# Supplementary material for: Molecular Interactions Associated with Coagulation of Organic Pollutants by 2S Albumin of Plant Proteins: A Computational Approach
Source: MDPI journal article supplement (doi:10.3390/molecules27051685), 2022-03-04
Supplement: s1 [file s1]

**Table S1:** The amino acid residues of the proteins that interacted with the organic molecules and the types of interaction involved

|        | Halogen bonds | Hydrogen bonds                                                                                                                                               | Alkyl                                                                                                                                                           | $\pi$ -alkyl   | $\pi$ -lone pair | Amide- $\pi$ -stacked | van der Waals | $\pi$ -cation | $\pi$ - $\pi$ -stacked | $\pi$ -sulfur | $\pi$ -sigma | $\pi$ -anion |
|--------|---------------|--------------------------------------------------------------------------------------------------------------------------------------------------------------|-----------------------------------------------------------------------------------------------------------------------------------------------------------------|----------------|------------------|-----------------------|---------------|---------------|------------------------|---------------|--------------|--------------|
| AH-Dic | CYS 75        | MET 103, ARG 116, MET 37, MET 33, ARG 88, CYS 28, GLN 57, PRO 27, CYS 109, CYS 61, ARG 52, PRO 114, GLY 72, GLN 71, SER 15, ARG 22, ASN 24, MET 103, LYS 99, | LEU 119, MET 103, MET 37, MET 33, ARG 88, MET 94, LEU 89, ILE 32, LEU 105, LEU 64, PRO 27, PRO 114, ALA 113, MET 103, LYS 99, PRO 106, LUE 78, LEU 119, LEU 10, | TYR 43, TYR 46 |                  |                       |               |               |                        |               |              |              |

|        |  |                                                                                                                                                                                                    |  |                                           |           |                                           |                       |                          |        |  |  |                                                  |
|--------|--|----------------------------------------------------------------------------------------------------------------------------------------------------------------------------------------------------|--|-------------------------------------------|-----------|-------------------------------------------|-----------------------|--------------------------|--------|--|--|--------------------------------------------------|
| AH-Nbb |  | ARG 112, ASN 65,<br>GLU 66, ASN 69,<br>ALA 113, GLN 71,<br>CYS 75, ARG 116,<br>CYS 117, GLN 107,<br>ALA 113, GLN 115,<br>GLN 71, GLU 68,<br>GLU 41, ARG 112,<br>ASP 47, ARG 52,<br>ARG 100, GLN 42 |  | ALA 113,<br>MET 67,<br>ILE 36,<br>MET 94, | GLU<br>68 | MET 67,<br>PRO 114,<br>GLN 115,<br>GLN 96 | GLN<br>115,<br>GLN 97 | ARG<br>52,<br>ARG<br>100 | TYR 46 |  |  | GLU<br>41,<br>ASP<br>47,<br>GLU<br>39,<br>ASP 44 |
|--------|--|----------------------------------------------------------------------------------------------------------------------------------------------------------------------------------------------------|--|-------------------------------------------|-----------|-------------------------------------------|-----------------------|--------------------------|--------|--|--|--------------------------------------------------|

|        |  |                                                                                                                           |                                                               |                |         |         |  |  |  |  |  |                |
|--------|--|---------------------------------------------------------------------------------------------------------------------------|---------------------------------------------------------------|----------------|---------|---------|--|--|--|--|--|----------------|
| AH-Sls |  | SER 127, ARG 9, GLY 8, GLU 17, GLU 76, ARG 4, ARG 18, ASP 21, ASP 91, GLN 40, GLN 93, ASP 118                             | ARG 5, ARG 125, MET 3, ARG 9, MET 94, MET 37, MET 33, VAL 121 |                |         |         |  |  |  |  |  |                |
| AH-Sum |  | SER 104, ARG 49, GLY 124, GLY 123, ARG 92, CYS 60, CYS 28, PRO 27, ASN 24, ARG 59, ASP 62, SER 127, ARG 5, ASP 87, GLY 11 | VAL 95, ARG 9, ARG 125                                        | MET 67, PRO 27 | SER 104 | GLY 123 |  |  |  |  |  | ASP 62, ASP 87 |







|            |  |                                                        |                                       |                                                                                       |                          |  |  |  |  |  |  |  |
|------------|--|--------------------------------------------------------|---------------------------------------|---------------------------------------------------------------------------------------|--------------------------|--|--|--|--|--|--|--|
| BE-<br>Sum |  | LYS 75, MET 103, SER<br>110, ARG 26, GLN 78,<br>GLN 27 | ILE 111, ARG<br>66, LEU 65,<br>MET 69 | LEU 18,<br>PRO 106,<br>PRO 102,<br>ARG 70,<br>ARG 66,<br>MET 25,<br>ARG 22,<br>MET 23 | CYS<br>105,<br>GLN<br>27 |  |  |  |  |  |  |  |
|------------|--|--------------------------------------------------------|---------------------------------------|---------------------------------------------------------------------------------------|--------------------------|--|--|--|--|--|--|--|

|        |  |                                                                                          |                                                                                                                                                                                                 |                                                |  |  |  |  |  |  |  |  |
|--------|--|------------------------------------------------------------------------------------------|-------------------------------------------------------------------------------------------------------------------------------------------------------------------------------------------------|------------------------------------------------|--|--|--|--|--|--|--|--|
| BN-Dic |  | THR 103, CYS 61, PRO 105, ALA 89, GLU 12, TRP 21, TRP 36, ASN 91, GLN 81, ARG 72, ILE 85 | PRO 93, LEU 92, ILE 101, MET 98, VAL 60, LEU 52, ARG 84, ILE 88, ILE 55, VAL 95, PRO 38, ILE 22, ILE 85, ALA 89, ILE 88, VAL 95, PRO 38, ILE 88, VAL 95, ILE 88, ILE 85, VAL 71, ARG 72, ARG 84 | TYR 53, TRP 21, HIS 14, TRP 21, TRP 36, TRP 36 |  |  |  |  |  |  |  |  |
|--------|--|------------------------------------------------------------------------------------------|-------------------------------------------------------------------------------------------------------------------------------------------------------------------------------------------------|------------------------------------------------|--|--|--|--|--|--|--|--|

|            |  |                                                                                                                                                                                                      |                |                 |                |                |  |  |  |        |                         |  |                        |
|------------|--|------------------------------------------------------------------------------------------------------------------------------------------------------------------------------------------------------|----------------|-----------------|----------------|----------------|--|--|--|--------|-------------------------|--|------------------------|
| BN-<br>Nbb |  | CYS 49, ASN 50, LYS 65, GLY 102, THR 103, ASP 56, CYS 96, GLU 46, HIS 77, GLN 76, GLY 78, SER 82, LYS 65, THR 83, GLU 33, GLN 74, ARG 23, GLN 24, ASN 34, SER 29, GLY 102, GLN 100, GLN 100, GLN 100 | LYS 69, PRO 79 | ILE 101, ARG 23 | ARG 72, VAL 71 | GLY 78, SER 82 |  |  |  | TYR 53 | CYS 49, CYS 49, CYS 96, |  | ASP 56, GLU 46, GLU 33 |
|------------|--|------------------------------------------------------------------------------------------------------------------------------------------------------------------------------------------------------|----------------|-----------------|----------------|----------------|--|--|--|--------|-------------------------|--|------------------------|

|        |  |                                                                                                                        |                                                                                                                 |                                                                 |  |  |  |        |        |                |  |  |
|--------|--|------------------------------------------------------------------------------------------------------------------------|-----------------------------------------------------------------------------------------------------------------|-----------------------------------------------------------------|--|--|--|--------|--------|----------------|--|--|
| BN-Sls |  | SER 29, GLY 28, GLN 25, ASN 97, ARG 45, ARG 84, LEU 26, GLN 25, ASN 97                                                 | ARG 16, ALA 17, LEU 64, LYS 65, VAL 60, ILE 101, LEU 92, VAL 95, ARG 45, VAL 95, MET 98, VAL 60, LEU 52, LEU 64 | PHE 31, PHE 106, TRP 21, PHE 31, TRP 36, PHE 31, TRP 21, PHE 31 |  |  |  |        |        |                |  |  |
| BN-Sum |  | CYS 61, LYS 65, GLN 57, ARG 72, SER 29, ASN 34, ARG 72, GLN 19, ARG 72, GLN 74, GLN 10, GLY 75, HIS 14, HIS 77, ARG 72 | LYS 65, PRO 93, MET 98, ARG 23, LEU 26, ARG 23                                                                  | LYS 65, TYR 86, PRO 30, LEU 26                                  |  |  |  | ARG 72 | TRP 36 | MET 98, HIS 77 |  |  |

[illegible]

|        |  |                                                                                                        |                                                                                        |                                                                                |        |        |  |        |                |                |  |                |
|--------|--|--------------------------------------------------------------------------------------------------------|----------------------------------------------------------------------------------------|--------------------------------------------------------------------------------|--------|--------|--|--------|----------------|----------------|--|----------------|
| HA-Nbb |  | ARG 43, ASN 57, GLU 73, CYS 11, GLU 19, ASN 22, MET 15, GLU 34, ARG 78, MET 53, CYS 51, LYS 30, MET 42 |                                                                                        | PRO 40, ARG 43, MET 20, ALA 18, MET 69, MET 15, MET 53, LEU 50, VAL 48, LYS 30 | MET 42 | ARG 78 |  | ARG 35 | HIS 23, HIS 47 | MET 75, MET 79 |  | GLU 73, GLU 19 |
| HA-Sls |  | ARG 35, GLU 73, TYR 12, GLU 16, GLY 3, GLY 5, ARG 35, TYR 27, ASN 31, HIS 23, GLN 54, GLU 19           | MET 29, ARG 78, MET 79, MET 75, MET 97, ALA 87, ILE 67, MET 75, LYS 48, MET 29, MET 26 | TYR 12, HIS 23                                                                 |        |        |  |        |                |                |  |                |

|        |  |                                                                                                                                                             |                                                                                                                                                                     |                                                                                              |  |  |  |           |  |                                                                                                 |  |                         |
|--------|--|-------------------------------------------------------------------------------------------------------------------------------------------------------------|---------------------------------------------------------------------------------------------------------------------------------------------------------------------|----------------------------------------------------------------------------------------------|--|--|--|-----------|--|-------------------------------------------------------------------------------------------------|--|-------------------------|
| HA-Sum |  | ARG 43, GLN 54,<br>MET 20, GLN 13,<br>ARG 35, GLU 16,<br>MET 103, ARG 4,<br>MET 103, THR 7, LEU<br>71, ARG 80                                               | LEU 50, LEU 32,<br>MET 29, MET<br>29, ARG 6                                                                                                                         | LEU 50,<br>LEU 32,<br>LEU 28,<br>MET 75,<br>MET 26,<br>TRP 76,<br>ARG 6,<br>TYR 2,<br>LEU 71 |  |  |  | ARG<br>80 |  | CYS<br>51,<br>MET<br>29,<br>MET<br>15,<br>MET<br>103,<br>CYS<br>64,<br>CYS<br>11,<br>MET<br>103 |  | ASP<br>81,<br>GLU<br>16 |
| MO-Dic |  | PRO 64, GLN 75,<br>ARG 77, GLY 43,<br>ARG 51, ILE 55, GLN<br>5, ARG 47, GLY 43,<br>GLN 40, GLN 31, TYR<br>46, ALA 54, GLN 25,<br>SER 22, HIS 44, ARG<br>51, | ARG 24, PRO<br>31, VAL 14,<br>ARG 47, PRO<br>39, ARG 51,<br>ALA 54, ARG<br>47, LEU 4, ARG<br>4, VAL 42, PRO<br>39, ALA 54, ILE<br>55, MET 61,<br>PRO 21, VAL<br>48, | PHE 65,<br>TYR 46,<br>TRP 88,<br>HIS 44                                                      |  |  |  |           |  |                                                                                                 |  |                         |



|        |  |                                                                                                                       |                                                      |                                        |        |                |  |                                |        |       |        |        |
|--------|--|-----------------------------------------------------------------------------------------------------------------------|------------------------------------------------------|----------------------------------------|--------|----------------|--|--------------------------------|--------|-------|--------|--------|
| MO-Nbb |  | MET 61, ARG 62, SER 50, GLN 40, ARG 79, ASN 57, ARG 51, ASN 57, CYS 8, GLN 40, ARG 47, GLN 41, SER 89, GLN 90, ARG 12 |                                                      | ARG 47, ILE 55, ALA 54, PRO 16         | ILE 55 | TYR 46, PRO 39 |  | ARG 79, ARG 62, ARG 47         |        |       |        | GLN 90 |
| MO-Sls |  | GLN 90, GLN 5, GLN 40, PHE 65                                                                                         | ARG 87, ARG 83, LEU 4, ILE 55, ILE 55, LEU 4, PRO 39 | TRP 88, TRP 88, TRP 88, TYR 46, PHE 65 |        |                |  |                                |        |       | TRP 88 |        |
| MO-Sum |  | ASN 57, ARG 47, ARG 87, ARG 83, GLN 33, GLN 90, ARG 77, ARG 24                                                        | ALA 54, ARG 83, PRO 64                               | ARG 47, TRP 88, PRO 1, VAL 84, PRO 64  |        |                |  | ARG 79, ARG 83, ARG 87, ARG 77 | TYR 46 | CYS 8 |        |        |

**Table S2:** Prominent residues for MO-pollutants interactions based on decomposed binding energies (kcal/mol)

| MO-Dic                  | MO-Nbb                  | MO-Sls                  | MO-Sum                  |
|-------------------------|-------------------------|-------------------------|-------------------------|
| TRP 88 (-2.884 ± 1.331) | PHE 65 (-5.072 ± 2.508) | TRP 88 (-3.605 ± 1.666) | ARG 83 (-5.160 ± 1.928) |
| ILE 55 (-2.031 ± 1.173) | ARG 62 (-3.571 ± 1.776) | ILE 55 (-2.933 ± 1.275) | ARG 24 (-3.375 ± 2.553) |
| PRO 21 (-1.981 ± 1.341) | TYR 46 (-3.137 ± 0.865) | TYR 46 (-2.713 ± 0.860) | TYR 46 (-2.056 ± 1.576) |
| LEU 4 (-1.727 ± 1.286)  | ARG 47 (-2.892 ± 1.553) | ARG 47 (-2.567 ± 1.718) | TRP 88 (-1.993 ± 1.948) |
| ARG 51 (-1.586 ± 0.987) | ARG 12(-2.787 ± 2.256)  | LEU 4 (-2.298 ± 1.323)  | ARG 51 (-1.825 ± 2.770) |
| VAL 48 (-1.414 ± 0.689) | GLN 59 (-2.628 ± 1.392) | VAL 84(-1.846 ± 0.906)  | GLN 33 (-1.352 ± 0.872) |
| GLN 25 (-1.329 ± 1.013) | ASN 13 (-2.522 ± 1.462) | PHE 65 (-1.791 ± 1.446) | ARG 79 (-1.211 ± 0.762) |
| PHE 17 (-1.214 ± 1.203) | THR 74 (-2.357 ± 1.865) | PRO 39 (-1.726 ± 1.295) | ILE 55 (-1.039 ± 1.202) |
| PRO 64 (-1.138 ± 1.412) | PRO 39 (-2.337 ± 0.938) | ARG 87 (-1.592 ± 1.485) |                         |
| ARG 24 (-1.094 ± 1.022) | GLN 73 (-2.019 ± 1.892) | ARG 51 (-1.532 ± 1.778) |                         |
|                         | PRO 16 (-1.966 ± 0.602) | GLY 43 (-1.428 ± 0.656) |                         |
|                         | MET 61(-1.897 ± 0.849)  | VAL 42 (-1.391 ± 0.705) |                         |
|                         | ARG 69 (-1.868 ± 1.949) | ARG 79 (-1.291 ± 2.183) |                         |
|                         | GLN 75 (-1.825 ± 1.360) | GLN 40 (-1.280 ± 1.305) |                         |
|                         | ARG 51 (-1.555 ± 0.966) | ARG 83 (-1.219 ± 1.608) |                         |
|                         | ALA 54 (-1.507 ± 0.564) |                         |                         |
|                         | ILE 55 (-1.468 ± 1.142) |                         |                         |
|                         | PRO 60 (-1.281 ± 0.623) |                         |                         |
|                         | GLN 40 (-1.226 ± 1.385) |                         |                         |
|                         | GLN 76 (-1.089 ± 1.027) |                         |                         |

**Table S3:** Prominent residues for AH-pollutants interactions based on decomposed binding energies (kcal/mol)

| AH-Dic                   | AH-Nbb                   | AH-Sls                   | AH-Sum                   |
|--------------------------|--------------------------|--------------------------|--------------------------|
| MET 33 (-2.156 ± 1.078)  | GLU 68 (-6.601 ± 4.192)  | VAL 121 (-3.153 ± 1.068) | ARG 59 (-2.735 ± 1.871)  |
| ILE 36 (-1.475 ± 0.749)  | ASP 47 (-5.626 ± 2.262)  | ARG 125 (-2.815 ± 2.507) | PHE 111 (-2.444 ± 1.630) |
| MET 37 (-1.327 ± 0.850)  | GLN 71 (-5.208 ± 2.106)  | ASP 21 (-2.811 ± 2.829)  | ASP 62 (-2.008 ± 1.502)  |
| ARG 88 (-1.247 ± 0.787)  | ASN 69 (-3.957 ± 1.860)  | PRO 2 (-1.633 ± 1.880)   | LYS 99 (-1.646 ± 1.419)  |
| MET 103 (-1.162 ± 1.092) | GLU 41 (-3.822 ± 1.702)  | MET 3 (-1.431 ± 1.505)   | ASN 110 (-1.628 ± 1.335) |
| LEU 119 (-1.121 ± 1.197) | TYR 46 (-3.159 ± 1.777)  | MET 33 (-1.347 ± 1.050)  | ARG 92 (-1.496 ± 2.121)  |
| LEU 102 (-1.060 ± 1.040) | ARG 112 (-3.159 ± 1.222) | MET 94 (-1.247 ± 0.977)  | SER 127 (-1.284 ± 1.771) |
| MET 94 (-1.004 ± 0.503)  | PRO 114 (-2.955 ± 0.620) | MET 37 (-1.209 ± 0.746)  | GLY 123 (-1.196 ± 0.635) |
|                          | ARG 52 (-2.942 ± 1.872)  | ASP 118 (-1.194 ± 1.672) | GLN 96 (-1.146 ± 1.188)  |
|                          | ARG 116 (-2.562 ± 1.707) | ARG 4 (-1.186 ± 1.622)   | TYR 46 (-1.090 ± 1.733)  |
|                          | ILE 48 (-2.257 ± 1.311)  | ILE 36 (-1.178 ± 0.782)  | ARG 112 (-1.037 ± 0.970) |
|                          | TYR 43 (-1.940 ± 1.170)  | TYR 46 (-1.076 ± 1.528)  |                          |
|                          | MET 67 (-1.908 ± 1.363)  |                          |                          |
|                          | ARG 49 (-1.876 ± 1.680)  |                          |                          |
|                          | MET 37 (-1.582 ± 0.493)  |                          |                          |
|                          | MET 94 (-1.341 ± 0.613)  |                          |                          |
|                          | THR 70 (-1.259 ± 1.585)  |                          |                          |
|                          | SER 53 (-1.236 ± 1.224)  |                          |                          |

**Table S4:** Prominent residues for BE-pollutants interactions based on decomposed binding energies (kcal/mol)

| BE-Dic                  | BE-Nbb                   | BE-Sls                   | BE-Sum                  |
|-------------------------|--------------------------|--------------------------|-------------------------|
| MET 88 (-2.499 ± 1.115) | GLU 76 (-4.982 ± 4.353)  | GLU 92 (-4.134 ± 4.377)  | ARG 14 (-2.782 ± 3.154) |
| MET 69 (-2.266 ± 1.627) | GLU 30 (-4.755 ± 1.638)  | LEU 90 (-2.339 ± 1.135)  | ARG 26 (-2.491 ± 2.301) |
| MET 84 (-1.914 ± 0.819) | ARG 26 (-4.128 ± 1.662)  | ARG 89 (-2.033 ± 1.672)  | GLN 27 (-1.370 ± 1.343) |
| ILE 94 (-1.589 ± 1.420) | GLU 82 (-2.027 ± 3.580)  | ILE 111 (-2.017 ± 2.472) | MET 23 (-1.171 ± 0.984) |
| LEU 90 (-1.516 ± 0.751) | GLN 74 (-1.885 ± 2.302)  | PHE 114 (-1.664 ± 1.850) |                         |
| GLN 73 (-1.400 ± 0.889) | MET 29 (-1.586 ± 0.496)  | MET 84 (-1.363 ± 1.133)  |                         |
| MET 42 (-1.268 ± 1.035) | GLN 78 (-1.483 ± 1.396)  | PRO 79 (-1.238 ± 1.562)  |                         |
| MET 72 (-1.256 ± 0.725) | LEU 90 (-1.469 ± 0.654)  | MET 87 (-1.189 ± 0.805)  |                         |
| ALA 91 (-1.209 ± 0.904) | ALA 112 (-1.372 ± 0.966) | MET 37 (-1.175 ± 0.879)  |                         |
| LEU 65 (-1.176 ± 1.324) | PHE 114 (-1.309 ± 1.782) | ALA 112 (-1.167 ± 1.489) |                         |
| MET 77 (-1.167 ± 0.990) | ILE 111 (-1.262 ± 0.768) | MET 29 (-1.090 ± 0.727)  |                         |
| MET 87 (-1.091 ± 0.690) | ARG 40 (-1.223 ± 1.541)  | MET 25 (-1.084 ± 0.564)  |                         |
| MET 23 (-1.058 ± 0.926) | MET 77 (-1.216 ± 0.709)  |                          |                         |
| MET 46 (-1.037 ± 0.772) | ARG 80 (-1.215 ± 1.584)  |                          |                         |
|                         | MET 23 (-1.123 ± 0.803)  |                          |                         |
|                         | MET 37 (-1.080 ± 0.709)  |                          |                         |

**Table S5:** Prominent residues for BN-pollutants interactions based on decomposed binding energies (kcal/mol)

| BN-Dic                  | BN-Nbb                   | BN-Sls                   | BN-Sum                  |
|-------------------------|--------------------------|--------------------------|-------------------------|
| ILE 88 (-3.292 ± 2.045) | GLU 46 (-4.948 ± 1.384)  | TRP 36 (-3.429 ± 1.811)  | TRP 36 (-4.011 ± 1.479) |
| LEU 26 (-2.260 ± 1.275) | GLU 33 (-4.607 ± 3.142)  | ILE 101 (-2.613 ± 1.576) | ARG 72 (-2.748 ± 3.495) |
| VAL 95 (-2.172 ± 1.210) | ASP 56 (-3.904 ± 1.215)  | PHE 106 (-2.606 ± 1.549) | HIS 14 (-2.307 ± 0.945) |
| ILE 85 (-1.952 ± 0.983) | TYR 53 (-3.900 ± 0.846)  | PHE 31 (-2.345 ± 1.921)  | PHE 31 (-2.026 ± 1.483) |
| TRP 36 (-1.689 ± 1.422) | ILE 101 (-3.857 ± 1.315) | ILE 88 (-2.141 ± 0.838)  | GLN 74 (-1.898 ± 1.534) |
| ARG 72 (-1.532 ± 0.963) | ARG 23 (-3.504 ± 1.338)  | MET 98 (-1.919 ± 1.278)  | GLN 10 (-1.644 ± 1.672) |
| TRP 21 (-1.486 ± 0.821) | ILE 109 (-3.178 ± 3.597) | VAL 95 (-1.909 ± 1.643)  | PRO 30 (-1.458 ± 1.045) |
| ILE 22 (-1.455 ± 1.052) | GLY 102 (-2.940 ± 1.091) | ARG 84 (-1.892 ± 1.586)  | ARG 23 (-1.351 ± 2.116) |
| LEU 92 (-1.439 ± 1.077) | GLN 100 (-2.747 ± 2.631) | GLN 25 (-1.730 ± 1.819)  | LEU 26 (-1.265 ± 1.128) |
| GLN 25 (-1.396 ± 1.149) | THR 103 (-2.263 ± 1.587) | VAL 58 (-1.677 ± 1.059)  | GLY 75 (-1.245 ± 1.203) |
| LEU 52 (-1.316 ± 0.450) | VAL 73 (-1.959 ± 1.182)  | VAL 60 (-1.640 ± 1.056)  | ARG 16 (-1.093 ± 1.855) |
| MET 98 (-1.298 ± 0.454) | PRO 79 (-1.757 ± 1.223)  | CYS 61 (-1.477 ± 0.934)  | LYS 65 (-1.073 ± 1.240) |
| ARG 84 (-1.202 ± 1.078) | VAL 71 (-1.738 ± 1.411)  | ARG 45 (-1.349 ± 1.652)  | GLN 3 (-1.027 ± 1.435)  |
| VAL 71 (-1.095 ± 0.690) | GLN 1 (1.598 ± 1.603)    | GLN 87 (-1.340 ± 0.921)  |                         |
| PRO 93 (-1.059 ± 0.589) | CYS 49 (-1.349 ± 0.568)  | TYR 53 (-1.307 ± 1.405)  |                         |
| GLN 20 (-1.021 ± 0.895) | ARG 72 (-1.308 ± 1.142)  | PRO 93 (-1.280 ± 0.792)  |                         |
| VAL 60 (-1.018 ± 0.363) | GLN 74 (-1.292 ± 1.079)  | LEU 92 (-1.230 ± 0.972)  |                         |
| GLN 57 (-1.006 ± 0.528) | LEU 26 (-1.234 ± 1.093)  | ASN 91 (-1.116 ± 0.825)  |                         |
|                         | PRO 62 (-1.229 ± 1.006)  | LEU 26 (-1.099 ± 0.821)  |                         |
|                         | PRO 42 (-1.154 ± 0.609)  | GLN 20 (-1.096 ± 0.845)  |                         |
|                         | LYS 99 (-1.118 ± 1.016)  | CYS 104 (-1.094 ± 0.824) |                         |
|                         | PRO 30 (-1.061 ± 0.611)  | TRP 21 (-1.087 ± 0.584)  |                         |
|                         |                          | LEU 64 (-1.046 ± 0.623)  |                         |
|                         |                          | CYS 49 (-1.028 ± 0.932)  |                         |

**Table S6:** Prominent residues for HA-pollutants interactions based on decomposed binding energies (kcal/mol)

| HA-Dic                  | HA-Nbb                  | HA-Sls                   | HA-Sum                   |
|-------------------------|-------------------------|--------------------------|--------------------------|
| MET 86 (-3.034 ± 1.226) | GLU 19 (-5.476 ± 2.033) | MET 75 (-2.174 ± 1.455)  | TYR 2 (-2.098 ± 1.277)   |
| TYR 27 (-2.288 ± 1.084) | GLU 73 (-4.671 ± 1.184) | ARG 35 (-1.960 ± 2.360)  | TYR 12 (-1.929 ± 1.809)  |
| LEU 28 (-2.262 ± 1.419) | ASN 31 (-2.244 ± 1.839) | GLU 73 (-1.660 ± 2.664)  | ASN 72 (-1.826 ± 1.510)  |
| LEU 90 (-2.169 ± 0.969) | ARG 4 (-2.038 ± 1.643)  | TYR 12 (-1.614 ± 1.665)  | LEU 71 (-1.399 ± 0.971)  |
| LEU 55 (-2.093 ± 1.243) | LEU 32 (-2.009 ± 0.723) | MET 86 (-1.481 ± 0.428)  | LYS 61 (-1.387 ± 1.033)  |
| CYS 24 (-1.951 ± 1.007) | ARG 43 (-1.881 ± 1.765) | MET 103 (-1.463 ± 1.555) | MET 75 (-1.370 ± 1.430)  |
| CYS 51 (-1.767 ± 0.981) | MET 15 (-1.729 ± 0.690) | GLU 16 (-1.377 ± 1.955)  | GLN 102 (-1.317 ± 1.445) |
| MET 68 (-1.731 ± 0.778) | LEU 50 (-1.670 ± 0.999) | MET 26 (-1.280 ± 1.067)  | ARG 80 (-1.097 ± 1.983)  |
| LYS 48 (-1.631 ± 1.011) | GLN 54 (-1.608 ± 1.234) | CYS 64 (-1.262 ± 0.593)  | MET 103 (-1.015 ± 0.975) |
| CYS 52 (-1.623 ± 0.812) | ARG 78 (-1.607 ± 1.654) | PRO 74 (-1.213 ± 1.030)  |                          |
| CYS 64 (-1.537 ± 0.690) | MET 69 (-1.572 ± 0.554) | MET 68 (-1.163 ± 0.615)  |                          |
| ILE 67 (-1.521 ± 0.969) | TYR 12 (-1.534 ± 0.662) | LEU 90 (-1.158 ± 0.565)  |                          |
| HIS 47 (-1.474 ± 1.101) | MET 53 (-1.435 ± 0.841) | TYR 27 (-1.104 ± 0.845)  |                          |
| HIS 23 (-1.260 ± 0.837) | MET 75 (-1.298 ± 0.878) | ILE 67 (-1.078 ± 0.607)  |                          |
| LEU 50 (-1.236 ± 0.864) | ASN 57 (-1.273 ± 1.305) |                          |                          |
| MET 26 (-1.091 ± 0.964) | GLN 82 (-1.176 ± 1.132) |                          |                          |
| VAL 83 (-1.068 ± 0.760) | GLU 34 (-1.118 ± 1.968) |                          |                          |
|                         | MET 42 (-1.083 ± 1.411) |                          |                          |
|                         | MET 20 (-1.033 ± 0.606) |                          |                          |
|                         | PRO 74 (-1.025 ± 0.592) |                          |                          |

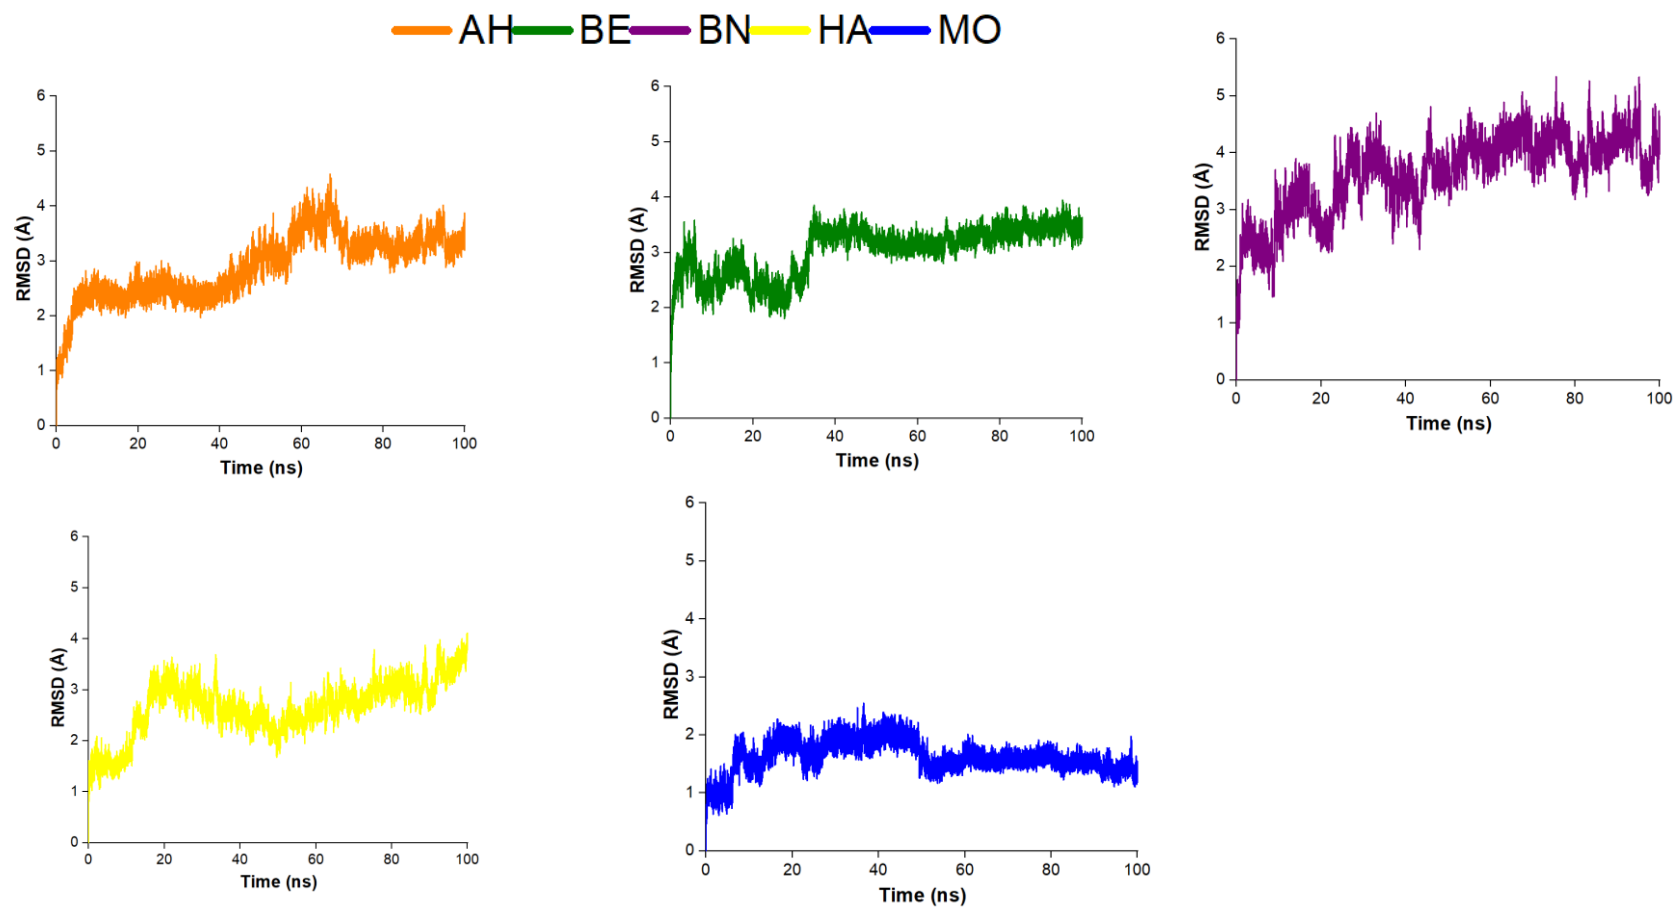

**Figure S1(a):** The stability of the proteins without the ligands at 100 ns simulation time derived from the plot of RMSD. Individual plots are presented.

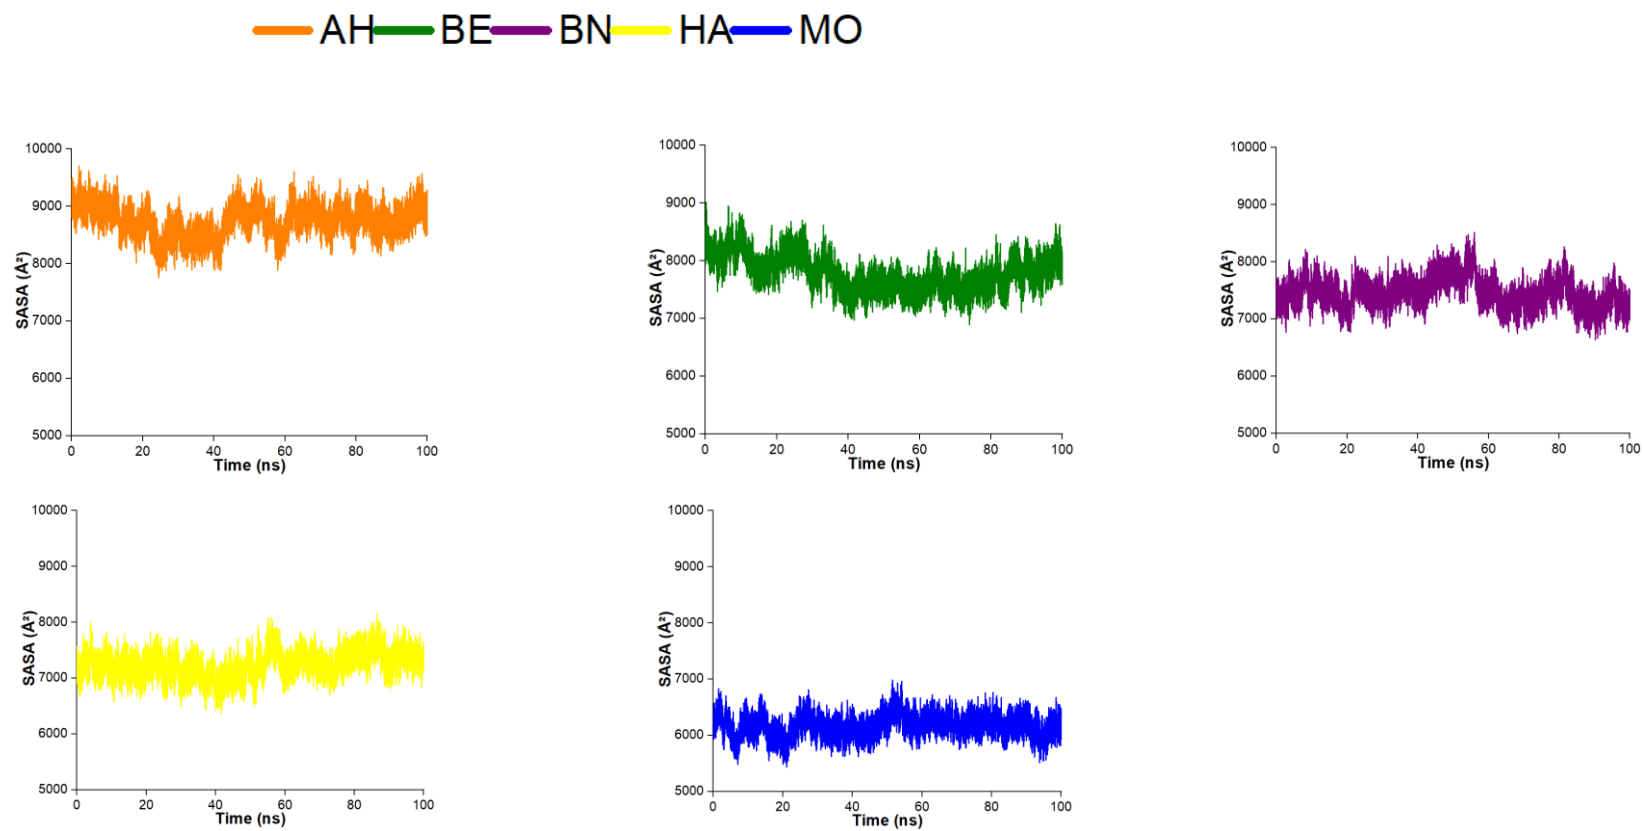

**Figure S1(b):** The stability of the proteins without the ligands at 100 ns simulation time derived from the plot of SASA. Individual plots are presented.



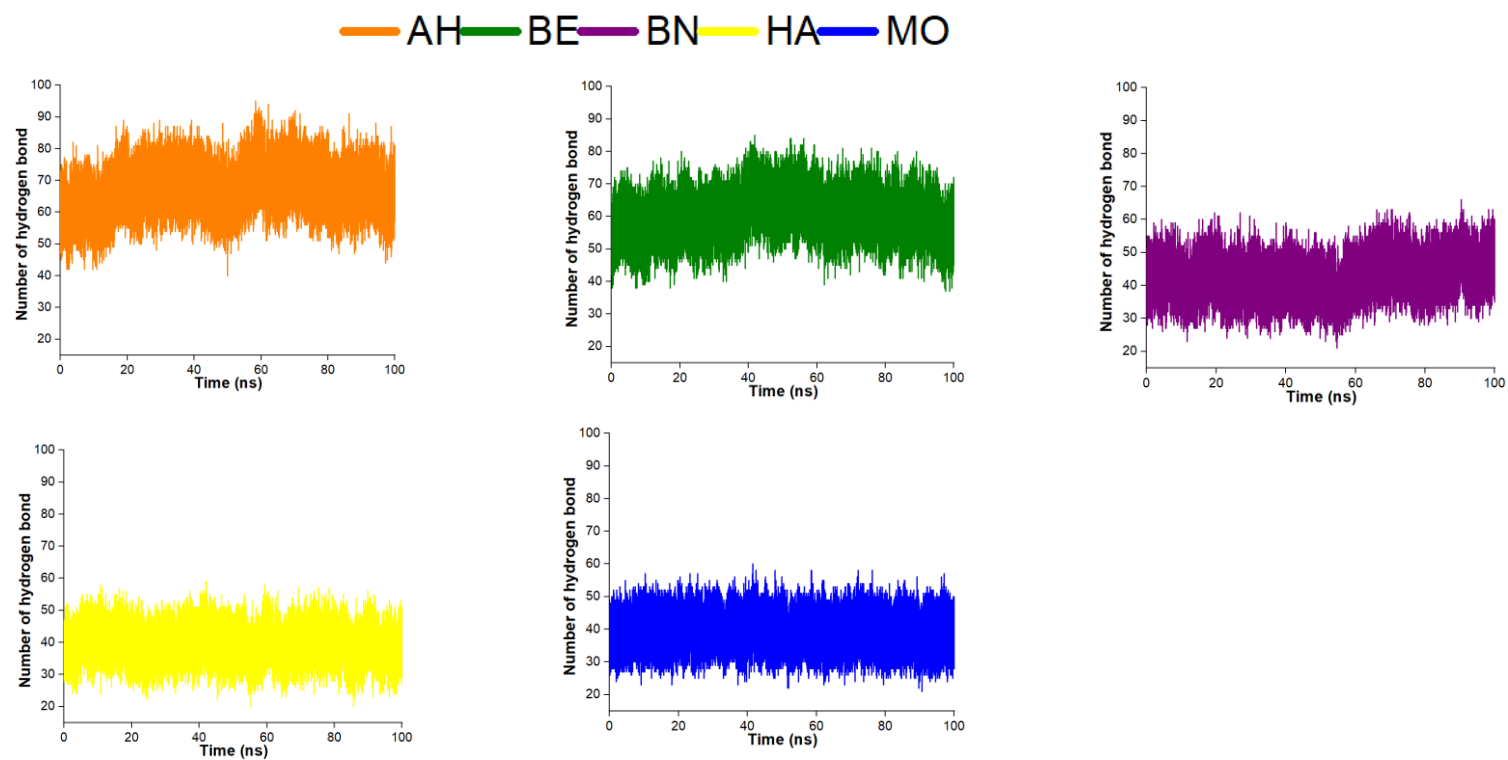

**Figure S1(c):** The stability of the proteins without the ligands at 100 ns simulation time derived from the plot of number of hydrogen bond. Individual plots are presented.

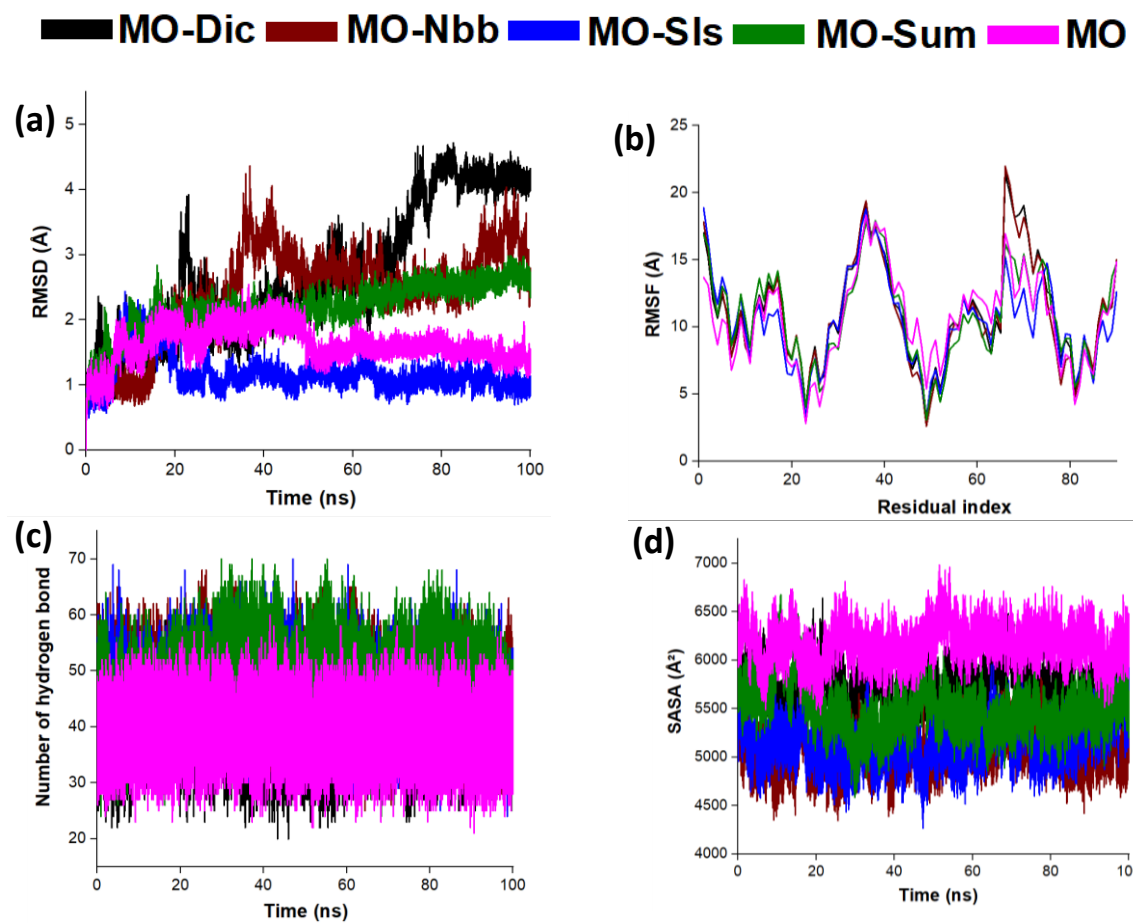

**Figure S2:** The stability of the MO protein without the ligands and the various complexes formed at 100 ns simulation time derived from the plot of (a) RMSD (Å), (b) RMSF (Å), (c) Number of hydrogen bond and (d) SASA (Å<sup>2</sup>)

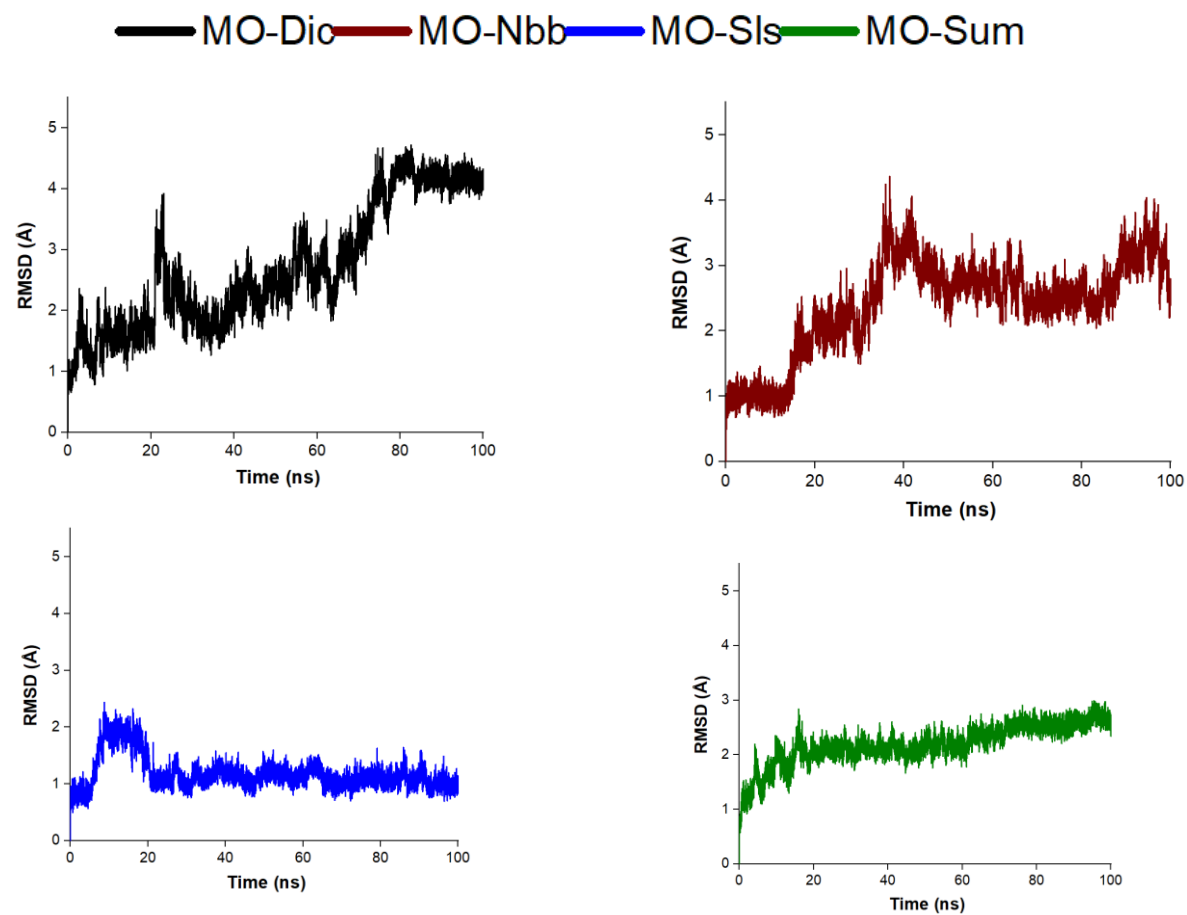

**Figure S3(a):** The stability of the various MO-pollutant complexes at 100 ns simulation time derived from the plot of RMSD

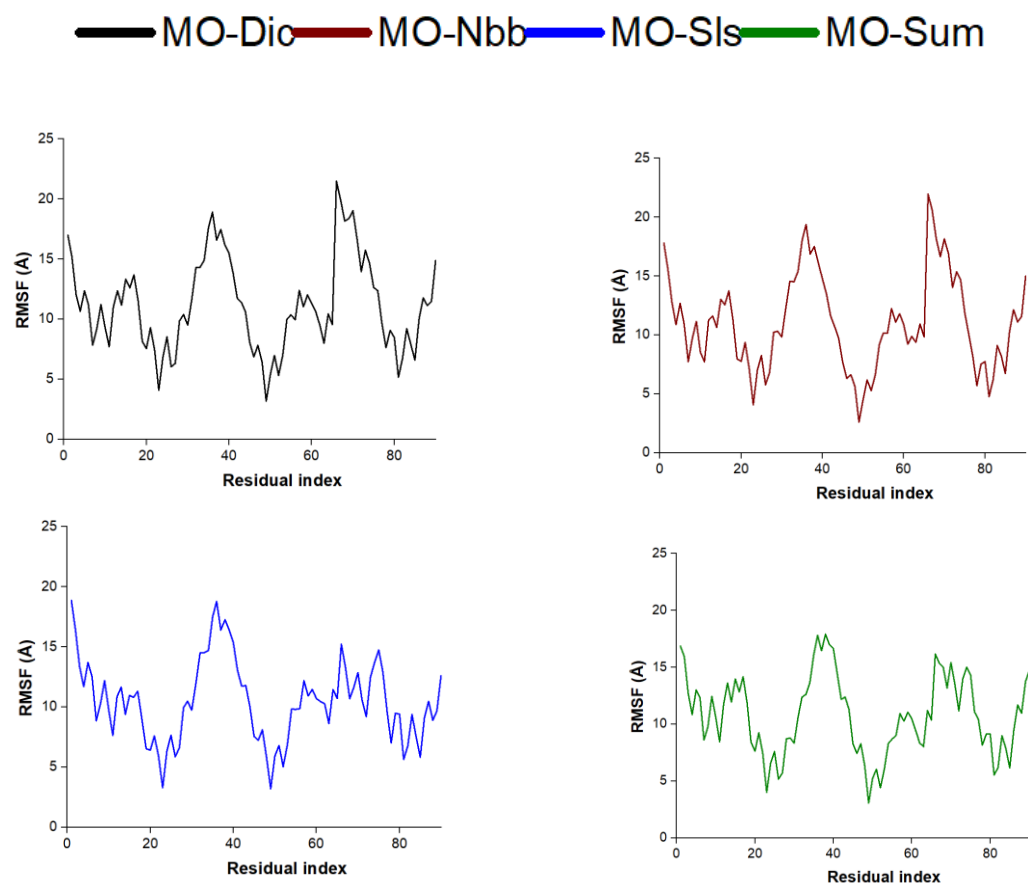

**Figure S3(b):** The stability of the various MO-pollutant complexes at 100 ns simulation time derived from the plot of RMSF

— MO-Dic — MO-Nbb — MO-Sls — MO-Sum

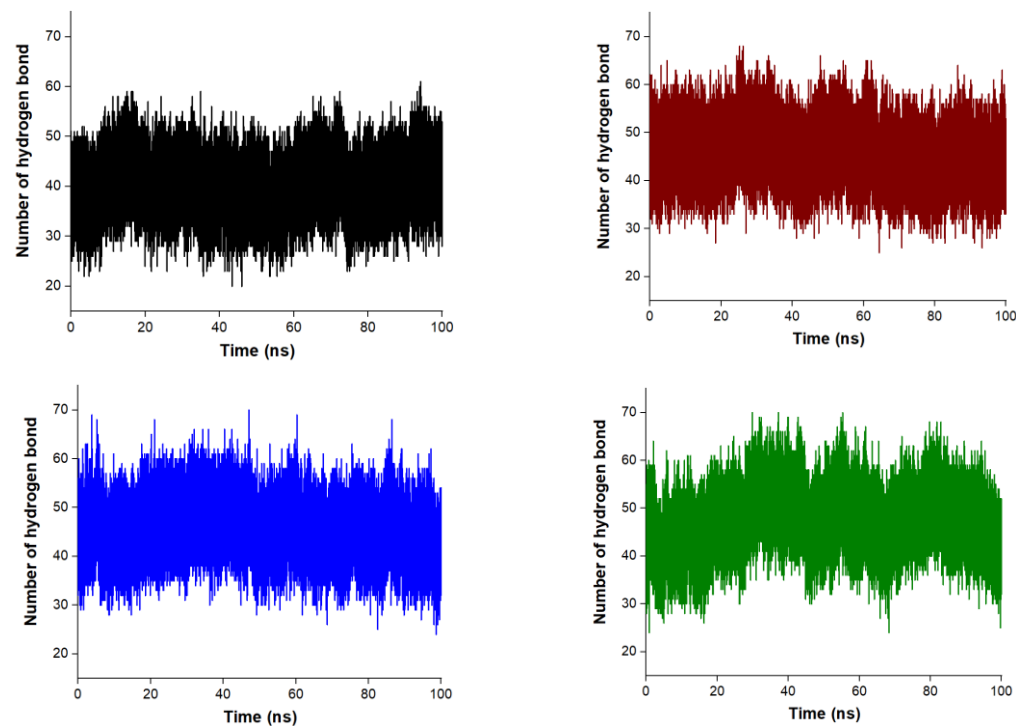

**Figure S3(c):** The stability of the various MO-pollutant complexes at 100 ns simulation time derived from the plot of number of hydrogen bond

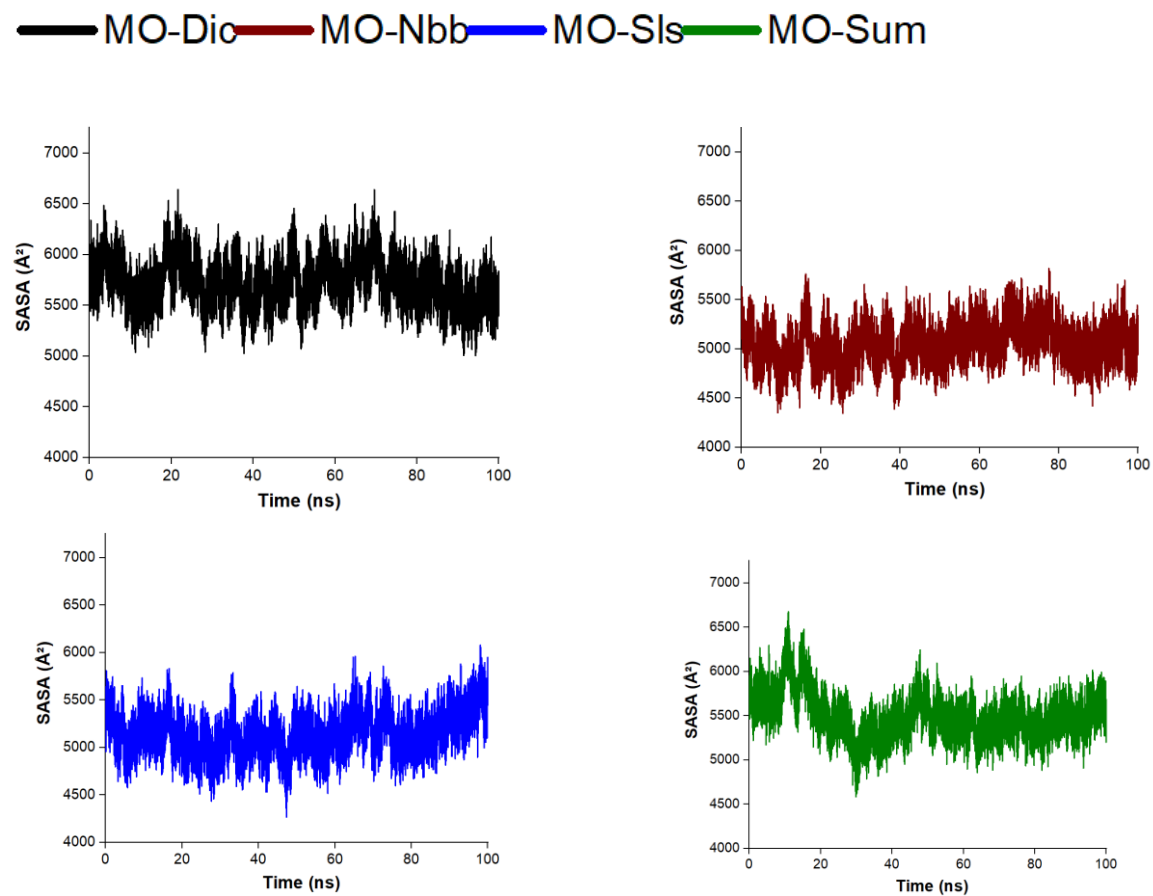

**Figure S3(d):** The stability of the various MO-pollutant complexes at 100 ns simulation time derived from the plot of SASA

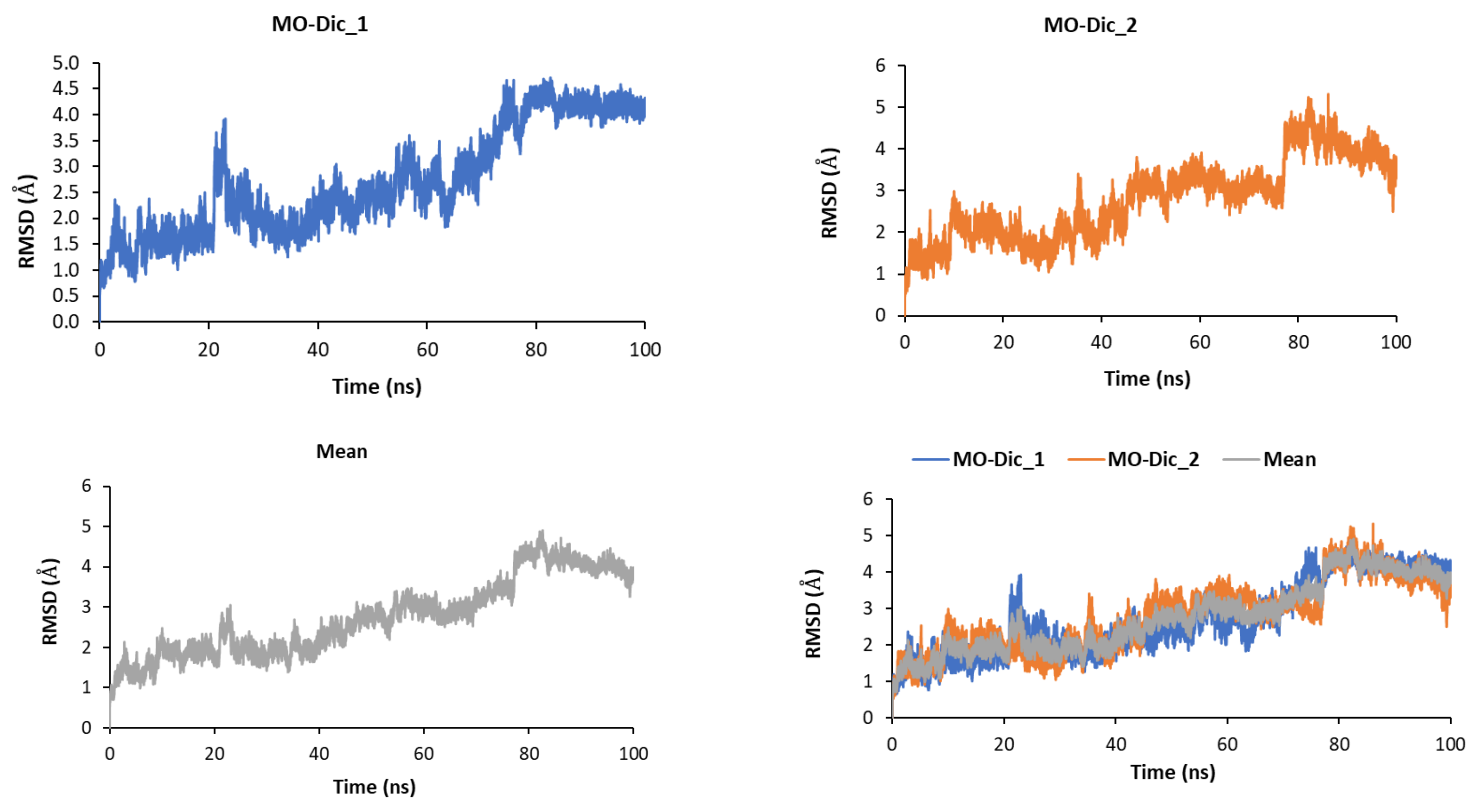

**Figure S4(a):** The RMSD of MO-Dic complex run in duplicate. MO-Dic\_1 as first run, MO-Dic\_2 as second run and mean as the average of the two runs.

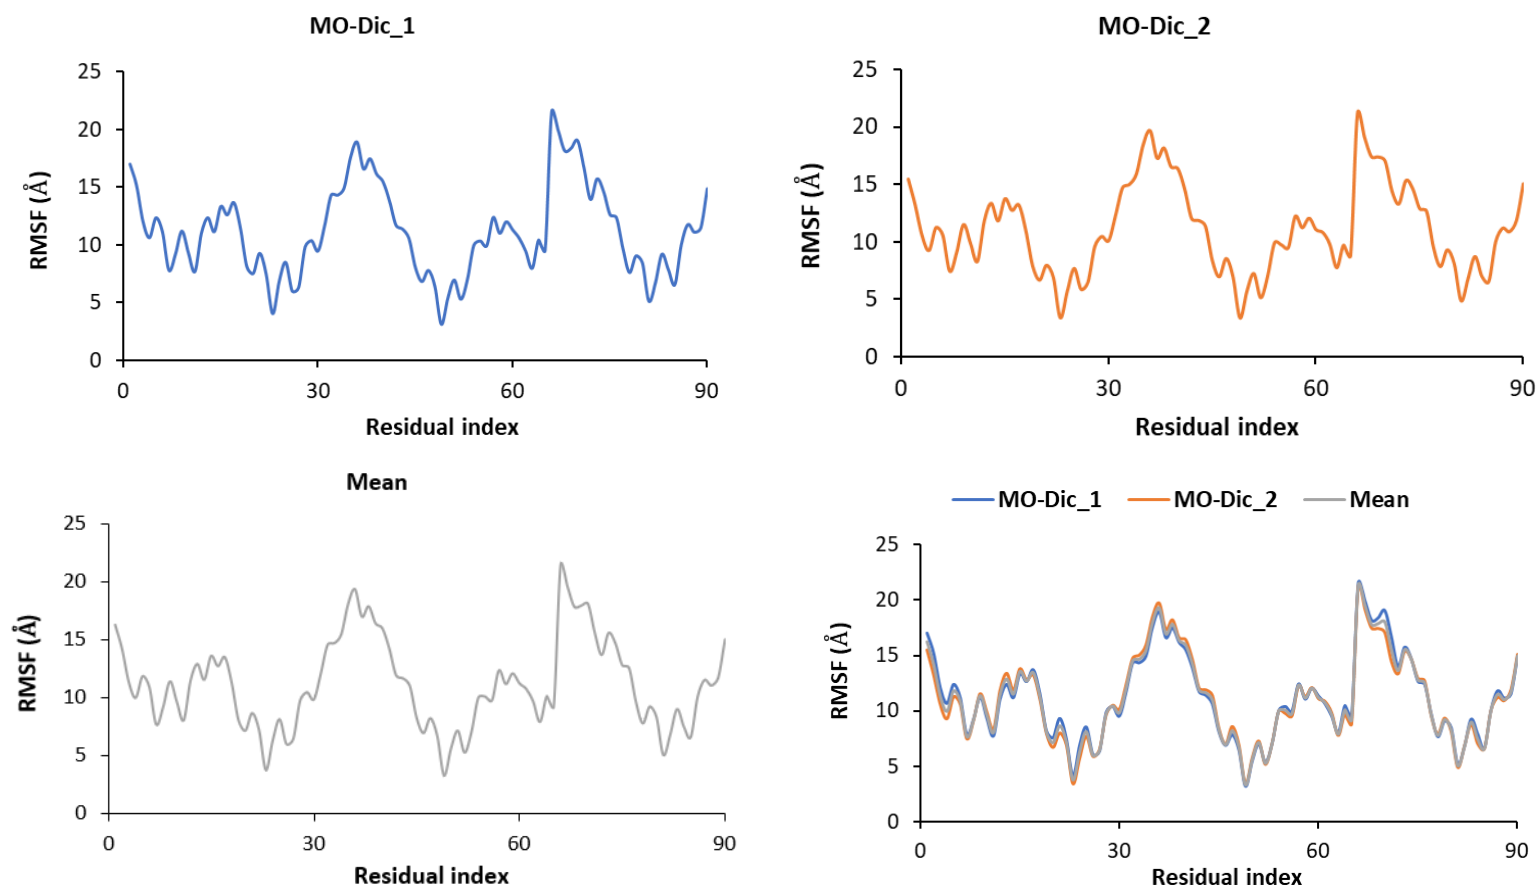

**Figure S4(b):** The RMSF of MO-Dic complex run in duplicate. MO-Dic\_1 as first run, MO-Dic\_2 as second run and mean as the average of the two runs.



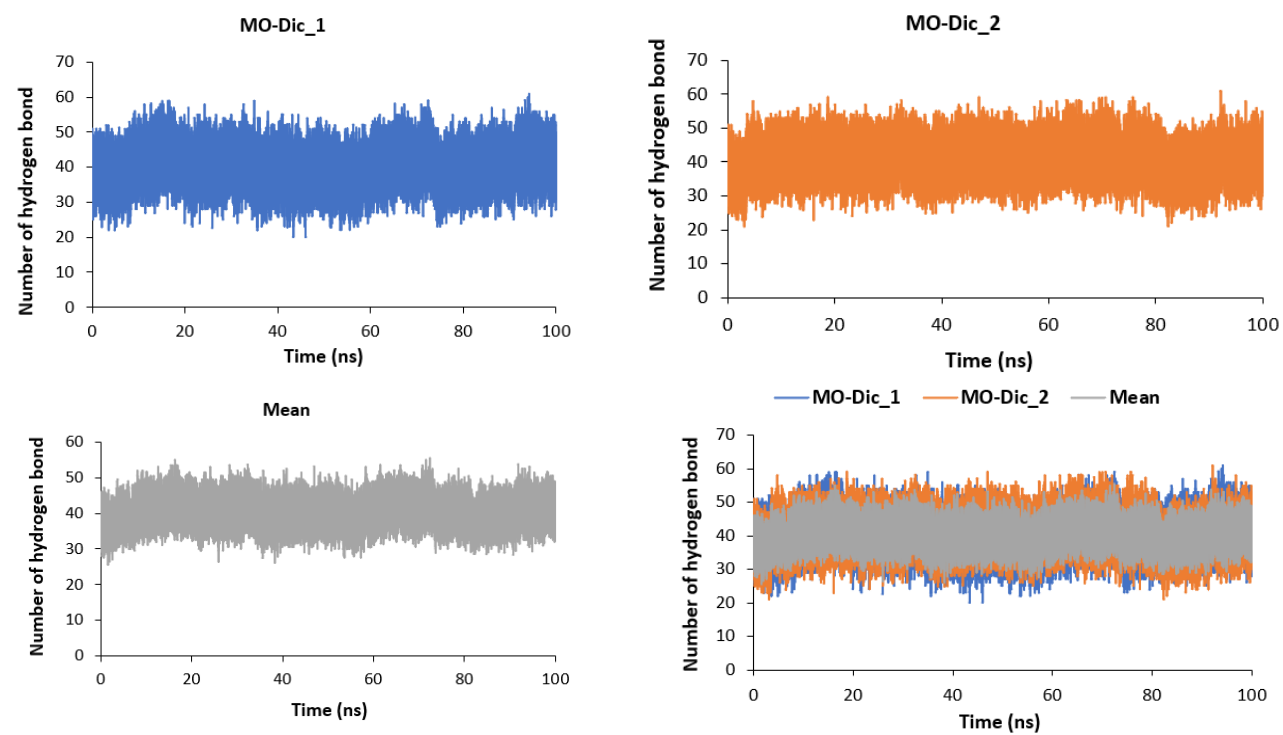

**Figure S4(c):** The plots of number of hydrogen bond of MO-Dic complex run in duplicate. MO-Dic\_1 as first run, MO-Dic\_2 as second run and mean as the average of the two runs.

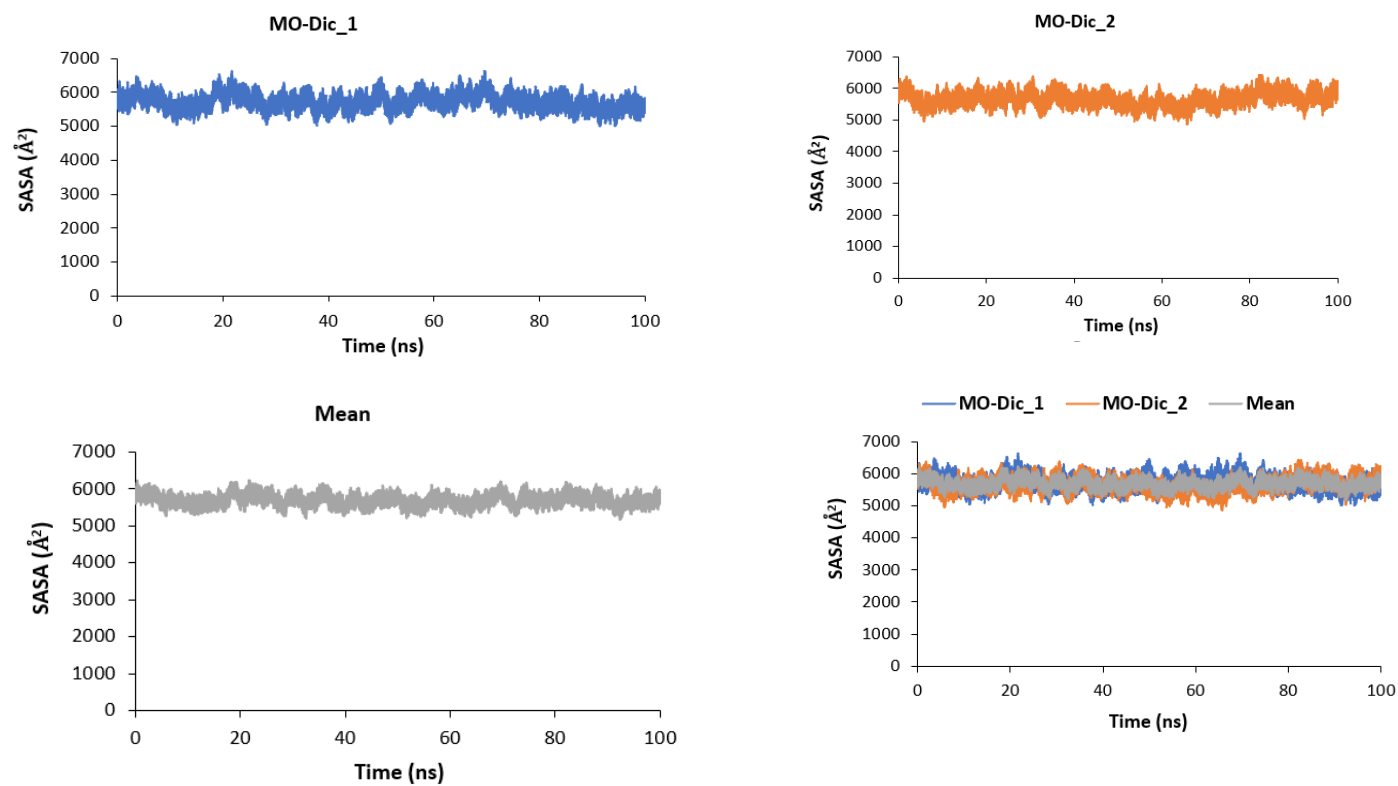

**Figure S4(d):** The plots of SASA for MO-Dic complex run in duplicate. MO-Dic\_1 as first run, MO-Dic\_2 as second run and mean as the average of the two runs.

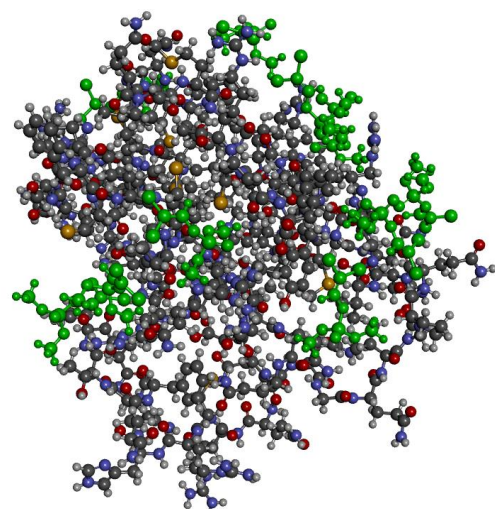

**MO-Dic\_1**

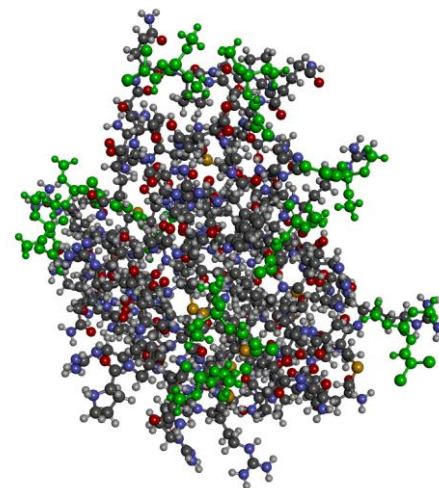

**MO-Dic\_2**

**Figure S5:** The representative snapshots of the clustering of the Dic pollutant around MO protein with 100% coagulation. MO-Dic\_1 (binding energy of -85.60 kcal/mol) and MO-Dic\_2 (binding energy of -88.68 kcal/mol) represent first and second run respectively.

**Table S7:** Prominent residues for MO-pollutants interactions based on decomposed binding energies (kcal/mol)

| MO-Dic_2 |                       |
|----------|-----------------------|
| TRP      | 88 (-2.967 +/- 0.984) |
| LEU      | 4 (-1.985 +/- 1.254)  |
| VAL      | 48 (-1.600 +/- 0.551) |
| ILE      | 55 (-1.583 +/- 0.790) |
| ARG      | 51 (-1.512 +/- 0.784) |
| GLN      | 25 (-1.298 +/- 0.777) |
| PHE      | 17 (-1.039 +/- 1.218) |
| PRO      | 21 (-0.810 +/- 0.930) |
| PRO      | 64 (-0.602 +/- 0.866) |
| ARG      | 24 (-0.514 +/- 0.875) |

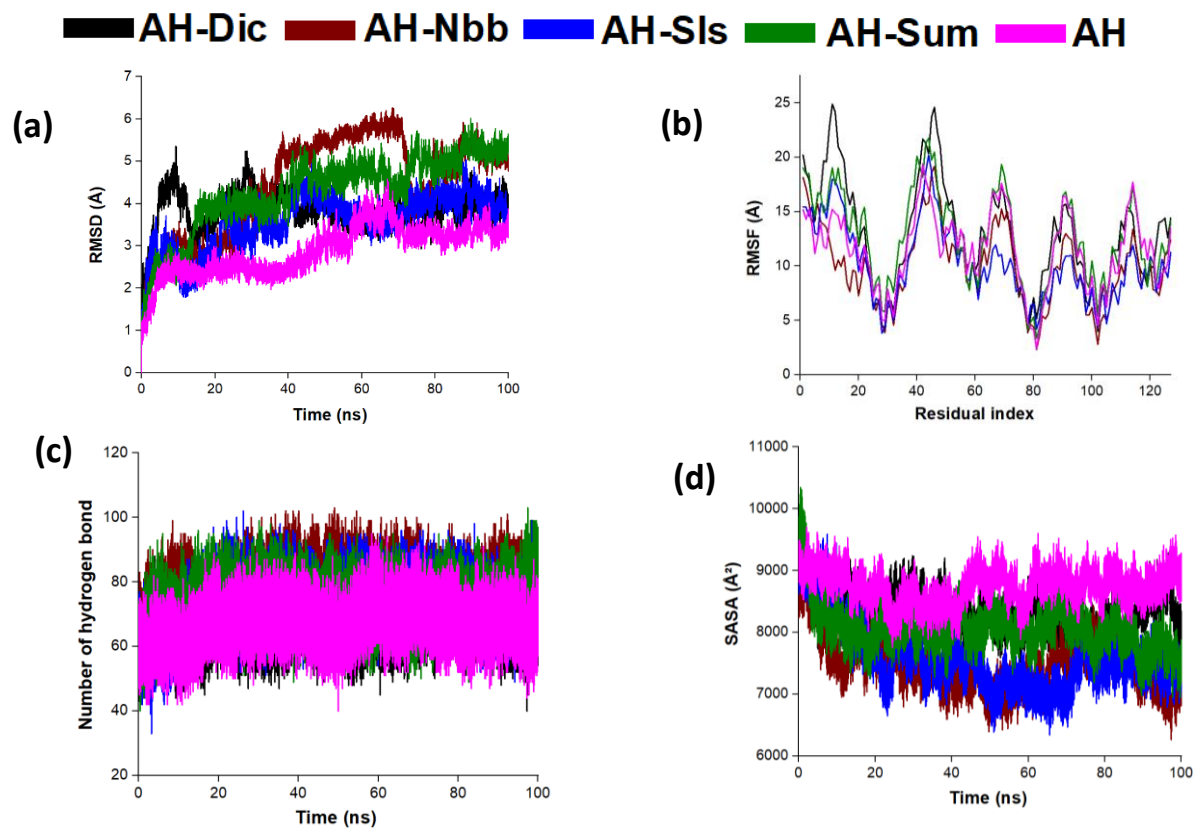

**Figure S6:** The stability of the AH protein without the ligands and the various complexes formed at 100 ns simulation time derived from the plot of (a) RMSD (Å), (b) RMSF (Å), (c) Number of hydrogen bond and (d) SASA (Å<sup>2</sup>)

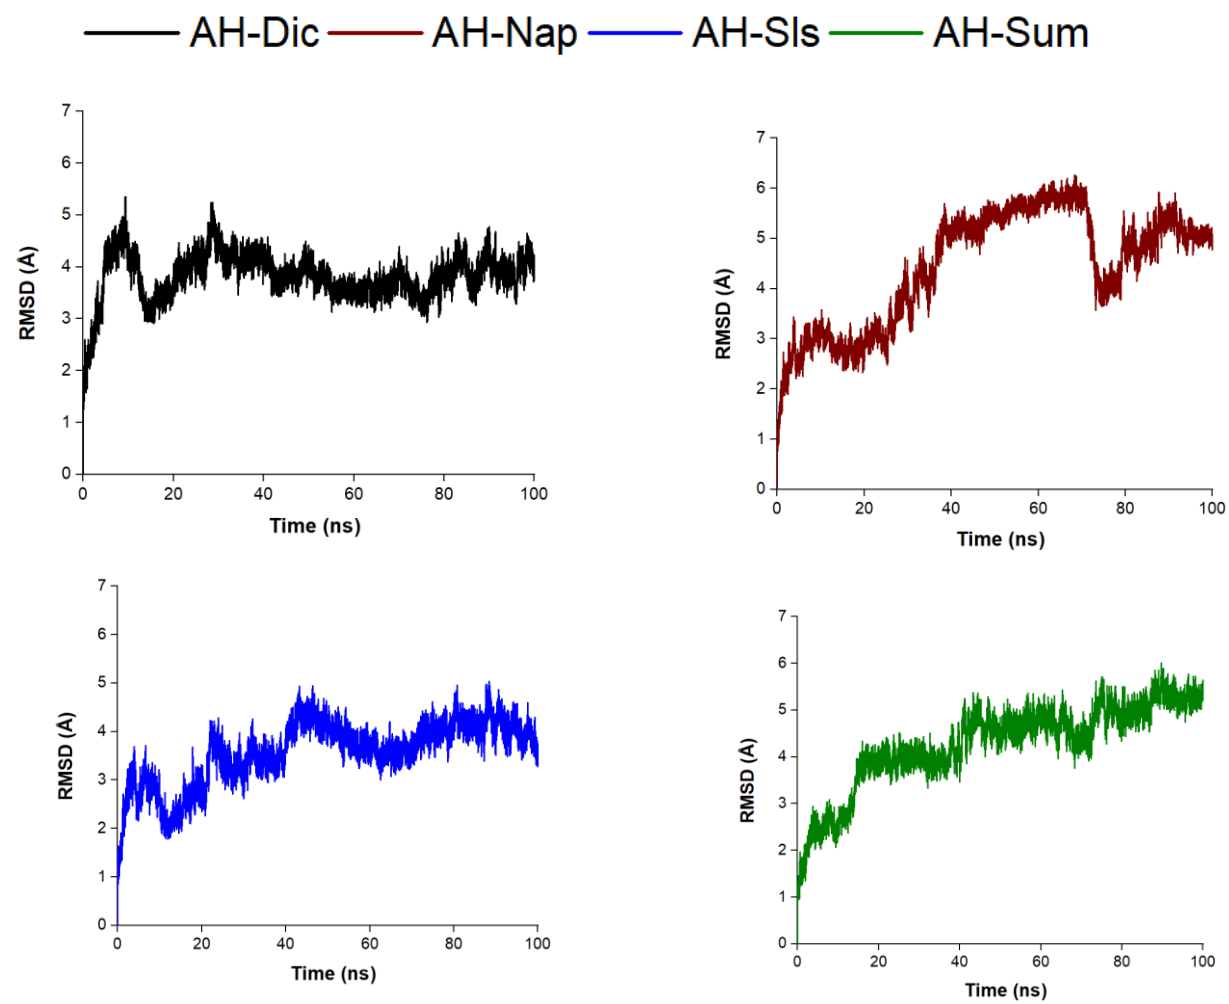

**Figure S7(a):** The stability of the various AH-pollutant complexes at 100 ns simulation time derived from the plot of RMSD

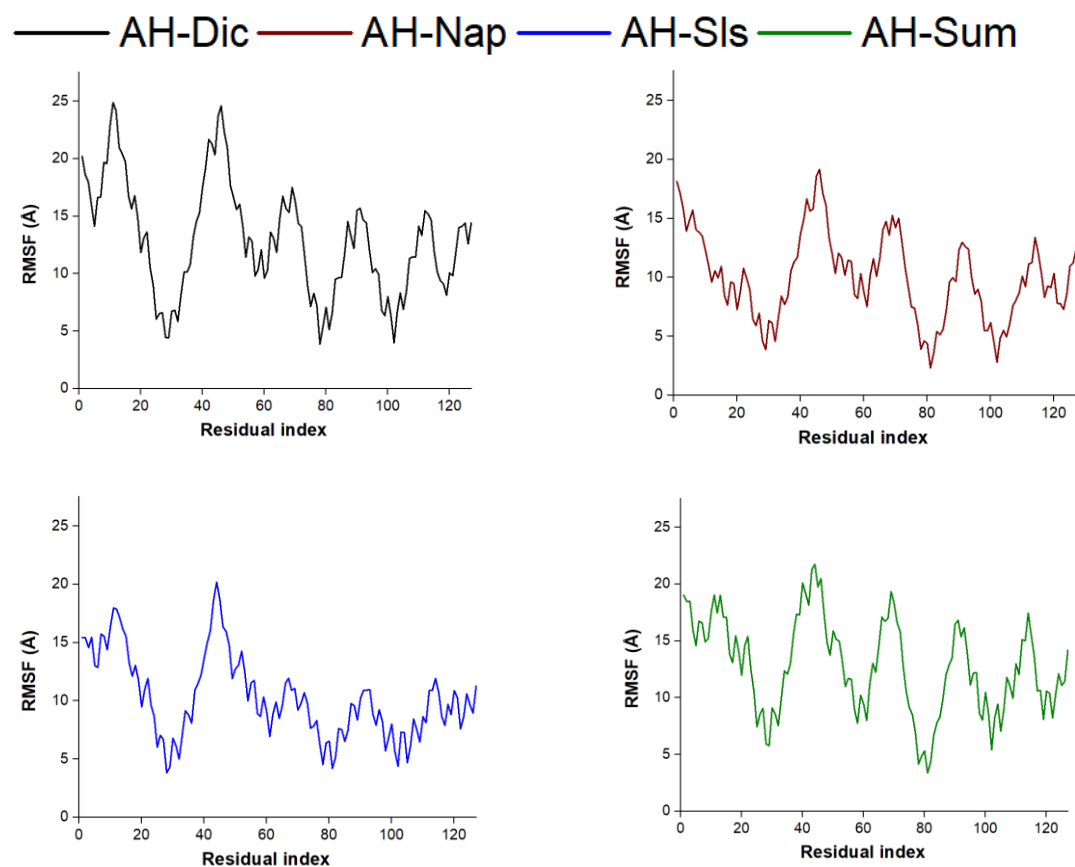

**Figure S7(b):** The stability of the various AH-pollutant complexes at 100 ns simulation time derived from the plot of RMSF

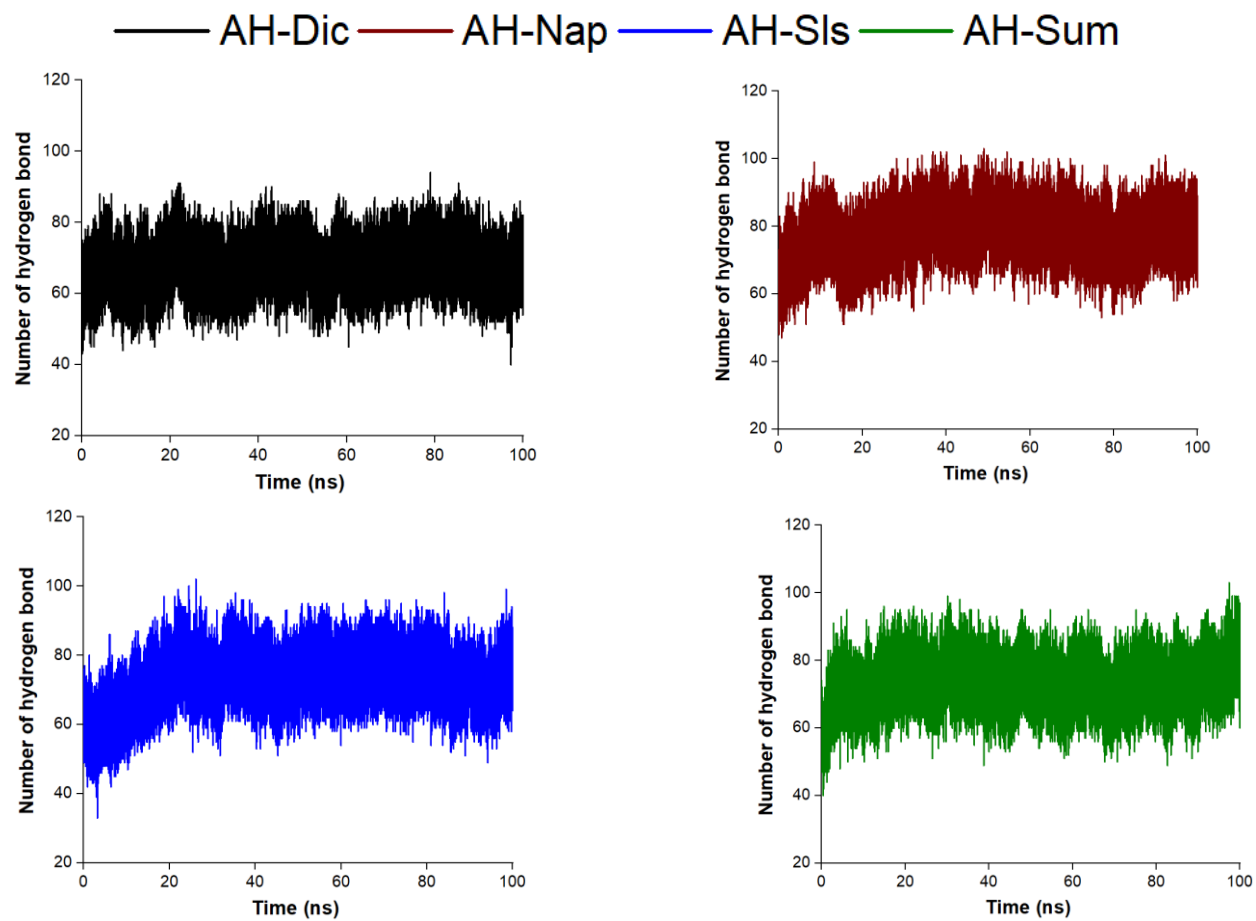

**Figure S7(c):** The stability of the various AH-pollutant complexes at 100 ns simulation time derived from the plot of number of hydrogen bond



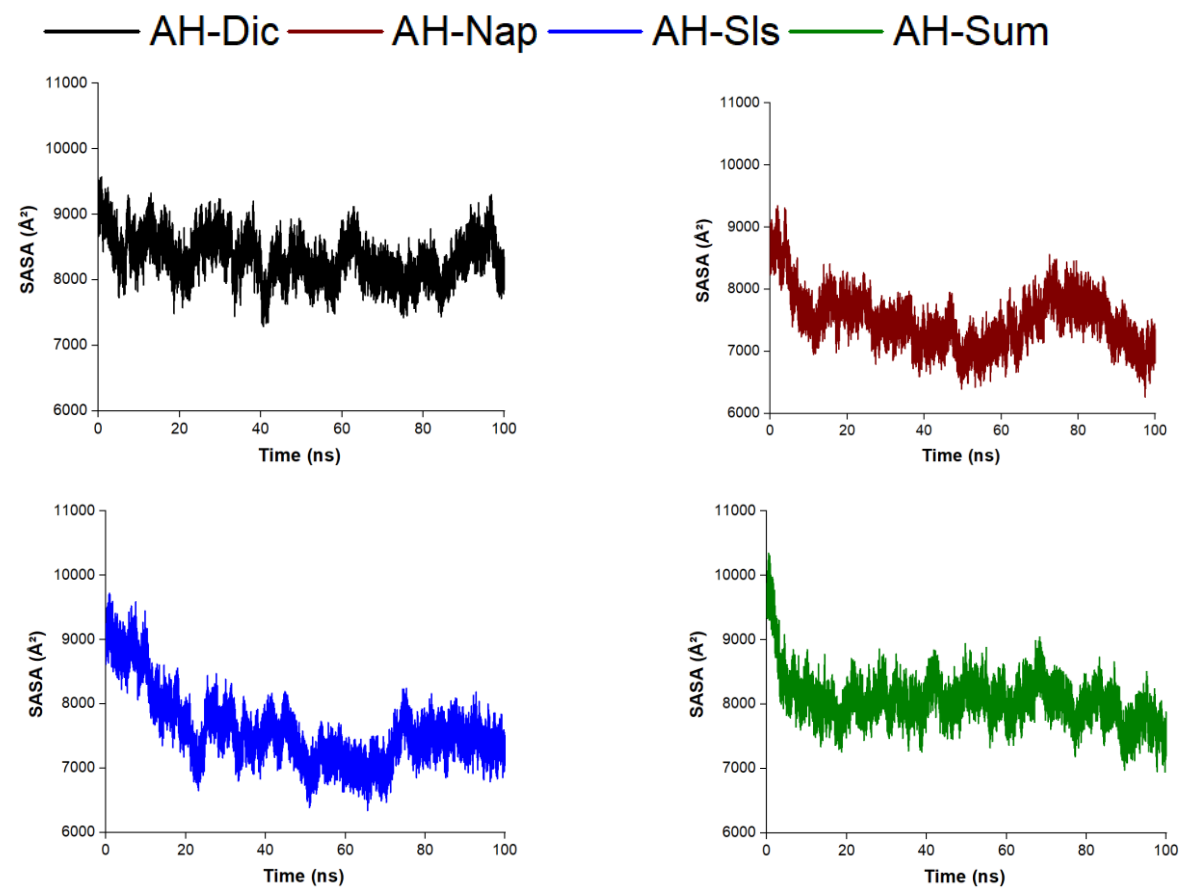

**Figure S7(d):** The stability of the various AH-pollutant complexes at 100 ns simulation time derived from the plot of SASA

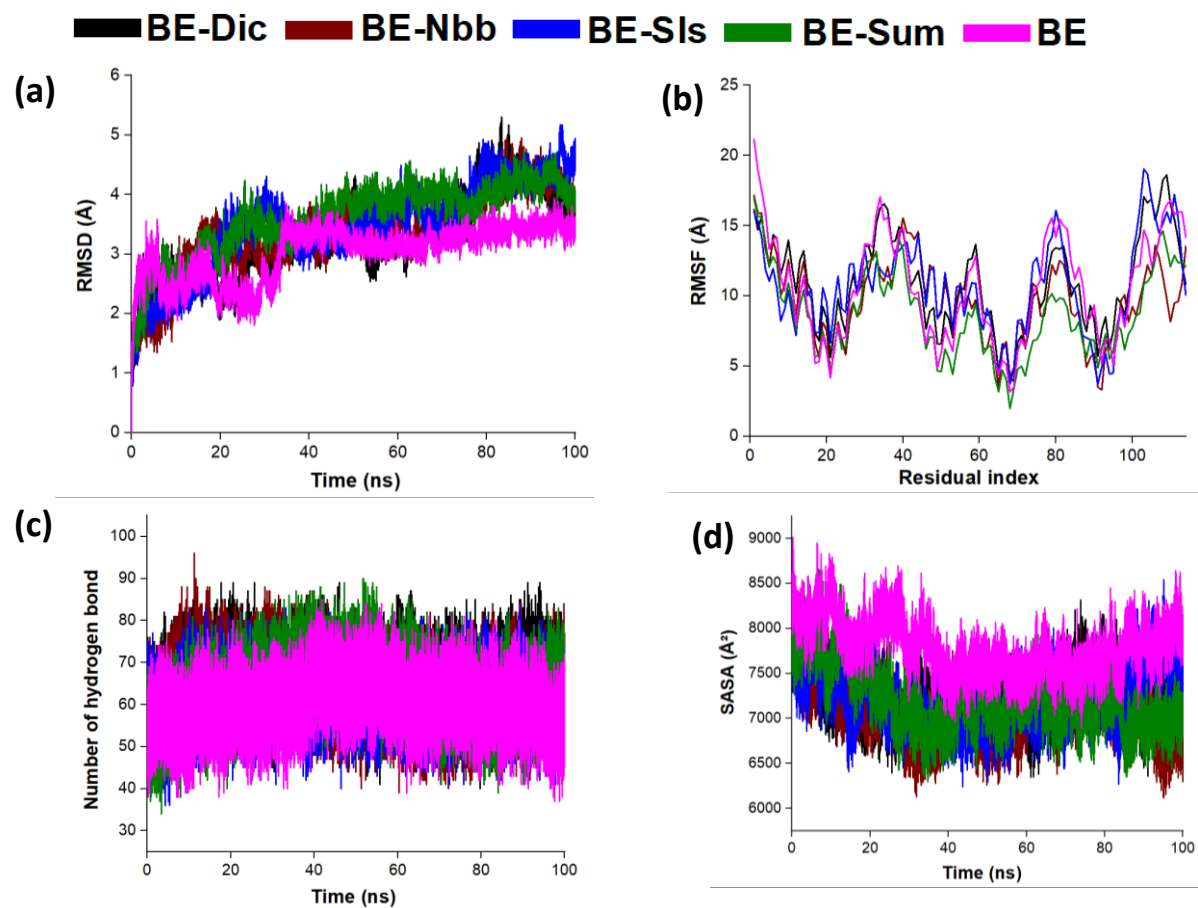

**Figure S8:** The stability of the BE protein without the ligands and the various complexes formed at 100 ns simulation time derived from the plot of (a) RMSD (Å), (b) RMSF (Å), (c) Number of hydrogen bond and (d) SASA (Å<sup>2</sup>)

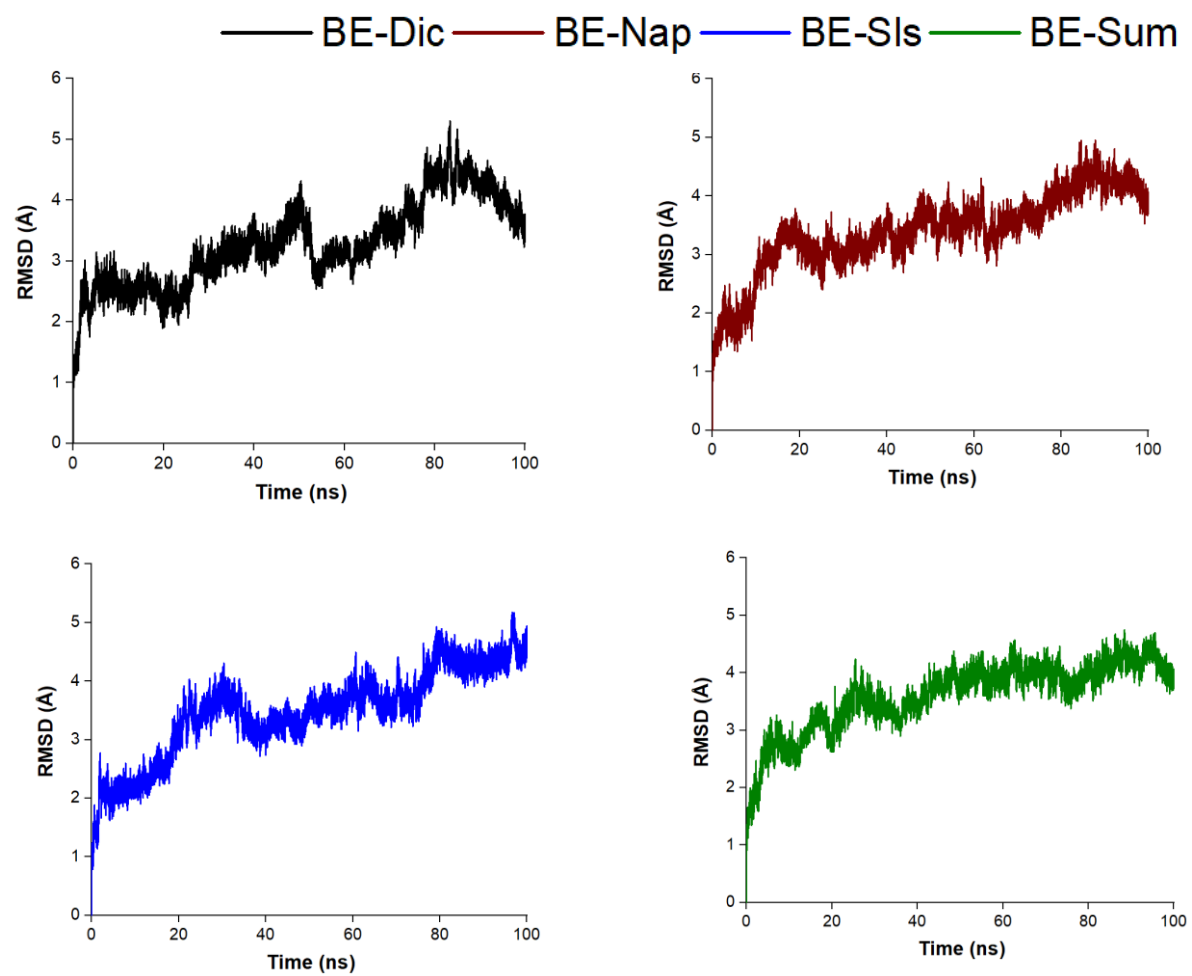

**Figure S9(a):** The stability of the various BE-pollutant complexes at 100 ns simulation time derived from the plot of RMSD

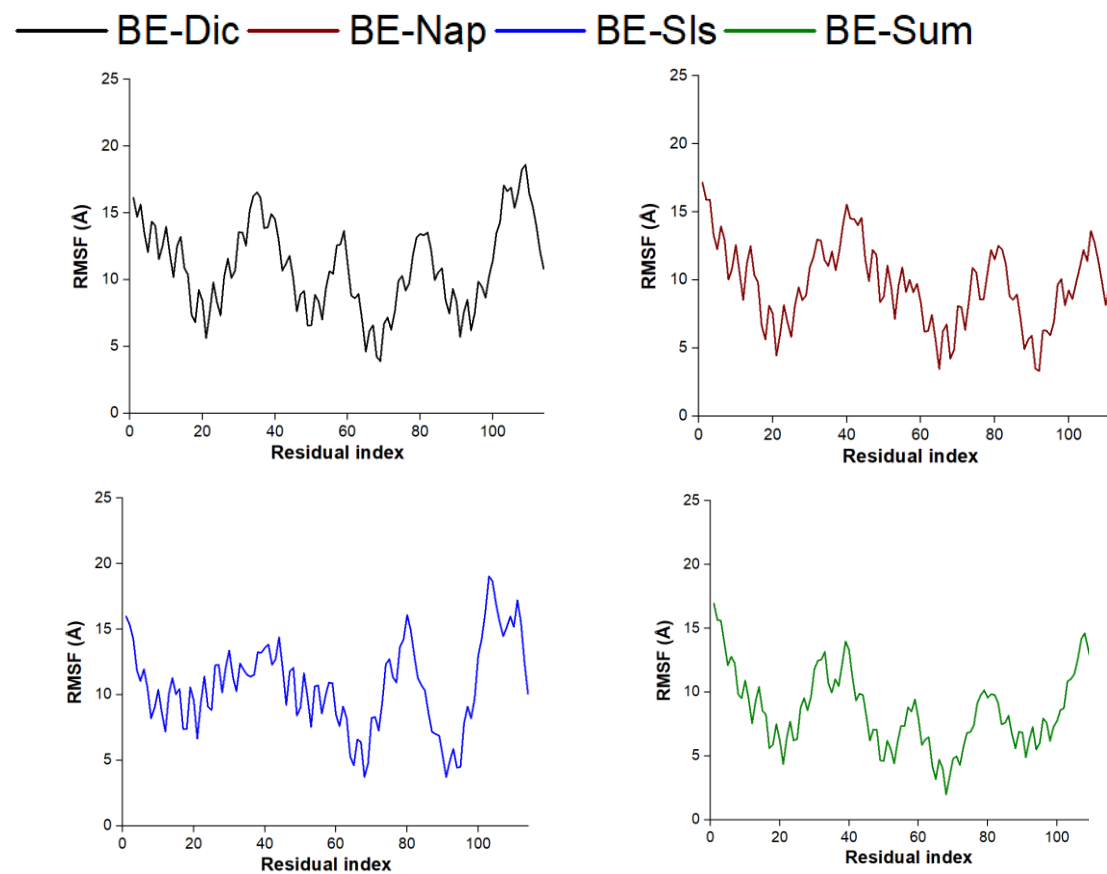

**Figure S9(b):** The stability of the various BE-pollutant complexes at 100 ns simulation time derived from the plot of RMSF

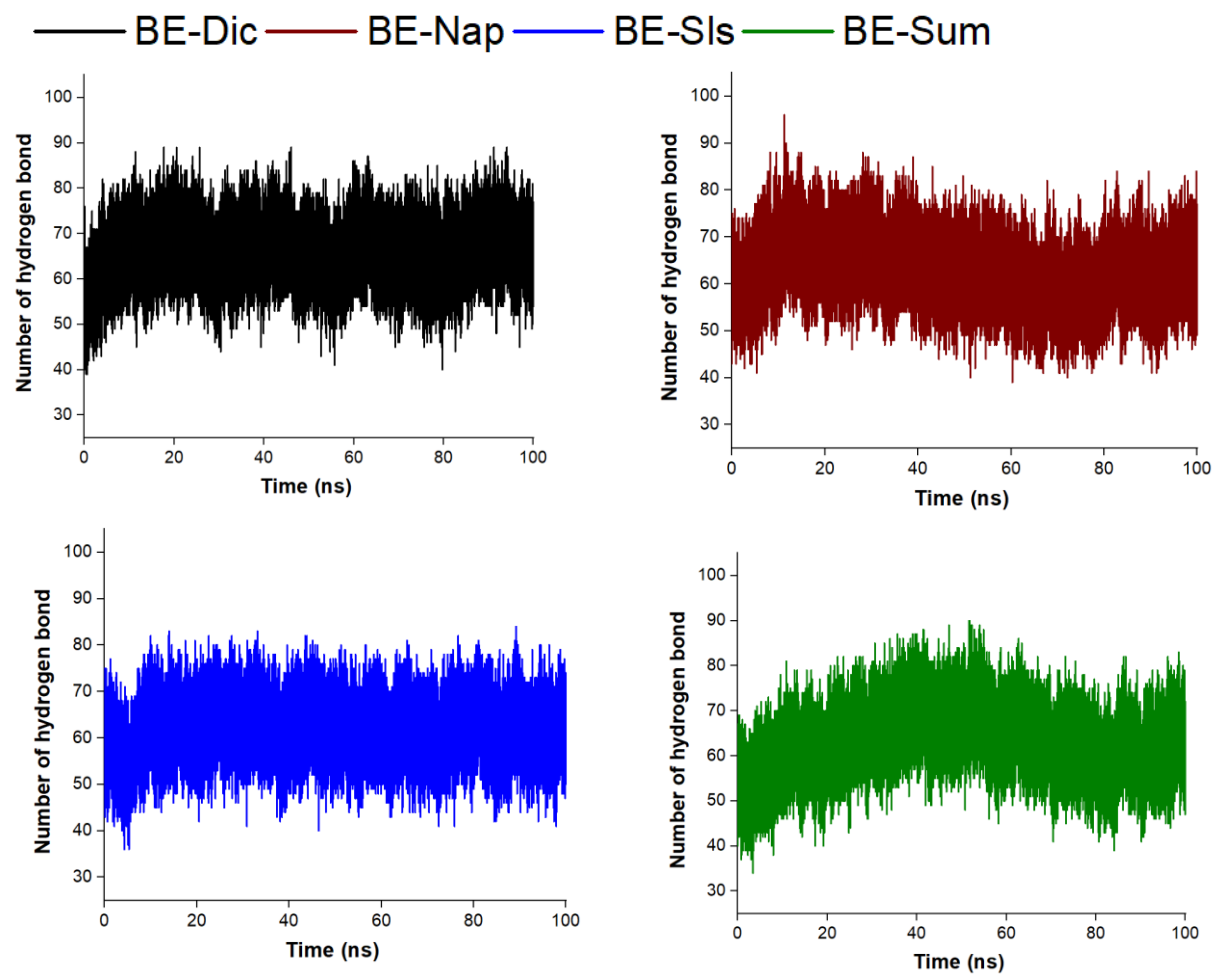

**Figure S9(c):** The stability of the various BE-pollutant complexes at 100 ns simulation time derived from the plot of number of hydrogen bond.

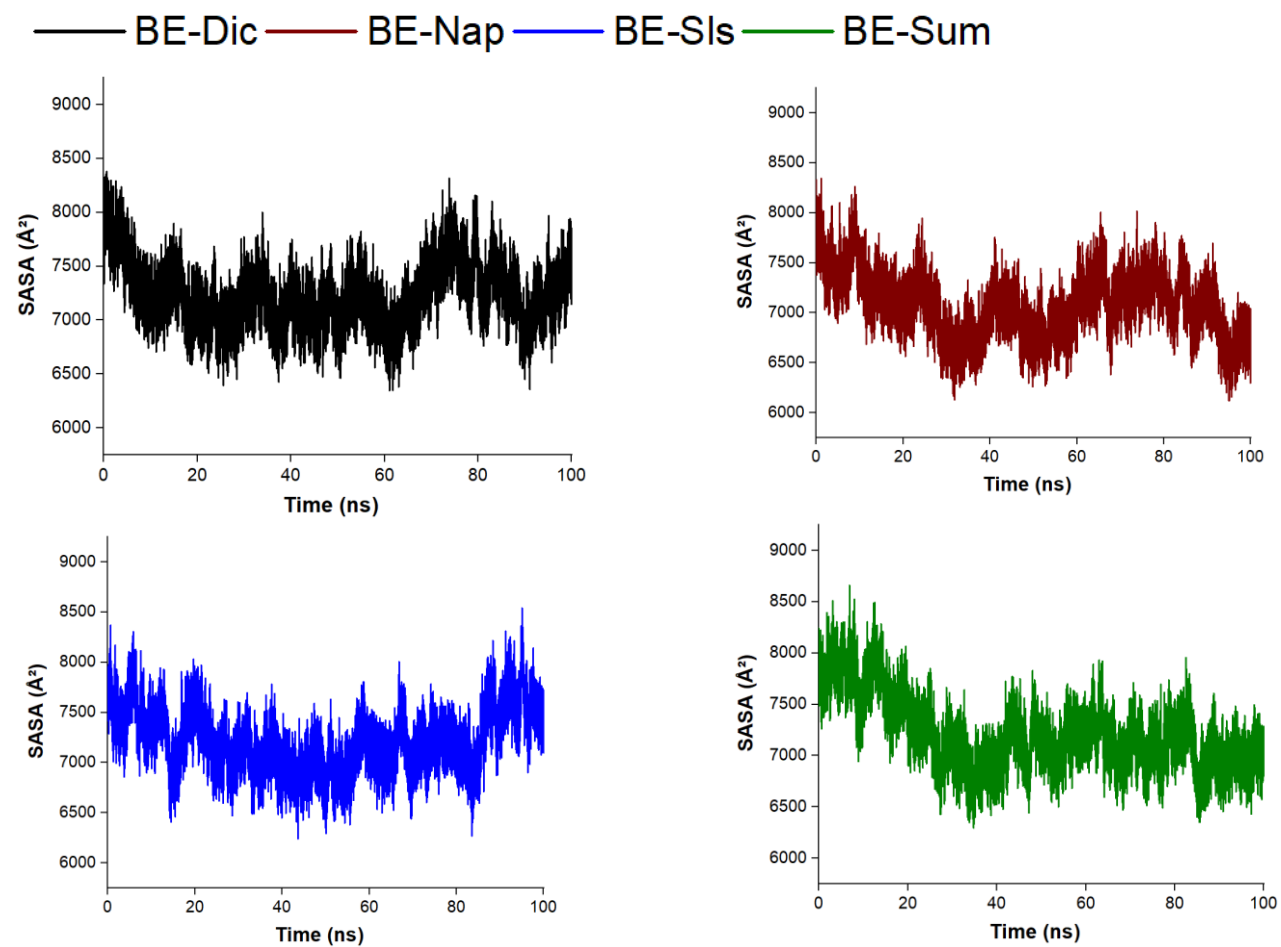

**Figure S9(d):** The stability of the various BE-pollutant complexes at 100 ns simulation time derived from the plot of SASA.

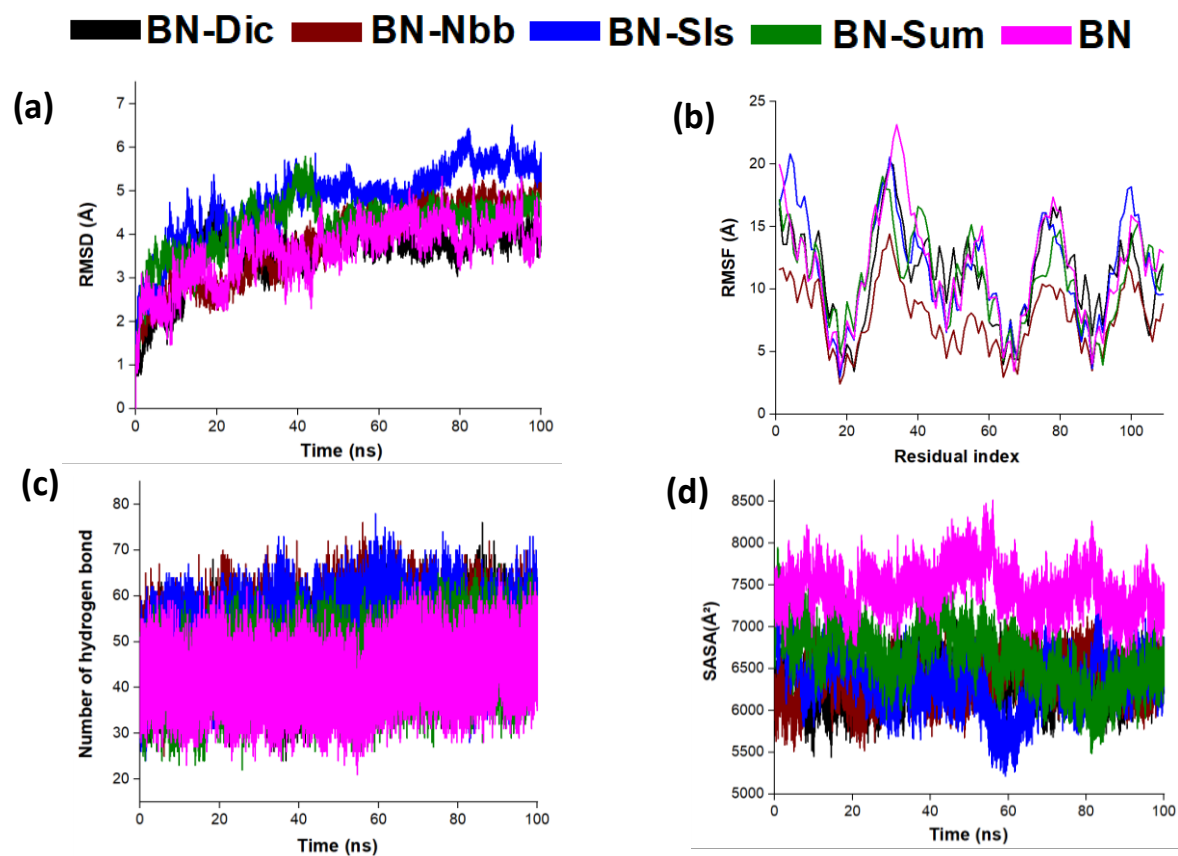

**Figure S10:** The stability of the BN protein without the ligands and the various complexes formed at 100 ns simulation time derived from the plot of (a) RMSD (Å), (b) RMSF (Å), (c) Number of hydrogen bond and (d) SASA (Å<sup>2</sup>)

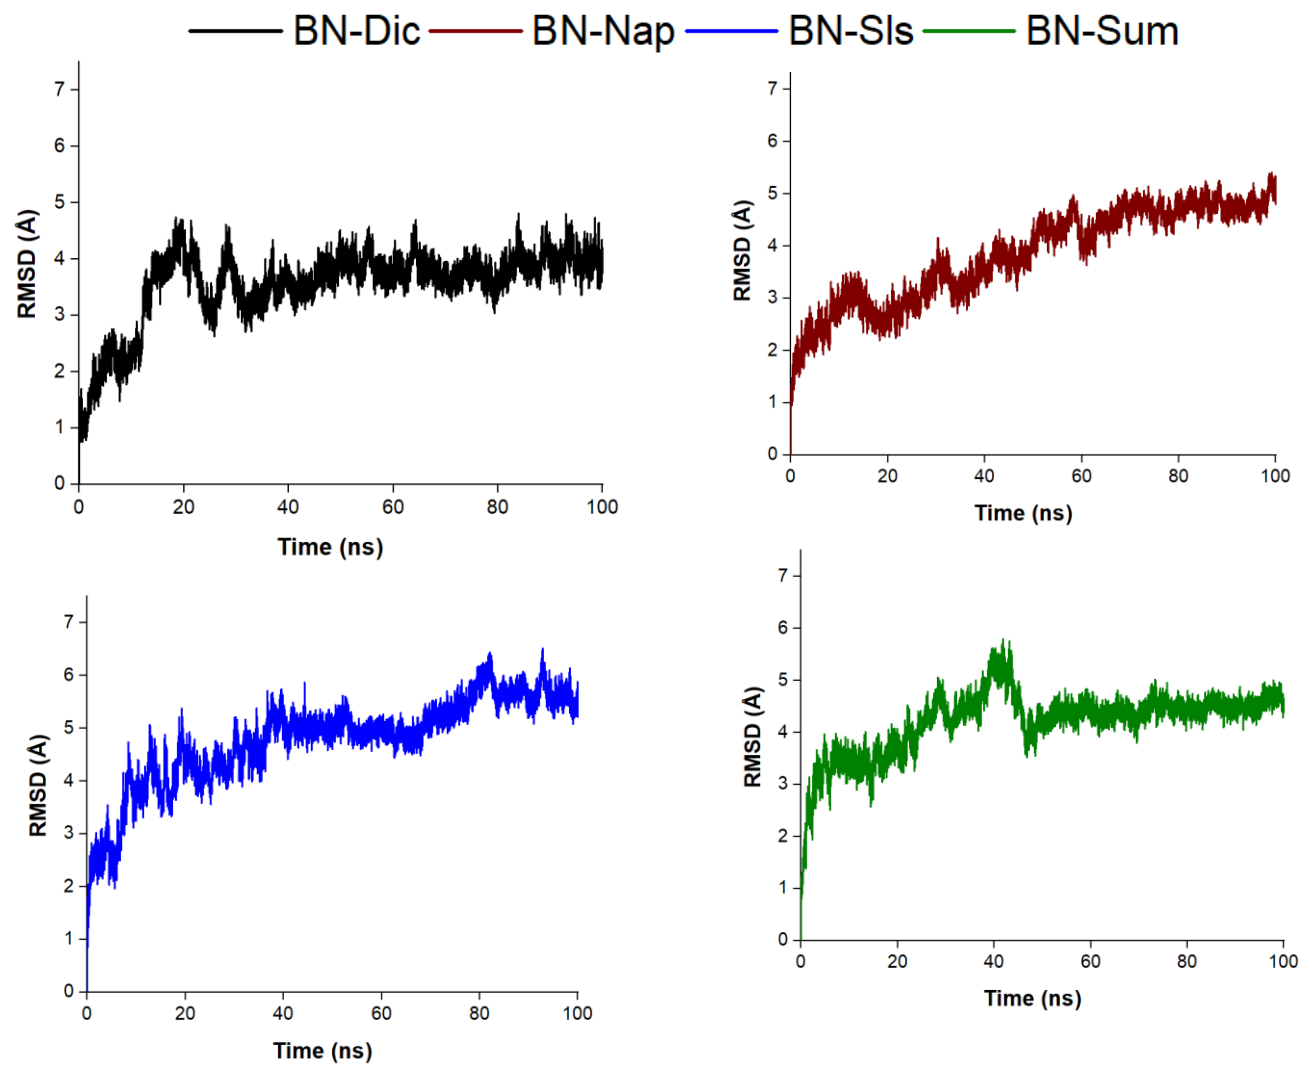

**Figure S11(a):** The stability of the various BN-pollutant complexes at 100 ns simulation time derived from the plot of RMSD.



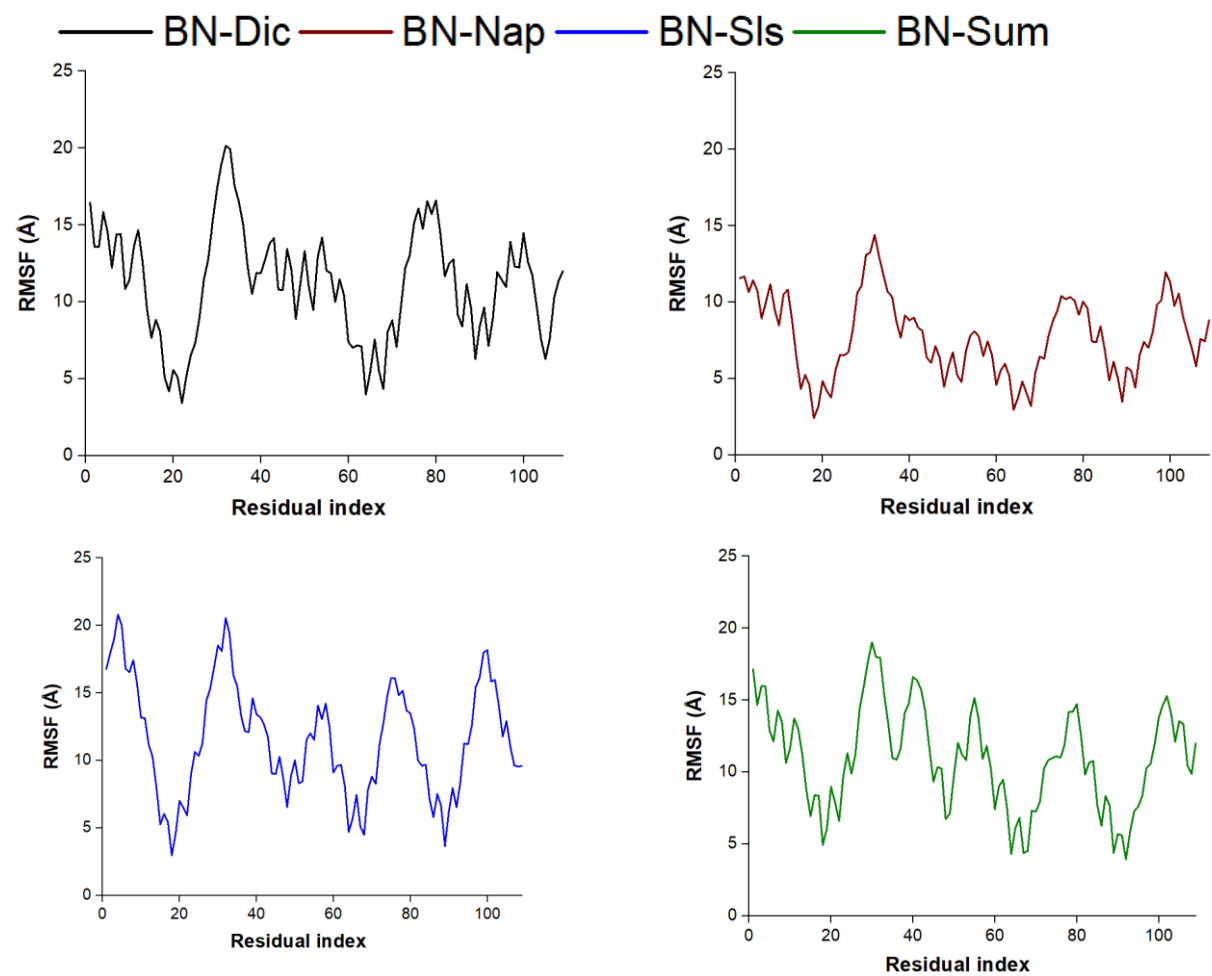

**Figure S11(b):** The stability of the various BN-pollutant complexes at 100 ns simulation time derived from the plot of RMSF.

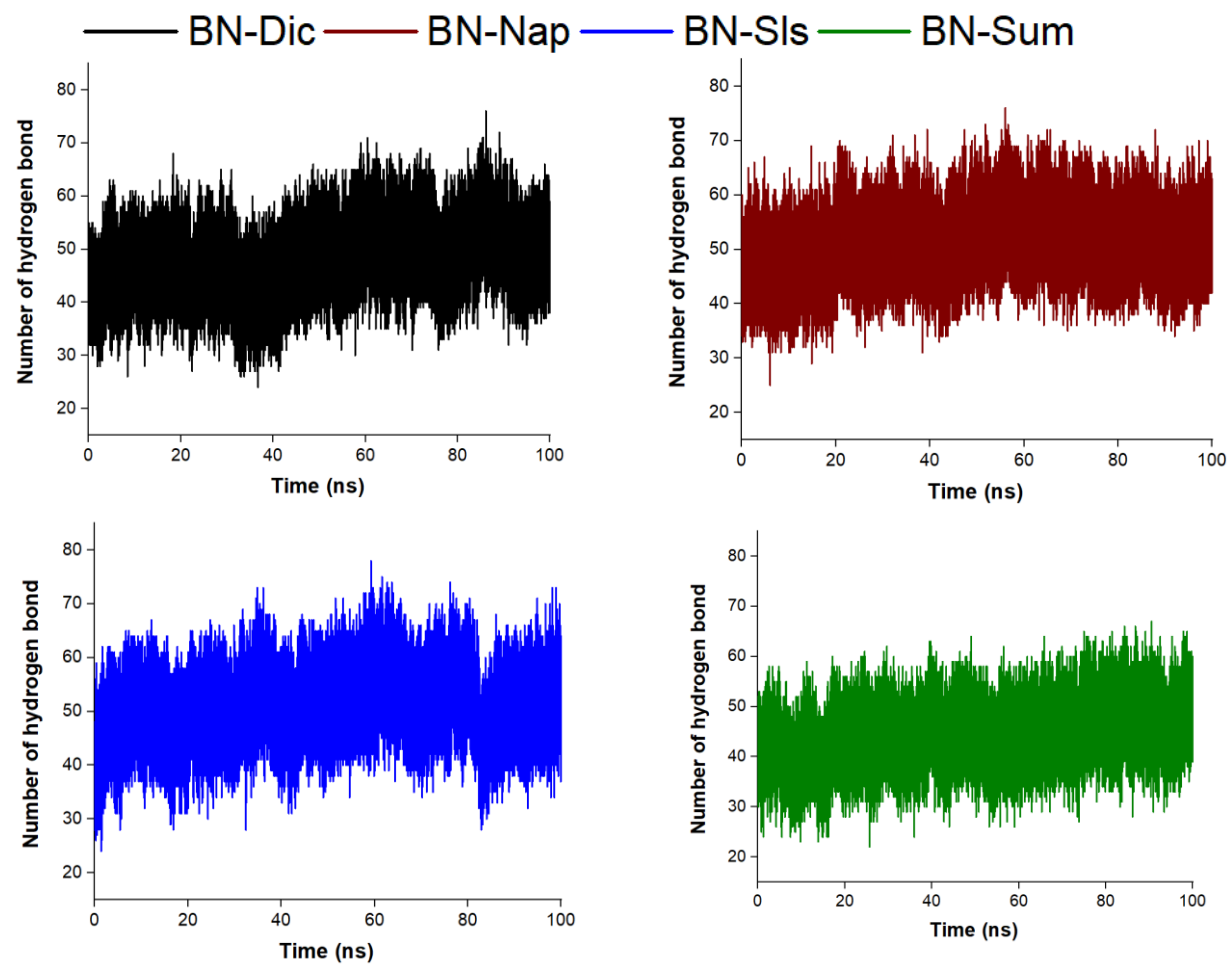

**Figure S11(c):** The stability of the various BN-pollutant complexes at 100 ns simulation time derived from the plot of number of hydrogen bond.

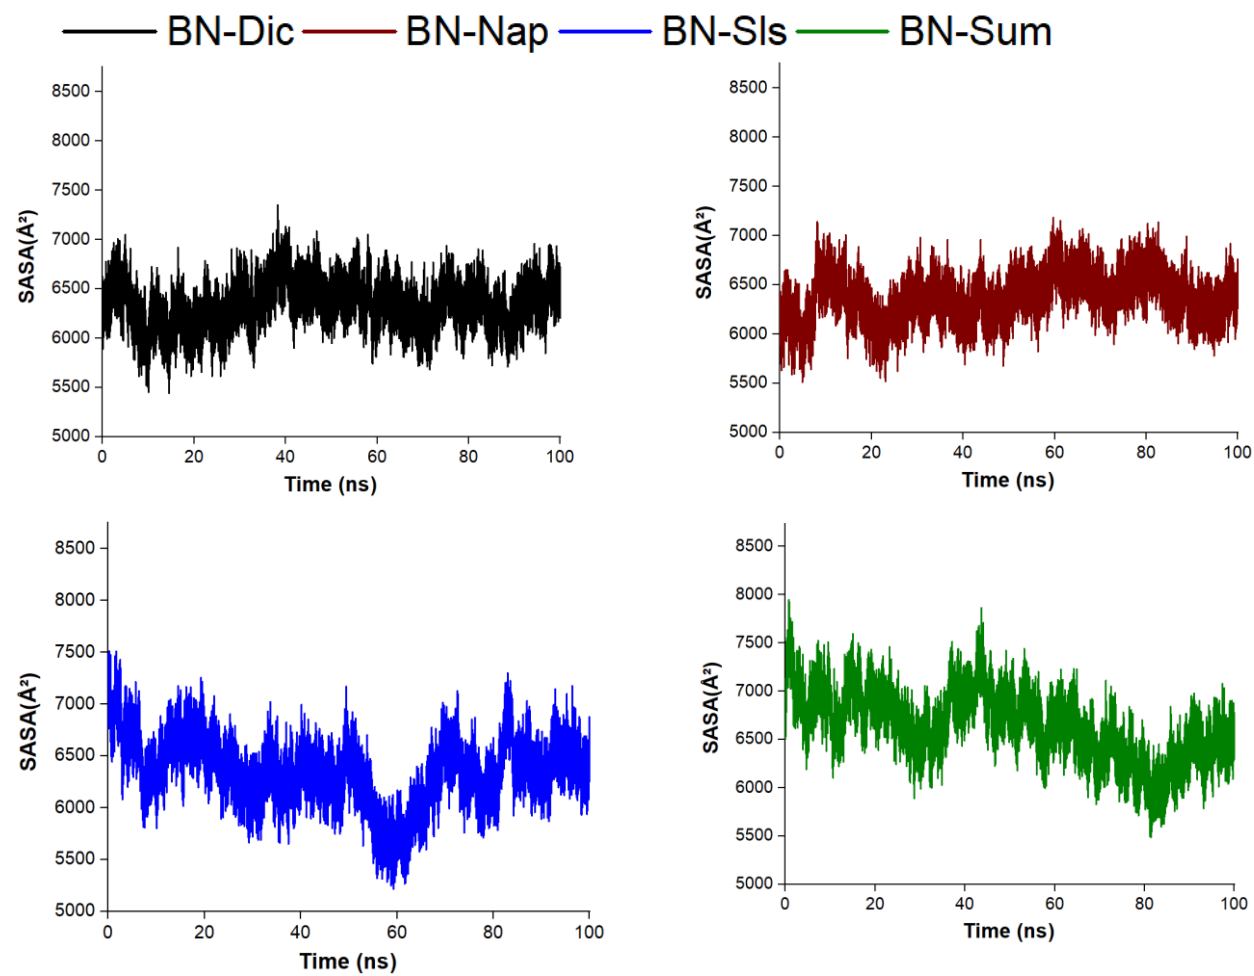

**Figure S11(d):** The stability of the various BN-pollutant complexes at 100 ns simulation time derived from the plot of SASA.

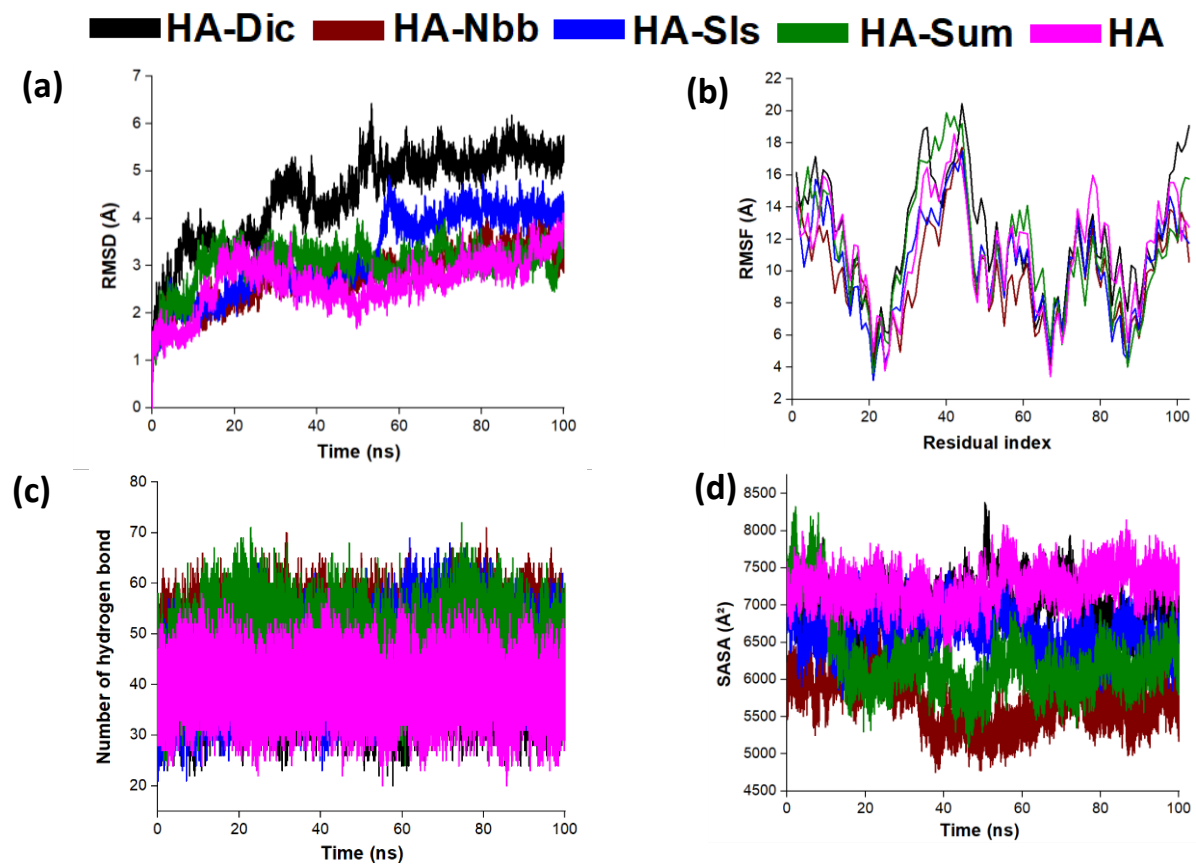

**Figure S12:** The stability of the HA protein without the ligands and the various complexes formed at 100 ns simulation time derived from the plot of (a) RMSD (Å), (b) RMSF (Å), (c) Number of hydrogen bond and (d) SASA (Å<sup>2</sup>)

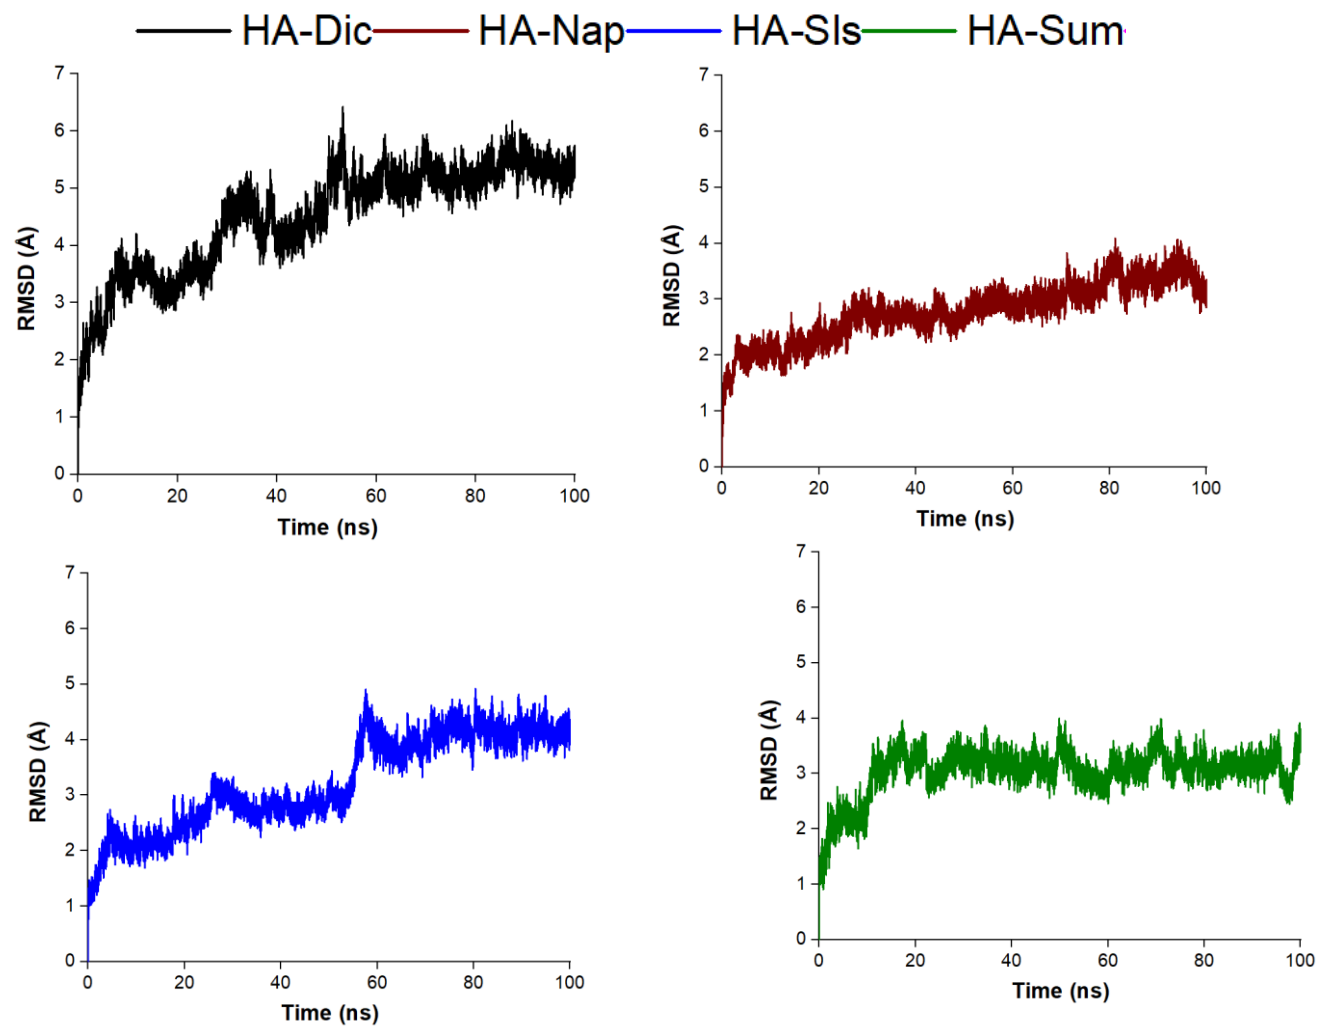

**Figure S13(a):** The stability of the various HA-pollutant complexes at 100 ns simulation time derived from the plot of RMSD.

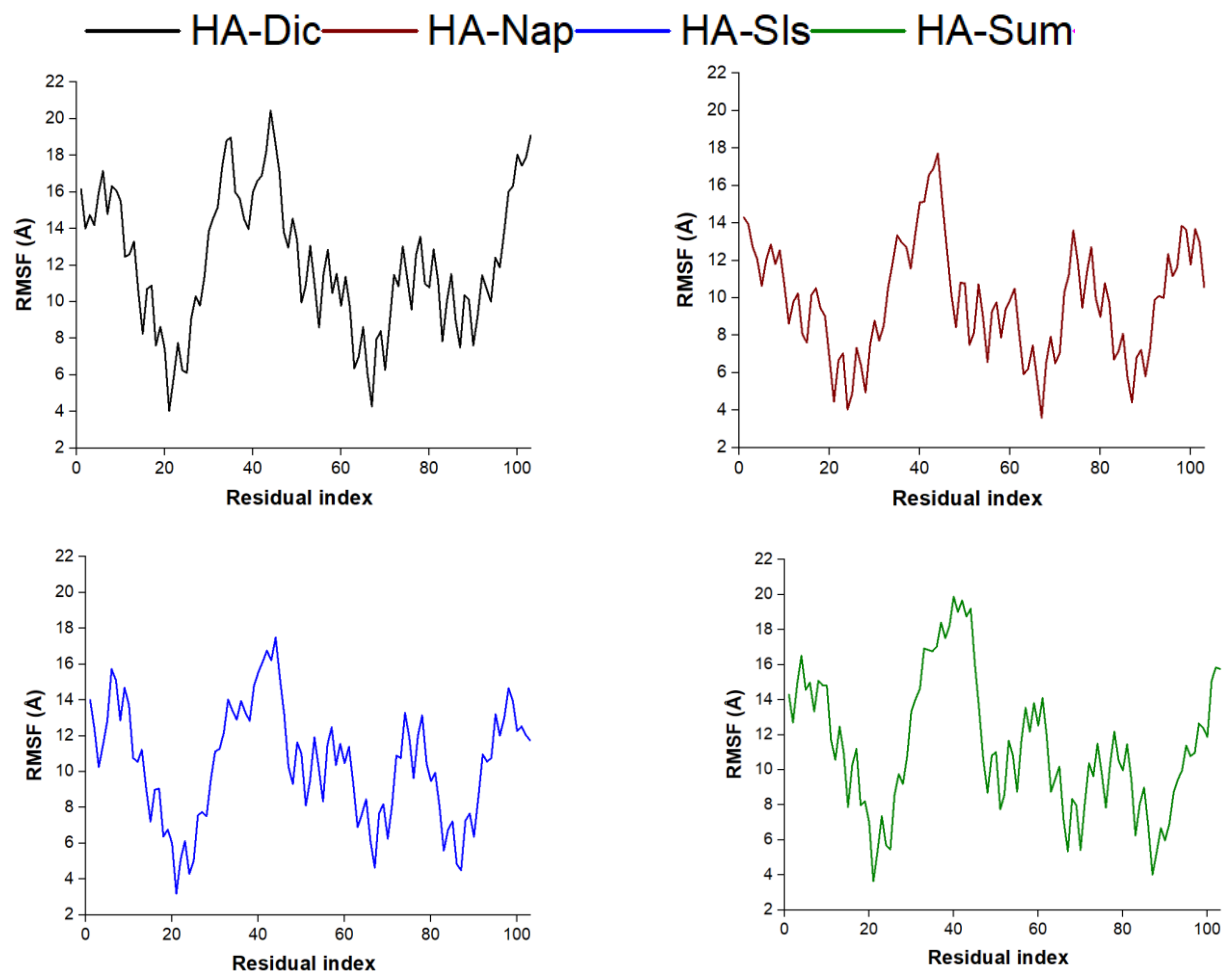

**Figure S13(b):** The stability of the various HA-pollutant complexes at 100 ns simulation time derived from the plot of RMSF.

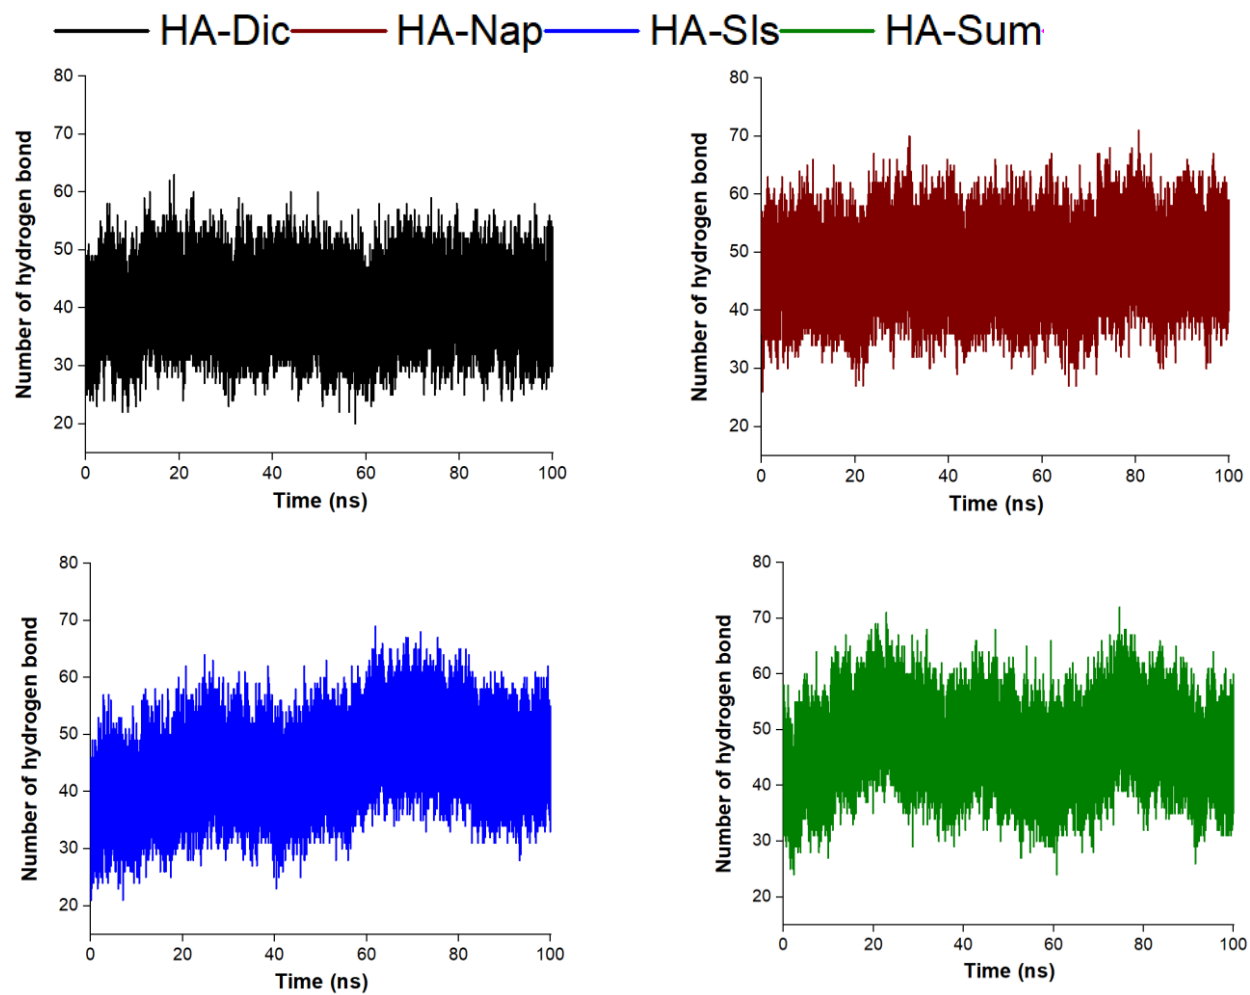

**Figure S13(c):** The stability of the various HA-pollutant complexes at 100 ns simulation time derived from the plot of number of hydrogen bond.

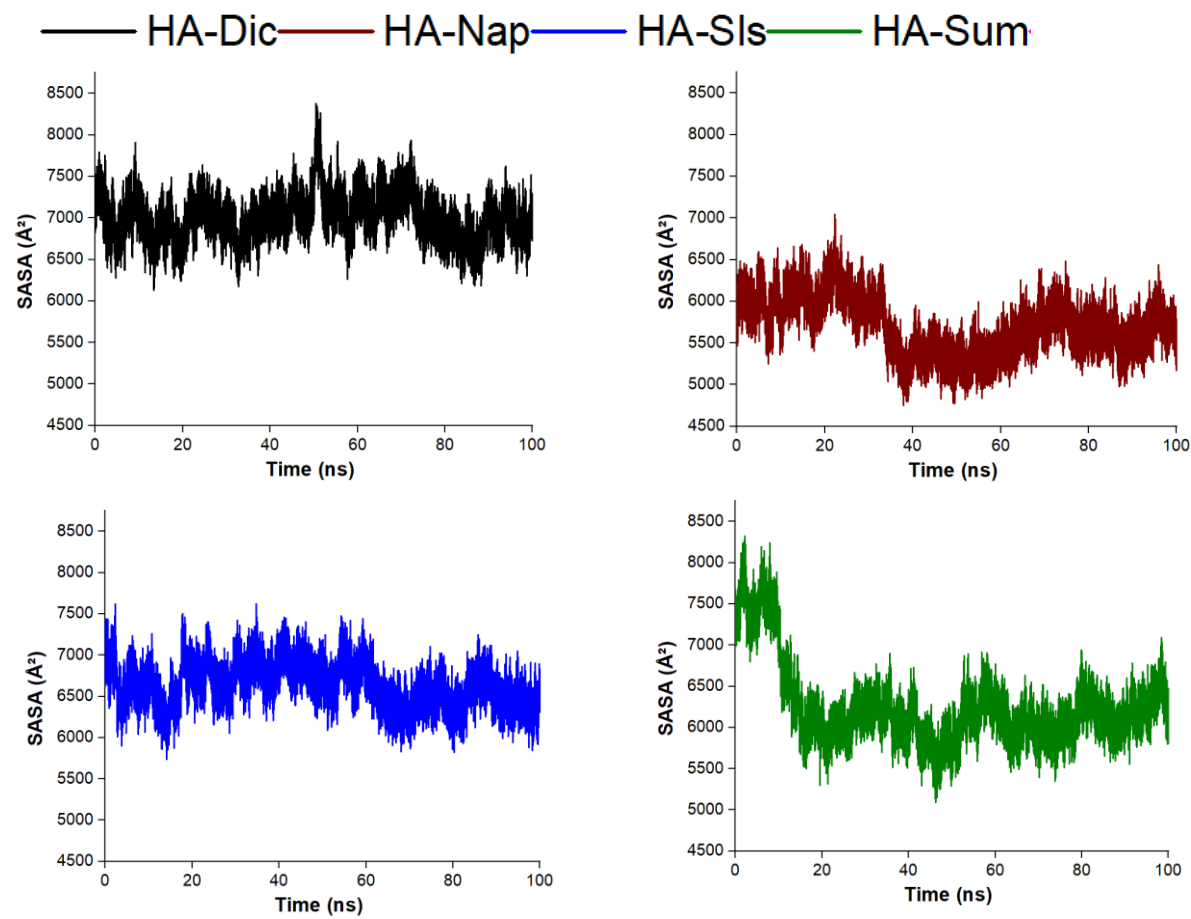

**Figure S13(d):** The stability of the various HA-pollutant complexes at 100 ns simulation time derived from the plot of SASA.



**Table A:** The number of atoms present in the system of AH-Dic

|      |    |     |     |   |        |         |        |      |      |
|------|----|-----|-----|---|--------|---------|--------|------|------|
| ATOM | 1  | N   | GLY | 1 | 21.027 | -11.862 | -0.185 | 1.00 | 0.00 |
| ATOM | 2  | H1  | GLY | 1 | 20.326 | -11.147 | -0.309 | 1.00 | 0.00 |
| ATOM | 3  | H2  | GLY | 1 | 20.642 | -12.749 | -0.477 | 1.00 | 0.00 |
| ATOM | 4  | H3  | GLY | 1 | 21.898 | -11.536 | -0.580 | 1.00 | 0.00 |
| ATOM | 5  | CA  | GLY | 1 | 21.287 | -12.007 | 1.275  | 1.00 | 0.00 |
| ATOM | 6  | HA2 | GLY | 1 | 21.055 | -13.023 | 1.596  | 1.00 | 0.00 |
| ATOM | 7  | HA3 | GLY | 1 | 22.333 | -11.789 | 1.491  | 1.00 | 0.00 |
| ATOM | 8  | C   | GLY | 1 | 20.403 | -11.026 | 2.049  | 1.00 | 0.00 |
| ATOM | 9  | O   | GLY | 1 | 20.874 | -10.037 | 2.576  | 1.00 | 0.00 |
| ATOM | 10 | N   | PRO | 2 | 19.096 | -11.311 | 2.115  | 1.00 | 0.00 |
| ATOM | 11 | CD  | PRO | 2 | 18.453 | -12.487 | 1.503  | 1.00 | 0.00 |
| ATOM | 12 | HD2 | PRO | 2 | 19.014 | -13.385 | 1.764  | 1.00 | 0.00 |
| ATOM | 13 | HD3 | PRO | 2 | 18.439 | -12.371 | 0.419  | 1.00 | 0.00 |
| ATOM | 14 | CG  | PRO | 2 | 17.074 | -12.474 | 2.098  | 1.00 | 0.00 |
| ATOM | 15 | HG2 | PRO | 2 | 17.058 | -13.108 | 2.985  | 1.00 | 0.00 |
| ATOM | 16 | HG3 | PRO | 2 | 16.362 | -12.856 | 1.367  | 1.00 | 0.00 |
| ATOM | 17 | CB  | PRO | 2 | 16.778 | -11.053 | 2.438  | 1.00 | 0.00 |
| ATOM | 18 | HB2 | PRO | 2 | 16.109 | -11.039 | 3.298  | 1.00 | 0.00 |
| ATOM | 19 | HB3 | PRO | 2 | 16.337 | -10.476 | 1.625  | 1.00 | 0.00 |

|      |    |     |     |   |        |         |       |      |      |
|------|----|-----|-----|---|--------|---------|-------|------|------|
| ATOM | 20 | CA  | PRO | 2 | 18.132 | -10.459 | 2.824 | 1.00 | 0.00 |
| ATOM | 21 | HA  | PRO | 2 | 18.271 | -9.432  | 2.488 | 1.00 | 0.00 |
| ATOM | 22 | C   | PRO | 2 | 18.321 | -10.529 | 4.342 | 1.00 | 0.00 |
| ATOM | 23 | O   | PRO | 2 | 17.876 | -9.666  | 5.073 | 1.00 | 0.00 |
| ATOM | 24 | N   | MET | 3 | 18.977 | -11.550 | 4.821 | 1.00 | 0.00 |
| ATOM | 25 | H   | MET | 3 | 19.350 | -12.272 | 4.220 | 1.00 | 0.00 |
| ATOM | 26 | CA  | MET | 3 | 19.192 | -11.673 | 6.291 | 1.00 | 0.00 |
| ATOM | 27 | HA  | MET | 3 | 18.236 | -11.761 | 6.807 | 1.00 | 0.00 |
| ATOM | 28 | CB  | MET | 3 | 20.021 | -12.926 | 6.581 | 1.00 | 0.00 |
| ATOM | 29 | HB2 | MET | 3 | 20.954 | -12.884 | 6.018 | 1.00 | 0.00 |
| ATOM | 30 | HB3 | MET | 3 | 20.243 | -12.978 | 7.647 | 1.00 | 0.00 |
| ATOM | 31 | CG  | MET | 3 | 19.230 | -14.168 | 6.164 | 1.00 | 0.00 |
| ATOM | 32 | HG2 | MET | 3 | 19.043 | -14.143 | 5.090 | 1.00 | 0.00 |
| ATOM | 33 | HG3 | MET | 3 | 19.796 | -15.066 | 6.413 | 1.00 | 0.00 |
| ATOM | 34 | SD  | MET | 3 | 17.648 | -14.199 | 7.043 | 1.00 | 0.00 |
| ATOM | 35 | CE  | MET | 3 | 18.322 | -14.277 | 8.721 | 1.00 | 0.00 |
| ATOM | 36 | HE1 | MET | 3 | 18.939 | -13.398 | 8.907 | 1.00 | 0.00 |
| ATOM | 37 | HE2 | MET | 3 | 17.504 | -14.305 | 9.441 | 1.00 | 0.00 |
| ATOM | 38 | HE3 | MET | 3 | 18.930 | -15.176 | 8.828 | 1.00 | 0.00 |
| ATOM | 39 | C   | MET | 3 | 19.936 | -10.438 | 6.802 | 1.00 | 0.00 |

|      |    |      |     |   |        |         |       |      |      |
|------|----|------|-----|---|--------|---------|-------|------|------|
| ATOM | 40 | O    | MET | 3 | 19.690 | -9.960  | 7.892 | 1.00 | 0.00 |
| ATOM | 41 | N    | ARG | 4 | 20.846 | -9.917  | 6.024 | 1.00 | 0.00 |
| ATOM | 42 | H    | ARG | 4 | 21.058 | -10.310 | 5.118 | 1.00 | 0.00 |
| ATOM | 43 | CA   | ARG | 4 | 21.603 | -8.713  | 6.466 | 1.00 | 0.00 |
| ATOM | 44 | HA   | ARG | 4 | 22.187 | -8.941  | 7.358 | 1.00 | 0.00 |
| ATOM | 45 | CB   | ARG | 4 | 22.558 | -8.273  | 5.355 | 1.00 | 0.00 |
| ATOM | 46 | HB2  | ARG | 4 | 21.995 | -8.106  | 4.437 | 1.00 | 0.00 |
| ATOM | 47 | HB3  | ARG | 4 | 23.056 | -7.349  | 5.649 | 1.00 | 0.00 |
| ATOM | 48 | CG   | ARG | 4 | 23.605 | -9.363  | 5.119 | 1.00 | 0.00 |
| ATOM | 49 | HG2  | ARG | 4 | 24.110 | -9.592  | 6.057 | 1.00 | 0.00 |
| ATOM | 50 | HG3  | ARG | 4 | 23.117 | -10.262 | 4.742 | 1.00 | 0.00 |
| ATOM | 51 | CD   | ARG | 4 | 24.630 | -8.872  | 4.095 | 1.00 | 0.00 |
| ATOM | 52 | HD2  | ARG | 4 | 25.152 | -7.994  | 4.475 | 1.00 | 0.00 |
| ATOM | 53 | HD3  | ARG | 4 | 25.353 | -9.659  | 3.878 | 1.00 | 0.00 |
| ATOM | 54 | NE   | ARG | 4 | 23.933 | -8.503  | 2.832 | 1.00 | 0.00 |
| ATOM | 55 | HE   | ARG | 4 | 23.586 | -9.208  | 2.197 | 1.00 | 0.00 |
| ATOM | 56 | CZ   | ARG | 4 | 23.759 | -7.246  | 2.524 | 1.00 | 0.00 |
| ATOM | 57 | NH1  | ARG | 4 | 24.758 | -6.410  | 2.608 | 1.00 | 0.00 |
| ATOM | 58 | HH11 | ARG | 4 | 25.664 | -6.739  | 2.911 | 1.00 | 0.00 |
| ATOM | 59 | HH12 | ARG | 4 | 24.621 | -5.439  | 2.369 | 1.00 | 0.00 |

|      |    |      |     |   |        |        |       |      |      |
|------|----|------|-----|---|--------|--------|-------|------|------|
| ATOM | 60 | NH2  | ARG | 4 | 22.588 | -6.825 | 2.133 | 1.00 | 0.00 |
| ATOM | 61 | HH21 | ARG | 4 | 21.817 | -7.475 | 2.069 | 1.00 | 0.00 |
| ATOM | 62 | HH22 | ARG | 4 | 22.458 | -5.852 | 1.896 | 1.00 | 0.00 |
| ATOM | 63 | C    | ARG | 4 | 20.624 | -7.579 | 6.774 | 1.00 | 0.00 |
| ATOM | 64 | O    | ARG | 4 | 20.819 | -6.809 | 7.693 | 1.00 | 0.00 |
| ATOM | 65 | N    | ARG | 5 | 19.570 | -7.470 | 6.011 | 1.00 | 0.00 |
| ATOM | 66 | H    | ARG | 5 | 19.402 | -8.106 | 5.244 | 1.00 | 0.00 |
| ATOM | 67 | CA   | ARG | 5 | 18.579 | -6.386 | 6.261 | 1.00 | 0.00 |
| ATOM | 68 | HA   | ARG | 5 | 19.051 | -5.410 | 6.154 | 1.00 | 0.00 |
| ATOM | 69 | CB   | ARG | 5 | 17.440 | -6.493 | 5.244 | 1.00 | 0.00 |
| ATOM | 70 | HB2  | ARG | 5 | 16.988 | -7.483 | 5.307 | 1.00 | 0.00 |
| ATOM | 71 | HB3  | ARG | 5 | 16.687 | -5.735 | 5.460 | 1.00 | 0.00 |
| ATOM | 72 | CG   | ARG | 5 | 17.993 | -6.275 | 3.834 | 1.00 | 0.00 |
| ATOM | 73 | HG2  | ARG | 5 | 18.505 | -5.314 | 3.788 | 1.00 | 0.00 |
| ATOM | 74 | HG3  | ARG | 5 | 18.696 | -7.073 | 3.591 | 1.00 | 0.00 |
| ATOM | 75 | CD   | ARG | 5 | 16.841 | -6.287 | 2.828 | 1.00 | 0.00 |
| ATOM | 76 | HD2  | ARG | 5 | 16.243 | -7.190 | 2.950 | 1.00 | 0.00 |
| ATOM | 77 | HD3  | ARG | 5 | 16.209 | -5.411 | 2.968 | 1.00 | 0.00 |
| ATOM | 78 | NE   | ARG | 5 | 17.391 | -6.263 | 1.443 | 1.00 | 0.00 |
| ATOM | 79 | HE   | ARG | 5 | 17.918 | -5.474 | 1.098 | 1.00 | 0.00 |

|      |    |      |     |   |        |         |        |      |      |
|------|----|------|-----|---|--------|---------|--------|------|------|
| ATOM | 80 | CZ   | ARG | 5 | 17.196 | -7.278  | 0.646  | 1.00 | 0.00 |
| ATOM | 81 | NH1  | ARG | 5 | 15.995 | -7.765  | 0.490  | 1.00 | 0.00 |
| ATOM | 82 | HH11 | ARG | 5 | 15.218 | -7.354  | 0.988  | 1.00 | 0.00 |
| ATOM | 83 | HH12 | ARG | 5 | 15.848 | -8.551  | -0.128 | 1.00 | 0.00 |
| ATOM | 84 | NH2  | ARG | 5 | 18.202 | -7.806  | 0.005  | 1.00 | 0.00 |
| ATOM | 85 | HH21 | ARG | 5 | 19.130 | -7.427  | 0.128  | 1.00 | 0.00 |
| ATOM | 86 | HH22 | ARG | 5 | 18.048 | -8.592  | -0.611 | 1.00 | 0.00 |
| ATOM | 87 | C    | ARG | 5 | 18.015 | -6.524  | 7.676  | 1.00 | 0.00 |
| ATOM | 88 | O    | ARG | 5 | 17.663 | -5.550  | 8.311  | 1.00 | 0.00 |
| ATOM | 89 | N    | GLU | 6 | 17.925 | -7.727  | 8.174  | 1.00 | 0.00 |
| ATOM | 90 | H    | GLU | 6 | 18.215 | -8.542  | 7.651  | 1.00 | 0.00 |
| ATOM | 91 | CA   | GLU | 6 | 17.383 | -7.925  | 9.548  | 1.00 | 0.00 |
| ATOM | 92 | HA   | GLU | 6 | 16.359 | -7.557  | 9.607  | 1.00 | 0.00 |
| ATOM | 93 | CB   | GLU | 6 | 17.387 | -9.417  | 9.889  | 1.00 | 0.00 |
| ATOM | 94 | HB2  | GLU | 6 | 18.398 | -9.812  | 9.784  | 1.00 | 0.00 |
| ATOM | 95 | HB3  | GLU | 6 | 17.048 | -9.557  | 10.916 | 1.00 | 0.00 |
| ATOM | 96 | CG   | GLU | 6 | 16.448 | -10.160 | 8.937  | 1.00 | 0.00 |
| ATOM | 97 | HG2  | GLU | 6 | 15.443 | -9.747  | 9.018  | 1.00 | 0.00 |
| ATOM | 98 | HG3  | GLU | 6 | 16.805 | -10.047 | 7.913  | 1.00 | 0.00 |
| ATOM | 99 | CD   | GLU | 6 | 16.420 | -11.644 | 9.305  | 1.00 | 0.00 |

|      |     |     |     |   |        |         |        |      |      |
|------|-----|-----|-----|---|--------|---------|--------|------|------|
| ATOM | 100 | OE1 | GLU | 6 | 17.218 | -12.045 | 10.136 | 1.00 | 0.00 |
| ATOM | 101 | OE2 | GLU | 6 | 15.598 | -12.356 | 8.750  | 1.00 | 0.00 |
| ATOM | 102 | C   | GLU | 6 | 18.255 | -7.169  | 10.553 | 1.00 | 0.00 |
| ATOM | 103 | O   | GLU | 6 | 17.780 | -6.692  | 11.565 | 1.00 | 0.00 |
| ATOM | 104 | N   | ARG | 7 | 19.526 | -7.055  | 10.283 | 1.00 | 0.00 |
| ATOM | 105 | H   | ARG | 7 | 19.928 | -7.450  | 9.444  | 1.00 | 0.00 |
| ATOM | 106 | CA  | ARG | 7 | 20.425 | -6.329  | 11.223 | 1.00 | 0.00 |
| ATOM | 107 | HA  | ARG | 7 | 20.527 | -6.886  | 12.154 | 1.00 | 0.00 |
| ATOM | 108 | CB  | ARG | 7 | 21.810 | -6.176  | 10.591 | 1.00 | 0.00 |
| ATOM | 109 | HB2 | ARG | 7 | 22.181 | -7.155  | 10.287 | 1.00 | 0.00 |
| ATOM | 110 | HB3 | ARG | 7 | 21.742 | -5.527  | 9.718  | 1.00 | 0.00 |
| ATOM | 111 | CG  | ARG | 7 | 22.771 | -5.561  | 11.610 | 1.00 | 0.00 |
| ATOM | 112 | HG2 | ARG | 7 | 22.383 | -4.598  | 11.941 | 1.00 | 0.00 |
| ATOM | 113 | HG3 | ARG | 7 | 22.868 | -6.228  | 12.467 | 1.00 | 0.00 |
| ATOM | 114 | CD  | ARG | 7 | 24.143 | -5.362  | 10.962 | 1.00 | 0.00 |
| ATOM | 115 | HD2 | ARG | 7 | 24.505 | -6.303  | 10.547 | 1.00 | 0.00 |
| ATOM | 116 | HD3 | ARG | 7 | 24.082 | -4.616  | 10.170 | 1.00 | 0.00 |
| ATOM | 117 | NE  | ARG | 7 | 25.113 | -4.889  | 11.990 | 1.00 | 0.00 |
| ATOM | 118 | HE  | ARG | 7 | 25.541 | -5.528  | 12.646 | 1.00 | 0.00 |
| ATOM | 119 | CZ  | ARG | 7 | 25.427 | -3.624  | 12.057 | 1.00 | 0.00 |

|      |     |      |     |   |        |        |        |      |      |
|------|-----|------|-----|---|--------|--------|--------|------|------|
| ATOM | 120 | NH1  | ARG | 7 | 24.836 | -2.851 | 12.926 | 1.00 | 0.00 |
| ATOM | 121 | HH11 | ARG | 7 | 24.137 | -3.235 | 13.545 | 1.00 | 0.00 |
| ATOM | 122 | HH12 | ARG | 7 | 25.081 | -1.873 | 12.976 | 1.00 | 0.00 |
| ATOM | 123 | NH2  | ARG | 7 | 26.332 | -3.133 | 11.255 | 1.00 | 0.00 |
| ATOM | 124 | HH21 | ARG | 7 | 26.788 | -3.735 | 10.584 | 1.00 | 0.00 |
| ATOM | 125 | HH22 | ARG | 7 | 26.573 | -2.154 | 11.309 | 1.00 | 0.00 |
| ATOM | 126 | C    | ARG | 7 | 19.844 | -4.945 | 11.518 | 1.00 | 0.00 |
| ATOM | 127 | O    | ARG | 7 | 19.865 | -4.476 | 12.639 | 1.00 | 0.00 |
| ATOM | 128 | N    | GLY | 8 | 19.323 | -4.286 | 10.519 | 1.00 | 0.00 |
| ATOM | 129 | H    | GLY | 8 | 19.301 | -4.669 | 9.585  | 1.00 | 0.00 |
| ATOM | 130 | CA   | GLY | 8 | 18.741 | -2.932 | 10.742 | 1.00 | 0.00 |
| ATOM | 131 | HA2  | GLY | 8 | 19.517 | -2.244 | 11.076 | 1.00 | 0.00 |
| ATOM | 132 | HA3  | GLY | 8 | 18.299 | -2.560 | 9.818  | 1.00 | 0.00 |
| ATOM | 133 | C    | GLY | 8 | 17.654 | -3.016 | 11.815 | 1.00 | 0.00 |
| ATOM | 134 | O    | GLY | 8 | 17.440 | -2.087 | 12.568 | 1.00 | 0.00 |
| ATOM | 135 | N    | ARG | 9 | 16.963 | -4.121 | 11.890 | 1.00 | 0.00 |
| ATOM | 136 | H    | ARG | 9 | 17.133 | -4.897 | 11.266 | 1.00 | 0.00 |
| ATOM | 137 | CA   | ARG | 9 | 15.891 | -4.261 | 12.916 | 1.00 | 0.00 |
| ATOM | 138 | HA   | ARG | 9 | 15.091 | -3.546 | 12.727 | 1.00 | 0.00 |
| ATOM | 139 | CB   | ARG | 9 | 15.309 | -5.674 | 12.855 | 1.00 | 0.00 |

|      |     |      |     |    |        |        |        |      |      |
|------|-----|------|-----|----|--------|--------|--------|------|------|
| ATOM | 140 | HB2  | ARG | 9  | 14.946 | -5.876 | 11.847 | 1.00 | 0.00 |
| ATOM | 141 | HB3  | ARG | 9  | 16.082 | -6.398 | 13.113 | 1.00 | 0.00 |
| ATOM | 142 | CG   | ARG | 9  | 14.150 | -5.790 | 13.848 | 1.00 | 0.00 |
| ATOM | 143 | HG2  | ARG | 9  | 14.505 | -5.552 | 14.851 | 1.00 | 0.00 |
| ATOM | 144 | HG3  | ARG | 9  | 13.360 | -5.094 | 13.567 | 1.00 | 0.00 |
| ATOM | 145 | CD   | ARG | 9  | 13.602 | -7.219 | 13.828 | 1.00 | 0.00 |
| ATOM | 146 | HD2  | ARG | 9  | 13.319 | -7.501 | 12.814 | 1.00 | 0.00 |
| ATOM | 147 | HD3  | ARG | 9  | 14.352 | -7.917 | 14.202 | 1.00 | 0.00 |
| ATOM | 148 | NE   | ARG | 9  | 12.397 | -7.301 | 14.701 | 1.00 | 0.00 |
| ATOM | 149 | HE   | ARG | 9  | 11.544 | -6.813 | 14.471 | 1.00 | 0.00 |
| ATOM | 150 | CZ   | ARG | 9  | 12.430 | -8.017 | 15.791 | 1.00 | 0.00 |
| ATOM | 151 | NH1  | ARG | 9  | 12.904 | -9.232 | 15.761 | 1.00 | 0.00 |
| ATOM | 152 | HH11 | ARG | 9  | 13.245 | -9.617 | 14.891 | 1.00 | 0.00 |
| ATOM | 153 | HH12 | ARG | 9  | 12.928 | -9.783 | 16.607 | 1.00 | 0.00 |
| ATOM | 154 | NH2  | ARG | 9  | 11.989 | -7.516 | 16.913 | 1.00 | 0.00 |
| ATOM | 155 | HH21 | ARG | 9  | 11.624 | -6.575 | 16.933 | 1.00 | 0.00 |
| ATOM | 156 | HH22 | ARG | 9  | 12.016 | -8.072 | 17.756 | 1.00 | 0.00 |
| ATOM | 157 | C    | ARG | 9  | 16.481 | -4.010 | 14.305 | 1.00 | 0.00 |
| ATOM | 158 | O    | ARG | 9  | 15.832 | -3.465 | 15.176 | 1.00 | 0.00 |
| ATOM | 159 | N    | GLN | 10 | 17.707 | -4.405 | 14.520 | 1.00 | 0.00 |



|      |     |      |     |    |        |        |        |      |      |
|------|-----|------|-----|----|--------|--------|--------|------|------|
| ATOM | 160 | H    | GLN | 10 | 18.253 | -4.859 | 13.801 | 1.00 | 0.00 |
| ATOM | 161 | CA   | GLN | 10 | 18.336 | -4.189 | 15.853 | 1.00 | 0.00 |
| ATOM | 162 | HA   | GLN | 10 | 17.821 | -4.775 | 16.615 | 1.00 | 0.00 |
| ATOM | 163 | CB   | GLN | 10 | 19.799 | -4.633 | 15.802 | 1.00 | 0.00 |
| ATOM | 164 | HB2  | GLN | 10 | 20.306 | -4.123 | 14.983 | 1.00 | 0.00 |
| ATOM | 165 | HB3  | GLN | 10 | 20.289 | -4.383 | 16.743 | 1.00 | 0.00 |
| ATOM | 166 | CG   | GLN | 10 | 19.866 | -6.146 | 15.580 | 1.00 | 0.00 |
| ATOM | 167 | HG2  | GLN | 10 | 19.286 | -6.666 | 16.343 | 1.00 | 0.00 |
| ATOM | 168 | HG3  | GLN | 10 | 19.479 | -6.402 | 14.593 | 1.00 | 0.00 |
| ATOM | 169 | CD   | GLN | 10 | 21.320 | -6.611 | 15.670 | 1.00 | 0.00 |
| ATOM | 170 | OE1  | GLN | 10 | 21.981 | -6.863 | 14.573 | 1.00 | 0.00 |
| ATOM | 171 | NE2  | GLN | 10 | 21.861 | -6.747 | 16.749 | 1.00 | 0.00 |
| ATOM | 172 | HE21 | GLN | 10 | 22.822 | -7.055 | 16.793 | 1.00 | 0.00 |
| ATOM | 173 | HE22 | GLN | 10 | 21.347 | -6.552 | 17.596 | 1.00 | 0.00 |
| ATOM | 174 | C    | GLN | 10 | 18.266 | -2.704 | 16.215 | 1.00 | 0.00 |
| ATOM | 175 | O    | GLN | 10 | 18.108 | -2.343 | 17.364 | 1.00 | 0.00 |
| ATOM | 176 | N    | GLY | 11 | 18.383 | -1.841 | 15.244 | 1.00 | 0.00 |
| ATOM | 177 | H    | GLY | 11 | 18.515 | -2.135 | 14.287 | 1.00 | 0.00 |
| ATOM | 178 | CA   | GLY | 11 | 18.324 | -0.380 | 15.533 | 1.00 | 0.00 |
| ATOM | 179 | HA2  | GLY | 11 | 19.194 | -0.081 | 16.118 | 1.00 | 0.00 |

|      |     |     |     |    |        |        |        |      |      |
|------|-----|-----|-----|----|--------|--------|--------|------|------|
| ATOM | 180 | HA3 | GLY | 11 | 18.302 | 0.183  | 14.600 | 1.00 | 0.00 |
| ATOM | 181 | C   | GLY | 11 | 17.056 | -0.070 | 16.332 | 1.00 | 0.00 |
| ATOM | 182 | O   | GLY | 11 | 17.049 | 0.785  | 17.194 | 1.00 | 0.00 |
| ATOM | 183 | N   | ASP | 12 | 15.984 | -0.759 | 16.051 | 1.00 | 0.00 |
| ATOM | 184 | H   | ASP | 12 | 15.982 | -1.471 | 15.334 | 1.00 | 0.00 |
| ATOM | 185 | CA  | ASP | 12 | 14.719 | -0.502 | 16.796 | 1.00 | 0.00 |
| ATOM | 186 | HA  | ASP | 12 | 13.909 | -1.105 | 16.384 | 1.00 | 0.00 |
| ATOM | 187 | CB  | ASP | 12 | 14.907 | -0.876 | 18.267 | 1.00 | 0.00 |
| ATOM | 188 | HB2 | ASP | 12 | 15.760 | -0.333 | 18.675 | 1.00 | 0.00 |
| ATOM | 189 | HB3 | ASP | 12 | 14.009 | -0.615 | 18.826 | 1.00 | 0.00 |
| ATOM | 190 | CG  | ASP | 12 | 15.159 | -2.381 | 18.382 | 1.00 | 0.00 |
| ATOM | 191 | OD1 | ASP | 12 | 14.921 | -3.077 | 17.409 | 1.00 | 0.00 |
| ATOM | 192 | OD2 | ASP | 12 | 15.586 | -2.811 | 19.441 | 1.00 | 0.00 |
| ATOM | 193 | C   | ASP | 12 | 14.355 | 0.980  | 16.689 | 1.00 | 0.00 |
| ATOM | 194 | O   | ASP | 12 | 14.037 | 1.623  | 17.669 | 1.00 | 0.00 |
| ATOM | 195 | N   | SER | 13 | 14.400 | 1.528  | 15.505 | 1.00 | 0.00 |
| ATOM | 196 | H   | SER | 13 | 14.664 | 1.000  | 14.685 | 1.00 | 0.00 |
| ATOM | 197 | CA  | SER | 13 | 14.056 | 2.968  | 15.338 | 1.00 | 0.00 |
| ATOM | 198 | HA  | SER | 13 | 14.769 | 3.592  | 15.877 | 1.00 | 0.00 |
| ATOM | 199 | CB  | SER | 13 | 14.109 | 3.336  | 13.854 | 1.00 | 0.00 |

|      |     |     |     |    |        |        |        |      |      |
|------|-----|-----|-----|----|--------|--------|--------|------|------|
| ATOM | 200 | HB2 | SER | 13 | 13.347 | 2.775  | 13.312 | 1.00 | 0.00 |
| ATOM | 201 | HB3 | SER | 13 | 13.926 | 4.404  | 13.737 | 1.00 | 0.00 |
| ATOM | 202 | OG  | SER | 13 | 15.391 | 3.016  | 13.333 | 1.00 | 0.00 |
| ATOM | 203 | HG  | SER | 13 | 15.425 | 3.246  | 12.402 | 1.00 | 0.00 |
| ATOM | 204 | C   | SER | 13 | 12.646 | 3.219  | 15.876 | 1.00 | 0.00 |
| ATOM | 205 | O   | SER | 13 | 12.373 | 4.240  | 16.476 | 1.00 | 0.00 |
| ATOM | 206 | N   | SER | 14 | 11.749 | 2.295  | 15.666 | 1.00 | 0.00 |
| ATOM | 207 | H   | SER | 14 | 11.971 | 1.443  | 15.169 | 1.00 | 0.00 |
| ATOM | 208 | CA  | SER | 14 | 10.356 | 2.480  | 16.166 | 1.00 | 0.00 |
| ATOM | 209 | HA  | SER | 14 | 10.359 | 3.062  | 17.087 | 1.00 | 0.00 |
| ATOM | 210 | CB  | SER | 14 | 9.533  | 3.229  | 15.116 | 1.00 | 0.00 |
| ATOM | 211 | HB2 | SER | 14 | 9.950  | 4.225  | 14.970 | 1.00 | 0.00 |
| ATOM | 212 | HB3 | SER | 14 | 9.561  | 2.682  | 14.173 | 1.00 | 0.00 |
| ATOM | 213 | OG  | SER | 14 | 8.188  | 3.339  | 15.560 | 1.00 | 0.00 |
| ATOM | 214 | HG  | SER | 14 | 7.671  | 3.808  | 14.901 | 1.00 | 0.00 |
| ATOM | 215 | C   | SER | 14 | 9.726  | 1.110  | 16.426 | 1.00 | 0.00 |
| ATOM | 216 | O   | SER | 14 | 9.815  | 0.210  | 15.616 | 1.00 | 0.00 |
| ATOM | 217 | N   | SER | 15 | 9.090  | 0.945  | 17.555 | 1.00 | 0.00 |
| ATOM | 218 | H   | SER | 15 | 9.013  | 1.687  | 18.236 | 1.00 | 0.00 |
| ATOM | 219 | CA  | SER | 15 | 8.457  | -0.367 | 17.866 | 1.00 | 0.00 |

|      |     |     |     |    |       |        |        |      |      |
|------|-----|-----|-----|----|-------|--------|--------|------|------|
| ATOM | 220 | HA  | SER | 15 | 9.141 | -1.183 | 17.631 | 1.00 | 0.00 |
| ATOM | 221 | CB  | SER | 15 | 8.117 | -0.428 | 19.357 | 1.00 | 0.00 |
| ATOM | 222 | HB2 | SER | 15 | 7.780 | -1.433 | 19.613 | 1.00 | 0.00 |
| ATOM | 223 | HB3 | SER | 15 | 9.003 | -0.183 | 19.943 | 1.00 | 0.00 |
| ATOM | 224 | OG  | SER | 15 | 7.086 | 0.505  | 19.645 | 1.00 | 0.00 |
| ATOM | 225 | HG  | SER | 15 | 6.873 | 0.467  | 20.580 | 1.00 | 0.00 |
| ATOM | 226 | C   | SER | 15 | 7.177 | -0.528 | 17.043 | 1.00 | 0.00 |
| ATOM | 227 | O   | SER | 15 | 6.757 | -1.627 | 16.741 | 1.00 | 0.00 |
| ATOM | 228 | N   | CYX | 16 | 6.554 | 0.560  | 16.676 | 1.00 | 0.00 |
| ATOM | 229 | H   | CYX | 16 | 6.896 | 1.477  | 16.923 | 1.00 | 0.00 |
| ATOM | 230 | CA  | CYX | 16 | 5.304 | 0.465  | 15.870 | 1.00 | 0.00 |
| ATOM | 231 | HA  | CYX | 16 | 4.543 | -0.091 | 16.418 | 1.00 | 0.00 |
| ATOM | 232 | CB  | CYX | 16 | 4.772 | 1.870  | 15.583 | 1.00 | 0.00 |
| ATOM | 233 | HB2 | CYX | 16 | 4.795 | 2.461  | 16.498 | 1.00 | 0.00 |
| ATOM | 234 | HB3 | CYX | 16 | 5.395 | 2.347  | 14.827 | 1.00 | 0.00 |
| ATOM | 235 | SG  | CYX | 16 | 3.049 | 1.764  | 15.036 | 1.00 | 0.00 |
| ATOM | 236 | C   | CYX | 16 | 5.605 | -0.246 | 14.549 | 1.00 | 0.00 |
| ATOM | 237 | O   | CYX | 16 | 4.735 | -0.832 | 13.936 | 1.00 | 0.00 |
| ATOM | 238 | N   | GLU | 17 | 6.831 | -0.199 | 14.106 | 1.00 | 0.00 |
| ATOM | 239 | H   | GLU | 17 | 7.559 | 0.286  | 14.610 | 1.00 | 0.00 |

|      |     |     |     |    |        |        |        |      |      |
|------|-----|-----|-----|----|--------|--------|--------|------|------|
| ATOM | 240 | CA  | GLU | 17 | 7.187  | -0.872 | 12.826 | 1.00 | 0.00 |
| ATOM | 241 | HA  | GLU | 17 | 6.587  | -0.473 | 12.008 | 1.00 | 0.00 |
| ATOM | 242 | CB  | GLU | 17 | 8.664  | -0.624 | 12.515 | 1.00 | 0.00 |
| ATOM | 243 | HB2 | GLU | 17 | 9.255  | -0.757 | 13.422 | 1.00 | 0.00 |
| ATOM | 244 | HB3 | GLU | 17 | 9.000  | -1.331 | 11.756 | 1.00 | 0.00 |
| ATOM | 245 | CG  | GLU | 17 | 8.842  | 0.805  | 11.995 | 1.00 | 0.00 |
| ATOM | 246 | HG2 | GLU | 17 | 8.216  | 0.952  | 11.115 | 1.00 | 0.00 |
| ATOM | 247 | HG3 | GLU | 17 | 8.551  | 1.513  | 12.770 | 1.00 | 0.00 |
| ATOM | 248 | CD  | GLU | 17 | 10.308 | 1.032  | 11.621 | 1.00 | 0.00 |
| ATOM | 249 | OE1 | GLU | 17 | 11.079 | 0.094  | 11.729 | 1.00 | 0.00 |
| ATOM | 250 | OE2 | GLU | 17 | 10.634 | 2.142  | 11.233 | 1.00 | 0.00 |
| ATOM | 251 | C   | GLU | 17 | 6.937  | -2.376 | 12.955 | 1.00 | 0.00 |
| ATOM | 252 | O   | GLU | 17 | 6.321  | -2.987 | 12.104 | 1.00 | 0.00 |
| ATOM | 253 | N   | ARG | 18 | 7.410  | -2.978 | 14.012 | 1.00 | 0.00 |
| ATOM | 254 | H   | ARG | 18 | 7.922  | -2.477 | 14.724 | 1.00 | 0.00 |
| ATOM | 255 | CA  | ARG | 18 | 7.199  | -4.443 | 14.193 | 1.00 | 0.00 |
| ATOM | 256 | HA  | ARG | 18 | 7.780  | -5.002 | 13.459 | 1.00 | 0.00 |
| ATOM | 257 | CB  | ARG | 18 | 7.655  | -4.856 | 15.594 | 1.00 | 0.00 |
| ATOM | 258 | HB2 | ARG | 18 | 8.710  | -4.612 | 15.721 | 1.00 | 0.00 |
| ATOM | 259 | HB3 | ARG | 18 | 7.067  | -4.323 | 16.341 | 1.00 | 0.00 |

|      |     |      |     |    |       |        |        |      |      |
|------|-----|------|-----|----|-------|--------|--------|------|------|
| ATOM | 260 | CG   | ARG | 18 | 7.457 | -6.363 | 15.770 | 1.00 | 0.00 |
| ATOM | 261 | HG2  | ARG | 18 | 6.409 | -6.614 | 15.609 | 1.00 | 0.00 |
| ATOM | 262 | HG3  | ARG | 18 | 8.073 | -6.898 | 15.047 | 1.00 | 0.00 |
| ATOM | 263 | CD   | ARG | 18 | 7.866 | -6.769 | 17.188 | 1.00 | 0.00 |
| ATOM | 264 | HD2  | ARG | 18 | 7.937 | -7.854 | 17.264 | 1.00 | 0.00 |
| ATOM | 265 | HD3  | ARG | 18 | 8.827 | -6.324 | 17.445 | 1.00 | 0.00 |
| ATOM | 266 | NE   | ARG | 18 | 6.842 | -6.288 | 18.158 | 1.00 | 0.00 |
| ATOM | 267 | HE   | ARG | 18 | 6.084 | -5.687 | 17.869 | 1.00 | 0.00 |
| ATOM | 268 | CZ   | ARG | 18 | 6.914 | -6.641 | 19.413 | 1.00 | 0.00 |
| ATOM | 269 | NH1  | ARG | 18 | 7.414 | -5.819 | 20.295 | 1.00 | 0.00 |
| ATOM | 270 | HH11 | ARG | 18 | 7.745 | -4.911 | 20.003 | 1.00 | 0.00 |
| ATOM | 271 | HH12 | ARG | 18 | 7.468 | -6.096 | 21.265 | 1.00 | 0.00 |
| ATOM | 272 | NH2  | ARG | 18 | 6.487 | -7.817 | 19.784 | 1.00 | 0.00 |
| ATOM | 273 | HH21 | ARG | 18 | 6.102 | -8.451 | 19.098 | 1.00 | 0.00 |
| ATOM | 274 | HH22 | ARG | 18 | 6.544 | -8.089 | 20.755 | 1.00 | 0.00 |
| ATOM | 275 | C    | ARG | 18 | 5.713 | -4.768 | 14.025 | 1.00 | 0.00 |
| ATOM | 276 | O    | ARG | 18 | 5.341 | -5.894 | 13.758 | 1.00 | 0.00 |
| ATOM | 277 | N    | GLN | 19 | 4.860 | -3.793 | 14.182 | 1.00 | 0.00 |
| ATOM | 278 | H    | GLN | 19 | 5.161 | -2.856 | 14.406 | 1.00 | 0.00 |
| ATOM | 279 | CA   | GLN | 19 | 3.401 | -4.050 | 14.034 | 1.00 | 0.00 |

|      |     |      |     |    |       |        |        |      |      |
|------|-----|------|-----|----|-------|--------|--------|------|------|
| ATOM | 280 | HA   | GLN | 19 | 3.129 | -4.982 | 14.530 | 1.00 | 0.00 |
| ATOM | 281 | CB   | GLN | 19 | 2.614 | -2.906 | 14.676 | 1.00 | 0.00 |
| ATOM | 282 | HB2  | GLN | 19 | 3.011 | -1.952 | 14.330 | 1.00 | 0.00 |
| ATOM | 283 | HB3  | GLN | 19 | 1.564 | -2.986 | 14.397 | 1.00 | 0.00 |
| ATOM | 284 | CG   | GLN | 19 | 2.745 | -2.990 | 16.198 | 1.00 | 0.00 |
| ATOM | 285 | HG2  | GLN | 19 | 2.486 | -3.991 | 16.544 | 1.00 | 0.00 |
| ATOM | 286 | HG3  | GLN | 19 | 3.764 | -2.753 | 16.504 | 1.00 | 0.00 |
| ATOM | 287 | CD   | GLN | 19 | 1.793 | -1.986 | 16.850 | 1.00 | 0.00 |
| ATOM | 288 | OE1  | GLN | 19 | 1.314 | -1.076 | 16.203 | 1.00 | 0.00 |
| ATOM | 289 | NE2  | GLN | 19 | 1.496 | -2.112 | 18.115 | 1.00 | 0.00 |
| ATOM | 290 | HE21 | GLN | 19 | 0.868 | -1.453 | 18.551 | 1.00 | 0.00 |
| ATOM | 291 | HE22 | GLN | 19 | 1.896 | -2.869 | 18.651 | 1.00 | 0.00 |
| ATOM | 292 | C    | GLN | 19 | 3.045 | -4.145 | 12.548 | 1.00 | 0.00 |
| ATOM | 293 | O    | GLN | 19 | 2.014 | -4.673 | 12.181 | 1.00 | 0.00 |
| ATOM | 294 | N    | VAL | 20 | 3.889 | -3.641 | 11.689 | 1.00 | 0.00 |
| ATOM | 295 | H    | VAL | 20 | 4.748 | -3.199 | 11.984 | 1.00 | 0.00 |
| ATOM | 296 | CA   | VAL | 20 | 3.593 | -3.707 | 10.230 | 1.00 | 0.00 |
| ATOM | 297 | HA   | VAL | 20 | 2.555 | -3.434 | 10.043 | 1.00 | 0.00 |
| ATOM | 298 | CB   | VAL | 20 | 4.500 | -2.730 | 9.477  | 1.00 | 0.00 |
| ATOM | 299 | HB   | VAL | 20 | 4.508 | -1.772 | 9.995  | 1.00 | 0.00 |

|      |     |          |    |       |        |        |      |      |
|------|-----|----------|----|-------|--------|--------|------|------|
| ATOM | 300 | CG1 VAL  | 20 | 5.923 | -3.289 | 9.417  | 1.00 | 0.00 |
| ATOM | 301 | HG11 VAL | 20 | 5.916 | -4.248 | 8.898  | 1.00 | 0.00 |
| ATOM | 302 | HG12 VAL | 20 | 6.566 | -2.592 | 8.880  | 1.00 | 0.00 |
| ATOM | 303 | HG13 VAL | 20 | 6.303 | -3.427 | 10.429 | 1.00 | 0.00 |
| ATOM | 304 | CG2 VAL  | 20 | 3.970 | -2.536 | 8.055  | 1.00 | 0.00 |
| ATOM | 305 | HG21 VAL | 20 | 2.958 | -2.135 | 8.096  | 1.00 | 0.00 |
| ATOM | 306 | HG22 VAL | 20 | 4.615 | -1.841 | 7.518  | 1.00 | 0.00 |
| ATOM | 307 | HG23 VAL | 20 | 3.959 | -3.495 | 7.537  | 1.00 | 0.00 |
| ATOM | 308 | C VAL    | 20 | 3.842 | -5.131 | 9.726  | 1.00 | 0.00 |
| ATOM | 309 | O VAL    | 20 | 3.187 | -5.600 | 8.815  | 1.00 | 0.00 |
| ATOM | 310 | N ASP    | 21 | 4.782 | -5.823 | 10.311 | 1.00 | 0.00 |
| ATOM | 311 | H ASP    | 21 | 5.331 | -5.439 | 11.067 | 1.00 | 0.00 |
| ATOM | 312 | CA ASP   | 21 | 5.070 | -7.215 | 9.866  | 1.00 | 0.00 |
| ATOM | 313 | HA ASP   | 21 | 5.483 | -7.212 | 8.857  | 1.00 | 0.00 |
| ATOM | 314 | CB ASP   | 21 | 6.091 | -7.851 | 10.809 | 1.00 | 0.00 |
| ATOM | 315 | HB2 ASP  | 21 | 5.781 | -7.694 | 11.842 | 1.00 | 0.00 |
| ATOM | 316 | HB3 ASP  | 21 | 6.155 | -8.921 | 10.608 | 1.00 | 0.00 |
| ATOM | 317 | CG ASP   | 21 | 7.462 | -7.208 | 10.585 | 1.00 | 0.00 |
| ATOM | 318 | OD1 ASP  | 21 | 7.581 | -6.424 | 9.657  | 1.00 | 0.00 |
| ATOM | 319 | OD2 ASP  | 21 | 8.367 | -7.510 | 11.344 | 1.00 | 0.00 |



|      |     |      |     |    |        |         |        |      |      |
|------|-----|------|-----|----|--------|---------|--------|------|------|
| ATOM | 320 | C    | ASP | 21 | 3.778  | -8.035  | 9.884  | 1.00 | 0.00 |
| ATOM | 321 | O    | ASP | 21 | 3.596  | -8.942  | 9.097  | 1.00 | 0.00 |
| ATOM | 322 | N    | ARG | 22 | 2.880  | -7.721  | 10.776 | 1.00 | 0.00 |
| ATOM | 323 | H    | ARG | 22 | 3.025  | -6.969  | 11.434 | 1.00 | 0.00 |
| ATOM | 324 | CA   | ARG | 22 | 1.600  | -8.482  | 10.843 | 1.00 | 0.00 |
| ATOM | 325 | HA   | ARG | 22 | 1.787  | -9.549  | 10.715 | 1.00 | 0.00 |
| ATOM | 326 | CB   | ARG | 22 | 0.945  | -8.260  | 12.209 | 1.00 | 0.00 |
| ATOM | 327 | HB2  | ARG | 22 | 1.665  | -8.479  | 12.998 | 1.00 | 0.00 |
| ATOM | 328 | HB3  | ARG | 22 | 0.620  | -7.224  | 12.292 | 1.00 | 0.00 |
| ATOM | 329 | CG   | ARG | 22 | -0.263 | -9.186  | 12.351 | 1.00 | 0.00 |
| ATOM | 330 | HG2  | ARG | 22 | -0.937 | -9.037  | 11.508 | 1.00 | 0.00 |
| ATOM | 331 | HG3  | ARG | 22 | 0.073  | -10.223 | 12.367 | 1.00 | 0.00 |
| ATOM | 332 | CD   | ARG | 22 | -0.999 | -8.868  | 13.655 | 1.00 | 0.00 |
| ATOM | 333 | HD2  | ARG | 22 | -0.301 | -8.869  | 14.492 | 1.00 | 0.00 |
| ATOM | 334 | HD3  | ARG | 22 | -1.483 | -7.894  | 13.587 | 1.00 | 0.00 |
| ATOM | 335 | NE   | ARG | 22 | -2.042 | -9.904  | 13.902 | 1.00 | 0.00 |
| ATOM | 336 | HE   | ARG | 22 | -2.167 | -10.322 | 14.813 | 1.00 | 0.00 |
| ATOM | 337 | CZ   | ARG | 22 | -2.819 | -10.291 | 12.927 | 1.00 | 0.00 |
| ATOM | 338 | NH1  | ARG | 22 | -4.053 | -9.868  | 12.869 | 1.00 | 0.00 |
| ATOM | 339 | HH11 | ARG | 22 | -4.403 | -9.242  | 13.580 | 1.00 | 0.00 |

|      |     |      |     |    |        |         |        |      |      |
|------|-----|------|-----|----|--------|---------|--------|------|------|
| ATOM | 340 | HH12 | ARG | 22 | -4.652 | -10.170 | 12.113 | 1.00 | 0.00 |
| ATOM | 341 | NH2  | ARG | 22 | -2.364 | -11.101 | 12.011 | 1.00 | 0.00 |
| ATOM | 342 | HH21 | ARG | 22 | -1.409 | -11.428 | 12.059 | 1.00 | 0.00 |
| ATOM | 343 | HH22 | ARG | 22 | -2.968 | -11.398 | 11.258 | 1.00 | 0.00 |
| ATOM | 344 | C    | ARG | 22 | 0.662  | -7.995  | 9.740  | 1.00 | 0.00 |
| ATOM | 345 | O    | ARG | 22 | -0.292 | -8.658  | 9.384  | 1.00 | 0.00 |
| ATOM | 346 | N    | VAL | 23 | 0.924  | -6.839  | 9.194  | 1.00 | 0.00 |
| ATOM | 347 | H    | VAL | 23 | 1.715  | -6.283  | 9.486  | 1.00 | 0.00 |
| ATOM | 348 | CA   | VAL | 23 | 0.048  | -6.308  | 8.112  | 1.00 | 0.00 |
| ATOM | 349 | HA   | VAL | 23 | -0.874 | -5.909  | 8.533  | 1.00 | 0.00 |
| ATOM | 350 | CB   | VAL | 23 | 0.776  | -5.183  | 7.373  | 1.00 | 0.00 |
| ATOM | 351 | HB   | VAL | 23 | 1.783  | -5.510  | 7.113  | 1.00 | 0.00 |
| ATOM | 352 | CG1  | VAL | 23 | 0.009  | -4.832  | 6.096  | 1.00 | 0.00 |
| ATOM | 353 | HG11 | VAL | 23 | -0.998 | -4.505  | 6.355  | 1.00 | 0.00 |
| ATOM | 354 | HG12 | VAL | 23 | 0.527  | -4.031  | 5.569  | 1.00 | 0.00 |
| ATOM | 355 | HG13 | VAL | 23 | -0.049 | -5.711  | 5.453  | 1.00 | 0.00 |
| ATOM | 356 | CG2  | VAL | 23 | 0.858  | -3.950  | 8.275  | 1.00 | 0.00 |
| ATOM | 357 | HG21 | VAL | 23 | 1.405  | -4.201  | 9.184  | 1.00 | 0.00 |
| ATOM | 358 | HG22 | VAL | 23 | 1.377  | -3.149  | 7.749  | 1.00 | 0.00 |
| ATOM | 359 | HG23 | VAL | 23 | -0.148 | -3.622  | 8.535  | 1.00 | 0.00 |

|      |     |      |     |    |        |         |       |      |      |
|------|-----|------|-----|----|--------|---------|-------|------|------|
| ATOM | 360 | C    | VAL | 23 | -0.286 | -7.431  | 7.129 | 1.00 | 0.00 |
| ATOM | 361 | O    | VAL | 23 | -1.324 | -8.056  | 7.214 | 1.00 | 0.00 |
| ATOM | 362 | N    | ASN | 24 | 0.587  | -7.691  | 6.197 | 1.00 | 0.00 |
| ATOM | 363 | H    | ASN | 24 | 1.452  | -7.176  | 6.122 | 1.00 | 0.00 |
| ATOM | 364 | CA   | ASN | 24 | 0.321  | -8.772  | 5.208 | 1.00 | 0.00 |
| ATOM | 365 | HA   | ASN | 24 | 1.091  | -8.778  | 4.437 | 1.00 | 0.00 |
| ATOM | 366 | CB   | ASN | 24 | 0.332  | -10.126 | 5.920 | 1.00 | 0.00 |
| ATOM | 367 | HB2  | ASN | 24 | -0.437 | -10.154 | 6.691 | 1.00 | 0.00 |
| ATOM | 368 | HB3  | ASN | 24 | 0.159  | -10.931 | 5.205 | 1.00 | 0.00 |
| ATOM | 369 | CG   | ASN | 24 | 1.695  | -10.344 | 6.581 | 1.00 | 0.00 |
| ATOM | 370 | OD1  | ASN | 24 | 2.663  | -9.697  | 6.231 | 1.00 | 0.00 |
| ATOM | 371 | ND2  | ASN | 24 | 1.813  | -11.234 | 7.528 | 1.00 | 0.00 |
| ATOM | 372 | HD21 | ASN | 24 | 2.710  | -11.383 | 7.968 | 1.00 | 0.00 |
| ATOM | 373 | HD22 | ASN | 24 | 1.007  | -11.770 | 7.816 | 1.00 | 0.00 |
| ATOM | 374 | C    | ASN | 24 | -1.048 | -8.544  | 4.562 | 1.00 | 0.00 |
| ATOM | 375 | O    | ASN | 24 | -2.010 | -9.218  | 4.870 | 1.00 | 0.00 |
| ATOM | 376 | N    | LEU | 25 | -1.142 | -7.599  | 3.668 | 1.00 | 0.00 |
| ATOM | 377 | H    | LEU | 25 | -0.345 | -7.037  | 3.406 | 1.00 | 0.00 |
| ATOM | 378 | CA   | LEU | 25 | -2.448 | -7.328  | 3.003 | 1.00 | 0.00 |
| ATOM | 379 | HA   | LEU | 25 | -3.243 | -7.899  | 3.483 | 1.00 | 0.00 |

|      |     |      |     |    |        |         |        |      |      |
|------|-----|------|-----|----|--------|---------|--------|------|------|
| ATOM | 380 | CB   | LEU | 25 | -2.778 | -5.838  | 3.118  | 1.00 | 0.00 |
| ATOM | 381 | HB2  | LEU | 25 | -1.886 | -5.251  | 2.900  | 1.00 | 0.00 |
| ATOM | 382 | HB3  | LEU | 25 | -3.563 | -5.584  | 2.406  | 1.00 | 0.00 |
| ATOM | 383 | CG   | LEU | 25 | -3.258 | -5.529  | 4.538  | 1.00 | 0.00 |
| ATOM | 384 | HG   | LEU | 25 | -2.618 | -6.041  | 5.257  | 1.00 | 0.00 |
| ATOM | 385 | CD1  | LEU | 25 | -3.195 | -4.021  | 4.782  | 1.00 | 0.00 |
| ATOM | 386 | HD11 | LEU | 25 | -3.835 | -3.510  | 4.063  | 1.00 | 0.00 |
| ATOM | 387 | HD12 | LEU | 25 | -3.537 | -3.802  | 5.793  | 1.00 | 0.00 |
| ATOM | 388 | HD13 | LEU | 25 | -2.168 | -3.676  | 4.663  | 1.00 | 0.00 |
| ATOM | 389 | CD2  | LEU | 25 | -4.701 | -6.013  | 4.705  | 1.00 | 0.00 |
| ATOM | 390 | HD21 | LEU | 25 | -4.746 | -7.089  | 4.532  | 1.00 | 0.00 |
| ATOM | 391 | HD22 | LEU | 25 | -5.043 | -5.794  | 5.716  | 1.00 | 0.00 |
| ATOM | 392 | HD23 | LEU | 25 | -5.341 | -5.503  | 3.986  | 1.00 | 0.00 |
| ATOM | 393 | C    | LEU | 25 | -2.356 | -7.717  | 1.526  | 1.00 | 0.00 |
| ATOM | 394 | O    | LEU | 25 | -2.384 | -6.876  | 0.649  | 1.00 | 0.00 |
| ATOM | 395 | N    | LYS | 26 | -2.247 | -8.987  | 1.244  | 1.00 | 0.00 |
| ATOM | 396 | H    | LYS | 26 | -2.219 | -9.688  | 1.971  | 1.00 | 0.00 |
| ATOM | 397 | CA   | LYS | 26 | -2.151 | -9.435  | -0.174 | 1.00 | 0.00 |
| ATOM | 398 | HA   | LYS | 26 | -1.362 | -8.890  | -0.692 | 1.00 | 0.00 |
| ATOM | 399 | CB   | LYS | 26 | -1.819 | -10.928 | -0.212 | 1.00 | 0.00 |

|      |     |     |     |    |        |         |        |      |      |
|------|-----|-----|-----|----|--------|---------|--------|------|------|
| ATOM | 400 | HB2 | LYS | 26 | -0.962 | -11.127 | 0.431  | 1.00 | 0.00 |
| ATOM | 401 | HB3 | LYS | 26 | -2.677 | -11.501 | 0.139  | 1.00 | 0.00 |
| ATOM | 402 | CG  | LYS | 26 | -1.485 | -11.339 | -1.648 | 1.00 | 0.00 |
| ATOM | 403 | HG2 | LYS | 26 | -2.052 | -12.232 | -1.912 | 1.00 | 0.00 |
| ATOM | 404 | HG3 | LYS | 26 | -1.746 | -10.529 | -2.328 | 1.00 | 0.00 |
| ATOM | 405 | CD  | LYS | 26 | 0.012  | -11.635 | -1.759 | 1.00 | 0.00 |
| ATOM | 406 | HD2 | LYS | 26 | 0.407  | -11.180 | -2.667 | 1.00 | 0.00 |
| ATOM | 407 | HD3 | LYS | 26 | 0.529  | -11.224 | -0.892 | 1.00 | 0.00 |
| ATOM | 408 | CE  | LYS | 26 | 0.231  | -13.149 | -1.812 | 1.00 | 0.00 |
| ATOM | 409 | HE2 | LYS | 26 | 0.546  | -13.506 | -0.831 | 1.00 | 0.00 |
| ATOM | 410 | HE3 | LYS | 26 | -0.699 | -13.642 | -2.096 | 1.00 | 0.00 |
| ATOM | 411 | NZ  | LYS | 26 | 1.286  | -13.464 | -2.816 | 1.00 | 0.00 |
| ATOM | 412 | HZ1 | LYS | 26 | 2.148  | -13.009 | -2.553 | 1.00 | 0.00 |
| ATOM | 413 | HZ2 | LYS | 26 | 1.430  | -14.463 | -2.851 | 1.00 | 0.00 |
| ATOM | 414 | HZ3 | LYS | 26 | 0.995  | -13.135 | -3.725 | 1.00 | 0.00 |
| ATOM | 415 | C   | LYS | 26 | -3.478 | -9.190  | -0.904 | 1.00 | 0.00 |
| ATOM | 416 | O   | LYS | 26 | -3.489 | -8.836  | -2.066 | 1.00 | 0.00 |
| ATOM | 417 | N   | PRO | 27 | -4.623 | -9.387  | -0.222 | 1.00 | 0.00 |
| ATOM | 418 | CD  | PRO | 27 | -4.732 | -9.812  | 1.188  | 1.00 | 0.00 |
| ATOM | 419 | HD2 | PRO | 27 | -4.043 | -9.230  | 1.800  | 1.00 | 0.00 |

|      |     |         |    |        |         |        |      |      |
|------|-----|---------|----|--------|---------|--------|------|------|
| ATOM | 420 | HD3 PRO | 27 | -4.484 | -10.871 | 1.271  | 1.00 | 0.00 |
| ATOM | 421 | CG PRO  | 27 | -6.171 | -9.533  | 1.515  | 1.00 | 0.00 |
| ATOM | 422 | HG2 PRO | 27 | -6.264 | -8.525  | 1.917  | 1.00 | 0.00 |
| ATOM | 423 | HG3 PRO | 27 | -6.522 | -10.253 | 2.255  | 1.00 | 0.00 |
| ATOM | 424 | CB PRO  | 27 | -6.918 | -9.679  | 0.235  | 1.00 | 0.00 |
| ATOM | 425 | HB2 PRO | 27 | -7.792 | -9.030  | 0.265  | 1.00 | 0.00 |
| ATOM | 426 | HB3 PRO | 27 | -7.231 | -10.700 | 0.013  | 1.00 | 0.00 |
| ATOM | 427 | CA PRO  | 27 | -5.944 | -9.189  | -0.835 | 1.00 | 0.00 |
| ATOM | 428 | HA PRO  | 27 | -5.988 | -9.777  | -1.752 | 1.00 | 0.00 |
| ATOM | 429 | C PRO   | 27 | -6.205 | -7.715  | -1.161 | 1.00 | 0.00 |
| ATOM | 430 | O PRO   | 27 | -6.752 | -7.388  | -2.196 | 1.00 | 0.00 |
| ATOM | 431 | N CYX   | 28 | -5.809 | -6.822  | -0.296 | 1.00 | 0.00 |
| ATOM | 432 | H CYX   | 28 | -5.347 | -7.080  | 0.565  | 1.00 | 0.00 |
| ATOM | 433 | CA CYX  | 28 | -6.030 | -5.375  | -0.574 | 1.00 | 0.00 |
| ATOM | 434 | HA CYX  | 28 | -7.084 | -5.186  | -0.774 | 1.00 | 0.00 |
| ATOM | 435 | CB CYX  | 28 | -5.607 | -4.549  | 0.643  | 1.00 | 0.00 |
| ATOM | 436 | HB2 CYX | 28 | -4.946 | -5.144  | 1.274  | 1.00 | 0.00 |
| ATOM | 437 | HB3 CYX | 28 | -5.082 | -3.654  | 0.310  | 1.00 | 0.00 |
| ATOM | 438 | SG CYX  | 28 | -7.067 | -4.145  | 1.634  | 1.00 | 0.00 |
| ATOM | 439 | C CYX   | 28 | -5.184 | -4.977  | -1.784 | 1.00 | 0.00 |

|      |     |     |     |    |        |        |        |      |      |
|------|-----|-----|-----|----|--------|--------|--------|------|------|
| ATOM | 440 | O   | CYX | 28 | -5.688 | -4.492 | -2.782 | 1.00 | 0.00 |
| ATOM | 441 | N   | GLU | 29 | -3.898 | -5.189 | -1.711 | 1.00 | 0.00 |
| ATOM | 442 | H   | GLU | 29 | -3.471 | -5.595 | -0.890 | 1.00 | 0.00 |
| ATOM | 443 | CA  | GLU | 29 | -3.023 | -4.838 | -2.859 | 1.00 | 0.00 |
| ATOM | 444 | HA  | GLU | 29 | -2.971 | -3.756 | -2.976 | 1.00 | 0.00 |
| ATOM | 445 | CB  | GLU | 29 | -1.612 | -5.371 | -2.611 | 1.00 | 0.00 |
| ATOM | 446 | HB2 | GLU | 29 | -1.373 | -5.289 | -1.551 | 1.00 | 0.00 |
| ATOM | 447 | HB3 | GLU | 29 | -1.559 | -6.417 | -2.915 | 1.00 | 0.00 |
| ATOM | 448 | CG  | GLU | 29 | -0.608 | -4.554 | -3.424 | 1.00 | 0.00 |
| ATOM | 449 | HG2 | GLU | 29 | -0.882 | -4.586 | -4.479 | 1.00 | 0.00 |
| ATOM | 450 | HG3 | GLU | 29 | -0.617 | -3.521 | -3.078 | 1.00 | 0.00 |
| ATOM | 451 | CD  | GLU | 29 | 0.794  | -5.139 | -3.244 | 1.00 | 0.00 |
| ATOM | 452 | OE1 | GLU | 29 | 0.925  | -6.089 | -2.488 | 1.00 | 0.00 |
| ATOM | 453 | OE2 | GLU | 29 | 1.712  | -4.630 | -3.864 | 1.00 | 0.00 |
| ATOM | 454 | C   | GLU | 29 | -3.592 | -5.476 | -4.126 | 1.00 | 0.00 |
| ATOM | 455 | O   | GLU | 29 | -3.500 | -4.930 | -5.208 | 1.00 | 0.00 |
| ATOM | 456 | N   | GLN | 30 | -4.176 | -6.636 | -4.001 | 1.00 | 0.00 |
| ATOM | 457 | H   | GLN | 30 | -4.250 | -7.099 | -3.106 | 1.00 | 0.00 |
| ATOM | 458 | CA  | GLN | 30 | -4.748 | -7.314 | -5.195 | 1.00 | 0.00 |
| ATOM | 459 | HA  | GLN | 30 | -4.015 | -7.341 | -6.002 | 1.00 | 0.00 |

|      |     |      |     |    |        |         |        |      |      |
|------|-----|------|-----|----|--------|---------|--------|------|------|
| ATOM | 460 | CB   | GLN | 30 | -5.128 | -8.751  | -4.833 | 1.00 | 0.00 |
| ATOM | 461 | HB2  | GLN | 30 | -5.547 | -8.775  | -3.827 | 1.00 | 0.00 |
| ATOM | 462 | HB3  | GLN | 30 | -5.867 | -9.122  | -5.543 | 1.00 | 0.00 |
| ATOM | 463 | CG   | GLN | 30 | -3.880 | -9.637  | -4.886 | 1.00 | 0.00 |
| ATOM | 464 | HG2  | GLN | 30 | -3.560 | -9.777  | -5.919 | 1.00 | 0.00 |
| ATOM | 465 | HG3  | GLN | 30 | -3.069 | -9.186  | -4.314 | 1.00 | 0.00 |
| ATOM | 466 | CD   | GLN | 30 | -4.200 | -11.005 | -4.284 | 1.00 | 0.00 |
| ATOM | 467 | OE1  | GLN | 30 | -5.297 | -11.235 | -3.814 | 1.00 | 0.00 |
| ATOM | 468 | NE2  | GLN | 30 | -3.281 | -11.932 | -4.276 | 1.00 | 0.00 |
| ATOM | 469 | HE21 | GLN | 30 | -3.485 | -12.839 | -3.880 | 1.00 | 0.00 |
| ATOM | 470 | HE22 | GLN | 30 | -2.369 | -11.739 | -4.666 | 1.00 | 0.00 |
| ATOM | 471 | C    | GLN | 30 | -5.992 | -6.559  | -5.670 | 1.00 | 0.00 |
| ATOM | 472 | O    | GLN | 30 | -6.368 | -6.636  | -6.823 | 1.00 | 0.00 |
| ATOM | 473 | N    | HID | 31 | -6.634 | -5.825  | -4.801 | 1.00 | 0.00 |
| ATOM | 474 | H    | HID | 31 | -6.333 | -5.751  | -3.840 | 1.00 | 0.00 |
| ATOM | 475 | CA   | HID | 31 | -7.844 | -5.069  | -5.222 | 1.00 | 0.00 |
| ATOM | 476 | HA   | HID | 31 | -8.457 | -5.677  | -5.887 | 1.00 | 0.00 |
| ATOM | 477 | CB   | HID | 31 | -8.674 | -4.706  | -3.986 | 1.00 | 0.00 |
| ATOM | 478 | HB2  | HID | 31 | -9.347 | -5.514  | -3.699 | 1.00 | 0.00 |
| ATOM | 479 | HB3  | HID | 31 | -8.049 | -4.436  | -3.135 | 1.00 | 0.00 |



|      |     |      |     |    |         |        |        |      |      |
|------|-----|------|-----|----|---------|--------|--------|------|------|
| ATOM | 480 | CG   | HID | 31 | -9.538  | -3.509 | -4.283 | 1.00 | 0.00 |
| ATOM | 481 | ND1  | HID | 31 | -10.609 | -3.569 | -5.161 | 1.00 | 0.00 |
| ATOM | 482 | HD1  | HID | 31 | -10.916 | -4.381 | -5.678 | 1.00 | 0.00 |
| ATOM | 483 | CE1  | HID | 31 | -11.169 | -2.346 | -5.202 | 1.00 | 0.00 |
| ATOM | 484 | HE1  | HID | 31 | -12.034 | -2.216 | -5.853 | 1.00 | 0.00 |
| ATOM | 485 | NE2  | HID | 31 | -10.534 | -1.483 | -4.404 | 1.00 | 0.00 |
| ATOM | 486 | CD2  | HID | 31 | -9.503  | -2.215 | -3.822 | 1.00 | 0.00 |
| ATOM | 487 | HD2  | HID | 31 | -8.824  | -1.735 | -3.117 | 1.00 | 0.00 |
| ATOM | 488 | C    | HID | 31 | -7.391  | -3.801 | -5.937 | 1.00 | 0.00 |
| ATOM | 489 | O    | HID | 31 | -8.124  | -3.203 | -6.700 | 1.00 | 0.00 |
| ATOM | 490 | N    | ILE | 32 | -6.177  | -3.393 | -5.696 | 1.00 | 0.00 |
| ATOM | 491 | H    | ILE | 32 | -5.567  | -3.887 | -5.060 | 1.00 | 0.00 |
| ATOM | 492 | CA   | ILE | 32 | -5.658  | -2.167 | -6.362 | 1.00 | 0.00 |
| ATOM | 493 | HA   | ILE | 32 | -6.494  | -1.512 | -6.606 | 1.00 | 0.00 |
| ATOM | 494 | CB   | ILE | 32 | -4.688  | -1.433 | -5.430 | 1.00 | 0.00 |
| ATOM | 495 | HB   | ILE | 32 | -3.725  | -1.311 | -5.926 | 1.00 | 0.00 |
| ATOM | 496 | CG2  | ILE | 32 | -5.261  | -0.061 | -5.088 | 1.00 | 0.00 |
| ATOM | 497 | HG21 | ILE | 32 | -6.223  | -0.183 | -4.591 | 1.00 | 0.00 |
| ATOM | 498 | HG22 | ILE | 32 | -4.574  | 0.465  | -4.425 | 1.00 | 0.00 |
| ATOM | 499 | HG23 | ILE | 32 | -5.395  | 0.515  | -6.003 | 1.00 | 0.00 |

|      |     |          |    |        |        |        |      |      |
|------|-----|----------|----|--------|--------|--------|------|------|
| ATOM | 500 | CG1 ILE  | 32 | -4.493 | -2.236 | -4.140 | 1.00 | 0.00 |
| ATOM | 501 | HG12 ILE | 32 | -5.466 | -2.479 | -3.714 | 1.00 | 0.00 |
| ATOM | 502 | HG13 ILE | 32 | -3.955 | -3.158 | -4.365 | 1.00 | 0.00 |
| ATOM | 503 | CD1 ILE  | 32 | -3.689 | -1.409 | -3.135 | 1.00 | 0.00 |
| ATOM | 504 | HD11 ILE | 32 | -4.226 | -0.488 | -2.909 | 1.00 | 0.00 |
| ATOM | 505 | HD12 ILE | 32 | -3.552 | -1.983 | -2.219 | 1.00 | 0.00 |
| ATOM | 506 | HD13 ILE | 32 | -2.715 | -1.167 | -3.560 | 1.00 | 0.00 |
| ATOM | 507 | C ILE    | 32 | -4.930 | -2.561 | -7.646 | 1.00 | 0.00 |
| ATOM | 508 | O ILE    | 32 | -5.203 | -2.040 | -8.709 | 1.00 | 0.00 |
| ATOM | 509 | N MET    | 33 | -4.011 | -3.482 | -7.560 | 1.00 | 0.00 |
| ATOM | 510 | H MET    | 33 | -3.778 | -3.922 | -6.681 | 1.00 | 0.00 |
| ATOM | 511 | CA MET   | 33 | -3.274 | -3.911 | -8.781 | 1.00 | 0.00 |
| ATOM | 512 | HA MET   | 33 | -2.762 | -3.061 | -9.232 | 1.00 | 0.00 |
| ATOM | 513 | CB MET   | 33 | -2.231 | -4.965 | -8.403 | 1.00 | 0.00 |
| ATOM | 514 | HB2 MET  | 33 | -2.735 | -5.864 | -8.047 | 1.00 | 0.00 |
| ATOM | 515 | HB3 MET  | 33 | -1.628 | -5.210 | -9.277 | 1.00 | 0.00 |
| ATOM | 516 | CG MET   | 33 | -1.327 | -4.416 | -7.298 | 1.00 | 0.00 |
| ATOM | 517 | HG2 MET  | 33 | -0.927 | -3.447 | -7.596 | 1.00 | 0.00 |
| ATOM | 518 | HG3 MET  | 33 | -1.898 | -4.305 | -6.376 | 1.00 | 0.00 |
| ATOM | 519 | SD MET   | 33 | 0.044  | -5.563 | -7.014 | 1.00 | 0.00 |

|      |     |      |     |    |        |         |         |      |      |
|------|-----|------|-----|----|--------|---------|---------|------|------|
| ATOM | 520 | CE   | MET | 33 | 1.175  | -4.871  | -8.245  | 1.00 | 0.00 |
| ATOM | 521 | HE1  | MET | 33 | 1.384  | -3.829  | -8.003  | 1.00 | 0.00 |
| ATOM | 522 | HE2  | MET | 33 | 2.107  | -5.438  | -8.242  | 1.00 | 0.00 |
| ATOM | 523 | HE3  | MET | 33 | 0.718  | -4.930  | -9.233  | 1.00 | 0.00 |
| ATOM | 524 | C    | MET | 33 | -4.264 | -4.506  | -9.782  | 1.00 | 0.00 |
| ATOM | 525 | O    | MET | 33 | -4.170 | -4.282  | -10.971 | 1.00 | 0.00 |
| ATOM | 526 | N    | GLN | 34 | -5.214 | -5.262  | -9.307  | 1.00 | 0.00 |
| ATOM | 527 | H    | GLN | 34 | -5.297 | -5.450  | -8.318  | 1.00 | 0.00 |
| ATOM | 528 | CA   | GLN | 34 | -6.212 | -5.875  | -10.229 | 1.00 | 0.00 |
| ATOM | 529 | HA   | GLN | 34 | -5.708 | -6.473  | -10.989 | 1.00 | 0.00 |
| ATOM | 530 | CB   | GLN | 34 | -7.149 | -6.785  | -9.432  | 1.00 | 0.00 |
| ATOM | 531 | HB2  | GLN | 34 | -7.501 | -6.258  | -8.546  | 1.00 | 0.00 |
| ATOM | 532 | HB3  | GLN | 34 | -8.001 | -7.062  | -10.052 | 1.00 | 0.00 |
| ATOM | 533 | CG   | GLN | 34 | -6.396 | -8.047  | -9.008  | 1.00 | 0.00 |
| ATOM | 534 | HG2  | GLN | 34 | -6.115 | -8.633  | -9.883  | 1.00 | 0.00 |
| ATOM | 535 | HG3  | GLN | 34 | -5.500 | -7.782  | -8.446  | 1.00 | 0.00 |
| ATOM | 536 | CD   | GLN | 34 | -7.297 | -8.903  | -8.116  | 1.00 | 0.00 |
| ATOM | 537 | OE1  | GLN | 34 | -8.352 | -8.467  | -7.701  | 1.00 | 0.00 |
| ATOM | 538 | NE2  | GLN | 34 | -6.923 | -10.113 | -7.802  | 1.00 | 0.00 |
| ATOM | 539 | HE21 | GLN | 34 | -7.513 | -10.684 | -7.214  | 1.00 | 0.00 |

|      |     |      |     |    |         |         |         |      |      |
|------|-----|------|-----|----|---------|---------|---------|------|------|
| ATOM | 540 | HE22 | GLN | 34 | -6.045  | -10.474 | -8.149  | 1.00 | 0.00 |
| ATOM | 541 | C    | GLN | 34 | -7.029  | -4.776  | -10.911 | 1.00 | 0.00 |
| ATOM | 542 | O    | GLN | 34 | -7.264  | -4.817  | -12.102 | 1.00 | 0.00 |
| ATOM | 543 | N    | ARG | 35 | -7.472  | -3.798  | -10.169 | 1.00 | 0.00 |
| ATOM | 544 | H    | ARG | 35 | -7.284  | -3.756  | -9.178  | 1.00 | 0.00 |
| ATOM | 545 | CA   | ARG | 35 | -8.281  | -2.706  | -10.783 | 1.00 | 0.00 |
| ATOM | 546 | HA   | ARG | 35 | -9.143  | -3.121  | -11.304 | 1.00 | 0.00 |
| ATOM | 547 | CB   | ARG | 35 | -8.779  | -1.765  | -9.686  | 1.00 | 0.00 |
| ATOM | 548 | HB2  | ARG | 35 | -7.998  | -1.633  | -8.937  | 1.00 | 0.00 |
| ATOM | 549 | HB3  | ARG | 35 | -9.030  | -0.799  | -10.122 | 1.00 | 0.00 |
| ATOM | 550 | CG   | ARG | 35 | -10.023 | -2.366  | -9.025  | 1.00 | 0.00 |
| ATOM | 551 | HG2  | ARG | 35 | -10.727 | -2.684  | -9.795  | 1.00 | 0.00 |
| ATOM | 552 | HG3  | ARG | 35 | -9.734  | -3.226  | -8.421  | 1.00 | 0.00 |
| ATOM | 553 | CD   | ARG | 35 | -10.684 | -1.314  | -8.132  | 1.00 | 0.00 |
| ATOM | 554 | HD2  | ARG | 35 | -11.094 | -0.508  | -8.739  | 1.00 | 0.00 |
| ATOM | 555 | HD3  | ARG | 35 | -11.481 | -1.767  | -7.543  | 1.00 | 0.00 |
| ATOM | 556 | NE   | ARG | 35 | -9.669  | -0.743  | -7.203  | 1.00 | 0.00 |
| ATOM | 557 | HE   | ARG | 35 | -8.821  | -1.243  | -6.976  | 1.00 | 0.00 |
| ATOM | 558 | CZ   | ARG | 35 | -9.866  | 0.427   | -6.660  | 1.00 | 0.00 |
| ATOM | 559 | NH1  | ARG | 35 | -10.381 | 1.396   | -7.367  | 1.00 | 0.00 |

|      |     |      |     |    |         |        |         |      |      |
|------|-----|------|-----|----|---------|--------|---------|------|------|
| ATOM | 560 | HH11 | ARG | 35 | -10.626 | 1.236  | -8.334  | 1.00 | 0.00 |
| ATOM | 561 | HH12 | ARG | 35 | -10.532 | 2.300  | -6.944  | 1.00 | 0.00 |
| ATOM | 562 | NH2  | ARG | 35 | -9.546  | 0.629  | -5.412  | 1.00 | 0.00 |
| ATOM | 563 | HH21 | ARG | 35 | -9.146  | -0.123 | -4.869  | 1.00 | 0.00 |
| ATOM | 564 | HH22 | ARG | 35 | -9.700  | 1.535  | -4.995  | 1.00 | 0.00 |
| ATOM | 565 | C    | ARG | 35 | -7.423  | -1.919 | -11.777 | 1.00 | 0.00 |
| ATOM | 566 | O    | ARG | 35 | -7.781  | -1.757 | -12.926 | 1.00 | 0.00 |
| ATOM | 567 | N    | ILE | 36 | -6.298  | -1.424 | -11.343 | 1.00 | 0.00 |
| ATOM | 568 | H    | ILE | 36 | -5.995  | -1.552 | -10.388 | 1.00 | 0.00 |
| ATOM | 569 | CA   | ILE | 36 | -5.424  | -0.642 | -12.263 | 1.00 | 0.00 |
| ATOM | 570 | HA   | ILE | 36 | -5.998  | 0.164  | -12.719 | 1.00 | 0.00 |
| ATOM | 571 | CB   | ILE | 36 | -4.256  | -0.051 | -11.471 | 1.00 | 0.00 |
| ATOM | 572 | HB   | ILE | 36 | -3.622  | 0.533  | -12.138 | 1.00 | 0.00 |
| ATOM | 573 | CG2  | ILE | 36 | -4.800  | 0.853  | -10.362 | 1.00 | 0.00 |
| ATOM | 574 | HG21 | ILE | 36 | -5.433  | 0.269  | -9.695  | 1.00 | 0.00 |
| ATOM | 575 | HG22 | ILE | 36 | -3.969  | 1.275  | -9.796  | 1.00 | 0.00 |
| ATOM | 576 | HG23 | ILE | 36 | -5.385  | 1.659  | -10.804 | 1.00 | 0.00 |
| ATOM | 577 | CG1  | ILE | 36 | -3.433  | -1.185 | -10.854 | 1.00 | 0.00 |
| ATOM | 578 | HG12 | ILE | 36 | -4.105  | -1.943 | -10.452 | 1.00 | 0.00 |
| ATOM | 579 | HG13 | ILE | 36 | -2.799  | -1.632 | -11.621 | 1.00 | 0.00 |

|      |     |      |     |    |        |        |         |      |      |
|------|-----|------|-----|----|--------|--------|---------|------|------|
| ATOM | 580 | CD1  | ILE | 36 | -2.557 | -0.631 | -9.728  | 1.00 | 0.00 |
| ATOM | 581 | HD11 | ILE | 36 | -3.189 | -0.185 | -8.961  | 1.00 | 0.00 |
| ATOM | 582 | HD12 | ILE | 36 | -1.972 | -1.440 | -9.290  | 1.00 | 0.00 |
| ATOM | 583 | HD13 | ILE | 36 | -1.884 | 0.126  | -10.130 | 1.00 | 0.00 |
| ATOM | 584 | C    | ILE | 36 | -4.883 | -1.552 | -13.368 | 1.00 | 0.00 |
| ATOM | 585 | O    | ILE | 36 | -4.368 | -1.090 | -14.366 | 1.00 | 0.00 |
| ATOM | 586 | N    | MET | 37 | -4.995 | -2.842 | -13.202 | 1.00 | 0.00 |
| ATOM | 587 | H    | MET | 37 | -5.419 | -3.240 | -12.376 | 1.00 | 0.00 |
| ATOM | 588 | CA   | MET | 37 | -4.483 | -3.771 | -14.251 | 1.00 | 0.00 |
| ATOM | 589 | HA   | MET | 37 | -3.832 | -3.237 | -14.943 | 1.00 | 0.00 |
| ATOM | 590 | CB   | MET | 37 | -3.680 | -4.895 | -13.594 | 1.00 | 0.00 |
| ATOM | 591 | HB2  | MET | 37 | -4.247 | -5.309 | -12.760 | 1.00 | 0.00 |
| ATOM | 592 | HB3  | MET | 37 | -3.485 | -5.680 | -14.326 | 1.00 | 0.00 |
| ATOM | 593 | CG   | MET | 37 | -2.351 | -4.337 | -13.079 | 1.00 | 0.00 |
| ATOM | 594 | HG2  | MET | 37 | -1.935 | -3.643 | -13.809 | 1.00 | 0.00 |
| ATOM | 595 | HG3  | MET | 37 | -2.510 | -3.818 | -12.134 | 1.00 | 0.00 |
| ATOM | 596 | SD   | MET | 37 | -1.186 | -5.697 | -12.820 | 1.00 | 0.00 |
| ATOM | 597 | CE   | MET | 37 | -2.181 | -6.626 | -11.628 | 1.00 | 0.00 |
| ATOM | 598 | HE1  | MET | 37 | -3.128 | -6.909 | -12.087 | 1.00 | 0.00 |
| ATOM | 599 | HE2  | MET | 37 | -1.642 | -7.525 | -11.326 | 1.00 | 0.00 |

|      |     |     |     |    |        |        |         |      |      |
|------|-----|-----|-----|----|--------|--------|---------|------|------|
| ATOM | 600 | HE3 | MET | 37 | -2.372 | -6.006 | -10.752 | 1.00 | 0.00 |
| ATOM | 601 | C   | MET | 37 | -5.661 | -4.367 | -15.023 | 1.00 | 0.00 |
| ATOM | 602 | O   | MET | 37 | -5.510 | -4.847 | -16.130 | 1.00 | 0.00 |
| ATOM | 603 | N   | GLY | 38 | -6.834 | -4.342 | -14.452 | 1.00 | 0.00 |
| ATOM | 604 | H   | GLY | 38 | -6.968 | -3.946 | -13.533 | 1.00 | 0.00 |
| ATOM | 605 | CA  | GLY | 38 | -8.018 | -4.908 | -15.157 | 1.00 | 0.00 |
| ATOM | 606 | HA2 | GLY | 38 | -7.809 | -5.929 | -15.479 | 1.00 | 0.00 |
| ATOM | 607 | HA3 | GLY | 38 | -8.883 | -4.907 | -14.495 | 1.00 | 0.00 |
| ATOM | 608 | C   | GLY | 38 | -8.330 | -4.052 | -16.387 | 1.00 | 0.00 |
| ATOM | 609 | O   | GLY | 38 | -8.909 | -4.518 | -17.349 | 1.00 | 0.00 |
| ATOM | 610 | N   | GLU | 39 | -7.951 | -2.804 | -16.362 | 1.00 | 0.00 |
| ATOM | 611 | H   | GLU | 39 | -7.471 | -2.411 | -15.565 | 1.00 | 0.00 |
| ATOM | 612 | CA  | GLU | 39 | -8.225 | -1.919 | -17.529 | 1.00 | 0.00 |
| ATOM | 613 | HA  | GLU | 39 | -9.293 | -1.901 | -17.747 | 1.00 | 0.00 |
| ATOM | 614 | CB  | GLU | 39 | -7.766 | -0.495 | -17.209 | 1.00 | 0.00 |
| ATOM | 615 | HB2 | GLU | 39 | -8.227 | -0.165 | -16.278 | 1.00 | 0.00 |
| ATOM | 616 | HB3 | GLU | 39 | -6.681 | -0.478 | -17.103 | 1.00 | 0.00 |
| ATOM | 617 | CG  | GLU | 39 | -8.182 | 0.442  | -18.344 | 1.00 | 0.00 |
| ATOM | 618 | HG2 | GLU | 39 | -7.805 | 0.055  | -19.291 | 1.00 | 0.00 |
| ATOM | 619 | HG3 | GLU | 39 | -9.269 | 0.504  | -18.384 | 1.00 | 0.00 |

|      |     |      |     |    |        |        |         |      |      |
|------|-----|------|-----|----|--------|--------|---------|------|------|
| ATOM | 620 | CD   | GLU | 39 | -7.601 | 1.835  | -18.095 | 1.00 | 0.00 |
| ATOM | 621 | OE1  | GLU | 39 | -6.890 | 1.992  | -17.115 | 1.00 | 0.00 |
| ATOM | 622 | OE2  | GLU | 39 | -7.876 | 2.721  | -18.887 | 1.00 | 0.00 |
| ATOM | 623 | C    | GLU | 39 | -7.467 | -2.438 | -18.752 | 1.00 | 0.00 |
| ATOM | 624 | O    | GLU | 39 | -7.851 | -2.199 | -19.880 | 1.00 | 0.00 |
| ATOM | 625 | N    | GLN | 40 | -6.391 | -3.145 | -18.539 | 1.00 | 0.00 |
| ATOM | 626 | H    | GLN | 40 | -6.063 | -3.347 | -17.605 | 1.00 | 0.00 |
| ATOM | 627 | CA   | GLN | 40 | -5.611 | -3.678 | -19.691 | 1.00 | 0.00 |
| ATOM | 628 | HA   | GLN | 40 | -5.337 | -2.870 | -20.369 | 1.00 | 0.00 |
| ATOM | 629 | CB   | GLN | 40 | -4.331 | -4.341 | -19.178 | 1.00 | 0.00 |
| ATOM | 630 | HB2  | GLN | 40 | -4.580 | -5.051 | -18.389 | 1.00 | 0.00 |
| ATOM | 631 | HB3  | GLN | 40 | -3.840 | -4.868 | -19.997 | 1.00 | 0.00 |
| ATOM | 632 | CG   | GLN | 40 | -3.389 | -3.271 | -18.623 | 1.00 | 0.00 |
| ATOM | 633 | HG2  | GLN | 40 | -3.132 | -2.552 | -19.401 | 1.00 | 0.00 |
| ATOM | 634 | HG3  | GLN | 40 | -3.859 | -2.751 | -17.789 | 1.00 | 0.00 |
| ATOM | 635 | CD   | GLN | 40 | -2.103 | -3.932 | -18.124 | 1.00 | 0.00 |
| ATOM | 636 | OE1  | GLN | 40 | -2.041 | -5.138 | -17.985 | 1.00 | 0.00 |
| ATOM | 637 | NE2  | GLN | 40 | -1.065 | -3.190 | -17.848 | 1.00 | 0.00 |
| ATOM | 638 | HE21 | GLN | 40 | -0.213 | -3.622 | -17.518 | 1.00 | 0.00 |
| ATOM | 639 | HE22 | GLN | 40 | -1.118 | -2.189 | -17.966 | 1.00 | 0.00 |



|      |     |     |     |    |         |        |         |      |      |
|------|-----|-----|-----|----|---------|--------|---------|------|------|
| ATOM | 640 | C   | GLN | 40 | -6.455  | -4.709 | -20.442 | 1.00 | 0.00 |
| ATOM | 641 | O   | GLN | 40 | -6.352  | -4.854 | -21.643 | 1.00 | 0.00 |
| ATOM | 642 | N   | GLU | 41 | -7.290  | -5.427 | -19.741 | 1.00 | 0.00 |
| ATOM | 643 | H   | GLU | 41 | -7.379  | -5.315 | -18.741 | 1.00 | 0.00 |
| ATOM | 644 | CA  | GLU | 41 | -8.142  | -6.447 | -20.416 | 1.00 | 0.00 |
| ATOM | 645 | HA  | GLU | 41 | -7.520  | -7.218 | -20.872 | 1.00 | 0.00 |
| ATOM | 646 | CB  | GLU | 41 | -9.061  | -7.106 | -19.385 | 1.00 | 0.00 |
| ATOM | 647 | HB2 | GLU | 41 | -9.672  | -6.344 | -18.903 | 1.00 | 0.00 |
| ATOM | 648 | HB3 | GLU | 41 | -9.708  | -7.828 | -19.884 | 1.00 | 0.00 |
| ATOM | 649 | CG  | GLU | 41 | -8.215  | -7.823 | -18.331 | 1.00 | 0.00 |
| ATOM | 650 | HG2 | GLU | 41 | -7.581  | -8.566 | -18.816 | 1.00 | 0.00 |
| ATOM | 651 | HG3 | GLU | 41 | -7.590  | -7.097 | -17.811 | 1.00 | 0.00 |
| ATOM | 652 | CD  | GLU | 41 | -9.135  | -8.517 | -17.325 | 1.00 | 0.00 |
| ATOM | 653 | OE1 | GLU | 41 | -10.330 | -8.284 | -17.387 | 1.00 | 0.00 |
| ATOM | 654 | OE2 | GLU | 41 | -8.628  | -9.270 | -16.511 | 1.00 | 0.00 |
| ATOM | 655 | C   | GLU | 41 | -8.987  | -5.770 | -21.497 | 1.00 | 0.00 |
| ATOM | 656 | O   | GLU | 41 | -9.490  | -4.681 | -21.311 | 1.00 | 0.00 |
| ATOM | 657 | N   | GLN | 42 | -9.147  | -6.408 | -22.624 | 1.00 | 0.00 |
| ATOM | 658 | H   | GLN | 42 | -8.730  | -7.314 | -22.787 | 1.00 | 0.00 |
| ATOM | 659 | CA  | GLN | 42 | -9.960  | -5.799 | -23.713 | 1.00 | 0.00 |

|      |     |      |     |    |         |        |         |      |      |
|------|-----|------|-----|----|---------|--------|---------|------|------|
| ATOM | 660 | HA   | GLN | 42 | -9.560  | -4.822 | -23.983 | 1.00 | 0.00 |
| ATOM | 661 | CB   | GLN | 42 | -9.917  | -6.703 | -24.947 | 1.00 | 0.00 |
| ATOM | 662 | HB2  | GLN | 42 | -10.262 | -7.702 | -24.679 | 1.00 | 0.00 |
| ATOM | 663 | HB3  | GLN | 42 | -10.563 | -6.292 | -25.722 | 1.00 | 0.00 |
| ATOM | 664 | CG   | GLN | 42 | -8.482  | -6.783 | -25.470 | 1.00 | 0.00 |
| ATOM | 665 | HG2  | GLN | 42 | -7.828  | -7.225 | -24.718 | 1.00 | 0.00 |
| ATOM | 666 | HG3  | GLN | 42 | -8.444  | -7.382 | -26.380 | 1.00 | 0.00 |
| ATOM | 667 | CD   | GLN | 42 | -7.977  | -5.374 | -25.790 | 1.00 | 0.00 |
| ATOM | 668 | OE1  | GLN | 42 | -8.628  | -4.627 | -26.492 | 1.00 | 0.00 |
| ATOM | 669 | NE2  | GLN | 42 | -6.835  | -4.977 | -25.300 | 1.00 | 0.00 |
| ATOM | 670 | HE21 | GLN | 42 | -6.495  | -4.049 | -25.507 | 1.00 | 0.00 |
| ATOM | 671 | HE22 | GLN | 42 | -6.295  | -5.600 | -24.716 | 1.00 | 0.00 |
| ATOM | 672 | C    | GLN | 42 | -11.407 | -5.642 | -23.243 | 1.00 | 0.00 |
| ATOM | 673 | O    | GLN | 42 | -12.078 | -4.686 | -23.575 | 1.00 | 0.00 |
| ATOM | 674 | N    | TYR | 43 | -11.894 | -6.575 | -22.470 | 1.00 | 0.00 |
| ATOM | 675 | H    | TYR | 43 | -11.342 | -7.373 | -22.188 | 1.00 | 0.00 |
| ATOM | 676 | CA   | TYR | 43 | -13.298 | -6.478 | -21.979 | 1.00 | 0.00 |
| ATOM | 677 | HA   | TYR | 43 | -13.782 | -5.593 | -22.392 | 1.00 | 0.00 |
| ATOM | 678 | CB   | TYR | 43 | -14.082 | -7.716 | -22.422 | 1.00 | 0.00 |
| ATOM | 679 | HB2  | TYR | 43 | -13.620 | -8.608 | -21.998 | 1.00 | 0.00 |

|      |     |     |     |    |         |        |         |      |      |
|------|-----|-----|-----|----|---------|--------|---------|------|------|
| ATOM | 680 | HB3 | TYR | 43 | -15.112 | -7.641 | -22.074 | 1.00 | 0.00 |
| ATOM | 681 | CG  | TYR | 43 | -14.066 | -7.809 | -23.929 | 1.00 | 0.00 |
| ATOM | 682 | CD1 | TYR | 43 | -14.941 | -7.022 | -24.688 | 1.00 | 0.00 |
| ATOM | 683 | HD1 | TYR | 43 | -15.632 | -6.342 | -24.192 | 1.00 | 0.00 |
| ATOM | 684 | CE1 | TYR | 43 | -14.927 | -7.110 | -26.085 | 1.00 | 0.00 |
| ATOM | 685 | HE1 | TYR | 43 | -15.608 | -6.498 | -26.676 | 1.00 | 0.00 |
| ATOM | 686 | CZ  | TYR | 43 | -14.040 | -7.985 | -26.723 | 1.00 | 0.00 |
| ATOM | 687 | OH  | TYR | 43 | -14.027 | -8.071 | -28.101 | 1.00 | 0.00 |
| ATOM | 688 | HH  | TYR | 43 | -14.665 | -7.489 | -28.519 | 1.00 | 0.00 |
| ATOM | 689 | CE2 | TYR | 43 | -13.165 | -8.771 | -25.964 | 1.00 | 0.00 |
| ATOM | 690 | HE2 | TYR | 43 | -12.473 | -9.452 | -26.460 | 1.00 | 0.00 |
| ATOM | 691 | CD2 | TYR | 43 | -13.179 | -8.683 | -24.568 | 1.00 | 0.00 |
| ATOM | 692 | HD2 | TYR | 43 | -12.498 | -9.296 | -23.977 | 1.00 | 0.00 |
| ATOM | 693 | C   | TYR | 43 | -13.298 | -6.397 | -20.451 | 1.00 | 0.00 |
| ATOM | 694 | O   | TYR | 43 | -12.351 | -6.789 | -19.799 | 1.00 | 0.00 |
| ATOM | 695 | N   | ASP | 44 | -14.354 | -5.891 | -19.875 | 1.00 | 0.00 |
| ATOM | 696 | H   | ASP | 44 | -15.145 | -5.564 | -20.410 | 1.00 | 0.00 |
| ATOM | 697 | CA  | ASP | 44 | -14.413 | -5.785 | -18.390 | 1.00 | 0.00 |
| ATOM | 698 | HA  | ASP | 44 | -14.419 | -6.778 | -17.941 | 1.00 | 0.00 |
| ATOM | 699 | CB  | ASP | 44 | -13.185 | -5.026 | -17.881 | 1.00 | 0.00 |

|      |     |     |     |    |         |        |         |      |      |
|------|-----|-----|-----|----|---------|--------|---------|------|------|
| ATOM | 700 | HB2 | ASP | 44 | -13.310 | -4.802 | -16.822 | 1.00 | 0.00 |
| ATOM | 701 | HB3 | ASP | 44 | -12.294 | -5.639 | -18.019 | 1.00 | 0.00 |
| ATOM | 702 | CG  | ASP | 44 | -13.032 | -3.720 | -18.664 | 1.00 | 0.00 |
| ATOM | 703 | OD1 | ASP | 44 | -13.748 | -3.547 | -19.636 | 1.00 | 0.00 |
| ATOM | 704 | OD2 | ASP | 44 | -12.199 | -2.917 | -18.277 | 1.00 | 0.00 |
| ATOM | 705 | C   | ASP | 44 | -15.682 | -5.033 | -17.983 | 1.00 | 0.00 |
| ATOM | 706 | O   | ASP | 44 | -16.389 | -5.430 | -17.079 | 1.00 | 0.00 |
| ATOM | 707 | N   | SER | 45 | -15.977 | -3.947 | -18.645 | 1.00 | 0.00 |
| ATOM | 708 | H   | SER | 45 | -15.394 | -3.609 | -19.397 | 1.00 | 0.00 |
| ATOM | 709 | CA  | SER | 45 | -17.201 | -3.172 | -18.297 | 1.00 | 0.00 |
| ATOM | 710 | HA  | SER | 45 | -17.079 | -2.686 | -17.329 | 1.00 | 0.00 |
| ATOM | 711 | CB  | SER | 45 | -17.440 | -2.096 | -19.358 | 1.00 | 0.00 |
| ATOM | 712 | HB2 | SER | 45 | -18.246 | -1.438 | -19.034 | 1.00 | 0.00 |
| ATOM | 713 | HB3 | SER | 45 | -16.529 | -1.514 | -19.496 | 1.00 | 0.00 |
| ATOM | 714 | OG  | SER | 45 | -17.798 | -2.713 | -20.586 | 1.00 | 0.00 |
| ATOM | 715 | HG  | SER | 45 | -17.948 | -2.038 | -21.252 | 1.00 | 0.00 |
| ATOM | 716 | C   | SER | 45 | -18.404 | -4.114 | -18.245 | 1.00 | 0.00 |
| ATOM | 717 | O   | SER | 45 | -19.302 | -3.947 | -17.444 | 1.00 | 0.00 |
| ATOM | 718 | N   | TYR | 46 | -18.431 | -5.104 | -19.096 | 1.00 | 0.00 |
| ATOM | 719 | H   | TYR | 46 | -17.687 | -5.250 | -19.764 | 1.00 | 0.00 |

|      |     |     |     |    |         |        |         |      |      |
|------|-----|-----|-----|----|---------|--------|---------|------|------|
| ATOM | 720 | CA  | TYR | 46 | -19.577 | -6.055 | -19.097 | 1.00 | 0.00 |
| ATOM | 721 | HA  | TYR | 46 | -20.510 | -5.523 | -19.283 | 1.00 | 0.00 |
| ATOM | 722 | CB  | TYR | 46 | -19.377 | -7.093 | -20.203 | 1.00 | 0.00 |
| ATOM | 723 | HB2 | TYR | 46 | -18.411 | -7.583 | -20.075 | 1.00 | 0.00 |
| ATOM | 724 | HB3 | TYR | 46 | -20.171 | -7.838 | -20.150 | 1.00 | 0.00 |
| ATOM | 725 | CG  | TYR | 46 | -19.419 | -6.408 | -21.548 | 1.00 | 0.00 |
| ATOM | 726 | CD1 | TYR | 46 | -20.611 | -5.834 | -22.004 | 1.00 | 0.00 |
| ATOM | 727 | HD1 | TYR | 46 | -21.509 | -5.883 | -21.388 | 1.00 | 0.00 |
| ATOM | 728 | CE1 | TYR | 46 | -20.651 | -5.198 | -23.251 | 1.00 | 0.00 |
| ATOM | 729 | HE1 | TYR | 46 | -21.579 | -4.752 | -23.606 | 1.00 | 0.00 |
| ATOM | 730 | CZ  | TYR | 46 | -19.497 | -5.135 | -24.041 | 1.00 | 0.00 |
| ATOM | 731 | OH  | TYR | 46 | -19.536 | -4.509 | -25.270 | 1.00 | 0.00 |
| ATOM | 732 | HH  | TYR | 46 | -20.402 | -4.154 | -25.483 | 1.00 | 0.00 |
| ATOM | 733 | CE2 | TYR | 46 | -18.304 | -5.708 | -23.585 | 1.00 | 0.00 |
| ATOM | 734 | HE2 | TYR | 46 | -17.406 | -5.659 | -24.201 | 1.00 | 0.00 |
| ATOM | 735 | CD2 | TYR | 46 | -18.264 | -6.345 | -22.338 | 1.00 | 0.00 |
| ATOM | 736 | HD2 | TYR | 46 | -17.335 | -6.791 | -21.983 | 1.00 | 0.00 |
| ATOM | 737 | C   | TYR | 46 | -19.654 | -6.763 | -17.742 | 1.00 | 0.00 |
| ATOM | 738 | O   | TYR | 46 | -20.719 | -6.942 | -17.185 | 1.00 | 0.00 |
| ATOM | 739 | N   | ASP | 47 | -18.534 | -7.168 | -17.208 | 1.00 | 0.00 |

|      |     |      |     |    |         |         |         |      |      |
|------|-----|------|-----|----|---------|---------|---------|------|------|
| ATOM | 740 | H    | ASP | 47 | -17.644 | -7.023  | -17.664 | 1.00 | 0.00 |
| ATOM | 741 | CA   | ASP | 47 | -18.547 | -7.864  | -15.891 | 1.00 | 0.00 |
| ATOM | 742 | HA   | ASP | 47 | -19.558 | -8.188  | -15.644 | 1.00 | 0.00 |
| ATOM | 743 | CB   | ASP | 47 | -17.642 | -9.096  | -15.956 | 1.00 | 0.00 |
| ATOM | 744 | HB2  | ASP | 47 | -16.648 | -8.804  | -16.296 | 1.00 | 0.00 |
| ATOM | 745 | HB3  | ASP | 47 | -17.569 | -9.545  | -14.965 | 1.00 | 0.00 |
| ATOM | 746 | CG   | ASP | 47 | -18.236 | -10.113 | -16.933 | 1.00 | 0.00 |
| ATOM | 747 | OD1  | ASP | 47 | -19.396 | -9.964  | -17.280 | 1.00 | 0.00 |
| ATOM | 748 | OD2  | ASP | 47 | -17.520 | -11.022 | -17.320 | 1.00 | 0.00 |
| ATOM | 749 | C    | ASP | 47 | -18.035 | -6.914  | -14.806 | 1.00 | 0.00 |
| ATOM | 750 | O    | ASP | 47 | -16.912 | -6.450  | -14.853 | 1.00 | 0.00 |
| ATOM | 751 | N    | ILE | 48 | -18.848 | -6.619  | -13.829 | 1.00 | 0.00 |
| ATOM | 752 | H    | ILE | 48 | -19.782 | -7.001  | -13.782 | 1.00 | 0.00 |
| ATOM | 753 | CA   | ILE | 48 | -18.406 | -5.698  | -12.744 | 1.00 | 0.00 |
| ATOM | 754 | HA   | ILE | 48 | -18.158 | -4.726  | -13.170 | 1.00 | 0.00 |
| ATOM | 755 | CB   | ILE | 48 | -19.534 | -5.535  | -11.723 | 1.00 | 0.00 |
| ATOM | 756 | HB   | ILE | 48 | -19.770 | -6.505  | -11.284 | 1.00 | 0.00 |
| ATOM | 757 | CG2  | ILE | 48 | -19.089 | -4.572  | -10.621 | 1.00 | 0.00 |
| ATOM | 758 | HG21 | ILE | 48 | -18.852 | -3.603  | -11.059 | 1.00 | 0.00 |
| ATOM | 759 | HG22 | ILE | 48 | -19.892 | -4.456  | -9.893  | 1.00 | 0.00 |

|      |     |      |     |    |         |        |         |      |      |
|------|-----|------|-----|----|---------|--------|---------|------|------|
| ATOM | 760 | HG23 | ILE | 48 | -18.204 | -4.972 | -10.124 | 1.00 | 0.00 |
| ATOM | 761 | CG1  | ILE | 48 | -20.776 | -4.974 | -12.419 | 1.00 | 0.00 |
| ATOM | 762 | HG12 | ILE | 48 | -20.576 | -3.957 | -12.756 | 1.00 | 0.00 |
| ATOM | 763 | HG13 | ILE | 48 | -21.025 | -5.598 | -13.278 | 1.00 | 0.00 |
| ATOM | 764 | CD1  | ILE | 48 | -21.950 | -4.965 | -11.438 | 1.00 | 0.00 |
| ATOM | 765 | HD11 | ILE | 48 | -21.702 | -4.341 | -10.579 | 1.00 | 0.00 |
| ATOM | 766 | HD12 | ILE | 48 | -22.835 | -4.566 | -11.933 | 1.00 | 0.00 |
| ATOM | 767 | HD13 | ILE | 48 | -22.150 | -5.983 | -11.101 | 1.00 | 0.00 |
| ATOM | 768 | C    | ILE | 48 | -17.173 | -6.282 | -12.053 | 1.00 | 0.00 |
| ATOM | 769 | O    | ILE | 48 | -16.218 | -5.586 | -11.773 | 1.00 | 0.00 |
| ATOM | 770 | N    | ARG | 49 | -17.186 | -7.558 | -11.774 | 1.00 | 0.00 |
| ATOM | 771 | H    | ARG | 49 | -17.976 | -8.144 | -12.004 | 1.00 | 0.00 |
| ATOM | 772 | CA   | ARG | 49 | -16.015 | -8.185 | -11.101 | 1.00 | 0.00 |
| ATOM | 773 | HA   | ARG | 49 | -15.155 | -7.516 | -11.136 | 1.00 | 0.00 |
| ATOM | 774 | CB   | ARG | 49 | -16.357 | -8.465 | -9.636  | 1.00 | 0.00 |
| ATOM | 775 | HB2  | ARG | 49 | -17.242 | -9.100 | -9.583  | 1.00 | 0.00 |
| ATOM | 776 | HB3  | ARG | 49 | -15.519 | -8.971 | -9.157  | 1.00 | 0.00 |
| ATOM | 777 | CG   | ARG | 49 | -16.634 | -7.143 | -8.916  | 1.00 | 0.00 |
| ATOM | 778 | HG2  | ARG | 49 | -17.392 | -6.583 | -9.463  | 1.00 | 0.00 |
| ATOM | 779 | HG3  | ARG | 49 | -16.990 | -7.347 | -7.906  | 1.00 | 0.00 |

|      |     |      |     |    |         |         |         |      |      |
|------|-----|------|-----|----|---------|---------|---------|------|------|
| ATOM | 780 | CD   | ARG | 49 | -15.345 | -6.321  | -8.846  | 1.00 | 0.00 |
| ATOM | 781 | HD2  | ARG | 49 | -14.548 | -6.907  | -8.386  | 1.00 | 0.00 |
| ATOM | 782 | HD3  | ARG | 49 | -15.038 | -6.014  | -9.846  | 1.00 | 0.00 |
| ATOM | 783 | NE   | ARG | 49 | -15.578 | -5.102  | -8.022  | 1.00 | 0.00 |
| ATOM | 784 | HE   | ARG | 49 | -16.489 | -4.888  | -7.643  | 1.00 | 0.00 |
| ATOM | 785 | CZ   | ARG | 49 | -14.593 | -4.283  | -7.775  | 1.00 | 0.00 |
| ATOM | 786 | NH1  | ARG | 49 | -13.363 | -4.654  | -8.003  | 1.00 | 0.00 |
| ATOM | 787 | HH11 | ARG | 49 | -13.177 | -5.576  | -8.371  | 1.00 | 0.00 |
| ATOM | 788 | HH12 | ARG | 49 | -12.603 | -4.018  | -7.811  | 1.00 | 0.00 |
| ATOM | 789 | NH2  | ARG | 49 | -14.838 | -3.092  | -7.300  | 1.00 | 0.00 |
| ATOM | 790 | HH21 | ARG | 49 | -15.791 | -2.808  | -7.125  | 1.00 | 0.00 |
| ATOM | 791 | HH22 | ARG | 49 | -14.073 | -2.461  | -7.110  | 1.00 | 0.00 |
| ATOM | 792 | C    | ARG | 49 | -15.667 | -9.500  | -11.803 | 1.00 | 0.00 |
| ATOM | 793 | O    | ARG | 49 | -16.534 | -10.218 | -12.260 | 1.00 | 0.00 |
| ATOM | 794 | N    | SER | 50 | -14.405 | -9.819  | -11.894 | 1.00 | 0.00 |
| ATOM | 795 | H    | SER | 50 | -13.679 | -9.227  | -11.518 | 1.00 | 0.00 |
| ATOM | 796 | CA   | SER | 50 | -14.004 | -11.086 | -12.567 | 1.00 | 0.00 |
| ATOM | 797 | HA   | SER | 50 | -14.255 | -11.048 | -13.627 | 1.00 | 0.00 |
| ATOM | 798 | CB   | SER | 50 | -12.492 | -11.279 | -12.429 | 1.00 | 0.00 |
| ATOM | 799 | HB2  | SER | 50 | -12.235 | -11.399 | -11.377 | 1.00 | 0.00 |



|      |     |      |     |    |         |         |         |      |      |
|------|-----|------|-----|----|---------|---------|---------|------|------|
| ATOM | 800 | HB3  | SER | 50 | -12.186 | -12.169 | -12.981 | 1.00 | 0.00 |
| ATOM | 801 | OG   | SER | 50 | -11.821 | -10.144 | -12.953 | 1.00 | 0.00 |
| ATOM | 802 | HG   | SER | 50 | -10.872 | -10.265 | -12.867 | 1.00 | 0.00 |
| ATOM | 803 | C    | SER | 50 | -14.731 | -12.264 | -11.914 | 1.00 | 0.00 |
| ATOM | 804 | O    | SER | 50 | -15.173 | -13.179 | -12.581 | 1.00 | 0.00 |
| ATOM | 805 | N    | THR | 51 | -14.858 | -12.249 | -10.616 | 1.00 | 0.00 |
| ATOM | 806 | H    | THR | 51 | -14.493 | -11.493 | -10.056 | 1.00 | 0.00 |
| ATOM | 807 | CA   | THR | 51 | -15.556 | -13.368 | -9.923  | 1.00 | 0.00 |
| ATOM | 808 | HA   | THR | 51 | -16.254 | -13.860 | -10.600 | 1.00 | 0.00 |
| ATOM | 809 | CB   | THR | 51 | -14.527 | -14.397 | -9.451  | 1.00 | 0.00 |
| ATOM | 810 | HB   | THR | 51 | -13.864 | -14.653 | -10.278 | 1.00 | 0.00 |
| ATOM | 811 | CG2  | THR | 51 | -13.706 | -13.812 | -8.302  | 1.00 | 0.00 |
| ATOM | 812 | HG21 | THR | 51 | -14.368 | -13.557 | -7.475  | 1.00 | 0.00 |
| ATOM | 813 | HG22 | THR | 51 | -12.973 | -14.547 | -7.967  | 1.00 | 0.00 |
| ATOM | 814 | HG23 | THR | 51 | -13.190 | -12.915 | -8.644  | 1.00 | 0.00 |
| ATOM | 815 | OG1  | THR | 51 | -15.198 | -15.569 | -9.008  | 1.00 | 0.00 |
| ATOM | 816 | HG1  | THR | 51 | -14.552 | -16.215 | -8.712  | 1.00 | 0.00 |
| ATOM | 817 | C    | THR | 51 | -16.322 | -12.823 | -8.716  | 1.00 | 0.00 |
| ATOM | 818 | O    | THR | 51 | -15.996 | -11.782 | -8.181  | 1.00 | 0.00 |
| ATOM | 819 | N    | ARG | 52 | -17.338 | -13.518 | -8.283  | 1.00 | 0.00 |

|      |     |      |     |    |         |         |        |      |      |
|------|-----|------|-----|----|---------|---------|--------|------|------|
| ATOM | 820 | H    | ARG | 52 | -17.614 | -14.385 | -8.722 | 1.00 | 0.00 |
| ATOM | 821 | CA   | ARG | 52 | -18.124 | -13.038 | -7.111 | 1.00 | 0.00 |
| ATOM | 822 | HA   | ARG | 52 | -18.538 | -12.051 | -7.313 | 1.00 | 0.00 |
| ATOM | 823 | CB   | ARG | 52 | -19.277 | -14.006 | -6.839 | 1.00 | 0.00 |
| ATOM | 824 | HB2  | ARG | 52 | -18.883 | -15.015 | -6.710 | 1.00 | 0.00 |
| ATOM | 825 | HB3  | ARG | 52 | -19.801 | -13.703 | -5.933 | 1.00 | 0.00 |
| ATOM | 826 | CG   | ARG | 52 | -20.248 | -13.986 | -8.021 | 1.00 | 0.00 |
| ATOM | 827 | HG2  | ARG | 52 | -20.564 | -12.961 | -8.215 | 1.00 | 0.00 |
| ATOM | 828 | HG3  | ARG | 52 | -19.753 | -14.388 | -8.906 | 1.00 | 0.00 |
| ATOM | 829 | CD   | ARG | 52 | -21.473 | -14.843 | -7.689 | 1.00 | 0.00 |
| ATOM | 830 | HD2  | ARG | 52 | -22.005 | -14.427 | -6.834 | 1.00 | 0.00 |
| ATOM | 831 | HD3  | ARG | 52 | -22.144 | -14.891 | -8.546 | 1.00 | 0.00 |
| ATOM | 832 | NE   | ARG | 52 | -21.033 | -16.225 | -7.350 | 1.00 | 0.00 |
| ATOM | 833 | HE   | ARG | 52 | -20.116 | -16.410 | -6.969 | 1.00 | 0.00 |
| ATOM | 834 | CZ   | ARG | 52 | -21.841 | -17.232 | -7.544 | 1.00 | 0.00 |
| ATOM | 835 | NH1  | ARG | 52 | -22.245 | -17.949 | -6.531 | 1.00 | 0.00 |
| ATOM | 836 | HH11 | ARG | 52 | -21.930 | -17.723 | -5.598 | 1.00 | 0.00 |
| ATOM | 837 | HH12 | ARG | 52 | -22.870 | -18.728 | -6.685 | 1.00 | 0.00 |
| ATOM | 838 | NH2  | ARG | 52 | -22.244 | -17.521 | -8.750 | 1.00 | 0.00 |
| ATOM | 839 | HH21 | ARG | 52 | -21.929 | -16.964 | -9.531 | 1.00 | 0.00 |

|      |     |      |     |    |         |         |        |      |      |
|------|-----|------|-----|----|---------|---------|--------|------|------|
| ATOM | 840 | HH22 | ARG | 52 | -22.869 | -18.301 | -8.897 | 1.00 | 0.00 |
| ATOM | 841 | C    | ARG | 52 | -17.217 | -12.969 | -5.881 | 1.00 | 0.00 |
| ATOM | 842 | O    | ARG | 52 | -17.380 | -12.121 | -5.026 | 1.00 | 0.00 |
| ATOM | 843 | N    | SER | 53 | -16.263 | -13.853 | -5.784 | 1.00 | 0.00 |
| ATOM | 844 | H    | SER | 53 | -16.123 | -14.561 | -6.491 | 1.00 | 0.00 |
| ATOM | 845 | CA   | SER | 53 | -15.347 | -13.838 | -4.609 | 1.00 | 0.00 |
| ATOM | 846 | HA   | SER | 53 | -15.910 | -13.991 | -3.689 | 1.00 | 0.00 |
| ATOM | 847 | CB   | SER | 53 | -14.321 | -14.965 | -4.746 | 1.00 | 0.00 |
| ATOM | 848 | HB2  | SER | 53 | -13.761 | -15.064 | -3.816 | 1.00 | 0.00 |
| ATOM | 849 | HB3  | SER | 53 | -14.835 | -15.902 | -4.961 | 1.00 | 0.00 |
| ATOM | 850 | OG   | SER | 53 | -13.426 | -14.663 | -5.807 | 1.00 | 0.00 |
| ATOM | 851 | HG   | SER | 53 | -12.782 | -15.370 | -5.893 | 1.00 | 0.00 |
| ATOM | 852 | C    | SER | 53 | -14.623 | -12.492 | -4.544 | 1.00 | 0.00 |
| ATOM | 853 | O    | SER | 53 | -14.124 | -12.094 | -3.509 | 1.00 | 0.00 |
| ATOM | 854 | N    | SER | 54 | -14.559 | -11.787 | -5.640 | 1.00 | 0.00 |
| ATOM | 855 | H    | SER | 54 | -14.971 | -12.112 | -6.503 | 1.00 | 0.00 |
| ATOM | 856 | CA   | SER | 54 | -13.866 | -10.468 | -5.640 | 1.00 | 0.00 |
| ATOM | 857 | HA   | SER | 54 | -12.799 | -10.602 | -5.460 | 1.00 | 0.00 |
| ATOM | 858 | CB   | SER | 54 | -14.052 | -9.793  | -7.000 | 1.00 | 0.00 |
| ATOM | 859 | HB2  | SER | 54 | -13.733 | -10.473 | -7.790 | 1.00 | 0.00 |

|      |     |     |     |    |         |         |        |      |      |
|------|-----|-----|-----|----|---------|---------|--------|------|------|
| ATOM | 860 | HB3 | SER | 54 | -15.103 | -9.541  | -7.140 | 1.00 | 0.00 |
| ATOM | 861 | OG  | SER | 54 | -13.271 | -8.609  | -7.052 | 1.00 | 0.00 |
| ATOM | 862 | HG  | SER | 54 | -13.388 | -8.186  | -7.906 | 1.00 | 0.00 |
| ATOM | 863 | C   | SER | 54 | -14.460 | -9.580  | -4.545 | 1.00 | 0.00 |
| ATOM | 864 | O   | SER | 54 | -13.777 | -8.769  | -3.952 | 1.00 | 0.00 |
| ATOM | 865 | N   | ASP | 55 | -15.727 | -9.725  | -4.273 | 1.00 | 0.00 |
| ATOM | 866 | H   | ASP | 55 | -16.301 | -10.396 | -4.763 | 1.00 | 0.00 |
| ATOM | 867 | CA  | ASP | 55 | -16.363 | -8.888  | -3.216 | 1.00 | 0.00 |
| ATOM | 868 | HA  | ASP | 55 | -16.261 | -7.831  | -3.459 | 1.00 | 0.00 |
| ATOM | 869 | CB  | ASP | 55 | -17.852 | -9.228  | -3.124 | 1.00 | 0.00 |
| ATOM | 870 | HB2 | ASP | 55 | -17.972 | -10.305 | -3.005 | 1.00 | 0.00 |
| ATOM | 871 | HB3 | ASP | 55 | -18.289 | -8.718  | -2.266 | 1.00 | 0.00 |
| ATOM | 872 | CG  | ASP | 55 | -18.560 | -8.774  | -4.402 | 1.00 | 0.00 |
| ATOM | 873 | OD1 | ASP | 55 | -17.947 | -8.051  | -5.170 | 1.00 | 0.00 |
| ATOM | 874 | OD2 | ASP | 55 | -19.703 | -9.157  | -4.591 | 1.00 | 0.00 |
| ATOM | 875 | C   | ASP | 55 | -15.692 | -9.167  | -1.870 | 1.00 | 0.00 |
| ATOM | 876 | O   | ASP | 55 | -15.690 | -8.337  | -0.983 | 1.00 | 0.00 |
| ATOM | 877 | N   | GLN | 56 | -15.121 | -10.330 | -1.711 | 1.00 | 0.00 |
| ATOM | 878 | H   | GLN | 56 | -15.118 | -11.025 | -2.444 | 1.00 | 0.00 |
| ATOM | 879 | CA  | GLN | 56 | -14.450 | -10.660 | -0.422 | 1.00 | 0.00 |

|      |     |      |     |    |         |         |        |      |      |
|------|-----|------|-----|----|---------|---------|--------|------|------|
| ATOM | 880 | HA   | GLN | 56 | -15.152 | -10.564 | 0.406  | 1.00 | 0.00 |
| ATOM | 881 | CB   | GLN | 56 | -13.942 | -12.102 | -0.467 | 1.00 | 0.00 |
| ATOM | 882 | HB2  | GLN | 56 | -13.224 | -12.210 | -1.281 | 1.00 | 0.00 |
| ATOM | 883 | HB3  | GLN | 56 | -13.457 | -12.347 | 0.478  | 1.00 | 0.00 |
| ATOM | 884 | CG   | GLN | 56 | -15.119 | -13.052 | -0.697 | 1.00 | 0.00 |
| ATOM | 885 | HG2  | GLN | 56 | -15.959 | -12.776 | -0.060 | 1.00 | 0.00 |
| ATOM | 886 | HG3  | GLN | 56 | -15.430 | -13.022 | -1.741 | 1.00 | 0.00 |
| ATOM | 887 | CD   | GLN | 56 | -14.695 | -14.482 | -0.355 | 1.00 | 0.00 |
| ATOM | 888 | OE1  | GLN | 56 | -15.478 | -15.253 | 0.162  | 1.00 | 0.00 |
| ATOM | 889 | NE2  | GLN | 56 | -13.479 | -14.871 | -0.625 | 1.00 | 0.00 |
| ATOM | 890 | HE21 | GLN | 56 | -13.192 | -15.814 | -0.402 | 1.00 | 0.00 |
| ATOM | 891 | HE22 | GLN | 56 | -12.830 | -14.228 | -1.056 | 1.00 | 0.00 |
| ATOM | 892 | C    | GLN | 56 | -13.270 | -9.712  | -0.201 | 1.00 | 0.00 |
| ATOM | 893 | O    | GLN | 56 | -12.967 | -9.332  | 0.912  | 1.00 | 0.00 |
| ATOM | 894 | N    | GLN | 57 | -12.602 | -9.327  | -1.254 | 1.00 | 0.00 |
| ATOM | 895 | H    | GLN | 57 | -12.848 | -9.640  | -2.182 | 1.00 | 0.00 |
| ATOM | 896 | CA   | GLN | 57 | -11.441 | -8.405  | -1.104 | 1.00 | 0.00 |
| ATOM | 897 | HA   | GLN | 57 | -10.595 | -8.931  | -0.660 | 1.00 | 0.00 |
| ATOM | 898 | CB   | GLN | 57 | -11.024 | -7.882  | -2.480 | 1.00 | 0.00 |
| ATOM | 899 | HB2  | GLN | 57 | -11.870 | -7.385  | -2.953 | 1.00 | 0.00 |

|      |     |      |     |    |         |         |        |      |      |
|------|-----|------|-----|----|---------|---------|--------|------|------|
| ATOM | 900 | HB3  | GLN | 57 | -10.203 | -7.174  | -2.368 | 1.00 | 0.00 |
| ATOM | 901 | CG   | GLN | 57 | -10.570 | -9.054  | -3.352 | 1.00 | 0.00 |
| ATOM | 902 | HG2  | GLN | 57 | -9.682  | -9.521  | -2.926 | 1.00 | 0.00 |
| ATOM | 903 | HG3  | GLN | 57 | -11.365 | -9.795  | -3.434 | 1.00 | 0.00 |
| ATOM | 904 | CD   | GLN | 57 | -10.230 | -8.545  | -4.754 | 1.00 | 0.00 |
| ATOM | 905 | OE1  | GLN | 57 | -10.624 | -7.460  | -5.132 | 1.00 | 0.00 |
| ATOM | 906 | NE2  | GLN | 57 | -9.508  | -9.290  | -5.547 | 1.00 | 0.00 |
| ATOM | 907 | HE21 | GLN | 57 | -9.279  | -8.962  | -6.474 | 1.00 | 0.00 |
| ATOM | 908 | HE22 | GLN | 57 | -9.181  | -10.192 | -5.230 | 1.00 | 0.00 |
| ATOM | 909 | C    | GLN | 57 | -11.836 | -7.229  | -0.207 | 1.00 | 0.00 |
| ATOM | 910 | O    | GLN | 57 | -11.107 | -6.844  | 0.685  | 1.00 | 0.00 |
| ATOM | 911 | N    | GLN | 58 | -12.985 | -6.654  | -0.437 | 1.00 | 0.00 |
| ATOM | 912 | H    | GLN | 58 | -13.597 | -6.969  | -1.176 | 1.00 | 0.00 |
| ATOM | 913 | CA   | GLN | 58 | -13.424 | -5.505  | 0.402  | 1.00 | 0.00 |
| ATOM | 914 | HA   | GLN | 58 | -12.842 | -4.616  | 0.159  | 1.00 | 0.00 |
| ATOM | 915 | CB   | GLN | 58 | -14.902 | -5.211  | 0.134  | 1.00 | 0.00 |
| ATOM | 916 | HB2  | GLN | 58 | -15.503 | -6.072  | 0.428  | 1.00 | 0.00 |
| ATOM | 917 | HB3  | GLN | 58 | -15.210 | -4.340  | 0.711  | 1.00 | 0.00 |
| ATOM | 918 | CG   | GLN | 58 | -15.105 | -4.933  | -1.357 | 1.00 | 0.00 |
| ATOM | 919 | HG2  | GLN | 58 | -14.322 | -4.273  | -1.731 | 1.00 | 0.00 |

|      |     |      |     |    |         |         |        |      |      |
|------|-----|------|-----|----|---------|---------|--------|------|------|
| ATOM | 920 | HG3  | GLN | 58 | -15.092 | -5.866  | -1.921 | 1.00 | 0.00 |
| ATOM | 921 | CD   | GLN | 58 | -16.460 | -4.253  | -1.567 | 1.00 | 0.00 |
| ATOM | 922 | OE1  | GLN | 58 | -16.602 | -3.411  | -2.431 | 1.00 | 0.00 |
| ATOM | 923 | NE2  | GLN | 58 | -17.468 | -4.586  | -0.809 | 1.00 | 0.00 |
| ATOM | 924 | HE21 | GLN | 58 | -18.365 | -4.142  | -0.942 | 1.00 | 0.00 |
| ATOM | 925 | HE22 | GLN | 58 | -17.347 | -5.288  | -0.092 | 1.00 | 0.00 |
| ATOM | 926 | C    | GLN | 58 | -13.236 | -5.852  | 1.880  | 1.00 | 0.00 |
| ATOM | 927 | O    | GLN | 58 | -12.804 | -5.035  | 2.669  | 1.00 | 0.00 |
| ATOM | 928 | N    | ARG | 59 | -13.558 | -7.058  | 2.262  | 1.00 | 0.00 |
| ATOM | 929 | H    | ARG | 59 | -13.918 | -7.743  | 1.612  | 1.00 | 0.00 |
| ATOM | 930 | CA   | ARG | 59 | -13.400 | -7.454  | 3.689  | 1.00 | 0.00 |
| ATOM | 931 | HA   | ARG | 59 | -14.136 | -6.941  | 4.308  | 1.00 | 0.00 |
| ATOM | 932 | CB   | ARG | 59 | -13.613 | -8.963  | 3.826  | 1.00 | 0.00 |
| ATOM | 933 | HB2  | ARG | 59 | -12.884 | -9.492  | 3.211  | 1.00 | 0.00 |
| ATOM | 934 | HB3  | ARG | 59 | -13.488 | -9.256  | 4.869  | 1.00 | 0.00 |
| ATOM | 935 | CG   | ARG | 59 | -15.026 | -9.321  | 3.362  | 1.00 | 0.00 |
| ATOM | 936 | HG2  | ARG | 59 | -15.755 | -8.767  | 3.953  | 1.00 | 0.00 |
| ATOM | 937 | HG3  | ARG | 59 | -15.140 | -9.062  | 2.309  | 1.00 | 0.00 |
| ATOM | 938 | CD   | ARG | 59 | -15.257 | -10.823 | 3.545  | 1.00 | 0.00 |
| ATOM | 939 | HD2  | ARG | 59 | -14.468 | -11.390 | 3.051  | 1.00 | 0.00 |

|      |     |      |     |    |         |         |       |      |      |
|------|-----|------|-----|----|---------|---------|-------|------|------|
| ATOM | 940 | HD3  | ARG | 59 | -15.276 | -11.077 | 4.605 | 1.00 | 0.00 |
| ATOM | 941 | NE   | ARG | 59 | -16.566 | -11.200 | 2.940 | 1.00 | 0.00 |
| ATOM | 942 | HE   | ARG | 59 | -16.659 | -11.378 | 1.950 | 1.00 | 0.00 |
| ATOM | 943 | CZ   | ARG | 59 | -17.626 | -11.308 | 3.695 | 1.00 | 0.00 |
| ATOM | 944 | NH1  | ARG | 59 | -17.925 | -12.455 | 4.240 | 1.00 | 0.00 |
| ATOM | 945 | HH11 | ARG | 59 | -17.334 | -13.258 | 4.076 | 1.00 | 0.00 |
| ATOM | 946 | HH12 | ARG | 59 | -18.745 | -12.535 | 4.823 | 1.00 | 0.00 |
| ATOM | 947 | NH2  | ARG | 59 | -18.386 | -10.267 | 3.904 | 1.00 | 0.00 |
| ATOM | 948 | HH21 | ARG | 59 | -18.151 | -9.381  | 3.480 | 1.00 | 0.00 |
| ATOM | 949 | HH22 | ARG | 59 | -19.205 | -10.353 | 4.488 | 1.00 | 0.00 |
| ATOM | 950 | C    | ARG | 59 | -11.995 | -7.090  | 4.168 | 1.00 | 0.00 |
| ATOM | 951 | O    | ARG | 59 | -11.781 | -6.797  | 5.327 | 1.00 | 0.00 |
| ATOM | 952 | N    | CYX | 60 | -11.035 | -7.099  | 3.286 | 1.00 | 0.00 |
| ATOM | 953 | H    | CYX | 60 | -11.202 | -7.339  | 2.319 | 1.00 | 0.00 |
| ATOM | 954 | CA   | CYX | 60 | -9.647  | -6.747  | 3.696 | 1.00 | 0.00 |
| ATOM | 955 | HA   | CYX | 60 | -9.197  | -7.567  | 4.257 | 1.00 | 0.00 |
| ATOM | 956 | CB   | CYX | 60 | -8.800  | -6.486  | 2.447 | 1.00 | 0.00 |
| ATOM | 957 | HB2  | CYX | 60 | -8.549  | -7.435  | 1.972 | 1.00 | 0.00 |
| ATOM | 958 | HB3  | CYX | 60 | -9.363  | -5.868  | 1.748 | 1.00 | 0.00 |
| ATOM | 959 | SG   | CYX | 60 | -7.242  | -5.694  | 2.919 | 1.00 | 0.00 |



|      |     |     |     |    |         |        |       |      |      |
|------|-----|-----|-----|----|---------|--------|-------|------|------|
| ATOM | 960 | C   | CYX | 60 | -9.689  | -5.487 | 4.563 | 1.00 | 0.00 |
| ATOM | 961 | O   | CYX | 60 | -9.777  | -5.556 | 5.774 | 1.00 | 0.00 |
| ATOM | 962 | N   | CYX | 61 | -9.627  | -4.339 | 3.951 | 1.00 | 0.00 |
| ATOM | 963 | H   | CYX | 61 | -9.550  | -4.276 | 2.946 | 1.00 | 0.00 |
| ATOM | 964 | CA  | CYX | 61 | -9.665  | -3.074 | 4.738 | 1.00 | 0.00 |
| ATOM | 965 | HA  | CYX | 61 | -8.693  | -2.887 | 5.196 | 1.00 | 0.00 |
| ATOM | 966 | CB  | CYX | 61 | -10.005 | -1.903 | 3.815 | 1.00 | 0.00 |
| ATOM | 967 | HB2 | CYX | 61 | -10.083 | -2.260 | 2.788 | 1.00 | 0.00 |
| ATOM | 968 | HB3 | CYX | 61 | -10.954 | -1.464 | 4.120 | 1.00 | 0.00 |
| ATOM | 969 | SG  | CYX | 61 | -8.671  | -0.680 | 3.878 | 1.00 | 0.00 |
| ATOM | 970 | C   | CYX | 61 | -10.729 | -3.191 | 5.832 | 1.00 | 0.00 |
| ATOM | 971 | O   | CYX | 61 | -10.542 | -2.740 | 6.944 | 1.00 | 0.00 |
| ATOM | 972 | N   | ASP | 62 | -11.843 | -3.795 | 5.523 | 1.00 | 0.00 |
| ATOM | 973 | H   | ASP | 62 | -12.004 | -4.173 | 4.600 | 1.00 | 0.00 |
| ATOM | 974 | CA  | ASP | 62 | -12.919 | -3.941 | 6.545 | 1.00 | 0.00 |
| ATOM | 975 | HA  | ASP | 62 | -13.249 | -2.961 | 6.888 | 1.00 | 0.00 |
| ATOM | 976 | CB  | ASP | 62 | -14.113 | -4.671 | 5.929 | 1.00 | 0.00 |
| ATOM | 977 | HB2 | ASP | 62 | -13.782 | -5.621 | 5.509 | 1.00 | 0.00 |
| ATOM | 978 | HB3 | ASP | 62 | -14.862 | -4.856 | 6.698 | 1.00 | 0.00 |
| ATOM | 979 | CG  | ASP | 62 | -14.722 | -3.809 | 4.821 | 1.00 | 0.00 |

|      |     |     |     |    |         |         |        |      |      |
|------|-----|-----|-----|----|---------|---------|--------|------|------|
| ATOM | 980 | OD1 | ASP | 62 | -14.368 | -2.643  | 4.743  | 1.00 | 0.00 |
| ATOM | 981 | OD2 | ASP | 62 | -15.531 | -4.327  | 4.069  | 1.00 | 0.00 |
| ATOM | 982 | C   | ASP | 62 | -12.388 | -4.744  | 7.732  | 1.00 | 0.00 |
| ATOM | 983 | O   | ASP | 62 | -12.718 | -4.480  | 8.872  | 1.00 | 0.00 |
| ATOM | 984 | N   | GLU | 63 | -11.564 | -5.720  | 7.476  | 1.00 | 0.00 |
| ATOM | 985 | H   | GLU | 63 | -11.285 | -5.947  | 6.532  | 1.00 | 0.00 |
| ATOM | 986 | CA  | GLU | 63 | -11.007 | -6.535  | 8.591  | 1.00 | 0.00 |
| ATOM | 987 | HA  | GLU | 63 | -11.814 | -6.967  | 9.183  | 1.00 | 0.00 |
| ATOM | 988 | CB  | GLU | 63 | -10.158 | -7.672  | 8.019  | 1.00 | 0.00 |
| ATOM | 989 | HB2 | GLU | 63 | -9.554  | -7.295  | 7.193  | 1.00 | 0.00 |
| ATOM | 990 | HB3 | GLU | 63 | -9.503  | -8.064  | 8.797  | 1.00 | 0.00 |
| ATOM | 991 | CG  | GLU | 63 | -11.073 | -8.788  | 7.513  | 1.00 | 0.00 |
| ATOM | 992 | HG2 | GLU | 63 | -11.750 | -9.093  | 8.311  | 1.00 | 0.00 |
| ATOM | 993 | HG3 | GLU | 63 | -11.653 | -8.426  | 6.664  | 1.00 | 0.00 |
| ATOM | 994 | CD  | GLU | 63 | -10.226 | -9.985  | 7.078  | 1.00 | 0.00 |
| ATOM | 995 | OE1 | GLU | 63 | -9.014  | -9.903  | 7.198  | 1.00 | 0.00 |
| ATOM | 996 | OE2 | GLU | 63 | -10.803 | -10.964 | 6.632  | 1.00 | 0.00 |
| ATOM | 997 | C   | GLU | 63 | -10.139 | -5.642  | 9.478  | 1.00 | 0.00 |
| ATOM | 998 | O   | GLU | 63 | -10.281 | -5.620  | 10.684 | 1.00 | 0.00 |
| ATOM | 999 | N   | LEU | 64 | -9.240  | -4.904  | 8.887  | 1.00 | 0.00 |

|      |      |      |     |    |         |        |        |      |      |
|------|------|------|-----|----|---------|--------|--------|------|------|
| ATOM | 1000 | H    | LEU | 64 | -9.119  | -4.920 | 7.884  | 1.00 | 0.00 |
| ATOM | 1001 | CA   | LEU | 64 | -8.360  | -4.010 | 9.690  | 1.00 | 0.00 |
| ATOM | 1002 | HA   | LEU | 64 | -7.885  | -4.570 | 10.496 | 1.00 | 0.00 |
| ATOM | 1003 | CB   | LEU | 64 | -7.268  | -3.428 | 8.789  | 1.00 | 0.00 |
| ATOM | 1004 | HB2  | LEU | 64 | -7.718  | -2.762 | 8.054  | 1.00 | 0.00 |
| ATOM | 1005 | HB3  | LEU | 64 | -6.555  | -2.870 | 9.397  | 1.00 | 0.00 |
| ATOM | 1006 | CG   | LEU | 64 | -6.542  | -4.565 | 8.068  | 1.00 | 0.00 |
| ATOM | 1007 | HG   | LEU | 64 | -7.233  | -5.068 | 7.391  | 1.00 | 0.00 |
| ATOM | 1008 | CD1  | LEU | 64 | -5.370  | -3.993 | 7.267  | 1.00 | 0.00 |
| ATOM | 1009 | HD11 | LEU | 64 | -4.678  | -3.491 | 7.943  | 1.00 | 0.00 |
| ATOM | 1010 | HD12 | LEU | 64 | -4.851  | -4.803 | 6.753  | 1.00 | 0.00 |
| ATOM | 1011 | HD13 | LEU | 64 | -5.744  | -3.279 | 6.534  | 1.00 | 0.00 |
| ATOM | 1012 | CD2  | LEU | 64 | -6.014  | -5.568 | 9.095  | 1.00 | 0.00 |
| ATOM | 1013 | HD21 | LEU | 64 | -6.847  | -5.976 | 9.667  | 1.00 | 0.00 |
| ATOM | 1014 | HD22 | LEU | 64 | -5.497  | -6.378 | 8.580  | 1.00 | 0.00 |
| ATOM | 1015 | HD23 | LEU | 64 | -5.321  | -5.067 | 9.770  | 1.00 | 0.00 |
| ATOM | 1016 | C    | LEU | 64 | -9.187  | -2.867 | 10.287 | 1.00 | 0.00 |
| ATOM | 1017 | O    | LEU | 64 | -8.676  | -2.030 | 11.003 | 1.00 | 0.00 |
| ATOM | 1018 | N    | ASN | 65 | -10.461 | -2.823 | 10.001 | 1.00 | 0.00 |
| ATOM | 1019 | H    | ASN | 65 | -10.897 | -3.515 | 9.409  | 1.00 | 0.00 |

|      |      |      |     |    |         |        |        |      |      |
|------|------|------|-----|----|---------|--------|--------|------|------|
| ATOM | 1020 | CA   | ASN | 65 | -11.311 | -1.731 | 10.558 | 1.00 | 0.00 |
| ATOM | 1021 | HA   | ASN | 65 | -10.686 | -0.919 | 10.930 | 1.00 | 0.00 |
| ATOM | 1022 | CB   | ASN | 65 | -12.223 | -1.182 | 9.459  | 1.00 | 0.00 |
| ATOM | 1023 | HB2  | ASN | 65 | -12.909 | -1.958 | 9.118  | 1.00 | 0.00 |
| ATOM | 1024 | HB3  | ASN | 65 | -12.793 | -0.331 | 9.831  | 1.00 | 0.00 |
| ATOM | 1025 | CG   | ASN | 65 | -11.377 | -0.722 | 8.273  | 1.00 | 0.00 |
| ATOM | 1026 | OD1  | ASN | 65 | -11.893 | -0.735 | 7.074  | 1.00 | 0.00 |
| ATOM | 1027 | ND2  | ASN | 65 | -10.232 | -0.347 | 8.436  | 1.00 | 0.00 |
| ATOM | 1028 | HD21 | ASN | 65 | -9.684  | -0.046 | 7.642  | 1.00 | 0.00 |
| ATOM | 1029 | HD22 | ASN | 65 | -9.834  | -0.339 | 9.364  | 1.00 | 0.00 |
| ATOM | 1030 | C    | ASN | 65 | -12.170 | -2.281 | 11.699 | 1.00 | 0.00 |
| ATOM | 1031 | O    | ASN | 65 | -12.810 | -1.540 | 12.417 | 1.00 | 0.00 |
| ATOM | 1032 | N    | GLU | 66 | -12.192 | -3.575 | 11.871 | 1.00 | 0.00 |
| ATOM | 1033 | H    | GLU | 66 | -11.663 | -4.201 | 11.280 | 1.00 | 0.00 |
| ATOM | 1034 | CA   | GLU | 66 | -13.016 | -4.164 | 12.966 | 1.00 | 0.00 |
| ATOM | 1035 | HA   | GLU | 66 | -13.191 | -3.426 | 13.748 | 1.00 | 0.00 |
| ATOM | 1036 | CB   | GLU | 66 | -14.367 | -4.607 | 12.401 | 1.00 | 0.00 |
| ATOM | 1037 | HB2  | GLU | 66 | -14.216 | -5.428 | 11.700 | 1.00 | 0.00 |
| ATOM | 1038 | HB3  | GLU | 66 | -15.010 | -4.940 | 13.216 | 1.00 | 0.00 |
| ATOM | 1039 | CG   | GLU | 66 | -15.028 | -3.433 | 11.677 | 1.00 | 0.00 |

|      |      |     |     |    |         |         |        |      |      |
|------|------|-----|-----|----|---------|---------|--------|------|------|
| ATOM | 1040 | HG2 | GLU | 66 | -15.284 | -2.659  | 12.400 | 1.00 | 0.00 |
| ATOM | 1041 | HG3 | GLU | 66 | -14.338 | -3.026  | 10.938 | 1.00 | 0.00 |
| ATOM | 1042 | CD  | GLU | 66 | -16.299 | -3.916  | 10.976 | 1.00 | 0.00 |
| ATOM | 1043 | OE1 | GLU | 66 | -16.487 | -5.120  | 10.898 | 1.00 | 0.00 |
| ATOM | 1044 | OE2 | GLU | 66 | -17.062 | -3.076  | 10.529 | 1.00 | 0.00 |
| ATOM | 1045 | C   | GLU | 66 | -12.296 | -5.375  | 13.567 | 1.00 | 0.00 |
| ATOM | 1046 | O   | GLU | 66 | -12.417 | -5.659  | 14.741 | 1.00 | 0.00 |
| ATOM | 1047 | N   | MET | 67 | -11.552 | -6.094  | 12.772 | 1.00 | 0.00 |
| ATOM | 1048 | H   | MET | 67 | -11.444 | -5.869  | 11.793 | 1.00 | 0.00 |
| ATOM | 1049 | CA  | MET | 67 | -10.834 | -7.287  | 13.305 | 1.00 | 0.00 |
| ATOM | 1050 | HA  | MET | 67 | -11.499 | -7.880  | 13.933 | 1.00 | 0.00 |
| ATOM | 1051 | CB  | MET | 67 | -10.358 | -8.157  | 12.140 | 1.00 | 0.00 |
| ATOM | 1052 | HB2 | MET | 67 | -10.528 | -7.633  | 11.200 | 1.00 | 0.00 |
| ATOM | 1053 | HB3 | MET | 67 | -9.294  | -8.365  | 12.252 | 1.00 | 0.00 |
| ATOM | 1054 | CG  | MET | 67 | -11.137 | -9.474  | 12.137 | 1.00 | 0.00 |
| ATOM | 1055 | HG2 | MET | 67 | -11.557 | -9.657  | 13.126 | 1.00 | 0.00 |
| ATOM | 1056 | HG3 | MET | 67 | -11.942 | -9.425  | 11.404 | 1.00 | 0.00 |
| ATOM | 1057 | SD  | MET | 67 | -10.022 | -10.832 | 11.704 | 1.00 | 0.00 |
| ATOM | 1058 | CE  | MET | 67 | -9.912  | -10.478 | 9.933  | 1.00 | 0.00 |
| ATOM | 1059 | HE1 | MET | 67 | -9.504  | -9.478  | 9.786  | 1.00 | 0.00 |

|      |      |     |     |    |         |         |        |      |      |
|------|------|-----|-----|----|---------|---------|--------|------|------|
| ATOM | 1060 | HE2 | MET | 67 | -9.259  | -11.210 | 9.456  | 1.00 | 0.00 |
| ATOM | 1061 | HE3 | MET | 67 | -10.905 | -10.534 | 9.488  | 1.00 | 0.00 |
| ATOM | 1062 | C   | MET | 67 | -9.629  | -6.835  | 14.129 | 1.00 | 0.00 |
| ATOM | 1063 | O   | MET | 67 | -9.647  | -6.865  | 15.344 | 1.00 | 0.00 |
| ATOM | 1064 | N   | GLU | 68 | -8.581  | -6.419  | 13.478 | 1.00 | 0.00 |
| ATOM | 1065 | H   | GLU | 68 | -8.560  | -6.395  | 12.468 | 1.00 | 0.00 |
| ATOM | 1066 | CA  | GLU | 68 | -7.371  | -5.967  | 14.220 | 1.00 | 0.00 |
| ATOM | 1067 | HA  | GLU | 68 | -7.165  | -6.639  | 15.054 | 1.00 | 0.00 |
| ATOM | 1068 | CB  | GLU | 68 | -6.165  | -5.973  | 13.279 | 1.00 | 0.00 |
| ATOM | 1069 | HB2 | GLU | 68 | -6.256  | -5.155  | 12.565 | 1.00 | 0.00 |
| ATOM | 1070 | HB3 | GLU | 68 | -5.250  | -5.849  | 13.859 | 1.00 | 0.00 |
| ATOM | 1071 | CG  | GLU | 68 | -6.114  | -7.303  | 12.525 | 1.00 | 0.00 |
| ATOM | 1072 | HG2 | GLU | 68 | -5.909  | -8.112  | 13.227 | 1.00 | 0.00 |
| ATOM | 1073 | HG3 | GLU | 68 | -7.072  | -7.481  | 12.037 | 1.00 | 0.00 |
| ATOM | 1074 | CD  | GLU | 68 | -5.007  | -7.251  | 11.470 | 1.00 | 0.00 |
| ATOM | 1075 | OE1 | GLU | 68 | -4.438  | -6.187  | 11.288 | 1.00 | 0.00 |
| ATOM | 1076 | OE2 | GLU | 68 | -4.746  | -8.277  | 10.862 | 1.00 | 0.00 |
| ATOM | 1077 | C   | GLU | 68 | -7.594  | -4.551  | 14.756 | 1.00 | 0.00 |
| ATOM | 1078 | O   | GLU | 68 | -6.712  | -3.953  | 15.339 | 1.00 | 0.00 |
| ATOM | 1079 | N   | ASN | 69 | -8.766  | -4.010  | 14.565 | 1.00 | 0.00 |

|      |      |      |     |    |         |        |        |      |      |
|------|------|------|-----|----|---------|--------|--------|------|------|
| ATOM | 1080 | H    | ASN | 69 | -9.506  | -4.500 | 14.083 | 1.00 | 0.00 |
| ATOM | 1081 | CA   | ASN | 69 | -9.039  | -2.632 | 15.065 | 1.00 | 0.00 |
| ATOM | 1082 | HA   | ASN | 69 | -9.963  | -2.249 | 14.633 | 1.00 | 0.00 |
| ATOM | 1083 | CB   | ASN | 69 | -9.187  | -2.663 | 16.588 | 1.00 | 0.00 |
| ATOM | 1084 | HB2  | ASN | 69 | -8.253  | -2.982 | 17.052 | 1.00 | 0.00 |
| ATOM | 1085 | HB3  | ASN | 69 | -9.459  | -1.676 | 16.961 | 1.00 | 0.00 |
| ATOM | 1086 | CG   | ASN | 69 | -10.287 | -3.652 | 16.974 | 1.00 | 0.00 |
| ATOM | 1087 | OD1  | ASN | 69 | -11.222 | -3.864 | 16.226 | 1.00 | 0.00 |
| ATOM | 1088 | ND2  | ASN | 69 | -10.216 | -4.273 | 18.120 | 1.00 | 0.00 |
| ATOM | 1089 | HD21 | ASN | 69 | -10.939 | -4.928 | 18.382 | 1.00 | 0.00 |
| ATOM | 1090 | HD22 | ASN | 69 | -9.438  | -4.096 | 18.740 | 1.00 | 0.00 |
| ATOM | 1091 | C    | ASN | 69 | -7.876  | -1.714 | 14.682 | 1.00 | 0.00 |
| ATOM | 1092 | O    | ASN | 69 | -7.619  | -0.720 | 15.332 | 1.00 | 0.00 |
| ATOM | 1093 | N    | THR | 70 | -7.173  | -2.041 | 13.634 | 1.00 | 0.00 |
| ATOM | 1094 | H    | THR | 70 | -7.384  | -2.867 | 13.091 | 1.00 | 0.00 |
| ATOM | 1095 | CA   | THR | 70 | -6.025  | -1.189 | 13.208 | 1.00 | 0.00 |
| ATOM | 1096 | HA   | THR | 70 | -5.158  | -1.373 | 13.842 | 1.00 | 0.00 |
| ATOM | 1097 | CB   | THR | 70 | -5.652  | -1.523 | 11.761 | 1.00 | 0.00 |
| ATOM | 1098 | HB   | THR | 70 | -4.643  | -1.165 | 11.555 | 1.00 | 0.00 |
| ATOM | 1099 | CG2  | THR | 70 | -5.707  | -3.038 | 11.553 | 1.00 | 0.00 |

|      |      |      |     |    |        |        |        |      |      |
|------|------|------|-----|----|--------|--------|--------|------|------|
| ATOM | 1100 | HG21 | THR | 70 | -6.715 | -3.398 | 11.759 | 1.00 | 0.00 |
| ATOM | 1101 | HG22 | THR | 70 | -5.441 | -3.274 | 10.522 | 1.00 | 0.00 |
| ATOM | 1102 | HG23 | THR | 70 | -5.003 | -3.524 | 12.229 | 1.00 | 0.00 |
| ATOM | 1103 | OG1  | THR | 70 | -6.566 | -0.888 | 10.878 | 1.00 | 0.00 |
| ATOM | 1104 | HG1  | THR | 70 | -6.332 | -1.098 | 9.971  | 1.00 | 0.00 |
| ATOM | 1105 | C    | THR | 70 | -6.420 | 0.286  | 13.305 | 1.00 | 0.00 |
| ATOM | 1106 | O    | THR | 70 | -7.586 | 0.628  | 13.312 | 1.00 | 0.00 |
| ATOM | 1107 | N    | GLN | 71 | -5.457 | 1.165  | 13.381 | 1.00 | 0.00 |
| ATOM | 1108 | H    | GLN | 71 | -4.485 | 0.889  | 13.376 | 1.00 | 0.00 |
| ATOM | 1109 | CA   | GLN | 71 | -5.780 | 2.617  | 13.478 | 1.00 | 0.00 |
| ATOM | 1110 | HA   | GLN | 71 | -6.399 | 2.923  | 12.635 | 1.00 | 0.00 |
| ATOM | 1111 | CB   | GLN | 71 | -6.550 | 2.883  | 14.772 | 1.00 | 0.00 |
| ATOM | 1112 | HB2  | GLN | 71 | -7.490 | 2.332  | 14.756 | 1.00 | 0.00 |
| ATOM | 1113 | HB3  | GLN | 71 | -5.953 | 2.558  | 15.624 | 1.00 | 0.00 |
| ATOM | 1114 | CG   | GLN | 71 | -6.839 | 4.382  | 14.893 | 1.00 | 0.00 |
| ATOM | 1115 | HG2  | GLN | 71 | -5.927 | 4.956  | 14.730 | 1.00 | 0.00 |
| ATOM | 1116 | HG3  | GLN | 71 | -7.592 | 4.682  | 14.164 | 1.00 | 0.00 |
| ATOM | 1117 | CD   | GLN | 71 | -7.367 | 4.689  | 16.297 | 1.00 | 0.00 |
| ATOM | 1118 | OE1  | GLN | 71 | -6.766 | 4.309  | 17.282 | 1.00 | 0.00 |
| ATOM | 1119 | NE2  | GLN | 71 | -8.475 | 5.366  | 16.429 | 1.00 | 0.00 |



|      |      |      |     |    |        |       |        |      |      |
|------|------|------|-----|----|--------|-------|--------|------|------|
| ATOM | 1120 | HE21 | GLN | 71 | -8.830 | 5.572 | 17.352 | 1.00 | 0.00 |
| ATOM | 1121 | HE22 | GLN | 71 | -8.972 | 5.680 | 15.608 | 1.00 | 0.00 |
| ATOM | 1122 | C    | GLN | 71 | -4.483 | 3.430 | 13.480 | 1.00 | 0.00 |
| ATOM | 1123 | O    | GLN | 71 | -4.427 | 4.527 | 12.960 | 1.00 | 0.00 |
| ATOM | 1124 | N    | GLY | 72 | -3.441 | 2.904 | 14.065 | 1.00 | 0.00 |
| ATOM | 1125 | H    | GLY | 72 | -3.479 | 1.993 | 14.501 | 1.00 | 0.00 |
| ATOM | 1126 | CA   | GLY | 72 | -2.152 | 3.651 | 14.101 | 1.00 | 0.00 |
| ATOM | 1127 | HA2  | GLY | 72 | -2.310 | 4.679 | 13.775 | 1.00 | 0.00 |
| ATOM | 1128 | HA3  | GLY | 72 | -1.750 | 3.648 | 15.114 | 1.00 | 0.00 |
| ATOM | 1129 | C    | GLY | 72 | -1.144 | 2.981 | 13.164 | 1.00 | 0.00 |
| ATOM | 1130 | O    | GLY | 72 | -1.282 | 1.826 | 12.811 | 1.00 | 0.00 |
| ATOM | 1131 | N    | CYX | 73 | -0.130 | 3.696 | 12.761 | 1.00 | 0.00 |
| ATOM | 1132 | H    | CYX | 73 | -0.010 | 4.656 | 13.051 | 1.00 | 0.00 |
| ATOM | 1133 | CA   | CYX | 73 | 0.886  | 3.102 | 11.848 | 1.00 | 0.00 |
| ATOM | 1134 | HA   | CYX | 73 | 1.708  | 3.800 | 11.691 | 1.00 | 0.00 |
| ATOM | 1135 | CB   | CYX | 73 | 1.445  | 1.821 | 12.470 | 1.00 | 0.00 |
| ATOM | 1136 | HB2  | CYX | 73 | 0.840  | 1.540 | 13.332 | 1.00 | 0.00 |
| ATOM | 1137 | HB3  | CYX | 73 | 1.421  | 1.018 | 11.733 | 1.00 | 0.00 |
| ATOM | 1138 | SG   | CYX | 73 | 3.135  | 2.116 | 13.049 | 1.00 | 0.00 |
| ATOM | 1139 | C    | CYX | 73 | 0.235  | 2.775 | 10.501 | 1.00 | 0.00 |

|      |      |     |     |    |        |       |        |      |      |
|------|------|-----|-----|----|--------|-------|--------|------|------|
| ATOM | 1140 | O   | CYX | 73 | 0.820  | 2.123 | 9.659  | 1.00 | 0.00 |
| ATOM | 1141 | N   | MET | 74 | -0.972 | 3.224 | 10.292 | 1.00 | 0.00 |
| ATOM | 1142 | H   | MET | 74 | -1.463 | 3.767 | 10.987 | 1.00 | 0.00 |
| ATOM | 1143 | CA  | MET | 74 | -1.660 | 2.939 | 9.002  | 1.00 | 0.00 |
| ATOM | 1144 | HA  | MET | 74 | -2.024 | 1.911 | 8.986  | 1.00 | 0.00 |
| ATOM | 1145 | CB  | MET | 74 | -2.854 | 3.884 | 8.841  | 1.00 | 0.00 |
| ATOM | 1146 | HB2 | MET | 74 | -2.497 | 4.909 | 8.744  | 1.00 | 0.00 |
| ATOM | 1147 | HB3 | MET | 74 | -3.418 | 3.610 | 7.949  | 1.00 | 0.00 |
| ATOM | 1148 | CG  | MET | 74 | -3.758 | 3.772 | 10.071 | 1.00 | 0.00 |
| ATOM | 1149 | HG2 | MET | 74 | -3.899 | 2.722 | 10.330 | 1.00 | 0.00 |
| ATOM | 1150 | HG3 | MET | 74 | -3.303 | 4.295 | 10.912 | 1.00 | 0.00 |
| ATOM | 1151 | SD  | MET | 74 | -5.367 | 4.517 | 9.707  | 1.00 | 0.00 |
| ATOM | 1152 | CE  | MET | 74 | -6.237 | 2.987 | 9.285  | 1.00 | 0.00 |
| ATOM | 1153 | HE1 | MET | 74 | -6.221 | 2.311 | 10.141 | 1.00 | 0.00 |
| ATOM | 1154 | HE2 | MET | 74 | -7.269 | 3.216 | 9.022  | 1.00 | 0.00 |
| ATOM | 1155 | HE3 | MET | 74 | -5.744 | 2.510 | 8.438  | 1.00 | 0.00 |
| ATOM | 1156 | C   | MET | 74 | -0.679 | 3.152 | 7.847  | 1.00 | 0.00 |
| ATOM | 1157 | O   | MET | 74 | -0.453 | 2.270 | 7.042  | 1.00 | 0.00 |
| ATOM | 1158 | N   | CYX | 75 | -0.093 | 4.315 | 7.760  | 1.00 | 0.00 |
| ATOM | 1159 | H   | CYX | 75 | -0.274 | 5.054 | 8.424  | 1.00 | 0.00 |

|      |      |     |     |    |       |       |        |      |      |
|------|------|-----|-----|----|-------|-------|--------|------|------|
| ATOM | 1160 | CA  | CYX | 75 | 0.873 | 4.578 | 6.657  | 1.00 | 0.00 |
| ATOM | 1161 | HA  | CYX | 75 | 0.344 | 4.701 | 5.712  | 1.00 | 0.00 |
| ATOM | 1162 | CB  | CYX | 75 | 1.649 | 5.863 | 6.954  | 1.00 | 0.00 |
| ATOM | 1163 | HB2 | CYX | 75 | 0.956 | 6.641 | 7.272  | 1.00 | 0.00 |
| ATOM | 1164 | HB3 | CYX | 75 | 2.373 | 5.675 | 7.747  | 1.00 | 0.00 |
| ATOM | 1165 | SG  | CYX | 75 | 2.471 | 6.432 | 5.446  | 1.00 | 0.00 |
| ATOM | 1166 | C   | CYX | 75 | 1.849 | 3.407 | 6.544  | 1.00 | 0.00 |
| ATOM | 1167 | O   | CYX | 75 | 2.058 | 2.861 | 5.478  | 1.00 | 0.00 |
| ATOM | 1168 | N   | GLU | 76 | 2.448 | 3.011 | 7.635  | 1.00 | 0.00 |
| ATOM | 1169 | H   | GLU | 76 | 2.282 | 3.456 | 8.526  | 1.00 | 0.00 |
| ATOM | 1170 | CA  | GLU | 76 | 3.406 | 1.871 | 7.583  | 1.00 | 0.00 |
| ATOM | 1171 | HA  | GLU | 76 | 4.249 | 2.115 | 6.937  | 1.00 | 0.00 |
| ATOM | 1172 | CB  | GLU | 76 | 3.936 | 1.581 | 8.989  | 1.00 | 0.00 |
| ATOM | 1173 | HB2 | GLU | 76 | 3.109 | 1.293 | 9.638  | 1.00 | 0.00 |
| ATOM | 1174 | HB3 | GLU | 76 | 4.661 | 0.768 | 8.944  | 1.00 | 0.00 |
| ATOM | 1175 | CG  | GLU | 76 | 4.610 | 2.835 | 9.548  | 1.00 | 0.00 |
| ATOM | 1176 | HG2 | GLU | 76 | 5.362 | 3.187 | 8.842  | 1.00 | 0.00 |
| ATOM | 1177 | HG3 | GLU | 76 | 3.862 | 3.612 | 9.701  | 1.00 | 0.00 |
| ATOM | 1178 | CD  | GLU | 76 | 5.281 | 2.504 | 10.883 | 1.00 | 0.00 |
| ATOM | 1179 | OE1 | GLU | 76 | 5.274 | 1.341 | 11.255 | 1.00 | 0.00 |

|      |      |     |     |    |        |        |        |      |      |
|------|------|-----|-----|----|--------|--------|--------|------|------|
| ATOM | 1180 | OE2 | GLU | 76 | 5.789  | 3.417  | 11.511 | 1.00 | 0.00 |
| ATOM | 1181 | C   | GLU | 76 | 2.685  | 0.635  | 7.042  | 1.00 | 0.00 |
| ATOM | 1182 | O   | GLU | 76 | 3.301  | -0.306 | 6.580  | 1.00 | 0.00 |
| ATOM | 1183 | N   | ALA | 77 | 1.380  | 0.636  | 7.087  | 1.00 | 0.00 |
| ATOM | 1184 | H   | ALA | 77 | 0.862  | 1.414  | 7.468  | 1.00 | 0.00 |
| ATOM | 1185 | CA  | ALA | 77 | 0.618  | -0.533 | 6.568  | 1.00 | 0.00 |
| ATOM | 1186 | HA  | ALA | 77 | 1.087  | -1.481 | 6.835  | 1.00 | 0.00 |
| ATOM | 1187 | CB  | ALA | 77 | -0.803 | -0.513 | 7.136  | 1.00 | 0.00 |
| ATOM | 1188 | HB1 | ALA | 77 | -1.288 | 0.425  | 6.869  | 1.00 | 0.00 |
| ATOM | 1189 | HB2 | ALA | 77 | -1.371 | -1.347 | 6.723  | 1.00 | 0.00 |
| ATOM | 1190 | HB3 | ALA | 77 | -0.762 | -0.605 | 8.221  | 1.00 | 0.00 |
| ATOM | 1191 | C   | ALA | 77 | 0.562  | -0.454 | 5.043  | 1.00 | 0.00 |
| ATOM | 1192 | O   | ALA | 77 | 1.020  | -1.341 | 4.349  | 1.00 | 0.00 |
| ATOM | 1193 | N   | LEU | 78 | 0.012  | 0.603  | 4.513  | 1.00 | 0.00 |
| ATOM | 1194 | H   | LEU | 78 | -0.370 | 1.346  | 5.080  | 1.00 | 0.00 |
| ATOM | 1195 | CA  | LEU | 78 | -0.060 | 0.737  | 3.032  | 1.00 | 0.00 |
| ATOM | 1196 | HA  | LEU | 78 | -0.706 | -0.036 | 2.615  | 1.00 | 0.00 |
| ATOM | 1197 | CB  | LEU | 78 | -0.636 | 2.106  | 2.666  | 1.00 | 0.00 |
| ATOM | 1198 | HB2 | LEU | 78 | -1.594 | 2.243  | 3.167  | 1.00 | 0.00 |
| ATOM | 1199 | HB3 | LEU | 78 | 0.054  | 2.888  | 2.983  | 1.00 | 0.00 |

|      |      |      |     |    |        |        |        |      |      |
|------|------|------|-----|----|--------|--------|--------|------|------|
| ATOM | 1200 | CG   | LEU | 78 | -0.836 | 2.186  | 1.153  | 1.00 | 0.00 |
| ATOM | 1201 | HG   | LEU | 78 | 0.074  | 1.861  | 0.648  | 1.00 | 0.00 |
| ATOM | 1202 | CD1  | LEU | 78 | -1.998 | 1.279  | 0.743  | 1.00 | 0.00 |
| ATOM | 1203 | HD11 | LEU | 78 | -2.908 | 1.603  | 1.247  | 1.00 | 0.00 |
| ATOM | 1204 | HD12 | LEU | 78 | -2.141 | 1.336  | -0.336 | 1.00 | 0.00 |
| ATOM | 1205 | HD13 | LEU | 78 | -1.774 | 0.250  | 1.026  | 1.00 | 0.00 |
| ATOM | 1206 | CD2  | LEU | 78 | -1.151 | 3.629  | 0.754  | 1.00 | 0.00 |
| ATOM | 1207 | HD21 | LEU | 78 | -0.323 | 4.275  | 1.045  | 1.00 | 0.00 |
| ATOM | 1208 | HD22 | LEU | 78 | -1.293 | 3.685  | -0.325 | 1.00 | 0.00 |
| ATOM | 1209 | HD23 | LEU | 78 | -2.061 | 3.955  | 1.258  | 1.00 | 0.00 |
| ATOM | 1210 | C    | LEU | 78 | 1.350  | 0.604  | 2.456  | 1.00 | 0.00 |
| ATOM | 1211 | O    | LEU | 78 | 1.573  | -0.096 | 1.489  | 1.00 | 0.00 |
| ATOM | 1212 | N    | GLN | 79 | 2.304  | 1.269  | 3.049  | 1.00 | 0.00 |
| ATOM | 1213 | H    | GLN | 79 | 2.124  | 1.852  | 3.854  | 1.00 | 0.00 |
| ATOM | 1214 | CA   | GLN | 79 | 3.700  | 1.178  | 2.542  | 1.00 | 0.00 |
| ATOM | 1215 | HA   | GLN | 79 | 3.771  | 1.624  | 1.550  | 1.00 | 0.00 |
| ATOM | 1216 | CB   | GLN | 79 | 4.640  | 1.933  | 3.486  | 1.00 | 0.00 |
| ATOM | 1217 | HB2  | GLN | 79 | 4.511  | 1.560  | 4.502  | 1.00 | 0.00 |
| ATOM | 1218 | HB3  | GLN | 79 | 5.672  | 1.779  | 3.171  | 1.00 | 0.00 |
| ATOM | 1219 | CG   | GLN | 79 | 4.312  | 3.427  | 3.445  | 1.00 | 0.00 |

|      |      |      |     |    |       |        |       |      |      |
|------|------|------|-----|----|-------|--------|-------|------|------|
| ATOM | 1220 | HG2  | GLN | 79 | 4.483 | 3.823  | 2.444 | 1.00 | 0.00 |
| ATOM | 1221 | HG3  | GLN | 79 | 3.274 | 3.595  | 3.729 | 1.00 | 0.00 |
| ATOM | 1222 | CD   | GLN | 79 | 5.216 | 4.174  | 4.428 | 1.00 | 0.00 |
| ATOM | 1223 | OE1  | GLN | 79 | 5.439 | 5.448  | 4.252 | 1.00 | 0.00 |
| ATOM | 1224 | NE2  | GLN | 79 | 5.726 | 3.592  | 5.365 | 1.00 | 0.00 |
| ATOM | 1225 | HE21 | GLN | 79 | 6.321 | 4.097  | 6.006 | 1.00 | 0.00 |
| ATOM | 1226 | HE22 | GLN | 79 | 5.553 | 2.605  | 5.498 | 1.00 | 0.00 |
| ATOM | 1227 | C    | GLN | 79 | 4.115 | -0.290 | 2.476 | 1.00 | 0.00 |
| ATOM | 1228 | O    | GLN | 79 | 4.679 | -0.744 | 1.501 | 1.00 | 0.00 |
| ATOM | 1229 | N    | GLN | 80 | 3.832 | -1.040 | 3.505 | 1.00 | 0.00 |
| ATOM | 1230 | H    | GLN | 80 | 3.360 | -0.673 | 4.318 | 1.00 | 0.00 |
| ATOM | 1231 | CA   | GLN | 80 | 4.205 | -2.482 | 3.497 | 1.00 | 0.00 |
| ATOM | 1232 | HA   | GLN | 80 | 5.290 | -2.591 | 3.478 | 1.00 | 0.00 |
| ATOM | 1233 | CB   | GLN | 80 | 3.668 | -3.158 | 4.760 | 1.00 | 0.00 |
| ATOM | 1234 | HB2  | GLN | 80 | 3.992 | -2.599 | 5.638 | 1.00 | 0.00 |
| ATOM | 1235 | HB3  | GLN | 80 | 2.579 | -3.181 | 4.726 | 1.00 | 0.00 |
| ATOM | 1236 | CG   | GLN | 80 | 4.205 | -4.588 | 4.840 | 1.00 | 0.00 |
| ATOM | 1237 | HG2  | GLN | 80 | 3.745 | -5.118 | 5.674 | 1.00 | 0.00 |
| ATOM | 1238 | HG3  | GLN | 80 | 4.000 | -5.123 | 3.913 | 1.00 | 0.00 |
| ATOM | 1239 | CD   | GLN | 80 | 5.719 | -4.553 | 5.059 | 1.00 | 0.00 |

|      |      |      |     |    |        |        |        |      |      |
|------|------|------|-----|----|--------|--------|--------|------|------|
| ATOM | 1240 | OE1  | GLN | 80 | 6.206  | -3.826 | 5.902  | 1.00 | 0.00 |
| ATOM | 1241 | NE2  | GLN | 80 | 6.489  | -5.313 | 4.329  | 1.00 | 0.00 |
| ATOM | 1242 | HE21 | GLN | 80 | 7.489  | -5.296 | 4.468  | 1.00 | 0.00 |
| ATOM | 1243 | HE22 | GLN | 80 | 6.081  | -5.916 | 3.628  | 1.00 | 0.00 |
| ATOM | 1244 | C    | GLN | 80 | 3.595  | -3.149 | 2.263  | 1.00 | 0.00 |
| ATOM | 1245 | O    | GLN | 80 | 4.260  | -3.868 | 1.543  | 1.00 | 0.00 |
| ATOM | 1246 | N    | ILE | 81 | 2.338  | -2.910 | 2.010  | 1.00 | 0.00 |
| ATOM | 1247 | H    | ILE | 81 | 1.780  | -2.312 | 2.602  | 1.00 | 0.00 |
| ATOM | 1248 | CA   | ILE | 81 | 1.691  | -3.525 | 0.818  | 1.00 | 0.00 |
| ATOM | 1249 | HA   | ILE | 81 | 1.560  | -4.594 | 0.986  | 1.00 | 0.00 |
| ATOM | 1250 | CB   | ILE | 81 | 0.326  | -2.874 | 0.588  | 1.00 | 0.00 |
| ATOM | 1251 | HB   | ILE | 81 | 0.450  | -1.796 | 0.492  | 1.00 | 0.00 |
| ATOM | 1252 | CG2  | ILE | 81 | -0.297 | -3.431 | -0.693 | 1.00 | 0.00 |
| ATOM | 1253 | HG21 | ILE | 81 | -0.421 | -4.510 | -0.598 | 1.00 | 0.00 |
| ATOM | 1254 | HG22 | ILE | 81 | -1.269 | -2.967 | -0.856 | 1.00 | 0.00 |
| ATOM | 1255 | HG23 | ILE | 81 | 0.355  | -3.215 | -1.539 | 1.00 | 0.00 |
| ATOM | 1256 | CG1  | ILE | 81 | -0.593 | -3.178 | 1.773  | 1.00 | 0.00 |
| ATOM | 1257 | HG12 | ILE | 81 | -0.635 | -4.256 | 1.932  | 1.00 | 0.00 |
| ATOM | 1258 | HG13 | ILE | 81 | -0.203 | -2.694 | 2.668  | 1.00 | 0.00 |
| ATOM | 1259 | CD1  | ILE | 81 | -1.999 | -2.650 | 1.479  | 1.00 | 0.00 |

|      |      |      |     |    |        |        |        |      |      |
|------|------|------|-----|----|--------|--------|--------|------|------|
| ATOM | 1260 | HD11 | ILE | 81 | -2.389 | -3.134 | 0.584  | 1.00 | 0.00 |
| ATOM | 1261 | HD12 | ILE | 81 | -2.653 | -2.867 | 2.323  | 1.00 | 0.00 |
| ATOM | 1262 | HD13 | ILE | 81 | -1.957 | -1.573 | 1.320  | 1.00 | 0.00 |
| ATOM | 1263 | C    | ILE | 81 | 2.581  | -3.298 | -0.404 | 1.00 | 0.00 |
| ATOM | 1264 | O    | ILE | 81 | 3.073  | -4.231 | -1.009 | 1.00 | 0.00 |
| ATOM | 1265 | N    | MET | 82 | 2.798  | -2.064 | -0.769 | 1.00 | 0.00 |
| ATOM | 1266 | H    | MET | 82 | 2.394  | -1.285 | -0.270 | 1.00 | 0.00 |
| ATOM | 1267 | CA   | MET | 82 | 3.662  | -1.777 | -1.947 | 1.00 | 0.00 |
| ATOM | 1268 | HA   | MET | 82 | 3.132  | -2.007 | -2.871 | 1.00 | 0.00 |
| ATOM | 1269 | CB   | MET | 82 | 4.036  | -0.293 | -1.954 | 1.00 | 0.00 |
| ATOM | 1270 | HB2  | MET | 82 | 4.691  | -0.079 | -1.109 | 1.00 | 0.00 |
| ATOM | 1271 | HB3  | MET | 82 | 4.553  | -0.053 | -2.883 | 1.00 | 0.00 |
| ATOM | 1272 | CG   | MET | 82 | 2.767  | 0.554  | -1.843 | 1.00 | 0.00 |
| ATOM | 1273 | HG2  | MET | 82 | 2.324  | 0.428  | -0.855 | 1.00 | 0.00 |
| ATOM | 1274 | HG3  | MET | 82 | 3.010  | 1.604  | -2.001 | 1.00 | 0.00 |
| ATOM | 1275 | SD   | MET | 82 | 1.578  | 0.023  | -3.100 | 1.00 | 0.00 |
| ATOM | 1276 | CE   | MET | 82 | 2.563  | 0.479  | -4.549 | 1.00 | 0.00 |
| ATOM | 1277 | HE1  | MET | 82 | 3.504  | -0.072 | -4.538 | 1.00 | 0.00 |
| ATOM | 1278 | HE2  | MET | 82 | 2.011  | 0.234  | -5.456 | 1.00 | 0.00 |
| ATOM | 1279 | HE3  | MET | 82 | 2.769  | 1.549  | -4.527 | 1.00 | 0.00 |



|      |      |     |     |    |       |        |        |      |      |
|------|------|-----|-----|----|-------|--------|--------|------|------|
| ATOM | 1280 | C   | MET | 82 | 4.932 | -2.622 | -1.861 | 1.00 | 0.00 |
| ATOM | 1281 | O   | MET | 82 | 5.293 | -3.317 | -2.788 | 1.00 | 0.00 |
| ATOM | 1282 | N   | GLU | 83 | 5.608 | -2.573 | -0.749 | 1.00 | 0.00 |
| ATOM | 1283 | H   | GLU | 83 | 5.312 | -2.001 | 0.028  | 1.00 | 0.00 |
| ATOM | 1284 | CA  | GLU | 83 | 6.853 | -3.376 | -0.600 | 1.00 | 0.00 |
| ATOM | 1285 | HA  | GLU | 83 | 7.532 | -3.180 | -1.430 | 1.00 | 0.00 |
| ATOM | 1286 | CB  | GLU | 83 | 7.554 | -2.993 | 0.706  | 1.00 | 0.00 |
| ATOM | 1287 | HB2 | GLU | 83 | 6.861 | -3.111 | 1.539  | 1.00 | 0.00 |
| ATOM | 1288 | HB3 | GLU | 83 | 8.418 | -3.640 | 0.859  | 1.00 | 0.00 |
| ATOM | 1289 | CG  | GLU | 83 | 8.015 | -1.536 | 0.628  | 1.00 | 0.00 |
| ATOM | 1290 | HG2 | GLU | 83 | 8.646 | -1.400 | -0.251 | 1.00 | 0.00 |
| ATOM | 1291 | HG3 | GLU | 83 | 7.145 | -0.884 | 0.555  | 1.00 | 0.00 |
| ATOM | 1292 | CD  | GLU | 83 | 8.811 | -1.185 | 1.886  | 1.00 | 0.00 |
| ATOM | 1293 | OE1 | GLU | 83 | 8.879 | -2.018 | 2.773  | 1.00 | 0.00 |
| ATOM | 1294 | OE2 | GLU | 83 | 9.341 | -0.087 | 1.940  | 1.00 | 0.00 |
| ATOM | 1295 | C   | GLU | 83 | 6.493 | -4.862 | -0.571 | 1.00 | 0.00 |
| ATOM | 1296 | O   | GLU | 83 | 7.341 | -5.720 | -0.713 | 1.00 | 0.00 |
| ATOM | 1297 | N   | ASN | 84 | 5.238 | -5.169 | -0.392 | 1.00 | 0.00 |
| ATOM | 1298 | H   | ASN | 84 | 4.530 | -4.460 | -0.273 | 1.00 | 0.00 |
| ATOM | 1299 | CA  | ASN | 84 | 4.819 | -6.597 | -0.358 | 1.00 | 0.00 |

|      |      |      |     |    |       |        |        |      |      |
|------|------|------|-----|----|-------|--------|--------|------|------|
| ATOM | 1300 | HA   | ASN | 84 | 5.557 | -7.195 | 0.178  | 1.00 | 0.00 |
| ATOM | 1301 | CB   | ASN | 84 | 3.474 | -6.719 | 0.362  | 1.00 | 0.00 |
| ATOM | 1302 | HB2  | ASN | 84 | 3.517 | -6.220 | 1.330  | 1.00 | 0.00 |
| ATOM | 1303 | HB3  | ASN | 84 | 2.681 | -6.276 | -0.240 | 1.00 | 0.00 |
| ATOM | 1304 | CG   | ASN | 84 | 3.149 | -8.196 | 0.588  | 1.00 | 0.00 |
| ATOM | 1305 | OD1  | ASN | 84 | 3.770 | -8.850 | 1.402  | 1.00 | 0.00 |
| ATOM | 1306 | ND2  | ASN | 84 | 2.194 | -8.755 | -0.104 | 1.00 | 0.00 |
| ATOM | 1307 | HD21 | ASN | 84 | 1.974 | -9.731 | 0.040  | 1.00 | 0.00 |
| ATOM | 1308 | HD22 | ASN | 84 | 1.679 | -8.210 | -0.781 | 1.00 | 0.00 |
| ATOM | 1309 | C    | ASN | 84 | 4.682 | -7.120 | -1.789 | 1.00 | 0.00 |
| ATOM | 1310 | O    | ASN | 84 | 4.731 | -8.310 | -2.031 | 1.00 | 0.00 |
| ATOM | 1311 | N    | GLN | 85 | 4.509 | -6.242 | -2.740 | 1.00 | 0.00 |
| ATOM | 1312 | H    | GLN | 85 | 4.464 | -5.251 | -2.550 | 1.00 | 0.00 |
| ATOM | 1313 | CA   | GLN | 85 | 4.371 | -6.698 | -4.152 | 1.00 | 0.00 |
| ATOM | 1314 | HA   | GLN | 85 | 5.177 | -7.386 | -4.409 | 1.00 | 0.00 |
| ATOM | 1315 | CB   | GLN | 85 | 3.035 | -7.425 | -4.324 | 1.00 | 0.00 |
| ATOM | 1316 | HB2  | GLN | 85 | 2.915 | -8.160 | -3.528 | 1.00 | 0.00 |
| ATOM | 1317 | HB3  | GLN | 85 | 2.219 | -6.704 | -4.278 | 1.00 | 0.00 |
| ATOM | 1318 | CG   | GLN | 85 | 3.012 | -8.134 | -5.680 | 1.00 | 0.00 |
| ATOM | 1319 | HG2  | GLN | 85 | 3.118 | -7.410 | -6.488 | 1.00 | 0.00 |

|      |      |      |     |    |       |        |        |      |      |
|------|------|------|-----|----|-------|--------|--------|------|------|
| ATOM | 1320 | HG3  | GLN | 85 | 3.820 | -8.864 | -5.740 | 1.00 | 0.00 |
| ATOM | 1321 | CD   | GLN | 85 | 1.679 | -8.865 | -5.850 | 1.00 | 0.00 |
| ATOM | 1322 | OE1  | GLN | 85 | 0.977 | -9.105 | -4.888 | 1.00 | 0.00 |
| ATOM | 1323 | NE2  | GLN | 85 | 1.298 | -9.232 | -7.043 | 1.00 | 0.00 |
| ATOM | 1324 | HE21 | GLN | 85 | 0.419 | -9.715 | -7.163 | 1.00 | 0.00 |
| ATOM | 1325 | HE22 | GLN | 85 | 1.884 | -9.032 | -7.841 | 1.00 | 0.00 |
| ATOM | 1326 | C    | GLN | 85 | 4.417 | -5.491 | -5.095 | 1.00 | 0.00 |
| ATOM | 1327 | O    | GLN | 85 | 3.599 | -5.356 | -5.982 | 1.00 | 0.00 |
| ATOM | 1328 | N    | CYX | 86 | 5.371 | -4.616 | -4.916 | 1.00 | 0.00 |
| ATOM | 1329 | H    | CYX | 86 | 6.058 | -4.718 | -4.182 | 1.00 | 0.00 |
| ATOM | 1330 | CA   | CYX | 86 | 5.464 | -3.427 | -5.812 | 1.00 | 0.00 |
| ATOM | 1331 | HA   | CYX | 86 | 4.482 | -3.184 | -6.218 | 1.00 | 0.00 |
| ATOM | 1332 | CB   | CYX | 86 | 5.977 | -2.223 | -5.019 | 1.00 | 0.00 |
| ATOM | 1333 | HB2  | CYX | 86 | 6.181 | -1.398 | -5.702 | 1.00 | 0.00 |
| ATOM | 1334 | HB3  | CYX | 86 | 5.223 | -1.917 | -4.295 | 1.00 | 0.00 |
| ATOM | 1335 | SG   | CYX | 86 | 7.529 | -2.657 | -4.195 | 1.00 | 0.00 |
| ATOM | 1336 | C    | CYX | 86 | 6.430 | -3.729 | -6.958 | 1.00 | 0.00 |
| ATOM | 1337 | O    | CYX | 86 | 6.543 | -2.974 | -7.903 | 1.00 | 0.00 |
| ATOM | 1338 | N    | ASP | 87 | 7.132 | -4.828 | -6.881 | 1.00 | 0.00 |
| ATOM | 1339 | H    | ASP | 87 | 7.045 | -5.460 | -6.098 | 1.00 | 0.00 |

|      |      |     |     |    |       |        |         |      |      |
|------|------|-----|-----|----|-------|--------|---------|------|------|
| ATOM | 1340 | CA  | ASP | 87 | 8.091 | -5.177 | -7.966  | 1.00 | 0.00 |
| ATOM | 1341 | HA  | ASP | 87 | 8.979 | -4.547 | -7.904  | 1.00 | 0.00 |
| ATOM | 1342 | CB  | ASP | 87 | 8.518 | -6.639 | -7.817  | 1.00 | 0.00 |
| ATOM | 1343 | HB2 | ASP | 87 | 7.647 | -7.251 | -7.581  | 1.00 | 0.00 |
| ATOM | 1344 | HB3 | ASP | 87 | 8.962 | -6.985 | -8.751  | 1.00 | 0.00 |
| ATOM | 1345 | CG  | ASP | 87 | 9.545 | -6.759 | -6.689  | 1.00 | 0.00 |
| ATOM | 1346 | OD1 | ASP | 87 | 9.978 | -5.730 | -6.196  | 1.00 | 0.00 |
| ATOM | 1347 | OD2 | ASP | 87 | 9.881 | -7.877 | -6.337  | 1.00 | 0.00 |
| ATOM | 1348 | C   | ASP | 87 | 7.419 | -4.979 | -9.326  | 1.00 | 0.00 |
| ATOM | 1349 | O   | ASP | 87 | 7.977 | -4.379 | -10.224 | 1.00 | 0.00 |
| ATOM | 1350 | N   | ARG | 88 | 6.225 | -5.481 | -9.487  | 1.00 | 0.00 |
| ATOM | 1351 | H   | ARG | 88 | 5.756 | -5.982 | -8.746  | 1.00 | 0.00 |
| ATOM | 1352 | CA  | ARG | 88 | 5.520 | -5.323 | -10.790 | 1.00 | 0.00 |
| ATOM | 1353 | HA  | ARG | 88 | 6.123 | -5.737 | -11.599 | 1.00 | 0.00 |
| ATOM | 1354 | CB  | ARG | 88 | 4.186 | -6.072 | -10.742 | 1.00 | 0.00 |
| ATOM | 1355 | HB2 | ARG | 88 | 3.601 | -5.719 | -9.893  | 1.00 | 0.00 |
| ATOM | 1356 | HB3 | ARG | 88 | 3.634 | -5.891 | -11.664 | 1.00 | 0.00 |
| ATOM | 1357 | CG  | ARG | 88 | 4.448 | -7.572 | -10.591 | 1.00 | 0.00 |
| ATOM | 1358 | HG2 | ARG | 88 | 5.038 | -7.925 | -11.437 | 1.00 | 0.00 |
| ATOM | 1359 | HG3 | ARG | 88 | 4.995 | -7.754 | -9.666  | 1.00 | 0.00 |

|      |      |      |     |    |       |         |         |      |      |
|------|------|------|-----|----|-------|---------|---------|------|------|
| ATOM | 1360 | CD   | ARG | 88 | 3.116 | -8.322  | -10.551 | 1.00 | 0.00 |
| ATOM | 1361 | HD2  | ARG | 88 | 2.455 | -7.877  | -9.808  | 1.00 | 0.00 |
| ATOM | 1362 | HD3  | ARG | 88 | 2.636 | -8.290  | -11.529 | 1.00 | 0.00 |
| ATOM | 1363 | NE   | ARG | 88 | 3.356 | -9.745  | -10.184 | 1.00 | 0.00 |
| ATOM | 1364 | HE   | ARG | 88 | 3.068 | -10.116 | -9.289  | 1.00 | 0.00 |
| ATOM | 1365 | CZ   | ARG | 88 | 3.950 | -10.546 | -11.028 | 1.00 | 0.00 |
| ATOM | 1366 | NH1  | ARG | 88 | 3.243 | -11.357 | -11.765 | 1.00 | 0.00 |
| ATOM | 1367 | HH11 | ARG | 88 | 2.237 | -11.364 | -11.681 | 1.00 | 0.00 |
| ATOM | 1368 | HH12 | ARG | 88 | 3.705 | -11.975 | -12.417 | 1.00 | 0.00 |
| ATOM | 1369 | NH2  | ARG | 88 | 5.251 | -10.533 | -11.134 | 1.00 | 0.00 |
| ATOM | 1370 | HH21 | ARG | 88 | 5.795 | -9.903  | -10.562 | 1.00 | 0.00 |
| ATOM | 1371 | HH22 | ARG | 88 | 5.708 | -11.154 | -11.787 | 1.00 | 0.00 |
| ATOM | 1372 | C    | ARG | 88 | 5.261 | -3.838  | -11.058 | 1.00 | 0.00 |
| ATOM | 1373 | O    | ARG | 88 | 4.905 | -3.449  | -12.152 | 1.00 | 0.00 |
| ATOM | 1374 | N    | LEU | 89 | 5.440 | -3.007  | -10.069 | 1.00 | 0.00 |
| ATOM | 1375 | H    | LEU | 89 | 5.736 | -3.323  | -9.156  | 1.00 | 0.00 |
| ATOM | 1376 | CA   | LEU | 89 | 5.205 | -1.549  | -10.271 | 1.00 | 0.00 |
| ATOM | 1377 | HA   | LEU | 89 | 4.178 | -1.373  | -10.589 | 1.00 | 0.00 |
| ATOM | 1378 | CB   | LEU | 89 | 5.445 | -0.804  | -8.956  | 1.00 | 0.00 |
| ATOM | 1379 | HB2  | LEU | 89 | 4.958 | -1.338  | -8.140  | 1.00 | 0.00 |

|      |      |          |    |       |        |         |      |      |
|------|------|----------|----|-------|--------|---------|------|------|
| ATOM | 1380 | HB3 LEU  | 89 | 6.516 | -0.745 | -8.763  | 1.00 | 0.00 |
| ATOM | 1381 | CG LEU   | 89 | 4.867 | 0.608  | -9.058  | 1.00 | 0.00 |
| ATOM | 1382 | HG LEU   | 89 | 5.281 | 1.108  | -9.934  | 1.00 | 0.00 |
| ATOM | 1383 | CD1 LEU  | 89 | 3.345 | 0.527  | -9.189  | 1.00 | 0.00 |
| ATOM | 1384 | HD11 LEU | 89 | 2.931 | 0.027  | -8.314  | 1.00 | 0.00 |
| ATOM | 1385 | HD12 LEU | 89 | 2.932 | 1.533  | -9.262  | 1.00 | 0.00 |
| ATOM | 1386 | HD13 LEU | 89 | 3.087 | -0.037 | -10.085 | 1.00 | 0.00 |
| ATOM | 1387 | CD2 LEU  | 89 | 5.226 | 1.401  | -7.801  | 1.00 | 0.00 |
| ATOM | 1388 | HD21 LEU | 89 | 6.310 | 1.459  | -7.705  | 1.00 | 0.00 |
| ATOM | 1389 | HD22 LEU | 89 | 4.814 | 2.407  | -7.875  | 1.00 | 0.00 |
| ATOM | 1390 | HD23 LEU | 89 | 4.811 | 0.902  | -6.925  | 1.00 | 0.00 |
| ATOM | 1391 | C LEU    | 89 | 6.165 | -1.020 | -11.339 | 1.00 | 0.00 |
| ATOM | 1392 | O LEU    | 89 | 5.982 | 0.055  | -11.874 | 1.00 | 0.00 |
| ATOM | 1393 | N GLN    | 90 | 7.188 | -1.768 | -11.652 | 1.00 | 0.00 |
| ATOM | 1394 | H GLN    | 90 | 7.347 | -2.664 | -11.212 | 1.00 | 0.00 |
| ATOM | 1395 | CA GLN   | 90 | 8.158 | -1.307 | -12.685 | 1.00 | 0.00 |
| ATOM | 1396 | HA GLN   | 90 | 8.801 | -0.526 | -12.279 | 1.00 | 0.00 |
| ATOM | 1397 | CB GLN   | 90 | 9.034 | -2.483 | -13.122 | 1.00 | 0.00 |
| ATOM | 1398 | HB2 GLN  | 90 | 8.406 | -3.352 | -13.319 | 1.00 | 0.00 |
| ATOM | 1399 | HB3 GLN  | 90 | 9.577 | -2.216 | -14.029 | 1.00 | 0.00 |

|      |      |      |     |    |        |        |         |      |      |
|------|------|------|-----|----|--------|--------|---------|------|------|
| ATOM | 1400 | CG   | GLN | 90 | 10.032 | -2.817 | -12.010 | 1.00 | 0.00 |
| ATOM | 1401 | HG2  | GLN | 90 | 10.604 | -1.930 | -11.737 | 1.00 | 0.00 |
| ATOM | 1402 | HG3  | GLN | 90 | 9.510  | -3.197 | -11.132 | 1.00 | 0.00 |
| ATOM | 1403 | CD   | GLN | 90 | 11.003 | -3.891 | -12.504 | 1.00 | 0.00 |
| ATOM | 1404 | OE1  | GLN | 90 | 10.778 | -4.505 | -13.528 | 1.00 | 0.00 |
| ATOM | 1405 | NE2  | GLN | 90 | 12.080 | -4.147 | -11.813 | 1.00 | 0.00 |
| ATOM | 1406 | HE21 | GLN | 90 | 12.726 | -4.855 | -12.133 | 1.00 | 0.00 |
| ATOM | 1407 | HE22 | GLN | 90 | 12.263 | -3.637 | -10.961 | 1.00 | 0.00 |
| ATOM | 1408 | C    | GLN | 90 | 7.396  | -0.764 | -13.894 | 1.00 | 0.00 |
| ATOM | 1409 | O    | GLN | 90 | 7.894  | 0.057  | -14.638 | 1.00 | 0.00 |
| ATOM | 1410 | N    | ASP | 91 | 6.188  | -1.216 | -14.098 | 1.00 | 0.00 |
| ATOM | 1411 | H    | ASP | 91 | 5.767  | -1.898 | -13.483 | 1.00 | 0.00 |
| ATOM | 1412 | CA   | ASP | 91 | 5.394  | -0.727 | -15.259 | 1.00 | 0.00 |
| ATOM | 1413 | HA   | ASP | 91 | 5.953  | -0.865 | -16.185 | 1.00 | 0.00 |
| ATOM | 1414 | CB   | ASP | 91 | 4.089  | -1.518 | -15.354 | 1.00 | 0.00 |
| ATOM | 1415 | HB2  | ASP | 91 | 3.556  | -1.455 | -14.405 | 1.00 | 0.00 |
| ATOM | 1416 | HB3  | ASP | 91 | 3.468  | -1.102 | -16.147 | 1.00 | 0.00 |
| ATOM | 1417 | CG   | ASP | 91 | 4.401  | -2.982 | -15.666 | 1.00 | 0.00 |
| ATOM | 1418 | OD1  | ASP | 91 | 5.531  | -3.261 | -16.033 | 1.00 | 0.00 |
| ATOM | 1419 | OD2  | ASP | 91 | 3.506  | -3.801 | -15.534 | 1.00 | 0.00 |

|      |      |      |     |    |       |       |         |      |      |
|------|------|------|-----|----|-------|-------|---------|------|------|
| ATOM | 1420 | C    | ASP | 91 | 5.077 | 0.758 | -15.070 | 1.00 | 0.00 |
| ATOM | 1421 | O    | ASP | 91 | 4.807 | 1.212 | -13.975 | 1.00 | 0.00 |
| ATOM | 1422 | N    | ARG | 92 | 5.110 | 1.521 | -16.129 | 1.00 | 0.00 |
| ATOM | 1423 | H    | ARG | 92 | 5.336 | 1.152 | -17.042 | 1.00 | 0.00 |
| ATOM | 1424 | CA   | ARG | 92 | 4.811 | 2.976 | -16.009 | 1.00 | 0.00 |
| ATOM | 1425 | HA   | ARG | 92 | 5.387 | 3.413 | -15.193 | 1.00 | 0.00 |
| ATOM | 1426 | CB   | ARG | 92 | 5.190 | 3.685 | -17.310 | 1.00 | 0.00 |
| ATOM | 1427 | HB2  | ARG | 92 | 6.266 | 3.606 | -17.466 | 1.00 | 0.00 |
| ATOM | 1428 | HB3  | ARG | 92 | 4.668 | 3.216 | -18.144 | 1.00 | 0.00 |
| ATOM | 1429 | CG   | ARG | 92 | 4.794 | 5.159 | -17.224 | 1.00 | 0.00 |
| ATOM | 1430 | HG2  | ARG | 92 | 3.751 | 5.237 | -16.918 | 1.00 | 0.00 |
| ATOM | 1431 | HG3  | ARG | 92 | 5.426 | 5.663 | -16.493 | 1.00 | 0.00 |
| ATOM | 1432 | CD   | ARG | 92 | 4.974 | 5.817 | -18.593 | 1.00 | 0.00 |
| ATOM | 1433 | HD2  | ARG | 92 | 4.262 | 5.403 | -19.307 | 1.00 | 0.00 |
| ATOM | 1434 | HD3  | ARG | 92 | 4.826 | 6.894 | -18.516 | 1.00 | 0.00 |
| ATOM | 1435 | NE   | ARG | 92 | 6.354 | 5.559 | -19.091 | 1.00 | 0.00 |
| ATOM | 1436 | HE   | ARG | 92 | 6.952 | 4.870 | -18.656 | 1.00 | 0.00 |
| ATOM | 1437 | CZ   | ARG | 92 | 6.815 | 6.227 | -20.112 | 1.00 | 0.00 |
| ATOM | 1438 | NH1  | ARG | 92 | 6.550 | 7.499 | -20.232 | 1.00 | 0.00 |
| ATOM | 1439 | HH11 | ARG | 92 | 5.988 | 7.962 | -19.533 | 1.00 | 0.00 |



|      |      |      |     |    |        |        |         |      |      |
|------|------|------|-----|----|--------|--------|---------|------|------|
| ATOM | 1440 | HH12 | ARG | 92 | 6.909  | 8.013  | -21.024 | 1.00 | 0.00 |
| ATOM | 1441 | NH2  | ARG | 92 | 7.543  | 5.624  | -21.012 | 1.00 | 0.00 |
| ATOM | 1442 | HH21 | ARG | 92 | 7.748  | 4.639  | -20.915 | 1.00 | 0.00 |
| ATOM | 1443 | HH22 | ARG | 92 | 7.899  | 6.144  | -21.801 | 1.00 | 0.00 |
| ATOM | 1444 | C    | ARG | 92 | 3.317  | 3.169  | -15.740 | 1.00 | 0.00 |
| ATOM | 1445 | O    | ARG | 92 | 2.884  | 4.219  | -15.307 | 1.00 | 0.00 |
| ATOM | 1446 | N    | GLN | 93 | 2.524  | 2.165  | -15.994 | 1.00 | 0.00 |
| ATOM | 1447 | H    | GLN | 93 | 2.876  | 1.289  | -16.355 | 1.00 | 0.00 |
| ATOM | 1448 | CA   | GLN | 93 | 1.060  | 2.292  | -15.754 | 1.00 | 0.00 |
| ATOM | 1449 | HA   | GLN | 93 | 0.703  | 3.263  | -16.094 | 1.00 | 0.00 |
| ATOM | 1450 | CB   | GLN | 93 | 0.321  | 1.199  | -16.532 | 1.00 | 0.00 |
| ATOM | 1451 | HB2  | GLN | 93 | 0.681  | 1.178  | -17.561 | 1.00 | 0.00 |
| ATOM | 1452 | HB3  | GLN | 93 | 0.505  | 0.231  | -16.064 | 1.00 | 0.00 |
| ATOM | 1453 | CG   | GLN | 93 | -1.181 | 1.493  | -16.523 | 1.00 | 0.00 |
| ATOM | 1454 | HG2  | GLN | 93 | -1.579 | 1.403  | -15.512 | 1.00 | 0.00 |
| ATOM | 1455 | HG3  | GLN | 93 | -1.371 | 2.497  | -16.900 | 1.00 | 0.00 |
| ATOM | 1456 | CD   | GLN | 93 | -1.902 | 0.488  | -17.424 | 1.00 | 0.00 |
| ATOM | 1457 | OE1  | GLN | 93 | -1.273 | -0.250 | -18.156 | 1.00 | 0.00 |
| ATOM | 1458 | NE2  | GLN | 93 | -3.205 | 0.427  | -17.400 | 1.00 | 0.00 |
| ATOM | 1459 | HE21 | GLN | 93 | -3.687 | -0.234 | -17.992 | 1.00 | 0.00 |

|      |      |      |     |    |        |        |         |      |      |
|------|------|------|-----|----|--------|--------|---------|------|------|
| ATOM | 1460 | HE22 | GLN | 93 | -3.725 | 1.041  | -16.790 | 1.00 | 0.00 |
| ATOM | 1461 | C    | GLN | 93 | 0.769  | 2.140  | -14.259 | 1.00 | 0.00 |
| ATOM | 1462 | O    | GLN | 93 | 0.093  | 2.956  | -13.664 | 1.00 | 0.00 |
| ATOM | 1463 | N    | MET | 94 | 1.273  | 1.103  | -13.648 | 1.00 | 0.00 |
| ATOM | 1464 | H    | MET | 94 | 1.838  | 0.422  | -14.136 | 1.00 | 0.00 |
| ATOM | 1465 | CA   | MET | 94 | 1.023  | 0.900  | -12.193 | 1.00 | 0.00 |
| ATOM | 1466 | HA   | MET | 94 | -0.042 | 0.756  | -12.009 | 1.00 | 0.00 |
| ATOM | 1467 | CB   | MET | 94 | 1.773  | -0.343 | -11.713 | 1.00 | 0.00 |
| ATOM | 1468 | HB2  | MET | 94 | 2.802  | -0.308 | -12.073 | 1.00 | 0.00 |
| ATOM | 1469 | HB3  | MET | 94 | 1.771  | -0.370 | -10.623 | 1.00 | 0.00 |
| ATOM | 1470 | CG   | MET | 94 | 1.087  | -1.598 | -12.255 | 1.00 | 0.00 |
| ATOM | 1471 | HG2  | MET | 94 | 0.767  | -1.428 | -13.283 | 1.00 | 0.00 |
| ATOM | 1472 | HG3  | MET | 94 | 1.781  | -2.439 | -12.226 | 1.00 | 0.00 |
| ATOM | 1473 | SD   | MET | 94 | -0.359 | -1.984 | -11.237 | 1.00 | 0.00 |
| ATOM | 1474 | CE   | MET | 94 | 0.490  | -2.043 | -9.639  | 1.00 | 0.00 |
| ATOM | 1475 | HE1  | MET | 94 | 0.954  | -1.078 | -9.437  | 1.00 | 0.00 |
| ATOM | 1476 | HE2  | MET | 94 | -0.229 | -2.272 | -8.853  | 1.00 | 0.00 |
| ATOM | 1477 | HE3  | MET | 94 | 1.258  | -2.816 | -9.663  | 1.00 | 0.00 |
| ATOM | 1478 | C    | MET | 94 | 1.516  | 2.121  | -11.412 | 1.00 | 0.00 |
| ATOM | 1479 | O    | MET | 94 | 0.886  | 2.565  | -10.474 | 1.00 | 0.00 |

|      |      |      |     |    |       |       |         |      |      |
|------|------|------|-----|----|-------|-------|---------|------|------|
| ATOM | 1480 | N    | VAL | 95 | 2.644 | 2.661 | -11.788 | 1.00 | 0.00 |
| ATOM | 1481 | H    | VAL | 95 | 3.175 | 2.292 | -12.564 | 1.00 | 0.00 |
| ATOM | 1482 | CA   | VAL | 95 | 3.183 | 3.849 | -11.064 | 1.00 | 0.00 |
| ATOM | 1483 | HA   | VAL | 95 | 3.680 | 3.537 | -10.145 | 1.00 | 0.00 |
| ATOM | 1484 | CB   | VAL | 95 | 4.201 | 4.568 | -11.951 | 1.00 | 0.00 |
| ATOM | 1485 | HB   | VAL | 95 | 3.746 | 4.799 | -12.914 | 1.00 | 0.00 |
| ATOM | 1486 | CG1  | VAL | 95 | 4.643 | 5.865 | -11.272 | 1.00 | 0.00 |
| ATOM | 1487 | HG11 | VAL | 95 | 5.099 | 5.634 | -10.309 | 1.00 | 0.00 |
| ATOM | 1488 | HG12 | VAL | 95 | 5.369 | 6.377 | -11.904 | 1.00 | 0.00 |
| ATOM | 1489 | HG13 | VAL | 95 | 3.777 | 6.508 | -11.118 | 1.00 | 0.00 |
| ATOM | 1490 | CG2  | VAL | 95 | 5.418 | 3.665 | -12.165 | 1.00 | 0.00 |
| ATOM | 1491 | HG21 | VAL | 95 | 5.104 | 2.739 | -12.649 | 1.00 | 0.00 |
| ATOM | 1492 | HG22 | VAL | 95 | 6.144 | 4.176 | -12.797 | 1.00 | 0.00 |
| ATOM | 1493 | HG23 | VAL | 95 | 5.874 | 3.434 | -11.202 | 1.00 | 0.00 |
| ATOM | 1494 | C    | VAL | 95 | 2.041 | 4.808 | -10.717 | 1.00 | 0.00 |
| ATOM | 1495 | O    | VAL | 95 | 1.414 | 4.691 | -9.683  | 1.00 | 0.00 |
| ATOM | 1496 | N    | GLN | 96 | 1.769 | 5.756 | -11.570 | 1.00 | 0.00 |
| ATOM | 1497 | H    | GLN | 96 | 2.288 | 5.862 | -12.430 | 1.00 | 0.00 |
| ATOM | 1498 | CA   | GLN | 96 | 0.670 | 6.721 | -11.284 | 1.00 | 0.00 |
| ATOM | 1499 | HA   | GLN | 96 | 0.909 | 7.315 | -10.402 | 1.00 | 0.00 |

|      |      |      |     |    |        |        |         |      |      |
|------|------|------|-----|----|--------|--------|---------|------|------|
| ATOM | 1500 | CB   | GLN | 96 | 0.495  | 7.664  | -12.477 | 1.00 | 0.00 |
| ATOM | 1501 | HB2  | GLN | 96 | 0.211  | 7.087  | -13.357 | 1.00 | 0.00 |
| ATOM | 1502 | HB3  | GLN | 96 | -0.284 | 8.392  | -12.253 | 1.00 | 0.00 |
| ATOM | 1503 | CG   | GLN | 96 | 1.812  | 8.393  | -12.749 | 1.00 | 0.00 |
| ATOM | 1504 | HG2  | GLN | 96 | 2.149  | 8.917  | -11.854 | 1.00 | 0.00 |
| ATOM | 1505 | HG3  | GLN | 96 | 2.578  | 7.683  | -13.063 | 1.00 | 0.00 |
| ATOM | 1506 | CD   | GLN | 96 | 1.606  | 9.417  | -13.867 | 1.00 | 0.00 |
| ATOM | 1507 | OE1  | GLN | 96 | 0.886  | 10.382 | -13.699 | 1.00 | 0.00 |
| ATOM | 1508 | NE2  | GLN | 96 | 2.214  | 9.249  | -15.010 | 1.00 | 0.00 |
| ATOM | 1509 | HE21 | GLN | 96 | 2.083  | 9.921  | -15.752 | 1.00 | 0.00 |
| ATOM | 1510 | HE22 | GLN | 96 | 2.813  | 8.447  | -15.147 | 1.00 | 0.00 |
| ATOM | 1511 | C    | GLN | 96 | -0.631 | 5.959  | -11.040 | 1.00 | 0.00 |
| ATOM | 1512 | O    | GLN | 96 | -1.271 | 6.110  | -10.018 | 1.00 | 0.00 |
| ATOM | 1513 | N    | GLN | 97 | -1.027 | 5.142  | -11.972 | 1.00 | 0.00 |
| ATOM | 1514 | H    | GLN | 97 | -0.500 | 5.017  | -12.824 | 1.00 | 0.00 |
| ATOM | 1515 | CA   | GLN | 97 | -2.287 | 4.366  | -11.801 | 1.00 | 0.00 |
| ATOM | 1516 | HA   | GLN | 97 | -3.152 | 5.011  | -11.951 | 1.00 | 0.00 |
| ATOM | 1517 | CB   | GLN | 97 | -2.333 | 3.238  | -12.834 | 1.00 | 0.00 |
| ATOM | 1518 | HB2  | GLN | 97 | -2.007 | 3.617  | -13.803 | 1.00 | 0.00 |
| ATOM | 1519 | HB3  | GLN | 97 | -1.672 | 2.429  | -12.521 | 1.00 | 0.00 |

|      |      |      |     |    |        |       |         |      |      |
|------|------|------|-----|----|--------|-------|---------|------|------|
| ATOM | 1520 | CG   | GLN | 97 | -3.765 | 2.711 | -12.948 | 1.00 | 0.00 |
| ATOM | 1521 | HG2  | GLN | 97 | -3.801 | 1.852 | -13.619 | 1.00 | 0.00 |
| ATOM | 1522 | HG3  | GLN | 97 | -4.139 | 2.420 | -11.966 | 1.00 | 0.00 |
| ATOM | 1523 | CD   | GLN | 97 | -4.669 | 3.809 | -13.510 | 1.00 | 0.00 |
| ATOM | 1524 | OE1  | GLN | 97 | -4.547 | 4.185 | -14.659 | 1.00 | 0.00 |
| ATOM | 1525 | NE2  | GLN | 97 | -5.580 | 4.342 | -12.742 | 1.00 | 0.00 |
| ATOM | 1526 | HE21 | GLN | 97 | -6.181 | 5.067 | -13.106 | 1.00 | 0.00 |
| ATOM | 1527 | HE22 | GLN | 97 | -5.679 | 4.026 | -11.788 | 1.00 | 0.00 |
| ATOM | 1528 | C    | GLN | 97 | -2.338 | 3.774 | -10.391 | 1.00 | 0.00 |
| ATOM | 1529 | O    | GLN | 97 | -3.136 | 4.176 | -9.567  | 1.00 | 0.00 |
| ATOM | 1530 | N    | PHE | 98 | -1.491 | 2.823 | -10.105 | 1.00 | 0.00 |
| ATOM | 1531 | H    | PHE | 98 | -0.824 | 2.477 | -10.780 | 1.00 | 0.00 |
| ATOM | 1532 | CA   | PHE | 98 | -1.499 | 2.214 | -8.744  | 1.00 | 0.00 |
| ATOM | 1533 | HA   | PHE | 98 | -2.421 | 1.653 | -8.592  | 1.00 | 0.00 |
| ATOM | 1534 | CB   | PHE | 98 | -0.313 | 1.257 | -8.588  | 1.00 | 0.00 |
| ATOM | 1535 | HB2  | PHE | 98 | -0.266 | 0.527 | -9.397  | 1.00 | 0.00 |
| ATOM | 1536 | HB3  | PHE | 98 | 0.638  | 1.786 | -8.522  | 1.00 | 0.00 |
| ATOM | 1537 | CG   | PHE | 98 | -0.461 | 0.470 | -7.303  | 1.00 | 0.00 |
| ATOM | 1538 | CD1  | PHE | 98 | -1.661 | 0.518 | -6.578  | 1.00 | 0.00 |
| ATOM | 1539 | HD1  | PHE | 98 | -2.491 | 1.123 | -6.941  | 1.00 | 0.00 |

|      |      |         |    |        |        |        |      |      |
|------|------|---------|----|--------|--------|--------|------|------|
| ATOM | 1540 | CE1 PHE | 98 | -1.792 | -0.210 | -5.391 | 1.00 | 0.00 |
| ATOM | 1541 | HE1 PHE | 98 | -2.726 | -0.172 | -4.830 | 1.00 | 0.00 |
| ATOM | 1542 | CZ PHE  | 98 | -0.727 | -0.987 | -4.923 | 1.00 | 0.00 |
| ATOM | 1543 | HZ PHE  | 98 | -0.830 | -1.554 | -3.997 | 1.00 | 0.00 |
| ATOM | 1544 | CE2 PHE | 98 | 0.472  | -1.037 | -5.644 | 1.00 | 0.00 |
| ATOM | 1545 | HE2 PHE | 98 | 1.302  | -1.643 | -5.280 | 1.00 | 0.00 |
| ATOM | 1546 | CD2 PHE | 98 | 0.605  | -0.309 | -6.833 | 1.00 | 0.00 |
| ATOM | 1547 | HD2 PHE | 98 | 1.539  | -0.348 | -7.394 | 1.00 | 0.00 |
| ATOM | 1548 | C PHE   | 98 | -1.400 | 3.323  | -7.698 | 1.00 | 0.00 |
| ATOM | 1549 | O PHE   | 98 | -2.030 | 3.271  | -6.661 | 1.00 | 0.00 |
| ATOM | 1550 | N LYS   | 99 | -0.615 | 4.329  | -7.966 | 1.00 | 0.00 |
| ATOM | 1551 | H LYS   | 99 | -0.089 | 4.377  | -8.827 | 1.00 | 0.00 |
| ATOM | 1552 | CA LYS  | 99 | -0.478 | 5.446  | -6.991 | 1.00 | 0.00 |
| ATOM | 1553 | HA LYS  | 99 | -0.184 | 5.060  | -6.015 | 1.00 | 0.00 |
| ATOM | 1554 | CB LYS  | 99 | 0.597  | 6.420  | -7.475 | 1.00 | 0.00 |
| ATOM | 1555 | HB2 LYS | 99 | 1.510  | 5.870  | -7.703 | 1.00 | 0.00 |
| ATOM | 1556 | HB3 LYS | 99 | 0.248  | 6.930  | -8.373 | 1.00 | 0.00 |
| ATOM | 1557 | CG LYS  | 99 | 0.882  | 7.451  | -6.380 | 1.00 | 0.00 |
| ATOM | 1558 | HG2 LYS | 99 | -0.045 | 7.952  | -6.101 | 1.00 | 0.00 |
| ATOM | 1559 | HG3 LYS | 99 | 1.301  | 6.949  | -5.507 | 1.00 | 0.00 |

|      |      |     |     |     |        |        |         |      |      |
|------|------|-----|-----|-----|--------|--------|---------|------|------|
| ATOM | 1560 | CD  | LYS | 99  | 1.882  | 8.484  | -6.903  | 1.00 | 0.00 |
| ATOM | 1561 | HD2 | LYS | 99  | 2.829  | 7.993  | -7.127  | 1.00 | 0.00 |
| ATOM | 1562 | HD3 | LYS | 99  | 1.489  | 8.944  | -7.809  | 1.00 | 0.00 |
| ATOM | 1563 | CE  | LYS | 99  | 2.105  | 9.561  | -5.839  | 1.00 | 0.00 |
| ATOM | 1564 | HE2 | LYS | 99  | 1.925  | 10.544 | -6.273  | 1.00 | 0.00 |
| ATOM | 1565 | HE3 | LYS | 99  | 1.418  | 9.399  | -5.008  | 1.00 | 0.00 |
| ATOM | 1566 | NZ  | LYS | 99  | 3.508  | 9.487  | -5.344  | 1.00 | 0.00 |
| ATOM | 1567 | HZ1 | LYS | 99  | 4.145  | 9.637  | -6.114  | 1.00 | 0.00 |
| ATOM | 1568 | HZ2 | LYS | 99  | 3.655  | 10.197 | -4.642  | 1.00 | 0.00 |
| ATOM | 1569 | HZ3 | LYS | 99  | 3.676  | 8.576  | -4.941  | 1.00 | 0.00 |
| ATOM | 1570 | C   | LYS | 99  | -1.816 | 6.178  | -6.876  | 1.00 | 0.00 |
| ATOM | 1571 | O   | LYS | 99  | -2.180 | 6.668  | -5.826  | 1.00 | 0.00 |
| ATOM | 1572 | N   | ARG | 100 | -2.553 | 6.249  | -7.949  | 1.00 | 0.00 |
| ATOM | 1573 | H   | ARG | 100 | -2.255 | 5.843  | -8.825  | 1.00 | 0.00 |
| ATOM | 1574 | CA  | ARG | 100 | -3.871 | 6.941  | -7.903  | 1.00 | 0.00 |
| ATOM | 1575 | HA  | ARG | 100 | -3.759 | 7.937  | -7.475  | 1.00 | 0.00 |
| ATOM | 1576 | CB  | ARG | 100 | -4.429 | 7.078  | -9.321  | 1.00 | 0.00 |
| ATOM | 1577 | HB2 | ARG | 100 | -4.247 | 6.157  | -9.875  | 1.00 | 0.00 |
| ATOM | 1578 | HB3 | ARG | 100 | -5.501 | 7.267  | -9.274  | 1.00 | 0.00 |
| ATOM | 1579 | CG  | ARG | 100 | -3.736 | 8.244  | -10.029 | 1.00 | 0.00 |

|      |      |      |     |     |        |        |         |      |      |
|------|------|------|-----|-----|--------|--------|---------|------|------|
| ATOM | 1580 | HG2  | ARG | 100 | -3.883 | 9.157  | -9.453  | 1.00 | 0.00 |
| ATOM | 1581 | HG3  | ARG | 100 | -2.669 | 8.035  | -10.113 | 1.00 | 0.00 |
| ATOM | 1582 | CD   | ARG | 100 | -4.333 | 8.421  | -11.427 | 1.00 | 0.00 |
| ATOM | 1583 | HD2  | ARG | 100 | -4.426 | 7.454  | -11.923 | 1.00 | 0.00 |
| ATOM | 1584 | HD3  | ARG | 100 | -5.314 | 8.891  | -11.362 | 1.00 | 0.00 |
| ATOM | 1585 | NE   | ARG | 100 | -3.439 | 9.292  | -12.242 | 1.00 | 0.00 |
| ATOM | 1586 | HE   | ARG | 100 | -2.533 | 8.973  | -12.555 | 1.00 | 0.00 |
| ATOM | 1587 | CZ   | ARG | 100 | -3.821 | 10.496 | -12.567 | 1.00 | 0.00 |
| ATOM | 1588 | NH1  | ARG | 100 | -3.195 | 11.533 | -12.081 | 1.00 | 0.00 |
| ATOM | 1589 | HH11 | ARG | 100 | -2.415 | 11.399 | -11.453 | 1.00 | 0.00 |
| ATOM | 1590 | HH12 | ARG | 100 | -3.493 | 12.463 | -12.335 | 1.00 | 0.00 |
| ATOM | 1591 | NH2  | ARG | 100 | -4.829 | 10.664 | -13.378 | 1.00 | 0.00 |
| ATOM | 1592 | HH21 | ARG | 100 | -5.311 | 9.859  | -13.753 | 1.00 | 0.00 |
| ATOM | 1593 | HH22 | ARG | 100 | -5.122 | 11.597 | -13.628 | 1.00 | 0.00 |
| ATOM | 1594 | C    | ARG | 100 | -4.835 | 6.119  | -7.049  | 1.00 | 0.00 |
| ATOM | 1595 | O    | ARG | 100 | -5.436 | 6.618  | -6.118  | 1.00 | 0.00 |
| ATOM | 1596 | N    | GLU | 101 | -4.979 | 4.856  | -7.348  | 1.00 | 0.00 |
| ATOM | 1597 | H    | GLU | 101 | -4.480 | 4.430  | -8.116  | 1.00 | 0.00 |
| ATOM | 1598 | CA   | GLU | 101 | -5.894 | 4.002  | -6.542  | 1.00 | 0.00 |
| ATOM | 1599 | HA   | GLU | 101 | -6.908 | 4.398  | -6.577  | 1.00 | 0.00 |



|      |      |     |     |     |        |       |        |      |      |
|------|------|-----|-----|-----|--------|-------|--------|------|------|
| ATOM | 1600 | CB  | GLU | 101 | -5.904 | 2.582 | -7.111 | 1.00 | 0.00 |
| ATOM | 1601 | HB2 | GLU | 101 | -4.883 | 2.202 | -7.158 | 1.00 | 0.00 |
| ATOM | 1602 | HB3 | GLU | 101 | -6.501 | 1.937 | -6.467 | 1.00 | 0.00 |
| ATOM | 1603 | CG  | GLU | 101 | -6.507 | 2.597 | -8.517 | 1.00 | 0.00 |
| ATOM | 1604 | HG2 | GLU | 101 | -5.836 | 3.125 | -9.194 | 1.00 | 0.00 |
| ATOM | 1605 | HG3 | GLU | 101 | -6.643 | 1.573 | -8.867 | 1.00 | 0.00 |
| ATOM | 1606 | CD  | GLU | 101 | -7.861 | 3.309 | -8.483 | 1.00 | 0.00 |
| ATOM | 1607 | OE1 | GLU | 101 | -8.571 | 3.145 | -7.505 | 1.00 | 0.00 |
| ATOM | 1608 | OE2 | GLU | 101 | -8.166 | 4.006 | -9.438 | 1.00 | 0.00 |
| ATOM | 1609 | C   | GLU | 101 | -5.392 | 3.971 | -5.100 | 1.00 | 0.00 |
| ATOM | 1610 | O   | GLU | 101 | -6.161 | 3.987 | -4.159 | 1.00 | 0.00 |
| ATOM | 1611 | N   | LEU | 102 | -4.099 | 3.928 | -4.921 | 1.00 | 0.00 |
| ATOM | 1612 | H   | LEU | 102 | -3.457 | 3.912 | -5.701 | 1.00 | 0.00 |
| ATOM | 1613 | CA  | LEU | 102 | -3.536 | 3.899 | -3.544 | 1.00 | 0.00 |
| ATOM | 1614 | HA  | LEU | 102 | -3.839 | 2.987 | -3.030 | 1.00 | 0.00 |
| ATOM | 1615 | CB  | LEU | 102 | -2.008 | 3.933 | -3.619 | 1.00 | 0.00 |
| ATOM | 1616 | HB2 | LEU | 102 | -1.695 | 3.875 | -4.662 | 1.00 | 0.00 |
| ATOM | 1617 | HB3 | LEU | 102 | -1.645 | 4.863 | -3.183 | 1.00 | 0.00 |
| ATOM | 1618 | CG  | LEU | 102 | -1.426 | 2.746 | -2.845 | 1.00 | 0.00 |
| ATOM | 1619 | HG  | LEU | 102 | -1.509 | 2.935 | -1.775 | 1.00 | 0.00 |

|      |      |          |     |        |       |        |      |      |
|------|------|----------|-----|--------|-------|--------|------|------|
| ATOM | 1620 | CD1 LEU  | 102 | -2.197 | 1.472 | -3.199 | 1.00 | 0.00 |
| ATOM | 1621 | HD11 LEU | 102 | -2.113 | 1.281 | -4.269 | 1.00 | 0.00 |
| ATOM | 1622 | HD12 LEU | 102 | -1.780 | 0.629 | -2.647 | 1.00 | 0.00 |
| ATOM | 1623 | HD13 LEU | 102 | -3.247 | 1.596 | -2.934 | 1.00 | 0.00 |
| ATOM | 1624 | CD2 LEU  | 102 | 0.047  | 2.569 | -3.219 | 1.00 | 0.00 |
| ATOM | 1625 | HD21 LEU | 102 | 0.598  | 3.474 | -2.965 | 1.00 | 0.00 |
| ATOM | 1626 | HD22 LEU | 102 | 0.463  | 1.724 | -2.669 | 1.00 | 0.00 |
| ATOM | 1627 | HD23 LEU | 102 | 0.131  | 2.381 | -4.290 | 1.00 | 0.00 |
| ATOM | 1628 | C LEU    | 102 | -4.037 | 5.114 | -2.762 | 1.00 | 0.00 |
| ATOM | 1629 | O LEU    | 102 | -4.326 | 5.030 | -1.587 | 1.00 | 0.00 |
| ATOM | 1630 | N MET    | 103 | -4.149 | 6.244 | -3.407 | 1.00 | 0.00 |
| ATOM | 1631 | H MET    | 103 | -3.915 | 6.325 | -4.386 | 1.00 | 0.00 |
| ATOM | 1632 | CA MET   | 103 | -4.638 | 7.457 | -2.694 | 1.00 | 0.00 |
| ATOM | 1633 | HA MET   | 103 | -4.005 | 7.669 | -1.832 | 1.00 | 0.00 |
| ATOM | 1634 | CB MET   | 103 | -4.596 | 8.659 | -3.639 | 1.00 | 0.00 |
| ATOM | 1635 | HB2 MET  | 103 | -5.048 | 8.388 | -4.593 | 1.00 | 0.00 |
| ATOM | 1636 | HB3 MET  | 103 | -5.148 | 9.488 | -3.198 | 1.00 | 0.00 |
| ATOM | 1637 | CG MET   | 103 | -3.141 | 9.078 | -3.865 | 1.00 | 0.00 |
| ATOM | 1638 | HG2 MET  | 103 | -2.662 | 9.279 | -2.907 | 1.00 | 0.00 |
| ATOM | 1639 | HG3 MET  | 103 | -2.603 | 8.281 | -4.379 | 1.00 | 0.00 |

|      |      |     |     |     |         |        |        |      |      |
|------|------|-----|-----|-----|---------|--------|--------|------|------|
| ATOM | 1640 | SD  | MET | 103 | -3.096  | 10.577 | -4.879 | 1.00 | 0.00 |
| ATOM | 1641 | CE  | MET | 103 | -3.355  | 11.765 | -3.540 | 1.00 | 0.00 |
| ATOM | 1642 | HE1 | MET | 103 | -2.549  | 11.673 | -2.811 | 1.00 | 0.00 |
| ATOM | 1643 | HE2 | MET | 103 | -3.362  | 12.776 | -3.947 | 1.00 | 0.00 |
| ATOM | 1644 | HE3 | MET | 103 | -4.309  | 11.562 | -3.053 | 1.00 | 0.00 |
| ATOM | 1645 | C   | MET | 103 | -6.077  | 7.219  | -2.234 | 1.00 | 0.00 |
| ATOM | 1646 | O   | MET | 103 | -6.506  | 7.722  | -1.215 | 1.00 | 0.00 |
| ATOM | 1647 | N   | SER | 104 | -6.824  | 6.449  | -2.978 | 1.00 | 0.00 |
| ATOM | 1648 | H   | SER | 104 | -6.471  | 6.027  | -3.825 | 1.00 | 0.00 |
| ATOM | 1649 | CA  | SER | 104 | -8.233  | 6.172  | -2.586 | 1.00 | 0.00 |
| ATOM | 1650 | HA  | SER | 104 | -8.697  | 7.071  | -2.183 | 1.00 | 0.00 |
| ATOM | 1651 | CB  | SER | 104 | -9.025  | 5.722  | -3.815 | 1.00 | 0.00 |
| ATOM | 1652 | HB2 | SER | 104 | -10.066 | 5.559  | -3.538 | 1.00 | 0.00 |
| ATOM | 1653 | HB3 | SER | 104 | -8.970  | 6.491  | -4.585 | 1.00 | 0.00 |
| ATOM | 1654 | OG  | SER | 104 | -8.474  | 4.512  | -4.315 | 1.00 | 0.00 |
| ATOM | 1655 | HG  | SER | 104 | -8.970  | 4.229  | -5.086 | 1.00 | 0.00 |
| ATOM | 1656 | C   | SER | 104 | -8.257  | 5.065  | -1.530 | 1.00 | 0.00 |
| ATOM | 1657 | O   | SER | 104 | -9.115  | 5.031  | -0.671 | 1.00 | 0.00 |
| ATOM | 1658 | N   | LEU | 105 | -7.323  | 4.155  | -1.591 | 1.00 | 0.00 |
| ATOM | 1659 | H   | LEU | 105 | -6.612  | 4.175  | -2.308 | 1.00 | 0.00 |

|      |      |      |     |     |        |        |        |      |      |
|------|------|------|-----|-----|--------|--------|--------|------|------|
| ATOM | 1660 | CA   | LEU | 105 | -7.291 | 3.047  | -0.596 | 1.00 | 0.00 |
| ATOM | 1661 | HA   | LEU | 105 | -8.039 | 2.294  | -0.845 | 1.00 | 0.00 |
| ATOM | 1662 | CB   | LEU | 105 | -5.910 | 2.386  | -0.608 | 1.00 | 0.00 |
| ATOM | 1663 | HB2  | LEU | 105 | -5.248 | 2.950  | -1.265 | 1.00 | 0.00 |
| ATOM | 1664 | HB3  | LEU | 105 | -5.500 | 2.380  | 0.402  | 1.00 | 0.00 |
| ATOM | 1665 | CG   | LEU | 105 | -6.030 | 0.947  | -1.118 | 1.00 | 0.00 |
| ATOM | 1666 | HG   | LEU | 105 | -5.092 | 0.420  | -0.941 | 1.00 | 0.00 |
| ATOM | 1667 | CD1  | LEU | 105 | -7.164 | 0.231  | -0.380 | 1.00 | 0.00 |
| ATOM | 1668 | HD11 | LEU | 105 | -8.102 | 0.756  | -0.558 | 1.00 | 0.00 |
| ATOM | 1669 | HD12 | LEU | 105 | -7.246 | -0.793 | -0.745 | 1.00 | 0.00 |
| ATOM | 1670 | HD13 | LEU | 105 | -6.951 | 0.218  | 0.689  | 1.00 | 0.00 |
| ATOM | 1671 | CD2  | LEU | 105 | -6.326 | 0.961  | -2.618 | 1.00 | 0.00 |
| ATOM | 1672 | HD21 | LEU | 105 | -5.516 | 1.466  | -3.144 | 1.00 | 0.00 |
| ATOM | 1673 | HD22 | LEU | 105 | -6.411 | -0.063 | -2.982 | 1.00 | 0.00 |
| ATOM | 1674 | HD23 | LEU | 105 | -7.262 | 1.489  | -2.799 | 1.00 | 0.00 |
| ATOM | 1675 | C    | LEU | 105 | -7.583 | 3.592  | 0.804  | 1.00 | 0.00 |
| ATOM | 1676 | O    | LEU | 105 | -8.426 | 3.077  | 1.511  | 1.00 | 0.00 |
| ATOM | 1677 | N    | PRO | 106 | -6.875 | 4.658  | 1.215  | 1.00 | 0.00 |
| ATOM | 1678 | CD   | PRO | 106 | -5.839 | 5.356  | 0.433  | 1.00 | 0.00 |
| ATOM | 1679 | HD2  | PRO | 106 | -6.189 | 5.509  | -0.588 | 1.00 | 0.00 |

|      |      |         |     |         |       |        |      |      |
|------|------|---------|-----|---------|-------|--------|------|------|
| ATOM | 1680 | HD3 PRO | 106 | -4.926  | 4.760 | 0.417  | 1.00 | 0.00 |
| ATOM | 1681 | CG PRO  | 106 | -5.668  | 6.646 | 1.185  | 1.00 | 0.00 |
| ATOM | 1682 | HG2 PRO | 106 | -6.355  | 7.394 | 0.789  | 1.00 | 0.00 |
| ATOM | 1683 | HG3 PRO | 106 | -4.643  | 7.000 | 1.075  | 1.00 | 0.00 |
| ATOM | 1684 | CB PRO  | 106 | -5.971  | 6.328 | 2.608  | 1.00 | 0.00 |
| ATOM | 1685 | HB2 PRO | 106 | -6.357  | 7.230 | 3.082  | 1.00 | 0.00 |
| ATOM | 1686 | HB3 PRO | 106 | -5.126  | 5.948 | 3.184  | 1.00 | 0.00 |
| ATOM | 1687 | CA PRO  | 106 | -7.070  | 5.268 | 2.534  | 1.00 | 0.00 |
| ATOM | 1688 | HA PRO  | 106 | -6.972  | 4.493 | 3.294  | 1.00 | 0.00 |
| ATOM | 1689 | C PRO   | 106 | -8.449  | 5.917 | 2.644  | 1.00 | 0.00 |
| ATOM | 1690 | O PRO   | 106 | -8.854  | 6.376 | 3.694  | 1.00 | 0.00 |
| ATOM | 1691 | N GLN   | 107 | -9.178  | 5.947 | 1.563  | 1.00 | 0.00 |
| ATOM | 1692 | H GLN   | 107 | -8.841  | 5.565 | 0.690  | 1.00 | 0.00 |
| ATOM | 1693 | CA GLN  | 107 | -10.536 | 6.551 | 1.591  | 1.00 | 0.00 |
| ATOM | 1694 | HA GLN  | 107 | -10.636 | 7.213 | 2.451  | 1.00 | 0.00 |
| ATOM | 1695 | CB GLN  | 107 | -10.762 | 7.367 | 0.317  | 1.00 | 0.00 |
| ATOM | 1696 | HB2 GLN | 107 | -9.979  | 8.119 | 0.223  | 1.00 | 0.00 |
| ATOM | 1697 | HB3 GLN | 107 | -10.734 | 6.705 | -0.549 | 1.00 | 0.00 |
| ATOM | 1698 | CG GLN  | 107 | -12.126 | 8.057 | 0.388  | 1.00 | 0.00 |
| ATOM | 1699 | HG2 GLN | 107 | -12.918 | 7.316 | 0.498  | 1.00 | 0.00 |

|      |      |      |     |     |         |        |        |      |      |
|------|------|------|-----|-----|---------|--------|--------|------|------|
| ATOM | 1700 | HG3  | GLN | 107 | -12.157 | 8.748  | 1.230  | 1.00 | 0.00 |
| ATOM | 1701 | CD   | GLN | 107 | -12.368 | 8.844  | -0.901 | 1.00 | 0.00 |
| ATOM | 1702 | OE1  | GLN | 107 | -11.481 | 8.976  | -1.722 | 1.00 | 0.00 |
| ATOM | 1703 | NE2  | GLN | 107 | -13.539 | 9.378  | -1.116 | 1.00 | 0.00 |
| ATOM | 1704 | HE21 | GLN | 107 | -13.705 | 9.898  | -1.965 | 1.00 | 0.00 |
| ATOM | 1705 | HE22 | GLN | 107 | -14.274 | 9.268  | -0.432 | 1.00 | 0.00 |
| ATOM | 1706 | C    | GLN | 107 | -11.576 | 5.436  | 1.677  | 1.00 | 0.00 |
| ATOM | 1707 | O    | GLN | 107 | -12.479 | 5.475  | 2.488  | 1.00 | 0.00 |
| ATOM | 1708 | N    | GLN | 108 | -11.458 | 4.441  | 0.841  | 1.00 | 0.00 |
| ATOM | 1709 | H    | GLN | 108 | -10.711 | 4.404  | 0.162  | 1.00 | 0.00 |
| ATOM | 1710 | CA   | GLN | 108 | -12.440 | 3.321  | 0.872  | 1.00 | 0.00 |
| ATOM | 1711 | HA   | GLN | 108 | -13.405 | 3.652  | 0.489  | 1.00 | 0.00 |
| ATOM | 1712 | CB   | GLN | 108 | -11.933 | 2.175  | -0.006 | 1.00 | 0.00 |
| ATOM | 1713 | HB2  | GLN | 108 | -11.733 | 2.547  | -1.011 | 1.00 | 0.00 |
| ATOM | 1714 | HB3  | GLN | 108 | -11.015 | 1.769  | 0.420  | 1.00 | 0.00 |
| ATOM | 1715 | CG   | GLN | 108 | -12.994 | 1.075  | -0.072 | 1.00 | 0.00 |
| ATOM | 1716 | HG2  | GLN | 108 | -13.274 | 0.756  | 0.932  | 1.00 | 0.00 |
| ATOM | 1717 | HG3  | GLN | 108 | -13.878 | 1.434  | -0.599 | 1.00 | 0.00 |
| ATOM | 1718 | CD   | GLN | 108 | -12.430 | -0.130 | -0.828 | 1.00 | 0.00 |
| ATOM | 1719 | OE1  | GLN | 108 | -11.521 | -0.785 | -0.360 | 1.00 | 0.00 |

|      |      |      |     |     |         |        |        |      |      |
|------|------|------|-----|-----|---------|--------|--------|------|------|
| ATOM | 1720 | NE2  | GLN | 108 | -12.937 | -0.453 | -1.987 | 1.00 | 0.00 |
| ATOM | 1721 | HE21 | GLN | 108 | -12.570 | -1.248 | -2.492 | 1.00 | 0.00 |
| ATOM | 1722 | HE22 | GLN | 108 | -13.694 | 0.092  | -2.373 | 1.00 | 0.00 |
| ATOM | 1723 | C    | GLN | 108 | -12.607 | 2.827  | 2.309  | 1.00 | 0.00 |
| ATOM | 1724 | O    | GLN | 108 | -13.651 | 2.336  | 2.691  | 1.00 | 0.00 |
| ATOM | 1725 | N    | CYX | 109 | -11.586 | 2.953  | 3.111  | 1.00 | 0.00 |
| ATOM | 1726 | H    | CYX | 109 | -10.714 | 3.358  | 2.801  | 1.00 | 0.00 |
| ATOM | 1727 | CA   | CYX | 109 | -11.686 | 2.490  | 4.524  | 1.00 | 0.00 |
| ATOM | 1728 | HA   | CYX | 109 | -12.729 | 2.326  | 4.794  | 1.00 | 0.00 |
| ATOM | 1729 | CB   | CYX | 109 | -10.925 | 1.170  | 4.690  | 1.00 | 0.00 |
| ATOM | 1730 | HB2  | CYX | 109 | -10.477 | 1.130  | 5.683  | 1.00 | 0.00 |
| ATOM | 1731 | HB3  | CYX | 109 | -11.614 | 0.334  | 4.569  | 1.00 | 0.00 |
| ATOM | 1732 | SG   | CYX | 109 | -9.583  | 1.077  | 3.476  | 1.00 | 0.00 |
| ATOM | 1733 | C    | CYX | 109 | -11.081 | 3.549  | 5.450  | 1.00 | 0.00 |
| ATOM | 1734 | O    | CYX | 109 | -10.611 | 3.246  | 6.529  | 1.00 | 0.00 |
| ATOM | 1735 | N    | ASN | 110 | -11.093 | 4.786  | 5.037  | 1.00 | 0.00 |
| ATOM | 1736 | H    | ASN | 110 | -11.483 | 5.041  | 4.141  | 1.00 | 0.00 |
| ATOM | 1737 | CA   | ASN | 110 | -10.522 | 5.865  | 5.892  | 1.00 | 0.00 |
| ATOM | 1738 | HA   | ASN | 110 | -10.334 | 6.759  | 5.297  | 1.00 | 0.00 |
| ATOM | 1739 | CB   | ASN | 110 | -11.515 | 6.216  | 7.002  | 1.00 | 0.00 |

|      |      |      |     |     |         |       |       |      |      |
|------|------|------|-----|-----|---------|-------|-------|------|------|
| ATOM | 1740 | HB2  | ASN | 110 | -11.611 | 5.383 | 7.699 | 1.00 | 0.00 |
| ATOM | 1741 | HB3  | ASN | 110 | -11.182 | 7.103 | 7.540 | 1.00 | 0.00 |
| ATOM | 1742 | CG   | ASN | 110 | -12.887 | 6.502 | 6.389 | 1.00 | 0.00 |
| ATOM | 1743 | OD1  | ASN | 110 | -12.993 | 7.227 | 5.420 | 1.00 | 0.00 |
| ATOM | 1744 | ND2  | ASN | 110 | -13.950 | 5.959 | 6.917 | 1.00 | 0.00 |
| ATOM | 1745 | HD21 | ASN | 110 | -14.859 | 6.143 | 6.517 | 1.00 | 0.00 |
| ATOM | 1746 | HD22 | ASN | 110 | -13.858 | 5.356 | 7.723 | 1.00 | 0.00 |
| ATOM | 1747 | C    | ASN | 110 | -9.211  | 5.385 | 6.516 | 1.00 | 0.00 |
| ATOM | 1748 | O    | ASN | 110 | -8.971  | 5.563 | 7.694 | 1.00 | 0.00 |
| ATOM | 1749 | N    | PHE | 111 | -8.358  | 4.776 | 5.736 | 1.00 | 0.00 |
| ATOM | 1750 | H    | PHE | 111 | -8.548  | 4.619 | 4.756 | 1.00 | 0.00 |
| ATOM | 1751 | CA   | PHE | 111 | -7.064  | 4.289 | 6.290 | 1.00 | 0.00 |
| ATOM | 1752 | HA   | PHE | 111 | -7.234  | 3.722 | 7.205 | 1.00 | 0.00 |
| ATOM | 1753 | CB   | PHE | 111 | -6.383  | 3.376 | 5.269 | 1.00 | 0.00 |
| ATOM | 1754 | HB2  | PHE | 111 | -7.094  | 2.939 | 4.568 | 1.00 | 0.00 |
| ATOM | 1755 | HB3  | PHE | 111 | -5.598  | 3.891 | 4.716 | 1.00 | 0.00 |
| ATOM | 1756 | CG   | PHE | 111 | -5.721  | 2.224 | 5.987 | 1.00 | 0.00 |
| ATOM | 1757 | CD1  | PHE | 111 | -6.476  | 1.104 | 6.357 | 1.00 | 0.00 |
| ATOM | 1758 | HD1  | PHE | 111 | -7.540  | 1.062 | 6.126 | 1.00 | 0.00 |
| ATOM | 1759 | CE1  | PHE | 111 | -5.862  | 0.037 | 7.024 | 1.00 | 0.00 |



|      |      |         |     |        |        |       |      |      |
|------|------|---------|-----|--------|--------|-------|------|------|
| ATOM | 1760 | HE1 PHE | 111 | -6.450 | -0.834 | 7.314 | 1.00 | 0.00 |
| ATOM | 1761 | CZ PHE  | 111 | -4.494 | 0.088  | 7.319 | 1.00 | 0.00 |
| ATOM | 1762 | HZ PHE  | 111 | -4.016 | -0.744 | 7.837 | 1.00 | 0.00 |
| ATOM | 1763 | CE2 PHE | 111 | -3.740 | 1.208  | 6.948 | 1.00 | 0.00 |
| ATOM | 1764 | HE2 PHE | 111 | -2.675 | 1.249  | 7.178 | 1.00 | 0.00 |
| ATOM | 1765 | CD2 PHE | 111 | -4.354 | 2.275  | 6.282 | 1.00 | 0.00 |
| ATOM | 1766 | HD2 PHE | 111 | -3.767 | 3.146  | 5.993 | 1.00 | 0.00 |
| ATOM | 1767 | C PHE   | 111 | -6.157 | 5.482  | 6.594 | 1.00 | 0.00 |
| ATOM | 1768 | O PHE   | 111 | -5.071 | 5.331  | 7.116 | 1.00 | 0.00 |
| ATOM | 1769 | N ARG   | 112 | -6.594 | 6.670  | 6.273 | 1.00 | 0.00 |
| ATOM | 1770 | H ARG   | 112 | -7.496 | 6.805  | 5.840 | 1.00 | 0.00 |
| ATOM | 1771 | CA ARG  | 112 | -5.754 | 7.870  | 6.547 | 1.00 | 0.00 |
| ATOM | 1772 | HA ARG  | 112 | -4.903 | 7.899  | 5.866 | 1.00 | 0.00 |
| ATOM | 1773 | CB ARG  | 112 | -6.589 | 9.136  | 6.341 | 1.00 | 0.00 |
| ATOM | 1774 | HB2 ARG | 112 | -7.474 | 9.095  | 6.976 | 1.00 | 0.00 |
| ATOM | 1775 | HB3 ARG | 112 | -5.994 | 10.010 | 6.604 | 1.00 | 0.00 |
| ATOM | 1776 | CG ARG  | 112 | -7.017 | 9.232  | 4.874 | 1.00 | 0.00 |
| ATOM | 1777 | HG2 ARG | 112 | -6.135 | 9.199  | 4.234 | 1.00 | 0.00 |
| ATOM | 1778 | HG3 ARG | 112 | -7.673 | 8.396  | 4.630 | 1.00 | 0.00 |
| ATOM | 1779 | CD ARG  | 112 | -7.763 | 10.548 | 4.647 | 1.00 | 0.00 |

|      |      |      |     |     |         |        |        |      |      |
|------|------|------|-----|-----|---------|--------|--------|------|------|
| ATOM | 1780 | HD2  | ARG | 112 | -7.114  | 11.393 | 4.876  | 1.00 | 0.00 |
| ATOM | 1781 | HD3  | ARG | 112 | -8.098  | 10.618 | 3.612  | 1.00 | 0.00 |
| ATOM | 1782 | NE   | ARG | 112 | -8.954  | 10.604 | 5.540  | 1.00 | 0.00 |
| ATOM | 1783 | HE   | ARG | 112 | -9.652  | 9.873  | 5.535  | 1.00 | 0.00 |
| ATOM | 1784 | CZ   | ARG | 112 | -9.114  | 11.613 | 6.353  | 1.00 | 0.00 |
| ATOM | 1785 | NH1  | ARG | 112 | -8.665  | 11.541 | 7.576  | 1.00 | 0.00 |
| ATOM | 1786 | HH11 | ARG | 112 | -8.194  | 10.704 | 7.890  | 1.00 | 0.00 |
| ATOM | 1787 | HH12 | ARG | 112 | -8.790  | 12.322 | 8.203  | 1.00 | 0.00 |
| ATOM | 1788 | NH2  | ARG | 112 | -9.722  | 12.691 | 5.943  | 1.00 | 0.00 |
| ATOM | 1789 | HH21 | ARG | 112 | -10.068 | 12.742 | 4.996  | 1.00 | 0.00 |
| ATOM | 1790 | HH22 | ARG | 112 | -9.844  | 13.469 | 6.575  | 1.00 | 0.00 |
| ATOM | 1791 | C    | ARG | 112 | -5.255  | 7.819  | 7.992  | 1.00 | 0.00 |
| ATOM | 1792 | O    | ARG | 112 | -5.868  | 7.216  | 8.850  | 1.00 | 0.00 |
| ATOM | 1793 | N    | ALA | 113 | -4.145  | 8.449  | 8.270  | 1.00 | 0.00 |
| ATOM | 1794 | H    | ALA | 113 | -3.628  | 8.953  | 7.564  | 1.00 | 0.00 |
| ATOM | 1795 | CA   | ALA | 113 | -3.610  | 8.434  | 9.660  | 1.00 | 0.00 |
| ATOM | 1796 | HA   | ALA | 113 | -4.377  | 8.166  | 10.387 | 1.00 | 0.00 |
| ATOM | 1797 | CB   | ALA | 113 | -2.470  | 7.419  | 9.757  | 1.00 | 0.00 |
| ATOM | 1798 | HB1  | ALA | 113 | -1.690  | 7.678  | 9.041  | 1.00 | 0.00 |
| ATOM | 1799 | HB2  | ALA | 113 | -2.056  | 7.431  | 10.765 | 1.00 | 0.00 |

|      |      |     |     |     |        |        |        |      |      |
|------|------|-----|-----|-----|--------|--------|--------|------|------|
| ATOM | 1800 | HB3 | ALA | 113 | -2.850 | 6.422  | 9.533  | 1.00 | 0.00 |
| ATOM | 1801 | C   | ALA | 113 | -3.086 | 9.825  | 10.021 | 1.00 | 0.00 |
| ATOM | 1802 | O   | ALA | 113 | -2.866 | 10.657 | 9.163  | 1.00 | 0.00 |
| ATOM | 1803 | N   | PRO | 114 | -2.883 | 10.076 | 11.323 | 1.00 | 0.00 |
| ATOM | 1804 | CD  | PRO | 114 | -3.126 | 9.122  | 12.418 | 1.00 | 0.00 |
| ATOM | 1805 | HD2 | PRO | 114 | -2.662 | 8.165  | 12.176 | 1.00 | 0.00 |
| ATOM | 1806 | HD3 | PRO | 114 | -4.199 | 8.982  | 12.546 | 1.00 | 0.00 |
| ATOM | 1807 | CG  | PRO | 114 | -2.489 | 9.788  | 13.604 | 1.00 | 0.00 |
| ATOM | 1808 | HG2 | PRO | 114 | -1.465 | 9.430  | 13.713 | 1.00 | 0.00 |
| ATOM | 1809 | HG3 | PRO | 114 | -3.056 | 9.545  | 14.503 | 1.00 | 0.00 |
| ATOM | 1810 | CB  | PRO | 114 | -2.527 | 11.254 | 13.329 | 1.00 | 0.00 |
| ATOM | 1811 | HB2 | PRO | 114 | -1.669 | 11.715 | 13.818 | 1.00 | 0.00 |
| ATOM | 1812 | HB3 | PRO | 114 | -3.440 | 11.752 | 13.653 | 1.00 | 0.00 |
| ATOM | 1813 | CA  | PRO | 114 | -2.382 | 11.366 | 11.812 | 1.00 | 0.00 |
| ATOM | 1814 | HA  | PRO | 114 | -2.986 | 12.158 | 11.371 | 1.00 | 0.00 |
| ATOM | 1815 | C   | PRO | 114 | -0.912 | 11.580 | 11.442 | 1.00 | 0.00 |
| ATOM | 1816 | O   | PRO | 114 | -0.382 | 12.666 | 11.565 | 1.00 | 0.00 |
| ATOM | 1817 | N   | GLN | 115 | -0.250 | 10.551 | 10.987 | 1.00 | 0.00 |
| ATOM | 1818 | H   | GLN | 115 | -0.685 | 9.645  | 10.882 | 1.00 | 0.00 |
| ATOM | 1819 | CA  | GLN | 115 | 1.183  | 10.694 | 10.607 | 1.00 | 0.00 |

|      |      |      |     |     |       |        |        |      |      |
|------|------|------|-----|-----|-------|--------|--------|------|------|
| ATOM | 1820 | HA   | GLN | 115 | 1.598 | 11.608 | 11.031 | 1.00 | 0.00 |
| ATOM | 1821 | CB   | GLN | 115 | 1.975 | 9.501  | 11.147 | 1.00 | 0.00 |
| ATOM | 1822 | HB2  | GLN | 115 | 1.613 | 8.583  | 10.683 | 1.00 | 0.00 |
| ATOM | 1823 | HB3  | GLN | 115 | 3.032 | 9.631  | 10.915 | 1.00 | 0.00 |
| ATOM | 1824 | CG   | GLN | 115 | 1.793 | 9.411  | 12.664 | 1.00 | 0.00 |
| ATOM | 1825 | HG2  | GLN | 115 | 0.745 | 9.239  | 12.909 | 1.00 | 0.00 |
| ATOM | 1826 | HG3  | GLN | 115 | 2.398 | 8.601  | 13.072 | 1.00 | 0.00 |
| ATOM | 1827 | CD   | GLN | 115 | 2.237 | 10.725 | 13.309 | 1.00 | 0.00 |
| ATOM | 1828 | OE1  | GLN | 115 | 3.332 | 11.194 | 13.066 | 1.00 | 0.00 |
| ATOM | 1829 | NE2  | GLN | 115 | 1.430 | 11.342 | 14.127 | 1.00 | 0.00 |
| ATOM | 1830 | HE21 | GLN | 115 | 1.718 | 12.210 | 14.556 | 1.00 | 0.00 |
| ATOM | 1831 | HE22 | GLN | 115 | 0.522 | 10.948 | 14.327 | 1.00 | 0.00 |
| ATOM | 1832 | C    | GLN | 115 | 1.304 | 10.739 | 9.083  | 1.00 | 0.00 |
| ATOM | 1833 | O    | GLN | 115 | 0.492 | 10.182 | 8.369  | 1.00 | 0.00 |
| ATOM | 1834 | N    | ARG | 116 | 2.310 | 11.396 | 8.577  | 1.00 | 0.00 |
| ATOM | 1835 | H    | ARG | 116 | 2.988 | 11.861 | 9.163  | 1.00 | 0.00 |
| ATOM | 1836 | CA   | ARG | 116 | 2.481 | 11.475 | 7.099  | 1.00 | 0.00 |
| ATOM | 1837 | HA   | ARG | 116 | 1.655 | 10.972 | 6.595  | 1.00 | 0.00 |
| ATOM | 1838 | CB   | ARG | 116 | 2.499 | 12.942 | 6.665  | 1.00 | 0.00 |
| ATOM | 1839 | HB2  | ARG | 116 | 3.307 | 13.463 | 7.178  | 1.00 | 0.00 |

|      |      |      |     |     |        |        |       |      |      |
|------|------|------|-----|-----|--------|--------|-------|------|------|
| ATOM | 1840 | HB3  | ARG | 116 | 2.656  | 13.001 | 5.588 | 1.00 | 0.00 |
| ATOM | 1841 | CG   | ARG | 116 | 1.162  | 13.595 | 7.022 | 1.00 | 0.00 |
| ATOM | 1842 | HG2  | ARG | 116 | 0.351  | 13.050 | 6.539 | 1.00 | 0.00 |
| ATOM | 1843 | HG3  | ARG | 116 | 1.023  | 13.570 | 8.103 | 1.00 | 0.00 |
| ATOM | 1844 | CD   | ARG | 116 | 1.159  | 15.047 | 6.540 | 1.00 | 0.00 |
| ATOM | 1845 | HD2  | ARG | 116 | 2.073  | 15.551 | 6.854 | 1.00 | 0.00 |
| ATOM | 1846 | HD3  | ARG | 116 | 1.080  | 15.084 | 5.453 | 1.00 | 0.00 |
| ATOM | 1847 | NE   | ARG | 116 | -0.008 | 15.763 | 7.129 | 1.00 | 0.00 |
| ATOM | 1848 | HE   | ARG | 116 | 0.086  | 16.333 | 7.957 | 1.00 | 0.00 |
| ATOM | 1849 | CZ   | ARG | 116 | -1.183 | 15.663 | 6.572 | 1.00 | 0.00 |
| ATOM | 1850 | NH1  | ARG | 116 | -1.400 | 14.751 | 5.664 | 1.00 | 0.00 |
| ATOM | 1851 | HH11 | ARG | 116 | -0.655 | 14.123 | 5.395 | 1.00 | 0.00 |
| ATOM | 1852 | HH12 | ARG | 116 | -2.311 | 14.676 | 5.235 | 1.00 | 0.00 |
| ATOM | 1853 | NH2  | ARG | 116 | -2.144 | 16.473 | 6.925 | 1.00 | 0.00 |
| ATOM | 1854 | HH21 | ARG | 116 | -1.974 | 17.176 | 7.630 | 1.00 | 0.00 |
| ATOM | 1855 | HH22 | ARG | 116 | -3.052 | 16.392 | 6.492 | 1.00 | 0.00 |
| ATOM | 1856 | C    | ARG | 116 | 3.799  | 10.809 | 6.700 | 1.00 | 0.00 |
| ATOM | 1857 | O    | ARG | 116 | 4.744  | 10.777 | 7.462 | 1.00 | 0.00 |
| ATOM | 1858 | N    | CYX | 117 | 3.869  | 10.274 | 5.512 | 1.00 | 0.00 |
| ATOM | 1859 | H    | CYX | 117 | 3.087  | 10.296 | 4.873 | 1.00 | 0.00 |

|      |      |     |     |     |        |        |       |      |      |
|------|------|-----|-----|-----|--------|--------|-------|------|------|
| ATOM | 1860 | CA  | CYX | 117 | 5.125  | 9.610  | 5.067 | 1.00 | 0.00 |
| ATOM | 1861 | HA  | CYX | 117 | 5.856  | 9.602  | 5.876 | 1.00 | 0.00 |
| ATOM | 1862 | CB  | CYX | 117 | 4.824  | 8.164  | 4.666 | 1.00 | 0.00 |
| ATOM | 1863 | HB2 | CYX | 117 | 4.051  | 8.152  | 3.898 | 1.00 | 0.00 |
| ATOM | 1864 | HB3 | CYX | 117 | 5.729  | 7.698  | 4.276 | 1.00 | 0.00 |
| ATOM | 1865 | SG  | CYX | 117 | 4.194  | 7.259  | 6.101 | 1.00 | 0.00 |
| ATOM | 1866 | C   | CYX | 117 | 5.701  | 10.361 | 3.865 | 1.00 | 0.00 |
| ATOM | 1867 | O   | CYX | 117 | 5.004  | 11.079 | 3.177 | 1.00 | 0.00 |
| ATOM | 1868 | N   | ASP | 118 | 6.971  | 10.200 | 3.606 | 1.00 | 0.00 |
| ATOM | 1869 | H   | ASP | 118 | 7.558  | 9.605  | 4.173 | 1.00 | 0.00 |
| ATOM | 1870 | CA  | ASP | 118 | 7.589  | 10.905 | 2.448 | 1.00 | 0.00 |
| ATOM | 1871 | HA  | ASP | 118 | 7.296  | 11.954 | 2.444 | 1.00 | 0.00 |
| ATOM | 1872 | CB  | ASP | 118 | 9.113  | 10.824 | 2.556 | 1.00 | 0.00 |
| ATOM | 1873 | HB2 | ASP | 118 | 9.424  | 9.779  | 2.568 | 1.00 | 0.00 |
| ATOM | 1874 | HB3 | ASP | 118 | 9.564  | 11.326 | 1.700 | 1.00 | 0.00 |
| ATOM | 1875 | CG  | ASP | 118 | 9.570  | 11.506 | 3.847 | 1.00 | 0.00 |
| ATOM | 1876 | OD1 | ASP | 118 | 8.776  | 12.231 | 4.424 | 1.00 | 0.00 |
| ATOM | 1877 | OD2 | ASP | 118 | 10.706 | 11.290 | 4.238 | 1.00 | 0.00 |
| ATOM | 1878 | C   | ASP | 118 | 7.133  | 10.243 | 1.146 | 1.00 | 0.00 |
| ATOM | 1879 | O   | ASP | 118 | 6.920  | 9.049  | 1.088 | 1.00 | 0.00 |

|      |      |      |     |     |       |        |        |      |      |
|------|------|------|-----|-----|-------|--------|--------|------|------|
| ATOM | 1880 | N    | LEU | 119 | 6.979 | 11.011 | 0.102  | 1.00 | 0.00 |
| ATOM | 1881 | H    | LEU | 119 | 7.154 | 12.004 | 0.143  | 1.00 | 0.00 |
| ATOM | 1882 | CA   | LEU | 119 | 6.534 | 10.425 | -1.193 | 1.00 | 0.00 |
| ATOM | 1883 | HA   | LEU | 119 | 5.722 | 9.717  | -1.029 | 1.00 | 0.00 |
| ATOM | 1884 | CB   | LEU | 119 | 6.032 | 11.542 | -2.110 | 1.00 | 0.00 |
| ATOM | 1885 | HB2  | LEU | 119 | 6.733 | 12.376 | -2.083 | 1.00 | 0.00 |
| ATOM | 1886 | HB3  | LEU | 119 | 5.951 | 11.168 | -3.131 | 1.00 | 0.00 |
| ATOM | 1887 | CG   | LEU | 119 | 4.658 | 12.015 | -1.630 | 1.00 | 0.00 |
| ATOM | 1888 | HG   | LEU | 119 | 4.051 | 11.151 | -1.358 | 1.00 | 0.00 |
| ATOM | 1889 | CD1  | LEU | 119 | 4.829 | 12.923 | -0.411 | 1.00 | 0.00 |
| ATOM | 1890 | HD11 | LEU | 119 | 5.436 | 13.786 | -0.683 | 1.00 | 0.00 |
| ATOM | 1891 | HD12 | LEU | 119 | 3.851 | 13.260 | -0.069 | 1.00 | 0.00 |
| ATOM | 1892 | HD13 | LEU | 119 | 5.323 | 12.370 | 0.388  | 1.00 | 0.00 |
| ATOM | 1893 | CD2  | LEU | 119 | 3.963 | 12.790 | -2.751 | 1.00 | 0.00 |
| ATOM | 1894 | HD21 | LEU | 119 | 3.841 | 12.142 | -3.619 | 1.00 | 0.00 |
| ATOM | 1895 | HD22 | LEU | 119 | 2.985 | 13.126 | -2.408 | 1.00 | 0.00 |
| ATOM | 1896 | HD23 | LEU | 119 | 4.568 | 13.654 | -3.025 | 1.00 | 0.00 |
| ATOM | 1897 | C    | LEU | 119 | 7.708 | 9.706  | -1.861 | 1.00 | 0.00 |
| ATOM | 1898 | O    | LEU | 119 | 7.527 | 8.860  | -2.713 | 1.00 | 0.00 |
| ATOM | 1899 | N    | ASP | 120 | 8.913 | 10.034 | -1.479 | 1.00 | 0.00 |

|      |      |      |     |     |        |        |        |      |      |
|------|------|------|-----|-----|--------|--------|--------|------|------|
| ATOM | 1900 | H    | ASP | 120 | 9.074  | 10.737 | -0.772 | 1.00 | 0.00 |
| ATOM | 1901 | CA   | ASP | 120 | 10.095 | 9.366  | -2.093 | 1.00 | 0.00 |
| ATOM | 1902 | HA   | ASP | 120 | 10.039 | 9.423  | -3.180 | 1.00 | 0.00 |
| ATOM | 1903 | CB   | ASP | 120 | 11.375 | 10.066 | -1.632 | 1.00 | 0.00 |
| ATOM | 1904 | HB2  | ASP | 120 | 12.238 | 9.594  | -2.102 | 1.00 | 0.00 |
| ATOM | 1905 | HB3  | ASP | 120 | 11.337 | 11.117 | -1.916 | 1.00 | 0.00 |
| ATOM | 1906 | CG   | ASP | 120 | 11.497 | 9.953  | -0.111 | 1.00 | 0.00 |
| ATOM | 1907 | OD1  | ASP | 120 | 10.487 | 9.709  | 0.529  | 1.00 | 0.00 |
| ATOM | 1908 | OD2  | ASP | 120 | 12.599 | 10.112 | 0.388  | 1.00 | 0.00 |
| ATOM | 1909 | C    | ASP | 120 | 10.132 | 7.898  | -1.664 | 1.00 | 0.00 |
| ATOM | 1910 | O    | ASP | 120 | 10.591 | 7.040  | -2.391 | 1.00 | 0.00 |
| ATOM | 1911 | N    | VAL | 121 | 9.654  | 7.603  | -0.486 | 1.00 | 0.00 |
| ATOM | 1912 | H    | VAL | 121 | 9.272  | 8.310  | 0.124  | 1.00 | 0.00 |
| ATOM | 1913 | CA   | VAL | 121 | 9.663  | 6.190  | -0.011 | 1.00 | 0.00 |
| ATOM | 1914 | HA   | VAL | 121 | 10.688 | 5.837  | 0.109  | 1.00 | 0.00 |
| ATOM | 1915 | CB   | VAL | 121 | 8.955  | 6.104  | 1.343  | 1.00 | 0.00 |
| ATOM | 1916 | HB   | VAL | 121 | 7.994  | 6.614  | 1.284  | 1.00 | 0.00 |
| ATOM | 1917 | CG1  | VAL | 121 | 8.730  | 4.635  | 1.709  | 1.00 | 0.00 |
| ATOM | 1918 | HG11 | VAL | 121 | 9.691  | 4.123  | 1.769  | 1.00 | 0.00 |
| ATOM | 1919 | HG12 | VAL | 121 | 8.226  | 4.573  | 2.673  | 1.00 | 0.00 |



|      |      |      |     |     |        |       |        |      |      |
|------|------|------|-----|-----|--------|-------|--------|------|------|
| ATOM | 1920 | HG13 | VAL | 121 | 8.113  | 4.160 | 0.946  | 1.00 | 0.00 |
| ATOM | 1921 | CG2  | VAL | 121 | 9.822  | 6.769 | 2.414  | 1.00 | 0.00 |
| ATOM | 1922 | HG21 | VAL | 121 | 9.983  | 7.815 | 2.154  | 1.00 | 0.00 |
| ATOM | 1923 | HG22 | VAL | 121 | 9.319  | 6.708 | 3.379  | 1.00 | 0.00 |
| ATOM | 1924 | HG23 | VAL | 121 | 10.783 | 6.257 | 2.473  | 1.00 | 0.00 |
| ATOM | 1925 | C    | VAL | 121 | 8.933  | 5.306 | -1.025 | 1.00 | 0.00 |
| ATOM | 1926 | O    | VAL | 121 | 9.406  | 4.251 | -1.397 | 1.00 | 0.00 |
| ATOM | 1927 | N    | SER | 122 | 7.785  | 5.729 | -1.476 | 1.00 | 0.00 |
| ATOM | 1928 | H    | SER | 122 | 7.386  | 6.605 | -1.171 | 1.00 | 0.00 |
| ATOM | 1929 | CA   | SER | 122 | 7.026  | 4.913 | -2.466 | 1.00 | 0.00 |
| ATOM | 1930 | HA   | SER | 122 | 6.768  | 3.944 | -2.038 | 1.00 | 0.00 |
| ATOM | 1931 | CB   | SER | 122 | 5.734  | 5.640 | -2.845 | 1.00 | 0.00 |
| ATOM | 1932 | HB2  | SER | 122 | 5.977  | 6.571 | -3.357 | 1.00 | 0.00 |
| ATOM | 1933 | HB3  | SER | 122 | 5.141  | 5.007 | -3.505 | 1.00 | 0.00 |
| ATOM | 1934 | OG   | SER | 122 | 4.990  | 5.926 | -1.670 | 1.00 | 0.00 |
| ATOM | 1935 | HG   | SER | 122 | 4.180  | 6.382 | -1.908 | 1.00 | 0.00 |
| ATOM | 1936 | C    | SER | 122 | 7.880  | 4.705 | -3.718 | 1.00 | 0.00 |
| ATOM | 1937 | O    | SER | 122 | 7.828  | 3.671 | -4.353 | 1.00 | 0.00 |
| ATOM | 1938 | N    | GLY | 123 | 8.667  | 5.682 | -4.080 | 1.00 | 0.00 |
| ATOM | 1939 | H    | GLY | 123 | 8.716  | 6.545 | -3.558 | 1.00 | 0.00 |

|      |      |     |     |     |        |        |        |      |      |
|------|------|-----|-----|-----|--------|--------|--------|------|------|
| ATOM | 1940 | CA  | GLY | 123 | 9.523  | 5.539  | -5.291 | 1.00 | 0.00 |
| ATOM | 1941 | HA2 | GLY | 123 | 9.033  | 4.891  | -6.018 | 1.00 | 0.00 |
| ATOM | 1942 | HA3 | GLY | 123 | 9.701  | 6.517  | -5.738 | 1.00 | 0.00 |
| ATOM | 1943 | C   | GLY | 123 | 10.865 | 4.920  | -4.898 | 1.00 | 0.00 |
| ATOM | 1944 | O   | GLY | 123 | 11.810 | 4.923  | -5.662 | 1.00 | 0.00 |
| ATOM | 1945 | N   | GLY | 124 | 10.957 | 4.385  | -3.710 | 1.00 | 0.00 |
| ATOM | 1946 | H   | GLY | 124 | 10.177 | 4.377  | -3.069 | 1.00 | 0.00 |
| ATOM | 1947 | CA  | GLY | 124 | 12.238 | 3.765  | -3.270 | 1.00 | 0.00 |
| ATOM | 1948 | HA2 | GLY | 124 | 13.046 | 4.494  | -3.334 | 1.00 | 0.00 |
| ATOM | 1949 | HA3 | GLY | 124 | 12.147 | 3.412  | -2.242 | 1.00 | 0.00 |
| ATOM | 1950 | C   | GLY | 124 | 12.568 | 2.577  | -4.176 | 1.00 | 0.00 |
| ATOM | 1951 | O   | GLY | 124 | 12.579 | 2.690  | -5.385 | 1.00 | 0.00 |
| ATOM | 1952 | N   | ARG | 125 | 12.837 | 1.436  | -3.600 | 1.00 | 0.00 |
| ATOM | 1953 | H   | ARG | 125 | 12.830 | 1.332  | -2.595 | 1.00 | 0.00 |
| ATOM | 1954 | CA  | ARG | 125 | 13.164 | 0.243  | -4.430 | 1.00 | 0.00 |
| ATOM | 1955 | HA  | ARG | 125 | 14.038 | 0.441  | -5.051 | 1.00 | 0.00 |
| ATOM | 1956 | CB  | ARG | 125 | 13.474 | -0.945 | -3.515 | 1.00 | 0.00 |
| ATOM | 1957 | HB2 | ARG | 125 | 12.649 | -1.094 | -2.819 | 1.00 | 0.00 |
| ATOM | 1958 | HB3 | ARG | 125 | 13.607 | -1.844 | -4.117 | 1.00 | 0.00 |
| ATOM | 1959 | CG  | ARG | 125 | 14.757 | -0.662 | -2.732 | 1.00 | 0.00 |

|      |      |      |     |     |        |        |        |      |      |
|------|------|------|-----|-----|--------|--------|--------|------|------|
| ATOM | 1960 | HG2  | ARG | 125 | 15.556 | -0.399 | -3.425 | 1.00 | 0.00 |
| ATOM | 1961 | HG3  | ARG | 125 | 14.588 | 0.165  | -2.043 | 1.00 | 0.00 |
| ATOM | 1962 | CD   | ARG | 125 | 15.158 | -1.910 | -1.942 | 1.00 | 0.00 |
| ATOM | 1963 | HD2  | ARG | 125 | 14.305 | -2.295 | -1.384 | 1.00 | 0.00 |
| ATOM | 1964 | HD3  | ARG | 125 | 15.528 | -2.682 | -2.617 | 1.00 | 0.00 |
| ATOM | 1965 | NE   | ARG | 125 | 16.240 | -1.560 | -0.979 | 1.00 | 0.00 |
| ATOM | 1966 | HE   | ARG | 125 | 16.174 | -0.748 | -0.382 | 1.00 | 0.00 |
| ATOM | 1967 | CZ   | ARG | 125 | 17.304 | -2.310 | -0.893 | 1.00 | 0.00 |
| ATOM | 1968 | NH1  | ARG | 125 | 17.906 | -2.716 | -1.978 | 1.00 | 0.00 |
| ATOM | 1969 | HH11 | ARG | 125 | 17.546 | -2.448 | -2.883 | 1.00 | 0.00 |
| ATOM | 1970 | HH12 | ARG | 125 | 18.730 | -3.297 | -1.908 | 1.00 | 0.00 |
| ATOM | 1971 | NH2  | ARG | 125 | 17.767 | -2.655 | 0.277  | 1.00 | 0.00 |
| ATOM | 1972 | HH21 | ARG | 125 | 17.300 | -2.340 | 1.115  | 1.00 | 0.00 |
| ATOM | 1973 | HH22 | ARG | 125 | 18.591 | -3.236 | 0.339  | 1.00 | 0.00 |
| ATOM | 1974 | C    | ARG | 125 | 11.969 | -0.099 | -5.322 | 1.00 | 0.00 |
| ATOM | 1975 | O    | ARG | 125 | 12.125 | -0.586 | -6.426 | 1.00 | 0.00 |
| ATOM | 1976 | N    | CYX | 126 | 10.778 | 0.152  | -4.856 | 1.00 | 0.00 |
| ATOM | 1977 | H    | CYX | 126 | 10.642 | 0.556  | -3.941 | 1.00 | 0.00 |
| ATOM | 1978 | CA   | CYX | 126 | 9.574  | -0.158 | -5.678 | 1.00 | 0.00 |
| ATOM | 1979 | HA   | CYX | 126 | 9.551  | -1.218 | -5.931 | 1.00 | 0.00 |

|      |      |     |     |     |        |         |         |      |      |
|------|------|-----|-----|-----|--------|---------|---------|------|------|
| ATOM | 1980 | CB  | CYX | 126 | 8.313  | 0.182   | -4.882  | 1.00 | 0.00 |
| ATOM | 1981 | HB2 | CYX | 126 | 8.378  | 1.207   | -4.519  | 1.00 | 0.00 |
| ATOM | 1982 | HB3 | CYX | 126 | 7.439  | 0.078   | -5.524  | 1.00 | 0.00 |
| ATOM | 1983 | SG  | CYX | 126 | 8.197  | -0.907  | -3.442  | 1.00 | 0.00 |
| ATOM | 1984 | C   | CYX | 126 | 9.608  | 0.674   | -6.962  | 1.00 | 0.00 |
| ATOM | 1985 | O   | CYX | 126 | 9.002  | 0.324   | -7.956  | 1.00 | 0.00 |
| ATOM | 1986 | N   | SER | 127 | 10.313 | 1.771   | -6.950  | 1.00 | 0.00 |
| ATOM | 1987 | H   | SER | 127 | 10.821 | 2.065   | -6.128  | 1.00 | 0.00 |
| ATOM | 1988 | CA  | SER | 127 | 10.387 | 2.624   | -8.169  | 1.00 | 0.00 |
| ATOM | 1989 | HA  | SER | 127 | 11.060 | 3.465   | -8.002  | 1.00 | 0.00 |
| ATOM | 1990 | CB  | SER | 127 | 10.921 | 1.796   | -9.340  | 1.00 | 0.00 |
| ATOM | 1991 | HB2 | SER | 127 | 12.001 | 1.923   | -9.413  | 1.00 | 0.00 |
| ATOM | 1992 | HB3 | SER | 127 | 10.691 | 0.743   | -9.176  | 1.00 | 0.00 |
| ATOM | 1993 | OG  | SER | 127 | 10.311 | 2.231   | -10.546 | 1.00 | 0.00 |
| ATOM | 1994 | HG  | SER | 127 | 10.647 | 1.711   | -11.280 | 1.00 | 0.00 |
| ATOM | 1995 | C   | SER | 127 | 8.989  | 3.146   | -8.512  | 1.00 | 0.00 |
| ATOM | 1996 | O   | SER | 127 | 8.040  | 2.684   | -7.901  | 1.00 | 0.00 |
| ATOM | 1997 | OXT | SER | 127 | 8.893  | 4.001   | -9.377  | 1.00 | 0.00 |
| TER  |      |     |     |     |        |         |         |      |      |
| ATOM | 1998 | CI1 | LIG | 128 | -1.688 | -19.925 | -10.373 | 1.00 | 0.00 |

|      |      |     |     |     |         |         |        |      |      |
|------|------|-----|-----|-----|---------|---------|--------|------|------|
| ATOM | 1999 | Cl2 | LIG | 128 | -1.582  | -21.743 | -8.056 | 1.00 | 0.00 |
| ATOM | 2000 | P1  | LIG | 128 | 1.706   | -18.960 | -6.425 | 1.00 | 0.00 |
| ATOM | 2001 | O1  | LIG | 128 | 1.427   | -19.025 | -4.856 | 1.00 | 0.00 |
| ATOM | 2002 | O2  | LIG | 128 | 2.899   | -19.988 | -6.599 | 1.00 | 0.00 |
| ATOM | 2003 | O3  | LIG | 128 | 0.375   | -19.744 | -6.996 | 1.00 | 0.00 |
| ATOM | 2004 | O4  | LIG | 128 | 1.920   | -17.652 | -7.061 | 1.00 | 0.00 |
| ATOM | 2005 | C1  | LIG | 128 | 0.393   | -18.224 | -4.240 | 1.00 | 0.00 |
| ATOM | 2006 | H1  | LIG | 128 | 0.513   | -18.358 | -3.167 | 1.00 | 0.00 |
| ATOM | 2007 | H2  | LIG | 128 | -0.590  | -18.581 | -4.553 | 1.00 | 0.00 |
| ATOM | 2008 | H3  | LIG | 128 | 0.521   | -17.174 | -4.503 | 1.00 | 0.00 |
| ATOM | 2009 | C2  | LIG | 128 | 2.890   | -21.326 | -6.049 | 1.00 | 0.00 |
| ATOM | 2010 | H4  | LIG | 128 | 2.023   | -21.879 | -6.414 | 1.00 | 0.00 |
| ATOM | 2011 | H5  | LIG | 128 | 2.881   | -21.280 | -4.960 | 1.00 | 0.00 |
| ATOM | 2012 | H6  | LIG | 128 | 3.807   | -21.794 | -6.400 | 1.00 | 0.00 |
| ATOM | 2013 | C3  | LIG | 128 | -0.127  | -19.475 | -8.243 | 1.00 | 0.00 |
| ATOM | 2014 | H7  | LIG | 128 | 0.216   | -18.568 | -8.726 | 1.00 | 0.00 |
| ATOM | 2015 | C4  | LIG | 128 | -1.016  | -20.288 | -8.810 | 1.00 | 0.00 |
| TER  |      |     |     |     |         |         |        |      |      |
| ATOM | 2016 | Cl1 | LIG | 129 | -30.035 | 10.684  | 8.969  | 1.00 | 0.00 |
| ATOM | 2017 | Cl2 | LIG | 129 | -29.917 | 13.575  | 9.532  | 1.00 | 0.00 |

|      |      |     |     |     |         |         |        |      |      |
|------|------|-----|-----|-----|---------|---------|--------|------|------|
| ATOM | 2018 | P1  | LIG | 129 | -26.028 | 13.573  | 7.063  | 1.00 | 0.00 |
| ATOM | 2019 | O1  | LIG | 129 | -26.100 | 15.001  | 6.357  | 1.00 | 0.00 |
| ATOM | 2020 | O2  | LIG | 129 | -25.054 | 13.848  | 8.283  | 1.00 | 0.00 |
| ATOM | 2021 | O3  | LIG | 129 | -27.535 | 13.493  | 7.725  | 1.00 | 0.00 |
| ATOM | 2022 | O4  | LIG | 129 | -25.691 | 12.392  | 6.256  | 1.00 | 0.00 |
| ATOM | 2023 | C1  | LIG | 129 | -26.897 | 15.217  | 5.170  | 1.00 | 0.00 |
| ATOM | 2024 | H1  | LIG | 129 | -26.657 | 16.222  | 4.829  | 1.00 | 0.00 |
| ATOM | 2025 | H2  | LIG | 129 | -27.957 | 15.150  | 5.416  | 1.00 | 0.00 |
| ATOM | 2026 | H3  | LIG | 129 | -26.635 | 14.489  | 4.402  | 1.00 | 0.00 |
| ATOM | 2027 | C2  | LIG | 129 | -25.208 | 14.958  | 9.197  | 1.00 | 0.00 |
| ATOM | 2028 | H4  | LIG | 129 | -26.195 | 14.932  | 9.661  | 1.00 | 0.00 |
| ATOM | 2029 | H5  | LIG | 129 | -25.063 | 15.899  | 8.666  | 1.00 | 0.00 |
| ATOM | 2030 | H6  | LIG | 129 | -24.436 | 14.827  | 9.951  | 1.00 | 0.00 |
| ATOM | 2031 | C3  | LIG | 129 | -28.148 | 12.287  | 7.946  | 1.00 | 0.00 |
| ATOM | 2032 | H7  | LIG | 129 | -27.730 | 11.423  | 7.447  | 1.00 | 0.00 |
| ATOM | 2033 | C4  | LIG | 129 | -29.227 | 12.205  | 8.723  | 1.00 | 0.00 |
| TER  |      |     |     |     |         |         |        |      |      |
| ATOM | 2034 | Cl1 | LIG | 130 | 17.497  | -15.178 | 23.042 | 1.00 | 0.00 |
| ATOM | 2035 | Cl2 | LIG | 130 | 20.159  | -14.691 | 24.209 | 1.00 | 0.00 |
| ATOM | 2036 | P1  | LIG | 130 | 17.959  | -12.160 | 27.367 | 1.00 | 0.00 |

|      |      |     |     |     |         |         |        |      |      |
|------|------|-----|-----|-----|---------|---------|--------|------|------|
| ATOM | 2037 | O1  | LIG | 130 | 18.839  | -12.441 | 28.668 | 1.00 | 0.00 |
| ATOM | 2038 | O2  | LIG | 130 | 18.516  | -10.759 | 26.878 | 1.00 | 0.00 |
| ATOM | 2039 | O3  | LIG | 130 | 18.603  | -13.266 | 26.329 | 1.00 | 0.00 |
| ATOM | 2040 | O4  | LIG | 130 | 16.495  | -12.245 | 27.462 | 1.00 | 0.00 |
| ATOM | 2041 | C1  | LIG | 130 | 18.663  | -13.642 | 29.454 | 1.00 | 0.00 |
| ATOM | 2042 | H1  | LIG | 130 | 19.280  | -13.511 | 30.340 | 1.00 | 0.00 |
| ATOM | 2043 | H2  | LIG | 130 | 19.001  | -14.511 | 28.887 | 1.00 | 0.00 |
| ATOM | 2044 | H3  | LIG | 130 | 17.616  | -13.756 | 29.740 | 1.00 | 0.00 |
| ATOM | 2045 | C2  | LIG | 130 | 19.924  | -10.468 | 26.720 | 1.00 | 0.00 |
| ATOM | 2046 | H4  | LIG | 130 | 20.382  | -11.178 | 26.031 | 1.00 | 0.00 |
| ATOM | 2047 | H5  | LIG | 130 | 20.422  | -10.504 | 27.690 | 1.00 | 0.00 |
| ATOM | 2048 | H6  | LIG | 130 | 19.971  | -9.462  | 26.309 | 1.00 | 0.00 |
| ATOM | 2049 | C3  | LIG | 130 | 17.858  | -13.797 | 25.307 | 1.00 | 0.00 |
| ATOM | 2050 | H7  | LIG | 130 | 16.785  | -13.665 | 25.361 | 1.00 | 0.00 |
| ATOM | 2051 | C4  | LIG | 130 | 18.443  | -14.465 | 24.315 | 1.00 | 0.00 |
| TER  |      |     |     |     |         |         |        |      |      |
| ATOM | 2052 | Cl1 | LIG | 131 | -9.807  | -11.525 | 23.140 | 1.00 | 0.00 |
| ATOM | 2053 | Cl2 | LIG | 131 | -11.347 | -9.229  | 24.162 | 1.00 | 0.00 |
| ATOM | 2054 | P1  | LIG | 131 | -8.073  | -8.876  | 27.383 | 1.00 | 0.00 |
| ATOM | 2055 | O1  | LIG | 131 | -8.000  | -7.295  | 27.588 | 1.00 | 0.00 |

|      |      |     |     |     |         |         |        |      |      |
|------|------|-----|-----|-----|---------|---------|--------|------|------|
| ATOM | 2056 | O2  | LIG | 131 | -8.982  | -9.332  | 28.598 | 1.00 | 0.00 |
| ATOM | 2057 | O3  | LIG | 131 | -9.051  | -8.958  | 26.059 | 1.00 | 0.00 |
| ATOM | 2058 | O4  | LIG | 131 | -6.826  | -9.636  | 27.225 | 1.00 | 0.00 |
| ATOM | 2059 | C1  | LIG | 131 | -7.252  | -6.451  | 26.683 | 1.00 | 0.00 |
| ATOM | 2060 | H1  | LIG | 131 | -7.257  | -5.459  | 27.130 | 1.00 | 0.00 |
| ATOM | 2061 | H2  | LIG | 131 | -7.742  | -6.424  | 25.709 | 1.00 | 0.00 |
| ATOM | 2062 | H3  | LIG | 131 | -6.228  | -6.813  | 26.588 | 1.00 | 0.00 |
| ATOM | 2063 | C2  | LIG | 131 | -10.248 | -8.714  | 28.929 | 1.00 | 0.00 |
| ATOM | 2064 | H4  | LIG | 131 | -10.925 | -8.757  | 28.075 | 1.00 | 0.00 |
| ATOM | 2065 | H5  | LIG | 131 | -10.087 | -7.679  | 29.234 | 1.00 | 0.00 |
| ATOM | 2066 | H6  | LIG | 131 | -10.651 | -9.293  | 29.756 | 1.00 | 0.00 |
| ATOM | 2067 | C3  | LIG | 131 | -8.970  | -10.009 | 25.183 | 1.00 | 0.00 |
| ATOM | 2068 | H7  | LIG | 131 | -8.089  | -10.635 | 25.245 | 1.00 | 0.00 |
| ATOM | 2069 | C4  | LIG | 131 | -9.929  | -10.220 | 24.283 | 1.00 | 0.00 |
| TER  |      |     |     |     |         |         |        |      |      |
| ATOM | 2070 | Cl1 | LIG | 132 | 15.954  | 16.326  | 3.519  | 1.00 | 0.00 |
| ATOM | 2071 | Cl2 | LIG | 132 | 17.202  | 17.794  | 1.288  | 1.00 | 0.00 |
| ATOM | 2072 | P1  | LIG | 132 | 20.175  | 19.392  | 4.422  | 1.00 | 0.00 |
| ATOM | 2073 | O1  | LIG | 132 | 21.517  | 19.487  | 3.566  | 1.00 | 0.00 |
| ATOM | 2074 | O2  | LIG | 132 | 19.654  | 20.889  | 4.401  | 1.00 | 0.00 |



|      |      |     |     |     |        |         |        |      |      |
|------|------|-----|-----|-----|--------|---------|--------|------|------|
| ATOM | 2075 | O3  | LIG | 132 | 19.205 | 18.584  | 3.364  | 1.00 | 0.00 |
| ATOM | 2076 | O4  | LIG | 132 | 20.217 | 18.771  | 5.753  | 1.00 | 0.00 |
| ATOM | 2077 | C1  | LIG | 132 | 22.342 | 18.324  | 3.323  | 1.00 | 0.00 |
| ATOM | 2078 | H1  | LIG | 132 | 23.245 | 18.694  | 2.843  | 1.00 | 0.00 |
| ATOM | 2079 | H2  | LIG | 132 | 21.822 | 17.632  | 2.659  | 1.00 | 0.00 |
| ATOM | 2080 | H3  | LIG | 132 | 22.592 | 17.835  | 4.266  | 1.00 | 0.00 |
| ATOM | 2081 | C2  | LIG | 132 | 19.538 | 21.680  | 3.195  | 1.00 | 0.00 |
| ATOM | 2082 | H4  | LIG | 132 | 18.894 | 21.176  | 2.473  | 1.00 | 0.00 |
| ATOM | 2083 | H5  | LIG | 132 | 20.527 | 21.852  | 2.768  | 1.00 | 0.00 |
| ATOM | 2084 | H6  | LIG | 132 | 19.091 | 22.622  | 3.504  | 1.00 | 0.00 |
| ATOM | 2085 | C3  | LIG | 132 | 18.177 | 17.792  | 3.807  | 1.00 | 0.00 |
| ATOM | 2086 | H7  | LIG | 132 | 18.185 | 17.516  | 4.854  | 1.00 | 0.00 |
| ATOM | 2087 | C4  | LIG | 132 | 17.234 | 17.368  | 2.969  | 1.00 | 0.00 |
| TER  |      |     |     |     |        |         |        |      |      |
| ATOM | 2088 | Cl1 | LIG | 133 | 27.650 | -11.363 | 25.200 | 1.00 | 0.00 |
| ATOM | 2089 | Cl2 | LIG | 133 | 28.681 | -10.228 | 27.717 | 1.00 | 0.00 |
| ATOM | 2090 | P1  | LIG | 133 | 28.343 | -6.133  | 25.635 | 1.00 | 0.00 |
| ATOM | 2091 | O1  | LIG | 133 | 27.937 | -5.189  | 26.856 | 1.00 | 0.00 |
| ATOM | 2092 | O2  | LIG | 133 | 29.902 | -5.876  | 25.514 | 1.00 | 0.00 |
| ATOM | 2093 | O3  | LIG | 133 | 28.204 | -7.613  | 26.345 | 1.00 | 0.00 |

|      |      |     |     |     |        |         |        |      |      |
|------|------|-----|-----|-----|--------|---------|--------|------|------|
| ATOM | 2094 | O4  | LIG | 133 | 27.599 | -6.029  | 24.372 | 1.00 | 0.00 |
| ATOM | 2095 | C1  | LIG | 133 | 26.571 | -5.106  | 27.323 | 1.00 | 0.00 |
| ATOM | 2096 | H1  | LIG | 133 | 26.556 | -4.302  | 28.056 | 1.00 | 0.00 |
| ATOM | 2097 | H2  | LIG | 133 | 26.281 | -6.046  | 27.794 | 1.00 | 0.00 |
| ATOM | 2098 | H3  | LIG | 133 | 25.902 | -4.870  | 26.495 | 1.00 | 0.00 |
| ATOM | 2099 | C2  | LIG | 133 | 30.813 | -5.928  | 26.637 | 1.00 | 0.00 |
| ATOM | 2100 | H4  | LIG | 133 | 30.753 | -6.900  | 27.128 | 1.00 | 0.00 |
| ATOM | 2101 | H5  | LIG | 133 | 30.577 | -5.130  | 27.343 | 1.00 | 0.00 |
| ATOM | 2102 | H6  | LIG | 133 | 31.805 | -5.780  | 26.218 | 1.00 | 0.00 |
| ATOM | 2103 | C3  | LIG | 133 | 27.908 | -8.729  | 25.607 | 1.00 | 0.00 |
| ATOM | 2104 | H7  | LIG | 133 | 27.522 | -8.569  | 24.607 | 1.00 | 0.00 |
| ATOM | 2105 | C4  | LIG | 133 | 28.068 | -9.947  | 26.119 | 1.00 | 0.00 |
| TER  |      |     |     |     |        |         |        |      |      |
| ATOM | 2106 | Cl1 | LIG | 134 | 15.646 | -19.854 | 10.645 | 1.00 | 0.00 |
| ATOM | 2107 | Cl2 | LIG | 134 | 18.194 | -19.074 | 9.386  | 1.00 | 0.00 |
| ATOM | 2108 | P1  | LIG | 134 | 19.847 | -18.755 | 13.674 | 1.00 | 0.00 |
| ATOM | 2109 | O1  | LIG | 134 | 21.354 | -19.235 | 13.469 | 1.00 | 0.00 |
| ATOM | 2110 | O2  | LIG | 134 | 19.994 | -17.177 | 13.681 | 1.00 | 0.00 |
| ATOM | 2111 | O3  | LIG | 134 | 19.215 | -19.122 | 12.197 | 1.00 | 0.00 |
| ATOM | 2112 | O4  | LIG | 134 | 19.065 | -19.308 | 14.788 | 1.00 | 0.00 |

|      |      |     |     |     |         |         |        |      |      |
|------|------|-----|-----|-----|---------|---------|--------|------|------|
| ATOM | 2113 | C1  | LIG | 134 | 21.697  | -20.638 | 13.402 | 1.00 | 0.00 |
| ATOM | 2114 | H1  | LIG | 134 | 22.784  | -20.679 | 13.399 | 1.00 | 0.00 |
| ATOM | 2115 | H2  | LIG | 134 | 21.304  | -21.074 | 12.482 | 1.00 | 0.00 |
| ATOM | 2116 | H3  | LIG | 134 | 21.305  | -21.165 | 14.273 | 1.00 | 0.00 |
| ATOM | 2117 | C2  | LIG | 134 | 20.725  | -16.435 | 12.677 | 1.00 | 0.00 |
| ATOM | 2118 | H4  | LIG | 134 | 20.327  | -16.649 | 11.684 | 1.00 | 0.00 |
| ATOM | 2119 | H5  | LIG | 134 | 21.784  | -16.691 | 12.725 | 1.00 | 0.00 |
| ATOM | 2120 | H6  | LIG | 134 | 20.578  | -15.386 | 12.922 | 1.00 | 0.00 |
| ATOM | 2121 | C3  | LIG | 134 | 17.885  | -19.415 | 12.048 | 1.00 | 0.00 |
| ATOM | 2122 | H7  | LIG | 134 | 17.328  | -19.646 | 12.948 | 1.00 | 0.00 |
| ATOM | 2123 | C4  | LIG | 134 | 17.323  | -19.437 | 10.841 | 1.00 | 0.00 |
| TER  |      |     |     |     |         |         |        |      |      |
| ATOM | 2124 | Cl1 | LIG | 135 | -30.211 | -17.289 | -6.315 | 1.00 | 0.00 |
| ATOM | 2125 | Cl2 | LIG | 135 | -29.125 | -20.020 | -6.098 | 1.00 | 0.00 |
| ATOM | 2126 | P1  | LIG | 135 | -29.638 | -19.520 | -1.548 | 1.00 | 0.00 |
| ATOM | 2127 | O1  | LIG | 135 | -30.027 | -21.004 | -1.108 | 1.00 | 0.00 |
| ATOM | 2128 | O2  | LIG | 135 | -28.091 | -19.463 | -1.209 | 1.00 | 0.00 |
| ATOM | 2129 | O3  | LIG | 135 | -29.715 | -19.667 | -3.187 | 1.00 | 0.00 |
| ATOM | 2130 | O4  | LIG | 135 | -30.427 | -18.392 | -1.034 | 1.00 | 0.00 |
| ATOM | 2131 | C1  | LIG | 135 | -31.378 | -21.501 | -1.243 | 1.00 | 0.00 |

|      |      |     |     |     |         |         |         |      |      |
|------|------|-----|-----|-----|---------|---------|---------|------|------|
| ATOM | 2132 | H1  | LIG | 135 | -31.390 | -22.470 | -0.748  | 1.00 | 0.00 |
| ATOM | 2133 | H2  | LIG | 135 | -31.628 | -21.618 | -2.298  | 1.00 | 0.00 |
| ATOM | 2134 | H3  | LIG | 135 | -32.081 | -20.824 | -0.755  | 1.00 | 0.00 |
| ATOM | 2135 | C2  | LIG | 135 | -27.142 | -20.475 | -1.619  | 1.00 | 0.00 |
| ATOM | 2136 | H4  | LIG | 135 | -27.161 | -20.593 | -2.703  | 1.00 | 0.00 |
| ATOM | 2137 | H5  | LIG | 135 | -27.375 | -21.421 | -1.129  | 1.00 | 0.00 |
| ATOM | 2138 | H6  | LIG | 135 | -26.169 | -20.112 | -1.298  | 1.00 | 0.00 |
| ATOM | 2139 | C3  | LIG | 135 | -30.007 | -18.590 | -3.982  | 1.00 | 0.00 |
| ATOM | 2140 | H7  | LIG | 135 | -30.430 | -17.720 | -3.496  | 1.00 | 0.00 |
| ATOM | 2141 | C4  | LIG | 135 | -29.799 | -18.638 | -5.297  | 1.00 | 0.00 |
| TER  |      |     |     |     |         |         |         |      |      |
| ATOM | 2142 | Cl1 | LIG | 136 | 19.674  | 6.315   | -19.134 | 1.00 | 0.00 |
| ATOM | 2143 | Cl2 | LIG | 136 | 18.384  | 8.905   | -19.691 | 1.00 | 0.00 |
| ATOM | 2144 | P1  | LIG | 136 | 20.448  | 8.687   | -23.804 | 1.00 | 0.00 |
| ATOM | 2145 | O1  | LIG | 136 | 19.360  | 9.381   | -24.742 | 1.00 | 0.00 |
| ATOM | 2146 | O2  | LIG | 136 | 21.471  | 9.869   | -23.542 | 1.00 | 0.00 |
| ATOM | 2147 | O3  | LIG | 136 | 19.587  | 8.545   | -22.406 | 1.00 | 0.00 |
| ATOM | 2148 | O4  | LIG | 136 | 21.060  | 7.423   | -24.233 | 1.00 | 0.00 |
| ATOM | 2149 | C1  | LIG | 136 | 18.214  | 8.651   | -25.237 | 1.00 | 0.00 |
| ATOM | 2150 | H1  | LIG | 136 | 17.725  | 9.312   | -25.949 | 1.00 | 0.00 |

|      |      |     |     |     |         |        |         |      |      |
|------|------|-----|-----|-----|---------|--------|---------|------|------|
| ATOM | 2151 | H2  | LIG | 136 | 17.536  | 8.420  | -24.414 | 1.00 | 0.00 |
| ATOM | 2152 | H3  | LIG | 136 | 18.536  | 7.737  | -25.736 | 1.00 | 0.00 |
| ATOM | 2153 | C2  | LIG | 136 | 21.074  | 11.193 | -23.116 | 1.00 | 0.00 |
| ATOM | 2154 | H4  | LIG | 136 | 20.506  | 11.138 | -22.186 | 1.00 | 0.00 |
| ATOM | 2155 | H5  | LIG | 136 | 20.479  | 11.671 | -23.896 | 1.00 | 0.00 |
| ATOM | 2156 | H6  | LIG | 136 | 22.000  | 11.741 | -22.958 | 1.00 | 0.00 |
| ATOM | 2157 | C3  | LIG | 136 | 19.860  | 7.550  | -21.503 | 1.00 | 0.00 |
| ATOM | 2158 | H7  | LIG | 136 | 20.472  | 6.726  | -21.849 | 1.00 | 0.00 |
| ATOM | 2159 | C4  | LIG | 136 | 19.366  | 7.598  | -20.268 | 1.00 | 0.00 |
| TER  |      |     |     |     |         |        |         |      |      |
| ATOM | 2160 | Cl1 | LIG | 137 | -30.648 | 13.136 | -29.998 | 1.00 | 0.00 |
| ATOM | 2161 | Cl2 | LIG | 137 | -28.878 | 11.265 | -28.565 | 1.00 | 0.00 |
| ATOM | 2162 | P1  | LIG | 137 | -29.440 | 14.026 | -24.921 | 1.00 | 0.00 |
| ATOM | 2163 | O1  | LIG | 137 | -29.419 | 12.975 | -23.720 | 1.00 | 0.00 |
| ATOM | 2164 | O2  | LIG | 137 | -27.958 | 14.588 | -24.904 | 1.00 | 0.00 |
| ATOM | 2165 | O3  | LIG | 137 | -29.498 | 13.002 | -26.210 | 1.00 | 0.00 |
| ATOM | 2166 | O4  | LIG | 137 | -30.491 | 15.053 | -24.954 | 1.00 | 0.00 |
| ATOM | 2167 | C1  | LIG | 137 | -30.592 | 12.208 | -23.367 | 1.00 | 0.00 |
| ATOM | 2168 | H1  | LIG | 137 | -30.341 | 11.686 | -22.446 | 1.00 | 0.00 |
| ATOM | 2169 | H2  | LIG | 137 | -30.818 | 11.488 | -24.155 | 1.00 | 0.00 |

|      |      |    |     |     |         |        |         |      |      |
|------|------|----|-----|-----|---------|--------|---------|------|------|
| ATOM | 2170 | H3 | LIG | 137 | -31.441 | 12.873 | -23.201 | 1.00 | 0.00 |
| ATOM | 2171 | C2 | LIG | 137 | -26.782 | 13.746 | -24.869 | 1.00 | 0.00 |
| ATOM | 2172 | H4 | LIG | 137 | -26.784 | 13.058 | -25.716 | 1.00 | 0.00 |
| ATOM | 2173 | H5 | LIG | 137 | -26.750 | 13.192 | -23.930 | 1.00 | 0.00 |
| ATOM | 2174 | H6 | LIG | 137 | -25.934 | 14.423 | -24.938 | 1.00 | 0.00 |
| ATOM | 2175 | C3 | LIG | 137 | -30.075 | 13.384 | -27.393 | 1.00 | 0.00 |
| ATOM | 2176 | H7 | LIG | 137 | -30.706 | 14.265 | -27.372 | 1.00 | 0.00 |
| ATOM | 2177 | C4 | LIG | 137 | -29.881 | 12.678 | -28.505 | 1.00 | 0.00 |
| TER  |      |    |     |     |         |        |         |      |      |
| END  |      |    |     |     |         |        |         |      |      |

**Table B:** The number of atoms present in the system of AH-Nap

|      |   |     |     |   |        |         |        |      |      |
|------|---|-----|-----|---|--------|---------|--------|------|------|
| ATOM | 1 | N   | GLY | 1 | 24.719 | -9.990  | -2.261 | 1.00 | 0.00 |
| ATOM | 2 | H1  | GLY | 1 | 24.018 | -9.275  | -2.385 | 1.00 | 0.00 |
| ATOM | 3 | H2  | GLY | 1 | 24.334 | -10.877 | -2.553 | 1.00 | 0.00 |
| ATOM | 4 | H3  | GLY | 1 | 25.590 | -9.664  | -2.656 | 1.00 | 0.00 |
| ATOM | 5 | CA  | GLY | 1 | 24.979 | -10.135 | -0.801 | 1.00 | 0.00 |
| ATOM | 6 | HA2 | GLY | 1 | 24.747 | -11.151 | -0.480 | 1.00 | 0.00 |
| ATOM | 7 | HA3 | GLY | 1 | 26.025 | -9.917  | -0.585 | 1.00 | 0.00 |
| ATOM | 8 | C   | GLY | 1 | 24.095 | -9.154  | -0.027 | 1.00 | 0.00 |
| ATOM | 9 | O   | GLY | 1 | 24.566 | -8.165  | 0.500  | 1.00 | 0.00 |

|      |    |     |     |   |        |         |        |      |      |
|------|----|-----|-----|---|--------|---------|--------|------|------|
| ATOM | 10 | N   | PRO | 2 | 22.788 | -9.439  | 0.039  | 1.00 | 0.00 |
| ATOM | 11 | CD  | PRO | 2 | 22.145 | -10.615 | -0.573 | 1.00 | 0.00 |
| ATOM | 12 | HD2 | PRO | 2 | 22.706 | -11.513 | -0.312 | 1.00 | 0.00 |
| ATOM | 13 | HD3 | PRO | 2 | 22.131 | -10.499 | -1.657 | 1.00 | 0.00 |
| ATOM | 14 | CG  | PRO | 2 | 20.766 | -10.602 | 0.022  | 1.00 | 0.00 |
| ATOM | 15 | HG2 | PRO | 2 | 20.750 | -11.236 | 0.909  | 1.00 | 0.00 |
| ATOM | 16 | HG3 | PRO | 2 | 20.054 | -10.984 | -0.709 | 1.00 | 0.00 |
| ATOM | 17 | CB  | PRO | 2 | 20.470 | -9.181  | 0.362  | 1.00 | 0.00 |
| ATOM | 18 | HB2 | PRO | 2 | 19.801 | -9.167  | 1.222  | 1.00 | 0.00 |
| ATOM | 19 | HB3 | PRO | 2 | 20.029 | -8.604  | -0.451 | 1.00 | 0.00 |
| ATOM | 20 | CA  | PRO | 2 | 21.824 | -8.587  | 0.748  | 1.00 | 0.00 |
| ATOM | 21 | HA  | PRO | 2 | 21.963 | -7.560  | 0.412  | 1.00 | 0.00 |
| ATOM | 22 | C   | PRO | 2 | 22.013 | -8.657  | 2.266  | 1.00 | 0.00 |
| ATOM | 23 | O   | PRO | 2 | 21.568 | -7.794  | 2.997  | 1.00 | 0.00 |
| ATOM | 24 | N   | MET | 3 | 22.669 | -9.678  | 2.745  | 1.00 | 0.00 |
| ATOM | 25 | H   | MET | 3 | 23.042 | -10.400 | 2.144  | 1.00 | 0.00 |
| ATOM | 26 | CA  | MET | 3 | 22.884 | -9.801  | 4.215  | 1.00 | 0.00 |
| ATOM | 27 | HA  | MET | 3 | 21.928 | -9.889  | 4.731  | 1.00 | 0.00 |
| ATOM | 28 | CB  | MET | 3 | 23.713 | -11.054 | 4.505  | 1.00 | 0.00 |
| ATOM | 29 | HB2 | MET | 3 | 24.646 | -11.012 | 3.942  | 1.00 | 0.00 |
| ATOM | 30 | HB3 | MET | 3 | 23.935 | -11.106 | 5.571  | 1.00 | 0.00 |
| ATOM | 31 | CG  | MET | 3 | 22.922 | -12.296 | 4.088  | 1.00 | 0.00 |

|      |    |         |   |        |         |       |      |      |
|------|----|---------|---|--------|---------|-------|------|------|
| ATOM | 32 | HG2 MET | 3 | 22.735 | -12.271 | 3.014 | 1.00 | 0.00 |
| ATOM | 33 | HG3 MET | 3 | 23.488 | -13.194 | 4.337 | 1.00 | 0.00 |
| ATOM | 34 | SD MET  | 3 | 21.340 | -12.327 | 4.967 | 1.00 | 0.00 |
| ATOM | 35 | CE MET  | 3 | 22.014 | -12.405 | 6.645 | 1.00 | 0.00 |
| ATOM | 36 | HE1 MET | 3 | 22.631 | -11.526 | 6.831 | 1.00 | 0.00 |
| ATOM | 37 | HE2 MET | 3 | 21.196 | -12.433 | 7.365 | 1.00 | 0.00 |
| ATOM | 38 | HE3 MET | 3 | 22.622 | -13.304 | 6.752 | 1.00 | 0.00 |
| ATOM | 39 | C MET   | 3 | 23.628 | -8.566  | 4.726 | 1.00 | 0.00 |
| ATOM | 40 | O MET   | 3 | 23.382 | -8.088  | 5.816 | 1.00 | 0.00 |
| ATOM | 41 | N ARG   | 4 | 24.538 | -8.045  | 3.948 | 1.00 | 0.00 |
| ATOM | 42 | H ARG   | 4 | 24.750 | -8.438  | 3.042 | 1.00 | 0.00 |
| ATOM | 43 | CA ARG  | 4 | 25.295 | -6.841  | 4.390 | 1.00 | 0.00 |
| ATOM | 44 | HA ARG  | 4 | 25.879 | -7.069  | 5.282 | 1.00 | 0.00 |
| ATOM | 45 | CB ARG  | 4 | 26.250 | -6.401  | 3.279 | 1.00 | 0.00 |
| ATOM | 46 | HB2 ARG | 4 | 25.687 | -6.234  | 2.361 | 1.00 | 0.00 |
| ATOM | 47 | HB3 ARG | 4 | 26.748 | -5.477  | 3.573 | 1.00 | 0.00 |
| ATOM | 48 | CG ARG  | 4 | 27.297 | -7.491  | 3.043 | 1.00 | 0.00 |
| ATOM | 49 | HG2 ARG | 4 | 27.802 | -7.720  | 3.981 | 1.00 | 0.00 |
| ATOM | 50 | HG3 ARG | 4 | 26.809 | -8.390  | 2.666 | 1.00 | 0.00 |
| ATOM | 51 | CD ARG  | 4 | 28.322 | -7.000  | 2.019 | 1.00 | 0.00 |
| ATOM | 52 | HD2 ARG | 4 | 28.844 | -6.122  | 2.399 | 1.00 | 0.00 |
| ATOM | 53 | HD3 ARG | 4 | 29.045 | -7.787  | 1.802 | 1.00 | 0.00 |



|      |    |      |     |   |        |        |        |      |      |
|------|----|------|-----|---|--------|--------|--------|------|------|
| ATOM | 54 | NE   | ARG | 4 | 27.625 | -6.631 | 0.756  | 1.00 | 0.00 |
| ATOM | 55 | HE   | ARG | 4 | 27.278 | -7.336 | 0.121  | 1.00 | 0.00 |
| ATOM | 56 | CZ   | ARG | 4 | 27.451 | -5.374 | 0.448  | 1.00 | 0.00 |
| ATOM | 57 | NH1  | ARG | 4 | 28.450 | -4.538 | 0.532  | 1.00 | 0.00 |
| ATOM | 58 | HH11 | ARG | 4 | 29.356 | -4.867 | 0.835  | 1.00 | 0.00 |
| ATOM | 59 | HH12 | ARG | 4 | 28.313 | -3.567 | 0.293  | 1.00 | 0.00 |
| ATOM | 60 | NH2  | ARG | 4 | 26.280 | -4.953 | 0.057  | 1.00 | 0.00 |
| ATOM | 61 | HH21 | ARG | 4 | 25.509 | -5.603 | -0.007 | 1.00 | 0.00 |
| ATOM | 62 | HH22 | ARG | 4 | 26.150 | -3.980 | -0.180 | 1.00 | 0.00 |
| ATOM | 63 | C    | ARG | 4 | 24.316 | -5.707 | 4.698  | 1.00 | 0.00 |
| ATOM | 64 | O    | ARG | 4 | 24.511 | -4.937 | 5.617  | 1.00 | 0.00 |
| ATOM | 65 | N    | ARG | 5 | 23.262 | -5.598 | 3.935  | 1.00 | 0.00 |
| ATOM | 66 | H    | ARG | 5 | 23.094 | -6.234 | 3.168  | 1.00 | 0.00 |
| ATOM | 67 | CA   | ARG | 5 | 22.271 | -4.514 | 4.185  | 1.00 | 0.00 |
| ATOM | 68 | HA   | ARG | 5 | 22.743 | -3.538 | 4.078  | 1.00 | 0.00 |
| ATOM | 69 | CB   | ARG | 5 | 21.132 | -4.621 | 3.168  | 1.00 | 0.00 |
| ATOM | 70 | HB2  | ARG | 5 | 20.680 | -5.611 | 3.231  | 1.00 | 0.00 |
| ATOM | 71 | HB3  | ARG | 5 | 20.379 | -3.863 | 3.384  | 1.00 | 0.00 |
| ATOM | 72 | CG   | ARG | 5 | 21.685 | -4.403 | 1.758  | 1.00 | 0.00 |
| ATOM | 73 | HG2  | ARG | 5 | 22.197 | -3.442 | 1.712  | 1.00 | 0.00 |
| ATOM | 74 | HG3  | ARG | 5 | 22.388 | -5.201 | 1.515  | 1.00 | 0.00 |
| ATOM | 75 | CD   | ARG | 5 | 20.533 | -4.415 | 0.752  | 1.00 | 0.00 |

|      |    |          |   |        |        |        |      |      |
|------|----|----------|---|--------|--------|--------|------|------|
| ATOM | 76 | HD2 ARG  | 5 | 19.935 | -5.318 | 0.874  | 1.00 | 0.00 |
| ATOM | 77 | HD3 ARG  | 5 | 19.901 | -3.539 | 0.892  | 1.00 | 0.00 |
| ATOM | 78 | NE ARG   | 5 | 21.083 | -4.391 | -0.633 | 1.00 | 0.00 |
| ATOM | 79 | HE ARG   | 5 | 21.610 | -3.602 | -0.978 | 1.00 | 0.00 |
| ATOM | 80 | CZ ARG   | 5 | 20.888 | -5.406 | -1.430 | 1.00 | 0.00 |
| ATOM | 81 | NH1 ARG  | 5 | 19.687 | -5.893 | -1.586 | 1.00 | 0.00 |
| ATOM | 82 | HH11 ARG | 5 | 18.910 | -5.482 | -1.088 | 1.00 | 0.00 |
| ATOM | 83 | HH12 ARG | 5 | 19.540 | -6.679 | -2.204 | 1.00 | 0.00 |
| ATOM | 84 | NH2 ARG  | 5 | 21.894 | -5.934 | -2.071 | 1.00 | 0.00 |
| ATOM | 85 | HH21 ARG | 5 | 22.822 | -5.555 | -1.948 | 1.00 | 0.00 |
| ATOM | 86 | HH22 ARG | 5 | 21.740 | -6.720 | -2.687 | 1.00 | 0.00 |
| ATOM | 87 | C ARG    | 5 | 21.707 | -4.652 | 5.600  | 1.00 | 0.00 |
| ATOM | 88 | O ARG    | 5 | 21.355 | -3.678 | 6.235  | 1.00 | 0.00 |
| ATOM | 89 | N GLU    | 6 | 21.617 | -5.855 | 6.098  | 1.00 | 0.00 |
| ATOM | 90 | H GLU    | 6 | 21.907 | -6.670 | 5.575  | 1.00 | 0.00 |
| ATOM | 91 | CA GLU   | 6 | 21.075 | -6.053 | 7.472  | 1.00 | 0.00 |
| ATOM | 92 | HA GLU   | 6 | 20.051 | -5.685 | 7.531  | 1.00 | 0.00 |
| ATOM | 93 | CB GLU   | 6 | 21.079 | -7.545 | 7.813  | 1.00 | 0.00 |
| ATOM | 94 | HB2 GLU  | 6 | 22.090 | -7.940 | 7.708  | 1.00 | 0.00 |
| ATOM | 95 | HB3 GLU  | 6 | 20.740 | -7.685 | 8.840  | 1.00 | 0.00 |
| ATOM | 96 | CG GLU   | 6 | 20.140 | -8.288 | 6.861  | 1.00 | 0.00 |
| ATOM | 97 | HG2 GLU  | 6 | 19.135 | -7.875 | 6.942  | 1.00 | 0.00 |

|      |     |     |     |   |        |         |        |      |      |
|------|-----|-----|-----|---|--------|---------|--------|------|------|
| ATOM | 98  | HG3 | GLU | 6 | 20.497 | -8.175  | 5.837  | 1.00 | 0.00 |
| ATOM | 99  | CD  | GLU | 6 | 20.112 | -9.772  | 7.229  | 1.00 | 0.00 |
| ATOM | 100 | OE1 | GLU | 6 | 20.910 | -10.173 | 8.060  | 1.00 | 0.00 |
| ATOM | 101 | OE2 | GLU | 6 | 19.290 | -10.484 | 6.674  | 1.00 | 0.00 |
| ATOM | 102 | C   | GLU | 6 | 21.947 | -5.297  | 8.477  | 1.00 | 0.00 |
| ATOM | 103 | O   | GLU | 6 | 21.472 | -4.820  | 9.489  | 1.00 | 0.00 |
| ATOM | 104 | N   | ARG | 7 | 23.218 | -5.183  | 8.207  | 1.00 | 0.00 |
| ATOM | 105 | H   | ARG | 7 | 23.620 | -5.578  | 7.368  | 1.00 | 0.00 |
| ATOM | 106 | CA  | ARG | 7 | 24.117 | -4.457  | 9.147  | 1.00 | 0.00 |
| ATOM | 107 | HA  | ARG | 7 | 24.219 | -5.014  | 10.078 | 1.00 | 0.00 |
| ATOM | 108 | CB  | ARG | 7 | 25.502 | -4.304  | 8.515  | 1.00 | 0.00 |
| ATOM | 109 | HB2 | ARG | 7 | 25.873 | -5.283  | 8.211  | 1.00 | 0.00 |
| ATOM | 110 | HB3 | ARG | 7 | 25.434 | -3.655  | 7.642  | 1.00 | 0.00 |
| ATOM | 111 | CG  | ARG | 7 | 26.463 | -3.689  | 9.534  | 1.00 | 0.00 |
| ATOM | 112 | HG2 | ARG | 7 | 26.075 | -2.726  | 9.865  | 1.00 | 0.00 |
| ATOM | 113 | HG3 | ARG | 7 | 26.560 | -4.356  | 10.391 | 1.00 | 0.00 |
| ATOM | 114 | CD  | ARG | 7 | 27.835 | -3.490  | 8.886  | 1.00 | 0.00 |
| ATOM | 115 | HD2 | ARG | 7 | 28.197 | -4.431  | 8.471  | 1.00 | 0.00 |
| ATOM | 116 | HD3 | ARG | 7 | 27.774 | -2.744  | 8.094  | 1.00 | 0.00 |
| ATOM | 117 | NE  | ARG | 7 | 28.805 | -3.017  | 9.914  | 1.00 | 0.00 |
| ATOM | 118 | HE  | ARG | 7 | 29.233 | -3.656  | 10.570 | 1.00 | 0.00 |
| ATOM | 119 | CZ  | ARG | 7 | 29.119 | -1.752  | 9.981  | 1.00 | 0.00 |

|      |     |      |     |   |        |        |        |      |      |
|------|-----|------|-----|---|--------|--------|--------|------|------|
| ATOM | 120 | NH1  | ARG | 7 | 28.528 | -0.979 | 10.850 | 1.00 | 0.00 |
| ATOM | 121 | HH11 | ARG | 7 | 27.829 | -1.363 | 11.469 | 1.00 | 0.00 |
| ATOM | 122 | HH12 | ARG | 7 | 28.773 | -0.001 | 10.900 | 1.00 | 0.00 |
| ATOM | 123 | NH2  | ARG | 7 | 30.024 | -1.261 | 9.179  | 1.00 | 0.00 |
| ATOM | 124 | HH21 | ARG | 7 | 30.480 | -1.863 | 8.508  | 1.00 | 0.00 |
| ATOM | 125 | HH22 | ARG | 7 | 30.265 | -0.282 | 9.233  | 1.00 | 0.00 |
| ATOM | 126 | C    | ARG | 7 | 23.536 | -3.073 | 9.442  | 1.00 | 0.00 |
| ATOM | 127 | O    | ARG | 7 | 23.557 | -2.604 | 10.563 | 1.00 | 0.00 |
| ATOM | 128 | N    | GLY | 8 | 23.015 | -2.414 | 8.443  | 1.00 | 0.00 |
| ATOM | 129 | H    | GLY | 8 | 22.993 | -2.797 | 7.509  | 1.00 | 0.00 |
| ATOM | 130 | CA   | GLY | 8 | 22.433 | -1.060 | 8.666  | 1.00 | 0.00 |
| ATOM | 131 | HA2  | GLY | 8 | 23.209 | -0.372 | 9.000  | 1.00 | 0.00 |
| ATOM | 132 | HA3  | GLY | 8 | 21.991 | -0.688 | 7.742  | 1.00 | 0.00 |
| ATOM | 133 | C    | GLY | 8 | 21.346 | -1.144 | 9.739  | 1.00 | 0.00 |
| ATOM | 134 | O    | GLY | 8 | 21.132 | -0.215 | 10.492 | 1.00 | 0.00 |
| ATOM | 135 | N    | ARG | 9 | 20.655 | -2.249 | 9.814  | 1.00 | 0.00 |
| ATOM | 136 | H    | ARG | 9 | 20.825 | -3.025 | 9.190  | 1.00 | 0.00 |
| ATOM | 137 | CA   | ARG | 9 | 19.583 | -2.389 | 10.840 | 1.00 | 0.00 |
| ATOM | 138 | HA   | ARG | 9 | 18.783 | -1.674 | 10.651 | 1.00 | 0.00 |
| ATOM | 139 | CB   | ARG | 9 | 19.001 | -3.802 | 10.779 | 1.00 | 0.00 |
| ATOM | 140 | HB2  | ARG | 9 | 18.638 | -4.004 | 9.771  | 1.00 | 0.00 |
| ATOM | 141 | HB3  | ARG | 9 | 19.774 | -4.526 | 11.037 | 1.00 | 0.00 |

|      |     |      |     |    |        |        |        |      |      |
|------|-----|------|-----|----|--------|--------|--------|------|------|
| ATOM | 142 | CG   | ARG | 9  | 17.842 | -3.918 | 11.772 | 1.00 | 0.00 |
| ATOM | 143 | HG2  | ARG | 9  | 18.197 | -3.680 | 12.775 | 1.00 | 0.00 |
| ATOM | 144 | HG3  | ARG | 9  | 17.052 | -3.222 | 11.491 | 1.00 | 0.00 |
| ATOM | 145 | CD   | ARG | 9  | 17.294 | -5.347 | 11.752 | 1.00 | 0.00 |
| ATOM | 146 | HD2  | ARG | 9  | 17.011 | -5.629 | 10.738 | 1.00 | 0.00 |
| ATOM | 147 | HD3  | ARG | 9  | 18.044 | -6.045 | 12.126 | 1.00 | 0.00 |
| ATOM | 148 | NE   | ARG | 9  | 16.089 | -5.429 | 12.625 | 1.00 | 0.00 |
| ATOM | 149 | HE   | ARG | 9  | 15.236 | -4.941 | 12.395 | 1.00 | 0.00 |
| ATOM | 150 | CZ   | ARG | 9  | 16.122 | -6.145 | 13.715 | 1.00 | 0.00 |
| ATOM | 151 | NH1  | ARG | 9  | 16.596 | -7.360 | 13.685 | 1.00 | 0.00 |
| ATOM | 152 | HH11 | ARG | 9  | 16.937 | -7.745 | 12.815 | 1.00 | 0.00 |
| ATOM | 153 | HH12 | ARG | 9  | 16.620 | -7.911 | 14.531 | 1.00 | 0.00 |
| ATOM | 154 | NH2  | ARG | 9  | 15.681 | -5.644 | 14.837 | 1.00 | 0.00 |
| ATOM | 155 | HH21 | ARG | 9  | 15.316 | -4.703 | 14.857 | 1.00 | 0.00 |
| ATOM | 156 | HH22 | ARG | 9  | 15.708 | -6.200 | 15.680 | 1.00 | 0.00 |
| ATOM | 157 | C    | ARG | 9  | 20.173 | -2.138 | 12.229 | 1.00 | 0.00 |
| ATOM | 158 | O    | ARG | 9  | 19.524 | -1.593 | 13.100 | 1.00 | 0.00 |
| ATOM | 159 | N    | GLN | 10 | 21.399 | -2.533 | 12.444 | 1.00 | 0.00 |
| ATOM | 160 | H    | GLN | 10 | 21.945 | -2.987 | 11.725 | 1.00 | 0.00 |
| ATOM | 161 | CA   | GLN | 10 | 22.028 | -2.317 | 13.777 | 1.00 | 0.00 |
| ATOM | 162 | HA   | GLN | 10 | 21.513 | -2.903 | 14.539 | 1.00 | 0.00 |
| ATOM | 163 | CB   | GLN | 10 | 23.491 | -2.761 | 13.726 | 1.00 | 0.00 |

|      |     |      |     |    |        |        |        |      |      |
|------|-----|------|-----|----|--------|--------|--------|------|------|
| ATOM | 164 | HB2  | GLN | 10 | 23.998 | -2.251 | 12.907 | 1.00 | 0.00 |
| ATOM | 165 | HB3  | GLN | 10 | 23.981 | -2.511 | 14.667 | 1.00 | 0.00 |
| ATOM | 166 | CG   | GLN | 10 | 23.558 | -4.274 | 13.504 | 1.00 | 0.00 |
| ATOM | 167 | HG2  | GLN | 10 | 22.978 | -4.794 | 14.267 | 1.00 | 0.00 |
| ATOM | 168 | HG3  | GLN | 10 | 23.171 | -4.530 | 12.517 | 1.00 | 0.00 |
| ATOM | 169 | CD   | GLN | 10 | 25.012 | -4.739 | 13.594 | 1.00 | 0.00 |
| ATOM | 170 | OE1  | GLN | 10 | 25.673 | -4.991 | 12.497 | 1.00 | 0.00 |
| ATOM | 171 | NE2  | GLN | 10 | 25.553 | -4.875 | 14.673 | 1.00 | 0.00 |
| ATOM | 172 | HE21 | GLN | 10 | 26.514 | -5.183 | 14.717 | 1.00 | 0.00 |
| ATOM | 173 | HE22 | GLN | 10 | 25.039 | -4.680 | 15.520 | 1.00 | 0.00 |
| ATOM | 174 | C    | GLN | 10 | 21.958 | -0.832 | 14.139 | 1.00 | 0.00 |
| ATOM | 175 | O    | GLN | 10 | 21.800 | -0.471 | 15.288 | 1.00 | 0.00 |
| ATOM | 176 | N    | GLY | 11 | 22.075 | 0.031  | 13.168 | 1.00 | 0.00 |
| ATOM | 177 | H    | GLY | 11 | 22.207 | -0.263 | 12.211 | 1.00 | 0.00 |
| ATOM | 178 | CA   | GLY | 11 | 22.016 | 1.492  | 13.457 | 1.00 | 0.00 |
| ATOM | 179 | HA2  | GLY | 11 | 22.886 | 1.791  | 14.042 | 1.00 | 0.00 |
| ATOM | 180 | HA3  | GLY | 11 | 21.994 | 2.055  | 12.524 | 1.00 | 0.00 |
| ATOM | 181 | C    | GLY | 11 | 20.748 | 1.802  | 14.256 | 1.00 | 0.00 |
| ATOM | 182 | O    | GLY | 11 | 20.741 | 2.657  | 15.118 | 1.00 | 0.00 |
| ATOM | 183 | N    | ASP | 12 | 19.676 | 1.113  | 13.975 | 1.00 | 0.00 |
| ATOM | 184 | H    | ASP | 12 | 19.674 | 0.401  | 13.258 | 1.00 | 0.00 |
| ATOM | 185 | CA   | ASP | 12 | 18.411 | 1.370  | 14.720 | 1.00 | 0.00 |

|      |     |     |     |    |        |        |        |      |      |
|------|-----|-----|-----|----|--------|--------|--------|------|------|
| ATOM | 186 | HA  | ASP | 12 | 17.601 | 0.767  | 14.308 | 1.00 | 0.00 |
| ATOM | 187 | CB  | ASP | 12 | 18.599 | 0.996  | 16.191 | 1.00 | 0.00 |
| ATOM | 188 | HB2 | ASP | 12 | 19.452 | 1.539  | 16.599 | 1.00 | 0.00 |
| ATOM | 189 | HB3 | ASP | 12 | 17.701 | 1.257  | 16.750 | 1.00 | 0.00 |
| ATOM | 190 | CG  | ASP | 12 | 18.851 | -0.509 | 16.306 | 1.00 | 0.00 |
| ATOM | 191 | OD1 | ASP | 12 | 18.613 | -1.205 | 15.333 | 1.00 | 0.00 |
| ATOM | 192 | OD2 | ASP | 12 | 19.278 | -0.939 | 17.365 | 1.00 | 0.00 |
| ATOM | 193 | C   | ASP | 12 | 18.047 | 2.852  | 14.613 | 1.00 | 0.00 |
| ATOM | 194 | O   | ASP | 12 | 17.729 | 3.495  | 15.593 | 1.00 | 0.00 |
| ATOM | 195 | N   | SER | 13 | 18.092 | 3.400  | 13.429 | 1.00 | 0.00 |
| ATOM | 196 | H   | SER | 13 | 18.356 | 2.872  | 12.609 | 1.00 | 0.00 |
| ATOM | 197 | CA  | SER | 13 | 17.748 | 4.840  | 13.262 | 1.00 | 0.00 |
| ATOM | 198 | HA  | SER | 13 | 18.461 | 5.464  | 13.801 | 1.00 | 0.00 |
| ATOM | 199 | CB  | SER | 13 | 17.801 | 5.208  | 11.778 | 1.00 | 0.00 |
| ATOM | 200 | HB2 | SER | 13 | 17.039 | 4.647  | 11.236 | 1.00 | 0.00 |
| ATOM | 201 | HB3 | SER | 13 | 17.618 | 6.276  | 11.661 | 1.00 | 0.00 |
| ATOM | 202 | OG  | SER | 13 | 19.083 | 4.888  | 11.257 | 1.00 | 0.00 |
| ATOM | 203 | HG  | SER | 13 | 19.117 | 5.118  | 10.326 | 1.00 | 0.00 |
| ATOM | 204 | C   | SER | 13 | 16.338 | 5.091  | 13.800 | 1.00 | 0.00 |
| ATOM | 205 | O   | SER | 13 | 16.065 | 6.112  | 14.400 | 1.00 | 0.00 |
| ATOM | 206 | N   | SER | 14 | 15.441 | 4.167  | 13.590 | 1.00 | 0.00 |
| ATOM | 207 | H   | SER | 14 | 15.663 | 3.315  | 13.093 | 1.00 | 0.00 |

|      |     |     |     |    |        |       |        |      |      |
|------|-----|-----|-----|----|--------|-------|--------|------|------|
| ATOM | 208 | CA  | SER | 14 | 14.048 | 4.352 | 14.090 | 1.00 | 0.00 |
| ATOM | 209 | HA  | SER | 14 | 14.051 | 4.934 | 15.011 | 1.00 | 0.00 |
| ATOM | 210 | CB  | SER | 14 | 13.225 | 5.101 | 13.040 | 1.00 | 0.00 |
| ATOM | 211 | HB2 | SER | 14 | 13.642 | 6.097 | 12.894 | 1.00 | 0.00 |
| ATOM | 212 | HB3 | SER | 14 | 13.253 | 4.554 | 12.097 | 1.00 | 0.00 |
| ATOM | 213 | OG  | SER | 14 | 11.880 | 5.211 | 13.484 | 1.00 | 0.00 |
| ATOM | 214 | HG  | SER | 14 | 11.363 | 5.680 | 12.825 | 1.00 | 0.00 |
| ATOM | 215 | C   | SER | 14 | 13.418 | 2.982 | 14.350 | 1.00 | 0.00 |
| ATOM | 216 | O   | SER | 14 | 13.507 | 2.082 | 13.540 | 1.00 | 0.00 |
| ATOM | 217 | N   | SER | 15 | 12.782 | 2.817 | 15.479 | 1.00 | 0.00 |
| ATOM | 218 | H   | SER | 15 | 12.705 | 3.559 | 16.160 | 1.00 | 0.00 |
| ATOM | 219 | CA  | SER | 15 | 12.149 | 1.505 | 15.790 | 1.00 | 0.00 |
| ATOM | 220 | HA  | SER | 15 | 12.833 | 0.689 | 15.555 | 1.00 | 0.00 |
| ATOM | 221 | CB  | SER | 15 | 11.809 | 1.444 | 17.281 | 1.00 | 0.00 |
| ATOM | 222 | HB2 | SER | 15 | 11.472 | 0.439 | 17.537 | 1.00 | 0.00 |
| ATOM | 223 | HB3 | SER | 15 | 12.695 | 1.689 | 17.867 | 1.00 | 0.00 |
| ATOM | 224 | OG  | SER | 15 | 10.778 | 2.377 | 17.569 | 1.00 | 0.00 |
| ATOM | 225 | HG  | SER | 15 | 10.565 | 2.339 | 18.504 | 1.00 | 0.00 |
| ATOM | 226 | C   | SER | 15 | 10.869 | 1.344 | 14.967 | 1.00 | 0.00 |
| ATOM | 227 | O   | SER | 15 | 10.449 | 0.245 | 14.665 | 1.00 | 0.00 |
| ATOM | 228 | N   | CYX | 16 | 10.246 | 2.432 | 14.600 | 1.00 | 0.00 |
| ATOM | 229 | H   | CYX | 16 | 10.588 | 3.349 | 14.847 | 1.00 | 0.00 |



|      |     |     |     |    |        |        |        |      |      |
|------|-----|-----|-----|----|--------|--------|--------|------|------|
| ATOM | 230 | CA  | CYX | 16 | 8.996  | 2.337  | 13.794 | 1.00 | 0.00 |
| ATOM | 231 | HA  | CYX | 16 | 8.235  | 1.781  | 14.342 | 1.00 | 0.00 |
| ATOM | 232 | CB  | CYX | 16 | 8.464  | 3.742  | 13.507 | 1.00 | 0.00 |
| ATOM | 233 | HB2 | CYX | 16 | 8.487  | 4.333  | 14.422 | 1.00 | 0.00 |
| ATOM | 234 | HB3 | CYX | 16 | 9.087  | 4.219  | 12.751 | 1.00 | 0.00 |
| ATOM | 235 | SG  | CYX | 16 | 6.741  | 3.636  | 12.960 | 1.00 | 0.00 |
| ATOM | 236 | C   | CYX | 16 | 9.297  | 1.626  | 12.473 | 1.00 | 0.00 |
| ATOM | 237 | O   | CYX | 16 | 8.427  | 1.040  | 11.860 | 1.00 | 0.00 |
| ATOM | 238 | N   | GLU | 17 | 10.523 | 1.673  | 12.030 | 1.00 | 0.00 |
| ATOM | 239 | H   | GLU | 17 | 11.251 | 2.158  | 12.534 | 1.00 | 0.00 |
| ATOM | 240 | CA  | GLU | 17 | 10.879 | 1.000  | 10.750 | 1.00 | 0.00 |
| ATOM | 241 | HA  | GLU | 17 | 10.279 | 1.399  | 9.932  | 1.00 | 0.00 |
| ATOM | 242 | CB  | GLU | 17 | 12.356 | 1.248  | 10.439 | 1.00 | 0.00 |
| ATOM | 243 | HB2 | GLU | 17 | 12.947 | 1.115  | 11.346 | 1.00 | 0.00 |
| ATOM | 244 | HB3 | GLU | 17 | 12.692 | 0.541  | 9.680  | 1.00 | 0.00 |
| ATOM | 245 | CG  | GLU | 17 | 12.534 | 2.677  | 9.919  | 1.00 | 0.00 |
| ATOM | 246 | HG2 | GLU | 17 | 11.908 | 2.824  | 9.039  | 1.00 | 0.00 |
| ATOM | 247 | HG3 | GLU | 17 | 12.243 | 3.385  | 10.694 | 1.00 | 0.00 |
| ATOM | 248 | CD  | GLU | 17 | 14.000 | 2.904  | 9.545  | 1.00 | 0.00 |
| ATOM | 249 | OE1 | GLU | 17 | 14.771 | 1.966  | 9.653  | 1.00 | 0.00 |
| ATOM | 250 | OE2 | GLU | 17 | 14.326 | 4.014  | 9.157  | 1.00 | 0.00 |
| ATOM | 251 | C   | GLU | 17 | 10.629 | -0.504 | 10.879 | 1.00 | 0.00 |

|      |     |      |     |    |        |        |        |      |      |
|------|-----|------|-----|----|--------|--------|--------|------|------|
| ATOM | 252 | O    | GLU | 17 | 10.013 | -1.115 | 10.028 | 1.00 | 0.00 |
| ATOM | 253 | N    | ARG | 18 | 11.102 | -1.106 | 11.936 | 1.00 | 0.00 |
| ATOM | 254 | H    | ARG | 18 | 11.614 | -0.605 | 12.648 | 1.00 | 0.00 |
| ATOM | 255 | CA   | ARG | 18 | 10.891 | -2.571 | 12.117 | 1.00 | 0.00 |
| ATOM | 256 | HA   | ARG | 18 | 11.472 | -3.130 | 11.383 | 1.00 | 0.00 |
| ATOM | 257 | CB   | ARG | 18 | 11.347 | -2.984 | 13.518 | 1.00 | 0.00 |
| ATOM | 258 | HB2  | ARG | 18 | 12.402 | -2.740 | 13.645 | 1.00 | 0.00 |
| ATOM | 259 | HB3  | ARG | 18 | 10.759 | -2.451 | 14.265 | 1.00 | 0.00 |
| ATOM | 260 | CG   | ARG | 18 | 11.149 | -4.491 | 13.694 | 1.00 | 0.00 |
| ATOM | 261 | HG2  | ARG | 18 | 10.101 | -4.742 | 13.533 | 1.00 | 0.00 |
| ATOM | 262 | HG3  | ARG | 18 | 11.765 | -5.026 | 12.971 | 1.00 | 0.00 |
| ATOM | 263 | CD   | ARG | 18 | 11.558 | -4.897 | 15.112 | 1.00 | 0.00 |
| ATOM | 264 | HD2  | ARG | 18 | 11.629 | -5.982 | 15.188 | 1.00 | 0.00 |
| ATOM | 265 | HD3  | ARG | 18 | 12.519 | -4.452 | 15.369 | 1.00 | 0.00 |
| ATOM | 266 | NE   | ARG | 18 | 10.534 | -4.416 | 16.082 | 1.00 | 0.00 |
| ATOM | 267 | HE   | ARG | 18 | 9.776  | -3.815 | 15.793 | 1.00 | 0.00 |
| ATOM | 268 | CZ   | ARG | 18 | 10.606 | -4.769 | 17.337 | 1.00 | 0.00 |
| ATOM | 269 | NH1  | ARG | 18 | 11.106 | -3.947 | 18.219 | 1.00 | 0.00 |
| ATOM | 270 | HH11 | ARG | 18 | 11.437 | -3.039 | 17.927 | 1.00 | 0.00 |
| ATOM | 271 | HH12 | ARG | 18 | 11.160 | -4.224 | 19.189 | 1.00 | 0.00 |
| ATOM | 272 | NH2  | ARG | 18 | 10.179 | -5.945 | 17.708 | 1.00 | 0.00 |
| ATOM | 273 | HH21 | ARG | 18 | 9.794  | -6.579 | 17.022 | 1.00 | 0.00 |

|      |     |      |     |    |        |        |        |      |      |
|------|-----|------|-----|----|--------|--------|--------|------|------|
| ATOM | 274 | HH22 | ARG | 18 | 10.236 | -6.217 | 18.679 | 1.00 | 0.00 |
| ATOM | 275 | C    | ARG | 18 | 9.405  | -2.896 | 11.949 | 1.00 | 0.00 |
| ATOM | 276 | O    | ARG | 18 | 9.033  | -4.022 | 11.682 | 1.00 | 0.00 |
| ATOM | 277 | N    | GLN | 19 | 8.552  | -1.921 | 12.106 | 1.00 | 0.00 |
| ATOM | 278 | H    | GLN | 19 | 8.853  | -0.984 | 12.330 | 1.00 | 0.00 |
| ATOM | 279 | CA   | GLN | 19 | 7.093  | -2.178 | 11.958 | 1.00 | 0.00 |
| ATOM | 280 | HA   | GLN | 19 | 6.821  | -3.110 | 12.454 | 1.00 | 0.00 |
| ATOM | 281 | CB   | GLN | 19 | 6.306  | -1.034 | 12.600 | 1.00 | 0.00 |
| ATOM | 282 | HB2  | GLN | 19 | 6.703  | -0.080 | 12.254 | 1.00 | 0.00 |
| ATOM | 283 | HB3  | GLN | 19 | 5.256  | -1.114 | 12.321 | 1.00 | 0.00 |
| ATOM | 284 | CG   | GLN | 19 | 6.437  | -1.118 | 14.122 | 1.00 | 0.00 |
| ATOM | 285 | HG2  | GLN | 19 | 6.178  | -2.119 | 14.468 | 1.00 | 0.00 |
| ATOM | 286 | HG3  | GLN | 19 | 7.456  | -0.881 | 14.428 | 1.00 | 0.00 |
| ATOM | 287 | CD   | GLN | 19 | 5.485  | -0.114 | 14.774 | 1.00 | 0.00 |
| ATOM | 288 | OE1  | GLN | 19 | 5.006  | 0.796  | 14.127 | 1.00 | 0.00 |
| ATOM | 289 | NE2  | GLN | 19 | 5.188  | -0.240 | 16.039 | 1.00 | 0.00 |
| ATOM | 290 | HE21 | GLN | 19 | 4.560  | 0.419  | 16.475 | 1.00 | 0.00 |
| ATOM | 291 | HE22 | GLN | 19 | 5.588  | -0.997 | 16.575 | 1.00 | 0.00 |
| ATOM | 292 | C    | GLN | 19 | 6.737  | -2.273 | 10.472 | 1.00 | 0.00 |
| ATOM | 293 | O    | GLN | 19 | 5.706  | -2.801 | 10.105 | 1.00 | 0.00 |
| ATOM | 294 | N    | VAL | 20 | 7.581  | -1.769 | 9.613  | 1.00 | 0.00 |
| ATOM | 295 | H    | VAL | 20 | 8.440  | -1.327 | 9.908  | 1.00 | 0.00 |

|      |     |      |     |    |        |        |       |      |      |
|------|-----|------|-----|----|--------|--------|-------|------|------|
| ATOM | 296 | CA   | VAL | 20 | 7.285  | -1.835 | 8.154 | 1.00 | 0.00 |
| ATOM | 297 | HA   | VAL | 20 | 6.247  | -1.562 | 7.967 | 1.00 | 0.00 |
| ATOM | 298 | CB   | VAL | 20 | 8.192  | -0.858 | 7.401 | 1.00 | 0.00 |
| ATOM | 299 | HB   | VAL | 20 | 8.200  | 0.100  | 7.919 | 1.00 | 0.00 |
| ATOM | 300 | CG1  | VAL | 20 | 9.615  | -1.417 | 7.341 | 1.00 | 0.00 |
| ATOM | 301 | HG11 | VAL | 20 | 9.608  | -2.376 | 6.822 | 1.00 | 0.00 |
| ATOM | 302 | HG12 | VAL | 20 | 10.258 | -0.720 | 6.804 | 1.00 | 0.00 |
| ATOM | 303 | HG13 | VAL | 20 | 9.995  | -1.555 | 8.353 | 1.00 | 0.00 |
| ATOM | 304 | CG2  | VAL | 20 | 7.662  | -0.664 | 5.979 | 1.00 | 0.00 |
| ATOM | 305 | HG21 | VAL | 20 | 6.650  | -0.263 | 6.020 | 1.00 | 0.00 |
| ATOM | 306 | HG22 | VAL | 20 | 8.307  | 0.031  | 5.442 | 1.00 | 0.00 |
| ATOM | 307 | HG23 | VAL | 20 | 7.651  | -1.623 | 5.461 | 1.00 | 0.00 |
| ATOM | 308 | C    | VAL | 20 | 7.534  | -3.259 | 7.650 | 1.00 | 0.00 |
| ATOM | 309 | O    | VAL | 20 | 6.879  | -3.728 | 6.739 | 1.00 | 0.00 |
| ATOM | 310 | N    | ASP | 21 | 8.474  | -3.951 | 8.235 | 1.00 | 0.00 |
| ATOM | 311 | H    | ASP | 21 | 9.023  | -3.567 | 8.991 | 1.00 | 0.00 |
| ATOM | 312 | CA   | ASP | 21 | 8.762  | -5.343 | 7.790 | 1.00 | 0.00 |
| ATOM | 313 | HA   | ASP | 21 | 9.175  | -5.340 | 6.781 | 1.00 | 0.00 |
| ATOM | 314 | CB   | ASP | 21 | 9.783  | -5.979 | 8.733 | 1.00 | 0.00 |
| ATOM | 315 | HB2  | ASP | 21 | 9.473  | -5.822 | 9.766 | 1.00 | 0.00 |
| ATOM | 316 | HB3  | ASP | 21 | 9.847  | -7.049 | 8.532 | 1.00 | 0.00 |
| ATOM | 317 | CG   | ASP | 21 | 11.154 | -5.336 | 8.509 | 1.00 | 0.00 |

|      |     |      |     |    |        |        |        |      |      |
|------|-----|------|-----|----|--------|--------|--------|------|------|
| ATOM | 318 | OD1  | ASP | 21 | 11.273 | -4.552 | 7.581  | 1.00 | 0.00 |
| ATOM | 319 | OD2  | ASP | 21 | 12.059 | -5.638 | 9.268  | 1.00 | 0.00 |
| ATOM | 320 | C    | ASP | 21 | 7.470  | -6.163 | 7.808  | 1.00 | 0.00 |
| ATOM | 321 | O    | ASP | 21 | 7.288  | -7.070 | 7.021  | 1.00 | 0.00 |
| ATOM | 322 | N    | ARG | 22 | 6.572  | -5.849 | 8.700  | 1.00 | 0.00 |
| ATOM | 323 | H    | ARG | 22 | 6.717  | -5.097 | 9.358  | 1.00 | 0.00 |
| ATOM | 324 | CA   | ARG | 22 | 5.292  | -6.610 | 8.767  | 1.00 | 0.00 |
| ATOM | 325 | HA   | ARG | 22 | 5.479  | -7.677 | 8.639  | 1.00 | 0.00 |
| ATOM | 326 | CB   | ARG | 22 | 4.637  | -6.388 | 10.133 | 1.00 | 0.00 |
| ATOM | 327 | HB2  | ARG | 22 | 5.357  | -6.607 | 10.922 | 1.00 | 0.00 |
| ATOM | 328 | HB3  | ARG | 22 | 4.312  | -5.352 | 10.216 | 1.00 | 0.00 |
| ATOM | 329 | CG   | ARG | 22 | 3.429  | -7.314 | 10.275 | 1.00 | 0.00 |
| ATOM | 330 | HG2  | ARG | 22 | 2.755  | -7.165 | 9.432  | 1.00 | 0.00 |
| ATOM | 331 | HG3  | ARG | 22 | 3.765  | -8.351 | 10.291 | 1.00 | 0.00 |
| ATOM | 332 | CD   | ARG | 22 | 2.693  | -6.996 | 11.579 | 1.00 | 0.00 |
| ATOM | 333 | HD2  | ARG | 22 | 3.391  | -6.997 | 12.416 | 1.00 | 0.00 |
| ATOM | 334 | HD3  | ARG | 22 | 2.209  | -6.022 | 11.511 | 1.00 | 0.00 |
| ATOM | 335 | NE   | ARG | 22 | 1.650  | -8.032 | 11.826 | 1.00 | 0.00 |
| ATOM | 336 | HE   | ARG | 22 | 1.525  | -8.450 | 12.737 | 1.00 | 0.00 |
| ATOM | 337 | CZ   | ARG | 22 | 0.873  | -8.419 | 10.851 | 1.00 | 0.00 |
| ATOM | 338 | NH1  | ARG | 22 | -0.361 | -7.996 | 10.793 | 1.00 | 0.00 |
| ATOM | 339 | HH11 | ARG | 22 | -0.711 | -7.370 | 11.504 | 1.00 | 0.00 |

|      |     |      |     |    |        |        |        |      |      |
|------|-----|------|-----|----|--------|--------|--------|------|------|
| ATOM | 340 | HH12 | ARG | 22 | -0.960 | -8.298 | 10.037 | 1.00 | 0.00 |
| ATOM | 341 | NH2  | ARG | 22 | 1.328  | -9.229 | 9.935  | 1.00 | 0.00 |
| ATOM | 342 | HH21 | ARG | 22 | 2.283  | -9.556 | 9.983  | 1.00 | 0.00 |
| ATOM | 343 | HH22 | ARG | 22 | 0.724  | -9.526 | 9.182  | 1.00 | 0.00 |
| ATOM | 344 | C    | ARG | 22 | 4.354  | -6.123 | 7.664  | 1.00 | 0.00 |
| ATOM | 345 | O    | ARG | 22 | 3.400  | -6.786 | 7.308  | 1.00 | 0.00 |
| ATOM | 346 | N    | VAL | 23 | 4.616  | -4.967 | 7.118  | 1.00 | 0.00 |
| ATOM | 347 | H    | VAL | 23 | 5.407  | -4.411 | 7.410  | 1.00 | 0.00 |
| ATOM | 348 | CA   | VAL | 23 | 3.740  | -4.436 | 6.036  | 1.00 | 0.00 |
| ATOM | 349 | HA   | VAL | 23 | 2.818  | -4.037 | 6.457  | 1.00 | 0.00 |
| ATOM | 350 | CB   | VAL | 23 | 4.468  | -3.311 | 5.297  | 1.00 | 0.00 |
| ATOM | 351 | HB   | VAL | 23 | 5.475  | -3.638 | 5.037  | 1.00 | 0.00 |
| ATOM | 352 | CG1  | VAL | 23 | 3.701  | -2.960 | 4.020  | 1.00 | 0.00 |
| ATOM | 353 | HG11 | VAL | 23 | 2.694  | -2.633 | 4.279  | 1.00 | 0.00 |
| ATOM | 354 | HG12 | VAL | 23 | 4.219  | -2.159 | 3.493  | 1.00 | 0.00 |
| ATOM | 355 | HG13 | VAL | 23 | 3.643  | -3.839 | 3.377  | 1.00 | 0.00 |
| ATOM | 356 | CG2  | VAL | 23 | 4.550  | -2.078 | 6.199  | 1.00 | 0.00 |
| ATOM | 357 | HG21 | VAL | 23 | 5.097  | -2.329 | 7.108  | 1.00 | 0.00 |
| ATOM | 358 | HG22 | VAL | 23 | 5.069  | -1.277 | 5.673  | 1.00 | 0.00 |
| ATOM | 359 | HG23 | VAL | 23 | 3.544  | -1.750 | 6.459  | 1.00 | 0.00 |
| ATOM | 360 | C    | VAL | 23 | 3.406  | -5.559 | 5.053  | 1.00 | 0.00 |
| ATOM | 361 | O    | VAL | 23 | 2.368  | -6.184 | 5.138  | 1.00 | 0.00 |

|      |     |      |     |    |       |        |       |      |      |
|------|-----|------|-----|----|-------|--------|-------|------|------|
| ATOM | 362 | N    | ASN | 24 | 4.279 | -5.819 | 4.121 | 1.00 | 0.00 |
| ATOM | 363 | H    | ASN | 24 | 5.144 | -5.304 | 4.046 | 1.00 | 0.00 |
| ATOM | 364 | CA   | ASN | 24 | 4.013 | -6.900 | 3.132 | 1.00 | 0.00 |
| ATOM | 365 | HA   | ASN | 24 | 4.783 | -6.906 | 2.361 | 1.00 | 0.00 |
| ATOM | 366 | CB   | ASN | 24 | 4.024 | -8.254 | 3.844 | 1.00 | 0.00 |
| ATOM | 367 | HB2  | ASN | 24 | 3.255 | -8.282 | 4.615 | 1.00 | 0.00 |
| ATOM | 368 | HB3  | ASN | 24 | 3.851 | -9.059 | 3.129 | 1.00 | 0.00 |
| ATOM | 369 | CG   | ASN | 24 | 5.387 | -8.472 | 4.505 | 1.00 | 0.00 |
| ATOM | 370 | OD1  | ASN | 24 | 6.355 | -7.825 | 4.155 | 1.00 | 0.00 |
| ATOM | 371 | ND2  | ASN | 24 | 5.505 | -9.362 | 5.452 | 1.00 | 0.00 |
| ATOM | 372 | HD21 | ASN | 24 | 6.402 | -9.511 | 5.892 | 1.00 | 0.00 |
| ATOM | 373 | HD22 | ASN | 24 | 4.699 | -9.898 | 5.740 | 1.00 | 0.00 |
| ATOM | 374 | C    | ASN | 24 | 2.644 | -6.672 | 2.486 | 1.00 | 0.00 |
| ATOM | 375 | O    | ASN | 24 | 1.682 | -7.346 | 2.794 | 1.00 | 0.00 |
| ATOM | 376 | N    | LEU | 25 | 2.550 | -5.727 | 1.592 | 1.00 | 0.00 |
| ATOM | 377 | H    | LEU | 25 | 3.347 | -5.165 | 1.330 | 1.00 | 0.00 |
| ATOM | 378 | CA   | LEU | 25 | 1.244 | -5.456 | 0.927 | 1.00 | 0.00 |
| ATOM | 379 | HA   | LEU | 25 | 0.449 | -6.027 | 1.407 | 1.00 | 0.00 |
| ATOM | 380 | CB   | LEU | 25 | 0.914 | -3.966 | 1.042 | 1.00 | 0.00 |
| ATOM | 381 | HB2  | LEU | 25 | 1.806 | -3.379 | 0.824 | 1.00 | 0.00 |
| ATOM | 382 | HB3  | LEU | 25 | 0.129 | -3.712 | 0.330 | 1.00 | 0.00 |
| ATOM | 383 | CG   | LEU | 25 | 0.434 | -3.657 | 2.462 | 1.00 | 0.00 |

|      |     |      |     |    |        |         |        |      |      |
|------|-----|------|-----|----|--------|---------|--------|------|------|
| ATOM | 384 | HG   | LEU | 25 | 1.074  | -4.169  | 3.181  | 1.00 | 0.00 |
| ATOM | 385 | CD1  | LEU | 25 | 0.497  | -2.149  | 2.706  | 1.00 | 0.00 |
| ATOM | 386 | HD11 | LEU | 25 | -0.143 | -1.638  | 1.987  | 1.00 | 0.00 |
| ATOM | 387 | HD12 | LEU | 25 | 0.155  | -1.930  | 3.717  | 1.00 | 0.00 |
| ATOM | 388 | HD13 | LEU | 25 | 1.524  | -1.804  | 2.587  | 1.00 | 0.00 |
| ATOM | 389 | CD2  | LEU | 25 | -1.009 | -4.141  | 2.629  | 1.00 | 0.00 |
| ATOM | 390 | HD21 | LEU | 25 | -1.054 | -5.217  | 2.456  | 1.00 | 0.00 |
| ATOM | 391 | HD22 | LEU | 25 | -1.351 | -3.922  | 3.640  | 1.00 | 0.00 |
| ATOM | 392 | HD23 | LEU | 25 | -1.649 | -3.631  | 1.910  | 1.00 | 0.00 |
| ATOM | 393 | C    | LEU | 25 | 1.336  | -5.845  | -0.550 | 1.00 | 0.00 |
| ATOM | 394 | O    | LEU | 25 | 1.308  | -5.004  | -1.427 | 1.00 | 0.00 |
| ATOM | 395 | N    | LYS | 26 | 1.445  | -7.115  | -0.832 | 1.00 | 0.00 |
| ATOM | 396 | H    | LYS | 26 | 1.473  | -7.816  | -0.105 | 1.00 | 0.00 |
| ATOM | 397 | CA   | LYS | 26 | 1.541  | -7.563  | -2.250 | 1.00 | 0.00 |
| ATOM | 398 | HA   | LYS | 26 | 2.330  | -7.018  | -2.768 | 1.00 | 0.00 |
| ATOM | 399 | CB   | LYS | 26 | 1.873  | -9.056  | -2.288 | 1.00 | 0.00 |
| ATOM | 400 | HB2  | LYS | 26 | 2.730  | -9.255  | -1.645 | 1.00 | 0.00 |
| ATOM | 401 | HB3  | LYS | 26 | 1.015  | -9.629  | -1.937 | 1.00 | 0.00 |
| ATOM | 402 | CG   | LYS | 26 | 2.207  | -9.467  | -3.724 | 1.00 | 0.00 |
| ATOM | 403 | HG2  | LYS | 26 | 1.640  | -10.360 | -3.988 | 1.00 | 0.00 |
| ATOM | 404 | HG3  | LYS | 26 | 1.946  | -8.657  | -4.404 | 1.00 | 0.00 |
| ATOM | 405 | CD   | LYS | 26 | 3.704  | -9.763  | -3.835 | 1.00 | 0.00 |



|      |     |         |    |        |         |        |      |      |
|------|-----|---------|----|--------|---------|--------|------|------|
| ATOM | 406 | HD2 LYS | 26 | 4.099  | -9.308  | -4.743 | 1.00 | 0.00 |
| ATOM | 407 | HD3 LYS | 26 | 4.221  | -9.352  | -2.968 | 1.00 | 0.00 |
| ATOM | 408 | CE LYS  | 26 | 3.923  | -11.277 | -3.888 | 1.00 | 0.00 |
| ATOM | 409 | HE2 LYS | 26 | 4.238  | -11.634 | -2.907 | 1.00 | 0.00 |
| ATOM | 410 | HE3 LYS | 26 | 2.993  | -11.770 | -4.172 | 1.00 | 0.00 |
| ATOM | 411 | NZ LYS  | 26 | 4.978  | -11.592 | -4.892 | 1.00 | 0.00 |
| ATOM | 412 | HZ1 LYS | 26 | 5.840  | -11.137 | -4.629 | 1.00 | 0.00 |
| ATOM | 413 | HZ2 LYS | 26 | 5.122  | -12.591 | -4.927 | 1.00 | 0.00 |
| ATOM | 414 | HZ3 LYS | 26 | 4.687  | -11.263 | -5.801 | 1.00 | 0.00 |
| ATOM | 415 | C LYS   | 26 | 0.214  | -7.318  | -2.980 | 1.00 | 0.00 |
| ATOM | 416 | O LYS   | 26 | 0.203  | -6.964  | -4.142 | 1.00 | 0.00 |
| ATOM | 417 | N PRO   | 27 | -0.931 | -7.515  | -2.298 | 1.00 | 0.00 |
| ATOM | 418 | CD PRO  | 27 | -1.040 | -7.940  | -0.888 | 1.00 | 0.00 |
| ATOM | 419 | HD2 PRO | 27 | -0.351 | -7.358  | -0.276 | 1.00 | 0.00 |
| ATOM | 420 | HD3 PRO | 27 | -0.792 | -8.999  | -0.805 | 1.00 | 0.00 |
| ATOM | 421 | CG PRO  | 27 | -2.479 | -7.661  | -0.561 | 1.00 | 0.00 |
| ATOM | 422 | HG2 PRO | 27 | -2.572 | -6.653  | -0.159 | 1.00 | 0.00 |
| ATOM | 423 | HG3 PRO | 27 | -2.830 | -8.381  | 0.179  | 1.00 | 0.00 |
| ATOM | 424 | CB PRO  | 27 | -3.226 | -7.807  | -1.841 | 1.00 | 0.00 |
| ATOM | 425 | HB2 PRO | 27 | -4.100 | -7.158  | -1.811 | 1.00 | 0.00 |
| ATOM | 426 | HB3 PRO | 27 | -3.539 | -8.828  | -2.063 | 1.00 | 0.00 |
| ATOM | 427 | CA PRO  | 27 | -2.252 | -7.317  | -2.911 | 1.00 | 0.00 |

|      |     |     |     |    |        |        |        |      |      |
|------|-----|-----|-----|----|--------|--------|--------|------|------|
| ATOM | 428 | HA  | PRO | 27 | -2.296 | -7.905 | -3.828 | 1.00 | 0.00 |
| ATOM | 429 | C   | PRO | 27 | -2.513 | -5.843 | -3.237 | 1.00 | 0.00 |
| ATOM | 430 | O   | PRO | 27 | -3.060 | -5.516 | -4.272 | 1.00 | 0.00 |
| ATOM | 431 | N   | CYX | 28 | -2.117 | -4.950 | -2.372 | 1.00 | 0.00 |
| ATOM | 432 | H   | CYX | 28 | -1.655 | -5.208 | -1.511 | 1.00 | 0.00 |
| ATOM | 433 | CA  | CYX | 28 | -2.338 | -3.503 | -2.650 | 1.00 | 0.00 |
| ATOM | 434 | HA  | CYX | 28 | -3.392 | -3.314 | -2.850 | 1.00 | 0.00 |
| ATOM | 435 | CB  | CYX | 28 | -1.915 | -2.677 | -1.433 | 1.00 | 0.00 |
| ATOM | 436 | HB2 | CYX | 28 | -1.254 | -3.272 | -0.802 | 1.00 | 0.00 |
| ATOM | 437 | HB3 | CYX | 28 | -1.390 | -1.782 | -1.766 | 1.00 | 0.00 |
| ATOM | 438 | SG  | CYX | 28 | -3.375 | -2.273 | -0.442 | 1.00 | 0.00 |
| ATOM | 439 | C   | CYX | 28 | -1.492 | -3.105 | -3.860 | 1.00 | 0.00 |
| ATOM | 440 | O   | CYX | 28 | -1.996 | -2.620 | -4.858 | 1.00 | 0.00 |
| ATOM | 441 | N   | GLU | 29 | -0.206 | -3.317 | -3.787 | 1.00 | 0.00 |
| ATOM | 442 | H   | GLU | 29 | 0.221  | -3.723 | -2.966 | 1.00 | 0.00 |
| ATOM | 443 | CA  | GLU | 29 | 0.669  | -2.966 | -4.935 | 1.00 | 0.00 |
| ATOM | 444 | HA  | GLU | 29 | 0.721  | -1.884 | -5.052 | 1.00 | 0.00 |
| ATOM | 445 | CB  | GLU | 29 | 2.080  | -3.499 | -4.687 | 1.00 | 0.00 |
| ATOM | 446 | HB2 | GLU | 29 | 2.319  | -3.417 | -3.627 | 1.00 | 0.00 |
| ATOM | 447 | HB3 | GLU | 29 | 2.133  | -4.545 | -4.991 | 1.00 | 0.00 |
| ATOM | 448 | CG  | GLU | 29 | 3.084  | -2.682 | -5.500 | 1.00 | 0.00 |
| ATOM | 449 | HG2 | GLU | 29 | 2.810  | -2.714 | -6.555 | 1.00 | 0.00 |

|      |     |      |     |    |        |         |        |      |      |
|------|-----|------|-----|----|--------|---------|--------|------|------|
| ATOM | 450 | HG3  | GLU | 29 | 3.075  | -1.649  | -5.154 | 1.00 | 0.00 |
| ATOM | 451 | CD   | GLU | 29 | 4.486  | -3.267  | -5.320 | 1.00 | 0.00 |
| ATOM | 452 | OE1  | GLU | 29 | 4.617  | -4.217  | -4.564 | 1.00 | 0.00 |
| ATOM | 453 | OE2  | GLU | 29 | 5.404  | -2.758  | -5.940 | 1.00 | 0.00 |
| ATOM | 454 | C    | GLU | 29 | 0.100  | -3.604  | -6.202 | 1.00 | 0.00 |
| ATOM | 455 | O    | GLU | 29 | 0.192  | -3.058  | -7.284 | 1.00 | 0.00 |
| ATOM | 456 | N    | GLN | 30 | -0.484 | -4.764  | -6.077 | 1.00 | 0.00 |
| ATOM | 457 | H    | GLN | 30 | -0.558 | -5.227  | -5.182 | 1.00 | 0.00 |
| ATOM | 458 | CA   | GLN | 30 | -1.056 | -5.442  | -7.271 | 1.00 | 0.00 |
| ATOM | 459 | HA   | GLN | 30 | -0.323 | -5.469  | -8.078 | 1.00 | 0.00 |
| ATOM | 460 | CB   | GLN | 30 | -1.436 | -6.879  | -6.909 | 1.00 | 0.00 |
| ATOM | 461 | HB2  | GLN | 30 | -1.855 | -6.903  | -5.903 | 1.00 | 0.00 |
| ATOM | 462 | HB3  | GLN | 30 | -2.175 | -7.250  | -7.619 | 1.00 | 0.00 |
| ATOM | 463 | CG   | GLN | 30 | -0.188 | -7.765  | -6.962 | 1.00 | 0.00 |
| ATOM | 464 | HG2  | GLN | 30 | 0.132  | -7.905  | -7.995 | 1.00 | 0.00 |
| ATOM | 465 | HG3  | GLN | 30 | 0.623  | -7.314  | -6.390 | 1.00 | 0.00 |
| ATOM | 466 | CD   | GLN | 30 | -0.508 | -9.133  | -6.360 | 1.00 | 0.00 |
| ATOM | 467 | OE1  | GLN | 30 | -1.605 | -9.363  | -5.890 | 1.00 | 0.00 |
| ATOM | 468 | NE2  | GLN | 30 | 0.411  | -10.060 | -6.352 | 1.00 | 0.00 |
| ATOM | 469 | HE21 | GLN | 30 | 0.207  | -10.967 | -5.956 | 1.00 | 0.00 |
| ATOM | 470 | HE22 | GLN | 30 | 1.323  | -9.867  | -6.742 | 1.00 | 0.00 |
| ATOM | 471 | C    | GLN | 30 | -2.300 | -4.687  | -7.746 | 1.00 | 0.00 |

|      |     |     |     |    |        |        |        |      |      |
|------|-----|-----|-----|----|--------|--------|--------|------|------|
| ATOM | 472 | O   | GLN | 30 | -2.676 | -4.764 | -8.899 | 1.00 | 0.00 |
| ATOM | 473 | N   | HID | 31 | -2.942 | -3.953 | -6.877 | 1.00 | 0.00 |
| ATOM | 474 | H   | HID | 31 | -2.641 | -3.879 | -5.916 | 1.00 | 0.00 |
| ATOM | 475 | CA  | HID | 31 | -4.152 | -3.197 | -7.298 | 1.00 | 0.00 |
| ATOM | 476 | HA  | HID | 31 | -4.765 | -3.805 | -7.963 | 1.00 | 0.00 |
| ATOM | 477 | CB  | HID | 31 | -4.982 | -2.834 | -6.062 | 1.00 | 0.00 |
| ATOM | 478 | HB2 | HID | 31 | -5.655 | -3.642 | -5.775 | 1.00 | 0.00 |
| ATOM | 479 | HB3 | HID | 31 | -4.357 | -2.564 | -5.211 | 1.00 | 0.00 |
| ATOM | 480 | CG  | HID | 31 | -5.846 | -1.637 | -6.359 | 1.00 | 0.00 |
| ATOM | 481 | ND1 | HID | 31 | -6.917 | -1.697 | -7.237 | 1.00 | 0.00 |
| ATOM | 482 | HD1 | HID | 31 | -7.224 | -2.509 | -7.754 | 1.00 | 0.00 |
| ATOM | 483 | CE1 | HID | 31 | -7.477 | -0.474 | -7.278 | 1.00 | 0.00 |
| ATOM | 484 | HE1 | HID | 31 | -8.342 | -0.344 | -7.929 | 1.00 | 0.00 |
| ATOM | 485 | NE2 | HID | 31 | -6.842 | 0.389  | -6.480 | 1.00 | 0.00 |
| ATOM | 486 | CD2 | HID | 31 | -5.811 | -0.343 | -5.898 | 1.00 | 0.00 |
| ATOM | 487 | HD2 | HID | 31 | -5.132 | 0.137  | -5.193 | 1.00 | 0.00 |
| ATOM | 488 | C   | HID | 31 | -3.699 | -1.929 | -8.013 | 1.00 | 0.00 |
| ATOM | 489 | O   | HID | 31 | -4.432 | -1.331 | -8.776 | 1.00 | 0.00 |
| ATOM | 490 | N   | ILE | 32 | -2.485 | -1.521 | -7.772 | 1.00 | 0.00 |
| ATOM | 491 | H   | ILE | 32 | -1.875 | -2.015 | -7.136 | 1.00 | 0.00 |
| ATOM | 492 | CA  | ILE | 32 | -1.966 | -0.295 | -8.438 | 1.00 | 0.00 |
| ATOM | 493 | HA  | ILE | 32 | -2.802 | 0.360  | -8.682 | 1.00 | 0.00 |

|      |     |      |     |    |        |        |         |      |      |
|------|-----|------|-----|----|--------|--------|---------|------|------|
| ATOM | 494 | CB   | ILE | 32 | -0.996 | 0.439  | -7.506  | 1.00 | 0.00 |
| ATOM | 495 | HB   | ILE | 32 | -0.033 | 0.561  | -8.002  | 1.00 | 0.00 |
| ATOM | 496 | CG2  | ILE | 32 | -1.569 | 1.811  | -7.164  | 1.00 | 0.00 |
| ATOM | 497 | HG21 | ILE | 32 | -2.531 | 1.689  | -6.667  | 1.00 | 0.00 |
| ATOM | 498 | HG22 | ILE | 32 | -0.882 | 2.337  | -6.501  | 1.00 | 0.00 |
| ATOM | 499 | HG23 | ILE | 32 | -1.703 | 2.387  | -8.079  | 1.00 | 0.00 |
| ATOM | 500 | CG1  | ILE | 32 | -0.801 | -0.364 | -6.216  | 1.00 | 0.00 |
| ATOM | 501 | HG12 | ILE | 32 | -1.774 | -0.607 | -5.790  | 1.00 | 0.00 |
| ATOM | 502 | HG13 | ILE | 32 | -0.263 | -1.286 | -6.441  | 1.00 | 0.00 |
| ATOM | 503 | CD1  | ILE | 32 | 0.003  | 0.463  | -5.211  | 1.00 | 0.00 |
| ATOM | 504 | HD11 | ILE | 32 | -0.534 | 1.384  | -4.985  | 1.00 | 0.00 |
| ATOM | 505 | HD12 | ILE | 32 | 0.140  | -0.111 | -4.295  | 1.00 | 0.00 |
| ATOM | 506 | HD13 | ILE | 32 | 0.977  | 0.705  | -5.636  | 1.00 | 0.00 |
| ATOM | 507 | C    | ILE | 32 | -1.238 | -0.689 | -9.722  | 1.00 | 0.00 |
| ATOM | 508 | O    | ILE | 32 | -1.511 | -0.168 | -10.785 | 1.00 | 0.00 |
| ATOM | 509 | N    | MET | 33 | -0.319 | -1.610 | -9.636  | 1.00 | 0.00 |
| ATOM | 510 | H    | MET | 33 | -0.086 | -2.050 | -8.757  | 1.00 | 0.00 |
| ATOM | 511 | CA   | MET | 33 | 0.418  | -2.039 | -10.857 | 1.00 | 0.00 |
| ATOM | 512 | HA   | MET | 33 | 0.930  | -1.189 | -11.308 | 1.00 | 0.00 |
| ATOM | 513 | CB   | MET | 33 | 1.461  | -3.093 | -10.479 | 1.00 | 0.00 |
| ATOM | 514 | HB2  | MET | 33 | 0.957  | -3.992 | -10.123 | 1.00 | 0.00 |
| ATOM | 515 | HB3  | MET | 33 | 2.064  | -3.338 | -11.353 | 1.00 | 0.00 |

|      |     |     |     |    |        |        |         |      |      |
|------|-----|-----|-----|----|--------|--------|---------|------|------|
| ATOM | 516 | CG  | MET | 33 | 2.365  | -2.544 | -9.374  | 1.00 | 0.00 |
| ATOM | 517 | HG2 | MET | 33 | 2.765  | -1.575 | -9.672  | 1.00 | 0.00 |
| ATOM | 518 | HG3 | MET | 33 | 1.794  | -2.433 | -8.452  | 1.00 | 0.00 |
| ATOM | 519 | SD  | MET | 33 | 3.736  | -3.691 | -9.090  | 1.00 | 0.00 |
| ATOM | 520 | CE  | MET | 33 | 4.867  | -2.999 | -10.321 | 1.00 | 0.00 |
| ATOM | 521 | HE1 | MET | 33 | 5.076  | -1.957 | -10.079 | 1.00 | 0.00 |
| ATOM | 522 | HE2 | MET | 33 | 5.799  | -3.566 | -10.318 | 1.00 | 0.00 |
| ATOM | 523 | HE3 | MET | 33 | 4.410  | -3.058 | -11.309 | 1.00 | 0.00 |
| ATOM | 524 | C   | MET | 33 | -0.572 | -2.634 | -11.858 | 1.00 | 0.00 |
| ATOM | 525 | O   | MET | 33 | -0.478 | -2.410 | -13.047 | 1.00 | 0.00 |
| ATOM | 526 | N   | GLN | 34 | -1.522 | -3.390 | -11.383 | 1.00 | 0.00 |
| ATOM | 527 | H   | GLN | 34 | -1.605 | -3.578 | -10.394 | 1.00 | 0.00 |
| ATOM | 528 | CA  | GLN | 34 | -2.520 | -4.003 | -12.305 | 1.00 | 0.00 |
| ATOM | 529 | HA  | GLN | 34 | -2.016 | -4.601 | -13.065 | 1.00 | 0.00 |
| ATOM | 530 | CB  | GLN | 34 | -3.457 | -4.913 | -11.508 | 1.00 | 0.00 |
| ATOM | 531 | HB2 | GLN | 34 | -3.809 | -4.386 | -10.622 | 1.00 | 0.00 |
| ATOM | 532 | HB3 | GLN | 34 | -4.309 | -5.190 | -12.128 | 1.00 | 0.00 |
| ATOM | 533 | CG  | GLN | 34 | -2.704 | -6.175 | -11.084 | 1.00 | 0.00 |
| ATOM | 534 | HG2 | GLN | 34 | -2.423 | -6.761 | -11.959 | 1.00 | 0.00 |
| ATOM | 535 | HG3 | GLN | 34 | -1.808 | -5.910 | -10.522 | 1.00 | 0.00 |
| ATOM | 536 | CD  | GLN | 34 | -3.605 | -7.031 | -10.192 | 1.00 | 0.00 |
| ATOM | 537 | OE1 | GLN | 34 | -4.660 | -6.595 | -9.777  | 1.00 | 0.00 |

|      |     |      |     |    |        |        |         |      |      |
|------|-----|------|-----|----|--------|--------|---------|------|------|
| ATOM | 538 | NE2  | GLN | 34 | -3.231 | -8.241 | -9.878  | 1.00 | 0.00 |
| ATOM | 539 | HE21 | GLN | 34 | -3.821 | -8.812 | -9.290  | 1.00 | 0.00 |
| ATOM | 540 | HE22 | GLN | 34 | -2.353 | -8.602 | -10.225 | 1.00 | 0.00 |
| ATOM | 541 | C    | GLN | 34 | -3.337 | -2.904 | -12.987 | 1.00 | 0.00 |
| ATOM | 542 | O    | GLN | 34 | -3.572 | -2.945 | -14.178 | 1.00 | 0.00 |
| ATOM | 543 | N    | ARG | 35 | -3.780 | -1.926 | -12.245 | 1.00 | 0.00 |
| ATOM | 544 | H    | ARG | 35 | -3.592 | -1.884 | -11.254 | 1.00 | 0.00 |
| ATOM | 545 | CA   | ARG | 35 | -4.589 | -0.834 | -12.859 | 1.00 | 0.00 |
| ATOM | 546 | HA   | ARG | 35 | -5.451 | -1.249 | -13.380 | 1.00 | 0.00 |
| ATOM | 547 | CB   | ARG | 35 | -5.087 | 0.107  | -11.762 | 1.00 | 0.00 |
| ATOM | 548 | HB2  | ARG | 35 | -4.306 | 0.239  | -11.013 | 1.00 | 0.00 |
| ATOM | 549 | HB3  | ARG | 35 | -5.338 | 1.073  | -12.198 | 1.00 | 0.00 |
| ATOM | 550 | CG   | ARG | 35 | -6.331 | -0.494 | -11.101 | 1.00 | 0.00 |
| ATOM | 551 | HG2  | ARG | 35 | -7.035 | -0.812 | -11.871 | 1.00 | 0.00 |
| ATOM | 552 | HG3  | ARG | 35 | -6.042 | -1.354 | -10.497 | 1.00 | 0.00 |
| ATOM | 553 | CD   | ARG | 35 | -6.992 | 0.558  | -10.208 | 1.00 | 0.00 |
| ATOM | 554 | HD2  | ARG | 35 | -7.402 | 1.364  | -10.815 | 1.00 | 0.00 |
| ATOM | 555 | HD3  | ARG | 35 | -7.789 | 0.105  | -9.619  | 1.00 | 0.00 |
| ATOM | 556 | NE   | ARG | 35 | -5.977 | 1.129  | -9.279  | 1.00 | 0.00 |
| ATOM | 557 | HE   | ARG | 35 | -5.129 | 0.629  | -9.052  | 1.00 | 0.00 |
| ATOM | 558 | CZ   | ARG | 35 | -6.174 | 2.299  | -8.736  | 1.00 | 0.00 |
| ATOM | 559 | NH1  | ARG | 35 | -6.689 | 3.268  | -9.443  | 1.00 | 0.00 |

|      |     |      |     |    |        |        |         |      |      |
|------|-----|------|-----|----|--------|--------|---------|------|------|
| ATOM | 560 | HH11 | ARG | 35 | -6.934 | 3.108  | -10.410 | 1.00 | 0.00 |
| ATOM | 561 | HH12 | ARG | 35 | -6.840 | 4.172  | -9.020  | 1.00 | 0.00 |
| ATOM | 562 | NH2  | ARG | 35 | -5.854 | 2.501  | -7.488  | 1.00 | 0.00 |
| ATOM | 563 | HH21 | ARG | 35 | -5.454 | 1.749  | -6.945  | 1.00 | 0.00 |
| ATOM | 564 | HH22 | ARG | 35 | -6.008 | 3.407  | -7.071  | 1.00 | 0.00 |
| ATOM | 565 | C    | ARG | 35 | -3.731 | -0.047 | -13.853 | 1.00 | 0.00 |
| ATOM | 566 | O    | ARG | 35 | -4.089 | 0.115  | -15.002 | 1.00 | 0.00 |
| ATOM | 567 | N    | ILE | 36 | -2.606 | 0.448  | -13.419 | 1.00 | 0.00 |
| ATOM | 568 | H    | ILE | 36 | -2.303 | 0.320  | -12.464 | 1.00 | 0.00 |
| ATOM | 569 | CA   | ILE | 36 | -1.732 | 1.230  | -14.339 | 1.00 | 0.00 |
| ATOM | 570 | HA   | ILE | 36 | -2.306 | 2.036  | -14.795 | 1.00 | 0.00 |
| ATOM | 571 | CB   | ILE | 36 | -0.564 | 1.821  | -13.547 | 1.00 | 0.00 |
| ATOM | 572 | HB   | ILE | 36 | 0.070  | 2.405  | -14.214 | 1.00 | 0.00 |
| ATOM | 573 | CG2  | ILE | 36 | -1.108 | 2.725  | -12.438 | 1.00 | 0.00 |
| ATOM | 574 | HG21 | ILE | 36 | -1.741 | 2.141  | -11.771 | 1.00 | 0.00 |
| ATOM | 575 | HG22 | ILE | 36 | -0.277 | 3.147  | -11.872 | 1.00 | 0.00 |
| ATOM | 576 | HG23 | ILE | 36 | -1.693 | 3.531  | -12.880 | 1.00 | 0.00 |
| ATOM | 577 | CG1  | ILE | 36 | 0.259  | 0.687  | -12.930 | 1.00 | 0.00 |
| ATOM | 578 | HG12 | ILE | 36 | -0.413 | -0.071 | -12.528 | 1.00 | 0.00 |
| ATOM | 579 | HG13 | ILE | 36 | 0.893  | 0.240  | -13.697 | 1.00 | 0.00 |
| ATOM | 580 | CD1  | ILE | 36 | 1.135  | 1.241  | -11.804 | 1.00 | 0.00 |
| ATOM | 581 | HD11 | ILE | 36 | 0.503  | 1.687  | -11.037 | 1.00 | 0.00 |



|      |     |      |     |    |        |        |         |      |      |
|------|-----|------|-----|----|--------|--------|---------|------|------|
| ATOM | 582 | HD12 | ILE | 36 | 1.720  | 0.432  | -11.366 | 1.00 | 0.00 |
| ATOM | 583 | HD13 | ILE | 36 | 1.808  | 1.998  | -12.206 | 1.00 | 0.00 |
| ATOM | 584 | C    | ILE | 36 | -1.191 | 0.320  | -15.444 | 1.00 | 0.00 |
| ATOM | 585 | O    | ILE | 36 | -0.676 | 0.782  | -16.442 | 1.00 | 0.00 |
| ATOM | 586 | N    | MET | 37 | -1.303 | -0.970 | -15.278 | 1.00 | 0.00 |
| ATOM | 587 | H    | MET | 37 | -1.727 | -1.368 | -14.452 | 1.00 | 0.00 |
| ATOM | 588 | CA   | MET | 37 | -0.791 | -1.899 | -16.327 | 1.00 | 0.00 |
| ATOM | 589 | HA   | MET | 37 | -0.140 | -1.365 | -17.019 | 1.00 | 0.00 |
| ATOM | 590 | CB   | MET | 37 | 0.012  | -3.023 | -15.670 | 1.00 | 0.00 |
| ATOM | 591 | HB2  | MET | 37 | -0.555 | -3.437 | -14.836 | 1.00 | 0.00 |
| ATOM | 592 | HB3  | MET | 37 | 0.207  | -3.808 | -16.402 | 1.00 | 0.00 |
| ATOM | 593 | CG   | MET | 37 | 1.341  | -2.465 | -15.155 | 1.00 | 0.00 |
| ATOM | 594 | HG2  | MET | 37 | 1.757  | -1.771 | -15.885 | 1.00 | 0.00 |
| ATOM | 595 | HG3  | MET | 37 | 1.182  | -1.946 | -14.210 | 1.00 | 0.00 |
| ATOM | 596 | SD   | MET | 37 | 2.506  | -3.825 | -14.896 | 1.00 | 0.00 |
| ATOM | 597 | CE   | MET | 37 | 1.511  | -4.754 | -13.704 | 1.00 | 0.00 |
| ATOM | 598 | HE1  | MET | 37 | 0.564  | -5.037 | -14.163 | 1.00 | 0.00 |
| ATOM | 599 | HE2  | MET | 37 | 2.050  | -5.653 | -13.402 | 1.00 | 0.00 |
| ATOM | 600 | HE3  | MET | 37 | 1.320  | -4.134 | -12.828 | 1.00 | 0.00 |
| ATOM | 601 | C    | MET | 37 | -1.969 | -2.495 | -17.099 | 1.00 | 0.00 |
| ATOM | 602 | O    | MET | 37 | -1.818 | -2.975 | -18.206 | 1.00 | 0.00 |
| ATOM | 603 | N    | GLY | 38 | -3.142 | -2.470 | -16.528 | 1.00 | 0.00 |

|      |     |     |     |    |        |        |         |      |      |
|------|-----|-----|-----|----|--------|--------|---------|------|------|
| ATOM | 604 | H   | GLY | 38 | -3.276 | -2.074 | -15.609 | 1.00 | 0.00 |
| ATOM | 605 | CA  | GLY | 38 | -4.326 | -3.036 | -17.233 | 1.00 | 0.00 |
| ATOM | 606 | HA2 | GLY | 38 | -4.117 | -4.057 | -17.555 | 1.00 | 0.00 |
| ATOM | 607 | HA3 | GLY | 38 | -5.191 | -3.035 | -16.571 | 1.00 | 0.00 |
| ATOM | 608 | C   | GLY | 38 | -4.638 | -2.180 | -18.463 | 1.00 | 0.00 |
| ATOM | 609 | O   | GLY | 38 | -5.217 | -2.646 | -19.425 | 1.00 | 0.00 |
| ATOM | 610 | N   | GLU | 39 | -4.259 | -0.932 | -18.438 | 1.00 | 0.00 |
| ATOM | 611 | H   | GLU | 39 | -3.779 | -0.539 | -17.641 | 1.00 | 0.00 |
| ATOM | 612 | CA  | GLU | 39 | -4.533 | -0.047 | -19.605 | 1.00 | 0.00 |
| ATOM | 613 | HA  | GLU | 39 | -5.601 | -0.029 | -19.823 | 1.00 | 0.00 |
| ATOM | 614 | CB  | GLU | 39 | -4.074 | 1.377  | -19.285 | 1.00 | 0.00 |
| ATOM | 615 | HB2 | GLU | 39 | -4.535 | 1.707  | -18.354 | 1.00 | 0.00 |
| ATOM | 616 | HB3 | GLU | 39 | -2.989 | 1.394  | -19.179 | 1.00 | 0.00 |
| ATOM | 617 | CG  | GLU | 39 | -4.490 | 2.314  | -20.420 | 1.00 | 0.00 |
| ATOM | 618 | HG2 | GLU | 39 | -4.113 | 1.927  | -21.367 | 1.00 | 0.00 |
| ATOM | 619 | HG3 | GLU | 39 | -5.577 | 2.376  | -20.460 | 1.00 | 0.00 |
| ATOM | 620 | CD  | GLU | 39 | -3.909 | 3.707  | -20.171 | 1.00 | 0.00 |
| ATOM | 621 | OE1 | GLU | 39 | -3.198 | 3.864  | -19.191 | 1.00 | 0.00 |
| ATOM | 622 | OE2 | GLU | 39 | -4.184 | 4.593  | -20.963 | 1.00 | 0.00 |
| ATOM | 623 | C   | GLU | 39 | -3.775 | -0.566 | -20.828 | 1.00 | 0.00 |
| ATOM | 624 | O   | GLU | 39 | -4.159 | -0.327 | -21.956 | 1.00 | 0.00 |
| ATOM | 625 | N   | GLN | 40 | -2.699 | -1.273 | -20.615 | 1.00 | 0.00 |

|      |     |      |     |    |        |        |         |      |      |
|------|-----|------|-----|----|--------|--------|---------|------|------|
| ATOM | 626 | H    | GLN | 40 | -2.371 | -1.475 | -19.681 | 1.00 | 0.00 |
| ATOM | 627 | CA   | GLN | 40 | -1.919 | -1.806 | -21.767 | 1.00 | 0.00 |
| ATOM | 628 | HA   | GLN | 40 | -1.645 | -0.998 | -22.445 | 1.00 | 0.00 |
| ATOM | 629 | CB   | GLN | 40 | -0.639 | -2.469 | -21.254 | 1.00 | 0.00 |
| ATOM | 630 | HB2  | GLN | 40 | -0.888 | -3.179 | -20.465 | 1.00 | 0.00 |
| ATOM | 631 | HB3  | GLN | 40 | -0.148 | -2.996 | -22.073 | 1.00 | 0.00 |
| ATOM | 632 | CG   | GLN | 40 | 0.303  | -1.399 | -20.699 | 1.00 | 0.00 |
| ATOM | 633 | HG2  | GLN | 40 | 0.560  | -0.680 | -21.477 | 1.00 | 0.00 |
| ATOM | 634 | HG3  | GLN | 40 | -0.167 | -0.879 | -19.865 | 1.00 | 0.00 |
| ATOM | 635 | CD   | GLN | 40 | 1.589  | -2.060 | -20.200 | 1.00 | 0.00 |
| ATOM | 636 | OE1  | GLN | 40 | 1.651  | -3.266 | -20.061 | 1.00 | 0.00 |
| ATOM | 637 | NE2  | GLN | 40 | 2.627  | -1.318 | -19.924 | 1.00 | 0.00 |
| ATOM | 638 | HE21 | GLN | 40 | 3.479  | -1.750 | -19.594 | 1.00 | 0.00 |
| ATOM | 639 | HE22 | GLN | 40 | 2.574  | -0.317 | -20.042 | 1.00 | 0.00 |
| ATOM | 640 | C    | GLN | 40 | -2.763 | -2.837 | -22.518 | 1.00 | 0.00 |
| ATOM | 641 | O    | GLN | 40 | -2.660 | -2.982 | -23.719 | 1.00 | 0.00 |
| ATOM | 642 | N    | GLU | 41 | -3.598 | -3.555 | -21.817 | 1.00 | 0.00 |
| ATOM | 643 | H    | GLU | 41 | -3.687 | -3.443 | -20.817 | 1.00 | 0.00 |
| ATOM | 644 | CA   | GLU | 41 | -4.450 | -4.575 | -22.492 | 1.00 | 0.00 |
| ATOM | 645 | HA   | GLU | 41 | -3.828 | -5.346 | -22.948 | 1.00 | 0.00 |
| ATOM | 646 | CB   | GLU | 41 | -5.369 | -5.234 | -21.461 | 1.00 | 0.00 |
| ATOM | 647 | HB2  | GLU | 41 | -5.980 | -4.472 | -20.979 | 1.00 | 0.00 |

|      |     |     |     |    |        |        |         |      |      |
|------|-----|-----|-----|----|--------|--------|---------|------|------|
| ATOM | 648 | HB3 | GLU | 41 | -6.016 | -5.956 | -21.960 | 1.00 | 0.00 |
| ATOM | 649 | CG  | GLU | 41 | -4.523 | -5.951 | -20.407 | 1.00 | 0.00 |
| ATOM | 650 | HG2 | GLU | 41 | -3.889 | -6.694 | -20.892 | 1.00 | 0.00 |
| ATOM | 651 | HG3 | GLU | 41 | -3.898 | -5.225 | -19.887 | 1.00 | 0.00 |
| ATOM | 652 | CD  | GLU | 41 | -5.443 | -6.645 | -19.401 | 1.00 | 0.00 |
| ATOM | 653 | OE1 | GLU | 41 | -6.638 | -6.412 | -19.463 | 1.00 | 0.00 |
| ATOM | 654 | OE2 | GLU | 41 | -4.936 | -7.398 | -18.587 | 1.00 | 0.00 |
| ATOM | 655 | C   | GLU | 41 | -5.295 | -3.898 | -23.573 | 1.00 | 0.00 |
| ATOM | 656 | O   | GLU | 41 | -5.798 | -2.809 | -23.387 | 1.00 | 0.00 |
| ATOM | 657 | N   | GLN | 42 | -5.455 | -4.536 | -24.700 | 1.00 | 0.00 |
| ATOM | 658 | H   | GLN | 42 | -5.038 | -5.442 | -24.863 | 1.00 | 0.00 |
| ATOM | 659 | CA  | GLN | 42 | -6.268 | -3.927 | -25.789 | 1.00 | 0.00 |
| ATOM | 660 | HA  | GLN | 42 | -5.868 | -2.950 | -26.059 | 1.00 | 0.00 |
| ATOM | 661 | CB  | GLN | 42 | -6.225 | -4.831 | -27.023 | 1.00 | 0.00 |
| ATOM | 662 | HB2 | GLN | 42 | -6.570 | -5.830 | -26.755 | 1.00 | 0.00 |
| ATOM | 663 | HB3 | GLN | 42 | -6.871 | -4.420 | -27.798 | 1.00 | 0.00 |
| ATOM | 664 | CG  | GLN | 42 | -4.790 | -4.911 | -27.546 | 1.00 | 0.00 |
| ATOM | 665 | HG2 | GLN | 42 | -4.136 | -5.353 | -26.794 | 1.00 | 0.00 |
| ATOM | 666 | HG3 | GLN | 42 | -4.752 | -5.510 | -28.456 | 1.00 | 0.00 |
| ATOM | 667 | CD  | GLN | 42 | -4.285 | -3.502 | -27.866 | 1.00 | 0.00 |
| ATOM | 668 | OE1 | GLN | 42 | -4.936 | -2.755 | -28.568 | 1.00 | 0.00 |
| ATOM | 669 | NE2 | GLN | 42 | -3.143 | -3.105 | -27.376 | 1.00 | 0.00 |

|      |     |      |     |    |         |        |         |      |      |
|------|-----|------|-----|----|---------|--------|---------|------|------|
| ATOM | 670 | HE21 | GLN | 42 | -2.803  | -2.177 | -27.583 | 1.00 | 0.00 |
| ATOM | 671 | HE22 | GLN | 42 | -2.603  | -3.728 | -26.792 | 1.00 | 0.00 |
| ATOM | 672 | C    | GLN | 42 | -7.715  | -3.770 | -25.319 | 1.00 | 0.00 |
| ATOM | 673 | O    | GLN | 42 | -8.386  | -2.814 | -25.651 | 1.00 | 0.00 |
| ATOM | 674 | N    | TYR | 43 | -8.202  | -4.703 | -24.546 | 1.00 | 0.00 |
| ATOM | 675 | H    | TYR | 43 | -7.650  | -5.501 | -24.264 | 1.00 | 0.00 |
| ATOM | 676 | CA   | TYR | 43 | -9.606  | -4.606 | -24.055 | 1.00 | 0.00 |
| ATOM | 677 | HA   | TYR | 43 | -10.090 | -3.721 | -24.468 | 1.00 | 0.00 |
| ATOM | 678 | CB   | TYR | 43 | -10.390 | -5.844 | -24.498 | 1.00 | 0.00 |
| ATOM | 679 | HB2  | TYR | 43 | -9.928  | -6.736 | -24.074 | 1.00 | 0.00 |
| ATOM | 680 | HB3  | TYR | 43 | -11.420 | -5.769 | -24.150 | 1.00 | 0.00 |
| ATOM | 681 | CG   | TYR | 43 | -10.374 | -5.937 | -26.005 | 1.00 | 0.00 |
| ATOM | 682 | CD1  | TYR | 43 | -11.249 | -5.150 | -26.764 | 1.00 | 0.00 |
| ATOM | 683 | HD1  | TYR | 43 | -11.940 | -4.470 | -26.268 | 1.00 | 0.00 |
| ATOM | 684 | CE1  | TYR | 43 | -11.235 | -5.238 | -28.161 | 1.00 | 0.00 |
| ATOM | 685 | HE1  | TYR | 43 | -11.916 | -4.626 | -28.752 | 1.00 | 0.00 |
| ATOM | 686 | CZ   | TYR | 43 | -10.348 | -6.113 | -28.799 | 1.00 | 0.00 |
| ATOM | 687 | OH   | TYR | 43 | -10.335 | -6.199 | -30.177 | 1.00 | 0.00 |
| ATOM | 688 | HH   | TYR | 43 | -10.973 | -5.617 | -30.595 | 1.00 | 0.00 |
| ATOM | 689 | CE2  | TYR | 43 | -9.473  | -6.899 | -28.040 | 1.00 | 0.00 |
| ATOM | 690 | HE2  | TYR | 43 | -8.781  | -7.580 | -28.536 | 1.00 | 0.00 |
| ATOM | 691 | CD2  | TYR | 43 | -9.487  | -6.811 | -26.644 | 1.00 | 0.00 |

|      |     |         |    |         |        |         |      |      |
|------|-----|---------|----|---------|--------|---------|------|------|
| ATOM | 692 | HD2 TYR | 43 | -8.806  | -7.424 | -26.053 | 1.00 | 0.00 |
| ATOM | 693 | C TYR   | 43 | -9.606  | -4.525 | -22.527 | 1.00 | 0.00 |
| ATOM | 694 | O TYR   | 43 | -8.659  | -4.917 | -21.875 | 1.00 | 0.00 |
| ATOM | 695 | N ASP   | 44 | -10.662 | -4.019 | -21.951 | 1.00 | 0.00 |
| ATOM | 696 | H ASP   | 44 | -11.453 | -3.692 | -22.486 | 1.00 | 0.00 |
| ATOM | 697 | CA ASP  | 44 | -10.721 | -3.913 | -20.466 | 1.00 | 0.00 |
| ATOM | 698 | HA ASP  | 44 | -10.727 | -4.906 | -20.017 | 1.00 | 0.00 |
| ATOM | 699 | CB ASP  | 44 | -9.493  | -3.154 | -19.957 | 1.00 | 0.00 |
| ATOM | 700 | HB2 ASP | 44 | -9.618  | -2.930 | -18.898 | 1.00 | 0.00 |
| ATOM | 701 | HB3 ASP | 44 | -8.602  | -3.767 | -20.095 | 1.00 | 0.00 |
| ATOM | 702 | CG ASP  | 44 | -9.340  | -1.848 | -20.740 | 1.00 | 0.00 |
| ATOM | 703 | OD1 ASP | 44 | -10.056 | -1.675 | -21.712 | 1.00 | 0.00 |
| ATOM | 704 | OD2 ASP | 44 | -8.507  | -1.045 | -20.353 | 1.00 | 0.00 |
| ATOM | 705 | C ASP   | 44 | -11.990 | -3.161 | -20.059 | 1.00 | 0.00 |
| ATOM | 706 | O ASP   | 44 | -12.697 | -3.558 | -19.155 | 1.00 | 0.00 |
| ATOM | 707 | N SER   | 45 | -12.285 | -2.075 | -20.721 | 1.00 | 0.00 |
| ATOM | 708 | H SER   | 45 | -11.702 | -1.737 | -21.473 | 1.00 | 0.00 |
| ATOM | 709 | CA SER  | 45 | -13.509 | -1.300 | -20.373 | 1.00 | 0.00 |
| ATOM | 710 | HA SER  | 45 | -13.387 | -0.814 | -19.405 | 1.00 | 0.00 |
| ATOM | 711 | CB SER  | 45 | -13.748 | -0.224 | -21.434 | 1.00 | 0.00 |
| ATOM | 712 | HB2 SER | 45 | -14.554 | 0.434  | -21.110 | 1.00 | 0.00 |
| ATOM | 713 | HB3 SER | 45 | -12.837 | 0.358  | -21.572 | 1.00 | 0.00 |

|      |     |     |     |    |         |        |         |      |      |
|------|-----|-----|-----|----|---------|--------|---------|------|------|
| ATOM | 714 | OG  | SER | 45 | -14.106 | -0.841 | -22.662 | 1.00 | 0.00 |
| ATOM | 715 | HG  | SER | 45 | -14.256 | -0.166 | -23.328 | 1.00 | 0.00 |
| ATOM | 716 | C   | SER | 45 | -14.712 | -2.242 | -20.321 | 1.00 | 0.00 |
| ATOM | 717 | O   | SER | 45 | -15.610 | -2.075 | -19.520 | 1.00 | 0.00 |
| ATOM | 718 | N   | TYR | 46 | -14.739 | -3.232 | -21.172 | 1.00 | 0.00 |
| ATOM | 719 | H   | TYR | 46 | -13.995 | -3.378 | -21.840 | 1.00 | 0.00 |
| ATOM | 720 | CA  | TYR | 46 | -15.885 | -4.183 | -21.173 | 1.00 | 0.00 |
| ATOM | 721 | HA  | TYR | 46 | -16.818 | -3.651 | -21.359 | 1.00 | 0.00 |
| ATOM | 722 | CB  | TYR | 46 | -15.685 | -5.221 | -22.279 | 1.00 | 0.00 |
| ATOM | 723 | HB2 | TYR | 46 | -14.719 | -5.711 | -22.151 | 1.00 | 0.00 |
| ATOM | 724 | HB3 | TYR | 46 | -16.479 | -5.966 | -22.226 | 1.00 | 0.00 |
| ATOM | 725 | CG  | TYR | 46 | -15.727 | -4.536 | -23.624 | 1.00 | 0.00 |
| ATOM | 726 | CD1 | TYR | 46 | -16.919 | -3.962 | -24.080 | 1.00 | 0.00 |
| ATOM | 727 | HD1 | TYR | 46 | -17.817 | -4.011 | -23.464 | 1.00 | 0.00 |
| ATOM | 728 | CE1 | TYR | 46 | -16.959 | -3.326 | -25.327 | 1.00 | 0.00 |
| ATOM | 729 | HE1 | TYR | 46 | -17.887 | -2.880 | -25.682 | 1.00 | 0.00 |
| ATOM | 730 | CZ  | TYR | 46 | -15.805 | -3.263 | -26.117 | 1.00 | 0.00 |
| ATOM | 731 | OH  | TYR | 46 | -15.844 | -2.637 | -27.346 | 1.00 | 0.00 |
| ATOM | 732 | HH  | TYR | 46 | -16.710 | -2.282 | -27.559 | 1.00 | 0.00 |
| ATOM | 733 | CE2 | TYR | 46 | -14.612 | -3.836 | -25.661 | 1.00 | 0.00 |
| ATOM | 734 | HE2 | TYR | 46 | -13.714 | -3.787 | -26.277 | 1.00 | 0.00 |
| ATOM | 735 | CD2 | TYR | 46 | -14.572 | -4.473 | -24.414 | 1.00 | 0.00 |

|      |     |     |     |    |         |        |         |      |      |
|------|-----|-----|-----|----|---------|--------|---------|------|------|
| ATOM | 736 | HD2 | TYR | 46 | -13.643 | -4.919 | -24.059 | 1.00 | 0.00 |
| ATOM | 737 | C   | TYR | 46 | -15.962 | -4.891 | -19.818 | 1.00 | 0.00 |
| ATOM | 738 | O   | TYR | 46 | -17.027 | -5.070 | -19.261 | 1.00 | 0.00 |
| ATOM | 739 | N   | ASP | 47 | -14.842 | -5.296 | -19.284 | 1.00 | 0.00 |
| ATOM | 740 | H   | ASP | 47 | -13.952 | -5.151 | -19.740 | 1.00 | 0.00 |
| ATOM | 741 | CA  | ASP | 47 | -14.855 | -5.992 | -17.967 | 1.00 | 0.00 |
| ATOM | 742 | HA  | ASP | 47 | -15.866 | -6.316 | -17.720 | 1.00 | 0.00 |
| ATOM | 743 | CB  | ASP | 47 | -13.950 | -7.224 | -18.032 | 1.00 | 0.00 |
| ATOM | 744 | HB2 | ASP | 47 | -12.956 | -6.932 | -18.372 | 1.00 | 0.00 |
| ATOM | 745 | HB3 | ASP | 47 | -13.877 | -7.673 | -17.041 | 1.00 | 0.00 |
| ATOM | 746 | CG  | ASP | 47 | -14.544 | -8.241 | -19.009 | 1.00 | 0.00 |
| ATOM | 747 | OD1 | ASP | 47 | -15.704 | -8.092 | -19.356 | 1.00 | 0.00 |
| ATOM | 748 | OD2 | ASP | 47 | -13.828 | -9.150 | -19.396 | 1.00 | 0.00 |
| ATOM | 749 | C   | ASP | 47 | -14.343 | -5.042 | -16.882 | 1.00 | 0.00 |
| ATOM | 750 | O   | ASP | 47 | -13.220 | -4.578 | -16.929 | 1.00 | 0.00 |
| ATOM | 751 | N   | ILE | 48 | -15.156 | -4.747 | -15.905 | 1.00 | 0.00 |
| ATOM | 752 | H   | ILE | 48 | -16.090 | -5.129 | -15.858 | 1.00 | 0.00 |
| ATOM | 753 | CA  | ILE | 48 | -14.714 | -3.826 | -14.820 | 1.00 | 0.00 |
| ATOM | 754 | HA  | ILE | 48 | -14.466 | -2.854 | -15.246 | 1.00 | 0.00 |
| ATOM | 755 | CB  | ILE | 48 | -15.842 | -3.663 | -13.799 | 1.00 | 0.00 |
| ATOM | 756 | HB  | ILE | 48 | -16.078 | -4.633 | -13.360 | 1.00 | 0.00 |
| ATOM | 757 | CG2 | ILE | 48 | -15.397 | -2.700 | -12.697 | 1.00 | 0.00 |



|      |     |      |     |    |         |        |         |      |      |
|------|-----|------|-----|----|---------|--------|---------|------|------|
| ATOM | 758 | HG21 | ILE | 48 | -15.160 | -1.731 | -13.135 | 1.00 | 0.00 |
| ATOM | 759 | HG22 | ILE | 48 | -16.200 | -2.584 | -11.969 | 1.00 | 0.00 |
| ATOM | 760 | HG23 | ILE | 48 | -14.512 | -3.100 | -12.200 | 1.00 | 0.00 |
| ATOM | 761 | CG1  | ILE | 48 | -17.084 | -3.102 | -14.495 | 1.00 | 0.00 |
| ATOM | 762 | HG12 | ILE | 48 | -16.884 | -2.085 | -14.832 | 1.00 | 0.00 |
| ATOM | 763 | HG13 | ILE | 48 | -17.333 | -3.726 | -15.354 | 1.00 | 0.00 |
| ATOM | 764 | CD1  | ILE | 48 | -18.258 | -3.093 | -13.514 | 1.00 | 0.00 |
| ATOM | 765 | HD11 | ILE | 48 | -18.010 | -2.469 | -12.655 | 1.00 | 0.00 |
| ATOM | 766 | HD12 | ILE | 48 | -19.143 | -2.694 | -14.009 | 1.00 | 0.00 |
| ATOM | 767 | HD13 | ILE | 48 | -18.458 | -4.111 | -13.177 | 1.00 | 0.00 |
| ATOM | 768 | C    | ILE | 48 | -13.481 | -4.410 | -14.129 | 1.00 | 0.00 |
| ATOM | 769 | O    | ILE | 48 | -12.526 | -3.714 | -13.849 | 1.00 | 0.00 |
| ATOM | 770 | N    | ARG | 49 | -13.494 | -5.686 | -13.850 | 1.00 | 0.00 |
| ATOM | 771 | H    | ARG | 49 | -14.284 | -6.272 | -14.080 | 1.00 | 0.00 |
| ATOM | 772 | CA   | ARG | 49 | -12.323 | -6.313 | -13.177 | 1.00 | 0.00 |
| ATOM | 773 | HA   | ARG | 49 | -11.463 | -5.644 | -13.212 | 1.00 | 0.00 |
| ATOM | 774 | CB   | ARG | 49 | -12.665 | -6.593 | -11.712 | 1.00 | 0.00 |
| ATOM | 775 | HB2  | ARG | 49 | -13.550 | -7.228 | -11.659 | 1.00 | 0.00 |
| ATOM | 776 | HB3  | ARG | 49 | -11.827 | -7.099 | -11.233 | 1.00 | 0.00 |
| ATOM | 777 | CG   | ARG | 49 | -12.942 | -5.271 | -10.992 | 1.00 | 0.00 |
| ATOM | 778 | HG2  | ARG | 49 | -13.700 | -4.711 | -11.539 | 1.00 | 0.00 |
| ATOM | 779 | HG3  | ARG | 49 | -13.298 | -5.475 | -9.982  | 1.00 | 0.00 |

|      |     |      |     |    |         |         |         |      |      |
|------|-----|------|-----|----|---------|---------|---------|------|------|
| ATOM | 780 | CD   | ARG | 49 | -11.653 | -4.449  | -10.922 | 1.00 | 0.00 |
| ATOM | 781 | HD2  | ARG | 49 | -10.856 | -5.035  | -10.462 | 1.00 | 0.00 |
| ATOM | 782 | HD3  | ARG | 49 | -11.346 | -4.142  | -11.922 | 1.00 | 0.00 |
| ATOM | 783 | NE   | ARG | 49 | -11.886 | -3.230  | -10.098 | 1.00 | 0.00 |
| ATOM | 784 | HE   | ARG | 49 | -12.797 | -3.016  | -9.719  | 1.00 | 0.00 |
| ATOM | 785 | CZ   | ARG | 49 | -10.901 | -2.411  | -9.851  | 1.00 | 0.00 |
| ATOM | 786 | NH1  | ARG | 49 | -9.671  | -2.782  | -10.079 | 1.00 | 0.00 |
| ATOM | 787 | HH11 | ARG | 49 | -9.485  | -3.704  | -10.447 | 1.00 | 0.00 |
| ATOM | 788 | HH12 | ARG | 49 | -8.911  | -2.146  | -9.887  | 1.00 | 0.00 |
| ATOM | 789 | NH2  | ARG | 49 | -11.146 | -1.220  | -9.376  | 1.00 | 0.00 |
| ATOM | 790 | HH21 | ARG | 49 | -12.099 | -0.936  | -9.201  | 1.00 | 0.00 |
| ATOM | 791 | HH22 | ARG | 49 | -10.381 | -0.589  | -9.186  | 1.00 | 0.00 |
| ATOM | 792 | C    | ARG | 49 | -11.975 | -7.628  | -13.879 | 1.00 | 0.00 |
| ATOM | 793 | O    | ARG | 49 | -12.842 | -8.346  | -14.336 | 1.00 | 0.00 |
| ATOM | 794 | N    | SER | 50 | -10.713 | -7.947  | -13.970 | 1.00 | 0.00 |
| ATOM | 795 | H    | SER | 50 | -9.987  | -7.355  | -13.594 | 1.00 | 0.00 |
| ATOM | 796 | CA   | SER | 50 | -10.312 | -9.214  | -14.643 | 1.00 | 0.00 |
| ATOM | 797 | HA   | SER | 50 | -10.563 | -9.176  | -15.703 | 1.00 | 0.00 |
| ATOM | 798 | CB   | SER | 50 | -8.800  | -9.407  | -14.505 | 1.00 | 0.00 |
| ATOM | 799 | HB2  | SER | 50 | -8.543  | -9.527  | -13.453 | 1.00 | 0.00 |
| ATOM | 800 | HB3  | SER | 50 | -8.494  | -10.297 | -15.057 | 1.00 | 0.00 |
| ATOM | 801 | OG   | SER | 50 | -8.129  | -8.272  | -15.029 | 1.00 | 0.00 |

|      |     |      |     |    |         |         |         |      |      |
|------|-----|------|-----|----|---------|---------|---------|------|------|
| ATOM | 802 | HG   | SER | 50 | -7.180  | -8.393  | -14.943 | 1.00 | 0.00 |
| ATOM | 803 | C    | SER | 50 | -11.039 | -10.392 | -13.990 | 1.00 | 0.00 |
| ATOM | 804 | O    | SER | 50 | -11.481 | -11.307 | -14.657 | 1.00 | 0.00 |
| ATOM | 805 | N    | THR | 51 | -11.166 | -10.377 | -12.692 | 1.00 | 0.00 |
| ATOM | 806 | H    | THR | 51 | -10.801 | -9.621  | -12.132 | 1.00 | 0.00 |
| ATOM | 807 | CA   | THR | 51 | -11.864 | -11.496 | -11.999 | 1.00 | 0.00 |
| ATOM | 808 | HA   | THR | 51 | -12.562 | -11.988 | -12.676 | 1.00 | 0.00 |
| ATOM | 809 | CB   | THR | 51 | -10.835 | -12.525 | -11.527 | 1.00 | 0.00 |
| ATOM | 810 | HB   | THR | 51 | -10.172 | -12.781 | -12.354 | 1.00 | 0.00 |
| ATOM | 811 | CG2  | THR | 51 | -10.014 | -11.940 | -10.378 | 1.00 | 0.00 |
| ATOM | 812 | HG21 | THR | 51 | -10.676 | -11.685 | -9.551  | 1.00 | 0.00 |
| ATOM | 813 | HG22 | THR | 51 | -9.281  | -12.675 | -10.043 | 1.00 | 0.00 |
| ATOM | 814 | HG23 | THR | 51 | -9.498  | -11.043 | -10.720 | 1.00 | 0.00 |
| ATOM | 815 | OG1  | THR | 51 | -11.506 | -13.697 | -11.084 | 1.00 | 0.00 |
| ATOM | 816 | HG1  | THR | 51 | -10.860 | -14.343 | -10.788 | 1.00 | 0.00 |
| ATOM | 817 | C    | THR | 51 | -12.630 | -10.951 | -10.792 | 1.00 | 0.00 |
| ATOM | 818 | O    | THR | 51 | -12.304 | -9.910  | -10.257 | 1.00 | 0.00 |
| ATOM | 819 | N    | ARG | 52 | -13.646 | -11.646 | -10.359 | 1.00 | 0.00 |
| ATOM | 820 | H    | ARG | 52 | -13.922 | -12.513 | -10.798 | 1.00 | 0.00 |
| ATOM | 821 | CA   | ARG | 52 | -14.432 | -11.166 | -9.187  | 1.00 | 0.00 |
| ATOM | 822 | HA   | ARG | 52 | -14.846 | -10.179 | -9.389  | 1.00 | 0.00 |
| ATOM | 823 | CB   | ARG | 52 | -15.585 | -12.134 | -8.915  | 1.00 | 0.00 |

|      |     |          |    |         |         |         |      |      |
|------|-----|----------|----|---------|---------|---------|------|------|
| ATOM | 824 | HB2 ARG  | 52 | -15.191 | -13.143 | -8.786  | 1.00 | 0.00 |
| ATOM | 825 | HB3 ARG  | 52 | -16.109 | -11.831 | -8.009  | 1.00 | 0.00 |
| ATOM | 826 | CG ARG   | 52 | -16.556 | -12.114 | -10.097 | 1.00 | 0.00 |
| ATOM | 827 | HG2 ARG  | 52 | -16.872 | -11.089 | -10.291 | 1.00 | 0.00 |
| ATOM | 828 | HG3 ARG  | 52 | -16.061 | -12.516 | -10.982 | 1.00 | 0.00 |
| ATOM | 829 | CD ARG   | 52 | -17.781 | -12.971 | -9.765  | 1.00 | 0.00 |
| ATOM | 830 | HD2 ARG  | 52 | -18.313 | -12.555 | -8.910  | 1.00 | 0.00 |
| ATOM | 831 | HD3 ARG  | 52 | -18.452 | -13.019 | -10.622 | 1.00 | 0.00 |
| ATOM | 832 | NE ARG   | 52 | -17.341 | -14.353 | -9.426  | 1.00 | 0.00 |
| ATOM | 833 | HE ARG   | 52 | -16.424 | -14.538 | -9.045  | 1.00 | 0.00 |
| ATOM | 834 | CZ ARG   | 52 | -18.149 | -15.360 | -9.620  | 1.00 | 0.00 |
| ATOM | 835 | NH1 ARG  | 52 | -18.553 | -16.077 | -8.607  | 1.00 | 0.00 |
| ATOM | 836 | HH11 ARG | 52 | -18.238 | -15.851 | -7.674  | 1.00 | 0.00 |
| ATOM | 837 | HH12 ARG | 52 | -19.178 | -16.856 | -8.761  | 1.00 | 0.00 |
| ATOM | 838 | NH2 ARG  | 52 | -18.552 | -15.649 | -10.826 | 1.00 | 0.00 |
| ATOM | 839 | HH21 ARG | 52 | -18.237 | -15.092 | -11.607 | 1.00 | 0.00 |
| ATOM | 840 | HH22 ARG | 52 | -19.177 | -16.429 | -10.973 | 1.00 | 0.00 |
| ATOM | 841 | C ARG    | 52 | -13.525 | -11.097 | -7.957  | 1.00 | 0.00 |
| ATOM | 842 | O ARG    | 52 | -13.688 | -10.249 | -7.102  | 1.00 | 0.00 |
| ATOM | 843 | N SER    | 53 | -12.571 | -11.981 | -7.860  | 1.00 | 0.00 |
| ATOM | 844 | H SER    | 53 | -12.431 | -12.689 | -8.567  | 1.00 | 0.00 |
| ATOM | 845 | CA SER   | 53 | -11.655 | -11.966 | -6.685  | 1.00 | 0.00 |

|      |     |     |     |    |         |         |        |      |      |
|------|-----|-----|-----|----|---------|---------|--------|------|------|
| ATOM | 846 | HA  | SER | 53 | -12.218 | -12.119 | -5.765 | 1.00 | 0.00 |
| ATOM | 847 | CB  | SER | 53 | -10.629 | -13.093 | -6.822 | 1.00 | 0.00 |
| ATOM | 848 | HB2 | SER | 53 | -10.069 | -13.192 | -5.892 | 1.00 | 0.00 |
| ATOM | 849 | HB3 | SER | 53 | -11.143 | -14.030 | -7.037 | 1.00 | 0.00 |
| ATOM | 850 | OG  | SER | 53 | -9.734  | -12.791 | -7.883 | 1.00 | 0.00 |
| ATOM | 851 | HG  | SER | 53 | -9.090  | -13.498 | -7.969 | 1.00 | 0.00 |
| ATOM | 852 | C   | SER | 53 | -10.931 | -10.620 | -6.620 | 1.00 | 0.00 |
| ATOM | 853 | O   | SER | 53 | -10.432 | -10.222 | -5.585 | 1.00 | 0.00 |
| ATOM | 854 | N   | SER | 54 | -10.867 | -9.915  | -7.716 | 1.00 | 0.00 |
| ATOM | 855 | H   | SER | 54 | -11.279 | -10.240 | -8.579 | 1.00 | 0.00 |
| ATOM | 856 | CA  | SER | 54 | -10.174 | -8.596  | -7.716 | 1.00 | 0.00 |
| ATOM | 857 | HA  | SER | 54 | -9.107  | -8.730  | -7.536 | 1.00 | 0.00 |
| ATOM | 858 | CB  | SER | 54 | -10.360 | -7.921  | -9.076 | 1.00 | 0.00 |
| ATOM | 859 | HB2 | SER | 54 | -10.041 | -8.601  | -9.866 | 1.00 | 0.00 |
| ATOM | 860 | HB3 | SER | 54 | -11.411 | -7.669  | -9.216 | 1.00 | 0.00 |
| ATOM | 861 | OG  | SER | 54 | -9.579  | -6.737  | -9.128 | 1.00 | 0.00 |
| ATOM | 862 | HG  | SER | 54 | -9.696  | -6.314  | -9.982 | 1.00 | 0.00 |
| ATOM | 863 | C   | SER | 54 | -10.768 | -7.708  | -6.621 | 1.00 | 0.00 |
| ATOM | 864 | O   | SER | 54 | -10.085 | -6.897  | -6.028 | 1.00 | 0.00 |
| ATOM | 865 | N   | ASP | 55 | -12.035 | -7.853  | -6.349 | 1.00 | 0.00 |
| ATOM | 866 | H   | ASP | 55 | -12.609 | -8.524  | -6.839 | 1.00 | 0.00 |
| ATOM | 867 | CA  | ASP | 55 | -12.671 | -7.016  | -5.292 | 1.00 | 0.00 |

|      |     |     |     |    |         |         |        |      |      |
|------|-----|-----|-----|----|---------|---------|--------|------|------|
| ATOM | 868 | HA  | ASP | 55 | -12.569 | -5.959  | -5.535 | 1.00 | 0.00 |
| ATOM | 869 | CB  | ASP | 55 | -14.160 | -7.356  | -5.200 | 1.00 | 0.00 |
| ATOM | 870 | HB2 | ASP | 55 | -14.280 | -8.433  | -5.081 | 1.00 | 0.00 |
| ATOM | 871 | HB3 | ASP | 55 | -14.597 | -6.846  | -4.342 | 1.00 | 0.00 |
| ATOM | 872 | CG  | ASP | 55 | -14.868 | -6.902  | -6.478 | 1.00 | 0.00 |
| ATOM | 873 | OD1 | ASP | 55 | -14.255 | -6.179  | -7.246 | 1.00 | 0.00 |
| ATOM | 874 | OD2 | ASP | 55 | -16.011 | -7.285  | -6.667 | 1.00 | 0.00 |
| ATOM | 875 | C   | ASP | 55 | -12.000 | -7.295  | -3.946 | 1.00 | 0.00 |
| ATOM | 876 | O   | ASP | 55 | -11.998 | -6.465  | -3.059 | 1.00 | 0.00 |
| ATOM | 877 | N   | GLN | 56 | -11.429 | -8.458  | -3.787 | 1.00 | 0.00 |
| ATOM | 878 | H   | GLN | 56 | -11.426 | -9.153  | -4.520 | 1.00 | 0.00 |
| ATOM | 879 | CA  | GLN | 56 | -10.758 | -8.788  | -2.498 | 1.00 | 0.00 |
| ATOM | 880 | HA  | GLN | 56 | -11.460 | -8.692  | -1.670 | 1.00 | 0.00 |
| ATOM | 881 | CB  | GLN | 56 | -10.250 | -10.230 | -2.543 | 1.00 | 0.00 |
| ATOM | 882 | HB2 | GLN | 56 | -9.532  | -10.338 | -3.357 | 1.00 | 0.00 |
| ATOM | 883 | HB3 | GLN | 56 | -9.765  | -10.475 | -1.598 | 1.00 | 0.00 |
| ATOM | 884 | CG  | GLN | 56 | -11.427 | -11.180 | -2.773 | 1.00 | 0.00 |
| ATOM | 885 | HG2 | GLN | 56 | -12.267 | -10.904 | -2.136 | 1.00 | 0.00 |
| ATOM | 886 | HG3 | GLN | 56 | -11.738 | -11.150 | -3.817 | 1.00 | 0.00 |
| ATOM | 887 | CD  | GLN | 56 | -11.003 | -12.610 | -2.431 | 1.00 | 0.00 |
| ATOM | 888 | OE1 | GLN | 56 | -11.786 | -13.381 | -1.914 | 1.00 | 0.00 |
| ATOM | 889 | NE2 | GLN | 56 | -9.787  | -12.999 | -2.701 | 1.00 | 0.00 |

|      |     |      |     |    |        |         |        |      |      |
|------|-----|------|-----|----|--------|---------|--------|------|------|
| ATOM | 890 | HE21 | GLN | 56 | -9.500 | -13.942 | -2.478 | 1.00 | 0.00 |
| ATOM | 891 | HE22 | GLN | 56 | -9.138 | -12.356 | -3.132 | 1.00 | 0.00 |
| ATOM | 892 | C    | GLN | 56 | -9.578 | -7.840  | -2.277 | 1.00 | 0.00 |
| ATOM | 893 | O    | GLN | 56 | -9.275 | -7.460  | -1.164 | 1.00 | 0.00 |
| ATOM | 894 | N    | GLN | 57 | -8.910 | -7.455  | -3.330 | 1.00 | 0.00 |
| ATOM | 895 | H    | GLN | 57 | -9.156 | -7.768  | -4.258 | 1.00 | 0.00 |
| ATOM | 896 | CA   | GLN | 57 | -7.749 | -6.533  | -3.180 | 1.00 | 0.00 |
| ATOM | 897 | HA   | GLN | 57 | -6.903 | -7.059  | -2.736 | 1.00 | 0.00 |
| ATOM | 898 | CB   | GLN | 57 | -7.332 | -6.010  | -4.556 | 1.00 | 0.00 |
| ATOM | 899 | HB2  | GLN | 57 | -8.178 | -5.513  | -5.029 | 1.00 | 0.00 |
| ATOM | 900 | HB3  | GLN | 57 | -6.511 | -5.302  | -4.444 | 1.00 | 0.00 |
| ATOM | 901 | CG   | GLN | 57 | -6.878 | -7.182  | -5.428 | 1.00 | 0.00 |
| ATOM | 902 | HG2  | GLN | 57 | -5.990 | -7.649  | -5.002 | 1.00 | 0.00 |
| ATOM | 903 | HG3  | GLN | 57 | -7.673 | -7.923  | -5.510 | 1.00 | 0.00 |
| ATOM | 904 | CD   | GLN | 57 | -6.538 | -6.673  | -6.830 | 1.00 | 0.00 |
| ATOM | 905 | OE1  | GLN | 57 | -6.932 | -5.588  | -7.208 | 1.00 | 0.00 |
| ATOM | 906 | NE2  | GLN | 57 | -5.816 | -7.418  | -7.623 | 1.00 | 0.00 |
| ATOM | 907 | HE21 | GLN | 57 | -5.587 | -7.090  | -8.550 | 1.00 | 0.00 |
| ATOM | 908 | HE22 | GLN | 57 | -5.489 | -8.320  | -7.306 | 1.00 | 0.00 |
| ATOM | 909 | C    | GLN | 57 | -8.144 | -5.357  | -2.283 | 1.00 | 0.00 |
| ATOM | 910 | O    | GLN | 57 | -7.415 | -4.972  | -1.391 | 1.00 | 0.00 |
| ATOM | 911 | N    | GLN | 58 | -9.293 | -4.782  | -2.513 | 1.00 | 0.00 |

|      |     |      |     |    |         |        |        |      |      |
|------|-----|------|-----|----|---------|--------|--------|------|------|
| ATOM | 912 | H    | GLN | 58 | -9.905  | -5.097 | -3.252 | 1.00 | 0.00 |
| ATOM | 913 | CA   | GLN | 58 | -9.732  | -3.633 | -1.674 | 1.00 | 0.00 |
| ATOM | 914 | HA   | GLN | 58 | -9.150  | -2.744 | -1.917 | 1.00 | 0.00 |
| ATOM | 915 | CB   | GLN | 58 | -11.210 | -3.339 | -1.942 | 1.00 | 0.00 |
| ATOM | 916 | HB2  | GLN | 58 | -11.811 | -4.200 | -1.648 | 1.00 | 0.00 |
| ATOM | 917 | HB3  | GLN | 58 | -11.518 | -2.468 | -1.365 | 1.00 | 0.00 |
| ATOM | 918 | CG   | GLN | 58 | -11.413 | -3.061 | -3.433 | 1.00 | 0.00 |
| ATOM | 919 | HG2  | GLN | 58 | -10.630 | -2.401 | -3.807 | 1.00 | 0.00 |
| ATOM | 920 | HG3  | GLN | 58 | -11.400 | -3.994 | -3.997 | 1.00 | 0.00 |
| ATOM | 921 | CD   | GLN | 58 | -12.768 | -2.381 | -3.643 | 1.00 | 0.00 |
| ATOM | 922 | OE1  | GLN | 58 | -12.910 | -1.539 | -4.507 | 1.00 | 0.00 |
| ATOM | 923 | NE2  | GLN | 58 | -13.776 | -2.714 | -2.885 | 1.00 | 0.00 |
| ATOM | 924 | HE21 | GLN | 58 | -14.673 | -2.270 | -3.018 | 1.00 | 0.00 |
| ATOM | 925 | HE22 | GLN | 58 | -13.655 | -3.416 | -2.168 | 1.00 | 0.00 |
| ATOM | 926 | C    | GLN | 58 | -9.544  | -3.980 | -0.196 | 1.00 | 0.00 |
| ATOM | 927 | O    | GLN | 58 | -9.112  | -3.163 | 0.593  | 1.00 | 0.00 |
| ATOM | 928 | N    | ARG | 59 | -9.866  | -5.186 | 0.186  | 1.00 | 0.00 |
| ATOM | 929 | H    | ARG | 59 | -10.226 | -5.871 | -0.464 | 1.00 | 0.00 |
| ATOM | 930 | CA   | ARG | 59 | -9.708  | -5.582 | 1.613  | 1.00 | 0.00 |
| ATOM | 931 | HA   | ARG | 59 | -10.444 | -5.069 | 2.232  | 1.00 | 0.00 |
| ATOM | 932 | CB   | ARG | 59 | -9.921  | -7.091 | 1.750  | 1.00 | 0.00 |
| ATOM | 933 | HB2  | ARG | 59 | -9.192  | -7.620 | 1.135  | 1.00 | 0.00 |



|      |     |      |     |    |         |         |        |      |      |
|------|-----|------|-----|----|---------|---------|--------|------|------|
| ATOM | 934 | HB3  | ARG | 59 | -9.796  | -7.384  | 2.793  | 1.00 | 0.00 |
| ATOM | 935 | CG   | ARG | 59 | -11.334 | -7.449  | 1.286  | 1.00 | 0.00 |
| ATOM | 936 | HG2  | ARG | 59 | -12.063 | -6.895  | 1.877  | 1.00 | 0.00 |
| ATOM | 937 | HG3  | ARG | 59 | -11.448 | -7.190  | 0.233  | 1.00 | 0.00 |
| ATOM | 938 | CD   | ARG | 59 | -11.565 | -8.951  | 1.469  | 1.00 | 0.00 |
| ATOM | 939 | HD2  | ARG | 59 | -10.776 | -9.518  | 0.975  | 1.00 | 0.00 |
| ATOM | 940 | HD3  | ARG | 59 | -11.584 | -9.205  | 2.529  | 1.00 | 0.00 |
| ATOM | 941 | NE   | ARG | 59 | -12.874 | -9.328  | 0.864  | 1.00 | 0.00 |
| ATOM | 942 | HE   | ARG | 59 | -12.967 | -9.506  | -0.126 | 1.00 | 0.00 |
| ATOM | 943 | CZ   | ARG | 59 | -13.934 | -9.436  | 1.619  | 1.00 | 0.00 |
| ATOM | 944 | NH1  | ARG | 59 | -14.233 | -10.583 | 2.164  | 1.00 | 0.00 |
| ATOM | 945 | HH11 | ARG | 59 | -13.642 | -11.386 | 2.000  | 1.00 | 0.00 |
| ATOM | 946 | HH12 | ARG | 59 | -15.053 | -10.663 | 2.747  | 1.00 | 0.00 |
| ATOM | 947 | NH2  | ARG | 59 | -14.694 | -8.395  | 1.828  | 1.00 | 0.00 |
| ATOM | 948 | HH21 | ARG | 59 | -14.459 | -7.509  | 1.404  | 1.00 | 0.00 |
| ATOM | 949 | HH22 | ARG | 59 | -15.513 | -8.481  | 2.412  | 1.00 | 0.00 |
| ATOM | 950 | C    | ARG | 59 | -8.303  | -5.218  | 2.092  | 1.00 | 0.00 |
| ATOM | 951 | O    | ARG | 59 | -8.089  | -4.925  | 3.251  | 1.00 | 0.00 |
| ATOM | 952 | N    | CYX | 60 | -7.343  | -5.227  | 1.210  | 1.00 | 0.00 |
| ATOM | 953 | H    | CYX | 60 | -7.510  | -5.467  | 0.243  | 1.00 | 0.00 |
| ATOM | 954 | CA   | CYX | 60 | -5.955  | -4.875  | 1.620  | 1.00 | 0.00 |
| ATOM | 955 | HA   | CYX | 60 | -5.505  | -5.695  | 2.181  | 1.00 | 0.00 |

|      |     |     |     |    |         |        |        |      |      |
|------|-----|-----|-----|----|---------|--------|--------|------|------|
| ATOM | 956 | CB  | CYX | 60 | -5.108  | -4.614 | 0.371  | 1.00 | 0.00 |
| ATOM | 957 | HB2 | CYX | 60 | -4.857  | -5.563 | -0.104 | 1.00 | 0.00 |
| ATOM | 958 | HB3 | CYX | 60 | -5.671  | -3.996 | -0.328 | 1.00 | 0.00 |
| ATOM | 959 | SG  | CYX | 60 | -3.550  | -3.822 | 0.843  | 1.00 | 0.00 |
| ATOM | 960 | C   | CYX | 60 | -5.997  | -3.615 | 2.487  | 1.00 | 0.00 |
| ATOM | 961 | O   | CYX | 60 | -6.085  | -3.684 | 3.698  | 1.00 | 0.00 |
| ATOM | 962 | N   | CYX | 61 | -5.935  | -2.467 | 1.875  | 1.00 | 0.00 |
| ATOM | 963 | H   | CYX | 61 | -5.858  | -2.404 | 0.870  | 1.00 | 0.00 |
| ATOM | 964 | CA  | CYX | 61 | -5.973  | -1.202 | 2.662  | 1.00 | 0.00 |
| ATOM | 965 | HA  | CYX | 61 | -5.001  | -1.015 | 3.120  | 1.00 | 0.00 |
| ATOM | 966 | CB  | CYX | 61 | -6.313  | -0.031 | 1.739  | 1.00 | 0.00 |
| ATOM | 967 | HB2 | CYX | 61 | -6.391  | -0.388 | 0.712  | 1.00 | 0.00 |
| ATOM | 968 | HB3 | CYX | 61 | -7.262  | 0.408  | 2.044  | 1.00 | 0.00 |
| ATOM | 969 | SG  | CYX | 61 | -4.979  | 1.192  | 1.802  | 1.00 | 0.00 |
| ATOM | 970 | C   | CYX | 61 | -7.037  | -1.319 | 3.756  | 1.00 | 0.00 |
| ATOM | 971 | O   | CYX | 61 | -6.850  | -0.868 | 4.868  | 1.00 | 0.00 |
| ATOM | 972 | N   | ASP | 62 | -8.151  | -1.923 | 3.447  | 1.00 | 0.00 |
| ATOM | 973 | H   | ASP | 62 | -8.312  | -2.301 | 2.524  | 1.00 | 0.00 |
| ATOM | 974 | CA  | ASP | 62 | -9.227  | -2.069 | 4.469  | 1.00 | 0.00 |
| ATOM | 975 | HA  | ASP | 62 | -9.557  | -1.089 | 4.812  | 1.00 | 0.00 |
| ATOM | 976 | CB  | ASP | 62 | -10.421 | -2.799 | 3.853  | 1.00 | 0.00 |
| ATOM | 977 | HB2 | ASP | 62 | -10.090 | -3.749 | 3.433  | 1.00 | 0.00 |

|      |     |     |     |    |         |        |       |      |      |
|------|-----|-----|-----|----|---------|--------|-------|------|------|
| ATOM | 978 | HB3 | ASP | 62 | -11.170 | -2.984 | 4.622 | 1.00 | 0.00 |
| ATOM | 979 | CG  | ASP | 62 | -11.030 | -1.937 | 2.745 | 1.00 | 0.00 |
| ATOM | 980 | OD1 | ASP | 62 | -10.676 | -0.771 | 2.667 | 1.00 | 0.00 |
| ATOM | 981 | OD2 | ASP | 62 | -11.839 | -2.455 | 1.993 | 1.00 | 0.00 |
| ATOM | 982 | C   | ASP | 62 | -8.696  | -2.872 | 5.656 | 1.00 | 0.00 |
| ATOM | 983 | O   | ASP | 62 | -9.026  | -2.608 | 6.796 | 1.00 | 0.00 |
| ATOM | 984 | N   | GLU | 63 | -7.872  | -3.848 | 5.400 | 1.00 | 0.00 |
| ATOM | 985 | H   | GLU | 63 | -7.593  | -4.075 | 4.456 | 1.00 | 0.00 |
| ATOM | 986 | CA  | GLU | 63 | -7.315  | -4.663 | 6.515 | 1.00 | 0.00 |
| ATOM | 987 | HA  | GLU | 63 | -8.122  | -5.095 | 7.107 | 1.00 | 0.00 |
| ATOM | 988 | CB  | GLU | 63 | -6.466  | -5.800 | 5.943 | 1.00 | 0.00 |
| ATOM | 989 | HB2 | GLU | 63 | -5.862  | -5.423 | 5.117 | 1.00 | 0.00 |
| ATOM | 990 | HB3 | GLU | 63 | -5.811  | -6.192 | 6.721 | 1.00 | 0.00 |
| ATOM | 991 | CG  | GLU | 63 | -7.381  | -6.916 | 5.437 | 1.00 | 0.00 |
| ATOM | 992 | HG2 | GLU | 63 | -8.058  | -7.221 | 6.235 | 1.00 | 0.00 |
| ATOM | 993 | HG3 | GLU | 63 | -7.961  | -6.554 | 4.588 | 1.00 | 0.00 |
| ATOM | 994 | CD  | GLU | 63 | -6.534  | -8.113 | 5.002 | 1.00 | 0.00 |
| ATOM | 995 | OE1 | GLU | 63 | -5.322  | -8.031 | 5.122 | 1.00 | 0.00 |
| ATOM | 996 | OE2 | GLU | 63 | -7.111  | -9.092 | 4.556 | 1.00 | 0.00 |
| ATOM | 997 | C   | GLU | 63 | -6.447  | -3.770 | 7.402 | 1.00 | 0.00 |
| ATOM | 998 | O   | GLU | 63 | -6.589  | -3.748 | 8.608 | 1.00 | 0.00 |
| ATOM | 999 | N   | LEU | 64 | -5.548  | -3.032 | 6.811 | 1.00 | 0.00 |

|      |      |      |     |    |        |        |       |      |      |
|------|------|------|-----|----|--------|--------|-------|------|------|
| ATOM | 1000 | H    | LEU | 64 | -5.427 | -3.048 | 5.808 | 1.00 | 0.00 |
| ATOM | 1001 | CA   | LEU | 64 | -4.668 | -2.138 | 7.614 | 1.00 | 0.00 |
| ATOM | 1002 | HA   | LEU | 64 | -4.193 | -2.698 | 8.420 | 1.00 | 0.00 |
| ATOM | 1003 | CB   | LEU | 64 | -3.576 | -1.556 | 6.713 | 1.00 | 0.00 |
| ATOM | 1004 | HB2  | LEU | 64 | -4.026 | -0.890 | 5.978 | 1.00 | 0.00 |
| ATOM | 1005 | HB3  | LEU | 64 | -2.863 | -0.998 | 7.321 | 1.00 | 0.00 |
| ATOM | 1006 | CG   | LEU | 64 | -2.850 | -2.693 | 5.992 | 1.00 | 0.00 |
| ATOM | 1007 | HG   | LEU | 64 | -3.541 | -3.196 | 5.315 | 1.00 | 0.00 |
| ATOM | 1008 | CD1  | LEU | 64 | -1.678 | -2.121 | 5.191 | 1.00 | 0.00 |
| ATOM | 1009 | HD11 | LEU | 64 | -0.986 | -1.619 | 5.867 | 1.00 | 0.00 |
| ATOM | 1010 | HD12 | LEU | 64 | -1.159 | -2.931 | 4.677 | 1.00 | 0.00 |
| ATOM | 1011 | HD13 | LEU | 64 | -2.052 | -1.407 | 4.458 | 1.00 | 0.00 |
| ATOM | 1012 | CD2  | LEU | 64 | -2.322 | -3.696 | 7.019 | 1.00 | 0.00 |
| ATOM | 1013 | HD21 | LEU | 64 | -3.155 | -4.104 | 7.591 | 1.00 | 0.00 |
| ATOM | 1014 | HD22 | LEU | 64 | -1.805 | -4.506 | 6.504 | 1.00 | 0.00 |
| ATOM | 1015 | HD23 | LEU | 64 | -1.629 | -3.195 | 7.694 | 1.00 | 0.00 |
| ATOM | 1016 | C    | LEU | 64 | -5.495 | -0.995 | 8.211 | 1.00 | 0.00 |
| ATOM | 1017 | O    | LEU | 64 | -4.984 | -0.158 | 8.927 | 1.00 | 0.00 |
| ATOM | 1018 | N    | ASN | 65 | -6.769 | -0.951 | 7.925 | 1.00 | 0.00 |
| ATOM | 1019 | H    | ASN | 65 | -7.205 | -1.643 | 7.333 | 1.00 | 0.00 |
| ATOM | 1020 | CA   | ASN | 65 | -7.619 | 0.141  | 8.482 | 1.00 | 0.00 |
| ATOM | 1021 | HA   | ASN | 65 | -6.994 | 0.953  | 8.854 | 1.00 | 0.00 |

|      |      |      |     |    |         |        |        |      |      |
|------|------|------|-----|----|---------|--------|--------|------|------|
| ATOM | 1022 | CB   | ASN | 65 | -8.531  | 0.690  | 7.383  | 1.00 | 0.00 |
| ATOM | 1023 | HB2  | ASN | 65 | -9.217  | -0.086 | 7.042  | 1.00 | 0.00 |
| ATOM | 1024 | HB3  | ASN | 65 | -9.101  | 1.541  | 7.755  | 1.00 | 0.00 |
| ATOM | 1025 | CG   | ASN | 65 | -7.685  | 1.150  | 6.197  | 1.00 | 0.00 |
| ATOM | 1026 | OD1  | ASN | 65 | -8.201  | 1.137  | 4.998  | 1.00 | 0.00 |
| ATOM | 1027 | ND2  | ASN | 65 | -6.540  | 1.525  | 6.360  | 1.00 | 0.00 |
| ATOM | 1028 | HD21 | ASN | 65 | -5.992  | 1.826  | 5.566  | 1.00 | 0.00 |
| ATOM | 1029 | HD22 | ASN | 65 | -6.142  | 1.533  | 7.288  | 1.00 | 0.00 |
| ATOM | 1030 | C    | ASN | 65 | -8.478  | -0.409 | 9.623  | 1.00 | 0.00 |
| ATOM | 1031 | O    | ASN | 65 | -9.118  | 0.332  | 10.341 | 1.00 | 0.00 |
| ATOM | 1032 | N    | GLU | 66 | -8.500  | -1.703 | 9.795  | 1.00 | 0.00 |
| ATOM | 1033 | H    | GLU | 66 | -7.971  | -2.329 | 9.204  | 1.00 | 0.00 |
| ATOM | 1034 | CA   | GLU | 66 | -9.324  | -2.292 | 10.890 | 1.00 | 0.00 |
| ATOM | 1035 | HA   | GLU | 66 | -9.499  | -1.554 | 11.672 | 1.00 | 0.00 |
| ATOM | 1036 | CB   | GLU | 66 | -10.675 | -2.735 | 10.325 | 1.00 | 0.00 |
| ATOM | 1037 | HB2  | GLU | 66 | -10.524 | -3.556 | 9.624  | 1.00 | 0.00 |
| ATOM | 1038 | HB3  | GLU | 66 | -11.318 | -3.068 | 11.140 | 1.00 | 0.00 |
| ATOM | 1039 | CG   | GLU | 66 | -11.336 | -1.561 | 9.601  | 1.00 | 0.00 |
| ATOM | 1040 | HG2  | GLU | 66 | -11.592 | -0.787 | 10.324 | 1.00 | 0.00 |
| ATOM | 1041 | HG3  | GLU | 66 | -10.646 | -1.154 | 8.862  | 1.00 | 0.00 |
| ATOM | 1042 | CD   | GLU | 66 | -12.607 | -2.044 | 8.900  | 1.00 | 0.00 |
| ATOM | 1043 | OE1  | GLU | 66 | -12.795 | -3.248 | 8.822  | 1.00 | 0.00 |

|      |      |     |     |    |         |        |        |      |      |
|------|------|-----|-----|----|---------|--------|--------|------|------|
| ATOM | 1044 | OE2 | GLU | 66 | -13.370 | -1.204 | 8.453  | 1.00 | 0.00 |
| ATOM | 1045 | C   | GLU | 66 | -8.604  | -3.503 | 11.491 | 1.00 | 0.00 |
| ATOM | 1046 | O   | GLU | 66 | -8.725  | -3.787 | 12.665 | 1.00 | 0.00 |
| ATOM | 1047 | N   | MET | 67 | -7.860  | -4.222 | 10.696 | 1.00 | 0.00 |
| ATOM | 1048 | H   | MET | 67 | -7.752  | -3.997 | 9.717  | 1.00 | 0.00 |
| ATOM | 1049 | CA  | MET | 67 | -7.142  | -5.415 | 11.229 | 1.00 | 0.00 |
| ATOM | 1050 | HA  | MET | 67 | -7.807  | -6.008 | 11.857 | 1.00 | 0.00 |
| ATOM | 1051 | CB  | MET | 67 | -6.666  | -6.285 | 10.064 | 1.00 | 0.00 |
| ATOM | 1052 | HB2 | MET | 67 | -6.836  | -5.761 | 9.124  | 1.00 | 0.00 |
| ATOM | 1053 | HB3 | MET | 67 | -5.602  | -6.493 | 10.176 | 1.00 | 0.00 |
| ATOM | 1054 | CG  | MET | 67 | -7.445  | -7.602 | 10.061 | 1.00 | 0.00 |
| ATOM | 1055 | HG2 | MET | 67 | -7.865  | -7.785 | 11.050 | 1.00 | 0.00 |
| ATOM | 1056 | HG3 | MET | 67 | -8.250  | -7.553 | 9.328  | 1.00 | 0.00 |
| ATOM | 1057 | SD  | MET | 67 | -6.330  | -8.960 | 9.628  | 1.00 | 0.00 |
| ATOM | 1058 | CE  | MET | 67 | -6.220  | -8.606 | 7.857  | 1.00 | 0.00 |
| ATOM | 1059 | HE1 | MET | 67 | -5.812  | -7.606 | 7.710  | 1.00 | 0.00 |
| ATOM | 1060 | HE2 | MET | 67 | -5.567  | -9.338 | 7.380  | 1.00 | 0.00 |
| ATOM | 1061 | HE3 | MET | 67 | -7.213  | -8.662 | 7.412  | 1.00 | 0.00 |
| ATOM | 1062 | C   | MET | 67 | -5.937  | -4.963 | 12.053 | 1.00 | 0.00 |
| ATOM | 1063 | O   | MET | 67 | -5.955  | -4.993 | 13.268 | 1.00 | 0.00 |
| ATOM | 1064 | N   | GLU | 68 | -4.889  | -4.547 | 11.402 | 1.00 | 0.00 |
| ATOM | 1065 | H   | GLU | 68 | -4.868  | -4.523 | 10.392 | 1.00 | 0.00 |

|      |      |     |     |    |        |        |        |      |      |
|------|------|-----|-----|----|--------|--------|--------|------|------|
| ATOM | 1066 | CA  | GLU | 68 | -3.679 | -4.095 | 12.144 | 1.00 | 0.00 |
| ATOM | 1067 | HA  | GLU | 68 | -3.473 | -4.767 | 12.978 | 1.00 | 0.00 |
| ATOM | 1068 | CB  | GLU | 68 | -2.473 | -4.101 | 11.203 | 1.00 | 0.00 |
| ATOM | 1069 | HB2 | GLU | 68 | -2.564 | -3.283 | 10.489 | 1.00 | 0.00 |
| ATOM | 1070 | HB3 | GLU | 68 | -1.558 | -3.977 | 11.783 | 1.00 | 0.00 |
| ATOM | 1071 | CG  | GLU | 68 | -2.422 | -5.431 | 10.449 | 1.00 | 0.00 |
| ATOM | 1072 | HG2 | GLU | 68 | -2.217 | -6.240 | 11.151 | 1.00 | 0.00 |
| ATOM | 1073 | HG3 | GLU | 68 | -3.380 | -5.609 | 9.961  | 1.00 | 0.00 |
| ATOM | 1074 | CD  | GLU | 68 | -1.315 | -5.379 | 9.394  | 1.00 | 0.00 |
| ATOM | 1075 | OE1 | GLU | 68 | -0.746 | -4.315 | 9.212  | 1.00 | 0.00 |
| ATOM | 1076 | OE2 | GLU | 68 | -1.054 | -6.405 | 8.786  | 1.00 | 0.00 |
| ATOM | 1077 | C   | GLU | 68 | -3.902 | -2.679 | 12.680 | 1.00 | 0.00 |
| ATOM | 1078 | O   | GLU | 68 | -3.020 | -2.081 | 13.263 | 1.00 | 0.00 |
| ATOM | 1079 | N   | ASN | 69 | -5.074 | -2.138 | 12.489 | 1.00 | 0.00 |
| ATOM | 1080 | H   | ASN | 69 | -5.814 | -2.628 | 12.007 | 1.00 | 0.00 |
| ATOM | 1081 | CA  | ASN | 69 | -5.347 | -0.760 | 12.989 | 1.00 | 0.00 |
| ATOM | 1082 | HA  | ASN | 69 | -6.271 | -0.377 | 12.557 | 1.00 | 0.00 |
| ATOM | 1083 | CB  | ASN | 69 | -5.495 | -0.791 | 14.512 | 1.00 | 0.00 |
| ATOM | 1084 | HB2 | ASN | 69 | -4.561 | -1.110 | 14.976 | 1.00 | 0.00 |
| ATOM | 1085 | HB3 | ASN | 69 | -5.767 | 0.196  | 14.885 | 1.00 | 0.00 |
| ATOM | 1086 | CG  | ASN | 69 | -6.595 | -1.780 | 14.898 | 1.00 | 0.00 |
| ATOM | 1087 | OD1 | ASN | 69 | -7.530 | -1.992 | 14.150 | 1.00 | 0.00 |

|      |      |      |     |    |        |        |        |      |      |
|------|------|------|-----|----|--------|--------|--------|------|------|
| ATOM | 1088 | ND2  | ASN | 69 | -6.524 | -2.401 | 16.044 | 1.00 | 0.00 |
| ATOM | 1089 | HD21 | ASN | 69 | -7.247 | -3.056 | 16.306 | 1.00 | 0.00 |
| ATOM | 1090 | HD22 | ASN | 69 | -5.746 | -2.224 | 16.664 | 1.00 | 0.00 |
| ATOM | 1091 | C    | ASN | 69 | -4.184 | 0.158  | 12.606 | 1.00 | 0.00 |
| ATOM | 1092 | O    | ASN | 69 | -3.927 | 1.152  | 13.256 | 1.00 | 0.00 |
| ATOM | 1093 | N    | THR | 70 | -3.481 | -0.169 | 11.558 | 1.00 | 0.00 |
| ATOM | 1094 | H    | THR | 70 | -3.692 | -0.995 | 11.015 | 1.00 | 0.00 |
| ATOM | 1095 | CA   | THR | 70 | -2.333 | 0.683  | 11.132 | 1.00 | 0.00 |
| ATOM | 1096 | HA   | THR | 70 | -1.466 | 0.499  | 11.766 | 1.00 | 0.00 |
| ATOM | 1097 | CB   | THR | 70 | -1.960 | 0.349  | 9.685  | 1.00 | 0.00 |
| ATOM | 1098 | HB   | THR | 70 | -0.951 | 0.707  | 9.479  | 1.00 | 0.00 |
| ATOM | 1099 | CG2  | THR | 70 | -2.015 | -1.166 | 9.477  | 1.00 | 0.00 |
| ATOM | 1100 | HG21 | THR | 70 | -3.023 | -1.526 | 9.683  | 1.00 | 0.00 |
| ATOM | 1101 | HG22 | THR | 70 | -1.749 | -1.402 | 8.446  | 1.00 | 0.00 |
| ATOM | 1102 | HG23 | THR | 70 | -1.311 | -1.652 | 10.153 | 1.00 | 0.00 |
| ATOM | 1103 | OG1  | THR | 70 | -2.874 | 0.984  | 8.802  | 1.00 | 0.00 |
| ATOM | 1104 | HG1  | THR | 70 | -2.640 | 0.774  | 7.895  | 1.00 | 0.00 |
| ATOM | 1105 | C    | THR | 70 | -2.728 | 2.158  | 11.229 | 1.00 | 0.00 |
| ATOM | 1106 | O    | THR | 70 | -3.894 | 2.500  | 11.236 | 1.00 | 0.00 |
| ATOM | 1107 | N    | GLN | 71 | -1.765 | 3.037  | 11.305 | 1.00 | 0.00 |
| ATOM | 1108 | H    | GLN | 71 | -0.793 | 2.761  | 11.300 | 1.00 | 0.00 |
| ATOM | 1109 | CA   | GLN | 71 | -2.088 | 4.489  | 11.402 | 1.00 | 0.00 |



|      |      |      |     |    |        |       |        |      |      |
|------|------|------|-----|----|--------|-------|--------|------|------|
| ATOM | 1110 | HA   | GLN | 71 | -2.707 | 4.795 | 10.559 | 1.00 | 0.00 |
| ATOM | 1111 | CB   | GLN | 71 | -2.858 | 4.755 | 12.696 | 1.00 | 0.00 |
| ATOM | 1112 | HB2  | GLN | 71 | -3.798 | 4.204 | 12.680 | 1.00 | 0.00 |
| ATOM | 1113 | HB3  | GLN | 71 | -2.261 | 4.430 | 13.548 | 1.00 | 0.00 |
| ATOM | 1114 | CG   | GLN | 71 | -3.147 | 6.254 | 12.817 | 1.00 | 0.00 |
| ATOM | 1115 | HG2  | GLN | 71 | -2.235 | 6.828 | 12.654 | 1.00 | 0.00 |
| ATOM | 1116 | HG3  | GLN | 71 | -3.900 | 6.554 | 12.088 | 1.00 | 0.00 |
| ATOM | 1117 | CD   | GLN | 71 | -3.675 | 6.561 | 14.221 | 1.00 | 0.00 |
| ATOM | 1118 | OE1  | GLN | 71 | -3.074 | 6.181 | 15.206 | 1.00 | 0.00 |
| ATOM | 1119 | NE2  | GLN | 71 | -4.783 | 7.238 | 14.353 | 1.00 | 0.00 |
| ATOM | 1120 | HE21 | GLN | 71 | -5.138 | 7.444 | 15.276 | 1.00 | 0.00 |
| ATOM | 1121 | HE22 | GLN | 71 | -5.280 | 7.552 | 13.532 | 1.00 | 0.00 |
| ATOM | 1122 | C    | GLN | 71 | -0.791 | 5.302 | 11.404 | 1.00 | 0.00 |
| ATOM | 1123 | O    | GLN | 71 | -0.735 | 6.399 | 10.884 | 1.00 | 0.00 |
| ATOM | 1124 | N    | GLY | 72 | 0.251  | 4.776 | 11.989 | 1.00 | 0.00 |
| ATOM | 1125 | H    | GLY | 72 | 0.213  | 3.865 | 12.425 | 1.00 | 0.00 |
| ATOM | 1126 | CA   | GLY | 72 | 1.540  | 5.523 | 12.025 | 1.00 | 0.00 |
| ATOM | 1127 | HA2  | GLY | 72 | 1.382  | 6.551 | 11.699 | 1.00 | 0.00 |
| ATOM | 1128 | HA3  | GLY | 72 | 1.942  | 5.520 | 13.038 | 1.00 | 0.00 |
| ATOM | 1129 | C    | GLY | 72 | 2.548  | 4.853 | 11.088 | 1.00 | 0.00 |
| ATOM | 1130 | O    | GLY | 72 | 2.410  | 3.698 | 10.735 | 1.00 | 0.00 |
| ATOM | 1131 | N    | CYX | 73 | 3.562  | 5.568 | 10.685 | 1.00 | 0.00 |

|      |      |     |     |    |        |       |        |      |      |
|------|------|-----|-----|----|--------|-------|--------|------|------|
| ATOM | 1132 | H   | CYX | 73 | 3.682  | 6.528 | 10.975 | 1.00 | 0.00 |
| ATOM | 1133 | CA  | CYX | 73 | 4.578  | 4.974 | 9.772  | 1.00 | 0.00 |
| ATOM | 1134 | HA  | CYX | 73 | 5.400  | 5.672 | 9.615  | 1.00 | 0.00 |
| ATOM | 1135 | CB  | CYX | 73 | 5.137  | 3.693 | 10.394 | 1.00 | 0.00 |
| ATOM | 1136 | HB2 | CYX | 73 | 4.532  | 3.412 | 11.256 | 1.00 | 0.00 |
| ATOM | 1137 | HB3 | CYX | 73 | 5.113  | 2.890 | 9.657  | 1.00 | 0.00 |
| ATOM | 1138 | SG  | CYX | 73 | 6.827  | 3.988 | 10.973 | 1.00 | 0.00 |
| ATOM | 1139 | C   | CYX | 73 | 3.927  | 4.647 | 8.425  | 1.00 | 0.00 |
| ATOM | 1140 | O   | CYX | 73 | 4.512  | 3.995 | 7.583  | 1.00 | 0.00 |
| ATOM | 1141 | N   | MET | 74 | 2.720  | 5.096 | 8.216  | 1.00 | 0.00 |
| ATOM | 1142 | H   | MET | 74 | 2.229  | 5.639 | 8.911  | 1.00 | 0.00 |
| ATOM | 1143 | CA  | MET | 74 | 2.032  | 4.811 | 6.926  | 1.00 | 0.00 |
| ATOM | 1144 | HA  | MET | 74 | 1.668  | 3.783 | 6.910  | 1.00 | 0.00 |
| ATOM | 1145 | CB  | MET | 74 | 0.838  | 5.756 | 6.765  | 1.00 | 0.00 |
| ATOM | 1146 | HB2 | MET | 74 | 1.195  | 6.781 | 6.668  | 1.00 | 0.00 |
| ATOM | 1147 | HB3 | MET | 74 | 0.274  | 5.482 | 5.873  | 1.00 | 0.00 |
| ATOM | 1148 | CG  | MET | 74 | -0.066 | 5.644 | 7.995  | 1.00 | 0.00 |
| ATOM | 1149 | HG2 | MET | 74 | -0.207 | 4.594 | 8.254  | 1.00 | 0.00 |
| ATOM | 1150 | HG3 | MET | 74 | 0.389  | 6.167 | 8.836  | 1.00 | 0.00 |
| ATOM | 1151 | SD  | MET | 74 | -1.675 | 6.389 | 7.631  | 1.00 | 0.00 |
| ATOM | 1152 | CE  | MET | 74 | -2.545 | 4.859 | 7.209  | 1.00 | 0.00 |
| ATOM | 1153 | HE1 | MET | 74 | -2.529 | 4.183 | 8.065  | 1.00 | 0.00 |

|      |      |         |    |        |       |       |      |      |
|------|------|---------|----|--------|-------|-------|------|------|
| ATOM | 1154 | HE2 MET | 74 | -3.577 | 5.088 | 6.946 | 1.00 | 0.00 |
| ATOM | 1155 | HE3 MET | 74 | -2.052 | 4.382 | 6.362 | 1.00 | 0.00 |
| ATOM | 1156 | C MET   | 74 | 3.013  | 5.024 | 5.771 | 1.00 | 0.00 |
| ATOM | 1157 | O MET   | 74 | 3.239  | 4.142 | 4.966 | 1.00 | 0.00 |
| ATOM | 1158 | N CYX   | 75 | 3.599  | 6.187 | 5.684 | 1.00 | 0.00 |
| ATOM | 1159 | H CYX   | 75 | 3.418  | 6.926 | 6.348 | 1.00 | 0.00 |
| ATOM | 1160 | CA CYX  | 75 | 4.565  | 6.450 | 4.581 | 1.00 | 0.00 |
| ATOM | 1161 | HA CYX  | 75 | 4.036  | 6.573 | 3.636 | 1.00 | 0.00 |
| ATOM | 1162 | CB CYX  | 75 | 5.341  | 7.735 | 4.878 | 1.00 | 0.00 |
| ATOM | 1163 | HB2 CYX | 75 | 4.648  | 8.513 | 5.196 | 1.00 | 0.00 |
| ATOM | 1164 | HB3 CYX | 75 | 6.065  | 7.547 | 5.671 | 1.00 | 0.00 |
| ATOM | 1165 | SG CYX  | 75 | 6.163  | 8.304 | 3.370 | 1.00 | 0.00 |
| ATOM | 1166 | C CYX   | 75 | 5.541  | 5.279 | 4.468 | 1.00 | 0.00 |
| ATOM | 1167 | O CYX   | 75 | 5.750  | 4.733 | 3.402 | 1.00 | 0.00 |
| ATOM | 1168 | N GLU   | 76 | 6.140  | 4.883 | 5.559 | 1.00 | 0.00 |
| ATOM | 1169 | H GLU   | 76 | 5.974  | 5.328 | 6.450 | 1.00 | 0.00 |
| ATOM | 1170 | CA GLU  | 76 | 7.098  | 3.743 | 5.507 | 1.00 | 0.00 |
| ATOM | 1171 | HA GLU  | 76 | 7.941  | 3.987 | 4.861 | 1.00 | 0.00 |
| ATOM | 1172 | CB GLU  | 76 | 7.628  | 3.453 | 6.913 | 1.00 | 0.00 |
| ATOM | 1173 | HB2 GLU | 76 | 6.801  | 3.165 | 7.562 | 1.00 | 0.00 |
| ATOM | 1174 | HB3 GLU | 76 | 8.353  | 2.640 | 6.868 | 1.00 | 0.00 |
| ATOM | 1175 | CG GLU  | 76 | 8.302  | 4.707 | 7.472 | 1.00 | 0.00 |

|      |      |     |     |    |       |       |       |      |      |
|------|------|-----|-----|----|-------|-------|-------|------|------|
| ATOM | 1176 | HG2 | GLU | 76 | 9.054 | 5.059 | 6.766 | 1.00 | 0.00 |
| ATOM | 1177 | HG3 | GLU | 76 | 7.554 | 5.484 | 7.625 | 1.00 | 0.00 |
| ATOM | 1178 | CD  | GLU | 76 | 8.973 | 4.376 | 8.807 | 1.00 | 0.00 |
| ATOM | 1179 | OE1 | GLU | 76 | 8.966 | 3.213 | 9.179 | 1.00 | 0.00 |
| ATOM | 1180 | OE2 | GLU | 76 | 9.481 | 5.289 | 9.435 | 1.00 | 0.00 |
| ATOM | 1181 | C   | GLU | 76 | 6.377 | 2.507 | 4.966 | 1.00 | 0.00 |
| ATOM | 1182 | O   | GLU | 76 | 6.993 | 1.566 | 4.504 | 1.00 | 0.00 |
| ATOM | 1183 | N   | ALA | 77 | 5.072 | 2.508 | 5.011 | 1.00 | 0.00 |
| ATOM | 1184 | H   | ALA | 77 | 4.554 | 3.286 | 5.392 | 1.00 | 0.00 |
| ATOM | 1185 | CA  | ALA | 77 | 4.310 | 1.339 | 4.492 | 1.00 | 0.00 |
| ATOM | 1186 | HA  | ALA | 77 | 4.779 | 0.391 | 4.759 | 1.00 | 0.00 |
| ATOM | 1187 | CB  | ALA | 77 | 2.889 | 1.359 | 5.060 | 1.00 | 0.00 |
| ATOM | 1188 | HB1 | ALA | 77 | 2.404 | 2.297 | 4.793 | 1.00 | 0.00 |
| ATOM | 1189 | HB2 | ALA | 77 | 2.321 | 0.525 | 4.647 | 1.00 | 0.00 |
| ATOM | 1190 | HB3 | ALA | 77 | 2.930 | 1.267 | 6.145 | 1.00 | 0.00 |
| ATOM | 1191 | C   | ALA | 77 | 4.254 | 1.418 | 2.967 | 1.00 | 0.00 |
| ATOM | 1192 | O   | ALA | 77 | 4.712 | 0.531 | 2.273 | 1.00 | 0.00 |
| ATOM | 1193 | N   | LEU | 78 | 3.704 | 2.475 | 2.437 | 1.00 | 0.00 |
| ATOM | 1194 | H   | LEU | 78 | 3.322 | 3.218 | 3.004 | 1.00 | 0.00 |
| ATOM | 1195 | CA  | LEU | 78 | 3.632 | 2.609 | 0.956 | 1.00 | 0.00 |
| ATOM | 1196 | HA  | LEU | 78 | 2.986 | 1.836 | 0.539 | 1.00 | 0.00 |
| ATOM | 1197 | CB  | LEU | 78 | 3.056 | 3.978 | 0.590 | 1.00 | 0.00 |

|      |      |      |     |    |       |       |        |      |      |
|------|------|------|-----|----|-------|-------|--------|------|------|
| ATOM | 1198 | HB2  | LEU | 78 | 2.098 | 4.115 | 1.091  | 1.00 | 0.00 |
| ATOM | 1199 | HB3  | LEU | 78 | 3.746 | 4.760 | 0.907  | 1.00 | 0.00 |
| ATOM | 1200 | CG   | LEU | 78 | 2.856 | 4.058 | -0.923 | 1.00 | 0.00 |
| ATOM | 1201 | HG   | LEU | 78 | 3.766 | 3.733 | -1.428 | 1.00 | 0.00 |
| ATOM | 1202 | CD1  | LEU | 78 | 1.694 | 3.151 | -1.333 | 1.00 | 0.00 |
| ATOM | 1203 | HD11 | LEU | 78 | 0.784 | 3.475 | -0.829 | 1.00 | 0.00 |
| ATOM | 1204 | HD12 | LEU | 78 | 1.551 | 3.208 | -2.412 | 1.00 | 0.00 |
| ATOM | 1205 | HD13 | LEU | 78 | 1.918 | 2.122 | -1.050 | 1.00 | 0.00 |
| ATOM | 1206 | CD2  | LEU | 78 | 2.541 | 5.501 | -1.322 | 1.00 | 0.00 |
| ATOM | 1207 | HD21 | LEU | 78 | 3.369 | 6.147 | -1.031 | 1.00 | 0.00 |
| ATOM | 1208 | HD22 | LEU | 78 | 2.399 | 5.557 | -2.401 | 1.00 | 0.00 |
| ATOM | 1209 | HD23 | LEU | 78 | 1.631 | 5.827 | -0.818 | 1.00 | 0.00 |
| ATOM | 1210 | C    | LEU | 78 | 5.042 | 2.476 | 0.380  | 1.00 | 0.00 |
| ATOM | 1211 | O    | LEU | 78 | 5.265 | 1.776 | -0.587 | 1.00 | 0.00 |
| ATOM | 1212 | N    | GLN | 79 | 5.996 | 3.141 | 0.973  | 1.00 | 0.00 |
| ATOM | 1213 | H    | GLN | 79 | 5.816 | 3.724 | 1.778  | 1.00 | 0.00 |
| ATOM | 1214 | CA   | GLN | 79 | 7.392 | 3.050 | 0.466  | 1.00 | 0.00 |
| ATOM | 1215 | HA   | GLN | 79 | 7.463 | 3.496 | -0.526 | 1.00 | 0.00 |
| ATOM | 1216 | CB   | GLN | 79 | 8.332 | 3.805 | 1.410  | 1.00 | 0.00 |
| ATOM | 1217 | HB2  | GLN | 79 | 8.203 | 3.432 | 2.426  | 1.00 | 0.00 |
| ATOM | 1218 | HB3  | GLN | 79 | 9.364 | 3.651 | 1.095  | 1.00 | 0.00 |
| ATOM | 1219 | CG   | GLN | 79 | 8.004 | 5.299 | 1.369  | 1.00 | 0.00 |

|      |      |      |     |    |        |        |        |      |      |
|------|------|------|-----|----|--------|--------|--------|------|------|
| ATOM | 1220 | HG2  | GLN | 79 | 8.175  | 5.695  | 0.368  | 1.00 | 0.00 |
| ATOM | 1221 | HG3  | GLN | 79 | 6.966  | 5.467  | 1.653  | 1.00 | 0.00 |
| ATOM | 1222 | CD   | GLN | 79 | 8.908  | 6.046  | 2.352  | 1.00 | 0.00 |
| ATOM | 1223 | OE1  | GLN | 79 | 9.131  | 7.320  | 2.176  | 1.00 | 0.00 |
| ATOM | 1224 | NE2  | GLN | 79 | 9.418  | 5.464  | 3.289  | 1.00 | 0.00 |
| ATOM | 1225 | HE21 | GLN | 79 | 10.013 | 5.969  | 3.930  | 1.00 | 0.00 |
| ATOM | 1226 | HE22 | GLN | 79 | 9.245  | 4.477  | 3.422  | 1.00 | 0.00 |
| ATOM | 1227 | C    | GLN | 79 | 7.807  | 1.582  | 0.400  | 1.00 | 0.00 |
| ATOM | 1228 | O    | GLN | 79 | 8.371  | 1.128  | -0.575 | 1.00 | 0.00 |
| ATOM | 1229 | N    | GLN | 80 | 7.524  | 0.832  | 1.429  | 1.00 | 0.00 |
| ATOM | 1230 | H    | GLN | 80 | 7.052  | 1.199  | 2.242  | 1.00 | 0.00 |
| ATOM | 1231 | CA   | GLN | 80 | 7.897  | -0.610 | 1.421  | 1.00 | 0.00 |
| ATOM | 1232 | HA   | GLN | 80 | 8.982  | -0.719 | 1.402  | 1.00 | 0.00 |
| ATOM | 1233 | CB   | GLN | 80 | 7.360  | -1.286 | 2.684  | 1.00 | 0.00 |
| ATOM | 1234 | HB2  | GLN | 80 | 7.684  | -0.727 | 3.562  | 1.00 | 0.00 |
| ATOM | 1235 | HB3  | GLN | 80 | 6.271  | -1.309 | 2.650  | 1.00 | 0.00 |
| ATOM | 1236 | CG   | GLN | 80 | 7.897  | -2.716 | 2.764  | 1.00 | 0.00 |
| ATOM | 1237 | HG2  | GLN | 80 | 7.437  | -3.246 | 3.598  | 1.00 | 0.00 |
| ATOM | 1238 | HG3  | GLN | 80 | 7.692  | -3.251 | 1.837  | 1.00 | 0.00 |
| ATOM | 1239 | CD   | GLN | 80 | 9.411  | -2.681 | 2.983  | 1.00 | 0.00 |
| ATOM | 1240 | OE1  | GLN | 80 | 9.898  | -1.954 | 3.826  | 1.00 | 0.00 |
| ATOM | 1241 | NE2  | GLN | 80 | 10.181 | -3.441 | 2.253  | 1.00 | 0.00 |

|      |      |      |     |    |        |        |        |      |      |
|------|------|------|-----|----|--------|--------|--------|------|------|
| ATOM | 1242 | HE21 | GLN | 80 | 11.181 | -3.424 | 2.392  | 1.00 | 0.00 |
| ATOM | 1243 | HE22 | GLN | 80 | 9.773  | -4.044 | 1.552  | 1.00 | 0.00 |
| ATOM | 1244 | C    | GLN | 80 | 7.287  | -1.277 | 0.187  | 1.00 | 0.00 |
| ATOM | 1245 | O    | GLN | 80 | 7.952  | -1.996 | -0.533 | 1.00 | 0.00 |
| ATOM | 1246 | N    | ILE | 81 | 6.030  | -1.038 | -0.066 | 1.00 | 0.00 |
| ATOM | 1247 | H    | ILE | 81 | 5.472  | -0.440 | 0.526  | 1.00 | 0.00 |
| ATOM | 1248 | CA   | ILE | 81 | 5.383  | -1.653 | -1.258 | 1.00 | 0.00 |
| ATOM | 1249 | HA   | ILE | 81 | 5.252  | -2.722 | -1.090 | 1.00 | 0.00 |
| ATOM | 1250 | CB   | ILE | 81 | 4.018  | -1.002 | -1.488 | 1.00 | 0.00 |
| ATOM | 1251 | HB   | ILE | 81 | 4.142  | 0.076  | -1.584 | 1.00 | 0.00 |
| ATOM | 1252 | CG2  | ILE | 81 | 3.395  | -1.559 | -2.769 | 1.00 | 0.00 |
| ATOM | 1253 | HG21 | ILE | 81 | 3.271  | -2.638 | -2.674 | 1.00 | 0.00 |
| ATOM | 1254 | HG22 | ILE | 81 | 2.423  | -1.095 | -2.932 | 1.00 | 0.00 |
| ATOM | 1255 | HG23 | ILE | 81 | 4.047  | -1.343 | -3.615 | 1.00 | 0.00 |
| ATOM | 1256 | CG1  | ILE | 81 | 3.099  | -1.306 | -0.303 | 1.00 | 0.00 |
| ATOM | 1257 | HG12 | ILE | 81 | 3.057  | -2.384 | -0.144 | 1.00 | 0.00 |
| ATOM | 1258 | HG13 | ILE | 81 | 3.489  | -0.822 | 0.592  | 1.00 | 0.00 |
| ATOM | 1259 | CD1  | ILE | 81 | 1.693  | -0.778 | -0.597 | 1.00 | 0.00 |
| ATOM | 1260 | HD11 | ILE | 81 | 1.303  | -1.262 | -1.492 | 1.00 | 0.00 |
| ATOM | 1261 | HD12 | ILE | 81 | 1.039  | -0.995 | 0.247  | 1.00 | 0.00 |
| ATOM | 1262 | HD13 | ILE | 81 | 1.735  | 0.299  | -0.756 | 1.00 | 0.00 |
| ATOM | 1263 | C    | ILE | 81 | 6.273  | -1.426 | -2.480 | 1.00 | 0.00 |

|      |      |     |     |    |        |        |        |      |      |
|------|------|-----|-----|----|--------|--------|--------|------|------|
| ATOM | 1264 | O   | ILE | 81 | 6.765  | -2.359 | -3.085 | 1.00 | 0.00 |
| ATOM | 1265 | N   | MET | 82 | 6.490  | -0.192 | -2.845 | 1.00 | 0.00 |
| ATOM | 1266 | H   | MET | 82 | 6.086  | 0.587  | -2.346 | 1.00 | 0.00 |
| ATOM | 1267 | CA  | MET | 82 | 7.354  | 0.095  | -4.023 | 1.00 | 0.00 |
| ATOM | 1268 | HA  | MET | 82 | 6.824  | -0.135 | -4.947 | 1.00 | 0.00 |
| ATOM | 1269 | CB  | MET | 82 | 7.728  | 1.579  | -4.030 | 1.00 | 0.00 |
| ATOM | 1270 | HB2 | MET | 82 | 8.383  | 1.793  | -3.185 | 1.00 | 0.00 |
| ATOM | 1271 | HB3 | MET | 82 | 8.245  | 1.819  | -4.959 | 1.00 | 0.00 |
| ATOM | 1272 | CG  | MET | 82 | 6.459  | 2.426  | -3.919 | 1.00 | 0.00 |
| ATOM | 1273 | HG2 | MET | 82 | 6.016  | 2.300  | -2.931 | 1.00 | 0.00 |
| ATOM | 1274 | HG3 | MET | 82 | 6.702  | 3.476  | -4.077 | 1.00 | 0.00 |
| ATOM | 1275 | SD  | MET | 82 | 5.270  | 1.895  | -5.176 | 1.00 | 0.00 |
| ATOM | 1276 | CE  | MET | 82 | 6.255  | 2.351  | -6.625 | 1.00 | 0.00 |
| ATOM | 1277 | HE1 | MET | 82 | 7.196  | 1.800  | -6.614 | 1.00 | 0.00 |
| ATOM | 1278 | HE2 | MET | 82 | 5.703  | 2.106  | -7.532 | 1.00 | 0.00 |
| ATOM | 1279 | HE3 | MET | 82 | 6.461  | 3.421  | -6.603 | 1.00 | 0.00 |
| ATOM | 1280 | C   | MET | 82 | 8.624  | -0.750 | -3.937 | 1.00 | 0.00 |
| ATOM | 1281 | O   | MET | 82 | 8.985  | -1.445 | -4.864 | 1.00 | 0.00 |
| ATOM | 1282 | N   | GLU | 83 | 9.300  | -0.701 | -2.825 | 1.00 | 0.00 |
| ATOM | 1283 | H   | GLU | 83 | 9.004  | -0.129 | -2.048 | 1.00 | 0.00 |
| ATOM | 1284 | CA  | GLU | 83 | 10.545 | -1.504 | -2.676 | 1.00 | 0.00 |
| ATOM | 1285 | HA  | GLU | 83 | 11.224 | -1.308 | -3.506 | 1.00 | 0.00 |



|      |      |      |     |    |        |        |        |      |      |
|------|------|------|-----|----|--------|--------|--------|------|------|
| ATOM | 1286 | CB   | GLU | 83 | 11.246 | -1.121 | -1.370 | 1.00 | 0.00 |
| ATOM | 1287 | HB2  | GLU | 83 | 10.553 | -1.239 | -0.537 | 1.00 | 0.00 |
| ATOM | 1288 | HB3  | GLU | 83 | 12.110 | -1.768 | -1.217 | 1.00 | 0.00 |
| ATOM | 1289 | CG   | GLU | 83 | 11.707 | 0.336  | -1.448 | 1.00 | 0.00 |
| ATOM | 1290 | HG2  | GLU | 83 | 12.338 | 0.472  | -2.327 | 1.00 | 0.00 |
| ATOM | 1291 | HG3  | GLU | 83 | 10.837 | 0.988  | -1.521 | 1.00 | 0.00 |
| ATOM | 1292 | CD   | GLU | 83 | 12.503 | 0.687  | -0.190 | 1.00 | 0.00 |
| ATOM | 1293 | OE1  | GLU | 83 | 12.571 | -0.146 | 0.697  | 1.00 | 0.00 |
| ATOM | 1294 | OE2  | GLU | 83 | 13.033 | 1.785  | -0.136 | 1.00 | 0.00 |
| ATOM | 1295 | C    | GLU | 83 | 10.185 | -2.990 | -2.647 | 1.00 | 0.00 |
| ATOM | 1296 | O    | GLU | 83 | 11.033 | -3.848 | -2.789 | 1.00 | 0.00 |
| ATOM | 1297 | N    | ASN | 84 | 8.930  | -3.297 | -2.468 | 1.00 | 0.00 |
| ATOM | 1298 | H    | ASN | 84 | 8.222  | -2.588 | -2.349 | 1.00 | 0.00 |
| ATOM | 1299 | CA   | ASN | 84 | 8.511  | -4.725 | -2.434 | 1.00 | 0.00 |
| ATOM | 1300 | HA   | ASN | 84 | 9.249  | -5.323 | -1.898 | 1.00 | 0.00 |
| ATOM | 1301 | CB   | ASN | 84 | 7.166  | -4.847 | -1.714 | 1.00 | 0.00 |
| ATOM | 1302 | HB2  | ASN | 84 | 7.209  | -4.348 | -0.746 | 1.00 | 0.00 |
| ATOM | 1303 | HB3  | ASN | 84 | 6.373  | -4.404 | -2.316 | 1.00 | 0.00 |
| ATOM | 1304 | CG   | ASN | 84 | 6.841  | -6.324 | -1.488 | 1.00 | 0.00 |
| ATOM | 1305 | OD1  | ASN | 84 | 7.462  | -6.978 | -0.674 | 1.00 | 0.00 |
| ATOM | 1306 | ND2  | ASN | 84 | 5.886  | -6.883 | -2.180 | 1.00 | 0.00 |
| ATOM | 1307 | HD21 | ASN | 84 | 5.666  | -7.859 | -2.036 | 1.00 | 0.00 |

|      |      |      |     |    |       |        |        |      |      |
|------|------|------|-----|----|-------|--------|--------|------|------|
| ATOM | 1308 | HD22 | ASN | 84 | 5.371 | -6.338 | -2.857 | 1.00 | 0.00 |
| ATOM | 1309 | C    | ASN | 84 | 8.374 | -5.248 | -3.865 | 1.00 | 0.00 |
| ATOM | 1310 | O    | ASN | 84 | 8.423 | -6.438 | -4.107 | 1.00 | 0.00 |
| ATOM | 1311 | N    | GLN | 85 | 8.201 | -4.370 | -4.816 | 1.00 | 0.00 |
| ATOM | 1312 | H    | GLN | 85 | 8.156 | -3.379 | -4.626 | 1.00 | 0.00 |
| ATOM | 1313 | CA   | GLN | 85 | 8.063 | -4.826 | -6.228 | 1.00 | 0.00 |
| ATOM | 1314 | HA   | GLN | 85 | 8.869 | -5.514 | -6.485 | 1.00 | 0.00 |
| ATOM | 1315 | CB   | GLN | 85 | 6.727 | -5.553 | -6.400 | 1.00 | 0.00 |
| ATOM | 1316 | HB2  | GLN | 85 | 6.607 | -6.288 | -5.604 | 1.00 | 0.00 |
| ATOM | 1317 | HB3  | GLN | 85 | 5.911 | -4.832 | -6.354 | 1.00 | 0.00 |
| ATOM | 1318 | CG   | GLN | 85 | 6.704 | -6.262 | -7.756 | 1.00 | 0.00 |
| ATOM | 1319 | HG2  | GLN | 85 | 6.810 | -5.538 | -8.564 | 1.00 | 0.00 |
| ATOM | 1320 | HG3  | GLN | 85 | 7.512 | -6.992 | -7.816 | 1.00 | 0.00 |
| ATOM | 1321 | CD   | GLN | 85 | 5.371 | -6.993 | -7.926 | 1.00 | 0.00 |
| ATOM | 1322 | OE1  | GLN | 85 | 4.669 | -7.233 | -6.964 | 1.00 | 0.00 |
| ATOM | 1323 | NE2  | GLN | 85 | 4.990 | -7.360 | -9.119 | 1.00 | 0.00 |
| ATOM | 1324 | HE21 | GLN | 85 | 4.111 | -7.843 | -9.239 | 1.00 | 0.00 |
| ATOM | 1325 | HE22 | GLN | 85 | 5.576 | -7.160 | -9.917 | 1.00 | 0.00 |
| ATOM | 1326 | C    | GLN | 85 | 8.109 | -3.619 | -7.171 | 1.00 | 0.00 |
| ATOM | 1327 | O    | GLN | 85 | 7.291 | -3.484 | -8.058 | 1.00 | 0.00 |
| ATOM | 1328 | N    | CYX | 86 | 9.063 | -2.744 | -6.992 | 1.00 | 0.00 |
| ATOM | 1329 | H    | CYX | 86 | 9.750 | -2.846 | -6.258 | 1.00 | 0.00 |

|      |      |     |     |    |        |        |         |      |      |
|------|------|-----|-----|----|--------|--------|---------|------|------|
| ATOM | 1330 | CA  | CYX | 86 | 9.156  | -1.555 | -7.888  | 1.00 | 0.00 |
| ATOM | 1331 | HA  | CYX | 86 | 8.174  | -1.312 | -8.294  | 1.00 | 0.00 |
| ATOM | 1332 | CB  | CYX | 86 | 9.669  | -0.351 | -7.095  | 1.00 | 0.00 |
| ATOM | 1333 | HB2 | CYX | 86 | 9.873  | 0.474  | -7.778  | 1.00 | 0.00 |
| ATOM | 1334 | HB3 | CYX | 86 | 8.915  | -0.045 | -6.371  | 1.00 | 0.00 |
| ATOM | 1335 | SG  | CYX | 86 | 11.221 | -0.785 | -6.271  | 1.00 | 0.00 |
| ATOM | 1336 | C   | CYX | 86 | 10.122 | -1.857 | -9.034  | 1.00 | 0.00 |
| ATOM | 1337 | O   | CYX | 86 | 10.235 | -1.102 | -9.979  | 1.00 | 0.00 |
| ATOM | 1338 | N   | ASP | 87 | 10.824 | -2.956 | -8.957  | 1.00 | 0.00 |
| ATOM | 1339 | H   | ASP | 87 | 10.737 | -3.588 | -8.174  | 1.00 | 0.00 |
| ATOM | 1340 | CA  | ASP | 87 | 11.783 | -3.305 | -10.042 | 1.00 | 0.00 |
| ATOM | 1341 | HA  | ASP | 87 | 12.671 | -2.675 | -9.980  | 1.00 | 0.00 |
| ATOM | 1342 | CB  | ASP | 87 | 12.210 | -4.767 | -9.893  | 1.00 | 0.00 |
| ATOM | 1343 | HB2 | ASP | 87 | 11.339 | -5.379 | -9.657  | 1.00 | 0.00 |
| ATOM | 1344 | HB3 | ASP | 87 | 12.654 | -5.113 | -10.827 | 1.00 | 0.00 |
| ATOM | 1345 | CG  | ASP | 87 | 13.237 | -4.887 | -8.765  | 1.00 | 0.00 |
| ATOM | 1346 | OD1 | ASP | 87 | 13.670 | -3.858 | -8.272  | 1.00 | 0.00 |
| ATOM | 1347 | OD2 | ASP | 87 | 13.573 | -6.005 | -8.413  | 1.00 | 0.00 |
| ATOM | 1348 | C   | ASP | 87 | 11.111 | -3.107 | -11.402 | 1.00 | 0.00 |
| ATOM | 1349 | O   | ASP | 87 | 11.669 | -2.507 | -12.300 | 1.00 | 0.00 |
| ATOM | 1350 | N   | ARG | 88 | 9.917  | -3.609 | -11.563 | 1.00 | 0.00 |
| ATOM | 1351 | H   | ARG | 88 | 9.448  | -4.110 | -10.822 | 1.00 | 0.00 |

|      |      |      |     |    |       |         |         |      |      |
|------|------|------|-----|----|-------|---------|---------|------|------|
| ATOM | 1352 | CA   | ARG | 88 | 9.212 | -3.451  | -12.866 | 1.00 | 0.00 |
| ATOM | 1353 | HA   | ARG | 88 | 9.815 | -3.865  | -13.675 | 1.00 | 0.00 |
| ATOM | 1354 | CB   | ARG | 88 | 7.878 | -4.200  | -12.818 | 1.00 | 0.00 |
| ATOM | 1355 | HB2  | ARG | 88 | 7.293 | -3.847  | -11.969 | 1.00 | 0.00 |
| ATOM | 1356 | HB3  | ARG | 88 | 7.326 | -4.019  | -13.740 | 1.00 | 0.00 |
| ATOM | 1357 | CG   | ARG | 88 | 8.140 | -5.700  | -12.667 | 1.00 | 0.00 |
| ATOM | 1358 | HG2  | ARG | 88 | 8.730 | -6.053  | -13.513 | 1.00 | 0.00 |
| ATOM | 1359 | HG3  | ARG | 88 | 8.687 | -5.882  | -11.742 | 1.00 | 0.00 |
| ATOM | 1360 | CD   | ARG | 88 | 6.808 | -6.450  | -12.627 | 1.00 | 0.00 |
| ATOM | 1361 | HD2  | ARG | 88 | 6.147 | -6.005  | -11.884 | 1.00 | 0.00 |
| ATOM | 1362 | HD3  | ARG | 88 | 6.328 | -6.418  | -13.605 | 1.00 | 0.00 |
| ATOM | 1363 | NE   | ARG | 88 | 7.048 | -7.873  | -12.260 | 1.00 | 0.00 |
| ATOM | 1364 | HE   | ARG | 88 | 6.760 | -8.244  | -11.365 | 1.00 | 0.00 |
| ATOM | 1365 | CZ   | ARG | 88 | 7.642 | -8.674  | -13.104 | 1.00 | 0.00 |
| ATOM | 1366 | NH1  | ARG | 88 | 6.935 | -9.485  | -13.841 | 1.00 | 0.00 |
| ATOM | 1367 | HH11 | ARG | 88 | 5.929 | -9.492  | -13.757 | 1.00 | 0.00 |
| ATOM | 1368 | HH12 | ARG | 88 | 7.397 | -10.103 | -14.493 | 1.00 | 0.00 |
| ATOM | 1369 | NH2  | ARG | 88 | 8.943 | -8.661  | -13.210 | 1.00 | 0.00 |
| ATOM | 1370 | HH21 | ARG | 88 | 9.487 | -8.031  | -12.638 | 1.00 | 0.00 |
| ATOM | 1371 | HH22 | ARG | 88 | 9.400 | -9.282  | -13.863 | 1.00 | 0.00 |
| ATOM | 1372 | C    | ARG | 88 | 8.953 | -1.966  | -13.134 | 1.00 | 0.00 |
| ATOM | 1373 | O    | ARG | 88 | 8.597 | -1.577  | -14.228 | 1.00 | 0.00 |

|      |      |      |     |    |        |        |         |      |      |
|------|------|------|-----|----|--------|--------|---------|------|------|
| ATOM | 1374 | N    | LEU | 89 | 9.132  | -1.135 | -12.145 | 1.00 | 0.00 |
| ATOM | 1375 | H    | LEU | 89 | 9.428  | -1.451 | -11.232 | 1.00 | 0.00 |
| ATOM | 1376 | CA   | LEU | 89 | 8.897  | 0.323  | -12.347 | 1.00 | 0.00 |
| ATOM | 1377 | HA   | LEU | 89 | 7.870  | 0.499  | -12.665 | 1.00 | 0.00 |
| ATOM | 1378 | CB   | LEU | 89 | 9.137  | 1.068  | -11.032 | 1.00 | 0.00 |
| ATOM | 1379 | HB2  | LEU | 89 | 8.650  | 0.534  | -10.216 | 1.00 | 0.00 |
| ATOM | 1380 | HB3  | LEU | 89 | 10.208 | 1.127  | -10.839 | 1.00 | 0.00 |
| ATOM | 1381 | CG   | LEU | 89 | 8.559  | 2.480  | -11.134 | 1.00 | 0.00 |
| ATOM | 1382 | HG   | LEU | 89 | 8.973  | 2.980  | -12.010 | 1.00 | 0.00 |
| ATOM | 1383 | CD1  | LEU | 89 | 7.037  | 2.399  | -11.265 | 1.00 | 0.00 |
| ATOM | 1384 | HD11 | LEU | 89 | 6.623  | 1.899  | -10.390 | 1.00 | 0.00 |
| ATOM | 1385 | HD12 | LEU | 89 | 6.624  | 3.405  | -11.338 | 1.00 | 0.00 |
| ATOM | 1386 | HD13 | LEU | 89 | 6.779  | 1.835  | -12.161 | 1.00 | 0.00 |
| ATOM | 1387 | CD2  | LEU | 89 | 8.918  | 3.273  | -9.877  | 1.00 | 0.00 |
| ATOM | 1388 | HD21 | LEU | 89 | 10.002 | 3.331  | -9.781  | 1.00 | 0.00 |
| ATOM | 1389 | HD22 | LEU | 89 | 8.506  | 4.279  | -9.951  | 1.00 | 0.00 |
| ATOM | 1390 | HD23 | LEU | 89 | 8.503  | 2.774  | -9.001  | 1.00 | 0.00 |
| ATOM | 1391 | C    | LEU | 89 | 9.857  | 0.852  | -13.415 | 1.00 | 0.00 |
| ATOM | 1392 | O    | LEU | 89 | 9.674  | 1.927  | -13.950 | 1.00 | 0.00 |
| ATOM | 1393 | N    | GLN | 90 | 10.880 | 0.104  | -13.728 | 1.00 | 0.00 |
| ATOM | 1394 | H    | GLN | 90 | 11.039 | -0.792 | -13.288 | 1.00 | 0.00 |
| ATOM | 1395 | CA   | GLN | 90 | 11.850 | 0.565  | -14.761 | 1.00 | 0.00 |

|      |      |      |     |    |        |        |         |      |      |
|------|------|------|-----|----|--------|--------|---------|------|------|
| ATOM | 1396 | HA   | GLN | 90 | 12.493 | 1.346  | -14.355 | 1.00 | 0.00 |
| ATOM | 1397 | CB   | GLN | 90 | 12.726 | -0.611 | -15.198 | 1.00 | 0.00 |
| ATOM | 1398 | HB2  | GLN | 90 | 12.098 | -1.480 | -15.395 | 1.00 | 0.00 |
| ATOM | 1399 | HB3  | GLN | 90 | 13.269 | -0.344 | -16.105 | 1.00 | 0.00 |
| ATOM | 1400 | CG   | GLN | 90 | 13.724 | -0.945 | -14.086 | 1.00 | 0.00 |
| ATOM | 1401 | HG2  | GLN | 90 | 14.296 | -0.058 | -13.813 | 1.00 | 0.00 |
| ATOM | 1402 | HG3  | GLN | 90 | 13.202 | -1.325 | -13.208 | 1.00 | 0.00 |
| ATOM | 1403 | CD   | GLN | 90 | 14.695 | -2.019 | -14.580 | 1.00 | 0.00 |
| ATOM | 1404 | OE1  | GLN | 90 | 14.470 | -2.633 | -15.604 | 1.00 | 0.00 |
| ATOM | 1405 | NE2  | GLN | 90 | 15.772 | -2.275 | -13.889 | 1.00 | 0.00 |
| ATOM | 1406 | HE21 | GLN | 90 | 16.418 | -2.983 | -14.209 | 1.00 | 0.00 |
| ATOM | 1407 | HE22 | GLN | 90 | 15.955 | -1.765 | -13.037 | 1.00 | 0.00 |
| ATOM | 1408 | C    | GLN | 90 | 11.088 | 1.108  | -15.970 | 1.00 | 0.00 |
| ATOM | 1409 | O    | GLN | 90 | 11.586 | 1.929  | -16.714 | 1.00 | 0.00 |
| ATOM | 1410 | N    | ASP | 91 | 9.880  | 0.656  | -16.174 | 1.00 | 0.00 |
| ATOM | 1411 | H    | ASP | 91 | 9.459  | -0.026 | -15.559 | 1.00 | 0.00 |
| ATOM | 1412 | CA   | ASP | 91 | 9.086  | 1.145  | -17.335 | 1.00 | 0.00 |
| ATOM | 1413 | HA   | ASP | 91 | 9.645  | 1.007  | -18.261 | 1.00 | 0.00 |
| ATOM | 1414 | CB   | ASP | 91 | 7.781  | 0.354  | -17.430 | 1.00 | 0.00 |
| ATOM | 1415 | HB2  | ASP | 91 | 7.248  | 0.417  | -16.481 | 1.00 | 0.00 |
| ATOM | 1416 | HB3  | ASP | 91 | 7.160  | 0.770  | -18.223 | 1.00 | 0.00 |
| ATOM | 1417 | CG   | ASP | 91 | 8.093  | -1.110 | -17.742 | 1.00 | 0.00 |

|      |      |      |     |    |        |        |         |      |      |
|------|------|------|-----|----|--------|--------|---------|------|------|
| ATOM | 1418 | OD1  | ASP | 91 | 9.223  | -1.389 | -18.109 | 1.00 | 0.00 |
| ATOM | 1419 | OD2  | ASP | 91 | 7.198  | -1.929 | -17.610 | 1.00 | 0.00 |
| ATOM | 1420 | C    | ASP | 91 | 8.769  | 2.630  | -17.146 | 1.00 | 0.00 |
| ATOM | 1421 | O    | ASP | 91 | 8.499  | 3.084  | -16.051 | 1.00 | 0.00 |
| ATOM | 1422 | N    | ARG | 92 | 8.802  | 3.393  | -18.205 | 1.00 | 0.00 |
| ATOM | 1423 | H    | ARG | 92 | 9.028  | 3.024  | -19.118 | 1.00 | 0.00 |
| ATOM | 1424 | CA   | ARG | 92 | 8.503  | 4.848  | -18.085 | 1.00 | 0.00 |
| ATOM | 1425 | HA   | ARG | 92 | 9.079  | 5.285  | -17.269 | 1.00 | 0.00 |
| ATOM | 1426 | CB   | ARG | 92 | 8.882  | 5.557  | -19.386 | 1.00 | 0.00 |
| ATOM | 1427 | HB2  | ARG | 92 | 9.958  | 5.478  | -19.542 | 1.00 | 0.00 |
| ATOM | 1428 | HB3  | ARG | 92 | 8.360  | 5.088  | -20.220 | 1.00 | 0.00 |
| ATOM | 1429 | CG   | ARG | 92 | 8.486  | 7.031  | -19.300 | 1.00 | 0.00 |
| ATOM | 1430 | HG2  | ARG | 92 | 7.443  | 7.109  | -18.994 | 1.00 | 0.00 |
| ATOM | 1431 | HG3  | ARG | 92 | 9.118  | 7.535  | -18.569 | 1.00 | 0.00 |
| ATOM | 1432 | CD   | ARG | 92 | 8.666  | 7.689  | -20.669 | 1.00 | 0.00 |
| ATOM | 1433 | HD2  | ARG | 92 | 7.954  | 7.275  | -21.383 | 1.00 | 0.00 |
| ATOM | 1434 | HD3  | ARG | 92 | 8.518  | 8.766  | -20.592 | 1.00 | 0.00 |
| ATOM | 1435 | NE   | ARG | 92 | 10.046 | 7.431  | -21.167 | 1.00 | 0.00 |
| ATOM | 1436 | HE   | ARG | 92 | 10.644 | 6.742  | -20.732 | 1.00 | 0.00 |
| ATOM | 1437 | CZ   | ARG | 92 | 10.507 | 8.099  | -22.188 | 1.00 | 0.00 |
| ATOM | 1438 | NH1  | ARG | 92 | 10.242 | 9.371  | -22.308 | 1.00 | 0.00 |
| ATOM | 1439 | HH11 | ARG | 92 | 9.680  | 9.834  | -21.609 | 1.00 | 0.00 |

|      |      |      |     |    |        |       |         |      |      |
|------|------|------|-----|----|--------|-------|---------|------|------|
| ATOM | 1440 | HH12 | ARG | 92 | 10.601 | 9.885 | -23.100 | 1.00 | 0.00 |
| ATOM | 1441 | NH2  | ARG | 92 | 11.235 | 7.496 | -23.088 | 1.00 | 0.00 |
| ATOM | 1442 | HH21 | ARG | 92 | 11.440 | 6.511 | -22.991 | 1.00 | 0.00 |
| ATOM | 1443 | HH22 | ARG | 92 | 11.591 | 8.016 | -23.877 | 1.00 | 0.00 |
| ATOM | 1444 | C    | ARG | 92 | 7.009  | 5.041 | -17.816 | 1.00 | 0.00 |
| ATOM | 1445 | O    | ARG | 92 | 6.576  | 6.091 | -17.383 | 1.00 | 0.00 |
| ATOM | 1446 | N    | GLN | 93 | 6.216  | 4.037 | -18.070 | 1.00 | 0.00 |
| ATOM | 1447 | H    | GLN | 93 | 6.568  | 3.161 | -18.431 | 1.00 | 0.00 |
| ATOM | 1448 | CA   | GLN | 93 | 4.752  | 4.164 | -17.830 | 1.00 | 0.00 |
| ATOM | 1449 | HA   | GLN | 93 | 4.395  | 5.135 | -18.170 | 1.00 | 0.00 |
| ATOM | 1450 | CB   | GLN | 93 | 4.013  | 3.071 | -18.608 | 1.00 | 0.00 |
| ATOM | 1451 | HB2  | GLN | 93 | 4.373  | 3.050 | -19.637 | 1.00 | 0.00 |
| ATOM | 1452 | HB3  | GLN | 93 | 4.197  | 2.103 | -18.140 | 1.00 | 0.00 |
| ATOM | 1453 | CG   | GLN | 93 | 2.511  | 3.365 | -18.599 | 1.00 | 0.00 |
| ATOM | 1454 | HG2  | GLN | 93 | 2.113  | 3.275 | -17.588 | 1.00 | 0.00 |
| ATOM | 1455 | HG3  | GLN | 93 | 2.321  | 4.369 | -18.976 | 1.00 | 0.00 |
| ATOM | 1456 | CD   | GLN | 93 | 1.790  | 2.360 | -19.500 | 1.00 | 0.00 |
| ATOM | 1457 | OE1  | GLN | 93 | 2.419  | 1.622 | -20.232 | 1.00 | 0.00 |
| ATOM | 1458 | NE2  | GLN | 93 | 0.487  | 2.299 | -19.476 | 1.00 | 0.00 |
| ATOM | 1459 | HE21 | GLN | 93 | 0.005  | 1.638 | -20.068 | 1.00 | 0.00 |
| ATOM | 1460 | HE22 | GLN | 93 | -0.033 | 2.913 | -18.866 | 1.00 | 0.00 |
| ATOM | 1461 | C    | GLN | 93 | 4.461  | 4.012 | -16.335 | 1.00 | 0.00 |



|      |      |     |     |    |       |        |         |      |      |
|------|------|-----|-----|----|-------|--------|---------|------|------|
| ATOM | 1462 | O   | GLN | 93 | 3.785 | 4.828  | -15.740 | 1.00 | 0.00 |
| ATOM | 1463 | N   | MET | 94 | 4.965 | 2.975  | -15.724 | 1.00 | 0.00 |
| ATOM | 1464 | H   | MET | 94 | 5.530 | 2.294  | -16.212 | 1.00 | 0.00 |
| ATOM | 1465 | CA  | MET | 94 | 4.715 | 2.772  | -14.269 | 1.00 | 0.00 |
| ATOM | 1466 | HA  | MET | 94 | 3.650 | 2.628  | -14.085 | 1.00 | 0.00 |
| ATOM | 1467 | CB  | MET | 94 | 5.465 | 1.529  | -13.789 | 1.00 | 0.00 |
| ATOM | 1468 | HB2 | MET | 94 | 6.494 | 1.564  | -14.149 | 1.00 | 0.00 |
| ATOM | 1469 | HB3 | MET | 94 | 5.463 | 1.502  | -12.699 | 1.00 | 0.00 |
| ATOM | 1470 | CG  | MET | 94 | 4.779 | 0.274  | -14.331 | 1.00 | 0.00 |
| ATOM | 1471 | HG2 | MET | 94 | 4.459 | 0.444  | -15.359 | 1.00 | 0.00 |
| ATOM | 1472 | HG3 | MET | 94 | 5.473 | -0.567 | -14.302 | 1.00 | 0.00 |
| ATOM | 1473 | SD  | MET | 94 | 3.333 | -0.112 | -13.313 | 1.00 | 0.00 |
| ATOM | 1474 | CE  | MET | 94 | 4.182 | -0.171 | -11.715 | 1.00 | 0.00 |
| ATOM | 1475 | HE1 | MET | 94 | 4.646 | 0.794  | -11.513 | 1.00 | 0.00 |
| ATOM | 1476 | HE2 | MET | 94 | 3.463 | -0.400 | -10.929 | 1.00 | 0.00 |
| ATOM | 1477 | HE3 | MET | 94 | 4.950 | -0.944 | -11.739 | 1.00 | 0.00 |
| ATOM | 1478 | C   | MET | 94 | 5.208 | 3.993  | -13.488 | 1.00 | 0.00 |
| ATOM | 1479 | O   | MET | 94 | 4.578 | 4.437  | -12.550 | 1.00 | 0.00 |
| ATOM | 1480 | N   | VAL | 95 | 6.336 | 4.533  | -13.864 | 1.00 | 0.00 |
| ATOM | 1481 | H   | VAL | 95 | 6.867 | 4.164  | -14.640 | 1.00 | 0.00 |
| ATOM | 1482 | CA  | VAL | 95 | 6.875 | 5.721  | -13.140 | 1.00 | 0.00 |
| ATOM | 1483 | HA  | VAL | 95 | 7.372 | 5.409  | -12.221 | 1.00 | 0.00 |

|      |      |      |     |    |       |        |         |      |      |
|------|------|------|-----|----|-------|--------|---------|------|------|
| ATOM | 1484 | CB   | VAL | 95 | 7.893 | 6.440  | -14.027 | 1.00 | 0.00 |
| ATOM | 1485 | HB   | VAL | 95 | 7.438 | 6.671  | -14.990 | 1.00 | 0.00 |
| ATOM | 1486 | CG1  | VAL | 95 | 8.335 | 7.737  | -13.348 | 1.00 | 0.00 |
| ATOM | 1487 | HG11 | VAL | 95 | 8.791 | 7.506  | -12.385 | 1.00 | 0.00 |
| ATOM | 1488 | HG12 | VAL | 95 | 9.061 | 8.249  | -13.980 | 1.00 | 0.00 |
| ATOM | 1489 | HG13 | VAL | 95 | 7.469 | 8.380  | -13.194 | 1.00 | 0.00 |
| ATOM | 1490 | CG2  | VAL | 95 | 9.110 | 5.537  | -14.241 | 1.00 | 0.00 |
| ATOM | 1491 | HG21 | VAL | 95 | 8.796 | 4.611  | -14.725 | 1.00 | 0.00 |
| ATOM | 1492 | HG22 | VAL | 95 | 9.836 | 6.048  | -14.873 | 1.00 | 0.00 |
| ATOM | 1493 | HG23 | VAL | 95 | 9.566 | 5.306  | -13.278 | 1.00 | 0.00 |
| ATOM | 1494 | C    | VAL | 95 | 5.733 | 6.680  | -12.793 | 1.00 | 0.00 |
| ATOM | 1495 | O    | VAL | 95 | 5.106 | 6.563  | -11.759 | 1.00 | 0.00 |
| ATOM | 1496 | N    | GLN | 96 | 5.461 | 7.628  | -13.646 | 1.00 | 0.00 |
| ATOM | 1497 | H    | GLN | 96 | 5.980 | 7.734  | -14.506 | 1.00 | 0.00 |
| ATOM | 1498 | CA   | GLN | 96 | 4.362 | 8.593  | -13.360 | 1.00 | 0.00 |
| ATOM | 1499 | HA   | GLN | 96 | 4.601 | 9.187  | -12.478 | 1.00 | 0.00 |
| ATOM | 1500 | CB   | GLN | 96 | 4.187 | 9.536  | -14.553 | 1.00 | 0.00 |
| ATOM | 1501 | HB2  | GLN | 96 | 3.903 | 8.959  | -15.433 | 1.00 | 0.00 |
| ATOM | 1502 | HB3  | GLN | 96 | 3.408 | 10.264 | -14.329 | 1.00 | 0.00 |
| ATOM | 1503 | CG   | GLN | 96 | 5.504 | 10.265 | -14.825 | 1.00 | 0.00 |
| ATOM | 1504 | HG2  | GLN | 96 | 5.841 | 10.789 | -13.930 | 1.00 | 0.00 |
| ATOM | 1505 | HG3  | GLN | 96 | 6.270 | 9.555  | -15.139 | 1.00 | 0.00 |

|      |      |      |     |    |        |        |         |      |      |
|------|------|------|-----|----|--------|--------|---------|------|------|
| ATOM | 1506 | CD   | GLN | 96 | 5.298  | 11.289 | -15.943 | 1.00 | 0.00 |
| ATOM | 1507 | OE1  | GLN | 96 | 4.578  | 12.254 | -15.775 | 1.00 | 0.00 |
| ATOM | 1508 | NE2  | GLN | 96 | 5.906  | 11.121 | -17.086 | 1.00 | 0.00 |
| ATOM | 1509 | HE21 | GLN | 96 | 5.775  | 11.793 | -17.828 | 1.00 | 0.00 |
| ATOM | 1510 | HE22 | GLN | 96 | 6.505  | 10.319 | -17.223 | 1.00 | 0.00 |
| ATOM | 1511 | C    | GLN | 96 | 3.061  | 7.831  | -13.116 | 1.00 | 0.00 |
| ATOM | 1512 | O    | GLN | 96 | 2.421  | 7.982  | -12.094 | 1.00 | 0.00 |
| ATOM | 1513 | N    | GLN | 97 | 2.665  | 7.014  | -14.048 | 1.00 | 0.00 |
| ATOM | 1514 | H    | GLN | 97 | 3.192  | 6.889  | -14.900 | 1.00 | 0.00 |
| ATOM | 1515 | CA   | GLN | 97 | 1.405  | 6.238  | -13.877 | 1.00 | 0.00 |
| ATOM | 1516 | HA   | GLN | 97 | 0.540  | 6.883  | -14.027 | 1.00 | 0.00 |
| ATOM | 1517 | CB   | GLN | 97 | 1.359  | 5.110  | -14.910 | 1.00 | 0.00 |
| ATOM | 1518 | HB2  | GLN | 97 | 1.685  | 5.489  | -15.879 | 1.00 | 0.00 |
| ATOM | 1519 | HB3  | GLN | 97 | 2.020  | 4.301  | -14.597 | 1.00 | 0.00 |
| ATOM | 1520 | CG   | GLN | 97 | -0.073 | 4.583  | -15.024 | 1.00 | 0.00 |
| ATOM | 1521 | HG2  | GLN | 97 | -0.109 | 3.724  | -15.695 | 1.00 | 0.00 |
| ATOM | 1522 | HG3  | GLN | 97 | -0.447 | 4.292  | -14.042 | 1.00 | 0.00 |
| ATOM | 1523 | CD   | GLN | 97 | -0.977 | 5.681  | -15.586 | 1.00 | 0.00 |
| ATOM | 1524 | OE1  | GLN | 97 | -0.855 | 6.057  | -16.735 | 1.00 | 0.00 |
| ATOM | 1525 | NE2  | GLN | 97 | -1.888 | 6.214  | -14.818 | 1.00 | 0.00 |
| ATOM | 1526 | HE21 | GLN | 97 | -2.489 | 6.939  | -15.182 | 1.00 | 0.00 |
| ATOM | 1527 | HE22 | GLN | 97 | -1.987 | 5.898  | -13.864 | 1.00 | 0.00 |

|      |      |     |     |    |       |       |         |      |      |
|------|------|-----|-----|----|-------|-------|---------|------|------|
| ATOM | 1528 | C   | GLN | 97 | 1.354 | 5.646 | -12.467 | 1.00 | 0.00 |
| ATOM | 1529 | O   | GLN | 97 | 0.556 | 6.048 | -11.643 | 1.00 | 0.00 |
| ATOM | 1530 | N   | PHE | 98 | 2.201 | 4.695 | -12.181 | 1.00 | 0.00 |
| ATOM | 1531 | H   | PHE | 98 | 2.868 | 4.349 | -12.856 | 1.00 | 0.00 |
| ATOM | 1532 | CA  | PHE | 98 | 2.193 | 4.086 | -10.820 | 1.00 | 0.00 |
| ATOM | 1533 | HA  | PHE | 98 | 1.271 | 3.525 | -10.668 | 1.00 | 0.00 |
| ATOM | 1534 | CB  | PHE | 98 | 3.379 | 3.129 | -10.664 | 1.00 | 0.00 |
| ATOM | 1535 | HB2 | PHE | 98 | 3.426 | 2.399 | -11.473 | 1.00 | 0.00 |
| ATOM | 1536 | HB3 | PHE | 98 | 4.330 | 3.658 | -10.598 | 1.00 | 0.00 |
| ATOM | 1537 | CG  | PHE | 98 | 3.231 | 2.342 | -9.379  | 1.00 | 0.00 |
| ATOM | 1538 | CD1 | PHE | 98 | 2.031 | 2.390 | -8.654  | 1.00 | 0.00 |
| ATOM | 1539 | HD1 | PHE | 98 | 1.201 | 2.995 | -9.017  | 1.00 | 0.00 |
| ATOM | 1540 | CE1 | PHE | 98 | 1.900 | 1.662 | -7.467  | 1.00 | 0.00 |
| ATOM | 1541 | HE1 | PHE | 98 | 0.966 | 1.700 | -6.906  | 1.00 | 0.00 |
| ATOM | 1542 | CZ  | PHE | 98 | 2.965 | 0.885 | -6.999  | 1.00 | 0.00 |
| ATOM | 1543 | HZ  | PHE | 98 | 2.862 | 0.318 | -6.073  | 1.00 | 0.00 |
| ATOM | 1544 | CE2 | PHE | 98 | 4.164 | 0.835 | -7.720  | 1.00 | 0.00 |
| ATOM | 1545 | HE2 | PHE | 98 | 4.994 | 0.229 | -7.356  | 1.00 | 0.00 |
| ATOM | 1546 | CD2 | PHE | 98 | 4.297 | 1.563 | -8.909  | 1.00 | 0.00 |
| ATOM | 1547 | HD2 | PHE | 98 | 5.231 | 1.524 | -9.470  | 1.00 | 0.00 |
| ATOM | 1548 | C   | PHE | 98 | 2.292 | 5.195 | -9.774  | 1.00 | 0.00 |
| ATOM | 1549 | O   | PHE | 98 | 1.662 | 5.143 | -8.737  | 1.00 | 0.00 |

|      |      |     |     |    |       |        |         |      |      |
|------|------|-----|-----|----|-------|--------|---------|------|------|
| ATOM | 1550 | N   | LYS | 99 | 3.077 | 6.201  | -10.042 | 1.00 | 0.00 |
| ATOM | 1551 | H   | LYS | 99 | 3.603 | 6.249  | -10.903 | 1.00 | 0.00 |
| ATOM | 1552 | CA  | LYS | 99 | 3.214 | 7.318  | -9.067  | 1.00 | 0.00 |
| ATOM | 1553 | HA  | LYS | 99 | 3.508 | 6.932  | -8.091  | 1.00 | 0.00 |
| ATOM | 1554 | CB  | LYS | 99 | 4.289 | 8.292  | -9.551  | 1.00 | 0.00 |
| ATOM | 1555 | HB2 | LYS | 99 | 5.202 | 7.742  | -9.779  | 1.00 | 0.00 |
| ATOM | 1556 | HB3 | LYS | 99 | 3.940 | 8.802  | -10.449 | 1.00 | 0.00 |
| ATOM | 1557 | CG  | LYS | 99 | 4.574 | 9.323  | -8.456  | 1.00 | 0.00 |
| ATOM | 1558 | HG2 | LYS | 99 | 3.647 | 9.824  | -8.177  | 1.00 | 0.00 |
| ATOM | 1559 | HG3 | LYS | 99 | 4.993 | 8.821  | -7.583  | 1.00 | 0.00 |
| ATOM | 1560 | CD  | LYS | 99 | 5.574 | 10.356 | -8.979  | 1.00 | 0.00 |
| ATOM | 1561 | HD2 | LYS | 99 | 6.521 | 9.865  | -9.203  | 1.00 | 0.00 |
| ATOM | 1562 | HD3 | LYS | 99 | 5.181 | 10.816 | -9.885  | 1.00 | 0.00 |
| ATOM | 1563 | CE  | LYS | 99 | 5.797 | 11.433 | -7.915  | 1.00 | 0.00 |
| ATOM | 1564 | HE2 | LYS | 99 | 5.617 | 12.416 | -8.349  | 1.00 | 0.00 |
| ATOM | 1565 | HE3 | LYS | 99 | 5.110 | 11.271 | -7.084  | 1.00 | 0.00 |
| ATOM | 1566 | NZ  | LYS | 99 | 7.200 | 11.359 | -7.420  | 1.00 | 0.00 |
| ATOM | 1567 | HZ1 | LYS | 99 | 7.837 | 11.509 | -8.190  | 1.00 | 0.00 |
| ATOM | 1568 | HZ2 | LYS | 99 | 7.347 | 12.069 | -6.718  | 1.00 | 0.00 |
| ATOM | 1569 | HZ3 | LYS | 99 | 7.368 | 10.448 | -7.017  | 1.00 | 0.00 |
| ATOM | 1570 | C   | LYS | 99 | 1.876 | 8.050  | -8.952  | 1.00 | 0.00 |
| ATOM | 1571 | O   | LYS | 99 | 1.512 | 8.540  | -7.902  | 1.00 | 0.00 |

|      |      |      |     |     |        |        |         |      |      |
|------|------|------|-----|-----|--------|--------|---------|------|------|
| ATOM | 1572 | N    | ARG | 100 | 1.139  | 8.121  | -10.025 | 1.00 | 0.00 |
| ATOM | 1573 | H    | ARG | 100 | 1.437  | 7.715  | -10.901 | 1.00 | 0.00 |
| ATOM | 1574 | CA   | ARG | 100 | -0.179 | 8.813  | -9.979  | 1.00 | 0.00 |
| ATOM | 1575 | HA   | ARG | 100 | -0.067 | 9.809  | -9.551  | 1.00 | 0.00 |
| ATOM | 1576 | CB   | ARG | 100 | -0.737 | 8.950  | -11.397 | 1.00 | 0.00 |
| ATOM | 1577 | HB2  | ARG | 100 | -0.555 | 8.029  | -11.951 | 1.00 | 0.00 |
| ATOM | 1578 | HB3  | ARG | 100 | -1.809 | 9.139  | -11.350 | 1.00 | 0.00 |
| ATOM | 1579 | CG   | ARG | 100 | -0.044 | 10.116 | -12.105 | 1.00 | 0.00 |
| ATOM | 1580 | HG2  | ARG | 100 | -0.191 | 11.029 | -11.529 | 1.00 | 0.00 |
| ATOM | 1581 | HG3  | ARG | 100 | 1.023  | 9.907  | -12.189 | 1.00 | 0.00 |
| ATOM | 1582 | CD   | ARG | 100 | -0.641 | 10.293 | -13.503 | 1.00 | 0.00 |
| ATOM | 1583 | HD2  | ARG | 100 | -0.734 | 9.326  | -13.999 | 1.00 | 0.00 |
| ATOM | 1584 | HD3  | ARG | 100 | -1.622 | 10.763 | -13.438 | 1.00 | 0.00 |
| ATOM | 1585 | NE   | ARG | 100 | 0.253  | 11.164 | -14.318 | 1.00 | 0.00 |
| ATOM | 1586 | HE   | ARG | 100 | 1.159  | 10.845 | -14.631 | 1.00 | 0.00 |
| ATOM | 1587 | CZ   | ARG | 100 | -0.129 | 12.368 | -14.643 | 1.00 | 0.00 |
| ATOM | 1588 | NH1  | ARG | 100 | 0.497  | 13.405 | -14.157 | 1.00 | 0.00 |
| ATOM | 1589 | HH11 | ARG | 100 | 1.277  | 13.271 | -13.529 | 1.00 | 0.00 |
| ATOM | 1590 | HH12 | ARG | 100 | 0.199  | 14.335 | -14.411 | 1.00 | 0.00 |
| ATOM | 1591 | NH2  | ARG | 100 | -1.137 | 12.536 | -15.454 | 1.00 | 0.00 |
| ATOM | 1592 | HH21 | ARG | 100 | -1.619 | 11.731 | -15.829 | 1.00 | 0.00 |
| ATOM | 1593 | HH22 | ARG | 100 | -1.430 | 13.469 | -15.704 | 1.00 | 0.00 |

|      |      |     |     |     |        |       |         |      |      |
|------|------|-----|-----|-----|--------|-------|---------|------|------|
| ATOM | 1594 | C   | ARG | 100 | -1.143 | 7.991 | -9.125  | 1.00 | 0.00 |
| ATOM | 1595 | O   | ARG | 100 | -1.744 | 8.490 | -8.194  | 1.00 | 0.00 |
| ATOM | 1596 | N   | GLU | 101 | -1.287 | 6.728 | -9.424  | 1.00 | 0.00 |
| ATOM | 1597 | H   | GLU | 101 | -0.788 | 6.302 | -10.192 | 1.00 | 0.00 |
| ATOM | 1598 | CA  | GLU | 101 | -2.202 | 5.874 | -8.618  | 1.00 | 0.00 |
| ATOM | 1599 | HA  | GLU | 101 | -3.216 | 6.270 | -8.653  | 1.00 | 0.00 |
| ATOM | 1600 | CB  | GLU | 101 | -2.212 | 4.454 | -9.187  | 1.00 | 0.00 |
| ATOM | 1601 | HB2 | GLU | 101 | -1.191 | 4.074 | -9.234  | 1.00 | 0.00 |
| ATOM | 1602 | HB3 | GLU | 101 | -2.809 | 3.809 | -8.543  | 1.00 | 0.00 |
| ATOM | 1603 | CG  | GLU | 101 | -2.815 | 4.469 | -10.593 | 1.00 | 0.00 |
| ATOM | 1604 | HG2 | GLU | 101 | -2.144 | 4.997 | -11.270 | 1.00 | 0.00 |
| ATOM | 1605 | HG3 | GLU | 101 | -2.951 | 3.445 | -10.943 | 1.00 | 0.00 |
| ATOM | 1606 | CD  | GLU | 101 | -4.169 | 5.181 | -10.559 | 1.00 | 0.00 |
| ATOM | 1607 | OE1 | GLU | 101 | -4.879 | 5.017 | -9.581  | 1.00 | 0.00 |
| ATOM | 1608 | OE2 | GLU | 101 | -4.474 | 5.878 | -11.514 | 1.00 | 0.00 |
| ATOM | 1609 | C   | GLU | 101 | -1.700 | 5.843 | -7.176  | 1.00 | 0.00 |
| ATOM | 1610 | O   | GLU | 101 | -2.469 | 5.859 | -6.235  | 1.00 | 0.00 |
| ATOM | 1611 | N   | LEU | 102 | -0.407 | 5.800 | -6.997  | 1.00 | 0.00 |
| ATOM | 1612 | H   | LEU | 102 | 0.235  | 5.784 | -7.777  | 1.00 | 0.00 |
| ATOM | 1613 | CA  | LEU | 102 | 0.156  | 5.771 | -5.620  | 1.00 | 0.00 |
| ATOM | 1614 | HA  | LEU | 102 | -0.147 | 4.859 | -5.106  | 1.00 | 0.00 |
| ATOM | 1615 | CB  | LEU | 102 | 1.684  | 5.805 | -5.695  | 1.00 | 0.00 |

|      |      |      |     |     |        |        |        |      |      |
|------|------|------|-----|-----|--------|--------|--------|------|------|
| ATOM | 1616 | HB2  | LEU | 102 | 1.997  | 5.747  | -6.738 | 1.00 | 0.00 |
| ATOM | 1617 | HB3  | LEU | 102 | 2.047  | 6.735  | -5.259 | 1.00 | 0.00 |
| ATOM | 1618 | CG   | LEU | 102 | 2.266  | 4.618  | -4.921 | 1.00 | 0.00 |
| ATOM | 1619 | HG   | LEU | 102 | 2.183  | 4.807  | -3.851 | 1.00 | 0.00 |
| ATOM | 1620 | CD1  | LEU | 102 | 1.495  | 3.344  | -5.275 | 1.00 | 0.00 |
| ATOM | 1621 | HD11 | LEU | 102 | 1.579  | 3.153  | -6.345 | 1.00 | 0.00 |
| ATOM | 1622 | HD12 | LEU | 102 | 1.912  | 2.501  | -4.723 | 1.00 | 0.00 |
| ATOM | 1623 | HD13 | LEU | 102 | 0.445  | 3.468  | -5.010 | 1.00 | 0.00 |
| ATOM | 1624 | CD2  | LEU | 102 | 3.739  | 4.441  | -5.295 | 1.00 | 0.00 |
| ATOM | 1625 | HD21 | LEU | 102 | 4.290  | 5.346  | -5.041 | 1.00 | 0.00 |
| ATOM | 1626 | HD22 | LEU | 102 | 4.155  | 3.596  | -4.745 | 1.00 | 0.00 |
| ATOM | 1627 | HD23 | LEU | 102 | 3.823  | 4.253  | -6.366 | 1.00 | 0.00 |
| ATOM | 1628 | C    | LEU | 102 | -0.345 | 6.986  | -4.838 | 1.00 | 0.00 |
| ATOM | 1629 | O    | LEU | 102 | -0.634 | 6.902  | -3.663 | 1.00 | 0.00 |
| ATOM | 1630 | N    | MET | 103 | -0.457 | 8.116  | -5.483 | 1.00 | 0.00 |
| ATOM | 1631 | H    | MET | 103 | -0.223 | 8.197  | -6.462 | 1.00 | 0.00 |
| ATOM | 1632 | CA   | MET | 103 | -0.946 | 9.329  | -4.770 | 1.00 | 0.00 |
| ATOM | 1633 | HA   | MET | 103 | -0.313 | 9.541  | -3.908 | 1.00 | 0.00 |
| ATOM | 1634 | CB   | MET | 103 | -0.904 | 10.531 | -5.715 | 1.00 | 0.00 |
| ATOM | 1635 | HB2  | MET | 103 | -1.356 | 10.260 | -6.669 | 1.00 | 0.00 |
| ATOM | 1636 | HB3  | MET | 103 | -1.456 | 11.360 | -5.274 | 1.00 | 0.00 |
| ATOM | 1637 | CG   | MET | 103 | 0.551  | 10.950 | -5.941 | 1.00 | 0.00 |



|      |      |     |     |     |        |        |        |      |      |
|------|------|-----|-----|-----|--------|--------|--------|------|------|
| ATOM | 1638 | HG2 | MET | 103 | 1.030  | 11.151 | -4.983 | 1.00 | 0.00 |
| ATOM | 1639 | HG3 | MET | 103 | 1.089  | 10.153 | -6.455 | 1.00 | 0.00 |
| ATOM | 1640 | SD  | MET | 103 | 0.596  | 12.449 | -6.955 | 1.00 | 0.00 |
| ATOM | 1641 | CE  | MET | 103 | 0.337  | 13.637 | -5.616 | 1.00 | 0.00 |
| ATOM | 1642 | HE1 | MET | 103 | 1.143  | 13.545 | -4.887 | 1.00 | 0.00 |
| ATOM | 1643 | HE2 | MET | 103 | 0.330  | 14.648 | -6.023 | 1.00 | 0.00 |
| ATOM | 1644 | HE3 | MET | 103 | -0.617 | 13.434 | -5.129 | 1.00 | 0.00 |
| ATOM | 1645 | C   | MET | 103 | -2.385 | 9.091  | -4.310 | 1.00 | 0.00 |
| ATOM | 1646 | O   | MET | 103 | -2.814 | 9.594  | -3.291 | 1.00 | 0.00 |
| ATOM | 1647 | N   | SER | 104 | -3.132 | 8.321  | -5.054 | 1.00 | 0.00 |
| ATOM | 1648 | H   | SER | 104 | -2.779 | 7.899  | -5.901 | 1.00 | 0.00 |
| ATOM | 1649 | CA  | SER | 104 | -4.541 | 8.044  | -4.662 | 1.00 | 0.00 |
| ATOM | 1650 | HA  | SER | 104 | -5.005 | 8.943  | -4.259 | 1.00 | 0.00 |
| ATOM | 1651 | CB  | SER | 104 | -5.333 | 7.594  | -5.891 | 1.00 | 0.00 |
| ATOM | 1652 | HB2 | SER | 104 | -6.374 | 7.431  | -5.614 | 1.00 | 0.00 |
| ATOM | 1653 | HB3 | SER | 104 | -5.278 | 8.363  | -6.661 | 1.00 | 0.00 |
| ATOM | 1654 | OG  | SER | 104 | -4.782 | 6.384  | -6.391 | 1.00 | 0.00 |
| ATOM | 1655 | HG  | SER | 104 | -5.278 | 6.101  | -7.162 | 1.00 | 0.00 |
| ATOM | 1656 | C   | SER | 104 | -4.565 | 6.937  | -3.606 | 1.00 | 0.00 |
| ATOM | 1657 | O   | SER | 104 | -5.423 | 6.903  | -2.747 | 1.00 | 0.00 |
| ATOM | 1658 | N   | LEU | 105 | -3.631 | 6.027  | -3.667 | 1.00 | 0.00 |
| ATOM | 1659 | H   | LEU | 105 | -2.920 | 6.047  | -4.384 | 1.00 | 0.00 |

|      |      |      |     |     |        |       |        |      |      |
|------|------|------|-----|-----|--------|-------|--------|------|------|
| ATOM | 1660 | CA   | LEU | 105 | -3.599 | 4.919 | -2.672 | 1.00 | 0.00 |
| ATOM | 1661 | HA   | LEU | 105 | -4.347 | 4.166 | -2.921 | 1.00 | 0.00 |
| ATOM | 1662 | CB   | LEU | 105 | -2.218 | 4.258 | -2.684 | 1.00 | 0.00 |
| ATOM | 1663 | HB2  | LEU | 105 | -1.556 | 4.822 | -3.341 | 1.00 | 0.00 |
| ATOM | 1664 | HB3  | LEU | 105 | -1.808 | 4.252 | -1.674 | 1.00 | 0.00 |
| ATOM | 1665 | CG   | LEU | 105 | -2.338 | 2.819 | -3.194 | 1.00 | 0.00 |
| ATOM | 1666 | HG   | LEU | 105 | -1.400 | 2.292 | -3.017 | 1.00 | 0.00 |
| ATOM | 1667 | CD1  | LEU | 105 | -3.472 | 2.103 | -2.456 | 1.00 | 0.00 |
| ATOM | 1668 | HD11 | LEU | 105 | -4.410 | 2.628 | -2.634 | 1.00 | 0.00 |
| ATOM | 1669 | HD12 | LEU | 105 | -3.554 | 1.079 | -2.821 | 1.00 | 0.00 |
| ATOM | 1670 | HD13 | LEU | 105 | -3.259 | 2.090 | -1.387 | 1.00 | 0.00 |
| ATOM | 1671 | CD2  | LEU | 105 | -2.634 | 2.833 | -4.694 | 1.00 | 0.00 |
| ATOM | 1672 | HD21 | LEU | 105 | -1.824 | 3.338 | -5.220 | 1.00 | 0.00 |
| ATOM | 1673 | HD22 | LEU | 105 | -2.719 | 1.809 | -5.058 | 1.00 | 0.00 |
| ATOM | 1674 | HD23 | LEU | 105 | -3.570 | 3.361 | -4.875 | 1.00 | 0.00 |
| ATOM | 1675 | C    | LEU | 105 | -3.891 | 5.464 | -1.272 | 1.00 | 0.00 |
| ATOM | 1676 | O    | LEU | 105 | -4.734 | 4.949 | -0.565 | 1.00 | 0.00 |
| ATOM | 1677 | N    | PRO | 106 | -3.183 | 6.530 | -0.861 | 1.00 | 0.00 |
| ATOM | 1678 | CD   | PRO | 106 | -2.147 | 7.228 | -1.643 | 1.00 | 0.00 |
| ATOM | 1679 | HD2  | PRO | 106 | -2.497 | 7.381 | -2.664 | 1.00 | 0.00 |
| ATOM | 1680 | HD3  | PRO | 106 | -1.234 | 6.632 | -1.659 | 1.00 | 0.00 |
| ATOM | 1681 | CG   | PRO | 106 | -1.976 | 8.518 | -0.891 | 1.00 | 0.00 |

|      |      |         |     |        |        |        |      |      |
|------|------|---------|-----|--------|--------|--------|------|------|
| ATOM | 1682 | HG2 PRO | 106 | -2.663 | 9.266  | -1.287 | 1.00 | 0.00 |
| ATOM | 1683 | HG3 PRO | 106 | -0.951 | 8.872  | -1.001 | 1.00 | 0.00 |
| ATOM | 1684 | CB PRO  | 106 | -2.279 | 8.200  | 0.532  | 1.00 | 0.00 |
| ATOM | 1685 | HB2 PRO | 106 | -2.665 | 9.102  | 1.006  | 1.00 | 0.00 |
| ATOM | 1686 | HB3 PRO | 106 | -1.434 | 7.820  | 1.108  | 1.00 | 0.00 |
| ATOM | 1687 | CA PRO  | 106 | -3.378 | 7.140  | 0.458  | 1.00 | 0.00 |
| ATOM | 1688 | HA PRO  | 106 | -3.280 | 6.365  | 1.218  | 1.00 | 0.00 |
| ATOM | 1689 | C PRO   | 106 | -4.757 | 7.789  | 0.568  | 1.00 | 0.00 |
| ATOM | 1690 | O PRO   | 106 | -5.162 | 8.248  | 1.618  | 1.00 | 0.00 |
| ATOM | 1691 | N GLN   | 107 | -5.486 | 7.819  | -0.513 | 1.00 | 0.00 |
| ATOM | 1692 | H GLN   | 107 | -5.149 | 7.437  | -1.386 | 1.00 | 0.00 |
| ATOM | 1693 | CA GLN  | 107 | -6.844 | 8.423  | -0.485 | 1.00 | 0.00 |
| ATOM | 1694 | HA GLN  | 107 | -6.944 | 9.085  | 0.375  | 1.00 | 0.00 |
| ATOM | 1695 | CB GLN  | 107 | -7.070 | 9.239  | -1.759 | 1.00 | 0.00 |
| ATOM | 1696 | HB2 GLN | 107 | -6.287 | 9.991  | -1.853 | 1.00 | 0.00 |
| ATOM | 1697 | HB3 GLN | 107 | -7.042 | 8.577  | -2.625 | 1.00 | 0.00 |
| ATOM | 1698 | CG GLN  | 107 | -8.434 | 9.929  | -1.688 | 1.00 | 0.00 |
| ATOM | 1699 | HG2 GLN | 107 | -9.226 | 9.188  | -1.578 | 1.00 | 0.00 |
| ATOM | 1700 | HG3 GLN | 107 | -8.465 | 10.620 | -0.846 | 1.00 | 0.00 |
| ATOM | 1701 | CD GLN  | 107 | -8.676 | 10.716 | -2.977 | 1.00 | 0.00 |
| ATOM | 1702 | OE1 GLN | 107 | -7.789 | 10.848 | -3.798 | 1.00 | 0.00 |
| ATOM | 1703 | NE2 GLN | 107 | -9.847 | 11.250 | -3.192 | 1.00 | 0.00 |

|      |      |      |     |     |         |        |        |      |      |
|------|------|------|-----|-----|---------|--------|--------|------|------|
| ATOM | 1704 | HE21 | GLN | 107 | -10.013 | 11.770 | -4.041 | 1.00 | 0.00 |
| ATOM | 1705 | HE22 | GLN | 107 | -10.582 | 11.140 | -2.508 | 1.00 | 0.00 |
| ATOM | 1706 | C    | GLN | 107 | -7.884  | 7.308  | -0.399 | 1.00 | 0.00 |
| ATOM | 1707 | O    | GLN | 107 | -8.787  | 7.347  | 0.412  | 1.00 | 0.00 |
| ATOM | 1708 | N    | GLN | 108 | -7.766  | 6.313  | -1.235 | 1.00 | 0.00 |
| ATOM | 1709 | H    | GLN | 108 | -7.019  | 6.276  | -1.914 | 1.00 | 0.00 |
| ATOM | 1710 | CA   | GLN | 108 | -8.748  | 5.193  | -1.204 | 1.00 | 0.00 |
| ATOM | 1711 | HA   | GLN | 108 | -9.713  | 5.524  | -1.587 | 1.00 | 0.00 |
| ATOM | 1712 | CB   | GLN | 108 | -8.241  | 4.047  | -2.082 | 1.00 | 0.00 |
| ATOM | 1713 | HB2  | GLN | 108 | -8.041  | 4.419  | -3.087 | 1.00 | 0.00 |
| ATOM | 1714 | HB3  | GLN | 108 | -7.323  | 3.641  | -1.656 | 1.00 | 0.00 |
| ATOM | 1715 | CG   | GLN | 108 | -9.302  | 2.947  | -2.148 | 1.00 | 0.00 |
| ATOM | 1716 | HG2  | GLN | 108 | -9.582  | 2.628  | -1.144 | 1.00 | 0.00 |
| ATOM | 1717 | HG3  | GLN | 108 | -10.186 | 3.306  | -2.675 | 1.00 | 0.00 |
| ATOM | 1718 | CD   | GLN | 108 | -8.738  | 1.742  | -2.904 | 1.00 | 0.00 |
| ATOM | 1719 | OE1  | GLN | 108 | -7.829  | 1.087  | -2.436 | 1.00 | 0.00 |
| ATOM | 1720 | NE2  | GLN | 108 | -9.245  | 1.419  | -4.063 | 1.00 | 0.00 |
| ATOM | 1721 | HE21 | GLN | 108 | -8.878  | 0.624  | -4.568 | 1.00 | 0.00 |
| ATOM | 1722 | HE22 | GLN | 108 | -10.002 | 1.964  | -4.449 | 1.00 | 0.00 |
| ATOM | 1723 | C    | GLN | 108 | -8.915  | 4.699  | 0.233  | 1.00 | 0.00 |
| ATOM | 1724 | O    | GLN | 108 | -9.959  | 4.208  | 0.615  | 1.00 | 0.00 |
| ATOM | 1725 | N    | CYX | 109 | -7.894  | 4.825  | 1.035  | 1.00 | 0.00 |

|      |      |      |     |     |         |       |       |      |      |
|------|------|------|-----|-----|---------|-------|-------|------|------|
| ATOM | 1726 | H    | CYX | 109 | -7.022  | 5.230 | 0.725 | 1.00 | 0.00 |
| ATOM | 1727 | CA   | CYX | 109 | -7.994  | 4.362 | 2.448 | 1.00 | 0.00 |
| ATOM | 1728 | HA   | CYX | 109 | -9.037  | 4.198 | 2.718 | 1.00 | 0.00 |
| ATOM | 1729 | CB   | CYX | 109 | -7.233  | 3.042 | 2.614 | 1.00 | 0.00 |
| ATOM | 1730 | HB2  | CYX | 109 | -6.785  | 3.002 | 3.607 | 1.00 | 0.00 |
| ATOM | 1731 | HB3  | CYX | 109 | -7.922  | 2.206 | 2.493 | 1.00 | 0.00 |
| ATOM | 1732 | SG   | CYX | 109 | -5.891  | 2.949 | 1.400 | 1.00 | 0.00 |
| ATOM | 1733 | C    | CYX | 109 | -7.389  | 5.421 | 3.374 | 1.00 | 0.00 |
| ATOM | 1734 | O    | CYX | 109 | -6.919  | 5.118 | 4.453 | 1.00 | 0.00 |
| ATOM | 1735 | N    | ASN | 110 | -7.401  | 6.658 | 2.961 | 1.00 | 0.00 |
| ATOM | 1736 | H    | ASN | 110 | -7.791  | 6.913 | 2.065 | 1.00 | 0.00 |
| ATOM | 1737 | CA   | ASN | 110 | -6.830  | 7.737 | 3.816 | 1.00 | 0.00 |
| ATOM | 1738 | HA   | ASN | 110 | -6.642  | 8.631 | 3.221 | 1.00 | 0.00 |
| ATOM | 1739 | CB   | ASN | 110 | -7.823  | 8.088 | 4.926 | 1.00 | 0.00 |
| ATOM | 1740 | HB2  | ASN | 110 | -7.919  | 7.255 | 5.623 | 1.00 | 0.00 |
| ATOM | 1741 | HB3  | ASN | 110 | -7.490  | 8.975 | 5.464 | 1.00 | 0.00 |
| ATOM | 1742 | CG   | ASN | 110 | -9.195  | 8.374 | 4.313 | 1.00 | 0.00 |
| ATOM | 1743 | OD1  | ASN | 110 | -9.301  | 9.099 | 3.344 | 1.00 | 0.00 |
| ATOM | 1744 | ND2  | ASN | 110 | -10.258 | 7.831 | 4.841 | 1.00 | 0.00 |
| ATOM | 1745 | HD21 | ASN | 110 | -11.167 | 8.015 | 4.441 | 1.00 | 0.00 |
| ATOM | 1746 | HD22 | ASN | 110 | -10.166 | 7.228 | 5.647 | 1.00 | 0.00 |
| ATOM | 1747 | C    | ASN | 110 | -5.519  | 7.257 | 4.440 | 1.00 | 0.00 |

|      |      |     |     |     |        |       |       |      |      |
|------|------|-----|-----|-----|--------|-------|-------|------|------|
| ATOM | 1748 | O   | ASN | 110 | -5.279 | 7.435 | 5.618 | 1.00 | 0.00 |
| ATOM | 1749 | N   | PHE | 111 | -4.666 | 6.648 | 3.660 | 1.00 | 0.00 |
| ATOM | 1750 | H   | PHE | 111 | -4.856 | 6.491 | 2.680 | 1.00 | 0.00 |
| ATOM | 1751 | CA  | PHE | 111 | -3.372 | 6.161 | 4.214 | 1.00 | 0.00 |
| ATOM | 1752 | HA  | PHE | 111 | -3.542 | 5.594 | 5.129 | 1.00 | 0.00 |
| ATOM | 1753 | CB  | PHE | 111 | -2.691 | 5.248 | 3.193 | 1.00 | 0.00 |
| ATOM | 1754 | HB2 | PHE | 111 | -3.402 | 4.811 | 2.492 | 1.00 | 0.00 |
| ATOM | 1755 | HB3 | PHE | 111 | -1.906 | 5.763 | 2.640 | 1.00 | 0.00 |
| ATOM | 1756 | CG  | PHE | 111 | -2.029 | 4.096 | 3.911 | 1.00 | 0.00 |
| ATOM | 1757 | CD1 | PHE | 111 | -2.784 | 2.976 | 4.281 | 1.00 | 0.00 |
| ATOM | 1758 | HD1 | PHE | 111 | -3.848 | 2.934 | 4.050 | 1.00 | 0.00 |
| ATOM | 1759 | CE1 | PHE | 111 | -2.170 | 1.909 | 4.948 | 1.00 | 0.00 |
| ATOM | 1760 | HE1 | PHE | 111 | -2.758 | 1.038 | 5.238 | 1.00 | 0.00 |
| ATOM | 1761 | CZ  | PHE | 111 | -0.802 | 1.960 | 5.243 | 1.00 | 0.00 |
| ATOM | 1762 | HZ  | PHE | 111 | -0.324 | 1.128 | 5.761 | 1.00 | 0.00 |
| ATOM | 1763 | CE2 | PHE | 111 | -0.048 | 3.080 | 4.872 | 1.00 | 0.00 |
| ATOM | 1764 | HE2 | PHE | 111 | 1.017  | 3.121 | 5.102 | 1.00 | 0.00 |
| ATOM | 1765 | CD2 | PHE | 111 | -0.662 | 4.147 | 4.206 | 1.00 | 0.00 |
| ATOM | 1766 | HD2 | PHE | 111 | -0.075 | 5.018 | 3.917 | 1.00 | 0.00 |
| ATOM | 1767 | C   | PHE | 111 | -2.465 | 7.354 | 4.518 | 1.00 | 0.00 |
| ATOM | 1768 | O   | PHE | 111 | -1.379 | 7.203 | 5.040 | 1.00 | 0.00 |
| ATOM | 1769 | N   | ARG | 112 | -2.902 | 8.542 | 4.197 | 1.00 | 0.00 |

|      |      |      |     |     |        |        |       |      |      |
|------|------|------|-----|-----|--------|--------|-------|------|------|
| ATOM | 1770 | H    | ARG | 112 | -3.804 | 8.677  | 3.764 | 1.00 | 0.00 |
| ATOM | 1771 | CA   | ARG | 112 | -2.062 | 9.742  | 4.471 | 1.00 | 0.00 |
| ATOM | 1772 | HA   | ARG | 112 | -1.211 | 9.771  | 3.790 | 1.00 | 0.00 |
| ATOM | 1773 | CB   | ARG | 112 | -2.897 | 11.008 | 4.265 | 1.00 | 0.00 |
| ATOM | 1774 | HB2  | ARG | 112 | -3.782 | 10.967 | 4.900 | 1.00 | 0.00 |
| ATOM | 1775 | HB3  | ARG | 112 | -2.302 | 11.882 | 4.528 | 1.00 | 0.00 |
| ATOM | 1776 | CG   | ARG | 112 | -3.325 | 11.104 | 2.798 | 1.00 | 0.00 |
| ATOM | 1777 | HG2  | ARG | 112 | -2.443 | 11.071 | 2.158 | 1.00 | 0.00 |
| ATOM | 1778 | HG3  | ARG | 112 | -3.981 | 10.268 | 2.554 | 1.00 | 0.00 |
| ATOM | 1779 | CD   | ARG | 112 | -4.071 | 12.420 | 2.571 | 1.00 | 0.00 |
| ATOM | 1780 | HD2  | ARG | 112 | -3.422 | 13.265 | 2.800 | 1.00 | 0.00 |
| ATOM | 1781 | HD3  | ARG | 112 | -4.406 | 12.490 | 1.536 | 1.00 | 0.00 |
| ATOM | 1782 | NE   | ARG | 112 | -5.262 | 12.476 | 3.464 | 1.00 | 0.00 |
| ATOM | 1783 | HE   | ARG | 112 | -5.960 | 11.745 | 3.459 | 1.00 | 0.00 |
| ATOM | 1784 | CZ   | ARG | 112 | -5.422 | 13.485 | 4.277 | 1.00 | 0.00 |
| ATOM | 1785 | NH1  | ARG | 112 | -4.973 | 13.413 | 5.500 | 1.00 | 0.00 |
| ATOM | 1786 | HH11 | ARG | 112 | -4.502 | 12.576 | 5.814 | 1.00 | 0.00 |
| ATOM | 1787 | HH12 | ARG | 112 | -5.098 | 14.194 | 6.127 | 1.00 | 0.00 |
| ATOM | 1788 | NH2  | ARG | 112 | -6.030 | 14.563 | 3.867 | 1.00 | 0.00 |
| ATOM | 1789 | HH21 | ARG | 112 | -6.376 | 14.614 | 2.920 | 1.00 | 0.00 |
| ATOM | 1790 | HH22 | ARG | 112 | -6.152 | 15.341 | 4.499 | 1.00 | 0.00 |
| ATOM | 1791 | C    | ARG | 112 | -1.563 | 9.691  | 5.916 | 1.00 | 0.00 |

|      |      |     |     |     |        |        |        |      |      |
|------|------|-----|-----|-----|--------|--------|--------|------|------|
| ATOM | 1792 | O   | ARG | 112 | -2.176 | 9.088  | 6.774  | 1.00 | 0.00 |
| ATOM | 1793 | N   | ALA | 113 | -0.453 | 10.321 | 6.194  | 1.00 | 0.00 |
| ATOM | 1794 | H   | ALA | 113 | 0.064  | 10.825 | 5.488  | 1.00 | 0.00 |
| ATOM | 1795 | CA  | ALA | 113 | 0.082  | 10.306 | 7.584  | 1.00 | 0.00 |
| ATOM | 1796 | HA  | ALA | 113 | -0.685 | 10.038 | 8.311  | 1.00 | 0.00 |
| ATOM | 1797 | CB  | ALA | 113 | 1.222  | 9.291  | 7.681  | 1.00 | 0.00 |
| ATOM | 1798 | HB1 | ALA | 113 | 2.002  | 9.550  | 6.965  | 1.00 | 0.00 |
| ATOM | 1799 | HB2 | ALA | 113 | 1.636  | 9.303  | 8.689  | 1.00 | 0.00 |
| ATOM | 1800 | HB3 | ALA | 113 | 0.842  | 8.294  | 7.457  | 1.00 | 0.00 |
| ATOM | 1801 | C   | ALA | 113 | 0.606  | 11.697 | 7.945  | 1.00 | 0.00 |
| ATOM | 1802 | O   | ALA | 113 | 0.826  | 12.529 | 7.087  | 1.00 | 0.00 |
| ATOM | 1803 | N   | PRO | 114 | 0.809  | 11.948 | 9.247  | 1.00 | 0.00 |
| ATOM | 1804 | CD  | PRO | 114 | 0.566  | 10.994 | 10.342 | 1.00 | 0.00 |
| ATOM | 1805 | HD2 | PRO | 114 | 1.030  | 10.037 | 10.100 | 1.00 | 0.00 |
| ATOM | 1806 | HD3 | PRO | 114 | -0.507 | 10.854 | 10.470 | 1.00 | 0.00 |
| ATOM | 1807 | CG  | PRO | 114 | 1.203  | 11.660 | 11.528 | 1.00 | 0.00 |
| ATOM | 1808 | HG2 | PRO | 114 | 2.227  | 11.302 | 11.637 | 1.00 | 0.00 |
| ATOM | 1809 | HG3 | PRO | 114 | 0.636  | 11.417 | 12.427 | 1.00 | 0.00 |
| ATOM | 1810 | CB  | PRO | 114 | 1.165  | 13.126 | 11.253 | 1.00 | 0.00 |
| ATOM | 1811 | HB2 | PRO | 114 | 2.023  | 13.587 | 11.742 | 1.00 | 0.00 |
| ATOM | 1812 | HB3 | PRO | 114 | 0.252  | 13.624 | 11.577 | 1.00 | 0.00 |
| ATOM | 1813 | CA  | PRO | 114 | 1.310  | 13.238 | 9.736  | 1.00 | 0.00 |



|      |      |      |     |     |       |        |        |      |      |
|------|------|------|-----|-----|-------|--------|--------|------|------|
| ATOM | 1814 | HA   | PRO | 114 | 0.706 | 14.030 | 9.295  | 1.00 | 0.00 |
| ATOM | 1815 | C    | PRO | 114 | 2.780 | 13.452 | 9.366  | 1.00 | 0.00 |
| ATOM | 1816 | O    | PRO | 114 | 3.310 | 14.538 | 9.489  | 1.00 | 0.00 |
| ATOM | 1817 | N    | GLN | 115 | 3.442 | 12.423 | 8.911  | 1.00 | 0.00 |
| ATOM | 1818 | H    | GLN | 115 | 3.007 | 11.517 | 8.806  | 1.00 | 0.00 |
| ATOM | 1819 | CA   | GLN | 115 | 4.875 | 12.566 | 8.531  | 1.00 | 0.00 |
| ATOM | 1820 | HA   | GLN | 115 | 5.290 | 13.480 | 8.955  | 1.00 | 0.00 |
| ATOM | 1821 | CB   | GLN | 115 | 5.667 | 11.373 | 9.071  | 1.00 | 0.00 |
| ATOM | 1822 | HB2  | GLN | 115 | 5.305 | 10.455 | 8.607  | 1.00 | 0.00 |
| ATOM | 1823 | HB3  | GLN | 115 | 6.724 | 11.503 | 8.839  | 1.00 | 0.00 |
| ATOM | 1824 | CG   | GLN | 115 | 5.485 | 11.283 | 10.588 | 1.00 | 0.00 |
| ATOM | 1825 | HG2  | GLN | 115 | 4.437 | 11.111 | 10.833 | 1.00 | 0.00 |
| ATOM | 1826 | HG3  | GLN | 115 | 6.090 | 10.473 | 10.996 | 1.00 | 0.00 |
| ATOM | 1827 | CD   | GLN | 115 | 5.929 | 12.597 | 11.233 | 1.00 | 0.00 |
| ATOM | 1828 | OE1  | GLN | 115 | 7.024 | 13.066 | 10.990 | 1.00 | 0.00 |
| ATOM | 1829 | NE2  | GLN | 115 | 5.122 | 13.214 | 12.051 | 1.00 | 0.00 |
| ATOM | 1830 | HE21 | GLN | 115 | 5.410 | 14.082 | 12.480 | 1.00 | 0.00 |
| ATOM | 1831 | HE22 | GLN | 115 | 4.214 | 12.820 | 12.251 | 1.00 | 0.00 |
| ATOM | 1832 | C    | GLN | 115 | 4.996 | 12.611 | 7.007  | 1.00 | 0.00 |
| ATOM | 1833 | O    | GLN | 115 | 4.184 | 12.054 | 6.293  | 1.00 | 0.00 |
| ATOM | 1834 | N    | ARG | 116 | 6.002 | 13.268 | 6.501  | 1.00 | 0.00 |
| ATOM | 1835 | H    | ARG | 116 | 6.680 | 13.733 | 7.087  | 1.00 | 0.00 |

|      |      |      |     |     |       |        |       |      |      |
|------|------|------|-----|-----|-------|--------|-------|------|------|
| ATOM | 1836 | CA   | ARG | 116 | 6.173 | 13.347 | 5.023 | 1.00 | 0.00 |
| ATOM | 1837 | HA   | ARG | 116 | 5.347 | 12.844 | 4.519 | 1.00 | 0.00 |
| ATOM | 1838 | CB   | ARG | 116 | 6.191 | 14.814 | 4.589 | 1.00 | 0.00 |
| ATOM | 1839 | HB2  | ARG | 116 | 6.999 | 15.335 | 5.102 | 1.00 | 0.00 |
| ATOM | 1840 | HB3  | ARG | 116 | 6.348 | 14.873 | 3.512 | 1.00 | 0.00 |
| ATOM | 1841 | CG   | ARG | 116 | 4.854 | 15.467 | 4.946 | 1.00 | 0.00 |
| ATOM | 1842 | HG2  | ARG | 116 | 4.043 | 14.922 | 4.463 | 1.00 | 0.00 |
| ATOM | 1843 | HG3  | ARG | 116 | 4.715 | 15.442 | 6.027 | 1.00 | 0.00 |
| ATOM | 1844 | CD   | ARG | 116 | 4.851 | 16.919 | 4.464 | 1.00 | 0.00 |
| ATOM | 1845 | HD2  | ARG | 116 | 5.765 | 17.423 | 4.778 | 1.00 | 0.00 |
| ATOM | 1846 | HD3  | ARG | 116 | 4.772 | 16.956 | 3.377 | 1.00 | 0.00 |
| ATOM | 1847 | NE   | ARG | 116 | 3.684 | 17.635 | 5.053 | 1.00 | 0.00 |
| ATOM | 1848 | HE   | ARG | 116 | 3.778 | 18.205 | 5.881 | 1.00 | 0.00 |
| ATOM | 1849 | CZ   | ARG | 116 | 2.509 | 17.535 | 4.496 | 1.00 | 0.00 |
| ATOM | 1850 | NH1  | ARG | 116 | 2.292 | 16.623 | 3.588 | 1.00 | 0.00 |
| ATOM | 1851 | HH11 | ARG | 116 | 3.037 | 15.995 | 3.319 | 1.00 | 0.00 |
| ATOM | 1852 | HH12 | ARG | 116 | 1.381 | 16.548 | 3.159 | 1.00 | 0.00 |
| ATOM | 1853 | NH2  | ARG | 116 | 1.548 | 18.345 | 4.849 | 1.00 | 0.00 |
| ATOM | 1854 | HH21 | ARG | 116 | 1.718 | 19.048 | 5.554 | 1.00 | 0.00 |
| ATOM | 1855 | HH22 | ARG | 116 | 0.640 | 18.264 | 4.416 | 1.00 | 0.00 |
| ATOM | 1856 | C    | ARG | 116 | 7.491 | 12.681 | 4.624 | 1.00 | 0.00 |
| ATOM | 1857 | O    | ARG | 116 | 8.436 | 12.649 | 5.386 | 1.00 | 0.00 |

|      |      |     |     |     |        |        |        |      |      |
|------|------|-----|-----|-----|--------|--------|--------|------|------|
| ATOM | 1858 | N   | CYX | 117 | 7.561  | 12.146 | 3.436  | 1.00 | 0.00 |
| ATOM | 1859 | H   | CYX | 117 | 6.779  | 12.168 | 2.797  | 1.00 | 0.00 |
| ATOM | 1860 | CA  | CYX | 117 | 8.817  | 11.482 | 2.991  | 1.00 | 0.00 |
| ATOM | 1861 | HA  | CYX | 117 | 9.548  | 11.474 | 3.800  | 1.00 | 0.00 |
| ATOM | 1862 | CB  | CYX | 117 | 8.516  | 10.036 | 2.590  | 1.00 | 0.00 |
| ATOM | 1863 | HB2 | CYX | 117 | 7.743  | 10.024 | 1.822  | 1.00 | 0.00 |
| ATOM | 1864 | HB3 | CYX | 117 | 9.421  | 9.570  | 2.200  | 1.00 | 0.00 |
| ATOM | 1865 | SG  | CYX | 117 | 7.886  | 9.131  | 4.025  | 1.00 | 0.00 |
| ATOM | 1866 | C   | CYX | 117 | 9.393  | 12.233 | 1.789  | 1.00 | 0.00 |
| ATOM | 1867 | O   | CYX | 117 | 8.696  | 12.951 | 1.101  | 1.00 | 0.00 |
| ATOM | 1868 | N   | ASP | 118 | 10.663 | 12.072 | 1.530  | 1.00 | 0.00 |
| ATOM | 1869 | H   | ASP | 118 | 11.250 | 11.477 | 2.097  | 1.00 | 0.00 |
| ATOM | 1870 | CA  | ASP | 118 | 11.281 | 12.777 | 0.372  | 1.00 | 0.00 |
| ATOM | 1871 | HA  | ASP | 118 | 10.988 | 13.826 | 0.368  | 1.00 | 0.00 |
| ATOM | 1872 | CB  | ASP | 118 | 12.805 | 12.696 | 0.480  | 1.00 | 0.00 |
| ATOM | 1873 | HB2 | ASP | 118 | 13.116 | 11.651 | 0.492  | 1.00 | 0.00 |
| ATOM | 1874 | HB3 | ASP | 118 | 13.256 | 13.198 | -0.376 | 1.00 | 0.00 |
| ATOM | 1875 | CG  | ASP | 118 | 13.262 | 13.378 | 1.771  | 1.00 | 0.00 |
| ATOM | 1876 | OD1 | ASP | 118 | 12.468 | 14.103 | 2.348  | 1.00 | 0.00 |
| ATOM | 1877 | OD2 | ASP | 118 | 14.398 | 13.162 | 2.162  | 1.00 | 0.00 |
| ATOM | 1878 | C   | ASP | 118 | 10.825 | 12.115 | -0.930 | 1.00 | 0.00 |
| ATOM | 1879 | O   | ASP | 118 | 10.612 | 10.921 | -0.988 | 1.00 | 0.00 |

|      |      |      |     |     |        |        |        |      |      |
|------|------|------|-----|-----|--------|--------|--------|------|------|
| ATOM | 1880 | N    | LEU | 119 | 10.671 | 12.883 | -1.974 | 1.00 | 0.00 |
| ATOM | 1881 | H    | LEU | 119 | 10.846 | 13.876 | -1.933 | 1.00 | 0.00 |
| ATOM | 1882 | CA   | LEU | 119 | 10.226 | 12.297 | -3.269 | 1.00 | 0.00 |
| ATOM | 1883 | HA   | LEU | 119 | 9.414  | 11.589 | -3.105 | 1.00 | 0.00 |
| ATOM | 1884 | CB   | LEU | 119 | 9.724  | 13.414 | -4.186 | 1.00 | 0.00 |
| ATOM | 1885 | HB2  | LEU | 119 | 10.425 | 14.248 | -4.159 | 1.00 | 0.00 |
| ATOM | 1886 | HB3  | LEU | 119 | 9.643  | 13.040 | -5.207 | 1.00 | 0.00 |
| ATOM | 1887 | CG   | LEU | 119 | 8.350  | 13.887 | -3.706 | 1.00 | 0.00 |
| ATOM | 1888 | HG   | LEU | 119 | 7.743  | 13.023 | -3.434 | 1.00 | 0.00 |
| ATOM | 1889 | CD1  | LEU | 119 | 8.521  | 14.795 | -2.487 | 1.00 | 0.00 |
| ATOM | 1890 | HD11 | LEU | 119 | 9.128  | 15.658 | -2.759 | 1.00 | 0.00 |
| ATOM | 1891 | HD12 | LEU | 119 | 7.543  | 15.132 | -2.145 | 1.00 | 0.00 |
| ATOM | 1892 | HD13 | LEU | 119 | 9.015  | 14.242 | -1.688 | 1.00 | 0.00 |
| ATOM | 1893 | CD2  | LEU | 119 | 7.655  | 14.662 | -4.827 | 1.00 | 0.00 |
| ATOM | 1894 | HD21 | LEU | 119 | 7.533  | 14.014 | -5.695 | 1.00 | 0.00 |
| ATOM | 1895 | HD22 | LEU | 119 | 6.677  | 14.998 | -4.484 | 1.00 | 0.00 |
| ATOM | 1896 | HD23 | LEU | 119 | 8.260  | 15.526 | -5.101 | 1.00 | 0.00 |
| ATOM | 1897 | C    | LEU | 119 | 11.400 | 11.578 | -3.937 | 1.00 | 0.00 |
| ATOM | 1898 | O    | LEU | 119 | 11.219 | 10.732 | -4.789 | 1.00 | 0.00 |
| ATOM | 1899 | N    | ASP | 120 | 12.605 | 11.906 | -3.555 | 1.00 | 0.00 |
| ATOM | 1900 | H    | ASP | 120 | 12.766 | 12.609 | -2.848 | 1.00 | 0.00 |
| ATOM | 1901 | CA   | ASP | 120 | 13.787 | 11.238 | -4.169 | 1.00 | 0.00 |

|      |      |      |     |     |        |        |        |      |      |
|------|------|------|-----|-----|--------|--------|--------|------|------|
| ATOM | 1902 | HA   | ASP | 120 | 13.731 | 11.295 | -5.256 | 1.00 | 0.00 |
| ATOM | 1903 | CB   | ASP | 120 | 15.067 | 11.938 | -3.708 | 1.00 | 0.00 |
| ATOM | 1904 | HB2  | ASP | 120 | 15.930 | 11.466 | -4.178 | 1.00 | 0.00 |
| ATOM | 1905 | HB3  | ASP | 120 | 15.029 | 12.989 | -3.992 | 1.00 | 0.00 |
| ATOM | 1906 | CG   | ASP | 120 | 15.189 | 11.825 | -2.187 | 1.00 | 0.00 |
| ATOM | 1907 | OD1  | ASP | 120 | 14.179 | 11.581 | -1.547 | 1.00 | 0.00 |
| ATOM | 1908 | OD2  | ASP | 120 | 16.291 | 11.984 | -1.688 | 1.00 | 0.00 |
| ATOM | 1909 | C    | ASP | 120 | 13.824 | 9.770  | -3.740 | 1.00 | 0.00 |
| ATOM | 1910 | O    | ASP | 120 | 14.283 | 8.912  | -4.467 | 1.00 | 0.00 |
| ATOM | 1911 | N    | VAL | 121 | 13.346 | 9.475  | -2.562 | 1.00 | 0.00 |
| ATOM | 1912 | H    | VAL | 121 | 12.964 | 10.182 | -1.952 | 1.00 | 0.00 |
| ATOM | 1913 | CA   | VAL | 121 | 13.355 | 8.062  | -2.087 | 1.00 | 0.00 |
| ATOM | 1914 | HA   | VAL | 121 | 14.380 | 7.709  | -1.967 | 1.00 | 0.00 |
| ATOM | 1915 | CB   | VAL | 121 | 12.647 | 7.976  | -0.733 | 1.00 | 0.00 |
| ATOM | 1916 | HB   | VAL | 121 | 11.686 | 8.486  | -0.792 | 1.00 | 0.00 |
| ATOM | 1917 | CG1  | VAL | 121 | 12.422 | 6.507  | -0.367 | 1.00 | 0.00 |
| ATOM | 1918 | HG11 | VAL | 121 | 13.383 | 5.995  | -0.307 | 1.00 | 0.00 |
| ATOM | 1919 | HG12 | VAL | 121 | 11.918 | 6.445  | 0.597  | 1.00 | 0.00 |
| ATOM | 1920 | HG13 | VAL | 121 | 11.805 | 6.032  | -1.130 | 1.00 | 0.00 |
| ATOM | 1921 | CG2  | VAL | 121 | 13.514 | 8.641  | 0.338  | 1.00 | 0.00 |
| ATOM | 1922 | HG21 | VAL | 121 | 13.675 | 9.687  | 0.078  | 1.00 | 0.00 |
| ATOM | 1923 | HG22 | VAL | 121 | 13.011 | 8.580  | 1.303  | 1.00 | 0.00 |

|      |      |      |     |     |        |       |        |      |      |
|------|------|------|-----|-----|--------|-------|--------|------|------|
| ATOM | 1924 | HG23 | VAL | 121 | 14.475 | 8.129 | 0.397  | 1.00 | 0.00 |
| ATOM | 1925 | C    | VAL | 121 | 12.625 | 7.178 | -3.101 | 1.00 | 0.00 |
| ATOM | 1926 | O    | VAL | 121 | 13.098 | 6.123 | -3.473 | 1.00 | 0.00 |
| ATOM | 1927 | N    | SER | 122 | 11.477 | 7.601 | -3.552 | 1.00 | 0.00 |
| ATOM | 1928 | H    | SER | 122 | 11.078 | 8.477 | -3.247 | 1.00 | 0.00 |
| ATOM | 1929 | CA   | SER | 122 | 10.718 | 6.785 | -4.542 | 1.00 | 0.00 |
| ATOM | 1930 | HA   | SER | 122 | 10.460 | 5.816 | -4.114 | 1.00 | 0.00 |
| ATOM | 1931 | CB   | SER | 122 | 9.426  | 7.512 | -4.921 | 1.00 | 0.00 |
| ATOM | 1932 | HB2  | SER | 122 | 9.669  | 8.443 | -5.433 | 1.00 | 0.00 |
| ATOM | 1933 | HB3  | SER | 122 | 8.833  | 6.879 | -5.581 | 1.00 | 0.00 |
| ATOM | 1934 | OG   | SER | 122 | 8.682  | 7.798 | -3.746 | 1.00 | 0.00 |
| ATOM | 1935 | HG   | SER | 122 | 7.872  | 8.254 | -3.984 | 1.00 | 0.00 |
| ATOM | 1936 | C    | SER | 122 | 11.572 | 6.577 | -5.794 | 1.00 | 0.00 |
| ATOM | 1937 | O    | SER | 122 | 11.520 | 5.543 | -6.429 | 1.00 | 0.00 |
| ATOM | 1938 | N    | GLY | 123 | 12.359 | 7.554 | -6.156 | 1.00 | 0.00 |
| ATOM | 1939 | H    | GLY | 123 | 12.408 | 8.417 | -5.634 | 1.00 | 0.00 |
| ATOM | 1940 | CA   | GLY | 123 | 13.215 | 7.411 | -7.367 | 1.00 | 0.00 |
| ATOM | 1941 | HA2  | GLY | 123 | 12.725 | 6.763 | -8.094 | 1.00 | 0.00 |
| ATOM | 1942 | HA3  | GLY | 123 | 13.393 | 8.389 | -7.814 | 1.00 | 0.00 |
| ATOM | 1943 | C    | GLY | 123 | 14.557 | 6.792 | -6.974 | 1.00 | 0.00 |
| ATOM | 1944 | O    | GLY | 123 | 15.502 | 6.795 | -7.738 | 1.00 | 0.00 |
| ATOM | 1945 | N    | GLY | 124 | 14.649 | 6.257 | -5.786 | 1.00 | 0.00 |

|      |      |     |     |     |        |        |        |      |      |
|------|------|-----|-----|-----|--------|--------|--------|------|------|
| ATOM | 1946 | H   | GLY | 124 | 13.869 | 6.249  | -5.145 | 1.00 | 0.00 |
| ATOM | 1947 | CA  | GLY | 124 | 15.930 | 5.637  | -5.346 | 1.00 | 0.00 |
| ATOM | 1948 | HA2 | GLY | 124 | 16.738 | 6.366  | -5.410 | 1.00 | 0.00 |
| ATOM | 1949 | HA3 | GLY | 124 | 15.839 | 5.284  | -4.318 | 1.00 | 0.00 |
| ATOM | 1950 | C   | GLY | 124 | 16.260 | 4.449  | -6.252 | 1.00 | 0.00 |
| ATOM | 1951 | O   | GLY | 124 | 16.271 | 4.562  | -7.461 | 1.00 | 0.00 |
| ATOM | 1952 | N   | ARG | 125 | 16.529 | 3.308  | -5.676 | 1.00 | 0.00 |
| ATOM | 1953 | H   | ARG | 125 | 16.522 | 3.204  | -4.671 | 1.00 | 0.00 |
| ATOM | 1954 | CA  | ARG | 125 | 16.856 | 2.115  | -6.506 | 1.00 | 0.00 |
| ATOM | 1955 | HA  | ARG | 125 | 17.730 | 2.313  | -7.127 | 1.00 | 0.00 |
| ATOM | 1956 | CB  | ARG | 125 | 17.166 | 0.927  | -5.591 | 1.00 | 0.00 |
| ATOM | 1957 | HB2 | ARG | 125 | 16.341 | 0.778  | -4.895 | 1.00 | 0.00 |
| ATOM | 1958 | HB3 | ARG | 125 | 17.299 | 0.028  | -6.193 | 1.00 | 0.00 |
| ATOM | 1959 | CG  | ARG | 125 | 18.449 | 1.210  | -4.808 | 1.00 | 0.00 |
| ATOM | 1960 | HG2 | ARG | 125 | 19.248 | 1.473  | -5.501 | 1.00 | 0.00 |
| ATOM | 1961 | HG3 | ARG | 125 | 18.280 | 2.037  | -4.119 | 1.00 | 0.00 |
| ATOM | 1962 | CD  | ARG | 125 | 18.850 | -0.038 | -4.018 | 1.00 | 0.00 |
| ATOM | 1963 | HD2 | ARG | 125 | 17.997 | -0.423 | -3.460 | 1.00 | 0.00 |
| ATOM | 1964 | HD3 | ARG | 125 | 19.220 | -0.810 | -4.693 | 1.00 | 0.00 |
| ATOM | 1965 | NE  | ARG | 125 | 19.932 | 0.312  | -3.055 | 1.00 | 0.00 |
| ATOM | 1966 | HE  | ARG | 125 | 19.866 | 1.124  | -2.458 | 1.00 | 0.00 |
| ATOM | 1967 | CZ  | ARG | 125 | 20.996 | -0.438 | -2.969 | 1.00 | 0.00 |

|      |      |      |     |     |        |        |         |      |      |
|------|------|------|-----|-----|--------|--------|---------|------|------|
| ATOM | 1968 | NH1  | ARG | 125 | 21.598 | -0.844 | -4.054  | 1.00 | 0.00 |
| ATOM | 1969 | HH11 | ARG | 125 | 21.238 | -0.576 | -4.959  | 1.00 | 0.00 |
| ATOM | 1970 | HH12 | ARG | 125 | 22.422 | -1.425 | -3.984  | 1.00 | 0.00 |
| ATOM | 1971 | NH2  | ARG | 125 | 21.459 | -0.783 | -1.799  | 1.00 | 0.00 |
| ATOM | 1972 | HH21 | ARG | 125 | 20.992 | -0.468 | -0.961  | 1.00 | 0.00 |
| ATOM | 1973 | HH22 | ARG | 125 | 22.283 | -1.364 | -1.737  | 1.00 | 0.00 |
| ATOM | 1974 | C    | ARG | 125 | 15.661 | 1.773  | -7.398  | 1.00 | 0.00 |
| ATOM | 1975 | O    | ARG | 125 | 15.817 | 1.286  | -8.502  | 1.00 | 0.00 |
| ATOM | 1976 | N    | CYX | 126 | 14.470 | 2.024  | -6.932  | 1.00 | 0.00 |
| ATOM | 1977 | H    | CYX | 126 | 14.334 | 2.428  | -6.017  | 1.00 | 0.00 |
| ATOM | 1978 | CA   | CYX | 126 | 13.266 | 1.714  | -7.754  | 1.00 | 0.00 |
| ATOM | 1979 | HA   | CYX | 126 | 13.243 | 0.654  | -8.007  | 1.00 | 0.00 |
| ATOM | 1980 | CB   | CYX | 126 | 12.005 | 2.054  | -6.958  | 1.00 | 0.00 |
| ATOM | 1981 | HB2  | CYX | 126 | 12.070 | 3.079  | -6.595  | 1.00 | 0.00 |
| ATOM | 1982 | HB3  | CYX | 126 | 11.131 | 1.950  | -7.600  | 1.00 | 0.00 |
| ATOM | 1983 | SG   | CYX | 126 | 11.889 | 0.965  | -5.518  | 1.00 | 0.00 |
| ATOM | 1984 | C    | CYX | 126 | 13.300 | 2.546  | -9.038  | 1.00 | 0.00 |
| ATOM | 1985 | O    | CYX | 126 | 12.694 | 2.196  | -10.032 | 1.00 | 0.00 |
| ATOM | 1986 | N    | SER | 127 | 14.005 | 3.643  | -9.026  | 1.00 | 0.00 |
| ATOM | 1987 | H    | SER | 127 | 14.513 | 3.937  | -8.204  | 1.00 | 0.00 |
| ATOM | 1988 | CA   | SER | 127 | 14.079 | 4.496  | -10.245 | 1.00 | 0.00 |
| ATOM | 1989 | HA   | SER | 127 | 14.752 | 5.337  | -10.078 | 1.00 | 0.00 |



|      |      |     |     |     |        |       |         |      |      |
|------|------|-----|-----|-----|--------|-------|---------|------|------|
| ATOM | 1990 | CB  | SER | 127 | 14.613 | 3.668 | -11.416 | 1.00 | 0.00 |
| ATOM | 1991 | HB2 | SER | 127 | 15.693 | 3.795 | -11.489 | 1.00 | 0.00 |
| ATOM | 1992 | HB3 | SER | 127 | 14.383 | 2.615 | -11.252 | 1.00 | 0.00 |
| ATOM | 1993 | OG  | SER | 127 | 14.003 | 4.103 | -12.622 | 1.00 | 0.00 |
| ATOM | 1994 | HG  | SER | 127 | 14.339 | 3.583 | -13.356 | 1.00 | 0.00 |
| ATOM | 1995 | C   | SER | 127 | 12.681 | 5.018 | -10.588 | 1.00 | 0.00 |
| ATOM | 1996 | O   | SER | 127 | 11.732 | 4.556 | -9.977  | 1.00 | 0.00 |
| ATOM | 1997 | OXT | SER | 127 | 12.585 | 5.873 | -11.453 | 1.00 | 0.00 |

TER

|      |      |    |     |     |         |        |       |      |      |
|------|------|----|-----|-----|---------|--------|-------|------|------|
| ATOM | 1998 | S1 | LIG | 128 | -25.710 | 13.916 | 1.899 | 1.00 | 0.00 |
| ATOM | 1999 | S2 | LIG | 128 | -18.259 | 14.566 | 3.990 | 1.00 | 0.00 |
| ATOM | 2000 | O1 | LIG | 128 | -21.981 | 16.533 | 7.094 | 1.00 | 0.00 |
| ATOM | 2001 | H5 | LIG | 128 | -21.131 | 16.671 | 7.564 | 1.00 | 0.00 |
| ATOM | 2002 | O2 | LIG | 128 | -26.488 | 15.167 | 1.261 | 1.00 | 0.00 |
| ATOM | 2003 | H6 | LIG | 128 | -26.963 | 15.572 | 2.048 | 1.00 | 0.00 |
| ATOM | 2004 | O3 | LIG | 128 | -17.683 | 13.629 | 5.162 | 1.00 | 0.00 |
| ATOM | 2005 | H7 | LIG | 128 | -17.742 | 14.202 | 5.980 | 1.00 | 0.00 |
| ATOM | 2006 | O4 | LIG | 128 | -24.895 | 13.348 | 0.845 | 1.00 | 0.00 |
| ATOM | 2007 | O5 | LIG | 128 | -26.636 | 13.089 | 2.659 | 1.00 | 0.00 |
| ATOM | 2008 | O6 | LIG | 128 | -18.307 | 13.756 | 2.790 | 1.00 | 0.00 |
| ATOM | 2009 | O7 | LIG | 128 | -17.575 | 15.850 | 4.006 | 1.00 | 0.00 |
| ATOM | 2010 | O8 | LIG | 128 | -32.758 | 16.967 | 6.620 | 1.00 | 0.00 |

|      |      |     |     |     |         |        |       |      |      |
|------|------|-----|-----|-----|---------|--------|-------|------|------|
| ATOM | 2011 | O9  | LIG | 128 | -33.288 | 17.432 | 4.566 | 1.00 | 0.00 |
| ATOM | 2012 | N1  | LIG | 128 | -24.503 | 16.597 | 6.270 | 1.00 | 0.00 |
| ATOM | 2013 | H3  | LIG | 128 | -23.865 | 16.851 | 7.008 | 1.00 | 0.00 |
| ATOM | 2014 | H4  | LIG | 128 | -25.493 | 16.774 | 6.347 | 1.00 | 0.00 |
| ATOM | 2015 | N2  | LIG | 128 | -26.330 | 15.835 | 4.581 | 1.00 | 0.00 |
| ATOM | 2016 | N3  | LIG | 128 | -19.517 | 15.966 | 6.803 | 1.00 | 0.00 |
| ATOM | 2017 | N4  | LIG | 128 | -27.256 | 15.846 | 3.719 | 1.00 | 0.00 |
| ATOM | 2018 | N5  | LIG | 128 | -18.349 | 15.516 | 6.957 | 1.00 | 0.00 |
| ATOM | 2019 | N6  | LIG | 128 | -32.496 | 17.073 | 5.427 | 1.00 | 0.00 |
| ATOM | 2020 | C1  | LIG | 128 | -22.689 | 15.543 | 5.033 | 1.00 | 0.00 |
| ATOM | 2021 | C2  | LIG | 128 | -22.301 | 14.831 | 3.863 | 1.00 | 0.00 |
| ATOM | 2022 | C3  | LIG | 128 | -24.084 | 15.873 | 5.218 | 1.00 | 0.00 |
| ATOM | 2023 | C4  | LIG | 128 | -24.599 | 14.716 | 3.100 | 1.00 | 0.00 |
| ATOM | 2024 | C5  | LIG | 128 | -23.277 | 14.421 | 2.921 | 1.00 | 0.00 |
| ATOM | 2025 | H1  | LIG | 128 | -22.973 | 13.845 | 2.057 | 1.00 | 0.00 |
| ATOM | 2026 | C6  | LIG | 128 | -21.666 | 15.881 | 5.956 | 1.00 | 0.00 |
| ATOM | 2027 | C7  | LIG | 128 | -19.965 | 14.864 | 4.536 | 1.00 | 0.00 |
| ATOM | 2028 | C8  | LIG | 128 | -20.937 | 14.522 | 3.635 | 1.00 | 0.00 |
| ATOM | 2029 | H2  | LIG | 128 | -20.655 | 14.015 | 2.721 | 1.00 | 0.00 |
| ATOM | 2030 | C9  | LIG | 128 | -25.049 | 15.461 | 4.239 | 1.00 | 0.00 |
| ATOM | 2031 | C10 | LIG | 128 | -20.309 | 15.539 | 5.746 | 1.00 | 0.00 |
| ATOM | 2032 | C11 | LIG | 128 | -28.543 | 16.145 | 4.207 | 1.00 | 0.00 |

|      |      |     |     |     |         |         |        |      |      |
|------|------|-----|-----|-----|---------|---------|--------|------|------|
| ATOM | 2033 | C12 | LIG | 128 | -17.598 | 16.049  | 8.022  | 1.00 | 0.00 |
| ATOM | 2034 | C13 | LIG | 128 | -28.904 | 16.031  | 5.561  | 1.00 | 0.00 |
| ATOM | 2035 | H8  | LIG | 128 | -28.176 | 15.680  | 6.279  | 1.00 | 0.00 |
| ATOM | 2036 | C14 | LIG | 128 | -29.497 | 16.533  | 3.257  | 1.00 | 0.00 |
| ATOM | 2037 | H9  | LIG | 128 | -29.217 | 16.594  | 2.213  | 1.00 | 0.00 |
| ATOM | 2038 | C15 | LIG | 128 | -30.195 | 16.336  | 5.959  | 1.00 | 0.00 |
| ATOM | 2039 | H10 | LIG | 128 | -30.503 | 16.249  | 6.992  | 1.00 | 0.00 |
| ATOM | 2040 | C16 | LIG | 128 | -30.790 | 16.846  | 3.651  | 1.00 | 0.00 |
| ATOM | 2041 | H11 | LIG | 128 | -31.539 | 17.158  | 2.937  | 1.00 | 0.00 |
| ATOM | 2042 | C17 | LIG | 128 | -31.119 | 16.748  | 5.000  | 1.00 | 0.00 |
| ATOM | 2043 | C18 | LIG | 128 | -17.930 | 17.232  | 8.704  | 1.00 | 0.00 |
| ATOM | 2044 | H12 | LIG | 128 | -18.795 | 17.804  | 8.396  | 1.00 | 0.00 |
| ATOM | 2045 | C19 | LIG | 128 | -16.440 | 15.339  | 8.372  | 1.00 | 0.00 |
| ATOM | 2046 | H13 | LIG | 128 | -16.180 | 14.443  | 7.822  | 1.00 | 0.00 |
| ATOM | 2047 | C20 | LIG | 128 | -17.123 | 17.672  | 9.741  | 1.00 | 0.00 |
| ATOM | 2048 | H14 | LIG | 128 | -17.370 | 18.590  | 10.263 | 1.00 | 0.00 |
| ATOM | 2049 | C21 | LIG | 128 | -15.643 | 15.784  | 9.420  | 1.00 | 0.00 |
| ATOM | 2050 | H15 | LIG | 128 | -14.755 | 15.228  | 9.694  | 1.00 | 0.00 |
| ATOM | 2051 | C22 | LIG | 128 | -15.983 | 16.948  | 10.108 | 1.00 | 0.00 |
| ATOM | 2052 | H16 | LIG | 128 | -15.356 | 17.302  | 10.918 | 1.00 | 0.00 |
| TER  |      |     |     |     |         |         |        |      |      |
| ATOM | 2053 | S1  | LIG | 129 | 19.780  | -14.706 | 25.788 | 1.00 | 0.00 |

|      |      |    |     |     |        |         |        |      |      |
|------|------|----|-----|-----|--------|---------|--------|------|------|
| ATOM | 2054 | S2 | LIG | 129 | 19.368 | -7.030  | 26.890 | 1.00 | 0.00 |
| ATOM | 2055 | O1 | LIG | 129 | 23.476 | -9.046  | 24.356 | 1.00 | 0.00 |
| ATOM | 2056 | H5 | LIG | 129 | 23.594 | -8.072  | 24.337 | 1.00 | 0.00 |
| ATOM | 2057 | O2 | LIG | 129 | 20.729 | -15.611 | 26.713 | 1.00 | 0.00 |
| ATOM | 2058 | H6 | LIG | 129 | 21.569 | -15.699 | 26.170 | 1.00 | 0.00 |
| ATOM | 2059 | O3 | LIG | 129 | 18.991 | -6.073  | 25.655 | 1.00 | 0.00 |
| ATOM | 2060 | H7 | LIG | 129 | 19.877 | -5.762  | 25.311 | 1.00 | 0.00 |
| ATOM | 2061 | O4 | LIG | 129 | 18.587 | -14.425 | 26.559 | 1.00 | 0.00 |
| ATOM | 2062 | O5 | LIG | 129 | 19.692 | -15.280 | 24.453 | 1.00 | 0.00 |
| ATOM | 2063 | O6 | LIG | 129 | 18.129 | -7.607  | 27.369 | 1.00 | 0.00 |
| ATOM | 2064 | O7 | LIG | 129 | 20.273 | -6.333  | 27.792 | 1.00 | 0.00 |
| ATOM | 2065 | O8 | LIG | 129 | 26.441 | -19.033 | 21.524 | 1.00 | 0.00 |
| ATOM | 2066 | O9 | LIG | 129 | 25.989 | -20.333 | 23.204 | 1.00 | 0.00 |
| ATOM | 2067 | N1 | LIG | 129 | 23.798 | -11.677 | 24.227 | 1.00 | 0.00 |
| ATOM | 2068 | H3 | LIG | 129 | 24.195 | -10.781 | 23.995 | 1.00 | 0.00 |
| ATOM | 2069 | H4 | LIG | 129 | 24.242 | -12.537 | 23.947 | 1.00 | 0.00 |
| ATOM | 2070 | N2 | LIG | 129 | 22.832 | -14.072 | 24.545 | 1.00 | 0.00 |
| ATOM | 2071 | N3 | LIG | 129 | 22.216 | -6.950  | 25.060 | 1.00 | 0.00 |
| ATOM | 2072 | N4 | LIG | 129 | 22.673 | -15.268 | 24.926 | 1.00 | 0.00 |
| ATOM | 2073 | N5 | LIG | 129 | 21.605 | -5.847  | 25.070 | 1.00 | 0.00 |
| ATOM | 2074 | N6 | LIG | 129 | 25.891 | -19.277 | 22.592 | 1.00 | 0.00 |
| ATOM | 2075 | C1 | LIG | 129 | 21.848 | -10.586 | 25.196 | 1.00 | 0.00 |

|      |      |     |     |     |        |         |        |      |      |
|------|------|-----|-----|-----|--------|---------|--------|------|------|
| ATOM | 2076 | C2  | LIG | 129 | 20.590 | -10.748 | 25.843 | 1.00 | 0.00 |
| ATOM | 2077 | C3  | LIG | 129 | 22.579 | -11.764 | 24.787 | 1.00 | 0.00 |
| ATOM | 2078 | C4  | LIG | 129 | 20.733 | -13.161 | 25.642 | 1.00 | 0.00 |
| ATOM | 2079 | C5  | LIG | 129 | 20.053 | -12.045 | 26.043 | 1.00 | 0.00 |
| ATOM | 2080 | H1  | LIG | 129 | 19.077 | -12.151 | 26.499 | 1.00 | 0.00 |
| ATOM | 2081 | C6  | LIG | 129 | 22.303 | -9.259  | 24.988 | 1.00 | 0.00 |
| ATOM | 2082 | C7  | LIG | 129 | 20.326 | -8.344  | 26.083 | 1.00 | 0.00 |
| ATOM | 2083 | C8  | LIG | 129 | 19.865 | -9.616  | 26.288 | 1.00 | 0.00 |
| ATOM | 2084 | H2  | LIG | 129 | 18.929 | -9.760  | 26.814 | 1.00 | 0.00 |
| ATOM | 2085 | C9  | LIG | 129 | 22.019 | -13.065 | 25.017 | 1.00 | 0.00 |
| ATOM | 2086 | C10 | LIG | 129 | 21.560 | -8.127  | 25.399 | 1.00 | 0.00 |
| ATOM | 2087 | C11 | LIG | 129 | 23.494 | -16.225 | 24.298 | 1.00 | 0.00 |
| ATOM | 2088 | C12 | LIG | 129 | 22.363 | -4.699  | 24.770 | 1.00 | 0.00 |
| ATOM | 2089 | C13 | LIG | 129 | 24.139 | -16.005 | 23.069 | 1.00 | 0.00 |
| ATOM | 2090 | H8  | LIG | 129 | 23.996 | -15.066 | 22.552 | 1.00 | 0.00 |
| ATOM | 2091 | C14 | LIG | 129 | 23.616 | -17.463 | 24.943 | 1.00 | 0.00 |
| ATOM | 2092 | H9  | LIG | 129 | 23.095 | -17.632 | 25.877 | 1.00 | 0.00 |
| ATOM | 2093 | C15 | LIG | 129 | 24.923 | -17.002 | 22.513 | 1.00 | 0.00 |
| ATOM | 2094 | H10 | LIG | 129 | 25.424 | -16.864 | 21.564 | 1.00 | 0.00 |
| ATOM | 2095 | C16 | LIG | 129 | 24.406 | -18.463 | 24.394 | 1.00 | 0.00 |
| ATOM | 2096 | H11 | LIG | 129 | 24.524 | -19.422 | 24.879 | 1.00 | 0.00 |
| ATOM | 2097 | C17 | LIG | 129 | 25.053 | -18.215 | 23.187 | 1.00 | 0.00 |

|      |      |     |     |     |        |        |        |      |      |
|------|------|-----|-----|-----|--------|--------|--------|------|------|
| ATOM | 2098 | C18 | LIG | 129 | 23.768 | -4.660 | 24.776 | 1.00 | 0.00 |
| ATOM | 2099 | H12 | LIG | 129 | 24.328 | -5.545 | 25.049 | 1.00 | 0.00 |
| ATOM | 2100 | C19 | LIG | 129 | 21.631 | -3.538 | 24.483 | 1.00 | 0.00 |
| ATOM | 2101 | H13 | LIG | 129 | 20.549 | -3.573 | 24.507 | 1.00 | 0.00 |
| ATOM | 2102 | C20 | LIG | 129 | 24.421 | -3.478 | 24.465 | 1.00 | 0.00 |
| ATOM | 2103 | H14 | LIG | 129 | 25.504 | -3.441 | 24.478 | 1.00 | 0.00 |
| ATOM | 2104 | C21 | LIG | 129 | 22.295 | -2.360 | 24.162 | 1.00 | 0.00 |
| ATOM | 2105 | H15 | LIG | 129 | 21.727 | -1.467 | 23.932 | 1.00 | 0.00 |
| ATOM | 2106 | C22 | LIG | 129 | 23.689 | -2.327 | 24.150 | 1.00 | 0.00 |
| ATOM | 2107 | H16 | LIG | 129 | 24.208 | -1.406 | 23.913 | 1.00 | 0.00 |

TER

|      |      |    |     |     |         |         |        |      |      |
|------|------|----|-----|-----|---------|---------|--------|------|------|
| ATOM | 2108 | S1 | LIG | 130 | -29.853 | -15.797 | -5.583 | 1.00 | 0.00 |
| ATOM | 2109 | S2 | LIG | 130 | -22.573 | -14.040 | -3.527 | 1.00 | 0.00 |
| ATOM | 2110 | O1 | LIG | 130 | -23.925 | -19.052 | -4.166 | 1.00 | 0.00 |
| ATOM | 2111 | H5 | LIG | 130 | -22.965 | -19.051 | -3.965 | 1.00 | 0.00 |
| ATOM | 2112 | O2 | LIG | 130 | -30.902 | -16.327 | -4.490 | 1.00 | 0.00 |
| ATOM | 2113 | H6 | LIG | 130 | -30.856 | -17.325 | -4.588 | 1.00 | 0.00 |
| ATOM | 2114 | O3 | LIG | 130 | -21.397 | -14.149 | -4.617 | 1.00 | 0.00 |
| ATOM | 2115 | H7 | LIG | 130 | -20.999 | -15.052 | -4.453 | 1.00 | 0.00 |
| ATOM | 2116 | O4 | LIG | 130 | -29.766 | -14.360 | -5.418 | 1.00 | 0.00 |
| ATOM | 2117 | O5 | LIG | 130 | -30.148 | -16.385 | -6.881 | 1.00 | 0.00 |
| ATOM | 2118 | O6 | LIG | 130 | -23.268 | -12.794 | -3.782 | 1.00 | 0.00 |

|      |      |    |     |     |         |         |        |      |      |
|------|------|----|-----|-----|---------|---------|--------|------|------|
| ATOM | 2119 | O7 | LIG | 130 | -22.051 | -14.355 | -2.207 | 1.00 | 0.00 |
| ATOM | 2120 | O8 | LIG | 130 | -33.050 | -24.118 | -6.930 | 1.00 | 0.00 |
| ATOM | 2121 | O9 | LIG | 130 | -34.674 | -23.115 | -5.896 | 1.00 | 0.00 |
| ATOM | 2122 | N1 | LIG | 130 | -26.466 | -19.702 | -4.570 | 1.00 | 0.00 |
| ATOM | 2123 | H3 | LIG | 130 | -25.532 | -20.054 | -4.438 | 1.00 | 0.00 |
| ATOM | 2124 | H4 | LIG | 130 | -27.240 | -20.323 | -4.752 | 1.00 | 0.00 |
| ATOM | 2125 | N2 | LIG | 130 | -28.901 | -18.984 | -5.143 | 1.00 | 0.00 |
| ATOM | 2126 | N3 | LIG | 130 | -22.050 | -17.374 | -3.786 | 1.00 | 0.00 |
| ATOM | 2127 | N4 | LIG | 130 | -30.153 | -18.812 | -5.086 | 1.00 | 0.00 |
| ATOM | 2128 | N5 | LIG | 130 | -20.988 | -16.700 | -3.876 | 1.00 | 0.00 |
| ATOM | 2129 | N6 | LIG | 130 | -33.520 | -23.180 | -6.297 | 1.00 | 0.00 |
| ATOM | 2130 | C1 | LIG | 130 | -25.646 | -17.413 | -4.448 | 1.00 | 0.00 |
| ATOM | 2131 | C2 | LIG | 130 | -25.969 | -16.027 | -4.495 | 1.00 | 0.00 |
| ATOM | 2132 | C3 | LIG | 130 | -26.697 | -18.381 | -4.663 | 1.00 | 0.00 |
| ATOM | 2133 | C4 | LIG | 130 | -28.286 | -16.526 | -5.009 | 1.00 | 0.00 |
| ATOM | 2134 | C5 | LIG | 130 | -27.293 | -15.613 | -4.788 | 1.00 | 0.00 |
| ATOM | 2135 | H1 | LIG | 130 | -27.516 | -14.556 | -4.861 | 1.00 | 0.00 |
| ATOM | 2136 | C6 | LIG | 130 | -24.293 | -17.754 | -4.195 | 1.00 | 0.00 |
| ATOM | 2137 | C7 | LIG | 130 | -23.671 | -15.404 | -4.006 | 1.00 | 0.00 |
| ATOM | 2138 | C8 | LIG | 130 | -24.971 | -15.052 | -4.254 | 1.00 | 0.00 |
| ATOM | 2139 | H2 | LIG | 130 | -25.242 | -14.004 | -4.255 | 1.00 | 0.00 |
| ATOM | 2140 | C9 | LIG | 130 | -28.032 | -17.934 | -4.941 | 1.00 | 0.00 |

|      |      |     |     |     |         |         |        |      |      |
|------|------|-----|-----|-----|---------|---------|--------|------|------|
| ATOM | 2141 | C10 | LIG | 130 | -23.288 | -16.779 | -3.993 | 1.00 | 0.00 |
| ATOM | 2142 | C11 | LIG | 130 | -30.940 | -19.933 | -5.412 | 1.00 | 0.00 |
| ATOM | 2143 | C12 | LIG | 130 | -19.783 | -17.372 | -3.593 | 1.00 | 0.00 |
| ATOM | 2144 | C13 | LIG | 130 | -30.460 | -21.031 | -6.145 | 1.00 | 0.00 |
| ATOM | 2145 | H8  | LIG | 130 | -29.439 | -21.027 | -6.504 | 1.00 | 0.00 |
| ATOM | 2146 | C14 | LIG | 130 | -32.281 | -19.896 | -5.001 | 1.00 | 0.00 |
| ATOM | 2147 | H9  | LIG | 130 | -32.649 | -19.035 | -4.459 | 1.00 | 0.00 |
| ATOM | 2148 | C15 | LIG | 130 | -31.302 | -22.092 | -6.433 | 1.00 | 0.00 |
| ATOM | 2149 | H10 | LIG | 130 | -30.962 | -22.945 | -7.003 | 1.00 | 0.00 |
| ATOM | 2150 | C16 | LIG | 130 | -33.127 | -20.960 | -5.281 | 1.00 | 0.00 |
| ATOM | 2151 | H11 | LIG | 130 | -34.160 | -20.958 | -4.965 | 1.00 | 0.00 |
| ATOM | 2152 | C17 | LIG | 130 | -32.623 | -22.046 | -5.989 | 1.00 | 0.00 |
| ATOM | 2153 | C18 | LIG | 130 | -19.710 | -18.609 | -2.931 | 1.00 | 0.00 |
| ATOM | 2154 | H12 | LIG | 130 | -20.616 | -19.086 | -2.581 | 1.00 | 0.00 |
| ATOM | 2155 | C19 | LIG | 130 | -18.608 | -16.717 | -3.987 | 1.00 | 0.00 |
| ATOM | 2156 | H13 | LIG | 130 | -18.675 | -15.752 | -4.474 | 1.00 | 0.00 |
| ATOM | 2157 | C20 | LIG | 130 | -18.472 | -19.189 | -2.700 | 1.00 | 0.00 |
| ATOM | 2158 | H14 | LIG | 130 | -18.411 | -20.138 | -2.180 | 1.00 | 0.00 |
| ATOM | 2159 | C21 | LIG | 130 | -17.372 | -17.312 | -3.761 | 1.00 | 0.00 |
| ATOM | 2160 | H15 | LIG | 130 | -16.467 | -16.808 | -4.075 | 1.00 | 0.00 |
| ATOM | 2161 | C22 | LIG | 130 | -17.301 | -18.548 | -3.120 | 1.00 | 0.00 |
| ATOM | 2162 | H16 | LIG | 130 | -16.337 | -19.006 | -2.931 | 1.00 | 0.00 |



TER

|      |      |    |     |     |         |        |         |      |      |
|------|------|----|-----|-----|---------|--------|---------|------|------|
| ATOM | 2163 | S1 | LIG | 131 | -25.080 | 10.800 | -25.570 | 1.00 | 0.00 |
| ATOM | 2164 | S2 | LIG | 131 | -20.512 | 16.725 | -27.655 | 1.00 | 0.00 |
| ATOM | 2165 | O1 | LIG | 131 | -25.672 | 17.055 | -28.446 | 1.00 | 0.00 |
| ATOM | 2166 | H5 | LIG | 131 | -25.297 | 17.917 | -28.725 | 1.00 | 0.00 |
| ATOM | 2167 | O2 | LIG | 131 | -25.631 | 9.771  | -26.672 | 1.00 | 0.00 |
| ATOM | 2168 | H6 | LIG | 131 | -26.546 | 10.126 | -26.886 | 1.00 | 0.00 |
| ATOM | 2169 | O3 | LIG | 131 | -20.496 | 18.061 | -26.763 | 1.00 | 0.00 |
| ATOM | 2170 | H7 | LIG | 131 | -21.138 | 18.671 | -27.229 | 1.00 | 0.00 |
| ATOM | 2171 | O4 | LIG | 131 | -23.707 | 10.427 | -25.298 | 1.00 | 0.00 |
| ATOM | 2172 | O5 | LIG | 131 | -26.046 | 10.938 | -24.490 | 1.00 | 0.00 |
| ATOM | 2173 | O6 | LIG | 131 | -19.683 | 15.753 | -26.971 | 1.00 | 0.00 |
| ATOM | 2174 | O7 | LIG | 131 | -20.282 | 17.063 | -29.051 | 1.00 | 0.00 |
| ATOM | 2175 | O8 | LIG | 131 | -34.039 | 10.509 | -26.525 | 1.00 | 0.00 |
| ATOM | 2176 | O9 | LIG | 131 | -33.410 | 8.499  | -27.052 | 1.00 | 0.00 |
| ATOM | 2177 | N1 | LIG | 131 | -27.219 | 14.940 | -28.028 | 1.00 | 0.00 |
| ATOM | 2178 | H3 | LIG | 131 | -27.190 | 15.895 | -28.346 | 1.00 | 0.00 |
| ATOM | 2179 | H4 | LIG | 131 | -28.088 | 14.431 | -27.972 | 1.00 | 0.00 |
| ATOM | 2180 | N2 | LIG | 131 | -27.534 | 12.552 | -27.042 | 1.00 | 0.00 |
| ATOM | 2181 | N3 | LIG | 131 | -23.424 | 18.247 | -28.470 | 1.00 | 0.00 |
| ATOM | 2182 | N4 | LIG | 131 | -27.784 | 11.317 | -26.929 | 1.00 | 0.00 |
| ATOM | 2183 | N5 | LIG | 131 | -22.480 | 19.061 | -28.278 | 1.00 | 0.00 |

|      |      |     |     |     |         |        |         |      |      |
|------|------|-----|-----|-----|---------|--------|---------|------|------|
| ATOM | 2184 | N6  | LIG | 131 | -33.184 | 9.674  | -26.798 | 1.00 | 0.00 |
| ATOM | 2185 | C1  | LIG | 131 | -24.838 | 15.010 | -27.523 | 1.00 | 0.00 |
| ATOM | 2186 | C2  | LIG | 131 | -23.703 | 14.307 | -27.028 | 1.00 | 0.00 |
| ATOM | 2187 | C3  | LIG | 131 | -26.124 | 14.351 | -27.517 | 1.00 | 0.00 |
| ATOM | 2188 | C4  | LIG | 131 | -25.066 | 12.378 | -26.480 | 1.00 | 0.00 |
| ATOM | 2189 | C5  | LIG | 131 | -23.848 | 12.998 | -26.503 | 1.00 | 0.00 |
| ATOM | 2190 | H1  | LIG | 131 | -22.984 | 12.491 | -26.093 | 1.00 | 0.00 |
| ATOM | 2191 | C6  | LIG | 131 | -24.627 | 16.333 | -27.991 | 1.00 | 0.00 |
| ATOM | 2192 | C7  | LIG | 131 | -22.240 | 16.187 | -27.514 | 1.00 | 0.00 |
| ATOM | 2193 | C8  | LIG | 131 | -22.422 | 14.911 | -27.052 | 1.00 | 0.00 |
| ATOM | 2194 | H2  | LIG | 131 | -21.564 | 14.347 | -26.709 | 1.00 | 0.00 |
| ATOM | 2195 | C9  | LIG | 131 | -26.239 | 13.019 | -26.995 | 1.00 | 0.00 |
| ATOM | 2196 | C10 | LIG | 131 | -23.354 | 16.949 | -27.979 | 1.00 | 0.00 |
| ATOM | 2197 | C11 | LIG | 131 | -29.149 | 10.970 | -26.888 | 1.00 | 0.00 |
| ATOM | 2198 | C12 | LIG | 131 | -22.611 | 20.335 | -28.861 | 1.00 | 0.00 |
| ATOM | 2199 | C13 | LIG | 131 | -30.171 | 11.880 | -26.570 | 1.00 | 0.00 |
| ATOM | 2200 | H8  | LIG | 131 | -29.916 | 12.902 | -26.323 | 1.00 | 0.00 |
| ATOM | 2201 | C14 | LIG | 131 | -29.460 | 9.627  | -27.143 | 1.00 | 0.00 |
| ATOM | 2202 | H9  | LIG | 131 | -28.663 | 8.927  | -27.362 | 1.00 | 0.00 |
| ATOM | 2203 | C15 | LIG | 131 | -31.489 | 11.457 | -26.542 | 1.00 | 0.00 |
| ATOM | 2204 | H10 | LIG | 131 | -32.294 | 12.133 | -26.292 | 1.00 | 0.00 |
| ATOM | 2205 | C16 | LIG | 131 | -30.779 | 9.199  | -27.123 | 1.00 | 0.00 |

|      |      |     |     |     |         |        |         |      |      |
|------|------|-----|-----|-----|---------|--------|---------|------|------|
| ATOM | 2206 | H11 | LIG | 131 | -31.044 | 8.171  | -27.327 | 1.00 | 0.00 |
| ATOM | 2207 | C17 | LIG | 131 | -31.777 | 10.123 | -26.827 | 1.00 | 0.00 |
| ATOM | 2208 | C18 | LIG | 131 | -23.536 | 20.646 | -29.871 | 1.00 | 0.00 |
| ATOM | 2209 | H12 | LIG | 131 | -24.183 | 19.873 | -30.264 | 1.00 | 0.00 |
| ATOM | 2210 | C19 | LIG | 131 | -21.724 | 21.317 | -28.396 | 1.00 | 0.00 |
| ATOM | 2211 | H13 | LIG | 131 | -20.997 | 21.059 | -27.635 | 1.00 | 0.00 |
| ATOM | 2212 | C20 | LIG | 131 | -23.586 | 21.935 | -30.380 | 1.00 | 0.00 |
| ATOM | 2213 | H14 | LIG | 131 | -24.291 | 22.176 | -31.166 | 1.00 | 0.00 |
| ATOM | 2214 | C21 | LIG | 131 | -21.789 | 22.609 | -28.905 | 1.00 | 0.00 |
| ATOM | 2215 | H15 | LIG | 131 | -21.109 | 23.367 | -28.537 | 1.00 | 0.00 |
| ATOM | 2216 | C22 | LIG | 131 | -22.720 | 22.921 | -29.895 | 1.00 | 0.00 |
| ATOM | 2217 | H16 | LIG | 131 | -22.763 | 23.925 | -30.301 | 1.00 | 0.00 |
| TER  |      |     |     |     |         |        |         |      |      |
| ATOM | 2218 | S1  | LIG | 132 | 12.811  | -2.570 | -24.256 | 1.00 | 0.00 |
| ATOM | 2219 | S2  | LIG | 132 | 19.012  | 0.564  | -27.724 | 1.00 | 0.00 |
| ATOM | 2220 | O1  | LIG | 132 | 14.301  | 1.061  | -29.942 | 1.00 | 0.00 |
| ATOM | 2221 | H5  | LIG | 132 | 14.923  | 1.568  | -30.506 | 1.00 | 0.00 |
| ATOM | 2222 | O2  | LIG | 132 | 12.197  | -3.955 | -24.784 | 1.00 | 0.00 |
| ATOM | 2223 | H6  | LIG | 132 | 11.449  | -3.664 | -25.388 | 1.00 | 0.00 |
| ATOM | 2224 | O3  | LIG | 132 | 19.227  | 2.156  | -27.669 | 1.00 | 0.00 |
| ATOM | 2225 | H7  | LIG | 132 | 18.845  | 2.482  | -28.534 | 1.00 | 0.00 |
| ATOM | 2226 | O4  | LIG | 132 | 13.982  | -2.903 | -23.471 | 1.00 | 0.00 |

|      |      |    |     |     |        |        |         |      |      |
|------|------|----|-----|-----|--------|--------|---------|------|------|
| ATOM | 2227 | O5 | LIG | 132 | 11.753 | -1.734 | -23.706 | 1.00 | 0.00 |
| ATOM | 2228 | O6 | LIG | 132 | 19.446 | 0.036  | -26.447 | 1.00 | 0.00 |
| ATOM | 2229 | O7 | LIG | 132 | 19.539 | 0.040  | -28.975 | 1.00 | 0.00 |
| ATOM | 2230 | O8 | LIG | 132 | 4.343  | -2.186 | -27.325 | 1.00 | 0.00 |
| ATOM | 2231 | O9 | LIG | 132 | 4.512  | -4.213 | -26.565 | 1.00 | 0.00 |
| ATOM | 2232 | N1 | LIG | 132 | 12.219 | -0.249 | -28.947 | 1.00 | 0.00 |
| ATOM | 2233 | H3 | LIG | 132 | 12.541 | 0.357  | -29.684 | 1.00 | 0.00 |
| ATOM | 2234 | H4 | LIG | 132 | 11.251 | -0.525 | -28.880 | 1.00 | 0.00 |
| ATOM | 2235 | N2 | LIG | 132 | 11.151 | -1.628 | -27.016 | 1.00 | 0.00 |
| ATOM | 2236 | N3 | LIG | 132 | 16.753 | 1.740  | -29.955 | 1.00 | 0.00 |
| ATOM | 2237 | N4 | LIG | 132 | 10.579 | -2.549 | -26.364 | 1.00 | 0.00 |
| ATOM | 2238 | N5 | LIG | 132 | 17.831 | 2.394  | -29.954 | 1.00 | 0.00 |
| ATOM | 2239 | N6 | LIG | 132 | 4.988  | -3.134 | -26.892 | 1.00 | 0.00 |
| ATOM | 2240 | C1 | LIG | 132 | 14.427 | -0.218 | -27.923 | 1.00 | 0.00 |
| ATOM | 2241 | C2 | LIG | 132 | 15.252 | -0.668 | -26.853 | 1.00 | 0.00 |
| ATOM | 2242 | C3 | LIG | 132 | 13.031 | -0.592 | -27.934 | 1.00 | 0.00 |
| ATOM | 2243 | C4 | LIG | 132 | 13.372 | -1.777 | -25.796 | 1.00 | 0.00 |
| ATOM | 2244 | C5 | LIG | 132 | 14.695 | -1.436 | -25.799 | 1.00 | 0.00 |
| ATOM | 2245 | H1 | LIG | 132 | 15.324 | -1.737 | -24.971 | 1.00 | 0.00 |
| ATOM | 2246 | C6 | LIG | 132 | 15.040 | 0.584  | -28.920 | 1.00 | 0.00 |
| ATOM | 2247 | C7 | LIG | 132 | 17.204 | 0.421  | -27.807 | 1.00 | 0.00 |
| ATOM | 2248 | C8 | LIG | 132 | 16.631 | -0.350 | -26.831 | 1.00 | 0.00 |

|      |      |     |     |     |        |        |         |      |      |
|------|------|-----|-----|-----|--------|--------|---------|------|------|
| ATOM | 2249 | H2  | LIG | 132 | 17.250 | -0.733 | -26.030 | 1.00 | 0.00 |
| ATOM | 2250 | C9  | LIG | 132 | 12.499 | -1.384 | -26.862 | 1.00 | 0.00 |
| ATOM | 2251 | C10 | LIG | 132 | 16.411 | 0.935  | -28.877 | 1.00 | 0.00 |
| ATOM | 2252 | C11 | LIG | 132 | 9.183  | -2.637 | -26.526 | 1.00 | 0.00 |
| ATOM | 2253 | C12 | LIG | 132 | 18.125 | 3.137  | -31.114 | 1.00 | 0.00 |
| ATOM | 2254 | C13 | LIG | 132 | 8.390  | -1.580 | -27.006 | 1.00 | 0.00 |
| ATOM | 2255 | H8  | LIG | 132 | 8.855  | -0.635 | -27.253 | 1.00 | 0.00 |
| ATOM | 2256 | C14 | LIG | 132 | 8.583  | -3.843 | -26.138 | 1.00 | 0.00 |
| ATOM | 2257 | H9  | LIG | 132 | 9.198  | -4.643 | -25.745 | 1.00 | 0.00 |
| ATOM | 2258 | C15 | LIG | 132 | 7.020  | -1.743 | -27.127 | 1.00 | 0.00 |
| ATOM | 2259 | H10 | LIG | 132 | 6.386  | -0.945 | -27.485 | 1.00 | 0.00 |
| ATOM | 2260 | C16 | LIG | 132 | 7.212  | -4.014 | -26.263 | 1.00 | 0.00 |
| ATOM | 2261 | H11 | LIG | 132 | 6.729  | -4.939 | -25.980 | 1.00 | 0.00 |
| ATOM | 2262 | C17 | LIG | 132 | 6.450  | -2.962 | -26.762 | 1.00 | 0.00 |
| ATOM | 2263 | C18 | LIG | 132 | 17.482 | 2.953  | -32.349 | 1.00 | 0.00 |
| ATOM | 2264 | H12 | LIG | 132 | 16.730 | 2.182  | -32.454 | 1.00 | 0.00 |
| ATOM | 2265 | C19 | LIG | 132 | 19.148 | 4.089  | -30.990 | 1.00 | 0.00 |
| ATOM | 2266 | H13 | LIG | 132 | 19.655 | 4.204  | -30.040 | 1.00 | 0.00 |
| ATOM | 2267 | C20 | LIG | 132 | 17.845 | 3.738  | -33.432 | 1.00 | 0.00 |
| ATOM | 2268 | H14 | LIG | 132 | 17.358 | 3.592  | -34.390 | 1.00 | 0.00 |
| ATOM | 2269 | C21 | LIG | 132 | 19.497 | 4.878  | -32.079 | 1.00 | 0.00 |
| ATOM | 2270 | H15 | LIG | 132 | 20.281 | 5.618  | -31.978 | 1.00 | 0.00 |

|      |      |     |     |     |        |        |         |      |      |
|------|------|-----|-----|-----|--------|--------|---------|------|------|
| ATOM | 2271 | C22 | LIG | 132 | 18.846 | 4.707  | -33.301 | 1.00 | 0.00 |
| ATOM | 2272 | H16 | LIG | 132 | 19.126 | 5.313  | -34.154 | 1.00 | 0.00 |
| TER  |      |     |     |     |        |        |         |      |      |
| ATOM | 2273 | S1  | LIG | 133 | -6.222 | 14.273 | 18.626  | 1.00 | 0.00 |
| ATOM | 2274 | S2  | LIG | 133 | -2.708 | 20.304 | 22.030  | 1.00 | 0.00 |
| ATOM | 2275 | O1  | LIG | 133 | -3.082 | 15.763 | 24.598  | 1.00 | 0.00 |
| ATOM | 2276 | H5  | LIG | 133 | -2.564 | 16.362 | 25.176  | 1.00 | 0.00 |
| ATOM | 2277 | O2  | LIG | 133 | -7.726 | 13.878 | 19.023  | 1.00 | 0.00 |
| ATOM | 2278 | H6  | LIG | 133 | -7.604 | 13.151 | 19.706  | 1.00 | 0.00 |
| ATOM | 2279 | O3  | LIG | 133 | -1.106 | 20.318 | 22.153  | 1.00 | 0.00 |
| ATOM | 2280 | H7  | LIG | 133 | -0.931 | 19.970 | 23.074  | 1.00 | 0.00 |
| ATOM | 2281 | O4  | LIG | 133 | -6.309 | 15.408 | 17.731  | 1.00 | 0.00 |
| ATOM | 2282 | O5  | LIG | 133 | -5.476 | 13.080 | 18.252  | 1.00 | 0.00 |
| ATOM | 2283 | O6  | LIG | 133 | -3.029 | 20.694 | 20.672  | 1.00 | 0.00 |
| ATOM | 2284 | O7  | LIG | 133 | -3.295 | 20.991 | 23.170  | 1.00 | 0.00 |
| ATOM | 2285 | O8  | LIG | 133 | -7.294 | 6.098  | 22.273  | 1.00 | 0.00 |
| ATOM | 2286 | O9  | LIG | 133 | -9.183 | 6.452  | 21.265  | 1.00 | 0.00 |
| ATOM | 2287 | N1  | LIG | 133 | -4.534 | 13.783 | 23.592  | 1.00 | 0.00 |
| ATOM | 2288 | H3  | LIG | 133 | -3.977 | 14.087 | 24.374  | 1.00 | 0.00 |
| ATOM | 2289 | H4  | LIG | 133 | -4.926 | 12.854 | 23.557  | 1.00 | 0.00 |
| ATOM | 2290 | N2  | LIG | 133 | -5.818 | 12.739 | 21.584  | 1.00 | 0.00 |
| ATOM | 2291 | N3  | LIG | 133 | -2.093 | 18.107 | 24.531  | 1.00 | 0.00 |

|      |      |     |     |     |        |        |        |      |      |
|------|------|-----|-----|-----|--------|--------|--------|------|------|
| ATOM | 2292 | N4  | LIG | 133 | -6.728 | 12.233 | 20.865 | 1.00 | 0.00 |
| ATOM | 2293 | N5  | LIG | 133 | -1.307 | 19.093 | 24.537 | 1.00 | 0.00 |
| ATOM | 2294 | N6  | LIG | 133 | -8.095 | 6.817  | 21.687 | 1.00 | 0.00 |
| ATOM | 2295 | C1  | LIG | 133 | -4.101 | 15.881 | 22.436 | 1.00 | 0.00 |
| ATOM | 2296 | C2  | LIG | 133 | -4.317 | 16.665 | 21.267 | 1.00 | 0.00 |
| ATOM | 2297 | C3  | LIG | 133 | -4.653 | 14.547 | 22.493 | 1.00 | 0.00 |
| ATOM | 2298 | C4  | LIG | 133 | -5.538 | 14.855 | 20.210 | 1.00 | 0.00 |
| ATOM | 2299 | C5  | LIG | 133 | -5.029 | 16.123 | 20.167 | 1.00 | 0.00 |
| ATOM | 2300 | H1  | LIG | 133 | -5.152 | 16.715 | 19.269 | 1.00 | 0.00 |
| ATOM | 2301 | C6  | LIG | 133 | -3.341 | 16.470 | 23.479 | 1.00 | 0.00 |
| ATOM | 2302 | C7  | LIG | 133 | -3.094 | 18.540 | 22.214 | 1.00 | 0.00 |
| ATOM | 2303 | C8  | LIG | 133 | -3.820 | 17.989 | 21.192 | 1.00 | 0.00 |
| ATOM | 2304 | H2  | LIG | 133 | -4.028 | 18.583 | 20.312 | 1.00 | 0.00 |
| ATOM | 2305 | C9  | LIG | 133 | -5.384 | 14.030 | 21.372 | 1.00 | 0.00 |
| ATOM | 2306 | C10 | LIG | 133 | -2.812 | 17.779 | 23.388 | 1.00 | 0.00 |
| ATOM | 2307 | C11 | LIG | 133 | -7.015 | 10.876 | 21.107 | 1.00 | 0.00 |
| ATOM | 2308 | C12 | LIG | 133 | -0.666 | 19.387 | 25.756 | 1.00 | 0.00 |
| ATOM | 2309 | C13 | LIG | 133 | -6.131 | 10.002 | 21.762 | 1.00 | 0.00 |
| ATOM | 2310 | H8  | LIG | 133 | -5.167 | 10.365 | 22.090 | 1.00 | 0.00 |
| ATOM | 2311 | C14 | LIG | 133 | -8.239 | 10.399 | 20.616 | 1.00 | 0.00 |
| ATOM | 2312 | H9  | LIG | 133 | -8.902 | 11.073 | 20.091 | 1.00 | 0.00 |
| ATOM | 2313 | C15 | LIG | 133 | -6.484 | 8.676  | 21.953 | 1.00 | 0.00 |

|      |      |     |     |     |         |        |        |      |      |
|------|------|-----|-----|-----|---------|--------|--------|------|------|
| ATOM | 2314 | H10 | LIG | 133 | -5.821  | 7.980  | 22.445 | 1.00 | 0.00 |
| ATOM | 2315 | C16 | LIG | 133 | -8.601  | 9.073  | 20.811 | 1.00 | 0.00 |
| ATOM | 2316 | H11 | LIG | 133 | -9.543  | 8.686  | 20.451 | 1.00 | 0.00 |
| ATOM | 2317 | C17 | LIG | 133 | -7.719  | 8.232  | 21.482 | 1.00 | 0.00 |
| ATOM | 2318 | C18 | LIG | 133 | -1.069  | 18.873 | 27.000 | 1.00 | 0.00 |
| ATOM | 2319 | H12 | LIG | 133 | -1.938  | 18.232 | 27.060 | 1.00 | 0.00 |
| ATOM | 2320 | C19 | LIG | 133 | 0.419   | 20.272 | 25.681 | 1.00 | 0.00 |
| ATOM | 2321 | H13 | LIG | 133 | 0.704   | 20.682 | 24.719 | 1.00 | 0.00 |
| ATOM | 2322 | C20 | LIG | 133 | -0.369  | 19.224 | 28.143 | 1.00 | 0.00 |
| ATOM | 2323 | H14 | LIG | 133 | -0.683  | 18.838 | 29.106 | 1.00 | 0.00 |
| ATOM | 2324 | C21 | LIG | 133 | 1.121   | 20.609 | 26.832 | 1.00 | 0.00 |
| ATOM | 2325 | H15 | LIG | 133 | 1.964   | 21.285 | 26.769 | 1.00 | 0.00 |
| ATOM | 2326 | C22 | LIG | 133 | 0.731   | 20.085 | 28.064 | 1.00 | 0.00 |
| ATOM | 2327 | H16 | LIG | 133 | 1.270   | 20.357 | 28.964 | 1.00 | 0.00 |
| TER  |      |     |     |     |         |        |        |      |      |
| ATOM | 2328 | S1  | LIG | 134 | -25.482 | -4.867 | 14.844 | 1.00 | 0.00 |
| ATOM | 2329 | S2  | LIG | 134 | -24.587 | -9.072 | 21.311 | 1.00 | 0.00 |
| ATOM | 2330 | O1  | LIG | 134 | -26.301 | -4.143 | 21.666 | 1.00 | 0.00 |
| ATOM | 2331 | H5  | LIG | 134 | -26.314 | -4.503 | 22.579 | 1.00 | 0.00 |
| ATOM | 2332 | O2  | LIG | 134 | -24.386 | -3.771 | 14.428 | 1.00 | 0.00 |
| ATOM | 2333 | H6  | LIG | 134 | -24.766 | -2.913 | 14.787 | 1.00 | 0.00 |
| ATOM | 2334 | O3  | LIG | 134 | -25.885 | -9.648 | 22.065 | 1.00 | 0.00 |



|      |      |    |     |     |         |        |        |      |      |
|------|------|----|-----|-----|---------|--------|--------|------|------|
| ATOM | 2335 | H7 | LIG | 134 | -26.066 | -8.975 | 22.782 | 1.00 | 0.00 |
| ATOM | 2336 | O4 | LIG | 134 | -24.945 | -6.159 | 14.470 | 1.00 | 0.00 |
| ATOM | 2337 | O5 | LIG | 134 | -26.802 | -4.446 | 14.396 | 1.00 | 0.00 |
| ATOM | 2338 | O6 | LIG | 134 | -24.334 | -9.945 | 20.184 | 1.00 | 0.00 |
| ATOM | 2339 | O7 | LIG | 134 | -23.547 | -8.774 | 22.283 | 1.00 | 0.00 |
| ATOM | 2340 | O8 | LIG | 134 | -28.397 | 3.657  | 14.502 | 1.00 | 0.00 |
| ATOM | 2341 | O9 | LIG | 134 | -26.809 | 3.608  | 13.024 | 1.00 | 0.00 |
| ATOM | 2342 | N1 | LIG | 134 | -26.330 | -2.588 | 19.517 | 1.00 | 0.00 |
| ATOM | 2343 | H3 | LIG | 134 | -26.500 | -2.634 | 20.509 | 1.00 | 0.00 |
| ATOM | 2344 | H4 | LIG | 134 | -26.512 | -1.746 | 18.991 | 1.00 | 0.00 |
| ATOM | 2345 | N2 | LIG | 134 | -26.158 | -2.330 | 16.933 | 1.00 | 0.00 |
| ATOM | 2346 | N3 | LIG | 134 | -25.869 | -6.349 | 22.860 | 1.00 | 0.00 |
| ATOM | 2347 | N4 | LIG | 134 | -25.795 | -1.959 | 15.779 | 1.00 | 0.00 |
| ATOM | 2348 | N5 | LIG | 134 | -25.988 | -7.404 | 23.541 | 1.00 | 0.00 |
| ATOM | 2349 | N6 | LIG | 134 | -27.444 | 3.121  | 13.949 | 1.00 | 0.00 |
| ATOM | 2350 | C1 | LIG | 134 | -25.749 | -4.952 | 19.483 | 1.00 | 0.00 |
| ATOM | 2351 | C2 | LIG | 134 | -25.339 | -6.068 | 18.699 | 1.00 | 0.00 |
| ATOM | 2352 | C3 | LIG | 134 | -26.000 | -3.691 | 18.823 | 1.00 | 0.00 |
| ATOM | 2353 | C4 | LIG | 134 | -25.475 | -4.759 | 16.662 | 1.00 | 0.00 |
| ATOM | 2354 | C5 | LIG | 134 | -25.221 | -5.945 | 17.292 | 1.00 | 0.00 |
| ATOM | 2355 | H1 | LIG | 134 | -24.948 | -6.812 | 16.703 | 1.00 | 0.00 |
| ATOM | 2356 | C6 | LIG | 134 | -25.890 | -5.158 | 20.879 | 1.00 | 0.00 |

|      |      |     |     |     |         |        |        |      |      |
|------|------|-----|-----|-----|---------|--------|--------|------|------|
| ATOM | 2357 | C7  | LIG | 134 | -25.187 | -7.484 | 20.669 | 1.00 | 0.00 |
| ATOM | 2358 | C8  | LIG | 134 | -25.050 | -7.308 | 19.318 | 1.00 | 0.00 |
| ATOM | 2359 | H2  | LIG | 134 | -24.702 | -8.134 | 18.711 | 1.00 | 0.00 |
| ATOM | 2360 | C9  | LIG | 134 | -25.857 | -3.591 | 17.399 | 1.00 | 0.00 |
| ATOM | 2361 | C10 | LIG | 134 | -25.638 | -6.408 | 21.492 | 1.00 | 0.00 |
| ATOM | 2362 | C11 | LIG | 134 | -26.248 | -0.689 | 15.373 | 1.00 | 0.00 |
| ATOM | 2363 | C12 | LIG | 134 | -26.161 | -7.248 | 24.929 | 1.00 | 0.00 |
| ATOM | 2364 | C13 | LIG | 134 | -27.342 | -0.032 | 15.961 | 1.00 | 0.00 |
| ATOM | 2365 | H8  | LIG | 134 | -27.891 | -0.518 | 16.757 | 1.00 | 0.00 |
| ATOM | 2366 | C14 | LIG | 134 | -25.573 | -0.100 | 14.295 | 1.00 | 0.00 |
| ATOM | 2367 | H9  | LIG | 134 | -24.747 | -0.625 | 13.832 | 1.00 | 0.00 |
| ATOM | 2368 | C15 | LIG | 134 | -27.732 | 1.213  | 15.497 | 1.00 | 0.00 |
| ATOM | 2369 | H10 | LIG | 134 | -28.575 | 1.737  | 15.925 | 1.00 | 0.00 |
| ATOM | 2370 | C16 | LIG | 134 | -25.955 | 1.151  | 13.830 | 1.00 | 0.00 |
| ATOM | 2371 | H11 | LIG | 134 | -25.442 | 1.629  | 13.008 | 1.00 | 0.00 |
| ATOM | 2372 | C17 | LIG | 134 | -27.027 | 1.792  | 14.443 | 1.00 | 0.00 |
| ATOM | 2373 | C18 | LIG | 134 | -25.901 | -6.056 | 25.626 | 1.00 | 0.00 |
| ATOM | 2374 | H12 | LIG | 134 | -25.517 | -5.196 | 25.093 | 1.00 | 0.00 |
| ATOM | 2375 | C19 | LIG | 134 | -26.595 | -8.386 | 25.625 | 1.00 | 0.00 |
| ATOM | 2376 | H13 | LIG | 134 | -26.767 | -9.307 | 25.082 | 1.00 | 0.00 |
| ATOM | 2377 | C20 | LIG | 134 | -26.105 | -6.006 | 26.996 | 1.00 | 0.00 |
| ATOM | 2378 | H14 | LIG | 134 | -25.896 | -5.091 | 27.538 | 1.00 | 0.00 |

|      |      |     |     |     |         |        |        |      |      |
|------|------|-----|-----|-----|---------|--------|--------|------|------|
| ATOM | 2379 | C21 | LIG | 134 | -26.806 | -8.322 | 26.997 | 1.00 | 0.00 |
| ATOM | 2380 | H15 | LIG | 134 | -27.150 | -9.200 | 27.530 | 1.00 | 0.00 |
| ATOM | 2381 | C22 | LIG | 134 | -26.565 | -7.133 | 27.685 | 1.00 | 0.00 |
| ATOM | 2382 | H16 | LIG | 134 | -26.717 | -7.086 | 28.757 | 1.00 | 0.00 |
| TER  |      |     |     |     |         |        |        |      |      |
| ATOM | 2383 | S1  | LIG | 135 | 12.440  | 23.355 | -0.749 | 1.00 | 0.00 |
| ATOM | 2384 | S2  | LIG | 135 | 11.549  | 22.675 | -8.434 | 1.00 | 0.00 |
| ATOM | 2385 | O1  | LIG | 135 | 15.472  | 20.151 | -6.067 | 1.00 | 0.00 |
| ATOM | 2386 | H5  | LIG | 135 | 15.508  | 19.888 | -7.012 | 1.00 | 0.00 |
| ATOM | 2387 | O2  | LIG | 135 | 13.562  | 24.329 | -0.144 | 1.00 | 0.00 |
| ATOM | 2388 | H6  | LIG | 135 | 14.336  | 23.713 | 0.033  | 1.00 | 0.00 |
| ATOM | 2389 | O3  | LIG | 135 | 10.951  | 21.313 | -9.042 | 1.00 | 0.00 |
| ATOM | 2390 | H7  | LIG | 135 | 11.762  | 20.789 | -9.304 | 1.00 | 0.00 |
| ATOM | 2391 | O4  | LIG | 135 | 11.329  | 24.194 | -1.150 | 1.00 | 0.00 |
| ATOM | 2392 | O5  | LIG | 135 | 12.239  | 22.217 | 0.136  | 1.00 | 0.00 |
| ATOM | 2393 | O6  | LIG | 135 | 10.427  | 23.439 | -7.930 | 1.00 | 0.00 |
| ATOM | 2394 | O7  | LIG | 135 | 12.497  | 23.257 | -9.371 | 1.00 | 0.00 |
| ATOM | 2395 | O8  | LIG | 135 | 18.867  | 19.361 | 4.151  | 1.00 | 0.00 |
| ATOM | 2396 | O9  | LIG | 135 | 18.726  | 21.343 | 5.024  | 1.00 | 0.00 |
| ATOM | 2397 | N1  | LIG | 135 | 15.986  | 20.599 | -3.503 | 1.00 | 0.00 |
| ATOM | 2398 | H3  | LIG | 135 | 16.280  | 20.112 | -4.334 | 1.00 | 0.00 |
| ATOM | 2399 | H4  | LIG | 135 | 16.461  | 20.471 | -2.623 | 1.00 | 0.00 |

|      |      |     |     |     |        |        |         |      |      |
|------|------|-----|-----|-----|--------|--------|---------|------|------|
| ATOM | 2400 | N2  | LIG | 135 | 15.260 | 21.597 | -1.212  | 1.00 | 0.00 |
| ATOM | 2401 | N3  | LIG | 135 | 14.141 | 20.509 | -8.207  | 1.00 | 0.00 |
| ATOM | 2402 | N4  | LIG | 135 | 15.244 | 22.265 | -0.137  | 1.00 | 0.00 |
| ATOM | 2403 | N5  | LIG | 135 | 13.450 | 20.342 | -9.248  | 1.00 | 0.00 |
| ATOM | 2404 | N6  | LIG | 135 | 18.471 | 20.521 | 4.155   | 1.00 | 0.00 |
| ATOM | 2405 | C1  | LIG | 135 | 14.085 | 21.541 | -4.699  | 1.00 | 0.00 |
| ATOM | 2406 | C2  | LIG | 135 | 12.931 | 22.372 | -4.637  | 1.00 | 0.00 |
| ATOM | 2407 | C3  | LIG | 135 | 14.854 | 21.324 | -3.494  | 1.00 | 0.00 |
| ATOM | 2408 | C4  | LIG | 135 | 13.241 | 22.724 | -2.258  | 1.00 | 0.00 |
| ATOM | 2409 | C5  | LIG | 135 | 12.527 | 22.941 | -3.403  | 1.00 | 0.00 |
| ATOM | 2410 | H1  | LIG | 135 | 11.625 | 23.537 | -3.362  | 1.00 | 0.00 |
| ATOM | 2411 | C6  | LIG | 135 | 14.404 | 20.968 | -5.957  | 1.00 | 0.00 |
| ATOM | 2412 | C7  | LIG | 135 | 12.505 | 22.076 | -7.012  | 1.00 | 0.00 |
| ATOM | 2413 | C8  | LIG | 135 | 12.176 | 22.634 | -5.806  | 1.00 | 0.00 |
| ATOM | 2414 | H2  | LIG | 135 | 11.325 | 23.300 | -5.748  | 1.00 | 0.00 |
| ATOM | 2415 | C9  | LIG | 135 | 14.431 | 21.925 | -2.262  | 1.00 | 0.00 |
| ATOM | 2416 | C10 | LIG | 135 | 13.627 | 21.199 | -7.116  | 1.00 | 0.00 |
| ATOM | 2417 | C11 | LIG | 135 | 16.059 | 21.773 | 0.901   | 1.00 | 0.00 |
| ATOM | 2418 | C12 | LIG | 135 | 14.072 | 19.683 | -10.325 | 1.00 | 0.00 |
| ATOM | 2419 | C13 | LIG | 135 | 16.532 | 20.451 | 0.955   | 1.00 | 0.00 |
| ATOM | 2420 | H8  | LIG | 135 | 16.254 | 19.753 | 0.178   | 1.00 | 0.00 |
| ATOM | 2421 | C14 | LIG | 135 | 16.356 | 22.668 | 1.939   | 1.00 | 0.00 |

|      |      |     |     |     |        |         |         |      |      |
|------|------|-----|-----|-----|--------|---------|---------|------|------|
| ATOM | 2422 | H9  | LIG | 135 | 15.966 | 23.677  | 1.902   | 1.00 | 0.00 |
| ATOM | 2423 | C15 | LIG | 135 | 17.321 | 20.043  | 2.017   | 1.00 | 0.00 |
| ATOM | 2424 | H10 | LIG | 135 | 17.692 | 19.030  | 2.089   | 1.00 | 0.00 |
| ATOM | 2425 | C16 | LIG | 135 | 17.152 | 22.266  | 3.002   | 1.00 | 0.00 |
| ATOM | 2426 | H11 | LIG | 135 | 17.403 | 22.942  | 3.807   | 1.00 | 0.00 |
| ATOM | 2427 | C17 | LIG | 135 | 17.628 | 20.958  | 3.023   | 1.00 | 0.00 |
| ATOM | 2428 | C18 | LIG | 135 | 15.459 | 19.488  | -10.432 | 1.00 | 0.00 |
| ATOM | 2429 | H12 | LIG | 135 | 16.117 | 19.883  | -9.670  | 1.00 | 0.00 |
| ATOM | 2430 | C19 | LIG | 135 | 13.220 | 19.233  | -11.344 | 1.00 | 0.00 |
| ATOM | 2431 | H13 | LIG | 135 | 12.154 | 19.412  | -11.263 | 1.00 | 0.00 |
| ATOM | 2432 | C20 | LIG | 135 | 15.973 | 18.824  | -11.535 | 1.00 | 0.00 |
| ATOM | 2433 | H14 | LIG | 135 | 17.044 | 18.681  | -11.627 | 1.00 | 0.00 |
| ATOM | 2434 | C21 | LIG | 135 | 13.744 | 18.559  | -12.441 | 1.00 | 0.00 |
| ATOM | 2435 | H15 | LIG | 135 | 13.083 | 18.205  | -13.221 | 1.00 | 0.00 |
| ATOM | 2436 | C22 | LIG | 135 | 15.120 | 18.351  | -12.538 | 1.00 | 0.00 |
| ATOM | 2437 | H16 | LIG | 135 | 15.531 | 17.836  | -13.398 | 1.00 | 0.00 |
| TER  |      |     |     |     |        |         |         |      |      |
| ATOM | 2438 | S1  | LIG | 136 | -4.733 | -16.007 | 22.630  | 1.00 | 0.00 |
| ATOM | 2439 | S2  | LIG | 136 | -7.005 | -15.755 | 30.051  | 1.00 | 0.00 |
| ATOM | 2440 | O1  | LIG | 136 | -4.961 | -11.477 | 27.843  | 1.00 | 0.00 |
| ATOM | 2441 | H5  | LIG | 136 | -5.226 | -11.216 | 28.750  | 1.00 | 0.00 |
| ATOM | 2442 | O2  | LIG | 136 | -3.178 | -16.152 | 22.259  | 1.00 | 0.00 |

|      |      |    |     |     |        |         |        |      |      |
|------|------|----|-----|-----|--------|---------|--------|------|------|
| ATOM | 2443 | H6 | LIG | 136 | -2.887 | -15.204 | 22.097 | 1.00 | 0.00 |
| ATOM | 2444 | O3 | LIG | 136 | -8.364 | -14.989 | 30.436 | 1.00 | 0.00 |
| ATOM | 2445 | H7 | LIG | 136 | -8.056 | -14.080 | 30.721 | 1.00 | 0.00 |
| ATOM | 2446 | O4 | LIG | 136 | -5.199 | -17.326 | 23.003 | 1.00 | 0.00 |
| ATOM | 2447 | O5 | LIG | 136 | -5.418 | -15.231 | 21.606 | 1.00 | 0.00 |
| ATOM | 2448 | O6 | LIG | 136 | -7.387 | -17.048 | 29.521 | 1.00 | 0.00 |
| ATOM | 2449 | O7 | LIG | 136 | -6.050 | -15.641 | 31.143 | 1.00 | 0.00 |
| ATOM | 2450 | O8 | LIG | 136 | -1.147 | -9.142  | 18.016 | 1.00 | 0.00 |
| ATOM | 2451 | O9 | LIG | 136 | 0.019  | -10.852 | 17.362 | 1.00 | 0.00 |
| ATOM | 2452 | N1 | LIG | 136 | -3.900 | -11.613 | 25.414 | 1.00 | 0.00 |
| ATOM | 2453 | H3 | LIG | 136 | -4.073 | -11.021 | 26.211 | 1.00 | 0.00 |
| ATOM | 2454 | H4 | LIG | 136 | -3.460 | -11.255 | 24.580 | 1.00 | 0.00 |
| ATOM | 2455 | N2 | LIG | 136 | -3.558 | -12.913 | 23.186 | 1.00 | 0.00 |
| ATOM | 2456 | N3 | LIG | 136 | -6.144 | -12.487 | 29.856 | 1.00 | 0.00 |
| ATOM | 2457 | N4 | LIG | 136 | -3.022 | -13.494 | 22.198 | 1.00 | 0.00 |
| ATOM | 2458 | N5 | LIG | 136 | -6.953 | -12.728 | 30.794 | 1.00 | 0.00 |
| ATOM | 2459 | N6 | LIG | 136 | -0.793 | -10.312 | 18.101 | 1.00 | 0.00 |
| ATOM | 2460 | C1 | LIG | 136 | -5.061 | -13.457 | 26.501 | 1.00 | 0.00 |
| ATOM | 2461 | C2 | LIG | 136 | -5.497 | -14.809 | 26.412 | 1.00 | 0.00 |
| ATOM | 2462 | C3 | LIG | 136 | -4.388 | -12.864 | 25.367 | 1.00 | 0.00 |
| ATOM | 2463 | C4 | LIG | 136 | -4.684 | -14.981 | 24.133 | 1.00 | 0.00 |
| ATOM | 2464 | C5 | LIG | 136 | -5.304 | -15.542 | 25.214 | 1.00 | 0.00 |

|      |      |     |     |     |        |         |        |      |      |
|------|------|-----|-----|-----|--------|---------|--------|------|------|
| ATOM | 2465 | H1  | LIG | 136 | -5.677 | -16.557 | 25.146 | 1.00 | 0.00 |
| ATOM | 2466 | C6  | LIG | 136 | -5.327 | -12.769 | 27.713 | 1.00 | 0.00 |
| ATOM | 2467 | C7  | LIG | 136 | -6.369 | -14.751 | 28.680 | 1.00 | 0.00 |
| ATOM | 2468 | C8  | LIG | 136 | -6.128 | -15.431 | 27.517 | 1.00 | 0.00 |
| ATOM | 2469 | H2  | LIG | 136 | -6.416 | -16.472 | 27.445 | 1.00 | 0.00 |
| ATOM | 2470 | C9  | LIG | 136 | -4.192 | -13.635 | 24.173 | 1.00 | 0.00 |
| ATOM | 2471 | C10 | LIG | 136 | -5.992 | -13.379 | 28.803 | 1.00 | 0.00 |
| ATOM | 2472 | C11 | LIG | 136 | -2.496 | -12.648 | 21.202 | 1.00 | 0.00 |
| ATOM | 2473 | C12 | LIG | 136 | -6.999 | -11.798 | 31.849 | 1.00 | 0.00 |
| ATOM | 2474 | C13 | LIG | 136 | -2.872 | -11.302 | 21.050 | 1.00 | 0.00 |
| ATOM | 2475 | H8  | LIG | 136 | -3.617 | -10.879 | 21.710 | 1.00 | 0.00 |
| ATOM | 2476 | C14 | LIG | 136 | -1.583 | -13.226 | 20.309 | 1.00 | 0.00 |
| ATOM | 2477 | H9  | LIG | 136 | -1.318 | -14.270 | 20.419 | 1.00 | 0.00 |
| ATOM | 2478 | C15 | LIG | 136 | -2.315 | -10.539 | 20.038 | 1.00 | 0.00 |
| ATOM | 2479 | H10 | LIG | 136 | -2.593 | -9.505  | 19.892 | 1.00 | 0.00 |
| ATOM | 2480 | C16 | LIG | 136 | -1.016 | -12.464 | 19.298 | 1.00 | 0.00 |
| ATOM | 2481 | H11 | LIG | 136 | -0.302 | -12.886 | 18.605 | 1.00 | 0.00 |
| ATOM | 2482 | C17 | LIG | 136 | -1.387 | -11.128 | 19.180 | 1.00 | 0.00 |
| ATOM | 2483 | C18 | LIG | 136 | -6.015 | -10.821 | 32.080 | 1.00 | 0.00 |
| ATOM | 2484 | H12 | LIG | 136 | -5.144 | -10.775 | 31.440 | 1.00 | 0.00 |
| ATOM | 2485 | C19 | LIG | 136 | -8.096 | -11.906 | 32.715 | 1.00 | 0.00 |
| ATOM | 2486 | H13 | LIG | 136 | -8.835 | -12.679 | 32.543 | 1.00 | 0.00 |

|      |      |     |     |     |        |         |         |      |      |
|------|------|-----|-----|-----|--------|---------|---------|------|------|
| ATOM | 2487 | C20 | LIG | 136 | -6.154 | -9.950  | 33.149  | 1.00 | 0.00 |
| ATOM | 2488 | H14 | LIG | 136 | -5.392 | -9.202  | 33.336  | 1.00 | 0.00 |
| ATOM | 2489 | C21 | LIG | 136 | -8.232 | -11.020 | 33.778  | 1.00 | 0.00 |
| ATOM | 2490 | H15 | LIG | 136 | -9.085 | -11.100 | 34.440  | 1.00 | 0.00 |
| ATOM | 2491 | C22 | LIG | 136 | -7.264 | -10.040 | 33.996  | 1.00 | 0.00 |
| ATOM | 2492 | H16 | LIG | 136 | -7.362 | -9.357  | 34.831  | 1.00 | 0.00 |
| TER  |      |     |     |     |        |         |         |      |      |
| ATOM | 2493 | S1  | LIG | 137 | 30.663 | -5.395  | -12.685 | 1.00 | 0.00 |
| ATOM | 2494 | S2  | LIG | 137 | 32.034 | -0.452  | -18.515 | 1.00 | 0.00 |
| ATOM | 2495 | O1  | LIG | 137 | 31.636 | 1.380   | -13.632 | 1.00 | 0.00 |
| ATOM | 2496 | H5  | LIG | 137 | 31.862 | 2.150   | -14.196 | 1.00 | 0.00 |
| ATOM | 2497 | O2  | LIG | 137 | 29.190 | -5.531  | -12.063 | 1.00 | 0.00 |
| ATOM | 2498 | H6  | LIG | 137 | 29.218 | -4.924  | -11.263 | 1.00 | 0.00 |
| ATOM | 2499 | O3  | LIG | 137 | 33.507 | 0.165   | -18.698 | 1.00 | 0.00 |
| ATOM | 2500 | H7  | LIG | 137 | 33.455 | 1.053   | -18.240 | 1.00 | 0.00 |
| ATOM | 2501 | O4  | LIG | 137 | 30.667 | -6.148  | -13.923 | 1.00 | 0.00 |
| ATOM | 2502 | O5  | LIG | 137 | 31.663 | -5.641  | -11.656 | 1.00 | 0.00 |
| ATOM | 2503 | O6  | LIG | 137 | 32.070 | -1.793  | -19.062 | 1.00 | 0.00 |
| ATOM | 2504 | O7  | LIG | 137 | 31.039 | 0.515   | -18.953 | 1.00 | 0.00 |
| ATOM | 2505 | O8  | LIG | 137 | 29.857 | -3.145  | -3.993  | 1.00 | 0.00 |
| ATOM | 2506 | O9  | LIG | 137 | 28.317 | -4.649  | -4.269  | 1.00 | 0.00 |
| ATOM | 2507 | N1  | LIG | 137 | 30.872 | -0.231  | -11.667 | 1.00 | 0.00 |



|      |      |     |     |     |        |        |         |      |      |
|------|------|-----|-----|-----|--------|--------|---------|------|------|
| ATOM | 2508 | H3  | LIG | 137 | 31.120 | 0.713  | -11.915 | 1.00 | 0.00 |
| ATOM | 2509 | H4  | LIG | 137 | 30.658 | -0.484 | -10.714 | 1.00 | 0.00 |
| ATOM | 2510 | N2  | LIG | 137 | 30.415 | -2.638 | -10.790 | 1.00 | 0.00 |
| ATOM | 2511 | N3  | LIG | 137 | 32.222 | 1.870  | -16.060 | 1.00 | 0.00 |
| ATOM | 2512 | N4  | LIG | 137 | 29.846 | -3.653 | -10.292 | 1.00 | 0.00 |
| ATOM | 2513 | N5  | LIG | 137 | 32.808 | 2.225  | -17.119 | 1.00 | 0.00 |
| ATOM | 2514 | N6  | LIG | 137 | 29.162 | -3.872 | -4.692  | 1.00 | 0.00 |
| ATOM | 2515 | C1  | LIG | 137 | 31.292 | -0.968 | -13.949 | 1.00 | 0.00 |
| ATOM | 2516 | C2  | LIG | 137 | 31.310 | -2.057 | -14.866 | 1.00 | 0.00 |
| ATOM | 2517 | C3  | LIG | 137 | 30.963 | -1.226 | -12.566 | 1.00 | 0.00 |
| ATOM | 2518 | C4  | LIG | 137 | 30.751 | -3.625 | -13.103 | 1.00 | 0.00 |
| ATOM | 2519 | C5  | LIG | 137 | 31.046 | -3.374 | -14.414 | 1.00 | 0.00 |
| ATOM | 2520 | H1  | LIG | 137 | 31.102 | -4.197 | -15.114 | 1.00 | 0.00 |
| ATOM | 2521 | C6  | LIG | 137 | 31.611 | 0.316  | -14.462 | 1.00 | 0.00 |
| ATOM | 2522 | C7  | LIG | 137 | 31.892 | -0.584 | -16.711 | 1.00 | 0.00 |
| ATOM | 2523 | C8  | LIG | 137 | 31.593 | -1.833 | -16.235 | 1.00 | 0.00 |
| ATOM | 2524 | H2  | LIG | 137 | 31.563 | -2.666 | -16.926 | 1.00 | 0.00 |
| ATOM | 2525 | C9  | LIG | 137 | 30.684 | -2.567 | -12.139 | 1.00 | 0.00 |
| ATOM | 2526 | C10 | LIG | 137 | 31.932 | 0.533  | -15.823 | 1.00 | 0.00 |
| ATOM | 2527 | C11 | LIG | 137 | 29.716 | -3.657 | -8.890  | 1.00 | 0.00 |
| ATOM | 2528 | C12 | LIG | 137 | 33.008 | 3.607  | -17.302 | 1.00 | 0.00 |
| ATOM | 2529 | C13 | LIG | 137 | 30.494 | -2.854 | -8.038  | 1.00 | 0.00 |

|      |      |     |     |     |        |        |         |      |      |
|------|------|-----|-----|-----|--------|--------|---------|------|------|
| ATOM | 2530 | H8  | LIG | 137 | 31.250 | -2.206 | -8.459  | 1.00 | 0.00 |
| ATOM | 2531 | C14 | LIG | 137 | 28.782 | -4.552 | -8.351  | 1.00 | 0.00 |
| ATOM | 2532 | H9  | LIG | 137 | 28.205 | -5.184 | -9.014  | 1.00 | 0.00 |
| ATOM | 2533 | C15 | LIG | 137 | 30.312 | -2.924 | -6.667  | 1.00 | 0.00 |
| ATOM | 2534 | H10 | LIG | 137 | 30.902 | -2.325 | -5.987  | 1.00 | 0.00 |
| ATOM | 2535 | C16 | LIG | 137 | 28.590 | -4.621 | -6.979  | 1.00 | 0.00 |
| ATOM | 2536 | H11 | LIG | 137 | 27.867 | -5.295 | -6.542  | 1.00 | 0.00 |
| ATOM | 2537 | C17 | LIG | 137 | 29.356 | -3.800 | -6.156  | 1.00 | 0.00 |
| ATOM | 2538 | C18 | LIG | 137 | 32.343 | 4.602  | -16.566 | 1.00 | 0.00 |
| ATOM | 2539 | H12 | LIG | 137 | 31.605 | 4.321  | -15.826 | 1.00 | 0.00 |
| ATOM | 2540 | C19 | LIG | 137 | 33.915 | 3.967  | -18.309 | 1.00 | 0.00 |
| ATOM | 2541 | H13 | LIG | 137 | 34.403 | 3.192  | -18.887 | 1.00 | 0.00 |
| ATOM | 2542 | C20 | LIG | 137 | 32.613 | 5.937  | -16.823 | 1.00 | 0.00 |
| ATOM | 2543 | H14 | LIG | 137 | 32.094 | 6.708  | -16.265 | 1.00 | 0.00 |
| ATOM | 2544 | C21 | LIG | 137 | 34.187 | 5.308  | -18.551 | 1.00 | 0.00 |
| ATOM | 2545 | H15 | LIG | 137 | 34.894 | 5.583  | -19.323 | 1.00 | 0.00 |
| ATOM | 2546 | C22 | LIG | 137 | 33.539 | 6.295  | -17.809 | 1.00 | 0.00 |
| ATOM | 2547 | H16 | LIG | 137 | 33.740 | 7.342  | -18.006 | 1.00 | 0.00 |
| TER  |      |     |     |     |        |        |         |      |      |
| END  |      |     |     |     |        |        |         |      |      |

**Table C:** The number of atoms present in the system of AH-SIs

|      |    |     |     |   |        |         |        |      |      |
|------|----|-----|-----|---|--------|---------|--------|------|------|
| ATOM | 1  | N   | GLY | 1 | 23.437 | -11.685 | -2.766 | 1.00 | 0.00 |
| ATOM | 2  | H1  | GLY | 1 | 22.736 | -10.970 | -2.890 | 1.00 | 0.00 |
| ATOM | 3  | H2  | GLY | 1 | 23.052 | -12.572 | -3.058 | 1.00 | 0.00 |
| ATOM | 4  | H3  | GLY | 1 | 24.308 | -11.359 | -3.161 | 1.00 | 0.00 |
| ATOM | 5  | CA  | GLY | 1 | 23.697 | -11.830 | -1.306 | 1.00 | 0.00 |
| ATOM | 6  | HA2 | GLY | 1 | 23.465 | -12.846 | -0.985 | 1.00 | 0.00 |
| ATOM | 7  | HA3 | GLY | 1 | 24.743 | -11.612 | -1.090 | 1.00 | 0.00 |
| ATOM | 8  | C   | GLY | 1 | 22.813 | -10.849 | -0.532 | 1.00 | 0.00 |
| ATOM | 9  | O   | GLY | 1 | 23.284 | -9.860  | -0.005 | 1.00 | 0.00 |
| ATOM | 10 | N   | PRO | 2 | 21.506 | -11.134 | -0.466 | 1.00 | 0.00 |
| ATOM | 11 | CD  | PRO | 2 | 20.863 | -12.310 | -1.078 | 1.00 | 0.00 |
| ATOM | 12 | HD2 | PRO | 2 | 21.424 | -13.208 | -0.817 | 1.00 | 0.00 |
| ATOM | 13 | HD3 | PRO | 2 | 20.849 | -12.194 | -2.162 | 1.00 | 0.00 |
| ATOM | 14 | CG  | PRO | 2 | 19.484 | -12.297 | -0.483 | 1.00 | 0.00 |
| ATOM | 15 | HG2 | PRO | 2 | 19.468 | -12.931 | 0.404  | 1.00 | 0.00 |
| ATOM | 16 | HG3 | PRO | 2 | 18.772 | -12.679 | -1.214 | 1.00 | 0.00 |
| ATOM | 17 | CB  | PRO | 2 | 19.188 | -10.876 | -0.143 | 1.00 | 0.00 |
| ATOM | 18 | HB2 | PRO | 2 | 18.519 | -10.862 | 0.717  | 1.00 | 0.00 |
| ATOM | 19 | HB3 | PRO | 2 | 18.747 | -10.299 | -0.956 | 1.00 | 0.00 |
| ATOM | 20 | CA  | PRO | 2 | 20.542 | -10.282 | 0.243  | 1.00 | 0.00 |
| ATOM | 21 | HA  | PRO | 2 | 20.681 | -9.255  | -0.093 | 1.00 | 0.00 |
| ATOM | 22 | C   | PRO | 2 | 20.731 | -10.352 | 1.761  | 1.00 | 0.00 |

|      |    |     |     |   |        |         |       |      |      |
|------|----|-----|-----|---|--------|---------|-------|------|------|
| ATOM | 23 | O   | PRO | 2 | 20.286 | -9.489  | 2.492 | 1.00 | 0.00 |
| ATOM | 24 | N   | MET | 3 | 21.387 | -11.373 | 2.240 | 1.00 | 0.00 |
| ATOM | 25 | H   | MET | 3 | 21.760 | -12.095 | 1.639 | 1.00 | 0.00 |
| ATOM | 26 | CA  | MET | 3 | 21.602 | -11.496 | 3.710 | 1.00 | 0.00 |
| ATOM | 27 | HA  | MET | 3 | 20.646 | -11.584 | 4.226 | 1.00 | 0.00 |
| ATOM | 28 | CB  | MET | 3 | 22.431 | -12.749 | 4.000 | 1.00 | 0.00 |
| ATOM | 29 | HB2 | MET | 3 | 23.364 | -12.707 | 3.437 | 1.00 | 0.00 |
| ATOM | 30 | HB3 | MET | 3 | 22.653 | -12.801 | 5.066 | 1.00 | 0.00 |
| ATOM | 31 | CG  | MET | 3 | 21.640 | -13.991 | 3.583 | 1.00 | 0.00 |
| ATOM | 32 | HG2 | MET | 3 | 21.453 | -13.966 | 2.509 | 1.00 | 0.00 |
| ATOM | 33 | HG3 | MET | 3 | 22.206 | -14.889 | 3.832 | 1.00 | 0.00 |
| ATOM | 34 | SD  | MET | 3 | 20.058 | -14.022 | 4.462 | 1.00 | 0.00 |
| ATOM | 35 | CE  | MET | 3 | 20.732 | -14.100 | 6.140 | 1.00 | 0.00 |
| ATOM | 36 | HE1 | MET | 3 | 21.349 | -13.221 | 6.326 | 1.00 | 0.00 |
| ATOM | 37 | HE2 | MET | 3 | 19.914 | -14.128 | 6.860 | 1.00 | 0.00 |
| ATOM | 38 | HE3 | MET | 3 | 21.340 | -14.999 | 6.247 | 1.00 | 0.00 |
| ATOM | 39 | C   | MET | 3 | 22.346 | -10.261 | 4.221 | 1.00 | 0.00 |
| ATOM | 40 | O   | MET | 3 | 22.100 | -9.783  | 5.311 | 1.00 | 0.00 |
| ATOM | 41 | N   | ARG | 4 | 23.256 | -9.740  | 3.443 | 1.00 | 0.00 |
| ATOM | 42 | H   | ARG | 4 | 23.468 | -10.133 | 2.537 | 1.00 | 0.00 |
| ATOM | 43 | CA  | ARG | 4 | 24.013 | -8.536  | 3.885 | 1.00 | 0.00 |
| ATOM | 44 | HA  | ARG | 4 | 24.597 | -8.764  | 4.777 | 1.00 | 0.00 |

|      |    |      |     |   |        |         |        |      |      |
|------|----|------|-----|---|--------|---------|--------|------|------|
| ATOM | 45 | CB   | ARG | 4 | 24.968 | -8.096  | 2.774  | 1.00 | 0.00 |
| ATOM | 46 | HB2  | ARG | 4 | 24.405 | -7.929  | 1.856  | 1.00 | 0.00 |
| ATOM | 47 | HB3  | ARG | 4 | 25.466 | -7.172  | 3.068  | 1.00 | 0.00 |
| ATOM | 48 | CG   | ARG | 4 | 26.015 | -9.186  | 2.538  | 1.00 | 0.00 |
| ATOM | 49 | HG2  | ARG | 4 | 26.520 | -9.415  | 3.476  | 1.00 | 0.00 |
| ATOM | 50 | HG3  | ARG | 4 | 25.527 | -10.085 | 2.161  | 1.00 | 0.00 |
| ATOM | 51 | CD   | ARG | 4 | 27.040 | -8.695  | 1.514  | 1.00 | 0.00 |
| ATOM | 52 | HD2  | ARG | 4 | 27.562 | -7.817  | 1.894  | 1.00 | 0.00 |
| ATOM | 53 | HD3  | ARG | 4 | 27.763 | -9.482  | 1.297  | 1.00 | 0.00 |
| ATOM | 54 | NE   | ARG | 4 | 26.343 | -8.326  | 0.251  | 1.00 | 0.00 |
| ATOM | 55 | HE   | ARG | 4 | 25.996 | -9.031  | -0.384 | 1.00 | 0.00 |
| ATOM | 56 | CZ   | ARG | 4 | 26.169 | -7.069  | -0.057 | 1.00 | 0.00 |
| ATOM | 57 | NH1  | ARG | 4 | 27.168 | -6.233  | 0.027  | 1.00 | 0.00 |
| ATOM | 58 | HH11 | ARG | 4 | 28.074 | -6.562  | 0.330  | 1.00 | 0.00 |
| ATOM | 59 | HH12 | ARG | 4 | 27.031 | -5.262  | -0.212 | 1.00 | 0.00 |
| ATOM | 60 | NH2  | ARG | 4 | 24.998 | -6.648  | -0.448 | 1.00 | 0.00 |
| ATOM | 61 | HH21 | ARG | 4 | 24.227 | -7.298  | -0.512 | 1.00 | 0.00 |
| ATOM | 62 | HH22 | ARG | 4 | 24.868 | -5.675  | -0.685 | 1.00 | 0.00 |
| ATOM | 63 | C    | ARG | 4 | 23.034 | -7.402  | 4.193  | 1.00 | 0.00 |
| ATOM | 64 | O    | ARG | 4 | 23.229 | -6.632  | 5.112  | 1.00 | 0.00 |
| ATOM | 65 | N    | ARG | 5 | 21.980 | -7.293  | 3.430  | 1.00 | 0.00 |
| ATOM | 66 | H    | ARG | 5 | 21.812 | -7.929  | 2.663  | 1.00 | 0.00 |

|      |    |      |     |   |        |        |        |      |      |
|------|----|------|-----|---|--------|--------|--------|------|------|
| ATOM | 67 | CA   | ARG | 5 | 20.989 | -6.209 | 3.680  | 1.00 | 0.00 |
| ATOM | 68 | HA   | ARG | 5 | 21.461 | -5.233 | 3.573  | 1.00 | 0.00 |
| ATOM | 69 | CB   | ARG | 5 | 19.850 | -6.316 | 2.663  | 1.00 | 0.00 |
| ATOM | 70 | HB2  | ARG | 5 | 19.398 | -7.306 | 2.726  | 1.00 | 0.00 |
| ATOM | 71 | HB3  | ARG | 5 | 19.097 | -5.558 | 2.879  | 1.00 | 0.00 |
| ATOM | 72 | CG   | ARG | 5 | 20.403 | -6.098 | 1.253  | 1.00 | 0.00 |
| ATOM | 73 | HG2  | ARG | 5 | 20.915 | -5.137 | 1.207  | 1.00 | 0.00 |
| ATOM | 74 | HG3  | ARG | 5 | 21.106 | -6.896 | 1.010  | 1.00 | 0.00 |
| ATOM | 75 | CD   | ARG | 5 | 19.251 | -6.110 | 0.247  | 1.00 | 0.00 |
| ATOM | 76 | HD2  | ARG | 5 | 18.653 | -7.013 | 0.369  | 1.00 | 0.00 |
| ATOM | 77 | HD3  | ARG | 5 | 18.619 | -5.234 | 0.387  | 1.00 | 0.00 |
| ATOM | 78 | NE   | ARG | 5 | 19.801 | -6.086 | -1.138 | 1.00 | 0.00 |
| ATOM | 79 | HE   | ARG | 5 | 20.328 | -5.297 | -1.483 | 1.00 | 0.00 |
| ATOM | 80 | CZ   | ARG | 5 | 19.606 | -7.101 | -1.935 | 1.00 | 0.00 |
| ATOM | 81 | NH1  | ARG | 5 | 18.405 | -7.588 | -2.091 | 1.00 | 0.00 |
| ATOM | 82 | HH11 | ARG | 5 | 17.628 | -7.177 | -1.593 | 1.00 | 0.00 |
| ATOM | 83 | HH12 | ARG | 5 | 18.258 | -8.374 | -2.709 | 1.00 | 0.00 |
| ATOM | 84 | NH2  | ARG | 5 | 20.612 | -7.629 | -2.576 | 1.00 | 0.00 |
| ATOM | 85 | HH21 | ARG | 5 | 21.540 | -7.250 | -2.453 | 1.00 | 0.00 |
| ATOM | 86 | HH22 | ARG | 5 | 20.458 | -8.415 | -3.192 | 1.00 | 0.00 |
| ATOM | 87 | C    | ARG | 5 | 20.425 | -6.347 | 5.095  | 1.00 | 0.00 |
| ATOM | 88 | O    | ARG | 5 | 20.073 | -5.373 | 5.730  | 1.00 | 0.00 |

|      |     |     |     |   |        |         |       |      |      |
|------|-----|-----|-----|---|--------|---------|-------|------|------|
| ATOM | 89  | N   | GLU | 6 | 20.335 | -7.550  | 5.593 | 1.00 | 0.00 |
| ATOM | 90  | H   | GLU | 6 | 20.625 | -8.365  | 5.070 | 1.00 | 0.00 |
| ATOM | 91  | CA  | GLU | 6 | 19.793 | -7.748  | 6.967 | 1.00 | 0.00 |
| ATOM | 92  | HA  | GLU | 6 | 18.769 | -7.380  | 7.026 | 1.00 | 0.00 |
| ATOM | 93  | CB  | GLU | 6 | 19.797 | -9.240  | 7.308 | 1.00 | 0.00 |
| ATOM | 94  | HB2 | GLU | 6 | 20.808 | -9.635  | 7.203 | 1.00 | 0.00 |
| ATOM | 95  | HB3 | GLU | 6 | 19.458 | -9.380  | 8.335 | 1.00 | 0.00 |
| ATOM | 96  | CG  | GLU | 6 | 18.858 | -9.983  | 6.356 | 1.00 | 0.00 |
| ATOM | 97  | HG2 | GLU | 6 | 17.853 | -9.570  | 6.437 | 1.00 | 0.00 |
| ATOM | 98  | HG3 | GLU | 6 | 19.215 | -9.870  | 5.332 | 1.00 | 0.00 |
| ATOM | 99  | CD  | GLU | 6 | 18.830 | -11.467 | 6.724 | 1.00 | 0.00 |
| ATOM | 100 | OE1 | GLU | 6 | 19.628 | -11.868 | 7.555 | 1.00 | 0.00 |
| ATOM | 101 | OE2 | GLU | 6 | 18.008 | -12.179 | 6.169 | 1.00 | 0.00 |
| ATOM | 102 | C   | GLU | 6 | 20.665 | -6.992  | 7.972 | 1.00 | 0.00 |
| ATOM | 103 | O   | GLU | 6 | 20.190 | -6.515  | 8.984 | 1.00 | 0.00 |
| ATOM | 104 | N   | ARG | 7 | 21.936 | -6.878  | 7.702 | 1.00 | 0.00 |
| ATOM | 105 | H   | ARG | 7 | 22.338 | -7.273  | 6.863 | 1.00 | 0.00 |
| ATOM | 106 | CA  | ARG | 7 | 22.835 | -6.152  | 8.642 | 1.00 | 0.00 |
| ATOM | 107 | HA  | ARG | 7 | 22.937 | -6.709  | 9.573 | 1.00 | 0.00 |
| ATOM | 108 | CB  | ARG | 7 | 24.220 | -5.999  | 8.010 | 1.00 | 0.00 |
| ATOM | 109 | HB2 | ARG | 7 | 24.591 | -6.978  | 7.706 | 1.00 | 0.00 |
| ATOM | 110 | HB3 | ARG | 7 | 24.152 | -5.350  | 7.137 | 1.00 | 0.00 |

|      |     |      |     |   |        |        |        |      |      |
|------|-----|------|-----|---|--------|--------|--------|------|------|
| ATOM | 111 | CG   | ARG | 7 | 25.181 | -5.384 | 9.029  | 1.00 | 0.00 |
| ATOM | 112 | HG2  | ARG | 7 | 24.793 | -4.421 | 9.360  | 1.00 | 0.00 |
| ATOM | 113 | HG3  | ARG | 7 | 25.278 | -6.051 | 9.886  | 1.00 | 0.00 |
| ATOM | 114 | CD   | ARG | 7 | 26.553 | -5.185 | 8.381  | 1.00 | 0.00 |
| ATOM | 115 | HD2  | ARG | 7 | 26.915 | -6.126 | 7.966  | 1.00 | 0.00 |
| ATOM | 116 | HD3  | ARG | 7 | 26.492 | -4.439 | 7.589  | 1.00 | 0.00 |
| ATOM | 117 | NE   | ARG | 7 | 27.523 | -4.712 | 9.409  | 1.00 | 0.00 |
| ATOM | 118 | HE   | ARG | 7 | 27.951 | -5.351 | 10.065 | 1.00 | 0.00 |
| ATOM | 119 | CZ   | ARG | 7 | 27.837 | -3.447 | 9.476  | 1.00 | 0.00 |
| ATOM | 120 | NH1  | ARG | 7 | 27.246 | -2.674 | 10.345 | 1.00 | 0.00 |
| ATOM | 121 | HH11 | ARG | 7 | 26.547 | -3.058 | 10.964 | 1.00 | 0.00 |
| ATOM | 122 | HH12 | ARG | 7 | 27.491 | -1.696 | 10.395 | 1.00 | 0.00 |
| ATOM | 123 | NH2  | ARG | 7 | 28.742 | -2.956 | 8.674  | 1.00 | 0.00 |
| ATOM | 124 | HH21 | ARG | 7 | 29.198 | -3.558 | 8.003  | 1.00 | 0.00 |
| ATOM | 125 | HH22 | ARG | 7 | 28.983 | -1.977 | 8.728  | 1.00 | 0.00 |
| ATOM | 126 | C    | ARG | 7 | 22.254 | -4.768 | 8.937  | 1.00 | 0.00 |
| ATOM | 127 | O    | ARG | 7 | 22.275 | -4.299 | 10.058 | 1.00 | 0.00 |
| ATOM | 128 | N    | GLY | 8 | 21.733 | -4.109 | 7.938  | 1.00 | 0.00 |
| ATOM | 129 | H    | GLY | 8 | 21.711 | -4.492 | 7.004  | 1.00 | 0.00 |
| ATOM | 130 | CA   | GLY | 8 | 21.151 | -2.755 | 8.161  | 1.00 | 0.00 |
| ATOM | 131 | HA2  | GLY | 8 | 21.927 | -2.067 | 8.495  | 1.00 | 0.00 |
| ATOM | 132 | HA3  | GLY | 8 | 20.709 | -2.383 | 7.237  | 1.00 | 0.00 |



|      |     |      |     |   |        |        |        |      |      |
|------|-----|------|-----|---|--------|--------|--------|------|------|
| ATOM | 133 | C    | GLY | 8 | 20.064 | -2.839 | 9.234  | 1.00 | 0.00 |
| ATOM | 134 | O    | GLY | 8 | 19.850 | -1.910 | 9.987  | 1.00 | 0.00 |
| ATOM | 135 | N    | ARG | 9 | 19.373 | -3.944 | 9.309  | 1.00 | 0.00 |
| ATOM | 136 | H    | ARG | 9 | 19.543 | -4.720 | 8.685  | 1.00 | 0.00 |
| ATOM | 137 | CA   | ARG | 9 | 18.301 | -4.084 | 10.335 | 1.00 | 0.00 |
| ATOM | 138 | HA   | ARG | 9 | 17.501 | -3.369 | 10.146 | 1.00 | 0.00 |
| ATOM | 139 | CB   | ARG | 9 | 17.719 | -5.497 | 10.274 | 1.00 | 0.00 |
| ATOM | 140 | HB2  | ARG | 9 | 17.356 | -5.699 | 9.266  | 1.00 | 0.00 |
| ATOM | 141 | HB3  | ARG | 9 | 18.492 | -6.221 | 10.532 | 1.00 | 0.00 |
| ATOM | 142 | CG   | ARG | 9 | 16.560 | -5.613 | 11.267 | 1.00 | 0.00 |
| ATOM | 143 | HG2  | ARG | 9 | 16.915 | -5.375 | 12.270 | 1.00 | 0.00 |
| ATOM | 144 | HG3  | ARG | 9 | 15.770 | -4.917 | 10.986 | 1.00 | 0.00 |
| ATOM | 145 | CD   | ARG | 9 | 16.012 | -7.042 | 11.247 | 1.00 | 0.00 |
| ATOM | 146 | HD2  | ARG | 9 | 15.729 | -7.324 | 10.233 | 1.00 | 0.00 |
| ATOM | 147 | HD3  | ARG | 9 | 16.762 | -7.740 | 11.621 | 1.00 | 0.00 |
| ATOM | 148 | NE   | ARG | 9 | 14.807 | -7.124 | 12.120 | 1.00 | 0.00 |
| ATOM | 149 | HE   | ARG | 9 | 13.954 | -6.636 | 11.890 | 1.00 | 0.00 |
| ATOM | 150 | CZ   | ARG | 9 | 14.840 | -7.840 | 13.210 | 1.00 | 0.00 |
| ATOM | 151 | NH1  | ARG | 9 | 15.314 | -9.055 | 13.180 | 1.00 | 0.00 |
| ATOM | 152 | HH11 | ARG | 9 | 15.655 | -9.440 | 12.310 | 1.00 | 0.00 |
| ATOM | 153 | HH12 | ARG | 9 | 15.338 | -9.606 | 14.026 | 1.00 | 0.00 |
| ATOM | 154 | NH2  | ARG | 9 | 14.399 | -7.339 | 14.332 | 1.00 | 0.00 |

|      |     |      |     |    |        |        |        |      |      |
|------|-----|------|-----|----|--------|--------|--------|------|------|
| ATOM | 155 | HH21 | ARG | 9  | 14.034 | -6.398 | 14.352 | 1.00 | 0.00 |
| ATOM | 156 | HH22 | ARG | 9  | 14.426 | -7.895 | 15.175 | 1.00 | 0.00 |
| ATOM | 157 | C    | ARG | 9  | 18.891 | -3.833 | 11.724 | 1.00 | 0.00 |
| ATOM | 158 | O    | ARG | 9  | 18.242 | -3.288 | 12.595 | 1.00 | 0.00 |
| ATOM | 159 | N    | GLN | 10 | 20.117 | -4.228 | 11.939 | 1.00 | 0.00 |
| ATOM | 160 | H    | GLN | 10 | 20.663 | -4.682 | 11.220 | 1.00 | 0.00 |
| ATOM | 161 | CA   | GLN | 10 | 20.746 | -4.012 | 13.272 | 1.00 | 0.00 |
| ATOM | 162 | HA   | GLN | 10 | 20.231 | -4.598 | 14.034 | 1.00 | 0.00 |
| ATOM | 163 | CB   | GLN | 10 | 22.209 | -4.456 | 13.221 | 1.00 | 0.00 |
| ATOM | 164 | HB2  | GLN | 10 | 22.716 | -3.946 | 12.402 | 1.00 | 0.00 |
| ATOM | 165 | HB3  | GLN | 10 | 22.699 | -4.206 | 14.162 | 1.00 | 0.00 |
| ATOM | 166 | CG   | GLN | 10 | 22.276 | -5.969 | 12.999 | 1.00 | 0.00 |
| ATOM | 167 | HG2  | GLN | 10 | 21.696 | -6.489 | 13.762 | 1.00 | 0.00 |
| ATOM | 168 | HG3  | GLN | 10 | 21.889 | -6.225 | 12.012 | 1.00 | 0.00 |
| ATOM | 169 | CD   | GLN | 10 | 23.730 | -6.434 | 13.089 | 1.00 | 0.00 |
| ATOM | 170 | OE1  | GLN | 10 | 24.391 | -6.686 | 11.992 | 1.00 | 0.00 |
| ATOM | 171 | NE2  | GLN | 10 | 24.271 | -6.570 | 14.168 | 1.00 | 0.00 |
| ATOM | 172 | HE21 | GLN | 10 | 25.232 | -6.878 | 14.212 | 1.00 | 0.00 |
| ATOM | 173 | HE22 | GLN | 10 | 23.757 | -6.375 | 15.015 | 1.00 | 0.00 |
| ATOM | 174 | C    | GLN | 10 | 20.676 | -2.527 | 13.634 | 1.00 | 0.00 |
| ATOM | 175 | O    | GLN | 10 | 20.518 | -2.166 | 14.783 | 1.00 | 0.00 |
| ATOM | 176 | N    | GLY | 11 | 20.793 | -1.664 | 12.663 | 1.00 | 0.00 |

|      |     |     |     |    |        |        |        |      |      |
|------|-----|-----|-----|----|--------|--------|--------|------|------|
| ATOM | 177 | H   | GLY | 11 | 20.925 | -1.958 | 11.706 | 1.00 | 0.00 |
| ATOM | 178 | CA  | GLY | 11 | 20.734 | -0.203 | 12.952 | 1.00 | 0.00 |
| ATOM | 179 | HA2 | GLY | 11 | 21.604 | 0.096  | 13.537 | 1.00 | 0.00 |
| ATOM | 180 | HA3 | GLY | 11 | 20.712 | 0.360  | 12.019 | 1.00 | 0.00 |
| ATOM | 181 | C   | GLY | 11 | 19.466 | 0.107  | 13.751 | 1.00 | 0.00 |
| ATOM | 182 | O   | GLY | 11 | 19.459 | 0.962  | 14.613 | 1.00 | 0.00 |
| ATOM | 183 | N   | ASP | 12 | 18.394 | -0.582 | 13.470 | 1.00 | 0.00 |
| ATOM | 184 | H   | ASP | 12 | 18.392 | -1.294 | 12.753 | 1.00 | 0.00 |
| ATOM | 185 | CA  | ASP | 12 | 17.129 | -0.325 | 14.215 | 1.00 | 0.00 |
| ATOM | 186 | HA  | ASP | 12 | 16.319 | -0.928 | 13.803 | 1.00 | 0.00 |
| ATOM | 187 | CB  | ASP | 12 | 17.317 | -0.699 | 15.686 | 1.00 | 0.00 |
| ATOM | 188 | HB2 | ASP | 12 | 18.170 | -0.156 | 16.094 | 1.00 | 0.00 |
| ATOM | 189 | HB3 | ASP | 12 | 16.419 | -0.438 | 16.245 | 1.00 | 0.00 |
| ATOM | 190 | CG  | ASP | 12 | 17.569 | -2.204 | 15.801 | 1.00 | 0.00 |
| ATOM | 191 | OD1 | ASP | 12 | 17.331 | -2.900 | 14.828 | 1.00 | 0.00 |
| ATOM | 192 | OD2 | ASP | 12 | 17.996 | -2.634 | 16.860 | 1.00 | 0.00 |
| ATOM | 193 | C   | ASP | 12 | 16.765 | 1.157  | 14.108 | 1.00 | 0.00 |
| ATOM | 194 | O   | ASP | 12 | 16.447 | 1.800  | 15.088 | 1.00 | 0.00 |
| ATOM | 195 | N   | SER | 13 | 16.810 | 1.705  | 12.924 | 1.00 | 0.00 |
| ATOM | 196 | H   | SER | 13 | 17.074 | 1.177  | 12.104 | 1.00 | 0.00 |
| ATOM | 197 | CA  | SER | 13 | 16.466 | 3.145  | 12.757 | 1.00 | 0.00 |
| ATOM | 198 | HA  | SER | 13 | 17.179 | 3.769  | 13.296 | 1.00 | 0.00 |

|      |     |     |     |    |        |        |        |      |      |
|------|-----|-----|-----|----|--------|--------|--------|------|------|
| ATOM | 199 | CB  | SER | 13 | 16.519 | 3.513  | 11.273 | 1.00 | 0.00 |
| ATOM | 200 | HB2 | SER | 13 | 15.757 | 2.952  | 10.731 | 1.00 | 0.00 |
| ATOM | 201 | HB3 | SER | 13 | 16.336 | 4.581  | 11.156 | 1.00 | 0.00 |
| ATOM | 202 | OG  | SER | 13 | 17.801 | 3.193  | 10.752 | 1.00 | 0.00 |
| ATOM | 203 | HG  | SER | 13 | 17.835 | 3.423  | 9.821  | 1.00 | 0.00 |
| ATOM | 204 | C   | SER | 13 | 15.056 | 3.396  | 13.295 | 1.00 | 0.00 |
| ATOM | 205 | O   | SER | 13 | 14.783 | 4.417  | 13.895 | 1.00 | 0.00 |
| ATOM | 206 | N   | SER | 14 | 14.159 | 2.472  | 13.085 | 1.00 | 0.00 |
| ATOM | 207 | H   | SER | 14 | 14.381 | 1.620  | 12.588 | 1.00 | 0.00 |
| ATOM | 208 | CA  | SER | 14 | 12.766 | 2.657  | 13.585 | 1.00 | 0.00 |
| ATOM | 209 | HA  | SER | 14 | 12.769 | 3.239  | 14.506 | 1.00 | 0.00 |
| ATOM | 210 | CB  | SER | 14 | 11.943 | 3.406  | 12.535 | 1.00 | 0.00 |
| ATOM | 211 | HB2 | SER | 14 | 12.360 | 4.402  | 12.389 | 1.00 | 0.00 |
| ATOM | 212 | HB3 | SER | 14 | 11.971 | 2.859  | 11.592 | 1.00 | 0.00 |
| ATOM | 213 | OG  | SER | 14 | 10.598 | 3.516  | 12.979 | 1.00 | 0.00 |
| ATOM | 214 | HG  | SER | 14 | 10.081 | 3.985  | 12.320 | 1.00 | 0.00 |
| ATOM | 215 | C   | SER | 14 | 12.136 | 1.287  | 13.845 | 1.00 | 0.00 |
| ATOM | 216 | O   | SER | 14 | 12.225 | 0.387  | 13.035 | 1.00 | 0.00 |
| ATOM | 217 | N   | SER | 15 | 11.500 | 1.122  | 14.974 | 1.00 | 0.00 |
| ATOM | 218 | H   | SER | 15 | 11.423 | 1.864  | 15.655 | 1.00 | 0.00 |
| ATOM | 219 | CA  | SER | 15 | 10.867 | -0.190 | 15.285 | 1.00 | 0.00 |
| ATOM | 220 | HA  | SER | 15 | 11.551 | -1.006 | 15.050 | 1.00 | 0.00 |

|      |     |     |     |    |        |        |        |      |      |
|------|-----|-----|-----|----|--------|--------|--------|------|------|
| ATOM | 221 | CB  | SER | 15 | 10.527 | -0.251 | 16.776 | 1.00 | 0.00 |
| ATOM | 222 | HB2 | SER | 15 | 10.190 | -1.256 | 17.032 | 1.00 | 0.00 |
| ATOM | 223 | HB3 | SER | 15 | 11.413 | -0.006 | 17.362 | 1.00 | 0.00 |
| ATOM | 224 | OG  | SER | 15 | 9.496  | 0.682  | 17.064 | 1.00 | 0.00 |
| ATOM | 225 | HG  | SER | 15 | 9.283  | 0.644  | 17.999 | 1.00 | 0.00 |
| ATOM | 226 | C   | SER | 15 | 9.587  | -0.351 | 14.462 | 1.00 | 0.00 |
| ATOM | 227 | O   | SER | 15 | 9.167  | -1.450 | 14.160 | 1.00 | 0.00 |
| ATOM | 228 | N   | CYX | 16 | 8.964  | 0.737  | 14.095 | 1.00 | 0.00 |
| ATOM | 229 | H   | CYX | 16 | 9.306  | 1.654  | 14.342 | 1.00 | 0.00 |
| ATOM | 230 | CA  | CYX | 16 | 7.714  | 0.642  | 13.289 | 1.00 | 0.00 |
| ATOM | 231 | HA  | CYX | 16 | 6.953  | 0.086  | 13.837 | 1.00 | 0.00 |
| ATOM | 232 | CB  | CYX | 16 | 7.182  | 2.047  | 13.002 | 1.00 | 0.00 |
| ATOM | 233 | HB2 | CYX | 16 | 7.205  | 2.638  | 13.917 | 1.00 | 0.00 |
| ATOM | 234 | HB3 | CYX | 16 | 7.805  | 2.524  | 12.246 | 1.00 | 0.00 |
| ATOM | 235 | SG  | CYX | 16 | 5.459  | 1.941  | 12.455 | 1.00 | 0.00 |
| ATOM | 236 | C   | CYX | 16 | 8.015  | -0.069 | 11.968 | 1.00 | 0.00 |
| ATOM | 237 | O   | CYX | 16 | 7.145  | -0.655 | 11.355 | 1.00 | 0.00 |
| ATOM | 238 | N   | GLU | 17 | 9.241  | -0.022 | 11.525 | 1.00 | 0.00 |
| ATOM | 239 | H   | GLU | 17 | 9.969  | 0.463  | 12.029 | 1.00 | 0.00 |
| ATOM | 240 | CA  | GLU | 17 | 9.597  | -0.695 | 10.245 | 1.00 | 0.00 |
| ATOM | 241 | HA  | GLU | 17 | 8.997  | -0.296 | 9.427  | 1.00 | 0.00 |
| ATOM | 242 | CB  | GLU | 17 | 11.074 | -0.447 | 9.934  | 1.00 | 0.00 |

|      |     |     |     |    |        |        |        |      |      |
|------|-----|-----|-----|----|--------|--------|--------|------|------|
| ATOM | 243 | HB2 | GLU | 17 | 11.665 | -0.580 | 10.841 | 1.00 | 0.00 |
| ATOM | 244 | HB3 | GLU | 17 | 11.410 | -1.154 | 9.175  | 1.00 | 0.00 |
| ATOM | 245 | CG  | GLU | 17 | 11.252 | 0.982  | 9.414  | 1.00 | 0.00 |
| ATOM | 246 | HG2 | GLU | 17 | 10.626 | 1.129  | 8.534  | 1.00 | 0.00 |
| ATOM | 247 | HG3 | GLU | 17 | 10.961 | 1.690  | 10.189 | 1.00 | 0.00 |
| ATOM | 248 | CD  | GLU | 17 | 12.718 | 1.209  | 9.040  | 1.00 | 0.00 |
| ATOM | 249 | OE1 | GLU | 17 | 13.489 | 0.271  | 9.148  | 1.00 | 0.00 |
| ATOM | 250 | OE2 | GLU | 17 | 13.044 | 2.319  | 8.652  | 1.00 | 0.00 |
| ATOM | 251 | C   | GLU | 17 | 9.347  | -2.199 | 10.374 | 1.00 | 0.00 |
| ATOM | 252 | O   | GLU | 17 | 8.731  | -2.810 | 9.523  | 1.00 | 0.00 |
| ATOM | 253 | N   | ARG | 18 | 9.820  | -2.801 | 11.431 | 1.00 | 0.00 |
| ATOM | 254 | H   | ARG | 18 | 10.332 | -2.300 | 12.143 | 1.00 | 0.00 |
| ATOM | 255 | CA  | ARG | 18 | 9.609  | -4.266 | 11.612 | 1.00 | 0.00 |
| ATOM | 256 | HA  | ARG | 18 | 10.190 | -4.825 | 10.878 | 1.00 | 0.00 |
| ATOM | 257 | CB  | ARG | 18 | 10.065 | -4.679 | 13.013 | 1.00 | 0.00 |
| ATOM | 258 | HB2 | ARG | 18 | 11.120 | -4.435 | 13.140 | 1.00 | 0.00 |
| ATOM | 259 | HB3 | ARG | 18 | 9.477  | -4.146 | 13.760 | 1.00 | 0.00 |
| ATOM | 260 | CG  | ARG | 18 | 9.867  | -6.186 | 13.189 | 1.00 | 0.00 |
| ATOM | 261 | HG2 | ARG | 18 | 8.819  | -6.437 | 13.028 | 1.00 | 0.00 |
| ATOM | 262 | HG3 | ARG | 18 | 10.483 | -6.721 | 12.466 | 1.00 | 0.00 |
| ATOM | 263 | CD  | ARG | 18 | 10.276 | -6.592 | 14.607 | 1.00 | 0.00 |
| ATOM | 264 | HD2 | ARG | 18 | 10.347 | -7.677 | 14.683 | 1.00 | 0.00 |

|      |     |      |     |    |        |        |        |      |      |
|------|-----|------|-----|----|--------|--------|--------|------|------|
| ATOM | 265 | HD3  | ARG | 18 | 11.237 | -6.147 | 14.864 | 1.00 | 0.00 |
| ATOM | 266 | NE   | ARG | 18 | 9.252  | -6.111 | 15.577 | 1.00 | 0.00 |
| ATOM | 267 | HE   | ARG | 18 | 8.494  | -5.510 | 15.288 | 1.00 | 0.00 |
| ATOM | 268 | CZ   | ARG | 18 | 9.324  | -6.464 | 16.832 | 1.00 | 0.00 |
| ATOM | 269 | NH1  | ARG | 18 | 9.824  | -5.642 | 17.714 | 1.00 | 0.00 |
| ATOM | 270 | HH11 | ARG | 18 | 10.155 | -4.734 | 17.422 | 1.00 | 0.00 |
| ATOM | 271 | HH12 | ARG | 18 | 9.878  | -5.919 | 18.684 | 1.00 | 0.00 |
| ATOM | 272 | NH2  | ARG | 18 | 8.897  | -7.640 | 17.203 | 1.00 | 0.00 |
| ATOM | 273 | HH21 | ARG | 18 | 8.512  | -8.274 | 16.517 | 1.00 | 0.00 |
| ATOM | 274 | HH22 | ARG | 18 | 8.954  | -7.912 | 18.174 | 1.00 | 0.00 |
| ATOM | 275 | C    | ARG | 18 | 8.123  | -4.591 | 11.444 | 1.00 | 0.00 |
| ATOM | 276 | O    | ARG | 18 | 7.751  | -5.717 | 11.177 | 1.00 | 0.00 |
| ATOM | 277 | N    | GLN | 19 | 7.270  | -3.616 | 11.601 | 1.00 | 0.00 |
| ATOM | 278 | H    | GLN | 19 | 7.571  | -2.679 | 11.825 | 1.00 | 0.00 |
| ATOM | 279 | CA   | GLN | 19 | 5.811  | -3.873 | 11.453 | 1.00 | 0.00 |
| ATOM | 280 | HA   | GLN | 19 | 5.539  | -4.805 | 11.949 | 1.00 | 0.00 |
| ATOM | 281 | CB   | GLN | 19 | 5.024  | -2.729 | 12.095 | 1.00 | 0.00 |
| ATOM | 282 | HB2  | GLN | 19 | 5.421  | -1.775 | 11.749 | 1.00 | 0.00 |
| ATOM | 283 | HB3  | GLN | 19 | 3.974  | -2.809 | 11.816 | 1.00 | 0.00 |
| ATOM | 284 | CG   | GLN | 19 | 5.155  | -2.813 | 13.617 | 1.00 | 0.00 |
| ATOM | 285 | HG2  | GLN | 19 | 4.896  | -3.814 | 13.963 | 1.00 | 0.00 |
| ATOM | 286 | HG3  | GLN | 19 | 6.174  | -2.576 | 13.923 | 1.00 | 0.00 |

|      |     |      |     |    |       |        |        |      |      |
|------|-----|------|-----|----|-------|--------|--------|------|------|
| ATOM | 287 | CD   | GLN | 19 | 4.203 | -1.809 | 14.269 | 1.00 | 0.00 |
| ATOM | 288 | OE1  | GLN | 19 | 3.724 | -0.899 | 13.622 | 1.00 | 0.00 |
| ATOM | 289 | NE2  | GLN | 19 | 3.906 | -1.935 | 15.534 | 1.00 | 0.00 |
| ATOM | 290 | HE21 | GLN | 19 | 3.278 | -1.276 | 15.970 | 1.00 | 0.00 |
| ATOM | 291 | HE22 | GLN | 19 | 4.306 | -2.692 | 16.070 | 1.00 | 0.00 |
| ATOM | 292 | C    | GLN | 19 | 5.455 | -3.968 | 9.967  | 1.00 | 0.00 |
| ATOM | 293 | O    | GLN | 19 | 4.424 | -4.496 | 9.600  | 1.00 | 0.00 |
| ATOM | 294 | N    | VAL | 20 | 6.299 | -3.464 | 9.108  | 1.00 | 0.00 |
| ATOM | 295 | H    | VAL | 20 | 7.158 | -3.022 | 9.403  | 1.00 | 0.00 |
| ATOM | 296 | CA   | VAL | 20 | 6.003 | -3.530 | 7.649  | 1.00 | 0.00 |
| ATOM | 297 | HA   | VAL | 20 | 4.965 | -3.257 | 7.462  | 1.00 | 0.00 |
| ATOM | 298 | CB   | VAL | 20 | 6.910 | -2.553 | 6.896  | 1.00 | 0.00 |
| ATOM | 299 | HB   | VAL | 20 | 6.918 | -1.595 | 7.414  | 1.00 | 0.00 |
| ATOM | 300 | CG1  | VAL | 20 | 8.333 | -3.112 | 6.836  | 1.00 | 0.00 |
| ATOM | 301 | HG11 | VAL | 20 | 8.326 | -4.071 | 6.317  | 1.00 | 0.00 |
| ATOM | 302 | HG12 | VAL | 20 | 8.976 | -2.415 | 6.299  | 1.00 | 0.00 |
| ATOM | 303 | HG13 | VAL | 20 | 8.713 | -3.250 | 7.848  | 1.00 | 0.00 |
| ATOM | 304 | CG2  | VAL | 20 | 6.380 | -2.359 | 5.474  | 1.00 | 0.00 |
| ATOM | 305 | HG21 | VAL | 20 | 5.368 | -1.958 | 5.515  | 1.00 | 0.00 |
| ATOM | 306 | HG22 | VAL | 20 | 7.025 | -1.664 | 4.937  | 1.00 | 0.00 |
| ATOM | 307 | HG23 | VAL | 20 | 6.369 | -3.318 | 4.956  | 1.00 | 0.00 |
| ATOM | 308 | C    | VAL | 20 | 6.252 | -4.954 | 7.145  | 1.00 | 0.00 |



|      |     |     |     |    |        |        |        |      |      |
|------|-----|-----|-----|----|--------|--------|--------|------|------|
| ATOM | 309 | O   | VAL | 20 | 5.597  | -5.423 | 6.234  | 1.00 | 0.00 |
| ATOM | 310 | N   | ASP | 21 | 7.192  | -5.646 | 7.730  | 1.00 | 0.00 |
| ATOM | 311 | H   | ASP | 21 | 7.741  | -5.262 | 8.486  | 1.00 | 0.00 |
| ATOM | 312 | CA  | ASP | 21 | 7.480  | -7.038 | 7.285  | 1.00 | 0.00 |
| ATOM | 313 | HA  | ASP | 21 | 7.893  | -7.035 | 6.276  | 1.00 | 0.00 |
| ATOM | 314 | CB  | ASP | 21 | 8.501  | -7.674 | 8.228  | 1.00 | 0.00 |
| ATOM | 315 | HB2 | ASP | 21 | 8.191  | -7.517 | 9.261  | 1.00 | 0.00 |
| ATOM | 316 | HB3 | ASP | 21 | 8.565  | -8.744 | 8.027  | 1.00 | 0.00 |
| ATOM | 317 | CG  | ASP | 21 | 9.872  | -7.031 | 8.004  | 1.00 | 0.00 |
| ATOM | 318 | OD1 | ASP | 21 | 9.991  | -6.247 | 7.076  | 1.00 | 0.00 |
| ATOM | 319 | OD2 | ASP | 21 | 10.777 | -7.333 | 8.763  | 1.00 | 0.00 |
| ATOM | 320 | C   | ASP | 21 | 6.188  | -7.858 | 7.303  | 1.00 | 0.00 |
| ATOM | 321 | O   | ASP | 21 | 6.006  | -8.765 | 6.516  | 1.00 | 0.00 |
| ATOM | 322 | N   | ARG | 22 | 5.290  | -7.544 | 8.195  | 1.00 | 0.00 |
| ATOM | 323 | H   | ARG | 22 | 5.435  | -6.792 | 8.853  | 1.00 | 0.00 |
| ATOM | 324 | CA  | ARG | 22 | 4.010  | -8.305 | 8.262  | 1.00 | 0.00 |
| ATOM | 325 | HA  | ARG | 22 | 4.197  | -9.372 | 8.134  | 1.00 | 0.00 |
| ATOM | 326 | CB  | ARG | 22 | 3.355  | -8.083 | 9.628  | 1.00 | 0.00 |
| ATOM | 327 | HB2 | ARG | 22 | 4.075  | -8.302 | 10.417 | 1.00 | 0.00 |
| ATOM | 328 | HB3 | ARG | 22 | 3.030  | -7.047 | 9.711  | 1.00 | 0.00 |
| ATOM | 329 | CG  | ARG | 22 | 2.147  | -9.009 | 9.770  | 1.00 | 0.00 |
| ATOM | 330 | HG2 | ARG | 22 | 1.473  | -8.860 | 8.927  | 1.00 | 0.00 |

|      |     |          |    |        |         |        |      |      |
|------|-----|----------|----|--------|---------|--------|------|------|
| ATOM | 331 | HG3 ARG  | 22 | 2.483  | -10.046 | 9.786  | 1.00 | 0.00 |
| ATOM | 332 | CD ARG   | 22 | 1.411  | -8.691  | 11.074 | 1.00 | 0.00 |
| ATOM | 333 | HD2 ARG  | 22 | 2.109  | -8.692  | 11.911 | 1.00 | 0.00 |
| ATOM | 334 | HD3 ARG  | 22 | 0.927  | -7.717  | 11.006 | 1.00 | 0.00 |
| ATOM | 335 | NE ARG   | 22 | 0.368  | -9.727  | 11.321 | 1.00 | 0.00 |
| ATOM | 336 | HE ARG   | 22 | 0.243  | -10.145 | 12.232 | 1.00 | 0.00 |
| ATOM | 337 | CZ ARG   | 22 | -0.409 | -10.114 | 10.346 | 1.00 | 0.00 |
| ATOM | 338 | NH1 ARG  | 22 | -1.643 | -9.691  | 10.288 | 1.00 | 0.00 |
| ATOM | 339 | HH11 ARG | 22 | -1.993 | -9.065  | 10.999 | 1.00 | 0.00 |
| ATOM | 340 | HH12 ARG | 22 | -2.242 | -9.993  | 9.532  | 1.00 | 0.00 |
| ATOM | 341 | NH2 ARG  | 22 | 0.046  | -10.924 | 9.430  | 1.00 | 0.00 |
| ATOM | 342 | HH21 ARG | 22 | 1.001  | -11.251 | 9.478  | 1.00 | 0.00 |
| ATOM | 343 | HH22 ARG | 22 | -0.558 | -11.221 | 8.677  | 1.00 | 0.00 |
| ATOM | 344 | C ARG    | 22 | 3.072  | -7.818  | 7.159  | 1.00 | 0.00 |
| ATOM | 345 | O ARG    | 22 | 2.118  | -8.481  | 6.803  | 1.00 | 0.00 |
| ATOM | 346 | N VAL    | 23 | 3.334  | -6.662  | 6.613  | 1.00 | 0.00 |
| ATOM | 347 | H VAL    | 23 | 4.125  | -6.106  | 6.905  | 1.00 | 0.00 |
| ATOM | 348 | CA VAL   | 23 | 2.458  | -6.131  | 5.531  | 1.00 | 0.00 |
| ATOM | 349 | HA VAL   | 23 | 1.536  | -5.732  | 5.952  | 1.00 | 0.00 |
| ATOM | 350 | CB VAL   | 23 | 3.186  | -5.006  | 4.792  | 1.00 | 0.00 |
| ATOM | 351 | HB VAL   | 23 | 4.193  | -5.333  | 4.532  | 1.00 | 0.00 |
| ATOM | 352 | CG1 VAL  | 23 | 2.419  | -4.655  | 3.515  | 1.00 | 0.00 |

|      |     |      |     |    |       |         |       |      |      |
|------|-----|------|-----|----|-------|---------|-------|------|------|
| ATOM | 353 | HG11 | VAL | 23 | 1.412 | -4.328  | 3.774 | 1.00 | 0.00 |
| ATOM | 354 | HG12 | VAL | 23 | 2.937 | -3.854  | 2.988 | 1.00 | 0.00 |
| ATOM | 355 | HG13 | VAL | 23 | 2.361 | -5.534  | 2.872 | 1.00 | 0.00 |
| ATOM | 356 | CG2  | VAL | 23 | 3.268 | -3.773  | 5.694 | 1.00 | 0.00 |
| ATOM | 357 | HG21 | VAL | 23 | 3.815 | -4.024  | 6.603 | 1.00 | 0.00 |
| ATOM | 358 | HG22 | VAL | 23 | 3.787 | -2.972  | 5.168 | 1.00 | 0.00 |
| ATOM | 359 | HG23 | VAL | 23 | 2.262 | -3.445  | 5.954 | 1.00 | 0.00 |
| ATOM | 360 | C    | VAL | 23 | 2.124 | -7.254  | 4.548 | 1.00 | 0.00 |
| ATOM | 361 | O    | VAL | 23 | 1.086 | -7.879  | 4.633 | 1.00 | 0.00 |
| ATOM | 362 | N    | ASN | 24 | 2.997 | -7.514  | 3.616 | 1.00 | 0.00 |
| ATOM | 363 | H    | ASN | 24 | 3.862 | -6.999  | 3.541 | 1.00 | 0.00 |
| ATOM | 364 | CA   | ASN | 24 | 2.731 | -8.595  | 2.627 | 1.00 | 0.00 |
| ATOM | 365 | HA   | ASN | 24 | 3.501 | -8.601  | 1.856 | 1.00 | 0.00 |
| ATOM | 366 | CB   | ASN | 24 | 2.742 | -9.949  | 3.339 | 1.00 | 0.00 |
| ATOM | 367 | HB2  | ASN | 24 | 1.973 | -9.977  | 4.110 | 1.00 | 0.00 |
| ATOM | 368 | HB3  | ASN | 24 | 2.569 | -10.754 | 2.624 | 1.00 | 0.00 |
| ATOM | 369 | CG   | ASN | 24 | 4.105 | -10.167 | 4.000 | 1.00 | 0.00 |
| ATOM | 370 | OD1  | ASN | 24 | 5.073 | -9.520  | 3.650 | 1.00 | 0.00 |
| ATOM | 371 | ND2  | ASN | 24 | 4.223 | -11.057 | 4.947 | 1.00 | 0.00 |
| ATOM | 372 | HD21 | ASN | 24 | 5.120 | -11.206 | 5.387 | 1.00 | 0.00 |
| ATOM | 373 | HD22 | ASN | 24 | 3.417 | -11.593 | 5.235 | 1.00 | 0.00 |
| ATOM | 374 | C    | ASN | 24 | 1.362 | -8.367  | 1.981 | 1.00 | 0.00 |

|      |     |      |     |    |        |        |        |      |      |
|------|-----|------|-----|----|--------|--------|--------|------|------|
| ATOM | 375 | O    | ASN | 24 | 0.400  | -9.041 | 2.289  | 1.00 | 0.00 |
| ATOM | 376 | N    | LEU | 25 | 1.268  | -7.422 | 1.087  | 1.00 | 0.00 |
| ATOM | 377 | H    | LEU | 25 | 2.065  | -6.860 | 0.825  | 1.00 | 0.00 |
| ATOM | 378 | CA   | LEU | 25 | -0.038 | -7.151 | 0.422  | 1.00 | 0.00 |
| ATOM | 379 | HA   | LEU | 25 | -0.833 | -7.722 | 0.902  | 1.00 | 0.00 |
| ATOM | 380 | CB   | LEU | 25 | -0.368 | -5.661 | 0.537  | 1.00 | 0.00 |
| ATOM | 381 | HB2  | LEU | 25 | 0.524  | -5.074 | 0.319  | 1.00 | 0.00 |
| ATOM | 382 | HB3  | LEU | 25 | -1.153 | -5.407 | -0.175 | 1.00 | 0.00 |
| ATOM | 383 | CG   | LEU | 25 | -0.848 | -5.352 | 1.957  | 1.00 | 0.00 |
| ATOM | 384 | HG   | LEU | 25 | -0.208 | -5.864 | 2.676  | 1.00 | 0.00 |
| ATOM | 385 | CD1  | LEU | 25 | -0.785 | -3.844 | 2.201  | 1.00 | 0.00 |
| ATOM | 386 | HD11 | LEU | 25 | -1.425 | -3.333 | 1.482  | 1.00 | 0.00 |
| ATOM | 387 | HD12 | LEU | 25 | -1.127 | -3.625 | 3.212  | 1.00 | 0.00 |
| ATOM | 388 | HD13 | LEU | 25 | 0.242  | -3.499 | 2.082  | 1.00 | 0.00 |
| ATOM | 389 | CD2  | LEU | 25 | -2.291 | -5.836 | 2.124  | 1.00 | 0.00 |
| ATOM | 390 | HD21 | LEU | 25 | -2.336 | -6.912 | 1.951  | 1.00 | 0.00 |
| ATOM | 391 | HD22 | LEU | 25 | -2.633 | -5.617 | 3.135  | 1.00 | 0.00 |
| ATOM | 392 | HD23 | LEU | 25 | -2.931 | -5.326 | 1.405  | 1.00 | 0.00 |
| ATOM | 393 | C    | LEU | 25 | 0.054  | -7.540 | -1.055 | 1.00 | 0.00 |
| ATOM | 394 | O    | LEU | 25 | 0.026  | -6.699 | -1.932 | 1.00 | 0.00 |
| ATOM | 395 | N    | LYS | 26 | 0.163  | -8.810 | -1.337 | 1.00 | 0.00 |
| ATOM | 396 | H    | LYS | 26 | 0.191  | -9.511 | -0.610 | 1.00 | 0.00 |

|      |     |     |     |    |        |         |        |      |      |
|------|-----|-----|-----|----|--------|---------|--------|------|------|
| ATOM | 397 | CA  | LYS | 26 | 0.259  | -9.258  | -2.755 | 1.00 | 0.00 |
| ATOM | 398 | HA  | LYS | 26 | 1.048  | -8.713  | -3.273 | 1.00 | 0.00 |
| ATOM | 399 | CB  | LYS | 26 | 0.591  | -10.751 | -2.793 | 1.00 | 0.00 |
| ATOM | 400 | HB2 | LYS | 26 | 1.448  | -10.950 | -2.150 | 1.00 | 0.00 |
| ATOM | 401 | HB3 | LYS | 26 | -0.267 | -11.324 | -2.442 | 1.00 | 0.00 |
| ATOM | 402 | CG  | LYS | 26 | 0.925  | -11.162 | -4.229 | 1.00 | 0.00 |
| ATOM | 403 | HG2 | LYS | 26 | 0.358  | -12.055 | -4.493 | 1.00 | 0.00 |
| ATOM | 404 | HG3 | LYS | 26 | 0.664  | -10.352 | -4.909 | 1.00 | 0.00 |
| ATOM | 405 | CD  | LYS | 26 | 2.422  | -11.458 | -4.340 | 1.00 | 0.00 |
| ATOM | 406 | HD2 | LYS | 26 | 2.817  | -11.003 | -5.248 | 1.00 | 0.00 |
| ATOM | 407 | HD3 | LYS | 26 | 2.939  | -11.047 | -3.473 | 1.00 | 0.00 |
| ATOM | 408 | CE  | LYS | 26 | 2.641  | -12.972 | -4.393 | 1.00 | 0.00 |
| ATOM | 409 | HE2 | LYS | 26 | 2.956  | -13.329 | -3.412 | 1.00 | 0.00 |
| ATOM | 410 | HE3 | LYS | 26 | 1.711  | -13.465 | -4.677 | 1.00 | 0.00 |
| ATOM | 411 | NZ  | LYS | 26 | 3.696  | -13.287 | -5.397 | 1.00 | 0.00 |
| ATOM | 412 | HZ1 | LYS | 26 | 4.558  | -12.832 | -5.134 | 1.00 | 0.00 |
| ATOM | 413 | HZ2 | LYS | 26 | 3.840  | -14.286 | -5.432 | 1.00 | 0.00 |
| ATOM | 414 | HZ3 | LYS | 26 | 3.405  | -12.958 | -6.306 | 1.00 | 0.00 |
| ATOM | 415 | C   | LYS | 26 | -1.068 | -9.013  | -3.485 | 1.00 | 0.00 |
| ATOM | 416 | O   | LYS | 26 | -1.079 | -8.659  | -4.647 | 1.00 | 0.00 |
| ATOM | 417 | N   | PRO | 27 | -2.213 | -9.210  | -2.803 | 1.00 | 0.00 |
| ATOM | 418 | CD  | PRO | 27 | -2.322 | -9.635  | -1.393 | 1.00 | 0.00 |

|      |     |         |    |        |         |        |      |      |
|------|-----|---------|----|--------|---------|--------|------|------|
| ATOM | 419 | HD2 PRO | 27 | -1.633 | -9.053  | -0.781 | 1.00 | 0.00 |
| ATOM | 420 | HD3 PRO | 27 | -2.074 | -10.694 | -1.310 | 1.00 | 0.00 |
| ATOM | 421 | CG PRO  | 27 | -3.761 | -9.356  | -1.066 | 1.00 | 0.00 |
| ATOM | 422 | HG2 PRO | 27 | -3.854 | -8.348  | -0.664 | 1.00 | 0.00 |
| ATOM | 423 | HG3 PRO | 27 | -4.112 | -10.076 | -0.326 | 1.00 | 0.00 |
| ATOM | 424 | CB PRO  | 27 | -4.508 | -9.502  | -2.346 | 1.00 | 0.00 |
| ATOM | 425 | HB2 PRO | 27 | -5.382 | -8.853  | -2.316 | 1.00 | 0.00 |
| ATOM | 426 | HB3 PRO | 27 | -4.821 | -10.523 | -2.568 | 1.00 | 0.00 |
| ATOM | 427 | CA PRO  | 27 | -3.534 | -9.012  | -3.416 | 1.00 | 0.00 |
| ATOM | 428 | HA PRO  | 27 | -3.578 | -9.600  | -4.333 | 1.00 | 0.00 |
| ATOM | 429 | C PRO   | 27 | -3.795 | -7.538  | -3.742 | 1.00 | 0.00 |
| ATOM | 430 | O PRO   | 27 | -4.342 | -7.211  | -4.777 | 1.00 | 0.00 |
| ATOM | 431 | N CYX   | 28 | -3.399 | -6.645  | -2.877 | 1.00 | 0.00 |
| ATOM | 432 | H CYX   | 28 | -2.937 | -6.903  | -2.016 | 1.00 | 0.00 |
| ATOM | 433 | CA CYX  | 28 | -3.620 | -5.198  | -3.155 | 1.00 | 0.00 |
| ATOM | 434 | HA CYX  | 28 | -4.674 | -5.009  | -3.355 | 1.00 | 0.00 |
| ATOM | 435 | CB CYX  | 28 | -3.197 | -4.372  | -1.938 | 1.00 | 0.00 |
| ATOM | 436 | HB2 CYX | 28 | -2.536 | -4.967  | -1.307 | 1.00 | 0.00 |
| ATOM | 437 | HB3 CYX | 28 | -2.672 | -3.477  | -2.271 | 1.00 | 0.00 |
| ATOM | 438 | SG CYX  | 28 | -4.657 | -3.968  | -0.947 | 1.00 | 0.00 |
| ATOM | 439 | C CYX   | 28 | -2.774 | -4.800  | -4.365 | 1.00 | 0.00 |
| ATOM | 440 | O CYX   | 28 | -3.278 | -4.315  | -5.363 | 1.00 | 0.00 |

|      |     |     |     |    |        |        |        |      |      |
|------|-----|-----|-----|----|--------|--------|--------|------|------|
| ATOM | 441 | N   | GLU | 29 | -1.488 | -5.012 | -4.292 | 1.00 | 0.00 |
| ATOM | 442 | H   | GLU | 29 | -1.061 | -5.418 | -3.471 | 1.00 | 0.00 |
| ATOM | 443 | CA  | GLU | 29 | -0.613 | -4.661 | -5.440 | 1.00 | 0.00 |
| ATOM | 444 | HA  | GLU | 29 | -0.561 | -3.579 | -5.557 | 1.00 | 0.00 |
| ATOM | 445 | CB  | GLU | 29 | 0.798  | -5.194 | -5.192 | 1.00 | 0.00 |
| ATOM | 446 | HB2 | GLU | 29 | 1.037  | -5.112 | -4.132 | 1.00 | 0.00 |
| ATOM | 447 | HB3 | GLU | 29 | 0.851  | -6.240 | -5.496 | 1.00 | 0.00 |
| ATOM | 448 | CG  | GLU | 29 | 1.802  | -4.377 | -6.005 | 1.00 | 0.00 |
| ATOM | 449 | HG2 | GLU | 29 | 1.528  | -4.409 | -7.060 | 1.00 | 0.00 |
| ATOM | 450 | HG3 | GLU | 29 | 1.793  | -3.344 | -5.659 | 1.00 | 0.00 |
| ATOM | 451 | CD  | GLU | 29 | 3.204  | -4.962 | -5.825 | 1.00 | 0.00 |
| ATOM | 452 | OE1 | GLU | 29 | 3.335  | -5.912 | -5.069 | 1.00 | 0.00 |
| ATOM | 453 | OE2 | GLU | 29 | 4.122  | -4.453 | -6.445 | 1.00 | 0.00 |
| ATOM | 454 | C   | GLU | 29 | -1.182 | -5.299 | -6.707 | 1.00 | 0.00 |
| ATOM | 455 | O   | GLU | 29 | -1.090 | -4.753 | -7.789 | 1.00 | 0.00 |
| ATOM | 456 | N   | GLN | 30 | -1.766 | -6.459 | -6.582 | 1.00 | 0.00 |
| ATOM | 457 | H   | GLN | 30 | -1.840 | -6.922 | -5.687 | 1.00 | 0.00 |
| ATOM | 458 | CA  | GLN | 30 | -2.338 | -7.137 | -7.776 | 1.00 | 0.00 |
| ATOM | 459 | HA  | GLN | 30 | -1.605 | -7.164 | -8.583 | 1.00 | 0.00 |
| ATOM | 460 | CB  | GLN | 30 | -2.718 | -8.574 | -7.414 | 1.00 | 0.00 |
| ATOM | 461 | HB2 | GLN | 30 | -3.137 | -8.598 | -6.408 | 1.00 | 0.00 |
| ATOM | 462 | HB3 | GLN | 30 | -3.457 | -8.945 | -8.124 | 1.00 | 0.00 |

|      |     |      |     |    |        |         |        |      |      |
|------|-----|------|-----|----|--------|---------|--------|------|------|
| ATOM | 463 | CG   | GLN | 30 | -1.470 | -9.460  | -7.467 | 1.00 | 0.00 |
| ATOM | 464 | HG2  | GLN | 30 | -1.150 | -9.600  | -8.500 | 1.00 | 0.00 |
| ATOM | 465 | HG3  | GLN | 30 | -0.659 | -9.009  | -6.895 | 1.00 | 0.00 |
| ATOM | 466 | CD   | GLN | 30 | -1.790 | -10.828 | -6.865 | 1.00 | 0.00 |
| ATOM | 467 | OE1  | GLN | 30 | -2.887 | -11.058 | -6.395 | 1.00 | 0.00 |
| ATOM | 468 | NE2  | GLN | 30 | -0.871 | -11.755 | -6.857 | 1.00 | 0.00 |
| ATOM | 469 | HE21 | GLN | 30 | -1.075 | -12.662 | -6.461 | 1.00 | 0.00 |
| ATOM | 470 | HE22 | GLN | 30 | 0.041  | -11.562 | -7.247 | 1.00 | 0.00 |
| ATOM | 471 | C    | GLN | 30 | -3.582 | -6.382  | -8.251 | 1.00 | 0.00 |
| ATOM | 472 | O    | GLN | 30 | -3.958 | -6.459  | -9.404 | 1.00 | 0.00 |
| ATOM | 473 | N    | HID | 31 | -4.224 | -5.648  | -7.382 | 1.00 | 0.00 |
| ATOM | 474 | H    | HID | 31 | -3.923 | -5.574  | -6.421 | 1.00 | 0.00 |
| ATOM | 475 | CA   | HID | 31 | -5.434 | -4.892  | -7.803 | 1.00 | 0.00 |
| ATOM | 476 | HA   | HID | 31 | -6.047 | -5.500  | -8.468 | 1.00 | 0.00 |
| ATOM | 477 | CB   | HID | 31 | -6.264 | -4.529  | -6.567 | 1.00 | 0.00 |
| ATOM | 478 | HB2  | HID | 31 | -6.937 | -5.337  | -6.280 | 1.00 | 0.00 |
| ATOM | 479 | HB3  | HID | 31 | -5.639 | -4.259  | -5.716 | 1.00 | 0.00 |
| ATOM | 480 | CG   | HID | 31 | -7.128 | -3.332  | -6.864 | 1.00 | 0.00 |
| ATOM | 481 | ND1  | HID | 31 | -8.199 | -3.392  | -7.742 | 1.00 | 0.00 |
| ATOM | 482 | HD1  | HID | 31 | -8.506 | -4.204  | -8.259 | 1.00 | 0.00 |
| ATOM | 483 | CE1  | HID | 31 | -8.759 | -2.169  | -7.783 | 1.00 | 0.00 |
| ATOM | 484 | HE1  | HID | 31 | -9.624 | -2.039  | -8.434 | 1.00 | 0.00 |



|      |     |      |     |    |        |        |        |      |      |
|------|-----|------|-----|----|--------|--------|--------|------|------|
| ATOM | 485 | NE2  | HID | 31 | -8.124 | -1.306 | -6.985 | 1.00 | 0.00 |
| ATOM | 486 | CD2  | HID | 31 | -7.093 | -2.038 | -6.403 | 1.00 | 0.00 |
| ATOM | 487 | HD2  | HID | 31 | -6.414 | -1.558 | -5.698 | 1.00 | 0.00 |
| ATOM | 488 | C    | HID | 31 | -4.981 | -3.624 | -8.518 | 1.00 | 0.00 |
| ATOM | 489 | O    | HID | 31 | -5.714 | -3.026 | -9.281 | 1.00 | 0.00 |
| ATOM | 490 | N    | ILE | 32 | -3.767 | -3.216 | -8.277 | 1.00 | 0.00 |
| ATOM | 491 | H    | ILE | 32 | -3.157 | -3.710 | -7.641 | 1.00 | 0.00 |
| ATOM | 492 | CA   | ILE | 32 | -3.248 | -1.990 | -8.943 | 1.00 | 0.00 |
| ATOM | 493 | HA   | ILE | 32 | -4.084 | -1.335 | -9.187 | 1.00 | 0.00 |
| ATOM | 494 | CB   | ILE | 32 | -2.278 | -1.256 | -8.011 | 1.00 | 0.00 |
| ATOM | 495 | HB   | ILE | 32 | -1.315 | -1.134 | -8.507 | 1.00 | 0.00 |
| ATOM | 496 | CG2  | ILE | 32 | -2.851 | 0.116  | -7.669 | 1.00 | 0.00 |
| ATOM | 497 | HG21 | ILE | 32 | -3.813 | -0.006 | -7.172 | 1.00 | 0.00 |
| ATOM | 498 | HG22 | ILE | 32 | -2.164 | 0.642  | -7.006 | 1.00 | 0.00 |
| ATOM | 499 | HG23 | ILE | 32 | -2.985 | 0.692  | -8.584 | 1.00 | 0.00 |
| ATOM | 500 | CG1  | ILE | 32 | -2.083 | -2.059 | -6.721 | 1.00 | 0.00 |
| ATOM | 501 | HG12 | ILE | 32 | -3.056 | -2.302 | -6.295 | 1.00 | 0.00 |
| ATOM | 502 | HG13 | ILE | 32 | -1.545 | -2.981 | -6.946 | 1.00 | 0.00 |
| ATOM | 503 | CD1  | ILE | 32 | -1.279 | -1.232 | -5.716 | 1.00 | 0.00 |
| ATOM | 504 | HD11 | ILE | 32 | -1.816 | -0.311 | -5.490 | 1.00 | 0.00 |
| ATOM | 505 | HD12 | ILE | 32 | -1.142 | -1.806 | -4.800 | 1.00 | 0.00 |
| ATOM | 506 | HD13 | ILE | 32 | -0.305 | -0.990 | -6.141 | 1.00 | 0.00 |

|      |     |     |     |    |        |        |         |      |      |
|------|-----|-----|-----|----|--------|--------|---------|------|------|
| ATOM | 507 | C   | ILE | 32 | -2.520 | -2.384 | -10.227 | 1.00 | 0.00 |
| ATOM | 508 | O   | ILE | 32 | -2.793 | -1.863 | -11.290 | 1.00 | 0.00 |
| ATOM | 509 | N   | MET | 33 | -1.601 | -3.305 | -10.141 | 1.00 | 0.00 |
| ATOM | 510 | H   | MET | 33 | -1.368 | -3.745 | -9.262  | 1.00 | 0.00 |
| ATOM | 511 | CA  | MET | 33 | -0.864 | -3.734 | -11.362 | 1.00 | 0.00 |
| ATOM | 512 | HA  | MET | 33 | -0.352 | -2.884 | -11.813 | 1.00 | 0.00 |
| ATOM | 513 | CB  | MET | 33 | 0.179  | -4.788 | -10.984 | 1.00 | 0.00 |
| ATOM | 514 | HB2 | MET | 33 | -0.325 | -5.687 | -10.628 | 1.00 | 0.00 |
| ATOM | 515 | HB3 | MET | 33 | 0.782  | -5.033 | -11.858 | 1.00 | 0.00 |
| ATOM | 516 | CG  | MET | 33 | 1.083  | -4.239 | -9.879  | 1.00 | 0.00 |
| ATOM | 517 | HG2 | MET | 33 | 1.483  | -3.270 | -10.177 | 1.00 | 0.00 |
| ATOM | 518 | HG3 | MET | 33 | 0.512  | -4.128 | -8.957  | 1.00 | 0.00 |
| ATOM | 519 | SD  | MET | 33 | 2.454  | -5.386 | -9.595  | 1.00 | 0.00 |
| ATOM | 520 | CE  | MET | 33 | 3.585  | -4.694 | -10.826 | 1.00 | 0.00 |
| ATOM | 521 | HE1 | MET | 33 | 3.794  | -3.652 | -10.584 | 1.00 | 0.00 |
| ATOM | 522 | HE2 | MET | 33 | 4.517  | -5.261 | -10.823 | 1.00 | 0.00 |
| ATOM | 523 | HE3 | MET | 33 | 3.128  | -4.753 | -11.814 | 1.00 | 0.00 |
| ATOM | 524 | C   | MET | 33 | -1.854 | -4.329 | -12.363 | 1.00 | 0.00 |
| ATOM | 525 | O   | MET | 33 | -1.760 | -4.105 | -13.552 | 1.00 | 0.00 |
| ATOM | 526 | N   | GLN | 34 | -2.804 | -5.085 | -11.888 | 1.00 | 0.00 |
| ATOM | 527 | H   | GLN | 34 | -2.887 | -5.273 | -10.899 | 1.00 | 0.00 |
| ATOM | 528 | CA  | GLN | 34 | -3.802 | -5.698 | -12.810 | 1.00 | 0.00 |

|      |     |      |     |    |        |         |         |      |      |
|------|-----|------|-----|----|--------|---------|---------|------|------|
| ATOM | 529 | HA   | GLN | 34 | -3.298 | -6.296  | -13.570 | 1.00 | 0.00 |
| ATOM | 530 | CB   | GLN | 34 | -4.739 | -6.608  | -12.013 | 1.00 | 0.00 |
| ATOM | 531 | HB2  | GLN | 34 | -5.091 | -6.081  | -11.127 | 1.00 | 0.00 |
| ATOM | 532 | HB3  | GLN | 34 | -5.591 | -6.885  | -12.633 | 1.00 | 0.00 |
| ATOM | 533 | CG   | GLN | 34 | -3.986 | -7.870  | -11.589 | 1.00 | 0.00 |
| ATOM | 534 | HG2  | GLN | 34 | -3.705 | -8.456  | -12.464 | 1.00 | 0.00 |
| ATOM | 535 | HG3  | GLN | 34 | -3.090 | -7.605  | -11.027 | 1.00 | 0.00 |
| ATOM | 536 | CD   | GLN | 34 | -4.887 | -8.726  | -10.697 | 1.00 | 0.00 |
| ATOM | 537 | OE1  | GLN | 34 | -5.942 | -8.290  | -10.282 | 1.00 | 0.00 |
| ATOM | 538 | NE2  | GLN | 34 | -4.513 | -9.936  | -10.383 | 1.00 | 0.00 |
| ATOM | 539 | HE21 | GLN | 34 | -5.103 | -10.507 | -9.795  | 1.00 | 0.00 |
| ATOM | 540 | HE22 | GLN | 34 | -3.635 | -10.297 | -10.730 | 1.00 | 0.00 |
| ATOM | 541 | C    | GLN | 34 | -4.619 | -4.599  | -13.492 | 1.00 | 0.00 |
| ATOM | 542 | O    | GLN | 34 | -4.854 | -4.640  | -14.683 | 1.00 | 0.00 |
| ATOM | 543 | N    | ARG | 35 | -5.062 | -3.621  | -12.750 | 1.00 | 0.00 |
| ATOM | 544 | H    | ARG | 35 | -4.874 | -3.579  | -11.759 | 1.00 | 0.00 |
| ATOM | 545 | CA   | ARG | 35 | -5.871 | -2.529  | -13.364 | 1.00 | 0.00 |
| ATOM | 546 | HA   | ARG | 35 | -6.733 | -2.944  | -13.885 | 1.00 | 0.00 |
| ATOM | 547 | CB   | ARG | 35 | -6.369 | -1.588  | -12.267 | 1.00 | 0.00 |
| ATOM | 548 | HB2  | ARG | 35 | -5.588 | -1.456  | -11.518 | 1.00 | 0.00 |
| ATOM | 549 | HB3  | ARG | 35 | -6.620 | -0.622  | -12.703 | 1.00 | 0.00 |
| ATOM | 550 | CG   | ARG | 35 | -7.613 | -2.189  | -11.606 | 1.00 | 0.00 |

|      |     |          |    |        |        |         |      |      |
|------|-----|----------|----|--------|--------|---------|------|------|
| ATOM | 551 | HG2 ARG  | 35 | -8.317 | -2.507 | -12.376 | 1.00 | 0.00 |
| ATOM | 552 | HG3 ARG  | 35 | -7.324 | -3.049 | -11.002 | 1.00 | 0.00 |
| ATOM | 553 | CD ARG   | 35 | -8.274 | -1.137 | -10.713 | 1.00 | 0.00 |
| ATOM | 554 | HD2 ARG  | 35 | -8.684 | -0.331 | -11.320 | 1.00 | 0.00 |
| ATOM | 555 | HD3 ARG  | 35 | -9.071 | -1.590 | -10.124 | 1.00 | 0.00 |
| ATOM | 556 | NE ARG   | 35 | -7.259 | -0.566 | -9.784  | 1.00 | 0.00 |
| ATOM | 557 | HE ARG   | 35 | -6.411 | -1.066 | -9.557  | 1.00 | 0.00 |
| ATOM | 558 | CZ ARG   | 35 | -7.456 | 0.604  | -9.241  | 1.00 | 0.00 |
| ATOM | 559 | NH1 ARG  | 35 | -7.971 | 1.573  | -9.948  | 1.00 | 0.00 |
| ATOM | 560 | HH11 ARG | 35 | -8.216 | 1.413  | -10.915 | 1.00 | 0.00 |
| ATOM | 561 | HH12 ARG | 35 | -8.122 | 2.477  | -9.525  | 1.00 | 0.00 |
| ATOM | 562 | NH2 ARG  | 35 | -7.136 | 0.806  | -7.993  | 1.00 | 0.00 |
| ATOM | 563 | HH21 ARG | 35 | -6.736 | 0.054  | -7.450  | 1.00 | 0.00 |
| ATOM | 564 | HH22 ARG | 35 | -7.290 | 1.712  | -7.576  | 1.00 | 0.00 |
| ATOM | 565 | C ARG    | 35 | -5.013 | -1.742 | -14.358 | 1.00 | 0.00 |
| ATOM | 566 | O ARG    | 35 | -5.371 | -1.580 | -15.507 | 1.00 | 0.00 |
| ATOM | 567 | N ILE    | 36 | -3.888 | -1.247 | -13.924 | 1.00 | 0.00 |
| ATOM | 568 | H ILE    | 36 | -3.585 | -1.375 | -12.969 | 1.00 | 0.00 |
| ATOM | 569 | CA ILE   | 36 | -3.014 | -0.465 | -14.844 | 1.00 | 0.00 |
| ATOM | 570 | HA ILE   | 36 | -3.588 | 0.341  | -15.300 | 1.00 | 0.00 |
| ATOM | 571 | CB ILE   | 36 | -1.846 | 0.126  | -14.052 | 1.00 | 0.00 |
| ATOM | 572 | HB ILE   | 36 | -1.212 | 0.710  | -14.719 | 1.00 | 0.00 |

|      |     |          |    |        |        |         |      |      |
|------|-----|----------|----|--------|--------|---------|------|------|
| ATOM | 573 | CG2 ILE  | 36 | -2.390 | 1.030  | -12.943 | 1.00 | 0.00 |
| ATOM | 574 | HG21 ILE | 36 | -3.023 | 0.446  | -12.276 | 1.00 | 0.00 |
| ATOM | 575 | HG22 ILE | 36 | -1.559 | 1.452  | -12.377 | 1.00 | 0.00 |
| ATOM | 576 | HG23 ILE | 36 | -2.975 | 1.836  | -13.385 | 1.00 | 0.00 |
| ATOM | 577 | CG1 ILE  | 36 | -1.023 | -1.008 | -13.435 | 1.00 | 0.00 |
| ATOM | 578 | HG12 ILE | 36 | -1.695 | -1.766 | -13.033 | 1.00 | 0.00 |
| ATOM | 579 | HG13 ILE | 36 | -0.389 | -1.455 | -14.202 | 1.00 | 0.00 |
| ATOM | 580 | CD1 ILE  | 36 | -0.147 | -0.454 | -12.309 | 1.00 | 0.00 |
| ATOM | 581 | HD11 ILE | 36 | -0.779 | -0.008 | -11.542 | 1.00 | 0.00 |
| ATOM | 582 | HD12 ILE | 36 | 0.438  | -1.263 | -11.871 | 1.00 | 0.00 |
| ATOM | 583 | HD13 ILE | 36 | 0.526  | 0.303  | -12.711 | 1.00 | 0.00 |
| ATOM | 584 | C ILE    | 36 | -2.473 | -1.375 | -15.949 | 1.00 | 0.00 |
| ATOM | 585 | O ILE    | 36 | -1.958 | -0.913 | -16.947 | 1.00 | 0.00 |
| ATOM | 586 | N MET    | 37 | -2.585 | -2.665 | -15.783 | 1.00 | 0.00 |
| ATOM | 587 | H MET    | 37 | -3.009 | -3.063 | -14.957 | 1.00 | 0.00 |
| ATOM | 588 | CA MET   | 37 | -2.073 | -3.594 | -16.832 | 1.00 | 0.00 |
| ATOM | 589 | HA MET   | 37 | -1.422 | -3.060 | -17.524 | 1.00 | 0.00 |
| ATOM | 590 | CB MET   | 37 | -1.270 | -4.718 | -16.175 | 1.00 | 0.00 |
| ATOM | 591 | HB2 MET  | 37 | -1.837 | -5.132 | -15.341 | 1.00 | 0.00 |
| ATOM | 592 | HB3 MET  | 37 | -1.075 | -5.503 | -16.907 | 1.00 | 0.00 |
| ATOM | 593 | CG MET   | 37 | 0.059  | -4.160 | -15.660 | 1.00 | 0.00 |
| ATOM | 594 | HG2 MET  | 37 | 0.475  | -3.466 | -16.390 | 1.00 | 0.00 |

|      |     |         |    |        |        |         |      |      |
|------|-----|---------|----|--------|--------|---------|------|------|
| ATOM | 595 | HG3 MET | 37 | -0.100 | -3.641 | -14.715 | 1.00 | 0.00 |
| ATOM | 596 | SD MET  | 37 | 1.224  | -5.520 | -15.401 | 1.00 | 0.00 |
| ATOM | 597 | CE MET  | 37 | 0.229  | -6.449 | -14.209 | 1.00 | 0.00 |
| ATOM | 598 | HE1 MET | 37 | -0.718 | -6.732 | -14.668 | 1.00 | 0.00 |
| ATOM | 599 | HE2 MET | 37 | 0.768  | -7.348 | -13.907 | 1.00 | 0.00 |
| ATOM | 600 | HE3 MET | 37 | 0.038  | -5.829 | -13.333 | 1.00 | 0.00 |
| ATOM | 601 | C MET   | 37 | -3.251 | -4.190 | -17.604 | 1.00 | 0.00 |
| ATOM | 602 | O MET   | 37 | -3.100 | -4.670 | -18.711 | 1.00 | 0.00 |
| ATOM | 603 | N GLY   | 38 | -4.424 | -4.165 | -17.033 | 1.00 | 0.00 |
| ATOM | 604 | H GLY   | 38 | -4.558 | -3.769 | -16.114 | 1.00 | 0.00 |
| ATOM | 605 | CA GLY  | 38 | -5.608 | -4.731 | -17.738 | 1.00 | 0.00 |
| ATOM | 606 | HA2 GLY | 38 | -5.399 | -5.752 | -18.060 | 1.00 | 0.00 |
| ATOM | 607 | HA3 GLY | 38 | -6.473 | -4.730 | -17.076 | 1.00 | 0.00 |
| ATOM | 608 | C GLY   | 38 | -5.920 | -3.875 | -18.968 | 1.00 | 0.00 |
| ATOM | 609 | O GLY   | 38 | -6.499 | -4.341 | -19.930 | 1.00 | 0.00 |
| ATOM | 610 | N GLU   | 39 | -5.541 | -2.627 | -18.943 | 1.00 | 0.00 |
| ATOM | 611 | H GLU   | 39 | -5.061 | -2.234 | -18.146 | 1.00 | 0.00 |
| ATOM | 612 | CA GLU  | 39 | -5.815 | -1.742 | -20.110 | 1.00 | 0.00 |
| ATOM | 613 | HA GLU  | 39 | -6.883 | -1.724 | -20.328 | 1.00 | 0.00 |
| ATOM | 614 | CB GLU  | 39 | -5.356 | -0.318 | -19.790 | 1.00 | 0.00 |
| ATOM | 615 | HB2 GLU | 39 | -5.817 | 0.012  | -18.859 | 1.00 | 0.00 |
| ATOM | 616 | HB3 GLU | 39 | -4.271 | -0.301 | -19.684 | 1.00 | 0.00 |

|      |     |      |     |    |        |        |         |      |      |
|------|-----|------|-----|----|--------|--------|---------|------|------|
| ATOM | 617 | CG   | GLU | 39 | -5.772 | 0.619  | -20.925 | 1.00 | 0.00 |
| ATOM | 618 | HG2  | GLU | 39 | -5.395 | 0.232  | -21.872 | 1.00 | 0.00 |
| ATOM | 619 | HG3  | GLU | 39 | -6.859 | 0.681  | -20.965 | 1.00 | 0.00 |
| ATOM | 620 | CD   | GLU | 39 | -5.191 | 2.012  | -20.676 | 1.00 | 0.00 |
| ATOM | 621 | OE1  | GLU | 39 | -4.480 | 2.169  | -19.696 | 1.00 | 0.00 |
| ATOM | 622 | OE2  | GLU | 39 | -5.466 | 2.898  | -21.468 | 1.00 | 0.00 |
| ATOM | 623 | C    | GLU | 39 | -5.057 | -2.261 | -21.333 | 1.00 | 0.00 |
| ATOM | 624 | O    | GLU | 39 | -5.441 | -2.022 | -22.461 | 1.00 | 0.00 |
| ATOM | 625 | N    | GLN | 40 | -3.981 | -2.968 | -21.120 | 1.00 | 0.00 |
| ATOM | 626 | H    | GLN | 40 | -3.653 | -3.170 | -20.186 | 1.00 | 0.00 |
| ATOM | 627 | CA   | GLN | 40 | -3.201 | -3.501 | -22.272 | 1.00 | 0.00 |
| ATOM | 628 | HA   | GLN | 40 | -2.927 | -2.693 | -22.950 | 1.00 | 0.00 |
| ATOM | 629 | CB   | GLN | 40 | -1.921 | -4.164 | -21.759 | 1.00 | 0.00 |
| ATOM | 630 | HB2  | GLN | 40 | -2.170 | -4.874 | -20.970 | 1.00 | 0.00 |
| ATOM | 631 | HB3  | GLN | 40 | -1.430 | -4.691 | -22.578 | 1.00 | 0.00 |
| ATOM | 632 | CG   | GLN | 40 | -0.979 | -3.094 | -21.204 | 1.00 | 0.00 |
| ATOM | 633 | HG2  | GLN | 40 | -0.722 | -2.375 | -21.982 | 1.00 | 0.00 |
| ATOM | 634 | HG3  | GLN | 40 | -1.449 | -2.574 | -20.370 | 1.00 | 0.00 |
| ATOM | 635 | CD   | GLN | 40 | 0.307  | -3.755 | -20.705 | 1.00 | 0.00 |
| ATOM | 636 | OE1  | GLN | 40 | 0.369  | -4.961 | -20.566 | 1.00 | 0.00 |
| ATOM | 637 | NE2  | GLN | 40 | 1.345  | -3.013 | -20.429 | 1.00 | 0.00 |
| ATOM | 638 | HE21 | GLN | 40 | 2.197  | -3.445 | -20.099 | 1.00 | 0.00 |

|      |     |      |     |    |        |        |         |      |      |
|------|-----|------|-----|----|--------|--------|---------|------|------|
| ATOM | 639 | HE22 | GLN | 40 | 1.292  | -2.012 | -20.547 | 1.00 | 0.00 |
| ATOM | 640 | C    | GLN | 40 | -4.045 | -4.532 | -23.023 | 1.00 | 0.00 |
| ATOM | 641 | O    | GLN | 40 | -3.942 | -4.677 | -24.224 | 1.00 | 0.00 |
| ATOM | 642 | N    | GLU | 41 | -4.880 | -5.250 | -22.322 | 1.00 | 0.00 |
| ATOM | 643 | H    | GLU | 41 | -4.969 | -5.138 | -21.322 | 1.00 | 0.00 |
| ATOM | 644 | CA   | GLU | 41 | -5.732 | -6.270 | -22.997 | 1.00 | 0.00 |
| ATOM | 645 | HA   | GLU | 41 | -5.110 | -7.041 | -23.453 | 1.00 | 0.00 |
| ATOM | 646 | CB   | GLU | 41 | -6.651 | -6.929 | -21.966 | 1.00 | 0.00 |
| ATOM | 647 | HB2  | GLU | 41 | -7.262 | -6.167 | -21.484 | 1.00 | 0.00 |
| ATOM | 648 | HB3  | GLU | 41 | -7.298 | -7.651 | -22.465 | 1.00 | 0.00 |
| ATOM | 649 | CG   | GLU | 41 | -5.805 | -7.646 | -20.912 | 1.00 | 0.00 |
| ATOM | 650 | HG2  | GLU | 41 | -5.171 | -8.389 | -21.397 | 1.00 | 0.00 |
| ATOM | 651 | HG3  | GLU | 41 | -5.180 | -6.920 | -20.392 | 1.00 | 0.00 |
| ATOM | 652 | CD   | GLU | 41 | -6.725 | -8.340 | -19.906 | 1.00 | 0.00 |
| ATOM | 653 | OE1  | GLU | 41 | -7.920 | -8.107 | -19.968 | 1.00 | 0.00 |
| ATOM | 654 | OE2  | GLU | 41 | -6.218 | -9.093 | -19.092 | 1.00 | 0.00 |
| ATOM | 655 | C    | GLU | 41 | -6.577 | -5.593 | -24.078 | 1.00 | 0.00 |
| ATOM | 656 | O    | GLU | 41 | -7.080 | -4.504 | -23.892 | 1.00 | 0.00 |
| ATOM | 657 | N    | GLN | 42 | -6.737 | -6.231 | -25.205 | 1.00 | 0.00 |
| ATOM | 658 | H    | GLN | 42 | -6.320 | -7.137 | -25.368 | 1.00 | 0.00 |
| ATOM | 659 | CA   | GLN | 42 | -7.550 | -5.622 | -26.294 | 1.00 | 0.00 |
| ATOM | 660 | HA   | GLN | 42 | -7.150 | -4.645 | -26.564 | 1.00 | 0.00 |



|      |     |      |     |    |         |        |         |      |      |
|------|-----|------|-----|----|---------|--------|---------|------|------|
| ATOM | 661 | CB   | GLN | 42 | -7.507  | -6.526 | -27.528 | 1.00 | 0.00 |
| ATOM | 662 | HB2  | GLN | 42 | -7.852  | -7.525 | -27.260 | 1.00 | 0.00 |
| ATOM | 663 | HB3  | GLN | 42 | -8.153  | -6.115 | -28.303 | 1.00 | 0.00 |
| ATOM | 664 | CG   | GLN | 42 | -6.072  | -6.606 | -28.051 | 1.00 | 0.00 |
| ATOM | 665 | HG2  | GLN | 42 | -5.418  | -7.048 | -27.299 | 1.00 | 0.00 |
| ATOM | 666 | HG3  | GLN | 42 | -6.034  | -7.205 | -28.961 | 1.00 | 0.00 |
| ATOM | 667 | CD   | GLN | 42 | -5.567  | -5.197 | -28.371 | 1.00 | 0.00 |
| ATOM | 668 | OE1  | GLN | 42 | -6.218  | -4.450 | -29.073 | 1.00 | 0.00 |
| ATOM | 669 | NE2  | GLN | 42 | -4.425  | -4.800 | -27.881 | 1.00 | 0.00 |
| ATOM | 670 | HE21 | GLN | 42 | -4.085  | -3.872 | -28.088 | 1.00 | 0.00 |
| ATOM | 671 | HE22 | GLN | 42 | -3.885  | -5.423 | -27.297 | 1.00 | 0.00 |
| ATOM | 672 | C    | GLN | 42 | -8.997  | -5.465 | -25.824 | 1.00 | 0.00 |
| ATOM | 673 | O    | GLN | 42 | -9.668  | -4.509 | -26.156 | 1.00 | 0.00 |
| ATOM | 674 | N    | TYR | 43 | -9.484  | -6.398 | -25.051 | 1.00 | 0.00 |
| ATOM | 675 | H    | TYR | 43 | -8.932  | -7.196 | -24.769 | 1.00 | 0.00 |
| ATOM | 676 | CA   | TYR | 43 | -10.888 | -6.301 | -24.560 | 1.00 | 0.00 |
| ATOM | 677 | HA   | TYR | 43 | -11.372 | -5.416 | -24.973 | 1.00 | 0.00 |
| ATOM | 678 | CB   | TYR | 43 | -11.672 | -7.539 | -25.003 | 1.00 | 0.00 |
| ATOM | 679 | HB2  | TYR | 43 | -11.210 | -8.431 | -24.579 | 1.00 | 0.00 |
| ATOM | 680 | HB3  | TYR | 43 | -12.702 | -7.464 | -24.655 | 1.00 | 0.00 |
| ATOM | 681 | CG   | TYR | 43 | -11.656 | -7.632 | -26.510 | 1.00 | 0.00 |
| ATOM | 682 | CD1  | TYR | 43 | -12.531 | -6.845 | -27.269 | 1.00 | 0.00 |

|      |     |     |     |    |         |        |         |      |      |
|------|-----|-----|-----|----|---------|--------|---------|------|------|
| ATOM | 683 | HD1 | TYR | 43 | -13.222 | -6.165 | -26.773 | 1.00 | 0.00 |
| ATOM | 684 | CE1 | TYR | 43 | -12.517 | -6.933 | -28.666 | 1.00 | 0.00 |
| ATOM | 685 | HE1 | TYR | 43 | -13.198 | -6.321 | -29.257 | 1.00 | 0.00 |
| ATOM | 686 | CZ  | TYR | 43 | -11.630 | -7.808 | -29.304 | 1.00 | 0.00 |
| ATOM | 687 | OH  | TYR | 43 | -11.617 | -7.894 | -30.682 | 1.00 | 0.00 |
| ATOM | 688 | HH  | TYR | 43 | -12.255 | -7.312 | -31.100 | 1.00 | 0.00 |
| ATOM | 689 | CE2 | TYR | 43 | -10.755 | -8.594 | -28.545 | 1.00 | 0.00 |
| ATOM | 690 | HE2 | TYR | 43 | -10.063 | -9.275 | -29.041 | 1.00 | 0.00 |
| ATOM | 691 | CD2 | TYR | 43 | -10.769 | -8.506 | -27.149 | 1.00 | 0.00 |
| ATOM | 692 | HD2 | TYR | 43 | -10.088 | -9.119 | -26.558 | 1.00 | 0.00 |
| ATOM | 693 | C   | TYR | 43 | -10.888 | -6.220 | -23.032 | 1.00 | 0.00 |
| ATOM | 694 | O   | TYR | 43 | -9.941  | -6.612 | -22.380 | 1.00 | 0.00 |
| ATOM | 695 | N   | ASP | 44 | -11.944 | -5.714 | -22.456 | 1.00 | 0.00 |
| ATOM | 696 | H   | ASP | 44 | -12.735 | -5.387 | -22.991 | 1.00 | 0.00 |
| ATOM | 697 | CA  | ASP | 44 | -12.003 | -5.608 | -20.971 | 1.00 | 0.00 |
| ATOM | 698 | HA  | ASP | 44 | -12.009 | -6.601 | -20.522 | 1.00 | 0.00 |
| ATOM | 699 | CB  | ASP | 44 | -10.775 | -4.849 | -20.462 | 1.00 | 0.00 |
| ATOM | 700 | HB2 | ASP | 44 | -10.900 | -4.625 | -19.403 | 1.00 | 0.00 |
| ATOM | 701 | HB3 | ASP | 44 | -9.884  | -5.462 | -20.600 | 1.00 | 0.00 |
| ATOM | 702 | CG  | ASP | 44 | -10.622 | -3.543 | -21.245 | 1.00 | 0.00 |
| ATOM | 703 | OD1 | ASP | 44 | -11.338 | -3.370 | -22.217 | 1.00 | 0.00 |
| ATOM | 704 | OD2 | ASP | 44 | -9.789  | -2.740 | -20.858 | 1.00 | 0.00 |

|      |     |     |     |    |         |        |         |      |      |
|------|-----|-----|-----|----|---------|--------|---------|------|------|
| ATOM | 705 | C   | ASP | 44 | -13.272 | -4.856 | -20.564 | 1.00 | 0.00 |
| ATOM | 706 | O   | ASP | 44 | -13.979 | -5.253 | -19.660 | 1.00 | 0.00 |
| ATOM | 707 | N   | SER | 45 | -13.567 | -3.770 | -21.226 | 1.00 | 0.00 |
| ATOM | 708 | H   | SER | 45 | -12.984 | -3.432 | -21.978 | 1.00 | 0.00 |
| ATOM | 709 | CA  | SER | 45 | -14.791 | -2.995 | -20.878 | 1.00 | 0.00 |
| ATOM | 710 | HA  | SER | 45 | -14.669 | -2.509 | -19.910 | 1.00 | 0.00 |
| ATOM | 711 | CB  | SER | 45 | -15.030 | -1.919 | -21.939 | 1.00 | 0.00 |
| ATOM | 712 | HB2 | SER | 45 | -15.836 | -1.261 | -21.615 | 1.00 | 0.00 |
| ATOM | 713 | HB3 | SER | 45 | -14.119 | -1.337 | -22.077 | 1.00 | 0.00 |
| ATOM | 714 | OG  | SER | 45 | -15.388 | -2.536 | -23.167 | 1.00 | 0.00 |
| ATOM | 715 | HG  | SER | 45 | -15.538 | -1.861 | -23.833 | 1.00 | 0.00 |
| ATOM | 716 | C   | SER | 45 | -15.994 | -3.937 | -20.826 | 1.00 | 0.00 |
| ATOM | 717 | O   | SER | 45 | -16.892 | -3.770 | -20.025 | 1.00 | 0.00 |
| ATOM | 718 | N   | TYR | 46 | -16.021 | -4.927 | -21.677 | 1.00 | 0.00 |
| ATOM | 719 | H   | TYR | 46 | -15.277 | -5.073 | -22.345 | 1.00 | 0.00 |
| ATOM | 720 | CA  | TYR | 46 | -17.167 | -5.878 | -21.678 | 1.00 | 0.00 |
| ATOM | 721 | HA  | TYR | 46 | -18.100 | -5.346 | -21.864 | 1.00 | 0.00 |
| ATOM | 722 | CB  | TYR | 46 | -16.967 | -6.916 | -22.784 | 1.00 | 0.00 |
| ATOM | 723 | HB2 | TYR | 46 | -16.001 | -7.406 | -22.656 | 1.00 | 0.00 |
| ATOM | 724 | HB3 | TYR | 46 | -17.761 | -7.661 | -22.731 | 1.00 | 0.00 |
| ATOM | 725 | CG  | TYR | 46 | -17.009 | -6.231 | -24.129 | 1.00 | 0.00 |
| ATOM | 726 | CD1 | TYR | 46 | -18.201 | -5.657 | -24.585 | 1.00 | 0.00 |

|      |     |     |     |    |         |         |         |      |      |
|------|-----|-----|-----|----|---------|---------|---------|------|------|
| ATOM | 727 | HD1 | TYR | 46 | -19.099 | -5.706  | -23.969 | 1.00 | 0.00 |
| ATOM | 728 | CE1 | TYR | 46 | -18.241 | -5.021  | -25.832 | 1.00 | 0.00 |
| ATOM | 729 | HE1 | TYR | 46 | -19.169 | -4.575  | -26.187 | 1.00 | 0.00 |
| ATOM | 730 | CZ  | TYR | 46 | -17.087 | -4.958  | -26.622 | 1.00 | 0.00 |
| ATOM | 731 | OH  | TYR | 46 | -17.126 | -4.332  | -27.851 | 1.00 | 0.00 |
| ATOM | 732 | HH  | TYR | 46 | -17.992 | -3.977  | -28.064 | 1.00 | 0.00 |
| ATOM | 733 | CE2 | TYR | 46 | -15.894 | -5.531  | -26.166 | 1.00 | 0.00 |
| ATOM | 734 | HE2 | TYR | 46 | -14.996 | -5.482  | -26.782 | 1.00 | 0.00 |
| ATOM | 735 | CD2 | TYR | 46 | -15.854 | -6.168  | -24.919 | 1.00 | 0.00 |
| ATOM | 736 | HD2 | TYR | 46 | -14.925 | -6.614  | -24.564 | 1.00 | 0.00 |
| ATOM | 737 | C   | TYR | 46 | -17.244 | -6.586  | -20.323 | 1.00 | 0.00 |
| ATOM | 738 | O   | TYR | 46 | -18.309 | -6.765  | -19.766 | 1.00 | 0.00 |
| ATOM | 739 | N   | ASP | 47 | -16.124 | -6.991  | -19.789 | 1.00 | 0.00 |
| ATOM | 740 | H   | ASP | 47 | -15.234 | -6.846  | -20.245 | 1.00 | 0.00 |
| ATOM | 741 | CA  | ASP | 47 | -16.137 | -7.687  | -18.472 | 1.00 | 0.00 |
| ATOM | 742 | HA  | ASP | 47 | -17.148 | -8.011  | -18.225 | 1.00 | 0.00 |
| ATOM | 743 | CB  | ASP | 47 | -15.232 | -8.919  | -18.537 | 1.00 | 0.00 |
| ATOM | 744 | HB2 | ASP | 47 | -14.238 | -8.627  | -18.877 | 1.00 | 0.00 |
| ATOM | 745 | HB3 | ASP | 47 | -15.159 | -9.368  | -17.546 | 1.00 | 0.00 |
| ATOM | 746 | CG  | ASP | 47 | -15.826 | -9.936  | -19.514 | 1.00 | 0.00 |
| ATOM | 747 | OD1 | ASP | 47 | -16.986 | -9.787  | -19.861 | 1.00 | 0.00 |
| ATOM | 748 | OD2 | ASP | 47 | -15.110 | -10.845 | -19.901 | 1.00 | 0.00 |

|      |     |      |     |    |         |        |         |      |      |
|------|-----|------|-----|----|---------|--------|---------|------|------|
| ATOM | 749 | C    | ASP | 47 | -15.625 | -6.737 | -17.387 | 1.00 | 0.00 |
| ATOM | 750 | O    | ASP | 47 | -14.502 | -6.273 | -17.434 | 1.00 | 0.00 |
| ATOM | 751 | N    | ILE | 48 | -16.438 | -6.442 | -16.410 | 1.00 | 0.00 |
| ATOM | 752 | H    | ILE | 48 | -17.372 | -6.824 | -16.363 | 1.00 | 0.00 |
| ATOM | 753 | CA   | ILE | 48 | -15.996 | -5.521 | -15.325 | 1.00 | 0.00 |
| ATOM | 754 | HA   | ILE | 48 | -15.748 | -4.549 | -15.751 | 1.00 | 0.00 |
| ATOM | 755 | CB   | ILE | 48 | -17.124 | -5.358 | -14.304 | 1.00 | 0.00 |
| ATOM | 756 | HB   | ILE | 48 | -17.360 | -6.328 | -13.865 | 1.00 | 0.00 |
| ATOM | 757 | CG2  | ILE | 48 | -16.679 | -4.395 | -13.202 | 1.00 | 0.00 |
| ATOM | 758 | HG21 | ILE | 48 | -16.442 | -3.426 | -13.640 | 1.00 | 0.00 |
| ATOM | 759 | HG22 | ILE | 48 | -17.482 | -4.279 | -12.474 | 1.00 | 0.00 |
| ATOM | 760 | HG23 | ILE | 48 | -15.794 | -4.795 | -12.705 | 1.00 | 0.00 |
| ATOM | 761 | CG1  | ILE | 48 | -18.366 | -4.797 | -15.000 | 1.00 | 0.00 |
| ATOM | 762 | HG12 | ILE | 48 | -18.166 | -3.780 | -15.337 | 1.00 | 0.00 |
| ATOM | 763 | HG13 | ILE | 48 | -18.615 | -5.421 | -15.859 | 1.00 | 0.00 |
| ATOM | 764 | CD1  | ILE | 48 | -19.540 | -4.788 | -14.019 | 1.00 | 0.00 |
| ATOM | 765 | HD11 | ILE | 48 | -19.292 | -4.164 | -13.160 | 1.00 | 0.00 |
| ATOM | 766 | HD12 | ILE | 48 | -20.425 | -4.389 | -14.514 | 1.00 | 0.00 |
| ATOM | 767 | HD13 | ILE | 48 | -19.740 | -5.806 | -13.682 | 1.00 | 0.00 |
| ATOM | 768 | C    | ILE | 48 | -14.763 | -6.105 | -14.634 | 1.00 | 0.00 |
| ATOM | 769 | O    | ILE | 48 | -13.808 | -5.409 | -14.354 | 1.00 | 0.00 |
| ATOM | 770 | N    | ARG | 49 | -14.776 | -7.381 | -14.355 | 1.00 | 0.00 |

|      |     |      |     |    |         |        |         |      |      |
|------|-----|------|-----|----|---------|--------|---------|------|------|
| ATOM | 771 | H    | ARG | 49 | -15.566 | -7.967 | -14.585 | 1.00 | 0.00 |
| ATOM | 772 | CA   | ARG | 49 | -13.605 | -8.008 | -13.682 | 1.00 | 0.00 |
| ATOM | 773 | HA   | ARG | 49 | -12.745 | -7.339 | -13.717 | 1.00 | 0.00 |
| ATOM | 774 | CB   | ARG | 49 | -13.947 | -8.288 | -12.217 | 1.00 | 0.00 |
| ATOM | 775 | HB2  | ARG | 49 | -14.832 | -8.923 | -12.164 | 1.00 | 0.00 |
| ATOM | 776 | HB3  | ARG | 49 | -13.109 | -8.794 | -11.738 | 1.00 | 0.00 |
| ATOM | 777 | CG   | ARG | 49 | -14.224 | -6.966 | -11.497 | 1.00 | 0.00 |
| ATOM | 778 | HG2  | ARG | 49 | -14.982 | -6.406 | -12.044 | 1.00 | 0.00 |
| ATOM | 779 | HG3  | ARG | 49 | -14.580 | -7.170 | -10.487 | 1.00 | 0.00 |
| ATOM | 780 | CD   | ARG | 49 | -12.935 | -6.144 | -11.427 | 1.00 | 0.00 |
| ATOM | 781 | HD2  | ARG | 49 | -12.138 | -6.730 | -10.967 | 1.00 | 0.00 |
| ATOM | 782 | HD3  | ARG | 49 | -12.628 | -5.837 | -12.427 | 1.00 | 0.00 |
| ATOM | 783 | NE   | ARG | 49 | -13.168 | -4.925 | -10.603 | 1.00 | 0.00 |
| ATOM | 784 | HE   | ARG | 49 | -14.079 | -4.711 | -10.224 | 1.00 | 0.00 |
| ATOM | 785 | CZ   | ARG | 49 | -12.183 | -4.106 | -10.356 | 1.00 | 0.00 |
| ATOM | 786 | NH1  | ARG | 49 | -10.953 | -4.477 | -10.584 | 1.00 | 0.00 |
| ATOM | 787 | HH11 | ARG | 49 | -10.767 | -5.399 | -10.952 | 1.00 | 0.00 |
| ATOM | 788 | HH12 | ARG | 49 | -10.193 | -3.841 | -10.392 | 1.00 | 0.00 |
| ATOM | 789 | NH2  | ARG | 49 | -12.428 | -2.915 | -9.881  | 1.00 | 0.00 |
| ATOM | 790 | HH21 | ARG | 49 | -13.381 | -2.631 | -9.706  | 1.00 | 0.00 |
| ATOM | 791 | HH22 | ARG | 49 | -11.663 | -2.284 | -9.691  | 1.00 | 0.00 |
| ATOM | 792 | C    | ARG | 49 | -13.257 | -9.323 | -14.384 | 1.00 | 0.00 |

|      |     |      |     |    |         |         |         |      |      |
|------|-----|------|-----|----|---------|---------|---------|------|------|
| ATOM | 793 | O    | ARG | 49 | -14.124 | -10.041 | -14.841 | 1.00 | 0.00 |
| ATOM | 794 | N    | SER | 50 | -11.995 | -9.642  | -14.475 | 1.00 | 0.00 |
| ATOM | 795 | H    | SER | 50 | -11.269 | -9.050  | -14.099 | 1.00 | 0.00 |
| ATOM | 796 | CA   | SER | 50 | -11.594 | -10.909 | -15.148 | 1.00 | 0.00 |
| ATOM | 797 | HA   | SER | 50 | -11.845 | -10.871 | -16.208 | 1.00 | 0.00 |
| ATOM | 798 | CB   | SER | 50 | -10.082 | -11.102 | -15.010 | 1.00 | 0.00 |
| ATOM | 799 | HB2  | SER | 50 | -9.825  | -11.222 | -13.958 | 1.00 | 0.00 |
| ATOM | 800 | HB3  | SER | 50 | -9.776  | -11.992 | -15.562 | 1.00 | 0.00 |
| ATOM | 801 | OG   | SER | 50 | -9.411  | -9.967  | -15.534 | 1.00 | 0.00 |
| ATOM | 802 | HG   | SER | 50 | -8.462  | -10.088 | -15.448 | 1.00 | 0.00 |
| ATOM | 803 | C    | SER | 50 | -12.321 | -12.087 | -14.495 | 1.00 | 0.00 |
| ATOM | 804 | O    | SER | 50 | -12.763 | -13.002 | -15.162 | 1.00 | 0.00 |
| ATOM | 805 | N    | THR | 51 | -12.448 | -12.072 | -13.197 | 1.00 | 0.00 |
| ATOM | 806 | H    | THR | 51 | -12.083 | -11.316 | -12.637 | 1.00 | 0.00 |
| ATOM | 807 | CA   | THR | 51 | -13.146 | -13.191 | -12.504 | 1.00 | 0.00 |
| ATOM | 808 | HA   | THR | 51 | -13.844 | -13.683 | -13.181 | 1.00 | 0.00 |
| ATOM | 809 | CB   | THR | 51 | -12.117 | -14.220 | -12.032 | 1.00 | 0.00 |
| ATOM | 810 | HB   | THR | 51 | -11.454 | -14.476 | -12.859 | 1.00 | 0.00 |
| ATOM | 811 | CG2  | THR | 51 | -11.296 | -13.635 | -10.883 | 1.00 | 0.00 |
| ATOM | 812 | HG21 | THR | 51 | -11.958 | -13.380 | -10.056 | 1.00 | 0.00 |
| ATOM | 813 | HG22 | THR | 51 | -10.563 | -14.370 | -10.548 | 1.00 | 0.00 |
| ATOM | 814 | HG23 | THR | 51 | -10.780 | -12.738 | -11.225 | 1.00 | 0.00 |

|      |     |          |    |         |         |         |      |      |
|------|-----|----------|----|---------|---------|---------|------|------|
| ATOM | 815 | OG1 THR  | 51 | -12.788 | -15.392 | -11.589 | 1.00 | 0.00 |
| ATOM | 816 | HG1 THR  | 51 | -12.142 | -16.038 | -11.293 | 1.00 | 0.00 |
| ATOM | 817 | C THR    | 51 | -13.912 | -12.646 | -11.297 | 1.00 | 0.00 |
| ATOM | 818 | O THR    | 51 | -13.586 | -11.605 | -10.762 | 1.00 | 0.00 |
| ATOM | 819 | N ARG    | 52 | -14.928 | -13.341 | -10.864 | 1.00 | 0.00 |
| ATOM | 820 | H ARG    | 52 | -15.204 | -14.208 | -11.303 | 1.00 | 0.00 |
| ATOM | 821 | CA ARG   | 52 | -15.714 | -12.861 | -9.692  | 1.00 | 0.00 |
| ATOM | 822 | HA ARG   | 52 | -16.128 | -11.874 | -9.894  | 1.00 | 0.00 |
| ATOM | 823 | CB ARG   | 52 | -16.867 | -13.829 | -9.420  | 1.00 | 0.00 |
| ATOM | 824 | HB2 ARG  | 52 | -16.473 | -14.838 | -9.291  | 1.00 | 0.00 |
| ATOM | 825 | HB3 ARG  | 52 | -17.391 | -13.526 | -8.514  | 1.00 | 0.00 |
| ATOM | 826 | CG ARG   | 52 | -17.838 | -13.809 | -10.602 | 1.00 | 0.00 |
| ATOM | 827 | HG2 ARG  | 52 | -18.154 | -12.784 | -10.796 | 1.00 | 0.00 |
| ATOM | 828 | HG3 ARG  | 52 | -17.343 | -14.211 | -11.487 | 1.00 | 0.00 |
| ATOM | 829 | CD ARG   | 52 | -19.063 | -14.666 | -10.270 | 1.00 | 0.00 |
| ATOM | 830 | HD2 ARG  | 52 | -19.595 | -14.250 | -9.415  | 1.00 | 0.00 |
| ATOM | 831 | HD3 ARG  | 52 | -19.734 | -14.714 | -11.127 | 1.00 | 0.00 |
| ATOM | 832 | NE ARG   | 52 | -18.623 | -16.048 | -9.931  | 1.00 | 0.00 |
| ATOM | 833 | HE ARG   | 52 | -17.706 | -16.233 | -9.550  | 1.00 | 0.00 |
| ATOM | 834 | CZ ARG   | 52 | -19.431 | -17.055 | -10.125 | 1.00 | 0.00 |
| ATOM | 835 | NH1 ARG  | 52 | -19.835 | -17.772 | -9.112  | 1.00 | 0.00 |
| ATOM | 836 | HH11 ARG | 52 | -19.520 | -17.546 | -8.179  | 1.00 | 0.00 |



|      |     |      |     |    |         |         |         |      |      |
|------|-----|------|-----|----|---------|---------|---------|------|------|
| ATOM | 837 | HH12 | ARG | 52 | -20.460 | -18.551 | -9.266  | 1.00 | 0.00 |
| ATOM | 838 | NH2  | ARG | 52 | -19.834 | -17.344 | -11.331 | 1.00 | 0.00 |
| ATOM | 839 | HH21 | ARG | 52 | -19.519 | -16.787 | -12.112 | 1.00 | 0.00 |
| ATOM | 840 | HH22 | ARG | 52 | -20.459 | -18.124 | -11.478 | 1.00 | 0.00 |
| ATOM | 841 | C    | ARG | 52 | -14.807 | -12.792 | -8.462  | 1.00 | 0.00 |
| ATOM | 842 | O    | ARG | 52 | -14.970 | -11.944 | -7.607  | 1.00 | 0.00 |
| ATOM | 843 | N    | SER | 53 | -13.853 | -13.676 | -8.365  | 1.00 | 0.00 |
| ATOM | 844 | H    | SER | 53 | -13.713 | -14.384 | -9.072  | 1.00 | 0.00 |
| ATOM | 845 | CA   | SER | 53 | -12.937 | -13.661 | -7.190  | 1.00 | 0.00 |
| ATOM | 846 | HA   | SER | 53 | -13.500 | -13.814 | -6.270  | 1.00 | 0.00 |
| ATOM | 847 | CB   | SER | 53 | -11.911 | -14.788 | -7.327  | 1.00 | 0.00 |
| ATOM | 848 | HB2  | SER | 53 | -11.351 | -14.887 | -6.397  | 1.00 | 0.00 |
| ATOM | 849 | HB3  | SER | 53 | -12.425 | -15.725 | -7.542  | 1.00 | 0.00 |
| ATOM | 850 | OG   | SER | 53 | -11.016 | -14.486 | -8.388  | 1.00 | 0.00 |
| ATOM | 851 | HG   | SER | 53 | -10.372 | -15.193 | -8.474  | 1.00 | 0.00 |
| ATOM | 852 | C    | SER | 53 | -12.213 | -12.315 | -7.125  | 1.00 | 0.00 |
| ATOM | 853 | O    | SER | 53 | -11.714 | -11.917 | -6.090  | 1.00 | 0.00 |
| ATOM | 854 | N    | SER | 54 | -12.149 | -11.610 | -8.221  | 1.00 | 0.00 |
| ATOM | 855 | H    | SER | 54 | -12.561 | -11.935 | -9.084  | 1.00 | 0.00 |
| ATOM | 856 | CA   | SER | 54 | -11.456 | -10.291 | -8.221  | 1.00 | 0.00 |
| ATOM | 857 | HA   | SER | 54 | -10.389 | -10.425 | -8.041  | 1.00 | 0.00 |
| ATOM | 858 | CB   | SER | 54 | -11.642 | -9.616  | -9.581  | 1.00 | 0.00 |

|      |     |     |     |    |         |         |         |      |      |
|------|-----|-----|-----|----|---------|---------|---------|------|------|
| ATOM | 859 | HB2 | SER | 54 | -11.323 | -10.296 | -10.371 | 1.00 | 0.00 |
| ATOM | 860 | HB3 | SER | 54 | -12.693 | -9.364  | -9.721  | 1.00 | 0.00 |
| ATOM | 861 | OG  | SER | 54 | -10.861 | -8.432  | -9.633  | 1.00 | 0.00 |
| ATOM | 862 | HG  | SER | 54 | -10.978 | -8.009  | -10.487 | 1.00 | 0.00 |
| ATOM | 863 | C   | SER | 54 | -12.050 | -9.403  | -7.126  | 1.00 | 0.00 |
| ATOM | 864 | O   | SER | 54 | -11.367 | -8.592  | -6.533  | 1.00 | 0.00 |
| ATOM | 865 | N   | ASP | 55 | -13.317 | -9.548  | -6.854  | 1.00 | 0.00 |
| ATOM | 866 | H   | ASP | 55 | -13.891 | -10.219 | -7.344  | 1.00 | 0.00 |
| ATOM | 867 | CA  | ASP | 55 | -13.953 | -8.711  | -5.797  | 1.00 | 0.00 |
| ATOM | 868 | HA  | ASP | 55 | -13.851 | -7.654  | -6.040  | 1.00 | 0.00 |
| ATOM | 869 | CB  | ASP | 55 | -15.442 | -9.051  | -5.705  | 1.00 | 0.00 |
| ATOM | 870 | HB2 | ASP | 55 | -15.562 | -10.128 | -5.586  | 1.00 | 0.00 |
| ATOM | 871 | HB3 | ASP | 55 | -15.879 | -8.541  | -4.847  | 1.00 | 0.00 |
| ATOM | 872 | CG  | ASP | 55 | -16.150 | -8.597  | -6.983  | 1.00 | 0.00 |
| ATOM | 873 | OD1 | ASP | 55 | -15.537 | -7.874  | -7.751  | 1.00 | 0.00 |
| ATOM | 874 | OD2 | ASP | 55 | -17.293 | -8.980  | -7.172  | 1.00 | 0.00 |
| ATOM | 875 | C   | ASP | 55 | -13.282 | -8.990  | -4.451  | 1.00 | 0.00 |
| ATOM | 876 | O   | ASP | 55 | -13.280 | -8.160  | -3.564  | 1.00 | 0.00 |
| ATOM | 877 | N   | GLN | 56 | -12.711 | -10.153 | -4.292  | 1.00 | 0.00 |
| ATOM | 878 | H   | GLN | 56 | -12.708 | -10.848 | -5.025  | 1.00 | 0.00 |
| ATOM | 879 | CA  | GLN | 56 | -12.040 | -10.483 | -3.003  | 1.00 | 0.00 |
| ATOM | 880 | HA  | GLN | 56 | -12.742 | -10.387 | -2.175  | 1.00 | 0.00 |

|      |     |      |     |    |         |         |        |      |      |
|------|-----|------|-----|----|---------|---------|--------|------|------|
| ATOM | 881 | CB   | GLN | 56 | -11.532 | -11.925 | -3.048 | 1.00 | 0.00 |
| ATOM | 882 | HB2  | GLN | 56 | -10.814 | -12.033 | -3.862 | 1.00 | 0.00 |
| ATOM | 883 | HB3  | GLN | 56 | -11.047 | -12.170 | -2.103 | 1.00 | 0.00 |
| ATOM | 884 | CG   | GLN | 56 | -12.709 | -12.875 | -3.278 | 1.00 | 0.00 |
| ATOM | 885 | HG2  | GLN | 56 | -13.549 | -12.599 | -2.641 | 1.00 | 0.00 |
| ATOM | 886 | HG3  | GLN | 56 | -13.020 | -12.845 | -4.322 | 1.00 | 0.00 |
| ATOM | 887 | CD   | GLN | 56 | -12.285 | -14.305 | -2.936 | 1.00 | 0.00 |
| ATOM | 888 | OE1  | GLN | 56 | -13.068 | -15.076 | -2.419 | 1.00 | 0.00 |
| ATOM | 889 | NE2  | GLN | 56 | -11.069 | -14.694 | -3.206 | 1.00 | 0.00 |
| ATOM | 890 | HE21 | GLN | 56 | -10.782 | -15.637 | -2.983 | 1.00 | 0.00 |
| ATOM | 891 | HE22 | GLN | 56 | -10.420 | -14.051 | -3.637 | 1.00 | 0.00 |
| ATOM | 892 | C    | GLN | 56 | -10.860 | -9.535  | -2.782 | 1.00 | 0.00 |
| ATOM | 893 | O    | GLN | 56 | -10.557 | -9.155  | -1.669 | 1.00 | 0.00 |
| ATOM | 894 | N    | GLN | 57 | -10.192 | -9.150  | -3.835 | 1.00 | 0.00 |
| ATOM | 895 | H    | GLN | 57 | -10.438 | -9.463  | -4.763 | 1.00 | 0.00 |
| ATOM | 896 | CA   | GLN | 57 | -9.031  | -8.228  | -3.685 | 1.00 | 0.00 |
| ATOM | 897 | HA   | GLN | 57 | -8.185  | -8.754  | -3.241 | 1.00 | 0.00 |
| ATOM | 898 | CB   | GLN | 57 | -8.614  | -7.705  | -5.061 | 1.00 | 0.00 |
| ATOM | 899 | HB2  | GLN | 57 | -9.460  | -7.208  | -5.534 | 1.00 | 0.00 |
| ATOM | 900 | HB3  | GLN | 57 | -7.793  | -6.997  | -4.949 | 1.00 | 0.00 |
| ATOM | 901 | CG   | GLN | 57 | -8.160  | -8.877  | -5.933 | 1.00 | 0.00 |
| ATOM | 902 | HG2  | GLN | 57 | -7.272  | -9.344  | -5.507 | 1.00 | 0.00 |

|      |     |      |     |    |         |         |        |      |      |
|------|-----|------|-----|----|---------|---------|--------|------|------|
| ATOM | 903 | HG3  | GLN | 57 | -8.955  | -9.618  | -6.015 | 1.00 | 0.00 |
| ATOM | 904 | CD   | GLN | 57 | -7.820  | -8.368  | -7.335 | 1.00 | 0.00 |
| ATOM | 905 | OE1  | GLN | 57 | -8.214  | -7.283  | -7.713 | 1.00 | 0.00 |
| ATOM | 906 | NE2  | GLN | 57 | -7.098  | -9.113  | -8.128 | 1.00 | 0.00 |
| ATOM | 907 | HE21 | GLN | 57 | -6.869  | -8.785  | -9.055 | 1.00 | 0.00 |
| ATOM | 908 | HE22 | GLN | 57 | -6.771  | -10.015 | -7.811 | 1.00 | 0.00 |
| ATOM | 909 | C    | GLN | 57 | -9.426  | -7.052  | -2.788 | 1.00 | 0.00 |
| ATOM | 910 | O    | GLN | 57 | -8.697  | -6.667  | -1.896 | 1.00 | 0.00 |
| ATOM | 911 | N    | GLN | 58 | -10.575 | -6.477  | -3.018 | 1.00 | 0.00 |
| ATOM | 912 | H    | GLN | 58 | -11.187 | -6.792  | -3.757 | 1.00 | 0.00 |
| ATOM | 913 | CA   | GLN | 58 | -11.014 | -5.328  | -2.179 | 1.00 | 0.00 |
| ATOM | 914 | HA   | GLN | 58 | -10.432 | -4.439  | -2.422 | 1.00 | 0.00 |
| ATOM | 915 | CB   | GLN | 58 | -12.492 | -5.034  | -2.447 | 1.00 | 0.00 |
| ATOM | 916 | HB2  | GLN | 58 | -13.093 | -5.895  | -2.153 | 1.00 | 0.00 |
| ATOM | 917 | HB3  | GLN | 58 | -12.800 | -4.163  | -1.870 | 1.00 | 0.00 |
| ATOM | 918 | CG   | GLN | 58 | -12.695 | -4.756  | -3.938 | 1.00 | 0.00 |
| ATOM | 919 | HG2  | GLN | 58 | -11.912 | -4.096  | -4.312 | 1.00 | 0.00 |
| ATOM | 920 | HG3  | GLN | 58 | -12.682 | -5.689  | -4.502 | 1.00 | 0.00 |
| ATOM | 921 | CD   | GLN | 58 | -14.050 | -4.076  | -4.148 | 1.00 | 0.00 |
| ATOM | 922 | OE1  | GLN | 58 | -14.192 | -3.234  | -5.012 | 1.00 | 0.00 |
| ATOM | 923 | NE2  | GLN | 58 | -15.058 | -4.409  | -3.390 | 1.00 | 0.00 |
| ATOM | 924 | HE21 | GLN | 58 | -15.955 | -3.965  | -3.523 | 1.00 | 0.00 |

|      |     |      |     |    |         |         |        |      |      |
|------|-----|------|-----|----|---------|---------|--------|------|------|
| ATOM | 925 | HE22 | GLN | 58 | -14.937 | -5.111  | -2.673 | 1.00 | 0.00 |
| ATOM | 926 | C    | GLN | 58 | -10.826 | -5.675  | -0.701 | 1.00 | 0.00 |
| ATOM | 927 | O    | GLN | 58 | -10.394 | -4.858  | 0.088  | 1.00 | 0.00 |
| ATOM | 928 | N    | ARG | 59 | -11.148 | -6.881  | -0.319 | 1.00 | 0.00 |
| ATOM | 929 | H    | ARG | 59 | -11.508 | -7.566  | -0.969 | 1.00 | 0.00 |
| ATOM | 930 | CA   | ARG | 59 | -10.990 | -7.277  | 1.108  | 1.00 | 0.00 |
| ATOM | 931 | HA   | ARG | 59 | -11.726 | -6.764  | 1.727  | 1.00 | 0.00 |
| ATOM | 932 | CB   | ARG | 59 | -11.203 | -8.786  | 1.245  | 1.00 | 0.00 |
| ATOM | 933 | HB2  | ARG | 59 | -10.474 | -9.315  | 0.630  | 1.00 | 0.00 |
| ATOM | 934 | HB3  | ARG | 59 | -11.078 | -9.079  | 2.288  | 1.00 | 0.00 |
| ATOM | 935 | CG   | ARG | 59 | -12.616 | -9.144  | 0.781  | 1.00 | 0.00 |
| ATOM | 936 | HG2  | ARG | 59 | -13.345 | -8.590  | 1.372  | 1.00 | 0.00 |
| ATOM | 937 | HG3  | ARG | 59 | -12.730 | -8.885  | -0.272 | 1.00 | 0.00 |
| ATOM | 938 | CD   | ARG | 59 | -12.847 | -10.646 | 0.964  | 1.00 | 0.00 |
| ATOM | 939 | HD2  | ARG | 59 | -12.058 | -11.213 | 0.470  | 1.00 | 0.00 |
| ATOM | 940 | HD3  | ARG | 59 | -12.866 | -10.900 | 2.024  | 1.00 | 0.00 |
| ATOM | 941 | NE   | ARG | 59 | -14.156 | -11.023 | 0.359  | 1.00 | 0.00 |
| ATOM | 942 | HE   | ARG | 59 | -14.249 | -11.201 | -0.631 | 1.00 | 0.00 |
| ATOM | 943 | CZ   | ARG | 59 | -15.216 | -11.131 | 1.114  | 1.00 | 0.00 |
| ATOM | 944 | NH1  | ARG | 59 | -15.515 | -12.278 | 1.659  | 1.00 | 0.00 |
| ATOM | 945 | HH11 | ARG | 59 | -14.924 | -13.081 | 1.495  | 1.00 | 0.00 |
| ATOM | 946 | HH12 | ARG | 59 | -16.335 | -12.358 | 2.242  | 1.00 | 0.00 |

|      |     |      |     |    |         |         |        |      |      |
|------|-----|------|-----|----|---------|---------|--------|------|------|
| ATOM | 947 | NH2  | ARG | 59 | -15.976 | -10.090 | 1.323  | 1.00 | 0.00 |
| ATOM | 948 | HH21 | ARG | 59 | -15.741 | -9.204  | 0.899  | 1.00 | 0.00 |
| ATOM | 949 | HH22 | ARG | 59 | -16.795 | -10.176 | 1.907  | 1.00 | 0.00 |
| ATOM | 950 | C    | ARG | 59 | -9.585  | -6.913  | 1.587  | 1.00 | 0.00 |
| ATOM | 951 | O    | ARG | 59 | -9.371  | -6.620  | 2.746  | 1.00 | 0.00 |
| ATOM | 952 | N    | CYX | 60 | -8.625  | -6.922  | 0.705  | 1.00 | 0.00 |
| ATOM | 953 | H    | CYX | 60 | -8.792  | -7.162  | -0.262 | 1.00 | 0.00 |
| ATOM | 954 | CA   | CYX | 60 | -7.237  | -6.570  | 1.115  | 1.00 | 0.00 |
| ATOM | 955 | HA   | CYX | 60 | -6.787  | -7.390  | 1.676  | 1.00 | 0.00 |
| ATOM | 956 | CB   | CYX | 60 | -6.390  | -6.309  | -0.134 | 1.00 | 0.00 |
| ATOM | 957 | HB2  | CYX | 60 | -6.139  | -7.258  | -0.609 | 1.00 | 0.00 |
| ATOM | 958 | HB3  | CYX | 60 | -6.953  | -5.691  | -0.833 | 1.00 | 0.00 |
| ATOM | 959 | SG   | CYX | 60 | -4.832  | -5.517  | 0.338  | 1.00 | 0.00 |
| ATOM | 960 | C    | CYX | 60 | -7.279  | -5.310  | 1.982  | 1.00 | 0.00 |
| ATOM | 961 | O    | CYX | 60 | -7.367  | -5.379  | 3.193  | 1.00 | 0.00 |
| ATOM | 962 | N    | CYX | 61 | -7.217  | -4.162  | 1.370  | 1.00 | 0.00 |
| ATOM | 963 | H    | CYX | 61 | -7.140  | -4.099  | 0.365  | 1.00 | 0.00 |
| ATOM | 964 | CA   | CYX | 61 | -7.255  | -2.897  | 2.157  | 1.00 | 0.00 |
| ATOM | 965 | HA   | CYX | 61 | -6.283  | -2.710  | 2.615  | 1.00 | 0.00 |
| ATOM | 966 | CB   | CYX | 61 | -7.595  | -1.726  | 1.234  | 1.00 | 0.00 |
| ATOM | 967 | HB2  | CYX | 61 | -7.673  | -2.083  | 0.207  | 1.00 | 0.00 |
| ATOM | 968 | HB3  | CYX | 61 | -8.544  | -1.287  | 1.539  | 1.00 | 0.00 |

|      |     |     |     |    |         |        |       |      |      |
|------|-----|-----|-----|----|---------|--------|-------|------|------|
| ATOM | 969 | SG  | CYX | 61 | -6.261  | -0.503 | 1.297 | 1.00 | 0.00 |
| ATOM | 970 | C   | CYX | 61 | -8.319  | -3.014 | 3.251 | 1.00 | 0.00 |
| ATOM | 971 | O   | CYX | 61 | -8.132  | -2.563 | 4.363 | 1.00 | 0.00 |
| ATOM | 972 | N   | ASP | 62 | -9.433  | -3.618 | 2.942 | 1.00 | 0.00 |
| ATOM | 973 | H   | ASP | 62 | -9.594  | -3.996 | 2.019 | 1.00 | 0.00 |
| ATOM | 974 | CA  | ASP | 62 | -10.509 | -3.764 | 3.964 | 1.00 | 0.00 |
| ATOM | 975 | HA  | ASP | 62 | -10.839 | -2.784 | 4.307 | 1.00 | 0.00 |
| ATOM | 976 | CB  | ASP | 62 | -11.703 | -4.494 | 3.348 | 1.00 | 0.00 |
| ATOM | 977 | HB2 | ASP | 62 | -11.372 | -5.444 | 2.928 | 1.00 | 0.00 |
| ATOM | 978 | HB3 | ASP | 62 | -12.452 | -4.679 | 4.117 | 1.00 | 0.00 |
| ATOM | 979 | CG  | ASP | 62 | -12.312 | -3.632 | 2.240 | 1.00 | 0.00 |
| ATOM | 980 | OD1 | ASP | 62 | -11.958 | -2.466 | 2.162 | 1.00 | 0.00 |
| ATOM | 981 | OD2 | ASP | 62 | -13.121 | -4.150 | 1.488 | 1.00 | 0.00 |
| ATOM | 982 | C   | ASP | 62 | -9.978  | -4.567 | 5.151 | 1.00 | 0.00 |
| ATOM | 983 | O   | ASP | 62 | -10.308 | -4.303 | 6.291 | 1.00 | 0.00 |
| ATOM | 984 | N   | GLU | 63 | -9.154  | -5.543 | 4.895 | 1.00 | 0.00 |
| ATOM | 985 | H   | GLU | 63 | -8.875  | -5.770 | 3.951 | 1.00 | 0.00 |
| ATOM | 986 | CA  | GLU | 63 | -8.597  | -6.358 | 6.010 | 1.00 | 0.00 |
| ATOM | 987 | HA  | GLU | 63 | -9.404  | -6.790 | 6.602 | 1.00 | 0.00 |
| ATOM | 988 | CB  | GLU | 63 | -7.748  | -7.495 | 5.438 | 1.00 | 0.00 |
| ATOM | 989 | HB2 | GLU | 63 | -7.144  | -7.118 | 4.612 | 1.00 | 0.00 |
| ATOM | 990 | HB3 | GLU | 63 | -7.093  | -7.887 | 6.216 | 1.00 | 0.00 |

|      |      |      |     |    |        |         |       |      |      |
|------|------|------|-----|----|--------|---------|-------|------|------|
| ATOM | 991  | CG   | GLU | 63 | -8.663 | -8.611  | 4.932 | 1.00 | 0.00 |
| ATOM | 992  | HG2  | GLU | 63 | -9.340 | -8.916  | 5.730 | 1.00 | 0.00 |
| ATOM | 993  | HG3  | GLU | 63 | -9.243 | -8.249  | 4.083 | 1.00 | 0.00 |
| ATOM | 994  | CD   | GLU | 63 | -7.816 | -9.808  | 4.497 | 1.00 | 0.00 |
| ATOM | 995  | OE1  | GLU | 63 | -6.604 | -9.726  | 4.617 | 1.00 | 0.00 |
| ATOM | 996  | OE2  | GLU | 63 | -8.393 | -10.787 | 4.051 | 1.00 | 0.00 |
| ATOM | 997  | C    | GLU | 63 | -7.729 | -5.465  | 6.897 | 1.00 | 0.00 |
| ATOM | 998  | O    | GLU | 63 | -7.871 | -5.443  | 8.103 | 1.00 | 0.00 |
| ATOM | 999  | N    | LEU | 64 | -6.830 | -4.727  | 6.306 | 1.00 | 0.00 |
| ATOM | 1000 | H    | LEU | 64 | -6.709 | -4.743  | 5.303 | 1.00 | 0.00 |
| ATOM | 1001 | CA   | LEU | 64 | -5.950 | -3.833  | 7.109 | 1.00 | 0.00 |
| ATOM | 1002 | HA   | LEU | 64 | -5.475 | -4.393  | 7.915 | 1.00 | 0.00 |
| ATOM | 1003 | CB   | LEU | 64 | -4.858 | -3.251  | 6.208 | 1.00 | 0.00 |
| ATOM | 1004 | HB2  | LEU | 64 | -5.308 | -2.585  | 5.473 | 1.00 | 0.00 |
| ATOM | 1005 | HB3  | LEU | 64 | -4.145 | -2.693  | 6.816 | 1.00 | 0.00 |
| ATOM | 1006 | CG   | LEU | 64 | -4.132 | -4.388  | 5.487 | 1.00 | 0.00 |
| ATOM | 1007 | HG   | LEU | 64 | -4.823 | -4.891  | 4.810 | 1.00 | 0.00 |
| ATOM | 1008 | CD1  | LEU | 64 | -2.960 | -3.816  | 4.686 | 1.00 | 0.00 |
| ATOM | 1009 | HD11 | LEU | 64 | -2.268 | -3.314  | 5.362 | 1.00 | 0.00 |
| ATOM | 1010 | HD12 | LEU | 64 | -2.441 | -4.626  | 4.172 | 1.00 | 0.00 |
| ATOM | 1011 | HD13 | LEU | 64 | -3.334 | -3.102  | 3.953 | 1.00 | 0.00 |
| ATOM | 1012 | CD2  | LEU | 64 | -3.604 | -5.391  | 6.514 | 1.00 | 0.00 |



|      |      |      |     |    |         |        |        |      |      |
|------|------|------|-----|----|---------|--------|--------|------|------|
| ATOM | 1013 | HD21 | LEU | 64 | -4.437  | -5.799 | 7.086  | 1.00 | 0.00 |
| ATOM | 1014 | HD22 | LEU | 64 | -3.087  | -6.201 | 5.999  | 1.00 | 0.00 |
| ATOM | 1015 | HD23 | LEU | 64 | -2.911  | -4.890 | 7.189  | 1.00 | 0.00 |
| ATOM | 1016 | C    | LEU | 64 | -6.777  | -2.690 | 7.706  | 1.00 | 0.00 |
| ATOM | 1017 | O    | LEU | 64 | -6.266  | -1.853 | 8.422  | 1.00 | 0.00 |
| ATOM | 1018 | N    | ASN | 65 | -8.051  | -2.646 | 7.420  | 1.00 | 0.00 |
| ATOM | 1019 | H    | ASN | 65 | -8.487  | -3.338 | 6.828  | 1.00 | 0.00 |
| ATOM | 1020 | CA   | ASN | 65 | -8.901  | -1.554 | 7.977  | 1.00 | 0.00 |
| ATOM | 1021 | HA   | ASN | 65 | -8.276  | -0.742 | 8.349  | 1.00 | 0.00 |
| ATOM | 1022 | CB   | ASN | 65 | -9.813  | -1.005 | 6.878  | 1.00 | 0.00 |
| ATOM | 1023 | HB2  | ASN | 65 | -10.499 | -1.781 | 6.537  | 1.00 | 0.00 |
| ATOM | 1024 | HB3  | ASN | 65 | -10.383 | -0.154 | 7.250  | 1.00 | 0.00 |
| ATOM | 1025 | CG   | ASN | 65 | -8.967  | -0.545 | 5.692  | 1.00 | 0.00 |
| ATOM | 1026 | OD1  | ASN | 65 | -9.483  | -0.558 | 4.493  | 1.00 | 0.00 |
| ATOM | 1027 | ND2  | ASN | 65 | -7.822  | -0.170 | 5.855  | 1.00 | 0.00 |
| ATOM | 1028 | HD21 | ASN | 65 | -7.274  | 0.131  | 5.061  | 1.00 | 0.00 |
| ATOM | 1029 | HD22 | ASN | 65 | -7.424  | -0.162 | 6.783  | 1.00 | 0.00 |
| ATOM | 1030 | C    | ASN | 65 | -9.760  | -2.104 | 9.118  | 1.00 | 0.00 |
| ATOM | 1031 | O    | ASN | 65 | -10.400 | -1.363 | 9.836  | 1.00 | 0.00 |
| ATOM | 1032 | N    | GLU | 66 | -9.782  | -3.398 | 9.290  | 1.00 | 0.00 |
| ATOM | 1033 | H    | GLU | 66 | -9.253  | -4.024 | 8.699  | 1.00 | 0.00 |
| ATOM | 1034 | CA   | GLU | 66 | -10.606 | -3.987 | 10.385 | 1.00 | 0.00 |

|      |      |     |     |    |         |        |        |      |      |
|------|------|-----|-----|----|---------|--------|--------|------|------|
| ATOM | 1035 | HA  | GLU | 66 | -10.781 | -3.249 | 11.167 | 1.00 | 0.00 |
| ATOM | 1036 | CB  | GLU | 66 | -11.957 | -4.430 | 9.820  | 1.00 | 0.00 |
| ATOM | 1037 | HB2 | GLU | 66 | -11.806 | -5.251 | 9.119  | 1.00 | 0.00 |
| ATOM | 1038 | HB3 | GLU | 66 | -12.600 | -4.763 | 10.635 | 1.00 | 0.00 |
| ATOM | 1039 | CG  | GLU | 66 | -12.618 | -3.256 | 9.096  | 1.00 | 0.00 |
| ATOM | 1040 | HG2 | GLU | 66 | -12.874 | -2.482 | 9.819  | 1.00 | 0.00 |
| ATOM | 1041 | HG3 | GLU | 66 | -11.928 | -2.849 | 8.357  | 1.00 | 0.00 |
| ATOM | 1042 | CD  | GLU | 66 | -13.889 | -3.739 | 8.395  | 1.00 | 0.00 |
| ATOM | 1043 | OE1 | GLU | 66 | -14.077 | -4.943 | 8.317  | 1.00 | 0.00 |
| ATOM | 1044 | OE2 | GLU | 66 | -14.652 | -2.899 | 7.948  | 1.00 | 0.00 |
| ATOM | 1045 | C   | GLU | 66 | -9.886  | -5.198 | 10.986 | 1.00 | 0.00 |
| ATOM | 1046 | O   | GLU | 66 | -10.007 | -5.482 | 12.160 | 1.00 | 0.00 |
| ATOM | 1047 | N   | MET | 67 | -9.142  | -5.917 | 10.191 | 1.00 | 0.00 |
| ATOM | 1048 | H   | MET | 67 | -9.034  | -5.692 | 9.212  | 1.00 | 0.00 |
| ATOM | 1049 | CA  | MET | 67 | -8.424  | -7.110 | 10.724 | 1.00 | 0.00 |
| ATOM | 1050 | HA  | MET | 67 | -9.089  | -7.703 | 11.352 | 1.00 | 0.00 |
| ATOM | 1051 | CB  | MET | 67 | -7.948  | -7.980 | 9.559  | 1.00 | 0.00 |
| ATOM | 1052 | HB2 | MET | 67 | -8.118  | -7.456 | 8.619  | 1.00 | 0.00 |
| ATOM | 1053 | HB3 | MET | 67 | -6.884  | -8.188 | 9.671  | 1.00 | 0.00 |
| ATOM | 1054 | CG  | MET | 67 | -8.727  | -9.297 | 9.556  | 1.00 | 0.00 |
| ATOM | 1055 | HG2 | MET | 67 | -9.147  | -9.480 | 10.545 | 1.00 | 0.00 |
| ATOM | 1056 | HG3 | MET | 67 | -9.532  | -9.248 | 8.823  | 1.00 | 0.00 |

|      |      |     |     |    |        |         |        |      |      |
|------|------|-----|-----|----|--------|---------|--------|------|------|
| ATOM | 1057 | SD  | MET | 67 | -7.612 | -10.655 | 9.123  | 1.00 | 0.00 |
| ATOM | 1058 | CE  | MET | 67 | -7.502 | -10.301 | 7.352  | 1.00 | 0.00 |
| ATOM | 1059 | HE1 | MET | 67 | -7.094 | -9.301  | 7.205  | 1.00 | 0.00 |
| ATOM | 1060 | HE2 | MET | 67 | -6.849 | -11.033 | 6.875  | 1.00 | 0.00 |
| ATOM | 1061 | HE3 | MET | 67 | -8.495 | -10.357 | 6.907  | 1.00 | 0.00 |
| ATOM | 1062 | C   | MET | 67 | -7.219 | -6.658  | 11.548 | 1.00 | 0.00 |
| ATOM | 1063 | O   | MET | 67 | -7.237 | -6.688  | 12.763 | 1.00 | 0.00 |
| ATOM | 1064 | N   | GLU | 68 | -6.171 | -6.242  | 10.897 | 1.00 | 0.00 |
| ATOM | 1065 | H   | GLU | 68 | -6.150 | -6.218  | 9.887  | 1.00 | 0.00 |
| ATOM | 1066 | CA  | GLU | 68 | -4.961 | -5.790  | 11.639 | 1.00 | 0.00 |
| ATOM | 1067 | HA  | GLU | 68 | -4.755 | -6.462  | 12.473 | 1.00 | 0.00 |
| ATOM | 1068 | CB  | GLU | 68 | -3.755 | -5.796  | 10.698 | 1.00 | 0.00 |
| ATOM | 1069 | HB2 | GLU | 68 | -3.846 | -4.978  | 9.984  | 1.00 | 0.00 |
| ATOM | 1070 | HB3 | GLU | 68 | -2.840 | -5.672  | 11.278 | 1.00 | 0.00 |
| ATOM | 1071 | CG  | GLU | 68 | -3.704 | -7.126  | 9.944  | 1.00 | 0.00 |
| ATOM | 1072 | HG2 | GLU | 68 | -3.499 | -7.935  | 10.646 | 1.00 | 0.00 |
| ATOM | 1073 | HG3 | GLU | 68 | -4.662 | -7.304  | 9.456  | 1.00 | 0.00 |
| ATOM | 1074 | CD  | GLU | 68 | -2.597 | -7.074  | 8.889  | 1.00 | 0.00 |
| ATOM | 1075 | OE1 | GLU | 68 | -2.028 | -6.010  | 8.707  | 1.00 | 0.00 |
| ATOM | 1076 | OE2 | GLU | 68 | -2.336 | -8.100  | 8.281  | 1.00 | 0.00 |
| ATOM | 1077 | C   | GLU | 68 | -5.184 | -4.374  | 12.175 | 1.00 | 0.00 |
| ATOM | 1078 | O   | GLU | 68 | -4.302 | -3.776  | 12.758 | 1.00 | 0.00 |

|      |      |      |     |    |        |        |        |      |      |
|------|------|------|-----|----|--------|--------|--------|------|------|
| ATOM | 1079 | N    | ASN | 69 | -6.356 | -3.833 | 11.984 | 1.00 | 0.00 |
| ATOM | 1080 | H    | ASN | 69 | -7.096 | -4.323 | 11.502 | 1.00 | 0.00 |
| ATOM | 1081 | CA   | ASN | 69 | -6.629 | -2.455 | 12.484 | 1.00 | 0.00 |
| ATOM | 1082 | HA   | ASN | 69 | -7.553 | -2.072 | 12.052 | 1.00 | 0.00 |
| ATOM | 1083 | CB   | ASN | 69 | -6.777 | -2.486 | 14.007 | 1.00 | 0.00 |
| ATOM | 1084 | HB2  | ASN | 69 | -5.843 | -2.805 | 14.471 | 1.00 | 0.00 |
| ATOM | 1085 | HB3  | ASN | 69 | -7.049 | -1.499 | 14.380 | 1.00 | 0.00 |
| ATOM | 1086 | CG   | ASN | 69 | -7.877 | -3.475 | 14.393 | 1.00 | 0.00 |
| ATOM | 1087 | OD1  | ASN | 69 | -8.812 | -3.687 | 13.645 | 1.00 | 0.00 |
| ATOM | 1088 | ND2  | ASN | 69 | -7.806 | -4.096 | 15.539 | 1.00 | 0.00 |
| ATOM | 1089 | HD21 | ASN | 69 | -8.529 | -4.751 | 15.801 | 1.00 | 0.00 |
| ATOM | 1090 | HD22 | ASN | 69 | -7.028 | -3.919 | 16.159 | 1.00 | 0.00 |
| ATOM | 1091 | C    | ASN | 69 | -5.466 | -1.537 | 12.101 | 1.00 | 0.00 |
| ATOM | 1092 | O    | ASN | 69 | -5.209 | -0.543 | 12.751 | 1.00 | 0.00 |
| ATOM | 1093 | N    | THR | 70 | -4.763 | -1.864 | 11.053 | 1.00 | 0.00 |
| ATOM | 1094 | H    | THR | 70 | -4.974 | -2.690 | 10.510 | 1.00 | 0.00 |
| ATOM | 1095 | CA   | THR | 70 | -3.615 | -1.012 | 10.627 | 1.00 | 0.00 |
| ATOM | 1096 | HA   | THR | 70 | -2.748 | -1.196 | 11.261 | 1.00 | 0.00 |
| ATOM | 1097 | CB   | THR | 70 | -3.242 | -1.346 | 9.180  | 1.00 | 0.00 |
| ATOM | 1098 | HB   | THR | 70 | -2.233 | -0.988 | 8.974  | 1.00 | 0.00 |
| ATOM | 1099 | CG2  | THR | 70 | -3.297 | -2.861 | 8.972  | 1.00 | 0.00 |
| ATOM | 1100 | HG21 | THR | 70 | -4.305 | -3.221 | 9.178  | 1.00 | 0.00 |

|      |      |      |     |    |        |        |        |      |      |
|------|------|------|-----|----|--------|--------|--------|------|------|
| ATOM | 1101 | HG22 | THR | 70 | -3.031 | -3.097 | 7.941  | 1.00 | 0.00 |
| ATOM | 1102 | HG23 | THR | 70 | -2.593 | -3.347 | 9.648  | 1.00 | 0.00 |
| ATOM | 1103 | OG1  | THR | 70 | -4.156 | -0.711 | 8.297  | 1.00 | 0.00 |
| ATOM | 1104 | HG1  | THR | 70 | -3.922 | -0.921 | 7.390  | 1.00 | 0.00 |
| ATOM | 1105 | C    | THR | 70 | -4.010 | 0.463  | 10.724 | 1.00 | 0.00 |
| ATOM | 1106 | O    | THR | 70 | -5.176 | 0.805  | 10.731 | 1.00 | 0.00 |
| ATOM | 1107 | N    | GLN | 71 | -3.047 | 1.342  | 10.800 | 1.00 | 0.00 |
| ATOM | 1108 | H    | GLN | 71 | -2.075 | 1.066  | 10.795 | 1.00 | 0.00 |
| ATOM | 1109 | CA   | GLN | 71 | -3.370 | 2.794  | 10.897 | 1.00 | 0.00 |
| ATOM | 1110 | HA   | GLN | 71 | -3.989 | 3.100  | 10.054 | 1.00 | 0.00 |
| ATOM | 1111 | CB   | GLN | 71 | -4.140 | 3.060  | 12.191 | 1.00 | 0.00 |
| ATOM | 1112 | HB2  | GLN | 71 | -5.080 | 2.509  | 12.175 | 1.00 | 0.00 |
| ATOM | 1113 | HB3  | GLN | 71 | -3.543 | 2.735  | 13.043 | 1.00 | 0.00 |
| ATOM | 1114 | CG   | GLN | 71 | -4.429 | 4.559  | 12.312 | 1.00 | 0.00 |
| ATOM | 1115 | HG2  | GLN | 71 | -3.517 | 5.133  | 12.149 | 1.00 | 0.00 |
| ATOM | 1116 | HG3  | GLN | 71 | -5.182 | 4.859  | 11.583 | 1.00 | 0.00 |
| ATOM | 1117 | CD   | GLN | 71 | -4.957 | 4.866  | 13.716 | 1.00 | 0.00 |
| ATOM | 1118 | OE1  | GLN | 71 | -4.356 | 4.486  | 14.701 | 1.00 | 0.00 |
| ATOM | 1119 | NE2  | GLN | 71 | -6.065 | 5.543  | 13.848 | 1.00 | 0.00 |
| ATOM | 1120 | HE21 | GLN | 71 | -6.420 | 5.749  | 14.771 | 1.00 | 0.00 |
| ATOM | 1121 | HE22 | GLN | 71 | -6.562 | 5.857  | 13.027 | 1.00 | 0.00 |
| ATOM | 1122 | C    | GLN | 71 | -2.073 | 3.607  | 10.899 | 1.00 | 0.00 |

|      |      |     |     |    |        |       |        |      |      |
|------|------|-----|-----|----|--------|-------|--------|------|------|
| ATOM | 1123 | O   | GLN | 71 | -2.017 | 4.704 | 10.379 | 1.00 | 0.00 |
| ATOM | 1124 | N   | GLY | 72 | -1.031 | 3.081 | 11.484 | 1.00 | 0.00 |
| ATOM | 1125 | H   | GLY | 72 | -1.069 | 2.170 | 11.920 | 1.00 | 0.00 |
| ATOM | 1126 | CA  | GLY | 72 | 0.258  | 3.828 | 11.520 | 1.00 | 0.00 |
| ATOM | 1127 | HA2 | GLY | 72 | 0.100  | 4.856 | 11.194 | 1.00 | 0.00 |
| ATOM | 1128 | HA3 | GLY | 72 | 0.660  | 3.825 | 12.533 | 1.00 | 0.00 |
| ATOM | 1129 | C   | GLY | 72 | 1.266  | 3.158 | 10.583 | 1.00 | 0.00 |
| ATOM | 1130 | O   | GLY | 72 | 1.128  | 2.003 | 10.230 | 1.00 | 0.00 |
| ATOM | 1131 | N   | CYX | 73 | 2.280  | 3.873 | 10.180 | 1.00 | 0.00 |
| ATOM | 1132 | H   | CYX | 73 | 2.400  | 4.833 | 10.470 | 1.00 | 0.00 |
| ATOM | 1133 | CA  | CYX | 73 | 3.296  | 3.279 | 9.267  | 1.00 | 0.00 |
| ATOM | 1134 | HA  | CYX | 73 | 4.118  | 3.977 | 9.110  | 1.00 | 0.00 |
| ATOM | 1135 | CB  | CYX | 73 | 3.855  | 1.998 | 9.889  | 1.00 | 0.00 |
| ATOM | 1136 | HB2 | CYX | 73 | 3.250  | 1.717 | 10.751 | 1.00 | 0.00 |
| ATOM | 1137 | HB3 | CYX | 73 | 3.831  | 1.195 | 9.152  | 1.00 | 0.00 |
| ATOM | 1138 | SG  | CYX | 73 | 5.545  | 2.293 | 10.468 | 1.00 | 0.00 |
| ATOM | 1139 | C   | CYX | 73 | 2.645  | 2.952 | 7.920  | 1.00 | 0.00 |
| ATOM | 1140 | O   | CYX | 73 | 3.230  | 2.300 | 7.078  | 1.00 | 0.00 |
| ATOM | 1141 | N   | MET | 74 | 1.438  | 3.401 | 7.711  | 1.00 | 0.00 |
| ATOM | 1142 | H   | MET | 74 | 0.947  | 3.944 | 8.406  | 1.00 | 0.00 |
| ATOM | 1143 | CA  | MET | 74 | 0.750  | 3.116 | 6.421  | 1.00 | 0.00 |
| ATOM | 1144 | HA  | MET | 74 | 0.386  | 2.088 | 6.405  | 1.00 | 0.00 |

|      |      |     |     |    |        |       |       |      |      |
|------|------|-----|-----|----|--------|-------|-------|------|------|
| ATOM | 1145 | CB  | MET | 74 | -0.444 | 4.061 | 6.260 | 1.00 | 0.00 |
| ATOM | 1146 | HB2 | MET | 74 | -0.087 | 5.086 | 6.163 | 1.00 | 0.00 |
| ATOM | 1147 | HB3 | MET | 74 | -1.008 | 3.787 | 5.368 | 1.00 | 0.00 |
| ATOM | 1148 | CG  | MET | 74 | -1.348 | 3.949 | 7.490 | 1.00 | 0.00 |
| ATOM | 1149 | HG2 | MET | 74 | -1.489 | 2.899 | 7.749 | 1.00 | 0.00 |
| ATOM | 1150 | HG3 | MET | 74 | -0.893 | 4.472 | 8.331 | 1.00 | 0.00 |
| ATOM | 1151 | SD  | MET | 74 | -2.957 | 4.694 | 7.126 | 1.00 | 0.00 |
| ATOM | 1152 | CE  | MET | 74 | -3.827 | 3.164 | 6.704 | 1.00 | 0.00 |
| ATOM | 1153 | HE1 | MET | 74 | -3.811 | 2.488 | 7.560 | 1.00 | 0.00 |
| ATOM | 1154 | HE2 | MET | 74 | -4.859 | 3.393 | 6.441 | 1.00 | 0.00 |
| ATOM | 1155 | HE3 | MET | 74 | -3.334 | 2.687 | 5.857 | 1.00 | 0.00 |
| ATOM | 1156 | C   | MET | 74 | 1.731  | 3.329 | 5.266 | 1.00 | 0.00 |
| ATOM | 1157 | O   | MET | 74 | 1.957  | 2.447 | 4.461 | 1.00 | 0.00 |
| ATOM | 1158 | N   | CYX | 75 | 2.317  | 4.492 | 5.179 | 1.00 | 0.00 |
| ATOM | 1159 | H   | CYX | 75 | 2.136  | 5.231 | 5.843 | 1.00 | 0.00 |
| ATOM | 1160 | CA  | CYX | 75 | 3.283  | 4.755 | 4.076 | 1.00 | 0.00 |
| ATOM | 1161 | HA  | CYX | 75 | 2.754  | 4.878 | 3.131 | 1.00 | 0.00 |
| ATOM | 1162 | CB  | CYX | 75 | 4.059  | 6.040 | 4.373 | 1.00 | 0.00 |
| ATOM | 1163 | HB2 | CYX | 75 | 3.366  | 6.818 | 4.691 | 1.00 | 0.00 |
| ATOM | 1164 | HB3 | CYX | 75 | 4.783  | 5.852 | 5.166 | 1.00 | 0.00 |
| ATOM | 1165 | SG  | CYX | 75 | 4.881  | 6.609 | 2.865 | 1.00 | 0.00 |
| ATOM | 1166 | C   | CYX | 75 | 4.259  | 3.584 | 3.963 | 1.00 | 0.00 |

|      |      |     |     |    |       |        |       |      |      |
|------|------|-----|-----|----|-------|--------|-------|------|------|
| ATOM | 1167 | O   | CYX | 75 | 4.468 | 3.038  | 2.897 | 1.00 | 0.00 |
| ATOM | 1168 | N   | GLU | 76 | 4.858 | 3.188  | 5.054 | 1.00 | 0.00 |
| ATOM | 1169 | H   | GLU | 76 | 4.692 | 3.633  | 5.945 | 1.00 | 0.00 |
| ATOM | 1170 | CA  | GLU | 76 | 5.816 | 2.048  | 5.002 | 1.00 | 0.00 |
| ATOM | 1171 | HA  | GLU | 76 | 6.659 | 2.292  | 4.356 | 1.00 | 0.00 |
| ATOM | 1172 | CB  | GLU | 76 | 6.346 | 1.758  | 6.408 | 1.00 | 0.00 |
| ATOM | 1173 | HB2 | GLU | 76 | 5.519 | 1.470  | 7.057 | 1.00 | 0.00 |
| ATOM | 1174 | HB3 | GLU | 76 | 7.071 | 0.945  | 6.363 | 1.00 | 0.00 |
| ATOM | 1175 | CG  | GLU | 76 | 7.020 | 3.012  | 6.967 | 1.00 | 0.00 |
| ATOM | 1176 | HG2 | GLU | 76 | 7.772 | 3.364  | 6.261 | 1.00 | 0.00 |
| ATOM | 1177 | HG3 | GLU | 76 | 6.272 | 3.789  | 7.120 | 1.00 | 0.00 |
| ATOM | 1178 | CD  | GLU | 76 | 7.691 | 2.681  | 8.302 | 1.00 | 0.00 |
| ATOM | 1179 | OE1 | GLU | 76 | 7.684 | 1.518  | 8.674 | 1.00 | 0.00 |
| ATOM | 1180 | OE2 | GLU | 76 | 8.199 | 3.594  | 8.930 | 1.00 | 0.00 |
| ATOM | 1181 | C   | GLU | 76 | 5.095 | 0.812  | 4.461 | 1.00 | 0.00 |
| ATOM | 1182 | O   | GLU | 76 | 5.711 | -0.129 | 3.999 | 1.00 | 0.00 |
| ATOM | 1183 | N   | ALA | 77 | 3.790 | 0.813  | 4.506 | 1.00 | 0.00 |
| ATOM | 1184 | H   | ALA | 77 | 3.272 | 1.591  | 4.887 | 1.00 | 0.00 |
| ATOM | 1185 | CA  | ALA | 77 | 3.028 | -0.356 | 3.987 | 1.00 | 0.00 |
| ATOM | 1186 | HA  | ALA | 77 | 3.497 | -1.304 | 4.254 | 1.00 | 0.00 |
| ATOM | 1187 | CB  | ALA | 77 | 1.607 | -0.336 | 4.555 | 1.00 | 0.00 |
| ATOM | 1188 | HB1 | ALA | 77 | 1.122 | 0.602  | 4.288 | 1.00 | 0.00 |



|      |      |          |    |        |        |        |      |      |
|------|------|----------|----|--------|--------|--------|------|------|
| ATOM | 1189 | HB2 ALA  | 77 | 1.039  | -1.170 | 4.142  | 1.00 | 0.00 |
| ATOM | 1190 | HB3 ALA  | 77 | 1.648  | -0.428 | 5.640  | 1.00 | 0.00 |
| ATOM | 1191 | C ALA    | 77 | 2.972  | -0.277 | 2.462  | 1.00 | 0.00 |
| ATOM | 1192 | O ALA    | 77 | 3.430  | -1.164 | 1.768  | 1.00 | 0.00 |
| ATOM | 1193 | N LEU    | 78 | 2.422  | 0.780  | 1.932  | 1.00 | 0.00 |
| ATOM | 1194 | H LEU    | 78 | 2.040  | 1.523  | 2.499  | 1.00 | 0.00 |
| ATOM | 1195 | CA LEU   | 78 | 2.350  | 0.914  | 0.451  | 1.00 | 0.00 |
| ATOM | 1196 | HA LEU   | 78 | 1.704  | 0.141  | 0.034  | 1.00 | 0.00 |
| ATOM | 1197 | CB LEU   | 78 | 1.774  | 2.283  | 0.085  | 1.00 | 0.00 |
| ATOM | 1198 | HB2 LEU  | 78 | 0.816  | 2.420  | 0.586  | 1.00 | 0.00 |
| ATOM | 1199 | HB3 LEU  | 78 | 2.464  | 3.065  | 0.402  | 1.00 | 0.00 |
| ATOM | 1200 | CG LEU   | 78 | 1.574  | 2.363  | -1.428 | 1.00 | 0.00 |
| ATOM | 1201 | HG LEU   | 78 | 2.484  | 2.038  | -1.933 | 1.00 | 0.00 |
| ATOM | 1202 | CD1 LEU  | 78 | 0.412  | 1.456  | -1.838 | 1.00 | 0.00 |
| ATOM | 1203 | HD11 LEU | 78 | -0.498 | 1.780  | -1.334 | 1.00 | 0.00 |
| ATOM | 1204 | HD12 LEU | 78 | 0.269  | 1.513  | -2.917 | 1.00 | 0.00 |
| ATOM | 1205 | HD13 LEU | 78 | 0.636  | 0.427  | -1.555 | 1.00 | 0.00 |
| ATOM | 1206 | CD2 LEU  | 78 | 1.259  | 3.806  | -1.827 | 1.00 | 0.00 |
| ATOM | 1207 | HD21 LEU | 78 | 2.087  | 4.452  | -1.536 | 1.00 | 0.00 |
| ATOM | 1208 | HD22 LEU | 78 | 1.117  | 3.862  | -2.906 | 1.00 | 0.00 |
| ATOM | 1209 | HD23 LEU | 78 | 0.349  | 4.132  | -1.323 | 1.00 | 0.00 |
| ATOM | 1210 | C LEU    | 78 | 3.760  | 0.781  | -0.125 | 1.00 | 0.00 |

|      |      |      |     |    |       |        |        |      |      |
|------|------|------|-----|----|-------|--------|--------|------|------|
| ATOM | 1211 | O    | LEU | 78 | 3.983 | 0.081  | -1.092 | 1.00 | 0.00 |
| ATOM | 1212 | N    | GLN | 79 | 4.714 | 1.446  | 0.468  | 1.00 | 0.00 |
| ATOM | 1213 | H    | GLN | 79 | 4.534 | 2.029  | 1.273  | 1.00 | 0.00 |
| ATOM | 1214 | CA   | GLN | 79 | 6.110 | 1.355  | -0.039 | 1.00 | 0.00 |
| ATOM | 1215 | HA   | GLN | 79 | 6.181 | 1.801  | -1.031 | 1.00 | 0.00 |
| ATOM | 1216 | CB   | GLN | 79 | 7.050 | 2.110  | 0.905  | 1.00 | 0.00 |
| ATOM | 1217 | HB2  | GLN | 79 | 6.921 | 1.737  | 1.921  | 1.00 | 0.00 |
| ATOM | 1218 | HB3  | GLN | 79 | 8.082 | 1.956  | 0.590  | 1.00 | 0.00 |
| ATOM | 1219 | CG   | GLN | 79 | 6.722 | 3.604  | 0.864  | 1.00 | 0.00 |
| ATOM | 1220 | HG2  | GLN | 79 | 6.893 | 4.000  | -0.137 | 1.00 | 0.00 |
| ATOM | 1221 | HG3  | GLN | 79 | 5.684 | 3.772  | 1.148  | 1.00 | 0.00 |
| ATOM | 1222 | CD   | GLN | 79 | 7.626 | 4.351  | 1.847  | 1.00 | 0.00 |
| ATOM | 1223 | OE1  | GLN | 79 | 7.849 | 5.625  | 1.671  | 1.00 | 0.00 |
| ATOM | 1224 | NE2  | GLN | 79 | 8.136 | 3.769  | 2.784  | 1.00 | 0.00 |
| ATOM | 1225 | HE21 | GLN | 79 | 8.731 | 4.274  | 3.425  | 1.00 | 0.00 |
| ATOM | 1226 | HE22 | GLN | 79 | 7.963 | 2.782  | 2.917  | 1.00 | 0.00 |
| ATOM | 1227 | C    | GLN | 79 | 6.525 | -0.113 | -0.105 | 1.00 | 0.00 |
| ATOM | 1228 | O    | GLN | 79 | 7.089 | -0.567 | -1.080 | 1.00 | 0.00 |
| ATOM | 1229 | N    | GLN | 80 | 6.242 | -0.863 | 0.924  | 1.00 | 0.00 |
| ATOM | 1230 | H    | GLN | 80 | 5.770 | -0.496 | 1.737  | 1.00 | 0.00 |
| ATOM | 1231 | CA   | GLN | 80 | 6.615 | -2.305 | 0.916  | 1.00 | 0.00 |
| ATOM | 1232 | HA   | GLN | 80 | 7.700 | -2.414 | 0.897  | 1.00 | 0.00 |

|      |      |      |     |    |       |        |        |      |      |
|------|------|------|-----|----|-------|--------|--------|------|------|
| ATOM | 1233 | CB   | GLN | 80 | 6.078 | -2.981 | 2.179  | 1.00 | 0.00 |
| ATOM | 1234 | HB2  | GLN | 80 | 6.402 | -2.422 | 3.057  | 1.00 | 0.00 |
| ATOM | 1235 | HB3  | GLN | 80 | 4.989 | -3.004 | 2.145  | 1.00 | 0.00 |
| ATOM | 1236 | CG   | GLN | 80 | 6.615 | -4.411 | 2.259  | 1.00 | 0.00 |
| ATOM | 1237 | HG2  | GLN | 80 | 6.155 | -4.941 | 3.093  | 1.00 | 0.00 |
| ATOM | 1238 | HG3  | GLN | 80 | 6.410 | -4.946 | 1.332  | 1.00 | 0.00 |
| ATOM | 1239 | CD   | GLN | 80 | 8.129 | -4.376 | 2.478  | 1.00 | 0.00 |
| ATOM | 1240 | OE1  | GLN | 80 | 8.616 | -3.649 | 3.321  | 1.00 | 0.00 |
| ATOM | 1241 | NE2  | GLN | 80 | 8.899 | -5.136 | 1.748  | 1.00 | 0.00 |
| ATOM | 1242 | HE21 | GLN | 80 | 9.899 | -5.119 | 1.887  | 1.00 | 0.00 |
| ATOM | 1243 | HE22 | GLN | 80 | 8.491 | -5.739 | 1.047  | 1.00 | 0.00 |
| ATOM | 1244 | C    | GLN | 80 | 6.005 | -2.972 | -0.318 | 1.00 | 0.00 |
| ATOM | 1245 | O    | GLN | 80 | 6.670 | -3.691 | -1.038 | 1.00 | 0.00 |
| ATOM | 1246 | N    | ILE | 81 | 4.748 | -2.733 | -0.571 | 1.00 | 0.00 |
| ATOM | 1247 | H    | ILE | 81 | 4.190 | -2.135 | 0.021  | 1.00 | 0.00 |
| ATOM | 1248 | CA   | ILE | 81 | 4.101 | -3.348 | -1.763 | 1.00 | 0.00 |
| ATOM | 1249 | HA   | ILE | 81 | 3.970 | -4.417 | -1.595 | 1.00 | 0.00 |
| ATOM | 1250 | CB   | ILE | 81 | 2.736 | -2.697 | -1.993 | 1.00 | 0.00 |
| ATOM | 1251 | HB   | ILE | 81 | 2.860 | -1.619 | -2.089 | 1.00 | 0.00 |
| ATOM | 1252 | CG2  | ILE | 81 | 2.113 | -3.254 | -3.274 | 1.00 | 0.00 |
| ATOM | 1253 | HG21 | ILE | 81 | 1.989 | -4.333 | -3.179 | 1.00 | 0.00 |
| ATOM | 1254 | HG22 | ILE | 81 | 1.141 | -2.790 | -3.437 | 1.00 | 0.00 |

|      |      |      |     |    |        |        |        |      |      |
|------|------|------|-----|----|--------|--------|--------|------|------|
| ATOM | 1255 | HG23 | ILE | 81 | 2.765  | -3.038 | -4.120 | 1.00 | 0.00 |
| ATOM | 1256 | CG1  | ILE | 81 | 1.817  | -3.001 | -0.808 | 1.00 | 0.00 |
| ATOM | 1257 | HG12 | ILE | 81 | 1.775  | -4.079 | -0.649 | 1.00 | 0.00 |
| ATOM | 1258 | HG13 | ILE | 81 | 2.207  | -2.517 | 0.087  | 1.00 | 0.00 |
| ATOM | 1259 | CD1  | ILE | 81 | 0.411  | -2.473 | -1.102 | 1.00 | 0.00 |
| ATOM | 1260 | HD11 | ILE | 81 | 0.021  | -2.957 | -1.997 | 1.00 | 0.00 |
| ATOM | 1261 | HD12 | ILE | 81 | -0.243 | -2.690 | -0.258 | 1.00 | 0.00 |
| ATOM | 1262 | HD13 | ILE | 81 | 0.453  | -1.396 | -1.261 | 1.00 | 0.00 |
| ATOM | 1263 | C    | ILE | 81 | 4.991  | -3.121 | -2.985 | 1.00 | 0.00 |
| ATOM | 1264 | O    | ILE | 81 | 5.483  | -4.054 | -3.590 | 1.00 | 0.00 |
| ATOM | 1265 | N    | MET | 82 | 5.208  | -1.887 | -3.350 | 1.00 | 0.00 |
| ATOM | 1266 | H    | MET | 82 | 4.804  | -1.108 | -2.851 | 1.00 | 0.00 |
| ATOM | 1267 | CA   | MET | 82 | 6.072  | -1.600 | -4.528 | 1.00 | 0.00 |
| ATOM | 1268 | HA   | MET | 82 | 5.542  | -1.830 | -5.452 | 1.00 | 0.00 |
| ATOM | 1269 | CB   | MET | 82 | 6.446  | -0.116 | -4.535 | 1.00 | 0.00 |
| ATOM | 1270 | HB2  | MET | 82 | 7.101  | 0.098  | -3.690 | 1.00 | 0.00 |
| ATOM | 1271 | HB3  | MET | 82 | 6.963  | 0.124  | -5.464 | 1.00 | 0.00 |
| ATOM | 1272 | CG   | MET | 82 | 5.177  | 0.731  | -4.424 | 1.00 | 0.00 |
| ATOM | 1273 | HG2  | MET | 82 | 4.734  | 0.605  | -3.436 | 1.00 | 0.00 |
| ATOM | 1274 | HG3  | MET | 82 | 5.420  | 1.781  | -4.582 | 1.00 | 0.00 |
| ATOM | 1275 | SD   | MET | 82 | 3.988  | 0.200  | -5.681 | 1.00 | 0.00 |
| ATOM | 1276 | CE   | MET | 82 | 4.973  | 0.656  | -7.130 | 1.00 | 0.00 |

|      |      |     |     |    |        |        |        |      |      |
|------|------|-----|-----|----|--------|--------|--------|------|------|
| ATOM | 1277 | HE1 | MET | 82 | 5.914  | 0.105  | -7.119 | 1.00 | 0.00 |
| ATOM | 1278 | HE2 | MET | 82 | 4.421  | 0.411  | -8.037 | 1.00 | 0.00 |
| ATOM | 1279 | HE3 | MET | 82 | 5.179  | 1.726  | -7.108 | 1.00 | 0.00 |
| ATOM | 1280 | C   | MET | 82 | 7.342  | -2.445 | -4.442 | 1.00 | 0.00 |
| ATOM | 1281 | O   | MET | 82 | 7.703  | -3.140 | -5.369 | 1.00 | 0.00 |
| ATOM | 1282 | N   | GLU | 83 | 8.018  | -2.396 | -3.330 | 1.00 | 0.00 |
| ATOM | 1283 | H   | GLU | 83 | 7.722  | -1.824 | -2.553 | 1.00 | 0.00 |
| ATOM | 1284 | CA  | GLU | 83 | 9.263  | -3.199 | -3.181 | 1.00 | 0.00 |
| ATOM | 1285 | HA  | GLU | 83 | 9.942  | -3.003 | -4.011 | 1.00 | 0.00 |
| ATOM | 1286 | CB  | GLU | 83 | 9.964  | -2.816 | -1.875 | 1.00 | 0.00 |
| ATOM | 1287 | HB2 | GLU | 83 | 9.271  | -2.934 | -1.042 | 1.00 | 0.00 |
| ATOM | 1288 | HB3 | GLU | 83 | 10.828 | -3.463 | -1.722 | 1.00 | 0.00 |
| ATOM | 1289 | CG  | GLU | 83 | 10.425 | -1.359 | -1.953 | 1.00 | 0.00 |
| ATOM | 1290 | HG2 | GLU | 83 | 11.056 | -1.223 | -2.832 | 1.00 | 0.00 |
| ATOM | 1291 | HG3 | GLU | 83 | 9.555  | -0.707 | -2.026 | 1.00 | 0.00 |
| ATOM | 1292 | CD  | GLU | 83 | 11.221 | -1.008 | -0.695 | 1.00 | 0.00 |
| ATOM | 1293 | OE1 | GLU | 83 | 11.289 | -1.841 | 0.192  | 1.00 | 0.00 |
| ATOM | 1294 | OE2 | GLU | 83 | 11.751 | 0.090  | -0.641 | 1.00 | 0.00 |
| ATOM | 1295 | C   | GLU | 83 | 8.903  | -4.685 | -3.152 | 1.00 | 0.00 |
| ATOM | 1296 | O   | GLU | 83 | 9.751  | -5.543 | -3.294 | 1.00 | 0.00 |
| ATOM | 1297 | N   | ASN | 84 | 7.648  | -4.992 | -2.973 | 1.00 | 0.00 |
| ATOM | 1298 | H   | ASN | 84 | 6.940  | -4.283 | -2.854 | 1.00 | 0.00 |

|      |      |      |     |    |       |        |        |      |      |
|------|------|------|-----|----|-------|--------|--------|------|------|
| ATOM | 1299 | CA   | ASN | 84 | 7.229 | -6.420 | -2.939 | 1.00 | 0.00 |
| ATOM | 1300 | HA   | ASN | 84 | 7.967 | -7.018 | -2.403 | 1.00 | 0.00 |
| ATOM | 1301 | CB   | ASN | 84 | 5.884 | -6.542 | -2.219 | 1.00 | 0.00 |
| ATOM | 1302 | HB2  | ASN | 84 | 5.927 | -6.043 | -1.251 | 1.00 | 0.00 |
| ATOM | 1303 | HB3  | ASN | 84 | 5.091 | -6.099 | -2.821 | 1.00 | 0.00 |
| ATOM | 1304 | CG   | ASN | 84 | 5.559 | -8.019 | -1.993 | 1.00 | 0.00 |
| ATOM | 1305 | OD1  | ASN | 84 | 6.180 | -8.673 | -1.179 | 1.00 | 0.00 |
| ATOM | 1306 | ND2  | ASN | 84 | 4.604 | -8.578 | -2.685 | 1.00 | 0.00 |
| ATOM | 1307 | HD21 | ASN | 84 | 4.384 | -9.554 | -2.541 | 1.00 | 0.00 |
| ATOM | 1308 | HD22 | ASN | 84 | 4.089 | -8.033 | -3.362 | 1.00 | 0.00 |
| ATOM | 1309 | C    | ASN | 84 | 7.092 | -6.943 | -4.370 | 1.00 | 0.00 |
| ATOM | 1310 | O    | ASN | 84 | 7.141 | -8.133 | -4.612 | 1.00 | 0.00 |
| ATOM | 1311 | N    | GLN | 85 | 6.919 | -6.065 | -5.321 | 1.00 | 0.00 |
| ATOM | 1312 | H    | GLN | 85 | 6.874 | -5.074 | -5.131 | 1.00 | 0.00 |
| ATOM | 1313 | CA   | GLN | 85 | 6.781 | -6.521 | -6.733 | 1.00 | 0.00 |
| ATOM | 1314 | HA   | GLN | 85 | 7.587 | -7.209 | -6.990 | 1.00 | 0.00 |
| ATOM | 1315 | CB   | GLN | 85 | 5.445 | -7.248 | -6.905 | 1.00 | 0.00 |
| ATOM | 1316 | HB2  | GLN | 85 | 5.325 | -7.983 | -6.109 | 1.00 | 0.00 |
| ATOM | 1317 | HB3  | GLN | 85 | 4.629 | -6.527 | -6.859 | 1.00 | 0.00 |
| ATOM | 1318 | CG   | GLN | 85 | 5.422 | -7.957 | -8.261 | 1.00 | 0.00 |
| ATOM | 1319 | HG2  | GLN | 85 | 5.528 | -7.233 | -9.069 | 1.00 | 0.00 |
| ATOM | 1320 | HG3  | GLN | 85 | 6.230 | -8.687 | -8.321 | 1.00 | 0.00 |

|      |      |      |     |    |        |        |         |      |      |
|------|------|------|-----|----|--------|--------|---------|------|------|
| ATOM | 1321 | CD   | GLN | 85 | 4.089  | -8.688 | -8.431  | 1.00 | 0.00 |
| ATOM | 1322 | OE1  | GLN | 85 | 3.387  | -8.928 | -7.469  | 1.00 | 0.00 |
| ATOM | 1323 | NE2  | GLN | 85 | 3.708  | -9.055 | -9.624  | 1.00 | 0.00 |
| ATOM | 1324 | HE21 | GLN | 85 | 2.829  | -9.538 | -9.744  | 1.00 | 0.00 |
| ATOM | 1325 | HE22 | GLN | 85 | 4.294  | -8.855 | -10.422 | 1.00 | 0.00 |
| ATOM | 1326 | C    | GLN | 85 | 6.827  | -5.314 | -7.676  | 1.00 | 0.00 |
| ATOM | 1327 | O    | GLN | 85 | 6.009  | -5.179 | -8.563  | 1.00 | 0.00 |
| ATOM | 1328 | N    | CYX | 86 | 7.781  | -4.439 | -7.497  | 1.00 | 0.00 |
| ATOM | 1329 | H    | CYX | 86 | 8.468  | -4.541 | -6.763  | 1.00 | 0.00 |
| ATOM | 1330 | CA   | CYX | 86 | 7.874  | -3.250 | -8.393  | 1.00 | 0.00 |
| ATOM | 1331 | HA   | CYX | 86 | 6.892  | -3.007 | -8.799  | 1.00 | 0.00 |
| ATOM | 1332 | CB   | CYX | 86 | 8.387  | -2.046 | -7.600  | 1.00 | 0.00 |
| ATOM | 1333 | HB2  | CYX | 86 | 8.591  | -1.221 | -8.283  | 1.00 | 0.00 |
| ATOM | 1334 | HB3  | CYX | 86 | 7.633  | -1.740 | -6.876  | 1.00 | 0.00 |
| ATOM | 1335 | SG   | CYX | 86 | 9.939  | -2.480 | -6.776  | 1.00 | 0.00 |
| ATOM | 1336 | C    | CYX | 86 | 8.840  | -3.552 | -9.539  | 1.00 | 0.00 |
| ATOM | 1337 | O    | CYX | 86 | 8.953  | -2.797 | -10.484 | 1.00 | 0.00 |
| ATOM | 1338 | N    | ASP | 87 | 9.542  | -4.651 | -9.462  | 1.00 | 0.00 |
| ATOM | 1339 | H    | ASP | 87 | 9.455  | -5.283 | -8.679  | 1.00 | 0.00 |
| ATOM | 1340 | CA   | ASP | 87 | 10.501 | -5.000 | -10.547 | 1.00 | 0.00 |
| ATOM | 1341 | HA   | ASP | 87 | 11.389 | -4.370 | -10.485 | 1.00 | 0.00 |
| ATOM | 1342 | CB   | ASP | 87 | 10.928 | -6.462 | -10.398 | 1.00 | 0.00 |

|      |      |     |     |    |        |        |         |      |      |
|------|------|-----|-----|----|--------|--------|---------|------|------|
| ATOM | 1343 | HB2 | ASP | 87 | 10.057 | -7.074 | -10.162 | 1.00 | 0.00 |
| ATOM | 1344 | HB3 | ASP | 87 | 11.372 | -6.808 | -11.332 | 1.00 | 0.00 |
| ATOM | 1345 | CG  | ASP | 87 | 11.955 | -6.582 | -9.270  | 1.00 | 0.00 |
| ATOM | 1346 | OD1 | ASP | 87 | 12.388 | -5.553 | -8.777  | 1.00 | 0.00 |
| ATOM | 1347 | OD2 | ASP | 87 | 12.291 | -7.700 | -8.918  | 1.00 | 0.00 |
| ATOM | 1348 | C   | ASP | 87 | 9.829  | -4.802 | -11.907 | 1.00 | 0.00 |
| ATOM | 1349 | O   | ASP | 87 | 10.387 | -4.202 | -12.805 | 1.00 | 0.00 |
| ATOM | 1350 | N   | ARG | 88 | 8.635  | -5.304 | -12.068 | 1.00 | 0.00 |
| ATOM | 1351 | H   | ARG | 88 | 8.166  | -5.805 | -11.327 | 1.00 | 0.00 |
| ATOM | 1352 | CA  | ARG | 88 | 7.930  | -5.146 | -13.371 | 1.00 | 0.00 |
| ATOM | 1353 | HA  | ARG | 88 | 8.533  | -5.560 | -14.180 | 1.00 | 0.00 |
| ATOM | 1354 | CB  | ARG | 88 | 6.596  | -5.895 | -13.323 | 1.00 | 0.00 |
| ATOM | 1355 | HB2 | ARG | 88 | 6.011  | -5.542 | -12.474 | 1.00 | 0.00 |
| ATOM | 1356 | HB3 | ARG | 88 | 6.044  | -5.714 | -14.245 | 1.00 | 0.00 |
| ATOM | 1357 | CG  | ARG | 88 | 6.858  | -7.395 | -13.172 | 1.00 | 0.00 |
| ATOM | 1358 | HG2 | ARG | 88 | 7.448  | -7.748 | -14.018 | 1.00 | 0.00 |
| ATOM | 1359 | HG3 | ARG | 88 | 7.405  | -7.577 | -12.247 | 1.00 | 0.00 |
| ATOM | 1360 | CD  | ARG | 88 | 5.526  | -8.145 | -13.132 | 1.00 | 0.00 |
| ATOM | 1361 | HD2 | ARG | 88 | 4.865  | -7.700 | -12.389 | 1.00 | 0.00 |
| ATOM | 1362 | HD3 | ARG | 88 | 5.046  | -8.113 | -14.110 | 1.00 | 0.00 |
| ATOM | 1363 | NE  | ARG | 88 | 5.766  | -9.568 | -12.765 | 1.00 | 0.00 |
| ATOM | 1364 | HE  | ARG | 88 | 5.478  | -9.939 | -11.870 | 1.00 | 0.00 |



|      |      |      |     |    |       |         |         |      |      |
|------|------|------|-----|----|-------|---------|---------|------|------|
| ATOM | 1365 | CZ   | ARG | 88 | 6.360 | -10.369 | -13.609 | 1.00 | 0.00 |
| ATOM | 1366 | NH1  | ARG | 88 | 5.653 | -11.180 | -14.346 | 1.00 | 0.00 |
| ATOM | 1367 | HH11 | ARG | 88 | 4.647 | -11.187 | -14.262 | 1.00 | 0.00 |
| ATOM | 1368 | HH12 | ARG | 88 | 6.115 | -11.798 | -14.998 | 1.00 | 0.00 |
| ATOM | 1369 | NH2  | ARG | 88 | 7.661 | -10.356 | -13.715 | 1.00 | 0.00 |
| ATOM | 1370 | HH21 | ARG | 88 | 8.205 | -9.726  | -13.143 | 1.00 | 0.00 |
| ATOM | 1371 | HH22 | ARG | 88 | 8.118 | -10.977 | -14.368 | 1.00 | 0.00 |
| ATOM | 1372 | C    | ARG | 88 | 7.671 | -3.661  | -13.639 | 1.00 | 0.00 |
| ATOM | 1373 | O    | ARG | 88 | 7.315 | -3.272  | -14.733 | 1.00 | 0.00 |
| ATOM | 1374 | N    | LEU | 89 | 7.850 | -2.830  | -12.650 | 1.00 | 0.00 |
| ATOM | 1375 | H    | LEU | 89 | 8.146 | -3.146  | -11.737 | 1.00 | 0.00 |
| ATOM | 1376 | CA   | LEU | 89 | 7.615 | -1.372  | -12.852 | 1.00 | 0.00 |
| ATOM | 1377 | HA   | LEU | 89 | 6.588 | -1.196  | -13.170 | 1.00 | 0.00 |
| ATOM | 1378 | CB   | LEU | 89 | 7.855 | -0.627  | -11.537 | 1.00 | 0.00 |
| ATOM | 1379 | HB2  | LEU | 89 | 7.368 | -1.161  | -10.721 | 1.00 | 0.00 |
| ATOM | 1380 | HB3  | LEU | 89 | 8.926 | -0.568  | -11.344 | 1.00 | 0.00 |
| ATOM | 1381 | CG   | LEU | 89 | 7.277 | 0.785   | -11.639 | 1.00 | 0.00 |
| ATOM | 1382 | HG   | LEU | 89 | 7.691 | 1.285   | -12.515 | 1.00 | 0.00 |
| ATOM | 1383 | CD1  | LEU | 89 | 5.755 | 0.704   | -11.770 | 1.00 | 0.00 |
| ATOM | 1384 | HD11 | LEU | 89 | 5.341 | 0.204   | -10.895 | 1.00 | 0.00 |
| ATOM | 1385 | HD12 | LEU | 89 | 5.342 | 1.710   | -11.843 | 1.00 | 0.00 |
| ATOM | 1386 | HD13 | LEU | 89 | 5.497 | 0.140   | -12.666 | 1.00 | 0.00 |

|      |      |      |     |    |        |        |         |      |      |
|------|------|------|-----|----|--------|--------|---------|------|------|
| ATOM | 1387 | CD2  | LEU | 89 | 7.636  | 1.578  | -10.382 | 1.00 | 0.00 |
| ATOM | 1388 | HD21 | LEU | 89 | 8.720  | 1.636  | -10.286 | 1.00 | 0.00 |
| ATOM | 1389 | HD22 | LEU | 89 | 7.224  | 2.584  | -10.456 | 1.00 | 0.00 |
| ATOM | 1390 | HD23 | LEU | 89 | 7.221  | 1.079  | -9.506  | 1.00 | 0.00 |
| ATOM | 1391 | C    | LEU | 89 | 8.575  | -0.843 | -13.920 | 1.00 | 0.00 |
| ATOM | 1392 | O    | LEU | 89 | 8.392  | 0.232  | -14.455 | 1.00 | 0.00 |
| ATOM | 1393 | N    | GLN | 90 | 9.598  | -1.591 | -14.233 | 1.00 | 0.00 |
| ATOM | 1394 | H    | GLN | 90 | 9.757  | -2.487 | -13.793 | 1.00 | 0.00 |
| ATOM | 1395 | CA   | GLN | 90 | 10.568 | -1.130 | -15.266 | 1.00 | 0.00 |
| ATOM | 1396 | HA   | GLN | 90 | 11.211 | -0.349 | -14.860 | 1.00 | 0.00 |
| ATOM | 1397 | CB   | GLN | 90 | 11.444 | -2.306 | -15.703 | 1.00 | 0.00 |
| ATOM | 1398 | HB2  | GLN | 90 | 10.816 | -3.175 | -15.900 | 1.00 | 0.00 |
| ATOM | 1399 | HB3  | GLN | 90 | 11.987 | -2.039 | -16.610 | 1.00 | 0.00 |
| ATOM | 1400 | CG   | GLN | 90 | 12.442 | -2.640 | -14.591 | 1.00 | 0.00 |
| ATOM | 1401 | HG2  | GLN | 90 | 13.014 | -1.753 | -14.318 | 1.00 | 0.00 |
| ATOM | 1402 | HG3  | GLN | 90 | 11.920 | -3.020 | -13.713 | 1.00 | 0.00 |
| ATOM | 1403 | CD   | GLN | 90 | 13.413 | -3.714 | -15.085 | 1.00 | 0.00 |
| ATOM | 1404 | OE1  | GLN | 90 | 13.188 | -4.328 | -16.109 | 1.00 | 0.00 |
| ATOM | 1405 | NE2  | GLN | 90 | 14.490 | -3.970 | -14.394 | 1.00 | 0.00 |
| ATOM | 1406 | HE21 | GLN | 90 | 15.136 | -4.678 | -14.714 | 1.00 | 0.00 |
| ATOM | 1407 | HE22 | GLN | 90 | 14.673 | -3.460 | -13.542 | 1.00 | 0.00 |
| ATOM | 1408 | C    | GLN | 90 | 9.806  | -0.587 | -16.475 | 1.00 | 0.00 |

|      |      |     |     |    |        |        |         |      |      |
|------|------|-----|-----|----|--------|--------|---------|------|------|
| ATOM | 1409 | O   | GLN | 90 | 10.304 | 0.234  | -17.219 | 1.00 | 0.00 |
| ATOM | 1410 | N   | ASP | 91 | 8.598  | -1.039 | -16.679 | 1.00 | 0.00 |
| ATOM | 1411 | H   | ASP | 91 | 8.177  | -1.721 | -16.064 | 1.00 | 0.00 |
| ATOM | 1412 | CA  | ASP | 91 | 7.804  | -0.550 | -17.840 | 1.00 | 0.00 |
| ATOM | 1413 | HA  | ASP | 91 | 8.363  | -0.688 | -18.766 | 1.00 | 0.00 |
| ATOM | 1414 | CB  | ASP | 91 | 6.499  | -1.341 | -17.935 | 1.00 | 0.00 |
| ATOM | 1415 | HB2 | ASP | 91 | 5.966  | -1.278 | -16.986 | 1.00 | 0.00 |
| ATOM | 1416 | HB3 | ASP | 91 | 5.878  | -0.925 | -18.728 | 1.00 | 0.00 |
| ATOM | 1417 | CG  | ASP | 91 | 6.811  | -2.805 | -18.247 | 1.00 | 0.00 |
| ATOM | 1418 | OD1 | ASP | 91 | 7.941  | -3.084 | -18.614 | 1.00 | 0.00 |
| ATOM | 1419 | OD2 | ASP | 91 | 5.916  | -3.624 | -18.115 | 1.00 | 0.00 |
| ATOM | 1420 | C   | ASP | 91 | 7.487  | 0.935  | -17.651 | 1.00 | 0.00 |
| ATOM | 1421 | O   | ASP | 91 | 7.217  | 1.389  | -16.556 | 1.00 | 0.00 |
| ATOM | 1422 | N   | ARG | 92 | 7.520  | 1.698  | -18.710 | 1.00 | 0.00 |
| ATOM | 1423 | H   | ARG | 92 | 7.746  | 1.329  | -19.623 | 1.00 | 0.00 |
| ATOM | 1424 | CA  | ARG | 92 | 7.221  | 3.153  | -18.590 | 1.00 | 0.00 |
| ATOM | 1425 | HA  | ARG | 92 | 7.797  | 3.590  | -17.774 | 1.00 | 0.00 |
| ATOM | 1426 | CB  | ARG | 92 | 7.600  | 3.862  | -19.891 | 1.00 | 0.00 |
| ATOM | 1427 | HB2 | ARG | 92 | 8.676  | 3.783  | -20.047 | 1.00 | 0.00 |
| ATOM | 1428 | HB3 | ARG | 92 | 7.078  | 3.393  | -20.725 | 1.00 | 0.00 |
| ATOM | 1429 | CG  | ARG | 92 | 7.204  | 5.336  | -19.805 | 1.00 | 0.00 |
| ATOM | 1430 | HG2 | ARG | 92 | 6.161  | 5.414  | -19.499 | 1.00 | 0.00 |

|      |      |          |    |        |       |         |      |      |
|------|------|----------|----|--------|-------|---------|------|------|
| ATOM | 1431 | HG3 ARG  | 92 | 7.836  | 5.840 | -19.074 | 1.00 | 0.00 |
| ATOM | 1432 | CD ARG   | 92 | 7.384  | 5.994 | -21.174 | 1.00 | 0.00 |
| ATOM | 1433 | HD2 ARG  | 92 | 6.672  | 5.580 | -21.888 | 1.00 | 0.00 |
| ATOM | 1434 | HD3 ARG  | 92 | 7.236  | 7.071 | -21.097 | 1.00 | 0.00 |
| ATOM | 1435 | NE ARG   | 92 | 8.764  | 5.736 | -21.672 | 1.00 | 0.00 |
| ATOM | 1436 | HE ARG   | 92 | 9.362  | 5.047 | -21.237 | 1.00 | 0.00 |
| ATOM | 1437 | CZ ARG   | 92 | 9.225  | 6.404 | -22.693 | 1.00 | 0.00 |
| ATOM | 1438 | NH1 ARG  | 92 | 8.960  | 7.676 | -22.813 | 1.00 | 0.00 |
| ATOM | 1439 | HH11 ARG | 92 | 8.398  | 8.139 | -22.114 | 1.00 | 0.00 |
| ATOM | 1440 | HH12 ARG | 92 | 9.319  | 8.190 | -23.605 | 1.00 | 0.00 |
| ATOM | 1441 | NH2 ARG  | 92 | 9.953  | 5.801 | -23.593 | 1.00 | 0.00 |
| ATOM | 1442 | HH21 ARG | 92 | 10.158 | 4.816 | -23.496 | 1.00 | 0.00 |
| ATOM | 1443 | HH22 ARG | 92 | 10.309 | 6.321 | -24.382 | 1.00 | 0.00 |
| ATOM | 1444 | C ARG    | 92 | 5.727  | 3.346 | -18.321 | 1.00 | 0.00 |
| ATOM | 1445 | O ARG    | 92 | 5.294  | 4.396 | -17.888 | 1.00 | 0.00 |
| ATOM | 1446 | N GLN    | 93 | 4.934  | 2.342 | -18.575 | 1.00 | 0.00 |
| ATOM | 1447 | H GLN    | 93 | 5.286  | 1.466 | -18.936 | 1.00 | 0.00 |
| ATOM | 1448 | CA GLN   | 93 | 3.470  | 2.469 | -18.335 | 1.00 | 0.00 |
| ATOM | 1449 | HA GLN   | 93 | 3.113  | 3.440 | -18.675 | 1.00 | 0.00 |
| ATOM | 1450 | CB GLN   | 93 | 2.731  | 1.376 | -19.113 | 1.00 | 0.00 |
| ATOM | 1451 | HB2 GLN  | 93 | 3.091  | 1.355 | -20.142 | 1.00 | 0.00 |
| ATOM | 1452 | HB3 GLN  | 93 | 2.915  | 0.408 | -18.645 | 1.00 | 0.00 |

|      |      |      |     |    |        |        |         |      |      |
|------|------|------|-----|----|--------|--------|---------|------|------|
| ATOM | 1453 | CG   | GLN | 93 | 1.229  | 1.670  | -19.104 | 1.00 | 0.00 |
| ATOM | 1454 | HG2  | GLN | 93 | 0.831  | 1.580  | -18.093 | 1.00 | 0.00 |
| ATOM | 1455 | HG3  | GLN | 93 | 1.039  | 2.674  | -19.481 | 1.00 | 0.00 |
| ATOM | 1456 | CD   | GLN | 93 | 0.508  | 0.665  | -20.005 | 1.00 | 0.00 |
| ATOM | 1457 | OE1  | GLN | 93 | 1.137  | -0.073 | -20.737 | 1.00 | 0.00 |
| ATOM | 1458 | NE2  | GLN | 93 | -0.795 | 0.604  | -19.981 | 1.00 | 0.00 |
| ATOM | 1459 | HE21 | GLN | 93 | -1.277 | -0.057 | -20.573 | 1.00 | 0.00 |
| ATOM | 1460 | HE22 | GLN | 93 | -1.315 | 1.218  | -19.371 | 1.00 | 0.00 |
| ATOM | 1461 | C    | GLN | 93 | 3.179  | 2.317  | -16.840 | 1.00 | 0.00 |
| ATOM | 1462 | O    | GLN | 93 | 2.503  | 3.133  | -16.245 | 1.00 | 0.00 |
| ATOM | 1463 | N    | MET | 94 | 3.683  | 1.280  | -16.229 | 1.00 | 0.00 |
| ATOM | 1464 | H    | MET | 94 | 4.248  | 0.599  | -16.717 | 1.00 | 0.00 |
| ATOM | 1465 | CA   | MET | 94 | 3.433  | 1.077  | -14.774 | 1.00 | 0.00 |
| ATOM | 1466 | HA   | MET | 94 | 2.368  | 0.933  | -14.590 | 1.00 | 0.00 |
| ATOM | 1467 | CB   | MET | 94 | 4.183  | -0.166 | -14.294 | 1.00 | 0.00 |
| ATOM | 1468 | HB2  | MET | 94 | 5.212  | -0.131 | -14.654 | 1.00 | 0.00 |
| ATOM | 1469 | HB3  | MET | 94 | 4.181  | -0.193 | -13.204 | 1.00 | 0.00 |
| ATOM | 1470 | CG   | MET | 94 | 3.497  | -1.421 | -14.836 | 1.00 | 0.00 |
| ATOM | 1471 | HG2  | MET | 94 | 3.177  | -1.251 | -15.864 | 1.00 | 0.00 |
| ATOM | 1472 | HG3  | MET | 94 | 4.191  | -2.262 | -14.807 | 1.00 | 0.00 |
| ATOM | 1473 | SD   | MET | 94 | 2.051  | -1.807 | -13.818 | 1.00 | 0.00 |
| ATOM | 1474 | CE   | MET | 94 | 2.900  | -1.866 | -12.220 | 1.00 | 0.00 |

|      |      |      |     |    |       |        |         |      |      |
|------|------|------|-----|----|-------|--------|---------|------|------|
| ATOM | 1475 | HE1  | MET | 94 | 3.364 | -0.901 | -12.018 | 1.00 | 0.00 |
| ATOM | 1476 | HE2  | MET | 94 | 2.181 | -2.095 | -11.434 | 1.00 | 0.00 |
| ATOM | 1477 | HE3  | MET | 94 | 3.668 | -2.639 | -12.244 | 1.00 | 0.00 |
| ATOM | 1478 | C    | MET | 94 | 3.926 | 2.298  | -13.993 | 1.00 | 0.00 |
| ATOM | 1479 | O    | MET | 94 | 3.296 | 2.742  | -13.055 | 1.00 | 0.00 |
| ATOM | 1480 | N    | VAL | 95 | 5.054 | 2.838  | -14.369 | 1.00 | 0.00 |
| ATOM | 1481 | H    | VAL | 95 | 5.585 | 2.469  | -15.145 | 1.00 | 0.00 |
| ATOM | 1482 | CA   | VAL | 95 | 5.593 | 4.026  | -13.645 | 1.00 | 0.00 |
| ATOM | 1483 | HA   | VAL | 95 | 6.090 | 3.714  | -12.726 | 1.00 | 0.00 |
| ATOM | 1484 | CB   | VAL | 95 | 6.611 | 4.745  | -14.532 | 1.00 | 0.00 |
| ATOM | 1485 | HB   | VAL | 95 | 6.156 | 4.976  | -15.495 | 1.00 | 0.00 |
| ATOM | 1486 | CG1  | VAL | 95 | 7.053 | 6.042  | -13.853 | 1.00 | 0.00 |
| ATOM | 1487 | HG11 | VAL | 95 | 7.509 | 5.811  | -12.890 | 1.00 | 0.00 |
| ATOM | 1488 | HG12 | VAL | 95 | 7.779 | 6.554  | -14.485 | 1.00 | 0.00 |
| ATOM | 1489 | HG13 | VAL | 95 | 6.187 | 6.685  | -13.699 | 1.00 | 0.00 |
| ATOM | 1490 | CG2  | VAL | 95 | 7.828 | 3.842  | -14.746 | 1.00 | 0.00 |
| ATOM | 1491 | HG21 | VAL | 95 | 7.514 | 2.916  | -15.230 | 1.00 | 0.00 |
| ATOM | 1492 | HG22 | VAL | 95 | 8.554 | 4.353  | -15.378 | 1.00 | 0.00 |
| ATOM | 1493 | HG23 | VAL | 95 | 8.284 | 3.611  | -13.783 | 1.00 | 0.00 |
| ATOM | 1494 | C    | VAL | 95 | 4.451 | 4.985  | -13.298 | 1.00 | 0.00 |
| ATOM | 1495 | O    | VAL | 95 | 3.824 | 4.868  | -12.264 | 1.00 | 0.00 |
| ATOM | 1496 | N    | GLN | 96 | 4.179 | 5.933  | -14.151 | 1.00 | 0.00 |

|      |      |      |     |    |        |        |         |      |      |
|------|------|------|-----|----|--------|--------|---------|------|------|
| ATOM | 1497 | H    | GLN | 96 | 4.698  | 6.039  | -15.011 | 1.00 | 0.00 |
| ATOM | 1498 | CA   | GLN | 96 | 3.080  | 6.898  | -13.865 | 1.00 | 0.00 |
| ATOM | 1499 | HA   | GLN | 96 | 3.319  | 7.492  | -12.983 | 1.00 | 0.00 |
| ATOM | 1500 | CB   | GLN | 96 | 2.905  | 7.841  | -15.058 | 1.00 | 0.00 |
| ATOM | 1501 | HB2  | GLN | 96 | 2.621  | 7.264  | -15.938 | 1.00 | 0.00 |
| ATOM | 1502 | HB3  | GLN | 96 | 2.126  | 8.569  | -14.834 | 1.00 | 0.00 |
| ATOM | 1503 | CG   | GLN | 96 | 4.222  | 8.570  | -15.330 | 1.00 | 0.00 |
| ATOM | 1504 | HG2  | GLN | 96 | 4.559  | 9.094  | -14.435 | 1.00 | 0.00 |
| ATOM | 1505 | HG3  | GLN | 96 | 4.988  | 7.860  | -15.644 | 1.00 | 0.00 |
| ATOM | 1506 | CD   | GLN | 96 | 4.016  | 9.594  | -16.448 | 1.00 | 0.00 |
| ATOM | 1507 | OE1  | GLN | 96 | 3.296  | 10.559 | -16.280 | 1.00 | 0.00 |
| ATOM | 1508 | NE2  | GLN | 96 | 4.624  | 9.426  | -17.591 | 1.00 | 0.00 |
| ATOM | 1509 | HE21 | GLN | 96 | 4.493  | 10.098 | -18.333 | 1.00 | 0.00 |
| ATOM | 1510 | HE22 | GLN | 96 | 5.223  | 8.624  | -17.728 | 1.00 | 0.00 |
| ATOM | 1511 | C    | GLN | 96 | 1.779  | 6.136  | -13.621 | 1.00 | 0.00 |
| ATOM | 1512 | O    | GLN | 96 | 1.139  | 6.287  | -12.599 | 1.00 | 0.00 |
| ATOM | 1513 | N    | GLN | 97 | 1.383  | 5.319  | -14.553 | 1.00 | 0.00 |
| ATOM | 1514 | H    | GLN | 97 | 1.910  | 5.194  | -15.405 | 1.00 | 0.00 |
| ATOM | 1515 | CA   | GLN | 97 | 0.123  | 4.543  | -14.382 | 1.00 | 0.00 |
| ATOM | 1516 | HA   | GLN | 97 | -0.742 | 5.188  | -14.532 | 1.00 | 0.00 |
| ATOM | 1517 | CB   | GLN | 97 | 0.077  | 3.415  | -15.415 | 1.00 | 0.00 |
| ATOM | 1518 | HB2  | GLN | 97 | 0.403  | 3.794  | -16.384 | 1.00 | 0.00 |

|      |      |      |     |    |        |        |         |      |      |
|------|------|------|-----|----|--------|--------|---------|------|------|
| ATOM | 1519 | HB3  | GLN | 97 | 0.738  | 2.606  | -15.102 | 1.00 | 0.00 |
| ATOM | 1520 | CG   | GLN | 97 | -1.355 | 2.888  | -15.529 | 1.00 | 0.00 |
| ATOM | 1521 | HG2  | GLN | 97 | -1.391 | 2.029  | -16.200 | 1.00 | 0.00 |
| ATOM | 1522 | HG3  | GLN | 97 | -1.729 | 2.597  | -14.547 | 1.00 | 0.00 |
| ATOM | 1523 | CD   | GLN | 97 | -2.259 | 3.986  | -16.091 | 1.00 | 0.00 |
| ATOM | 1524 | OE1  | GLN | 97 | -2.137 | 4.362  | -17.240 | 1.00 | 0.00 |
| ATOM | 1525 | NE2  | GLN | 97 | -3.170 | 4.519  | -15.323 | 1.00 | 0.00 |
| ATOM | 1526 | HE21 | GLN | 97 | -3.771 | 5.244  | -15.687 | 1.00 | 0.00 |
| ATOM | 1527 | HE22 | GLN | 97 | -3.269 | 4.203  | -14.369 | 1.00 | 0.00 |
| ATOM | 1528 | C    | GLN | 97 | 0.072  | 3.951  | -12.972 | 1.00 | 0.00 |
| ATOM | 1529 | O    | GLN | 97 | -0.726 | 4.353  | -12.148 | 1.00 | 0.00 |
| ATOM | 1530 | N    | PHE | 98 | 0.919  | 3.000  | -12.686 | 1.00 | 0.00 |
| ATOM | 1531 | H    | PHE | 98 | 1.586  | 2.654  | -13.361 | 1.00 | 0.00 |
| ATOM | 1532 | CA   | PHE | 98 | 0.911  | 2.391  | -11.325 | 1.00 | 0.00 |
| ATOM | 1533 | HA   | PHE | 98 | -0.011 | 1.830  | -11.173 | 1.00 | 0.00 |
| ATOM | 1534 | CB   | PHE | 98 | 2.097  | 1.434  | -11.169 | 1.00 | 0.00 |
| ATOM | 1535 | HB2  | PHE | 98 | 2.144  | 0.704  | -11.978 | 1.00 | 0.00 |
| ATOM | 1536 | HB3  | PHE | 98 | 3.048  | 1.963  | -11.103 | 1.00 | 0.00 |
| ATOM | 1537 | CG   | PHE | 98 | 1.949  | 0.647  | -9.884  | 1.00 | 0.00 |
| ATOM | 1538 | CD1  | PHE | 98 | 0.749  | 0.695  | -9.159  | 1.00 | 0.00 |
| ATOM | 1539 | HD1  | PHE | 98 | -0.081 | 1.300  | -9.522  | 1.00 | 0.00 |
| ATOM | 1540 | CE1  | PHE | 98 | 0.618  | -0.033 | -7.972  | 1.00 | 0.00 |



|      |      |         |    |        |        |         |      |      |
|------|------|---------|----|--------|--------|---------|------|------|
| ATOM | 1541 | HE1 PHE | 98 | -0.316 | 0.005  | -7.411  | 1.00 | 0.00 |
| ATOM | 1542 | CZ PHE  | 98 | 1.683  | -0.810 | -7.504  | 1.00 | 0.00 |
| ATOM | 1543 | HZ PHE  | 98 | 1.580  | -1.377 | -6.578  | 1.00 | 0.00 |
| ATOM | 1544 | CE2 PHE | 98 | 2.882  | -0.860 | -8.225  | 1.00 | 0.00 |
| ATOM | 1545 | HE2 PHE | 98 | 3.712  | -1.466 | -7.861  | 1.00 | 0.00 |
| ATOM | 1546 | CD2 PHE | 98 | 3.015  | -0.132 | -9.414  | 1.00 | 0.00 |
| ATOM | 1547 | HD2 PHE | 98 | 3.949  | -0.171 | -9.975  | 1.00 | 0.00 |
| ATOM | 1548 | C PHE   | 98 | 1.010  | 3.500  | -10.279 | 1.00 | 0.00 |
| ATOM | 1549 | O PHE   | 98 | 0.380  | 3.448  | -9.242  | 1.00 | 0.00 |
| ATOM | 1550 | N LYS   | 99 | 1.795  | 4.506  | -10.547 | 1.00 | 0.00 |
| ATOM | 1551 | H LYS   | 99 | 2.321  | 4.554  | -11.408 | 1.00 | 0.00 |
| ATOM | 1552 | CA LYS  | 99 | 1.932  | 5.623  | -9.572  | 1.00 | 0.00 |
| ATOM | 1553 | HA LYS  | 99 | 2.226  | 5.237  | -8.596  | 1.00 | 0.00 |
| ATOM | 1554 | CB LYS  | 99 | 3.007  | 6.597  | -10.056 | 1.00 | 0.00 |
| ATOM | 1555 | HB2 LYS | 99 | 3.920  | 6.047  | -10.284 | 1.00 | 0.00 |
| ATOM | 1556 | HB3 LYS | 99 | 2.658  | 7.107  | -10.954 | 1.00 | 0.00 |
| ATOM | 1557 | CG LYS  | 99 | 3.292  | 7.628  | -8.961  | 1.00 | 0.00 |
| ATOM | 1558 | HG2 LYS | 99 | 2.365  | 8.129  | -8.682  | 1.00 | 0.00 |
| ATOM | 1559 | HG3 LYS | 99 | 3.711  | 7.126  | -8.088  | 1.00 | 0.00 |
| ATOM | 1560 | CD LYS  | 99 | 4.292  | 8.661  | -9.484  | 1.00 | 0.00 |
| ATOM | 1561 | HD2 LYS | 99 | 5.239  | 8.170  | -9.708  | 1.00 | 0.00 |
| ATOM | 1562 | HD3 LYS | 99 | 3.899  | 9.121  | -10.390 | 1.00 | 0.00 |

|      |      |     |     |     |        |        |         |      |      |
|------|------|-----|-----|-----|--------|--------|---------|------|------|
| ATOM | 1563 | CE  | LYS | 99  | 4.515  | 9.738  | -8.420  | 1.00 | 0.00 |
| ATOM | 1564 | HE2 | LYS | 99  | 4.335  | 10.721 | -8.854  | 1.00 | 0.00 |
| ATOM | 1565 | HE3 | LYS | 99  | 3.828  | 9.576  | -7.589  | 1.00 | 0.00 |
| ATOM | 1566 | NZ  | LYS | 99  | 5.918  | 9.664  | -7.925  | 1.00 | 0.00 |
| ATOM | 1567 | HZ1 | LYS | 99  | 6.555  | 9.814  | -8.695  | 1.00 | 0.00 |
| ATOM | 1568 | HZ2 | LYS | 99  | 6.065  | 10.374 | -7.223  | 1.00 | 0.00 |
| ATOM | 1569 | HZ3 | LYS | 99  | 6.086  | 8.753  | -7.522  | 1.00 | 0.00 |
| ATOM | 1570 | C   | LYS | 99  | 0.594  | 6.355  | -9.457  | 1.00 | 0.00 |
| ATOM | 1571 | O   | LYS | 99  | 0.230  | 6.845  | -8.407  | 1.00 | 0.00 |
| ATOM | 1572 | N   | ARG | 100 | -0.143 | 6.426  | -10.530 | 1.00 | 0.00 |
| ATOM | 1573 | H   | ARG | 100 | 0.155  | 6.020  | -11.406 | 1.00 | 0.00 |
| ATOM | 1574 | CA  | ARG | 100 | -1.461 | 7.118  | -10.484 | 1.00 | 0.00 |
| ATOM | 1575 | HA  | ARG | 100 | -1.349 | 8.114  | -10.056 | 1.00 | 0.00 |
| ATOM | 1576 | CB  | ARG | 100 | -2.019 | 7.255  | -11.902 | 1.00 | 0.00 |
| ATOM | 1577 | HB2 | ARG | 100 | -1.837 | 6.334  | -12.456 | 1.00 | 0.00 |
| ATOM | 1578 | HB3 | ARG | 100 | -3.091 | 7.444  | -11.855 | 1.00 | 0.00 |
| ATOM | 1579 | CG  | ARG | 100 | -1.326 | 8.421  | -12.610 | 1.00 | 0.00 |
| ATOM | 1580 | HG2 | ARG | 100 | -1.473 | 9.334  | -12.034 | 1.00 | 0.00 |
| ATOM | 1581 | HG3 | ARG | 100 | -0.259 | 8.212  | -12.694 | 1.00 | 0.00 |
| ATOM | 1582 | CD  | ARG | 100 | -1.923 | 8.598  | -14.008 | 1.00 | 0.00 |
| ATOM | 1583 | HD2 | ARG | 100 | -2.016 | 7.631  | -14.504 | 1.00 | 0.00 |
| ATOM | 1584 | HD3 | ARG | 100 | -2.904 | 9.068  | -13.943 | 1.00 | 0.00 |

|      |      |      |     |     |        |        |         |      |      |
|------|------|------|-----|-----|--------|--------|---------|------|------|
| ATOM | 1585 | NE   | ARG | 100 | -1.029 | 9.469  | -14.823 | 1.00 | 0.00 |
| ATOM | 1586 | HE   | ARG | 100 | -0.123 | 9.150  | -15.136 | 1.00 | 0.00 |
| ATOM | 1587 | CZ   | ARG | 100 | -1.411 | 10.673 | -15.148 | 1.00 | 0.00 |
| ATOM | 1588 | NH1  | ARG | 100 | -0.785 | 11.710 | -14.662 | 1.00 | 0.00 |
| ATOM | 1589 | HH11 | ARG | 100 | -0.005 | 11.576 | -14.034 | 1.00 | 0.00 |
| ATOM | 1590 | HH12 | ARG | 100 | -1.083 | 12.640 | -14.916 | 1.00 | 0.00 |
| ATOM | 1591 | NH2  | ARG | 100 | -2.419 | 10.841 | -15.959 | 1.00 | 0.00 |
| ATOM | 1592 | HH21 | ARG | 100 | -2.901 | 10.036 | -16.334 | 1.00 | 0.00 |
| ATOM | 1593 | HH22 | ARG | 100 | -2.712 | 11.774 | -16.209 | 1.00 | 0.00 |
| ATOM | 1594 | C    | ARG | 100 | -2.425 | 6.296  | -9.630  | 1.00 | 0.00 |
| ATOM | 1595 | O    | ARG | 100 | -3.026 | 6.795  | -8.699  | 1.00 | 0.00 |
| ATOM | 1596 | N    | GLU | 101 | -2.569 | 5.033  | -9.929  | 1.00 | 0.00 |
| ATOM | 1597 | H    | GLU | 101 | -2.070 | 4.607  | -10.697 | 1.00 | 0.00 |
| ATOM | 1598 | CA   | GLU | 101 | -3.484 | 4.179  | -9.123  | 1.00 | 0.00 |
| ATOM | 1599 | HA   | GLU | 101 | -4.498 | 4.575  | -9.158  | 1.00 | 0.00 |
| ATOM | 1600 | CB   | GLU | 101 | -3.494 | 2.759  | -9.692  | 1.00 | 0.00 |
| ATOM | 1601 | HB2  | GLU | 101 | -2.473 | 2.379  | -9.739  | 1.00 | 0.00 |
| ATOM | 1602 | HB3  | GLU | 101 | -4.091 | 2.114  | -9.048  | 1.00 | 0.00 |
| ATOM | 1603 | CG   | GLU | 101 | -4.097 | 2.774  | -11.098 | 1.00 | 0.00 |
| ATOM | 1604 | HG2  | GLU | 101 | -3.426 | 3.302  | -11.775 | 1.00 | 0.00 |
| ATOM | 1605 | HG3  | GLU | 101 | -4.233 | 1.750  | -11.448 | 1.00 | 0.00 |
| ATOM | 1606 | CD   | GLU | 101 | -5.451 | 3.486  | -11.064 | 1.00 | 0.00 |

|      |      |      |     |     |        |       |         |      |      |
|------|------|------|-----|-----|--------|-------|---------|------|------|
| ATOM | 1607 | OE1  | GLU | 101 | -6.161 | 3.322 | -10.086 | 1.00 | 0.00 |
| ATOM | 1608 | OE2  | GLU | 101 | -5.756 | 4.183 | -12.019 | 1.00 | 0.00 |
| ATOM | 1609 | C    | GLU | 101 | -2.982 | 4.148 | -7.681  | 1.00 | 0.00 |
| ATOM | 1610 | O    | GLU | 101 | -3.751 | 4.164 | -6.740  | 1.00 | 0.00 |
| ATOM | 1611 | N    | LEU | 102 | -1.689 | 4.105 | -7.502  | 1.00 | 0.00 |
| ATOM | 1612 | H    | LEU | 102 | -1.047 | 4.089 | -8.282  | 1.00 | 0.00 |
| ATOM | 1613 | CA   | LEU | 102 | -1.126 | 4.076 | -6.125  | 1.00 | 0.00 |
| ATOM | 1614 | HA   | LEU | 102 | -1.429 | 3.164 | -5.611  | 1.00 | 0.00 |
| ATOM | 1615 | CB   | LEU | 102 | 0.402  | 4.110 | -6.200  | 1.00 | 0.00 |
| ATOM | 1616 | HB2  | LEU | 102 | 0.715  | 4.052 | -7.243  | 1.00 | 0.00 |
| ATOM | 1617 | HB3  | LEU | 102 | 0.765  | 5.040 | -5.764  | 1.00 | 0.00 |
| ATOM | 1618 | CG   | LEU | 102 | 0.984  | 2.923 | -5.426  | 1.00 | 0.00 |
| ATOM | 1619 | HG   | LEU | 102 | 0.901  | 3.112 | -4.356  | 1.00 | 0.00 |
| ATOM | 1620 | CD1  | LEU | 102 | 0.213  | 1.649 | -5.780  | 1.00 | 0.00 |
| ATOM | 1621 | HD11 | LEU | 102 | 0.297  | 1.458 | -6.850  | 1.00 | 0.00 |
| ATOM | 1622 | HD12 | LEU | 102 | 0.630  | 0.806 | -5.228  | 1.00 | 0.00 |
| ATOM | 1623 | HD13 | LEU | 102 | -0.837 | 1.773 | -5.515  | 1.00 | 0.00 |
| ATOM | 1624 | CD2  | LEU | 102 | 2.457  | 2.746 | -5.800  | 1.00 | 0.00 |
| ATOM | 1625 | HD21 | LEU | 102 | 3.008  | 3.651 | -5.546  | 1.00 | 0.00 |
| ATOM | 1626 | HD22 | LEU | 102 | 2.873  | 1.901 | -5.250  | 1.00 | 0.00 |
| ATOM | 1627 | HD23 | LEU | 102 | 2.541  | 2.558 | -6.871  | 1.00 | 0.00 |
| ATOM | 1628 | C    | LEU | 102 | -1.627 | 5.291 | -5.343  | 1.00 | 0.00 |

|      |      |     |     |     |        |        |        |      |      |
|------|------|-----|-----|-----|--------|--------|--------|------|------|
| ATOM | 1629 | O   | LEU | 102 | -1.916 | 5.207  | -4.168 | 1.00 | 0.00 |
| ATOM | 1630 | N   | MET | 103 | -1.739 | 6.421  | -5.988 | 1.00 | 0.00 |
| ATOM | 1631 | H   | MET | 103 | -1.505 | 6.502  | -6.967 | 1.00 | 0.00 |
| ATOM | 1632 | CA  | MET | 103 | -2.228 | 7.634  | -5.275 | 1.00 | 0.00 |
| ATOM | 1633 | HA  | MET | 103 | -1.595 | 7.846  | -4.413 | 1.00 | 0.00 |
| ATOM | 1634 | CB  | MET | 103 | -2.186 | 8.836  | -6.220 | 1.00 | 0.00 |
| ATOM | 1635 | HB2 | MET | 103 | -2.638 | 8.565  | -7.174 | 1.00 | 0.00 |
| ATOM | 1636 | HB3 | MET | 103 | -2.738 | 9.665  | -5.779 | 1.00 | 0.00 |
| ATOM | 1637 | CG  | MET | 103 | -0.731 | 9.255  | -6.446 | 1.00 | 0.00 |
| ATOM | 1638 | HG2 | MET | 103 | -0.252 | 9.456  | -5.488 | 1.00 | 0.00 |
| ATOM | 1639 | HG3 | MET | 103 | -0.193 | 8.458  | -6.960 | 1.00 | 0.00 |
| ATOM | 1640 | SD  | MET | 103 | -0.686 | 10.754 | -7.460 | 1.00 | 0.00 |
| ATOM | 1641 | CE  | MET | 103 | -0.945 | 11.942 | -6.121 | 1.00 | 0.00 |
| ATOM | 1642 | HE1 | MET | 103 | -0.139 | 11.850 | -5.392 | 1.00 | 0.00 |
| ATOM | 1643 | HE2 | MET | 103 | -0.952 | 12.953 | -6.528 | 1.00 | 0.00 |
| ATOM | 1644 | HE3 | MET | 103 | -1.899 | 11.739 | -5.634 | 1.00 | 0.00 |
| ATOM | 1645 | C   | MET | 103 | -3.667 | 7.396  | -4.815 | 1.00 | 0.00 |
| ATOM | 1646 | O   | MET | 103 | -4.096 | 7.899  | -3.796 | 1.00 | 0.00 |
| ATOM | 1647 | N   | SER | 104 | -4.414 | 6.626  | -5.559 | 1.00 | 0.00 |
| ATOM | 1648 | H   | SER | 104 | -4.061 | 6.204  | -6.406 | 1.00 | 0.00 |
| ATOM | 1649 | CA  | SER | 104 | -5.823 | 6.349  | -5.167 | 1.00 | 0.00 |
| ATOM | 1650 | HA  | SER | 104 | -6.287 | 7.248  | -4.764 | 1.00 | 0.00 |

|      |      |      |     |     |        |        |        |      |      |
|------|------|------|-----|-----|--------|--------|--------|------|------|
| ATOM | 1651 | CB   | SER | 104 | -6.615 | 5.899  | -6.396 | 1.00 | 0.00 |
| ATOM | 1652 | HB2  | SER | 104 | -7.656 | 5.736  | -6.119 | 1.00 | 0.00 |
| ATOM | 1653 | HB3  | SER | 104 | -6.560 | 6.668  | -7.166 | 1.00 | 0.00 |
| ATOM | 1654 | OG   | SER | 104 | -6.064 | 4.689  | -6.896 | 1.00 | 0.00 |
| ATOM | 1655 | HG   | SER | 104 | -6.560 | 4.406  | -7.667 | 1.00 | 0.00 |
| ATOM | 1656 | C    | SER | 104 | -5.847 | 5.242  | -4.111 | 1.00 | 0.00 |
| ATOM | 1657 | O    | SER | 104 | -6.705 | 5.208  | -3.252 | 1.00 | 0.00 |
| ATOM | 1658 | N    | LEU | 105 | -4.913 | 4.332  | -4.172 | 1.00 | 0.00 |
| ATOM | 1659 | H    | LEU | 105 | -4.202 | 4.352  | -4.889 | 1.00 | 0.00 |
| ATOM | 1660 | CA   | LEU | 105 | -4.881 | 3.224  | -3.177 | 1.00 | 0.00 |
| ATOM | 1661 | HA   | LEU | 105 | -5.629 | 2.471  | -3.426 | 1.00 | 0.00 |
| ATOM | 1662 | CB   | LEU | 105 | -3.500 | 2.563  | -3.189 | 1.00 | 0.00 |
| ATOM | 1663 | HB2  | LEU | 105 | -2.838 | 3.127  | -3.846 | 1.00 | 0.00 |
| ATOM | 1664 | HB3  | LEU | 105 | -3.090 | 2.557  | -2.179 | 1.00 | 0.00 |
| ATOM | 1665 | CG   | LEU | 105 | -3.620 | 1.124  | -3.699 | 1.00 | 0.00 |
| ATOM | 1666 | HG   | LEU | 105 | -2.682 | 0.597  | -3.522 | 1.00 | 0.00 |
| ATOM | 1667 | CD1  | LEU | 105 | -4.754 | 0.408  | -2.961 | 1.00 | 0.00 |
| ATOM | 1668 | HD11 | LEU | 105 | -5.692 | 0.933  | -3.139 | 1.00 | 0.00 |
| ATOM | 1669 | HD12 | LEU | 105 | -4.836 | -0.616 | -3.326 | 1.00 | 0.00 |
| ATOM | 1670 | HD13 | LEU | 105 | -4.541 | 0.395  | -1.892 | 1.00 | 0.00 |
| ATOM | 1671 | CD2  | LEU | 105 | -3.916 | 1.138  | -5.199 | 1.00 | 0.00 |
| ATOM | 1672 | HD21 | LEU | 105 | -3.106 | 1.643  | -5.725 | 1.00 | 0.00 |

|      |      |      |     |     |        |       |        |      |      |
|------|------|------|-----|-----|--------|-------|--------|------|------|
| ATOM | 1673 | HD22 | LEU | 105 | -4.001 | 0.114 | -5.563 | 1.00 | 0.00 |
| ATOM | 1674 | HD23 | LEU | 105 | -4.852 | 1.666 | -5.380 | 1.00 | 0.00 |
| ATOM | 1675 | C    | LEU | 105 | -5.173 | 3.769 | -1.777 | 1.00 | 0.00 |
| ATOM | 1676 | O    | LEU | 105 | -6.016 | 3.254 | -1.070 | 1.00 | 0.00 |
| ATOM | 1677 | N    | PRO | 106 | -4.465 | 4.835 | -1.366 | 1.00 | 0.00 |
| ATOM | 1678 | CD   | PRO | 106 | -3.429 | 5.533 | -2.148 | 1.00 | 0.00 |
| ATOM | 1679 | HD2  | PRO | 106 | -3.779 | 5.686 | -3.169 | 1.00 | 0.00 |
| ATOM | 1680 | HD3  | PRO | 106 | -2.516 | 4.937 | -2.164 | 1.00 | 0.00 |
| ATOM | 1681 | CG   | PRO | 106 | -3.258 | 6.823 | -1.396 | 1.00 | 0.00 |
| ATOM | 1682 | HG2  | PRO | 106 | -3.945 | 7.571 | -1.792 | 1.00 | 0.00 |
| ATOM | 1683 | HG3  | PRO | 106 | -2.233 | 7.177 | -1.506 | 1.00 | 0.00 |
| ATOM | 1684 | CB   | PRO | 106 | -3.561 | 6.505 | 0.027  | 1.00 | 0.00 |
| ATOM | 1685 | HB2  | PRO | 106 | -3.947 | 7.407 | 0.501  | 1.00 | 0.00 |
| ATOM | 1686 | HB3  | PRO | 106 | -2.716 | 6.125 | 0.603  | 1.00 | 0.00 |
| ATOM | 1687 | CA   | PRO | 106 | -4.660 | 5.445 | -0.047 | 1.00 | 0.00 |
| ATOM | 1688 | HA   | PRO | 106 | -4.562 | 4.670 | 0.713  | 1.00 | 0.00 |
| ATOM | 1689 | C    | PRO | 106 | -6.039 | 6.094 | 0.063  | 1.00 | 0.00 |
| ATOM | 1690 | O    | PRO | 106 | -6.444 | 6.553 | 1.113  | 1.00 | 0.00 |
| ATOM | 1691 | N    | GLN | 107 | -6.768 | 6.124 | -1.018 | 1.00 | 0.00 |
| ATOM | 1692 | H    | GLN | 107 | -6.431 | 5.742 | -1.891 | 1.00 | 0.00 |
| ATOM | 1693 | CA   | GLN | 107 | -8.126 | 6.728 | -0.990 | 1.00 | 0.00 |
| ATOM | 1694 | HA   | GLN | 107 | -8.226 | 7.390 | -0.130 | 1.00 | 0.00 |

|      |      |      |     |     |         |        |        |      |      |
|------|------|------|-----|-----|---------|--------|--------|------|------|
| ATOM | 1695 | CB   | GLN | 107 | -8.352  | 7.544  | -2.264 | 1.00 | 0.00 |
| ATOM | 1696 | HB2  | GLN | 107 | -7.569  | 8.296  | -2.358 | 1.00 | 0.00 |
| ATOM | 1697 | HB3  | GLN | 107 | -8.324  | 6.882  | -3.130 | 1.00 | 0.00 |
| ATOM | 1698 | CG   | GLN | 107 | -9.716  | 8.234  | -2.193 | 1.00 | 0.00 |
| ATOM | 1699 | HG2  | GLN | 107 | -10.508 | 7.493  | -2.083 | 1.00 | 0.00 |
| ATOM | 1700 | HG3  | GLN | 107 | -9.747  | 8.925  | -1.351 | 1.00 | 0.00 |
| ATOM | 1701 | CD   | GLN | 107 | -9.958  | 9.021  | -3.482 | 1.00 | 0.00 |
| ATOM | 1702 | OE1  | GLN | 107 | -9.071  | 9.153  | -4.303 | 1.00 | 0.00 |
| ATOM | 1703 | NE2  | GLN | 107 | -11.129 | 9.555  | -3.697 | 1.00 | 0.00 |
| ATOM | 1704 | HE21 | GLN | 107 | -11.295 | 10.075 | -4.546 | 1.00 | 0.00 |
| ATOM | 1705 | HE22 | GLN | 107 | -11.864 | 9.445  | -3.013 | 1.00 | 0.00 |
| ATOM | 1706 | C    | GLN | 107 | -9.166  | 5.613  | -0.904 | 1.00 | 0.00 |
| ATOM | 1707 | O    | GLN | 107 | -10.069 | 5.652  | -0.093 | 1.00 | 0.00 |
| ATOM | 1708 | N    | GLN | 108 | -9.048  | 4.618  | -1.740 | 1.00 | 0.00 |
| ATOM | 1709 | H    | GLN | 108 | -8.301  | 4.581  | -2.419 | 1.00 | 0.00 |
| ATOM | 1710 | CA   | GLN | 108 | -10.030 | 3.498  | -1.709 | 1.00 | 0.00 |
| ATOM | 1711 | HA   | GLN | 108 | -10.995 | 3.829  | -2.092 | 1.00 | 0.00 |
| ATOM | 1712 | CB   | GLN | 108 | -9.523  | 2.352  | -2.587 | 1.00 | 0.00 |
| ATOM | 1713 | HB2  | GLN | 108 | -9.323  | 2.724  | -3.592 | 1.00 | 0.00 |
| ATOM | 1714 | HB3  | GLN | 108 | -8.605  | 1.946  | -2.161 | 1.00 | 0.00 |
| ATOM | 1715 | CG   | GLN | 108 | -10.584 | 1.252  | -2.653 | 1.00 | 0.00 |
| ATOM | 1716 | HG2  | GLN | 108 | -10.864 | 0.933  | -1.649 | 1.00 | 0.00 |



|      |      |      |     |     |         |        |        |      |      |
|------|------|------|-----|-----|---------|--------|--------|------|------|
| ATOM | 1717 | HG3  | GLN | 108 | -11.468 | 1.611  | -3.180 | 1.00 | 0.00 |
| ATOM | 1718 | CD   | GLN | 108 | -10.020 | 0.047  | -3.409 | 1.00 | 0.00 |
| ATOM | 1719 | OE1  | GLN | 108 | -9.111  | -0.608 | -2.941 | 1.00 | 0.00 |
| ATOM | 1720 | NE2  | GLN | 108 | -10.527 | -0.276 | -4.568 | 1.00 | 0.00 |
| ATOM | 1721 | HE21 | GLN | 108 | -10.160 | -1.071 | -5.073 | 1.00 | 0.00 |
| ATOM | 1722 | HE22 | GLN | 108 | -11.284 | 0.269  | -4.954 | 1.00 | 0.00 |
| ATOM | 1723 | C    | GLN | 108 | -10.197 | 3.004  | -0.272 | 1.00 | 0.00 |
| ATOM | 1724 | O    | GLN | 108 | -11.241 | 2.513  | 0.110  | 1.00 | 0.00 |
| ATOM | 1725 | N    | CYX | 109 | -9.176  | 3.130  | 0.530  | 1.00 | 0.00 |
| ATOM | 1726 | H    | CYX | 109 | -8.304  | 3.535  | 0.220  | 1.00 | 0.00 |
| ATOM | 1727 | CA   | CYX | 109 | -9.276  | 2.667  | 1.943  | 1.00 | 0.00 |
| ATOM | 1728 | HA   | CYX | 109 | -10.319 | 2.503  | 2.213  | 1.00 | 0.00 |
| ATOM | 1729 | CB   | CYX | 109 | -8.515  | 1.347  | 2.109  | 1.00 | 0.00 |
| ATOM | 1730 | HB2  | CYX | 109 | -8.067  | 1.307  | 3.102  | 1.00 | 0.00 |
| ATOM | 1731 | HB3  | CYX | 109 | -9.204  | 0.511  | 1.988  | 1.00 | 0.00 |
| ATOM | 1732 | SG   | CYX | 109 | -7.173  | 1.254  | 0.895  | 1.00 | 0.00 |
| ATOM | 1733 | C    | CYX | 109 | -8.671  | 3.726  | 2.869  | 1.00 | 0.00 |
| ATOM | 1734 | O    | CYX | 109 | -8.201  | 3.423  | 3.948  | 1.00 | 0.00 |
| ATOM | 1735 | N    | ASN | 110 | -8.683  | 4.963  | 2.456  | 1.00 | 0.00 |
| ATOM | 1736 | H    | ASN | 110 | -9.073  | 5.218  | 1.560  | 1.00 | 0.00 |
| ATOM | 1737 | CA   | ASN | 110 | -8.112  | 6.042  | 3.311  | 1.00 | 0.00 |
| ATOM | 1738 | HA   | ASN | 110 | -7.924  | 6.936  | 2.716  | 1.00 | 0.00 |

|      |      |      |     |     |         |        |       |      |      |
|------|------|------|-----|-----|---------|--------|-------|------|------|
| ATOM | 1739 | CB   | ASN | 110 | -9.105  | 6.393  | 4.421 | 1.00 | 0.00 |
| ATOM | 1740 | HB2  | ASN | 110 | -9.201  | 5.560  | 5.118 | 1.00 | 0.00 |
| ATOM | 1741 | HB3  | ASN | 110 | -8.772  | 7.280  | 4.959 | 1.00 | 0.00 |
| ATOM | 1742 | CG   | ASN | 110 | -10.477 | 6.679  | 3.808 | 1.00 | 0.00 |
| ATOM | 1743 | OD1  | ASN | 110 | -10.583 | 7.404  | 2.839 | 1.00 | 0.00 |
| ATOM | 1744 | ND2  | ASN | 110 | -11.540 | 6.136  | 4.336 | 1.00 | 0.00 |
| ATOM | 1745 | HD21 | ASN | 110 | -12.449 | 6.320  | 3.936 | 1.00 | 0.00 |
| ATOM | 1746 | HD22 | ASN | 110 | -11.448 | 5.533  | 5.142 | 1.00 | 0.00 |
| ATOM | 1747 | C    | ASN | 110 | -6.801  | 5.562  | 3.935 | 1.00 | 0.00 |
| ATOM | 1748 | O    | ASN | 110 | -6.561  | 5.740  | 5.113 | 1.00 | 0.00 |
| ATOM | 1749 | N    | PHE | 111 | -5.948  | 4.953  | 3.155 | 1.00 | 0.00 |
| ATOM | 1750 | H    | PHE | 111 | -6.138  | 4.796  | 2.175 | 1.00 | 0.00 |
| ATOM | 1751 | CA   | PHE | 111 | -4.654  | 4.466  | 3.709 | 1.00 | 0.00 |
| ATOM | 1752 | HA   | PHE | 111 | -4.824  | 3.899  | 4.624 | 1.00 | 0.00 |
| ATOM | 1753 | CB   | PHE | 111 | -3.973  | 3.553  | 2.688 | 1.00 | 0.00 |
| ATOM | 1754 | HB2  | PHE | 111 | -4.684  | 3.116  | 1.987 | 1.00 | 0.00 |
| ATOM | 1755 | HB3  | PHE | 111 | -3.188  | 4.068  | 2.135 | 1.00 | 0.00 |
| ATOM | 1756 | CG   | PHE | 111 | -3.311  | 2.401  | 3.406 | 1.00 | 0.00 |
| ATOM | 1757 | CD1  | PHE | 111 | -4.066  | 1.281  | 3.776 | 1.00 | 0.00 |
| ATOM | 1758 | HD1  | PHE | 111 | -5.130  | 1.239  | 3.545 | 1.00 | 0.00 |
| ATOM | 1759 | CE1  | PHE | 111 | -3.452  | 0.214  | 4.443 | 1.00 | 0.00 |
| ATOM | 1760 | HE1  | PHE | 111 | -4.040  | -0.657 | 4.733 | 1.00 | 0.00 |

|      |      |     |     |     |        |        |       |      |      |
|------|------|-----|-----|-----|--------|--------|-------|------|------|
| ATOM | 1761 | CZ  | PHE | 111 | -2.084 | 0.265  | 4.738 | 1.00 | 0.00 |
| ATOM | 1762 | HZ  | PHE | 111 | -1.606 | -0.567 | 5.256 | 1.00 | 0.00 |
| ATOM | 1763 | CE2 | PHE | 111 | -1.330 | 1.385  | 4.367 | 1.00 | 0.00 |
| ATOM | 1764 | HE2 | PHE | 111 | -0.265 | 1.426  | 4.597 | 1.00 | 0.00 |
| ATOM | 1765 | CD2 | PHE | 111 | -1.944 | 2.452  | 3.701 | 1.00 | 0.00 |
| ATOM | 1766 | HD2 | PHE | 111 | -1.357 | 3.323  | 3.412 | 1.00 | 0.00 |
| ATOM | 1767 | C   | PHE | 111 | -3.747 | 5.659  | 4.013 | 1.00 | 0.00 |
| ATOM | 1768 | O   | PHE | 111 | -2.661 | 5.508  | 4.535 | 1.00 | 0.00 |
| ATOM | 1769 | N   | ARG | 112 | -4.184 | 6.847  | 3.692 | 1.00 | 0.00 |
| ATOM | 1770 | H   | ARG | 112 | -5.086 | 6.982  | 3.259 | 1.00 | 0.00 |
| ATOM | 1771 | CA  | ARG | 112 | -3.344 | 8.047  | 3.966 | 1.00 | 0.00 |
| ATOM | 1772 | HA  | ARG | 112 | -2.493 | 8.076  | 3.285 | 1.00 | 0.00 |
| ATOM | 1773 | CB  | ARG | 112 | -4.179 | 9.313  | 3.760 | 1.00 | 0.00 |
| ATOM | 1774 | HB2 | ARG | 112 | -5.064 | 9.272  | 4.395 | 1.00 | 0.00 |
| ATOM | 1775 | HB3 | ARG | 112 | -3.584 | 10.187 | 4.023 | 1.00 | 0.00 |
| ATOM | 1776 | CG  | ARG | 112 | -4.607 | 9.409  | 2.293 | 1.00 | 0.00 |
| ATOM | 1777 | HG2 | ARG | 112 | -3.725 | 9.376  | 1.653 | 1.00 | 0.00 |
| ATOM | 1778 | HG3 | ARG | 112 | -5.263 | 8.573  | 2.049 | 1.00 | 0.00 |
| ATOM | 1779 | CD  | ARG | 112 | -5.353 | 10.725 | 2.066 | 1.00 | 0.00 |
| ATOM | 1780 | HD2 | ARG | 112 | -4.704 | 11.570 | 2.295 | 1.00 | 0.00 |
| ATOM | 1781 | HD3 | ARG | 112 | -5.688 | 10.795 | 1.031 | 1.00 | 0.00 |
| ATOM | 1782 | NE  | ARG | 112 | -6.544 | 10.781 | 2.959 | 1.00 | 0.00 |

|      |      |      |     |     |        |        |       |      |      |
|------|------|------|-----|-----|--------|--------|-------|------|------|
| ATOM | 1783 | HE   | ARG | 112 | -7.242 | 10.050 | 2.954 | 1.00 | 0.00 |
| ATOM | 1784 | CZ   | ARG | 112 | -6.704 | 11.790 | 3.772 | 1.00 | 0.00 |
| ATOM | 1785 | NH1  | ARG | 112 | -6.255 | 11.718 | 4.995 | 1.00 | 0.00 |
| ATOM | 1786 | HH11 | ARG | 112 | -5.784 | 10.881 | 5.309 | 1.00 | 0.00 |
| ATOM | 1787 | HH12 | ARG | 112 | -6.380 | 12.499 | 5.622 | 1.00 | 0.00 |
| ATOM | 1788 | NH2  | ARG | 112 | -7.312 | 12.868 | 3.362 | 1.00 | 0.00 |
| ATOM | 1789 | HH21 | ARG | 112 | -7.658 | 12.919 | 2.415 | 1.00 | 0.00 |
| ATOM | 1790 | HH22 | ARG | 112 | -7.434 | 13.646 | 3.994 | 1.00 | 0.00 |
| ATOM | 1791 | C    | ARG | 112 | -2.845 | 7.996  | 5.411 | 1.00 | 0.00 |
| ATOM | 1792 | O    | ARG | 112 | -3.458 | 7.393  | 6.269 | 1.00 | 0.00 |
| ATOM | 1793 | N    | ALA | 113 | -1.735 | 8.626  | 5.689 | 1.00 | 0.00 |
| ATOM | 1794 | H    | ALA | 113 | -1.218 | 9.130  | 4.983 | 1.00 | 0.00 |
| ATOM | 1795 | CA   | ALA | 113 | -1.200 | 8.611  | 7.079 | 1.00 | 0.00 |
| ATOM | 1796 | HA   | ALA | 113 | -1.967 | 8.343  | 7.806 | 1.00 | 0.00 |
| ATOM | 1797 | CB   | ALA | 113 | -0.060 | 7.596  | 7.176 | 1.00 | 0.00 |
| ATOM | 1798 | HB1  | ALA | 113 | 0.720  | 7.855  | 6.460 | 1.00 | 0.00 |
| ATOM | 1799 | HB2  | ALA | 113 | 0.354  | 7.608  | 8.184 | 1.00 | 0.00 |
| ATOM | 1800 | HB3  | ALA | 113 | -0.440 | 6.599  | 6.952 | 1.00 | 0.00 |
| ATOM | 1801 | C    | ALA | 113 | -0.676 | 10.002 | 7.440 | 1.00 | 0.00 |
| ATOM | 1802 | O    | ALA | 113 | -0.456 | 10.834 | 6.582 | 1.00 | 0.00 |
| ATOM | 1803 | N    | PRO | 114 | -0.473 | 10.253 | 8.742 | 1.00 | 0.00 |
| ATOM | 1804 | CD   | PRO | 114 | -0.716 | 9.299  | 9.837 | 1.00 | 0.00 |

|      |      |         |     |        |        |        |      |      |
|------|------|---------|-----|--------|--------|--------|------|------|
| ATOM | 1805 | HD2 PRO | 114 | -0.252 | 8.342  | 9.595  | 1.00 | 0.00 |
| ATOM | 1806 | HD3 PRO | 114 | -1.789 | 9.159  | 9.965  | 1.00 | 0.00 |
| ATOM | 1807 | CG PRO  | 114 | -0.079 | 9.965  | 11.023 | 1.00 | 0.00 |
| ATOM | 1808 | HG2 PRO | 114 | 0.945  | 9.607  | 11.132 | 1.00 | 0.00 |
| ATOM | 1809 | HG3 PRO | 114 | -0.646 | 9.722  | 11.922 | 1.00 | 0.00 |
| ATOM | 1810 | CB PRO  | 114 | -0.117 | 11.431 | 10.748 | 1.00 | 0.00 |
| ATOM | 1811 | HB2 PRO | 114 | 0.741  | 11.892 | 11.237 | 1.00 | 0.00 |
| ATOM | 1812 | HB3 PRO | 114 | -1.030 | 11.929 | 11.072 | 1.00 | 0.00 |
| ATOM | 1813 | CA PRO  | 114 | 0.028  | 11.543 | 9.231  | 1.00 | 0.00 |
| ATOM | 1814 | HA PRO  | 114 | -0.576 | 12.335 | 8.790  | 1.00 | 0.00 |
| ATOM | 1815 | C PRO   | 114 | 1.498  | 11.757 | 8.861  | 1.00 | 0.00 |
| ATOM | 1816 | O PRO   | 114 | 2.028  | 12.843 | 8.984  | 1.00 | 0.00 |
| ATOM | 1817 | N GLN   | 115 | 2.160  | 10.728 | 8.406  | 1.00 | 0.00 |
| ATOM | 1818 | H GLN   | 115 | 1.725  | 9.822  | 8.301  | 1.00 | 0.00 |
| ATOM | 1819 | CA GLN  | 115 | 3.593  | 10.871 | 8.026  | 1.00 | 0.00 |
| ATOM | 1820 | HA GLN  | 115 | 4.008  | 11.785 | 8.450  | 1.00 | 0.00 |
| ATOM | 1821 | CB GLN  | 115 | 4.385  | 9.678  | 8.566  | 1.00 | 0.00 |
| ATOM | 1822 | HB2 GLN | 115 | 4.023  | 8.760  | 8.102  | 1.00 | 0.00 |
| ATOM | 1823 | HB3 GLN | 115 | 5.442  | 9.808  | 8.334  | 1.00 | 0.00 |
| ATOM | 1824 | CG GLN  | 115 | 4.203  | 9.588  | 10.083 | 1.00 | 0.00 |
| ATOM | 1825 | HG2 GLN | 115 | 3.155  | 9.416  | 10.328 | 1.00 | 0.00 |
| ATOM | 1826 | HG3 GLN | 115 | 4.808  | 8.778  | 10.491 | 1.00 | 0.00 |

|      |      |      |     |     |       |        |        |      |      |
|------|------|------|-----|-----|-------|--------|--------|------|------|
| ATOM | 1827 | CD   | GLN | 115 | 4.647 | 10.902 | 10.728 | 1.00 | 0.00 |
| ATOM | 1828 | OE1  | GLN | 115 | 5.742 | 11.371 | 10.485 | 1.00 | 0.00 |
| ATOM | 1829 | NE2  | GLN | 115 | 3.840 | 11.519 | 11.546 | 1.00 | 0.00 |
| ATOM | 1830 | HE21 | GLN | 115 | 4.128 | 12.387 | 11.975 | 1.00 | 0.00 |
| ATOM | 1831 | HE22 | GLN | 115 | 2.932 | 11.125 | 11.746 | 1.00 | 0.00 |
| ATOM | 1832 | C    | GLN | 115 | 3.714 | 10.916 | 6.502  | 1.00 | 0.00 |
| ATOM | 1833 | O    | GLN | 115 | 2.902 | 10.359 | 5.788  | 1.00 | 0.00 |
| ATOM | 1834 | N    | ARG | 116 | 4.720 | 11.573 | 5.996  | 1.00 | 0.00 |
| ATOM | 1835 | H    | ARG | 116 | 5.398 | 12.038 | 6.582  | 1.00 | 0.00 |
| ATOM | 1836 | CA   | ARG | 116 | 4.891 | 11.652 | 4.518  | 1.00 | 0.00 |
| ATOM | 1837 | HA   | ARG | 116 | 4.065 | 11.149 | 4.014  | 1.00 | 0.00 |
| ATOM | 1838 | CB   | ARG | 116 | 4.909 | 13.119 | 4.084  | 1.00 | 0.00 |
| ATOM | 1839 | HB2  | ARG | 116 | 5.717 | 13.640 | 4.597  | 1.00 | 0.00 |
| ATOM | 1840 | HB3  | ARG | 116 | 5.066 | 13.178 | 3.007  | 1.00 | 0.00 |
| ATOM | 1841 | CG   | ARG | 116 | 3.572 | 13.772 | 4.441  | 1.00 | 0.00 |
| ATOM | 1842 | HG2  | ARG | 116 | 2.761 | 13.227 | 3.958  | 1.00 | 0.00 |
| ATOM | 1843 | HG3  | ARG | 116 | 3.433 | 13.747 | 5.522  | 1.00 | 0.00 |
| ATOM | 1844 | CD   | ARG | 116 | 3.569 | 15.224 | 3.959  | 1.00 | 0.00 |
| ATOM | 1845 | HD2  | ARG | 116 | 4.483 | 15.728 | 4.273  | 1.00 | 0.00 |
| ATOM | 1846 | HD3  | ARG | 116 | 3.490 | 15.261 | 2.872  | 1.00 | 0.00 |
| ATOM | 1847 | NE   | ARG | 116 | 2.402 | 15.940 | 4.548  | 1.00 | 0.00 |
| ATOM | 1848 | HE   | ARG | 116 | 2.496 | 16.510 | 5.376  | 1.00 | 0.00 |

|      |      |      |     |     |        |        |        |      |      |
|------|------|------|-----|-----|--------|--------|--------|------|------|
| ATOM | 1849 | CZ   | ARG | 116 | 1.227  | 15.840 | 3.991  | 1.00 | 0.00 |
| ATOM | 1850 | NH1  | ARG | 116 | 1.010  | 14.928 | 3.083  | 1.00 | 0.00 |
| ATOM | 1851 | HH11 | ARG | 116 | 1.755  | 14.300 | 2.814  | 1.00 | 0.00 |
| ATOM | 1852 | HH12 | ARG | 116 | 0.099  | 14.853 | 2.654  | 1.00 | 0.00 |
| ATOM | 1853 | NH2  | ARG | 116 | 0.266  | 16.650 | 4.344  | 1.00 | 0.00 |
| ATOM | 1854 | HH21 | ARG | 116 | 0.436  | 17.353 | 5.049  | 1.00 | 0.00 |
| ATOM | 1855 | HH22 | ARG | 116 | -0.642 | 16.569 | 3.911  | 1.00 | 0.00 |
| ATOM | 1856 | C    | ARG | 116 | 6.209  | 10.986 | 4.119  | 1.00 | 0.00 |
| ATOM | 1857 | O    | ARG | 116 | 7.154  | 10.954 | 4.881  | 1.00 | 0.00 |
| ATOM | 1858 | N    | CYX | 117 | 6.279  | 10.451 | 2.931  | 1.00 | 0.00 |
| ATOM | 1859 | H    | CYX | 117 | 5.497  | 10.473 | 2.292  | 1.00 | 0.00 |
| ATOM | 1860 | CA   | CYX | 117 | 7.535  | 9.787  | 2.486  | 1.00 | 0.00 |
| ATOM | 1861 | HA   | CYX | 117 | 8.266  | 9.779  | 3.295  | 1.00 | 0.00 |
| ATOM | 1862 | CB   | CYX | 117 | 7.234  | 8.341  | 2.085  | 1.00 | 0.00 |
| ATOM | 1863 | HB2  | CYX | 117 | 6.461  | 8.329  | 1.317  | 1.00 | 0.00 |
| ATOM | 1864 | HB3  | CYX | 117 | 8.139  | 7.875  | 1.695  | 1.00 | 0.00 |
| ATOM | 1865 | SG   | CYX | 117 | 6.604  | 7.436  | 3.520  | 1.00 | 0.00 |
| ATOM | 1866 | C    | CYX | 117 | 8.111  | 10.538 | 1.284  | 1.00 | 0.00 |
| ATOM | 1867 | O    | CYX | 117 | 7.414  | 11.256 | 0.596  | 1.00 | 0.00 |
| ATOM | 1868 | N    | ASP | 118 | 9.381  | 10.377 | 1.025  | 1.00 | 0.00 |
| ATOM | 1869 | H    | ASP | 118 | 9.968  | 9.782  | 1.592  | 1.00 | 0.00 |
| ATOM | 1870 | CA   | ASP | 118 | 9.999  | 11.082 | -0.133 | 1.00 | 0.00 |

|      |      |      |     |     |        |        |        |      |      |
|------|------|------|-----|-----|--------|--------|--------|------|------|
| ATOM | 1871 | HA   | ASP | 118 | 9.706  | 12.131 | -0.137 | 1.00 | 0.00 |
| ATOM | 1872 | CB   | ASP | 118 | 11.523 | 11.001 | -0.025 | 1.00 | 0.00 |
| ATOM | 1873 | HB2  | ASP | 118 | 11.834 | 9.956  | -0.013 | 1.00 | 0.00 |
| ATOM | 1874 | HB3  | ASP | 118 | 11.974 | 11.503 | -0.881 | 1.00 | 0.00 |
| ATOM | 1875 | CG   | ASP | 118 | 11.980 | 11.683 | 1.266  | 1.00 | 0.00 |
| ATOM | 1876 | OD1  | ASP | 118 | 11.186 | 12.408 | 1.843  | 1.00 | 0.00 |
| ATOM | 1877 | OD2  | ASP | 118 | 13.116 | 11.467 | 1.657  | 1.00 | 0.00 |
| ATOM | 1878 | C    | ASP | 118 | 9.543  | 10.420 | -1.435 | 1.00 | 0.00 |
| ATOM | 1879 | O    | ASP | 118 | 9.330  | 9.226  | -1.493 | 1.00 | 0.00 |
| ATOM | 1880 | N    | LEU | 119 | 9.389  | 11.188 | -2.479 | 1.00 | 0.00 |
| ATOM | 1881 | H    | LEU | 119 | 9.564  | 12.181 | -2.438 | 1.00 | 0.00 |
| ATOM | 1882 | CA   | LEU | 119 | 8.944  | 10.602 | -3.774 | 1.00 | 0.00 |
| ATOM | 1883 | HA   | LEU | 119 | 8.132  | 9.894  | -3.610 | 1.00 | 0.00 |
| ATOM | 1884 | CB   | LEU | 119 | 8.442  | 11.719 | -4.691 | 1.00 | 0.00 |
| ATOM | 1885 | HB2  | LEU | 119 | 9.143  | 12.553 | -4.664 | 1.00 | 0.00 |
| ATOM | 1886 | HB3  | LEU | 119 | 8.361  | 11.345 | -5.712 | 1.00 | 0.00 |
| ATOM | 1887 | CG   | LEU | 119 | 7.068  | 12.192 | -4.211 | 1.00 | 0.00 |
| ATOM | 1888 | HG   | LEU | 119 | 6.461  | 11.328 | -3.939 | 1.00 | 0.00 |
| ATOM | 1889 | CD1  | LEU | 119 | 7.239  | 13.100 | -2.992 | 1.00 | 0.00 |
| ATOM | 1890 | HD11 | LEU | 119 | 7.846  | 13.963 | -3.264 | 1.00 | 0.00 |
| ATOM | 1891 | HD12 | LEU | 119 | 6.261  | 13.437 | -2.650 | 1.00 | 0.00 |
| ATOM | 1892 | HD13 | LEU | 119 | 7.733  | 12.547 | -2.193 | 1.00 | 0.00 |



|      |      |      |     |     |        |        |        |      |      |
|------|------|------|-----|-----|--------|--------|--------|------|------|
| ATOM | 1893 | CD2  | LEU | 119 | 6.373  | 12.967 | -5.332 | 1.00 | 0.00 |
| ATOM | 1894 | HD21 | LEU | 119 | 6.251  | 12.319 | -6.200 | 1.00 | 0.00 |
| ATOM | 1895 | HD22 | LEU | 119 | 5.395  | 13.303 | -4.989 | 1.00 | 0.00 |
| ATOM | 1896 | HD23 | LEU | 119 | 6.978  | 13.831 | -5.606 | 1.00 | 0.00 |
| ATOM | 1897 | C    | LEU | 119 | 10.118 | 9.883  | -4.442 | 1.00 | 0.00 |
| ATOM | 1898 | O    | LEU | 119 | 9.937  | 9.037  | -5.294 | 1.00 | 0.00 |
| ATOM | 1899 | N    | ASP | 120 | 11.323 | 10.211 | -4.060 | 1.00 | 0.00 |
| ATOM | 1900 | H    | ASP | 120 | 11.484 | 10.914 | -3.353 | 1.00 | 0.00 |
| ATOM | 1901 | CA   | ASP | 120 | 12.505 | 9.543  | -4.674 | 1.00 | 0.00 |
| ATOM | 1902 | HA   | ASP | 120 | 12.449 | 9.600  | -5.761 | 1.00 | 0.00 |
| ATOM | 1903 | CB   | ASP | 120 | 13.785 | 10.243 | -4.213 | 1.00 | 0.00 |
| ATOM | 1904 | HB2  | ASP | 120 | 14.648 | 9.771  | -4.683 | 1.00 | 0.00 |
| ATOM | 1905 | HB3  | ASP | 120 | 13.747 | 11.294 | -4.497 | 1.00 | 0.00 |
| ATOM | 1906 | CG   | ASP | 120 | 13.907 | 10.130 | -2.692 | 1.00 | 0.00 |
| ATOM | 1907 | OD1  | ASP | 120 | 12.897 | 9.886  | -2.052 | 1.00 | 0.00 |
| ATOM | 1908 | OD2  | ASP | 120 | 15.009 | 10.289 | -2.193 | 1.00 | 0.00 |
| ATOM | 1909 | C    | ASP | 120 | 12.542 | 8.075  | -4.245 | 1.00 | 0.00 |
| ATOM | 1910 | O    | ASP | 120 | 13.001 | 7.217  | -4.972 | 1.00 | 0.00 |
| ATOM | 1911 | N    | VAL | 121 | 12.064 | 7.780  | -3.067 | 1.00 | 0.00 |
| ATOM | 1912 | H    | VAL | 121 | 11.682 | 8.487  | -2.457 | 1.00 | 0.00 |
| ATOM | 1913 | CA   | VAL | 121 | 12.073 | 6.367  | -2.592 | 1.00 | 0.00 |
| ATOM | 1914 | HA   | VAL | 121 | 13.098 | 6.014  | -2.472 | 1.00 | 0.00 |

|      |      |      |     |     |        |       |        |      |      |
|------|------|------|-----|-----|--------|-------|--------|------|------|
| ATOM | 1915 | CB   | VAL | 121 | 11.365 | 6.281 | -1.238 | 1.00 | 0.00 |
| ATOM | 1916 | HB   | VAL | 121 | 10.404 | 6.791 | -1.297 | 1.00 | 0.00 |
| ATOM | 1917 | CG1  | VAL | 121 | 11.140 | 4.812 | -0.872 | 1.00 | 0.00 |
| ATOM | 1918 | HG11 | VAL | 121 | 12.101 | 4.300 | -0.812 | 1.00 | 0.00 |
| ATOM | 1919 | HG12 | VAL | 121 | 10.636 | 4.750 | 0.092  | 1.00 | 0.00 |
| ATOM | 1920 | HG13 | VAL | 121 | 10.523 | 4.337 | -1.635 | 1.00 | 0.00 |
| ATOM | 1921 | CG2  | VAL | 121 | 12.232 | 6.946 | -0.167 | 1.00 | 0.00 |
| ATOM | 1922 | HG21 | VAL | 121 | 12.393 | 7.992 | -0.427 | 1.00 | 0.00 |
| ATOM | 1923 | HG22 | VAL | 121 | 11.729 | 6.885 | 0.798  | 1.00 | 0.00 |
| ATOM | 1924 | HG23 | VAL | 121 | 13.193 | 6.434 | -0.108 | 1.00 | 0.00 |
| ATOM | 1925 | C    | VAL | 121 | 11.343 | 5.483 | -3.606 | 1.00 | 0.00 |
| ATOM | 1926 | O    | VAL | 121 | 11.816 | 4.428 | -3.978 | 1.00 | 0.00 |
| ATOM | 1927 | N    | SER | 122 | 10.195 | 5.906 | -4.057 | 1.00 | 0.00 |
| ATOM | 1928 | H    | SER | 122 | 9.796  | 6.782 | -3.752 | 1.00 | 0.00 |
| ATOM | 1929 | CA   | SER | 122 | 9.436  | 5.090 | -5.047 | 1.00 | 0.00 |
| ATOM | 1930 | HA   | SER | 122 | 9.178  | 4.121 | -4.619 | 1.00 | 0.00 |
| ATOM | 1931 | CB   | SER | 122 | 8.144  | 5.817 | -5.426 | 1.00 | 0.00 |
| ATOM | 1932 | HB2  | SER | 122 | 8.387  | 6.748 | -5.938 | 1.00 | 0.00 |
| ATOM | 1933 | HB3  | SER | 122 | 7.551  | 5.184 | -6.086 | 1.00 | 0.00 |
| ATOM | 1934 | OG   | SER | 122 | 7.400  | 6.103 | -4.251 | 1.00 | 0.00 |
| ATOM | 1935 | HG   | SER | 122 | 6.590  | 6.559 | -4.489 | 1.00 | 0.00 |
| ATOM | 1936 | C    | SER | 122 | 10.290 | 4.882 | -6.299 | 1.00 | 0.00 |

|      |      |     |     |     |        |        |        |      |      |
|------|------|-----|-----|-----|--------|--------|--------|------|------|
| ATOM | 1937 | O   | SER | 122 | 10.238 | 3.848  | -6.934 | 1.00 | 0.00 |
| ATOM | 1938 | N   | GLY | 123 | 11.077 | 5.859  | -6.661 | 1.00 | 0.00 |
| ATOM | 1939 | H   | GLY | 123 | 11.126 | 6.722  | -6.139 | 1.00 | 0.00 |
| ATOM | 1940 | CA  | GLY | 123 | 11.933 | 5.716  | -7.872 | 1.00 | 0.00 |
| ATOM | 1941 | HA2 | GLY | 123 | 11.443 | 5.068  | -8.599 | 1.00 | 0.00 |
| ATOM | 1942 | HA3 | GLY | 123 | 12.111 | 6.694  | -8.319 | 1.00 | 0.00 |
| ATOM | 1943 | C   | GLY | 123 | 13.275 | 5.097  | -7.479 | 1.00 | 0.00 |
| ATOM | 1944 | O   | GLY | 123 | 14.220 | 5.100  | -8.243 | 1.00 | 0.00 |
| ATOM | 1945 | N   | GLY | 124 | 13.367 | 4.562  | -6.291 | 1.00 | 0.00 |
| ATOM | 1946 | H   | GLY | 124 | 12.587 | 4.554  | -5.650 | 1.00 | 0.00 |
| ATOM | 1947 | CA  | GLY | 124 | 14.648 | 3.942  | -5.851 | 1.00 | 0.00 |
| ATOM | 1948 | HA2 | GLY | 124 | 15.456 | 4.671  | -5.915 | 1.00 | 0.00 |
| ATOM | 1949 | HA3 | GLY | 124 | 14.557 | 3.589  | -4.823 | 1.00 | 0.00 |
| ATOM | 1950 | C   | GLY | 124 | 14.978 | 2.754  | -6.757 | 1.00 | 0.00 |
| ATOM | 1951 | O   | GLY | 124 | 14.989 | 2.867  | -7.966 | 1.00 | 0.00 |
| ATOM | 1952 | N   | ARG | 125 | 15.247 | 1.613  | -6.181 | 1.00 | 0.00 |
| ATOM | 1953 | H   | ARG | 125 | 15.240 | 1.509  | -5.176 | 1.00 | 0.00 |
| ATOM | 1954 | CA  | ARG | 125 | 15.574 | 0.420  | -7.011 | 1.00 | 0.00 |
| ATOM | 1955 | HA  | ARG | 125 | 16.448 | 0.618  | -7.632 | 1.00 | 0.00 |
| ATOM | 1956 | CB  | ARG | 125 | 15.884 | -0.768 | -6.096 | 1.00 | 0.00 |
| ATOM | 1957 | HB2 | ARG | 125 | 15.059 | -0.917 | -5.400 | 1.00 | 0.00 |
| ATOM | 1958 | HB3 | ARG | 125 | 16.017 | -1.667 | -6.698 | 1.00 | 0.00 |

|      |      |      |     |     |        |        |        |      |      |
|------|------|------|-----|-----|--------|--------|--------|------|------|
| ATOM | 1959 | CG   | ARG | 125 | 17.167 | -0.485 | -5.313 | 1.00 | 0.00 |
| ATOM | 1960 | HG2  | ARG | 125 | 17.966 | -0.222 | -6.006 | 1.00 | 0.00 |
| ATOM | 1961 | HG3  | ARG | 125 | 16.998 | 0.342  | -4.624 | 1.00 | 0.00 |
| ATOM | 1962 | CD   | ARG | 125 | 17.568 | -1.733 | -4.523 | 1.00 | 0.00 |
| ATOM | 1963 | HD2  | ARG | 125 | 16.715 | -2.118 | -3.965 | 1.00 | 0.00 |
| ATOM | 1964 | HD3  | ARG | 125 | 17.938 | -2.505 | -5.198 | 1.00 | 0.00 |
| ATOM | 1965 | NE   | ARG | 125 | 18.650 | -1.383 | -3.560 | 1.00 | 0.00 |
| ATOM | 1966 | HE   | ARG | 125 | 18.584 | -0.571 | -2.963 | 1.00 | 0.00 |
| ATOM | 1967 | CZ   | ARG | 125 | 19.714 | -2.133 | -3.474 | 1.00 | 0.00 |
| ATOM | 1968 | NH1  | ARG | 125 | 20.316 | -2.539 | -4.559 | 1.00 | 0.00 |
| ATOM | 1969 | HH11 | ARG | 125 | 19.956 | -2.271 | -5.464 | 1.00 | 0.00 |
| ATOM | 1970 | HH12 | ARG | 125 | 21.140 | -3.120 | -4.489 | 1.00 | 0.00 |
| ATOM | 1971 | NH2  | ARG | 125 | 20.177 | -2.478 | -2.304 | 1.00 | 0.00 |
| ATOM | 1972 | HH21 | ARG | 125 | 19.710 | -2.163 | -1.466 | 1.00 | 0.00 |
| ATOM | 1973 | HH22 | ARG | 125 | 21.001 | -3.059 | -2.242 | 1.00 | 0.00 |
| ATOM | 1974 | C    | ARG | 125 | 14.379 | 0.078  | -7.903 | 1.00 | 0.00 |
| ATOM | 1975 | O    | ARG | 125 | 14.535 | -0.409 | -9.007 | 1.00 | 0.00 |
| ATOM | 1976 | N    | CYX | 126 | 13.188 | 0.329  | -7.437 | 1.00 | 0.00 |
| ATOM | 1977 | H    | CYX | 126 | 13.052 | 0.733  | -6.522 | 1.00 | 0.00 |
| ATOM | 1978 | CA   | CYX | 126 | 11.984 | 0.019  | -8.259 | 1.00 | 0.00 |
| ATOM | 1979 | HA   | CYX | 126 | 11.961 | -1.041 | -8.512 | 1.00 | 0.00 |
| ATOM | 1980 | CB   | CYX | 126 | 10.723 | 0.359  | -7.463 | 1.00 | 0.00 |

|      |      |     |     |     |        |         |         |      |      |
|------|------|-----|-----|-----|--------|---------|---------|------|------|
| ATOM | 1981 | HB2 | CYX | 126 | 10.788 | 1.384   | -7.100  | 1.00 | 0.00 |
| ATOM | 1982 | HB3 | CYX | 126 | 9.849  | 0.255   | -8.105  | 1.00 | 0.00 |
| ATOM | 1983 | SG  | CYX | 126 | 10.607 | -0.730  | -6.023  | 1.00 | 0.00 |
| ATOM | 1984 | C   | CYX | 126 | 12.018 | 0.851   | -9.543  | 1.00 | 0.00 |
| ATOM | 1985 | O   | CYX | 126 | 11.412 | 0.501   | -10.537 | 1.00 | 0.00 |
| ATOM | 1986 | N   | SER | 127 | 12.723 | 1.948   | -9.531  | 1.00 | 0.00 |
| ATOM | 1987 | H   | SER | 127 | 13.231 | 2.242   | -8.709  | 1.00 | 0.00 |
| ATOM | 1988 | CA  | SER | 127 | 12.797 | 2.801   | -10.750 | 1.00 | 0.00 |
| ATOM | 1989 | HA  | SER | 127 | 13.470 | 3.642   | -10.583 | 1.00 | 0.00 |
| ATOM | 1990 | CB  | SER | 127 | 13.331 | 1.973   | -11.921 | 1.00 | 0.00 |
| ATOM | 1991 | HB2 | SER | 127 | 14.411 | 2.100   | -11.994 | 1.00 | 0.00 |
| ATOM | 1992 | HB3 | SER | 127 | 13.101 | 0.920   | -11.757 | 1.00 | 0.00 |
| ATOM | 1993 | OG  | SER | 127 | 12.721 | 2.408   | -13.127 | 1.00 | 0.00 |
| ATOM | 1994 | HG  | SER | 127 | 13.057 | 1.888   | -13.861 | 1.00 | 0.00 |
| ATOM | 1995 | C   | SER | 127 | 11.399 | 3.323   | -11.093 | 1.00 | 0.00 |
| ATOM | 1996 | O   | SER | 127 | 10.450 | 2.861   | -10.482 | 1.00 | 0.00 |
| ATOM | 1997 | OXT | SER | 127 | 11.303 | 4.178   | -11.958 | 1.00 | 0.00 |
| TER  |      |     |     |     |        |         |         |      |      |
| ATOM | 1998 | S1  | LIG | 128 | 27.707 | -9.416  | -10.752 | 1.00 | 0.00 |
| ATOM | 1999 | O1  | LIG | 128 | 27.878 | -10.790 | -9.908  | 1.00 | 0.00 |
| ATOM | 2000 | O2  | LIG | 128 | 29.059 | -9.551  | -11.624 | 1.00 | 0.00 |
| ATOM | 2001 | H26 | LIG | 128 | 29.827 | -9.347  | -11.070 | 1.00 | 0.00 |

|      |      |     |     |     |        |         |         |      |      |
|------|------|-----|-----|-----|--------|---------|---------|------|------|
| ATOM | 2002 | O3  | LIG | 128 | 26.609 | -9.533  | -11.680 | 1.00 | 0.00 |
| ATOM | 2003 | O4  | LIG | 128 | 27.820 | -8.289  | -9.849  | 1.00 | 0.00 |
| ATOM | 2004 | C1  | LIG | 128 | 25.655 | -16.077 | -5.048  | 1.00 | 0.00 |
| ATOM | 2005 | H1  | LIG | 128 | 25.852 | -16.845 | -5.806  | 1.00 | 0.00 |
| ATOM | 2006 | H2  | LIG | 128 | 26.592 | -15.954 | -4.489  | 1.00 | 0.00 |
| ATOM | 2007 | C2  | LIG | 128 | 24.561 | -16.575 | -4.096  | 1.00 | 0.00 |
| ATOM | 2008 | H3  | LIG | 128 | 23.625 | -16.698 | -4.654  | 1.00 | 0.00 |
| ATOM | 2009 | H4  | LIG | 128 | 24.364 | -15.806 | -3.337  | 1.00 | 0.00 |
| ATOM | 2010 | C3  | LIG | 128 | 25.305 | -14.757 | -5.744  | 1.00 | 0.00 |
| ATOM | 2011 | H5  | LIG | 128 | 25.110 | -13.988 | -4.985  | 1.00 | 0.00 |
| ATOM | 2012 | H6  | LIG | 128 | 24.367 | -14.880 | -6.301  | 1.00 | 0.00 |
| ATOM | 2013 | C4  | LIG | 128 | 24.910 | -17.894 | -3.397  | 1.00 | 0.00 |
| ATOM | 2014 | H7  | LIG | 128 | 25.847 | -17.771 | -2.838  | 1.00 | 0.00 |
| ATOM | 2015 | H8  | LIG | 128 | 25.109 | -18.663 | -4.155  | 1.00 | 0.00 |
| ATOM | 2016 | C5  | LIG | 128 | 26.397 | -14.260 | -6.699  | 1.00 | 0.00 |
| ATOM | 2017 | H9  | LIG | 128 | 27.336 | -14.139 | -6.144  | 1.00 | 0.00 |
| ATOM | 2018 | H10 | LIG | 128 | 26.590 | -15.026 | -7.460  | 1.00 | 0.00 |
| ATOM | 2019 | C6  | LIG | 128 | 23.816 | -18.394 | -2.446  | 1.00 | 0.00 |
| ATOM | 2020 | H11 | LIG | 128 | 22.880 | -18.516 | -3.005  | 1.00 | 0.00 |
| ATOM | 2021 | H12 | LIG | 128 | 23.618 | -17.624 | -1.687  | 1.00 | 0.00 |
| ATOM | 2022 | C7  | LIG | 128 | 26.045 | -12.939 | -7.391  | 1.00 | 0.00 |
| ATOM | 2023 | H13 | LIG | 128 | 25.104 | -13.060 | -7.943  | 1.00 | 0.00 |

|      |      |     |     |     |         |         |        |      |      |
|------|------|-----|-----|-----|---------|---------|--------|------|------|
| ATOM | 2024 | H14 | LIG | 128 | 25.857  | -12.171 | -6.629 | 1.00 | 0.00 |
| ATOM | 2025 | C8  | LIG | 128 | 24.164  | -19.713 | -1.747 | 1.00 | 0.00 |
| ATOM | 2026 | H15 | LIG | 128 | 24.362  | -20.483 | -2.505 | 1.00 | 0.00 |
| ATOM | 2027 | H16 | LIG | 128 | 25.101  | -19.591 | -1.189 | 1.00 | 0.00 |
| ATOM | 2028 | C9  | LIG | 128 | 27.143  | -12.455 | -8.347 | 1.00 | 0.00 |
| ATOM | 2029 | H17 | LIG | 128 | 27.322  | -13.206 | -9.124 | 1.00 | 0.00 |
| ATOM | 2030 | H18 | LIG | 128 | 28.083  | -12.324 | -7.803 | 1.00 | 0.00 |
| ATOM | 2031 | C10 | LIG | 128 | 23.071  | -20.213 | -0.795 | 1.00 | 0.00 |
| ATOM | 2032 | H19 | LIG | 128 | 22.135  | -20.334 | -1.354 | 1.00 | 0.00 |
| ATOM | 2033 | H20 | LIG | 128 | 22.874  | -19.444 | -0.038 | 1.00 | 0.00 |
| ATOM | 2034 | C11 | LIG | 128 | 26.772  | -11.143 | -9.012 | 1.00 | 0.00 |
| ATOM | 2035 | H21 | LIG | 128 | 25.863  | -11.236 | -9.612 | 1.00 | 0.00 |
| ATOM | 2036 | H22 | LIG | 128 | 26.648  | -10.338 | -8.282 | 1.00 | 0.00 |
| ATOM | 2037 | C12 | LIG | 128 | 23.428  | -21.532 | -0.103 | 1.00 | 0.00 |
| ATOM | 2038 | H23 | LIG | 128 | 24.342  | -21.432 | 0.491  | 1.00 | 0.00 |
| ATOM | 2039 | H24 | LIG | 128 | 22.630  | -21.859 | 0.569  | 1.00 | 0.00 |
| ATOM | 2040 | H25 | LIG | 128 | 23.595  | -22.329 | -0.834 | 1.00 | 0.00 |
| TER  |      |     |     |     |         |         |        |      |      |
| ATOM | 2041 | S1  | LIG | 129 | -22.059 | 6.341   | 2.565  | 1.00 | 0.00 |
| ATOM | 2042 | O1  | LIG | 129 | -22.003 | 7.720   | 3.415  | 1.00 | 0.00 |
| ATOM | 2043 | O2  | LIG | 129 | -20.877 | 5.574   | 3.354  | 1.00 | 0.00 |
| ATOM | 2044 | H26 | LIG | 129 | -20.018 | 5.936   | 3.088  | 1.00 | 0.00 |

|      |      |     |     |     |         |        |       |      |      |
|------|------|-----|-----|-----|---------|--------|-------|------|------|
| ATOM | 2045 | O3  | LIG | 129 | -23.276 | 5.624  | 2.855 | 1.00 | 0.00 |
| ATOM | 2046 | O4  | LIG | 129 | -21.642 | 6.608  | 1.203 | 1.00 | 0.00 |
| ATOM | 2047 | C1  | LIG | 129 | -24.387 | 14.577 | 5.366 | 1.00 | 0.00 |
| ATOM | 2048 | H1  | LIG | 129 | -24.423 | 14.257 | 6.415 | 1.00 | 0.00 |
| ATOM | 2049 | H2  | LIG | 129 | -23.377 | 14.973 | 5.203 | 1.00 | 0.00 |
| ATOM | 2050 | C2  | LIG | 129 | -25.409 | 15.699 | 5.144 | 1.00 | 0.00 |
| ATOM | 2051 | H3  | LIG | 129 | -26.420 | 15.304 | 5.308 | 1.00 | 0.00 |
| ATOM | 2052 | H4  | LIG | 129 | -25.375 | 16.018 | 4.095 | 1.00 | 0.00 |
| ATOM | 2053 | C3  | LIG | 129 | -24.607 | 13.362 | 4.459 | 1.00 | 0.00 |
| ATOM | 2054 | H5  | LIG | 129 | -24.569 | 13.681 | 3.409 | 1.00 | 0.00 |
| ATOM | 2055 | H6  | LIG | 129 | -25.619 | 12.968 | 4.621 | 1.00 | 0.00 |
| ATOM | 2056 | C4  | LIG | 129 | -25.191 | 16.916 | 6.050 | 1.00 | 0.00 |
| ATOM | 2057 | H7  | LIG | 129 | -24.180 | 17.312 | 5.886 | 1.00 | 0.00 |
| ATOM | 2058 | H8  | LIG | 129 | -25.225 | 16.597 | 7.099 | 1.00 | 0.00 |
| ATOM | 2059 | C5  | LIG | 129 | -23.587 | 12.239 | 4.682 | 1.00 | 0.00 |
| ATOM | 2060 | H9  | LIG | 129 | -22.575 | 12.632 | 4.524 | 1.00 | 0.00 |
| ATOM | 2061 | H10 | LIG | 129 | -23.627 | 11.916 | 5.730 | 1.00 | 0.00 |
| ATOM | 2062 | C6  | LIG | 129 | -26.213 | 18.037 | 5.830 | 1.00 | 0.00 |
| ATOM | 2063 | H11 | LIG | 129 | -27.224 | 17.641 | 5.993 | 1.00 | 0.00 |
| ATOM | 2064 | H12 | LIG | 129 | -26.179 | 18.357 | 4.779 | 1.00 | 0.00 |
| ATOM | 2065 | C7  | LIG | 129 | -23.808 | 11.026 | 3.772 | 1.00 | 0.00 |
| ATOM | 2066 | H13 | LIG | 129 | -24.821 | 10.636 | 3.930 | 1.00 | 0.00 |



|      |      |     |     |     |         |         |        |      |      |
|------|------|-----|-----|-----|---------|---------|--------|------|------|
| ATOM | 2067 | H14 | LIG | 129 | -23.763 | 11.349  | 2.724  | 1.00 | 0.00 |
| ATOM | 2068 | C8  | LIG | 129 | -25.996 | 19.255  | 6.735  | 1.00 | 0.00 |
| ATOM | 2069 | H15 | LIG | 129 | -26.031 | 18.937  | 7.785  | 1.00 | 0.00 |
| ATOM | 2070 | H16 | LIG | 129 | -24.985 | 19.651  | 6.572  | 1.00 | 0.00 |
| ATOM | 2071 | C9  | LIG | 129 | -22.784 | 9.908   | 4.009  | 1.00 | 0.00 |
| ATOM | 2072 | H17 | LIG | 129 | -22.837 | 9.564   | 5.047  | 1.00 | 0.00 |
| ATOM | 2073 | H18 | LIG | 129 | -21.770 | 10.287  | 3.846  | 1.00 | 0.00 |
| ATOM | 2074 | C10 | LIG | 129 | -27.018 | 20.377  | 6.515  | 1.00 | 0.00 |
| ATOM | 2075 | H19 | LIG | 129 | -28.027 | 19.981  | 6.677  | 1.00 | 0.00 |
| ATOM | 2076 | H20 | LIG | 129 | -26.982 | 20.696  | 5.466  | 1.00 | 0.00 |
| ATOM | 2077 | C11 | LIG | 129 | -23.022 | 8.725   | 3.090  | 1.00 | 0.00 |
| ATOM | 2078 | H21 | LIG | 129 | -24.006 | 8.278   | 3.252  | 1.00 | 0.00 |
| ATOM | 2079 | H22 | LIG | 129 | -22.912 | 8.999   | 2.038  | 1.00 | 0.00 |
| ATOM | 2080 | C12 | LIG | 129 | -26.792 | 21.588  | 7.425  | 1.00 | 0.00 |
| ATOM | 2081 | H23 | LIG | 129 | -25.802 | 22.027  | 7.261  | 1.00 | 0.00 |
| ATOM | 2082 | H24 | LIG | 129 | -27.535 | 22.369  | 7.242  | 1.00 | 0.00 |
| ATOM | 2083 | H25 | LIG | 129 | -26.857 | 21.308  | 8.480  | 1.00 | 0.00 |
| TER  |      |     |     |     |         |         |        |      |      |
| ATOM | 2084 | S1  | LIG | 130 | 12.831  | -11.733 | 22.757 | 1.00 | 0.00 |
| ATOM | 2085 | O1  | LIG | 130 | 14.379  | -11.262 | 22.862 | 1.00 | 0.00 |
| ATOM | 2086 | O2  | LIG | 130 | 12.255  | -10.373 | 22.105 | 1.00 | 0.00 |
| ATOM | 2087 | H26 | LIG | 130 | 12.206  | -9.681  | 22.782 | 1.00 | 0.00 |

|      |      |     |     |     |        |         |        |      |      |
|------|------|-----|-----|-----|--------|---------|--------|------|------|
| ATOM | 2088 | O3  | LIG | 130 | 12.687 | -12.759 | 21.755 | 1.00 | 0.00 |
| ATOM | 2089 | O4  | LIG | 130 | 12.295 | -11.897 | 24.094 | 1.00 | 0.00 |
| ATOM | 2090 | C1  | LIG | 130 | 21.687 | -12.279 | 24.302 | 1.00 | 0.00 |
| ATOM | 2091 | H1  | LIG | 130 | 21.928 | -11.898 | 23.302 | 1.00 | 0.00 |
| ATOM | 2092 | H2  | LIG | 130 | 21.675 | -11.405 | 24.966 | 1.00 | 0.00 |
| ATOM | 2093 | C2  | LIG | 130 | 22.789 | -13.243 | 24.757 | 1.00 | 0.00 |
| ATOM | 2094 | H3  | LIG | 130 | 22.801 | -14.117 | 24.093 | 1.00 | 0.00 |
| ATOM | 2095 | H4  | LIG | 130 | 22.547 | -13.625 | 25.757 | 1.00 | 0.00 |
| ATOM | 2096 | C3  | LIG | 130 | 20.292 | -12.914 | 24.278 | 1.00 | 0.00 |
| ATOM | 2097 | H5  | LIG | 130 | 20.049 | -13.293 | 25.280 | 1.00 | 0.00 |
| ATOM | 2098 | H6  | LIG | 130 | 20.304 | -13.790 | 23.617 | 1.00 | 0.00 |
| ATOM | 2099 | C4  | LIG | 130 | 24.186 | -12.610 | 24.782 | 1.00 | 0.00 |
| ATOM | 2100 | H7  | LIG | 130 | 24.174 | -11.736 | 25.447 | 1.00 | 0.00 |
| ATOM | 2101 | H8  | LIG | 130 | 24.427 | -12.227 | 23.782 | 1.00 | 0.00 |
| ATOM | 2102 | C5  | LIG | 130 | 19.189 | -11.952 | 23.821 | 1.00 | 0.00 |
| ATOM | 2103 | H9  | LIG | 130 | 19.177 | -11.074 | 24.481 | 1.00 | 0.00 |
| ATOM | 2104 | H10 | LIG | 130 | 19.429 | -11.575 | 22.819 | 1.00 | 0.00 |
| ATOM | 2105 | C6  | LIG | 130 | 25.289 | -13.573 | 25.235 | 1.00 | 0.00 |
| ATOM | 2106 | H11 | LIG | 130 | 25.300 | -14.448 | 24.572 | 1.00 | 0.00 |
| ATOM | 2107 | H12 | LIG | 130 | 25.047 | -13.956 | 26.236 | 1.00 | 0.00 |
| ATOM | 2108 | C7  | LIG | 130 | 17.795 | -12.588 | 23.801 | 1.00 | 0.00 |
| ATOM | 2109 | H13 | LIG | 130 | 17.809 | -13.467 | 23.144 | 1.00 | 0.00 |

|      |      |     |     |     |        |         |        |      |      |
|------|------|-----|-----|-----|--------|---------|--------|------|------|
| ATOM | 2110 | H14 | LIG | 130 | 17.554 | -12.960 | 24.806 | 1.00 | 0.00 |
| ATOM | 2111 | C8  | LIG | 130 | 26.685 | -12.942 | 25.261 | 1.00 | 0.00 |
| ATOM | 2112 | H15 | LIG | 130 | 26.929 | -12.559 | 24.261 | 1.00 | 0.00 |
| ATOM | 2113 | H16 | LIG | 130 | 26.674 | -12.067 | 25.924 | 1.00 | 0.00 |
| ATOM | 2114 | C9  | LIG | 130 | 16.702 | -11.617 | 23.337 | 1.00 | 0.00 |
| ATOM | 2115 | H17 | LIG | 130 | 16.923 | -11.257 | 22.327 | 1.00 | 0.00 |
| ATOM | 2116 | H18 | LIG | 130 | 16.676 | -10.740 | 23.992 | 1.00 | 0.00 |
| ATOM | 2117 | C10 | LIG | 130 | 27.789 | -13.904 | 25.714 | 1.00 | 0.00 |
| ATOM | 2118 | H19 | LIG | 130 | 27.799 | -14.778 | 25.052 | 1.00 | 0.00 |
| ATOM | 2119 | H20 | LIG | 130 | 27.546 | -14.285 | 26.714 | 1.00 | 0.00 |
| ATOM | 2120 | C11 | LIG | 130 | 15.333 | -12.271 | 23.334 | 1.00 | 0.00 |
| ATOM | 2121 | H21 | LIG | 130 | 15.294 | -13.124 | 22.653 | 1.00 | 0.00 |
| ATOM | 2122 | H22 | LIG | 130 | 15.032 | -12.588 | 24.336 | 1.00 | 0.00 |
| ATOM | 2123 | C12 | LIG | 130 | 29.180 | -13.263 | 25.736 | 1.00 | 0.00 |
| ATOM | 2124 | H23 | LIG | 130 | 29.209 | -12.406 | 26.417 | 1.00 | 0.00 |
| ATOM | 2125 | H24 | LIG | 130 | 29.942 | -13.974 | 26.065 | 1.00 | 0.00 |
| ATOM | 2126 | H25 | LIG | 130 | 29.466 | -12.905 | 24.742 | 1.00 | 0.00 |
| TER  |      |     |     |     |        |         |        |      |      |
| ATOM | 2127 | S1  | LIG | 131 | -0.775 | -14.715 | 23.850 | 1.00 | 0.00 |
| ATOM | 2128 | O1  | LIG | 131 | -2.025 | -13.869 | 24.443 | 1.00 | 0.00 |
| ATOM | 2129 | O2  | LIG | 131 | -0.858 | -15.946 | 24.892 | 1.00 | 0.00 |
| ATOM | 2130 | H26 | LIG | 131 | -0.516 | -15.667 | 25.755 | 1.00 | 0.00 |

|      |      |     |     |     |        |         |        |      |      |
|------|------|-----|-----|-----|--------|---------|--------|------|------|
| ATOM | 2131 | O3  | LIG | 131 | -1.105 | -15.254 | 22.555 | 1.00 | 0.00 |
| ATOM | 2132 | O4  | LIG | 131 | 0.448  | -13.970 | 24.073 | 1.00 | 0.00 |
| ATOM | 2133 | C1  | LIG | 131 | -6.969 | -8.206  | 24.468 | 1.00 | 0.00 |
| ATOM | 2134 | H1  | LIG | 131 | -7.788 | -8.933  | 24.534 | 1.00 | 0.00 |
| ATOM | 2135 | H2  | LIG | 131 | -6.689 | -7.969  | 25.502 | 1.00 | 0.00 |
| ATOM | 2136 | C2  | LIG | 131 | -7.475 | -6.934  | 23.778 | 1.00 | 0.00 |
| ATOM | 2137 | H3  | LIG | 131 | -7.756 | -7.171  | 22.744 | 1.00 | 0.00 |
| ATOM | 2138 | H4  | LIG | 131 | -6.656 | -6.207  | 23.711 | 1.00 | 0.00 |
| ATOM | 2139 | C3  | LIG | 131 | -5.775 | -8.853  | 23.757 | 1.00 | 0.00 |
| ATOM | 2140 | H5  | LIG | 131 | -4.954 | -8.127  | 23.693 | 1.00 | 0.00 |
| ATOM | 2141 | H6  | LIG | 131 | -6.055 | -9.088  | 22.721 | 1.00 | 0.00 |
| ATOM | 2142 | C4  | LIG | 131 | -8.669 | -6.284  | 24.488 | 1.00 | 0.00 |
| ATOM | 2143 | H7  | LIG | 131 | -8.388 | -6.046  | 25.523 | 1.00 | 0.00 |
| ATOM | 2144 | H8  | LIG | 131 | -9.488 | -7.011  | 24.556 | 1.00 | 0.00 |
| ATOM | 2145 | C5  | LIG | 131 | -5.270 | -10.127 | 24.444 | 1.00 | 0.00 |
| ATOM | 2146 | H9  | LIG | 131 | -4.992 | -9.894  | 25.480 | 1.00 | 0.00 |
| ATOM | 2147 | H10 | LIG | 131 | -6.089 | -10.855 | 24.505 | 1.00 | 0.00 |
| ATOM | 2148 | C6  | LIG | 131 | -9.177 | -5.013  | 23.799 | 1.00 | 0.00 |
| ATOM | 2149 | H11 | LIG | 131 | -9.456 | -5.250  | 22.765 | 1.00 | 0.00 |
| ATOM | 2150 | H12 | LIG | 131 | -8.356 | -4.285  | 23.731 | 1.00 | 0.00 |
| ATOM | 2151 | C7  | LIG | 131 | -4.075 | -10.770 | 23.732 | 1.00 | 0.00 |
| ATOM | 2152 | H13 | LIG | 131 | -4.353 | -11.000 | 22.695 | 1.00 | 0.00 |

|      |      |     |     |     |         |         |         |      |      |
|------|------|-----|-----|-----|---------|---------|---------|------|------|
| ATOM | 2153 | H14 | LIG | 131 | -3.255  | -10.043 | 23.676  | 1.00 | 0.00 |
| ATOM | 2154 | C8  | LIG | 131 | -10.370 | -4.363  | 24.508  | 1.00 | 0.00 |
| ATOM | 2155 | H15 | LIG | 131 | -11.191 | -5.089  | 24.576  | 1.00 | 0.00 |
| ATOM | 2156 | H16 | LIG | 131 | -10.090 | -4.126  | 25.543  | 1.00 | 0.00 |
| ATOM | 2157 | C9  | LIG | 131 | -3.582  | -12.047 | 24.426  | 1.00 | 0.00 |
| ATOM | 2158 | H17 | LIG | 131 | -4.389  | -12.786 | 24.468  | 1.00 | 0.00 |
| ATOM | 2159 | H18 | LIG | 131 | -3.296  | -11.825 | 25.459  | 1.00 | 0.00 |
| ATOM | 2160 | C10 | LIG | 131 | -10.878 | -3.091  | 23.820  | 1.00 | 0.00 |
| ATOM | 2161 | H19 | LIG | 131 | -11.157 | -3.328  | 22.786  | 1.00 | 0.00 |
| ATOM | 2162 | H20 | LIG | 131 | -10.058 | -2.365  | 23.754  | 1.00 | 0.00 |
| ATOM | 2163 | C11 | LIG | 131 | -2.396  | -12.657 | 23.705  | 1.00 | 0.00 |
| ATOM | 2164 | H21 | LIG | 131 | -2.648  | -12.943 | 22.681  | 1.00 | 0.00 |
| ATOM | 2165 | H22 | LIG | 131 | -1.535  | -11.982 | 23.696  | 1.00 | 0.00 |
| ATOM | 2166 | C12 | LIG | 131 | -12.071 | -2.450  | 24.536  | 1.00 | 0.00 |
| ATOM | 2167 | H23 | LIG | 131 | -11.812 | -2.171  | 25.562  | 1.00 | 0.00 |
| ATOM | 2168 | H24 | LIG | 131 | -12.407 | -1.546  | 24.021  | 1.00 | 0.00 |
| ATOM | 2169 | H25 | LIG | 131 | -12.919 | -3.139  | 24.586  | 1.00 | 0.00 |
| TER  |      |     |     |     |         |         |         |      |      |
| ATOM | 2170 | S1  | LIG | 132 | 20.589  | 17.402  | -25.063 | 1.00 | 0.00 |
| ATOM | 2171 | O1  | LIG | 132 | 20.783  | 15.973  | -25.805 | 1.00 | 0.00 |
| ATOM | 2172 | O2  | LIG | 132 | 20.110  | 18.235  | -26.362 | 1.00 | 0.00 |
| ATOM | 2173 | H26 | LIG | 132 | 20.871  | 18.411  | -26.936 | 1.00 | 0.00 |

|      |      |     |     |     |        |        |         |      |      |
|------|------|-----|-----|-----|--------|--------|---------|------|------|
| ATOM | 2174 | O3  | LIG | 132 | 19.458 | 17.353 | -24.170 | 1.00 | 0.00 |
| ATOM | 2175 | O4  | LIG | 132 | 21.882 | 17.887 | -24.624 | 1.00 | 0.00 |
| ATOM | 2176 | C1  | LIG | 132 | 22.213 | 8.597  | -26.029 | 1.00 | 0.00 |
| ATOM | 2177 | H1  | LIG | 132 | 21.276 | 8.440  | -26.578 | 1.00 | 0.00 |
| ATOM | 2178 | H2  | LIG | 132 | 22.985 | 8.771  | -26.789 | 1.00 | 0.00 |
| ATOM | 2179 | C2  | LIG | 132 | 22.558 | 7.326  | -25.243 | 1.00 | 0.00 |
| ATOM | 2180 | H3  | LIG | 132 | 21.786 | 7.150  | -24.483 | 1.00 | 0.00 |
| ATOM | 2181 | H4  | LIG | 132 | 23.495 | 7.482  | -24.693 | 1.00 | 0.00 |
| ATOM | 2182 | C3  | LIG | 132 | 22.081 | 9.843  | -25.147 | 1.00 | 0.00 |
| ATOM | 2183 | H5  | LIG | 132 | 23.019 | 10.001 | -24.599 | 1.00 | 0.00 |
| ATOM | 2184 | H6  | LIG | 132 | 21.310 | 9.667  | -24.385 | 1.00 | 0.00 |
| ATOM | 2185 | C4  | LIG | 132 | 22.692 | 6.077  | -26.123 | 1.00 | 0.00 |
| ATOM | 2186 | H7  | LIG | 132 | 23.465 | 6.252  | -26.883 | 1.00 | 0.00 |
| ATOM | 2187 | H8  | LIG | 132 | 21.756 | 5.921  | -26.674 | 1.00 | 0.00 |
| ATOM | 2188 | C5  | LIG | 132 | 21.733 | 11.114 | -25.931 | 1.00 | 0.00 |
| ATOM | 2189 | H9  | LIG | 132 | 22.502 | 11.290 | -26.695 | 1.00 | 0.00 |
| ATOM | 2190 | H10 | LIG | 132 | 20.793 | 10.958 | -26.476 | 1.00 | 0.00 |
| ATOM | 2191 | C6  | LIG | 132 | 23.036 | 4.806  | -25.338 | 1.00 | 0.00 |
| ATOM | 2192 | H11 | LIG | 132 | 22.263 | 4.632  | -24.578 | 1.00 | 0.00 |
| ATOM | 2193 | H12 | LIG | 132 | 23.973 | 4.963  | -24.787 | 1.00 | 0.00 |
| ATOM | 2194 | C7  | LIG | 132 | 21.604 | 12.359 | -25.047 | 1.00 | 0.00 |
| ATOM | 2195 | H13 | LIG | 132 | 20.837 | 12.181 | -24.282 | 1.00 | 0.00 |

|      |      |     |     |     |         |        |         |      |      |
|------|------|-----|-----|-----|---------|--------|---------|------|------|
| ATOM | 2196 | H14 | LIG | 132 | 22.546  | 12.517 | -24.506 | 1.00 | 0.00 |
| ATOM | 2197 | C8  | LIG | 132 | 23.170  | 3.558  | -26.217 | 1.00 | 0.00 |
| ATOM | 2198 | H15 | LIG | 132 | 22.233  | 3.399  | -26.768 | 1.00 | 0.00 |
| ATOM | 2199 | H16 | LIG | 132 | 23.942  | 3.733  | -26.978 | 1.00 | 0.00 |
| ATOM | 2200 | C9  | LIG | 132 | 21.251  | 13.622 | -25.843 | 1.00 | 0.00 |
| ATOM | 2201 | H17 | LIG | 132 | 20.301  | 13.482 | -26.369 | 1.00 | 0.00 |
| ATOM | 2202 | H18 | LIG | 132 | 22.015  | 13.812 | -26.603 | 1.00 | 0.00 |
| ATOM | 2203 | C10 | LIG | 132 | 23.514  | 2.286  | -25.434 | 1.00 | 0.00 |
| ATOM | 2204 | H19 | LIG | 132 | 22.742  | 2.112  | -24.674 | 1.00 | 0.00 |
| ATOM | 2205 | H20 | LIG | 132 | 24.450  | 2.443  | -24.885 | 1.00 | 0.00 |
| ATOM | 2206 | C11 | LIG | 132 | 21.137  | 14.839 | -24.945 | 1.00 | 0.00 |
| ATOM | 2207 | H21 | LIG | 132 | 20.349  | 14.718 | -24.197 | 1.00 | 0.00 |
| ATOM | 2208 | H22 | LIG | 132 | 22.083  | 15.066 | -24.446 | 1.00 | 0.00 |
| ATOM | 2209 | C12 | LIG | 132 | 23.645  | 1.044  | -26.321 | 1.00 | 0.00 |
| ATOM | 2210 | H23 | LIG | 132 | 24.433  | 1.176  | -27.070 | 1.00 | 0.00 |
| ATOM | 2211 | H24 | LIG | 132 | 23.892  | 0.157  | -25.733 | 1.00 | 0.00 |
| ATOM | 2212 | H25 | LIG | 132 | 22.713  | 0.840  | -26.856 | 1.00 | 0.00 |
| TER  |      |     |     |     |         |        |         |      |      |
| ATOM | 2213 | S1  | LIG | 133 | -25.726 | 0.261  | 17.108  | 1.00 | 0.00 |
| ATOM | 2214 | O1  | LIG | 133 | -26.264 | -0.834 | 18.176  | 1.00 | 0.00 |
| ATOM | 2215 | O2  | LIG | 133 | -25.991 | -0.615 | 15.778  | 1.00 | 0.00 |
| ATOM | 2216 | H26 | LIG | 133 | -25.319 | -1.309 | 15.704  | 1.00 | 0.00 |

|      |      |     |     |     |         |        |        |      |      |
|------|------|-----|-----|-----|---------|--------|--------|------|------|
| ATOM | 2217 | O3  | LIG | 133 | -26.629 | 1.383  | 17.045 | 1.00 | 0.00 |
| ATOM | 2218 | O4  | LIG | 133 | -24.300 | 0.444  | 17.295 | 1.00 | 0.00 |
| ATOM | 2219 | C1  | LIG | 133 | -28.135 | -3.246 | 25.046 | 1.00 | 0.00 |
| ATOM | 2220 | H1  | LIG | 133 | -29.119 | -3.546 | 24.664 | 1.00 | 0.00 |
| ATOM | 2221 | H2  | LIG | 133 | -27.481 | -4.118 | 24.916 | 1.00 | 0.00 |
| ATOM | 2222 | C2  | LIG | 133 | -28.250 | -2.921 | 26.540 | 1.00 | 0.00 |
| ATOM | 2223 | H3  | LIG | 133 | -28.905 | -2.050 | 26.670 | 1.00 | 0.00 |
| ATOM | 2224 | H4  | LIG | 133 | -27.266 | -2.621 | 26.922 | 1.00 | 0.00 |
| ATOM | 2225 | C3  | LIG | 133 | -27.599 | -2.082 | 24.206 | 1.00 | 0.00 |
| ATOM | 2226 | H5  | LIG | 133 | -26.613 | -1.784 | 24.587 | 1.00 | 0.00 |
| ATOM | 2227 | H6  | LIG | 133 | -28.253 | -1.210 | 24.338 | 1.00 | 0.00 |
| ATOM | 2228 | C4  | LIG | 133 | -28.785 | -4.084 | 27.382 | 1.00 | 0.00 |
| ATOM | 2229 | H7  | LIG | 133 | -28.130 | -4.956 | 27.253 | 1.00 | 0.00 |
| ATOM | 2230 | H8  | LIG | 133 | -29.769 | -4.386 | 27.000 | 1.00 | 0.00 |
| ATOM | 2231 | C5  | LIG | 133 | -27.486 | -2.406 | 22.712 | 1.00 | 0.00 |
| ATOM | 2232 | H9  | LIG | 133 | -26.835 | -3.279 | 22.578 | 1.00 | 0.00 |
| ATOM | 2233 | H10 | LIG | 133 | -28.472 | -2.700 | 22.329 | 1.00 | 0.00 |
| ATOM | 2234 | C6  | LIG | 133 | -28.902 | -3.759 | 28.876 | 1.00 | 0.00 |
| ATOM | 2235 | H11 | LIG | 133 | -29.556 | -2.888 | 29.006 | 1.00 | 0.00 |
| ATOM | 2236 | H12 | LIG | 133 | -27.917 | -3.458 | 29.259 | 1.00 | 0.00 |
| ATOM | 2237 | C7  | LIG | 133 | -26.947 | -1.240 | 21.875 | 1.00 | 0.00 |
| ATOM | 2238 | H13 | LIG | 133 | -27.598 | -0.367 | 22.011 | 1.00 | 0.00 |



|      |      |     |     |     |         |        |         |      |      |
|------|------|-----|-----|-----|---------|--------|---------|------|------|
| ATOM | 2239 | H14 | LIG | 133 | -25.960 | -0.950 | 22.255  | 1.00 | 0.00 |
| ATOM | 2240 | C8  | LIG | 133 | -29.436 | -4.922 | 29.719  | 1.00 | 0.00 |
| ATOM | 2241 | H15 | LIG | 133 | -30.421 | -5.224 | 29.338  | 1.00 | 0.00 |
| ATOM | 2242 | H16 | LIG | 133 | -28.782 | -5.794 | 29.589  | 1.00 | 0.00 |
| ATOM | 2243 | C9  | LIG | 133 | -26.845 | -1.575 | 20.381  | 1.00 | 0.00 |
| ATOM | 2244 | H17 | LIG | 133 | -27.830 | -1.846 | 19.988  | 1.00 | 0.00 |
| ATOM | 2245 | H18 | LIG | 133 | -26.191 | -2.441 | 20.235  | 1.00 | 0.00 |
| ATOM | 2246 | C10 | LIG | 133 | -29.553 | -4.598 | 31.213  | 1.00 | 0.00 |
| ATOM | 2247 | H19 | LIG | 133 | -30.207 | -3.727 | 31.342  | 1.00 | 0.00 |
| ATOM | 2248 | H20 | LIG | 133 | -28.569 | -4.299 | 31.594  | 1.00 | 0.00 |
| ATOM | 2249 | C11 | LIG | 133 | -26.302 | -0.408 | 19.579  | 1.00 | 0.00 |
| ATOM | 2250 | H21 | LIG | 133 | -26.950 | 0.469  | 19.652  | 1.00 | 0.00 |
| ATOM | 2251 | H22 | LIG | 133 | -25.288 | -0.140 | 19.886  | 1.00 | 0.00 |
| ATOM | 2252 | C12 | LIG | 133 | -30.089 | -5.766 | 32.046  | 1.00 | 0.00 |
| ATOM | 2253 | H23 | LIG | 133 | -29.438 | -6.642 | 31.963  | 1.00 | 0.00 |
| ATOM | 2254 | H24 | LIG | 133 | -30.159 | -5.503 | 33.105  | 1.00 | 0.00 |
| ATOM | 2255 | H25 | LIG | 133 | -31.087 | -6.065 | 31.712  | 1.00 | 0.00 |
| TER  |      |     |     |     |         |        |         |      |      |
| ATOM | 2256 | S1  | LIG | 134 | 14.040  | 16.014 | -14.168 | 1.00 | 0.00 |
| ATOM | 2257 | O1  | LIG | 134 | 15.383  | 15.880 | -15.066 | 1.00 | 0.00 |
| ATOM | 2258 | O2  | LIG | 134 | 13.018  | 16.311 | -15.384 | 1.00 | 0.00 |
| ATOM | 2259 | H26 | LIG | 134 | 13.138  | 17.220 | -15.697 | 1.00 | 0.00 |

|      |      |     |     |     |        |        |         |      |      |
|------|------|-----|-----|-----|--------|--------|---------|------|------|
| ATOM | 2260 | O3  | LIG | 134 | 13.669 | 14.730 | -13.629 | 1.00 | 0.00 |
| ATOM | 2261 | O4  | LIG | 134 | 14.149 | 17.189 | -13.326 | 1.00 | 0.00 |
| ATOM | 2262 | C1  | LIG | 134 | 22.678 | 14.442 | -16.171 | 1.00 | 0.00 |
| ATOM | 2263 | H1  | LIG | 134 | 22.410 | 13.736 | -16.966 | 1.00 | 0.00 |
| ATOM | 2264 | H2  | LIG | 134 | 22.795 | 15.419 | -16.658 | 1.00 | 0.00 |
| ATOM | 2265 | C2  | LIG | 134 | 24.018 | 14.024 | -15.553 | 1.00 | 0.00 |
| ATOM | 2266 | H3  | LIG | 134 | 23.902 | 13.047 | -15.066 | 1.00 | 0.00 |
| ATOM | 2267 | H4  | LIG | 134 | 24.286 | 14.730 | -14.757 | 1.00 | 0.00 |
| ATOM | 2268 | C3  | LIG | 134 | 21.534 | 14.518 | -15.155 | 1.00 | 0.00 |
| ATOM | 2269 | H5  | LIG | 134 | 21.801 | 15.226 | -14.360 | 1.00 | 0.00 |
| ATOM | 2270 | H6  | LIG | 134 | 21.419 | 13.541 | -14.666 | 1.00 | 0.00 |
| ATOM | 2271 | C4  | LIG | 134 | 25.165 | 13.948 | -16.568 | 1.00 | 0.00 |
| ATOM | 2272 | H7  | LIG | 134 | 25.282 | 14.926 | -17.054 | 1.00 | 0.00 |
| ATOM | 2273 | H8  | LIG | 134 | 24.897 | 13.244 | -17.365 | 1.00 | 0.00 |
| ATOM | 2274 | C5  | LIG | 134 | 20.193 | 14.933 | -15.772 | 1.00 | 0.00 |
| ATOM | 2275 | H9  | LIG | 134 | 20.307 | 15.908 | -16.263 | 1.00 | 0.00 |
| ATOM | 2276 | H10 | LIG | 134 | 19.923 | 14.224 | -16.564 | 1.00 | 0.00 |
| ATOM | 2277 | C6  | LIG | 134 | 26.504 | 13.529 | -15.951 | 1.00 | 0.00 |
| ATOM | 2278 | H11 | LIG | 134 | 26.387 | 12.553 | -15.464 | 1.00 | 0.00 |
| ATOM | 2279 | H12 | LIG | 134 | 26.773 | 14.235 | -15.154 | 1.00 | 0.00 |
| ATOM | 2280 | C7  | LIG | 134 | 19.052 | 15.011 | -14.753 | 1.00 | 0.00 |
| ATOM | 2281 | H13 | LIG | 134 | 18.940 | 14.036 | -14.261 | 1.00 | 0.00 |

|      |      |     |     |     |         |        |         |      |      |
|------|------|-----|-----|-----|---------|--------|---------|------|------|
| ATOM | 2282 | H14 | LIG | 134 | 19.320  | 15.725 | -13.964 | 1.00 | 0.00 |
| ATOM | 2283 | C8  | LIG | 134 | 27.652  | 13.454 | -16.965 | 1.00 | 0.00 |
| ATOM | 2284 | H15 | LIG | 134 | 27.385  | 12.747 | -17.762 | 1.00 | 0.00 |
| ATOM | 2285 | H16 | LIG | 134 | 27.768  | 14.430 | -17.453 | 1.00 | 0.00 |
| ATOM | 2286 | C9  | LIG | 134 | 17.715  | 15.422 | -15.384 | 1.00 | 0.00 |
| ATOM | 2287 | H17 | LIG | 134 | 17.428  | 14.703 | -16.158 | 1.00 | 0.00 |
| ATOM | 2288 | H18 | LIG | 134 | 17.815  | 16.397 | -15.871 | 1.00 | 0.00 |
| ATOM | 2289 | C10 | LIG | 134 | 28.992  | 13.034 | -16.349 | 1.00 | 0.00 |
| ATOM | 2290 | H19 | LIG | 134 | 28.874  | 12.059 | -15.862 | 1.00 | 0.00 |
| ATOM | 2291 | H20 | LIG | 134 | 29.259  | 13.741 | -15.553 | 1.00 | 0.00 |
| ATOM | 2292 | C11 | LIG | 134 | 16.606  | 15.498 | -14.352 | 1.00 | 0.00 |
| ATOM | 2293 | H21 | LIG | 134 | 16.433  | 14.531 | -13.872 | 1.00 | 0.00 |
| ATOM | 2294 | H22 | LIG | 134 | 16.811  | 16.254 | -13.590 | 1.00 | 0.00 |
| ATOM | 2295 | C12 | LIG | 134 | 30.131  | 12.961 | -17.370 | 1.00 | 0.00 |
| ATOM | 2296 | H23 | LIG | 134 | 30.294  | 13.932 | -17.850 | 1.00 | 0.00 |
| ATOM | 2297 | H24 | LIG | 134 | 31.071  | 12.662 | -16.900 | 1.00 | 0.00 |
| ATOM | 2298 | H25 | LIG | 134 | 29.909  | 12.236 | -18.160 | 1.00 | 0.00 |
| TER  |      |     |     |     |         |        |         |      |      |
| ATOM | 2299 | S1  | LIG | 135 | -27.792 | 4.947  | -28.327 | 1.00 | 0.00 |
| ATOM | 2300 | O1  | LIG | 135 | -27.693 | 6.412  | -27.639 | 1.00 | 0.00 |
| ATOM | 2301 | O2  | LIG | 135 | -28.180 | 4.127  | -26.990 | 1.00 | 0.00 |
| ATOM | 2302 | H26 | LIG | 135 | -27.396 | 4.029  | -26.428 | 1.00 | 0.00 |

|      |      |     |     |     |         |        |         |      |      |
|------|------|-----|-----|-----|---------|--------|---------|------|------|
| ATOM | 2303 | O3  | LIG | 135 | -28.941 | 4.878  | -29.194 | 1.00 | 0.00 |
| ATOM | 2304 | O4  | LIG | 135 | -26.475 | 4.546  | -28.778 | 1.00 | 0.00 |
| ATOM | 2305 | C1  | LIG | 135 | -26.829 | 13.879 | -27.698 | 1.00 | 0.00 |
| ATOM | 2306 | H1  | LIG | 135 | -27.763 | 13.983 | -27.134 | 1.00 | 0.00 |
| ATOM | 2307 | H2  | LIG | 135 | -26.030 | 13.791 | -26.951 | 1.00 | 0.00 |
| ATOM | 2308 | C2  | LIG | 135 | -26.599 | 15.144 | -28.534 | 1.00 | 0.00 |
| ATOM | 2309 | H3  | LIG | 135 | -27.397 | 15.233 | -29.282 | 1.00 | 0.00 |
| ATOM | 2310 | H4  | LIG | 135 | -25.664 | 15.039 | -29.100 | 1.00 | 0.00 |
| ATOM | 2311 | C3  | LIG | 135 | -26.883 | 12.595 | -28.534 | 1.00 | 0.00 |
| ATOM | 2312 | H5  | LIG | 135 | -25.947 | 12.490 | -29.097 | 1.00 | 0.00 |
| ATOM | 2313 | H6  | LIG | 135 | -27.681 | 12.686 | -29.283 | 1.00 | 0.00 |
| ATOM | 2314 | C4  | LIG | 135 | -26.543 | 16.429 | -27.700 | 1.00 | 0.00 |
| ATOM | 2315 | H7  | LIG | 135 | -25.743 | 16.341 | -26.953 | 1.00 | 0.00 |
| ATOM | 2316 | H8  | LIG | 135 | -27.477 | 16.534 | -27.134 | 1.00 | 0.00 |
| ATOM | 2317 | C5  | LIG | 135 | -27.116 | 11.331 | -27.699 | 1.00 | 0.00 |
| ATOM | 2318 | H9  | LIG | 135 | -26.321 | 11.241 | -26.948 | 1.00 | 0.00 |
| ATOM | 2319 | H10 | LIG | 135 | -28.054 | 11.434 | -27.139 | 1.00 | 0.00 |
| ATOM | 2320 | C6  | LIG | 135 | -26.314 | 17.694 | -28.535 | 1.00 | 0.00 |
| ATOM | 2321 | H11 | LIG | 135 | -27.112 | 17.782 | -29.283 | 1.00 | 0.00 |
| ATOM | 2322 | H12 | LIG | 135 | -25.379 | 17.590 | -29.102 | 1.00 | 0.00 |
| ATOM | 2323 | C7  | LIG | 135 | -27.167 | 10.049 | -28.538 | 1.00 | 0.00 |
| ATOM | 2324 | H13 | LIG | 135 | -27.961 | 10.141 | -29.290 | 1.00 | 0.00 |

|      |      |     |     |     |         |        |         |      |      |
|------|------|-----|-----|-----|---------|--------|---------|------|------|
| ATOM | 2325 | H14 | LIG | 135 | -26.227 | 9.944  | -29.094 | 1.00 | 0.00 |
| ATOM | 2326 | C8  | LIG | 135 | -26.258 | 18.979 | -27.703 | 1.00 | 0.00 |
| ATOM | 2327 | H15 | LIG | 135 | -27.192 | 19.086 | -27.136 | 1.00 | 0.00 |
| ATOM | 2328 | H16 | LIG | 135 | -25.459 | 18.891 | -26.954 | 1.00 | 0.00 |
| ATOM | 2329 | C9  | LIG | 135 | -27.407 | 8.791  | -27.691 | 1.00 | 0.00 |
| ATOM | 2330 | H17 | LIG | 135 | -28.354 | 8.878  | -27.149 | 1.00 | 0.00 |
| ATOM | 2331 | H18 | LIG | 135 | -26.615 | 8.688  | -26.942 | 1.00 | 0.00 |
| ATOM | 2332 | C10 | LIG | 135 | -26.029 | 20.245 | -28.537 | 1.00 | 0.00 |
| ATOM | 2333 | H19 | LIG | 135 | -26.826 | 20.333 | -29.284 | 1.00 | 0.00 |
| ATOM | 2334 | H20 | LIG | 135 | -25.094 | 20.140 | -29.101 | 1.00 | 0.00 |
| ATOM | 2335 | C11 | LIG | 135 | -27.445 | 7.538  | -28.545 | 1.00 | 0.00 |
| ATOM | 2336 | H21 | LIG | 135 | -28.255 | 7.573  | -29.277 | 1.00 | 0.00 |
| ATOM | 2337 | H22 | LIG | 135 | -26.495 | 7.366  | -29.057 | 1.00 | 0.00 |
| ATOM | 2338 | C12 | LIG | 135 | -25.975 | 21.524 | -27.695 | 1.00 | 0.00 |
| ATOM | 2339 | H23 | LIG | 135 | -25.164 | 21.480 | -26.961 | 1.00 | 0.00 |
| ATOM | 2340 | H24 | LIG | 135 | -25.809 | 22.406 | -28.319 | 1.00 | 0.00 |
| ATOM | 2341 | H25 | LIG | 135 | -26.909 | 21.676 | -27.146 | 1.00 | 0.00 |
| TER  |      |     |     |     |         |        |         |      |      |
| ATOM | 2342 | S1  | LIG | 136 | 9.458   | -8.749 | -24.880 | 1.00 | 0.00 |
| ATOM | 2343 | O1  | LIG | 136 | 9.818   | -7.176 | -25.035 | 1.00 | 0.00 |
| ATOM | 2344 | O2  | LIG | 136 | 8.667   | -8.634 | -23.477 | 1.00 | 0.00 |
| ATOM | 2345 | H26 | LIG | 136 | 9.301   | -8.504 | -22.755 | 1.00 | 0.00 |

|      |      |     |     |     |        |        |         |      |      |
|------|------|-----|-----|-----|--------|--------|---------|------|------|
| ATOM | 2346 | O3  | LIG | 136 | 8.483  | -9.138 | -25.868 | 1.00 | 0.00 |
| ATOM | 2347 | O4  | LIG | 136 | 10.684 | -9.498 | -24.688 | 1.00 | 0.00 |
| ATOM | 2348 | C1  | LIG | 136 | 12.561 | -1.175 | -28.637 | 1.00 | 0.00 |
| ATOM | 2349 | H1  | LIG | 136 | 11.607 | -0.656 | -28.483 | 1.00 | 0.00 |
| ATOM | 2350 | H2  | LIG | 136 | 13.182 | -0.937 | -27.764 | 1.00 | 0.00 |
| ATOM | 2351 | C2  | LIG | 136 | 13.236 | -0.627 | -29.900 | 1.00 | 0.00 |
| ATOM | 2352 | H3  | LIG | 136 | 12.616 | -0.864 | -30.774 | 1.00 | 0.00 |
| ATOM | 2353 | H4  | LIG | 136 | 14.191 | -1.146 | -30.055 | 1.00 | 0.00 |
| ATOM | 2354 | C3  | LIG | 136 | 12.313 | -2.687 | -28.684 | 1.00 | 0.00 |
| ATOM | 2355 | H5  | LIG | 136 | 13.269 | -3.206 | -28.837 | 1.00 | 0.00 |
| ATOM | 2356 | H6  | LIG | 136 | 11.695 | -2.925 | -29.560 | 1.00 | 0.00 |
| ATOM | 2357 | C4  | LIG | 136 | 13.486 | 0.885  | -29.856 | 1.00 | 0.00 |
| ATOM | 2358 | H7  | LIG | 136 | 14.108 | 1.124  | -28.982 | 1.00 | 0.00 |
| ATOM | 2359 | H8  | LIG | 136 | 12.532 | 1.405  | -29.699 | 1.00 | 0.00 |
| ATOM | 2360 | C5  | LIG | 136 | 11.636 | -3.235 | -27.423 | 1.00 | 0.00 |
| ATOM | 2361 | H9  | LIG | 136 | 12.252 | -2.996 | -26.547 | 1.00 | 0.00 |
| ATOM | 2362 | H10 | LIG | 136 | 10.679 | -2.720 | -27.272 | 1.00 | 0.00 |
| ATOM | 2363 | C6  | LIG | 136 | 14.160 | 1.435  | -31.118 | 1.00 | 0.00 |
| ATOM | 2364 | H11 | LIG | 136 | 13.540 | 1.196  | -31.991 | 1.00 | 0.00 |
| ATOM | 2365 | H12 | LIG | 136 | 15.115 | 0.915  | -31.274 | 1.00 | 0.00 |
| ATOM | 2366 | C7  | LIG | 136 | 11.392 | -4.748 | -27.472 | 1.00 | 0.00 |
| ATOM | 2367 | H13 | LIG | 136 | 10.778 | -4.986 | -28.350 | 1.00 | 0.00 |

|      |      |     |     |     |         |         |         |      |      |
|------|------|-----|-----|-----|---------|---------|---------|------|------|
| ATOM | 2368 | H14 | LIG | 136 | 12.350  | -5.263  | -27.618 | 1.00 | 0.00 |
| ATOM | 2369 | C8  | LIG | 136 | 14.410  | 2.946   | -31.074 | 1.00 | 0.00 |
| ATOM | 2370 | H15 | LIG | 136 | 13.456  | 3.467   | -30.919 | 1.00 | 0.00 |
| ATOM | 2371 | H16 | LIG | 136 | 15.031  | 3.185   | -30.200 | 1.00 | 0.00 |
| ATOM | 2372 | C9  | LIG | 136 | 10.708  | -5.283  | -26.207 | 1.00 | 0.00 |
| ATOM | 2373 | H17 | LIG | 136 | 9.741   | -4.790  | -26.065 | 1.00 | 0.00 |
| ATOM | 2374 | H18 | LIG | 136 | 11.318  | -5.056  | -25.327 | 1.00 | 0.00 |
| ATOM | 2375 | C10 | LIG | 136 | 15.085  | 3.497   | -32.336 | 1.00 | 0.00 |
| ATOM | 2376 | H19 | LIG | 136 | 14.465  | 3.257   | -33.209 | 1.00 | 0.00 |
| ATOM | 2377 | H20 | LIG | 136 | 16.039  | 2.977   | -32.490 | 1.00 | 0.00 |
| ATOM | 2378 | C11 | LIG | 136 | 10.486  | -6.782  | -26.280 | 1.00 | 0.00 |
| ATOM | 2379 | H21 | LIG | 136 | 9.839   | -7.055  | -27.116 | 1.00 | 0.00 |
| ATOM | 2380 | H22 | LIG | 136 | 11.430  | -7.329  | -26.353 | 1.00 | 0.00 |
| ATOM | 2381 | C12 | LIG | 136 | 15.329  | 5.008   | -32.282 | 1.00 | 0.00 |
| ATOM | 2382 | H23 | LIG | 136 | 15.974  | 5.274   | -31.439 | 1.00 | 0.00 |
| ATOM | 2383 | H24 | LIG | 136 | 15.812  | 5.367   | -33.195 | 1.00 | 0.00 |
| ATOM | 2384 | H25 | LIG | 136 | 14.390  | 5.556   | -32.165 | 1.00 | 0.00 |
| TER  |      |     |     |     |         |         |         |      |      |
| ATOM | 2385 | S1  | LIG | 137 | -17.752 | -20.911 | -30.591 | 1.00 | 0.00 |
| ATOM | 2386 | O1  | LIG | 137 | -17.419 | -20.643 | -29.027 | 1.00 | 0.00 |
| ATOM | 2387 | O2  | LIG | 137 | -16.280 | -20.577 | -31.166 | 1.00 | 0.00 |
| ATOM | 2388 | H26 | LIG | 137 | -16.135 | -19.619 | -31.156 | 1.00 | 0.00 |

|      |      |     |     |     |         |         |         |      |      |
|------|------|-----|-----|-----|---------|---------|---------|------|------|
| ATOM | 2389 | O3  | LIG | 137 | -17.971 | -22.317 | -30.822 | 1.00 | 0.00 |
| ATOM | 2390 | O4  | LIG | 137 | -18.693 | -19.910 | -31.053 | 1.00 | 0.00 |
| ATOM | 2391 | C1  | LIG | 137 | -19.005 | -20.570 | -21.679 | 1.00 | 0.00 |
| ATOM | 2392 | H1  | LIG | 137 | -18.096 | -21.154 | -21.486 | 1.00 | 0.00 |
| ATOM | 2393 | H2  | LIG | 137 | -18.706 | -19.515 | -21.627 | 1.00 | 0.00 |
| ATOM | 2394 | C2  | LIG | 137 | -20.034 | -20.857 | -20.580 | 1.00 | 0.00 |
| ATOM | 2395 | H3  | LIG | 137 | -20.334 | -21.911 | -20.631 | 1.00 | 0.00 |
| ATOM | 2396 | H4  | LIG | 137 | -20.944 | -20.273 | -20.773 | 1.00 | 0.00 |
| ATOM | 2397 | C3  | LIG | 137 | -19.515 | -20.881 | -23.090 | 1.00 | 0.00 |
| ATOM | 2398 | H5  | LIG | 137 | -20.423 | -20.295 | -23.285 | 1.00 | 0.00 |
| ATOM | 2399 | H6  | LIG | 137 | -19.817 | -21.936 | -23.141 | 1.00 | 0.00 |
| ATOM | 2400 | C4  | LIG | 137 | -19.526 | -20.545 | -19.167 | 1.00 | 0.00 |
| ATOM | 2401 | H7  | LIG | 137 | -19.227 | -19.489 | -19.115 | 1.00 | 0.00 |
| ATOM | 2402 | H8  | LIG | 137 | -18.616 | -21.127 | -18.973 | 1.00 | 0.00 |
| ATOM | 2403 | C5  | LIG | 137 | -18.486 | -20.598 | -24.190 | 1.00 | 0.00 |
| ATOM | 2404 | H9  | LIG | 137 | -18.181 | -19.544 | -24.139 | 1.00 | 0.00 |
| ATOM | 2405 | H10 | LIG | 137 | -17.579 | -21.186 | -23.999 | 1.00 | 0.00 |
| ATOM | 2406 | C6  | LIG | 137 | -20.554 | -20.832 | -18.067 | 1.00 | 0.00 |
| ATOM | 2407 | H11 | LIG | 137 | -20.854 | -21.887 | -18.119 | 1.00 | 0.00 |
| ATOM | 2408 | H12 | LIG | 137 | -21.465 | -20.249 | -18.261 | 1.00 | 0.00 |
| ATOM | 2409 | C7  | LIG | 137 | -19.000 | -20.908 | -25.600 | 1.00 | 0.00 |
| ATOM | 2410 | H13 | LIG | 137 | -19.307 | -21.960 | -25.650 | 1.00 | 0.00 |



|      |      |     |     |     |         |         |         |      |      |
|------|------|-----|-----|-----|---------|---------|---------|------|------|
| ATOM | 2411 | H14 | LIG | 137 | -19.904 | -20.315 | -25.793 | 1.00 | 0.00 |
| ATOM | 2412 | C8  | LIG | 137 | -20.048 | -20.521 | -16.654 | 1.00 | 0.00 |
| ATOM | 2413 | H15 | LIG | 137 | -19.138 | -21.104 | -16.459 | 1.00 | 0.00 |
| ATOM | 2414 | H16 | LIG | 137 | -19.747 | -19.466 | -16.602 | 1.00 | 0.00 |
| ATOM | 2415 | C9  | LIG | 137 | -17.959 | -20.625 | -26.691 | 1.00 | 0.00 |
| ATOM | 2416 | H17 | LIG | 137 | -17.061 | -21.228 | -26.519 | 1.00 | 0.00 |
| ATOM | 2417 | H18 | LIG | 137 | -17.653 | -19.574 | -26.654 | 1.00 | 0.00 |
| ATOM | 2418 | C10 | LIG | 137 | -21.075 | -20.808 | -15.553 | 1.00 | 0.00 |
| ATOM | 2419 | H19 | LIG | 137 | -21.374 | -21.861 | -15.606 | 1.00 | 0.00 |
| ATOM | 2420 | H20 | LIG | 137 | -21.983 | -20.224 | -15.747 | 1.00 | 0.00 |
| ATOM | 2421 | C11 | LIG | 137 | -18.497 | -20.933 | -28.075 | 1.00 | 0.00 |
| ATOM | 2422 | H21 | LIG | 137 | -18.770 | -21.986 | -28.178 | 1.00 | 0.00 |
| ATOM | 2423 | H22 | LIG | 137 | -19.357 | -20.306 | -28.326 | 1.00 | 0.00 |
| ATOM | 2424 | C12 | LIG | 137 | -20.558 | -20.494 | -14.146 | 1.00 | 0.00 |
| ATOM | 2425 | H23 | LIG | 137 | -20.282 | -19.438 | -14.052 | 1.00 | 0.00 |
| ATOM | 2426 | H24 | LIG | 137 | -21.314 | -20.707 | -13.386 | 1.00 | 0.00 |
| ATOM | 2427 | H25 | LIG | 137 | -19.671 | -21.089 | -13.908 | 1.00 | 0.00 |
| TER  |      |     |     |     |         |         |         |      |      |
| END  |      |     |     |     |         |         |         |      |      |

**Table D:** The number of atoms present in the system of AH-Sum

|      |   |   |     |   |        |         |        |      |      |
|------|---|---|-----|---|--------|---------|--------|------|------|
| ATOM | 1 | N | GLY | 1 | 25.126 | -11.130 | -1.248 | 1.00 | 0.00 |
|------|---|---|-----|---|--------|---------|--------|------|------|

|      |    |     |     |   |        |         |        |      |      |
|------|----|-----|-----|---|--------|---------|--------|------|------|
| ATOM | 2  | H1  | GLY | 1 | 24.425 | -10.415 | -1.372 | 1.00 | 0.00 |
| ATOM | 3  | H2  | GLY | 1 | 24.741 | -12.017 | -1.540 | 1.00 | 0.00 |
| ATOM | 4  | H3  | GLY | 1 | 25.997 | -10.804 | -1.643 | 1.00 | 0.00 |
| ATOM | 5  | CA  | GLY | 1 | 25.386 | -11.275 | 0.212  | 1.00 | 0.00 |
| ATOM | 6  | HA2 | GLY | 1 | 25.154 | -12.291 | 0.533  | 1.00 | 0.00 |
| ATOM | 7  | HA3 | GLY | 1 | 26.432 | -11.057 | 0.428  | 1.00 | 0.00 |
| ATOM | 8  | C   | GLY | 1 | 24.502 | -10.294 | 0.986  | 1.00 | 0.00 |
| ATOM | 9  | O   | GLY | 1 | 24.973 | -9.305  | 1.513  | 1.00 | 0.00 |
| ATOM | 10 | N   | PRO | 2 | 23.195 | -10.579 | 1.052  | 1.00 | 0.00 |
| ATOM | 11 | CD  | PRO | 2 | 22.552 | -11.755 | 0.440  | 1.00 | 0.00 |
| ATOM | 12 | HD2 | PRO | 2 | 23.113 | -12.653 | 0.701  | 1.00 | 0.00 |
| ATOM | 13 | HD3 | PRO | 2 | 22.538 | -11.639 | -0.644 | 1.00 | 0.00 |
| ATOM | 14 | CG  | PRO | 2 | 21.173 | -11.742 | 1.035  | 1.00 | 0.00 |
| ATOM | 15 | HG2 | PRO | 2 | 21.157 | -12.376 | 1.922  | 1.00 | 0.00 |
| ATOM | 16 | HG3 | PRO | 2 | 20.461 | -12.124 | 0.304  | 1.00 | 0.00 |
| ATOM | 17 | CB  | PRO | 2 | 20.877 | -10.321 | 1.375  | 1.00 | 0.00 |
| ATOM | 18 | HB2 | PRO | 2 | 20.208 | -10.307 | 2.235  | 1.00 | 0.00 |
| ATOM | 19 | HB3 | PRO | 2 | 20.436 | -9.744  | 0.562  | 1.00 | 0.00 |
| ATOM | 20 | CA  | PRO | 2 | 22.231 | -9.727  | 1.761  | 1.00 | 0.00 |
| ATOM | 21 | HA  | PRO | 2 | 22.370 | -8.700  | 1.425  | 1.00 | 0.00 |
| ATOM | 22 | C   | PRO | 2 | 22.420 | -9.797  | 3.279  | 1.00 | 0.00 |
| ATOM | 23 | O   | PRO | 2 | 21.975 | -8.934  | 4.010  | 1.00 | 0.00 |

|      |    |     |     |   |        |         |       |      |      |
|------|----|-----|-----|---|--------|---------|-------|------|------|
| ATOM | 24 | N   | MET | 3 | 23.076 | -10.818 | 3.758 | 1.00 | 0.00 |
| ATOM | 25 | H   | MET | 3 | 23.449 | -11.540 | 3.157 | 1.00 | 0.00 |
| ATOM | 26 | CA  | MET | 3 | 23.291 | -10.941 | 5.228 | 1.00 | 0.00 |
| ATOM | 27 | HA  | MET | 3 | 22.335 | -11.029 | 5.744 | 1.00 | 0.00 |
| ATOM | 28 | CB  | MET | 3 | 24.120 | -12.194 | 5.518 | 1.00 | 0.00 |
| ATOM | 29 | HB2 | MET | 3 | 25.053 | -12.152 | 4.955 | 1.00 | 0.00 |
| ATOM | 30 | HB3 | MET | 3 | 24.342 | -12.246 | 6.584 | 1.00 | 0.00 |
| ATOM | 31 | CG  | MET | 3 | 23.329 | -13.436 | 5.101 | 1.00 | 0.00 |
| ATOM | 32 | HG2 | MET | 3 | 23.142 | -13.411 | 4.027 | 1.00 | 0.00 |
| ATOM | 33 | HG3 | MET | 3 | 23.895 | -14.334 | 5.350 | 1.00 | 0.00 |
| ATOM | 34 | SD  | MET | 3 | 21.747 | -13.467 | 5.980 | 1.00 | 0.00 |
| ATOM | 35 | CE  | MET | 3 | 22.421 | -13.545 | 7.658 | 1.00 | 0.00 |
| ATOM | 36 | HE1 | MET | 3 | 23.038 | -12.666 | 7.844 | 1.00 | 0.00 |
| ATOM | 37 | HE2 | MET | 3 | 21.603 | -13.573 | 8.378 | 1.00 | 0.00 |
| ATOM | 38 | HE3 | MET | 3 | 23.029 | -14.444 | 7.765 | 1.00 | 0.00 |
| ATOM | 39 | C   | MET | 3 | 24.035 | -9.706  | 5.739 | 1.00 | 0.00 |
| ATOM | 40 | O   | MET | 3 | 23.789 | -9.228  | 6.829 | 1.00 | 0.00 |
| ATOM | 41 | N   | ARG | 4 | 24.945 | -9.185  | 4.961 | 1.00 | 0.00 |
| ATOM | 42 | H   | ARG | 4 | 25.157 | -9.578  | 4.055 | 1.00 | 0.00 |
| ATOM | 43 | CA  | ARG | 4 | 25.702 | -7.981  | 5.403 | 1.00 | 0.00 |
| ATOM | 44 | HA  | ARG | 4 | 26.286 | -8.209  | 6.295 | 1.00 | 0.00 |
| ATOM | 45 | CB  | ARG | 4 | 26.657 | -7.541  | 4.292 | 1.00 | 0.00 |

|      |    |          |   |        |        |       |      |      |
|------|----|----------|---|--------|--------|-------|------|------|
| ATOM | 46 | HB2 ARG  | 4 | 26.094 | -7.374 | 3.374 | 1.00 | 0.00 |
| ATOM | 47 | HB3 ARG  | 4 | 27.155 | -6.617 | 4.586 | 1.00 | 0.00 |
| ATOM | 48 | CG ARG   | 4 | 27.704 | -8.631 | 4.056 | 1.00 | 0.00 |
| ATOM | 49 | HG2 ARG  | 4 | 28.209 | -8.860 | 4.994 | 1.00 | 0.00 |
| ATOM | 50 | HG3 ARG  | 4 | 27.216 | -9.530 | 3.679 | 1.00 | 0.00 |
| ATOM | 51 | CD ARG   | 4 | 28.729 | -8.140 | 3.032 | 1.00 | 0.00 |
| ATOM | 52 | HD2 ARG  | 4 | 29.251 | -7.262 | 3.412 | 1.00 | 0.00 |
| ATOM | 53 | HD3 ARG  | 4 | 29.452 | -8.927 | 2.815 | 1.00 | 0.00 |
| ATOM | 54 | NE ARG   | 4 | 28.032 | -7.771 | 1.769 | 1.00 | 0.00 |
| ATOM | 55 | HE ARG   | 4 | 27.685 | -8.476 | 1.134 | 1.00 | 0.00 |
| ATOM | 56 | CZ ARG   | 4 | 27.858 | -6.514 | 1.461 | 1.00 | 0.00 |
| ATOM | 57 | NH1 ARG  | 4 | 28.857 | -5.678 | 1.545 | 1.00 | 0.00 |
| ATOM | 58 | HH11 ARG | 4 | 29.763 | -6.007 | 1.848 | 1.00 | 0.00 |
| ATOM | 59 | HH12 ARG | 4 | 28.720 | -4.707 | 1.306 | 1.00 | 0.00 |
| ATOM | 60 | NH2 ARG  | 4 | 26.687 | -6.093 | 1.070 | 1.00 | 0.00 |
| ATOM | 61 | HH21 ARG | 4 | 25.916 | -6.743 | 1.006 | 1.00 | 0.00 |
| ATOM | 62 | HH22 ARG | 4 | 26.557 | -5.120 | 0.833 | 1.00 | 0.00 |
| ATOM | 63 | C ARG    | 4 | 24.723 | -6.847 | 5.711 | 1.00 | 0.00 |
| ATOM | 64 | O ARG    | 4 | 24.918 | -6.077 | 6.630 | 1.00 | 0.00 |
| ATOM | 65 | N ARG    | 5 | 23.669 | -6.738 | 4.948 | 1.00 | 0.00 |
| ATOM | 66 | H ARG    | 5 | 23.501 | -7.374 | 4.181 | 1.00 | 0.00 |
| ATOM | 67 | CA ARG   | 5 | 22.678 | -5.654 | 5.198 | 1.00 | 0.00 |

|      |    |      |     |   |        |        |        |      |      |
|------|----|------|-----|---|--------|--------|--------|------|------|
| ATOM | 68 | HA   | ARG | 5 | 23.150 | -4.678 | 5.091  | 1.00 | 0.00 |
| ATOM | 69 | CB   | ARG | 5 | 21.539 | -5.761 | 4.181  | 1.00 | 0.00 |
| ATOM | 70 | HB2  | ARG | 5 | 21.087 | -6.751 | 4.244  | 1.00 | 0.00 |
| ATOM | 71 | HB3  | ARG | 5 | 20.786 | -5.003 | 4.397  | 1.00 | 0.00 |
| ATOM | 72 | CG   | ARG | 5 | 22.092 | -5.543 | 2.771  | 1.00 | 0.00 |
| ATOM | 73 | HG2  | ARG | 5 | 22.604 | -4.582 | 2.725  | 1.00 | 0.00 |
| ATOM | 74 | HG3  | ARG | 5 | 22.795 | -6.341 | 2.528  | 1.00 | 0.00 |
| ATOM | 75 | CD   | ARG | 5 | 20.940 | -5.555 | 1.765  | 1.00 | 0.00 |
| ATOM | 76 | HD2  | ARG | 5 | 20.342 | -6.458 | 1.887  | 1.00 | 0.00 |
| ATOM | 77 | HD3  | ARG | 5 | 20.308 | -4.679 | 1.905  | 1.00 | 0.00 |
| ATOM | 78 | NE   | ARG | 5 | 21.490 | -5.531 | 0.380  | 1.00 | 0.00 |
| ATOM | 79 | HE   | ARG | 5 | 22.017 | -4.742 | 0.035  | 1.00 | 0.00 |
| ATOM | 80 | CZ   | ARG | 5 | 21.295 | -6.546 | -0.417 | 1.00 | 0.00 |
| ATOM | 81 | NH1  | ARG | 5 | 20.094 | -7.033 | -0.573 | 1.00 | 0.00 |
| ATOM | 82 | HH11 | ARG | 5 | 19.317 | -6.622 | -0.075 | 1.00 | 0.00 |
| ATOM | 83 | HH12 | ARG | 5 | 19.947 | -7.819 | -1.191 | 1.00 | 0.00 |
| ATOM | 84 | NH2  | ARG | 5 | 22.301 | -7.074 | -1.058 | 1.00 | 0.00 |
| ATOM | 85 | HH21 | ARG | 5 | 23.229 | -6.695 | -0.935 | 1.00 | 0.00 |
| ATOM | 86 | HH22 | ARG | 5 | 22.147 | -7.860 | -1.674 | 1.00 | 0.00 |
| ATOM | 87 | C    | ARG | 5 | 22.114 | -5.792 | 6.613  | 1.00 | 0.00 |
| ATOM | 88 | O    | ARG | 5 | 21.762 | -4.818 | 7.248  | 1.00 | 0.00 |
| ATOM | 89 | N    | GLU | 6 | 22.024 | -6.995 | 7.111  | 1.00 | 0.00 |

|      |     |     |     |   |        |         |        |      |      |
|------|-----|-----|-----|---|--------|---------|--------|------|------|
| ATOM | 90  | H   | GLU | 6 | 22.314 | -7.810  | 6.588  | 1.00 | 0.00 |
| ATOM | 91  | CA  | GLU | 6 | 21.482 | -7.193  | 8.485  | 1.00 | 0.00 |
| ATOM | 92  | HA  | GLU | 6 | 20.458 | -6.825  | 8.544  | 1.00 | 0.00 |
| ATOM | 93  | CB  | GLU | 6 | 21.486 | -8.685  | 8.826  | 1.00 | 0.00 |
| ATOM | 94  | HB2 | GLU | 6 | 22.497 | -9.080  | 8.721  | 1.00 | 0.00 |
| ATOM | 95  | HB3 | GLU | 6 | 21.147 | -8.825  | 9.853  | 1.00 | 0.00 |
| ATOM | 96  | CG  | GLU | 6 | 20.547 | -9.428  | 7.874  | 1.00 | 0.00 |
| ATOM | 97  | HG2 | GLU | 6 | 19.542 | -9.015  | 7.955  | 1.00 | 0.00 |
| ATOM | 98  | HG3 | GLU | 6 | 20.904 | -9.315  | 6.850  | 1.00 | 0.00 |
| ATOM | 99  | CD  | GLU | 6 | 20.519 | -10.912 | 8.242  | 1.00 | 0.00 |
| ATOM | 100 | OE1 | GLU | 6 | 21.317 | -11.313 | 9.073  | 1.00 | 0.00 |
| ATOM | 101 | OE2 | GLU | 6 | 19.697 | -11.624 | 7.687  | 1.00 | 0.00 |
| ATOM | 102 | C   | GLU | 6 | 22.354 | -6.437  | 9.490  | 1.00 | 0.00 |
| ATOM | 103 | O   | GLU | 6 | 21.879 | -5.960  | 10.502 | 1.00 | 0.00 |
| ATOM | 104 | N   | ARG | 7 | 23.625 | -6.323  | 9.220  | 1.00 | 0.00 |
| ATOM | 105 | H   | ARG | 7 | 24.027 | -6.718  | 8.381  | 1.00 | 0.00 |
| ATOM | 106 | CA  | ARG | 7 | 24.524 | -5.597  | 10.160 | 1.00 | 0.00 |
| ATOM | 107 | HA  | ARG | 7 | 24.626 | -6.154  | 11.091 | 1.00 | 0.00 |
| ATOM | 108 | CB  | ARG | 7 | 25.909 | -5.444  | 9.528  | 1.00 | 0.00 |
| ATOM | 109 | HB2 | ARG | 7 | 26.280 | -6.423  | 9.224  | 1.00 | 0.00 |
| ATOM | 110 | HB3 | ARG | 7 | 25.841 | -4.795  | 8.655  | 1.00 | 0.00 |
| ATOM | 111 | CG  | ARG | 7 | 26.870 | -4.829  | 10.547 | 1.00 | 0.00 |

|      |     |      |     |   |        |        |        |      |      |
|------|-----|------|-----|---|--------|--------|--------|------|------|
| ATOM | 112 | HG2  | ARG | 7 | 26.482 | -3.866 | 10.878 | 1.00 | 0.00 |
| ATOM | 113 | HG3  | ARG | 7 | 26.967 | -5.496 | 11.404 | 1.00 | 0.00 |
| ATOM | 114 | CD   | ARG | 7 | 28.242 | -4.630 | 9.899  | 1.00 | 0.00 |
| ATOM | 115 | HD2  | ARG | 7 | 28.604 | -5.571 | 9.484  | 1.00 | 0.00 |
| ATOM | 116 | HD3  | ARG | 7 | 28.181 | -3.884 | 9.107  | 1.00 | 0.00 |
| ATOM | 117 | NE   | ARG | 7 | 29.212 | -4.157 | 10.927 | 1.00 | 0.00 |
| ATOM | 118 | HE   | ARG | 7 | 29.640 | -4.796 | 11.583 | 1.00 | 0.00 |
| ATOM | 119 | CZ   | ARG | 7 | 29.526 | -2.892 | 10.994 | 1.00 | 0.00 |
| ATOM | 120 | NH1  | ARG | 7 | 28.935 | -2.119 | 11.863 | 1.00 | 0.00 |
| ATOM | 121 | HH11 | ARG | 7 | 28.236 | -2.503 | 12.482 | 1.00 | 0.00 |
| ATOM | 122 | HH12 | ARG | 7 | 29.180 | -1.141 | 11.913 | 1.00 | 0.00 |
| ATOM | 123 | NH2  | ARG | 7 | 30.431 | -2.401 | 10.192 | 1.00 | 0.00 |
| ATOM | 124 | HH21 | ARG | 7 | 30.887 | -3.003 | 9.521  | 1.00 | 0.00 |
| ATOM | 125 | HH22 | ARG | 7 | 30.672 | -1.422 | 10.246 | 1.00 | 0.00 |
| ATOM | 126 | C    | ARG | 7 | 23.943 | -4.213 | 10.455 | 1.00 | 0.00 |
| ATOM | 127 | O    | ARG | 7 | 23.964 | -3.744 | 11.576 | 1.00 | 0.00 |
| ATOM | 128 | N    | GLY | 8 | 23.422 | -3.554 | 9.456  | 1.00 | 0.00 |
| ATOM | 129 | H    | GLY | 8 | 23.400 | -3.937 | 8.522  | 1.00 | 0.00 |
| ATOM | 130 | CA   | GLY | 8 | 22.840 | -2.200 | 9.679  | 1.00 | 0.00 |
| ATOM | 131 | HA2  | GLY | 8 | 23.616 | -1.512 | 10.013 | 1.00 | 0.00 |
| ATOM | 132 | HA3  | GLY | 8 | 22.398 | -1.828 | 8.755  | 1.00 | 0.00 |
| ATOM | 133 | C    | GLY | 8 | 21.753 | -2.284 | 10.752 | 1.00 | 0.00 |

|      |     |      |     |   |        |        |        |      |      |
|------|-----|------|-----|---|--------|--------|--------|------|------|
| ATOM | 134 | O    | GLY | 8 | 21.539 | -1.355 | 11.505 | 1.00 | 0.00 |
| ATOM | 135 | N    | ARG | 9 | 21.062 | -3.389 | 10.827 | 1.00 | 0.00 |
| ATOM | 136 | H    | ARG | 9 | 21.232 | -4.165 | 10.203 | 1.00 | 0.00 |
| ATOM | 137 | CA   | ARG | 9 | 19.990 | -3.529 | 11.853 | 1.00 | 0.00 |
| ATOM | 138 | HA   | ARG | 9 | 19.190 | -2.814 | 11.664 | 1.00 | 0.00 |
| ATOM | 139 | CB   | ARG | 9 | 19.408 | -4.942 | 11.792 | 1.00 | 0.00 |
| ATOM | 140 | HB2  | ARG | 9 | 19.045 | -5.144 | 10.784 | 1.00 | 0.00 |
| ATOM | 141 | HB3  | ARG | 9 | 20.181 | -5.666 | 12.050 | 1.00 | 0.00 |
| ATOM | 142 | CG   | ARG | 9 | 18.249 | -5.058 | 12.785 | 1.00 | 0.00 |
| ATOM | 143 | HG2  | ARG | 9 | 18.604 | -4.820 | 13.788 | 1.00 | 0.00 |
| ATOM | 144 | HG3  | ARG | 9 | 17.459 | -4.362 | 12.504 | 1.00 | 0.00 |
| ATOM | 145 | CD   | ARG | 9 | 17.701 | -6.487 | 12.765 | 1.00 | 0.00 |
| ATOM | 146 | HD2  | ARG | 9 | 17.418 | -6.769 | 11.751 | 1.00 | 0.00 |
| ATOM | 147 | HD3  | ARG | 9 | 18.451 | -7.185 | 13.139 | 1.00 | 0.00 |
| ATOM | 148 | NE   | ARG | 9 | 16.496 | -6.569 | 13.638 | 1.00 | 0.00 |
| ATOM | 149 | HE   | ARG | 9 | 15.643 | -6.081 | 13.408 | 1.00 | 0.00 |
| ATOM | 150 | CZ   | ARG | 9 | 16.529 | -7.285 | 14.728 | 1.00 | 0.00 |
| ATOM | 151 | NH1  | ARG | 9 | 17.003 | -8.500 | 14.698 | 1.00 | 0.00 |
| ATOM | 152 | HH11 | ARG | 9 | 17.344 | -8.885 | 13.828 | 1.00 | 0.00 |
| ATOM | 153 | HH12 | ARG | 9 | 17.027 | -9.051 | 15.544 | 1.00 | 0.00 |
| ATOM | 154 | NH2  | ARG | 9 | 16.088 | -6.784 | 15.850 | 1.00 | 0.00 |
| ATOM | 155 | HH21 | ARG | 9 | 15.723 | -5.843 | 15.870 | 1.00 | 0.00 |



|      |     |      |     |    |        |        |        |      |      |
|------|-----|------|-----|----|--------|--------|--------|------|------|
| ATOM | 156 | HH22 | ARG | 9  | 16.115 | -7.340 | 16.693 | 1.00 | 0.00 |
| ATOM | 157 | C    | ARG | 9  | 20.580 | -3.278 | 13.242 | 1.00 | 0.00 |
| ATOM | 158 | O    | ARG | 9  | 19.931 | -2.733 | 14.113 | 1.00 | 0.00 |
| ATOM | 159 | N    | GLN | 10 | 21.806 | -3.673 | 13.457 | 1.00 | 0.00 |
| ATOM | 160 | H    | GLN | 10 | 22.352 | -4.127 | 12.738 | 1.00 | 0.00 |
| ATOM | 161 | CA   | GLN | 10 | 22.435 | -3.457 | 14.790 | 1.00 | 0.00 |
| ATOM | 162 | HA   | GLN | 10 | 21.920 | -4.043 | 15.552 | 1.00 | 0.00 |
| ATOM | 163 | CB   | GLN | 10 | 23.898 | -3.901 | 14.739 | 1.00 | 0.00 |
| ATOM | 164 | HB2  | GLN | 10 | 24.405 | -3.391 | 13.920 | 1.00 | 0.00 |
| ATOM | 165 | HB3  | GLN | 10 | 24.388 | -3.651 | 15.680 | 1.00 | 0.00 |
| ATOM | 166 | CG   | GLN | 10 | 23.965 | -5.414 | 14.517 | 1.00 | 0.00 |
| ATOM | 167 | HG2  | GLN | 10 | 23.385 | -5.934 | 15.280 | 1.00 | 0.00 |
| ATOM | 168 | HG3  | GLN | 10 | 23.578 | -5.670 | 13.530 | 1.00 | 0.00 |
| ATOM | 169 | CD   | GLN | 10 | 25.419 | -5.879 | 14.607 | 1.00 | 0.00 |
| ATOM | 170 | OE1  | GLN | 10 | 26.080 | -6.131 | 13.510 | 1.00 | 0.00 |
| ATOM | 171 | NE2  | GLN | 10 | 25.960 | -6.015 | 15.686 | 1.00 | 0.00 |
| ATOM | 172 | HE21 | GLN | 10 | 26.921 | -6.323 | 15.730 | 1.00 | 0.00 |
| ATOM | 173 | HE22 | GLN | 10 | 25.446 | -5.820 | 16.533 | 1.00 | 0.00 |
| ATOM | 174 | C    | GLN | 10 | 22.365 | -1.972 | 15.152 | 1.00 | 0.00 |
| ATOM | 175 | O    | GLN | 10 | 22.207 | -1.611 | 16.301 | 1.00 | 0.00 |
| ATOM | 176 | N    | GLY | 11 | 22.482 | -1.109 | 14.181 | 1.00 | 0.00 |
| ATOM | 177 | H    | GLY | 11 | 22.614 | -1.403 | 13.224 | 1.00 | 0.00 |

|      |     |     |     |    |        |        |        |      |      |
|------|-----|-----|-----|----|--------|--------|--------|------|------|
| ATOM | 178 | CA  | GLY | 11 | 22.423 | 0.352  | 14.470 | 1.00 | 0.00 |
| ATOM | 179 | HA2 | GLY | 11 | 23.293 | 0.651  | 15.055 | 1.00 | 0.00 |
| ATOM | 180 | HA3 | GLY | 11 | 22.401 | 0.915  | 13.537 | 1.00 | 0.00 |
| ATOM | 181 | C   | GLY | 11 | 21.155 | 0.662  | 15.269 | 1.00 | 0.00 |
| ATOM | 182 | O   | GLY | 11 | 21.148 | 1.517  | 16.131 | 1.00 | 0.00 |
| ATOM | 183 | N   | ASP | 12 | 20.083 | -0.027 | 14.988 | 1.00 | 0.00 |
| ATOM | 184 | H   | ASP | 12 | 20.081 | -0.739 | 14.271 | 1.00 | 0.00 |
| ATOM | 185 | CA  | ASP | 12 | 18.818 | 0.230  | 15.733 | 1.00 | 0.00 |
| ATOM | 186 | HA  | ASP | 12 | 18.008 | -0.373 | 15.321 | 1.00 | 0.00 |
| ATOM | 187 | CB  | ASP | 12 | 19.006 | -0.144 | 17.204 | 1.00 | 0.00 |
| ATOM | 188 | HB2 | ASP | 12 | 19.859 | 0.399  | 17.612 | 1.00 | 0.00 |
| ATOM | 189 | HB3 | ASP | 12 | 18.108 | 0.117  | 17.763 | 1.00 | 0.00 |
| ATOM | 190 | CG  | ASP | 12 | 19.258 | -1.649 | 17.319 | 1.00 | 0.00 |
| ATOM | 191 | OD1 | ASP | 12 | 19.020 | -2.345 | 16.346 | 1.00 | 0.00 |
| ATOM | 192 | OD2 | ASP | 12 | 19.685 | -2.079 | 18.378 | 1.00 | 0.00 |
| ATOM | 193 | C   | ASP | 12 | 18.454 | 1.712  | 15.626 | 1.00 | 0.00 |
| ATOM | 194 | O   | ASP | 12 | 18.136 | 2.355  | 16.606 | 1.00 | 0.00 |
| ATOM | 195 | N   | SER | 13 | 18.499 | 2.260  | 14.442 | 1.00 | 0.00 |
| ATOM | 196 | H   | SER | 13 | 18.763 | 1.732  | 13.622 | 1.00 | 0.00 |
| ATOM | 197 | CA  | SER | 13 | 18.155 | 3.700  | 14.275 | 1.00 | 0.00 |
| ATOM | 198 | HA  | SER | 13 | 18.868 | 4.324  | 14.814 | 1.00 | 0.00 |
| ATOM | 199 | CB  | SER | 13 | 18.208 | 4.068  | 12.791 | 1.00 | 0.00 |

|      |     |     |     |    |        |        |        |      |      |
|------|-----|-----|-----|----|--------|--------|--------|------|------|
| ATOM | 200 | HB2 | SER | 13 | 17.446 | 3.507  | 12.249 | 1.00 | 0.00 |
| ATOM | 201 | HB3 | SER | 13 | 18.025 | 5.136  | 12.674 | 1.00 | 0.00 |
| ATOM | 202 | OG  | SER | 13 | 19.490 | 3.748  | 12.270 | 1.00 | 0.00 |
| ATOM | 203 | HG  | SER | 13 | 19.524 | 3.978  | 11.339 | 1.00 | 0.00 |
| ATOM | 204 | C   | SER | 13 | 16.745 | 3.951  | 14.813 | 1.00 | 0.00 |
| ATOM | 205 | O   | SER | 13 | 16.472 | 4.972  | 15.413 | 1.00 | 0.00 |
| ATOM | 206 | N   | SER | 14 | 15.848 | 3.027  | 14.603 | 1.00 | 0.00 |
| ATOM | 207 | H   | SER | 14 | 16.070 | 2.175  | 14.106 | 1.00 | 0.00 |
| ATOM | 208 | CA  | SER | 14 | 14.455 | 3.212  | 15.103 | 1.00 | 0.00 |
| ATOM | 209 | HA  | SER | 14 | 14.458 | 3.794  | 16.024 | 1.00 | 0.00 |
| ATOM | 210 | CB  | SER | 14 | 13.632 | 3.961  | 14.053 | 1.00 | 0.00 |
| ATOM | 211 | HB2 | SER | 14 | 14.049 | 4.957  | 13.907 | 1.00 | 0.00 |
| ATOM | 212 | HB3 | SER | 14 | 13.660 | 3.414  | 13.110 | 1.00 | 0.00 |
| ATOM | 213 | OG  | SER | 14 | 12.287 | 4.071  | 14.497 | 1.00 | 0.00 |
| ATOM | 214 | HG  | SER | 14 | 11.770 | 4.540  | 13.838 | 1.00 | 0.00 |
| ATOM | 215 | C   | SER | 14 | 13.825 | 1.842  | 15.363 | 1.00 | 0.00 |
| ATOM | 216 | O   | SER | 14 | 13.914 | 0.942  | 14.553 | 1.00 | 0.00 |
| ATOM | 217 | N   | SER | 15 | 13.189 | 1.677  | 16.492 | 1.00 | 0.00 |
| ATOM | 218 | H   | SER | 15 | 13.112 | 2.419  | 17.173 | 1.00 | 0.00 |
| ATOM | 219 | CA  | SER | 15 | 12.556 | 0.365  | 16.803 | 1.00 | 0.00 |
| ATOM | 220 | HA  | SER | 15 | 13.240 | -0.451 | 16.568 | 1.00 | 0.00 |
| ATOM | 221 | CB  | SER | 15 | 12.216 | 0.304  | 18.294 | 1.00 | 0.00 |

|      |     |     |     |    |        |        |        |      |      |
|------|-----|-----|-----|----|--------|--------|--------|------|------|
| ATOM | 222 | HB2 | SER | 15 | 11.879 | -0.701 | 18.550 | 1.00 | 0.00 |
| ATOM | 223 | HB3 | SER | 15 | 13.102 | 0.549  | 18.880 | 1.00 | 0.00 |
| ATOM | 224 | OG  | SER | 15 | 11.185 | 1.237  | 18.582 | 1.00 | 0.00 |
| ATOM | 225 | HG  | SER | 15 | 10.972 | 1.199  | 19.517 | 1.00 | 0.00 |
| ATOM | 226 | C   | SER | 15 | 11.276 | 0.204  | 15.980 | 1.00 | 0.00 |
| ATOM | 227 | O   | SER | 15 | 10.856 | -0.895 | 15.678 | 1.00 | 0.00 |
| ATOM | 228 | N   | CYX | 16 | 10.653 | 1.292  | 15.613 | 1.00 | 0.00 |
| ATOM | 229 | H   | CYX | 16 | 10.995 | 2.209  | 15.860 | 1.00 | 0.00 |
| ATOM | 230 | CA  | CYX | 16 | 9.403  | 1.197  | 14.807 | 1.00 | 0.00 |
| ATOM | 231 | HA  | CYX | 16 | 8.642  | 0.641  | 15.355 | 1.00 | 0.00 |
| ATOM | 232 | CB  | CYX | 16 | 8.871  | 2.602  | 14.520 | 1.00 | 0.00 |
| ATOM | 233 | HB2 | CYX | 16 | 8.894  | 3.193  | 15.435 | 1.00 | 0.00 |
| ATOM | 234 | HB3 | CYX | 16 | 9.494  | 3.079  | 13.764 | 1.00 | 0.00 |
| ATOM | 235 | SG  | CYX | 16 | 7.148  | 2.496  | 13.973 | 1.00 | 0.00 |
| ATOM | 236 | C   | CYX | 16 | 9.704  | 0.486  | 13.486 | 1.00 | 0.00 |
| ATOM | 237 | O   | CYX | 16 | 8.834  | -0.100 | 12.873 | 1.00 | 0.00 |
| ATOM | 238 | N   | GLU | 17 | 10.930 | 0.533  | 13.043 | 1.00 | 0.00 |
| ATOM | 239 | H   | GLU | 17 | 11.658 | 1.018  | 13.547 | 1.00 | 0.00 |
| ATOM | 240 | CA  | GLU | 17 | 11.286 | -0.140 | 11.763 | 1.00 | 0.00 |
| ATOM | 241 | HA  | GLU | 17 | 10.686 | 0.259  | 10.945 | 1.00 | 0.00 |
| ATOM | 242 | CB  | GLU | 17 | 12.763 | 0.108  | 11.452 | 1.00 | 0.00 |
| ATOM | 243 | HB2 | GLU | 17 | 13.354 | -0.025 | 12.359 | 1.00 | 0.00 |

|      |     |     |     |    |        |        |        |      |      |
|------|-----|-----|-----|----|--------|--------|--------|------|------|
| ATOM | 244 | HB3 | GLU | 17 | 13.099 | -0.599 | 10.693 | 1.00 | 0.00 |
| ATOM | 245 | CG  | GLU | 17 | 12.941 | 1.537  | 10.932 | 1.00 | 0.00 |
| ATOM | 246 | HG2 | GLU | 17 | 12.315 | 1.684  | 10.052 | 1.00 | 0.00 |
| ATOM | 247 | HG3 | GLU | 17 | 12.650 | 2.245  | 11.707 | 1.00 | 0.00 |
| ATOM | 248 | CD  | GLU | 17 | 14.407 | 1.764  | 10.558 | 1.00 | 0.00 |
| ATOM | 249 | OE1 | GLU | 17 | 15.178 | 0.826  | 10.666 | 1.00 | 0.00 |
| ATOM | 250 | OE2 | GLU | 17 | 14.733 | 2.874  | 10.170 | 1.00 | 0.00 |
| ATOM | 251 | C   | GLU | 17 | 11.036 | -1.644 | 11.892 | 1.00 | 0.00 |
| ATOM | 252 | O   | GLU | 17 | 10.420 | -2.255 | 11.041 | 1.00 | 0.00 |
| ATOM | 253 | N   | ARG | 18 | 11.509 | -2.246 | 12.949 | 1.00 | 0.00 |
| ATOM | 254 | H   | ARG | 18 | 12.021 | -1.745 | 13.661 | 1.00 | 0.00 |
| ATOM | 255 | CA  | ARG | 18 | 11.298 | -3.711 | 13.130 | 1.00 | 0.00 |
| ATOM | 256 | HA  | ARG | 18 | 11.879 | -4.270 | 12.396 | 1.00 | 0.00 |
| ATOM | 257 | CB  | ARG | 18 | 11.754 | -4.124 | 14.531 | 1.00 | 0.00 |
| ATOM | 258 | HB2 | ARG | 18 | 12.809 | -3.880 | 14.658 | 1.00 | 0.00 |
| ATOM | 259 | HB3 | ARG | 18 | 11.166 | -3.591 | 15.278 | 1.00 | 0.00 |
| ATOM | 260 | CG  | ARG | 18 | 11.556 | -5.631 | 14.707 | 1.00 | 0.00 |
| ATOM | 261 | HG2 | ARG | 18 | 10.508 | -5.882 | 14.546 | 1.00 | 0.00 |
| ATOM | 262 | HG3 | ARG | 18 | 12.172 | -6.166 | 13.984 | 1.00 | 0.00 |
| ATOM | 263 | CD  | ARG | 18 | 11.965 | -6.037 | 16.125 | 1.00 | 0.00 |
| ATOM | 264 | HD2 | ARG | 18 | 12.036 | -7.122 | 16.201 | 1.00 | 0.00 |
| ATOM | 265 | HD3 | ARG | 18 | 12.926 | -5.592 | 16.382 | 1.00 | 0.00 |

|      |     |      |     |    |        |        |        |      |      |
|------|-----|------|-----|----|--------|--------|--------|------|------|
| ATOM | 266 | NE   | ARG | 18 | 10.941 | -5.556 | 17.095 | 1.00 | 0.00 |
| ATOM | 267 | HE   | ARG | 18 | 10.183 | -4.955 | 16.806 | 1.00 | 0.00 |
| ATOM | 268 | CZ   | ARG | 18 | 11.013 | -5.909 | 18.350 | 1.00 | 0.00 |
| ATOM | 269 | NH1  | ARG | 18 | 11.513 | -5.087 | 19.232 | 1.00 | 0.00 |
| ATOM | 270 | HH11 | ARG | 18 | 11.844 | -4.179 | 18.940 | 1.00 | 0.00 |
| ATOM | 271 | HH12 | ARG | 18 | 11.567 | -5.364 | 20.202 | 1.00 | 0.00 |
| ATOM | 272 | NH2  | ARG | 18 | 10.586 | -7.085 | 18.721 | 1.00 | 0.00 |
| ATOM | 273 | HH21 | ARG | 18 | 10.201 | -7.719 | 18.035 | 1.00 | 0.00 |
| ATOM | 274 | HH22 | ARG | 18 | 10.643 | -7.357 | 19.692 | 1.00 | 0.00 |
| ATOM | 275 | C    | ARG | 18 | 9.812  | -4.036 | 12.962 | 1.00 | 0.00 |
| ATOM | 276 | O    | ARG | 18 | 9.440  | -5.162 | 12.695 | 1.00 | 0.00 |
| ATOM | 277 | N    | GLN | 19 | 8.959  | -3.061 | 13.119 | 1.00 | 0.00 |
| ATOM | 278 | H    | GLN | 19 | 9.260  | -2.124 | 13.343 | 1.00 | 0.00 |
| ATOM | 279 | CA   | GLN | 19 | 7.500  | -3.318 | 12.971 | 1.00 | 0.00 |
| ATOM | 280 | HA   | GLN | 19 | 7.228  | -4.250 | 13.467 | 1.00 | 0.00 |
| ATOM | 281 | CB   | GLN | 19 | 6.713  | -2.174 | 13.613 | 1.00 | 0.00 |
| ATOM | 282 | HB2  | GLN | 19 | 7.110  | -1.220 | 13.267 | 1.00 | 0.00 |
| ATOM | 283 | HB3  | GLN | 19 | 5.663  | -2.254 | 13.334 | 1.00 | 0.00 |
| ATOM | 284 | CG   | GLN | 19 | 6.844  | -2.258 | 15.135 | 1.00 | 0.00 |
| ATOM | 285 | HG2  | GLN | 19 | 6.585  | -3.259 | 15.481 | 1.00 | 0.00 |
| ATOM | 286 | HG3  | GLN | 19 | 7.863  | -2.021 | 15.441 | 1.00 | 0.00 |
| ATOM | 287 | CD   | GLN | 19 | 5.892  | -1.254 | 15.787 | 1.00 | 0.00 |

|      |     |      |     |    |        |        |        |      |      |
|------|-----|------|-----|----|--------|--------|--------|------|------|
| ATOM | 288 | OE1  | GLN | 19 | 5.413  | -0.344 | 15.140 | 1.00 | 0.00 |
| ATOM | 289 | NE2  | GLN | 19 | 5.595  | -1.380 | 17.052 | 1.00 | 0.00 |
| ATOM | 290 | HE21 | GLN | 19 | 4.967  | -0.721 | 17.488 | 1.00 | 0.00 |
| ATOM | 291 | HE22 | GLN | 19 | 5.995  | -2.137 | 17.588 | 1.00 | 0.00 |
| ATOM | 292 | C    | GLN | 19 | 7.144  | -3.413 | 11.485 | 1.00 | 0.00 |
| ATOM | 293 | O    | GLN | 19 | 6.113  | -3.941 | 11.118 | 1.00 | 0.00 |
| ATOM | 294 | N    | VAL | 20 | 7.988  | -2.909 | 10.626 | 1.00 | 0.00 |
| ATOM | 295 | H    | VAL | 20 | 8.847  | -2.467 | 10.921 | 1.00 | 0.00 |
| ATOM | 296 | CA   | VAL | 20 | 7.692  | -2.975 | 9.167  | 1.00 | 0.00 |
| ATOM | 297 | HA   | VAL | 20 | 6.654  | -2.702 | 8.980  | 1.00 | 0.00 |
| ATOM | 298 | CB   | VAL | 20 | 8.599  | -1.998 | 8.414  | 1.00 | 0.00 |
| ATOM | 299 | HB   | VAL | 20 | 8.607  | -1.040 | 8.932  | 1.00 | 0.00 |
| ATOM | 300 | CG1  | VAL | 20 | 10.022 | -2.557 | 8.354  | 1.00 | 0.00 |
| ATOM | 301 | HG11 | VAL | 20 | 10.015 | -3.516 | 7.835  | 1.00 | 0.00 |
| ATOM | 302 | HG12 | VAL | 20 | 10.665 | -1.860 | 7.817  | 1.00 | 0.00 |
| ATOM | 303 | HG13 | VAL | 20 | 10.402 | -2.695 | 9.366  | 1.00 | 0.00 |
| ATOM | 304 | CG2  | VAL | 20 | 8.069  | -1.804 | 6.992  | 1.00 | 0.00 |
| ATOM | 305 | HG21 | VAL | 20 | 7.057  | -1.403 | 7.033  | 1.00 | 0.00 |
| ATOM | 306 | HG22 | VAL | 20 | 8.714  | -1.109 | 6.455  | 1.00 | 0.00 |
| ATOM | 307 | HG23 | VAL | 20 | 8.058  | -2.763 | 6.474  | 1.00 | 0.00 |
| ATOM | 308 | C    | VAL | 20 | 7.941  | -4.399 | 8.663  | 1.00 | 0.00 |
| ATOM | 309 | O    | VAL | 20 | 7.286  | -4.868 | 7.752  | 1.00 | 0.00 |

|      |     |     |     |    |        |        |        |      |      |
|------|-----|-----|-----|----|--------|--------|--------|------|------|
| ATOM | 310 | N   | ASP | 21 | 8.881  | -5.091 | 9.248  | 1.00 | 0.00 |
| ATOM | 311 | H   | ASP | 21 | 9.430  | -4.707 | 10.004 | 1.00 | 0.00 |
| ATOM | 312 | CA  | ASP | 21 | 9.169  | -6.483 | 8.803  | 1.00 | 0.00 |
| ATOM | 313 | HA  | ASP | 21 | 9.582  | -6.480 | 7.794  | 1.00 | 0.00 |
| ATOM | 314 | CB  | ASP | 21 | 10.190 | -7.119 | 9.746  | 1.00 | 0.00 |
| ATOM | 315 | HB2 | ASP | 21 | 9.880  | -6.962 | 10.779 | 1.00 | 0.00 |
| ATOM | 316 | HB3 | ASP | 21 | 10.254 | -8.189 | 9.545  | 1.00 | 0.00 |
| ATOM | 317 | CG  | ASP | 21 | 11.561 | -6.476 | 9.522  | 1.00 | 0.00 |
| ATOM | 318 | OD1 | ASP | 21 | 11.680 | -5.692 | 8.594  | 1.00 | 0.00 |
| ATOM | 319 | OD2 | ASP | 21 | 12.466 | -6.778 | 10.281 | 1.00 | 0.00 |
| ATOM | 320 | C   | ASP | 21 | 7.877  | -7.303 | 8.821  | 1.00 | 0.00 |
| ATOM | 321 | O   | ASP | 21 | 7.695  | -8.210 | 8.034  | 1.00 | 0.00 |
| ATOM | 322 | N   | ARG | 22 | 6.979  | -6.989 | 9.713  | 1.00 | 0.00 |
| ATOM | 323 | H   | ARG | 22 | 7.124  | -6.237 | 10.371 | 1.00 | 0.00 |
| ATOM | 324 | CA  | ARG | 22 | 5.699  | -7.750 | 9.780  | 1.00 | 0.00 |
| ATOM | 325 | HA  | ARG | 22 | 5.886  | -8.817 | 9.652  | 1.00 | 0.00 |
| ATOM | 326 | CB  | ARG | 22 | 5.044  | -7.528 | 11.146 | 1.00 | 0.00 |
| ATOM | 327 | HB2 | ARG | 22 | 5.764  | -7.747 | 11.935 | 1.00 | 0.00 |
| ATOM | 328 | HB3 | ARG | 22 | 4.719  | -6.492 | 11.229 | 1.00 | 0.00 |
| ATOM | 329 | CG  | ARG | 22 | 3.836  | -8.454 | 11.288 | 1.00 | 0.00 |
| ATOM | 330 | HG2 | ARG | 22 | 3.162  | -8.305 | 10.445 | 1.00 | 0.00 |
| ATOM | 331 | HG3 | ARG | 22 | 4.172  | -9.491 | 11.304 | 1.00 | 0.00 |



|      |     |      |     |    |        |         |        |      |      |
|------|-----|------|-----|----|--------|---------|--------|------|------|
| ATOM | 332 | CD   | ARG | 22 | 3.100  | -8.136  | 12.592 | 1.00 | 0.00 |
| ATOM | 333 | HD2  | ARG | 22 | 3.798  | -8.137  | 13.429 | 1.00 | 0.00 |
| ATOM | 334 | HD3  | ARG | 22 | 2.616  | -7.162  | 12.524 | 1.00 | 0.00 |
| ATOM | 335 | NE   | ARG | 22 | 2.057  | -9.172  | 12.839 | 1.00 | 0.00 |
| ATOM | 336 | HE   | ARG | 22 | 1.932  | -9.590  | 13.750 | 1.00 | 0.00 |
| ATOM | 337 | CZ   | ARG | 22 | 1.280  | -9.559  | 11.864 | 1.00 | 0.00 |
| ATOM | 338 | NH1  | ARG | 22 | 0.046  | -9.136  | 11.806 | 1.00 | 0.00 |
| ATOM | 339 | HH11 | ARG | 22 | -0.304 | -8.510  | 12.517 | 1.00 | 0.00 |
| ATOM | 340 | HH12 | ARG | 22 | -0.553 | -9.438  | 11.050 | 1.00 | 0.00 |
| ATOM | 341 | NH2  | ARG | 22 | 1.735  | -10.369 | 10.948 | 1.00 | 0.00 |
| ATOM | 342 | HH21 | ARG | 22 | 2.690  | -10.696 | 10.996 | 1.00 | 0.00 |
| ATOM | 343 | HH22 | ARG | 22 | 1.131  | -10.666 | 10.195 | 1.00 | 0.00 |
| ATOM | 344 | C    | ARG | 22 | 4.761  | -7.263  | 8.677  | 1.00 | 0.00 |
| ATOM | 345 | O    | ARG | 22 | 3.807  | -7.926  | 8.321  | 1.00 | 0.00 |
| ATOM | 346 | N    | VAL | 23 | 5.023  | -6.107  | 8.131  | 1.00 | 0.00 |
| ATOM | 347 | H    | VAL | 23 | 5.814  | -5.551  | 8.423  | 1.00 | 0.00 |
| ATOM | 348 | CA   | VAL | 23 | 4.147  | -5.576  | 7.049  | 1.00 | 0.00 |
| ATOM | 349 | HA   | VAL | 23 | 3.225  | -5.177  | 7.470  | 1.00 | 0.00 |
| ATOM | 350 | CB   | VAL | 23 | 4.875  | -4.451  | 6.310  | 1.00 | 0.00 |
| ATOM | 351 | HB   | VAL | 23 | 5.882  | -4.778  | 6.050  | 1.00 | 0.00 |
| ATOM | 352 | CG1  | VAL | 23 | 4.108  | -4.100  | 5.033  | 1.00 | 0.00 |
| ATOM | 353 | HG11 | VAL | 23 | 3.101  | -3.773  | 5.292  | 1.00 | 0.00 |

|      |     |          |    |       |         |       |      |      |
|------|-----|----------|----|-------|---------|-------|------|------|
| ATOM | 354 | HG12 VAL | 23 | 4.626 | -3.299  | 4.506 | 1.00 | 0.00 |
| ATOM | 355 | HG13 VAL | 23 | 4.050 | -4.979  | 4.390 | 1.00 | 0.00 |
| ATOM | 356 | CG2 VAL  | 23 | 4.957 | -3.218  | 7.212 | 1.00 | 0.00 |
| ATOM | 357 | HG21 VAL | 23 | 5.504 | -3.469  | 8.121 | 1.00 | 0.00 |
| ATOM | 358 | HG22 VAL | 23 | 5.476 | -2.417  | 6.686 | 1.00 | 0.00 |
| ATOM | 359 | HG23 VAL | 23 | 3.951 | -2.890  | 7.472 | 1.00 | 0.00 |
| ATOM | 360 | C VAL    | 23 | 3.813 | -6.699  | 6.066 | 1.00 | 0.00 |
| ATOM | 361 | O VAL    | 23 | 2.775 | -7.324  | 6.151 | 1.00 | 0.00 |
| ATOM | 362 | N ASN    | 24 | 4.686 | -6.959  | 5.134 | 1.00 | 0.00 |
| ATOM | 363 | H ASN    | 24 | 5.551 | -6.444  | 5.059 | 1.00 | 0.00 |
| ATOM | 364 | CA ASN   | 24 | 4.420 | -8.040  | 4.145 | 1.00 | 0.00 |
| ATOM | 365 | HA ASN   | 24 | 5.190 | -8.046  | 3.374 | 1.00 | 0.00 |
| ATOM | 366 | CB ASN   | 24 | 4.431 | -9.394  | 4.857 | 1.00 | 0.00 |
| ATOM | 367 | HB2 ASN  | 24 | 3.662 | -9.422  | 5.628 | 1.00 | 0.00 |
| ATOM | 368 | HB3 ASN  | 24 | 4.258 | -10.199 | 4.142 | 1.00 | 0.00 |
| ATOM | 369 | CG ASN   | 24 | 5.794 | -9.612  | 5.518 | 1.00 | 0.00 |
| ATOM | 370 | OD1 ASN  | 24 | 6.762 | -8.965  | 5.168 | 1.00 | 0.00 |
| ATOM | 371 | ND2 ASN  | 24 | 5.912 | -10.502 | 6.465 | 1.00 | 0.00 |
| ATOM | 372 | HD21 ASN | 24 | 6.809 | -10.651 | 6.905 | 1.00 | 0.00 |
| ATOM | 373 | HD22 ASN | 24 | 5.106 | -11.038 | 6.753 | 1.00 | 0.00 |
| ATOM | 374 | C ASN    | 24 | 3.051 | -7.812  | 3.499 | 1.00 | 0.00 |
| ATOM | 375 | O ASN    | 24 | 2.089 | -8.486  | 3.807 | 1.00 | 0.00 |

|      |     |      |     |    |        |        |        |      |      |
|------|-----|------|-----|----|--------|--------|--------|------|------|
| ATOM | 376 | N    | LEU | 25 | 2.957  | -6.867 | 2.605  | 1.00 | 0.00 |
| ATOM | 377 | H    | LEU | 25 | 3.754  | -6.305 | 2.343  | 1.00 | 0.00 |
| ATOM | 378 | CA   | LEU | 25 | 1.651  | -6.596 | 1.940  | 1.00 | 0.00 |
| ATOM | 379 | HA   | LEU | 25 | 0.856  | -7.167 | 2.420  | 1.00 | 0.00 |
| ATOM | 380 | CB   | LEU | 25 | 1.321  | -5.106 | 2.055  | 1.00 | 0.00 |
| ATOM | 381 | HB2  | LEU | 25 | 2.213  | -4.519 | 1.837  | 1.00 | 0.00 |
| ATOM | 382 | HB3  | LEU | 25 | 0.536  | -4.852 | 1.343  | 1.00 | 0.00 |
| ATOM | 383 | CG   | LEU | 25 | 0.841  | -4.797 | 3.475  | 1.00 | 0.00 |
| ATOM | 384 | HG   | LEU | 25 | 1.481  | -5.309 | 4.194  | 1.00 | 0.00 |
| ATOM | 385 | CD1  | LEU | 25 | 0.904  | -3.289 | 3.719  | 1.00 | 0.00 |
| ATOM | 386 | HD11 | LEU | 25 | 0.264  | -2.778 | 3.000  | 1.00 | 0.00 |
| ATOM | 387 | HD12 | LEU | 25 | 0.562  | -3.070 | 4.730  | 1.00 | 0.00 |
| ATOM | 388 | HD13 | LEU | 25 | 1.931  | -2.944 | 3.600  | 1.00 | 0.00 |
| ATOM | 389 | CD2  | LEU | 25 | -0.602 | -5.281 | 3.642  | 1.00 | 0.00 |
| ATOM | 390 | HD21 | LEU | 25 | -0.647 | -6.357 | 3.469  | 1.00 | 0.00 |
| ATOM | 391 | HD22 | LEU | 25 | -0.944 | -5.062 | 4.653  | 1.00 | 0.00 |
| ATOM | 392 | HD23 | LEU | 25 | -1.242 | -4.771 | 2.923  | 1.00 | 0.00 |
| ATOM | 393 | C    | LEU | 25 | 1.743  | -6.985 | 0.463  | 1.00 | 0.00 |
| ATOM | 394 | O    | LEU | 25 | 1.715  | -6.144 | -0.414 | 1.00 | 0.00 |
| ATOM | 395 | N    | LYS | 26 | 1.852  | -8.255 | 0.181  | 1.00 | 0.00 |
| ATOM | 396 | H    | LYS | 26 | 1.880  | -8.956 | 0.908  | 1.00 | 0.00 |
| ATOM | 397 | CA   | LYS | 26 | 1.948  | -8.703 | -1.237 | 1.00 | 0.00 |

|      |     |     |     |    |        |         |        |      |      |
|------|-----|-----|-----|----|--------|---------|--------|------|------|
| ATOM | 398 | HA  | LYS | 26 | 2.737  | -8.158  | -1.755 | 1.00 | 0.00 |
| ATOM | 399 | CB  | LYS | 26 | 2.280  | -10.196 | -1.275 | 1.00 | 0.00 |
| ATOM | 400 | HB2 | LYS | 26 | 3.137  | -10.395 | -0.632 | 1.00 | 0.00 |
| ATOM | 401 | HB3 | LYS | 26 | 1.422  | -10.769 | -0.924 | 1.00 | 0.00 |
| ATOM | 402 | CG  | LYS | 26 | 2.614  | -10.607 | -2.711 | 1.00 | 0.00 |
| ATOM | 403 | HG2 | LYS | 26 | 2.047  | -11.500 | -2.975 | 1.00 | 0.00 |
| ATOM | 404 | HG3 | LYS | 26 | 2.353  | -9.797  | -3.391 | 1.00 | 0.00 |
| ATOM | 405 | CD  | LYS | 26 | 4.111  | -10.903 | -2.822 | 1.00 | 0.00 |
| ATOM | 406 | HD2 | LYS | 26 | 4.506  | -10.448 | -3.730 | 1.00 | 0.00 |
| ATOM | 407 | HD3 | LYS | 26 | 4.628  | -10.492 | -1.955 | 1.00 | 0.00 |
| ATOM | 408 | CE  | LYS | 26 | 4.330  | -12.417 | -2.875 | 1.00 | 0.00 |
| ATOM | 409 | HE2 | LYS | 26 | 4.645  | -12.774 | -1.894 | 1.00 | 0.00 |
| ATOM | 410 | HE3 | LYS | 26 | 3.400  | -12.910 | -3.159 | 1.00 | 0.00 |
| ATOM | 411 | NZ  | LYS | 26 | 5.385  | -12.732 | -3.879 | 1.00 | 0.00 |
| ATOM | 412 | HZ1 | LYS | 26 | 6.247  | -12.277 | -3.616 | 1.00 | 0.00 |
| ATOM | 413 | HZ2 | LYS | 26 | 5.529  | -13.731 | -3.914 | 1.00 | 0.00 |
| ATOM | 414 | HZ3 | LYS | 26 | 5.094  | -12.403 | -4.788 | 1.00 | 0.00 |
| ATOM | 415 | C   | LYS | 26 | 0.621  | -8.458  | -1.967 | 1.00 | 0.00 |
| ATOM | 416 | O   | LYS | 26 | 0.610  | -8.104  | -3.129 | 1.00 | 0.00 |
| ATOM | 417 | N   | PRO | 27 | -0.524 | -8.655  | -1.285 | 1.00 | 0.00 |
| ATOM | 418 | CD  | PRO | 27 | -0.633 | -9.080  | 0.125  | 1.00 | 0.00 |
| ATOM | 419 | HD2 | PRO | 27 | 0.056  | -8.498  | 0.737  | 1.00 | 0.00 |

|      |     |         |    |        |         |        |      |      |
|------|-----|---------|----|--------|---------|--------|------|------|
| ATOM | 420 | HD3 PRO | 27 | -0.385 | -10.139 | 0.208  | 1.00 | 0.00 |
| ATOM | 421 | CG PRO  | 27 | -2.072 | -8.801  | 0.452  | 1.00 | 0.00 |
| ATOM | 422 | HG2 PRO | 27 | -2.165 | -7.793  | 0.854  | 1.00 | 0.00 |
| ATOM | 423 | HG3 PRO | 27 | -2.423 | -9.521  | 1.192  | 1.00 | 0.00 |
| ATOM | 424 | CB PRO  | 27 | -2.819 | -8.947  | -0.828 | 1.00 | 0.00 |
| ATOM | 425 | HB2 PRO | 27 | -3.693 | -8.298  | -0.798 | 1.00 | 0.00 |
| ATOM | 426 | HB3 PRO | 27 | -3.132 | -9.968  | -1.050 | 1.00 | 0.00 |
| ATOM | 427 | CA PRO  | 27 | -1.845 | -8.457  | -1.898 | 1.00 | 0.00 |
| ATOM | 428 | HA PRO  | 27 | -1.889 | -9.045  | -2.815 | 1.00 | 0.00 |
| ATOM | 429 | C PRO   | 27 | -2.106 | -6.983  | -2.224 | 1.00 | 0.00 |
| ATOM | 430 | O PRO   | 27 | -2.653 | -6.656  | -3.259 | 1.00 | 0.00 |
| ATOM | 431 | N CYX   | 28 | -1.710 | -6.090  | -1.359 | 1.00 | 0.00 |
| ATOM | 432 | H CYX   | 28 | -1.248 | -6.348  | -0.498 | 1.00 | 0.00 |
| ATOM | 433 | CA CYX  | 28 | -1.931 | -4.643  | -1.637 | 1.00 | 0.00 |
| ATOM | 434 | HA CYX  | 28 | -2.985 | -4.454  | -1.837 | 1.00 | 0.00 |
| ATOM | 435 | CB CYX  | 28 | -1.508 | -3.817  | -0.420 | 1.00 | 0.00 |
| ATOM | 436 | HB2 CYX | 28 | -0.847 | -4.412  | 0.211  | 1.00 | 0.00 |
| ATOM | 437 | HB3 CYX | 28 | -0.983 | -2.922  | -0.753 | 1.00 | 0.00 |
| ATOM | 438 | SG CYX  | 28 | -2.968 | -3.413  | 0.571  | 1.00 | 0.00 |
| ATOM | 439 | C CYX   | 28 | -1.085 | -4.245  | -2.847 | 1.00 | 0.00 |
| ATOM | 440 | O CYX   | 28 | -1.589 | -3.760  | -3.845 | 1.00 | 0.00 |
| ATOM | 441 | N GLU   | 29 | 0.201  | -4.457  | -2.774 | 1.00 | 0.00 |

|      |     |     |     |    |        |        |        |      |      |
|------|-----|-----|-----|----|--------|--------|--------|------|------|
| ATOM | 442 | H   | GLU | 29 | 0.628  | -4.863 | -1.953 | 1.00 | 0.00 |
| ATOM | 443 | CA  | GLU | 29 | 1.076  | -4.106 | -3.922 | 1.00 | 0.00 |
| ATOM | 444 | HA  | GLU | 29 | 1.128  | -3.024 | -4.039 | 1.00 | 0.00 |
| ATOM | 445 | CB  | GLU | 29 | 2.487  | -4.639 | -3.674 | 1.00 | 0.00 |
| ATOM | 446 | HB2 | GLU | 29 | 2.726  | -4.557 | -2.614 | 1.00 | 0.00 |
| ATOM | 447 | HB3 | GLU | 29 | 2.540  | -5.685 | -3.978 | 1.00 | 0.00 |
| ATOM | 448 | CG  | GLU | 29 | 3.491  | -3.822 | -4.487 | 1.00 | 0.00 |
| ATOM | 449 | HG2 | GLU | 29 | 3.217  | -3.854 | -5.542 | 1.00 | 0.00 |
| ATOM | 450 | HG3 | GLU | 29 | 3.482  | -2.789 | -4.141 | 1.00 | 0.00 |
| ATOM | 451 | CD  | GLU | 29 | 4.893  | -4.407 | -4.307 | 1.00 | 0.00 |
| ATOM | 452 | OE1 | GLU | 29 | 5.024  | -5.357 | -3.551 | 1.00 | 0.00 |
| ATOM | 453 | OE2 | GLU | 29 | 5.811  | -3.898 | -4.927 | 1.00 | 0.00 |
| ATOM | 454 | C   | GLU | 29 | 0.507  | -4.744 | -5.189 | 1.00 | 0.00 |
| ATOM | 455 | O   | GLU | 29 | 0.599  | -4.198 | -6.271 | 1.00 | 0.00 |
| ATOM | 456 | N   | GLN | 30 | -0.077 | -5.904 | -5.064 | 1.00 | 0.00 |
| ATOM | 457 | H   | GLN | 30 | -0.151 | -6.367 | -4.169 | 1.00 | 0.00 |
| ATOM | 458 | CA  | GLN | 30 | -0.649 | -6.582 | -6.258 | 1.00 | 0.00 |
| ATOM | 459 | HA  | GLN | 30 | 0.084  | -6.609 | -7.065 | 1.00 | 0.00 |
| ATOM | 460 | CB  | GLN | 30 | -1.029 | -8.019 | -5.896 | 1.00 | 0.00 |
| ATOM | 461 | HB2 | GLN | 30 | -1.448 | -8.043 | -4.890 | 1.00 | 0.00 |
| ATOM | 462 | HB3 | GLN | 30 | -1.768 | -8.390 | -6.606 | 1.00 | 0.00 |
| ATOM | 463 | CG  | GLN | 30 | 0.219  | -8.905 | -5.949 | 1.00 | 0.00 |

|      |     |      |     |    |        |         |        |      |      |
|------|-----|------|-----|----|--------|---------|--------|------|------|
| ATOM | 464 | HG2  | GLN | 30 | 0.539  | -9.045  | -6.982 | 1.00 | 0.00 |
| ATOM | 465 | HG3  | GLN | 30 | 1.030  | -8.454  | -5.377 | 1.00 | 0.00 |
| ATOM | 466 | CD   | GLN | 30 | -0.101 | -10.273 | -5.347 | 1.00 | 0.00 |
| ATOM | 467 | OE1  | GLN | 30 | -1.198 | -10.503 | -4.877 | 1.00 | 0.00 |
| ATOM | 468 | NE2  | GLN | 30 | 0.818  | -11.200 | -5.339 | 1.00 | 0.00 |
| ATOM | 469 | HE21 | GLN | 30 | 0.614  | -12.107 | -4.943 | 1.00 | 0.00 |
| ATOM | 470 | HE22 | GLN | 30 | 1.730  | -11.007 | -5.729 | 1.00 | 0.00 |
| ATOM | 471 | C    | GLN | 30 | -1.893 | -5.827  | -6.733 | 1.00 | 0.00 |
| ATOM | 472 | O    | GLN | 30 | -2.269 | -5.904  | -7.886 | 1.00 | 0.00 |
| ATOM | 473 | N    | HID | 31 | -2.535 | -5.093  | -5.864 | 1.00 | 0.00 |
| ATOM | 474 | H    | HID | 31 | -2.234 | -5.019  | -4.903 | 1.00 | 0.00 |
| ATOM | 475 | CA   | HID | 31 | -3.745 | -4.337  | -6.285 | 1.00 | 0.00 |
| ATOM | 476 | HA   | HID | 31 | -4.358 | -4.945  | -6.950 | 1.00 | 0.00 |
| ATOM | 477 | CB   | HID | 31 | -4.575 | -3.974  | -5.049 | 1.00 | 0.00 |
| ATOM | 478 | HB2  | HID | 31 | -5.248 | -4.782  | -4.762 | 1.00 | 0.00 |
| ATOM | 479 | HB3  | HID | 31 | -3.950 | -3.704  | -4.198 | 1.00 | 0.00 |
| ATOM | 480 | CG   | HID | 31 | -5.439 | -2.777  | -5.346 | 1.00 | 0.00 |
| ATOM | 481 | ND1  | HID | 31 | -6.510 | -2.837  | -6.224 | 1.00 | 0.00 |
| ATOM | 482 | HD1  | HID | 31 | -6.817 | -3.649  | -6.741 | 1.00 | 0.00 |
| ATOM | 483 | CE1  | HID | 31 | -7.070 | -1.614  | -6.265 | 1.00 | 0.00 |
| ATOM | 484 | HE1  | HID | 31 | -7.935 | -1.484  | -6.916 | 1.00 | 0.00 |
| ATOM | 485 | NE2  | HID | 31 | -6.435 | -0.751  | -5.467 | 1.00 | 0.00 |

|      |     |      |     |    |        |        |        |      |      |
|------|-----|------|-----|----|--------|--------|--------|------|------|
| ATOM | 486 | CD2  | HID | 31 | -5.404 | -1.483 | -4.885 | 1.00 | 0.00 |
| ATOM | 487 | HD2  | HID | 31 | -4.725 | -1.003 | -4.180 | 1.00 | 0.00 |
| ATOM | 488 | C    | HID | 31 | -3.292 | -3.069 | -7.000 | 1.00 | 0.00 |
| ATOM | 489 | O    | HID | 31 | -4.025 | -2.471 | -7.763 | 1.00 | 0.00 |
| ATOM | 490 | N    | ILE | 32 | -2.078 | -2.661 | -6.759 | 1.00 | 0.00 |
| ATOM | 491 | H    | ILE | 32 | -1.468 | -3.155 | -6.123 | 1.00 | 0.00 |
| ATOM | 492 | CA   | ILE | 32 | -1.559 | -1.435 | -7.425 | 1.00 | 0.00 |
| ATOM | 493 | HA   | ILE | 32 | -2.395 | -0.780 | -7.669 | 1.00 | 0.00 |
| ATOM | 494 | CB   | ILE | 32 | -0.589 | -0.701 | -6.493 | 1.00 | 0.00 |
| ATOM | 495 | HB   | ILE | 32 | 0.374  | -0.579 | -6.989 | 1.00 | 0.00 |
| ATOM | 496 | CG2  | ILE | 32 | -1.162 | 0.671  | -6.151 | 1.00 | 0.00 |
| ATOM | 497 | HG21 | ILE | 32 | -2.124 | 0.549  | -5.654 | 1.00 | 0.00 |
| ATOM | 498 | HG22 | ILE | 32 | -0.475 | 1.197  | -5.488 | 1.00 | 0.00 |
| ATOM | 499 | HG23 | ILE | 32 | -1.296 | 1.247  | -7.066 | 1.00 | 0.00 |
| ATOM | 500 | CG1  | ILE | 32 | -0.394 | -1.504 | -5.203 | 1.00 | 0.00 |
| ATOM | 501 | HG12 | ILE | 32 | -1.367 | -1.747 | -4.777 | 1.00 | 0.00 |
| ATOM | 502 | HG13 | ILE | 32 | 0.144  | -2.426 | -5.428 | 1.00 | 0.00 |
| ATOM | 503 | CD1  | ILE | 32 | 0.410  | -0.677 | -4.198 | 1.00 | 0.00 |
| ATOM | 504 | HD11 | ILE | 32 | -0.127 | 0.244  | -3.972 | 1.00 | 0.00 |
| ATOM | 505 | HD12 | ILE | 32 | 0.547  | -1.251 | -3.282 | 1.00 | 0.00 |
| ATOM | 506 | HD13 | ILE | 32 | 1.384  | -0.435 | -4.623 | 1.00 | 0.00 |
| ATOM | 507 | C    | ILE | 32 | -0.831 | -1.829 | -8.709 | 1.00 | 0.00 |



|      |     |     |     |    |        |        |         |      |      |
|------|-----|-----|-----|----|--------|--------|---------|------|------|
| ATOM | 508 | O   | ILE | 32 | -1.104 | -1.308 | -9.772  | 1.00 | 0.00 |
| ATOM | 509 | N   | MET | 33 | 0.088  | -2.750 | -8.623  | 1.00 | 0.00 |
| ATOM | 510 | H   | MET | 33 | 0.321  | -3.190 | -7.744  | 1.00 | 0.00 |
| ATOM | 511 | CA  | MET | 33 | 0.825  | -3.179 | -9.844  | 1.00 | 0.00 |
| ATOM | 512 | HA  | MET | 33 | 1.337  | -2.329 | -10.295 | 1.00 | 0.00 |
| ATOM | 513 | CB  | MET | 33 | 1.868  | -4.233 | -9.466  | 1.00 | 0.00 |
| ATOM | 514 | HB2 | MET | 33 | 1.364  | -5.132 | -9.110  | 1.00 | 0.00 |
| ATOM | 515 | HB3 | MET | 33 | 2.471  | -4.478 | -10.340 | 1.00 | 0.00 |
| ATOM | 516 | CG  | MET | 33 | 2.772  | -3.684 | -8.361  | 1.00 | 0.00 |
| ATOM | 517 | HG2 | MET | 33 | 3.172  | -2.715 | -8.659  | 1.00 | 0.00 |
| ATOM | 518 | HG3 | MET | 33 | 2.201  | -3.573 | -7.439  | 1.00 | 0.00 |
| ATOM | 519 | SD  | MET | 33 | 4.143  | -4.831 | -8.077  | 1.00 | 0.00 |
| ATOM | 520 | CE  | MET | 33 | 5.274  | -4.139 | -9.308  | 1.00 | 0.00 |
| ATOM | 521 | HE1 | MET | 33 | 5.483  | -3.097 | -9.066  | 1.00 | 0.00 |
| ATOM | 522 | HE2 | MET | 33 | 6.206  | -4.706 | -9.305  | 1.00 | 0.00 |
| ATOM | 523 | HE3 | MET | 33 | 4.817  | -4.198 | -10.296 | 1.00 | 0.00 |
| ATOM | 524 | C   | MET | 33 | -0.165 | -3.774 | -10.845 | 1.00 | 0.00 |
| ATOM | 525 | O   | MET | 33 | -0.071 | -3.550 | -12.034 | 1.00 | 0.00 |
| ATOM | 526 | N   | GLN | 34 | -1.115 | -4.530 | -10.370 | 1.00 | 0.00 |
| ATOM | 527 | H   | GLN | 34 | -1.198 | -4.718 | -9.381  | 1.00 | 0.00 |
| ATOM | 528 | CA  | GLN | 34 | -2.113 | -5.143 | -11.292 | 1.00 | 0.00 |
| ATOM | 529 | HA  | GLN | 34 | -1.609 | -5.741 | -12.052 | 1.00 | 0.00 |

|      |     |      |     |    |        |        |         |      |      |
|------|-----|------|-----|----|--------|--------|---------|------|------|
| ATOM | 530 | CB   | GLN | 34 | -3.050 | -6.053 | -10.495 | 1.00 | 0.00 |
| ATOM | 531 | HB2  | GLN | 34 | -3.402 | -5.526 | -9.609  | 1.00 | 0.00 |
| ATOM | 532 | HB3  | GLN | 34 | -3.902 | -6.330 | -11.115 | 1.00 | 0.00 |
| ATOM | 533 | CG   | GLN | 34 | -2.297 | -7.315 | -10.071 | 1.00 | 0.00 |
| ATOM | 534 | HG2  | GLN | 34 | -2.016 | -7.901 | -10.946 | 1.00 | 0.00 |
| ATOM | 535 | HG3  | GLN | 34 | -1.401 | -7.050 | -9.509  | 1.00 | 0.00 |
| ATOM | 536 | CD   | GLN | 34 | -3.198 | -8.171 | -9.179  | 1.00 | 0.00 |
| ATOM | 537 | OE1  | GLN | 34 | -4.253 | -7.735 | -8.764  | 1.00 | 0.00 |
| ATOM | 538 | NE2  | GLN | 34 | -2.824 | -9.381 | -8.865  | 1.00 | 0.00 |
| ATOM | 539 | HE21 | GLN | 34 | -3.414 | -9.952 | -8.277  | 1.00 | 0.00 |
| ATOM | 540 | HE22 | GLN | 34 | -1.946 | -9.742 | -9.212  | 1.00 | 0.00 |
| ATOM | 541 | C    | GLN | 34 | -2.930 | -4.044 | -11.974 | 1.00 | 0.00 |
| ATOM | 542 | O    | GLN | 34 | -3.165 | -4.085 | -13.165 | 1.00 | 0.00 |
| ATOM | 543 | N    | ARG | 35 | -3.373 | -3.066 | -11.232 | 1.00 | 0.00 |
| ATOM | 544 | H    | ARG | 35 | -3.185 | -3.024 | -10.241 | 1.00 | 0.00 |
| ATOM | 545 | CA   | ARG | 35 | -4.182 | -1.974 | -11.846 | 1.00 | 0.00 |
| ATOM | 546 | HA   | ARG | 35 | -5.044 | -2.389 | -12.367 | 1.00 | 0.00 |
| ATOM | 547 | CB   | ARG | 35 | -4.680 | -1.033 | -10.749 | 1.00 | 0.00 |
| ATOM | 548 | HB2  | ARG | 35 | -3.899 | -0.901 | -10.000 | 1.00 | 0.00 |
| ATOM | 549 | HB3  | ARG | 35 | -4.931 | -0.067 | -11.185 | 1.00 | 0.00 |
| ATOM | 550 | CG   | ARG | 35 | -5.924 | -1.634 | -10.088 | 1.00 | 0.00 |
| ATOM | 551 | HG2  | ARG | 35 | -6.628 | -1.952 | -10.858 | 1.00 | 0.00 |

|      |     |      |     |    |        |        |         |      |      |
|------|-----|------|-----|----|--------|--------|---------|------|------|
| ATOM | 552 | HG3  | ARG | 35 | -5.635 | -2.494 | -9.484  | 1.00 | 0.00 |
| ATOM | 553 | CD   | ARG | 35 | -6.585 | -0.582 | -9.195  | 1.00 | 0.00 |
| ATOM | 554 | HD2  | ARG | 35 | -6.995 | 0.224  | -9.802  | 1.00 | 0.00 |
| ATOM | 555 | HD3  | ARG | 35 | -7.382 | -1.035 | -8.606  | 1.00 | 0.00 |
| ATOM | 556 | NE   | ARG | 35 | -5.570 | -0.011 | -8.266  | 1.00 | 0.00 |
| ATOM | 557 | HE   | ARG | 35 | -4.722 | -0.511 | -8.039  | 1.00 | 0.00 |
| ATOM | 558 | CZ   | ARG | 35 | -5.767 | 1.159  | -7.723  | 1.00 | 0.00 |
| ATOM | 559 | NH1  | ARG | 35 | -6.282 | 2.128  | -8.430  | 1.00 | 0.00 |
| ATOM | 560 | HH11 | ARG | 35 | -6.527 | 1.968  | -9.397  | 1.00 | 0.00 |
| ATOM | 561 | HH12 | ARG | 35 | -6.433 | 3.032  | -8.007  | 1.00 | 0.00 |
| ATOM | 562 | NH2  | ARG | 35 | -5.447 | 1.361  | -6.475  | 1.00 | 0.00 |
| ATOM | 563 | HH21 | ARG | 35 | -5.047 | 0.609  | -5.932  | 1.00 | 0.00 |
| ATOM | 564 | HH22 | ARG | 35 | -5.601 | 2.267  | -6.058  | 1.00 | 0.00 |
| ATOM | 565 | C    | ARG | 35 | -3.324 | -1.187 | -12.840 | 1.00 | 0.00 |
| ATOM | 566 | O    | ARG | 35 | -3.682 | -1.025 | -13.989 | 1.00 | 0.00 |
| ATOM | 567 | N    | ILE | 36 | -2.199 | -0.692 | -12.406 | 1.00 | 0.00 |
| ATOM | 568 | H    | ILE | 36 | -1.896 | -0.820 | -11.451 | 1.00 | 0.00 |
| ATOM | 569 | CA   | ILE | 36 | -1.325 | 0.090  | -13.326 | 1.00 | 0.00 |
| ATOM | 570 | HA   | ILE | 36 | -1.899 | 0.896  | -13.782 | 1.00 | 0.00 |
| ATOM | 571 | CB   | ILE | 36 | -0.157 | 0.681  | -12.534 | 1.00 | 0.00 |
| ATOM | 572 | HB   | ILE | 36 | 0.477  | 1.265  | -13.201 | 1.00 | 0.00 |
| ATOM | 573 | CG2  | ILE | 36 | -0.701 | 1.585  | -11.425 | 1.00 | 0.00 |

|      |     |      |     |    |        |        |         |      |      |
|------|-----|------|-----|----|--------|--------|---------|------|------|
| ATOM | 574 | HG21 | ILE | 36 | -1.334 | 1.001  | -10.758 | 1.00 | 0.00 |
| ATOM | 575 | HG22 | ILE | 36 | 0.130  | 2.007  | -10.859 | 1.00 | 0.00 |
| ATOM | 576 | HG23 | ILE | 36 | -1.286 | 2.391  | -11.867 | 1.00 | 0.00 |
| ATOM | 577 | CG1  | ILE | 36 | 0.666  | -0.453 | -11.917 | 1.00 | 0.00 |
| ATOM | 578 | HG12 | ILE | 36 | -0.006 | -1.211 | -11.515 | 1.00 | 0.00 |
| ATOM | 579 | HG13 | ILE | 36 | 1.300  | -0.900 | -12.684 | 1.00 | 0.00 |
| ATOM | 580 | CD1  | ILE | 36 | 1.542  | 0.101  | -10.791 | 1.00 | 0.00 |
| ATOM | 581 | HD11 | ILE | 36 | 0.910  | 0.547  | -10.024 | 1.00 | 0.00 |
| ATOM | 582 | HD12 | ILE | 36 | 2.127  | -0.708 | -10.353 | 1.00 | 0.00 |
| ATOM | 583 | HD13 | ILE | 36 | 2.215  | 0.858  | -11.193 | 1.00 | 0.00 |
| ATOM | 584 | C    | ILE | 36 | -0.784 | -0.820 | -14.431 | 1.00 | 0.00 |
| ATOM | 585 | O    | ILE | 36 | -0.269 | -0.358 | -15.429 | 1.00 | 0.00 |
| ATOM | 586 | N    | MET | 37 | -0.896 | -2.110 | -14.265 | 1.00 | 0.00 |
| ATOM | 587 | H    | MET | 37 | -1.320 | -2.508 | -13.439 | 1.00 | 0.00 |
| ATOM | 588 | CA   | MET | 37 | -0.384 | -3.039 | -15.314 | 1.00 | 0.00 |
| ATOM | 589 | HA   | MET | 37 | 0.267  | -2.505 | -16.006 | 1.00 | 0.00 |
| ATOM | 590 | CB   | MET | 37 | 0.419  | -4.163 | -14.657 | 1.00 | 0.00 |
| ATOM | 591 | HB2  | MET | 37 | -0.148 | -4.577 | -13.823 | 1.00 | 0.00 |
| ATOM | 592 | HB3  | MET | 37 | 0.614  | -4.948 | -15.389 | 1.00 | 0.00 |
| ATOM | 593 | CG   | MET | 37 | 1.748  | -3.605 | -14.142 | 1.00 | 0.00 |
| ATOM | 594 | HG2  | MET | 37 | 2.164  | -2.911 | -14.872 | 1.00 | 0.00 |
| ATOM | 595 | HG3  | MET | 37 | 1.589  | -3.086 | -13.197 | 1.00 | 0.00 |

|      |     |     |     |    |        |        |         |      |      |
|------|-----|-----|-----|----|--------|--------|---------|------|------|
| ATOM | 596 | SD  | MET | 37 | 2.913  | -4.965 | -13.883 | 1.00 | 0.00 |
| ATOM | 597 | CE  | MET | 37 | 1.918  | -5.894 | -12.691 | 1.00 | 0.00 |
| ATOM | 598 | HE1 | MET | 37 | 0.971  | -6.177 | -13.150 | 1.00 | 0.00 |
| ATOM | 599 | HE2 | MET | 37 | 2.457  | -6.793 | -12.389 | 1.00 | 0.00 |
| ATOM | 600 | HE3 | MET | 37 | 1.727  | -5.274 | -11.815 | 1.00 | 0.00 |
| ATOM | 601 | C   | MET | 37 | -1.562 | -3.635 | -16.086 | 1.00 | 0.00 |
| ATOM | 602 | O   | MET | 37 | -1.411 | -4.115 | -17.193 | 1.00 | 0.00 |
| ATOM | 603 | N   | GLY | 38 | -2.735 | -3.610 | -15.515 | 1.00 | 0.00 |
| ATOM | 604 | H   | GLY | 38 | -2.869 | -3.214 | -14.596 | 1.00 | 0.00 |
| ATOM | 605 | CA  | GLY | 38 | -3.919 | -4.176 | -16.220 | 1.00 | 0.00 |
| ATOM | 606 | HA2 | GLY | 38 | -3.710 | -5.197 | -16.542 | 1.00 | 0.00 |
| ATOM | 607 | HA3 | GLY | 38 | -4.784 | -4.175 | -15.558 | 1.00 | 0.00 |
| ATOM | 608 | C   | GLY | 38 | -4.231 | -3.320 | -17.450 | 1.00 | 0.00 |
| ATOM | 609 | O   | GLY | 38 | -4.810 | -3.786 | -18.412 | 1.00 | 0.00 |
| ATOM | 610 | N   | GLU | 39 | -3.852 | -2.072 | -17.425 | 1.00 | 0.00 |
| ATOM | 611 | H   | GLU | 39 | -3.372 | -1.679 | -16.628 | 1.00 | 0.00 |
| ATOM | 612 | CA  | GLU | 39 | -4.126 | -1.187 | -18.592 | 1.00 | 0.00 |
| ATOM | 613 | HA  | GLU | 39 | -5.194 | -1.169 | -18.810 | 1.00 | 0.00 |
| ATOM | 614 | CB  | GLU | 39 | -3.667 | 0.237  | -18.272 | 1.00 | 0.00 |
| ATOM | 615 | HB2 | GLU | 39 | -4.128 | 0.567  | -17.341 | 1.00 | 0.00 |
| ATOM | 616 | HB3 | GLU | 39 | -2.582 | 0.254  | -18.166 | 1.00 | 0.00 |
| ATOM | 617 | CG  | GLU | 39 | -4.083 | 1.174  | -19.407 | 1.00 | 0.00 |

|      |     |      |     |    |        |        |         |      |      |
|------|-----|------|-----|----|--------|--------|---------|------|------|
| ATOM | 618 | HG2  | GLU | 39 | -3.706 | 0.787  | -20.354 | 1.00 | 0.00 |
| ATOM | 619 | HG3  | GLU | 39 | -5.170 | 1.236  | -19.447 | 1.00 | 0.00 |
| ATOM | 620 | CD   | GLU | 39 | -3.502 | 2.567  | -19.158 | 1.00 | 0.00 |
| ATOM | 621 | OE1  | GLU | 39 | -2.791 | 2.724  | -18.178 | 1.00 | 0.00 |
| ATOM | 622 | OE2  | GLU | 39 | -3.777 | 3.453  | -19.950 | 1.00 | 0.00 |
| ATOM | 623 | C    | GLU | 39 | -3.368 | -1.706 | -19.815 | 1.00 | 0.00 |
| ATOM | 624 | O    | GLU | 39 | -3.752 | -1.467 | -20.943 | 1.00 | 0.00 |
| ATOM | 625 | N    | GLN | 40 | -2.292 | -2.413 | -19.602 | 1.00 | 0.00 |
| ATOM | 626 | H    | GLN | 40 | -1.964 | -2.615 | -18.668 | 1.00 | 0.00 |
| ATOM | 627 | CA   | GLN | 40 | -1.512 | -2.946 | -20.754 | 1.00 | 0.00 |
| ATOM | 628 | HA   | GLN | 40 | -1.238 | -2.138 | -21.432 | 1.00 | 0.00 |
| ATOM | 629 | CB   | GLN | 40 | -0.232 | -3.609 | -20.241 | 1.00 | 0.00 |
| ATOM | 630 | HB2  | GLN | 40 | -0.481 | -4.319 | -19.452 | 1.00 | 0.00 |
| ATOM | 631 | HB3  | GLN | 40 | 0.259  | -4.136 | -21.060 | 1.00 | 0.00 |
| ATOM | 632 | CG   | GLN | 40 | 0.710  | -2.539 | -19.686 | 1.00 | 0.00 |
| ATOM | 633 | HG2  | GLN | 40 | 0.967  | -1.820 | -20.464 | 1.00 | 0.00 |
| ATOM | 634 | HG3  | GLN | 40 | 0.240  | -2.019 | -18.852 | 1.00 | 0.00 |
| ATOM | 635 | CD   | GLN | 40 | 1.996  | -3.200 | -19.187 | 1.00 | 0.00 |
| ATOM | 636 | OE1  | GLN | 40 | 2.058  | -4.406 | -19.048 | 1.00 | 0.00 |
| ATOM | 637 | NE2  | GLN | 40 | 3.034  | -2.458 | -18.911 | 1.00 | 0.00 |
| ATOM | 638 | HE21 | GLN | 40 | 3.886  | -2.890 | -18.581 | 1.00 | 0.00 |
| ATOM | 639 | HE22 | GLN | 40 | 2.981  | -1.457 | -19.029 | 1.00 | 0.00 |

|      |     |     |     |    |        |        |         |      |      |
|------|-----|-----|-----|----|--------|--------|---------|------|------|
| ATOM | 640 | C   | GLN | 40 | -2.356 | -3.977 | -21.505 | 1.00 | 0.00 |
| ATOM | 641 | O   | GLN | 40 | -2.253 | -4.122 | -22.706 | 1.00 | 0.00 |
| ATOM | 642 | N   | GLU | 41 | -3.191 | -4.695 | -20.804 | 1.00 | 0.00 |
| ATOM | 643 | H   | GLU | 41 | -3.280 | -4.583 | -19.804 | 1.00 | 0.00 |
| ATOM | 644 | CA  | GLU | 41 | -4.043 | -5.715 | -21.479 | 1.00 | 0.00 |
| ATOM | 645 | HA  | GLU | 41 | -3.421 | -6.486 | -21.935 | 1.00 | 0.00 |
| ATOM | 646 | CB  | GLU | 41 | -4.962 | -6.374 | -20.448 | 1.00 | 0.00 |
| ATOM | 647 | HB2 | GLU | 41 | -5.573 | -5.612 | -19.966 | 1.00 | 0.00 |
| ATOM | 648 | HB3 | GLU | 41 | -5.609 | -7.096 | -20.947 | 1.00 | 0.00 |
| ATOM | 649 | CG  | GLU | 41 | -4.116 | -7.091 | -19.394 | 1.00 | 0.00 |
| ATOM | 650 | HG2 | GLU | 41 | -3.482 | -7.834 | -19.879 | 1.00 | 0.00 |
| ATOM | 651 | HG3 | GLU | 41 | -3.491 | -6.365 | -18.874 | 1.00 | 0.00 |
| ATOM | 652 | CD  | GLU | 41 | -5.036 | -7.785 | -18.388 | 1.00 | 0.00 |
| ATOM | 653 | OE1 | GLU | 41 | -6.231 | -7.552 | -18.450 | 1.00 | 0.00 |
| ATOM | 654 | OE2 | GLU | 41 | -4.529 | -8.538 | -17.574 | 1.00 | 0.00 |
| ATOM | 655 | C   | GLU | 41 | -4.888 | -5.038 | -22.560 | 1.00 | 0.00 |
| ATOM | 656 | O   | GLU | 41 | -5.391 | -3.949 | -22.374 | 1.00 | 0.00 |
| ATOM | 657 | N   | GLN | 42 | -5.048 | -5.676 | -23.687 | 1.00 | 0.00 |
| ATOM | 658 | H   | GLN | 42 | -4.631 | -6.582 | -23.850 | 1.00 | 0.00 |
| ATOM | 659 | CA  | GLN | 42 | -5.861 | -5.067 | -24.776 | 1.00 | 0.00 |
| ATOM | 660 | HA  | GLN | 42 | -5.461 | -4.090 | -25.046 | 1.00 | 0.00 |
| ATOM | 661 | CB  | GLN | 42 | -5.818 | -5.971 | -26.010 | 1.00 | 0.00 |

|      |     |      |     |    |         |        |         |      |      |
|------|-----|------|-----|----|---------|--------|---------|------|------|
| ATOM | 662 | HB2  | GLN | 42 | -6.163  | -6.970 | -25.742 | 1.00 | 0.00 |
| ATOM | 663 | HB3  | GLN | 42 | -6.464  | -5.560 | -26.785 | 1.00 | 0.00 |
| ATOM | 664 | CG   | GLN | 42 | -4.383  | -6.051 | -26.533 | 1.00 | 0.00 |
| ATOM | 665 | HG2  | GLN | 42 | -3.729  | -6.493 | -25.781 | 1.00 | 0.00 |
| ATOM | 666 | HG3  | GLN | 42 | -4.345  | -6.650 | -27.443 | 1.00 | 0.00 |
| ATOM | 667 | CD   | GLN | 42 | -3.878  | -4.642 | -26.853 | 1.00 | 0.00 |
| ATOM | 668 | OE1  | GLN | 42 | -4.529  | -3.895 | -27.555 | 1.00 | 0.00 |
| ATOM | 669 | NE2  | GLN | 42 | -2.736  | -4.245 | -26.363 | 1.00 | 0.00 |
| ATOM | 670 | HE21 | GLN | 42 | -2.396  | -3.317 | -26.570 | 1.00 | 0.00 |
| ATOM | 671 | HE22 | GLN | 42 | -2.196  | -4.868 | -25.779 | 1.00 | 0.00 |
| ATOM | 672 | C    | GLN | 42 | -7.308  | -4.910 | -24.306 | 1.00 | 0.00 |
| ATOM | 673 | O    | GLN | 42 | -7.979  | -3.954 | -24.638 | 1.00 | 0.00 |
| ATOM | 674 | N    | TYR | 43 | -7.795  | -5.843 | -23.533 | 1.00 | 0.00 |
| ATOM | 675 | H    | TYR | 43 | -7.243  | -6.641 | -23.251 | 1.00 | 0.00 |
| ATOM | 676 | CA   | TYR | 43 | -9.199  | -5.746 | -23.042 | 1.00 | 0.00 |
| ATOM | 677 | HA   | TYR | 43 | -9.683  | -4.861 | -23.455 | 1.00 | 0.00 |
| ATOM | 678 | CB   | TYR | 43 | -9.983  | -6.984 | -23.485 | 1.00 | 0.00 |
| ATOM | 679 | HB2  | TYR | 43 | -9.521  | -7.876 | -23.061 | 1.00 | 0.00 |
| ATOM | 680 | HB3  | TYR | 43 | -11.013 | -6.909 | -23.137 | 1.00 | 0.00 |
| ATOM | 681 | CG   | TYR | 43 | -9.967  | -7.077 | -24.992 | 1.00 | 0.00 |
| ATOM | 682 | CD1  | TYR | 43 | -10.842 | -6.290 | -25.751 | 1.00 | 0.00 |
| ATOM | 683 | HD1  | TYR | 43 | -11.533 | -5.610 | -25.255 | 1.00 | 0.00 |



|      |     |     |     |    |         |        |         |      |      |
|------|-----|-----|-----|----|---------|--------|---------|------|------|
| ATOM | 684 | CE1 | TYR | 43 | -10.828 | -6.378 | -27.148 | 1.00 | 0.00 |
| ATOM | 685 | HE1 | TYR | 43 | -11.509 | -5.766 | -27.739 | 1.00 | 0.00 |
| ATOM | 686 | CZ  | TYR | 43 | -9.941  | -7.253 | -27.786 | 1.00 | 0.00 |
| ATOM | 687 | OH  | TYR | 43 | -9.928  | -7.339 | -29.164 | 1.00 | 0.00 |
| ATOM | 688 | HH  | TYR | 43 | -10.566 | -6.757 | -29.582 | 1.00 | 0.00 |
| ATOM | 689 | CE2 | TYR | 43 | -9.066  | -8.039 | -27.027 | 1.00 | 0.00 |
| ATOM | 690 | HE2 | TYR | 43 | -8.374  | -8.720 | -27.523 | 1.00 | 0.00 |
| ATOM | 691 | CD2 | TYR | 43 | -9.080  | -7.951 | -25.631 | 1.00 | 0.00 |
| ATOM | 692 | HD2 | TYR | 43 | -8.399  | -8.564 | -25.040 | 1.00 | 0.00 |
| ATOM | 693 | C   | TYR | 43 | -9.199  | -5.665 | -21.514 | 1.00 | 0.00 |
| ATOM | 694 | O   | TYR | 43 | -8.252  | -6.057 | -20.862 | 1.00 | 0.00 |
| ATOM | 695 | N   | ASP | 44 | -10.255 | -5.159 | -20.938 | 1.00 | 0.00 |
| ATOM | 696 | H   | ASP | 44 | -11.046 | -4.832 | -21.473 | 1.00 | 0.00 |
| ATOM | 697 | CA  | ASP | 44 | -10.314 | -5.053 | -19.453 | 1.00 | 0.00 |
| ATOM | 698 | HA  | ASP | 44 | -10.320 | -6.046 | -19.004 | 1.00 | 0.00 |
| ATOM | 699 | CB  | ASP | 44 | -9.086  | -4.294 | -18.944 | 1.00 | 0.00 |
| ATOM | 700 | HB2 | ASP | 44 | -9.211  | -4.070 | -17.885 | 1.00 | 0.00 |
| ATOM | 701 | HB3 | ASP | 44 | -8.195  | -4.907 | -19.082 | 1.00 | 0.00 |
| ATOM | 702 | CG  | ASP | 44 | -8.933  | -2.988 | -19.727 | 1.00 | 0.00 |
| ATOM | 703 | OD1 | ASP | 44 | -9.649  | -2.815 | -20.699 | 1.00 | 0.00 |
| ATOM | 704 | OD2 | ASP | 44 | -8.100  | -2.185 | -19.340 | 1.00 | 0.00 |
| ATOM | 705 | C   | ASP | 44 | -11.583 | -4.301 | -19.046 | 1.00 | 0.00 |

|      |     |     |     |    |         |        |         |      |      |
|------|-----|-----|-----|----|---------|--------|---------|------|------|
| ATOM | 706 | O   | ASP | 44 | -12.290 | -4.698 | -18.142 | 1.00 | 0.00 |
| ATOM | 707 | N   | SER | 45 | -11.878 | -3.215 | -19.708 | 1.00 | 0.00 |
| ATOM | 708 | H   | SER | 45 | -11.295 | -2.877 | -20.460 | 1.00 | 0.00 |
| ATOM | 709 | CA  | SER | 45 | -13.102 | -2.440 | -19.360 | 1.00 | 0.00 |
| ATOM | 710 | HA  | SER | 45 | -12.980 | -1.954 | -18.392 | 1.00 | 0.00 |
| ATOM | 711 | CB  | SER | 45 | -13.341 | -1.364 | -20.421 | 1.00 | 0.00 |
| ATOM | 712 | HB2 | SER | 45 | -14.147 | -0.706 | -20.097 | 1.00 | 0.00 |
| ATOM | 713 | HB3 | SER | 45 | -12.430 | -0.782 | -20.559 | 1.00 | 0.00 |
| ATOM | 714 | OG  | SER | 45 | -13.699 | -1.981 | -21.649 | 1.00 | 0.00 |
| ATOM | 715 | HG  | SER | 45 | -13.849 | -1.306 | -22.315 | 1.00 | 0.00 |
| ATOM | 716 | C   | SER | 45 | -14.305 | -3.382 | -19.308 | 1.00 | 0.00 |
| ATOM | 717 | O   | SER | 45 | -15.203 | -3.215 | -18.507 | 1.00 | 0.00 |
| ATOM | 718 | N   | TYR | 46 | -14.332 | -4.372 | -20.159 | 1.00 | 0.00 |
| ATOM | 719 | H   | TYR | 46 | -13.588 | -4.518 | -20.827 | 1.00 | 0.00 |
| ATOM | 720 | CA  | TYR | 46 | -15.478 | -5.323 | -20.160 | 1.00 | 0.00 |
| ATOM | 721 | HA  | TYR | 46 | -16.411 | -4.791 | -20.346 | 1.00 | 0.00 |
| ATOM | 722 | CB  | TYR | 46 | -15.278 | -6.361 | -21.266 | 1.00 | 0.00 |
| ATOM | 723 | HB2 | TYR | 46 | -14.312 | -6.851 | -21.138 | 1.00 | 0.00 |
| ATOM | 724 | HB3 | TYR | 46 | -16.072 | -7.106 | -21.213 | 1.00 | 0.00 |
| ATOM | 725 | CG  | TYR | 46 | -15.320 | -5.676 | -22.611 | 1.00 | 0.00 |
| ATOM | 726 | CD1 | TYR | 46 | -16.512 | -5.102 | -23.067 | 1.00 | 0.00 |
| ATOM | 727 | HD1 | TYR | 46 | -17.410 | -5.151 | -22.451 | 1.00 | 0.00 |

|      |     |     |     |    |         |         |         |      |      |
|------|-----|-----|-----|----|---------|---------|---------|------|------|
| ATOM | 728 | CE1 | TYR | 46 | -16.552 | -4.466  | -24.314 | 1.00 | 0.00 |
| ATOM | 729 | HE1 | TYR | 46 | -17.480 | -4.020  | -24.669 | 1.00 | 0.00 |
| ATOM | 730 | CZ  | TYR | 46 | -15.398 | -4.403  | -25.104 | 1.00 | 0.00 |
| ATOM | 731 | OH  | TYR | 46 | -15.437 | -3.777  | -26.333 | 1.00 | 0.00 |
| ATOM | 732 | HH  | TYR | 46 | -16.303 | -3.422  | -26.546 | 1.00 | 0.00 |
| ATOM | 733 | CE2 | TYR | 46 | -14.205 | -4.976  | -24.648 | 1.00 | 0.00 |
| ATOM | 734 | HE2 | TYR | 46 | -13.307 | -4.927  | -25.264 | 1.00 | 0.00 |
| ATOM | 735 | CD2 | TYR | 46 | -14.165 | -5.613  | -23.401 | 1.00 | 0.00 |
| ATOM | 736 | HD2 | TYR | 46 | -13.236 | -6.059  | -23.046 | 1.00 | 0.00 |
| ATOM | 737 | C   | TYR | 46 | -15.555 | -6.031  | -18.805 | 1.00 | 0.00 |
| ATOM | 738 | O   | TYR | 46 | -16.620 | -6.210  | -18.248 | 1.00 | 0.00 |
| ATOM | 739 | N   | ASP | 47 | -14.435 | -6.436  | -18.271 | 1.00 | 0.00 |
| ATOM | 740 | H   | ASP | 47 | -13.545 | -6.291  | -18.727 | 1.00 | 0.00 |
| ATOM | 741 | CA  | ASP | 47 | -14.448 | -7.132  | -16.954 | 1.00 | 0.00 |
| ATOM | 742 | HA  | ASP | 47 | -15.459 | -7.456  | -16.707 | 1.00 | 0.00 |
| ATOM | 743 | CB  | ASP | 47 | -13.543 | -8.364  | -17.019 | 1.00 | 0.00 |
| ATOM | 744 | HB2 | ASP | 47 | -12.549 | -8.072  | -17.359 | 1.00 | 0.00 |
| ATOM | 745 | HB3 | ASP | 47 | -13.470 | -8.813  | -16.028 | 1.00 | 0.00 |
| ATOM | 746 | CG  | ASP | 47 | -14.137 | -9.381  | -17.996 | 1.00 | 0.00 |
| ATOM | 747 | OD1 | ASP | 47 | -15.297 | -9.232  | -18.343 | 1.00 | 0.00 |
| ATOM | 748 | OD2 | ASP | 47 | -13.421 | -10.290 | -18.383 | 1.00 | 0.00 |
| ATOM | 749 | C   | ASP | 47 | -13.936 | -6.182  | -15.869 | 1.00 | 0.00 |

|      |     |      |     |    |         |        |         |      |      |
|------|-----|------|-----|----|---------|--------|---------|------|------|
| ATOM | 750 | O    | ASP | 47 | -12.813 | -5.718 | -15.916 | 1.00 | 0.00 |
| ATOM | 751 | N    | ILE | 48 | -14.749 | -5.887 | -14.892 | 1.00 | 0.00 |
| ATOM | 752 | H    | ILE | 48 | -15.683 | -6.269 | -14.845 | 1.00 | 0.00 |
| ATOM | 753 | CA   | ILE | 48 | -14.307 | -4.966 | -13.807 | 1.00 | 0.00 |
| ATOM | 754 | HA   | ILE | 48 | -14.059 | -3.994 | -14.233 | 1.00 | 0.00 |
| ATOM | 755 | CB   | ILE | 48 | -15.435 | -4.803 | -12.786 | 1.00 | 0.00 |
| ATOM | 756 | HB   | ILE | 48 | -15.671 | -5.773 | -12.347 | 1.00 | 0.00 |
| ATOM | 757 | CG2  | ILE | 48 | -14.990 | -3.840 | -11.684 | 1.00 | 0.00 |
| ATOM | 758 | HG21 | ILE | 48 | -14.753 | -2.871 | -12.122 | 1.00 | 0.00 |
| ATOM | 759 | HG22 | ILE | 48 | -15.793 | -3.724 | -10.956 | 1.00 | 0.00 |
| ATOM | 760 | HG23 | ILE | 48 | -14.105 | -4.240 | -11.187 | 1.00 | 0.00 |
| ATOM | 761 | CG1  | ILE | 48 | -16.677 | -4.242 | -13.482 | 1.00 | 0.00 |
| ATOM | 762 | HG12 | ILE | 48 | -16.477 | -3.225 | -13.819 | 1.00 | 0.00 |
| ATOM | 763 | HG13 | ILE | 48 | -16.926 | -4.866 | -14.341 | 1.00 | 0.00 |
| ATOM | 764 | CD1  | ILE | 48 | -17.851 | -4.233 | -12.501 | 1.00 | 0.00 |
| ATOM | 765 | HD11 | ILE | 48 | -17.603 | -3.609 | -11.642 | 1.00 | 0.00 |
| ATOM | 766 | HD12 | ILE | 48 | -18.736 | -3.834 | -12.996 | 1.00 | 0.00 |
| ATOM | 767 | HD13 | ILE | 48 | -18.051 | -5.251 | -12.164 | 1.00 | 0.00 |
| ATOM | 768 | C    | ILE | 48 | -13.074 | -5.550 | -13.116 | 1.00 | 0.00 |
| ATOM | 769 | O    | ILE | 48 | -12.119 | -4.854 | -12.836 | 1.00 | 0.00 |
| ATOM | 770 | N    | ARG | 49 | -13.087 | -6.826 | -12.837 | 1.00 | 0.00 |
| ATOM | 771 | H    | ARG | 49 | -13.877 | -7.412 | -13.067 | 1.00 | 0.00 |

|      |     |      |     |    |         |        |         |      |      |
|------|-----|------|-----|----|---------|--------|---------|------|------|
| ATOM | 772 | CA   | ARG | 49 | -11.916 | -7.453 | -12.164 | 1.00 | 0.00 |
| ATOM | 773 | HA   | ARG | 49 | -11.056 | -6.784 | -12.199 | 1.00 | 0.00 |
| ATOM | 774 | CB   | ARG | 49 | -12.258 | -7.733 | -10.699 | 1.00 | 0.00 |
| ATOM | 775 | HB2  | ARG | 49 | -13.143 | -8.368 | -10.646 | 1.00 | 0.00 |
| ATOM | 776 | HB3  | ARG | 49 | -11.420 | -8.239 | -10.220 | 1.00 | 0.00 |
| ATOM | 777 | CG   | ARG | 49 | -12.535 | -6.411 | -9.979  | 1.00 | 0.00 |
| ATOM | 778 | HG2  | ARG | 49 | -13.293 | -5.851 | -10.526 | 1.00 | 0.00 |
| ATOM | 779 | HG3  | ARG | 49 | -12.891 | -6.615 | -8.969  | 1.00 | 0.00 |
| ATOM | 780 | CD   | ARG | 49 | -11.246 | -5.589 | -9.909  | 1.00 | 0.00 |
| ATOM | 781 | HD2  | ARG | 49 | -10.449 | -6.175 | -9.449  | 1.00 | 0.00 |
| ATOM | 782 | HD3  | ARG | 49 | -10.939 | -5.282 | -10.909 | 1.00 | 0.00 |
| ATOM | 783 | NE   | ARG | 49 | -11.479 | -4.370 | -9.085  | 1.00 | 0.00 |
| ATOM | 784 | HE   | ARG | 49 | -12.390 | -4.156 | -8.706  | 1.00 | 0.00 |
| ATOM | 785 | CZ   | ARG | 49 | -10.494 | -3.551 | -8.838  | 1.00 | 0.00 |
| ATOM | 786 | NH1  | ARG | 49 | -9.264  | -3.922 | -9.066  | 1.00 | 0.00 |
| ATOM | 787 | HH11 | ARG | 49 | -9.078  | -4.844 | -9.434  | 1.00 | 0.00 |
| ATOM | 788 | HH12 | ARG | 49 | -8.504  | -3.286 | -8.874  | 1.00 | 0.00 |
| ATOM | 789 | NH2  | ARG | 49 | -10.739 | -2.360 | -8.363  | 1.00 | 0.00 |
| ATOM | 790 | HH21 | ARG | 49 | -11.692 | -2.076 | -8.188  | 1.00 | 0.00 |
| ATOM | 791 | HH22 | ARG | 49 | -9.974  | -1.729 | -8.173  | 1.00 | 0.00 |
| ATOM | 792 | C    | ARG | 49 | -11.568 | -8.768 | -12.866 | 1.00 | 0.00 |
| ATOM | 793 | O    | ARG | 49 | -12.435 | -9.486 | -13.323 | 1.00 | 0.00 |

|      |     |      |     |    |         |         |         |      |      |
|------|-----|------|-----|----|---------|---------|---------|------|------|
| ATOM | 794 | N    | SER | 50 | -10.306 | -9.087  | -12.957 | 1.00 | 0.00 |
| ATOM | 795 | H    | SER | 50 | -9.580  | -8.495  | -12.581 | 1.00 | 0.00 |
| ATOM | 796 | CA   | SER | 50 | -9.905  | -10.354 | -13.630 | 1.00 | 0.00 |
| ATOM | 797 | HA   | SER | 50 | -10.156 | -10.316 | -14.690 | 1.00 | 0.00 |
| ATOM | 798 | CB   | SER | 50 | -8.393  | -10.547 | -13.492 | 1.00 | 0.00 |
| ATOM | 799 | HB2  | SER | 50 | -8.136  | -10.667 | -12.440 | 1.00 | 0.00 |
| ATOM | 800 | HB3  | SER | 50 | -8.087  | -11.437 | -14.044 | 1.00 | 0.00 |
| ATOM | 801 | OG   | SER | 50 | -7.722  | -9.412  | -14.016 | 1.00 | 0.00 |
| ATOM | 802 | HG   | SER | 50 | -6.773  | -9.533  | -13.930 | 1.00 | 0.00 |
| ATOM | 803 | C    | SER | 50 | -10.632 | -11.532 | -12.977 | 1.00 | 0.00 |
| ATOM | 804 | O    | SER | 50 | -11.074 | -12.447 | -13.644 | 1.00 | 0.00 |
| ATOM | 805 | N    | THR | 51 | -10.759 | -11.517 | -11.679 | 1.00 | 0.00 |
| ATOM | 806 | H    | THR | 51 | -10.394 | -10.761 | -11.119 | 1.00 | 0.00 |
| ATOM | 807 | CA   | THR | 51 | -11.457 | -12.636 | -10.986 | 1.00 | 0.00 |
| ATOM | 808 | HA   | THR | 51 | -12.155 | -13.128 | -11.663 | 1.00 | 0.00 |
| ATOM | 809 | CB   | THR | 51 | -10.428 | -13.665 | -10.514 | 1.00 | 0.00 |
| ATOM | 810 | HB   | THR | 51 | -9.765  | -13.921 | -11.341 | 1.00 | 0.00 |
| ATOM | 811 | CG2  | THR | 51 | -9.607  | -13.080 | -9.365  | 1.00 | 0.00 |
| ATOM | 812 | HG21 | THR | 51 | -10.269 | -12.825 | -8.538  | 1.00 | 0.00 |
| ATOM | 813 | HG22 | THR | 51 | -8.874  | -13.815 | -9.030  | 1.00 | 0.00 |
| ATOM | 814 | HG23 | THR | 51 | -9.091  | -12.183 | -9.707  | 1.00 | 0.00 |
| ATOM | 815 | OG1  | THR | 51 | -11.099 | -14.837 | -10.071 | 1.00 | 0.00 |

|      |     |      |     |    |         |         |        |      |      |
|------|-----|------|-----|----|---------|---------|--------|------|------|
| ATOM | 816 | HG1  | THR | 51 | -10.453 | -15.483 | -9.775 | 1.00 | 0.00 |
| ATOM | 817 | C    | THR | 51 | -12.223 | -12.091 | -9.779 | 1.00 | 0.00 |
| ATOM | 818 | O    | THR | 51 | -11.897 | -11.050 | -9.244 | 1.00 | 0.00 |
| ATOM | 819 | N    | ARG | 52 | -13.239 | -12.786 | -9.346 | 1.00 | 0.00 |
| ATOM | 820 | H    | ARG | 52 | -13.515 | -13.653 | -9.785 | 1.00 | 0.00 |
| ATOM | 821 | CA   | ARG | 52 | -14.025 | -12.306 | -8.174 | 1.00 | 0.00 |
| ATOM | 822 | HA   | ARG | 52 | -14.439 | -11.319 | -8.376 | 1.00 | 0.00 |
| ATOM | 823 | CB   | ARG | 52 | -15.178 | -13.274 | -7.902 | 1.00 | 0.00 |
| ATOM | 824 | HB2  | ARG | 52 | -14.784 | -14.283 | -7.773 | 1.00 | 0.00 |
| ATOM | 825 | HB3  | ARG | 52 | -15.702 | -12.971 | -6.996 | 1.00 | 0.00 |
| ATOM | 826 | CG   | ARG | 52 | -16.149 | -13.254 | -9.084 | 1.00 | 0.00 |
| ATOM | 827 | HG2  | ARG | 52 | -16.465 | -12.229 | -9.278 | 1.00 | 0.00 |
| ATOM | 828 | HG3  | ARG | 52 | -15.654 | -13.656 | -9.969 | 1.00 | 0.00 |
| ATOM | 829 | CD   | ARG | 52 | -17.374 | -14.111 | -8.752 | 1.00 | 0.00 |
| ATOM | 830 | HD2  | ARG | 52 | -17.906 | -13.695 | -7.897 | 1.00 | 0.00 |
| ATOM | 831 | HD3  | ARG | 52 | -18.045 | -14.159 | -9.609 | 1.00 | 0.00 |
| ATOM | 832 | NE   | ARG | 52 | -16.934 | -15.493 | -8.413 | 1.00 | 0.00 |
| ATOM | 833 | HE   | ARG | 52 | -16.017 | -15.678 | -8.032 | 1.00 | 0.00 |
| ATOM | 834 | CZ   | ARG | 52 | -17.742 | -16.500 | -8.607 | 1.00 | 0.00 |
| ATOM | 835 | NH1  | ARG | 52 | -18.146 | -17.217 | -7.594 | 1.00 | 0.00 |
| ATOM | 836 | HH11 | ARG | 52 | -17.831 | -16.991 | -6.661 | 1.00 | 0.00 |
| ATOM | 837 | HH12 | ARG | 52 | -18.771 | -17.996 | -7.748 | 1.00 | 0.00 |

|      |     |      |     |    |         |         |         |      |      |
|------|-----|------|-----|----|---------|---------|---------|------|------|
| ATOM | 838 | NH2  | ARG | 52 | -18.145 | -16.789 | -9.813  | 1.00 | 0.00 |
| ATOM | 839 | HH21 | ARG | 52 | -17.830 | -16.232 | -10.594 | 1.00 | 0.00 |
| ATOM | 840 | HH22 | ARG | 52 | -18.770 | -17.569 | -9.960  | 1.00 | 0.00 |
| ATOM | 841 | C    | ARG | 52 | -13.118 | -12.237 | -6.944  | 1.00 | 0.00 |
| ATOM | 842 | O    | ARG | 52 | -13.281 | -11.389 | -6.089  | 1.00 | 0.00 |
| ATOM | 843 | N    | SER | 53 | -12.164 | -13.121 | -6.847  | 1.00 | 0.00 |
| ATOM | 844 | H    | SER | 53 | -12.024 | -13.829 | -7.554  | 1.00 | 0.00 |
| ATOM | 845 | CA   | SER | 53 | -11.248 | -13.106 | -5.672  | 1.00 | 0.00 |
| ATOM | 846 | HA   | SER | 53 | -11.811 | -13.259 | -4.752  | 1.00 | 0.00 |
| ATOM | 847 | CB   | SER | 53 | -10.222 | -14.233 | -5.809  | 1.00 | 0.00 |
| ATOM | 848 | HB2  | SER | 53 | -9.662  | -14.332 | -4.879  | 1.00 | 0.00 |
| ATOM | 849 | HB3  | SER | 53 | -10.736 | -15.170 | -6.024  | 1.00 | 0.00 |
| ATOM | 850 | OG   | SER | 53 | -9.327  | -13.931 | -6.870  | 1.00 | 0.00 |
| ATOM | 851 | HG   | SER | 53 | -8.683  | -14.638 | -6.956  | 1.00 | 0.00 |
| ATOM | 852 | C    | SER | 53 | -10.524 | -11.760 | -5.607  | 1.00 | 0.00 |
| ATOM | 853 | O    | SER | 53 | -10.025 | -11.362 | -4.572  | 1.00 | 0.00 |
| ATOM | 854 | N    | SER | 54 | -10.460 | -11.055 | -6.703  | 1.00 | 0.00 |
| ATOM | 855 | H    | SER | 54 | -10.872 | -11.380 | -7.566  | 1.00 | 0.00 |
| ATOM | 856 | CA   | SER | 54 | -9.767  | -9.736  | -6.703  | 1.00 | 0.00 |
| ATOM | 857 | HA   | SER | 54 | -8.700  | -9.870  | -6.523  | 1.00 | 0.00 |
| ATOM | 858 | CB   | SER | 54 | -9.953  | -9.061  | -8.063  | 1.00 | 0.00 |
| ATOM | 859 | HB2  | SER | 54 | -9.634  | -9.741  | -8.853  | 1.00 | 0.00 |



|      |     |     |     |    |         |         |        |      |      |
|------|-----|-----|-----|----|---------|---------|--------|------|------|
| ATOM | 860 | HB3 | SER | 54 | -11.004 | -8.809  | -8.203 | 1.00 | 0.00 |
| ATOM | 861 | OG  | SER | 54 | -9.172  | -7.877  | -8.115 | 1.00 | 0.00 |
| ATOM | 862 | HG  | SER | 54 | -9.289  | -7.454  | -8.969 | 1.00 | 0.00 |
| ATOM | 863 | C   | SER | 54 | -10.361 | -8.848  | -5.608 | 1.00 | 0.00 |
| ATOM | 864 | O   | SER | 54 | -9.678  | -8.037  | -5.015 | 1.00 | 0.00 |
| ATOM | 865 | N   | ASP | 55 | -11.628 | -8.993  | -5.336 | 1.00 | 0.00 |
| ATOM | 866 | H   | ASP | 55 | -12.202 | -9.664  | -5.826 | 1.00 | 0.00 |
| ATOM | 867 | CA  | ASP | 55 | -12.264 | -8.156  | -4.279 | 1.00 | 0.00 |
| ATOM | 868 | HA  | ASP | 55 | -12.162 | -7.099  | -4.522 | 1.00 | 0.00 |
| ATOM | 869 | CB  | ASP | 55 | -13.753 | -8.496  | -4.187 | 1.00 | 0.00 |
| ATOM | 870 | HB2 | ASP | 55 | -13.873 | -9.573  | -4.068 | 1.00 | 0.00 |
| ATOM | 871 | HB3 | ASP | 55 | -14.190 | -7.986  | -3.329 | 1.00 | 0.00 |
| ATOM | 872 | CG  | ASP | 55 | -14.461 | -8.042  | -5.465 | 1.00 | 0.00 |
| ATOM | 873 | OD1 | ASP | 55 | -13.848 | -7.319  | -6.233 | 1.00 | 0.00 |
| ATOM | 874 | OD2 | ASP | 55 | -15.604 | -8.425  | -5.654 | 1.00 | 0.00 |
| ATOM | 875 | C   | ASP | 55 | -11.593 | -8.435  | -2.933 | 1.00 | 0.00 |
| ATOM | 876 | O   | ASP | 55 | -11.591 | -7.605  | -2.046 | 1.00 | 0.00 |
| ATOM | 877 | N   | GLN | 56 | -11.022 | -9.598  | -2.774 | 1.00 | 0.00 |
| ATOM | 878 | H   | GLN | 56 | -11.019 | -10.293 | -3.507 | 1.00 | 0.00 |
| ATOM | 879 | CA  | GLN | 56 | -10.351 | -9.928  | -1.485 | 1.00 | 0.00 |
| ATOM | 880 | HA  | GLN | 56 | -11.053 | -9.832  | -0.657 | 1.00 | 0.00 |
| ATOM | 881 | CB  | GLN | 56 | -9.843  | -11.370 | -1.530 | 1.00 | 0.00 |

|      |     |      |     |    |         |         |        |      |      |
|------|-----|------|-----|----|---------|---------|--------|------|------|
| ATOM | 882 | HB2  | GLN | 56 | -9.125  | -11.478 | -2.344 | 1.00 | 0.00 |
| ATOM | 883 | HB3  | GLN | 56 | -9.358  | -11.615 | -0.585 | 1.00 | 0.00 |
| ATOM | 884 | CG   | GLN | 56 | -11.020 | -12.320 | -1.760 | 1.00 | 0.00 |
| ATOM | 885 | HG2  | GLN | 56 | -11.860 | -12.044 | -1.123 | 1.00 | 0.00 |
| ATOM | 886 | HG3  | GLN | 56 | -11.331 | -12.290 | -2.804 | 1.00 | 0.00 |
| ATOM | 887 | CD   | GLN | 56 | -10.596 | -13.750 | -1.418 | 1.00 | 0.00 |
| ATOM | 888 | OE1  | GLN | 56 | -11.379 | -14.521 | -0.901 | 1.00 | 0.00 |
| ATOM | 889 | NE2  | GLN | 56 | -9.380  | -14.139 | -1.688 | 1.00 | 0.00 |
| ATOM | 890 | HE21 | GLN | 56 | -9.093  | -15.082 | -1.465 | 1.00 | 0.00 |
| ATOM | 891 | HE22 | GLN | 56 | -8.731  | -13.496 | -2.119 | 1.00 | 0.00 |
| ATOM | 892 | C    | GLN | 56 | -9.171  | -8.980  | -1.264 | 1.00 | 0.00 |
| ATOM | 893 | O    | GLN | 56 | -8.868  | -8.600  | -0.151 | 1.00 | 0.00 |
| ATOM | 894 | N    | GLN | 57 | -8.503  | -8.595  | -2.317 | 1.00 | 0.00 |
| ATOM | 895 | H    | GLN | 57 | -8.749  | -8.908  | -3.245 | 1.00 | 0.00 |
| ATOM | 896 | CA   | GLN | 57 | -7.342  | -7.673  | -2.167 | 1.00 | 0.00 |
| ATOM | 897 | HA   | GLN | 57 | -6.496  | -8.199  | -1.723 | 1.00 | 0.00 |
| ATOM | 898 | CB   | GLN | 57 | -6.925  | -7.150  | -3.543 | 1.00 | 0.00 |
| ATOM | 899 | HB2  | GLN | 57 | -7.771  | -6.653  | -4.016 | 1.00 | 0.00 |
| ATOM | 900 | HB3  | GLN | 57 | -6.104  | -6.442  | -3.431 | 1.00 | 0.00 |
| ATOM | 901 | CG   | GLN | 57 | -6.471  | -8.322  | -4.415 | 1.00 | 0.00 |
| ATOM | 902 | HG2  | GLN | 57 | -5.583  | -8.789  | -3.989 | 1.00 | 0.00 |
| ATOM | 903 | HG3  | GLN | 57 | -7.266  | -9.063  | -4.497 | 1.00 | 0.00 |

|      |     |      |     |    |         |        |        |      |      |
|------|-----|------|-----|----|---------|--------|--------|------|------|
| ATOM | 904 | CD   | GLN | 57 | -6.131  | -7.813 | -5.817 | 1.00 | 0.00 |
| ATOM | 905 | OE1  | GLN | 57 | -6.525  | -6.728 | -6.195 | 1.00 | 0.00 |
| ATOM | 906 | NE2  | GLN | 57 | -5.409  | -8.558 | -6.610 | 1.00 | 0.00 |
| ATOM | 907 | HE21 | GLN | 57 | -5.180  | -8.230 | -7.537 | 1.00 | 0.00 |
| ATOM | 908 | HE22 | GLN | 57 | -5.082  | -9.460 | -6.293 | 1.00 | 0.00 |
| ATOM | 909 | C    | GLN | 57 | -7.737  | -6.497 | -1.270 | 1.00 | 0.00 |
| ATOM | 910 | O    | GLN | 57 | -7.008  | -6.112 | -0.378 | 1.00 | 0.00 |
| ATOM | 911 | N    | GLN | 58 | -8.886  | -5.922 | -1.500 | 1.00 | 0.00 |
| ATOM | 912 | H    | GLN | 58 | -9.498  | -6.237 | -2.239 | 1.00 | 0.00 |
| ATOM | 913 | CA   | GLN | 58 | -9.325  | -4.773 | -0.661 | 1.00 | 0.00 |
| ATOM | 914 | HA   | GLN | 58 | -8.743  | -3.884 | -0.904 | 1.00 | 0.00 |
| ATOM | 915 | CB   | GLN | 58 | -10.803 | -4.479 | -0.929 | 1.00 | 0.00 |
| ATOM | 916 | HB2  | GLN | 58 | -11.404 | -5.340 | -0.635 | 1.00 | 0.00 |
| ATOM | 917 | HB3  | GLN | 58 | -11.111 | -3.608 | -0.352 | 1.00 | 0.00 |
| ATOM | 918 | CG   | GLN | 58 | -11.006 | -4.201 | -2.420 | 1.00 | 0.00 |
| ATOM | 919 | HG2  | GLN | 58 | -10.223 | -3.541 | -2.794 | 1.00 | 0.00 |
| ATOM | 920 | HG3  | GLN | 58 | -10.993 | -5.134 | -2.984 | 1.00 | 0.00 |
| ATOM | 921 | CD   | GLN | 58 | -12.361 | -3.521 | -2.630 | 1.00 | 0.00 |
| ATOM | 922 | OE1  | GLN | 58 | -12.503 | -2.679 | -3.494 | 1.00 | 0.00 |
| ATOM | 923 | NE2  | GLN | 58 | -13.369 | -3.854 | -1.872 | 1.00 | 0.00 |
| ATOM | 924 | HE21 | GLN | 58 | -14.266 | -3.410 | -2.005 | 1.00 | 0.00 |
| ATOM | 925 | HE22 | GLN | 58 | -13.248 | -4.556 | -1.155 | 1.00 | 0.00 |

|      |     |      |     |    |         |         |       |      |      |
|------|-----|------|-----|----|---------|---------|-------|------|------|
| ATOM | 926 | C    | GLN | 58 | -9.137  | -5.120  | 0.817 | 1.00 | 0.00 |
| ATOM | 927 | O    | GLN | 58 | -8.705  | -4.303  | 1.606 | 1.00 | 0.00 |
| ATOM | 928 | N    | ARG | 59 | -9.459  | -6.326  | 1.199 | 1.00 | 0.00 |
| ATOM | 929 | H    | ARG | 59 | -9.819  | -7.011  | 0.549 | 1.00 | 0.00 |
| ATOM | 930 | CA   | ARG | 59 | -9.301  | -6.722  | 2.626 | 1.00 | 0.00 |
| ATOM | 931 | HA   | ARG | 59 | -10.037 | -6.209  | 3.245 | 1.00 | 0.00 |
| ATOM | 932 | CB   | ARG | 59 | -9.514  | -8.231  | 2.763 | 1.00 | 0.00 |
| ATOM | 933 | HB2  | ARG | 59 | -8.785  | -8.760  | 2.148 | 1.00 | 0.00 |
| ATOM | 934 | HB3  | ARG | 59 | -9.389  | -8.524  | 3.806 | 1.00 | 0.00 |
| ATOM | 935 | CG   | ARG | 59 | -10.927 | -8.589  | 2.299 | 1.00 | 0.00 |
| ATOM | 936 | HG2  | ARG | 59 | -11.656 | -8.035  | 2.890 | 1.00 | 0.00 |
| ATOM | 937 | HG3  | ARG | 59 | -11.041 | -8.330  | 1.246 | 1.00 | 0.00 |
| ATOM | 938 | CD   | ARG | 59 | -11.158 | -10.091 | 2.482 | 1.00 | 0.00 |
| ATOM | 939 | HD2  | ARG | 59 | -10.369 | -10.658 | 1.988 | 1.00 | 0.00 |
| ATOM | 940 | HD3  | ARG | 59 | -11.177 | -10.345 | 3.542 | 1.00 | 0.00 |
| ATOM | 941 | NE   | ARG | 59 | -12.467 | -10.468 | 1.877 | 1.00 | 0.00 |
| ATOM | 942 | HE   | ARG | 59 | -12.560 | -10.646 | 0.887 | 1.00 | 0.00 |
| ATOM | 943 | CZ   | ARG | 59 | -13.527 | -10.576 | 2.632 | 1.00 | 0.00 |
| ATOM | 944 | NH1  | ARG | 59 | -13.826 | -11.723 | 3.177 | 1.00 | 0.00 |
| ATOM | 945 | HH11 | ARG | 59 | -13.235 | -12.526 | 3.013 | 1.00 | 0.00 |
| ATOM | 946 | HH12 | ARG | 59 | -14.646 | -11.803 | 3.760 | 1.00 | 0.00 |
| ATOM | 947 | NH2  | ARG | 59 | -14.287 | -9.535  | 2.841 | 1.00 | 0.00 |

|      |     |      |     |    |         |        |       |      |      |
|------|-----|------|-----|----|---------|--------|-------|------|------|
| ATOM | 948 | HH21 | ARG | 59 | -14.052 | -8.649 | 2.417 | 1.00 | 0.00 |
| ATOM | 949 | HH22 | ARG | 59 | -15.106 | -9.621 | 3.425 | 1.00 | 0.00 |
| ATOM | 950 | C    | ARG | 59 | -7.896  | -6.358 | 3.105 | 1.00 | 0.00 |
| ATOM | 951 | O    | ARG | 59 | -7.682  | -6.065 | 4.264 | 1.00 | 0.00 |
| ATOM | 952 | N    | CYX | 60 | -6.936  | -6.367 | 2.223 | 1.00 | 0.00 |
| ATOM | 953 | H    | CYX | 60 | -7.103  | -6.607 | 1.256 | 1.00 | 0.00 |
| ATOM | 954 | CA   | CYX | 60 | -5.548  | -6.015 | 2.633 | 1.00 | 0.00 |
| ATOM | 955 | HA   | CYX | 60 | -5.098  | -6.835 | 3.194 | 1.00 | 0.00 |
| ATOM | 956 | CB   | CYX | 60 | -4.701  | -5.754 | 1.384 | 1.00 | 0.00 |
| ATOM | 957 | HB2  | CYX | 60 | -4.450  | -6.703 | 0.909 | 1.00 | 0.00 |
| ATOM | 958 | HB3  | CYX | 60 | -5.264  | -5.136 | 0.685 | 1.00 | 0.00 |
| ATOM | 959 | SG   | CYX | 60 | -3.143  | -4.962 | 1.856 | 1.00 | 0.00 |
| ATOM | 960 | C    | CYX | 60 | -5.590  | -4.755 | 3.500 | 1.00 | 0.00 |
| ATOM | 961 | O    | CYX | 60 | -5.678  | -4.824 | 4.711 | 1.00 | 0.00 |
| ATOM | 962 | N    | CYX | 61 | -5.528  | -3.607 | 2.888 | 1.00 | 0.00 |
| ATOM | 963 | H    | CYX | 61 | -5.451  | -3.544 | 1.883 | 1.00 | 0.00 |
| ATOM | 964 | CA   | CYX | 61 | -5.566  | -2.342 | 3.675 | 1.00 | 0.00 |
| ATOM | 965 | HA   | CYX | 61 | -4.594  | -2.155 | 4.133 | 1.00 | 0.00 |
| ATOM | 966 | CB   | CYX | 61 | -5.906  | -1.171 | 2.752 | 1.00 | 0.00 |
| ATOM | 967 | HB2  | CYX | 61 | -5.984  | -1.528 | 1.725 | 1.00 | 0.00 |
| ATOM | 968 | HB3  | CYX | 61 | -6.855  | -0.732 | 3.057 | 1.00 | 0.00 |
| ATOM | 969 | SG   | CYX | 61 | -4.572  | 0.052  | 2.815 | 1.00 | 0.00 |

|      |     |     |     |    |         |        |       |      |      |
|------|-----|-----|-----|----|---------|--------|-------|------|------|
| ATOM | 970 | C   | CYX | 61 | -6.630  | -2.459 | 4.769 | 1.00 | 0.00 |
| ATOM | 971 | O   | CYX | 61 | -6.443  | -2.008 | 5.881 | 1.00 | 0.00 |
| ATOM | 972 | N   | ASP | 62 | -7.744  | -3.063 | 4.460 | 1.00 | 0.00 |
| ATOM | 973 | H   | ASP | 62 | -7.905  | -3.441 | 3.537 | 1.00 | 0.00 |
| ATOM | 974 | CA  | ASP | 62 | -8.820  | -3.209 | 5.482 | 1.00 | 0.00 |
| ATOM | 975 | HA  | ASP | 62 | -9.150  | -2.229 | 5.825 | 1.00 | 0.00 |
| ATOM | 976 | CB  | ASP | 62 | -10.014 | -3.939 | 4.866 | 1.00 | 0.00 |
| ATOM | 977 | HB2 | ASP | 62 | -9.683  | -4.889 | 4.446 | 1.00 | 0.00 |
| ATOM | 978 | HB3 | ASP | 62 | -10.763 | -4.124 | 5.635 | 1.00 | 0.00 |
| ATOM | 979 | CG  | ASP | 62 | -10.623 | -3.077 | 3.758 | 1.00 | 0.00 |
| ATOM | 980 | OD1 | ASP | 62 | -10.269 | -1.911 | 3.680 | 1.00 | 0.00 |
| ATOM | 981 | OD2 | ASP | 62 | -11.432 | -3.595 | 3.006 | 1.00 | 0.00 |
| ATOM | 982 | C   | ASP | 62 | -8.289  | -4.012 | 6.669 | 1.00 | 0.00 |
| ATOM | 983 | O   | ASP | 62 | -8.619  | -3.748 | 7.809 | 1.00 | 0.00 |
| ATOM | 984 | N   | GLU | 63 | -7.465  | -4.988 | 6.413 | 1.00 | 0.00 |
| ATOM | 985 | H   | GLU | 63 | -7.186  | -5.215 | 5.469 | 1.00 | 0.00 |
| ATOM | 986 | CA  | GLU | 63 | -6.908  | -5.803 | 7.528 | 1.00 | 0.00 |
| ATOM | 987 | HA  | GLU | 63 | -7.715  | -6.235 | 8.120 | 1.00 | 0.00 |
| ATOM | 988 | CB  | GLU | 63 | -6.059  | -6.940 | 6.956 | 1.00 | 0.00 |
| ATOM | 989 | HB2 | GLU | 63 | -5.455  | -6.563 | 6.130 | 1.00 | 0.00 |
| ATOM | 990 | HB3 | GLU | 63 | -5.404  | -7.332 | 7.734 | 1.00 | 0.00 |
| ATOM | 991 | CG  | GLU | 63 | -6.974  | -8.056 | 6.450 | 1.00 | 0.00 |

|      |      |      |     |    |        |         |       |      |      |
|------|------|------|-----|----|--------|---------|-------|------|------|
| ATOM | 992  | HG2  | GLU | 63 | -7.651 | -8.361  | 7.248 | 1.00 | 0.00 |
| ATOM | 993  | HG3  | GLU | 63 | -7.554 | -7.694  | 5.601 | 1.00 | 0.00 |
| ATOM | 994  | CD   | GLU | 63 | -6.127 | -9.253  | 6.015 | 1.00 | 0.00 |
| ATOM | 995  | OE1  | GLU | 63 | -4.915 | -9.171  | 6.135 | 1.00 | 0.00 |
| ATOM | 996  | OE2  | GLU | 63 | -6.704 | -10.232 | 5.569 | 1.00 | 0.00 |
| ATOM | 997  | C    | GLU | 63 | -6.040 | -4.910  | 8.415 | 1.00 | 0.00 |
| ATOM | 998  | O    | GLU | 63 | -6.182 | -4.888  | 9.621 | 1.00 | 0.00 |
| ATOM | 999  | N    | LEU | 64 | -5.141 | -4.172  | 7.824 | 1.00 | 0.00 |
| ATOM | 1000 | H    | LEU | 64 | -5.020 | -4.188  | 6.821 | 1.00 | 0.00 |
| ATOM | 1001 | CA   | LEU | 64 | -4.261 | -3.278  | 8.627 | 1.00 | 0.00 |
| ATOM | 1002 | HA   | LEU | 64 | -3.786 | -3.838  | 9.433 | 1.00 | 0.00 |
| ATOM | 1003 | CB   | LEU | 64 | -3.169 | -2.696  | 7.726 | 1.00 | 0.00 |
| ATOM | 1004 | HB2  | LEU | 64 | -3.619 | -2.030  | 6.991 | 1.00 | 0.00 |
| ATOM | 1005 | HB3  | LEU | 64 | -2.456 | -2.138  | 8.334 | 1.00 | 0.00 |
| ATOM | 1006 | CG   | LEU | 64 | -2.443 | -3.833  | 7.005 | 1.00 | 0.00 |
| ATOM | 1007 | HG   | LEU | 64 | -3.134 | -4.336  | 6.328 | 1.00 | 0.00 |
| ATOM | 1008 | CD1  | LEU | 64 | -1.271 | -3.261  | 6.204 | 1.00 | 0.00 |
| ATOM | 1009 | HD11 | LEU | 64 | -0.579 | -2.759  | 6.880 | 1.00 | 0.00 |
| ATOM | 1010 | HD12 | LEU | 64 | -0.752 | -4.071  | 5.690 | 1.00 | 0.00 |
| ATOM | 1011 | HD13 | LEU | 64 | -1.645 | -2.547  | 5.471 | 1.00 | 0.00 |
| ATOM | 1012 | CD2  | LEU | 64 | -1.915 | -4.836  | 8.032 | 1.00 | 0.00 |
| ATOM | 1013 | HD21 | LEU | 64 | -2.748 | -5.244  | 8.604 | 1.00 | 0.00 |

|      |      |      |     |    |        |        |        |      |      |
|------|------|------|-----|----|--------|--------|--------|------|------|
| ATOM | 1014 | HD22 | LEU | 64 | -1.398 | -5.646 | 7.517  | 1.00 | 0.00 |
| ATOM | 1015 | HD23 | LEU | 64 | -1.222 | -4.335 | 8.707  | 1.00 | 0.00 |
| ATOM | 1016 | C    | LEU | 64 | -5.088 | -2.135 | 9.224  | 1.00 | 0.00 |
| ATOM | 1017 | O    | LEU | 64 | -4.577 | -1.298 | 9.940  | 1.00 | 0.00 |
| ATOM | 1018 | N    | ASN | 65 | -6.362 | -2.091 | 8.938  | 1.00 | 0.00 |
| ATOM | 1019 | H    | ASN | 65 | -6.798 | -2.783 | 8.346  | 1.00 | 0.00 |
| ATOM | 1020 | CA   | ASN | 65 | -7.212 | -0.999 | 9.495  | 1.00 | 0.00 |
| ATOM | 1021 | HA   | ASN | 65 | -6.587 | -0.187 | 9.867  | 1.00 | 0.00 |
| ATOM | 1022 | CB   | ASN | 65 | -8.124 | -0.450 | 8.396  | 1.00 | 0.00 |
| ATOM | 1023 | HB2  | ASN | 65 | -8.810 | -1.226 | 8.055  | 1.00 | 0.00 |
| ATOM | 1024 | HB3  | ASN | 65 | -8.694 | 0.401  | 8.768  | 1.00 | 0.00 |
| ATOM | 1025 | CG   | ASN | 65 | -7.278 | 0.010  | 7.210  | 1.00 | 0.00 |
| ATOM | 1026 | OD1  | ASN | 65 | -7.794 | -0.003 | 6.011  | 1.00 | 0.00 |
| ATOM | 1027 | ND2  | ASN | 65 | -6.133 | 0.385  | 7.373  | 1.00 | 0.00 |
| ATOM | 1028 | HD21 | ASN | 65 | -5.585 | 0.686  | 6.579  | 1.00 | 0.00 |
| ATOM | 1029 | HD22 | ASN | 65 | -5.735 | 0.393  | 8.301  | 1.00 | 0.00 |
| ATOM | 1030 | C    | ASN | 65 | -8.071 | -1.549 | 10.636 | 1.00 | 0.00 |
| ATOM | 1031 | O    | ASN | 65 | -8.711 | -0.808 | 11.354 | 1.00 | 0.00 |
| ATOM | 1032 | N    | GLU | 66 | -8.093 | -2.843 | 10.808 | 1.00 | 0.00 |
| ATOM | 1033 | H    | GLU | 66 | -7.564 | -3.469 | 10.217 | 1.00 | 0.00 |
| ATOM | 1034 | CA   | GLU | 66 | -8.917 | -3.432 | 11.903 | 1.00 | 0.00 |
| ATOM | 1035 | HA   | GLU | 66 | -9.092 | -2.694 | 12.685 | 1.00 | 0.00 |



|      |      |     |     |    |         |         |        |      |      |
|------|------|-----|-----|----|---------|---------|--------|------|------|
| ATOM | 1036 | CB  | GLU | 66 | -10.268 | -3.875  | 11.338 | 1.00 | 0.00 |
| ATOM | 1037 | HB2 | GLU | 66 | -10.117 | -4.696  | 10.637 | 1.00 | 0.00 |
| ATOM | 1038 | HB3 | GLU | 66 | -10.911 | -4.208  | 12.153 | 1.00 | 0.00 |
| ATOM | 1039 | CG  | GLU | 66 | -10.929 | -2.701  | 10.614 | 1.00 | 0.00 |
| ATOM | 1040 | HG2 | GLU | 66 | -11.185 | -1.927  | 11.337 | 1.00 | 0.00 |
| ATOM | 1041 | HG3 | GLU | 66 | -10.239 | -2.294  | 9.875  | 1.00 | 0.00 |
| ATOM | 1042 | CD  | GLU | 66 | -12.200 | -3.184  | 9.913  | 1.00 | 0.00 |
| ATOM | 1043 | OE1 | GLU | 66 | -12.388 | -4.388  | 9.835  | 1.00 | 0.00 |
| ATOM | 1044 | OE2 | GLU | 66 | -12.963 | -2.344  | 9.466  | 1.00 | 0.00 |
| ATOM | 1045 | C   | GLU | 66 | -8.197  | -4.643  | 12.504 | 1.00 | 0.00 |
| ATOM | 1046 | O   | GLU | 66 | -8.318  | -4.927  | 13.678 | 1.00 | 0.00 |
| ATOM | 1047 | N   | MET | 67 | -7.453  | -5.362  | 11.709 | 1.00 | 0.00 |
| ATOM | 1048 | H   | MET | 67 | -7.345  | -5.137  | 10.730 | 1.00 | 0.00 |
| ATOM | 1049 | CA  | MET | 67 | -6.735  | -6.555  | 12.242 | 1.00 | 0.00 |
| ATOM | 1050 | HA  | MET | 67 | -7.400  | -7.148  | 12.870 | 1.00 | 0.00 |
| ATOM | 1051 | CB  | MET | 67 | -6.259  | -7.425  | 11.077 | 1.00 | 0.00 |
| ATOM | 1052 | HB2 | MET | 67 | -6.429  | -6.901  | 10.137 | 1.00 | 0.00 |
| ATOM | 1053 | HB3 | MET | 67 | -5.195  | -7.633  | 11.189 | 1.00 | 0.00 |
| ATOM | 1054 | CG  | MET | 67 | -7.038  | -8.742  | 11.074 | 1.00 | 0.00 |
| ATOM | 1055 | HG2 | MET | 67 | -7.458  | -8.925  | 12.063 | 1.00 | 0.00 |
| ATOM | 1056 | HG3 | MET | 67 | -7.843  | -8.693  | 10.341 | 1.00 | 0.00 |
| ATOM | 1057 | SD  | MET | 67 | -5.923  | -10.100 | 10.641 | 1.00 | 0.00 |

|      |      |     |     |    |        |         |        |      |      |
|------|------|-----|-----|----|--------|---------|--------|------|------|
| ATOM | 1058 | CE  | MET | 67 | -5.813 | -9.746  | 8.870  | 1.00 | 0.00 |
| ATOM | 1059 | HE1 | MET | 67 | -5.405 | -8.746  | 8.723  | 1.00 | 0.00 |
| ATOM | 1060 | HE2 | MET | 67 | -5.160 | -10.478 | 8.393  | 1.00 | 0.00 |
| ATOM | 1061 | HE3 | MET | 67 | -6.806 | -9.802  | 8.425  | 1.00 | 0.00 |
| ATOM | 1062 | C   | MET | 67 | -5.530 | -6.103  | 13.066 | 1.00 | 0.00 |
| ATOM | 1063 | O   | MET | 67 | -5.548 | -6.133  | 14.281 | 1.00 | 0.00 |
| ATOM | 1064 | N   | GLU | 68 | -4.482 | -5.687  | 12.415 | 1.00 | 0.00 |
| ATOM | 1065 | H   | GLU | 68 | -4.461 | -5.663  | 11.405 | 1.00 | 0.00 |
| ATOM | 1066 | CA  | GLU | 68 | -3.272 | -5.235  | 13.157 | 1.00 | 0.00 |
| ATOM | 1067 | HA  | GLU | 68 | -3.066 | -5.907  | 13.991 | 1.00 | 0.00 |
| ATOM | 1068 | CB  | GLU | 68 | -2.066 | -5.241  | 12.216 | 1.00 | 0.00 |
| ATOM | 1069 | HB2 | GLU | 68 | -2.157 | -4.423  | 11.502 | 1.00 | 0.00 |
| ATOM | 1070 | HB3 | GLU | 68 | -1.151 | -5.117  | 12.796 | 1.00 | 0.00 |
| ATOM | 1071 | CG  | GLU | 68 | -2.015 | -6.571  | 11.462 | 1.00 | 0.00 |
| ATOM | 1072 | HG2 | GLU | 68 | -1.810 | -7.380  | 12.164 | 1.00 | 0.00 |
| ATOM | 1073 | HG3 | GLU | 68 | -2.973 | -6.749  | 10.974 | 1.00 | 0.00 |
| ATOM | 1074 | CD  | GLU | 68 | -0.908 | -6.519  | 10.407 | 1.00 | 0.00 |
| ATOM | 1075 | OE1 | GLU | 68 | -0.339 | -5.455  | 10.225 | 1.00 | 0.00 |
| ATOM | 1076 | OE2 | GLU | 68 | -0.647 | -7.545  | 9.799  | 1.00 | 0.00 |
| ATOM | 1077 | C   | GLU | 68 | -3.495 | -3.819  | 13.693 | 1.00 | 0.00 |
| ATOM | 1078 | O   | GLU | 68 | -2.613 | -3.221  | 14.276 | 1.00 | 0.00 |
| ATOM | 1079 | N   | ASN | 69 | -4.667 | -3.278  | 13.502 | 1.00 | 0.00 |

|      |      |      |     |    |        |        |        |      |      |
|------|------|------|-----|----|--------|--------|--------|------|------|
| ATOM | 1080 | H    | ASN | 69 | -5.407 | -3.768 | 13.020 | 1.00 | 0.00 |
| ATOM | 1081 | CA   | ASN | 69 | -4.940 | -1.900 | 14.002 | 1.00 | 0.00 |
| ATOM | 1082 | HA   | ASN | 69 | -5.864 | -1.517 | 13.570 | 1.00 | 0.00 |
| ATOM | 1083 | CB   | ASN | 69 | -5.088 | -1.931 | 15.525 | 1.00 | 0.00 |
| ATOM | 1084 | HB2  | ASN | 69 | -4.154 | -2.250 | 15.989 | 1.00 | 0.00 |
| ATOM | 1085 | HB3  | ASN | 69 | -5.360 | -0.944 | 15.898 | 1.00 | 0.00 |
| ATOM | 1086 | CG   | ASN | 69 | -6.188 | -2.920 | 15.911 | 1.00 | 0.00 |
| ATOM | 1087 | OD1  | ASN | 69 | -7.123 | -3.132 | 15.163 | 1.00 | 0.00 |
| ATOM | 1088 | ND2  | ASN | 69 | -6.117 | -3.541 | 17.057 | 1.00 | 0.00 |
| ATOM | 1089 | HD21 | ASN | 69 | -6.840 | -4.196 | 17.319 | 1.00 | 0.00 |
| ATOM | 1090 | HD22 | ASN | 69 | -5.339 | -3.364 | 17.677 | 1.00 | 0.00 |
| ATOM | 1091 | C    | ASN | 69 | -3.777 | -0.982 | 13.619 | 1.00 | 0.00 |
| ATOM | 1092 | O    | ASN | 69 | -3.520 | 0.012  | 14.269 | 1.00 | 0.00 |
| ATOM | 1093 | N    | THR | 70 | -3.074 | -1.309 | 12.571 | 1.00 | 0.00 |
| ATOM | 1094 | H    | THR | 70 | -3.285 | -2.135 | 12.028 | 1.00 | 0.00 |
| ATOM | 1095 | CA   | THR | 70 | -1.926 | -0.457 | 12.145 | 1.00 | 0.00 |
| ATOM | 1096 | HA   | THR | 70 | -1.059 | -0.641 | 12.779 | 1.00 | 0.00 |
| ATOM | 1097 | CB   | THR | 70 | -1.553 | -0.791 | 10.698 | 1.00 | 0.00 |
| ATOM | 1098 | HB   | THR | 70 | -0.544 | -0.433 | 10.492 | 1.00 | 0.00 |
| ATOM | 1099 | CG2  | THR | 70 | -1.608 | -2.306 | 10.490 | 1.00 | 0.00 |
| ATOM | 1100 | HG21 | THR | 70 | -2.616 | -2.666 | 10.696 | 1.00 | 0.00 |
| ATOM | 1101 | HG22 | THR | 70 | -1.342 | -2.542 | 9.459  | 1.00 | 0.00 |

|      |      |      |     |    |        |        |        |      |      |
|------|------|------|-----|----|--------|--------|--------|------|------|
| ATOM | 1102 | HG23 | THR | 70 | -0.904 | -2.792 | 11.166 | 1.00 | 0.00 |
| ATOM | 1103 | OG1  | THR | 70 | -2.467 | -0.156 | 9.815  | 1.00 | 0.00 |
| ATOM | 1104 | HG1  | THR | 70 | -2.233 | -0.366 | 8.908  | 1.00 | 0.00 |
| ATOM | 1105 | C    | THR | 70 | -2.321 | 1.018  | 12.242 | 1.00 | 0.00 |
| ATOM | 1106 | O    | THR | 70 | -3.487 | 1.360  | 12.249 | 1.00 | 0.00 |
| ATOM | 1107 | N    | GLN | 71 | -1.358 | 1.897  | 12.318 | 1.00 | 0.00 |
| ATOM | 1108 | H    | GLN | 71 | -0.386 | 1.621  | 12.313 | 1.00 | 0.00 |
| ATOM | 1109 | CA   | GLN | 71 | -1.681 | 3.349  | 12.415 | 1.00 | 0.00 |
| ATOM | 1110 | HA   | GLN | 71 | -2.300 | 3.655  | 11.572 | 1.00 | 0.00 |
| ATOM | 1111 | CB   | GLN | 71 | -2.451 | 3.615  | 13.709 | 1.00 | 0.00 |
| ATOM | 1112 | HB2  | GLN | 71 | -3.391 | 3.064  | 13.693 | 1.00 | 0.00 |
| ATOM | 1113 | HB3  | GLN | 71 | -1.854 | 3.290  | 14.561 | 1.00 | 0.00 |
| ATOM | 1114 | CG   | GLN | 71 | -2.740 | 5.114  | 13.830 | 1.00 | 0.00 |
| ATOM | 1115 | HG2  | GLN | 71 | -1.828 | 5.688  | 13.667 | 1.00 | 0.00 |
| ATOM | 1116 | HG3  | GLN | 71 | -3.493 | 5.414  | 13.101 | 1.00 | 0.00 |
| ATOM | 1117 | CD   | GLN | 71 | -3.268 | 5.421  | 15.234 | 1.00 | 0.00 |
| ATOM | 1118 | OE1  | GLN | 71 | -2.667 | 5.041  | 16.219 | 1.00 | 0.00 |
| ATOM | 1119 | NE2  | GLN | 71 | -4.376 | 6.098  | 15.366 | 1.00 | 0.00 |
| ATOM | 1120 | HE21 | GLN | 71 | -4.731 | 6.304  | 16.289 | 1.00 | 0.00 |
| ATOM | 1121 | HE22 | GLN | 71 | -4.873 | 6.412  | 14.545 | 1.00 | 0.00 |
| ATOM | 1122 | C    | GLN | 71 | -0.384 | 4.162  | 12.417 | 1.00 | 0.00 |
| ATOM | 1123 | O    | GLN | 71 | -0.328 | 5.259  | 11.897 | 1.00 | 0.00 |

|      |      |     |     |    |       |       |        |      |      |
|------|------|-----|-----|----|-------|-------|--------|------|------|
| ATOM | 1124 | N   | GLY | 72 | 0.658 | 3.636 | 13.002 | 1.00 | 0.00 |
| ATOM | 1125 | H   | GLY | 72 | 0.620 | 2.725 | 13.438 | 1.00 | 0.00 |
| ATOM | 1126 | CA  | GLY | 72 | 1.947 | 4.383 | 13.038 | 1.00 | 0.00 |
| ATOM | 1127 | HA2 | GLY | 72 | 1.789 | 5.411 | 12.712 | 1.00 | 0.00 |
| ATOM | 1128 | HA3 | GLY | 72 | 2.349 | 4.380 | 14.051 | 1.00 | 0.00 |
| ATOM | 1129 | C   | GLY | 72 | 2.955 | 3.713 | 12.101 | 1.00 | 0.00 |
| ATOM | 1130 | O   | GLY | 72 | 2.817 | 2.558 | 11.748 | 1.00 | 0.00 |
| ATOM | 1131 | N   | CYX | 73 | 3.969 | 4.428 | 11.698 | 1.00 | 0.00 |
| ATOM | 1132 | H   | CYX | 73 | 4.089 | 5.388 | 11.988 | 1.00 | 0.00 |
| ATOM | 1133 | CA  | CYX | 73 | 4.985 | 3.834 | 10.785 | 1.00 | 0.00 |
| ATOM | 1134 | HA  | CYX | 73 | 5.807 | 4.532 | 10.628 | 1.00 | 0.00 |
| ATOM | 1135 | CB  | CYX | 73 | 5.544 | 2.553 | 11.407 | 1.00 | 0.00 |
| ATOM | 1136 | HB2 | CYX | 73 | 4.939 | 2.272 | 12.269 | 1.00 | 0.00 |
| ATOM | 1137 | HB3 | CYX | 73 | 5.520 | 1.750 | 10.670 | 1.00 | 0.00 |
| ATOM | 1138 | SG  | CYX | 73 | 7.234 | 2.848 | 11.986 | 1.00 | 0.00 |
| ATOM | 1139 | C   | CYX | 73 | 4.334 | 3.507 | 9.438  | 1.00 | 0.00 |
| ATOM | 1140 | O   | CYX | 73 | 4.919 | 2.855 | 8.596  | 1.00 | 0.00 |
| ATOM | 1141 | N   | MET | 74 | 3.127 | 3.956 | 9.229  | 1.00 | 0.00 |
| ATOM | 1142 | H   | MET | 74 | 2.636 | 4.499 | 9.924  | 1.00 | 0.00 |
| ATOM | 1143 | CA  | MET | 74 | 2.439 | 3.671 | 7.939  | 1.00 | 0.00 |
| ATOM | 1144 | HA  | MET | 74 | 2.075 | 2.643 | 7.923  | 1.00 | 0.00 |
| ATOM | 1145 | CB  | MET | 74 | 1.245 | 4.616 | 7.778  | 1.00 | 0.00 |

|      |      |         |    |        |       |       |      |      |
|------|------|---------|----|--------|-------|-------|------|------|
| ATOM | 1146 | HB2 MET | 74 | 1.602  | 5.641 | 7.681 | 1.00 | 0.00 |
| ATOM | 1147 | HB3 MET | 74 | 0.681  | 4.342 | 6.886 | 1.00 | 0.00 |
| ATOM | 1148 | CG MET  | 74 | 0.341  | 4.504 | 9.008 | 1.00 | 0.00 |
| ATOM | 1149 | HG2 MET | 74 | 0.200  | 3.454 | 9.267 | 1.00 | 0.00 |
| ATOM | 1150 | HG3 MET | 74 | 0.796  | 5.027 | 9.849 | 1.00 | 0.00 |
| ATOM | 1151 | SD MET  | 74 | -1.268 | 5.249 | 8.644 | 1.00 | 0.00 |
| ATOM | 1152 | CE MET  | 74 | -2.138 | 3.719 | 8.222 | 1.00 | 0.00 |
| ATOM | 1153 | HE1 MET | 74 | -2.122 | 3.043 | 9.078 | 1.00 | 0.00 |
| ATOM | 1154 | HE2 MET | 74 | -3.170 | 3.948 | 7.959 | 1.00 | 0.00 |
| ATOM | 1155 | HE3 MET | 74 | -1.645 | 3.242 | 7.375 | 1.00 | 0.00 |
| ATOM | 1156 | C MET   | 74 | 3.420  | 3.884 | 6.784 | 1.00 | 0.00 |
| ATOM | 1157 | O MET   | 74 | 3.646  | 3.002 | 5.979 | 1.00 | 0.00 |
| ATOM | 1158 | N CYX   | 75 | 4.006  | 5.047 | 6.697 | 1.00 | 0.00 |
| ATOM | 1159 | H CYX   | 75 | 3.825  | 5.786 | 7.361 | 1.00 | 0.00 |
| ATOM | 1160 | CA CYX  | 75 | 4.972  | 5.310 | 5.594 | 1.00 | 0.00 |
| ATOM | 1161 | HA CYX  | 75 | 4.443  | 5.433 | 4.649 | 1.00 | 0.00 |
| ATOM | 1162 | CB CYX  | 75 | 5.748  | 6.595 | 5.891 | 1.00 | 0.00 |
| ATOM | 1163 | HB2 CYX | 75 | 5.055  | 7.373 | 6.209 | 1.00 | 0.00 |
| ATOM | 1164 | HB3 CYX | 75 | 6.472  | 6.407 | 6.684 | 1.00 | 0.00 |
| ATOM | 1165 | SG CYX  | 75 | 6.570  | 7.164 | 4.383 | 1.00 | 0.00 |
| ATOM | 1166 | C CYX   | 75 | 5.948  | 4.139 | 5.481 | 1.00 | 0.00 |
| ATOM | 1167 | O CYX   | 75 | 6.157  | 3.593 | 4.415 | 1.00 | 0.00 |

|      |      |     |     |    |       |        |        |      |      |
|------|------|-----|-----|----|-------|--------|--------|------|------|
| ATOM | 1168 | N   | GLU | 76 | 6.547 | 3.743  | 6.572  | 1.00 | 0.00 |
| ATOM | 1169 | H   | GLU | 76 | 6.381 | 4.188  | 7.463  | 1.00 | 0.00 |
| ATOM | 1170 | CA  | GLU | 76 | 7.505 | 2.603  | 6.520  | 1.00 | 0.00 |
| ATOM | 1171 | HA  | GLU | 76 | 8.348 | 2.847  | 5.874  | 1.00 | 0.00 |
| ATOM | 1172 | CB  | GLU | 76 | 8.035 | 2.313  | 7.926  | 1.00 | 0.00 |
| ATOM | 1173 | HB2 | GLU | 76 | 7.208 | 2.025  | 8.575  | 1.00 | 0.00 |
| ATOM | 1174 | HB3 | GLU | 76 | 8.760 | 1.500  | 7.881  | 1.00 | 0.00 |
| ATOM | 1175 | CG  | GLU | 76 | 8.709 | 3.567  | 8.485  | 1.00 | 0.00 |
| ATOM | 1176 | HG2 | GLU | 76 | 9.461 | 3.919  | 7.779  | 1.00 | 0.00 |
| ATOM | 1177 | HG3 | GLU | 76 | 7.961 | 4.344  | 8.638  | 1.00 | 0.00 |
| ATOM | 1178 | CD  | GLU | 76 | 9.380 | 3.236  | 9.820  | 1.00 | 0.00 |
| ATOM | 1179 | OE1 | GLU | 76 | 9.373 | 2.073  | 10.192 | 1.00 | 0.00 |
| ATOM | 1180 | OE2 | GLU | 76 | 9.888 | 4.149  | 10.448 | 1.00 | 0.00 |
| ATOM | 1181 | C   | GLU | 76 | 6.784 | 1.367  | 5.979  | 1.00 | 0.00 |
| ATOM | 1182 | O   | GLU | 76 | 7.400 | 0.426  | 5.517  | 1.00 | 0.00 |
| ATOM | 1183 | N   | ALA | 77 | 5.479 | 1.368  | 6.024  | 1.00 | 0.00 |
| ATOM | 1184 | H   | ALA | 77 | 4.961 | 2.146  | 6.405  | 1.00 | 0.00 |
| ATOM | 1185 | CA  | ALA | 77 | 4.717 | 0.199  | 5.505  | 1.00 | 0.00 |
| ATOM | 1186 | HA  | ALA | 77 | 5.186 | -0.749 | 5.772  | 1.00 | 0.00 |
| ATOM | 1187 | CB  | ALA | 77 | 3.296 | 0.219  | 6.073  | 1.00 | 0.00 |
| ATOM | 1188 | HB1 | ALA | 77 | 2.811 | 1.157  | 5.806  | 1.00 | 0.00 |
| ATOM | 1189 | HB2 | ALA | 77 | 2.728 | -0.615 | 5.660  | 1.00 | 0.00 |

|      |      |      |     |    |       |        |        |      |      |
|------|------|------|-----|----|-------|--------|--------|------|------|
| ATOM | 1190 | HB3  | ALA | 77 | 3.337 | 0.127  | 7.158  | 1.00 | 0.00 |
| ATOM | 1191 | C    | ALA | 77 | 4.661 | 0.278  | 3.980  | 1.00 | 0.00 |
| ATOM | 1192 | O    | ALA | 77 | 5.119 | -0.609 | 3.286  | 1.00 | 0.00 |
| ATOM | 1193 | N    | LEU | 78 | 4.111 | 1.335  | 3.450  | 1.00 | 0.00 |
| ATOM | 1194 | H    | LEU | 78 | 3.729 | 2.078  | 4.017  | 1.00 | 0.00 |
| ATOM | 1195 | CA   | LEU | 78 | 4.039 | 1.469  | 1.969  | 1.00 | 0.00 |
| ATOM | 1196 | HA   | LEU | 78 | 3.393 | 0.696  | 1.552  | 1.00 | 0.00 |
| ATOM | 1197 | CB   | LEU | 78 | 3.463 | 2.838  | 1.603  | 1.00 | 0.00 |
| ATOM | 1198 | HB2  | LEU | 78 | 2.505 | 2.975  | 2.104  | 1.00 | 0.00 |
| ATOM | 1199 | HB3  | LEU | 78 | 4.153 | 3.620  | 1.920  | 1.00 | 0.00 |
| ATOM | 1200 | CG   | LEU | 78 | 3.263 | 2.918  | 0.090  | 1.00 | 0.00 |
| ATOM | 1201 | HG   | LEU | 78 | 4.173 | 2.593  | -0.415 | 1.00 | 0.00 |
| ATOM | 1202 | CD1  | LEU | 78 | 2.101 | 2.011  | -0.320 | 1.00 | 0.00 |
| ATOM | 1203 | HD11 | LEU | 78 | 1.191 | 2.335  | 0.184  | 1.00 | 0.00 |
| ATOM | 1204 | HD12 | LEU | 78 | 1.958 | 2.068  | -1.399 | 1.00 | 0.00 |
| ATOM | 1205 | HD13 | LEU | 78 | 2.325 | 0.982  | -0.037 | 1.00 | 0.00 |
| ATOM | 1206 | CD2  | LEU | 78 | 2.948 | 4.361  | -0.309 | 1.00 | 0.00 |
| ATOM | 1207 | HD21 | LEU | 78 | 3.776 | 5.007  | -0.018 | 1.00 | 0.00 |
| ATOM | 1208 | HD22 | LEU | 78 | 2.806 | 4.417  | -1.388 | 1.00 | 0.00 |
| ATOM | 1209 | HD23 | LEU | 78 | 2.038 | 4.687  | 0.195  | 1.00 | 0.00 |
| ATOM | 1210 | C    | LEU | 78 | 5.449 | 1.336  | 1.393  | 1.00 | 0.00 |
| ATOM | 1211 | O    | LEU | 78 | 5.672 | 0.636  | 0.426  | 1.00 | 0.00 |



|      |      |      |     |    |        |        |       |      |      |
|------|------|------|-----|----|--------|--------|-------|------|------|
| ATOM | 1212 | N    | GLN | 79 | 6.403  | 2.001  | 1.986 | 1.00 | 0.00 |
| ATOM | 1213 | H    | GLN | 79 | 6.223  | 2.584  | 2.791 | 1.00 | 0.00 |
| ATOM | 1214 | CA   | GLN | 79 | 7.799  | 1.910  | 1.479 | 1.00 | 0.00 |
| ATOM | 1215 | HA   | GLN | 79 | 7.870  | 2.356  | 0.487 | 1.00 | 0.00 |
| ATOM | 1216 | CB   | GLN | 79 | 8.739  | 2.665  | 2.423 | 1.00 | 0.00 |
| ATOM | 1217 | HB2  | GLN | 79 | 8.610  | 2.292  | 3.439 | 1.00 | 0.00 |
| ATOM | 1218 | HB3  | GLN | 79 | 9.771  | 2.511  | 2.108 | 1.00 | 0.00 |
| ATOM | 1219 | CG   | GLN | 79 | 8.411  | 4.159  | 2.382 | 1.00 | 0.00 |
| ATOM | 1220 | HG2  | GLN | 79 | 8.582  | 4.555  | 1.381 | 1.00 | 0.00 |
| ATOM | 1221 | HG3  | GLN | 79 | 7.373  | 4.327  | 2.666 | 1.00 | 0.00 |
| ATOM | 1222 | CD   | GLN | 79 | 9.315  | 4.906  | 3.365 | 1.00 | 0.00 |
| ATOM | 1223 | OE1  | GLN | 79 | 9.538  | 6.180  | 3.189 | 1.00 | 0.00 |
| ATOM | 1224 | NE2  | GLN | 79 | 9.825  | 4.324  | 4.302 | 1.00 | 0.00 |
| ATOM | 1225 | HE21 | GLN | 79 | 10.420 | 4.829  | 4.943 | 1.00 | 0.00 |
| ATOM | 1226 | HE22 | GLN | 79 | 9.652  | 3.337  | 4.435 | 1.00 | 0.00 |
| ATOM | 1227 | C    | GLN | 79 | 8.214  | 0.442  | 1.413 | 1.00 | 0.00 |
| ATOM | 1228 | O    | GLN | 79 | 8.778  | -0.012 | 0.438 | 1.00 | 0.00 |
| ATOM | 1229 | N    | GLN | 80 | 7.931  | -0.308 | 2.442 | 1.00 | 0.00 |
| ATOM | 1230 | H    | GLN | 80 | 7.459  | 0.059  | 3.255 | 1.00 | 0.00 |
| ATOM | 1231 | CA   | GLN | 80 | 8.304  | -1.750 | 2.434 | 1.00 | 0.00 |
| ATOM | 1232 | HA   | GLN | 80 | 9.389  | -1.859 | 2.415 | 1.00 | 0.00 |
| ATOM | 1233 | CB   | GLN | 80 | 7.767  | -2.426 | 3.697 | 1.00 | 0.00 |

|      |      |      |     |    |        |        |        |      |      |
|------|------|------|-----|----|--------|--------|--------|------|------|
| ATOM | 1234 | HB2  | GLN | 80 | 8.091  | -1.867 | 4.575  | 1.00 | 0.00 |
| ATOM | 1235 | HB3  | GLN | 80 | 6.678  | -2.449 | 3.663  | 1.00 | 0.00 |
| ATOM | 1236 | CG   | GLN | 80 | 8.304  | -3.856 | 3.777  | 1.00 | 0.00 |
| ATOM | 1237 | HG2  | GLN | 80 | 7.844  | -4.386 | 4.611  | 1.00 | 0.00 |
| ATOM | 1238 | HG3  | GLN | 80 | 8.099  | -4.391 | 2.850  | 1.00 | 0.00 |
| ATOM | 1239 | CD   | GLN | 80 | 9.818  | -3.821 | 3.996  | 1.00 | 0.00 |
| ATOM | 1240 | OE1  | GLN | 80 | 10.305 | -3.094 | 4.839  | 1.00 | 0.00 |
| ATOM | 1241 | NE2  | GLN | 80 | 10.588 | -4.581 | 3.266  | 1.00 | 0.00 |
| ATOM | 1242 | HE21 | GLN | 80 | 11.588 | -4.564 | 3.405  | 1.00 | 0.00 |
| ATOM | 1243 | HE22 | GLN | 80 | 10.180 | -5.184 | 2.565  | 1.00 | 0.00 |
| ATOM | 1244 | C    | GLN | 80 | 7.694  | -2.417 | 1.200  | 1.00 | 0.00 |
| ATOM | 1245 | O    | GLN | 80 | 8.359  | -3.136 | 0.480  | 1.00 | 0.00 |
| ATOM | 1246 | N    | ILE | 81 | 6.437  | -2.178 | 0.947  | 1.00 | 0.00 |
| ATOM | 1247 | H    | ILE | 81 | 5.879  | -1.580 | 1.539  | 1.00 | 0.00 |
| ATOM | 1248 | CA   | ILE | 81 | 5.790  | -2.793 | -0.245 | 1.00 | 0.00 |
| ATOM | 1249 | HA   | ILE | 81 | 5.659  | -3.862 | -0.077 | 1.00 | 0.00 |
| ATOM | 1250 | CB   | ILE | 81 | 4.425  | -2.142 | -0.475 | 1.00 | 0.00 |
| ATOM | 1251 | HB   | ILE | 81 | 4.549  | -1.064 | -0.571 | 1.00 | 0.00 |
| ATOM | 1252 | CG2  | ILE | 81 | 3.802  | -2.699 | -1.756 | 1.00 | 0.00 |
| ATOM | 1253 | HG21 | ILE | 81 | 3.678  | -3.778 | -1.661 | 1.00 | 0.00 |
| ATOM | 1254 | HG22 | ILE | 81 | 2.830  | -2.235 | -1.919 | 1.00 | 0.00 |
| ATOM | 1255 | HG23 | ILE | 81 | 4.454  | -2.483 | -2.602 | 1.00 | 0.00 |

|      |      |      |     |    |       |        |        |      |      |
|------|------|------|-----|----|-------|--------|--------|------|------|
| ATOM | 1256 | CG1  | ILE | 81 | 3.506 | -2.446 | 0.710  | 1.00 | 0.00 |
| ATOM | 1257 | HG12 | ILE | 81 | 3.464 | -3.524 | 0.869  | 1.00 | 0.00 |
| ATOM | 1258 | HG13 | ILE | 81 | 3.896 | -1.962 | 1.605  | 1.00 | 0.00 |
| ATOM | 1259 | CD1  | ILE | 81 | 2.100 | -1.918 | 0.416  | 1.00 | 0.00 |
| ATOM | 1260 | HD11 | ILE | 81 | 1.710 | -2.402 | -0.479 | 1.00 | 0.00 |
| ATOM | 1261 | HD12 | ILE | 81 | 1.446 | -2.135 | 1.260  | 1.00 | 0.00 |
| ATOM | 1262 | HD13 | ILE | 81 | 2.142 | -0.841 | 0.257  | 1.00 | 0.00 |
| ATOM | 1263 | C    | ILE | 81 | 6.680 | -2.566 | -1.467 | 1.00 | 0.00 |
| ATOM | 1264 | O    | ILE | 81 | 7.172 | -3.499 | -2.072 | 1.00 | 0.00 |
| ATOM | 1265 | N    | MET | 82 | 6.897 | -1.332 | -1.832 | 1.00 | 0.00 |
| ATOM | 1266 | H    | MET | 82 | 6.493 | -0.553 | -1.333 | 1.00 | 0.00 |
| ATOM | 1267 | CA   | MET | 82 | 7.761 | -1.045 | -3.010 | 1.00 | 0.00 |
| ATOM | 1268 | HA   | MET | 82 | 7.231 | -1.275 | -3.934 | 1.00 | 0.00 |
| ATOM | 1269 | CB   | MET | 82 | 8.135 | 0.439  | -3.017 | 1.00 | 0.00 |
| ATOM | 1270 | HB2  | MET | 82 | 8.790 | 0.653  | -2.172 | 1.00 | 0.00 |
| ATOM | 1271 | HB3  | MET | 82 | 8.652 | 0.679  | -3.946 | 1.00 | 0.00 |
| ATOM | 1272 | CG   | MET | 82 | 6.866 | 1.286  | -2.906 | 1.00 | 0.00 |
| ATOM | 1273 | HG2  | MET | 82 | 6.423 | 1.160  | -1.918 | 1.00 | 0.00 |
| ATOM | 1274 | HG3  | MET | 82 | 7.109 | 2.336  | -3.064 | 1.00 | 0.00 |
| ATOM | 1275 | SD   | MET | 82 | 5.677 | 0.755  | -4.163 | 1.00 | 0.00 |
| ATOM | 1276 | CE   | MET | 82 | 6.662 | 1.211  | -5.612 | 1.00 | 0.00 |
| ATOM | 1277 | HE1  | MET | 82 | 7.603 | 0.660  | -5.601 | 1.00 | 0.00 |

|      |      |         |    |        |        |        |      |      |
|------|------|---------|----|--------|--------|--------|------|------|
| ATOM | 1278 | HE2 MET | 82 | 6.110  | 0.966  | -6.519 | 1.00 | 0.00 |
| ATOM | 1279 | HE3 MET | 82 | 6.868  | 2.281  | -5.590 | 1.00 | 0.00 |
| ATOM | 1280 | C MET   | 82 | 9.031  | -1.890 | -2.924 | 1.00 | 0.00 |
| ATOM | 1281 | O MET   | 82 | 9.392  | -2.585 | -3.851 | 1.00 | 0.00 |
| ATOM | 1282 | N GLU   | 83 | 9.707  | -1.841 | -1.812 | 1.00 | 0.00 |
| ATOM | 1283 | H GLU   | 83 | 9.411  | -1.269 | -1.035 | 1.00 | 0.00 |
| ATOM | 1284 | CA GLU  | 83 | 10.952 | -2.644 | -1.663 | 1.00 | 0.00 |
| ATOM | 1285 | HA GLU  | 83 | 11.631 | -2.448 | -2.493 | 1.00 | 0.00 |
| ATOM | 1286 | CB GLU  | 83 | 11.653 | -2.261 | -0.357 | 1.00 | 0.00 |
| ATOM | 1287 | HB2 GLU | 83 | 10.960 | -2.379 | 0.476  | 1.00 | 0.00 |
| ATOM | 1288 | HB3 GLU | 83 | 12.517 | -2.908 | -0.204 | 1.00 | 0.00 |
| ATOM | 1289 | CG GLU  | 83 | 12.114 | -0.804 | -0.435 | 1.00 | 0.00 |
| ATOM | 1290 | HG2 GLU | 83 | 12.745 | -0.668 | -1.314 | 1.00 | 0.00 |
| ATOM | 1291 | HG3 GLU | 83 | 11.244 | -0.152 | -0.508 | 1.00 | 0.00 |
| ATOM | 1292 | CD GLU  | 83 | 12.910 | -0.453 | 0.823  | 1.00 | 0.00 |
| ATOM | 1293 | OE1 GLU | 83 | 12.978 | -1.286 | 1.710  | 1.00 | 0.00 |
| ATOM | 1294 | OE2 GLU | 83 | 13.440 | 0.645  | 0.877  | 1.00 | 0.00 |
| ATOM | 1295 | C GLU   | 83 | 10.592 | -4.130 | -1.634 | 1.00 | 0.00 |
| ATOM | 1296 | O GLU   | 83 | 11.440 | -4.988 | -1.776 | 1.00 | 0.00 |
| ATOM | 1297 | N ASN   | 84 | 9.337  | -4.437 | -1.455 | 1.00 | 0.00 |
| ATOM | 1298 | H ASN   | 84 | 8.629  | -3.728 | -1.336 | 1.00 | 0.00 |
| ATOM | 1299 | CA ASN  | 84 | 8.918  | -5.865 | -1.421 | 1.00 | 0.00 |

|      |      |      |     |    |       |        |        |      |      |
|------|------|------|-----|----|-------|--------|--------|------|------|
| ATOM | 1300 | HA   | ASN | 84 | 9.656 | -6.463 | -0.885 | 1.00 | 0.00 |
| ATOM | 1301 | CB   | ASN | 84 | 7.573 | -5.987 | -0.701 | 1.00 | 0.00 |
| ATOM | 1302 | HB2  | ASN | 84 | 7.616 | -5.488 | 0.267  | 1.00 | 0.00 |
| ATOM | 1303 | HB3  | ASN | 84 | 6.780 | -5.544 | -1.303 | 1.00 | 0.00 |
| ATOM | 1304 | CG   | ASN | 84 | 7.248 | -7.464 | -0.475 | 1.00 | 0.00 |
| ATOM | 1305 | OD1  | ASN | 84 | 7.869 | -8.118 | 0.339  | 1.00 | 0.00 |
| ATOM | 1306 | ND2  | ASN | 84 | 6.293 | -8.023 | -1.167 | 1.00 | 0.00 |
| ATOM | 1307 | HD21 | ASN | 84 | 6.073 | -8.999 | -1.023 | 1.00 | 0.00 |
| ATOM | 1308 | HD22 | ASN | 84 | 5.778 | -7.478 | -1.844 | 1.00 | 0.00 |
| ATOM | 1309 | C    | ASN | 84 | 8.781 | -6.388 | -2.852 | 1.00 | 0.00 |
| ATOM | 1310 | O    | ASN | 84 | 8.830 | -7.578 | -3.094 | 1.00 | 0.00 |
| ATOM | 1311 | N    | GLN | 85 | 8.608 | -5.510 | -3.803 | 1.00 | 0.00 |
| ATOM | 1312 | H    | GLN | 85 | 8.563 | -4.519 | -3.613 | 1.00 | 0.00 |
| ATOM | 1313 | CA   | GLN | 85 | 8.470 | -5.966 | -5.215 | 1.00 | 0.00 |
| ATOM | 1314 | HA   | GLN | 85 | 9.276 | -6.654 | -5.472 | 1.00 | 0.00 |
| ATOM | 1315 | CB   | GLN | 85 | 7.134 | -6.693 | -5.387 | 1.00 | 0.00 |
| ATOM | 1316 | HB2  | GLN | 85 | 7.014 | -7.428 | -4.591 | 1.00 | 0.00 |
| ATOM | 1317 | HB3  | GLN | 85 | 6.318 | -5.972 | -5.341 | 1.00 | 0.00 |
| ATOM | 1318 | CG   | GLN | 85 | 7.111 | -7.402 | -6.743 | 1.00 | 0.00 |
| ATOM | 1319 | HG2  | GLN | 85 | 7.217 | -6.678 | -7.551 | 1.00 | 0.00 |
| ATOM | 1320 | HG3  | GLN | 85 | 7.919 | -8.132 | -6.803 | 1.00 | 0.00 |
| ATOM | 1321 | CD   | GLN | 85 | 5.778 | -8.133 | -6.913 | 1.00 | 0.00 |

|      |      |      |     |    |        |        |        |      |      |
|------|------|------|-----|----|--------|--------|--------|------|------|
| ATOM | 1322 | OE1  | GLN | 85 | 5.076  | -8.373 | -5.951 | 1.00 | 0.00 |
| ATOM | 1323 | NE2  | GLN | 85 | 5.397  | -8.500 | -8.106 | 1.00 | 0.00 |
| ATOM | 1324 | HE21 | GLN | 85 | 4.518  | -8.983 | -8.226 | 1.00 | 0.00 |
| ATOM | 1325 | HE22 | GLN | 85 | 5.983  | -8.300 | -8.904 | 1.00 | 0.00 |
| ATOM | 1326 | C    | GLN | 85 | 8.516  | -4.759 | -6.158 | 1.00 | 0.00 |
| ATOM | 1327 | O    | GLN | 85 | 7.698  | -4.624 | -7.045 | 1.00 | 0.00 |
| ATOM | 1328 | N    | CYX | 86 | 9.470  | -3.884 | -5.979 | 1.00 | 0.00 |
| ATOM | 1329 | H    | CYX | 86 | 10.157 | -3.986 | -5.245 | 1.00 | 0.00 |
| ATOM | 1330 | CA   | CYX | 86 | 9.563  | -2.695 | -6.875 | 1.00 | 0.00 |
| ATOM | 1331 | HA   | CYX | 86 | 8.581  | -2.452 | -7.281 | 1.00 | 0.00 |
| ATOM | 1332 | CB   | CYX | 86 | 10.076 | -1.491 | -6.082 | 1.00 | 0.00 |
| ATOM | 1333 | HB2  | CYX | 86 | 10.280 | -0.666 | -6.765 | 1.00 | 0.00 |
| ATOM | 1334 | HB3  | CYX | 86 | 9.322  | -1.185 | -5.358 | 1.00 | 0.00 |
| ATOM | 1335 | SG   | CYX | 86 | 11.628 | -1.925 | -5.258 | 1.00 | 0.00 |
| ATOM | 1336 | C    | CYX | 86 | 10.529 | -2.997 | -8.021 | 1.00 | 0.00 |
| ATOM | 1337 | O    | CYX | 86 | 10.642 | -2.242 | -8.966 | 1.00 | 0.00 |
| ATOM | 1338 | N    | ASP | 87 | 11.231 | -4.096 | -7.944 | 1.00 | 0.00 |
| ATOM | 1339 | H    | ASP | 87 | 11.144 | -4.728 | -7.161 | 1.00 | 0.00 |
| ATOM | 1340 | CA   | ASP | 87 | 12.190 | -4.445 | -9.029 | 1.00 | 0.00 |
| ATOM | 1341 | HA   | ASP | 87 | 13.078 | -3.815 | -8.967 | 1.00 | 0.00 |
| ATOM | 1342 | CB   | ASP | 87 | 12.617 | -5.907 | -8.880 | 1.00 | 0.00 |
| ATOM | 1343 | HB2  | ASP | 87 | 11.746 | -6.519 | -8.644 | 1.00 | 0.00 |

|      |      |     |     |    |        |        |         |      |      |
|------|------|-----|-----|----|--------|--------|---------|------|------|
| ATOM | 1344 | HB3 | ASP | 87 | 13.061 | -6.253 | -9.814  | 1.00 | 0.00 |
| ATOM | 1345 | CG  | ASP | 87 | 13.644 | -6.027 | -7.752  | 1.00 | 0.00 |
| ATOM | 1346 | OD1 | ASP | 87 | 14.077 | -4.998 | -7.259  | 1.00 | 0.00 |
| ATOM | 1347 | OD2 | ASP | 87 | 13.980 | -7.145 | -7.400  | 1.00 | 0.00 |
| ATOM | 1348 | C   | ASP | 87 | 11.518 | -4.247 | -10.389 | 1.00 | 0.00 |
| ATOM | 1349 | O   | ASP | 87 | 12.076 | -3.647 | -11.287 | 1.00 | 0.00 |
| ATOM | 1350 | N   | ARG | 88 | 10.324 | -4.749 | -10.550 | 1.00 | 0.00 |
| ATOM | 1351 | H   | ARG | 88 | 9.855  | -5.250 | -9.809  | 1.00 | 0.00 |
| ATOM | 1352 | CA  | ARG | 88 | 9.619  | -4.591 | -11.853 | 1.00 | 0.00 |
| ATOM | 1353 | HA  | ARG | 88 | 10.222 | -5.005 | -12.662 | 1.00 | 0.00 |
| ATOM | 1354 | CB  | ARG | 88 | 8.285  | -5.340 | -11.805 | 1.00 | 0.00 |
| ATOM | 1355 | HB2 | ARG | 88 | 7.700  | -4.987 | -10.956 | 1.00 | 0.00 |
| ATOM | 1356 | HB3 | ARG | 88 | 7.733  | -5.159 | -12.727 | 1.00 | 0.00 |
| ATOM | 1357 | CG  | ARG | 88 | 8.547  | -6.840 | -11.654 | 1.00 | 0.00 |
| ATOM | 1358 | HG2 | ARG | 88 | 9.137  | -7.193 | -12.500 | 1.00 | 0.00 |
| ATOM | 1359 | HG3 | ARG | 88 | 9.094  | -7.022 | -10.729 | 1.00 | 0.00 |
| ATOM | 1360 | CD  | ARG | 88 | 7.215  | -7.590 | -11.614 | 1.00 | 0.00 |
| ATOM | 1361 | HD2 | ARG | 88 | 6.554  | -7.145 | -10.871 | 1.00 | 0.00 |
| ATOM | 1362 | HD3 | ARG | 88 | 6.735  | -7.558 | -12.592 | 1.00 | 0.00 |
| ATOM | 1363 | NE  | ARG | 88 | 7.455  | -9.013 | -11.247 | 1.00 | 0.00 |
| ATOM | 1364 | HE  | ARG | 88 | 7.167  | -9.384 | -10.352 | 1.00 | 0.00 |
| ATOM | 1365 | CZ  | ARG | 88 | 8.049  | -9.814 | -12.091 | 1.00 | 0.00 |

|      |      |      |     |    |        |         |         |      |      |
|------|------|------|-----|----|--------|---------|---------|------|------|
| ATOM | 1366 | NH1  | ARG | 88 | 7.342  | -10.625 | -12.828 | 1.00 | 0.00 |
| ATOM | 1367 | HH11 | ARG | 88 | 6.336  | -10.632 | -12.744 | 1.00 | 0.00 |
| ATOM | 1368 | HH12 | ARG | 88 | 7.804  | -11.243 | -13.480 | 1.00 | 0.00 |
| ATOM | 1369 | NH2  | ARG | 88 | 9.350  | -9.801  | -12.197 | 1.00 | 0.00 |
| ATOM | 1370 | HH21 | ARG | 88 | 9.894  | -9.171  | -11.625 | 1.00 | 0.00 |
| ATOM | 1371 | HH22 | ARG | 88 | 9.807  | -10.422 | -12.850 | 1.00 | 0.00 |
| ATOM | 1372 | C    | ARG | 88 | 9.360  | -3.106  | -12.121 | 1.00 | 0.00 |
| ATOM | 1373 | O    | ARG | 88 | 9.004  | -2.717  | -13.215 | 1.00 | 0.00 |
| ATOM | 1374 | N    | LEU | 89 | 9.539  | -2.275  | -11.132 | 1.00 | 0.00 |
| ATOM | 1375 | H    | LEU | 89 | 9.835  | -2.591  | -10.219 | 1.00 | 0.00 |
| ATOM | 1376 | CA   | LEU | 89 | 9.304  | -0.817  | -11.334 | 1.00 | 0.00 |
| ATOM | 1377 | HA   | LEU | 89 | 8.277  | -0.641  | -11.652 | 1.00 | 0.00 |
| ATOM | 1378 | CB   | LEU | 89 | 9.544  | -0.072  | -10.019 | 1.00 | 0.00 |
| ATOM | 1379 | HB2  | LEU | 89 | 9.057  | -0.606  | -9.203  | 1.00 | 0.00 |
| ATOM | 1380 | HB3  | LEU | 89 | 10.615 | -0.013  | -9.826  | 1.00 | 0.00 |
| ATOM | 1381 | CG   | LEU | 89 | 8.966  | 1.340   | -10.121 | 1.00 | 0.00 |
| ATOM | 1382 | HG   | LEU | 89 | 9.380  | 1.840   | -10.997 | 1.00 | 0.00 |
| ATOM | 1383 | CD1  | LEU | 89 | 7.444  | 1.259   | -10.252 | 1.00 | 0.00 |
| ATOM | 1384 | HD11 | LEU | 89 | 7.030  | 0.759   | -9.377  | 1.00 | 0.00 |
| ATOM | 1385 | HD12 | LEU | 89 | 7.031  | 2.265   | -10.325 | 1.00 | 0.00 |
| ATOM | 1386 | HD13 | LEU | 89 | 7.186  | 0.695   | -11.148 | 1.00 | 0.00 |
| ATOM | 1387 | CD2  | LEU | 89 | 9.325  | 2.133   | -8.864  | 1.00 | 0.00 |



|      |      |      |     |    |        |        |         |      |      |
|------|------|------|-----|----|--------|--------|---------|------|------|
| ATOM | 1388 | HD21 | LEU | 89 | 10.409 | 2.191  | -8.768  | 1.00 | 0.00 |
| ATOM | 1389 | HD22 | LEU | 89 | 8.913  | 3.139  | -8.938  | 1.00 | 0.00 |
| ATOM | 1390 | HD23 | LEU | 89 | 8.910  | 1.634  | -7.988  | 1.00 | 0.00 |
| ATOM | 1391 | C    | LEU | 89 | 10.264 | -0.288 | -12.402 | 1.00 | 0.00 |
| ATOM | 1392 | O    | LEU | 89 | 10.081 | 0.787  | -12.937 | 1.00 | 0.00 |
| ATOM | 1393 | N    | GLN | 90 | 11.287 | -1.036 | -12.715 | 1.00 | 0.00 |
| ATOM | 1394 | H    | GLN | 90 | 11.446 | -1.932 | -12.275 | 1.00 | 0.00 |
| ATOM | 1395 | CA   | GLN | 90 | 12.257 | -0.575 | -13.748 | 1.00 | 0.00 |
| ATOM | 1396 | HA   | GLN | 90 | 12.900 | 0.206  | -13.342 | 1.00 | 0.00 |
| ATOM | 1397 | CB   | GLN | 90 | 13.133 | -1.751 | -14.185 | 1.00 | 0.00 |
| ATOM | 1398 | HB2  | GLN | 90 | 12.505 | -2.620 | -14.382 | 1.00 | 0.00 |
| ATOM | 1399 | HB3  | GLN | 90 | 13.676 | -1.484 | -15.092 | 1.00 | 0.00 |
| ATOM | 1400 | CG   | GLN | 90 | 14.131 | -2.085 | -13.073 | 1.00 | 0.00 |
| ATOM | 1401 | HG2  | GLN | 90 | 14.703 | -1.198 | -12.800 | 1.00 | 0.00 |
| ATOM | 1402 | HG3  | GLN | 90 | 13.609 | -2.465 | -12.195 | 1.00 | 0.00 |
| ATOM | 1403 | CD   | GLN | 90 | 15.102 | -3.159 | -13.567 | 1.00 | 0.00 |
| ATOM | 1404 | OE1  | GLN | 90 | 14.877 | -3.773 | -14.591 | 1.00 | 0.00 |
| ATOM | 1405 | NE2  | GLN | 90 | 16.179 | -3.415 | -12.876 | 1.00 | 0.00 |
| ATOM | 1406 | HE21 | GLN | 90 | 16.825 | -4.123 | -13.196 | 1.00 | 0.00 |
| ATOM | 1407 | HE22 | GLN | 90 | 16.362 | -2.905 | -12.024 | 1.00 | 0.00 |
| ATOM | 1408 | C    | GLN | 90 | 11.495 | -0.032 | -14.957 | 1.00 | 0.00 |
| ATOM | 1409 | O    | GLN | 90 | 11.993 | 0.789  | -15.701 | 1.00 | 0.00 |

|      |      |     |     |    |        |        |         |      |      |
|------|------|-----|-----|----|--------|--------|---------|------|------|
| ATOM | 1410 | N   | ASP | 91 | 10.287 | -0.484 | -15.161 | 1.00 | 0.00 |
| ATOM | 1411 | H   | ASP | 91 | 9.866  | -1.166 | -14.546 | 1.00 | 0.00 |
| ATOM | 1412 | CA  | ASP | 91 | 9.493  | 0.005  | -16.322 | 1.00 | 0.00 |
| ATOM | 1413 | HA  | ASP | 91 | 10.052 | -0.133 | -17.248 | 1.00 | 0.00 |
| ATOM | 1414 | CB  | ASP | 91 | 8.188  | -0.786 | -16.417 | 1.00 | 0.00 |
| ATOM | 1415 | HB2 | ASP | 91 | 7.655  | -0.723 | -15.468 | 1.00 | 0.00 |
| ATOM | 1416 | HB3 | ASP | 91 | 7.567  | -0.370 | -17.210 | 1.00 | 0.00 |
| ATOM | 1417 | CG  | ASP | 91 | 8.500  | -2.250 | -16.729 | 1.00 | 0.00 |
| ATOM | 1418 | OD1 | ASP | 91 | 9.630  | -2.529 | -17.096 | 1.00 | 0.00 |
| ATOM | 1419 | OD2 | ASP | 91 | 7.605  | -3.069 | -16.597 | 1.00 | 0.00 |
| ATOM | 1420 | C   | ASP | 91 | 9.176  | 1.490  | -16.133 | 1.00 | 0.00 |
| ATOM | 1421 | O   | ASP | 91 | 8.906  | 1.944  | -15.038 | 1.00 | 0.00 |
| ATOM | 1422 | N   | ARG | 92 | 9.209  | 2.253  | -17.192 | 1.00 | 0.00 |
| ATOM | 1423 | H   | ARG | 92 | 9.435  | 1.884  | -18.105 | 1.00 | 0.00 |
| ATOM | 1424 | CA  | ARG | 92 | 8.910  | 3.708  | -17.072 | 1.00 | 0.00 |
| ATOM | 1425 | HA  | ARG | 92 | 9.486  | 4.145  | -16.256 | 1.00 | 0.00 |
| ATOM | 1426 | CB  | ARG | 92 | 9.289  | 4.417  | -18.373 | 1.00 | 0.00 |
| ATOM | 1427 | HB2 | ARG | 92 | 10.365 | 4.338  | -18.529 | 1.00 | 0.00 |
| ATOM | 1428 | HB3 | ARG | 92 | 8.767  | 3.948  | -19.207 | 1.00 | 0.00 |
| ATOM | 1429 | CG  | ARG | 92 | 8.893  | 5.891  | -18.287 | 1.00 | 0.00 |
| ATOM | 1430 | HG2 | ARG | 92 | 7.850  | 5.969  | -17.981 | 1.00 | 0.00 |
| ATOM | 1431 | HG3 | ARG | 92 | 9.525  | 6.395  | -17.556 | 1.00 | 0.00 |

|      |      |      |     |    |        |       |         |      |      |
|------|------|------|-----|----|--------|-------|---------|------|------|
| ATOM | 1432 | CD   | ARG | 92 | 9.073  | 6.549 | -19.656 | 1.00 | 0.00 |
| ATOM | 1433 | HD2  | ARG | 92 | 8.361  | 6.135 | -20.370 | 1.00 | 0.00 |
| ATOM | 1434 | HD3  | ARG | 92 | 8.925  | 7.626 | -19.579 | 1.00 | 0.00 |
| ATOM | 1435 | NE   | ARG | 92 | 10.453 | 6.291 | -20.154 | 1.00 | 0.00 |
| ATOM | 1436 | HE   | ARG | 92 | 11.051 | 5.602 | -19.719 | 1.00 | 0.00 |
| ATOM | 1437 | CZ   | ARG | 92 | 10.914 | 6.959 | -21.175 | 1.00 | 0.00 |
| ATOM | 1438 | NH1  | ARG | 92 | 10.649 | 8.231 | -21.295 | 1.00 | 0.00 |
| ATOM | 1439 | HH11 | ARG | 92 | 10.087 | 8.694 | -20.596 | 1.00 | 0.00 |
| ATOM | 1440 | HH12 | ARG | 92 | 11.008 | 8.745 | -22.087 | 1.00 | 0.00 |
| ATOM | 1441 | NH2  | ARG | 92 | 11.642 | 6.356 | -22.075 | 1.00 | 0.00 |
| ATOM | 1442 | HH21 | ARG | 92 | 11.847 | 5.371 | -21.978 | 1.00 | 0.00 |
| ATOM | 1443 | HH22 | ARG | 92 | 11.998 | 6.876 | -22.864 | 1.00 | 0.00 |
| ATOM | 1444 | C    | ARG | 92 | 7.416  | 3.901 | -16.803 | 1.00 | 0.00 |
| ATOM | 1445 | O    | ARG | 92 | 6.983  | 4.951 | -16.370 | 1.00 | 0.00 |
| ATOM | 1446 | N    | GLN | 93 | 6.623  | 2.897 | -17.057 | 1.00 | 0.00 |
| ATOM | 1447 | H    | GLN | 93 | 6.975  | 2.021 | -17.418 | 1.00 | 0.00 |
| ATOM | 1448 | CA   | GLN | 93 | 5.159  | 3.024 | -16.817 | 1.00 | 0.00 |
| ATOM | 1449 | HA   | GLN | 93 | 4.802  | 3.995 | -17.157 | 1.00 | 0.00 |
| ATOM | 1450 | CB   | GLN | 93 | 4.420  | 1.931 | -17.595 | 1.00 | 0.00 |
| ATOM | 1451 | HB2  | GLN | 93 | 4.780  | 1.910 | -18.624 | 1.00 | 0.00 |
| ATOM | 1452 | HB3  | GLN | 93 | 4.604  | 0.963 | -17.127 | 1.00 | 0.00 |
| ATOM | 1453 | CG   | GLN | 93 | 2.918  | 2.225 | -17.586 | 1.00 | 0.00 |

|      |      |      |     |    |       |        |         |      |      |
|------|------|------|-----|----|-------|--------|---------|------|------|
| ATOM | 1454 | HG2  | GLN | 93 | 2.520 | 2.135  | -16.575 | 1.00 | 0.00 |
| ATOM | 1455 | HG3  | GLN | 93 | 2.728 | 3.229  | -17.963 | 1.00 | 0.00 |
| ATOM | 1456 | CD   | GLN | 93 | 2.197 | 1.220  | -18.487 | 1.00 | 0.00 |
| ATOM | 1457 | OE1  | GLN | 93 | 2.826 | 0.482  | -19.219 | 1.00 | 0.00 |
| ATOM | 1458 | NE2  | GLN | 93 | 0.894 | 1.159  | -18.463 | 1.00 | 0.00 |
| ATOM | 1459 | HE21 | GLN | 93 | 0.412 | 0.498  | -19.055 | 1.00 | 0.00 |
| ATOM | 1460 | HE22 | GLN | 93 | 0.374 | 1.773  | -17.853 | 1.00 | 0.00 |
| ATOM | 1461 | C    | GLN | 93 | 4.868 | 2.872  | -15.322 | 1.00 | 0.00 |
| ATOM | 1462 | O    | GLN | 93 | 4.192 | 3.688  | -14.727 | 1.00 | 0.00 |
| ATOM | 1463 | N    | MET | 94 | 5.372 | 1.835  | -14.711 | 1.00 | 0.00 |
| ATOM | 1464 | H    | MET | 94 | 5.937 | 1.154  | -15.199 | 1.00 | 0.00 |
| ATOM | 1465 | CA   | MET | 94 | 5.122 | 1.632  | -13.256 | 1.00 | 0.00 |
| ATOM | 1466 | HA   | MET | 94 | 4.057 | 1.488  | -13.072 | 1.00 | 0.00 |
| ATOM | 1467 | CB   | MET | 94 | 5.872 | 0.389  | -12.776 | 1.00 | 0.00 |
| ATOM | 1468 | HB2  | MET | 94 | 6.901 | 0.424  | -13.136 | 1.00 | 0.00 |
| ATOM | 1469 | HB3  | MET | 94 | 5.870 | 0.362  | -11.686 | 1.00 | 0.00 |
| ATOM | 1470 | CG   | MET | 94 | 5.186 | -0.866 | -13.318 | 1.00 | 0.00 |
| ATOM | 1471 | HG2  | MET | 94 | 4.866 | -0.696 | -14.346 | 1.00 | 0.00 |
| ATOM | 1472 | HG3  | MET | 94 | 5.880 | -1.707 | -13.289 | 1.00 | 0.00 |
| ATOM | 1473 | SD   | MET | 94 | 3.740 | -1.252 | -12.300 | 1.00 | 0.00 |
| ATOM | 1474 | CE   | MET | 94 | 4.589 | -1.311 | -10.702 | 1.00 | 0.00 |
| ATOM | 1475 | HE1  | MET | 94 | 5.053 | -0.346 | -10.500 | 1.00 | 0.00 |

|      |      |      |     |    |        |        |         |      |      |
|------|------|------|-----|----|--------|--------|---------|------|------|
| ATOM | 1476 | HE2  | MET | 94 | 3.870  | -1.540 | -9.916  | 1.00 | 0.00 |
| ATOM | 1477 | HE3  | MET | 94 | 5.357  | -2.084 | -10.726 | 1.00 | 0.00 |
| ATOM | 1478 | C    | MET | 94 | 5.615  | 2.853  | -12.475 | 1.00 | 0.00 |
| ATOM | 1479 | O    | MET | 94 | 4.985  | 3.297  | -11.537 | 1.00 | 0.00 |
| ATOM | 1480 | N    | VAL | 95 | 6.743  | 3.393  | -12.851 | 1.00 | 0.00 |
| ATOM | 1481 | H    | VAL | 95 | 7.274  | 3.024  | -13.627 | 1.00 | 0.00 |
| ATOM | 1482 | CA   | VAL | 95 | 7.282  | 4.581  | -12.127 | 1.00 | 0.00 |
| ATOM | 1483 | HA   | VAL | 95 | 7.779  | 4.269  | -11.208 | 1.00 | 0.00 |
| ATOM | 1484 | CB   | VAL | 95 | 8.300  | 5.300  | -13.014 | 1.00 | 0.00 |
| ATOM | 1485 | HB   | VAL | 95 | 7.845  | 5.531  | -13.977 | 1.00 | 0.00 |
| ATOM | 1486 | CG1  | VAL | 95 | 8.742  | 6.597  | -12.335 | 1.00 | 0.00 |
| ATOM | 1487 | HG11 | VAL | 95 | 9.198  | 6.366  | -11.372 | 1.00 | 0.00 |
| ATOM | 1488 | HG12 | VAL | 95 | 9.468  | 7.109  | -12.967 | 1.00 | 0.00 |
| ATOM | 1489 | HG13 | VAL | 95 | 7.876  | 7.240  | -12.181 | 1.00 | 0.00 |
| ATOM | 1490 | CG2  | VAL | 95 | 9.517  | 4.397  | -13.228 | 1.00 | 0.00 |
| ATOM | 1491 | HG21 | VAL | 95 | 9.203  | 3.471  | -13.712 | 1.00 | 0.00 |
| ATOM | 1492 | HG22 | VAL | 95 | 10.243 | 4.908  | -13.860 | 1.00 | 0.00 |
| ATOM | 1493 | HG23 | VAL | 95 | 9.973  | 4.166  | -12.265 | 1.00 | 0.00 |
| ATOM | 1494 | C    | VAL | 95 | 6.140  | 5.540  | -11.780 | 1.00 | 0.00 |
| ATOM | 1495 | O    | VAL | 95 | 5.513  | 5.423  | -10.746 | 1.00 | 0.00 |
| ATOM | 1496 | N    | GLN | 96 | 5.868  | 6.488  | -12.633 | 1.00 | 0.00 |
| ATOM | 1497 | H    | GLN | 96 | 6.387  | 6.594  | -13.493 | 1.00 | 0.00 |

|      |      |      |     |    |       |        |         |      |      |
|------|------|------|-----|----|-------|--------|---------|------|------|
| ATOM | 1498 | CA   | GLN | 96 | 4.769 | 7.453  | -12.347 | 1.00 | 0.00 |
| ATOM | 1499 | HA   | GLN | 96 | 5.008 | 8.047  | -11.465 | 1.00 | 0.00 |
| ATOM | 1500 | CB   | GLN | 96 | 4.594 | 8.396  | -13.540 | 1.00 | 0.00 |
| ATOM | 1501 | HB2  | GLN | 96 | 4.310 | 7.819  | -14.420 | 1.00 | 0.00 |
| ATOM | 1502 | HB3  | GLN | 96 | 3.815 | 9.124  | -13.316 | 1.00 | 0.00 |
| ATOM | 1503 | CG   | GLN | 96 | 5.911 | 9.125  | -13.812 | 1.00 | 0.00 |
| ATOM | 1504 | HG2  | GLN | 96 | 6.248 | 9.649  | -12.917 | 1.00 | 0.00 |
| ATOM | 1505 | HG3  | GLN | 96 | 6.677 | 8.415  | -14.126 | 1.00 | 0.00 |
| ATOM | 1506 | CD   | GLN | 96 | 5.705 | 10.149 | -14.930 | 1.00 | 0.00 |
| ATOM | 1507 | OE1  | GLN | 96 | 4.985 | 11.114 | -14.762 | 1.00 | 0.00 |
| ATOM | 1508 | NE2  | GLN | 96 | 6.313 | 9.981  | -16.073 | 1.00 | 0.00 |
| ATOM | 1509 | HE21 | GLN | 96 | 6.182 | 10.653 | -16.815 | 1.00 | 0.00 |
| ATOM | 1510 | HE22 | GLN | 96 | 6.912 | 9.179  | -16.210 | 1.00 | 0.00 |
| ATOM | 1511 | C    | GLN | 96 | 3.468 | 6.691  | -12.103 | 1.00 | 0.00 |
| ATOM | 1512 | O    | GLN | 96 | 2.828 | 6.842  | -11.081 | 1.00 | 0.00 |
| ATOM | 1513 | N    | GLN | 97 | 3.072 | 5.874  | -13.035 | 1.00 | 0.00 |
| ATOM | 1514 | H    | GLN | 97 | 3.599 | 5.749  | -13.887 | 1.00 | 0.00 |
| ATOM | 1515 | CA   | GLN | 97 | 1.812 | 5.098  | -12.864 | 1.00 | 0.00 |
| ATOM | 1516 | HA   | GLN | 97 | 0.947 | 5.743  | -13.014 | 1.00 | 0.00 |
| ATOM | 1517 | CB   | GLN | 97 | 1.766 | 3.970  | -13.897 | 1.00 | 0.00 |
| ATOM | 1518 | HB2  | GLN | 97 | 2.092 | 4.349  | -14.866 | 1.00 | 0.00 |
| ATOM | 1519 | HB3  | GLN | 97 | 2.427 | 3.161  | -13.584 | 1.00 | 0.00 |

|      |      |      |     |    |        |       |         |      |      |
|------|------|------|-----|----|--------|-------|---------|------|------|
| ATOM | 1520 | CG   | GLN | 97 | 0.334  | 3.443 | -14.011 | 1.00 | 0.00 |
| ATOM | 1521 | HG2  | GLN | 97 | 0.298  | 2.584 | -14.682 | 1.00 | 0.00 |
| ATOM | 1522 | HG3  | GLN | 97 | -0.040 | 3.152 | -13.029 | 1.00 | 0.00 |
| ATOM | 1523 | CD   | GLN | 97 | -0.570 | 4.541 | -14.573 | 1.00 | 0.00 |
| ATOM | 1524 | OE1  | GLN | 97 | -0.448 | 4.917 | -15.722 | 1.00 | 0.00 |
| ATOM | 1525 | NE2  | GLN | 97 | -1.481 | 5.074 | -13.805 | 1.00 | 0.00 |
| ATOM | 1526 | HE21 | GLN | 97 | -2.082 | 5.799 | -14.169 | 1.00 | 0.00 |
| ATOM | 1527 | HE22 | GLN | 97 | -1.580 | 4.758 | -12.851 | 1.00 | 0.00 |
| ATOM | 1528 | C    | GLN | 97 | 1.761  | 4.506 | -11.454 | 1.00 | 0.00 |
| ATOM | 1529 | O    | GLN | 97 | 0.963  | 4.908 | -10.630 | 1.00 | 0.00 |
| ATOM | 1530 | N    | PHE | 98 | 2.608  | 3.555 | -11.168 | 1.00 | 0.00 |
| ATOM | 1531 | H    | PHE | 98 | 3.275  | 3.209 | -11.843 | 1.00 | 0.00 |
| ATOM | 1532 | CA   | PHE | 98 | 2.600  | 2.946 | -9.807  | 1.00 | 0.00 |
| ATOM | 1533 | HA   | PHE | 98 | 1.678  | 2.385 | -9.655  | 1.00 | 0.00 |
| ATOM | 1534 | CB   | PHE | 98 | 3.786  | 1.989 | -9.651  | 1.00 | 0.00 |
| ATOM | 1535 | HB2  | PHE | 98 | 3.833  | 1.259 | -10.460 | 1.00 | 0.00 |
| ATOM | 1536 | HB3  | PHE | 98 | 4.737  | 2.518 | -9.585  | 1.00 | 0.00 |
| ATOM | 1537 | CG   | PHE | 98 | 3.638  | 1.202 | -8.366  | 1.00 | 0.00 |
| ATOM | 1538 | CD1  | PHE | 98 | 2.438  | 1.250 | -7.641  | 1.00 | 0.00 |
| ATOM | 1539 | HD1  | PHE | 98 | 1.608  | 1.855 | -8.004  | 1.00 | 0.00 |
| ATOM | 1540 | CE1  | PHE | 98 | 2.307  | 0.522 | -6.454  | 1.00 | 0.00 |
| ATOM | 1541 | HE1  | PHE | 98 | 1.373  | 0.560 | -5.893  | 1.00 | 0.00 |

|      |      |     |     |    |       |        |        |      |      |
|------|------|-----|-----|----|-------|--------|--------|------|------|
| ATOM | 1542 | CZ  | PHE | 98 | 3.372 | -0.255 | -5.986 | 1.00 | 0.00 |
| ATOM | 1543 | HZ  | PHE | 98 | 3.269 | -0.822 | -5.060 | 1.00 | 0.00 |
| ATOM | 1544 | CE2 | PHE | 98 | 4.571 | -0.305 | -6.707 | 1.00 | 0.00 |
| ATOM | 1545 | HE2 | PHE | 98 | 5.401 | -0.911 | -6.343 | 1.00 | 0.00 |
| ATOM | 1546 | CD2 | PHE | 98 | 4.704 | 0.423  | -7.896 | 1.00 | 0.00 |
| ATOM | 1547 | HD2 | PHE | 98 | 5.638 | 0.384  | -8.457 | 1.00 | 0.00 |
| ATOM | 1548 | C   | PHE | 98 | 2.699 | 4.055  | -8.761 | 1.00 | 0.00 |
| ATOM | 1549 | O   | PHE | 98 | 2.069 | 4.003  | -7.724 | 1.00 | 0.00 |
| ATOM | 1550 | N   | LYS | 99 | 3.484 | 5.061  | -9.029 | 1.00 | 0.00 |
| ATOM | 1551 | H   | LYS | 99 | 4.010 | 5.109  | -9.890 | 1.00 | 0.00 |
| ATOM | 1552 | CA  | LYS | 99 | 3.621 | 6.178  | -8.054 | 1.00 | 0.00 |
| ATOM | 1553 | HA  | LYS | 99 | 3.915 | 5.792  | -7.078 | 1.00 | 0.00 |
| ATOM | 1554 | CB  | LYS | 99 | 4.696 | 7.152  | -8.538 | 1.00 | 0.00 |
| ATOM | 1555 | HB2 | LYS | 99 | 5.609 | 6.602  | -8.766 | 1.00 | 0.00 |
| ATOM | 1556 | HB3 | LYS | 99 | 4.347 | 7.662  | -9.436 | 1.00 | 0.00 |
| ATOM | 1557 | CG  | LYS | 99 | 4.981 | 8.183  | -7.443 | 1.00 | 0.00 |
| ATOM | 1558 | HG2 | LYS | 99 | 4.054 | 8.684  | -7.164 | 1.00 | 0.00 |
| ATOM | 1559 | HG3 | LYS | 99 | 5.400 | 7.681  | -6.570 | 1.00 | 0.00 |
| ATOM | 1560 | CD  | LYS | 99 | 5.981 | 9.216  | -7.966 | 1.00 | 0.00 |
| ATOM | 1561 | HD2 | LYS | 99 | 6.928 | 8.725  | -8.190 | 1.00 | 0.00 |
| ATOM | 1562 | HD3 | LYS | 99 | 5.588 | 9.676  | -8.872 | 1.00 | 0.00 |
| ATOM | 1563 | CE  | LYS | 99 | 6.204 | 10.293 | -6.902 | 1.00 | 0.00 |



|      |      |     |     |     |        |        |         |      |      |
|------|------|-----|-----|-----|--------|--------|---------|------|------|
| ATOM | 1564 | HE2 | LYS | 99  | 6.024  | 11.276 | -7.336  | 1.00 | 0.00 |
| ATOM | 1565 | HE3 | LYS | 99  | 5.517  | 10.131 | -6.071  | 1.00 | 0.00 |
| ATOM | 1566 | NZ  | LYS | 99  | 7.607  | 10.219 | -6.407  | 1.00 | 0.00 |
| ATOM | 1567 | HZ1 | LYS | 99  | 8.244  | 10.369 | -7.177  | 1.00 | 0.00 |
| ATOM | 1568 | HZ2 | LYS | 99  | 7.754  | 10.929 | -5.705  | 1.00 | 0.00 |
| ATOM | 1569 | HZ3 | LYS | 99  | 7.775  | 9.308  | -6.004  | 1.00 | 0.00 |
| ATOM | 1570 | C   | LYS | 99  | 2.283  | 6.910  | -7.939  | 1.00 | 0.00 |
| ATOM | 1571 | O   | LYS | 99  | 1.919  | 7.400  | -6.889  | 1.00 | 0.00 |
| ATOM | 1572 | N   | ARG | 100 | 1.546  | 6.981  | -9.012  | 1.00 | 0.00 |
| ATOM | 1573 | H   | ARG | 100 | 1.844  | 6.575  | -9.888  | 1.00 | 0.00 |
| ATOM | 1574 | CA  | ARG | 100 | 0.228  | 7.673  | -8.966  | 1.00 | 0.00 |
| ATOM | 1575 | HA  | ARG | 100 | 0.340  | 8.669  | -8.538  | 1.00 | 0.00 |
| ATOM | 1576 | CB  | ARG | 100 | -0.330 | 7.810  | -10.384 | 1.00 | 0.00 |
| ATOM | 1577 | HB2 | ARG | 100 | -0.148 | 6.889  | -10.938 | 1.00 | 0.00 |
| ATOM | 1578 | HB3 | ARG | 100 | -1.402 | 7.999  | -10.337 | 1.00 | 0.00 |
| ATOM | 1579 | CG  | ARG | 100 | 0.363  | 8.976  | -11.092 | 1.00 | 0.00 |
| ATOM | 1580 | HG2 | ARG | 100 | 0.216  | 9.889  | -10.516 | 1.00 | 0.00 |
| ATOM | 1581 | HG3 | ARG | 100 | 1.430  | 8.767  | -11.176 | 1.00 | 0.00 |
| ATOM | 1582 | CD  | ARG | 100 | -0.234 | 9.153  | -12.490 | 1.00 | 0.00 |
| ATOM | 1583 | HD2 | ARG | 100 | -0.327 | 8.186  | -12.986 | 1.00 | 0.00 |
| ATOM | 1584 | HD3 | ARG | 100 | -1.215 | 9.623  | -12.425 | 1.00 | 0.00 |
| ATOM | 1585 | NE  | ARG | 100 | 0.660  | 10.024 | -13.305 | 1.00 | 0.00 |

|      |      |      |     |     |        |        |         |      |      |
|------|------|------|-----|-----|--------|--------|---------|------|------|
| ATOM | 1586 | HE   | ARG | 100 | 1.566  | 9.705  | -13.618 | 1.00 | 0.00 |
| ATOM | 1587 | CZ   | ARG | 100 | 0.278  | 11.228 | -13.630 | 1.00 | 0.00 |
| ATOM | 1588 | NH1  | ARG | 100 | 0.904  | 12.265 | -13.144 | 1.00 | 0.00 |
| ATOM | 1589 | HH11 | ARG | 100 | 1.684  | 12.131 | -12.516 | 1.00 | 0.00 |
| ATOM | 1590 | HH12 | ARG | 100 | 0.606  | 13.195 | -13.398 | 1.00 | 0.00 |
| ATOM | 1591 | NH2  | ARG | 100 | -0.730 | 11.396 | -14.441 | 1.00 | 0.00 |
| ATOM | 1592 | HH21 | ARG | 100 | -1.212 | 10.591 | -14.816 | 1.00 | 0.00 |
| ATOM | 1593 | HH22 | ARG | 100 | -1.023 | 12.329 | -14.691 | 1.00 | 0.00 |
| ATOM | 1594 | C    | ARG | 100 | -0.736 | 6.851  | -8.112  | 1.00 | 0.00 |
| ATOM | 1595 | O    | ARG | 100 | -1.337 | 7.350  | -7.181  | 1.00 | 0.00 |
| ATOM | 1596 | N    | GLU | 101 | -0.880 | 5.588  | -8.411  | 1.00 | 0.00 |
| ATOM | 1597 | H    | GLU | 101 | -0.381 | 5.162  | -9.179  | 1.00 | 0.00 |
| ATOM | 1598 | CA   | GLU | 101 | -1.795 | 4.734  | -7.605  | 1.00 | 0.00 |
| ATOM | 1599 | HA   | GLU | 101 | -2.809 | 5.130  | -7.640  | 1.00 | 0.00 |
| ATOM | 1600 | CB   | GLU | 101 | -1.805 | 3.314  | -8.174  | 1.00 | 0.00 |
| ATOM | 1601 | HB2  | GLU | 101 | -0.784 | 2.934  | -8.221  | 1.00 | 0.00 |
| ATOM | 1602 | HB3  | GLU | 101 | -2.402 | 2.669  | -7.530  | 1.00 | 0.00 |
| ATOM | 1603 | CG   | GLU | 101 | -2.408 | 3.329  | -9.580  | 1.00 | 0.00 |
| ATOM | 1604 | HG2  | GLU | 101 | -1.737 | 3.857  | -10.257 | 1.00 | 0.00 |
| ATOM | 1605 | HG3  | GLU | 101 | -2.544 | 2.305  | -9.930  | 1.00 | 0.00 |
| ATOM | 1606 | CD   | GLU | 101 | -3.762 | 4.041  | -9.546  | 1.00 | 0.00 |
| ATOM | 1607 | OE1  | GLU | 101 | -4.472 | 3.877  | -8.568  | 1.00 | 0.00 |

|      |      |      |     |     |        |       |         |      |      |
|------|------|------|-----|-----|--------|-------|---------|------|------|
| ATOM | 1608 | OE2  | GLU | 101 | -4.067 | 4.738 | -10.501 | 1.00 | 0.00 |
| ATOM | 1609 | C    | GLU | 101 | -1.293 | 4.703 | -6.163  | 1.00 | 0.00 |
| ATOM | 1610 | O    | GLU | 101 | -2.062 | 4.719 | -5.222  | 1.00 | 0.00 |
| ATOM | 1611 | N    | LEU | 102 | 0.000  | 4.660 | -5.984  | 1.00 | 0.00 |
| ATOM | 1612 | H    | LEU | 102 | 0.642  | 4.644 | -6.764  | 1.00 | 0.00 |
| ATOM | 1613 | CA   | LEU | 102 | 0.563  | 4.631 | -4.607  | 1.00 | 0.00 |
| ATOM | 1614 | HA   | LEU | 102 | 0.260  | 3.719 | -4.093  | 1.00 | 0.00 |
| ATOM | 1615 | CB   | LEU | 102 | 2.091  | 4.665 | -4.682  | 1.00 | 0.00 |
| ATOM | 1616 | HB2  | LEU | 102 | 2.404  | 4.607 | -5.725  | 1.00 | 0.00 |
| ATOM | 1617 | HB3  | LEU | 102 | 2.454  | 5.595 | -4.246  | 1.00 | 0.00 |
| ATOM | 1618 | CG   | LEU | 102 | 2.673  | 3.478 | -3.908  | 1.00 | 0.00 |
| ATOM | 1619 | HG   | LEU | 102 | 2.590  | 3.667 | -2.838  | 1.00 | 0.00 |
| ATOM | 1620 | CD1  | LEU | 102 | 1.902  | 2.204 | -4.262  | 1.00 | 0.00 |
| ATOM | 1621 | HD11 | LEU | 102 | 1.986  | 2.013 | -5.332  | 1.00 | 0.00 |
| ATOM | 1622 | HD12 | LEU | 102 | 2.319  | 1.361 | -3.710  | 1.00 | 0.00 |
| ATOM | 1623 | HD13 | LEU | 102 | 0.852  | 2.328 | -3.997  | 1.00 | 0.00 |
| ATOM | 1624 | CD2  | LEU | 102 | 4.146  | 3.301 | -4.282  | 1.00 | 0.00 |
| ATOM | 1625 | HD21 | LEU | 102 | 4.697  | 4.206 | -4.028  | 1.00 | 0.00 |
| ATOM | 1626 | HD22 | LEU | 102 | 4.562  | 2.456 | -3.732  | 1.00 | 0.00 |
| ATOM | 1627 | HD23 | LEU | 102 | 4.230  | 3.113 | -5.353  | 1.00 | 0.00 |
| ATOM | 1628 | C    | LEU | 102 | 0.062  | 5.846 | -3.825  | 1.00 | 0.00 |
| ATOM | 1629 | O    | LEU | 102 | -0.227 | 5.762 | -2.650  | 1.00 | 0.00 |

|      |      |     |     |     |        |        |        |      |      |
|------|------|-----|-----|-----|--------|--------|--------|------|------|
| ATOM | 1630 | N   | MET | 103 | -0.050 | 6.976  | -4.470 | 1.00 | 0.00 |
| ATOM | 1631 | H   | MET | 103 | 0.184  | 7.057  | -5.449 | 1.00 | 0.00 |
| ATOM | 1632 | CA  | MET | 103 | -0.539 | 8.189  | -3.757 | 1.00 | 0.00 |
| ATOM | 1633 | HA  | MET | 103 | 0.094  | 8.401  | -2.895 | 1.00 | 0.00 |
| ATOM | 1634 | CB  | MET | 103 | -0.497 | 9.391  | -4.702 | 1.00 | 0.00 |
| ATOM | 1635 | HB2 | MET | 103 | -0.949 | 9.120  | -5.656 | 1.00 | 0.00 |
| ATOM | 1636 | HB3 | MET | 103 | -1.049 | 10.220 | -4.261 | 1.00 | 0.00 |
| ATOM | 1637 | CG  | MET | 103 | 0.958  | 9.810  | -4.928 | 1.00 | 0.00 |
| ATOM | 1638 | HG2 | MET | 103 | 1.437  | 10.011 | -3.970 | 1.00 | 0.00 |
| ATOM | 1639 | HG3 | MET | 103 | 1.496  | 9.013  | -5.442 | 1.00 | 0.00 |
| ATOM | 1640 | SD  | MET | 103 | 1.003  | 11.309 | -5.942 | 1.00 | 0.00 |
| ATOM | 1641 | CE  | MET | 103 | 0.744  | 12.497 | -4.603 | 1.00 | 0.00 |
| ATOM | 1642 | HE1 | MET | 103 | 1.550  | 12.405 | -3.874 | 1.00 | 0.00 |
| ATOM | 1643 | HE2 | MET | 103 | 0.737  | 13.508 | -5.010 | 1.00 | 0.00 |
| ATOM | 1644 | HE3 | MET | 103 | -0.210 | 12.294 | -4.116 | 1.00 | 0.00 |
| ATOM | 1645 | C   | MET | 103 | -1.978 | 7.951  | -3.297 | 1.00 | 0.00 |
| ATOM | 1646 | O   | MET | 103 | -2.407 | 8.454  | -2.278 | 1.00 | 0.00 |
| ATOM | 1647 | N   | SER | 104 | -2.725 | 7.181  | -4.041 | 1.00 | 0.00 |
| ATOM | 1648 | H   | SER | 104 | -2.372 | 6.759  | -4.888 | 1.00 | 0.00 |
| ATOM | 1649 | CA  | SER | 104 | -4.134 | 6.904  | -3.649 | 1.00 | 0.00 |
| ATOM | 1650 | HA  | SER | 104 | -4.598 | 7.803  | -3.246 | 1.00 | 0.00 |
| ATOM | 1651 | CB  | SER | 104 | -4.926 | 6.454  | -4.878 | 1.00 | 0.00 |

|      |      |      |     |     |        |        |        |      |      |
|------|------|------|-----|-----|--------|--------|--------|------|------|
| ATOM | 1652 | HB2  | SER | 104 | -5.967 | 6.291  | -4.601 | 1.00 | 0.00 |
| ATOM | 1653 | HB3  | SER | 104 | -4.871 | 7.223  | -5.648 | 1.00 | 0.00 |
| ATOM | 1654 | OG   | SER | 104 | -4.375 | 5.244  | -5.378 | 1.00 | 0.00 |
| ATOM | 1655 | HG   | SER | 104 | -4.871 | 4.961  | -6.149 | 1.00 | 0.00 |
| ATOM | 1656 | C    | SER | 104 | -4.158 | 5.797  | -2.593 | 1.00 | 0.00 |
| ATOM | 1657 | O    | SER | 104 | -5.016 | 5.763  | -1.734 | 1.00 | 0.00 |
| ATOM | 1658 | N    | LEU | 105 | -3.224 | 4.887  | -2.654 | 1.00 | 0.00 |
| ATOM | 1659 | H    | LEU | 105 | -2.513 | 4.907  | -3.371 | 1.00 | 0.00 |
| ATOM | 1660 | CA   | LEU | 105 | -3.192 | 3.779  | -1.659 | 1.00 | 0.00 |
| ATOM | 1661 | HA   | LEU | 105 | -3.940 | 3.026  | -1.908 | 1.00 | 0.00 |
| ATOM | 1662 | CB   | LEU | 105 | -1.811 | 3.118  | -1.671 | 1.00 | 0.00 |
| ATOM | 1663 | HB2  | LEU | 105 | -1.149 | 3.682  | -2.328 | 1.00 | 0.00 |
| ATOM | 1664 | HB3  | LEU | 105 | -1.401 | 3.112  | -0.661 | 1.00 | 0.00 |
| ATOM | 1665 | CG   | LEU | 105 | -1.931 | 1.679  | -2.181 | 1.00 | 0.00 |
| ATOM | 1666 | HG   | LEU | 105 | -0.993 | 1.152  | -2.004 | 1.00 | 0.00 |
| ATOM | 1667 | CD1  | LEU | 105 | -3.065 | 0.963  | -1.443 | 1.00 | 0.00 |
| ATOM | 1668 | HD11 | LEU | 105 | -4.003 | 1.488  | -1.621 | 1.00 | 0.00 |
| ATOM | 1669 | HD12 | LEU | 105 | -3.147 | -0.061 | -1.808 | 1.00 | 0.00 |
| ATOM | 1670 | HD13 | LEU | 105 | -2.852 | 0.950  | -0.374 | 1.00 | 0.00 |
| ATOM | 1671 | CD2  | LEU | 105 | -2.227 | 1.693  | -3.681 | 1.00 | 0.00 |
| ATOM | 1672 | HD21 | LEU | 105 | -1.417 | 2.198  | -4.207 | 1.00 | 0.00 |
| ATOM | 1673 | HD22 | LEU | 105 | -2.312 | 0.669  | -4.045 | 1.00 | 0.00 |

|      |      |      |     |     |        |       |        |      |      |
|------|------|------|-----|-----|--------|-------|--------|------|------|
| ATOM | 1674 | HD23 | LEU | 105 | -3.163 | 2.221 | -3.862 | 1.00 | 0.00 |
| ATOM | 1675 | C    | LEU | 105 | -3.484 | 4.324 | -0.259 | 1.00 | 0.00 |
| ATOM | 1676 | O    | LEU | 105 | -4.327 | 3.809 | 0.448  | 1.00 | 0.00 |
| ATOM | 1677 | N    | PRO | 106 | -2.776 | 5.390 | 0.152  | 1.00 | 0.00 |
| ATOM | 1678 | CD   | PRO | 106 | -1.740 | 6.088 | -0.630 | 1.00 | 0.00 |
| ATOM | 1679 | HD2  | PRO | 106 | -2.090 | 6.241 | -1.651 | 1.00 | 0.00 |
| ATOM | 1680 | HD3  | PRO | 106 | -0.827 | 5.492 | -0.646 | 1.00 | 0.00 |
| ATOM | 1681 | CG   | PRO | 106 | -1.569 | 7.378 | 0.122  | 1.00 | 0.00 |
| ATOM | 1682 | HG2  | PRO | 106 | -2.256 | 8.126 | -0.274 | 1.00 | 0.00 |
| ATOM | 1683 | HG3  | PRO | 106 | -0.544 | 7.732 | 0.012  | 1.00 | 0.00 |
| ATOM | 1684 | CB   | PRO | 106 | -1.872 | 7.060 | 1.545  | 1.00 | 0.00 |
| ATOM | 1685 | HB2  | PRO | 106 | -2.258 | 7.962 | 2.019  | 1.00 | 0.00 |
| ATOM | 1686 | HB3  | PRO | 106 | -1.027 | 6.680 | 2.121  | 1.00 | 0.00 |
| ATOM | 1687 | CA   | PRO | 106 | -2.971 | 6.000 | 1.471  | 1.00 | 0.00 |
| ATOM | 1688 | HA   | PRO | 106 | -2.873 | 5.225 | 2.231  | 1.00 | 0.00 |
| ATOM | 1689 | C    | PRO | 106 | -4.350 | 6.649 | 1.581  | 1.00 | 0.00 |
| ATOM | 1690 | O    | PRO | 106 | -4.755 | 7.108 | 2.631  | 1.00 | 0.00 |
| ATOM | 1691 | N    | GLN | 107 | -5.079 | 6.679 | 0.500  | 1.00 | 0.00 |
| ATOM | 1692 | H    | GLN | 107 | -4.742 | 6.297 | -0.373 | 1.00 | 0.00 |
| ATOM | 1693 | CA   | GLN | 107 | -6.437 | 7.283 | 0.528  | 1.00 | 0.00 |
| ATOM | 1694 | HA   | GLN | 107 | -6.537 | 7.945 | 1.388  | 1.00 | 0.00 |
| ATOM | 1695 | CB   | GLN | 107 | -6.663 | 8.099 | -0.746 | 1.00 | 0.00 |

|      |      |      |     |     |         |        |        |      |      |
|------|------|------|-----|-----|---------|--------|--------|------|------|
| ATOM | 1696 | HB2  | GLN | 107 | -5.880  | 8.851  | -0.840 | 1.00 | 0.00 |
| ATOM | 1697 | HB3  | GLN | 107 | -6.635  | 7.437  | -1.612 | 1.00 | 0.00 |
| ATOM | 1698 | CG   | GLN | 107 | -8.027  | 8.789  | -0.675 | 1.00 | 0.00 |
| ATOM | 1699 | HG2  | GLN | 107 | -8.819  | 8.048  | -0.565 | 1.00 | 0.00 |
| ATOM | 1700 | HG3  | GLN | 107 | -8.058  | 9.480  | 0.167  | 1.00 | 0.00 |
| ATOM | 1701 | CD   | GLN | 107 | -8.269  | 9.576  | -1.964 | 1.00 | 0.00 |
| ATOM | 1702 | OE1  | GLN | 107 | -7.382  | 9.708  | -2.785 | 1.00 | 0.00 |
| ATOM | 1703 | NE2  | GLN | 107 | -9.440  | 10.110 | -2.179 | 1.00 | 0.00 |
| ATOM | 1704 | HE21 | GLN | 107 | -9.606  | 10.630 | -3.028 | 1.00 | 0.00 |
| ATOM | 1705 | HE22 | GLN | 107 | -10.175 | 10.000 | -1.495 | 1.00 | 0.00 |
| ATOM | 1706 | C    | GLN | 107 | -7.477  | 6.168  | 0.614  | 1.00 | 0.00 |
| ATOM | 1707 | O    | GLN | 107 | -8.380  | 6.207  | 1.425  | 1.00 | 0.00 |
| ATOM | 1708 | N    | GLN | 108 | -7.359  | 5.173  | -0.222 | 1.00 | 0.00 |
| ATOM | 1709 | H    | GLN | 108 | -6.612  | 5.136  | -0.901 | 1.00 | 0.00 |
| ATOM | 1710 | CA   | GLN | 108 | -8.341  | 4.053  | -0.191 | 1.00 | 0.00 |
| ATOM | 1711 | HA   | GLN | 108 | -9.306  | 4.384  | -0.574 | 1.00 | 0.00 |
| ATOM | 1712 | CB   | GLN | 108 | -7.834  | 2.907  | -1.069 | 1.00 | 0.00 |
| ATOM | 1713 | HB2  | GLN | 108 | -7.634  | 3.279  | -2.074 | 1.00 | 0.00 |
| ATOM | 1714 | HB3  | GLN | 108 | -6.916  | 2.501  | -0.643 | 1.00 | 0.00 |
| ATOM | 1715 | CG   | GLN | 108 | -8.895  | 1.807  | -1.135 | 1.00 | 0.00 |
| ATOM | 1716 | HG2  | GLN | 108 | -9.175  | 1.488  | -0.131 | 1.00 | 0.00 |
| ATOM | 1717 | HG3  | GLN | 108 | -9.779  | 2.166  | -1.662 | 1.00 | 0.00 |

|      |      |      |     |     |        |        |        |      |      |
|------|------|------|-----|-----|--------|--------|--------|------|------|
| ATOM | 1718 | CD   | GLN | 108 | -8.331 | 0.602  | -1.891 | 1.00 | 0.00 |
| ATOM | 1719 | OE1  | GLN | 108 | -7.422 | -0.053 | -1.423 | 1.00 | 0.00 |
| ATOM | 1720 | NE2  | GLN | 108 | -8.838 | 0.279  | -3.050 | 1.00 | 0.00 |
| ATOM | 1721 | HE21 | GLN | 108 | -8.471 | -0.516 | -3.555 | 1.00 | 0.00 |
| ATOM | 1722 | HE22 | GLN | 108 | -9.595 | 0.824  | -3.436 | 1.00 | 0.00 |
| ATOM | 1723 | C    | GLN | 108 | -8.508 | 3.559  | 1.246  | 1.00 | 0.00 |
| ATOM | 1724 | O    | GLN | 108 | -9.552 | 3.068  | 1.628  | 1.00 | 0.00 |
| ATOM | 1725 | N    | CYX | 109 | -7.487 | 3.685  | 2.048  | 1.00 | 0.00 |
| ATOM | 1726 | H    | CYX | 109 | -6.615 | 4.090  | 1.738  | 1.00 | 0.00 |
| ATOM | 1727 | CA   | CYX | 109 | -7.587 | 3.222  | 3.461  | 1.00 | 0.00 |
| ATOM | 1728 | HA   | CYX | 109 | -8.630 | 3.058  | 3.731  | 1.00 | 0.00 |
| ATOM | 1729 | CB   | CYX | 109 | -6.826 | 1.902  | 3.627  | 1.00 | 0.00 |
| ATOM | 1730 | HB2  | CYX | 109 | -6.378 | 1.862  | 4.620  | 1.00 | 0.00 |
| ATOM | 1731 | HB3  | CYX | 109 | -7.515 | 1.066  | 3.506  | 1.00 | 0.00 |
| ATOM | 1732 | SG   | CYX | 109 | -5.484 | 1.809  | 2.413  | 1.00 | 0.00 |
| ATOM | 1733 | C    | CYX | 109 | -6.982 | 4.281  | 4.387  | 1.00 | 0.00 |
| ATOM | 1734 | O    | CYX | 109 | -6.512 | 3.978  | 5.466  | 1.00 | 0.00 |
| ATOM | 1735 | N    | ASN | 110 | -6.994 | 5.518  | 3.974  | 1.00 | 0.00 |
| ATOM | 1736 | H    | ASN | 110 | -7.384 | 5.773  | 3.078  | 1.00 | 0.00 |
| ATOM | 1737 | CA   | ASN | 110 | -6.423 | 6.597  | 4.829  | 1.00 | 0.00 |
| ATOM | 1738 | HA   | ASN | 110 | -6.235 | 7.491  | 4.234  | 1.00 | 0.00 |
| ATOM | 1739 | CB   | ASN | 110 | -7.416 | 6.948  | 5.939  | 1.00 | 0.00 |



|      |      |          |     |         |        |       |      |      |
|------|------|----------|-----|---------|--------|-------|------|------|
| ATOM | 1740 | HB2 ASN  | 110 | -7.512  | 6.115  | 6.636 | 1.00 | 0.00 |
| ATOM | 1741 | HB3 ASN  | 110 | -7.083  | 7.835  | 6.477 | 1.00 | 0.00 |
| ATOM | 1742 | CG ASN   | 110 | -8.788  | 7.234  | 5.326 | 1.00 | 0.00 |
| ATOM | 1743 | OD1 ASN  | 110 | -8.894  | 7.959  | 4.357 | 1.00 | 0.00 |
| ATOM | 1744 | ND2 ASN  | 110 | -9.851  | 6.691  | 5.854 | 1.00 | 0.00 |
| ATOM | 1745 | HD21 ASN | 110 | -10.760 | 6.875  | 5.454 | 1.00 | 0.00 |
| ATOM | 1746 | HD22 ASN | 110 | -9.759  | 6.088  | 6.660 | 1.00 | 0.00 |
| ATOM | 1747 | C ASN    | 110 | -5.112  | 6.117  | 5.453 | 1.00 | 0.00 |
| ATOM | 1748 | O ASN    | 110 | -4.872  | 6.295  | 6.631 | 1.00 | 0.00 |
| ATOM | 1749 | N PHE    | 111 | -4.259  | 5.508  | 4.673 | 1.00 | 0.00 |
| ATOM | 1750 | H PHE    | 111 | -4.449  | 5.351  | 3.693 | 1.00 | 0.00 |
| ATOM | 1751 | CA PHE   | 111 | -2.965  | 5.021  | 5.227 | 1.00 | 0.00 |
| ATOM | 1752 | HA PHE   | 111 | -3.135  | 4.454  | 6.142 | 1.00 | 0.00 |
| ATOM | 1753 | CB PHE   | 111 | -2.284  | 4.108  | 4.206 | 1.00 | 0.00 |
| ATOM | 1754 | HB2 PHE  | 111 | -2.995  | 3.671  | 3.505 | 1.00 | 0.00 |
| ATOM | 1755 | HB3 PHE  | 111 | -1.499  | 4.623  | 3.653 | 1.00 | 0.00 |
| ATOM | 1756 | CG PHE   | 111 | -1.622  | 2.956  | 4.924 | 1.00 | 0.00 |
| ATOM | 1757 | CD1 PHE  | 111 | -2.377  | 1.836  | 5.294 | 1.00 | 0.00 |
| ATOM | 1758 | HD1 PHE  | 111 | -3.441  | 1.794  | 5.063 | 1.00 | 0.00 |
| ATOM | 1759 | CE1 PHE  | 111 | -1.763  | 0.769  | 5.961 | 1.00 | 0.00 |
| ATOM | 1760 | HE1 PHE  | 111 | -2.351  | -0.102 | 6.251 | 1.00 | 0.00 |
| ATOM | 1761 | CZ PHE   | 111 | -0.395  | 0.820  | 6.256 | 1.00 | 0.00 |

|      |      |     |     |     |        |        |       |      |      |
|------|------|-----|-----|-----|--------|--------|-------|------|------|
| ATOM | 1762 | HZ  | PHE | 111 | 0.083  | -0.012 | 6.774 | 1.00 | 0.00 |
| ATOM | 1763 | CE2 | PHE | 111 | 0.359  | 1.940  | 5.885 | 1.00 | 0.00 |
| ATOM | 1764 | HE2 | PHE | 111 | 1.424  | 1.981  | 6.115 | 1.00 | 0.00 |
| ATOM | 1765 | CD2 | PHE | 111 | -0.255 | 3.007  | 5.219 | 1.00 | 0.00 |
| ATOM | 1766 | HD2 | PHE | 111 | 0.332  | 3.878  | 4.930 | 1.00 | 0.00 |
| ATOM | 1767 | C   | PHE | 111 | -2.058 | 6.214  | 5.531 | 1.00 | 0.00 |
| ATOM | 1768 | O   | PHE | 111 | -0.972 | 6.063  | 6.053 | 1.00 | 0.00 |
| ATOM | 1769 | N   | ARG | 112 | -2.495 | 7.402  | 5.210 | 1.00 | 0.00 |
| ATOM | 1770 | H   | ARG | 112 | -3.397 | 7.537  | 4.777 | 1.00 | 0.00 |
| ATOM | 1771 | CA  | ARG | 112 | -1.655 | 8.602  | 5.484 | 1.00 | 0.00 |
| ATOM | 1772 | HA  | ARG | 112 | -0.804 | 8.631  | 4.803 | 1.00 | 0.00 |
| ATOM | 1773 | CB  | ARG | 112 | -2.490 | 9.868  | 5.278 | 1.00 | 0.00 |
| ATOM | 1774 | HB2 | ARG | 112 | -3.375 | 9.827  | 5.913 | 1.00 | 0.00 |
| ATOM | 1775 | HB3 | ARG | 112 | -1.895 | 10.742 | 5.541 | 1.00 | 0.00 |
| ATOM | 1776 | CG  | ARG | 112 | -2.918 | 9.964  | 3.811 | 1.00 | 0.00 |
| ATOM | 1777 | HG2 | ARG | 112 | -2.036 | 9.931  | 3.171 | 1.00 | 0.00 |
| ATOM | 1778 | HG3 | ARG | 112 | -3.574 | 9.128  | 3.567 | 1.00 | 0.00 |
| ATOM | 1779 | CD  | ARG | 112 | -3.664 | 11.280 | 3.584 | 1.00 | 0.00 |
| ATOM | 1780 | HD2 | ARG | 112 | -3.015 | 12.125 | 3.813 | 1.00 | 0.00 |
| ATOM | 1781 | HD3 | ARG | 112 | -3.999 | 11.350 | 2.549 | 1.00 | 0.00 |
| ATOM | 1782 | NE  | ARG | 112 | -4.855 | 11.336 | 4.477 | 1.00 | 0.00 |
| ATOM | 1783 | HE  | ARG | 112 | -5.553 | 10.605 | 4.472 | 1.00 | 0.00 |

|      |      |      |     |     |        |        |        |      |      |
|------|------|------|-----|-----|--------|--------|--------|------|------|
| ATOM | 1784 | CZ   | ARG | 112 | -5.015 | 12.345 | 5.290  | 1.00 | 0.00 |
| ATOM | 1785 | NH1  | ARG | 112 | -4.566 | 12.273 | 6.513  | 1.00 | 0.00 |
| ATOM | 1786 | HH11 | ARG | 112 | -4.095 | 11.436 | 6.827  | 1.00 | 0.00 |
| ATOM | 1787 | HH12 | ARG | 112 | -4.691 | 13.054 | 7.140  | 1.00 | 0.00 |
| ATOM | 1788 | NH2  | ARG | 112 | -5.623 | 13.423 | 4.880  | 1.00 | 0.00 |
| ATOM | 1789 | HH21 | ARG | 112 | -5.969 | 13.474 | 3.933  | 1.00 | 0.00 |
| ATOM | 1790 | HH22 | ARG | 112 | -5.745 | 14.201 | 5.512  | 1.00 | 0.00 |
| ATOM | 1791 | C    | ARG | 112 | -1.156 | 8.551  | 6.929  | 1.00 | 0.00 |
| ATOM | 1792 | O    | ARG | 112 | -1.769 | 7.948  | 7.787  | 1.00 | 0.00 |
| ATOM | 1793 | N    | ALA | 113 | -0.046 | 9.181  | 7.207  | 1.00 | 0.00 |
| ATOM | 1794 | H    | ALA | 113 | 0.471  | 9.685  | 6.501  | 1.00 | 0.00 |
| ATOM | 1795 | CA   | ALA | 113 | 0.489  | 9.166  | 8.597  | 1.00 | 0.00 |
| ATOM | 1796 | HA   | ALA | 113 | -0.278 | 8.898  | 9.324  | 1.00 | 0.00 |
| ATOM | 1797 | CB   | ALA | 113 | 1.629  | 8.151  | 8.694  | 1.00 | 0.00 |
| ATOM | 1798 | HB1  | ALA | 113 | 2.409  | 8.410  | 7.978  | 1.00 | 0.00 |
| ATOM | 1799 | HB2  | ALA | 113 | 2.043  | 8.163  | 9.702  | 1.00 | 0.00 |
| ATOM | 1800 | HB3  | ALA | 113 | 1.249  | 7.154  | 8.470  | 1.00 | 0.00 |
| ATOM | 1801 | C    | ALA | 113 | 1.013  | 10.557 | 8.958  | 1.00 | 0.00 |
| ATOM | 1802 | O    | ALA | 113 | 1.233  | 11.389 | 8.100  | 1.00 | 0.00 |
| ATOM | 1803 | N    | PRO | 114 | 1.216  | 10.808 | 10.260 | 1.00 | 0.00 |
| ATOM | 1804 | CD   | PRO | 114 | 0.973  | 9.854  | 11.355 | 1.00 | 0.00 |
| ATOM | 1805 | HD2  | PRO | 114 | 1.437  | 8.897  | 11.113 | 1.00 | 0.00 |

|      |      |         |     |        |        |        |      |      |
|------|------|---------|-----|--------|--------|--------|------|------|
| ATOM | 1806 | HD3 PRO | 114 | -0.100 | 9.714  | 11.483 | 1.00 | 0.00 |
| ATOM | 1807 | CG PRO  | 114 | 1.610  | 10.520 | 12.541 | 1.00 | 0.00 |
| ATOM | 1808 | HG2 PRO | 114 | 2.634  | 10.162 | 12.650 | 1.00 | 0.00 |
| ATOM | 1809 | HG3 PRO | 114 | 1.043  | 10.277 | 13.440 | 1.00 | 0.00 |
| ATOM | 1810 | CB PRO  | 114 | 1.572  | 11.986 | 12.266 | 1.00 | 0.00 |
| ATOM | 1811 | HB2 PRO | 114 | 2.430  | 12.447 | 12.755 | 1.00 | 0.00 |
| ATOM | 1812 | HB3 PRO | 114 | 0.659  | 12.484 | 12.590 | 1.00 | 0.00 |
| ATOM | 1813 | CA PRO  | 114 | 1.717  | 12.098 | 10.749 | 1.00 | 0.00 |
| ATOM | 1814 | HA PRO  | 114 | 1.113  | 12.890 | 10.308 | 1.00 | 0.00 |
| ATOM | 1815 | C PRO   | 114 | 3.187  | 12.312 | 10.379 | 1.00 | 0.00 |
| ATOM | 1816 | O PRO   | 114 | 3.717  | 13.398 | 10.502 | 1.00 | 0.00 |
| ATOM | 1817 | N GLN   | 115 | 3.849  | 11.283 | 9.924  | 1.00 | 0.00 |
| ATOM | 1818 | H GLN   | 115 | 3.414  | 10.377 | 9.819  | 1.00 | 0.00 |
| ATOM | 1819 | CA GLN  | 115 | 5.282  | 11.426 | 9.544  | 1.00 | 0.00 |
| ATOM | 1820 | HA GLN  | 115 | 5.697  | 12.340 | 9.968  | 1.00 | 0.00 |
| ATOM | 1821 | CB GLN  | 115 | 6.074  | 10.233 | 10.084 | 1.00 | 0.00 |
| ATOM | 1822 | HB2 GLN | 115 | 5.712  | 9.315  | 9.620  | 1.00 | 0.00 |
| ATOM | 1823 | HB3 GLN | 115 | 7.131  | 10.363 | 9.852  | 1.00 | 0.00 |
| ATOM | 1824 | CG GLN  | 115 | 5.892  | 10.143 | 11.601 | 1.00 | 0.00 |
| ATOM | 1825 | HG2 GLN | 115 | 4.844  | 9.971  | 11.846 | 1.00 | 0.00 |
| ATOM | 1826 | HG3 GLN | 115 | 6.497  | 9.333  | 12.009 | 1.00 | 0.00 |
| ATOM | 1827 | CD GLN  | 115 | 6.336  | 11.457 | 12.246 | 1.00 | 0.00 |

|      |      |      |     |     |       |        |        |      |      |
|------|------|------|-----|-----|-------|--------|--------|------|------|
| ATOM | 1828 | OE1  | GLN | 115 | 7.431 | 11.926 | 12.003 | 1.00 | 0.00 |
| ATOM | 1829 | NE2  | GLN | 115 | 5.529 | 12.074 | 13.064 | 1.00 | 0.00 |
| ATOM | 1830 | HE21 | GLN | 115 | 5.817 | 12.942 | 13.493 | 1.00 | 0.00 |
| ATOM | 1831 | HE22 | GLN | 115 | 4.621 | 11.680 | 13.264 | 1.00 | 0.00 |
| ATOM | 1832 | C    | GLN | 115 | 5.403 | 11.471 | 8.020  | 1.00 | 0.00 |
| ATOM | 1833 | O    | GLN | 115 | 4.591 | 10.914 | 7.306  | 1.00 | 0.00 |
| ATOM | 1834 | N    | ARG | 116 | 6.409 | 12.128 | 7.514  | 1.00 | 0.00 |
| ATOM | 1835 | H    | ARG | 116 | 7.087 | 12.593 | 8.100  | 1.00 | 0.00 |
| ATOM | 1836 | CA   | ARG | 116 | 6.580 | 12.207 | 6.036  | 1.00 | 0.00 |
| ATOM | 1837 | HA   | ARG | 116 | 5.754 | 11.704 | 5.532  | 1.00 | 0.00 |
| ATOM | 1838 | CB   | ARG | 116 | 6.598 | 13.674 | 5.602  | 1.00 | 0.00 |
| ATOM | 1839 | HB2  | ARG | 116 | 7.406 | 14.195 | 6.115  | 1.00 | 0.00 |
| ATOM | 1840 | HB3  | ARG | 116 | 6.755 | 13.733 | 4.525  | 1.00 | 0.00 |
| ATOM | 1841 | CG   | ARG | 116 | 5.261 | 14.327 | 5.959  | 1.00 | 0.00 |
| ATOM | 1842 | HG2  | ARG | 116 | 4.450 | 13.782 | 5.476  | 1.00 | 0.00 |
| ATOM | 1843 | HG3  | ARG | 116 | 5.122 | 14.302 | 7.040  | 1.00 | 0.00 |
| ATOM | 1844 | CD   | ARG | 116 | 5.258 | 15.779 | 5.477  | 1.00 | 0.00 |
| ATOM | 1845 | HD2  | ARG | 116 | 6.172 | 16.283 | 5.791  | 1.00 | 0.00 |
| ATOM | 1846 | HD3  | ARG | 116 | 5.179 | 15.816 | 4.390  | 1.00 | 0.00 |
| ATOM | 1847 | NE   | ARG | 116 | 4.091 | 16.495 | 6.066  | 1.00 | 0.00 |
| ATOM | 1848 | HE   | ARG | 116 | 4.185 | 17.065 | 6.894  | 1.00 | 0.00 |
| ATOM | 1849 | CZ   | ARG | 116 | 2.916 | 16.395 | 5.509  | 1.00 | 0.00 |

|      |      |      |     |     |        |        |       |      |      |
|------|------|------|-----|-----|--------|--------|-------|------|------|
| ATOM | 1850 | NH1  | ARG | 116 | 2.699  | 15.483 | 4.601 | 1.00 | 0.00 |
| ATOM | 1851 | HH11 | ARG | 116 | 3.444  | 14.855 | 4.332 | 1.00 | 0.00 |
| ATOM | 1852 | HH12 | ARG | 116 | 1.788  | 15.408 | 4.172 | 1.00 | 0.00 |
| ATOM | 1853 | NH2  | ARG | 116 | 1.955  | 17.205 | 5.862 | 1.00 | 0.00 |
| ATOM | 1854 | HH21 | ARG | 116 | 2.125  | 17.908 | 6.567 | 1.00 | 0.00 |
| ATOM | 1855 | HH22 | ARG | 116 | 1.047  | 17.124 | 5.429 | 1.00 | 0.00 |
| ATOM | 1856 | C    | ARG | 116 | 7.898  | 11.541 | 5.637 | 1.00 | 0.00 |
| ATOM | 1857 | O    | ARG | 116 | 8.843  | 11.509 | 6.399 | 1.00 | 0.00 |
| ATOM | 1858 | N    | CYX | 117 | 7.968  | 11.006 | 4.449 | 1.00 | 0.00 |
| ATOM | 1859 | H    | CYX | 117 | 7.186  | 11.028 | 3.810 | 1.00 | 0.00 |
| ATOM | 1860 | CA   | CYX | 117 | 9.224  | 10.342 | 4.004 | 1.00 | 0.00 |
| ATOM | 1861 | HA   | CYX | 117 | 9.955  | 10.334 | 4.813 | 1.00 | 0.00 |
| ATOM | 1862 | CB   | CYX | 117 | 8.923  | 8.896  | 3.603 | 1.00 | 0.00 |
| ATOM | 1863 | HB2  | CYX | 117 | 8.150  | 8.884  | 2.835 | 1.00 | 0.00 |
| ATOM | 1864 | HB3  | CYX | 117 | 9.828  | 8.430  | 3.213 | 1.00 | 0.00 |
| ATOM | 1865 | SG   | CYX | 117 | 8.293  | 7.991  | 5.038 | 1.00 | 0.00 |
| ATOM | 1866 | C    | CYX | 117 | 9.800  | 11.093 | 2.802 | 1.00 | 0.00 |
| ATOM | 1867 | O    | CYX | 117 | 9.103  | 11.811 | 2.114 | 1.00 | 0.00 |
| ATOM | 1868 | N    | ASP | 118 | 11.070 | 10.932 | 2.543 | 1.00 | 0.00 |
| ATOM | 1869 | H    | ASP | 118 | 11.657 | 10.337 | 3.110 | 1.00 | 0.00 |
| ATOM | 1870 | CA   | ASP | 118 | 11.688 | 11.637 | 1.385 | 1.00 | 0.00 |
| ATOM | 1871 | HA   | ASP | 118 | 11.395 | 12.686 | 1.381 | 1.00 | 0.00 |

|      |      |      |     |     |        |        |        |      |      |
|------|------|------|-----|-----|--------|--------|--------|------|------|
| ATOM | 1872 | CB   | ASP | 118 | 13.212 | 11.556 | 1.493  | 1.00 | 0.00 |
| ATOM | 1873 | HB2  | ASP | 118 | 13.523 | 10.511 | 1.505  | 1.00 | 0.00 |
| ATOM | 1874 | HB3  | ASP | 118 | 13.663 | 12.058 | 0.637  | 1.00 | 0.00 |
| ATOM | 1875 | CG   | ASP | 118 | 13.669 | 12.238 | 2.784  | 1.00 | 0.00 |
| ATOM | 1876 | OD1  | ASP | 118 | 12.875 | 12.963 | 3.361  | 1.00 | 0.00 |
| ATOM | 1877 | OD2  | ASP | 118 | 14.805 | 12.022 | 3.175  | 1.00 | 0.00 |
| ATOM | 1878 | C    | ASP | 118 | 11.232 | 10.975 | 0.083  | 1.00 | 0.00 |
| ATOM | 1879 | O    | ASP | 118 | 11.019 | 9.781  | 0.025  | 1.00 | 0.00 |
| ATOM | 1880 | N    | LEU | 119 | 11.078 | 11.743 | -0.961 | 1.00 | 0.00 |
| ATOM | 1881 | H    | LEU | 119 | 11.253 | 12.736 | -0.920 | 1.00 | 0.00 |
| ATOM | 1882 | CA   | LEU | 119 | 10.633 | 11.157 | -2.256 | 1.00 | 0.00 |
| ATOM | 1883 | HA   | LEU | 119 | 9.821  | 10.449 | -2.092 | 1.00 | 0.00 |
| ATOM | 1884 | CB   | LEU | 119 | 10.131 | 12.274 | -3.173 | 1.00 | 0.00 |
| ATOM | 1885 | HB2  | LEU | 119 | 10.832 | 13.108 | -3.146 | 1.00 | 0.00 |
| ATOM | 1886 | HB3  | LEU | 119 | 10.050 | 11.900 | -4.194 | 1.00 | 0.00 |
| ATOM | 1887 | CG   | LEU | 119 | 8.757  | 12.747 | -2.693 | 1.00 | 0.00 |
| ATOM | 1888 | HG   | LEU | 119 | 8.150  | 11.883 | -2.421 | 1.00 | 0.00 |
| ATOM | 1889 | CD1  | LEU | 119 | 8.928  | 13.655 | -1.474 | 1.00 | 0.00 |
| ATOM | 1890 | HD11 | LEU | 119 | 9.535  | 14.518 | -1.746 | 1.00 | 0.00 |
| ATOM | 1891 | HD12 | LEU | 119 | 7.950  | 13.992 | -1.132 | 1.00 | 0.00 |
| ATOM | 1892 | HD13 | LEU | 119 | 9.422  | 13.102 | -0.675 | 1.00 | 0.00 |
| ATOM | 1893 | CD2  | LEU | 119 | 8.062  | 13.522 | -3.814 | 1.00 | 0.00 |

|      |      |      |     |     |        |        |        |      |      |
|------|------|------|-----|-----|--------|--------|--------|------|------|
| ATOM | 1894 | HD21 | LEU | 119 | 7.940  | 12.874 | -4.682 | 1.00 | 0.00 |
| ATOM | 1895 | HD22 | LEU | 119 | 7.084  | 13.858 | -3.471 | 1.00 | 0.00 |
| ATOM | 1896 | HD23 | LEU | 119 | 8.667  | 14.386 | -4.088 | 1.00 | 0.00 |
| ATOM | 1897 | C    | LEU | 119 | 11.807 | 10.438 | -2.924 | 1.00 | 0.00 |
| ATOM | 1898 | O    | LEU | 119 | 11.626 | 9.592  | -3.776 | 1.00 | 0.00 |
| ATOM | 1899 | N    | ASP | 120 | 13.012 | 10.766 | -2.542 | 1.00 | 0.00 |
| ATOM | 1900 | H    | ASP | 120 | 13.173 | 11.469 | -1.835 | 1.00 | 0.00 |
| ATOM | 1901 | CA   | ASP | 120 | 14.194 | 10.098 | -3.156 | 1.00 | 0.00 |
| ATOM | 1902 | HA   | ASP | 120 | 14.138 | 10.155 | -4.243 | 1.00 | 0.00 |
| ATOM | 1903 | CB   | ASP | 120 | 15.474 | 10.798 | -2.695 | 1.00 | 0.00 |
| ATOM | 1904 | HB2  | ASP | 120 | 16.337 | 10.326 | -3.165 | 1.00 | 0.00 |
| ATOM | 1905 | HB3  | ASP | 120 | 15.436 | 11.849 | -2.979 | 1.00 | 0.00 |
| ATOM | 1906 | CG   | ASP | 120 | 15.596 | 10.685 | -1.174 | 1.00 | 0.00 |
| ATOM | 1907 | OD1  | ASP | 120 | 14.586 | 10.441 | -0.534 | 1.00 | 0.00 |
| ATOM | 1908 | OD2  | ASP | 120 | 16.698 | 10.844 | -0.675 | 1.00 | 0.00 |
| ATOM | 1909 | C    | ASP | 120 | 14.231 | 8.630  | -2.727 | 1.00 | 0.00 |
| ATOM | 1910 | O    | ASP | 120 | 14.690 | 7.772  | -3.454 | 1.00 | 0.00 |
| ATOM | 1911 | N    | VAL | 121 | 13.753 | 8.335  | -1.549 | 1.00 | 0.00 |
| ATOM | 1912 | H    | VAL | 121 | 13.371 | 9.042  | -0.939 | 1.00 | 0.00 |
| ATOM | 1913 | CA   | VAL | 121 | 13.762 | 6.922  | -1.074 | 1.00 | 0.00 |
| ATOM | 1914 | HA   | VAL | 121 | 14.787 | 6.569  | -0.954 | 1.00 | 0.00 |
| ATOM | 1915 | CB   | VAL | 121 | 13.054 | 6.836  | 0.280  | 1.00 | 0.00 |



|      |      |      |     |     |        |       |        |      |      |
|------|------|------|-----|-----|--------|-------|--------|------|------|
| ATOM | 1916 | HB   | VAL | 121 | 12.093 | 7.346 | 0.221  | 1.00 | 0.00 |
| ATOM | 1917 | CG1  | VAL | 121 | 12.829 | 5.367 | 0.646  | 1.00 | 0.00 |
| ATOM | 1918 | HG11 | VAL | 121 | 13.790 | 4.855 | 0.706  | 1.00 | 0.00 |
| ATOM | 1919 | HG12 | VAL | 121 | 12.325 | 5.305 | 1.610  | 1.00 | 0.00 |
| ATOM | 1920 | HG13 | VAL | 121 | 12.212 | 4.892 | -0.117 | 1.00 | 0.00 |
| ATOM | 1921 | CG2  | VAL | 121 | 13.921 | 7.501 | 1.351  | 1.00 | 0.00 |
| ATOM | 1922 | HG21 | VAL | 121 | 14.082 | 8.547 | 1.091  | 1.00 | 0.00 |
| ATOM | 1923 | HG22 | VAL | 121 | 13.418 | 7.440 | 2.316  | 1.00 | 0.00 |
| ATOM | 1924 | HG23 | VAL | 121 | 14.882 | 6.989 | 1.410  | 1.00 | 0.00 |
| ATOM | 1925 | C    | VAL | 121 | 13.032 | 6.038 | -2.088 | 1.00 | 0.00 |
| ATOM | 1926 | O    | VAL | 121 | 13.505 | 4.983 | -2.460 | 1.00 | 0.00 |
| ATOM | 1927 | N    | SER | 122 | 11.884 | 6.461 | -2.539 | 1.00 | 0.00 |
| ATOM | 1928 | H    | SER | 122 | 11.485 | 7.337 | -2.234 | 1.00 | 0.00 |
| ATOM | 1929 | CA   | SER | 122 | 11.125 | 5.645 | -3.529 | 1.00 | 0.00 |
| ATOM | 1930 | HA   | SER | 122 | 10.867 | 4.676 | -3.101 | 1.00 | 0.00 |
| ATOM | 1931 | CB   | SER | 122 | 9.833  | 6.372 | -3.908 | 1.00 | 0.00 |
| ATOM | 1932 | HB2  | SER | 122 | 10.076 | 7.303 | -4.420 | 1.00 | 0.00 |
| ATOM | 1933 | HB3  | SER | 122 | 9.240  | 5.739 | -4.568 | 1.00 | 0.00 |
| ATOM | 1934 | OG   | SER | 122 | 9.089  | 6.658 | -2.733 | 1.00 | 0.00 |
| ATOM | 1935 | HG   | SER | 122 | 8.279  | 7.114 | -2.971 | 1.00 | 0.00 |
| ATOM | 1936 | C    | SER | 122 | 11.979 | 5.437 | -4.781 | 1.00 | 0.00 |
| ATOM | 1937 | O    | SER | 122 | 11.927 | 4.403 | -5.416 | 1.00 | 0.00 |

|      |      |     |     |     |        |        |        |      |      |
|------|------|-----|-----|-----|--------|--------|--------|------|------|
| ATOM | 1938 | N   | GLY | 123 | 12.766 | 6.414  | -5.143 | 1.00 | 0.00 |
| ATOM | 1939 | H   | GLY | 123 | 12.815 | 7.277  | -4.621 | 1.00 | 0.00 |
| ATOM | 1940 | CA  | GLY | 123 | 13.622 | 6.271  | -6.354 | 1.00 | 0.00 |
| ATOM | 1941 | HA2 | GLY | 123 | 13.132 | 5.623  | -7.081 | 1.00 | 0.00 |
| ATOM | 1942 | HA3 | GLY | 123 | 13.800 | 7.249  | -6.801 | 1.00 | 0.00 |
| ATOM | 1943 | C   | GLY | 123 | 14.964 | 5.652  | -5.961 | 1.00 | 0.00 |
| ATOM | 1944 | O   | GLY | 123 | 15.909 | 5.655  | -6.725 | 1.00 | 0.00 |
| ATOM | 1945 | N   | GLY | 124 | 15.056 | 5.117  | -4.773 | 1.00 | 0.00 |
| ATOM | 1946 | H   | GLY | 124 | 14.276 | 5.109  | -4.132 | 1.00 | 0.00 |
| ATOM | 1947 | CA  | GLY | 124 | 16.337 | 4.497  | -4.333 | 1.00 | 0.00 |
| ATOM | 1948 | HA2 | GLY | 124 | 17.145 | 5.226  | -4.397 | 1.00 | 0.00 |
| ATOM | 1949 | HA3 | GLY | 124 | 16.246 | 4.144  | -3.305 | 1.00 | 0.00 |
| ATOM | 1950 | C   | GLY | 124 | 16.667 | 3.309  | -5.239 | 1.00 | 0.00 |
| ATOM | 1951 | O   | GLY | 124 | 16.678 | 3.422  | -6.448 | 1.00 | 0.00 |
| ATOM | 1952 | N   | ARG | 125 | 16.936 | 2.168  | -4.663 | 1.00 | 0.00 |
| ATOM | 1953 | H   | ARG | 125 | 16.929 | 2.064  | -3.658 | 1.00 | 0.00 |
| ATOM | 1954 | CA  | ARG | 125 | 17.263 | 0.975  | -5.493 | 1.00 | 0.00 |
| ATOM | 1955 | HA  | ARG | 125 | 18.137 | 1.173  | -6.114 | 1.00 | 0.00 |
| ATOM | 1956 | CB  | ARG | 125 | 17.573 | -0.213 | -4.578 | 1.00 | 0.00 |
| ATOM | 1957 | HB2 | ARG | 125 | 16.748 | -0.362 | -3.882 | 1.00 | 0.00 |
| ATOM | 1958 | HB3 | ARG | 125 | 17.706 | -1.112 | -5.180 | 1.00 | 0.00 |
| ATOM | 1959 | CG  | ARG | 125 | 18.856 | 0.070  | -3.795 | 1.00 | 0.00 |

|      |      |          |     |        |        |        |      |      |
|------|------|----------|-----|--------|--------|--------|------|------|
| ATOM | 1960 | HG2 ARG  | 125 | 19.655 | 0.333  | -4.488 | 1.00 | 0.00 |
| ATOM | 1961 | HG3 ARG  | 125 | 18.687 | 0.897  | -3.106 | 1.00 | 0.00 |
| ATOM | 1962 | CD ARG   | 125 | 19.257 | -1.178 | -3.005 | 1.00 | 0.00 |
| ATOM | 1963 | HD2 ARG  | 125 | 18.404 | -1.563 | -2.447 | 1.00 | 0.00 |
| ATOM | 1964 | HD3 ARG  | 125 | 19.627 | -1.950 | -3.680 | 1.00 | 0.00 |
| ATOM | 1965 | NE ARG   | 125 | 20.339 | -0.828 | -2.042 | 1.00 | 0.00 |
| ATOM | 1966 | HE ARG   | 125 | 20.273 | -0.016 | -1.445 | 1.00 | 0.00 |
| ATOM | 1967 | CZ ARG   | 125 | 21.403 | -1.578 | -1.956 | 1.00 | 0.00 |
| ATOM | 1968 | NH1 ARG  | 125 | 22.005 | -1.984 | -3.041 | 1.00 | 0.00 |
| ATOM | 1969 | HH11 ARG | 125 | 21.645 | -1.716 | -3.946 | 1.00 | 0.00 |
| ATOM | 1970 | HH12 ARG | 125 | 22.829 | -2.565 | -2.971 | 1.00 | 0.00 |
| ATOM | 1971 | NH2 ARG  | 125 | 21.866 | -1.923 | -0.786 | 1.00 | 0.00 |
| ATOM | 1972 | HH21 ARG | 125 | 21.399 | -1.608 | 0.052  | 1.00 | 0.00 |
| ATOM | 1973 | HH22 ARG | 125 | 22.690 | -2.504 | -0.724 | 1.00 | 0.00 |
| ATOM | 1974 | C ARG    | 125 | 16.068 | 0.633  | -6.385 | 1.00 | 0.00 |
| ATOM | 1975 | O ARG    | 125 | 16.224 | 0.146  | -7.489 | 1.00 | 0.00 |
| ATOM | 1976 | N CYX    | 126 | 14.877 | 0.884  | -5.919 | 1.00 | 0.00 |
| ATOM | 1977 | H CYX    | 126 | 14.741 | 1.288  | -5.004 | 1.00 | 0.00 |
| ATOM | 1978 | CA CYX   | 126 | 13.673 | 0.574  | -6.741 | 1.00 | 0.00 |
| ATOM | 1979 | HA CYX   | 126 | 13.650 | -0.486 | -6.994 | 1.00 | 0.00 |
| ATOM | 1980 | CB CYX   | 126 | 12.412 | 0.914  | -5.945 | 1.00 | 0.00 |
| ATOM | 1981 | HB2 CYX  | 126 | 12.477 | 1.939  | -5.582 | 1.00 | 0.00 |

|      |      |     |     |     |        |         |         |      |      |
|------|------|-----|-----|-----|--------|---------|---------|------|------|
| ATOM | 1982 | HB3 | CYX | 126 | 11.538 | 0.810   | -6.587  | 1.00 | 0.00 |
| ATOM | 1983 | SG  | CYX | 126 | 12.296 | -0.175  | -4.505  | 1.00 | 0.00 |
| ATOM | 1984 | C   | CYX | 126 | 13.707 | 1.406   | -8.025  | 1.00 | 0.00 |
| ATOM | 1985 | O   | CYX | 126 | 13.101 | 1.056   | -9.019  | 1.00 | 0.00 |
| ATOM | 1986 | N   | SER | 127 | 14.412 | 2.503   | -8.013  | 1.00 | 0.00 |
| ATOM | 1987 | H   | SER | 127 | 14.920 | 2.797   | -7.191  | 1.00 | 0.00 |
| ATOM | 1988 | CA  | SER | 127 | 14.486 | 3.356   | -9.232  | 1.00 | 0.00 |
| ATOM | 1989 | HA  | SER | 127 | 15.159 | 4.197   | -9.065  | 1.00 | 0.00 |
| ATOM | 1990 | CB  | SER | 127 | 15.020 | 2.528   | -10.403 | 1.00 | 0.00 |
| ATOM | 1991 | HB2 | SER | 127 | 16.100 | 2.655   | -10.476 | 1.00 | 0.00 |
| ATOM | 1992 | HB3 | SER | 127 | 14.790 | 1.475   | -10.239 | 1.00 | 0.00 |
| ATOM | 1993 | OG  | SER | 127 | 14.410 | 2.963   | -11.609 | 1.00 | 0.00 |
| ATOM | 1994 | HG  | SER | 127 | 14.746 | 2.443   | -12.343 | 1.00 | 0.00 |
| ATOM | 1995 | C   | SER | 127 | 13.088 | 3.878   | -9.575  | 1.00 | 0.00 |
| ATOM | 1996 | O   | SER | 127 | 12.139 | 3.416   | -8.964  | 1.00 | 0.00 |
| ATOM | 1997 | OXT | SER | 127 | 12.992 | 4.733   | -10.440 | 1.00 | 0.00 |
| TER  |      |     |     |     |        |         |         |      |      |
| ATOM | 1998 | S1  | LIG | 128 | 4.851  | -17.007 | -8.477  | 1.00 | 0.00 |
| ATOM | 1999 | O1  | LIG | 128 | 7.543  | -19.357 | -5.587  | 1.00 | 0.00 |
| ATOM | 2000 | O2  | LIG | 128 | 3.791  | -15.763 | -8.583  | 1.00 | 0.00 |
| ATOM | 2001 | O3  | LIG | 128 | 6.346  | -16.882 | -9.112  | 1.00 | 0.00 |
| ATOM | 2002 | N1  | LIG | 128 | 4.971  | -17.164 | -6.629  | 1.00 | 0.00 |

|      |      |     |     |     |       |         |         |      |      |
|------|------|-----|-----|-----|-------|---------|---------|------|------|
| ATOM | 2003 | H1  | LIG | 128 | 4.624 | -16.294 | -6.233  | 1.00 | 0.00 |
| ATOM | 2004 | N2  | LIG | 128 | 6.492 | -18.969 | -6.524  | 1.00 | 0.00 |
| ATOM | 2005 | N3  | LIG | 128 | 2.139 | -21.970 | -10.480 | 1.00 | 0.00 |
| ATOM | 2006 | H10 | LIG | 128 | 1.167 | -21.957 | -10.740 | 1.00 | 0.00 |
| ATOM | 2007 | H11 | LIG | 128 | 2.639 | -22.836 | -10.579 | 1.00 | 0.00 |
| ATOM | 2008 | C1  | LIG | 128 | 4.029 | -18.557 | -9.060  | 1.00 | 0.00 |
| ATOM | 2009 | C2  | LIG | 128 | 2.680 | -18.479 | -9.402  | 1.00 | 0.00 |
| ATOM | 2010 | H2  | LIG | 128 | 2.150 | -17.538 | -9.305  | 1.00 | 0.00 |
| ATOM | 2011 | C3  | LIG | 128 | 4.773 | -19.731 | -9.175  | 1.00 | 0.00 |
| ATOM | 2012 | H3  | LIG | 128 | 5.813 | -19.759 | -8.874  | 1.00 | 0.00 |
| ATOM | 2013 | C4  | LIG | 128 | 6.008 | -17.835 | -6.009  | 1.00 | 0.00 |
| ATOM | 2014 | C5  | LIG | 128 | 2.764 | -20.838 | -10.009 | 1.00 | 0.00 |
| ATOM | 2015 | C6  | LIG | 128 | 2.048 | -19.623 | -9.878  | 1.00 | 0.00 |
| ATOM | 2016 | H4  | LIG | 128 | 1.000 | -19.585 | -10.154 | 1.00 | 0.00 |
| ATOM | 2017 | C7  | LIG | 128 | 4.133 | -20.872 | -9.649  | 1.00 | 0.00 |
| ATOM | 2018 | H5  | LIG | 128 | 4.689 | -21.799 | -9.740  | 1.00 | 0.00 |
| ATOM | 2019 | C8  | LIG | 128 | 6.658 | -17.460 | -4.783  | 1.00 | 0.00 |
| ATOM | 2020 | H6  | LIG | 128 | 6.453 | -16.591 | -4.180  | 1.00 | 0.00 |
| ATOM | 2021 | C9  | LIG | 128 | 7.590 | -18.432 | -4.560  | 1.00 | 0.00 |
| ATOM | 2022 | C10 | LIG | 128 | 8.601 | -18.664 | -3.495  | 1.00 | 0.00 |
| ATOM | 2023 | H7  | LIG | 128 | 8.554 | -17.870 | -2.746  | 1.00 | 0.00 |
| ATOM | 2024 | H8  | LIG | 128 | 8.430 | -19.625 | -2.997  | 1.00 | 0.00 |

|      |      |    |     |     |       |         |        |      |      |
|------|------|----|-----|-----|-------|---------|--------|------|------|
| ATOM | 2025 | H9 | LIG | 128 | 9.611 | -18.688 | -3.917 | 1.00 | 0.00 |
|------|------|----|-----|-----|-------|---------|--------|------|------|

TER

|      |      |    |     |     |         |        |       |      |      |
|------|------|----|-----|-----|---------|--------|-------|------|------|
| ATOM | 2026 | S1 | LIG | 129 | -22.795 | 12.903 | 5.186 | 1.00 | 0.00 |
|------|------|----|-----|-----|---------|--------|-------|------|------|

|      |      |    |     |     |         |        |       |      |      |
|------|------|----|-----|-----|---------|--------|-------|------|------|
| ATOM | 2027 | O1 | LIG | 129 | -20.160 | 16.436 | 6.489 | 1.00 | 0.00 |
|------|------|----|-----|-----|---------|--------|-------|------|------|

|      |      |    |     |     |         |        |       |      |      |
|------|------|----|-----|-----|---------|--------|-------|------|------|
| ATOM | 2028 | O2 | LIG | 129 | -23.641 | 12.276 | 3.932 | 1.00 | 0.00 |
|------|------|----|-----|-----|---------|--------|-------|------|------|

|      |      |    |     |     |         |        |       |      |      |
|------|------|----|-----|-----|---------|--------|-------|------|------|
| ATOM | 2029 | O3 | LIG | 129 | -21.398 | 12.219 | 5.672 | 1.00 | 0.00 |
|------|------|----|-----|-----|---------|--------|-------|------|------|

|      |      |    |     |     |         |        |       |      |      |
|------|------|----|-----|-----|---------|--------|-------|------|------|
| ATOM | 2030 | N1 | LIG | 129 | -22.454 | 14.604 | 4.517 | 1.00 | 0.00 |
|------|------|----|-----|-----|---------|--------|-------|------|------|

|      |      |    |     |     |         |        |       |      |      |
|------|------|----|-----|-----|---------|--------|-------|------|------|
| ATOM | 2031 | H1 | LIG | 129 | -22.597 | 14.563 | 3.511 | 1.00 | 0.00 |
|------|------|----|-----|-----|---------|--------|-------|------|------|

|      |      |    |     |     |         |        |       |      |      |
|------|------|----|-----|-----|---------|--------|-------|------|------|
| ATOM | 2032 | N2 | LIG | 129 | -21.249 | 15.473 | 6.354 | 1.00 | 0.00 |
|------|------|----|-----|-----|---------|--------|-------|------|------|

|      |      |    |     |     |         |        |       |      |      |
|------|------|----|-----|-----|---------|--------|-------|------|------|
| ATOM | 2033 | N3 | LIG | 129 | -26.529 | 13.568 | 9.834 | 1.00 | 0.00 |
|------|------|----|-----|-----|---------|--------|-------|------|------|

|      |      |     |     |     |         |        |       |      |      |
|------|------|-----|-----|-----|---------|--------|-------|------|------|
| ATOM | 2034 | H10 | LIG | 129 | -27.511 | 13.375 | 9.738 | 1.00 | 0.00 |
|------|------|-----|-----|-----|---------|--------|-------|------|------|

|      |      |     |     |     |         |        |        |      |      |
|------|------|-----|-----|-----|---------|--------|--------|------|------|
| ATOM | 2035 | H11 | LIG | 129 | -26.194 | 13.863 | 10.736 | 1.00 | 0.00 |
|------|------|-----|-----|-----|---------|--------|--------|------|------|

|      |      |    |     |     |         |        |       |      |      |
|------|------|----|-----|-----|---------|--------|-------|------|------|
| ATOM | 2036 | C1 | LIG | 129 | -23.930 | 13.148 | 6.624 | 1.00 | 0.00 |
|------|------|----|-----|-----|---------|--------|-------|------|------|

|      |      |    |     |     |         |        |       |      |      |
|------|------|----|-----|-----|---------|--------|-------|------|------|
| ATOM | 2037 | C2 | LIG | 129 | -25.282 | 12.868 | 6.429 | 1.00 | 0.00 |
|------|------|----|-----|-----|---------|--------|-------|------|------|

|      |      |    |     |     |         |        |       |      |      |
|------|------|----|-----|-----|---------|--------|-------|------|------|
| ATOM | 2038 | H2 | LIG | 129 | -25.633 | 12.537 | 5.458 | 1.00 | 0.00 |
|------|------|----|-----|-----|---------|--------|-------|------|------|

|      |      |    |     |     |         |        |       |      |      |
|------|------|----|-----|-----|---------|--------|-------|------|------|
| ATOM | 2039 | C3 | LIG | 129 | -23.411 | 13.561 | 7.850 | 1.00 | 0.00 |
|------|------|----|-----|-----|---------|--------|-------|------|------|

|      |      |    |     |     |         |        |       |      |      |
|------|------|----|-----|-----|---------|--------|-------|------|------|
| ATOM | 2040 | H3 | LIG | 129 | -22.359 | 13.795 | 7.955 | 1.00 | 0.00 |
|------|------|----|-----|-----|---------|--------|-------|------|------|

|      |      |    |     |     |         |        |       |      |      |
|------|------|----|-----|-----|---------|--------|-------|------|------|
| ATOM | 2041 | C4 | LIG | 129 | -21.467 | 15.419 | 5.037 | 1.00 | 0.00 |
|------|------|----|-----|-----|---------|--------|-------|------|------|

|      |      |    |     |     |         |        |       |      |      |
|------|------|----|-----|-----|---------|--------|-------|------|------|
| ATOM | 2042 | C5 | LIG | 129 | -25.668 | 13.429 | 8.769 | 1.00 | 0.00 |
|------|------|----|-----|-----|---------|--------|-------|------|------|

|      |      |    |     |     |         |        |       |      |      |
|------|------|----|-----|-----|---------|--------|-------|------|------|
| ATOM | 2043 | C6 | LIG | 129 | -26.151 | 13.009 | 7.506 | 1.00 | 0.00 |
|------|------|----|-----|-----|---------|--------|-------|------|------|

|      |      |    |     |     |         |        |       |      |      |
|------|------|----|-----|-----|---------|--------|-------|------|------|
| ATOM | 2044 | H4 | LIG | 129 | -27.207 | 12.792 | 7.378 | 1.00 | 0.00 |
|------|------|----|-----|-----|---------|--------|-------|------|------|

|      |      |    |     |     |         |        |       |      |      |
|------|------|----|-----|-----|---------|--------|-------|------|------|
| ATOM | 2045 | C7 | LIG | 129 | -24.287 | 13.703 | 8.921 | 1.00 | 0.00 |
|------|------|----|-----|-----|---------|--------|-------|------|------|

|      |      |     |     |     |         |        |       |      |      |
|------|------|-----|-----|-----|---------|--------|-------|------|------|
| ATOM | 2046 | H5  | LIG | 129 | -23.908 | 14.031 | 9.883 | 1.00 | 0.00 |
| ATOM | 2047 | C8  | LIG | 129 | -20.605 | 16.299 | 4.296 | 1.00 | 0.00 |
| ATOM | 2048 | H6  | LIG | 129 | -20.582 | 16.435 | 3.227 | 1.00 | 0.00 |
| ATOM | 2049 | C9  | LIG | 129 | -19.823 | 16.909 | 5.234 | 1.00 | 0.00 |
| ATOM | 2050 | C10 | LIG | 129 | -18.730 | 17.914 | 5.167 | 1.00 | 0.00 |
| ATOM | 2051 | H7  | LIG | 129 | -18.545 | 18.207 | 4.131 | 1.00 | 0.00 |
| ATOM | 2052 | H8  | LIG | 129 | -18.988 | 18.810 | 5.743 | 1.00 | 0.00 |
| ATOM | 2053 | H9  | LIG | 129 | -17.804 | 17.509 | 5.587 | 1.00 | 0.00 |

TER

|      |      |     |     |     |        |         |        |      |      |
|------|------|-----|-----|-----|--------|---------|--------|------|------|
| ATOM | 2054 | S1  | LIG | 130 | 20.721 | -12.623 | 25.901 | 1.00 | 0.00 |
| ATOM | 2055 | O1  | LIG | 130 | 23.615 | -9.507  | 27.644 | 1.00 | 0.00 |
| ATOM | 2056 | O2  | LIG | 130 | 19.818 | -13.940 | 26.267 | 1.00 | 0.00 |
| ATOM | 2057 | O3  | LIG | 130 | 20.012 | -11.188 | 25.598 | 1.00 | 0.00 |
| ATOM | 2058 | N1  | LIG | 130 | 21.739 | -12.499 | 27.452 | 1.00 | 0.00 |
| ATOM | 2059 | H1  | LIG | 130 | 21.261 | -13.043 | 28.166 | 1.00 | 0.00 |
| ATOM | 2060 | N2  | LIG | 130 | 23.028 | -10.604 | 26.879 | 1.00 | 0.00 |
| ATOM | 2061 | N3  | LIG | 130 | 24.476 | -14.085 | 21.458 | 1.00 | 0.00 |
| ATOM | 2062 | H10 | LIG | 130 | 24.526 | -15.029 | 21.115 | 1.00 | 0.00 |
| ATOM | 2063 | H11 | LIG | 130 | 25.067 | -13.396 | 21.023 | 1.00 | 0.00 |
| ATOM | 2064 | C1  | LIG | 130 | 21.910 | -13.056 | 24.554 | 1.00 | 0.00 |
| ATOM | 2065 | C2  | LIG | 130 | 21.937 | -14.381 | 24.123 | 1.00 | 0.00 |
| ATOM | 2066 | H2  | LIG | 130 | 21.288 | -15.116 | 24.586 | 1.00 | 0.00 |

|      |      |     |     |     |        |         |        |      |      |
|------|------|-----|-----|-----|--------|---------|--------|------|------|
| ATOM | 2067 | C3  | LIG | 130 | 22.706 | -12.060 | 23.990 | 1.00 | 0.00 |
| ATOM | 2068 | H3  | LIG | 130 | 22.676 | -11.046 | 24.371 | 1.00 | 0.00 |
| ATOM | 2069 | C4  | LIG | 130 | 22.412 | -11.345 | 27.805 | 1.00 | 0.00 |
| ATOM | 2070 | C5  | LIG | 130 | 23.626 | -13.745 | 22.485 | 1.00 | 0.00 |
| ATOM | 2071 | C6  | LIG | 130 | 22.797 | -14.724 | 23.085 | 1.00 | 0.00 |
| ATOM | 2072 | H4  | LIG | 130 | 22.831 | -15.749 | 22.730 | 1.00 | 0.00 |
| ATOM | 2073 | C7  | LIG | 130 | 23.566 | -12.411 | 22.956 | 1.00 | 0.00 |
| ATOM | 2074 | H5  | LIG | 130 | 24.201 | -11.654 | 22.506 | 1.00 | 0.00 |
| ATOM | 2075 | C8  | LIG | 130 | 22.569 | -10.818 | 29.132 | 1.00 | 0.00 |
| ATOM | 2076 | H6  | LIG | 130 | 22.168 | -11.227 | 30.045 | 1.00 | 0.00 |
| ATOM | 2077 | C9  | LIG | 130 | 23.324 | -9.690  | 28.983 | 1.00 | 0.00 |
| ATOM | 2078 | C10 | LIG | 130 | 23.848 | -8.670  | 29.928 | 1.00 | 0.00 |
| ATOM | 2079 | H7  | LIG | 130 | 23.551 | -8.910  | 30.952 | 1.00 | 0.00 |
| ATOM | 2080 | H8  | LIG | 130 | 24.942 | -8.622  | 29.884 | 1.00 | 0.00 |
| ATOM | 2081 | H9  | LIG | 130 | 23.466 | -7.675  | 29.677 | 1.00 | 0.00 |
| TER  |      |     |     |     |        |         |        |      |      |
| ATOM | 2082 | S1  | LIG | 131 | 22.268 | 20.755  | 1.311  | 1.00 | 0.00 |
| ATOM | 2083 | O1  | LIG | 131 | 26.799 | 21.047  | 2.029  | 1.00 | 0.00 |
| ATOM | 2084 | O2  | LIG | 131 | 20.837 | 21.507  | 1.569  | 1.00 | 0.00 |
| ATOM | 2085 | O3  | LIG | 131 | 22.926 | 20.708  | -0.179 | 1.00 | 0.00 |
| ATOM | 2086 | N1  | LIG | 131 | 23.357 | 21.752  | 2.440  | 1.00 | 0.00 |
| ATOM | 2087 | H1  | LIG | 131 | 22.865 | 22.619  | 2.639  | 1.00 | 0.00 |



|      |      |     |     |     |        |        |       |      |      |
|------|------|-----|-----|-----|--------|--------|-------|------|------|
| ATOM | 2088 | N2  | LIG | 131 | 25.399 | 20.631 | 2.047 | 1.00 | 0.00 |
| ATOM | 2089 | N3  | LIG | 131 | 21.942 | 15.231 | 3.628 | 1.00 | 0.00 |
| ATOM | 2090 | H10 | LIG | 131 | 21.130 | 14.935 | 4.142 | 1.00 | 0.00 |
| ATOM | 2091 | H11 | LIG | 131 | 22.688 | 14.567 | 3.506 | 1.00 | 0.00 |
| ATOM | 2092 | C1  | LIG | 131 | 22.206 | 19.059 | 2.044 | 1.00 | 0.00 |
| ATOM | 2093 | C2  | LIG | 131 | 21.056 | 18.707 | 2.749 | 1.00 | 0.00 |
| ATOM | 2094 | H2  | LIG | 131 | 20.250 | 19.422 | 2.865 | 1.00 | 0.00 |
| ATOM | 2095 | C3  | LIG | 131 | 23.271 | 18.182 | 1.845 | 1.00 | 0.00 |
| ATOM | 2096 | H3  | LIG | 131 | 24.159 | 18.501 | 1.314 | 1.00 | 0.00 |
| ATOM | 2097 | C4  | LIG | 131 | 24.734 | 21.755 | 2.328 | 1.00 | 0.00 |
| ATOM | 2098 | C5  | LIG | 131 | 22.029 | 16.500 | 3.104 | 1.00 | 0.00 |
| ATOM | 2099 | C6  | LIG | 131 | 20.969 | 17.423 | 3.279 | 1.00 | 0.00 |
| ATOM | 2100 | H4  | LIG | 131 | 20.082 | 17.126 | 3.828 | 1.00 | 0.00 |
| ATOM | 2101 | C7  | LIG | 131 | 23.178 | 16.902 | 2.381 | 1.00 | 0.00 |
| ATOM | 2102 | H5  | LIG | 131 | 23.998 | 16.203 | 2.245 | 1.00 | 0.00 |
| ATOM | 2103 | C8  | LIG | 131 | 25.606 | 22.883 | 2.515 | 1.00 | 0.00 |
| ATOM | 2104 | H6  | LIG | 131 | 25.316 | 23.895 | 2.745 | 1.00 | 0.00 |
| ATOM | 2105 | C9  | LIG | 131 | 26.867 | 22.396 | 2.329 | 1.00 | 0.00 |
| ATOM | 2106 | C10 | LIG | 131 | 28.222 | 23.005 | 2.367 | 1.00 | 0.00 |
| ATOM | 2107 | H7  | LIG | 131 | 28.154 | 24.070 | 2.602 | 1.00 | 0.00 |
| ATOM | 2108 | H8  | LIG | 131 | 28.848 | 22.519 | 3.123 | 1.00 | 0.00 |
| ATOM | 2109 | H9  | LIG | 131 | 28.726 | 22.892 | 1.401 | 1.00 | 0.00 |

TER

|      |      |     |     |     |         |         |        |      |      |
|------|------|-----|-----|-----|---------|---------|--------|------|------|
| ATOM | 2110 | S1  | LIG | 132 | -24.352 | -18.224 | -5.124 | 1.00 | 0.00 |
| ATOM | 2111 | O1  | LIG | 132 | -24.092 | -21.879 | -2.350 | 1.00 | 0.00 |
| ATOM | 2112 | O2  | LIG | 132 | -23.706 | -16.752 | -5.437 | 1.00 | 0.00 |
| ATOM | 2113 | O3  | LIG | 132 | -24.078 | -19.481 | -6.124 | 1.00 | 0.00 |
| ATOM | 2114 | N1  | LIG | 132 | -23.576 | -18.564 | -3.470 | 1.00 | 0.00 |
| ATOM | 2115 | H1  | LIG | 132 | -22.780 | -17.937 | -3.380 | 1.00 | 0.00 |
| ATOM | 2116 | N2  | LIG | 132 | -24.540 | -20.680 | -3.053 | 1.00 | 0.00 |
| ATOM | 2117 | N3  | LIG | 132 | -30.238 | -17.539 | -4.186 | 1.00 | 0.00 |
| ATOM | 2118 | H10 | LIG | 132 | -30.653 | -16.624 | -4.164 | 1.00 | 0.00 |
| ATOM | 2119 | H11 | LIG | 132 | -30.843 | -18.332 | -4.057 | 1.00 | 0.00 |
| ATOM | 2120 | C1  | LIG | 132 | -26.162 | -18.037 | -4.800 | 1.00 | 0.00 |
| ATOM | 2121 | C2  | LIG | 132 | -26.680 | -16.743 | -4.778 | 1.00 | 0.00 |
| ATOM | 2122 | H2  | LIG | 132 | -26.025 | -15.894 | -4.931 | 1.00 | 0.00 |
| ATOM | 2123 | C3  | LIG | 132 | -26.952 | -19.172 | -4.627 | 1.00 | 0.00 |
| ATOM | 2124 | H3  | LIG | 132 | -26.509 | -20.160 | -4.624 | 1.00 | 0.00 |
| ATOM | 2125 | C4  | LIG | 132 | -23.514 | -19.834 | -2.929 | 1.00 | 0.00 |
| ATOM | 2126 | C5  | LIG | 132 | -28.887 | -17.703 | -4.389 | 1.00 | 0.00 |
| ATOM | 2127 | C6  | LIG | 132 | -28.046 | -16.578 | -4.573 | 1.00 | 0.00 |
| ATOM | 2128 | H4  | LIG | 132 | -28.472 | -15.580 | -4.556 | 1.00 | 0.00 |
| ATOM | 2129 | C7  | LIG | 132 | -28.317 | -18.999 | -4.418 | 1.00 | 0.00 |
| ATOM | 2130 | H5  | LIG | 132 | -28.951 | -19.868 | -4.273 | 1.00 | 0.00 |

|      |      |     |     |     |         |         |         |      |      |
|------|------|-----|-----|-----|---------|---------|---------|------|------|
| ATOM | 2131 | C8  | LIG | 132 | -22.425 | -20.390 | -2.173  | 1.00 | 0.00 |
| ATOM | 2132 | H6  | LIG | 132 | -21.489 | -19.912 | -1.937  | 1.00 | 0.00 |
| ATOM | 2133 | C9  | LIG | 132 | -22.831 | -21.647 | -1.832  | 1.00 | 0.00 |
| ATOM | 2134 | C10 | LIG | 132 | -22.206 | -22.759 | -1.069  | 1.00 | 0.00 |
| ATOM | 2135 | H7  | LIG | 132 | -21.213 | -22.469 | -0.717  | 1.00 | 0.00 |
| ATOM | 2136 | H8  | LIG | 132 | -22.819 | -23.031 | -0.202  | 1.00 | 0.00 |
| ATOM | 2137 | H9  | LIG | 132 | -22.108 | -23.653 | -1.694  | 1.00 | 0.00 |
| TER  |      |     |     |     |         |         |         |      |      |
| ATOM | 2138 | S1  | LIG | 133 | 24.500  | 9.695   | -22.044 | 1.00 | 0.00 |
| ATOM | 2139 | O1  | LIG | 133 | 23.211  | 12.519  | -25.433 | 1.00 | 0.00 |
| ATOM | 2140 | O2  | LIG | 133 | 25.774  | 9.219   | -21.131 | 1.00 | 0.00 |
| ATOM | 2141 | O3  | LIG | 133 | 23.306  | 10.596  | -21.398 | 1.00 | 0.00 |
| ATOM | 2142 | N1  | LIG | 133 | 25.393  | 10.683  | -23.340 | 1.00 | 0.00 |
| ATOM | 2143 | H1  | LIG | 133 | 26.313  | 10.903  | -22.967 | 1.00 | 0.00 |
| ATOM | 2144 | N2  | LIG | 133 | 23.528  | 11.338  | -24.635 | 1.00 | 0.00 |
| ATOM | 2145 | N3  | LIG | 133 | 22.230  | 4.865   | -24.783 | 1.00 | 0.00 |
| ATOM | 2146 | H10 | LIG | 133 | 22.676  | 3.968   | -24.699 | 1.00 | 0.00 |
| ATOM | 2147 | H11 | LIG | 133 | 21.388  | 4.921   | -25.331 | 1.00 | 0.00 |
| ATOM | 2148 | C1  | LIG | 133 | 23.800  | 8.229   | -22.924 | 1.00 | 0.00 |
| ATOM | 2149 | C2  | LIG | 133 | 24.464  | 7.012   | -22.773 | 1.00 | 0.00 |
| ATOM | 2150 | H2  | LIG | 133 | 25.363  | 6.956   | -22.171 | 1.00 | 0.00 |
| ATOM | 2151 | C3  | LIG | 133 | 22.631  | 8.366   | -23.671 | 1.00 | 0.00 |

|      |      |     |     |     |         |        |         |      |      |
|------|------|-----|-----|-----|---------|--------|---------|------|------|
| ATOM | 2152 | H3  | LIG | 133 | 22.159  | 9.334  | -23.788 | 1.00 | 0.00 |
| ATOM | 2153 | C4  | LIG | 133 | 24.746  | 11.597 | -24.150 | 1.00 | 0.00 |
| ATOM | 2154 | C5  | LIG | 133 | 22.752  | 5.980  | -24.167 | 1.00 | 0.00 |
| ATOM | 2155 | C6  | LIG | 133 | 23.936  | 5.886  | -23.396 | 1.00 | 0.00 |
| ATOM | 2156 | H4  | LIG | 133 | 24.433  | 4.928  | -23.289 | 1.00 | 0.00 |
| ATOM | 2157 | C7  | LIG | 133 | 22.111  | 7.236  | -24.295 | 1.00 | 0.00 |
| ATOM | 2158 | H5  | LIG | 133 | 21.206  | 7.320  | -24.888 | 1.00 | 0.00 |
| ATOM | 2159 | C8  | LIG | 133 | 25.261  | 12.865 | -24.592 | 1.00 | 0.00 |
| ATOM | 2160 | H6  | LIG | 133 | 26.213  | 13.301 | -24.339 | 1.00 | 0.00 |
| ATOM | 2161 | C9  | LIG | 133 | 24.283  | 13.391 | -25.385 | 1.00 | 0.00 |
| ATOM | 2162 | C10 | LIG | 133 | 24.150  | 14.659 | -26.151 | 1.00 | 0.00 |
| ATOM | 2163 | H7  | LIG | 133 | 25.048  | 15.271 | -26.034 | 1.00 | 0.00 |
| ATOM | 2164 | H8  | LIG | 133 | 24.002  | 14.457 | -27.218 | 1.00 | 0.00 |
| ATOM | 2165 | H9  | LIG | 133 | 23.286  | 15.235 | -25.802 | 1.00 | 0.00 |
| TER  |      |     |     |     |         |        |         |      |      |
| ATOM | 2166 | S1  | LIG | 134 | -25.324 | -0.420 | 27.128  | 1.00 | 0.00 |
| ATOM | 2167 | O1  | LIG | 134 | -25.774 | -2.534 | 23.072  | 1.00 | 0.00 |
| ATOM | 2168 | O2  | LIG | 134 | -24.254 | -0.028 | 28.304  | 1.00 | 0.00 |
| ATOM | 2169 | O3  | LIG | 134 | -25.918 | 0.724  | 26.130  | 1.00 | 0.00 |
| ATOM | 2170 | N1  | LIG | 134 | -24.295 | -1.622 | 26.153  | 1.00 | 0.00 |
| ATOM | 2171 | H1  | LIG | 134 | -23.326 | -1.466 | 26.415  | 1.00 | 0.00 |
| ATOM | 2172 | N2  | LIG | 134 | -25.874 | -2.168 | 24.482  | 1.00 | 0.00 |

|      |      |     |     |     |         |        |        |      |      |
|------|------|-----|-----|-----|---------|--------|--------|------|------|
| ATOM | 2173 | N3  | LIG | 134 | -29.794 | -3.556 | 29.612 | 1.00 | 0.00 |
| ATOM | 2174 | H10 | LIG | 134 | -29.762 | -3.818 | 30.582 | 1.00 | 0.00 |
| ATOM | 2175 | H11 | LIG | 134 | -30.603 | -3.827 | 29.079 | 1.00 | 0.00 |
| ATOM | 2176 | C1  | LIG | 134 | -26.698 | -1.415 | 27.862 | 1.00 | 0.00 |
| ATOM | 2177 | C2  | LIG | 134 | -26.596 | -1.752 | 29.211 | 1.00 | 0.00 |
| ATOM | 2178 | H2  | LIG | 134 | -25.728 | -1.445 | 29.782 | 1.00 | 0.00 |
| ATOM | 2179 | C3  | LIG | 134 | -27.794 | -1.764 | 27.074 | 1.00 | 0.00 |
| ATOM | 2180 | H3  | LIG | 134 | -27.824 | -1.507 | 26.023 | 1.00 | 0.00 |
| ATOM | 2181 | C4  | LIG | 134 | -24.605 | -1.978 | 24.854 | 1.00 | 0.00 |
| ATOM | 2182 | C5  | LIG | 134 | -28.767 | -2.847 | 29.033 | 1.00 | 0.00 |
| ATOM | 2183 | C6  | LIG | 134 | -27.635 | -2.469 | 29.796 | 1.00 | 0.00 |
| ATOM | 2184 | H4  | LIG | 134 | -27.580 | -2.738 | 30.845 | 1.00 | 0.00 |
| ATOM | 2185 | C7  | LIG | 134 | -28.826 | -2.484 | 27.665 | 1.00 | 0.00 |
| ATOM | 2186 | H5  | LIG | 134 | -29.687 | -2.773 | 27.070 | 1.00 | 0.00 |
| ATOM | 2187 | C8  | LIG | 134 | -23.673 | -2.214 | 23.785 | 1.00 | 0.00 |
| ATOM | 2188 | H6  | LIG | 134 | -22.600 | -2.126 | 23.830 | 1.00 | 0.00 |
| ATOM | 2189 | C9  | LIG | 134 | -24.440 | -2.562 | 22.711 | 1.00 | 0.00 |
| ATOM | 2190 | C10 | LIG | 134 | -24.134 | -2.926 | 21.303 | 1.00 | 0.00 |
| ATOM | 2191 | H7  | LIG | 134 | -23.055 | -2.906 | 21.130 | 1.00 | 0.00 |
| ATOM | 2192 | H8  | LIG | 134 | -24.507 | -3.930 | 21.069 | 1.00 | 0.00 |
| ATOM | 2193 | H9  | LIG | 134 | -24.613 | -2.228 | 20.608 | 1.00 | 0.00 |

TER

|      |      |     |     |     |         |        |         |      |      |
|------|------|-----|-----|-----|---------|--------|---------|------|------|
| ATOM | 2194 | S1  | LIG | 135 | -23.036 | 14.043 | -26.967 | 1.00 | 0.00 |
| ATOM | 2195 | O1  | LIG | 135 | -26.148 | 14.996 | -23.721 | 1.00 | 0.00 |
| ATOM | 2196 | O2  | LIG | 135 | -22.019 | 14.713 | -28.062 | 1.00 | 0.00 |
| ATOM | 2197 | O3  | LIG | 135 | -22.457 | 13.334 | -25.619 | 1.00 | 0.00 |
| ATOM | 2198 | N1  | LIG | 135 | -24.031 | 15.543 | -26.502 | 1.00 | 0.00 |
| ATOM | 2199 | H1  | LIG | 135 | -23.496 | 16.357 | -26.793 | 1.00 | 0.00 |
| ATOM | 2200 | N2  | LIG | 135 | -25.486 | 14.533 | -24.938 | 1.00 | 0.00 |
| ATOM | 2201 | N3  | LIG | 135 | -26.740 | 10.319 | -29.865 | 1.00 | 0.00 |
| ATOM | 2202 | H10 | LIG | 135 | -26.717 | 10.246 | -30.867 | 1.00 | 0.00 |
| ATOM | 2203 | H11 | LIG | 135 | -27.394 | 9.739  | -29.367 | 1.00 | 0.00 |
| ATOM | 2204 | C1  | LIG | 135 | -24.210 | 12.913 | -27.839 | 1.00 | 0.00 |
| ATOM | 2205 | C2  | LIG | 135 | -24.134 | 12.858 | -29.230 | 1.00 | 0.00 |
| ATOM | 2206 | H2  | LIG | 135 | -23.418 | 13.475 | -29.759 | 1.00 | 0.00 |
| ATOM | 2207 | C3  | LIG | 135 | -25.098 | 12.135 | -27.097 | 1.00 | 0.00 |
| ATOM | 2208 | H3  | LIG | 135 | -25.146 | 12.226 | -26.019 | 1.00 | 0.00 |
| ATOM | 2209 | C4  | LIG | 135 | -24.792 | 15.598 | -25.350 | 1.00 | 0.00 |
| ATOM | 2210 | C5  | LIG | 135 | -25.902 | 11.179 | -29.194 | 1.00 | 0.00 |
| ATOM | 2211 | C6  | LIG | 135 | -24.982 | 11.987 | -29.907 | 1.00 | 0.00 |
| ATOM | 2212 | H4  | LIG | 135 | -24.937 | 11.924 | -30.989 | 1.00 | 0.00 |
| ATOM | 2213 | C7  | LIG | 135 | -25.945 | 11.270 | -27.782 | 1.00 | 0.00 |
| ATOM | 2214 | H5  | LIG | 135 | -26.650 | 10.659 | -27.227 | 1.00 | 0.00 |
| ATOM | 2215 | C8  | LIG | 135 | -24.968 | 16.740 | -24.494 | 1.00 | 0.00 |

|      |      |     |     |     |         |        |         |      |      |
|------|------|-----|-----|-----|---------|--------|---------|------|------|
| ATOM | 2216 | H6  | LIG | 135 | -24.515 | 17.711 | -24.608 | 1.00 | 0.00 |
| ATOM | 2217 | C9  | LIG | 135 | -25.817 | 16.322 | -23.510 | 1.00 | 0.00 |
| ATOM | 2218 | C10 | LIG | 135 | -26.407 | 16.978 | -22.313 | 1.00 | 0.00 |
| ATOM | 2219 | H7  | LIG | 135 | -26.071 | 18.015 | -22.242 | 1.00 | 0.00 |
| ATOM | 2220 | H8  | LIG | 135 | -27.502 | 16.968 | -22.362 | 1.00 | 0.00 |
| ATOM | 2221 | H9  | LIG | 135 | -26.114 | 16.451 | -21.398 | 1.00 | 0.00 |
| TER  |      |     |     |     |         |        |         |      |      |
| ATOM | 2222 | S1  | LIG | 136 | -4.077  | 6.496  | -24.989 | 1.00 | 0.00 |
| ATOM | 2223 | O1  | LIG | 136 | -0.556  | 4.513  | -27.180 | 1.00 | 0.00 |
| ATOM | 2224 | O2  | LIG | 136 | -4.546  | 7.158  | -23.567 | 1.00 | 0.00 |
| ATOM | 2225 | O3  | LIG | 136 | -3.827  | 7.431  | -26.299 | 1.00 | 0.00 |
| ATOM | 2226 | N1  | LIG | 136 | -2.471  | 5.722  | -24.462 | 1.00 | 0.00 |
| ATOM | 2227 | H1  | LIG | 136 | -2.198  | 6.166  | -23.590 | 1.00 | 0.00 |
| ATOM | 2228 | N2  | LIG | 136 | -1.839  | 4.772  | -26.531 | 1.00 | 0.00 |
| ATOM | 2229 | N3  | LIG | 136 | -7.831  | 2.006  | -26.308 | 1.00 | 0.00 |
| ATOM | 2230 | H10 | LIG | 136 | -8.550  | 1.729  | -25.661 | 1.00 | 0.00 |
| ATOM | 2231 | H11 | LIG | 136 | -7.773  | 1.515  | -27.183 | 1.00 | 0.00 |
| ATOM | 2232 | C1  | LIG | 136 | -5.200  | 5.088  | -25.404 | 1.00 | 0.00 |
| ATOM | 2233 | C2  | LIG | 136 | -6.174  | 4.746  | -24.467 | 1.00 | 0.00 |
| ATOM | 2234 | H2  | LIG | 136 | -6.240  | 5.288  | -23.531 | 1.00 | 0.00 |
| ATOM | 2235 | C3  | LIG | 136 | -5.071  | 4.441  | -26.632 | 1.00 | 0.00 |
| ATOM | 2236 | H3  | LIG | 136 | -4.284  | 4.718  | -27.323 | 1.00 | 0.00 |

|      |      |     |     |     |         |         |         |      |      |
|------|------|-----|-----|-----|---------|---------|---------|------|------|
| ATOM | 2237 | C4  | LIG | 136 | -1.501  | 5.339   | -25.369 | 1.00 | 0.00 |
| ATOM | 2238 | C5  | LIG | 136 | -6.959  | 3.027   | -26.007 | 1.00 | 0.00 |
| ATOM | 2239 | C6  | LIG | 136 | -7.055  | 3.713   | -24.772 | 1.00 | 0.00 |
| ATOM | 2240 | H4  | LIG | 136 | -7.824  | 3.433   | -24.059 | 1.00 | 0.00 |
| ATOM | 2241 | C7  | LIG | 136 | -5.953  | 3.408   | -26.928 | 1.00 | 0.00 |
| ATOM | 2242 | H5  | LIG | 136 | -5.868  | 2.885   | -27.875 | 1.00 | 0.00 |
| ATOM | 2243 | C8  | LIG | 136 | -0.078  | 5.454   | -25.201 | 1.00 | 0.00 |
| ATOM | 2244 | H6  | LIG | 136 | 0.442   | 5.876   | -24.357 | 1.00 | 0.00 |
| ATOM | 2245 | C9  | LIG | 136 | 0.461   | 4.925   | -26.338 | 1.00 | 0.00 |
| ATOM | 2246 | C10 | LIG | 136 | 1.852   | 4.734   | -26.825 | 1.00 | 0.00 |
| ATOM | 2247 | H7  | LIG | 136 | 2.568   | 5.102   | -26.086 | 1.00 | 0.00 |
| ATOM | 2248 | H8  | LIG | 136 | 2.058   | 3.674   | -27.013 | 1.00 | 0.00 |
| ATOM | 2249 | H9  | LIG | 136 | 2.012   | 5.272   | -27.765 | 1.00 | 0.00 |
| TER  |      |     |     |     |         |         |         |      |      |
| ATOM | 2250 | S1  | LIG | 137 | -15.865 | -19.990 | -19.456 | 1.00 | 0.00 |
| ATOM | 2251 | O1  | LIG | 137 | -20.326 | -18.905 | -19.660 | 1.00 | 0.00 |
| ATOM | 2252 | O2  | LIG | 137 | -14.350 | -19.368 | -19.467 | 1.00 | 0.00 |
| ATOM | 2253 | O3  | LIG | 137 | -16.502 | -20.604 | -18.088 | 1.00 | 0.00 |
| ATOM | 2254 | N1  | LIG | 137 | -16.828 | -18.486 | -19.970 | 1.00 | 0.00 |
| ATOM | 2255 | H1  | LIG | 137 | -16.228 | -17.680 | -19.812 | 1.00 | 0.00 |
| ATOM | 2256 | N2  | LIG | 137 | -18.995 | -19.428 | -19.953 | 1.00 | 0.00 |
| ATOM | 2257 | N3  | LIG | 137 | -16.306 | -23.960 | -23.933 | 1.00 | 0.00 |



|      |      |     |     |     |         |         |         |      |      |
|------|------|-----|-----|-----|---------|---------|---------|------|------|
| ATOM | 2258 | H10 | LIG | 137 | -15.548 | -24.093 | -24.580 | 1.00 | 0.00 |
| ATOM | 2259 | H11 | LIG | 137 | -17.131 | -24.521 | -24.055 | 1.00 | 0.00 |
| ATOM | 2260 | C1  | LIG | 137 | -16.038 | -21.196 | -20.847 | 1.00 | 0.00 |
| ATOM | 2261 | C2  | LIG | 137 | -14.955 | -21.334 | -21.714 | 1.00 | 0.00 |
| ATOM | 2262 | H2  | LIG | 137 | -14.063 | -20.735 | -21.568 | 1.00 | 0.00 |
| ATOM | 2263 | C3  | LIG | 137 | -17.207 | -21.945 | -20.969 | 1.00 | 0.00 |
| ATOM | 2264 | H3  | LIG | 137 | -18.037 | -21.790 | -20.291 | 1.00 | 0.00 |
| ATOM | 2265 | C4  | LIG | 137 | -18.191 | -18.376 | -19.771 | 1.00 | 0.00 |
| ATOM | 2266 | C5  | LIG | 137 | -16.216 | -23.043 | -22.911 | 1.00 | 0.00 |
| ATOM | 2267 | C6  | LIG | 137 | -15.046 | -22.261 | -22.747 | 1.00 | 0.00 |
| ATOM | 2268 | H4  | LIG | 137 | -14.214 | -22.389 | -23.432 | 1.00 | 0.00 |
| ATOM | 2269 | C7  | LIG | 137 | -17.292 | -22.867 | -22.007 | 1.00 | 0.00 |
| ATOM | 2270 | H5  | LIG | 137 | -18.195 | -23.457 | -22.127 | 1.00 | 0.00 |
| ATOM | 2271 | C8  | LIG | 137 | -18.908 | -17.188 | -19.395 | 1.00 | 0.00 |
| ATOM | 2272 | H6  | LIG | 137 | -18.490 | -16.217 | -19.189 | 1.00 | 0.00 |
| ATOM | 2273 | C9  | LIG | 137 | -20.220 | -17.562 | -19.347 | 1.00 | 0.00 |
| ATOM | 2274 | C10 | LIG | 137 | -21.483 | -16.847 | -19.025 | 1.00 | 0.00 |
| ATOM | 2275 | H7  | LIG | 137 | -21.278 | -15.801 | -18.786 | 1.00 | 0.00 |
| ATOM | 2276 | H8  | LIG | 137 | -22.179 | -16.882 | -19.871 | 1.00 | 0.00 |
| ATOM | 2277 | H9  | LIG | 137 | -21.984 | -17.310 | -18.168 | 1.00 | 0.00 |
| TER  |      |     |     |     |         |         |         |      |      |
| END  |      |     |     |     |         |         |         |      |      |

**Table E:** The number of atoms present in the system of BE-Dic

|      |    |     |     |   |       |        |        |      |      |
|------|----|-----|-----|---|-------|--------|--------|------|------|
| ATOM | 1  | N   | GLU | 1 | 9.554 | 18.504 | -4.758 | 1.00 | 0.00 |
| ATOM | 2  | H1  | GLU | 1 | 9.864 | 19.119 | -5.496 | 1.00 | 0.00 |
| ATOM | 3  | H2  | GLU | 1 | 9.961 | 17.591 | -4.904 | 1.00 | 0.00 |
| ATOM | 4  | H3  | GLU | 1 | 9.674 | 18.974 | -3.872 | 1.00 | 0.00 |
| ATOM | 5  | CA  | GLU | 1 | 8.084 | 18.308 | -4.904 | 1.00 | 0.00 |
| ATOM | 6  | HA  | GLU | 1 | 7.855 | 17.251 | -5.044 | 1.00 | 0.00 |
| ATOM | 7  | CB  | GLU | 1 | 7.377 | 18.798 | -3.637 | 1.00 | 0.00 |
| ATOM | 8  | HB2 | GLU | 1 | 7.798 | 18.292 | -2.768 | 1.00 | 0.00 |
| ATOM | 9  | HB3 | GLU | 1 | 7.520 | 19.873 | -3.535 | 1.00 | 0.00 |
| ATOM | 10 | CG  | GLU | 1 | 5.879 | 18.489 | -3.732 | 1.00 | 0.00 |
| ATOM | 11 | HG2 | GLU | 1 | 5.482 | 18.933 | -4.644 | 1.00 | 0.00 |
| ATOM | 12 | HG3 | GLU | 1 | 5.735 | 17.409 | -3.761 | 1.00 | 0.00 |
| ATOM | 13 | CD  | GLU | 1 | 5.147 | 19.067 | -2.525 | 1.00 | 0.00 |
| ATOM | 14 | OE1 | GLU | 1 | 5.276 | 18.501 | -1.451 | 1.00 | 0.00 |
| ATOM | 15 | OE2 | GLU | 1 | 4.465 | 20.065 | -2.692 | 1.00 | 0.00 |
| ATOM | 16 | C   | GLU | 1 | 7.588 | 19.089 | -6.119 | 1.00 | 0.00 |
| ATOM | 17 | O   | GLU | 1 | 7.443 | 20.311 | -6.066 | 1.00 | 0.00 |
| ATOM | 18 | N   | ALA | 2 | 7.328 | 18.372 | -7.210 | 1.00 | 0.00 |
| ATOM | 19 | H   | ALA | 2 | 7.480 | 17.373 | -7.212 | 1.00 | 0.00 |
| ATOM | 20 | CA  | ALA | 2 | 6.844 | 19.002 | -8.435 | 1.00 | 0.00 |

|      |    |     |     |   |       |        |         |      |      |
|------|----|-----|-----|---|-------|--------|---------|------|------|
| ATOM | 21 | HA  | ALA | 2 | 7.500 | 19.825 | -8.718  | 1.00 | 0.00 |
| ATOM | 22 | CB  | ALA | 2 | 6.820 | 17.982 | -9.575  | 1.00 | 0.00 |
| ATOM | 23 | HB1 | ALA | 2 | 6.160 | 17.156 | -9.310  | 1.00 | 0.00 |
| ATOM | 24 | HB2 | ALA | 2 | 6.456 | 18.460 | -10.484 | 1.00 | 0.00 |
| ATOM | 25 | HB3 | ALA | 2 | 7.828 | 17.601 | -9.744  | 1.00 | 0.00 |
| ATOM | 26 | C   | ALA | 2 | 5.443 | 19.570 | -8.230  | 1.00 | 0.00 |
| ATOM | 27 | O   | ALA | 2 | 4.650 | 19.027 | -7.462  | 1.00 | 0.00 |
| ATOM | 28 | N   | GLU | 3 | 5.148 | 20.666 | -8.922  | 1.00 | 0.00 |
| ATOM | 29 | H   | GLU | 3 | 5.841 | 21.093 | -9.519  | 1.00 | 0.00 |
| ATOM | 30 | CA  | GLU | 3 | 3.839 | 21.304 | -8.814  | 1.00 | 0.00 |
| ATOM | 31 | HA  | GLU | 3 | 3.628 | 21.547 | -7.772  | 1.00 | 0.00 |
| ATOM | 32 | CB  | GLU | 3 | 3.814 | 22.602 | -9.636  | 1.00 | 0.00 |
| ATOM | 33 | HB2 | GLU | 3 | 2.919 | 23.168 | -9.378  | 1.00 | 0.00 |
| ATOM | 34 | HB3 | GLU | 3 | 4.699 | 23.192 | -9.395  | 1.00 | 0.00 |
| ATOM | 35 | CG  | GLU | 3 | 3.804 | 22.285 | -11.139 | 1.00 | 0.00 |
| ATOM | 36 | HG2 | GLU | 3 | 2.923 | 21.687 | -11.371 | 1.00 | 0.00 |
| ATOM | 37 | HG3 | GLU | 3 | 3.765 | 23.220 | -11.697 | 1.00 | 0.00 |
| ATOM | 38 | CD  | GLU | 3 | 5.062 | 21.510 | -11.531 | 1.00 | 0.00 |
| ATOM | 39 | OE1 | GLU | 3 | 6.147 | 22.015 | -11.293 | 1.00 | 0.00 |
| ATOM | 40 | OE2 | GLU | 3 | 4.921 | 20.420 | -12.063 | 1.00 | 0.00 |
| ATOM | 41 | C   | GLU | 3 | 2.736 | 20.363 | -9.297  | 1.00 | 0.00 |
| ATOM | 42 | O   | GLU | 3 | 1.578 | 20.494 | -8.898  | 1.00 | 0.00 |

|      |    |     |     |   |       |        |         |      |      |
|------|----|-----|-----|---|-------|--------|---------|------|------|
| ATOM | 43 | N   | ALA | 4 | 3.106 | 19.419 | -10.160 | 1.00 | 0.00 |
| ATOM | 44 | H   | ALA | 4 | 4.062 | 19.371 | -10.483 | 1.00 | 0.00 |
| ATOM | 45 | CA  | ALA | 4 | 2.144 | 18.460 | -10.698 | 1.00 | 0.00 |
| ATOM | 46 | HA  | ALA | 4 | 1.247 | 18.989 | -11.018 | 1.00 | 0.00 |
| ATOM | 47 | CB  | ALA | 4 | 2.741 | 17.735 | -11.906 | 1.00 | 0.00 |
| ATOM | 48 | HB1 | ALA | 4 | 3.636 | 17.193 | -11.599 | 1.00 | 0.00 |
| ATOM | 49 | HB2 | ALA | 4 | 2.010 | 17.032 | -12.306 | 1.00 | 0.00 |
| ATOM | 50 | HB3 | ALA | 4 | 3.003 | 18.462 | -12.674 | 1.00 | 0.00 |
| ATOM | 51 | C   | ALA | 4 | 1.730 | 17.450 | -9.639  | 1.00 | 0.00 |
| ATOM | 52 | O   | ALA | 4 | 0.878 | 16.594 | -9.882  | 1.00 | 0.00 |
| ATOM | 53 | N   | GLN | 5 | 2.329 | 17.565 | -8.463  | 1.00 | 0.00 |
| ATOM | 54 | H   | GLN | 5 | 3.023 | 18.284 | -8.316  | 1.00 | 0.00 |
| ATOM | 55 | CA  | GLN | 5 | 2.015 | 16.673 | -7.357  | 1.00 | 0.00 |
| ATOM | 56 | HA  | GLN | 5 | 2.382 | 15.666 | -7.560  | 1.00 | 0.00 |
| ATOM | 57 | CB  | GLN | 5 | 2.694 | 17.194 | -6.095  | 1.00 | 0.00 |
| ATOM | 58 | HB2 | GLN | 5 | 3.770 | 17.248 | -6.262  | 1.00 | 0.00 |
| ATOM | 59 | HB3 | GLN | 5 | 2.312 | 18.189 | -5.866  | 1.00 | 0.00 |
| ATOM | 60 | CG  | GLN | 5 | 2.407 | 16.254 | -4.919  | 1.00 | 0.00 |
| ATOM | 61 | HG2 | GLN | 5 | 1.335 | 16.078 | -4.834  | 1.00 | 0.00 |
| ATOM | 62 | HG3 | GLN | 5 | 2.920 | 15.304 | -5.072  | 1.00 | 0.00 |
| ATOM | 63 | CD  | GLN | 5 | 2.904 | 16.872 | -3.616  | 1.00 | 0.00 |
| ATOM | 64 | OE1 | GLN | 5 | 2.516 | 17.988 | -3.269  | 1.00 | 0.00 |

|      |    |      |     |   |        |        |        |      |      |
|------|----|------|-----|---|--------|--------|--------|------|------|
| ATOM | 65 | NE2  | GLN | 5 | 3.742  | 16.209 | -2.868 | 1.00 | 0.00 |
| ATOM | 66 | HE21 | GLN | 5 | 4.074  | 16.614 | -2.004 | 1.00 | 0.00 |
| ATOM | 67 | HE22 | GLN | 5 | 4.056  | 15.293 | -3.156 | 1.00 | 0.00 |
| ATOM | 68 | C    | GLN | 5 | 0.506  | 16.614 | -7.132 | 1.00 | 0.00 |
| ATOM | 69 | O    | GLN | 5 | -0.044 | 15.561 | -6.810 | 1.00 | 0.00 |
| ATOM | 70 | N    | GLU | 6 | -0.153 | 17.759 | -7.299 | 1.00 | 0.00 |
| ATOM | 71 | H    | GLU | 6 | 0.349  | 18.603 | -7.534 | 1.00 | 0.00 |
| ATOM | 72 | CA   | GLU | 6 | -1.597 | 17.842 | -7.109 | 1.00 | 0.00 |
| ATOM | 73 | HA   | GLU | 6 | -1.851 | 17.650 | -6.066 | 1.00 | 0.00 |
| ATOM | 74 | CB   | GLU | 6 | -2.087 | 19.246 | -7.483 | 1.00 | 0.00 |
| ATOM | 75 | HB2  | GLU | 6 | -3.153 | 19.322 | -7.272 | 1.00 | 0.00 |
| ATOM | 76 | HB3  | GLU | 6 | -1.546 | 19.985 | -6.891 | 1.00 | 0.00 |
| ATOM | 77 | CG   | GLU | 6 | -1.841 | 19.506 | -8.974 | 1.00 | 0.00 |
| ATOM | 78 | HG2  | GLU | 6 | -0.807 | 19.258 | -9.215 | 1.00 | 0.00 |
| ATOM | 79 | HG3  | GLU | 6 | -2.511 | 18.880 | -9.563 | 1.00 | 0.00 |
| ATOM | 80 | CD   | GLU | 6 | -2.101 | 20.975 | -9.297 | 1.00 | 0.00 |
| ATOM | 81 | OE1  | GLU | 6 | -3.260 | 21.353 | -9.353 | 1.00 | 0.00 |
| ATOM | 82 | OE2  | GLU | 6 | -1.137 | 21.699 | -9.484 | 1.00 | 0.00 |
| ATOM | 83 | C    | GLU | 6 | -2.325 | 16.792 | -7.948 | 1.00 | 0.00 |
| ATOM | 84 | O    | GLU | 6 | -3.241 | 16.130 | -7.461 | 1.00 | 0.00 |
| ATOM | 85 | N    | GLU | 7 | -1.903 | 16.631 | -9.203 | 1.00 | 0.00 |
| ATOM | 86 | H    | GLU | 7 | -1.155 | 17.202 | -9.571 | 1.00 | 0.00 |

|      |     |     |     |   |        |        |         |      |      |
|------|-----|-----|-----|---|--------|--------|---------|------|------|
| ATOM | 87  | CA  | GLU | 7 | -2.515 | 15.643 | -10.083 | 1.00 | 0.00 |
| ATOM | 88  | HA  | GLU | 7 | -3.565 | 15.888 | -10.241 | 1.00 | 0.00 |
| ATOM | 89  | CB  | GLU | 7 | -1.805 | 15.627 | -11.443 | 1.00 | 0.00 |
| ATOM | 90  | HB2 | GLU | 7 | -2.002 | 16.563 | -11.964 | 1.00 | 0.00 |
| ATOM | 91  | HB3 | GLU | 7 | -0.731 | 15.516 | -11.289 | 1.00 | 0.00 |
| ATOM | 92  | CG  | GLU | 7 | -2.324 | 14.453 | -12.286 | 1.00 | 0.00 |
| ATOM | 93  | HG2 | GLU | 7 | -3.340 | 14.213 | -11.971 | 1.00 | 0.00 |
| ATOM | 94  | HG3 | GLU | 7 | -2.327 | 14.738 | -13.338 | 1.00 | 0.00 |
| ATOM | 95  | CD  | GLU | 7 | -1.430 | 13.230 | -12.093 | 1.00 | 0.00 |
| ATOM | 96  | OE1 | GLU | 7 | -0.260 | 13.315 | -12.429 | 1.00 | 0.00 |
| ATOM | 97  | OE2 | GLU | 7 | -1.929 | 12.224 | -11.616 | 1.00 | 0.00 |
| ATOM | 98  | C   | GLU | 7 | -2.425 | 14.268 | -9.447  | 1.00 | 0.00 |
| ATOM | 99  | O   | GLU | 7 | -3.365 | 13.475 | -9.508  | 1.00 | 0.00 |
| ATOM | 100 | N   | CYX | 8 | -1.272 | 13.995 | -8.845  | 1.00 | 0.00 |
| ATOM | 101 | H   | CYX | 8 | -0.522 | 14.672 | -8.837  | 1.00 | 0.00 |
| ATOM | 102 | CA  | CYX | 8 | -1.046 | 12.714 | -8.209  | 1.00 | 0.00 |
| ATOM | 103 | HA  | CYX | 8 | -1.303 | 11.906 | -8.894  | 1.00 | 0.00 |
| ATOM | 104 | CB  | CYX | 8 | 0.429  | 12.575 | -7.820  | 1.00 | 0.00 |
| ATOM | 105 | HB2 | CYX | 8 | 0.680  | 13.325 | -7.070  | 1.00 | 0.00 |
| ATOM | 106 | HB3 | CYX | 8 | 0.606  | 11.580 | -7.411  | 1.00 | 0.00 |
| ATOM | 107 | SG  | CYX | 8 | 1.466  | 12.814 | -9.283  | 1.00 | 0.00 |
| ATOM | 108 | C   | CYX | 8 | -1.916 | 12.565 | -6.968  | 1.00 | 0.00 |

|      |     |      |     |   |        |        |        |      |      |
|------|-----|------|-----|---|--------|--------|--------|------|------|
| ATOM | 109 | O    | CYX | 8 | -2.703 | 11.625 | -6.866 | 1.00 | 0.00 |
| ATOM | 110 | N    | ARG | 9 | -1.767 | 13.499 | -6.032 | 1.00 | 0.00 |
| ATOM | 111 | H    | ARG | 9 | -1.092 | 14.240 | -6.156 | 1.00 | 0.00 |
| ATOM | 112 | CA   | ARG | 9 | -2.540 | 13.466 | -4.794 | 1.00 | 0.00 |
| ATOM | 113 | HA   | ARG | 9 | -2.274 | 12.585 | -4.209 | 1.00 | 0.00 |
| ATOM | 114 | CB   | ARG | 9 | -2.239 | 14.715 | -3.962 | 1.00 | 0.00 |
| ATOM | 115 | HB2  | ARG | 9 | -1.163 | 14.795 | -3.806 | 1.00 | 0.00 |
| ATOM | 116 | HB3  | ARG | 9 | -2.595 | 15.597 | -4.492 | 1.00 | 0.00 |
| ATOM | 117 | CG   | ARG | 9 | -2.945 | 14.615 | -2.605 | 1.00 | 0.00 |
| ATOM | 118 | HG2  | ARG | 9 | -4.024 | 14.588 | -2.758 | 1.00 | 0.00 |
| ATOM | 119 | HG3  | ARG | 9 | -2.628 | 13.704 | -2.097 | 1.00 | 0.00 |
| ATOM | 120 | CD   | ARG | 9 | -2.582 | 15.829 | -1.748 | 1.00 | 0.00 |
| ATOM | 121 | HD2  | ARG | 9 | -2.962 | 15.695 | -0.735 | 1.00 | 0.00 |
| ATOM | 122 | HD3  | ARG | 9 | -1.499 | 15.950 | -1.716 | 1.00 | 0.00 |
| ATOM | 123 | NE   | ARG | 9 | -3.172 | 17.040 | -2.313 | 1.00 | 0.00 |
| ATOM | 124 | HE   | ARG | 9 | -3.846 | 16.973 | -3.062 | 1.00 | 0.00 |
| ATOM | 125 | CZ   | ARG | 9 | -2.839 | 18.249 | -1.863 | 1.00 | 0.00 |
| ATOM | 126 | NH1  | ARG | 9 | -1.973 | 18.374 | -0.894 | 1.00 | 0.00 |
| ATOM | 127 | HH11 | ARG | 9 | -1.555 | 17.550 | -0.485 | 1.00 | 0.00 |
| ATOM | 128 | HH12 | ARG | 9 | -1.725 | 19.293 | -0.558 | 1.00 | 0.00 |
| ATOM | 129 | NH2  | ARG | 9 | -3.382 | 19.311 | -2.390 | 1.00 | 0.00 |
| ATOM | 130 | HH21 | ARG | 9 | -4.053 | 19.212 | -3.138 | 1.00 | 0.00 |

|      |     |      |     |    |        |        |         |      |      |
|------|-----|------|-----|----|--------|--------|---------|------|------|
| ATOM | 131 | HH22 | ARG | 9  | -3.128 | 20.226 | -2.047  | 1.00 | 0.00 |
| ATOM | 132 | C    | ARG | 9  | -4.035 | 13.389 | -5.086  | 1.00 | 0.00 |
| ATOM | 133 | O    | ARG | 9  | -4.758 | 12.621 | -4.454  | 1.00 | 0.00 |
| ATOM | 134 | N    | GLU | 10 | -4.493 | 14.187 | -6.047  | 1.00 | 0.00 |
| ATOM | 135 | H    | GLU | 10 | -3.870 | 14.817 | -6.532  | 1.00 | 0.00 |
| ATOM | 136 | CA   | GLU | 10 | -5.906 | 14.193 | -6.412  | 1.00 | 0.00 |
| ATOM | 137 | HA   | GLU | 10 | -6.515 | 14.466 | -5.550  | 1.00 | 0.00 |
| ATOM | 138 | CB   | GLU | 10 | -6.149 | 15.215 | -7.527  | 1.00 | 0.00 |
| ATOM | 139 | HB2  | GLU | 10 | -5.889 | 16.210 | -7.167  | 1.00 | 0.00 |
| ATOM | 140 | HB3  | GLU | 10 | -5.526 | 14.966 | -8.386  | 1.00 | 0.00 |
| ATOM | 141 | CG   | GLU | 10 | -7.626 | 15.190 | -7.941  | 1.00 | 0.00 |
| ATOM | 142 | HG2  | GLU | 10 | -8.233 | 14.896 | -7.085  | 1.00 | 0.00 |
| ATOM | 143 | HG3  | GLU | 10 | -7.920 | 16.186 | -8.270  | 1.00 | 0.00 |
| ATOM | 144 | CD   | GLU | 10 | -7.837 | 14.194 | -9.081  | 1.00 | 0.00 |
| ATOM | 145 | OE1  | GLU | 10 | -7.187 | 14.342 | -10.103 | 1.00 | 0.00 |
| ATOM | 146 | OE2  | GLU | 10 | -8.646 | 13.295 | -8.914  | 1.00 | 0.00 |
| ATOM | 147 | C    | GLU | 10 | -6.343 | 12.809 | -6.882  | 1.00 | 0.00 |
| ATOM | 148 | O    | GLU | 10 | -7.368 | 12.285 | -6.442  | 1.00 | 0.00 |
| ATOM | 149 | N    | GLN | 11 | -5.556 | 12.230 | -7.785  | 1.00 | 0.00 |
| ATOM | 150 | H    | GLN | 11 | -4.745 | 12.719 | -8.135  | 1.00 | 0.00 |
| ATOM | 151 | CA   | GLN | 11 | -5.856 | 10.910 | -8.329  | 1.00 | 0.00 |
| ATOM | 152 | HA   | GLN | 11 | -6.834 | 10.915 | -8.810  | 1.00 | 0.00 |



|      |     |      |     |    |        |        |         |      |      |
|------|-----|------|-----|----|--------|--------|---------|------|------|
| ATOM | 153 | CB   | GLN | 11 | -4.799 | 10.526 | -9.371  | 1.00 | 0.00 |
| ATOM | 154 | HB2  | GLN | 11 | -4.657 | 11.353 | -10.066 | 1.00 | 0.00 |
| ATOM | 155 | HB3  | GLN | 11 | -3.856 | 10.308 | -8.868  | 1.00 | 0.00 |
| ATOM | 156 | CG   | GLN | 11 | -5.265 | 9.286  | -10.142 | 1.00 | 0.00 |
| ATOM | 157 | HG2  | GLN | 11 | -5.341 | 8.435  | -9.464  | 1.00 | 0.00 |
| ATOM | 158 | HG3  | GLN | 11 | -6.237 | 9.476  | -10.596 | 1.00 | 0.00 |
| ATOM | 159 | CD   | GLN | 11 | -4.268 | 8.941  | -11.248 | 1.00 | 0.00 |
| ATOM | 160 | OE1  | GLN | 11 | -3.334 | 9.701  | -11.510 | 1.00 | 0.00 |
| ATOM | 161 | NE2  | GLN | 11 | -4.413 | 7.830  | -11.917 | 1.00 | 0.00 |
| ATOM | 162 | HE21 | GLN | 11 | -3.758 | 7.595  | -12.649 | 1.00 | 0.00 |
| ATOM | 163 | HE22 | GLN | 11 | -5.179 | 7.209  | -11.699 | 1.00 | 0.00 |
| ATOM | 164 | C    | GLN | 11 | -5.915 | 9.850  | -7.228  | 1.00 | 0.00 |
| ATOM | 165 | O    | GLN | 11 | -6.690 | 8.898  | -7.320  | 1.00 | 0.00 |
| ATOM | 166 | N    | MET | 12 | -5.084 | 10.008 | -6.196  | 1.00 | 0.00 |
| ATOM | 167 | H    | MET | 12 | -4.440 | 10.786 | -6.170  | 1.00 | 0.00 |
| ATOM | 168 | CA   | MET | 12 | -5.048 | 9.040  | -5.097  | 1.00 | 0.00 |
| ATOM | 169 | HA   | MET | 12 | -4.666 | 8.084  | -5.457  | 1.00 | 0.00 |
| ATOM | 170 | CB   | MET | 12 | -4.134 | 9.540  | -3.976  | 1.00 | 0.00 |
| ATOM | 171 | HB2  | MET | 12 | -4.421 | 10.553 | -3.695  | 1.00 | 0.00 |
| ATOM | 172 | HB3  | MET | 12 | -4.225 | 8.884  | -3.110  | 1.00 | 0.00 |
| ATOM | 173 | CG   | MET | 12 | -2.686 | 9.538  | -4.466  | 1.00 | 0.00 |
| ATOM | 174 | HG2  | MET | 12 | -2.401 | 8.528  | -4.762  | 1.00 | 0.00 |

|      |     |          |    |         |        |        |      |      |
|------|-----|----------|----|---------|--------|--------|------|------|
| ATOM | 175 | HG3 MET  | 12 | -2.587  | 10.208 | -5.320 | 1.00 | 0.00 |
| ATOM | 176 | SD MET   | 12 | -1.593  | 10.099 | -3.141 | 1.00 | 0.00 |
| ATOM | 177 | CE MET   | 12 | -0.145  | 10.424 | -4.175 | 1.00 | 0.00 |
| ATOM | 178 | HE1 MET  | 12 | -0.394  | 11.176 | -4.923 | 1.00 | 0.00 |
| ATOM | 179 | HE2 MET  | 12 | 0.673   | 10.788 | -3.552 | 1.00 | 0.00 |
| ATOM | 180 | HE3 MET  | 12 | 0.161   | 9.503  | -4.673 | 1.00 | 0.00 |
| ATOM | 181 | C MET    | 12 | -6.445  | 8.777  | -4.540 | 1.00 | 0.00 |
| ATOM | 182 | O MET    | 12 | -6.786  | 7.633  | -4.241 | 1.00 | 0.00 |
| ATOM | 183 | N GLN    | 13 | -7.255  | 9.828  | -4.409 | 1.00 | 0.00 |
| ATOM | 184 | H GLN    | 13 | -6.947  | 10.760 | -4.645 | 1.00 | 0.00 |
| ATOM | 185 | CA GLN   | 13 | -8.612  | 9.655  | -3.896 | 1.00 | 0.00 |
| ATOM | 186 | HA GLN   | 13 | -8.572  | 9.249  | -2.885 | 1.00 | 0.00 |
| ATOM | 187 | CB GLN   | 13 | -9.354  | 10.995 | -3.857 | 1.00 | 0.00 |
| ATOM | 188 | HB2 GLN  | 13 | -9.186  | 11.525 | -4.794 | 1.00 | 0.00 |
| ATOM | 189 | HB3 GLN  | 13 | -10.421 | 10.811 | -3.730 | 1.00 | 0.00 |
| ATOM | 190 | CG GLN   | 13 | -8.841  | 11.845 | -2.690 | 1.00 | 0.00 |
| ATOM | 191 | HG2 GLN  | 13 | -9.471  | 12.726 | -2.574 | 1.00 | 0.00 |
| ATOM | 192 | HG3 GLN  | 13 | -8.859  | 11.262 | -1.769 | 1.00 | 0.00 |
| ATOM | 193 | CD GLN   | 13 | -7.409  | 12.301 | -2.950 | 1.00 | 0.00 |
| ATOM | 194 | OE1 GLN  | 13 | -6.459  | 11.627 | -2.552 | 1.00 | 0.00 |
| ATOM | 195 | NE2 GLN  | 13 | -7.197  | 13.415 | -3.595 | 1.00 | 0.00 |
| ATOM | 196 | HE21 GLN | 13 | -6.250  | 13.721 | -3.770 | 1.00 | 0.00 |

|      |     |      |     |    |         |        |         |      |      |
|------|-----|------|-----|----|---------|--------|---------|------|------|
| ATOM | 197 | HE22 | GLN | 13 | -7.980  | 13.965 | -3.916  | 1.00 | 0.00 |
| ATOM | 198 | C    | GLN | 13 | -9.372  | 8.680  | -4.782  | 1.00 | 0.00 |
| ATOM | 199 | O    | GLN | 13 | -10.042 | 7.774  | -4.291  | 1.00 | 0.00 |
| ATOM | 200 | N    | ARG | 14 | -9.226  | 8.855  | -6.093  | 1.00 | 0.00 |
| ATOM | 201 | H    | ARG | 14 | -8.669  | 9.623  | -6.440  | 1.00 | 0.00 |
| ATOM | 202 | CA   | ARG | 14 | -9.857  | 7.975  | -7.054  | 1.00 | 0.00 |
| ATOM | 203 | HA   | ARG | 14 | -10.940 | 8.011  | -6.935  | 1.00 | 0.00 |
| ATOM | 204 | CB   | ARG | 14 | -9.506  | 8.408  | -8.482  | 1.00 | 0.00 |
| ATOM | 205 | HB2  | ARG | 14 | -9.679  | 9.479  | -8.585  | 1.00 | 0.00 |
| ATOM | 206 | HB3  | ARG | 14 | -8.455  | 8.190  | -8.675  | 1.00 | 0.00 |
| ATOM | 207 | CG   | ARG | 14 | -10.378 | 7.650  | -9.489  | 1.00 | 0.00 |
| ATOM | 208 | HG2  | ARG | 14 | -9.905  | 7.678  | -10.471 | 1.00 | 0.00 |
| ATOM | 209 | HG3  | ARG | 14 | -10.485 | 6.614  | -9.167  | 1.00 | 0.00 |
| ATOM | 210 | CD   | ARG | 14 | -11.759 | 8.304  | -9.569  | 1.00 | 0.00 |
| ATOM | 211 | HD2  | ARG | 14 | -12.415 | 7.708  | -10.204 | 1.00 | 0.00 |
| ATOM | 212 | HD3  | ARG | 14 | -12.191 | 8.380  | -8.571  | 1.00 | 0.00 |
| ATOM | 213 | NE   | ARG | 14 | -11.650 | 9.646  | -10.136 | 1.00 | 0.00 |
| ATOM | 214 | HE   | ARG | 14 | -10.855 | 9.889  | -10.709 | 1.00 | 0.00 |
| ATOM | 215 | CZ   | ARG | 14 | -12.582 | 10.572 | -9.916  | 1.00 | 0.00 |
| ATOM | 216 | NH1  | ARG | 14 | -13.627 | 10.294 | -9.184  | 1.00 | 0.00 |
| ATOM | 217 | HH11 | ARG | 14 | -13.728 | 9.372  | -8.783  | 1.00 | 0.00 |
| ATOM | 218 | HH12 | ARG | 14 | -14.329 | 11.001 | -9.022  | 1.00 | 0.00 |

|      |     |      |     |    |         |        |         |      |      |
|------|-----|------|-----|----|---------|--------|---------|------|------|
| ATOM | 219 | NH2  | ARG | 14 | -12.450 | 11.763 | -10.434 | 1.00 | 0.00 |
| ATOM | 220 | HH21 | ARG | 14 | -11.641 | 11.977 | -10.999 | 1.00 | 0.00 |
| ATOM | 221 | HH22 | ARG | 14 | -13.157 | 12.464 | -10.266 | 1.00 | 0.00 |
| ATOM | 222 | C    | ARG | 14 | -9.362  | 6.569  | -6.798  | 1.00 | 0.00 |
| ATOM | 223 | O    | ARG | 14 | -10.132 | 5.608  | -6.805  | 1.00 | 0.00 |
| ATOM | 224 | N    | GLN | 15 | -8.056  | 6.471  | -6.548  | 1.00 | 0.00 |
| ATOM | 225 | H    | GLN | 15 | -7.462  | 7.287  | -6.573  | 1.00 | 0.00 |
| ATOM | 226 | CA   | GLN | 15 | -7.451  | 5.195  | -6.261  | 1.00 | 0.00 |
| ATOM | 227 | HA   | GLN | 15 | -7.834  | 4.438  | -6.945  | 1.00 | 0.00 |
| ATOM | 228 | CB   | GLN | 15 | -5.928  | 5.282  | -6.430  | 1.00 | 0.00 |
| ATOM | 229 | HB2  | GLN | 15 | -5.618  | 6.326  | -6.383  | 1.00 | 0.00 |
| ATOM | 230 | HB3  | GLN | 15 | -5.443  | 4.723  | -5.629  | 1.00 | 0.00 |
| ATOM | 231 | CG   | GLN | 15 | -5.523  | 4.690  | -7.784  | 1.00 | 0.00 |
| ATOM | 232 | HG2  | GLN | 15 | -4.488  | 4.349  | -7.743  | 1.00 | 0.00 |
| ATOM | 233 | HG3  | GLN | 15 | -6.171  | 3.851  | -8.038  | 1.00 | 0.00 |
| ATOM | 234 | CD   | GLN | 15 | -5.645  | 5.748  | -8.876  | 1.00 | 0.00 |
| ATOM | 235 | OE1  | GLN | 15 | -4.638  | 6.274  | -9.347  | 1.00 | 0.00 |
| ATOM | 236 | NE2  | GLN | 15 | -6.828  | 6.097  | -9.305  | 1.00 | 0.00 |
| ATOM | 237 | HE21 | GLN | 15 | -6.913  | 6.797  | -10.028 | 1.00 | 0.00 |
| ATOM | 238 | HE22 | GLN | 15 | -7.652  | 5.665  | -8.912  | 1.00 | 0.00 |
| ATOM | 239 | C    | GLN | 15 | -7.803  | 4.789  | -4.839  | 1.00 | 0.00 |
| ATOM | 240 | O    | GLN | 15 | -6.981  | 4.873  | -3.925  | 1.00 | 0.00 |

|      |     |      |     |    |         |       |        |      |      |
|------|-----|------|-----|----|---------|-------|--------|------|------|
| ATOM | 241 | N    | GLN | 16 | -9.034  | 4.343 | -4.674 | 1.00 | 0.00 |
| ATOM | 242 | H    | GLN | 16 | -9.672  | 4.321 | -5.456 | 1.00 | 0.00 |
| ATOM | 243 | CA   | GLN | 16 | -9.523  | 3.907 | -3.372 | 1.00 | 0.00 |
| ATOM | 244 | HA   | GLN | 16 | -9.112  | 4.539 | -2.584 | 1.00 | 0.00 |
| ATOM | 245 | CB   | GLN | 16 | -11.048 | 4.009 | -3.334 | 1.00 | 0.00 |
| ATOM | 246 | HB2  | GLN | 16 | -11.480 | 3.389 | -4.120 | 1.00 | 0.00 |
| ATOM | 247 | HB3  | GLN | 16 | -11.417 | 3.674 | -2.364 | 1.00 | 0.00 |
| ATOM | 248 | CG   | GLN | 16 | -11.450 | 5.468 | -3.556 | 1.00 | 0.00 |
| ATOM | 249 | HG2  | GLN | 16 | -11.020 | 6.086 | -2.767 | 1.00 | 0.00 |
| ATOM | 250 | HG3  | GLN | 16 | -11.081 | 5.806 | -4.524 | 1.00 | 0.00 |
| ATOM | 251 | CD   | GLN | 16 | -12.967 | 5.629 | -3.529 | 1.00 | 0.00 |
| ATOM | 252 | OE1  | GLN | 16 | -13.703 | 4.641 | -3.513 | 1.00 | 0.00 |
| ATOM | 253 | NE2  | GLN | 16 | -13.477 | 6.830 | -3.526 | 1.00 | 0.00 |
| ATOM | 254 | HE21 | GLN | 16 | -14.479 | 6.949 | -3.508 | 1.00 | 0.00 |
| ATOM | 255 | HE22 | GLN | 16 | -12.866 | 7.634 | -3.541 | 1.00 | 0.00 |
| ATOM | 256 | C    | GLN | 16 | -9.073  | 2.475 | -3.111 | 1.00 | 0.00 |
| ATOM | 257 | O    | GLN | 16 | -9.843  | 1.641 | -2.626 | 1.00 | 0.00 |
| ATOM | 258 | N    | MET | 17 | -7.818  | 2.200 | -3.459 | 1.00 | 0.00 |
| ATOM | 259 | H    | MET | 17 | -7.243  | 2.913 | -3.885 | 1.00 | 0.00 |
| ATOM | 260 | CA   | MET | 17 | -7.252  | 0.867 | -3.288 | 1.00 | 0.00 |
| ATOM | 261 | HA   | MET | 17 | -7.890  | 0.126 | -3.770 | 1.00 | 0.00 |
| ATOM | 262 | CB   | MET | 17 | -5.857  | 0.801 | -3.924 | 1.00 | 0.00 |

|      |     |         |    |        |        |        |      |      |
|------|-----|---------|----|--------|--------|--------|------|------|
| ATOM | 263 | HB2 MET | 17 | -5.701 | -0.198 | -4.332 | 1.00 | 0.00 |
| ATOM | 264 | HB3 MET | 17 | -5.800 | 1.534  | -4.728 | 1.00 | 0.00 |
| ATOM | 265 | CG MET  | 17 | -4.776 | 1.100  | -2.884 | 1.00 | 0.00 |
| ATOM | 266 | HG2 MET | 17 | -5.106 | 1.901  | -2.223 | 1.00 | 0.00 |
| ATOM | 267 | HG3 MET | 17 | -4.569 | 0.206  | -2.295 | 1.00 | 0.00 |
| ATOM | 268 | SD MET  | 17 | -3.267 | 1.614  | -3.732 | 1.00 | 0.00 |
| ATOM | 269 | CE MET  | 17 | -3.897 | 3.189  | -4.360 | 1.00 | 0.00 |
| ATOM | 270 | HE1 MET | 17 | -4.200 | 3.819  | -3.524 | 1.00 | 0.00 |
| ATOM | 271 | HE2 MET | 17 | -3.115 | 3.692  | -4.929 | 1.00 | 0.00 |
| ATOM | 272 | HE3 MET | 17 | -4.755 | 3.006  | -5.006 | 1.00 | 0.00 |
| ATOM | 273 | C MET   | 17 | -7.170 | 0.476  | -1.821 | 1.00 | 0.00 |
| ATOM | 274 | O MET   | 17 | -7.169 | -0.706 | -1.493 | 1.00 | 0.00 |
| ATOM | 275 | N LEU   | 18 | -7.088 | 1.477  | -0.953 | 1.00 | 0.00 |
| ATOM | 276 | H LEU   | 18 | -7.073 | 2.431  | -1.284 | 1.00 | 0.00 |
| ATOM | 277 | CA LEU  | 18 | -6.977 | 1.242  | 0.484  | 1.00 | 0.00 |
| ATOM | 278 | HA LEU  | 18 | -6.079 | 0.661  | 0.697  | 1.00 | 0.00 |
| ATOM | 279 | CB LEU  | 18 | -6.889 | 2.564  | 1.230  | 1.00 | 0.00 |
| ATOM | 280 | HB2 LEU | 18 | -7.810 | 3.125  | 1.074  | 1.00 | 0.00 |
| ATOM | 281 | HB3 LEU | 18 | -6.755 | 2.375  | 2.295  | 1.00 | 0.00 |
| ATOM | 282 | CG LEU  | 18 | -5.702 | 3.376  | 0.703  | 1.00 | 0.00 |
| ATOM | 283 | HG LEU  | 18 | -4.846 | 2.716  | 0.560  | 1.00 | 0.00 |
| ATOM | 284 | CD1 LEU | 18 | -6.075 | 4.025  | -0.634 | 1.00 | 0.00 |

|      |     |      |     |    |         |        |        |      |      |
|------|-----|------|-----|----|---------|--------|--------|------|------|
| ATOM | 285 | HD11 | LEU | 18 | -6.930  | 4.685  | -0.491 | 1.00 | 0.00 |
| ATOM | 286 | HD12 | LEU | 18 | -5.229  | 4.602  | -1.007 | 1.00 | 0.00 |
| ATOM | 287 | HD13 | LEU | 18 | -6.331  | 3.249  | -1.356 | 1.00 | 0.00 |
| ATOM | 288 | CD2  | LEU | 18 | -5.335  | 4.464  | 1.717  | 1.00 | 0.00 |
| ATOM | 289 | HD21 | LEU | 18 | -5.064  | 4.000  | 2.666  | 1.00 | 0.00 |
| ATOM | 290 | HD22 | LEU | 18 | -4.490  | 5.041  | 1.342  | 1.00 | 0.00 |
| ATOM | 291 | HD23 | LEU | 18 | -6.188  | 5.125  | 1.867  | 1.00 | 0.00 |
| ATOM | 292 | C    | LEU | 18 | -8.163  | 0.440  | 1.002  | 1.00 | 0.00 |
| ATOM | 293 | O    | LEU | 18 | -8.056  | -0.223 | 2.025  | 1.00 | 0.00 |
| ATOM | 294 | N    | SER | 19 | -9.292  | 0.490  | 0.299  | 1.00 | 0.00 |
| ATOM | 295 | H    | SER | 19 | -9.370  | 1.059  | -0.532 | 1.00 | 0.00 |
| ATOM | 296 | CA   | SER | 19 | -10.459 | -0.274 | 0.727  | 1.00 | 0.00 |
| ATOM | 297 | HA   | SER | 19 | -10.698 | -0.038 | 1.764  | 1.00 | 0.00 |
| ATOM | 298 | CB   | SER | 19 | -11.667 | 0.074  | -0.146 | 1.00 | 0.00 |
| ATOM | 299 | HB2  | SER | 19 | -11.494 | -0.272 | -1.165 | 1.00 | 0.00 |
| ATOM | 300 | HB3  | SER | 19 | -12.559 | -0.409 | 0.254  | 1.00 | 0.00 |
| ATOM | 301 | OG   | SER | 19 | -11.852 | 1.484  | -0.149 | 1.00 | 0.00 |
| ATOM | 302 | HG   | SER | 19 | -12.609 | 1.706  | -0.696 | 1.00 | 0.00 |
| ATOM | 303 | C    | SER | 19 | -10.150 | -1.766 | 0.613  | 1.00 | 0.00 |
| ATOM | 304 | O    | SER | 19 | -10.264 | -2.524 | 1.584  | 1.00 | 0.00 |
| ATOM | 305 | N    | HIE | 20 | -9.717  | -2.166 | -0.581 | 1.00 | 0.00 |
| ATOM | 306 | H    | HIE | 20 | -9.642  | -1.502 | -1.338 | 1.00 | 0.00 |

|      |     |     |     |    |         |        |        |      |      |
|------|-----|-----|-----|----|---------|--------|--------|------|------|
| ATOM | 307 | CA  | HIE | 20 | -9.350  | -3.554 | -0.839 | 1.00 | 0.00 |
| ATOM | 308 | HA  | HIE | 20 | -10.126 | -4.220 | -0.462 | 1.00 | 0.00 |
| ATOM | 309 | CB  | HIE | 20 | -9.191  | -3.791 | -2.348 | 1.00 | 0.00 |
| ATOM | 310 | HB2 | HIE | 20 | -8.154  | -3.755 | -2.681 | 1.00 | 0.00 |
| ATOM | 311 | HB3 | HIE | 20 | -9.633  | -4.743 | -2.641 | 1.00 | 0.00 |
| ATOM | 312 | CG  | HIE | 20 | -9.926  | -2.721 | -3.110 | 1.00 | 0.00 |
| ATOM | 313 | ND1 | HIE | 20 | -9.273  | -1.832 | -3.948 | 1.00 | 0.00 |
| ATOM | 314 | CE1 | HIE | 20 | -10.198 | -0.997 | -4.454 | 1.00 | 0.00 |
| ATOM | 315 | HE1 | HIE | 20 | -9.851  | -0.226 | -5.142 | 1.00 | 0.00 |
| ATOM | 316 | NE2 | HIE | 20 | -11.421 | -1.280 | -4.000 | 1.00 | 0.00 |
| ATOM | 317 | HE2 | HIE | 20 | -12.304 | -0.832 | -4.198 | 1.00 | 0.00 |
| ATOM | 318 | CD2 | HIE | 20 | -11.252 | -2.370 | -3.152 | 1.00 | 0.00 |
| ATOM | 319 | HD2 | HIE | 20 | -12.113 | -2.805 | -2.645 | 1.00 | 0.00 |
| ATOM | 320 | C   | HIE | 20 | -8.039  | -3.853 | -0.131 | 1.00 | 0.00 |
| ATOM | 321 | O   | HIE | 20 | -7.825  | -4.948 | 0.388  | 1.00 | 0.00 |
| ATOM | 322 | N   | CYX | 21 | -7.172  | -2.847 | -0.109 | 1.00 | 0.00 |
| ATOM | 323 | H   | CYX | 21 | -7.395  | -1.984 | -0.583 | 1.00 | 0.00 |
| ATOM | 324 | CA  | CYX | 21 | -5.882  | -2.959 | 0.543  | 1.00 | 0.00 |
| ATOM | 325 | HA  | CYX | 21 | -5.309  | -3.786 | 0.124  | 1.00 | 0.00 |
| ATOM | 326 | CB  | CYX | 21 | -5.101  | -1.657 | 0.317  | 1.00 | 0.00 |
| ATOM | 327 | HB2 | CYX | 21 | -5.790  | -0.866 | 0.024  | 1.00 | 0.00 |
| ATOM | 328 | HB3 | CYX | 21 | -4.593  | -1.373 | 1.239  | 1.00 | 0.00 |



|      |     |      |     |    |         |        |        |      |      |
|------|-----|------|-----|----|---------|--------|--------|------|------|
| ATOM | 329 | SG   | CYX | 21 | -3.905  | -1.917 | -1.018 | 1.00 | 0.00 |
| ATOM | 330 | C    | CYX | 21 | -6.084  | -3.238 | 2.032  | 1.00 | 0.00 |
| ATOM | 331 | O    | CYX | 21 | -5.471  | -4.147 | 2.594  | 1.00 | 0.00 |
| ATOM | 332 | N    | ARG | 22 | -6.984  | -2.481 | 2.653  | 1.00 | 0.00 |
| ATOM | 333 | H    | ARG | 22 | -7.460  | -1.739 | 2.161  | 1.00 | 0.00 |
| ATOM | 334 | CA   | ARG | 22 | -7.300  | -2.690 | 4.059  | 1.00 | 0.00 |
| ATOM | 335 | HA   | ARG | 22 | -6.408  | -2.538 | 4.667  | 1.00 | 0.00 |
| ATOM | 336 | CB   | ARG | 22 | -8.376  | -1.699 | 4.512  | 1.00 | 0.00 |
| ATOM | 337 | HB2  | ARG | 22 | -8.077  | -0.690 | 4.229  | 1.00 | 0.00 |
| ATOM | 338 | HB3  | ARG | 22 | -9.320  | -1.948 | 4.028  | 1.00 | 0.00 |
| ATOM | 339 | CG   | ARG | 22 | -8.548  | -1.772 | 6.032  | 1.00 | 0.00 |
| ATOM | 340 | HG2  | ARG | 22 | -8.767  | -2.799 | 6.325  | 1.00 | 0.00 |
| ATOM | 341 | HG3  | ARG | 22 | -7.629  | -1.445 | 6.519  | 1.00 | 0.00 |
| ATOM | 342 | CD   | ARG | 22 | -9.704  | -0.862 | 6.459  | 1.00 | 0.00 |
| ATOM | 343 | HD2  | ARG | 22 | -10.645 | -1.250 | 6.069  | 1.00 | 0.00 |
| ATOM | 344 | HD3  | ARG | 22 | -9.755  | -0.813 | 7.547  | 1.00 | 0.00 |
| ATOM | 345 | NE   | ARG | 22 | -9.502  | 0.489  | 5.938  | 1.00 | 0.00 |
| ATOM | 346 | HE   | ARG | 22 | -8.880  | 1.126  | 6.416  | 1.00 | 0.00 |
| ATOM | 347 | CZ   | ARG | 22 | -10.124 | 0.913  | 4.835  | 1.00 | 0.00 |
| ATOM | 348 | NH1  | ARG | 22 | -10.953 | 0.127  | 4.200  | 1.00 | 0.00 |
| ATOM | 349 | HH11 | ARG | 22 | -11.124 | -0.807 | 4.546  | 1.00 | 0.00 |
| ATOM | 350 | HH12 | ARG | 22 | -11.418 | 0.456  | 3.367  | 1.00 | 0.00 |

|      |     |          |    |         |        |        |      |      |
|------|-----|----------|----|---------|--------|--------|------|------|
| ATOM | 351 | NH2 ARG  | 22 | -9.903  | 2.118  | 4.386  | 1.00 | 0.00 |
| ATOM | 352 | HH21 ARG | 22 | -9.261  | 2.726  | 4.875  | 1.00 | 0.00 |
| ATOM | 353 | HH22 ARG | 22 | -10.374 | 2.437  | 3.552  | 1.00 | 0.00 |
| ATOM | 354 | C ARG    | 22 | -7.797  | -4.116 | 4.230  | 1.00 | 0.00 |
| ATOM | 355 | O ARG    | 22 | -7.367  | -4.843 | 5.133  | 1.00 | 0.00 |
| ATOM | 356 | N MET    | 23 | -8.688  | -4.522 | 3.319  | 1.00 | 0.00 |
| ATOM | 357 | H MET    | 23 | -9.024  | -3.892 | 2.606  | 1.00 | 0.00 |
| ATOM | 358 | CA MET   | 23 | -9.212  | -5.877 | 3.344  | 1.00 | 0.00 |
| ATOM | 359 | HA MET   | 23 | -9.762  | -6.045 | 4.270  | 1.00 | 0.00 |
| ATOM | 360 | CB MET   | 23 | -10.162 | -6.102 | 2.161  | 1.00 | 0.00 |
| ATOM | 361 | HB2 MET  | 23 | -10.915 | -5.314 | 2.148  | 1.00 | 0.00 |
| ATOM | 362 | HB3 MET  | 23 | -9.593  | -6.076 | 1.232  | 1.00 | 0.00 |
| ATOM | 363 | CG MET   | 23 | -10.850 | -7.462 | 2.300  | 1.00 | 0.00 |
| ATOM | 364 | HG2 MET  | 23 | -10.099 | -8.248 | 2.385  | 1.00 | 0.00 |
| ATOM | 365 | HG3 MET  | 23 | -11.481 | -7.467 | 3.189  | 1.00 | 0.00 |
| ATOM | 366 | SD MET   | 23 | -11.875 | -7.772 | 0.840  | 1.00 | 0.00 |
| ATOM | 367 | CE MET   | 23 | -10.528 | -8.097 | -0.326 | 1.00 | 0.00 |
| ATOM | 368 | HE1 MET  | 23 | -9.945  | -8.951 | 0.020  | 1.00 | 0.00 |
| ATOM | 369 | HE2 MET  | 23 | -10.943 | -8.316 | -1.310 | 1.00 | 0.00 |
| ATOM | 370 | HE3 MET  | 23 | -9.883  | -7.221 | -0.391 | 1.00 | 0.00 |
| ATOM | 371 | C MET    | 23 | -8.047  | -6.857 | 3.275  | 1.00 | 0.00 |
| ATOM | 372 | O MET    | 23 | -8.047  | -7.885 | 3.949  | 1.00 | 0.00 |

|      |     |     |     |    |        |        |       |      |      |
|------|-----|-----|-----|----|--------|--------|-------|------|------|
| ATOM | 373 | N   | TYR | 24 | -7.045 | -6.508 | 2.464 | 1.00 | 0.00 |
| ATOM | 374 | H   | TYR | 24 | -7.119 | -5.675 | 1.898 | 1.00 | 0.00 |
| ATOM | 375 | CA  | TYR | 24 | -5.854 | -7.338 | 2.321 | 1.00 | 0.00 |
| ATOM | 376 | HA  | TYR | 24 | -6.130 | -8.335 | 1.976 | 1.00 | 0.00 |
| ATOM | 377 | CB  | TYR | 24 | -4.896 | -6.707 | 1.289 | 1.00 | 0.00 |
| ATOM | 378 | HB2 | TYR | 24 | -4.888 | -7.322 | 0.389 | 1.00 | 0.00 |
| ATOM | 379 | HB3 | TYR | 24 | -5.275 | -5.714 | 1.048 | 1.00 | 0.00 |
| ATOM | 380 | CG  | TYR | 24 | -3.483 | -6.590 | 1.833 | 1.00 | 0.00 |
| ATOM | 381 | CD1 | TYR | 24 | -2.786 | -7.732 | 2.244 | 1.00 | 0.00 |
| ATOM | 382 | HD1 | TYR | 24 | -3.260 | -8.712 | 2.183 | 1.00 | 0.00 |
| ATOM | 383 | CE1 | TYR | 24 | -1.479 | -7.616 | 2.734 | 1.00 | 0.00 |
| ATOM | 384 | HE1 | TYR | 24 | -0.939 | -8.505 | 3.062 | 1.00 | 0.00 |
| ATOM | 385 | CZ  | TYR | 24 | -0.868 | -6.359 | 2.807 | 1.00 | 0.00 |
| ATOM | 386 | OH  | TYR | 24 | 0.422  | -6.245 | 3.283 | 1.00 | 0.00 |
| ATOM | 387 | HH  | TYR | 24 | 0.805  | -7.089 | 3.536 | 1.00 | 0.00 |
| ATOM | 388 | CE2 | TYR | 24 | -1.562 | -5.219 | 2.394 | 1.00 | 0.00 |
| ATOM | 389 | HE2 | TYR | 24 | -1.085 | -4.241 | 2.451 | 1.00 | 0.00 |
| ATOM | 390 | CD2 | TYR | 24 | -2.869 | -5.333 | 1.907 | 1.00 | 0.00 |
| ATOM | 391 | HD2 | TYR | 24 | -3.410 | -4.444 | 1.585 | 1.00 | 0.00 |
| ATOM | 392 | C   | TYR | 24 | -5.178 | -7.509 | 3.679 | 1.00 | 0.00 |
| ATOM | 393 | O   | TYR | 24 | -4.772 | -8.609 | 4.043 | 1.00 | 0.00 |
| ATOM | 394 | N   | MET | 25 | -5.072 | -6.417 | 4.435 | 1.00 | 0.00 |

|      |     |     |     |    |        |        |       |      |      |
|------|-----|-----|-----|----|--------|--------|-------|------|------|
| ATOM | 395 | H   | MET | 25 | -5.413 | -5.523 | 4.114 | 1.00 | 0.00 |
| ATOM | 396 | CA  | MET | 25 | -4.458 | -6.489 | 5.758 | 1.00 | 0.00 |
| ATOM | 397 | HA  | MET | 25 | -3.409 | -6.773 | 5.668 | 1.00 | 0.00 |
| ATOM | 398 | CB  | MET | 25 | -4.538 | -5.127 | 6.449 | 1.00 | 0.00 |
| ATOM | 399 | HB2 | MET | 25 | -5.584 | -4.853 | 6.583 | 1.00 | 0.00 |
| ATOM | 400 | HB3 | MET | 25 | -4.052 | -5.189 | 7.423 | 1.00 | 0.00 |
| ATOM | 401 | CG  | MET | 25 | -3.836 | -4.064 | 5.594 | 1.00 | 0.00 |
| ATOM | 402 | HG2 | MET | 25 | -4.252 | -4.072 | 4.587 | 1.00 | 0.00 |
| ATOM | 403 | HG3 | MET | 25 | -3.983 | -3.081 | 6.041 | 1.00 | 0.00 |
| ATOM | 404 | SD  | MET | 25 | -2.064 | -4.419 | 5.507 | 1.00 | 0.00 |
| ATOM | 405 | CE  | MET | 25 | -1.656 | -3.971 | 7.212 | 1.00 | 0.00 |
| ATOM | 406 | HE1 | MET | 25 | -2.221 | -4.601 | 7.899 | 1.00 | 0.00 |
| ATOM | 407 | HE2 | MET | 25 | -0.589 | -4.117 | 7.381 | 1.00 | 0.00 |
| ATOM | 408 | HE3 | MET | 25 | -1.911 | -2.926 | 7.385 | 1.00 | 0.00 |
| ATOM | 409 | C   | MET | 25 | -5.203 | -7.523 | 6.597 | 1.00 | 0.00 |
| ATOM | 410 | O   | MET | 25 | -4.605 | -8.441 | 7.178 | 1.00 | 0.00 |
| ATOM | 411 | N   | ARG | 26 | -6.528 | -7.389 | 6.625 | 1.00 | 0.00 |
| ATOM | 412 | H   | ARG | 26 | -6.982 | -6.621 | 6.153 | 1.00 | 0.00 |
| ATOM | 413 | CA  | ARG | 26 | -7.355 | -8.334 | 7.358 | 1.00 | 0.00 |
| ATOM | 414 | HA  | ARG | 26 | -7.079 | -8.330 | 8.413 | 1.00 | 0.00 |
| ATOM | 415 | CB  | ARG | 26 | -8.834 | -7.946 | 7.236 | 1.00 | 0.00 |
| ATOM | 416 | HB2 | ARG | 26 | -8.965 | -6.918 | 7.572 | 1.00 | 0.00 |

|      |     |          |    |         |         |        |      |      |
|------|-----|----------|----|---------|---------|--------|------|------|
| ATOM | 417 | HB3 ARG  | 26 | -9.143  | -8.030  | 6.194  | 1.00 | 0.00 |
| ATOM | 418 | CG ARG   | 26 | -9.691  | -8.878  | 8.100  | 1.00 | 0.00 |
| ATOM | 419 | HG2 ARG  | 26 | -10.743 | -8.725  | 7.860  | 1.00 | 0.00 |
| ATOM | 420 | HG3 ARG  | 26 | -9.418  | -9.913  | 7.892  | 1.00 | 0.00 |
| ATOM | 421 | CD ARG   | 26 | -9.457  | -8.577  | 9.583  | 1.00 | 0.00 |
| ATOM | 422 | HD2 ARG  | 26 | -8.395  | -8.656  | 9.816  | 1.00 | 0.00 |
| ATOM | 423 | HD3 ARG  | 26 | -9.806  | -7.572  | 9.818  | 1.00 | 0.00 |
| ATOM | 424 | NE ARG   | 26 | -10.189 | -9.533  | 10.411 | 1.00 | 0.00 |
| ATOM | 425 | HE ARG   | 26 | -11.098 | -9.862  | 10.118 | 1.00 | 0.00 |
| ATOM | 426 | CZ ARG   | 26 | -9.686  | -9.991  | 11.558 | 1.00 | 0.00 |
| ATOM | 427 | NH1 ARG  | 26 | -8.518  | -9.585  | 11.977 | 1.00 | 0.00 |
| ATOM | 428 | HH11 ARG | 26 | -7.991  | -8.920  | 11.429 | 1.00 | 0.00 |
| ATOM | 429 | HH12 ARG | 26 | -8.146  | -9.939  | 12.847 | 1.00 | 0.00 |
| ATOM | 430 | NH2 ARG  | 26 | -10.367 | -10.850 | 12.265 | 1.00 | 0.00 |
| ATOM | 431 | HH21 ARG | 26 | -11.270 | -11.164 | 11.940 | 1.00 | 0.00 |
| ATOM | 432 | HH22 ARG | 26 | -9.987  | -11.198 | 13.134 | 1.00 | 0.00 |
| ATOM | 433 | C ARG    | 26 | -7.121  | -9.727  | 6.788  | 1.00 | 0.00 |
| ATOM | 434 | O ARG    | 26 | -7.012  | -10.714 | 7.523  | 1.00 | 0.00 |
| ATOM | 435 | N GLN    | 27 | -7.004  | -9.787  | 5.466  | 1.00 | 0.00 |
| ATOM | 436 | H GLN    | 27 | -7.128  | -8.959  | 4.901  | 1.00 | 0.00 |
| ATOM | 437 | CA GLN   | 27 | -6.739  | -11.040 | 4.796  | 1.00 | 0.00 |
| ATOM | 438 | HA GLN   | 27 | -7.533  | -11.752 | 5.021  | 1.00 | 0.00 |

|      |     |      |     |    |        |         |       |      |      |
|------|-----|------|-----|----|--------|---------|-------|------|------|
| ATOM | 439 | CB   | GLN | 27 | -6.676 | -10.840 | 3.274 | 1.00 | 0.00 |
| ATOM | 440 | HB2  | GLN | 27 | -7.654 | -10.523 | 2.914 | 1.00 | 0.00 |
| ATOM | 441 | HB3  | GLN | 27 | -5.937 | -10.072 | 3.044 | 1.00 | 0.00 |
| ATOM | 442 | CG   | GLN | 27 | -6.279 | -12.154 | 2.586 | 1.00 | 0.00 |
| ATOM | 443 | HG2  | GLN | 27 | -6.395 | -12.048 | 1.508 | 1.00 | 0.00 |
| ATOM | 444 | HG3  | GLN | 27 | -5.243 | -12.404 | 2.817 | 1.00 | 0.00 |
| ATOM | 445 | CD   | GLN | 27 | -7.172 | -13.294 | 3.062 | 1.00 | 0.00 |
| ATOM | 446 | OE1  | GLN | 27 | -8.014 | -13.786 | 2.311 | 1.00 | 0.00 |
| ATOM | 447 | NE2  | GLN | 27 | -7.039 | -13.735 | 4.282 | 1.00 | 0.00 |
| ATOM | 448 | HE21 | GLN | 27 | -7.624 | -14.490 | 4.610 | 1.00 | 0.00 |
| ATOM | 449 | HE22 | GLN | 27 | -6.351 | -13.320 | 4.894 | 1.00 | 0.00 |
| ATOM | 450 | C    | GLN | 27 | -5.432 | -11.611 | 5.316 | 1.00 | 0.00 |
| ATOM | 451 | O    | GLN | 27 | -5.298 | -12.809 | 5.514 | 1.00 | 0.00 |
| ATOM | 452 | N    | GLN | 28 | -4.467 | -10.749 | 5.572 | 1.00 | 0.00 |
| ATOM | 453 | H    | GLN | 28 | -4.576 | -9.757  | 5.420 | 1.00 | 0.00 |
| ATOM | 454 | CA   | GLN | 28 | -3.212 | -11.225 | 6.085 | 1.00 | 0.00 |
| ATOM | 455 | HA   | GLN | 28 | -2.748 | -11.910 | 5.375 | 1.00 | 0.00 |
| ATOM | 456 | CB   | GLN | 28 | -2.283 | -10.056 | 6.306 | 1.00 | 0.00 |
| ATOM | 457 | HB2  | GLN | 28 | -2.230 | -9.465  | 5.392 | 1.00 | 0.00 |
| ATOM | 458 | HB3  | GLN | 28 | -2.672 | -9.439  | 7.116 | 1.00 | 0.00 |
| ATOM | 459 | CG   | GLN | 28 | -0.881 | -10.555 | 6.673 | 1.00 | 0.00 |
| ATOM | 460 | HG2  | GLN | 28 | -0.641 | -11.446 | 6.093 | 1.00 | 0.00 |

|      |     |      |     |    |        |         |        |      |      |
|------|-----|------|-----|----|--------|---------|--------|------|------|
| ATOM | 461 | HG3  | GLN | 28 | -0.145 | -9.778  | 6.466  | 1.00 | 0.00 |
| ATOM | 462 | CD   | GLN | 28 | -0.814 | -10.907 | 8.157  | 1.00 | 0.00 |
| ATOM | 463 | OE1  | GLN | 28 | -0.376 | -12.082 | 8.519  | 1.00 | 0.00 |
| ATOM | 464 | NE2  | GLN | 28 | -1.170 | -10.091 | 9.008  | 1.00 | 0.00 |
| ATOM | 465 | HE21 | GLN | 28 | -1.121 | -10.334 | 9.988  | 1.00 | 0.00 |
| ATOM | 466 | HE22 | GLN | 28 | -1.508 | -9.184  | 8.723  | 1.00 | 0.00 |
| ATOM | 467 | C    | GLN | 28 | -3.454 | -11.942 | 7.402  | 1.00 | 0.00 |
| ATOM | 468 | O    | GLN | 28 | -2.847 | -12.978 | 7.678  | 1.00 | 0.00 |
| ATOM | 469 | N    | MET | 29 | -4.359 | -11.386 | 8.210  | 1.00 | 0.00 |
| ATOM | 470 | H    | MET | 29 | -4.823 | -10.525 | 7.961  | 1.00 | 0.00 |
| ATOM | 471 | CA   | MET | 29 | -4.680 | -11.999 | 9.496  | 1.00 | 0.00 |
| ATOM | 472 | HA   | MET | 29 | -3.780 | -12.063 | 10.109 | 1.00 | 0.00 |
| ATOM | 473 | CB   | MET | 29 | -5.724 | -11.164 | 10.245 | 1.00 | 0.00 |
| ATOM | 474 | HB2  | MET | 29 | -6.535 | -10.904 | 9.566  | 1.00 | 0.00 |
| ATOM | 475 | HB3  | MET | 29 | -6.120 | -11.743 | 11.079 | 1.00 | 0.00 |
| ATOM | 476 | CG   | MET | 29 | -5.075 | -9.885  | 10.776 | 1.00 | 0.00 |
| ATOM | 477 | HG2  | MET | 29 | -4.695 | -9.289  | 9.947  | 1.00 | 0.00 |
| ATOM | 478 | HG3  | MET | 29 | -5.806 | -9.303  | 11.337 | 1.00 | 0.00 |
| ATOM | 479 | SD   | MET | 29 | -3.702 | -10.327 | 11.869 | 1.00 | 0.00 |
| ATOM | 480 | CE   | MET | 29 | -4.662 | -11.278 | 13.076 | 1.00 | 0.00 |
| ATOM | 481 | HE1  | MET | 29 | -5.144 | -12.118 | 12.577 | 1.00 | 0.00 |
| ATOM | 482 | HE2  | MET | 29 | -3.998 | -11.652 | 13.856 | 1.00 | 0.00 |

|      |     |     |     |    |         |         |        |      |      |
|------|-----|-----|-----|----|---------|---------|--------|------|------|
| ATOM | 483 | HE3 | MET | 29 | -5.421  | -10.637 | 13.524 | 1.00 | 0.00 |
| ATOM | 484 | C   | MET | 29 | -5.211  | -13.414 | 9.291  | 1.00 | 0.00 |
| ATOM | 485 | O   | MET | 29 | -4.666  | -14.370 | 9.840  | 1.00 | 0.00 |
| ATOM | 486 | N   | GLU | 30 | -6.264  | -13.551 | 8.485  | 1.00 | 0.00 |
| ATOM | 487 | H   | GLU | 30 | -6.710  | -12.750 | 8.063  | 1.00 | 0.00 |
| ATOM | 488 | CA  | GLU | 30 | -6.822  | -14.878 | 8.217  | 1.00 | 0.00 |
| ATOM | 489 | HA  | GLU | 30 | -7.029  | -15.388 | 9.158  | 1.00 | 0.00 |
| ATOM | 490 | CB  | GLU | 30 | -8.128  | -14.763 | 7.424  | 1.00 | 0.00 |
| ATOM | 491 | HB2 | GLU | 30 | -7.962  | -14.145 | 6.542  | 1.00 | 0.00 |
| ATOM | 492 | HB3 | GLU | 30 | -8.451  | -15.757 | 7.115  | 1.00 | 0.00 |
| ATOM | 493 | CG  | GLU | 30 | -9.210  | -14.124 | 8.299  | 1.00 | 0.00 |
| ATOM | 494 | HG2 | GLU | 30 | -10.191 | -14.475 | 7.980  | 1.00 | 0.00 |
| ATOM | 495 | HG3 | GLU | 30 | -9.040  | -14.415 | 9.336  | 1.00 | 0.00 |
| ATOM | 496 | CD  | GLU | 30 | -9.151  | -12.605 | 8.182  | 1.00 | 0.00 |
| ATOM | 497 | OE1 | GLU | 30 | -9.292  | -12.110 | 7.075  | 1.00 | 0.00 |
| ATOM | 498 | OE2 | GLU | 30 | -8.974  | -11.958 | 9.202  | 1.00 | 0.00 |
| ATOM | 499 | C   | GLU | 30 | -5.823  | -15.730 | 7.435  | 1.00 | 0.00 |
| ATOM | 500 | O   | GLU | 30 | -5.640  | -16.915 | 7.712  | 1.00 | 0.00 |
| ATOM | 501 | N   | GLU | 31 | -5.189  | -15.100 | 6.448  | 1.00 | 0.00 |
| ATOM | 502 | H   | GLU | 31 | -5.410  | -14.134 | 6.257  | 1.00 | 0.00 |
| ATOM | 503 | CA  | GLU | 31 | -4.207  | -15.768 | 5.596  | 1.00 | 0.00 |
| ATOM | 504 | HA  | GLU | 31 | -4.617  | -16.700 | 5.206  | 1.00 | 0.00 |



|      |     |     |     |    |        |         |        |      |      |
|------|-----|-----|-----|----|--------|---------|--------|------|------|
| ATOM | 505 | CB  | GLU | 31 | -3.847 | -14.859 | 4.415  | 1.00 | 0.00 |
| ATOM | 506 | HB2 | GLU | 31 | -4.755 | -14.398 | 4.028  | 1.00 | 0.00 |
| ATOM | 507 | HB3 | GLU | 31 | -3.163 | -14.082 | 4.756  | 1.00 | 0.00 |
| ATOM | 508 | CG  | GLU | 31 | -3.176 | -15.679 | 3.305  | 1.00 | 0.00 |
| ATOM | 509 | HG2 | GLU | 31 | -2.318 | -16.205 | 3.723  | 1.00 | 0.00 |
| ATOM | 510 | HG3 | GLU | 31 | -3.893 | -16.404 | 2.919  | 1.00 | 0.00 |
| ATOM | 511 | CD  | GLU | 31 | -2.710 | -14.767 | 2.167  | 1.00 | 0.00 |
| ATOM | 512 | OE1 | GLU | 31 | -2.851 | -13.559 | 2.293  | 1.00 | 0.00 |
| ATOM | 513 | OE2 | GLU | 31 | -2.216 | -15.293 | 1.182  | 1.00 | 0.00 |
| ATOM | 514 | C   | GLU | 31 | -2.942 | -16.132 | 6.381  | 1.00 | 0.00 |
| ATOM | 515 | O   | GLU | 31 | -2.036 | -16.758 | 5.839  | 1.00 | 0.00 |
| ATOM | 516 | N   | SER | 32 | -2.881 | -15.726 | 7.651  | 1.00 | 0.00 |
| ATOM | 517 | H   | SER | 32 | -3.641 | -15.193 | 8.049  | 1.00 | 0.00 |
| ATOM | 518 | CA  | SER | 32 | -1.713 | -16.005 | 8.493  | 1.00 | 0.00 |
| ATOM | 519 | HA  | SER | 32 | -0.886 | -15.353 | 8.212  | 1.00 | 0.00 |
| ATOM | 520 | CB  | SER | 32 | -2.054 | -15.756 | 9.962  | 1.00 | 0.00 |
| ATOM | 521 | HB2 | SER | 32 | -1.170 | -15.931 | 10.576 | 1.00 | 0.00 |
| ATOM | 522 | HB3 | SER | 32 | -2.386 | -14.726 | 10.090 | 1.00 | 0.00 |
| ATOM | 523 | OG  | SER | 32 | -3.092 | -16.642 | 10.362 | 1.00 | 0.00 |
| ATOM | 524 | HG  | SER | 32 | -3.307 | -16.487 | 11.285 | 1.00 | 0.00 |
| ATOM | 525 | C   | SER | 32 | -1.244 | -17.446 | 8.312  | 1.00 | 0.00 |
| ATOM | 526 | O   | SER | 32 | -0.086 | -17.768 | 8.577  | 1.00 | 0.00 |

|      |     |      |     |    |        |         |       |      |      |
|------|-----|------|-----|----|--------|---------|-------|------|------|
| ATOM | 527 | N    | THR | 33 | -2.152 | -18.304 | 7.860 | 1.00 | 0.00 |
| ATOM | 528 | H    | THR | 33 | -3.101 | -18.000 | 7.698 | 1.00 | 0.00 |
| ATOM | 529 | CA   | THR | 33 | -1.824 | -19.702 | 7.617 | 1.00 | 0.00 |
| ATOM | 530 | HA   | THR | 33 | -1.192 | -20.087 | 8.418 | 1.00 | 0.00 |
| ATOM | 531 | CB   | THR | 33 | -3.111 | -20.533 | 7.567 | 1.00 | 0.00 |
| ATOM | 532 | HB   | THR | 33 | -2.867 | -21.564 | 7.308 | 1.00 | 0.00 |
| ATOM | 533 | CG2  | THR | 33 | -3.799 | -20.500 | 8.934 | 1.00 | 0.00 |
| ATOM | 534 | HG21 | THR | 33 | -4.044 | -19.470 | 9.194 | 1.00 | 0.00 |
| ATOM | 535 | HG22 | THR | 33 | -4.713 | -21.092 | 8.896 | 1.00 | 0.00 |
| ATOM | 536 | HG23 | THR | 33 | -3.130 | -20.915 | 9.688 | 1.00 | 0.00 |
| ATOM | 537 | OG1  | THR | 33 | -3.985 | -19.993 | 6.584 | 1.00 | 0.00 |
| ATOM | 538 | HG1  | THR | 33 | -4.791 | -20.513 | 6.553 | 1.00 | 0.00 |
| ATOM | 539 | C    | THR | 33 | -1.047 | -19.876 | 6.300 | 1.00 | 0.00 |
| ATOM | 540 | O    | THR | 33 | 0.060  | -20.414 | 6.285 | 1.00 | 0.00 |
| ATOM | 541 | N    | TYR | 34 | -1.676 | -19.455 | 5.193 | 1.00 | 0.00 |
| ATOM | 542 | H    | TYR | 34 | -2.598 | -19.052 | 5.277 | 1.00 | 0.00 |
| ATOM | 543 | CA   | TYR | 34 | -1.096 | -19.598 | 3.846 | 1.00 | 0.00 |
| ATOM | 544 | HA   | TYR | 34 | -0.309 | -20.353 | 3.849 | 1.00 | 0.00 |
| ATOM | 545 | CB   | TYR | 34 | -2.191 | -20.036 | 2.869 | 1.00 | 0.00 |
| ATOM | 546 | HB2  | TYR | 34 | -2.960 | -19.266 | 2.813 | 1.00 | 0.00 |
| ATOM | 547 | HB3  | TYR | 34 | -1.754 | -20.185 | 1.882 | 1.00 | 0.00 |
| ATOM | 548 | CG   | TYR | 34 | -2.808 | -21.330 | 3.347 | 1.00 | 0.00 |

|      |     |         |    |        |         |       |      |      |
|------|-----|---------|----|--------|---------|-------|------|------|
| ATOM | 549 | CD1 TYR | 34 | -2.130 | -22.541 | 3.160 | 1.00 | 0.00 |
| ATOM | 550 | HD1 TYR | 34 | -1.157 | -22.551 | 2.668 | 1.00 | 0.00 |
| ATOM | 551 | CE1 TYR | 34 | -2.701 | -23.739 | 3.605 | 1.00 | 0.00 |
| ATOM | 552 | HE1 TYR | 34 | -2.173 | -24.682 | 3.459 | 1.00 | 0.00 |
| ATOM | 553 | CZ TYR  | 34 | -3.950 | -23.727 | 4.238 | 1.00 | 0.00 |
| ATOM | 554 | OH TYR  | 34 | -4.512 | -24.908 | 4.676 | 1.00 | 0.00 |
| ATOM | 555 | HH TYR  | 34 | -3.962 | -25.675 | 4.496 | 1.00 | 0.00 |
| ATOM | 556 | CE2 TYR | 34 | -4.627 | -22.516 | 4.425 | 1.00 | 0.00 |
| ATOM | 557 | HE2 TYR | 34 | -5.599 | -22.507 | 4.918 | 1.00 | 0.00 |
| ATOM | 558 | CD2 TYR | 34 | -4.057 | -21.319 | 3.981 | 1.00 | 0.00 |
| ATOM | 559 | HD2 TYR | 34 | -4.584 | -20.377 | 4.128 | 1.00 | 0.00 |
| ATOM | 560 | C TYR   | 34 | -0.431 | -18.320 | 3.305 | 1.00 | 0.00 |
| ATOM | 561 | O TYR   | 34 | -0.047 | -18.288 | 2.135 | 1.00 | 0.00 |
| ATOM | 562 | N GLN   | 35 | -0.341 | -17.266 | 4.119 | 1.00 | 0.00 |
| ATOM | 563 | H GLN   | 35 | -0.696 | -17.322 | 5.063 | 1.00 | 0.00 |
| ATOM | 564 | CA GLN  | 35 | 0.239  | -15.986 | 3.664 | 1.00 | 0.00 |
| ATOM | 565 | HA GLN  | 35 | -0.531 | -15.401 | 3.163 | 1.00 | 0.00 |
| ATOM | 566 | CB GLN  | 35 | 0.791  | -15.167 | 4.837 | 1.00 | 0.00 |
| ATOM | 567 | HB2 GLN | 35 | 0.996  | -14.153 | 4.495 | 1.00 | 0.00 |
| ATOM | 568 | HB3 GLN | 35 | 0.045  | -15.139 | 5.632 | 1.00 | 0.00 |
| ATOM | 569 | CG GLN  | 35 | 2.086  | -15.797 | 5.373 | 1.00 | 0.00 |
| ATOM | 570 | HG2 GLN | 35 | 2.806  | -15.925 | 4.564 | 1.00 | 0.00 |

|      |     |      |     |    |       |         |       |      |      |
|------|-----|------|-----|----|-------|---------|-------|------|------|
| ATOM | 571 | HG3  | GLN | 35 | 2.516 | -15.156 | 6.143 | 1.00 | 0.00 |
| ATOM | 572 | CD   | GLN | 35 | 1.794 | -17.160 | 5.983 | 1.00 | 0.00 |
| ATOM | 573 | OE1  | GLN | 35 | 0.591 | -17.418 | 6.400 | 1.00 | 0.00 |
| ATOM | 574 | NE2  | GLN | 35 | 2.680 | -18.008 | 6.076 | 1.00 | 0.00 |
| ATOM | 575 | HE21 | GLN | 35 | 2.472 | -18.909 | 6.483 | 1.00 | 0.00 |
| ATOM | 576 | HE22 | GLN | 35 | 3.611 | -17.800 | 5.745 | 1.00 | 0.00 |
| ATOM | 577 | C    | GLN | 35 | 1.363 | -16.169 | 2.655 | 1.00 | 0.00 |
| ATOM | 578 | O    | GLN | 35 | 1.555 | -15.313 | 1.790 | 1.00 | 0.00 |
| ATOM | 579 | N    | THR | 36 | 2.111 | -17.263 | 2.757 | 1.00 | 0.00 |
| ATOM | 580 | H    | THR | 36 | 1.956 | -17.956 | 3.475 | 1.00 | 0.00 |
| ATOM | 581 | CA   | THR | 36 | 3.201 | -17.473 | 1.822 | 1.00 | 0.00 |
| ATOM | 582 | HA   | THR | 36 | 3.924 | -16.661 | 1.901 | 1.00 | 0.00 |
| ATOM | 583 | CB   | THR | 36 | 3.913 | -18.794 | 2.132 | 1.00 | 0.00 |
| ATOM | 584 | HB   | THR | 36 | 3.237 | -19.625 | 1.930 | 1.00 | 0.00 |
| ATOM | 585 | CG2  | THR | 36 | 5.161 | -18.927 | 1.255 | 1.00 | 0.00 |
| ATOM | 586 | HG21 | THR | 36 | 5.838 | -18.097 | 1.457 | 1.00 | 0.00 |
| ATOM | 587 | HG22 | THR | 36 | 5.665 | -19.868 | 1.479 | 1.00 | 0.00 |
| ATOM | 588 | HG23 | THR | 36 | 4.871 | -18.912 | 0.205 | 1.00 | 0.00 |
| ATOM | 589 | OG1  | THR | 36 | 4.291 | -18.814 | 3.501 | 1.00 | 0.00 |
| ATOM | 590 | HG1  | THR | 36 | 4.738 | -19.641 | 3.698 | 1.00 | 0.00 |
| ATOM | 591 | C    | THR | 36 | 2.639 | -17.502 | 0.407 | 1.00 | 0.00 |
| ATOM | 592 | O    | THR | 36 | 1.979 | -18.459 | 0.003 | 1.00 | 0.00 |

|      |     |     |     |    |        |         |        |      |      |
|------|-----|-----|-----|----|--------|---------|--------|------|------|
| ATOM | 593 | N   | MET | 37 | 2.899  | -16.426 | -0.327 | 1.00 | 0.00 |
| ATOM | 594 | H   | MET | 37 | 3.428  | -15.661 | 0.067  | 1.00 | 0.00 |
| ATOM | 595 | CA  | MET | 37 | 2.412  | -16.297 | -1.697 | 1.00 | 0.00 |
| ATOM | 596 | HA  | MET | 37 | 1.326  | -16.381 | -1.719 | 1.00 | 0.00 |
| ATOM | 597 | CB  | MET | 37 | 2.809  | -14.929 | -2.259 | 1.00 | 0.00 |
| ATOM | 598 | HB2 | MET | 37 | 3.886  | -14.793 | -2.154 | 1.00 | 0.00 |
| ATOM | 599 | HB3 | MET | 37 | 2.538  | -14.878 | -3.313 | 1.00 | 0.00 |
| ATOM | 600 | CG  | MET | 37 | 2.077  | -13.824 | -1.490 | 1.00 | 0.00 |
| ATOM | 601 | HG2 | MET | 37 | 2.090  | -14.048 | -0.423 | 1.00 | 0.00 |
| ATOM | 602 | HG3 | MET | 37 | 2.568  | -12.867 | -1.665 | 1.00 | 0.00 |
| ATOM | 603 | SD  | MET | 37 | 0.360  | -13.726 | -2.058 | 1.00 | 0.00 |
| ATOM | 604 | CE  | MET | 37 | 0.640  | -12.597 | -3.444 | 1.00 | 0.00 |
| ATOM | 605 | HE1 | MET | 37 | 1.336  | -13.052 | -4.149 | 1.00 | 0.00 |
| ATOM | 606 | HE2 | MET | 37 | -0.306 | -12.396 | -3.946 | 1.00 | 0.00 |
| ATOM | 607 | HE3 | MET | 37 | 1.059  | -11.662 | -3.072 | 1.00 | 0.00 |
| ATOM | 608 | C   | MET | 37 | 2.976  | -17.402 | -2.590 | 1.00 | 0.00 |
| ATOM | 609 | O   | MET | 37 | 4.182  | -17.458 | -2.831 | 1.00 | 0.00 |
| ATOM | 610 | N   | PRO | 38 | 2.128  | -18.269 | -3.092 | 1.00 | 0.00 |
| ATOM | 611 | CD  | PRO | 38 | 0.671  | -18.287 | -2.864 | 1.00 | 0.00 |
| ATOM | 612 | HD2 | PRO | 38 | 0.234  | -17.385 | -3.290 | 1.00 | 0.00 |
| ATOM | 613 | HD3 | PRO | 38 | 0.480  | -18.312 | -1.791 | 1.00 | 0.00 |
| ATOM | 614 | CG  | PRO | 38 | 0.197  | -19.563 | -3.572 | 1.00 | 0.00 |

|      |     |         |    |        |         |        |      |      |
|------|-----|---------|----|--------|---------|--------|------|------|
| ATOM | 615 | HG2 PRO | 38 | -0.311 | -19.288 | -4.496 | 1.00 | 0.00 |
| ATOM | 616 | HG3 PRO | 38 | -0.497 | -20.094 | -2.920 | 1.00 | 0.00 |
| ATOM | 617 | CB PRO  | 38 | 1.412  | -20.389 | -3.842 | 1.00 | 0.00 |
| ATOM | 618 | HB2 PRO | 38 | 1.261  | -20.916 | -4.784 | 1.00 | 0.00 |
| ATOM | 619 | HB3 PRO | 38 | 1.651  | -21.109 | -3.059 | 1.00 | 0.00 |
| ATOM | 620 | CA PRO  | 38 | 2.548  | -19.381 | -3.987 | 1.00 | 0.00 |
| ATOM | 621 | HA PRO  | 38 | 3.508  | -19.762 | -3.638 | 1.00 | 0.00 |
| ATOM | 622 | C PRO   | 38 | 2.682  | -18.915 | -5.434 | 1.00 | 0.00 |
| ATOM | 623 | O PRO   | 38 | 1.916  | -18.066 | -5.892 | 1.00 | 0.00 |
| ATOM | 624 | N ARG   | 39 | 3.652  | -19.475 | -6.150 | 1.00 | 0.00 |
| ATOM | 625 | H ARG   | 39 | 4.248  | -20.186 | -5.750 | 1.00 | 0.00 |
| ATOM | 626 | CA ARG  | 39 | 3.861  | -19.101 | -7.546 | 1.00 | 0.00 |
| ATOM | 627 | HA ARG  | 39 | 4.080  | -18.036 | -7.613 | 1.00 | 0.00 |
| ATOM | 628 | CB ARG  | 39 | 5.031  | -19.877 | -8.139 | 1.00 | 0.00 |
| ATOM | 629 | HB2 ARG | 39 | 4.765  | -20.932 | -8.207 | 1.00 | 0.00 |
| ATOM | 630 | HB3 ARG | 39 | 5.250  | -19.493 | -9.135 | 1.00 | 0.00 |
| ATOM | 631 | CG ARG  | 39 | 6.268  | -19.720 | -7.249 | 1.00 | 0.00 |
| ATOM | 632 | HG2 ARG | 39 | 6.489  | -18.661 | -7.118 | 1.00 | 0.00 |
| ATOM | 633 | HG3 ARG | 39 | 6.076  | -20.174 | -6.276 | 1.00 | 0.00 |
| ATOM | 634 | CD ARG  | 39 | 7.464  | -20.413 | -7.907 | 1.00 | 0.00 |
| ATOM | 635 | HD2 ARG | 39 | 7.197  | -21.435 | -8.177 | 1.00 | 0.00 |
| ATOM | 636 | HD3 ARG | 39 | 7.762  | -19.867 | -8.802 | 1.00 | 0.00 |

|      |     |      |     |    |        |         |         |      |      |
|------|-----|------|-----|----|--------|---------|---------|------|------|
| ATOM | 637 | NE   | ARG | 39 | 8.596  | -20.454 | -6.986  | 1.00 | 0.00 |
| ATOM | 638 | HE   | ARG | 39 | 9.360  | -19.802 | -7.093  | 1.00 | 0.00 |
| ATOM | 639 | CZ   | ARG | 39 | 8.652  | -21.341 | -5.992  | 1.00 | 0.00 |
| ATOM | 640 | NH1  | ARG | 39 | 7.682  | -22.198 | -5.821  | 1.00 | 0.00 |
| ATOM | 641 | HH11 | ARG | 39 | 6.888  | -22.188 | -6.444  | 1.00 | 0.00 |
| ATOM | 642 | HH12 | ARG | 39 | 7.731  | -22.867 | -5.066  | 1.00 | 0.00 |
| ATOM | 643 | NH2  | ARG | 39 | 9.680  | -21.351 | -5.188  | 1.00 | 0.00 |
| ATOM | 644 | HH21 | ARG | 39 | 10.429 | -20.687 | -5.322  | 1.00 | 0.00 |
| ATOM | 645 | HH22 | ARG | 39 | 9.722  | -22.023 | -4.435  | 1.00 | 0.00 |
| ATOM | 646 | C    | ARG | 39 | 2.629  | -19.442 | -8.360  | 1.00 | 0.00 |
| ATOM | 647 | O    | ARG | 39 | 2.227  | -18.691 | -9.249  | 1.00 | 0.00 |
| ATOM | 648 | N    | ARG | 40 | 2.039  | -20.596 | -8.053  | 1.00 | 0.00 |
| ATOM | 649 | H    | ARG | 40 | 2.417  | -21.196 | -7.333  | 1.00 | 0.00 |
| ATOM | 650 | CA   | ARG | 40 | 0.862  | -21.042 | -8.770  | 1.00 | 0.00 |
| ATOM | 651 | HA   | ARG | 40 | 1.031  | -20.966 | -9.844  | 1.00 | 0.00 |
| ATOM | 652 | CB   | ARG | 40 | 0.551  | -22.500 | -8.427  | 1.00 | 0.00 |
| ATOM | 653 | HB2  | ARG | 40 | 0.533  | -22.623 | -7.344  | 1.00 | 0.00 |
| ATOM | 654 | HB3  | ARG | 40 | -0.420 | -22.772 | -8.839  | 1.00 | 0.00 |
| ATOM | 655 | CG   | ARG | 40 | 1.630  | -23.406 | -9.025  | 1.00 | 0.00 |
| ATOM | 656 | HG2  | ARG | 40 | 2.612  | -22.979 | -8.822  | 1.00 | 0.00 |
| ATOM | 657 | HG3  | ARG | 40 | 1.564  | -24.394 | -8.569  | 1.00 | 0.00 |
| ATOM | 658 | CD   | ARG | 40 | 1.429  | -23.528 | -10.540 | 1.00 | 0.00 |

|      |     |      |     |    |        |         |         |      |      |
|------|-----|------|-----|----|--------|---------|---------|------|------|
| ATOM | 659 | HD2  | ARG | 40 | 1.443  | -22.538 | -10.995 | 1.00 | 0.00 |
| ATOM | 660 | HD3  | ARG | 40 | 2.225  | -24.136 | -10.970 | 1.00 | 0.00 |
| ATOM | 661 | NE   | ARG | 40 | 0.146  | -24.161 | -10.834 | 1.00 | 0.00 |
| ATOM | 662 | HE   | ARG | 40 | -0.647 | -23.595 | -11.097 | 1.00 | 0.00 |
| ATOM | 663 | CZ   | ARG | 40 | -0.011 | -25.482 | -10.764 | 1.00 | 0.00 |
| ATOM | 664 | NH1  | ARG | 40 | 0.991  | -26.247 | -10.422 | 1.00 | 0.00 |
| ATOM | 665 | HH11 | ARG | 40 | 1.888  | -25.835 | -10.210 | 1.00 | 0.00 |
| ATOM | 666 | HH12 | ARG | 40 | 0.864  | -27.248 | -10.371 | 1.00 | 0.00 |
| ATOM | 667 | NH2  | ARG | 40 | -1.171 | -26.014 | -11.038 | 1.00 | 0.00 |
| ATOM | 668 | HH21 | ARG | 40 | -1.945 | -25.422 | -11.302 | 1.00 | 0.00 |
| ATOM | 669 | HH22 | ARG | 40 | -1.289 | -27.016 | -10.984 | 1.00 | 0.00 |
| ATOM | 670 | C    | ARG | 40 | -0.323 | -20.164 | -8.429  | 1.00 | 0.00 |
| ATOM | 671 | O    | ARG | 40 | -0.969 | -20.327 | -7.392  | 1.00 | 0.00 |
| ATOM | 672 | N    | GLY | 41 | -0.592 | -19.240 | -9.330  | 1.00 | 0.00 |
| ATOM | 673 | H    | GLY | 41 | -0.017 | -19.164 | -10.157 | 1.00 | 0.00 |
| ATOM | 674 | CA   | GLY | 41 | -1.708 | -18.309 | -9.173  | 1.00 | 0.00 |
| ATOM | 675 | HA2  | GLY | 41 | -1.645 | -17.548 | -9.950  | 1.00 | 0.00 |
| ATOM | 676 | HA3  | GLY | 41 | -2.643 | -18.858 | -9.278  | 1.00 | 0.00 |
| ATOM | 677 | C    | GLY | 41 | -1.682 | -17.628 | -7.807  | 1.00 | 0.00 |
| ATOM | 678 | O    | GLY | 41 | -2.338 | -18.080 | -6.867  | 1.00 | 0.00 |
| ATOM | 679 | N    | MET | 42 | -0.926 | -16.535 | -7.707  | 1.00 | 0.00 |
| ATOM | 680 | H    | MET | 42 | -0.393 | -16.210 | -8.501  | 1.00 | 0.00 |



|      |     |     |     |    |        |         |        |      |      |
|------|-----|-----|-----|----|--------|---------|--------|------|------|
| ATOM | 681 | CA  | MET | 42 | -0.823 | -15.791 | -6.451 | 1.00 | 0.00 |
| ATOM | 682 | HA  | MET | 42 | -0.377 | -16.419 | -5.679 | 1.00 | 0.00 |
| ATOM | 683 | CB  | MET | 42 | 0.062  | -14.556 | -6.649 | 1.00 | 0.00 |
| ATOM | 684 | HB2 | MET | 42 | -0.312 | -13.973 | -7.490 | 1.00 | 0.00 |
| ATOM | 685 | HB3 | MET | 42 | 0.040  | -13.946 | -5.746 | 1.00 | 0.00 |
| ATOM | 686 | CG  | MET | 42 | 1.501  | -14.994 | -6.933 | 1.00 | 0.00 |
| ATOM | 687 | HG2 | MET | 42 | 1.859  | -15.633 | -6.125 | 1.00 | 0.00 |
| ATOM | 688 | HG3 | MET | 42 | 1.541  | -15.543 | -7.874 | 1.00 | 0.00 |
| ATOM | 689 | SD  | MET | 42 | 2.563  | -13.534 | -7.051 | 1.00 | 0.00 |
| ATOM | 690 | CE  | MET | 42 | 4.090  | -14.397 | -7.498 | 1.00 | 0.00 |
| ATOM | 691 | HE1 | MET | 42 | 3.942  | -14.939 | -8.432 | 1.00 | 0.00 |
| ATOM | 692 | HE2 | MET | 42 | 4.895  | -13.672 | -7.623 | 1.00 | 0.00 |
| ATOM | 693 | HE3 | MET | 42 | 4.355  | -15.101 | -6.708 | 1.00 | 0.00 |
| ATOM | 694 | C   | MET | 42 | -2.206 | -15.357 | -5.966 | 1.00 | 0.00 |
| ATOM | 695 | O   | MET | 42 | -3.199 | -15.503 | -6.680 | 1.00 | 0.00 |
| ATOM | 696 | N   | GLU | 43 | -2.264 | -14.825 | -4.746 | 1.00 | 0.00 |
| ATOM | 697 | H   | GLU | 43 | -1.430 | -14.738 | -4.182 | 1.00 | 0.00 |
| ATOM | 698 | CA  | GLU | 43 | -3.534 | -14.380 | -4.178 | 1.00 | 0.00 |
| ATOM | 699 | HA  | GLU | 43 | -4.282 | -15.167 | -4.274 | 1.00 | 0.00 |
| ATOM | 700 | CB  | GLU | 43 | -3.357 | -14.052 | -2.691 | 1.00 | 0.00 |
| ATOM | 701 | HB2 | GLU | 43 | -2.760 | -14.831 | -2.216 | 1.00 | 0.00 |
| ATOM | 702 | HB3 | GLU | 43 | -2.849 | -13.093 | -2.588 | 1.00 | 0.00 |

|      |     |     |     |    |        |         |        |      |      |
|------|-----|-----|-----|----|--------|---------|--------|------|------|
| ATOM | 703 | CG  | GLU | 43 | -4.730 | -13.978 | -2.015 | 1.00 | 0.00 |
| ATOM | 704 | HG2 | GLU | 43 | -5.312 | -13.172 | -2.460 | 1.00 | 0.00 |
| ATOM | 705 | HG3 | GLU | 43 | -5.247 | -14.926 | -2.167 | 1.00 | 0.00 |
| ATOM | 706 | CD  | GLU | 43 | -4.568 | -13.722 | -0.518 | 1.00 | 0.00 |
| ATOM | 707 | OE1 | GLU | 43 | -4.045 | -12.678 | -0.168 | 1.00 | 0.00 |
| ATOM | 708 | OE2 | GLU | 43 | -4.978 | -14.571 | 0.257  | 1.00 | 0.00 |
| ATOM | 709 | C   | GLU | 43 | -4.050 | -13.146 | -4.921 | 1.00 | 0.00 |
| ATOM | 710 | O   | GLU | 43 | -3.326 | -12.163 | -5.081 | 1.00 | 0.00 |
| ATOM | 711 | N   | PRO | 44 | -5.280 | -13.187 | -5.380 | 1.00 | 0.00 |
| ATOM | 712 | CD  | PRO | 44 | -6.212 | -14.317 | -5.230 | 1.00 | 0.00 |
| ATOM | 713 | HD2 | PRO | 44 | -6.204 | -14.653 | -4.193 | 1.00 | 0.00 |
| ATOM | 714 | HD3 | PRO | 44 | -5.892 | -15.134 | -5.878 | 1.00 | 0.00 |
| ATOM | 715 | CG  | PRO | 44 | -7.560 | -13.736 | -5.648 | 1.00 | 0.00 |
| ATOM | 716 | HG2 | PRO | 44 | -8.097 | -13.404 | -4.760 | 1.00 | 0.00 |
| ATOM | 717 | HG3 | PRO | 44 | -8.140 | -14.507 | -6.156 | 1.00 | 0.00 |
| ATOM | 718 | CB  | PRO | 44 | -7.268 | -12.597 | -6.566 | 1.00 | 0.00 |
| ATOM | 719 | HB2 | PRO | 44 | -8.030 | -11.828 | -6.439 | 1.00 | 0.00 |
| ATOM | 720 | HB3 | PRO | 44 | -7.230 | -12.903 | -7.611 | 1.00 | 0.00 |
| ATOM | 721 | CA  | PRO | 44 | -5.902 | -12.053 | -6.131 | 1.00 | 0.00 |
| ATOM | 722 | HA  | PRO | 44 | -5.265 | -11.828 | -6.986 | 1.00 | 0.00 |
| ATOM | 723 | C   | PRO | 44 | -6.064 | -10.800 | -5.273 | 1.00 | 0.00 |
| ATOM | 724 | O   | PRO | 44 | -6.116 | -9.686  | -5.798 | 1.00 | 0.00 |

|      |     |     |     |    |         |         |        |      |      |
|------|-----|-----|-----|----|---------|---------|--------|------|------|
| ATOM | 725 | N   | HIE | 45 | -6.148  | -10.987 | -3.958 | 1.00 | 0.00 |
| ATOM | 726 | H   | HIE | 45 | -6.120  | -11.918 | -3.568 | 1.00 | 0.00 |
| ATOM | 727 | CA  | HIE | 45 | -6.310  | -9.858  | -3.045 | 1.00 | 0.00 |
| ATOM | 728 | HA  | HIE | 45 | -7.283  | -9.393  | -3.198 | 1.00 | 0.00 |
| ATOM | 729 | CB  | HIE | 45 | -6.219  | -10.336 | -1.593 | 1.00 | 0.00 |
| ATOM | 730 | HB2 | HIE | 45 | -5.301  | -10.890 | -1.396 | 1.00 | 0.00 |
| ATOM | 731 | HB3 | HIE | 45 | -6.304  | -9.512  | -0.885 | 1.00 | 0.00 |
| ATOM | 732 | CG  | HIE | 45 | -7.359  | -11.274 | -1.301 | 1.00 | 0.00 |
| ATOM | 733 | ND1 | HIE | 45 | -7.153  | -12.584 | -0.899 | 1.00 | 0.00 |
| ATOM | 734 | CE1 | HIE | 45 | -8.361  | -13.150 | -0.726 | 1.00 | 0.00 |
| ATOM | 735 | HE1 | HIE | 45 | -8.383  | -14.192 | -0.407 | 1.00 | 0.00 |
| ATOM | 736 | NE2 | HIE | 45 | -9.351  | -12.293 | -0.988 | 1.00 | 0.00 |
| ATOM | 737 | HE2 | HIE | 45 | -10.351 | -12.429 | -0.946 | 1.00 | 0.00 |
| ATOM | 738 | CD2 | HIE | 45 | -8.721  | -11.108 | -1.351 | 1.00 | 0.00 |
| ATOM | 739 | HD2 | HIE | 45 | -9.315  | -10.235 | -1.618 | 1.00 | 0.00 |
| ATOM | 740 | C   | HIE | 45 | -5.238  | -8.802  | -3.304 | 1.00 | 0.00 |
| ATOM | 741 | O   | HIE | 45 | -5.536  | -7.608  | -3.375 | 1.00 | 0.00 |
| ATOM | 742 | N   | MET | 46 | -3.994  | -9.251  | -3.455 | 1.00 | 0.00 |
| ATOM | 743 | H   | MET | 46 | -3.791  | -10.238 | -3.387 | 1.00 | 0.00 |
| ATOM | 744 | CA  | MET | 46 | -2.889  | -8.334  | -3.717 | 1.00 | 0.00 |
| ATOM | 745 | HA  | MET | 46 | -2.860  | -7.557  | -2.953 | 1.00 | 0.00 |
| ATOM | 746 | CB  | MET | 46 | -1.558  | -9.094  | -3.692 | 1.00 | 0.00 |

|      |     |         |    |        |         |        |      |      |
|------|-----|---------|----|--------|---------|--------|------|------|
| ATOM | 747 | HB2 MET | 46 | -1.531 | -9.794  | -4.527 | 1.00 | 0.00 |
| ATOM | 748 | HB3 MET | 46 | -0.738 | -8.382  | -3.788 | 1.00 | 0.00 |
| ATOM | 749 | CG MET  | 46 | -1.412 | -9.864  | -2.377 | 1.00 | 0.00 |
| ATOM | 750 | HG2 MET | 46 | -2.130 | -10.684 | -2.352 | 1.00 | 0.00 |
| ATOM | 751 | HG3 MET | 46 | -0.401 | -10.265 | -2.299 | 1.00 | 0.00 |
| ATOM | 752 | SD MET  | 46 | -1.722 | -8.759  | -0.978 | 1.00 | 0.00 |
| ATOM | 753 | CE MET  | 46 | -2.328 | -10.023 | 0.168  | 1.00 | 0.00 |
| ATOM | 754 | HE1 MET | 46 | -1.551 | -10.772 | 0.328  | 1.00 | 0.00 |
| ATOM | 755 | HE2 MET | 46 | -2.585 | -9.558  | 1.120  | 1.00 | 0.00 |
| ATOM | 756 | HE3 MET | 46 | -3.212 | -10.502 | -0.253 | 1.00 | 0.00 |
| ATOM | 757 | C MET   | 46 | -3.065 | -7.681  | -5.087 | 1.00 | 0.00 |
| ATOM | 758 | O MET   | 46 | -2.850 | -6.480  | -5.251 | 1.00 | 0.00 |
| ATOM | 759 | N SER   | 47 | -3.458 | -8.497  | -6.063 | 1.00 | 0.00 |
| ATOM | 760 | H SER   | 47 | -3.597 | -9.479  | -5.868 | 1.00 | 0.00 |
| ATOM | 761 | CA SER  | 47 | -3.666 | -8.026  | -7.430 | 1.00 | 0.00 |
| ATOM | 762 | HA SER  | 47 | -2.738 | -7.618  | -7.831 | 1.00 | 0.00 |
| ATOM | 763 | CB SER  | 47 | -4.112 | -9.190  | -8.317 | 1.00 | 0.00 |
| ATOM | 764 | HB2 SER | 47 | -5.104 | -9.522  | -8.012 | 1.00 | 0.00 |
| ATOM | 765 | HB3 SER | 47 | -4.141 | -8.866  | -9.357 | 1.00 | 0.00 |
| ATOM | 766 | OG SER  | 47 | -3.191 | -10.264 | -8.182 | 1.00 | 0.00 |
| ATOM | 767 | HG SER  | 47 | -3.469 | -10.996 | -8.738 | 1.00 | 0.00 |
| ATOM | 768 | C SER   | 47 | -4.710 | -6.913  | -7.489 | 1.00 | 0.00 |

|      |     |     |     |    |         |        |        |      |      |
|------|-----|-----|-----|----|---------|--------|--------|------|------|
| ATOM | 769 | O   | SER | 47 | -4.627  | -6.020 | -8.332 | 1.00 | 0.00 |
| ATOM | 770 | N   | GLU | 48 | -5.701  | -6.982 | -6.604 | 1.00 | 0.00 |
| ATOM | 771 | H   | GLU | 48 | -5.749  | -7.744 | -5.942 | 1.00 | 0.00 |
| ATOM | 772 | CA  | GLU | 48 | -6.763  | -5.979 | -6.585 | 1.00 | 0.00 |
| ATOM | 773 | HA  | GLU | 48 | -7.327  | -6.014 | -7.516 | 1.00 | 0.00 |
| ATOM | 774 | CB  | GLU | 48 | -7.723  | -6.255 | -5.419 | 1.00 | 0.00 |
| ATOM | 775 | HB2 | GLU | 48 | -7.547  | -7.262 | -5.039 | 1.00 | 0.00 |
| ATOM | 776 | HB3 | GLU | 48 | -7.542  | -5.531 | -4.625 | 1.00 | 0.00 |
| ATOM | 777 | CG  | GLU | 48 | -9.176  | -6.136 | -5.898 | 1.00 | 0.00 |
| ATOM | 778 | HG2 | GLU | 48 | -9.224  | -6.392 | -6.956 | 1.00 | 0.00 |
| ATOM | 779 | HG3 | GLU | 48 | -9.790  | -6.833 | -5.328 | 1.00 | 0.00 |
| ATOM | 780 | CD  | GLU | 48 | -9.697  | -4.714 | -5.694 | 1.00 | 0.00 |
| ATOM | 781 | OE1 | GLU | 48 | -8.949  | -3.782 | -5.940 | 1.00 | 0.00 |
| ATOM | 782 | OE2 | GLU | 48 | -10.843 | -4.577 | -5.297 | 1.00 | 0.00 |
| ATOM | 783 | C   | GLU | 48 | -6.175  | -4.575 | -6.451 | 1.00 | 0.00 |
| ATOM | 784 | O   | GLU | 48 | -6.464  | -3.694 | -7.262 | 1.00 | 0.00 |
| ATOM | 785 | N   | CYX | 49 | -5.342  | -4.377 | -5.433 | 1.00 | 0.00 |
| ATOM | 786 | H   | CYX | 49 | -5.152  | -5.117 | -4.772 | 1.00 | 0.00 |
| ATOM | 787 | CA  | CYX | 49 | -4.713  | -3.077 | -5.216 | 1.00 | 0.00 |
| ATOM | 788 | HA  | CYX | 49 | -5.467  | -2.291 | -5.236 | 1.00 | 0.00 |
| ATOM | 789 | CB  | CYX | 49 | -4.010  | -3.049 | -3.848 | 1.00 | 0.00 |
| ATOM | 790 | HB2 | CYX | 49 | -3.804  | -4.069 | -3.523 | 1.00 | 0.00 |

|      |     |     |     |    |        |        |         |      |      |
|------|-----|-----|-----|----|--------|--------|---------|------|------|
| ATOM | 791 | HB3 | CYX | 49 | -3.072 | -2.500 | -3.932  | 1.00 | 0.00 |
| ATOM | 792 | SG  | CYX | 49 | -5.078 | -2.222 | -2.641  | 1.00 | 0.00 |
| ATOM | 793 | C   | CYX | 49 | -3.707 | -2.769 | -6.327  | 1.00 | 0.00 |
| ATOM | 794 | O   | CYX | 49 | -3.506 | -1.609 | -6.680  | 1.00 | 0.00 |
| ATOM | 795 | N   | CYX | 50 | -3.078 | -3.817 | -6.865  | 1.00 | 0.00 |
| ATOM | 796 | H   | CYX | 50 | -3.274 | -4.749 | -6.526  | 1.00 | 0.00 |
| ATOM | 797 | CA  | CYX | 50 | -2.079 | -3.659 | -7.928  | 1.00 | 0.00 |
| ATOM | 798 | HA  | CYX | 50 | -1.191 | -3.163 | -7.535  | 1.00 | 0.00 |
| ATOM | 799 | CB  | CYX | 50 | -1.672 | -5.027 | -8.474  | 1.00 | 0.00 |
| ATOM | 800 | HB2 | CYX | 50 | -1.400 | -5.683 | -7.647  | 1.00 | 0.00 |
| ATOM | 801 | HB3 | CYX | 50 | -2.506 | -5.463 | -9.023  | 1.00 | 0.00 |
| ATOM | 802 | SG  | CYX | 50 | -0.280 | -4.832 | -9.619  | 1.00 | 0.00 |
| ATOM | 803 | C   | CYX | 50 | -2.592 | -2.806 | -9.085  | 1.00 | 0.00 |
| ATOM | 804 | O   | CYX | 50 | -1.870 | -1.953 | -9.602  | 1.00 | 0.00 |
| ATOM | 805 | N   | GLU | 51 | -3.828 | -3.055 | -9.505  | 1.00 | 0.00 |
| ATOM | 806 | H   | GLU | 51 | -4.381 | -3.784 | -9.077  | 1.00 | 0.00 |
| ATOM | 807 | CA  | GLU | 51 | -4.405 | -2.314 | -10.622 | 1.00 | 0.00 |
| ATOM | 808 | HA  | GLU | 51 | -3.806 | -2.465 | -11.520 | 1.00 | 0.00 |
| ATOM | 809 | CB  | GLU | 51 | -5.831 | -2.806 | -10.895 | 1.00 | 0.00 |
| ATOM | 810 | HB2 | GLU | 51 | -5.824 | -3.890 | -11.013 | 1.00 | 0.00 |
| ATOM | 811 | HB3 | GLU | 51 | -6.473 | -2.537 | -10.056 | 1.00 | 0.00 |
| ATOM | 812 | CG  | GLU | 51 | -6.365 | -2.155 | -12.178 | 1.00 | 0.00 |

|      |     |      |     |    |        |        |         |      |      |
|------|-----|------|-----|----|--------|--------|---------|------|------|
| ATOM | 813 | HG2  | GLU | 51 | -7.412 | -2.429 | -12.308 | 1.00 | 0.00 |
| ATOM | 814 | HG3  | GLU | 51 | -6.282 | -1.073 | -12.082 | 1.00 | 0.00 |
| ATOM | 815 | CD   | GLU | 51 | -5.560 | -2.623 | -13.394 | 1.00 | 0.00 |
| ATOM | 816 | OE1  | GLU | 51 | -5.069 | -3.741 | -13.372 | 1.00 | 0.00 |
| ATOM | 817 | OE2  | GLU | 51 | -5.450 | -1.854 | -14.334 | 1.00 | 0.00 |
| ATOM | 818 | C    | GLU | 51 | -4.422 | -0.810 | -10.349 | 1.00 | 0.00 |
| ATOM | 819 | O    | GLU | 51 | -4.204 | -0.009 | -11.256 | 1.00 | 0.00 |
| ATOM | 820 | N    | GLN | 52 | -4.693 | -0.433 | -9.102  | 1.00 | 0.00 |
| ATOM | 821 | H    | GLN | 52 | -4.898 | -1.121 | -8.391  | 1.00 | 0.00 |
| ATOM | 822 | CA   | GLN | 52 | -4.748 | 0.981  | -8.734  | 1.00 | 0.00 |
| ATOM | 823 | HA   | GLN | 52 | -5.505 | 1.496  | -9.324  | 1.00 | 0.00 |
| ATOM | 824 | CB   | GLN | 52 | -5.111 | 1.108  | -7.257  | 1.00 | 0.00 |
| ATOM | 825 | HB2  | GLN | 52 | -4.353 | 0.613  | -6.649  | 1.00 | 0.00 |
| ATOM | 826 | HB3  | GLN | 52 | -5.166 | 2.161  | -6.982  | 1.00 | 0.00 |
| ATOM | 827 | CG   | GLN | 52 | -6.471 | 0.446  | -7.015  | 1.00 | 0.00 |
| ATOM | 828 | HG2  | GLN | 52 | -6.602 | -0.394 | -7.697  | 1.00 | 0.00 |
| ATOM | 829 | HG3  | GLN | 52 | -6.532 | 0.091  | -5.986  | 1.00 | 0.00 |
| ATOM | 830 | CD   | GLN | 52 | -7.597 | 1.448  | -7.253  | 1.00 | 0.00 |
| ATOM | 831 | OE1  | GLN | 52 | -7.700 | 2.024  | -8.335  | 1.00 | 0.00 |
| ATOM | 832 | NE2  | GLN | 52 | -8.454 | 1.690  | -6.298  | 1.00 | 0.00 |
| ATOM | 833 | HE21 | GLN | 52 | -9.201 | 2.352  | -6.450  | 1.00 | 0.00 |
| ATOM | 834 | HE22 | GLN | 52 | -8.365 | 1.213  | -5.411  | 1.00 | 0.00 |

|      |     |      |     |    |        |        |         |      |      |
|------|-----|------|-----|----|--------|--------|---------|------|------|
| ATOM | 835 | C    | GLN | 52 | -3.419 | 1.684  | -9.012  | 1.00 | 0.00 |
| ATOM | 836 | O    | GLN | 52 | -3.385 | 2.697  | -9.710  | 1.00 | 0.00 |
| ATOM | 837 | N    | LEU | 53 | -2.323 | 1.134  | -8.481  | 1.00 | 0.00 |
| ATOM | 838 | H    | LEU | 53 | -2.380 | 0.278  | -7.947  | 1.00 | 0.00 |
| ATOM | 839 | CA   | LEU | 53 | -1.000 | 1.724  | -8.710  | 1.00 | 0.00 |
| ATOM | 840 | HA   | LEU | 53 | -0.971 | 2.729  | -8.289  | 1.00 | 0.00 |
| ATOM | 841 | CB   | LEU | 53 | 0.100  | 0.884  | -8.047  | 1.00 | 0.00 |
| ATOM | 842 | HB2  | LEU | 53 | 0.266  | 0.005  | -8.670  | 1.00 | 0.00 |
| ATOM | 843 | HB3  | LEU | 53 | 1.015  | 1.475  | -8.004  | 1.00 | 0.00 |
| ATOM | 844 | CG   | LEU | 53 | -0.289 | 0.440  | -6.630  | 1.00 | 0.00 |
| ATOM | 845 | HG   | LEU | 53 | 0.608  | 0.445  | -6.009  | 1.00 | 0.00 |
| ATOM | 846 | CD1  | LEU | 53 | -1.344 | 1.372  | -6.013  | 1.00 | 0.00 |
| ATOM | 847 | HD11 | LEU | 53 | -2.241 | 1.367  | -6.632  | 1.00 | 0.00 |
| ATOM | 848 | HD12 | LEU | 53 | -1.593 | 1.025  | -5.010  | 1.00 | 0.00 |
| ATOM | 849 | HD13 | LEU | 53 | -0.946 | 2.385  | -5.958  | 1.00 | 0.00 |
| ATOM | 850 | CD2  | LEU | 53 | -0.844 | -0.981 | -6.717  | 1.00 | 0.00 |
| ATOM | 851 | HD21 | LEU | 53 | -0.081 | -1.646 | -7.123  | 1.00 | 0.00 |
| ATOM | 852 | HD22 | LEU | 53 | -1.129 | -1.322 | -5.721  | 1.00 | 0.00 |
| ATOM | 853 | HD23 | LEU | 53 | -1.718 | -0.991 | -7.368  | 1.00 | 0.00 |
| ATOM | 854 | C    | LEU | 53 | -0.730 | 1.716  | -10.196 | 1.00 | 0.00 |
| ATOM | 855 | O    | LEU | 53 | -0.355 | 2.719  | -10.803 | 1.00 | 0.00 |
| ATOM | 856 | N    | GLU | 54 | -0.949 | 0.541  | -10.750 | 1.00 | 0.00 |



|      |     |     |     |    |        |        |         |      |      |
|------|-----|-----|-----|----|--------|--------|---------|------|------|
| ATOM | 857 | H   | GLU | 54 | -1.214 | -0.230 | -10.153 | 1.00 | 0.00 |
| ATOM | 858 | CA  | GLU | 54 | -0.775 | 0.286  | -12.158 | 1.00 | 0.00 |
| ATOM | 859 | HA  | GLU | 54 | 0.268  | 0.390  | -12.458 | 1.00 | 0.00 |
| ATOM | 860 | CB  | GLU | 54 | -1.211 | -1.155 | -12.403 | 1.00 | 0.00 |
| ATOM | 861 | HB2 | GLU | 54 | -0.503 | -1.825 | -11.914 | 1.00 | 0.00 |
| ATOM | 862 | HB3 | GLU | 54 | -2.203 | -1.301 | -11.975 | 1.00 | 0.00 |
| ATOM | 863 | CG  | GLU | 54 | -1.252 | -1.462 | -13.906 | 1.00 | 0.00 |
| ATOM | 864 | HG2 | GLU | 54 | -1.885 | -0.725 | -14.400 | 1.00 | 0.00 |
| ATOM | 865 | HG3 | GLU | 54 | -0.241 | -1.400 | -14.309 | 1.00 | 0.00 |
| ATOM | 866 | CD  | GLU | 54 | -1.814 | -2.865 | -14.153 | 1.00 | 0.00 |
| ATOM | 867 | OE1 | GLU | 54 | -2.131 | -3.545 | -13.189 | 1.00 | 0.00 |
| ATOM | 868 | OE2 | GLU | 54 | -1.918 | -3.240 | -15.310 | 1.00 | 0.00 |
| ATOM | 869 | C   | GLU | 54 | -1.574 | 1.285  | -12.996 | 1.00 | 0.00 |
| ATOM | 870 | O   | GLU | 54 | -1.154 | 1.667  | -14.089 | 1.00 | 0.00 |
| ATOM | 871 | N   | GLY | 55 | -2.713 | 1.720  | -12.462 | 1.00 | 0.00 |
| ATOM | 872 | H   | GLY | 55 | -3.015 | 1.378  | -11.561 | 1.00 | 0.00 |
| ATOM | 873 | CA  | GLY | 55 | -3.556 | 2.695  | -13.152 | 1.00 | 0.00 |
| ATOM | 874 | HA2 | GLY | 55 | -3.463 | 2.557  | -14.229 | 1.00 | 0.00 |
| ATOM | 875 | HA3 | GLY | 55 | -4.595 | 2.551  | -12.855 | 1.00 | 0.00 |
| ATOM | 876 | C   | GLY | 55 | -3.129 | 4.118  | -12.794 | 1.00 | 0.00 |
| ATOM | 877 | O   | GLY | 55 | -3.526 | 5.082  | -13.449 | 1.00 | 0.00 |
| ATOM | 878 | N   | MET | 56 | -2.313 | 4.232  | -11.748 | 1.00 | 0.00 |

|      |     |     |     |    |        |       |         |      |      |
|------|-----|-----|-----|----|--------|-------|---------|------|------|
| ATOM | 879 | H   | MET | 56 | -2.032 | 3.405 | -11.240 | 1.00 | 0.00 |
| ATOM | 880 | CA  | MET | 56 | -1.818 | 5.529 | -11.290 | 1.00 | 0.00 |
| ATOM | 881 | HA  | MET | 56 | -2.572 | 6.299 | -11.450 | 1.00 | 0.00 |
| ATOM | 882 | CB  | MET | 56 | -1.501 | 5.457 | -9.789  | 1.00 | 0.00 |
| ATOM | 883 | HB2 | MET | 56 | -2.417 | 5.239 | -9.239  | 1.00 | 0.00 |
| ATOM | 884 | HB3 | MET | 56 | -0.775 | 4.663 | -9.614  | 1.00 | 0.00 |
| ATOM | 885 | CG  | MET | 56 | -0.923 | 6.791 | -9.309  | 1.00 | 0.00 |
| ATOM | 886 | HG2 | MET | 56 | -0.542 | 6.682 | -8.293  | 1.00 | 0.00 |
| ATOM | 887 | HG3 | MET | 56 | -0.112 | 7.099 | -9.969  | 1.00 | 0.00 |
| ATOM | 888 | SD  | MET | 56 | -2.217 | 8.054 | -9.326  | 1.00 | 0.00 |
| ATOM | 889 | CE  | MET | 56 | -2.205 | 8.417 | -7.555  | 1.00 | 0.00 |
| ATOM | 890 | HE1 | MET | 56 | -1.216 | 8.770 | -7.262  | 1.00 | 0.00 |
| ATOM | 891 | HE2 | MET | 56 | -2.944 | 9.187 | -7.336  | 1.00 | 0.00 |
| ATOM | 892 | HE3 | MET | 56 | -2.447 | 7.512 | -6.996  | 1.00 | 0.00 |
| ATOM | 893 | C   | MET | 56 | -0.563 | 5.924 | -12.061 | 1.00 | 0.00 |
| ATOM | 894 | O   | MET | 56 | 0.280  | 5.076 | -12.363 | 1.00 | 0.00 |
| ATOM | 895 | N   | ASP | 57 | -0.439 | 7.216 | -12.374 | 1.00 | 0.00 |
| ATOM | 896 | H   | ASP | 57 | -1.162 | 7.877 | -12.127 | 1.00 | 0.00 |
| ATOM | 897 | CA  | ASP | 57 | 0.728  | 7.706 | -13.104 | 1.00 | 0.00 |
| ATOM | 898 | HA  | ASP | 57 | 0.735  | 7.295 | -14.114 | 1.00 | 0.00 |
| ATOM | 899 | CB  | ASP | 57 | 0.688  | 9.236 | -13.197 | 1.00 | 0.00 |
| ATOM | 900 | HB2 | ASP | 57 | 0.616  | 9.648 | -12.190 | 1.00 | 0.00 |

|      |     |     |     |    |        |        |         |      |      |
|------|-----|-----|-----|----|--------|--------|---------|------|------|
| ATOM | 901 | HB3 | ASP | 57 | 1.607  | 9.586  | -13.667 | 1.00 | 0.00 |
| ATOM | 902 | CG  | ASP | 57 | -0.515 | 9.695  | -14.024 | 1.00 | 0.00 |
| ATOM | 903 | OD1 | ASP | 57 | -1.080 | 8.878  | -14.735 | 1.00 | 0.00 |
| ATOM | 904 | OD2 | ASP | 57 | -0.854 | 10.864 | -13.934 | 1.00 | 0.00 |
| ATOM | 905 | C   | ASP | 57 | 2.011  | 7.264  | -12.404 | 1.00 | 0.00 |
| ATOM | 906 | O   | ASP | 57 | 2.058  | 7.180  | -11.177 | 1.00 | 0.00 |
| ATOM | 907 | N   | GLU | 58 | 3.043  | 6.970  | -13.190 | 1.00 | 0.00 |
| ATOM | 908 | H   | GLU | 58 | 2.958  | 7.034  | -14.194 | 1.00 | 0.00 |
| ATOM | 909 | CA  | GLU | 58 | 4.314  | 6.519  | -12.631 | 1.00 | 0.00 |
| ATOM | 910 | HA  | GLU | 58 | 4.189  | 5.552  | -12.144 | 1.00 | 0.00 |
| ATOM | 911 | CB  | GLU | 58 | 5.347  | 6.373  | -13.750 | 1.00 | 0.00 |
| ATOM | 912 | HB2 | GLU | 58 | 5.073  | 5.539  | -14.396 | 1.00 | 0.00 |
| ATOM | 913 | HB3 | GLU | 58 | 5.384  | 7.290  | -14.337 | 1.00 | 0.00 |
| ATOM | 914 | CG  | GLU | 58 | 6.719  | 6.108  | -13.133 | 1.00 | 0.00 |
| ATOM | 915 | HG2 | GLU | 58 | 6.985  | 6.943  | -12.485 | 1.00 | 0.00 |
| ATOM | 916 | HG3 | GLU | 58 | 6.678  | 5.191  | -12.544 | 1.00 | 0.00 |
| ATOM | 917 | CD  | GLU | 58 | 7.770  | 5.961  | -14.230 | 1.00 | 0.00 |
| ATOM | 918 | OE1 | GLU | 58 | 7.775  | 4.931  | -14.886 | 1.00 | 0.00 |
| ATOM | 919 | OE2 | GLU | 58 | 8.557  | 6.879  | -14.397 | 1.00 | 0.00 |
| ATOM | 920 | C   | GLU | 58 | 4.849  | 7.486  | -11.578 | 1.00 | 0.00 |
| ATOM | 921 | O   | GLU | 58 | 5.091  | 7.096  | -10.436 | 1.00 | 0.00 |
| ATOM | 922 | N   | SER | 59 | 5.036  | 8.743  | -11.966 | 1.00 | 0.00 |

|      |     |     |     |    |       |        |         |      |      |
|------|-----|-----|-----|----|-------|--------|---------|------|------|
| ATOM | 923 | H   | SER | 59 | 4.843 | 9.021  | -12.917 | 1.00 | 0.00 |
| ATOM | 924 | CA  | SER | 59 | 5.545 | 9.750  | -11.040 | 1.00 | 0.00 |
| ATOM | 925 | HA  | SER | 59 | 6.550 | 9.483  | -10.710 | 1.00 | 0.00 |
| ATOM | 926 | CB  | SER | 59 | 5.604 | 11.111 | -11.736 | 1.00 | 0.00 |
| ATOM | 927 | HB2 | SER | 59 | 4.598 | 11.423 | -12.015 | 1.00 | 0.00 |
| ATOM | 928 | HB3 | SER | 59 | 6.039 | 11.848 | -11.061 | 1.00 | 0.00 |
| ATOM | 929 | OG  | SER | 59 | 6.408 | 11.006 | -12.904 | 1.00 | 0.00 |
| ATOM | 930 | HG  | SER | 59 | 6.447 | 11.858 | -13.343 | 1.00 | 0.00 |
| ATOM | 931 | C   | SER | 59 | 4.648 | 9.839  | -9.812  | 1.00 | 0.00 |
| ATOM | 932 | O   | SER | 59 | 5.114 | 10.076 | -8.697  | 1.00 | 0.00 |
| ATOM | 933 | N   | CYX | 60 | 3.357 | 9.642  | -10.040 | 1.00 | 0.00 |
| ATOM | 934 | H   | CYX | 60 | 3.035 | 9.474  | -10.982 | 1.00 | 0.00 |
| ATOM | 935 | CA  | CYX | 60 | 2.366 | 9.694  | -8.967  | 1.00 | 0.00 |
| ATOM | 936 | HA  | CYX | 60 | 2.562 | 10.547 | -8.318  | 1.00 | 0.00 |
| ATOM | 937 | CB  | CYX | 60 | 0.963 | 9.841  | -9.559  | 1.00 | 0.00 |
| ATOM | 938 | HB2 | CYX | 60 | 0.740 | 8.976  | -10.183 | 1.00 | 0.00 |
| ATOM | 939 | HB3 | CYX | 60 | 0.233 | 9.904  | -8.752  | 1.00 | 0.00 |
| ATOM | 940 | SG  | CYX | 60 | 0.884 | 11.353 | -10.550 | 1.00 | 0.00 |
| ATOM | 941 | C   | CYX | 60 | 2.429 | 8.441  | -8.101  | 1.00 | 0.00 |
| ATOM | 942 | O   | CYX | 60 | 2.023 | 8.456  | -6.938  | 1.00 | 0.00 |
| ATOM | 943 | N   | ARG | 61 | 2.916 | 7.352  | -8.688  | 1.00 | 0.00 |
| ATOM | 944 | H   | ARG | 61 | 3.222 | 7.389  | -9.650  | 1.00 | 0.00 |

|      |     |      |     |    |       |       |         |      |      |
|------|-----|------|-----|----|-------|-------|---------|------|------|
| ATOM | 945 | CA   | ARG | 61 | 3.005 | 6.079 | -7.983  | 1.00 | 0.00 |
| ATOM | 946 | HA   | ARG | 61 | 2.020 | 5.766 | -7.637  | 1.00 | 0.00 |
| ATOM | 947 | CB   | ARG | 61 | 3.551 | 5.011 | -8.935  | 1.00 | 0.00 |
| ATOM | 948 | HB2  | ARG | 61 | 2.999 | 5.053 | -9.873  | 1.00 | 0.00 |
| ATOM | 949 | HB3  | ARG | 61 | 4.606 | 5.208 | -9.125  | 1.00 | 0.00 |
| ATOM | 950 | CG   | ARG | 61 | 3.396 | 3.619 | -8.314  | 1.00 | 0.00 |
| ATOM | 951 | HG2  | ARG | 61 | 3.867 | 3.601 | -7.331  | 1.00 | 0.00 |
| ATOM | 952 | HG3  | ARG | 61 | 2.338 | 3.378 | -8.214  | 1.00 | 0.00 |
| ATOM | 953 | CD   | ARG | 61 | 4.070 | 2.587 | -9.220  | 1.00 | 0.00 |
| ATOM | 954 | HD2  | ARG | 61 | 5.150 | 2.738 | -9.219  | 1.00 | 0.00 |
| ATOM | 955 | HD3  | ARG | 61 | 3.845 | 1.579 | -8.870  | 1.00 | 0.00 |
| ATOM | 956 | NE   | ARG | 61 | 3.579 | 2.728 | -10.589 | 1.00 | 0.00 |
| ATOM | 957 | HE   | ARG | 61 | 3.976 | 3.436 | -11.190 | 1.00 | 0.00 |
| ATOM | 958 | CZ   | ARG | 61 | 2.612 | 1.952 | -11.074 | 1.00 | 0.00 |
| ATOM | 959 | NH1  | ARG | 61 | 2.097 | 0.999 | -10.343 | 1.00 | 0.00 |
| ATOM | 960 | HH11 | ARG | 61 | 2.435 | 0.849 | -9.403  | 1.00 | 0.00 |
| ATOM | 961 | HH12 | ARG | 61 | 1.364 | 0.416 | -10.721 | 1.00 | 0.00 |
| ATOM | 962 | NH2  | ARG | 61 | 2.182 | 2.142 | -12.290 | 1.00 | 0.00 |
| ATOM | 963 | HH21 | ARG | 61 | 2.585 | 2.875 | -12.856 | 1.00 | 0.00 |
| ATOM | 964 | HH22 | ARG | 61 | 1.449 | 1.555 | -12.660 | 1.00 | 0.00 |
| ATOM | 965 | C    | ARG | 61 | 3.916 | 6.189 | -6.763  | 1.00 | 0.00 |
| ATOM | 966 | O    | ARG | 61 | 3.623 | 5.617 | -5.712  | 1.00 | 0.00 |

|      |     |     |     |    |       |        |        |      |      |
|------|-----|-----|-----|----|-------|--------|--------|------|------|
| ATOM | 967 | N   | CYX | 62 | 5.016 | 6.927  | -6.903 | 1.00 | 0.00 |
| ATOM | 968 | H   | CYX | 62 | 5.232 | 7.373  | -7.783 | 1.00 | 0.00 |
| ATOM | 969 | CA  | CYX | 62 | 5.950 | 7.097  | -5.794 | 1.00 | 0.00 |
| ATOM | 970 | HA  | CYX | 62 | 6.371 | 6.132  | -5.509 | 1.00 | 0.00 |
| ATOM | 971 | CB  | CYX | 62 | 7.096 | 8.028  | -6.210 | 1.00 | 0.00 |
| ATOM | 972 | HB2 | CYX | 62 | 6.770 | 9.065  | -6.129 | 1.00 | 0.00 |
| ATOM | 973 | HB3 | CYX | 62 | 7.953 | 7.865  | -5.556 | 1.00 | 0.00 |
| ATOM | 974 | SG  | CYX | 62 | 7.559 | 7.702  | -7.930 | 1.00 | 0.00 |
| ATOM | 975 | C   | CYX | 62 | 5.225 | 7.687  | -4.586 | 1.00 | 0.00 |
| ATOM | 976 | O   | CYX | 62 | 5.183 | 7.084  | -3.513 | 1.00 | 0.00 |
| ATOM | 977 | N   | GLU | 63 | 4.645 | 8.869  | -4.784 | 1.00 | 0.00 |
| ATOM | 978 | H   | GLU | 63 | 4.720 | 9.320  | -5.684 | 1.00 | 0.00 |
| ATOM | 979 | CA  | GLU | 63 | 3.904 | 9.551  | -3.728 | 1.00 | 0.00 |
| ATOM | 980 | HA  | GLU | 63 | 4.559 | 9.760  | -2.881 | 1.00 | 0.00 |
| ATOM | 981 | CB  | GLU | 63 | 3.356 | 10.877 | -4.263 | 1.00 | 0.00 |
| ATOM | 982 | HB2 | GLU | 63 | 4.164 | 11.434 | -4.738 | 1.00 | 0.00 |
| ATOM | 983 | HB3 | GLU | 63 | 2.575 | 10.674 | -4.995 | 1.00 | 0.00 |
| ATOM | 984 | CG  | GLU | 63 | 2.772 | 11.706 | -3.109 | 1.00 | 0.00 |
| ATOM | 985 | HG2 | GLU | 63 | 2.051 | 11.096 | -2.564 | 1.00 | 0.00 |
| ATOM | 986 | HG3 | GLU | 63 | 3.582 | 11.996 | -2.439 | 1.00 | 0.00 |
| ATOM | 987 | CD  | GLU | 63 | 2.078 | 12.961 | -3.643 | 1.00 | 0.00 |
| ATOM | 988 | OE1 | GLU | 63 | 1.982 | 13.104 | -4.853 | 1.00 | 0.00 |

|      |      |      |     |    |       |        |        |      |      |
|------|------|------|-----|----|-------|--------|--------|------|------|
| ATOM | 989  | OE2  | GLU | 63 | 1.649 | 13.764 | -2.830 | 1.00 | 0.00 |
| ATOM | 990  | C    | GLU | 63 | 2.742 | 8.692  | -3.234 | 1.00 | 0.00 |
| ATOM | 991  | O    | GLU | 63 | 2.412 | 8.695  | -2.048 | 1.00 | 0.00 |
| ATOM | 992  | N    | GLY | 64 | 2.109 | 7.981  | -4.168 | 1.00 | 0.00 |
| ATOM | 993  | H    | GLY | 64 | 2.423 | 8.015  | -5.127 | 1.00 | 0.00 |
| ATOM | 994  | CA   | GLY | 64 | 0.958 | 7.141  | -3.845 | 1.00 | 0.00 |
| ATOM | 995  | HA2  | GLY | 64 | 0.126 | 7.786  | -3.565 | 1.00 | 0.00 |
| ATOM | 996  | HA3  | GLY | 64 | 0.690 | 6.565  | -4.730 | 1.00 | 0.00 |
| ATOM | 997  | C    | GLY | 64 | 1.248 | 6.180  | -2.698 | 1.00 | 0.00 |
| ATOM | 998  | O    | GLY | 64 | 0.561 | 6.204  | -1.677 | 1.00 | 0.00 |
| ATOM | 999  | N    | LEU | 65 | 2.255 | 5.330  | -2.872 | 1.00 | 0.00 |
| ATOM | 1000 | H    | LEU | 65 | 2.777 | 5.318  | -3.736 | 1.00 | 0.00 |
| ATOM | 1001 | CA   | LEU | 65 | 2.605 | 4.360  | -1.839 | 1.00 | 0.00 |
| ATOM | 1002 | HA   | LEU | 65 | 1.769 | 3.682  | -1.666 | 1.00 | 0.00 |
| ATOM | 1003 | CB   | LEU | 65 | 3.820 | 3.536  | -2.278 | 1.00 | 0.00 |
| ATOM | 1004 | HB2  | LEU | 65 | 4.650 | 4.206  | -2.501 | 1.00 | 0.00 |
| ATOM | 1005 | HB3  | LEU | 65 | 4.108 | 2.857  | -1.475 | 1.00 | 0.00 |
| ATOM | 1006 | CG   | LEU | 65 | 3.467 | 2.725  | -3.530 | 1.00 | 0.00 |
| ATOM | 1007 | HG   | LEU | 65 | 3.238 | 3.405  | -4.350 | 1.00 | 0.00 |
| ATOM | 1008 | CD1  | LEU | 65 | 4.654 | 1.840  | -3.918 | 1.00 | 0.00 |
| ATOM | 1009 | HD11 | LEU | 65 | 4.884 | 1.159  | -3.098 | 1.00 | 0.00 |
| ATOM | 1010 | HD12 | LEU | 65 | 4.403 | 1.263  | -4.808 | 1.00 | 0.00 |

|      |      |      |     |    |       |        |        |      |      |
|------|------|------|-----|----|-------|--------|--------|------|------|
| ATOM | 1011 | HD13 | LEU | 65 | 5.523 | 2.465  | -4.124 | 1.00 | 0.00 |
| ATOM | 1012 | CD2  | LEU | 65 | 2.244 | 1.843  | -3.242 | 1.00 | 0.00 |
| ATOM | 1013 | HD21 | LEU | 65 | 1.398 | 2.472  | -2.967 | 1.00 | 0.00 |
| ATOM | 1014 | HD22 | LEU | 65 | 1.994 | 1.266  | -4.132 | 1.00 | 0.00 |
| ATOM | 1015 | HD23 | LEU | 65 | 2.472 | 1.162  | -2.421 | 1.00 | 0.00 |
| ATOM | 1016 | C    | LEU | 65 | 2.900 | 5.043  | -0.508 | 1.00 | 0.00 |
| ATOM | 1017 | O    | LEU | 65 | 2.425 | 4.603  | 0.537  | 1.00 | 0.00 |
| ATOM | 1018 | N    | ARG | 66 | 3.682 | 6.120  | -0.549 | 1.00 | 0.00 |
| ATOM | 1019 | H    | ARG | 66 | 4.070 | 6.447  | -1.422 | 1.00 | 0.00 |
| ATOM | 1020 | CA   | ARG | 66 | 4.020 | 6.843  | 0.673  | 1.00 | 0.00 |
| ATOM | 1021 | HA   | ARG | 66 | 4.565 | 6.190  | 1.356  | 1.00 | 0.00 |
| ATOM | 1022 | CB   | ARG | 66 | 4.904 | 8.049  | 0.340  | 1.00 | 0.00 |
| ATOM | 1023 | HB2  | ARG | 66 | 4.403 | 8.672  | -0.401 | 1.00 | 0.00 |
| ATOM | 1024 | HB3  | ARG | 66 | 5.079 | 8.631  | 1.245  | 1.00 | 0.00 |
| ATOM | 1025 | CG   | ARG | 66 | 6.244 | 7.565  | -0.222 | 1.00 | 0.00 |
| ATOM | 1026 | HG2  | ARG | 66 | 6.725 | 6.906  | 0.502  | 1.00 | 0.00 |
| ATOM | 1027 | HG3  | ARG | 66 | 6.073 | 7.020  | -1.150 | 1.00 | 0.00 |
| ATOM | 1028 | CD   | ARG | 66 | 7.150 | 8.769  | -0.496 | 1.00 | 0.00 |
| ATOM | 1029 | HD2  | ARG | 66 | 8.047 | 8.444  | -1.025 | 1.00 | 0.00 |
| ATOM | 1030 | HD3  | ARG | 66 | 6.618 | 9.502  | -1.101 | 1.00 | 0.00 |
| ATOM | 1031 | NE   | ARG | 66 | 7.550 | 9.400  | 0.760  | 1.00 | 0.00 |
| ATOM | 1032 | HE   | ARG | 66 | 7.089 | 10.243 | 1.070  | 1.00 | 0.00 |



|      |      |      |     |    |        |        |        |      |      |
|------|------|------|-----|----|--------|--------|--------|------|------|
| ATOM | 1033 | CZ   | ARG | 66 | 8.518  | 8.889  | 1.520  | 1.00 | 0.00 |
| ATOM | 1034 | NH1  | ARG | 66 | 9.138  | 7.800  | 1.151  | 1.00 | 0.00 |
| ATOM | 1035 | HH11 | ARG | 66 | 8.882  | 7.345  | 0.287  | 1.00 | 0.00 |
| ATOM | 1036 | HH12 | ARG | 66 | 9.871  | 7.418  | 1.732  | 1.00 | 0.00 |
| ATOM | 1037 | NH2  | ARG | 66 | 8.848  | 9.478  | 2.635  | 1.00 | 0.00 |
| ATOM | 1038 | HH21 | ARG | 66 | 8.369  | 10.320 | 2.919  | 1.00 | 0.00 |
| ATOM | 1039 | HH22 | ARG | 66 | 9.582  | 9.089  | 3.210  | 1.00 | 0.00 |
| ATOM | 1040 | C    | ARG | 66 | 2.756  | 7.319  | 1.385  | 1.00 | 0.00 |
| ATOM | 1041 | O    | ARG | 66 | 2.556  | 7.043  | 2.569  | 1.00 | 0.00 |
| ATOM | 1042 | N    | MET | 67 | 1.907  | 8.032  | 0.649  | 1.00 | 0.00 |
| ATOM | 1043 | H    | MET | 67 | 2.130  | 8.252  | -0.311 | 1.00 | 0.00 |
| ATOM | 1044 | CA   | MET | 67 | 0.658  | 8.545  | 1.205  | 1.00 | 0.00 |
| ATOM | 1045 | HA   | MET | 67 | 0.862  | 9.170  | 2.075  | 1.00 | 0.00 |
| ATOM | 1046 | CB   | MET | 67 | -0.068 | 9.391  | 0.153  | 1.00 | 0.00 |
| ATOM | 1047 | HB2  | MET | 67 | 0.442  | 10.348 | 0.043  | 1.00 | 0.00 |
| ATOM | 1048 | HB3  | MET | 67 | -0.062 | 8.865  | -0.802 | 1.00 | 0.00 |
| ATOM | 1049 | CG   | MET | 67 | -1.516 | 9.631  | 0.595  | 1.00 | 0.00 |
| ATOM | 1050 | HG2  | MET | 67 | -2.072 | 8.695  | 0.551  | 1.00 | 0.00 |
| ATOM | 1051 | HG3  | MET | 67 | -1.529 | 10.012 | 1.616  | 1.00 | 0.00 |
| ATOM | 1052 | SD   | MET | 67 | -2.298 | 10.842 | -0.503 | 1.00 | 0.00 |
| ATOM | 1053 | CE   | MET | 67 | -1.315 | 12.280 | -0.007 | 1.00 | 0.00 |
| ATOM | 1054 | HE1  | MET | 67 | -0.261 | 12.087 | -0.208 | 1.00 | 0.00 |

|      |      |     |     |    |        |        |        |      |      |
|------|------|-----|-----|----|--------|--------|--------|------|------|
| ATOM | 1055 | HE2 | MET | 67 | -1.638 | 13.154 | -0.572 | 1.00 | 0.00 |
| ATOM | 1056 | HE3 | MET | 67 | -1.453 | 12.465 | 1.058  | 1.00 | 0.00 |
| ATOM | 1057 | C   | MET | 67 | -0.255 | 7.414  | 1.671  | 1.00 | 0.00 |
| ATOM | 1058 | O   | MET | 67 | -0.793 | 7.452  | 2.778  | 1.00 | 0.00 |
| ATOM | 1059 | N   | MET | 68 | -0.442 | 6.424  | 0.805  | 1.00 | 0.00 |
| ATOM | 1060 | H   | MET | 68 | -0.007 | 6.455  | -0.106 | 1.00 | 0.00 |
| ATOM | 1061 | CA  | MET | 68 | -1.314 | 5.297  | 1.116  | 1.00 | 0.00 |
| ATOM | 1062 | HA  | MET | 68 | -2.312 | 5.649  | 1.374  | 1.00 | 0.00 |
| ATOM | 1063 | CB  | MET | 68 | -1.418 | 4.385  | -0.110 | 1.00 | 0.00 |
| ATOM | 1064 | HB2 | MET | 68 | -2.123 | 4.818  | -0.819 | 1.00 | 0.00 |
| ATOM | 1065 | HB3 | MET | 68 | -0.437 | 4.302  | -0.578 | 1.00 | 0.00 |
| ATOM | 1066 | CG  | MET | 68 | -1.904 | 2.992  | 0.307  | 1.00 | 0.00 |
| ATOM | 1067 | HG2 | MET | 68 | -1.113 | 2.473  | 0.850  | 1.00 | 0.00 |
| ATOM | 1068 | HG3 | MET | 68 | -2.782 | 3.084  | 0.946  | 1.00 | 0.00 |
| ATOM | 1069 | SD  | MET | 68 | -2.339 | 2.038  | -1.166 | 1.00 | 0.00 |
| ATOM | 1070 | CE  | MET | 68 | -0.662 | 1.842  | -1.814 | 1.00 | 0.00 |
| ATOM | 1071 | HE1 | MET | 68 | -0.049 | 1.314  | -1.083 | 1.00 | 0.00 |
| ATOM | 1072 | HE2 | MET | 68 | -0.694 | 1.270  | -2.741 | 1.00 | 0.00 |
| ATOM | 1073 | HE3 | MET | 68 | -0.230 | 2.823  | -2.008 | 1.00 | 0.00 |
| ATOM | 1074 | C   | MET | 68 | -0.811 | 4.509  | 2.322  | 1.00 | 0.00 |
| ATOM | 1075 | O   | MET | 68 | -1.587 | 4.188  | 3.220  | 1.00 | 0.00 |
| ATOM | 1076 | N   | MET | 69 | 0.482  | 4.196  | 2.343  | 1.00 | 0.00 |

|      |      |     |     |    |       |       |       |      |      |
|------|------|-----|-----|----|-------|-------|-------|------|------|
| ATOM | 1077 | H   | MET | 69 | 1.094 | 4.457 | 1.583 | 1.00 | 0.00 |
| ATOM | 1078 | CA  | MET | 69 | 1.047 | 3.440 | 3.456 | 1.00 | 0.00 |
| ATOM | 1079 | HA  | MET | 69 | 0.650 | 2.425 | 3.459 | 1.00 | 0.00 |
| ATOM | 1080 | CB  | MET | 69 | 2.572 | 3.369 | 3.320 | 1.00 | 0.00 |
| ATOM | 1081 | HB2 | MET | 69 | 2.829 | 2.974 | 2.337 | 1.00 | 0.00 |
| ATOM | 1082 | HB3 | MET | 69 | 2.992 | 4.369 | 3.430 | 1.00 | 0.00 |
| ATOM | 1083 | CG  | MET | 69 | 3.146 | 2.453 | 4.404 | 1.00 | 0.00 |
| ATOM | 1084 | HG2 | MET | 69 | 2.842 | 2.810 | 5.388 | 1.00 | 0.00 |
| ATOM | 1085 | HG3 | MET | 69 | 2.781 | 1.436 | 4.259 | 1.00 | 0.00 |
| ATOM | 1086 | SD  | MET | 69 | 4.953 | 2.456 | 4.302 | 1.00 | 0.00 |
| ATOM | 1087 | CE  | MET | 69 | 5.258 | 1.225 | 5.593 | 1.00 | 0.00 |
| ATOM | 1088 | HE1 | MET | 69 | 4.780 | 0.284 | 5.319 | 1.00 | 0.00 |
| ATOM | 1089 | HE2 | MET | 69 | 6.332 | 1.068 | 5.701 | 1.00 | 0.00 |
| ATOM | 1090 | HE3 | MET | 69 | 4.847 | 1.579 | 6.538 | 1.00 | 0.00 |
| ATOM | 1091 | C   | MET | 69 | 0.677 | 4.095 | 4.784 | 1.00 | 0.00 |
| ATOM | 1092 | O   | MET | 69 | 0.119 | 3.451 | 5.673 | 1.00 | 0.00 |
| ATOM | 1093 | N   | ARG | 70 | 0.987 | 5.382 | 4.902 | 1.00 | 0.00 |
| ATOM | 1094 | H   | ARG | 70 | 1.460 | 5.860 | 4.149 | 1.00 | 0.00 |
| ATOM | 1095 | CA  | ARG | 70 | 0.682 | 6.133 | 6.115 | 1.00 | 0.00 |
| ATOM | 1096 | HA  | ARG | 70 | 1.159 | 5.667 | 6.978 | 1.00 | 0.00 |
| ATOM | 1097 | CB  | ARG | 70 | 1.211 | 7.564 | 5.977 | 1.00 | 0.00 |
| ATOM | 1098 | HB2 | ARG | 70 | 0.772 | 8.031 | 5.096 | 1.00 | 0.00 |

|      |      |      |     |    |        |        |       |      |      |
|------|------|------|-----|----|--------|--------|-------|------|------|
| ATOM | 1099 | HB3  | ARG | 70 | 0.943  | 8.138  | 6.864 | 1.00 | 0.00 |
| ATOM | 1100 | CG   | ARG | 70 | 2.736  | 7.532  | 5.832 | 1.00 | 0.00 |
| ATOM | 1101 | HG2  | ARG | 70 | 3.174  | 7.059  | 6.711 | 1.00 | 0.00 |
| ATOM | 1102 | HG3  | ARG | 70 | 3.004  | 6.961  | 4.943 | 1.00 | 0.00 |
| ATOM | 1103 | CD   | ARG | 70 | 3.271  | 8.960  | 5.702 | 1.00 | 0.00 |
| ATOM | 1104 | HD2  | ARG | 70 | 2.703  | 9.503  | 4.947 | 1.00 | 0.00 |
| ATOM | 1105 | HD3  | ARG | 70 | 3.190  | 9.476  | 6.659 | 1.00 | 0.00 |
| ATOM | 1106 | NE   | ARG | 70 | 4.675  | 8.935  | 5.302 | 1.00 | 0.00 |
| ATOM | 1107 | HE   | ARG | 70 | 5.251  | 8.137  | 5.531 | 1.00 | 0.00 |
| ATOM | 1108 | CZ   | ARG | 70 | 5.227  | 9.948  | 4.634 | 1.00 | 0.00 |
| ATOM | 1109 | NH1  | ARG | 70 | 4.518  | 11.003 | 4.330 | 1.00 | 0.00 |
| ATOM | 1110 | HH11 | ARG | 70 | 3.547  | 11.050 | 4.603 | 1.00 | 0.00 |
| ATOM | 1111 | HH12 | ARG | 70 | 4.945  | 11.765 | 3.824 | 1.00 | 0.00 |
| ATOM | 1112 | NH2  | ARG | 70 | 6.482  | 9.887  | 4.282 | 1.00 | 0.00 |
| ATOM | 1113 | HH21 | ARG | 70 | 7.031  | 9.072  | 4.518 | 1.00 | 0.00 |
| ATOM | 1114 | HH22 | ARG | 70 | 6.900  | 10.655 | 3.776 | 1.00 | 0.00 |
| ATOM | 1115 | C    | ARG | 70 | -0.824 | 6.168  | 6.375 | 1.00 | 0.00 |
| ATOM | 1116 | O    | ARG | 70 | -1.270 | 6.016  | 7.512 | 1.00 | 0.00 |
| ATOM | 1117 | N    | MET | 71 | -1.598 | 6.377  | 5.309 | 1.00 | 0.00 |
| ATOM | 1118 | H    | MET | 71 | -1.178 | 6.519  | 4.402 | 1.00 | 0.00 |
| ATOM | 1119 | CA   | MET | 71 | -3.050 | 6.442  | 5.417 | 1.00 | 0.00 |
| ATOM | 1120 | HA   | MET | 71 | -3.337 | 7.189  | 6.157 | 1.00 | 0.00 |

|      |      |     |     |    |        |       |       |      |      |
|------|------|-----|-----|----|--------|-------|-------|------|------|
| ATOM | 1121 | CB  | MET | 71 | -3.656 | 6.833 | 4.066 | 1.00 | 0.00 |
| ATOM | 1122 | HB2 | MET | 71 | -3.140 | 7.712 | 3.679 | 1.00 | 0.00 |
| ATOM | 1123 | HB3 | MET | 71 | -3.540 | 6.006 | 3.365 | 1.00 | 0.00 |
| ATOM | 1124 | CG  | MET | 71 | -5.145 | 7.150 | 4.241 | 1.00 | 0.00 |
| ATOM | 1125 | HG2 | MET | 71 | -5.648 | 6.304 | 4.710 | 1.00 | 0.00 |
| ATOM | 1126 | HG3 | MET | 71 | -5.261 | 8.034 | 4.868 | 1.00 | 0.00 |
| ATOM | 1127 | SD  | MET | 71 | -5.893 | 7.466 | 2.622 | 1.00 | 0.00 |
| ATOM | 1128 | CE  | MET | 71 | -4.956 | 8.961 | 2.215 | 1.00 | 0.00 |
| ATOM | 1129 | HE1 | MET | 71 | -3.891 | 8.728 | 2.194 | 1.00 | 0.00 |
| ATOM | 1130 | HE2 | MET | 71 | -5.266 | 9.330 | 1.238 | 1.00 | 0.00 |
| ATOM | 1131 | HE3 | MET | 71 | -5.145 | 9.725 | 2.969 | 1.00 | 0.00 |
| ATOM | 1132 | C   | MET | 71 | -3.621 | 5.106 | 5.872 | 1.00 | 0.00 |
| ATOM | 1133 | O   | MET | 71 | -4.569 | 5.062 | 6.656 | 1.00 | 0.00 |
| ATOM | 1134 | N   | MET | 72 | -3.048 | 4.020 | 5.365 | 1.00 | 0.00 |
| ATOM | 1135 | H   | MET | 72 | -2.286 | 4.096 | 4.706 | 1.00 | 0.00 |
| ATOM | 1136 | CA  | MET | 72 | -3.522 | 2.691 | 5.721 | 1.00 | 0.00 |
| ATOM | 1137 | HA  | MET | 72 | -4.557 | 2.566 | 5.404 | 1.00 | 0.00 |
| ATOM | 1138 | CB  | MET | 72 | -2.666 | 1.625 | 5.029 | 1.00 | 0.00 |
| ATOM | 1139 | HB2 | MET | 72 | -1.615 | 1.906 | 5.100 | 1.00 | 0.00 |
| ATOM | 1140 | HB3 | MET | 72 | -2.819 | 0.665 | 5.523 | 1.00 | 0.00 |
| ATOM | 1141 | CG  | MET | 72 | -3.065 | 1.510 | 3.555 | 1.00 | 0.00 |
| ATOM | 1142 | HG2 | MET | 72 | -3.036 | 2.494 | 3.088 | 1.00 | 0.00 |

|      |      |          |    |        |        |        |      |      |
|------|------|----------|----|--------|--------|--------|------|------|
| ATOM | 1143 | HG3 MET  | 72 | -2.375 | 0.842  | 3.038  | 1.00 | 0.00 |
| ATOM | 1144 | SD MET   | 72 | -4.744 | 0.842  | 3.433  | 1.00 | 0.00 |
| ATOM | 1145 | CE MET   | 72 | -4.400 | -0.782 | 4.158  | 1.00 | 0.00 |
| ATOM | 1146 | HE1 MET  | 72 | -4.024 | -0.655 | 5.174  | 1.00 | 0.00 |
| ATOM | 1147 | HE2 MET  | 72 | -5.316 | -1.372 | 4.181  | 1.00 | 0.00 |
| ATOM | 1148 | HE3 MET  | 72 | -3.651 | -1.298 | 3.557  | 1.00 | 0.00 |
| ATOM | 1149 | C MET    | 72 | -3.475 | 2.483  | 7.229  | 1.00 | 0.00 |
| ATOM | 1150 | O MET    | 72 | -4.490 | 2.167  | 7.853  | 1.00 | 0.00 |
| ATOM | 1151 | N GLN    | 73 | -2.293 | 2.669  | 7.807  | 1.00 | 0.00 |
| ATOM | 1152 | H GLN    | 73 | -1.483 | 2.905  | 7.251  | 1.00 | 0.00 |
| ATOM | 1153 | CA GLN   | 73 | -2.120 | 2.508  | 9.245  | 1.00 | 0.00 |
| ATOM | 1154 | HA GLN   | 73 | -2.409 | 1.500  | 9.545  | 1.00 | 0.00 |
| ATOM | 1155 | CB GLN   | 73 | -0.654 | 2.730  | 9.626  | 1.00 | 0.00 |
| ATOM | 1156 | HB2 GLN  | 73 | -0.360 | 3.744  | 9.357  | 1.00 | 0.00 |
| ATOM | 1157 | HB3 GLN  | 73 | -0.535 | 2.591  | 10.701 | 1.00 | 0.00 |
| ATOM | 1158 | CG GLN   | 73 | 0.232  | 1.728  | 8.881  | 1.00 | 0.00 |
| ATOM | 1159 | HG2 GLN  | 73 | 0.247  | 1.945  | 7.813  | 1.00 | 0.00 |
| ATOM | 1160 | HG3 GLN  | 73 | 1.247  | 1.780  | 9.276  | 1.00 | 0.00 |
| ATOM | 1161 | CD GLN   | 73 | -0.296 | 0.314  | 9.083  | 1.00 | 0.00 |
| ATOM | 1162 | OE1 GLN  | 73 | -0.260 | -0.213 | 10.195 | 1.00 | 0.00 |
| ATOM | 1163 | NE2 GLN  | 73 | -0.803 | -0.327 | 8.069  | 1.00 | 0.00 |
| ATOM | 1164 | HE21 GLN | 73 | -1.155 | -1.266 | 8.194  | 1.00 | 0.00 |

|      |      |      |     |    |        |       |        |      |      |
|------|------|------|-----|----|--------|-------|--------|------|------|
| ATOM | 1165 | HE22 | GLN | 73 | -0.841 | 0.117 | 7.163  | 1.00 | 0.00 |
| ATOM | 1166 | C    | GLN | 73 | -3.005 | 3.490 | 10.006 | 1.00 | 0.00 |
| ATOM | 1167 | O    | GLN | 73 | -3.600 | 3.146 | 11.023 | 1.00 | 0.00 |
| ATOM | 1168 | N    | GLN | 74 | -3.077 | 4.717 | 9.503  | 1.00 | 0.00 |
| ATOM | 1169 | H    | GLN | 74 | -2.542 | 4.965 | 8.683  | 1.00 | 0.00 |
| ATOM | 1170 | CA   | GLN | 74 | -3.882 | 5.751 | 10.142 | 1.00 | 0.00 |
| ATOM | 1171 | HA   | GLN | 74 | -3.572 | 5.882 | 11.179 | 1.00 | 0.00 |
| ATOM | 1172 | CB   | GLN | 74 | -3.695 | 7.080 | 9.403  | 1.00 | 0.00 |
| ATOM | 1173 | HB2  | GLN | 74 | -2.758 | 7.541 | 9.716  | 1.00 | 0.00 |
| ATOM | 1174 | HB3  | GLN | 74 | -3.668 | 6.897 | 8.329  | 1.00 | 0.00 |
| ATOM | 1175 | CG   | GLN | 74 | -4.859 | 8.017 | 9.732  | 1.00 | 0.00 |
| ATOM | 1176 | HG2  | GLN | 74 | -5.401 | 7.654 | 10.606 | 1.00 | 0.00 |
| ATOM | 1177 | HG3  | GLN | 74 | -4.483 | 9.021 | 9.930  | 1.00 | 0.00 |
| ATOM | 1178 | CD   | GLN | 74 | -5.822 | 8.081 | 8.553  | 1.00 | 0.00 |
| ATOM | 1179 | OE1  | GLN | 74 | -5.852 | 7.095 | 7.702  | 1.00 | 0.00 |
| ATOM | 1180 | NE2  | GLN | 74 | -6.567 | 9.050 | 8.407  | 1.00 | 0.00 |
| ATOM | 1181 | HE21 | GLN | 74 | -7.201 | 9.081 | 7.622  | 1.00 | 0.00 |
| ATOM | 1182 | HE22 | GLN | 74 | -6.540 | 9.808 | 9.074  | 1.00 | 0.00 |
| ATOM | 1183 | C    | GLN | 74 | -5.362 | 5.373 | 10.178 | 1.00 | 0.00 |
| ATOM | 1184 | O    | GLN | 74 | -6.032 | 5.564 | 11.194 | 1.00 | 0.00 |
| ATOM | 1185 | N    | LYS | 75 | -5.867 | 4.851 | 9.067  | 1.00 | 0.00 |
| ATOM | 1186 | H    | LYS | 75 | -5.288 | 4.722 | 8.249  | 1.00 | 0.00 |

|      |      |     |     |    |         |       |        |      |      |
|------|------|-----|-----|----|---------|-------|--------|------|------|
| ATOM | 1187 | CA  | LYS | 75 | -7.274  | 4.473 | 8.986  | 1.00 | 0.00 |
| ATOM | 1188 | HA  | LYS | 75 | -7.908  | 5.344 | 9.151  | 1.00 | 0.00 |
| ATOM | 1189 | CB  | LYS | 75 | -7.574  | 3.904 | 7.596  | 1.00 | 0.00 |
| ATOM | 1190 | HB2 | LYS | 75 | -7.242  | 4.613 | 6.838  | 1.00 | 0.00 |
| ATOM | 1191 | HB3 | LYS | 75 | -7.040  | 2.962 | 7.470  | 1.00 | 0.00 |
| ATOM | 1192 | CG  | LYS | 75 | -9.081  | 3.662 | 7.445  | 1.00 | 0.00 |
| ATOM | 1193 | HG2 | LYS | 75 | -9.257  | 3.005 | 6.593  | 1.00 | 0.00 |
| ATOM | 1194 | HG3 | LYS | 75 | -9.463  | 3.191 | 8.351  | 1.00 | 0.00 |
| ATOM | 1195 | CD  | LYS | 75 | -9.802  | 4.995 | 7.219  | 1.00 | 0.00 |
| ATOM | 1196 | HD2 | LYS | 75 | -9.684  | 5.625 | 8.101  | 1.00 | 0.00 |
| ATOM | 1197 | HD3 | LYS | 75 | -9.372  | 5.498 | 6.353  | 1.00 | 0.00 |
| ATOM | 1198 | CE  | LYS | 75 | -11.290 | 4.737 | 6.972  | 1.00 | 0.00 |
| ATOM | 1199 | HE2 | LYS | 75 | -11.679 | 4.083 | 7.752  | 1.00 | 0.00 |
| ATOM | 1200 | HE3 | LYS | 75 | -11.830 | 5.683 | 6.989  | 1.00 | 0.00 |
| ATOM | 1201 | NZ  | LYS | 75 | -11.469 | 4.086 | 5.643  | 1.00 | 0.00 |
| ATOM | 1202 | HZ1 | LYS | 75 | -10.968 | 3.208 | 5.628  | 1.00 | 0.00 |
| ATOM | 1203 | HZ2 | LYS | 75 | -12.451 | 3.916 | 5.481  | 1.00 | 0.00 |
| ATOM | 1204 | HZ3 | LYS | 75 | -11.108 | 4.692 | 4.920  | 1.00 | 0.00 |
| ATOM | 1205 | C   | LYS | 75 | -7.622  | 3.436 | 10.050 | 1.00 | 0.00 |
| ATOM | 1206 | O   | LYS | 75 | -8.677  | 3.510 | 10.682 | 1.00 | 0.00 |
| ATOM | 1207 | N   | GLU | 76 | -6.728  | 2.475 | 10.237 | 1.00 | 0.00 |
| ATOM | 1208 | H   | GLU | 76 | -5.886  | 2.442 | 9.679  | 1.00 | 0.00 |



|      |      |     |     |    |        |        |        |      |      |
|------|------|-----|-----|----|--------|--------|--------|------|------|
| ATOM | 1209 | CA  | GLU | 76 | -6.945 | 1.420  | 11.226 | 1.00 | 0.00 |
| ATOM | 1210 | HA  | GLU | 76 | -7.259 | 1.854  | 12.175 | 1.00 | 0.00 |
| ATOM | 1211 | CB  | GLU | 76 | -8.042 | 0.464  | 10.737 | 1.00 | 0.00 |
| ATOM | 1212 | HB2 | GLU | 76 | -8.913 | 1.042  | 10.430 | 1.00 | 0.00 |
| ATOM | 1213 | HB3 | GLU | 76 | -7.669 | -0.109 | 9.888  | 1.00 | 0.00 |
| ATOM | 1214 | CG  | GLU | 76 | -8.438 | -0.497 | 11.868 | 1.00 | 0.00 |
| ATOM | 1215 | HG2 | GLU | 76 | -9.102 | -1.262 | 11.465 | 1.00 | 0.00 |
| ATOM | 1216 | HG3 | GLU | 76 | -7.538 | -0.969 | 12.263 | 1.00 | 0.00 |
| ATOM | 1217 | CD  | GLU | 76 | -9.152 | 0.257  | 12.991 | 1.00 | 0.00 |
| ATOM | 1218 | OE1 | GLU | 76 | -9.770 | 1.273  | 12.708 | 1.00 | 0.00 |
| ATOM | 1219 | OE2 | GLU | 76 | -9.070 | -0.193 | 14.122 | 1.00 | 0.00 |
| ATOM | 1220 | C   | GLU | 76 | -5.654 | 0.644  | 11.478 | 1.00 | 0.00 |
| ATOM | 1221 | O   | GLU | 76 | -5.497 | -0.483 | 11.004 | 1.00 | 0.00 |
| ATOM | 1222 | N   | MET | 77 | -4.729 | 1.253  | 12.213 | 1.00 | 0.00 |
| ATOM | 1223 | H   | MET | 77 | -4.884 | 2.188  | 12.561 | 1.00 | 0.00 |
| ATOM | 1224 | CA  | MET | 77 | -3.453 | 0.607  | 12.511 | 1.00 | 0.00 |
| ATOM | 1225 | HA  | MET | 77 | -2.901 | 0.426  | 11.589 | 1.00 | 0.00 |
| ATOM | 1226 | CB  | MET | 77 | -2.608 | 1.509  | 13.419 | 1.00 | 0.00 |
| ATOM | 1227 | HB2 | MET | 77 | -2.542 | 2.504  | 12.980 | 1.00 | 0.00 |
| ATOM | 1228 | HB3 | MET | 77 | -3.077 | 1.576  | 14.401 | 1.00 | 0.00 |
| ATOM | 1229 | CG  | MET | 77 | -1.201 | 0.922  | 13.566 | 1.00 | 0.00 |
| ATOM | 1230 | HG2 | MET | 77 | -1.264 | -0.097 | 13.948 | 1.00 | 0.00 |

|      |      |          |    |        |        |        |      |      |
|------|------|----------|----|--------|--------|--------|------|------|
| ATOM | 1231 | HG3 MET  | 77 | -0.701 | 0.915  | 12.598 | 1.00 | 0.00 |
| ATOM | 1232 | SD MET   | 77 | -0.244 | 1.932  | 14.722 | 1.00 | 0.00 |
| ATOM | 1233 | CE MET   | 77 | 1.325  | 1.046  | 14.556 | 1.00 | 0.00 |
| ATOM | 1234 | HE1 MET  | 77 | 1.658  | 1.087  | 13.519 | 1.00 | 0.00 |
| ATOM | 1235 | HE2 MET  | 77 | 2.075  | 1.510  | 15.197 | 1.00 | 0.00 |
| ATOM | 1236 | HE3 MET  | 77 | 1.189  | 0.006  | 14.853 | 1.00 | 0.00 |
| ATOM | 1237 | C MET    | 77 | -3.671 | -0.746 | 13.188 | 1.00 | 0.00 |
| ATOM | 1238 | O MET    | 77 | -3.784 | -0.822 | 14.413 | 1.00 | 0.00 |
| ATOM | 1239 | N GLN    | 78 | -3.715 | -1.810 | 12.389 | 1.00 | 0.00 |
| ATOM | 1240 | H GLN    | 78 | -3.634 | -1.705 | 11.388 | 1.00 | 0.00 |
| ATOM | 1241 | CA GLN   | 78 | -3.900 | -3.153 | 12.931 | 1.00 | 0.00 |
| ATOM | 1242 | HA GLN   | 78 | -4.886 | -3.239 | 13.388 | 1.00 | 0.00 |
| ATOM | 1243 | CB GLN   | 78 | -3.787 | -4.194 | 11.810 | 1.00 | 0.00 |
| ATOM | 1244 | HB2 GLN  | 78 | -3.363 | -3.725 | 10.922 | 1.00 | 0.00 |
| ATOM | 1245 | HB3 GLN  | 78 | -3.138 | -5.008 | 12.136 | 1.00 | 0.00 |
| ATOM | 1246 | CG GLN   | 78 | -5.176 | -4.750 | 11.480 | 1.00 | 0.00 |
| ATOM | 1247 | HG2 GLN  | 78 | -5.623 | -5.190 | 12.372 | 1.00 | 0.00 |
| ATOM | 1248 | HG3 GLN  | 78 | -5.818 | -3.952 | 11.109 | 1.00 | 0.00 |
| ATOM | 1249 | CD GLN   | 78 | -5.067 | -5.829 | 10.405 | 1.00 | 0.00 |
| ATOM | 1250 | OE1 GLN  | 78 | -4.255 | -6.747 | 10.524 | 1.00 | 0.00 |
| ATOM | 1251 | NE2 GLN  | 78 | -5.842 | -5.773 | 9.356  | 1.00 | 0.00 |
| ATOM | 1252 | HE21 GLN | 78 | -5.773 | -6.485 | 8.643  | 1.00 | 0.00 |

|      |      |      |     |    |        |        |        |      |      |
|------|------|------|-----|----|--------|--------|--------|------|------|
| ATOM | 1253 | HE22 | GLN | 78 | -6.506 | -5.019 | 9.263  | 1.00 | 0.00 |
| ATOM | 1254 | C    | GLN | 78 | -2.841 | -3.425 | 14.000 | 1.00 | 0.00 |
| ATOM | 1255 | O    | GLN | 78 | -1.662 | -3.135 | 13.789 | 1.00 | 0.00 |
| ATOM | 1256 | N    | PRO | 79 | -3.221 | -3.965 | 15.132 | 1.00 | 0.00 |
| ATOM | 1257 | CD   | PRO | 79 | -4.584 | -4.360 | 15.506 | 1.00 | 0.00 |
| ATOM | 1258 | HD2  | PRO | 79 | -4.862 | -5.257 | 14.952 | 1.00 | 0.00 |
| ATOM | 1259 | HD3  | PRO | 79 | -5.272 | -3.552 | 15.259 | 1.00 | 0.00 |
| ATOM | 1260 | CG   | PRO | 79 | -4.490 | -4.607 | 17.020 | 1.00 | 0.00 |
| ATOM | 1261 | HG2  | PRO | 79 | -4.603 | -5.674 | 17.213 | 1.00 | 0.00 |
| ATOM | 1262 | HG3  | PRO | 79 | -5.290 | -4.061 | 17.519 | 1.00 | 0.00 |
| ATOM | 1263 | CB   | PRO | 79 | -3.152 | -4.112 | 17.461 | 1.00 | 0.00 |
| ATOM | 1264 | HB2  | PRO | 79 | -2.794 | -4.772 | 18.252 | 1.00 | 0.00 |
| ATOM | 1265 | HB3  | PRO | 79 | -3.130 | -3.081 | 17.812 | 1.00 | 0.00 |
| ATOM | 1266 | CA   | PRO | 79 | -2.273 | -4.259 | 16.228 | 1.00 | 0.00 |
| ATOM | 1267 | HA   | PRO | 79 | -1.452 | -3.544 | 16.177 | 1.00 | 0.00 |
| ATOM | 1268 | C    | PRO | 79 | -1.720 | -5.672 | 16.123 | 1.00 | 0.00 |
| ATOM | 1269 | O    | PRO | 79 | -2.440 | -6.654 | 16.312 | 1.00 | 0.00 |
| ATOM | 1270 | N    | ARG | 80 | -0.438 | -5.754 | 15.833 | 1.00 | 0.00 |
| ATOM | 1271 | H    | ARG | 80 | 0.097  | -4.913 | 15.669 | 1.00 | 0.00 |
| ATOM | 1272 | CA   | ARG | 80 | 0.238  | -7.036 | 15.711 | 1.00 | 0.00 |
| ATOM | 1273 | HA   | ARG | 80 | 0.115  | -7.607 | 16.632 | 1.00 | 0.00 |
| ATOM | 1274 | CB   | ARG | 80 | -0.349 | -7.844 | 14.552 | 1.00 | 0.00 |

|      |      |          |    |        |         |        |      |      |
|------|------|----------|----|--------|---------|--------|------|------|
| ATOM | 1275 | HB2 ARG  | 80 | -1.053 | -7.226  | 13.996 | 1.00 | 0.00 |
| ATOM | 1276 | HB3 ARG  | 80 | 0.454  | -8.167  | 13.889 | 1.00 | 0.00 |
| ATOM | 1277 | CG ARG   | 80 | -1.076 | -9.072  | 15.107 | 1.00 | 0.00 |
| ATOM | 1278 | HG2 ARG  | 80 | -0.362 | -9.884  | 15.244 | 1.00 | 0.00 |
| ATOM | 1279 | HG3 ARG  | 80 | -1.529 | -8.822  | 16.067 | 1.00 | 0.00 |
| ATOM | 1280 | CD ARG   | 80 | -2.165 | -9.511  | 14.129 | 1.00 | 0.00 |
| ATOM | 1281 | HD2 ARG  | 80 | -2.008 | -9.035  | 13.161 | 1.00 | 0.00 |
| ATOM | 1282 | HD3 ARG  | 80 | -2.140 | -10.594 | 14.009 | 1.00 | 0.00 |
| ATOM | 1283 | NE ARG   | 80 | -3.482 | -9.125  | 14.633 | 1.00 | 0.00 |
| ATOM | 1284 | HE ARG   | 80 | -3.950 | -9.712  | 15.310 | 1.00 | 0.00 |
| ATOM | 1285 | CZ ARG   | 80 | -4.093 | -8.013  | 14.224 | 1.00 | 0.00 |
| ATOM | 1286 | NH1 ARG  | 80 | -3.517 | -7.221  | 13.360 | 1.00 | 0.00 |
| ATOM | 1287 | HH11 ARG | 80 | -2.602 | -7.453  | 12.999 | 1.00 | 0.00 |
| ATOM | 1288 | HH12 ARG | 80 | -3.988 | -6.381  | 13.057 | 1.00 | 0.00 |
| ATOM | 1289 | NH2 ARG  | 80 | -5.273 | -7.714  | 14.691 | 1.00 | 0.00 |
| ATOM | 1290 | HH21 ARG | 80 | -5.718 | -8.326  | 15.360 | 1.00 | 0.00 |
| ATOM | 1291 | HH22 ARG | 80 | -5.736 | -6.872  | 14.382 | 1.00 | 0.00 |
| ATOM | 1292 | C ARG    | 80 | 1.728  | -6.817  | 15.485 | 1.00 | 0.00 |
| ATOM | 1293 | O ARG    | 80 | 2.117  | -6.069  | 14.587 | 1.00 | 0.00 |
| ATOM | 1294 | N GLY    | 81 | 2.560  | -7.460  | 16.297 | 1.00 | 0.00 |
| ATOM | 1295 | H GLY    | 81 | 2.219  | -8.070  | 17.027 | 1.00 | 0.00 |
| ATOM | 1296 | CA GLY   | 81 | 3.999  | -7.298  | 16.151 | 1.00 | 0.00 |

|      |      |     |     |    |       |         |        |      |      |
|------|------|-----|-----|----|-------|---------|--------|------|------|
| ATOM | 1297 | HA2 | GLY | 81 | 4.202 | -6.302  | 15.759 | 1.00 | 0.00 |
| ATOM | 1298 | HA3 | GLY | 81 | 4.465 | -7.404  | 17.131 | 1.00 | 0.00 |
| ATOM | 1299 | C   | GLY | 81 | 4.595 | -8.336  | 15.203 | 1.00 | 0.00 |
| ATOM | 1300 | O   | GLY | 81 | 4.973 | -8.013  | 14.080 | 1.00 | 0.00 |
| ATOM | 1301 | N   | GLU | 82 | 4.689 | -9.576  | 15.673 | 1.00 | 0.00 |
| ATOM | 1302 | H   | GLU | 82 | 4.389 | -9.783  | 16.615 | 1.00 | 0.00 |
| ATOM | 1303 | CA  | GLU | 82 | 5.264 | -10.660 | 14.875 | 1.00 | 0.00 |
| ATOM | 1304 | HA  | GLU | 82 | 6.271 | -10.396 | 14.551 | 1.00 | 0.00 |
| ATOM | 1305 | CB  | GLU | 82 | 5.340 | -11.937 | 15.718 | 1.00 | 0.00 |
| ATOM | 1306 | HB2 | GLU | 82 | 4.356 | -12.155 | 16.133 | 1.00 | 0.00 |
| ATOM | 1307 | HB3 | GLU | 82 | 5.660 | -12.767 | 15.088 | 1.00 | 0.00 |
| ATOM | 1308 | CG  | GLU | 82 | 6.347 | -11.746 | 16.862 | 1.00 | 0.00 |
| ATOM | 1309 | HG2 | GLU | 82 | 6.639 | -12.726 | 17.240 | 1.00 | 0.00 |
| ATOM | 1310 | HG3 | GLU | 82 | 7.226 | -11.231 | 16.474 | 1.00 | 0.00 |
| ATOM | 1311 | CD  | GLU | 82 | 5.733 | -10.923 | 17.998 | 1.00 | 0.00 |
| ATOM | 1312 | OE1 | GLU | 82 | 4.520 | -10.944 | 18.143 | 1.00 | 0.00 |
| ATOM | 1313 | OE2 | GLU | 82 | 6.489 | -10.281 | 18.709 | 1.00 | 0.00 |
| ATOM | 1314 | C   | GLU | 82 | 4.473 | -10.948 | 13.597 | 1.00 | 0.00 |
| ATOM | 1315 | O   | GLU | 82 | 5.061 | -11.150 | 12.534 | 1.00 | 0.00 |
| ATOM | 1316 | N   | GLN | 83 | 3.147 | -11.007 | 13.707 | 1.00 | 0.00 |
| ATOM | 1317 | H   | GLN | 83 | 2.698 | -10.864 | 14.600 | 1.00 | 0.00 |
| ATOM | 1318 | CA  | GLN | 83 | 2.307 | -11.320 | 12.550 | 1.00 | 0.00 |

|      |      |      |     |    |        |         |        |      |      |
|------|------|------|-----|----|--------|---------|--------|------|------|
| ATOM | 1319 | HA   | GLN | 83 | 2.576  | -12.295 | 12.142 | 1.00 | 0.00 |
| ATOM | 1320 | CB   | GLN | 83 | 0.835  | -11.356 | 12.977 | 1.00 | 0.00 |
| ATOM | 1321 | HB2  | GLN | 83 | 0.725  | -12.022 | 13.833 | 1.00 | 0.00 |
| ATOM | 1322 | HB3  | GLN | 83 | 0.516  | -10.352 | 13.256 | 1.00 | 0.00 |
| ATOM | 1323 | CG   | GLN | 83 | -0.031 | -11.864 | 11.820 | 1.00 | 0.00 |
| ATOM | 1324 | HG2  | GLN | 83 | -1.084 | -11.685 | 12.036 | 1.00 | 0.00 |
| ATOM | 1325 | HG3  | GLN | 83 | 0.243  | -11.351 | 10.898 | 1.00 | 0.00 |
| ATOM | 1326 | CD   | GLN | 83 | 0.179  | -13.363 | 11.625 | 1.00 | 0.00 |
| ATOM | 1327 | OE1  | GLN | 83 | -0.216 | -14.161 | 12.474 | 1.00 | 0.00 |
| ATOM | 1328 | NE2  | GLN | 83 | 0.780  | -13.794 | 10.550 | 1.00 | 0.00 |
| ATOM | 1329 | HE21 | GLN | 83 | 0.921  | -14.786 | 10.417 | 1.00 | 0.00 |
| ATOM | 1330 | HE22 | GLN | 83 | 1.102  | -13.135 | 9.856  | 1.00 | 0.00 |
| ATOM | 1331 | C    | GLN | 83 | 2.485  | -10.307 | 11.416 | 1.00 | 0.00 |
| ATOM | 1332 | O    | GLN | 83 | 2.958  | -10.653 | 10.334 | 1.00 | 0.00 |
| ATOM | 1333 | N    | MET | 84 | 2.093  | -9.062  | 11.671 | 1.00 | 0.00 |
| ATOM | 1334 | H    | MET | 84 | 1.651  | -8.840  | 12.552 | 1.00 | 0.00 |
| ATOM | 1335 | CA   | MET | 84 | 2.203  | -8.008  | 10.665 | 1.00 | 0.00 |
| ATOM | 1336 | HA   | MET | 84 | 1.709  | -8.320  | 9.745  | 1.00 | 0.00 |
| ATOM | 1337 | CB   | MET | 84 | 1.538  | -6.726  | 11.166 | 1.00 | 0.00 |
| ATOM | 1338 | HB2  | MET | 84 | 1.799  | -6.564  | 12.212 | 1.00 | 0.00 |
| ATOM | 1339 | HB3  | MET | 84 | 1.881  | -5.880  | 10.571 | 1.00 | 0.00 |
| ATOM | 1340 | CG   | MET | 84 | 0.014  | -6.860  | 11.034 | 1.00 | 0.00 |

|      |      |         |    |        |        |        |      |      |
|------|------|---------|----|--------|--------|--------|------|------|
| ATOM | 1341 | HG2 MET | 84 | -0.253 | -7.026 | 9.991  | 1.00 | 0.00 |
| ATOM | 1342 | HG3 MET | 84 | -0.336 | -7.699 | 11.636 | 1.00 | 0.00 |
| ATOM | 1343 | SD MET  | 84 | -0.776 | -5.339 | 11.616 | 1.00 | 0.00 |
| ATOM | 1344 | CE MET  | 84 | -0.296 | -4.277 | 10.231 | 1.00 | 0.00 |
| ATOM | 1345 | HE1 MET | 84 | -0.701 | -4.683 | 9.304  | 1.00 | 0.00 |
| ATOM | 1346 | HE2 MET | 84 | -0.688 | -3.273 | 10.390 | 1.00 | 0.00 |
| ATOM | 1347 | HE3 MET | 84 | 0.791  | -4.236 | 10.164 | 1.00 | 0.00 |
| ATOM | 1348 | C MET   | 84 | 3.652  | -7.745 | 10.257 | 1.00 | 0.00 |
| ATOM | 1349 | O MET   | 84 | 3.910  | -7.348 | 9.122  | 1.00 | 0.00 |
| ATOM | 1350 | N ARG   | 85 | 4.599  | -7.960 | 11.171 | 1.00 | 0.00 |
| ATOM | 1351 | H ARG   | 85 | 4.371  | -8.266 | 12.106 | 1.00 | 0.00 |
| ATOM | 1352 | CA ARG  | 85 | 6.006  | -7.728 | 10.841 | 1.00 | 0.00 |
| ATOM | 1353 | HA ARG  | 85 | 6.181  | -6.663 | 10.692 | 1.00 | 0.00 |
| ATOM | 1354 | CB ARG  | 85 | 6.909  | -8.217 | 11.979 | 1.00 | 0.00 |
| ATOM | 1355 | HB2 ARG | 85 | 6.678  | -7.660 | 12.887 | 1.00 | 0.00 |
| ATOM | 1356 | HB3 ARG | 85 | 6.730  | -9.279 | 12.150 | 1.00 | 0.00 |
| ATOM | 1357 | CG ARG  | 85 | 8.380  | -8.001 | 11.609 | 1.00 | 0.00 |
| ATOM | 1358 | HG2 ARG | 85 | 8.635  | -8.619 | 10.748 | 1.00 | 0.00 |
| ATOM | 1359 | HG3 ARG | 85 | 8.545  | -6.952 | 11.365 | 1.00 | 0.00 |
| ATOM | 1360 | CD ARG  | 85 | 9.263  | -8.393 | 12.796 | 1.00 | 0.00 |
| ATOM | 1361 | HD2 ARG | 85 | 10.302 | -8.138 | 12.587 | 1.00 | 0.00 |
| ATOM | 1362 | HD3 ARG | 85 | 8.934  | -7.869 | 13.694 | 1.00 | 0.00 |

|      |      |      |     |    |       |         |        |      |      |
|------|------|------|-----|----|-------|---------|--------|------|------|
| ATOM | 1363 | NE   | ARG | 85 | 9.174 | -9.832  | 13.035 | 1.00 | 0.00 |
| ATOM | 1364 | HE   | ARG | 85 | 9.187 | -10.472 | 12.254 | 1.00 | 0.00 |
| ATOM | 1365 | CZ   | ARG | 85 | 9.071 | -10.334 | 14.266 | 1.00 | 0.00 |
| ATOM | 1366 | NH1  | ARG | 85 | 9.060 | -9.544  | 15.307 | 1.00 | 0.00 |
| ATOM | 1367 | HH11 | ARG | 85 | 9.130 | -8.545  | 15.180 | 1.00 | 0.00 |
| ATOM | 1368 | HH12 | ARG | 85 | 8.982 | -9.937  | 16.235 | 1.00 | 0.00 |
| ATOM | 1369 | NH2  | ARG | 85 | 8.985 | -11.625 | 14.433 | 1.00 | 0.00 |
| ATOM | 1370 | HH21 | ARG | 85 | 8.997 | -12.237 | 13.630 | 1.00 | 0.00 |
| ATOM | 1371 | HH22 | ARG | 85 | 8.907 | -12.007 | 15.365 | 1.00 | 0.00 |
| ATOM | 1372 | C    | ARG | 85 | 6.362 | -8.458  | 9.549  | 1.00 | 0.00 |
| ATOM | 1373 | O    | ARG | 85 | 6.986 | -7.887  | 8.655  | 1.00 | 0.00 |
| ATOM | 1374 | N    | ARG | 86 | 5.935 | -9.714  | 9.451  | 1.00 | 0.00 |
| ATOM | 1375 | H    | ARG | 86 | 5.442 | -10.149 | 10.218 | 1.00 | 0.00 |
| ATOM | 1376 | CA   | ARG | 86 | 6.186 | -10.506 | 8.253  | 1.00 | 0.00 |
| ATOM | 1377 | HA   | ARG | 86 | 7.258 | -10.575 | 8.067  | 1.00 | 0.00 |
| ATOM | 1378 | CB   | ARG | 86 | 5.630 | -11.920 | 8.440  | 1.00 | 0.00 |
| ATOM | 1379 | HB2  | ARG | 86 | 4.566 | -11.866 | 8.668  | 1.00 | 0.00 |
| ATOM | 1380 | HB3  | ARG | 86 | 5.777 | -12.493 | 7.525  | 1.00 | 0.00 |
| ATOM | 1381 | CG   | ARG | 86 | 6.365 | -12.607 | 9.595  | 1.00 | 0.00 |
| ATOM | 1382 | HG2  | ARG | 86 | 7.434 | -12.625 | 9.382  | 1.00 | 0.00 |
| ATOM | 1383 | HG3  | ARG | 86 | 6.188 | -12.052 | 10.516 | 1.00 | 0.00 |
| ATOM | 1384 | CD   | ARG | 86 | 5.854 | -14.039 | 9.758  | 1.00 | 0.00 |



|      |      |          |    |       |         |        |      |      |
|------|------|----------|----|-------|---------|--------|------|------|
| ATOM | 1385 | HD2 ARG  | 86 | 4.766 | -14.041 | 9.812  | 1.00 | 0.00 |
| ATOM | 1386 | HD3 ARG  | 86 | 6.177 | -14.647 | 8.913  | 1.00 | 0.00 |
| ATOM | 1387 | NE ARG   | 86 | 6.384 | -14.626 | 10.985 | 1.00 | 0.00 |
| ATOM | 1388 | HE ARG   | 86 | 7.112 | -14.150 | 11.499 | 1.00 | 0.00 |
| ATOM | 1389 | CZ ARG   | 86 | 5.928 | -15.785 | 11.455 | 1.00 | 0.00 |
| ATOM | 1390 | NH1 ARG  | 86 | 4.991 | -16.432 | 10.815 | 1.00 | 0.00 |
| ATOM | 1391 | HH11 ARG | 86 | 4.612 | -16.051 | 9.960  | 1.00 | 0.00 |
| ATOM | 1392 | HH12 ARG | 86 | 4.651 | -17.311 | 11.178 | 1.00 | 0.00 |
| ATOM | 1393 | NH2 ARG  | 86 | 6.421 | -16.278 | 12.557 | 1.00 | 0.00 |
| ATOM | 1394 | HH21 ARG | 86 | 7.148 | -15.778 | 13.050 | 1.00 | 0.00 |
| ATOM | 1395 | HH22 ARG | 86 | 6.075 | -17.158 | 12.913 | 1.00 | 0.00 |
| ATOM | 1396 | C ARG    | 86 | 5.530 | -9.843  | 7.043  | 1.00 | 0.00 |
| ATOM | 1397 | O ARG    | 86 | 6.084 | -9.835  | 5.943  | 1.00 | 0.00 |
| ATOM | 1398 | N MET    | 87 | 4.338 | -9.287  | 7.271  | 1.00 | 0.00 |
| ATOM | 1399 | H MET    | 87 | 3.930 | -9.339  | 8.194  | 1.00 | 0.00 |
| ATOM | 1400 | CA MET   | 87 | 3.583 | -8.614  | 6.216  | 1.00 | 0.00 |
| ATOM | 1401 | HA MET   | 87 | 3.307 | -9.329  | 5.441  | 1.00 | 0.00 |
| ATOM | 1402 | CB MET   | 87 | 2.303 | -8.002  | 6.796  | 1.00 | 0.00 |
| ATOM | 1403 | HB2 MET  | 87 | 1.780 | -8.754  | 7.387  | 1.00 | 0.00 |
| ATOM | 1404 | HB3 MET  | 87 | 2.564 | -7.157  | 7.433  | 1.00 | 0.00 |
| ATOM | 1405 | CG MET   | 87 | 1.395 | -7.524  | 5.658  | 1.00 | 0.00 |
| ATOM | 1406 | HG2 MET  | 87 | 2.003 | -7.112  | 4.853  | 1.00 | 0.00 |

|      |      |         |    |        |        |       |      |      |
|------|------|---------|----|--------|--------|-------|------|------|
| ATOM | 1407 | HG3 MET | 87 | 0.811  | -8.363 | 5.279 | 1.00 | 0.00 |
| ATOM | 1408 | SD MET  | 87 | 0.270  | -6.243 | 6.271 | 1.00 | 0.00 |
| ATOM | 1409 | CE MET  | 87 | -0.765 | -7.298 | 7.314 | 1.00 | 0.00 |
| ATOM | 1410 | HE1 MET | 87 | -0.148 | -7.771 | 8.079 | 1.00 | 0.00 |
| ATOM | 1411 | HE2 MET | 87 | -1.535 | -6.693 | 7.793 | 1.00 | 0.00 |
| ATOM | 1412 | HE3 MET | 87 | -1.235 | -8.067 | 6.701 | 1.00 | 0.00 |
| ATOM | 1413 | C MET   | 87 | 4.408  | -7.509 | 5.561 | 1.00 | 0.00 |
| ATOM | 1414 | O MET   | 87 | 4.219  | -7.206 | 4.385 | 1.00 | 0.00 |
| ATOM | 1415 | N MET   | 88 | 5.306  | -6.893 | 6.330 | 1.00 | 0.00 |
| ATOM | 1416 | H MET   | 88 | 5.429  | -7.162 | 7.296 | 1.00 | 0.00 |
| ATOM | 1417 | CA MET  | 88 | 6.126  | -5.805 | 5.805 | 1.00 | 0.00 |
| ATOM | 1418 | HA MET  | 88 | 5.520  | -4.913 | 5.651 | 1.00 | 0.00 |
| ATOM | 1419 | CB MET  | 88 | 7.232  | -5.477 | 6.808 | 1.00 | 0.00 |
| ATOM | 1420 | HB2 MET | 88 | 7.784  | -6.386 | 7.049 | 1.00 | 0.00 |
| ATOM | 1421 | HB3 MET | 88 | 7.912  | -4.746 | 6.371 | 1.00 | 0.00 |
| ATOM | 1422 | CG MET  | 88 | 6.615  | -4.900 | 8.088 | 1.00 | 0.00 |
| ATOM | 1423 | HG2 MET | 88 | 6.315  | -3.866 | 7.918 | 1.00 | 0.00 |
| ATOM | 1424 | HG3 MET | 88 | 5.743  | -5.489 | 8.374 | 1.00 | 0.00 |
| ATOM | 1425 | SD MET  | 88 | 7.834  | -4.954 | 9.426 | 1.00 | 0.00 |
| ATOM | 1426 | CE MET  | 88 | 9.263  | -4.404 | 8.464 | 1.00 | 0.00 |
| ATOM | 1427 | HE1 MET | 88 | 9.068  | -3.412 | 8.057 | 1.00 | 0.00 |
| ATOM | 1428 | HE2 MET | 88 | 10.142 | -4.365 | 9.108 | 1.00 | 0.00 |

|      |      |      |     |    |        |        |       |      |      |
|------|------|------|-----|----|--------|--------|-------|------|------|
| ATOM | 1429 | HE3  | MET | 88 | 9.443  | -5.103 | 7.647 | 1.00 | 0.00 |
| ATOM | 1430 | C    | MET | 88 | 6.752  | -6.192 | 4.470 | 1.00 | 0.00 |
| ATOM | 1431 | O    | MET | 88 | 6.613  | -5.472 | 3.481 | 1.00 | 0.00 |
| ATOM | 1432 | N    | ARG | 89 | 7.423  | -7.339 | 4.441 | 1.00 | 0.00 |
| ATOM | 1433 | H    | ARG | 89 | 7.534  | -7.895 | 5.277 | 1.00 | 0.00 |
| ATOM | 1434 | CA   | ARG | 89 | 8.043  | -7.812 | 3.210 | 1.00 | 0.00 |
| ATOM | 1435 | HA   | ARG | 89 | 8.767  | -7.080 | 2.851 | 1.00 | 0.00 |
| ATOM | 1436 | CB   | ARG | 89 | 8.771  | -9.136 | 3.464 | 1.00 | 0.00 |
| ATOM | 1437 | HB2  | ARG | 89 | 8.066  | -9.867 | 3.860 | 1.00 | 0.00 |
| ATOM | 1438 | HB3  | ARG | 89 | 9.189  | -9.505 | 2.528 | 1.00 | 0.00 |
| ATOM | 1439 | CG   | ARG | 89 | 9.902  | -8.917 | 4.477 | 1.00 | 0.00 |
| ATOM | 1440 | HG2  | ARG | 89 | 9.510  | -8.395 | 5.350 | 1.00 | 0.00 |
| ATOM | 1441 | HG3  | ARG | 89 | 10.306 | -9.882 | 4.783 | 1.00 | 0.00 |
| ATOM | 1442 | CD   | ARG | 89 | 11.013 | -8.078 | 3.837 | 1.00 | 0.00 |
| ATOM | 1443 | HD2  | ARG | 89 | 11.364 | -8.563 | 2.926 | 1.00 | 0.00 |
| ATOM | 1444 | HD3  | ARG | 89 | 10.634 | -7.085 | 3.597 | 1.00 | 0.00 |
| ATOM | 1445 | NE   | ARG | 89 | 12.138 | -7.939 | 4.756 | 1.00 | 0.00 |
| ATOM | 1446 | HE   | ARG | 89 | 12.948 | -8.535 | 4.658 | 1.00 | 0.00 |
| ATOM | 1447 | CZ   | ARG | 89 | 12.129 | -7.035 | 5.734 | 1.00 | 0.00 |
| ATOM | 1448 | NH1  | ARG | 89 | 11.092 | -6.258 | 5.901 | 1.00 | 0.00 |
| ATOM | 1449 | HH11 | ARG | 89 | 10.296 | -6.345 | 5.286 | 1.00 | 0.00 |
| ATOM | 1450 | HH12 | ARG | 89 | 11.092 | -5.575 | 6.645 | 1.00 | 0.00 |

|      |      |      |     |    |        |         |       |      |      |
|------|------|------|-----|----|--------|---------|-------|------|------|
| ATOM | 1451 | NH2  | ARG | 89 | 13.157 | -6.927  | 6.528 | 1.00 | 0.00 |
| ATOM | 1452 | HH21 | ARG | 89 | 13.957 | -7.530  | 6.399 | 1.00 | 0.00 |
| ATOM | 1453 | HH22 | ARG | 89 | 13.149 | -6.241  | 7.270 | 1.00 | 0.00 |
| ATOM | 1454 | C    | ARG | 89 | 6.982  | -7.999  | 2.128 | 1.00 | 0.00 |
| ATOM | 1455 | O    | ARG | 89 | 7.174  | -7.605  | 0.977 | 1.00 | 0.00 |
| ATOM | 1456 | N    | LEU | 90 | 5.856  | -8.594  | 2.519 | 1.00 | 0.00 |
| ATOM | 1457 | H    | LEU | 90 | 5.758  | -8.910  | 3.473 | 1.00 | 0.00 |
| ATOM | 1458 | CA   | LEU | 90 | 4.752  | -8.827  | 1.596 | 1.00 | 0.00 |
| ATOM | 1459 | HA   | LEU | 90 | 5.086  | -9.428  | 0.750 | 1.00 | 0.00 |
| ATOM | 1460 | CB   | LEU | 90 | 3.633  | -9.583  | 2.322 | 1.00 | 0.00 |
| ATOM | 1461 | HB2  | LEU | 90 | 4.050  | -10.460 | 2.818 | 1.00 | 0.00 |
| ATOM | 1462 | HB3  | LEU | 90 | 3.188  | -8.923  | 3.067 | 1.00 | 0.00 |
| ATOM | 1463 | CG   | LEU | 90 | 2.557  | -10.024 | 1.321 | 1.00 | 0.00 |
| ATOM | 1464 | HG   | LEU | 90 | 3.015  | -10.198 | 0.348 | 1.00 | 0.00 |
| ATOM | 1465 | CD1  | LEU | 90 | 1.901  | -11.317 | 1.814 | 1.00 | 0.00 |
| ATOM | 1466 | HD11 | LEU | 90 | 1.443  | -11.144 | 2.788 | 1.00 | 0.00 |
| ATOM | 1467 | HD12 | LEU | 90 | 1.137  | -11.631 | 1.104 | 1.00 | 0.00 |
| ATOM | 1468 | HD13 | LEU | 90 | 2.657  | -12.098 | 1.903 | 1.00 | 0.00 |
| ATOM | 1469 | CD2  | LEU | 90 | 1.487  | -8.932  | 1.202 | 1.00 | 0.00 |
| ATOM | 1470 | HD21 | LEU | 90 | 1.948  | -8.008  | 0.855 | 1.00 | 0.00 |
| ATOM | 1471 | HD22 | LEU | 90 | 0.724  | -9.247  | 0.491 | 1.00 | 0.00 |
| ATOM | 1472 | HD23 | LEU | 90 | 1.028  | -8.765  | 2.177 | 1.00 | 0.00 |

|      |      |     |     |    |       |        |        |      |      |
|------|------|-----|-----|----|-------|--------|--------|------|------|
| ATOM | 1473 | C   | LEU | 90 | 4.217 | -7.504 | 1.058  | 1.00 | 0.00 |
| ATOM | 1474 | O   | LEU | 90 | 3.892 | -7.388 | -0.124 | 1.00 | 0.00 |
| ATOM | 1475 | N   | ALA | 91 | 4.122 | -6.513 | 1.941  | 1.00 | 0.00 |
| ATOM | 1476 | H   | ALA | 91 | 4.383 | -6.663 | 2.906  | 1.00 | 0.00 |
| ATOM | 1477 | CA  | ALA | 91 | 3.617 | -5.201 | 1.557  | 1.00 | 0.00 |
| ATOM | 1478 | HA  | ALA | 91 | 2.577 | -5.276 | 1.240  | 1.00 | 0.00 |
| ATOM | 1479 | CB  | ALA | 91 | 3.698 | -4.241 | 2.747  | 1.00 | 0.00 |
| ATOM | 1480 | HB1 | ALA | 91 | 4.735 | -4.149 | 3.071  | 1.00 | 0.00 |
| ATOM | 1481 | HB2 | ALA | 91 | 3.323 | -3.262 | 2.451  | 1.00 | 0.00 |
| ATOM | 1482 | HB3 | ALA | 91 | 3.095 | -4.628 | 3.569  | 1.00 | 0.00 |
| ATOM | 1483 | C   | ALA | 91 | 4.419 | -4.642 | 0.390  | 1.00 | 0.00 |
| ATOM | 1484 | O   | ALA | 91 | 3.852 | -4.239 | -0.619 | 1.00 | 0.00 |
| ATOM | 1485 | N   | GLU | 92 | 5.741 | -4.630 | 0.538  | 1.00 | 0.00 |
| ATOM | 1486 | H   | GLU | 92 | 6.154 | -4.951 | 1.402  | 1.00 | 0.00 |
| ATOM | 1487 | CA  | GLU | 92 | 6.629 | -4.130 | -0.511 | 1.00 | 0.00 |
| ATOM | 1488 | HA  | GLU | 92 | 6.394 | -3.091 | -0.740 | 1.00 | 0.00 |
| ATOM | 1489 | CB  | GLU | 92 | 8.083 | -4.209 | -0.037 | 1.00 | 0.00 |
| ATOM | 1490 | HB2 | GLU | 92 | 8.176 | -3.707 | 0.926  | 1.00 | 0.00 |
| ATOM | 1491 | HB3 | GLU | 92 | 8.372 | -5.255 | 0.070  | 1.00 | 0.00 |
| ATOM | 1492 | CG  | GLU | 92 | 9.002 | -3.527 | -1.060 | 1.00 | 0.00 |
| ATOM | 1493 | HG2 | GLU | 92 | 8.850 | -3.990 | -2.035 | 1.00 | 0.00 |
| ATOM | 1494 | HG3 | GLU | 92 | 8.743 | -2.470 | -1.115 | 1.00 | 0.00 |

|      |      |      |     |    |        |         |        |      |      |
|------|------|------|-----|----|--------|---------|--------|------|------|
| ATOM | 1495 | CD   | GLU | 92 | 10.469 | -3.671  | -0.651 | 1.00 | 0.00 |
| ATOM | 1496 | OE1  | GLU | 92 | 10.732 | -4.307  | 0.360  | 1.00 | 0.00 |
| ATOM | 1497 | OE2  | GLU | 92 | 11.311 | -3.143  | -1.357 | 1.00 | 0.00 |
| ATOM | 1498 | C    | GLU | 92 | 6.461  | -4.932  | -1.801 | 1.00 | 0.00 |
| ATOM | 1499 | O    | GLU | 92 | 6.654  | -4.405  | -2.896 | 1.00 | 0.00 |
| ATOM | 1500 | N    | ASN | 93 | 6.117  | -6.210  | -1.662 | 1.00 | 0.00 |
| ATOM | 1501 | H    | ASN | 93 | 5.992  | -6.609  | -0.742 | 1.00 | 0.00 |
| ATOM | 1502 | CA   | ASN | 93 | 5.945  | -7.081  | -2.825 | 1.00 | 0.00 |
| ATOM | 1503 | HA   | ASN | 93 | 6.807  | -6.995  | -3.487 | 1.00 | 0.00 |
| ATOM | 1504 | CB   | ASN | 93 | 5.818  | -8.540  | -2.373 | 1.00 | 0.00 |
| ATOM | 1505 | HB2  | ASN | 93 | 4.996  | -8.638  | -1.664 | 1.00 | 0.00 |
| ATOM | 1506 | HB3  | ASN | 93 | 5.633  | -9.182  | -3.234 | 1.00 | 0.00 |
| ATOM | 1507 | CG   | ASN | 93 | 7.107  | -8.998  | -1.691 | 1.00 | 0.00 |
| ATOM | 1508 | OD1  | ASN | 93 | 8.122  | -8.182  | -1.603 | 1.00 | 0.00 |
| ATOM | 1509 | ND2  | ASN | 93 | 7.189  | -10.135 | -1.226 | 1.00 | 0.00 |
| ATOM | 1510 | HD21 | ASN | 93 | 8.043  | -10.433 | -0.776 | 1.00 | 0.00 |
| ATOM | 1511 | HD22 | ASN | 93 | 6.402  | -10.764 | -1.296 | 1.00 | 0.00 |
| ATOM | 1512 | C    | ASN | 93 | 4.710  | -6.691  | -3.638 | 1.00 | 0.00 |
| ATOM | 1513 | O    | ASN | 93 | 4.711  | -6.804  | -4.864 | 1.00 | 0.00 |
| ATOM | 1514 | N    | ILE | 94 | 3.658  | -6.239  | -2.955 | 1.00 | 0.00 |
| ATOM | 1515 | H    | ILE | 94 | 3.680  | -6.197  | -1.946 | 1.00 | 0.00 |
| ATOM | 1516 | CA   | ILE | 94 | 2.426  | -5.847  | -3.639 | 1.00 | 0.00 |

|      |      |      |     |    |        |        |        |      |      |
|------|------|------|-----|----|--------|--------|--------|------|------|
| ATOM | 1517 | HA   | ILE | 94 | 1.977  | -6.726 | -4.102 | 1.00 | 0.00 |
| ATOM | 1518 | CB   | ILE | 94 | 1.438  | -5.237 | -2.632 | 1.00 | 0.00 |
| ATOM | 1519 | HB   | ILE | 94 | 1.986  | -4.609 | -1.929 | 1.00 | 0.00 |
| ATOM | 1520 | CG2  | ILE | 94 | 0.390  | -4.390 | -3.365 | 1.00 | 0.00 |
| ATOM | 1521 | HG21 | ILE | 94 | -0.158 | -5.018 | -4.067 | 1.00 | 0.00 |
| ATOM | 1522 | HG22 | ILE | 94 | -0.304 | -3.964 | -2.641 | 1.00 | 0.00 |
| ATOM | 1523 | HG23 | ILE | 94 | 0.887  | -3.587 | -3.908 | 1.00 | 0.00 |
| ATOM | 1524 | CG1  | ILE | 94 | 0.734  | -6.368 | -1.870 | 1.00 | 0.00 |
| ATOM | 1525 | HG12 | ILE | 94 | -0.054 | -6.789 | -2.494 | 1.00 | 0.00 |
| ATOM | 1526 | HG13 | ILE | 94 | 1.459  | -7.146 | -1.626 | 1.00 | 0.00 |
| ATOM | 1527 | CD1  | ILE | 94 | 0.122  | -5.818 | -0.578 | 1.00 | 0.00 |
| ATOM | 1528 | HD11 | ILE | 94 | -0.602 | -5.041 | -0.820 | 1.00 | 0.00 |
| ATOM | 1529 | HD12 | ILE | 94 | -0.377 | -6.624 | -0.040 | 1.00 | 0.00 |
| ATOM | 1530 | HD13 | ILE | 94 | 0.910  | -5.398 | 0.048  | 1.00 | 0.00 |
| ATOM | 1531 | C    | ILE | 94 | 2.722  | -4.856 | -4.773 | 1.00 | 0.00 |
| ATOM | 1532 | O    | ILE | 94 | 2.369  | -5.106 | -5.925 | 1.00 | 0.00 |
| ATOM | 1533 | N    | PRO | 95 | 3.362  | -3.751 | -4.477 | 1.00 | 0.00 |
| ATOM | 1534 | CD   | PRO | 95 | 3.818  | -3.355 | -3.136 | 1.00 | 0.00 |
| ATOM | 1535 | HD2  | PRO | 95 | 4.389  | -4.174 | -2.698 | 1.00 | 0.00 |
| ATOM | 1536 | HD3  | PRO | 95 | 2.949  | -3.145 | -2.512 | 1.00 | 0.00 |
| ATOM | 1537 | CG   | PRO | 95 | 4.670  | -2.114 | -3.384 | 1.00 | 0.00 |
| ATOM | 1538 | HG2  | PRO | 95 | 5.720  | -2.403 | -3.445 | 1.00 | 0.00 |

|      |      |     |     |    |       |        |        |      |      |
|------|------|-----|-----|----|-------|--------|--------|------|------|
| ATOM | 1539 | HG3 | PRO | 95 | 4.535 | -1.412 | -2.561 | 1.00 | 0.00 |
| ATOM | 1540 | CB  | PRO | 95 | 4.191 | -1.529 | -4.666 | 1.00 | 0.00 |
| ATOM | 1541 | HB2 | PRO | 95 | 5.021 | -1.035 | -5.170 | 1.00 | 0.00 |
| ATOM | 1542 | HB3 | PRO | 95 | 3.376 | -0.820 | -4.527 | 1.00 | 0.00 |
| ATOM | 1543 | CA  | PRO | 95 | 3.711 | -2.720 | -5.499 | 1.00 | 0.00 |
| ATOM | 1544 | HA  | PRO | 95 | 2.808 | -2.492 | -6.065 | 1.00 | 0.00 |
| ATOM | 1545 | C   | PRO | 95 | 4.809 | -3.184 | -6.458 | 1.00 | 0.00 |
| ATOM | 1546 | O   | PRO | 95 | 4.904 | -2.689 | -7.577 | 1.00 | 0.00 |
| ATOM | 1547 | N   | SER | 96 | 5.628 | -4.144 | -6.018 | 1.00 | 0.00 |
| ATOM | 1548 | H   | SER | 96 | 5.522 | -4.518 | -5.086 | 1.00 | 0.00 |
| ATOM | 1549 | CA  | SER | 96 | 6.703 | -4.670 | -6.858 | 1.00 | 0.00 |
| ATOM | 1550 | HA  | SER | 96 | 7.364 | -3.858 | -7.161 | 1.00 | 0.00 |
| ATOM | 1551 | CB  | SER | 96 | 7.525 | -5.710 | -6.094 | 1.00 | 0.00 |
| ATOM | 1552 | HB2 | SER | 96 | 6.884 | -6.545 | -5.810 | 1.00 | 0.00 |
| ATOM | 1553 | HB3 | SER | 96 | 8.334 | -6.073 | -6.728 | 1.00 | 0.00 |
| ATOM | 1554 | OG  | SER | 96 | 8.070 | -5.114 | -4.926 | 1.00 | 0.00 |
| ATOM | 1555 | HG  | SER | 96 | 8.586 | -5.766 | -4.445 | 1.00 | 0.00 |
| ATOM | 1556 | C   | SER | 96 | 6.090 | -5.300 | -8.081 | 1.00 | 0.00 |
| ATOM | 1557 | O   | SER | 96 | 6.566 | -5.150 | -9.207 | 1.00 | 0.00 |
| ATOM | 1558 | N   | ARG | 97 | 5.009 | -5.999 | -7.812 | 1.00 | 0.00 |
| ATOM | 1559 | H   | ARG | 97 | 4.708 | -6.078 | -6.851 | 1.00 | 0.00 |
| ATOM | 1560 | CA  | ARG | 97 | 4.247 | -6.682 | -8.824 | 1.00 | 0.00 |



|      |      |      |     |    |        |         |         |      |      |
|------|------|------|-----|----|--------|---------|---------|------|------|
| ATOM | 1561 | HA   | ARG | 97 | 4.839  | -7.463  | -9.302  | 1.00 | 0.00 |
| ATOM | 1562 | CB   | ARG | 97 | 3.048  | -7.329  | -8.143  | 1.00 | 0.00 |
| ATOM | 1563 | HB2  | ARG | 97 | 2.589  | -6.613  | -7.462  | 1.00 | 0.00 |
| ATOM | 1564 | HB3  | ARG | 97 | 2.322  | -7.628  | -8.898  | 1.00 | 0.00 |
| ATOM | 1565 | CG   | ARG | 97 | 3.503  | -8.563  | -7.355  | 1.00 | 0.00 |
| ATOM | 1566 | HG2  | ARG | 97 | 4.042  | -9.238  | -8.020  | 1.00 | 0.00 |
| ATOM | 1567 | HG3  | ARG | 97 | 4.162  | -8.251  | -6.544  | 1.00 | 0.00 |
| ATOM | 1568 | CD   | ARG | 97 | 2.286  | -9.286  | -6.773  | 1.00 | 0.00 |
| ATOM | 1569 | HD2  | ARG | 97 | 1.647  | -9.643  | -7.581  | 1.00 | 0.00 |
| ATOM | 1570 | HD3  | ARG | 97 | 2.613  | -10.132 | -6.168  | 1.00 | 0.00 |
| ATOM | 1571 | NE   | ARG | 97 | 1.511  | -8.379  | -5.929  | 1.00 | 0.00 |
| ATOM | 1572 | HE   | ARG | 97 | 1.778  | -8.239  | -4.965  | 1.00 | 0.00 |
| ATOM | 1573 | CZ   | ARG | 97 | 0.450  | -7.723  | -6.397  | 1.00 | 0.00 |
| ATOM | 1574 | NH1  | ARG | 97 | 0.064  | -7.884  | -7.635  | 1.00 | 0.00 |
| ATOM | 1575 | HH11 | ARG | 97 | 0.574  | -8.510  | -8.242  | 1.00 | 0.00 |
| ATOM | 1576 | HH12 | ARG | 97 | -0.741 | -7.382  | -7.979  | 1.00 | 0.00 |
| ATOM | 1577 | NH2  | ARG | 97 | -0.207 | -6.914  | -5.614  | 1.00 | 0.00 |
| ATOM | 1578 | HH21 | ARG | 97 | 0.092  | -6.789  | -4.657  | 1.00 | 0.00 |
| ATOM | 1579 | HH22 | ARG | 97 | -1.011 | -6.416  | -5.967  | 1.00 | 0.00 |
| ATOM | 1580 | C    | ARG | 97 | 3.782  | -5.725  | -9.921  | 1.00 | 0.00 |
| ATOM | 1581 | O    | ARG | 97 | 3.726  | -6.099  | -11.093 | 1.00 | 0.00 |
| ATOM | 1582 | N    | CYX | 98 | 3.459  | -4.490  | -9.538  | 1.00 | 0.00 |

|      |      |      |     |    |       |        |         |      |      |
|------|------|------|-----|----|-------|--------|---------|------|------|
| ATOM | 1583 | H    | CYX | 98 | 3.523 | -4.222 | -8.566  | 1.00 | 0.00 |
| ATOM | 1584 | CA   | CYX | 98 | 3.012 | -3.495 | -10.500 | 1.00 | 0.00 |
| ATOM | 1585 | HA   | CYX | 98 | 2.697 | -3.993 | -11.417 | 1.00 | 0.00 |
| ATOM | 1586 | CB   | CYX | 98 | 1.836 | -2.688 | -9.953  | 1.00 | 0.00 |
| ATOM | 1587 | HB2  | CYX | 98 | 2.202 | -1.751 | -9.533  | 1.00 | 0.00 |
| ATOM | 1588 | HB3  | CYX | 98 | 1.135 | -2.475 | -10.759 | 1.00 | 0.00 |
| ATOM | 1589 | SG   | CYX | 98 | 1.007 | -3.622 | -8.640  | 1.00 | 0.00 |
| ATOM | 1590 | C    | CYX | 98 | 4.132 | -2.536 | -10.814 | 1.00 | 0.00 |
| ATOM | 1591 | O    | CYX | 98 | 4.015 | -1.720 | -11.728 | 1.00 | 0.00 |
| ATOM | 1592 | N    | ASN | 99 | 5.205 | -2.602 | -10.032 | 1.00 | 0.00 |
| ATOM | 1593 | H    | ASN | 99 | 5.254 | -3.233 | -9.244  | 1.00 | 0.00 |
| ATOM | 1594 | CA   | ASN | 99 | 6.300 | -1.685 | -10.243 | 1.00 | 0.00 |
| ATOM | 1595 | HA   | ASN | 99 | 5.919 | -0.671 | -10.123 | 1.00 | 0.00 |
| ATOM | 1596 | CB   | ASN | 99 | 7.457 | -1.880 | -9.294  | 1.00 | 0.00 |
| ATOM | 1597 | HB2  | ASN | 99 | 7.592 | -2.937 | -9.065  | 1.00 | 0.00 |
| ATOM | 1598 | HB3  | ASN | 99 | 8.372 | -1.485 | -9.736  | 1.00 | 0.00 |
| ATOM | 1599 | CG   | ASN | 99 | 7.181 | -1.132 | -7.995  | 1.00 | 0.00 |
| ATOM | 1600 | OD1  | ASN | 99 | 7.477 | -1.629 | -6.909  | 1.00 | 0.00 |
| ATOM | 1601 | ND2  | ASN | 99 | 6.631 | 0.052  | -8.050  | 1.00 | 0.00 |
| ATOM | 1602 | HD21 | ASN | 99 | 6.443 | 0.558  | -7.196  | 1.00 | 0.00 |
| ATOM | 1603 | HD22 | ASN | 99 | 6.397 | 0.455  | -8.945  | 1.00 | 0.00 |
| ATOM | 1604 | C    | ASN | 99 | 6.796 | -1.746 | -11.654 | 1.00 | 0.00 |

|      |      |      |     |     |       |        |         |      |      |
|------|------|------|-----|-----|-------|--------|---------|------|------|
| ATOM | 1605 | O    | ASN | 99  | 6.624 | -2.732 | -12.374 | 1.00 | 0.00 |
| ATOM | 1606 | N    | LEU | 100 | 7.325 | -0.621 | -12.049 | 1.00 | 0.00 |
| ATOM | 1607 | H    | LEU | 100 | 7.427 | 0.138  | -11.390 | 1.00 | 0.00 |
| ATOM | 1608 | CA   | LEU | 100 | 7.772 | -0.416 | -13.401 | 1.00 | 0.00 |
| ATOM | 1609 | HA   | LEU | 100 | 8.100 | -1.346 | -13.865 | 1.00 | 0.00 |
| ATOM | 1610 | CB   | LEU | 100 | 6.562 | 0.119  | -14.176 | 1.00 | 0.00 |
| ATOM | 1611 | HB2  | LEU | 100 | 6.878 | 0.989  | -14.751 | 1.00 | 0.00 |
| ATOM | 1612 | HB3  | LEU | 100 | 6.163 | -0.638 | -14.851 | 1.00 | 0.00 |
| ATOM | 1613 | CG   | LEU | 100 | 5.462 | 0.540  | -13.163 | 1.00 | 0.00 |
| ATOM | 1614 | HG   | LEU | 100 | 5.463 | -0.153 | -12.321 | 1.00 | 0.00 |
| ATOM | 1615 | CD1  | LEU | 100 | 5.737 | 1.956  | -12.657 | 1.00 | 0.00 |
| ATOM | 1616 | HD11 | LEU | 100 | 5.736 | 2.649  | -13.498 | 1.00 | 0.00 |
| ATOM | 1617 | HD12 | LEU | 100 | 4.963 | 2.245  | -11.947 | 1.00 | 0.00 |
| ATOM | 1618 | HD13 | LEU | 100 | 6.709 | 1.984  | -12.164 | 1.00 | 0.00 |
| ATOM | 1619 | CD2  | LEU | 100 | 4.091 | 0.473  | -13.819 | 1.00 | 0.00 |
| ATOM | 1620 | HD21 | LEU | 100 | 3.897 | -0.547 | -14.153 | 1.00 | 0.00 |
| ATOM | 1621 | HD22 | LEU | 100 | 3.329 | 0.770  | -13.099 | 1.00 | 0.00 |
| ATOM | 1622 | HD23 | LEU | 100 | 4.064 | 1.147  | -14.675 | 1.00 | 0.00 |
| ATOM | 1623 | C    | LEU | 100 | 8.921 | 0.587  | -13.431 | 1.00 | 0.00 |
| ATOM | 1624 | O    | LEU | 100 | 8.895 | 1.581  | -12.708 | 1.00 | 0.00 |
| ATOM | 1625 | N    | SER | 101 | 9.925 | 0.306  | -14.265 | 1.00 | 0.00 |
| ATOM | 1626 | H    | SER | 101 | 9.891 | -0.538 | -14.819 | 1.00 | 0.00 |

|      |      |     |     |     |        |        |         |      |      |
|------|------|-----|-----|-----|--------|--------|---------|------|------|
| ATOM | 1627 | CA  | SER | 101 | 11.101 | 1.172  | -14.390 | 1.00 | 0.00 |
| ATOM | 1628 | HA  | SER | 101 | 11.838 | 0.919  | -13.627 | 1.00 | 0.00 |
| ATOM | 1629 | CB  | SER | 101 | 11.738 | 0.980  | -15.768 | 1.00 | 0.00 |
| ATOM | 1630 | HB2 | SER | 101 | 12.025 | -0.064 | -15.895 | 1.00 | 0.00 |
| ATOM | 1631 | HB3 | SER | 101 | 11.023 | 1.257  | -16.542 | 1.00 | 0.00 |
| ATOM | 1632 | OG  | SER | 101 | 12.892 | 1.804  | -15.872 | 1.00 | 0.00 |
| ATOM | 1633 | HG  | SER | 101 | 13.294 | 1.685  | -16.736 | 1.00 | 0.00 |
| ATOM | 1634 | C   | SER | 101 | 10.724 | 2.641  | -14.202 | 1.00 | 0.00 |
| ATOM | 1635 | O   | SER | 101 | 10.275 | 3.305  | -15.137 | 1.00 | 0.00 |
| ATOM | 1636 | N   | PRO | 102 | 10.895 | 3.150  | -13.007 | 1.00 | 0.00 |
| ATOM | 1637 | CD  | PRO | 102 | 11.409 | 2.444  | -11.837 | 1.00 | 0.00 |
| ATOM | 1638 | HD2 | PRO | 102 | 12.484 | 2.602  | -11.743 | 1.00 | 0.00 |
| ATOM | 1639 | HD3 | PRO | 102 | 11.206 | 1.376  | -11.922 | 1.00 | 0.00 |
| ATOM | 1640 | CG  | PRO | 102 | 10.622 | 3.096  | -10.712 | 1.00 | 0.00 |
| ATOM | 1641 | HG2 | PRO | 102 | 11.205 | 3.048  | -9.792  | 1.00 | 0.00 |
| ATOM | 1642 | HG3 | PRO | 102 | 9.682  | 2.561  | -10.574 | 1.00 | 0.00 |
| ATOM | 1643 | CB  | PRO | 102 | 10.374 | 4.518  | -11.132 | 1.00 | 0.00 |
| ATOM | 1644 | HB2 | PRO | 102 | 11.117 | 5.150  | -10.645 | 1.00 | 0.00 |
| ATOM | 1645 | HB3 | PRO | 102 | 9.375  | 4.870  | -10.877 | 1.00 | 0.00 |
| ATOM | 1646 | CA  | PRO | 102 | 10.572 | 4.558  | -12.661 | 1.00 | 0.00 |
| ATOM | 1647 | HA  | PRO | 102 | 9.661  | 4.840  | -13.188 | 1.00 | 0.00 |
| ATOM | 1648 | C   | PRO | 102 | 11.699 | 5.510  | -13.049 | 1.00 | 0.00 |

|      |      |     |     |     |        |       |         |      |      |
|------|------|-----|-----|-----|--------|-------|---------|------|------|
| ATOM | 1649 | O   | PRO | 102 | 12.817 | 5.398 | -12.542 | 1.00 | 0.00 |
| ATOM | 1650 | N   | MET | 103 | 11.403 | 6.442 | -13.951 | 1.00 | 0.00 |
| ATOM | 1651 | H   | MET | 103 | 10.480 | 6.493 | -14.358 | 1.00 | 0.00 |
| ATOM | 1652 | CA  | MET | 103 | 12.408 | 7.399 | -14.395 | 1.00 | 0.00 |
| ATOM | 1653 | HA  | MET | 103 | 13.313 | 6.875 | -14.703 | 1.00 | 0.00 |
| ATOM | 1654 | CB  | MET | 103 | 11.875 | 8.200 | -15.588 | 1.00 | 0.00 |
| ATOM | 1655 | HB2 | MET | 103 | 10.949 | 8.698 | -15.303 | 1.00 | 0.00 |
| ATOM | 1656 | HB3 | MET | 103 | 12.614 | 8.946 | -15.880 | 1.00 | 0.00 |
| ATOM | 1657 | CG  | MET | 103 | 11.606 | 7.258 | -16.767 | 1.00 | 0.00 |
| ATOM | 1658 | HG2 | MET | 103 | 10.819 | 6.553 | -16.499 | 1.00 | 0.00 |
| ATOM | 1659 | HG3 | MET | 103 | 11.293 | 7.838 | -17.634 | 1.00 | 0.00 |
| ATOM | 1660 | SD  | MET | 103 | 13.113 | 6.341 | -17.177 | 1.00 | 0.00 |
| ATOM | 1661 | CE  | MET | 103 | 14.129 | 7.758 | -17.664 | 1.00 | 0.00 |
| ATOM | 1662 | HE1 | MET | 103 | 14.222 | 8.445 | -16.823 | 1.00 | 0.00 |
| ATOM | 1663 | HE2 | MET | 103 | 15.119 | 7.411 | -17.960 | 1.00 | 0.00 |
| ATOM | 1664 | HE3 | MET | 103 | 13.659 | 8.271 | -18.502 | 1.00 | 0.00 |
| ATOM | 1665 | C   | MET | 103 | 12.776 | 8.352 | -13.263 | 1.00 | 0.00 |
| ATOM | 1666 | O   | MET | 103 | 13.942 | 8.444 | -12.874 | 1.00 | 0.00 |
| ATOM | 1667 | N   | ARG | 104 | 11.775 | 9.052 | -12.732 | 1.00 | 0.00 |
| ATOM | 1668 | H   | ARG | 104 | 10.836 | 8.959 | -13.091 | 1.00 | 0.00 |
| ATOM | 1669 | CA  | ARG | 104 | 12.007 | 9.987 | -11.635 | 1.00 | 0.00 |
| ATOM | 1670 | HA  | ARG | 104 | 12.828 | 9.636 | -11.010 | 1.00 | 0.00 |

|      |      |      |     |     |        |        |         |      |      |
|------|------|------|-----|-----|--------|--------|---------|------|------|
| ATOM | 1671 | CB   | ARG | 104 | 12.374 | 11.367 | -12.197 | 1.00 | 0.00 |
| ATOM | 1672 | HB2  | ARG | 104 | 12.074 | 11.419 | -13.243 | 1.00 | 0.00 |
| ATOM | 1673 | HB3  | ARG | 104 | 11.850 | 12.136 | -11.630 | 1.00 | 0.00 |
| ATOM | 1674 | CG   | ARG | 104 | 13.888 | 11.593 | -12.087 | 1.00 | 0.00 |
| ATOM | 1675 | HG2  | ARG | 104 | 14.410 | 10.777 | -12.588 | 1.00 | 0.00 |
| ATOM | 1676 | HG3  | ARG | 104 | 14.146 | 12.537 | -12.566 | 1.00 | 0.00 |
| ATOM | 1677 | CD   | ARG | 104 | 14.307 | 11.638 | -10.612 | 1.00 | 0.00 |
| ATOM | 1678 | HD2  | ARG | 104 | 14.482 | 10.625 | -10.249 | 1.00 | 0.00 |
| ATOM | 1679 | HD3  | ARG | 104 | 15.221 | 12.223 | -10.507 | 1.00 | 0.00 |
| ATOM | 1680 | NE   | ARG | 104 | 13.261 | 12.253 | -9.798  | 1.00 | 0.00 |
| ATOM | 1681 | HE   | ARG | 104 | 12.659 | 11.673 | -9.231  | 1.00 | 0.00 |
| ATOM | 1682 | CZ   | ARG | 104 | 13.073 | 13.571 | -9.781  | 1.00 | 0.00 |
| ATOM | 1683 | NH1  | ARG | 104 | 13.836 | 14.353 | -10.497 | 1.00 | 0.00 |
| ATOM | 1684 | HH11 | ARG | 104 | 14.571 | 13.955 | -11.064 | 1.00 | 0.00 |
| ATOM | 1685 | HH12 | ARG | 104 | 13.688 | 15.352 | -10.479 | 1.00 | 0.00 |
| ATOM | 1686 | NH2  | ARG | 104 | 12.126 | 14.082 | -9.046  | 1.00 | 0.00 |
| ATOM | 1687 | HH21 | ARG | 104 | 11.538 | 13.475 | -8.492  | 1.00 | 0.00 |
| ATOM | 1688 | HH22 | ARG | 104 | 11.985 | 15.082 | -9.034  | 1.00 | 0.00 |
| ATOM | 1689 | C    | ARG | 104 | 10.769 | 10.116 | -10.749 | 1.00 | 0.00 |
| ATOM | 1690 | O    | ARG | 104 | 9.644  | 10.173 | -11.245 | 1.00 | 0.00 |
| ATOM | 1691 | N    | CYX | 105 | 10.994 | 10.193 | -9.438  | 1.00 | 0.00 |
| ATOM | 1692 | H    | CYX | 105 | 11.936 | 10.125 | -9.079  | 1.00 | 0.00 |

|      |      |     |     |     |        |        |         |      |      |
|------|------|-----|-----|-----|--------|--------|---------|------|------|
| ATOM | 1693 | CA  | CYX | 105 | 9.900  | 10.353 | -8.484  | 1.00 | 0.00 |
| ATOM | 1694 | HA  | CYX | 105 | 8.947  | 10.181 | -8.983  | 1.00 | 0.00 |
| ATOM | 1695 | CB  | CYX | 105 | 10.039 | 9.349  | -7.337  | 1.00 | 0.00 |
| ATOM | 1696 | HB2 | CYX | 105 | 11.075 | 9.325  | -6.998  | 1.00 | 0.00 |
| ATOM | 1697 | HB3 | CYX | 105 | 9.394  | 9.648  | -6.511  | 1.00 | 0.00 |
| ATOM | 1698 | SG  | CYX | 105 | 9.580  | 7.695  | -7.917  | 1.00 | 0.00 |
| ATOM | 1699 | C   | CYX | 105 | 9.906  | 11.777 | -7.926  | 1.00 | 0.00 |
| ATOM | 1700 | O   | CYX | 105 | 10.815 | 12.149 | -7.184  | 1.00 | 0.00 |
| ATOM | 1701 | N   | PRO | 106 | 8.923  | 12.577 | -8.268  | 1.00 | 0.00 |
| ATOM | 1702 | CD  | PRO | 106 | 7.805  | 12.230 | -9.157  | 1.00 | 0.00 |
| ATOM | 1703 | HD2 | PRO | 106 | 7.113  | 11.577 | -8.624  | 1.00 | 0.00 |
| ATOM | 1704 | HD3 | PRO | 106 | 8.192  | 11.710 | -10.033 | 1.00 | 0.00 |
| ATOM | 1705 | CG  | PRO | 106 | 7.184  | 13.583 | -9.508  | 1.00 | 0.00 |
| ATOM | 1706 | HG2 | PRO | 106 | 6.105  | 13.464 | -9.604  | 1.00 | 0.00 |
| ATOM | 1707 | HG3 | PRO | 106 | 7.597  | 13.928 | -10.456 | 1.00 | 0.00 |
| ATOM | 1708 | CB  | PRO | 106 | 7.533  | 14.523 | -8.401  | 1.00 | 0.00 |
| ATOM | 1709 | HB2 | PRO | 106 | 6.739  | 14.526 | -7.654  | 1.00 | 0.00 |
| ATOM | 1710 | HB3 | PRO | 106 | 7.688  | 15.537 | -8.770  | 1.00 | 0.00 |
| ATOM | 1711 | CA  | PRO | 106 | 8.826  | 13.990 | -7.783  | 1.00 | 0.00 |
| ATOM | 1712 | HA  | PRO | 106 | 9.698  | 14.526 | -8.157  | 1.00 | 0.00 |
| ATOM | 1713 | C   | PRO | 106 | 8.773  | 14.104 | -6.265  | 1.00 | 0.00 |
| ATOM | 1714 | O   | PRO | 106 | 8.596  | 15.194 | -5.724  | 1.00 | 0.00 |

|      |      |     |     |     |        |        |        |      |      |
|------|------|-----|-----|-----|--------|--------|--------|------|------|
| ATOM | 1715 | N   | MET | 107 | 8.927  | 12.981 | -5.587 | 1.00 | 0.00 |
| ATOM | 1716 | H   | MET | 107 | 9.085  | 12.108 | -6.070 | 1.00 | 0.00 |
| ATOM | 1717 | CA  | MET | 107 | 8.895  | 12.968 | -4.136 | 1.00 | 0.00 |
| ATOM | 1718 | HA  | MET | 107 | 8.068  | 13.574 | -3.766 | 1.00 | 0.00 |
| ATOM | 1719 | CB  | MET | 107 | 8.703  | 11.550 | -3.661 | 1.00 | 0.00 |
| ATOM | 1720 | HB2 | MET | 107 | 9.309  | 10.884 | -4.275 | 1.00 | 0.00 |
| ATOM | 1721 | HB3 | MET | 107 | 9.024  | 11.476 | -2.622 | 1.00 | 0.00 |
| ATOM | 1722 | CG  | MET | 107 | 7.228  | 11.145 | -3.770 | 1.00 | 0.00 |
| ATOM | 1723 | HG2 | MET | 107 | 7.149  | 10.211 | -4.327 | 1.00 | 0.00 |
| ATOM | 1724 | HG3 | MET | 107 | 6.816  | 11.007 | -2.770 | 1.00 | 0.00 |
| ATOM | 1725 | SD  | MET | 107 | 6.287  | 12.434 | -4.631 | 1.00 | 0.00 |
| ATOM | 1726 | CE  | MET | 107 | 6.264  | 11.660 | -6.265 | 1.00 | 0.00 |
| ATOM | 1727 | HE1 | MET | 107 | 5.769  | 10.691 | -6.202 | 1.00 | 0.00 |
| ATOM | 1728 | HE2 | MET | 107 | 5.724  | 12.299 | -6.963 | 1.00 | 0.00 |
| ATOM | 1729 | HE3 | MET | 107 | 7.287  | 11.522 | -6.616 | 1.00 | 0.00 |
| ATOM | 1730 | C   | MET | 107 | 10.202 | 13.490 | -3.585 | 1.00 | 0.00 |
| ATOM | 1731 | O   | MET | 107 | 11.151 | 12.737 | -3.358 | 1.00 | 0.00 |
| ATOM | 1732 | N   | GLY | 108 | 10.236 | 14.786 | -3.378 | 1.00 | 0.00 |
| ATOM | 1733 | H   | GLY | 108 | 9.428  | 15.356 | -3.583 | 1.00 | 0.00 |
| ATOM | 1734 | CA  | GLY | 108 | 11.419 | 15.435 | -2.855 | 1.00 | 0.00 |
| ATOM | 1735 | HA2 | GLY | 108 | 11.155 | 16.431 | -2.501 | 1.00 | 0.00 |
| ATOM | 1736 | HA3 | GLY | 108 | 11.814 | 14.848 | -2.025 | 1.00 | 0.00 |



|      |      |     |     |     |        |        |        |      |      |
|------|------|-----|-----|-----|--------|--------|--------|------|------|
| ATOM | 1737 | C   | GLY | 108 | 12.493 | 15.559 | -3.930 | 1.00 | 0.00 |
| ATOM | 1738 | O   | GLY | 108 | 13.685 | 15.615 | -3.626 | 1.00 | 0.00 |
| ATOM | 1739 | N   | GLY | 109 | 12.056 | 15.608 | -5.187 | 1.00 | 0.00 |
| ATOM | 1740 | H   | GLY | 109 | 11.067 | 15.557 | -5.384 | 1.00 | 0.00 |
| ATOM | 1741 | CA  | GLY | 109 | 12.981 | 15.735 | -6.310 | 1.00 | 0.00 |
| ATOM | 1742 | HA2 | GLY | 109 | 12.426 | 15.626 | -7.241 | 1.00 | 0.00 |
| ATOM | 1743 | HA3 | GLY | 109 | 13.447 | 16.720 | -6.277 | 1.00 | 0.00 |
| ATOM | 1744 | C   | GLY | 109 | 14.072 | 14.668 | -6.255 | 1.00 | 0.00 |
| ATOM | 1745 | O   | GLY | 109 | 15.243 | 14.980 | -6.034 | 1.00 | 0.00 |
| ATOM | 1746 | N   | SER | 110 | 13.681 | 13.410 | -6.459 | 1.00 | 0.00 |
| ATOM | 1747 | H   | SER | 110 | 12.707 | 13.195 | -6.615 | 1.00 | 0.00 |
| ATOM | 1748 | CA  | SER | 110 | 14.639 | 12.305 | -6.432 | 1.00 | 0.00 |
| ATOM | 1749 | HA  | SER | 110 | 15.069 | 12.208 | -5.435 | 1.00 | 0.00 |
| ATOM | 1750 | CB  | SER | 110 | 13.939 | 10.995 | -6.791 | 1.00 | 0.00 |
| ATOM | 1751 | HB2 | SER | 110 | 13.575 | 11.045 | -7.817 | 1.00 | 0.00 |
| ATOM | 1752 | HB3 | SER | 110 | 14.642 | 10.167 | -6.695 | 1.00 | 0.00 |
| ATOM | 1753 | OG  | SER | 110 | 12.843 | 10.790 | -5.908 | 1.00 | 0.00 |
| ATOM | 1754 | HG  | SER | 110 | 12.402 | 9.967  | -6.131 | 1.00 | 0.00 |
| ATOM | 1755 | C   | SER | 110 | 15.782 | 12.566 | -7.411 | 1.00 | 0.00 |
| ATOM | 1756 | O   | SER | 110 | 15.625 | 13.317 | -8.374 | 1.00 | 0.00 |
| ATOM | 1757 | N   | ILE | 111 | 16.933 | 11.949 | -7.156 | 1.00 | 0.00 |
| ATOM | 1758 | H   | ILE | 111 | 17.031 | 11.360 | -6.341 | 1.00 | 0.00 |

|      |      |      |     |     |        |        |         |      |      |
|------|------|------|-----|-----|--------|--------|---------|------|------|
| ATOM | 1759 | CA   | ILE | 111 | 18.096 | 12.133 | -8.021  | 1.00 | 0.00 |
| ATOM | 1760 | HA   | ILE | 111 | 18.006 | 13.082 | -8.549  | 1.00 | 0.00 |
| ATOM | 1761 | CB   | ILE | 111 | 19.378 | 12.137 | -7.180  | 1.00 | 0.00 |
| ATOM | 1762 | HB   | ILE | 111 | 19.474 | 11.183 | -6.660  | 1.00 | 0.00 |
| ATOM | 1763 | CG2  | ILE | 111 | 20.592 | 12.345 | -8.093  | 1.00 | 0.00 |
| ATOM | 1764 | HG21 | ILE | 111 | 20.498 | 13.298 | -8.612  | 1.00 | 0.00 |
| ATOM | 1765 | HG22 | ILE | 111 | 21.502 | 12.347 | -7.493  | 1.00 | 0.00 |
| ATOM | 1766 | HG23 | ILE | 111 | 20.641 | 11.537 | -8.823  | 1.00 | 0.00 |
| ATOM | 1767 | CG1  | ILE | 111 | 19.309 | 13.275 | -6.153  | 1.00 | 0.00 |
| ATOM | 1768 | HG12 | ILE | 111 | 19.338 | 14.233 | -6.672  | 1.00 | 0.00 |
| ATOM | 1769 | HG13 | ILE | 111 | 18.380 | 13.196 | -5.588  | 1.00 | 0.00 |
| ATOM | 1770 | CD1  | ILE | 111 | 20.499 | 13.178 | -5.194  | 1.00 | 0.00 |
| ATOM | 1771 | HD11 | ILE | 111 | 21.429 | 13.256 | -5.758  | 1.00 | 0.00 |
| ATOM | 1772 | HD12 | ILE | 111 | 20.447 | 13.987 | -4.466  | 1.00 | 0.00 |
| ATOM | 1773 | HD13 | ILE | 111 | 20.471 | 12.220 | -4.674  | 1.00 | 0.00 |
| ATOM | 1774 | C    | ILE | 111 | 18.165 | 11.028 | -9.073  | 1.00 | 0.00 |
| ATOM | 1775 | O    | ILE | 111 | 17.773 | 11.228 | -10.224 | 1.00 | 0.00 |
| ATOM | 1776 | N    | ALA | 112 | 18.640 | 9.855  | -8.659  | 1.00 | 0.00 |
| ATOM | 1777 | H    | ALA | 112 | 18.941 | 9.743  | -7.701  | 1.00 | 0.00 |
| ATOM | 1778 | CA   | ALA | 112 | 18.731 | 8.711  | -9.547  | 1.00 | 0.00 |
| ATOM | 1779 | HA   | ALA | 112 | 19.220 | 8.957  | -10.489 | 1.00 | 0.00 |
| ATOM | 1780 | CB   | ALA | 112 | 19.508 | 7.583  | -8.875  | 1.00 | 0.00 |

|      |      |     |     |     |        |       |         |      |      |
|------|------|-----|-----|-----|--------|-------|---------|------|------|
| ATOM | 1781 | HB1 | ALA | 112 | 19.025 | 7.319 | -7.934  | 1.00 | 0.00 |
| ATOM | 1782 | HB2 | ALA | 112 | 19.526 | 6.712 | -9.530  | 1.00 | 0.00 |
| ATOM | 1783 | HB3 | ALA | 112 | 20.529 | 7.910 | -8.679  | 1.00 | 0.00 |
| ATOM | 1784 | C   | ALA | 112 | 17.340 | 8.235 | -9.856  | 1.00 | 0.00 |
| ATOM | 1785 | O   | ALA | 112 | 16.364 | 8.913 | -9.530  | 1.00 | 0.00 |
| ATOM | 1786 | N   | GLY | 113 | 17.226 | 7.051 | -10.429 | 1.00 | 0.00 |
| ATOM | 1787 | H   | GLY | 113 | 18.015 | 6.482 | -10.702 | 1.00 | 0.00 |
| ATOM | 1788 | CA  | GLY | 113 | 15.907 | 6.547 | -10.675 | 1.00 | 0.00 |
| ATOM | 1789 | HA2 | GLY | 113 | 15.253 | 7.332 | -11.052 | 1.00 | 0.00 |
| ATOM | 1790 | HA3 | GLY | 113 | 15.931 | 5.721 | -11.386 | 1.00 | 0.00 |
| ATOM | 1791 | C   | GLY | 113 | 15.362 | 6.044 | -9.354  | 1.00 | 0.00 |
| ATOM | 1792 | O   | GLY | 113 | 15.651 | 4.925 | -8.928  | 1.00 | 0.00 |
| ATOM | 1793 | N   | PHE | 114 | 14.602 | 6.911 | -8.702  | 1.00 | 0.00 |
| ATOM | 1794 | H   | PHE | 114 | 14.427 | 7.820 | -9.105  | 1.00 | 0.00 |
| ATOM | 1795 | CA  | PHE | 114 | 14.025 | 6.611 | -7.396  | 1.00 | 0.00 |
| ATOM | 1796 | HA  | PHE | 114 | 14.772 | 6.749 | -6.614  | 1.00 | 0.00 |
| ATOM | 1797 | CB  | PHE | 114 | 12.850 | 7.552 | -7.121  | 1.00 | 0.00 |
| ATOM | 1798 | HB2 | PHE | 114 | 13.138 | 8.601 | -7.191  | 1.00 | 0.00 |
| ATOM | 1799 | HB3 | PHE | 114 | 12.009 | 7.361 | -7.787  | 1.00 | 0.00 |
| ATOM | 1800 | CG  | PHE | 114 | 12.344 | 7.336 | -5.712  | 1.00 | 0.00 |
| ATOM | 1801 | CD1 | PHE | 114 | 12.952 | 8.004 | -4.641  | 1.00 | 0.00 |
| ATOM | 1802 | HD1 | PHE | 114 | 13.790 | 8.677 | -4.822  | 1.00 | 0.00 |

|      |      |         |     |        |         |        |      |      |
|------|------|---------|-----|--------|---------|--------|------|------|
| ATOM | 1803 | CE1 PHE | 114 | 12.483 | 7.806   | -3.337 | 1.00 | 0.00 |
| ATOM | 1804 | HE1 PHE | 114 | 12.956 | 8.326   | -2.504 | 1.00 | 0.00 |
| ATOM | 1805 | CZ PHE  | 114 | 11.409 | 6.941   | -3.102 | 1.00 | 0.00 |
| ATOM | 1806 | HZ PHE  | 114 | 11.046 | 6.787   | -2.086 | 1.00 | 0.00 |
| ATOM | 1807 | CE2 PHE | 114 | 10.801 | 6.273   | -4.172 | 1.00 | 0.00 |
| ATOM | 1808 | HE2 PHE | 114 | 9.965  | 5.599   | -3.989 | 1.00 | 0.00 |
| ATOM | 1809 | CD2 PHE | 114 | 11.268 | 6.471   | -5.477 | 1.00 | 0.00 |
| ATOM | 1810 | HD2 PHE | 114 | 10.794 | 5.952   | -6.310 | 1.00 | 0.00 |
| ATOM | 1811 | C PHE   | 114 | 13.545 | 5.160   | -7.323 | 1.00 | 0.00 |
| ATOM | 1812 | O PHE   | 114 | 13.946 | 4.471   | -6.400 | 1.00 | 0.00 |
| ATOM | 1813 | OXT PHE | 114 | 12.783 | 4.762   | -8.190 | 1.00 | 0.00 |
| TER  |      |         |     |        |         |        |      |      |
| ATOM | 1814 | CI1 LIG | 115 | 19.563 | -14.861 | -5.275 | 1.00 | 0.00 |
| ATOM | 1815 | CI2 LIG | 115 | 20.572 | -17.559 | -5.900 | 1.00 | 0.00 |
| ATOM | 1816 | P1 LIG  | 115 | 18.426 | -18.906 | -2.054 | 1.00 | 0.00 |
| ATOM | 1817 | O1 LIG  | 115 | 17.946 | -20.373 | -2.456 | 1.00 | 0.00 |
| ATOM | 1818 | O2 LIG  | 115 | 19.741 | -19.198 | -1.220 | 1.00 | 0.00 |
| ATOM | 1819 | O3 LIG  | 115 | 18.955 | -18.356 | -3.514 | 1.00 | 0.00 |
| ATOM | 1820 | O4 LIG  | 115 | 17.473 | -17.994 | -1.407 | 1.00 | 0.00 |
| ATOM | 1821 | C1 LIG  | 115 | 16.751 | -20.588 | -3.242 | 1.00 | 0.00 |
| ATOM | 1822 | H1 LIG  | 115 | 16.588 | -21.663 | -3.249 | 1.00 | 0.00 |
| ATOM | 1823 | H2 LIG  | 115 | 16.905 | -20.227 | -4.260 | 1.00 | 0.00 |

|      |      |     |     |     |         |         |        |      |      |
|------|------|-----|-----|-----|---------|---------|--------|------|------|
| ATOM | 1824 | H3  | LIG | 115 | 15.901  | -20.083 | -2.782 | 1.00 | 0.00 |
| ATOM | 1825 | C2  | LIG | 115 | 20.803  | -20.069 | -1.676 | 1.00 | 0.00 |
| ATOM | 1826 | H4  | LIG | 115 | 21.183  | -19.729 | -2.640 | 1.00 | 0.00 |
| ATOM | 1827 | H5  | LIG | 115 | 20.435  | -21.093 | -1.753 | 1.00 | 0.00 |
| ATOM | 1828 | H6  | LIG | 115 | 21.582  | -20.002 | -0.921 | 1.00 | 0.00 |
| ATOM | 1829 | C3  | LIG | 115 | 18.941  | -17.019 | -3.815 | 1.00 | 0.00 |
| ATOM | 1830 | H7  | LIG | 115 | 18.346  | -16.377 | -3.178 | 1.00 | 0.00 |
| ATOM | 1831 | C4  | LIG | 115 | 19.614  | -16.550 | -4.864 | 1.00 | 0.00 |
| TER  |      |     |     |     |         |         |        |      |      |
| ATOM | 1832 | Cl1 | LIG | 116 | -18.105 | 16.421  | 2.805  | 1.00 | 0.00 |
| ATOM | 1833 | Cl2 | LIG | 116 | -17.645 | 17.084  | 5.640  | 1.00 | 0.00 |
| ATOM | 1834 | P1  | LIG | 116 | -19.445 | 21.204  | 4.639  | 1.00 | 0.00 |
| ATOM | 1835 | O1  | LIG | 116 | -20.209 | 21.554  | 5.995  | 1.00 | 0.00 |
| ATOM | 1836 | O2  | LIG | 116 | -18.095 | 22.020  | 4.791  | 1.00 | 0.00 |
| ATOM | 1837 | O3  | LIG | 116 | -19.035 | 19.635  | 4.926  | 1.00 | 0.00 |
| ATOM | 1838 | O4  | LIG | 116 | -20.140 | 21.392  | 3.357  | 1.00 | 0.00 |
| ATOM | 1839 | C1  | LIG | 116 | -21.518 | 21.012  | 6.286  | 1.00 | 0.00 |
| ATOM | 1840 | H1  | LIG | 116 | -21.854 | 21.515  | 7.190  | 1.00 | 0.00 |
| ATOM | 1841 | H2  | LIG | 116 | -21.445 | 19.938  | 6.461  | 1.00 | 0.00 |
| ATOM | 1842 | H3  | LIG | 116 | -22.204 | 21.221  | 5.464  | 1.00 | 0.00 |
| ATOM | 1843 | C2  | LIG | 116 | -17.262 | 21.977  | 5.973  | 1.00 | 0.00 |
| ATOM | 1844 | H4  | LIG | 116 | -16.965 | 20.950  | 6.190  | 1.00 | 0.00 |

|      |      |     |     |     |         |         |         |      |      |
|------|------|-----|-----|-----|---------|---------|---------|------|------|
| ATOM | 1845 | H5  | LIG | 116 | -17.799 | 22.404  | 6.821   | 1.00 | 0.00 |
| ATOM | 1846 | H6  | LIG | 116 | -16.388 | 22.579  | 5.738   | 1.00 | 0.00 |
| ATOM | 1847 | C3  | LIG | 116 | -18.870 | 18.745  | 3.896   | 1.00 | 0.00 |
| ATOM | 1848 | H7  | LIG | 116 | -19.260 | 19.034  | 2.929   | 1.00 | 0.00 |
| ATOM | 1849 | C4  | LIG | 116 | -18.276 | 17.571  | 4.100   | 1.00 | 0.00 |
| TER  |      |     |     |     |         |         |         |      |      |
| ATOM | 1850 | Cl1 | LIG | 117 | -6.782  | -10.137 | -19.452 | 1.00 | 0.00 |
| ATOM | 1851 | Cl2 | LIG | 117 | -4.261  | -9.069  | -18.359 | 1.00 | 0.00 |
| ATOM | 1852 | P1  | LIG | 117 | -6.020  | -10.039 | -14.213 | 1.00 | 0.00 |
| ATOM | 1853 | O1  | LIG | 117 | -4.712  | -10.465 | -13.406 | 1.00 | 0.00 |
| ATOM | 1854 | O2  | LIG | 117 | -6.222  | -8.534  | -13.759 | 1.00 | 0.00 |
| ATOM | 1855 | O3  | LIG | 117 | -5.410  | -9.950  | -15.741 | 1.00 | 0.00 |
| ATOM | 1856 | O4  | LIG | 117 | -7.222  | -10.879 | -14.123 | 1.00 | 0.00 |
| ATOM | 1857 | C1  | LIG | 117 | -4.153  | -11.794 | -13.521 | 1.00 | 0.00 |
| ATOM | 1858 | H1  | LIG | 117 | -3.366  | -11.851 | -12.773 | 1.00 | 0.00 |
| ATOM | 1859 | H2  | LIG | 117 | -3.733  | -11.936 | -14.517 | 1.00 | 0.00 |
| ATOM | 1860 | H3  | LIG | 117 | -4.918  | -12.544 | -13.317 | 1.00 | 0.00 |
| ATOM | 1861 | C2  | LIG | 117 | -5.166  | -7.545  | -13.770 | 1.00 | 0.00 |
| ATOM | 1862 | H4  | LIG | 117 | -4.743  | -7.454  | -14.771 | 1.00 | 0.00 |
| ATOM | 1863 | H5  | LIG | 117 | -4.391  | -7.822  | -13.054 | 1.00 | 0.00 |
| ATOM | 1864 | H6  | LIG | 117 | -5.636  | -6.610  | -13.475 | 1.00 | 0.00 |
| ATOM | 1865 | C3  | LIG | 117 | -6.206  | -10.164 | -16.836 | 1.00 | 0.00 |

|      |      |     |     |     |        |         |         |      |      |
|------|------|-----|-----|-----|--------|---------|---------|------|------|
| ATOM | 1866 | H7  | LIG | 117 | -7.164 | -10.637 | -16.663 | 1.00 | 0.00 |
| ATOM | 1867 | C4  | LIG | 117 | -5.792 | -9.825  | -18.055 | 1.00 | 0.00 |
| TER  |      |     |     |     |        |         |         |      |      |
| ATOM | 1868 | Cl1 | LIG | 118 | 14.088 | 23.776  | -0.253  | 1.00 | 0.00 |
| ATOM | 1869 | Cl2 | LIG | 118 | 16.618 | 23.709  | 1.258   | 1.00 | 0.00 |
| ATOM | 1870 | P1  | LIG | 118 | 16.041 | 28.246  | 1.805   | 1.00 | 0.00 |
| ATOM | 1871 | O1  | LIG | 118 | 16.649 | 28.469  | 3.263   | 1.00 | 0.00 |
| ATOM | 1872 | O2  | LIG | 118 | 17.242 | 28.683  | 0.868   | 1.00 | 0.00 |
| ATOM | 1873 | O3  | LIG | 118 | 16.022 | 26.600  | 1.740   | 1.00 | 0.00 |
| ATOM | 1874 | O4  | LIG | 118 | 14.744 | 28.850  | 1.470   | 1.00 | 0.00 |
| ATOM | 1875 | C1  | LIG | 118 | 15.877 | 28.190  | 4.453   | 1.00 | 0.00 |
| ATOM | 1876 | H1  | LIG | 118 | 16.472 | 28.556  | 5.287   | 1.00 | 0.00 |
| ATOM | 1877 | H2  | LIG | 118 | 15.718 | 27.115  | 4.551   | 1.00 | 0.00 |
| ATOM | 1878 | H3  | LIG | 118 | 14.922 | 28.716  | 4.416   | 1.00 | 0.00 |
| ATOM | 1879 | C2  | LIG | 118 | 18.599 | 28.206  | 1.029   | 1.00 | 0.00 |
| ATOM | 1880 | H4  | LIG | 118 | 18.624 | 27.116  | 0.983   | 1.00 | 0.00 |
| ATOM | 1881 | H5  | LIG | 118 | 19.005 | 28.556  | 1.978   | 1.00 | 0.00 |
| ATOM | 1882 | H6  | LIG | 118 | 19.159 | 28.629  | 0.198   | 1.00 | 0.00 |
| ATOM | 1883 | C3  | LIG | 118 | 15.110 | 25.932  | 0.964   | 1.00 | 0.00 |
| ATOM | 1884 | H7  | LIG | 118 | 14.260 | 26.498  | 0.606   | 1.00 | 0.00 |
| ATOM | 1885 | C4  | LIG | 118 | 15.266 | 24.637  | 0.694   | 1.00 | 0.00 |
| TER  |      |     |     |     |        |         |         |      |      |

|      |      |     |     |     |         |         |         |      |      |
|------|------|-----|-----|-----|---------|---------|---------|------|------|
| ATOM | 1886 | Cl1 | LIG | 119 | 21.170  | -11.366 | 21.605  | 1.00 | 0.00 |
| ATOM | 1887 | Cl2 | LIG | 119 | 19.775  | -8.861  | 20.923  | 1.00 | 0.00 |
| ATOM | 1888 | P1  | LIG | 119 | 23.970  | -7.075  | 20.272  | 1.00 | 0.00 |
| ATOM | 1889 | O1  | LIG | 119 | 23.701  | -6.066  | 19.066  | 1.00 | 0.00 |
| ATOM | 1890 | O2  | LIG | 119 | 23.940  | -6.112  | 21.530  | 1.00 | 0.00 |
| ATOM | 1891 | O3  | LIG | 119 | 22.533  | -7.879  | 20.312  | 1.00 | 0.00 |
| ATOM | 1892 | O4  | LIG | 119 | 25.131  | -7.973  | 20.208  | 1.00 | 0.00 |
| ATOM | 1893 | C1  | LIG | 119 | 23.644  | -6.525  | 17.696  | 1.00 | 0.00 |
| ATOM | 1894 | H1  | LIG | 119 | 23.590  | -5.628  | 17.083  | 1.00 | 0.00 |
| ATOM | 1895 | H2  | LIG | 119 | 22.753  | -7.136  | 17.545  | 1.00 | 0.00 |
| ATOM | 1896 | H3  | LIG | 119 | 24.543  | -7.092  | 17.450  | 1.00 | 0.00 |
| ATOM | 1897 | C2  | LIG | 119 | 22.888  | -5.150  | 21.779  | 1.00 | 0.00 |
| ATOM | 1898 | H4  | LIG | 119 | 21.920  | -5.651  | 21.820  | 1.00 | 0.00 |
| ATOM | 1899 | H5  | LIG | 119 | 22.889  | -4.388  | 20.999  | 1.00 | 0.00 |
| ATOM | 1900 | H6  | LIG | 119 | 23.120  | -4.705  | 22.744  | 1.00 | 0.00 |
| ATOM | 1901 | C3  | LIG | 119 | 22.454  | -9.168  | 20.772  | 1.00 | 0.00 |
| ATOM | 1902 | H7  | LIG | 119 | 23.384  | -9.715  | 20.864  | 1.00 | 0.00 |
| ATOM | 1903 | C4  | LIG | 119 | 21.277  | -9.716  | 21.064  | 1.00 | 0.00 |
| TER  |      |     |     |     |         |         |         |      |      |
| ATOM | 1904 | Cl1 | LIG | 120 | -24.886 | 18.693  | -23.580 | 1.00 | 0.00 |
| ATOM | 1905 | Cl2 | LIG | 120 | -23.261 | 16.772  | -22.045 | 1.00 | 0.00 |
| ATOM | 1906 | P1  | LIG | 120 | -20.400 | 20.298  | -21.271 | 1.00 | 0.00 |



|      |      |     |     |     |         |        |         |      |      |
|------|------|-----|-----|-----|---------|--------|---------|------|------|
| ATOM | 1907 | O1  | LIG | 120 | -19.887 | 19.972 | -19.796 | 1.00 | 0.00 |
| ATOM | 1908 | O2  | LIG | 120 | -19.213 | 19.753 | -22.169 | 1.00 | 0.00 |
| ATOM | 1909 | O3  | LIG | 120 | -21.602 | 19.181 | -21.420 | 1.00 | 0.00 |
| ATOM | 1910 | O4  | LIG | 120 | -20.840 | 21.663 | -21.590 | 1.00 | 0.00 |
| ATOM | 1911 | C1  | LIG | 120 | -20.675 | 20.308 | -18.631 | 1.00 | 0.00 |
| ATOM | 1912 | H1  | LIG | 120 | -20.038 | 20.106 | -17.772 | 1.00 | 0.00 |
| ATOM | 1913 | H2  | LIG | 120 | -21.567 | 19.680 | -18.591 | 1.00 | 0.00 |
| ATOM | 1914 | H3  | LIG | 120 | -20.950 | 21.363 | -18.653 | 1.00 | 0.00 |
| ATOM | 1915 | C2  | LIG | 120 | -18.632 | 18.437 | -22.017 | 1.00 | 0.00 |
| ATOM | 1916 | H4  | LIG | 120 | -19.401 | 17.670 | -22.118 | 1.00 | 0.00 |
| ATOM | 1917 | H5  | LIG | 120 | -18.142 | 18.358 | -21.046 | 1.00 | 0.00 |
| ATOM | 1918 | H6  | LIG | 120 | -17.902 | 18.344 | -22.817 | 1.00 | 0.00 |
| ATOM | 1919 | C3  | LIG | 120 | -22.677 | 19.403 | -22.241 | 1.00 | 0.00 |
| ATOM | 1920 | H7  | LIG | 120 | -22.837 | 20.419 | -22.580 | 1.00 | 0.00 |
| ATOM | 1921 | C4  | LIG | 120 | -23.495 | 18.406 | -22.576 | 1.00 | 0.00 |
| TER  |      |     |     |     |         |        |         |      |      |
| ATOM | 1922 | CI1 | LIG | 121 | -5.603  | 2.492  | -20.115 | 1.00 | 0.00 |
| ATOM | 1923 | CI2 | LIG | 121 | -6.333  | 4.451  | -22.193 | 1.00 | 0.00 |
| ATOM | 1924 | P1  | LIG | 121 | -3.933  | 7.500  | -19.712 | 1.00 | 0.00 |
| ATOM | 1925 | O1  | LIG | 121 | -3.309  | 8.420  | -20.856 | 1.00 | 0.00 |
| ATOM | 1926 | O2  | LIG | 121 | -5.182  | 8.352  | -19.237 | 1.00 | 0.00 |
| ATOM | 1927 | O3  | LIG | 121 | -4.564  | 6.281  | -20.622 | 1.00 | 0.00 |

|      |      |    |     |     |        |       |         |      |      |
|------|------|----|-----|-----|--------|-------|---------|------|------|
| ATOM | 1928 | O4 | LIG | 121 | -3.065 | 7.019 | -18.628 | 1.00 | 0.00 |
| ATOM | 1929 | C1 | LIG | 121 | -2.124 | 8.022 | -21.582 | 1.00 | 0.00 |
| ATOM | 1930 | H1 | LIG | 121 | -1.845 | 8.879 | -22.191 | 1.00 | 0.00 |
| ATOM | 1931 | H2 | LIG | 121 | -2.348 | 7.167 | -22.222 | 1.00 | 0.00 |
| ATOM | 1932 | H3 | LIG | 121 | -1.319 | 7.779 | -20.887 | 1.00 | 0.00 |
| ATOM | 1933 | C2 | LIG | 121 | -6.156 | 8.919 | -20.144 | 1.00 | 0.00 |
| ATOM | 1934 | H4 | LIG | 121 | -6.602 | 8.136 | -20.759 | 1.00 | 0.00 |
| ATOM | 1935 | H5 | LIG | 121 | -5.683 | 9.674 | -20.773 | 1.00 | 0.00 |
| ATOM | 1936 | H6 | LIG | 121 | -6.914 | 9.376 | -19.512 | 1.00 | 0.00 |
| ATOM | 1937 | C3 | LIG | 121 | -4.705 | 5.016 | -20.112 | 1.00 | 0.00 |
| ATOM | 1938 | H7 | LIG | 121 | -4.163 | 4.788 | -19.203 | 1.00 | 0.00 |
| ATOM | 1939 | C4 | LIG | 121 | -5.458 | 4.111 | -20.735 | 1.00 | 0.00 |

TER

|      |      |     |     |     |         |         |         |      |      |
|------|------|-----|-----|-----|---------|---------|---------|------|------|
| ATOM | 1940 | Cl1 | LIG | 122 | -16.032 | -26.748 | -21.053 | 1.00 | 0.00 |
| ATOM | 1941 | Cl2 | LIG | 122 | -16.149 | -28.538 | -18.714 | 1.00 | 0.00 |
| ATOM | 1942 | P1  | LIG | 122 | -14.699 | -24.914 | -16.268 | 1.00 | 0.00 |
| ATOM | 1943 | O1  | LIG | 122 | -15.463 | -25.139 | -14.886 | 1.00 | 0.00 |
| ATOM | 1944 | O2  | LIG | 122 | -13.256 | -25.489 | -15.954 | 1.00 | 0.00 |
| ATOM | 1945 | O3  | LIG | 122 | -15.427 | -26.062 | -17.199 | 1.00 | 0.00 |
| ATOM | 1946 | O4  | LIG | 122 | -14.713 | -23.580 | -16.884 | 1.00 | 0.00 |
| ATOM | 1947 | C1  | LIG | 122 | -16.844 | -24.749 | -14.714 | 1.00 | 0.00 |
| ATOM | 1948 | H1  | LIG | 122 | -17.064 | -24.885 | -13.657 | 1.00 | 0.00 |

|      |      |     |     |     |         |         |         |      |      |
|------|------|-----|-----|-----|---------|---------|---------|------|------|
| ATOM | 1949 | H2  | LIG | 122 | -17.490 | -25.391 | -15.316 | 1.00 | 0.00 |
| ATOM | 1950 | H3  | LIG | 122 | -16.979 | -23.703 | -14.992 | 1.00 | 0.00 |
| ATOM | 1951 | C2  | LIG | 122 | -13.023 | -26.781 | -15.347 | 1.00 | 0.00 |
| ATOM | 1952 | H4  | LIG | 122 | -13.485 | -27.568 | -15.943 | 1.00 | 0.00 |
| ATOM | 1953 | H5  | LIG | 122 | -13.419 | -26.791 | -14.331 | 1.00 | 0.00 |
| ATOM | 1954 | H6  | LIG | 122 | -11.943 | -26.908 | -15.332 | 1.00 | 0.00 |
| ATOM | 1955 | C3  | LIG | 122 | -15.529 | -25.913 | -18.558 | 1.00 | 0.00 |
| ATOM | 1956 | H7  | LIG | 122 | -15.352 | -24.923 | -18.959 | 1.00 | 0.00 |
| ATOM | 1957 | C4  | LIG | 122 | -15.858 | -26.944 | -19.333 | 1.00 | 0.00 |
| TER  |      |     |     |     |         |         |         |      |      |
| ATOM | 1958 | Cl1 | LIG | 123 | -6.139  | 19.241  | 23.395  | 1.00 | 0.00 |
| ATOM | 1959 | Cl2 | LIG | 123 | -7.658  | 19.156  | 20.871  | 1.00 | 0.00 |
| ATOM | 1960 | P1  | LIG | 123 | -3.626  | 19.948  | 18.789  | 1.00 | 0.00 |
| ATOM | 1961 | O1  | LIG | 123 | -3.793  | 19.109  | 17.443  | 1.00 | 0.00 |
| ATOM | 1962 | O2  | LIG | 123 | -3.968  | 21.421  | 18.313  | 1.00 | 0.00 |
| ATOM | 1963 | O3  | LIG | 123 | -4.956  | 19.444  | 19.621  | 1.00 | 0.00 |
| ATOM | 1964 | O4  | LIG | 123 | -2.382  | 19.821  | 19.561  | 1.00 | 0.00 |
| ATOM | 1965 | C1  | LIG | 123 | -3.571  | 17.680  | 17.412  | 1.00 | 0.00 |
| ATOM | 1966 | H1  | LIG | 123 | -3.617  | 17.395  | 16.363  | 1.00 | 0.00 |
| ATOM | 1967 | H2  | LIG | 123 | -4.355  | 17.169  | 17.973  | 1.00 | 0.00 |
| ATOM | 1968 | H3  | LIG | 123 | -2.589  | 17.442  | 17.822  | 1.00 | 0.00 |
| ATOM | 1969 | C2  | LIG | 123 | -5.143  | 21.761  | 17.540  | 1.00 | 0.00 |

|      |      |     |     |     |         |        |        |      |      |
|------|------|-----|-----|-----|---------|--------|--------|------|------|
| ATOM | 1970 | H4  | LIG | 123 | -6.046  | 21.447 | 18.067 | 1.00 | 0.00 |
| ATOM | 1971 | H5  | LIG | 123 | -5.091  | 21.287 | 16.559 | 1.00 | 0.00 |
| ATOM | 1972 | H6  | LIG | 123 | -5.125  | 22.843 | 17.439 | 1.00 | 0.00 |
| ATOM | 1973 | C3  | LIG | 123 | -4.973  | 19.435 | 20.991 | 1.00 | 0.00 |
| ATOM | 1974 | H7  | LIG | 123 | -4.019  | 19.522 | 21.496 | 1.00 | 0.00 |
| ATOM | 1975 | C4  | LIG | 123 | -6.118  | 19.299 | 21.657 | 1.00 | 0.00 |
| TER  |      |     |     |     |         |        |        |      |      |
| ATOM | 1976 | Cl1 | LIG | 124 | -17.741 | -3.026 | -4.047 | 1.00 | 0.00 |
| ATOM | 1977 | Cl2 | LIG | 124 | -18.163 | -4.636 | -1.615 | 1.00 | 0.00 |
| ATOM | 1978 | P1  | LIG | 124 | -18.473 | -0.614 | 0.609  | 1.00 | 0.00 |
| ATOM | 1979 | O1  | LIG | 124 | -19.559 | -0.953 | 1.728  | 1.00 | 0.00 |
| ATOM | 1980 | O2  | LIG | 124 | -17.111 | -0.757 | 1.407  | 1.00 | 0.00 |
| ATOM | 1981 | O3  | LIG | 124 | -18.572 | -1.970 | -0.321 | 1.00 | 0.00 |
| ATOM | 1982 | O4  | LIG | 124 | -18.609 | 0.627  | -0.167 | 1.00 | 0.00 |
| ATOM | 1983 | C1  | LIG | 124 | -20.975 | -0.942 | 1.433  | 1.00 | 0.00 |
| ATOM | 1984 | H1  | LIG | 124 | -21.478 | -1.068 | 2.389  | 1.00 | 0.00 |
| ATOM | 1985 | H2  | LIG | 124 | -21.223 | -1.769 | 0.767  | 1.00 | 0.00 |
| ATOM | 1986 | H3  | LIG | 124 | -21.259 | 0.010  | 0.983  | 1.00 | 0.00 |
| ATOM | 1987 | C2  | LIG | 124 | -16.781 | -1.898 | 2.232  | 1.00 | 0.00 |
| ATOM | 1988 | H4  | LIG | 124 | -16.829 | -2.816 | 1.644  | 1.00 | 0.00 |
| ATOM | 1989 | H5  | LIG | 124 | -17.465 | -1.954 | 3.079  | 1.00 | 0.00 |
| ATOM | 1990 | H6  | LIG | 124 | -15.765 | -1.727 | 2.577  | 1.00 | 0.00 |

```

ATOM 1991 C3 LIG 124 -18.270 -1.937 -1.658 1.00 0.00
ATOM 1992 H7 LIG 124 -18.216 -0.962 -2.126 1.00 0.00
ATOM 1993 C4 LIG 124 -18.080 -3.064 -2.341 1.00 0.00
TER
END

```

**Table F:** The number of atoms present in the system of BE-Nap

|      |    |     |     |   |       |        |        |      |      |
|------|----|-----|-----|---|-------|--------|--------|------|------|
| ATOM | 1  | N   | GLU | 1 | 7.051 | 19.438 | -6.219 | 1.00 | 0.00 |
| ATOM | 2  | H1  | GLU | 1 | 7.361 | 20.053 | -6.957 | 1.00 | 0.00 |
| ATOM | 3  | H2  | GLU | 1 | 7.458 | 18.525 | -6.365 | 1.00 | 0.00 |
| ATOM | 4  | H3  | GLU | 1 | 7.171 | 19.908 | -5.333 | 1.00 | 0.00 |
| ATOM | 5  | CA  | GLU | 1 | 5.581 | 19.242 | -6.365 | 1.00 | 0.00 |
| ATOM | 6  | HA  | GLU | 1 | 5.352 | 18.185 | -6.505 | 1.00 | 0.00 |
| ATOM | 7  | CB  | GLU | 1 | 4.874 | 19.732 | -5.098 | 1.00 | 0.00 |
| ATOM | 8  | HB2 | GLU | 1 | 5.295 | 19.226 | -4.229 | 1.00 | 0.00 |
| ATOM | 9  | HB3 | GLU | 1 | 5.017 | 20.807 | -4.996 | 1.00 | 0.00 |
| ATOM | 10 | CG  | GLU | 1 | 3.376 | 19.423 | -5.193 | 1.00 | 0.00 |
| ATOM | 11 | HG2 | GLU | 1 | 2.979 | 19.867 | -6.105 | 1.00 | 0.00 |
| ATOM | 12 | HG3 | GLU | 1 | 3.232 | 18.343 | -5.222 | 1.00 | 0.00 |
| ATOM | 13 | CD  | GLU | 1 | 2.644 | 20.001 | -3.986 | 1.00 | 0.00 |
| ATOM | 14 | OE1 | GLU | 1 | 2.773 | 19.435 | -2.912 | 1.00 | 0.00 |
| ATOM | 15 | OE2 | GLU | 1 | 1.962 | 20.999 | -4.153 | 1.00 | 0.00 |

|      |    |     |     |   |       |        |         |      |      |
|------|----|-----|-----|---|-------|--------|---------|------|------|
| ATOM | 16 | C   | GLU | 1 | 5.085 | 20.023 | -7.580  | 1.00 | 0.00 |
| ATOM | 17 | O   | GLU | 1 | 4.940 | 21.245 | -7.527  | 1.00 | 0.00 |
| ATOM | 18 | N   | ALA | 2 | 4.825 | 19.306 | -8.671  | 1.00 | 0.00 |
| ATOM | 19 | H   | ALA | 2 | 4.977 | 18.307 | -8.673  | 1.00 | 0.00 |
| ATOM | 20 | CA  | ALA | 2 | 4.341 | 19.936 | -9.896  | 1.00 | 0.00 |
| ATOM | 21 | HA  | ALA | 2 | 4.997 | 20.759 | -10.179 | 1.00 | 0.00 |
| ATOM | 22 | CB  | ALA | 2 | 4.317 | 18.916 | -11.036 | 1.00 | 0.00 |
| ATOM | 23 | HB1 | ALA | 2 | 3.657 | 18.090 | -10.771 | 1.00 | 0.00 |
| ATOM | 24 | HB2 | ALA | 2 | 3.953 | 19.394 | -11.945 | 1.00 | 0.00 |
| ATOM | 25 | HB3 | ALA | 2 | 5.325 | 18.535 | -11.205 | 1.00 | 0.00 |
| ATOM | 26 | C   | ALA | 2 | 2.940 | 20.504 | -9.691  | 1.00 | 0.00 |
| ATOM | 27 | O   | ALA | 2 | 2.147 | 19.961 | -8.923  | 1.00 | 0.00 |
| ATOM | 28 | N   | GLU | 3 | 2.645 | 21.600 | -10.383 | 1.00 | 0.00 |
| ATOM | 29 | H   | GLU | 3 | 3.338 | 22.027 | -10.980 | 1.00 | 0.00 |
| ATOM | 30 | CA  | GLU | 3 | 1.336 | 22.238 | -10.275 | 1.00 | 0.00 |
| ATOM | 31 | HA  | GLU | 3 | 1.125 | 22.481 | -9.233  | 1.00 | 0.00 |
| ATOM | 32 | CB  | GLU | 3 | 1.311 | 23.536 | -11.097 | 1.00 | 0.00 |
| ATOM | 33 | HB2 | GLU | 3 | 0.416 | 24.102 | -10.839 | 1.00 | 0.00 |
| ATOM | 34 | HB3 | GLU | 3 | 2.196 | 24.126 | -10.856 | 1.00 | 0.00 |
| ATOM | 35 | CG  | GLU | 3 | 1.301 | 23.219 | -12.600 | 1.00 | 0.00 |
| ATOM | 36 | HG2 | GLU | 3 | 0.420 | 22.621 | -12.832 | 1.00 | 0.00 |
| ATOM | 37 | HG3 | GLU | 3 | 1.262 | 24.154 | -13.158 | 1.00 | 0.00 |

|      |    |     |     |   |        |        |         |      |      |
|------|----|-----|-----|---|--------|--------|---------|------|------|
| ATOM | 38 | CD  | GLU | 3 | 2.559  | 22.444 | -12.992 | 1.00 | 0.00 |
| ATOM | 39 | OE1 | GLU | 3 | 3.644  | 22.949 | -12.754 | 1.00 | 0.00 |
| ATOM | 40 | OE2 | GLU | 3 | 2.418  | 21.354 | -13.524 | 1.00 | 0.00 |
| ATOM | 41 | C   | GLU | 3 | 0.233  | 21.297 | -10.758 | 1.00 | 0.00 |
| ATOM | 42 | O   | GLU | 3 | -0.925 | 21.428 | -10.359 | 1.00 | 0.00 |
| ATOM | 43 | N   | ALA | 4 | 0.603  | 20.353 | -11.621 | 1.00 | 0.00 |
| ATOM | 44 | H   | ALA | 4 | 1.559  | 20.305 | -11.944 | 1.00 | 0.00 |
| ATOM | 45 | CA  | ALA | 4 | -0.359 | 19.394 | -12.159 | 1.00 | 0.00 |
| ATOM | 46 | HA  | ALA | 4 | -1.256 | 19.923 | -12.479 | 1.00 | 0.00 |
| ATOM | 47 | CB  | ALA | 4 | 0.238  | 18.669 | -13.367 | 1.00 | 0.00 |
| ATOM | 48 | HB1 | ALA | 4 | 1.133  | 18.127 | -13.060 | 1.00 | 0.00 |
| ATOM | 49 | HB2 | ALA | 4 | -0.493 | 17.966 | -13.767 | 1.00 | 0.00 |
| ATOM | 50 | HB3 | ALA | 4 | 0.500  | 19.396 | -14.135 | 1.00 | 0.00 |
| ATOM | 51 | C   | ALA | 4 | -0.773 | 18.384 | -11.100 | 1.00 | 0.00 |
| ATOM | 52 | O   | ALA | 4 | -1.625 | 17.528 | -11.343 | 1.00 | 0.00 |
| ATOM | 53 | N   | GLN | 5 | -0.174 | 18.499 | -9.924  | 1.00 | 0.00 |
| ATOM | 54 | H   | GLN | 5 | 0.520  | 19.218 | -9.777  | 1.00 | 0.00 |
| ATOM | 55 | CA  | GLN | 5 | -0.488 | 17.607 | -8.818  | 1.00 | 0.00 |
| ATOM | 56 | HA  | GLN | 5 | -0.121 | 16.600 | -9.021  | 1.00 | 0.00 |
| ATOM | 57 | CB  | GLN | 5 | 0.191  | 18.128 | -7.556  | 1.00 | 0.00 |
| ATOM | 58 | HB2 | GLN | 5 | 1.267  | 18.182 | -7.723  | 1.00 | 0.00 |
| ATOM | 59 | HB3 | GLN | 5 | -0.191 | 19.123 | -7.327  | 1.00 | 0.00 |

|      |    |      |     |   |        |        |         |      |      |
|------|----|------|-----|---|--------|--------|---------|------|------|
| ATOM | 60 | CG   | GLN | 5 | -0.096 | 17.188 | -6.380  | 1.00 | 0.00 |
| ATOM | 61 | HG2  | GLN | 5 | -1.168 | 17.012 | -6.295  | 1.00 | 0.00 |
| ATOM | 62 | HG3  | GLN | 5 | 0.417  | 16.238 | -6.533  | 1.00 | 0.00 |
| ATOM | 63 | CD   | GLN | 5 | 0.401  | 17.806 | -5.077  | 1.00 | 0.00 |
| ATOM | 64 | OE1  | GLN | 5 | 0.013  | 18.922 | -4.730  | 1.00 | 0.00 |
| ATOM | 65 | NE2  | GLN | 5 | 1.239  | 17.143 | -4.329  | 1.00 | 0.00 |
| ATOM | 66 | HE21 | GLN | 5 | 1.571  | 17.548 | -3.465  | 1.00 | 0.00 |
| ATOM | 67 | HE22 | GLN | 5 | 1.553  | 16.227 | -4.617  | 1.00 | 0.00 |
| ATOM | 68 | C    | GLN | 5 | -1.997 | 17.548 | -8.593  | 1.00 | 0.00 |
| ATOM | 69 | O    | GLN | 5 | -2.547 | 16.495 | -8.271  | 1.00 | 0.00 |
| ATOM | 70 | N    | GLU | 6 | -2.656 | 18.693 | -8.760  | 1.00 | 0.00 |
| ATOM | 71 | H    | GLU | 6 | -2.154 | 19.537 | -8.995  | 1.00 | 0.00 |
| ATOM | 72 | CA   | GLU | 6 | -4.100 | 18.776 | -8.570  | 1.00 | 0.00 |
| ATOM | 73 | HA   | GLU | 6 | -4.354 | 18.584 | -7.527  | 1.00 | 0.00 |
| ATOM | 74 | CB   | GLU | 6 | -4.590 | 20.180 | -8.944  | 1.00 | 0.00 |
| ATOM | 75 | HB2  | GLU | 6 | -5.656 | 20.256 | -8.733  | 1.00 | 0.00 |
| ATOM | 76 | HB3  | GLU | 6 | -4.049 | 20.919 | -8.352  | 1.00 | 0.00 |
| ATOM | 77 | CG   | GLU | 6 | -4.344 | 20.440 | -10.435 | 1.00 | 0.00 |
| ATOM | 78 | HG2  | GLU | 6 | -3.310 | 20.192 | -10.676 | 1.00 | 0.00 |
| ATOM | 79 | HG3  | GLU | 6 | -5.014 | 19.814 | -11.024 | 1.00 | 0.00 |
| ATOM | 80 | CD   | GLU | 6 | -4.604 | 21.909 | -10.758 | 1.00 | 0.00 |
| ATOM | 81 | OE1  | GLU | 6 | -5.763 | 22.287 | -10.814 | 1.00 | 0.00 |



|      |     |     |     |   |        |        |         |      |      |
|------|-----|-----|-----|---|--------|--------|---------|------|------|
| ATOM | 82  | OE2 | GLU | 6 | -3.640 | 22.633 | -10.945 | 1.00 | 0.00 |
| ATOM | 83  | C   | GLU | 6 | -4.828 | 17.726 | -9.409  | 1.00 | 0.00 |
| ATOM | 84  | O   | GLU | 6 | -5.744 | 17.064 | -8.922  | 1.00 | 0.00 |
| ATOM | 85  | N   | GLU | 7 | -4.406 | 17.565 | -10.664 | 1.00 | 0.00 |
| ATOM | 86  | H   | GLU | 7 | -3.658 | 18.136 | -11.032 | 1.00 | 0.00 |
| ATOM | 87  | CA  | GLU | 7 | -5.018 | 16.577 | -11.544 | 1.00 | 0.00 |
| ATOM | 88  | HA  | GLU | 7 | -6.068 | 16.822 | -11.702 | 1.00 | 0.00 |
| ATOM | 89  | CB  | GLU | 7 | -4.308 | 16.561 | -12.904 | 1.00 | 0.00 |
| ATOM | 90  | HB2 | GLU | 7 | -4.505 | 17.497 | -13.425 | 1.00 | 0.00 |
| ATOM | 91  | HB3 | GLU | 7 | -3.234 | 16.450 | -12.750 | 1.00 | 0.00 |
| ATOM | 92  | CG  | GLU | 7 | -4.827 | 15.387 | -13.747 | 1.00 | 0.00 |
| ATOM | 93  | HG2 | GLU | 7 | -5.843 | 15.147 | -13.432 | 1.00 | 0.00 |
| ATOM | 94  | HG3 | GLU | 7 | -4.830 | 15.672 | -14.799 | 1.00 | 0.00 |
| ATOM | 95  | CD  | GLU | 7 | -3.933 | 14.164 | -13.554 | 1.00 | 0.00 |
| ATOM | 96  | OE1 | GLU | 7 | -2.763 | 14.249 | -13.890 | 1.00 | 0.00 |
| ATOM | 97  | OE2 | GLU | 7 | -4.432 | 13.158 | -13.077 | 1.00 | 0.00 |
| ATOM | 98  | C   | GLU | 7 | -4.928 | 15.202 | -10.908 | 1.00 | 0.00 |
| ATOM | 99  | O   | GLU | 7 | -5.868 | 14.409 | -10.969 | 1.00 | 0.00 |
| ATOM | 100 | N   | CYX | 8 | -3.775 | 14.929 | -10.306 | 1.00 | 0.00 |
| ATOM | 101 | H   | CYX | 8 | -3.025 | 15.606 | -10.298 | 1.00 | 0.00 |
| ATOM | 102 | CA  | CYX | 8 | -3.549 | 13.648 | -9.670  | 1.00 | 0.00 |
| ATOM | 103 | HA  | CYX | 8 | -3.806 | 12.840 | -10.355 | 1.00 | 0.00 |

|      |     |     |     |   |        |        |         |      |      |
|------|-----|-----|-----|---|--------|--------|---------|------|------|
| ATOM | 104 | CB  | CYX | 8 | -2.074 | 13.509 | -9.281  | 1.00 | 0.00 |
| ATOM | 105 | HB2 | CYX | 8 | -1.823 | 14.259 | -8.531  | 1.00 | 0.00 |
| ATOM | 106 | HB3 | CYX | 8 | -1.897 | 12.514 | -8.872  | 1.00 | 0.00 |
| ATOM | 107 | SG  | CYX | 8 | -1.037 | 13.748 | -10.744 | 1.00 | 0.00 |
| ATOM | 108 | C   | CYX | 8 | -4.419 | 13.499 | -8.429  | 1.00 | 0.00 |
| ATOM | 109 | O   | CYX | 8 | -5.206 | 12.559 | -8.327  | 1.00 | 0.00 |
| ATOM | 110 | N   | ARG | 9 | -4.270 | 14.433 | -7.493  | 1.00 | 0.00 |
| ATOM | 111 | H   | ARG | 9 | -3.595 | 15.174 | -7.617  | 1.00 | 0.00 |
| ATOM | 112 | CA  | ARG | 9 | -5.043 | 14.400 | -6.255  | 1.00 | 0.00 |
| ATOM | 113 | HA  | ARG | 9 | -4.777 | 13.519 | -5.670  | 1.00 | 0.00 |
| ATOM | 114 | CB  | ARG | 9 | -4.742 | 15.649 | -5.423  | 1.00 | 0.00 |
| ATOM | 115 | HB2 | ARG | 9 | -3.666 | 15.729 | -5.267  | 1.00 | 0.00 |
| ATOM | 116 | HB3 | ARG | 9 | -5.098 | 16.531 | -5.953  | 1.00 | 0.00 |
| ATOM | 117 | CG  | ARG | 9 | -5.448 | 15.549 | -4.066  | 1.00 | 0.00 |
| ATOM | 118 | HG2 | ARG | 9 | -6.527 | 15.522 | -4.219  | 1.00 | 0.00 |
| ATOM | 119 | HG3 | ARG | 9 | -5.131 | 14.638 | -3.558  | 1.00 | 0.00 |
| ATOM | 120 | CD  | ARG | 9 | -5.085 | 16.763 | -3.209  | 1.00 | 0.00 |
| ATOM | 121 | HD2 | ARG | 9 | -5.465 | 16.629 | -2.196  | 1.00 | 0.00 |
| ATOM | 122 | HD3 | ARG | 9 | -4.002 | 16.884 | -3.177  | 1.00 | 0.00 |
| ATOM | 123 | NE  | ARG | 9 | -5.675 | 17.974 | -3.774  | 1.00 | 0.00 |
| ATOM | 124 | HE  | ARG | 9 | -6.349 | 17.907 | -4.523  | 1.00 | 0.00 |
| ATOM | 125 | CZ  | ARG | 9 | -5.342 | 19.183 | -3.324  | 1.00 | 0.00 |

|      |     |      |     |    |         |        |         |      |      |
|------|-----|------|-----|----|---------|--------|---------|------|------|
| ATOM | 126 | NH1  | ARG | 9  | -4.476  | 19.308 | -2.355  | 1.00 | 0.00 |
| ATOM | 127 | HH11 | ARG | 9  | -4.058  | 18.484 | -1.946  | 1.00 | 0.00 |
| ATOM | 128 | HH12 | ARG | 9  | -4.228  | 20.227 | -2.019  | 1.00 | 0.00 |
| ATOM | 129 | NH2  | ARG | 9  | -5.885  | 20.245 | -3.851  | 1.00 | 0.00 |
| ATOM | 130 | HH21 | ARG | 9  | -6.556  | 20.146 | -4.599  | 1.00 | 0.00 |
| ATOM | 131 | HH22 | ARG | 9  | -5.631  | 21.160 | -3.508  | 1.00 | 0.00 |
| ATOM | 132 | C    | ARG | 9  | -6.538  | 14.323 | -6.547  | 1.00 | 0.00 |
| ATOM | 133 | O    | ARG | 9  | -7.261  | 13.555 | -5.915  | 1.00 | 0.00 |
| ATOM | 134 | N    | GLU | 10 | -6.996  | 15.121 | -7.508  | 1.00 | 0.00 |
| ATOM | 135 | H    | GLU | 10 | -6.373  | 15.751 | -7.993  | 1.00 | 0.00 |
| ATOM | 136 | CA   | GLU | 10 | -8.409  | 15.127 | -7.873  | 1.00 | 0.00 |
| ATOM | 137 | HA   | GLU | 10 | -9.018  | 15.400 | -7.011  | 1.00 | 0.00 |
| ATOM | 138 | CB   | GLU | 10 | -8.652  | 16.149 | -8.988  | 1.00 | 0.00 |
| ATOM | 139 | HB2  | GLU | 10 | -8.392  | 17.144 | -8.628  | 1.00 | 0.00 |
| ATOM | 140 | HB3  | GLU | 10 | -8.029  | 15.900 | -9.847  | 1.00 | 0.00 |
| ATOM | 141 | CG   | GLU | 10 | -10.129 | 16.124 | -9.402  | 1.00 | 0.00 |
| ATOM | 142 | HG2  | GLU | 10 | -10.736 | 15.830 | -8.546  | 1.00 | 0.00 |
| ATOM | 143 | HG3  | GLU | 10 | -10.423 | 17.120 | -9.731  | 1.00 | 0.00 |
| ATOM | 144 | CD   | GLU | 10 | -10.340 | 15.128 | -10.542 | 1.00 | 0.00 |
| ATOM | 145 | OE1  | GLU | 10 | -9.690  | 15.276 | -11.564 | 1.00 | 0.00 |
| ATOM | 146 | OE2  | GLU | 10 | -11.149 | 14.229 | -10.375 | 1.00 | 0.00 |
| ATOM | 147 | C    | GLU | 10 | -8.846  | 13.743 | -8.343  | 1.00 | 0.00 |

|      |     |      |     |    |        |        |         |      |      |
|------|-----|------|-----|----|--------|--------|---------|------|------|
| ATOM | 148 | O    | GLU | 10 | -9.871 | 13.219 | -7.903  | 1.00 | 0.00 |
| ATOM | 149 | N    | GLN | 11 | -8.059 | 13.164 | -9.246  | 1.00 | 0.00 |
| ATOM | 150 | H    | GLN | 11 | -7.248 | 13.653 | -9.596  | 1.00 | 0.00 |
| ATOM | 151 | CA   | GLN | 11 | -8.359 | 11.844 | -9.790  | 1.00 | 0.00 |
| ATOM | 152 | HA   | GLN | 11 | -9.337 | 11.849 | -10.271 | 1.00 | 0.00 |
| ATOM | 153 | CB   | GLN | 11 | -7.302 | 11.460 | -10.832 | 1.00 | 0.00 |
| ATOM | 154 | HB2  | GLN | 11 | -7.160 | 12.287 | -11.527 | 1.00 | 0.00 |
| ATOM | 155 | HB3  | GLN | 11 | -6.359 | 11.242 | -10.329 | 1.00 | 0.00 |
| ATOM | 156 | CG   | GLN | 11 | -7.768 | 10.220 | -11.603 | 1.00 | 0.00 |
| ATOM | 157 | HG2  | GLN | 11 | -7.844 | 9.369  | -10.925 | 1.00 | 0.00 |
| ATOM | 158 | HG3  | GLN | 11 | -8.740 | 10.410 | -12.057 | 1.00 | 0.00 |
| ATOM | 159 | CD   | GLN | 11 | -6.771 | 9.875  | -12.709 | 1.00 | 0.00 |
| ATOM | 160 | OE1  | GLN | 11 | -5.837 | 10.635 | -12.971 | 1.00 | 0.00 |
| ATOM | 161 | NE2  | GLN | 11 | -6.916 | 8.764  | -13.378 | 1.00 | 0.00 |
| ATOM | 162 | HE21 | GLN | 11 | -6.261 | 8.529  | -14.110 | 1.00 | 0.00 |
| ATOM | 163 | HE22 | GLN | 11 | -7.682 | 8.143  | -13.160 | 1.00 | 0.00 |
| ATOM | 164 | C    | GLN | 11 | -8.418 | 10.784 | -8.689  | 1.00 | 0.00 |
| ATOM | 165 | O    | GLN | 11 | -9.193 | 9.832  | -8.781  | 1.00 | 0.00 |
| ATOM | 166 | N    | MET | 12 | -7.587 | 10.942 | -7.657  | 1.00 | 0.00 |
| ATOM | 167 | H    | MET | 12 | -6.943 | 11.720 | -7.631  | 1.00 | 0.00 |
| ATOM | 168 | CA   | MET | 12 | -7.551 | 9.974  | -6.558  | 1.00 | 0.00 |
| ATOM | 169 | HA   | MET | 12 | -7.169 | 9.018  | -6.918  | 1.00 | 0.00 |

|      |     |     |     |    |         |        |        |      |      |
|------|-----|-----|-----|----|---------|--------|--------|------|------|
| ATOM | 170 | CB  | MET | 12 | -6.637  | 10.474 | -5.437 | 1.00 | 0.00 |
| ATOM | 171 | HB2 | MET | 12 | -6.924  | 11.487 | -5.156 | 1.00 | 0.00 |
| ATOM | 172 | HB3 | MET | 12 | -6.728  | 9.818  | -4.571 | 1.00 | 0.00 |
| ATOM | 173 | CG  | MET | 12 | -5.189  | 10.472 | -5.927 | 1.00 | 0.00 |
| ATOM | 174 | HG2 | MET | 12 | -4.904  | 9.462  | -6.223 | 1.00 | 0.00 |
| ATOM | 175 | HG3 | MET | 12 | -5.090  | 11.142 | -6.781 | 1.00 | 0.00 |
| ATOM | 176 | SD  | MET | 12 | -4.096  | 11.033 | -4.602 | 1.00 | 0.00 |
| ATOM | 177 | CE  | MET | 12 | -2.648  | 11.358 | -5.636 | 1.00 | 0.00 |
| ATOM | 178 | HE1 | MET | 12 | -2.897  | 12.110 | -6.384 | 1.00 | 0.00 |
| ATOM | 179 | HE2 | MET | 12 | -1.830  | 11.722 | -5.013 | 1.00 | 0.00 |
| ATOM | 180 | HE3 | MET | 12 | -2.342  | 10.437 | -6.134 | 1.00 | 0.00 |
| ATOM | 181 | C   | MET | 12 | -8.948  | 9.711  | -6.001 | 1.00 | 0.00 |
| ATOM | 182 | O   | MET | 12 | -9.289  | 8.567  | -5.702 | 1.00 | 0.00 |
| ATOM | 183 | N   | GLN | 13 | -9.758  | 10.762 | -5.870 | 1.00 | 0.00 |
| ATOM | 184 | H   | GLN | 13 | -9.450  | 11.694 | -6.106 | 1.00 | 0.00 |
| ATOM | 185 | CA  | GLN | 13 | -11.115 | 10.589 | -5.357 | 1.00 | 0.00 |
| ATOM | 186 | HA  | GLN | 13 | -11.075 | 10.183 | -4.346 | 1.00 | 0.00 |
| ATOM | 187 | CB  | GLN | 13 | -11.857 | 11.929 | -5.318 | 1.00 | 0.00 |
| ATOM | 188 | HB2 | GLN | 13 | -11.689 | 12.459 | -6.255 | 1.00 | 0.00 |
| ATOM | 189 | HB3 | GLN | 13 | -12.924 | 11.745 | -5.191 | 1.00 | 0.00 |
| ATOM | 190 | CG  | GLN | 13 | -11.344 | 12.779 | -4.151 | 1.00 | 0.00 |
| ATOM | 191 | HG2 | GLN | 13 | -11.974 | 13.660 | -4.035 | 1.00 | 0.00 |

|      |     |      |     |    |         |        |         |      |      |
|------|-----|------|-----|----|---------|--------|---------|------|------|
| ATOM | 192 | HG3  | GLN | 13 | -11.362 | 12.196 | -3.230  | 1.00 | 0.00 |
| ATOM | 193 | CD   | GLN | 13 | -9.912  | 13.235 | -4.411  | 1.00 | 0.00 |
| ATOM | 194 | OE1  | GLN | 13 | -8.962  | 12.561 | -4.013  | 1.00 | 0.00 |
| ATOM | 195 | NE2  | GLN | 13 | -9.700  | 14.349 | -5.056  | 1.00 | 0.00 |
| ATOM | 196 | HE21 | GLN | 13 | -8.753  | 14.655 | -5.231  | 1.00 | 0.00 |
| ATOM | 197 | HE22 | GLN | 13 | -10.483 | 14.899 | -5.377  | 1.00 | 0.00 |
| ATOM | 198 | C    | GLN | 13 | -11.875 | 9.614  | -6.243  | 1.00 | 0.00 |
| ATOM | 199 | O    | GLN | 13 | -12.545 | 8.708  | -5.752  | 1.00 | 0.00 |
| ATOM | 200 | N    | ARG | 14 | -11.729 | 9.789  | -7.554  | 1.00 | 0.00 |
| ATOM | 201 | H    | ARG | 14 | -11.172 | 10.557 | -7.901  | 1.00 | 0.00 |
| ATOM | 202 | CA   | ARG | 14 | -12.360 | 8.909  | -8.515  | 1.00 | 0.00 |
| ATOM | 203 | HA   | ARG | 14 | -13.443 | 8.945  | -8.396  | 1.00 | 0.00 |
| ATOM | 204 | CB   | ARG | 14 | -12.009 | 9.342  | -9.943  | 1.00 | 0.00 |
| ATOM | 205 | HB2  | ARG | 14 | -12.182 | 10.413 | -10.046 | 1.00 | 0.00 |
| ATOM | 206 | HB3  | ARG | 14 | -10.958 | 9.124  | -10.136 | 1.00 | 0.00 |
| ATOM | 207 | CG   | ARG | 14 | -12.881 | 8.584  | -10.950 | 1.00 | 0.00 |
| ATOM | 208 | HG2  | ARG | 14 | -12.408 | 8.612  | -11.932 | 1.00 | 0.00 |
| ATOM | 209 | HG3  | ARG | 14 | -12.988 | 7.548  | -10.628 | 1.00 | 0.00 |
| ATOM | 210 | CD   | ARG | 14 | -14.262 | 9.238  | -11.030 | 1.00 | 0.00 |
| ATOM | 211 | HD2  | ARG | 14 | -14.918 | 8.642  | -11.665 | 1.00 | 0.00 |
| ATOM | 212 | HD3  | ARG | 14 | -14.694 | 9.314  | -10.032 | 1.00 | 0.00 |
| ATOM | 213 | NE   | ARG | 14 | -14.153 | 10.580 | -11.597 | 1.00 | 0.00 |

|      |     |      |     |    |         |        |         |      |      |
|------|-----|------|-----|----|---------|--------|---------|------|------|
| ATOM | 214 | HE   | ARG | 14 | -13.358 | 10.823 | -12.170 | 1.00 | 0.00 |
| ATOM | 215 | CZ   | ARG | 14 | -15.085 | 11.506 | -11.377 | 1.00 | 0.00 |
| ATOM | 216 | NH1  | ARG | 14 | -16.130 | 11.228 | -10.645 | 1.00 | 0.00 |
| ATOM | 217 | HH11 | ARG | 14 | -16.231 | 10.306 | -10.244 | 1.00 | 0.00 |
| ATOM | 218 | HH12 | ARG | 14 | -16.832 | 11.935 | -10.483 | 1.00 | 0.00 |
| ATOM | 219 | NH2  | ARG | 14 | -14.953 | 12.697 | -11.895 | 1.00 | 0.00 |
| ATOM | 220 | HH21 | ARG | 14 | -14.144 | 12.911 | -12.460 | 1.00 | 0.00 |
| ATOM | 221 | HH22 | ARG | 14 | -15.660 | 13.398 | -11.727 | 1.00 | 0.00 |
| ATOM | 222 | C    | ARG | 14 | -11.865 | 7.503  | -8.259  | 1.00 | 0.00 |
| ATOM | 223 | O    | ARG | 14 | -12.635 | 6.542  | -8.266  | 1.00 | 0.00 |
| ATOM | 224 | N    | GLN | 15 | -10.559 | 7.405  | -8.009  | 1.00 | 0.00 |
| ATOM | 225 | H    | GLN | 15 | -9.965  | 8.221  | -8.034  | 1.00 | 0.00 |
| ATOM | 226 | CA   | GLN | 15 | -9.954  | 6.129  | -7.722  | 1.00 | 0.00 |
| ATOM | 227 | HA   | GLN | 15 | -10.337 | 5.372  | -8.406  | 1.00 | 0.00 |
| ATOM | 228 | CB   | GLN | 15 | -8.431  | 6.216  | -7.891  | 1.00 | 0.00 |
| ATOM | 229 | HB2  | GLN | 15 | -8.121  | 7.260  | -7.844  | 1.00 | 0.00 |
| ATOM | 230 | HB3  | GLN | 15 | -7.946  | 5.657  | -7.090  | 1.00 | 0.00 |
| ATOM | 231 | CG   | GLN | 15 | -8.026  | 5.624  | -9.245  | 1.00 | 0.00 |
| ATOM | 232 | HG2  | GLN | 15 | -6.991  | 5.283  | -9.204  | 1.00 | 0.00 |
| ATOM | 233 | HG3  | GLN | 15 | -8.674  | 4.785  | -9.499  | 1.00 | 0.00 |
| ATOM | 234 | CD   | GLN | 15 | -8.148  | 6.682  | -10.337 | 1.00 | 0.00 |
| ATOM | 235 | OE1  | GLN | 15 | -7.141  | 7.208  | -10.808 | 1.00 | 0.00 |

|      |     |      |     |    |         |       |         |      |      |
|------|-----|------|-----|----|---------|-------|---------|------|------|
| ATOM | 236 | NE2  | GLN | 15 | -9.331  | 7.031 | -10.766 | 1.00 | 0.00 |
| ATOM | 237 | HE21 | GLN | 15 | -9.416  | 7.731 | -11.489 | 1.00 | 0.00 |
| ATOM | 238 | HE22 | GLN | 15 | -10.155 | 6.599 | -10.373 | 1.00 | 0.00 |
| ATOM | 239 | C    | GLN | 15 | -10.306 | 5.723 | -6.300  | 1.00 | 0.00 |
| ATOM | 240 | O    | GLN | 15 | -9.484  | 5.807 | -5.386  | 1.00 | 0.00 |
| ATOM | 241 | N    | GLN | 16 | -11.537 | 5.277 | -6.135  | 1.00 | 0.00 |
| ATOM | 242 | H    | GLN | 16 | -12.175 | 5.255 | -6.917  | 1.00 | 0.00 |
| ATOM | 243 | CA   | GLN | 16 | -12.026 | 4.841 | -4.833  | 1.00 | 0.00 |
| ATOM | 244 | HA   | GLN | 16 | -11.615 | 5.473 | -4.045  | 1.00 | 0.00 |
| ATOM | 245 | CB   | GLN | 16 | -13.551 | 4.943 | -4.795  | 1.00 | 0.00 |
| ATOM | 246 | HB2  | GLN | 16 | -13.983 | 4.323 | -5.581  | 1.00 | 0.00 |
| ATOM | 247 | HB3  | GLN | 16 | -13.920 | 4.608 | -3.825  | 1.00 | 0.00 |
| ATOM | 248 | CG   | GLN | 16 | -13.953 | 6.402 | -5.017  | 1.00 | 0.00 |
| ATOM | 249 | HG2  | GLN | 16 | -13.523 | 7.020 | -4.228  | 1.00 | 0.00 |
| ATOM | 250 | HG3  | GLN | 16 | -13.584 | 6.740 | -5.985  | 1.00 | 0.00 |
| ATOM | 251 | CD   | GLN | 16 | -15.470 | 6.563 | -4.990  | 1.00 | 0.00 |
| ATOM | 252 | OE1  | GLN | 16 | -16.206 | 5.575 | -4.974  | 1.00 | 0.00 |
| ATOM | 253 | NE2  | GLN | 16 | -15.980 | 7.764 | -4.987  | 1.00 | 0.00 |
| ATOM | 254 | HE21 | GLN | 16 | -16.982 | 7.883 | -4.969  | 1.00 | 0.00 |
| ATOM | 255 | HE22 | GLN | 16 | -15.369 | 8.568 | -5.002  | 1.00 | 0.00 |
| ATOM | 256 | C    | GLN | 16 | -11.576 | 3.409 | -4.572  | 1.00 | 0.00 |
| ATOM | 257 | O    | GLN | 16 | -12.346 | 2.575 | -4.087  | 1.00 | 0.00 |



|      |     |     |     |    |         |       |        |      |      |
|------|-----|-----|-----|----|---------|-------|--------|------|------|
| ATOM | 258 | N   | MET | 17 | -10.321 | 3.134 | -4.920 | 1.00 | 0.00 |
| ATOM | 259 | H   | MET | 17 | -9.746  | 3.847 | -5.346 | 1.00 | 0.00 |
| ATOM | 260 | CA  | MET | 17 | -9.755  | 1.801 | -4.749 | 1.00 | 0.00 |
| ATOM | 261 | HA  | MET | 17 | -10.393 | 1.060 | -5.231 | 1.00 | 0.00 |
| ATOM | 262 | CB  | MET | 17 | -8.360  | 1.735 | -5.385 | 1.00 | 0.00 |
| ATOM | 263 | HB2 | MET | 17 | -8.204  | 0.736 | -5.793 | 1.00 | 0.00 |
| ATOM | 264 | HB3 | MET | 17 | -8.303  | 2.468 | -6.189 | 1.00 | 0.00 |
| ATOM | 265 | CG  | MET | 17 | -7.279  | 2.034 | -4.345 | 1.00 | 0.00 |
| ATOM | 266 | HG2 | MET | 17 | -7.609  | 2.835 | -3.684 | 1.00 | 0.00 |
| ATOM | 267 | HG3 | MET | 17 | -7.072  | 1.140 | -3.756 | 1.00 | 0.00 |
| ATOM | 268 | SD  | MET | 17 | -5.770  | 2.548 | -5.193 | 1.00 | 0.00 |
| ATOM | 269 | CE  | MET | 17 | -6.400  | 4.123 | -5.821 | 1.00 | 0.00 |
| ATOM | 270 | HE1 | MET | 17 | -6.703  | 4.753 | -4.985 | 1.00 | 0.00 |
| ATOM | 271 | HE2 | MET | 17 | -5.618  | 4.626 | -6.390 | 1.00 | 0.00 |
| ATOM | 272 | HE3 | MET | 17 | -7.258  | 3.940 | -6.467 | 1.00 | 0.00 |
| ATOM | 273 | C   | MET | 17 | -9.673  | 1.410 | -3.282 | 1.00 | 0.00 |
| ATOM | 274 | O   | MET | 17 | -9.672  | 0.228 | -2.954 | 1.00 | 0.00 |
| ATOM | 275 | N   | LEU | 18 | -9.591  | 2.411 | -2.414 | 1.00 | 0.00 |
| ATOM | 276 | H   | LEU | 18 | -9.576  | 3.365 | -2.745 | 1.00 | 0.00 |
| ATOM | 277 | CA  | LEU | 18 | -9.480  | 2.176 | -0.977 | 1.00 | 0.00 |
| ATOM | 278 | HA  | LEU | 18 | -8.582  | 1.595 | -0.764 | 1.00 | 0.00 |
| ATOM | 279 | CB  | LEU | 18 | -9.392  | 3.498 | -0.231 | 1.00 | 0.00 |

|      |     |          |    |         |       |        |      |      |
|------|-----|----------|----|---------|-------|--------|------|------|
| ATOM | 280 | HB2 LEU  | 18 | -10.313 | 4.059 | -0.387 | 1.00 | 0.00 |
| ATOM | 281 | HB3 LEU  | 18 | -9.258  | 3.309 | 0.834  | 1.00 | 0.00 |
| ATOM | 282 | CG LEU   | 18 | -8.205  | 4.310 | -0.758 | 1.00 | 0.00 |
| ATOM | 283 | HG LEU   | 18 | -7.349  | 3.650 | -0.901 | 1.00 | 0.00 |
| ATOM | 284 | CD1 LEU  | 18 | -8.578  | 4.959 | -2.095 | 1.00 | 0.00 |
| ATOM | 285 | HD11 LEU | 18 | -9.433  | 5.619 | -1.952 | 1.00 | 0.00 |
| ATOM | 286 | HD12 LEU | 18 | -7.732  | 5.536 | -2.468 | 1.00 | 0.00 |
| ATOM | 287 | HD13 LEU | 18 | -8.834  | 4.183 | -2.817 | 1.00 | 0.00 |
| ATOM | 288 | CD2 LEU  | 18 | -7.838  | 5.398 | 0.256  | 1.00 | 0.00 |
| ATOM | 289 | HD21 LEU | 18 | -7.567  | 4.934 | 1.205  | 1.00 | 0.00 |
| ATOM | 290 | HD22 LEU | 18 | -6.993  | 5.975 | -0.119 | 1.00 | 0.00 |
| ATOM | 291 | HD23 LEU | 18 | -8.691  | 6.059 | 0.406  | 1.00 | 0.00 |
| ATOM | 292 | C LEU    | 18 | -10.666 | 1.374 | -0.459 | 1.00 | 0.00 |
| ATOM | 293 | O LEU    | 18 | -10.559 | 0.711 | 0.564  | 1.00 | 0.00 |
| ATOM | 294 | N SER    | 19 | -11.795 | 1.424 | -1.162 | 1.00 | 0.00 |
| ATOM | 295 | H SER    | 19 | -11.873 | 1.993 | -1.993 | 1.00 | 0.00 |
| ATOM | 296 | CA SER   | 19 | -12.962 | 0.660 | -0.734 | 1.00 | 0.00 |
| ATOM | 297 | HA SER   | 19 | -13.201 | 0.896 | 0.303  | 1.00 | 0.00 |
| ATOM | 298 | CB SER   | 19 | -14.170 | 1.008 | -1.607 | 1.00 | 0.00 |
| ATOM | 299 | HB2 SER  | 19 | -13.997 | 0.662 | -2.626 | 1.00 | 0.00 |
| ATOM | 300 | HB3 SER  | 19 | -15.062 | 0.525 | -1.207 | 1.00 | 0.00 |
| ATOM | 301 | OG SER   | 19 | -14.355 | 2.418 | -1.610 | 1.00 | 0.00 |

|      |     |     |     |    |         |        |        |      |      |
|------|-----|-----|-----|----|---------|--------|--------|------|------|
| ATOM | 302 | HG  | SER | 19 | -15.112 | 2.640  | -2.157 | 1.00 | 0.00 |
| ATOM | 303 | C   | SER | 19 | -12.653 | -0.832 | -0.848 | 1.00 | 0.00 |
| ATOM | 304 | O   | SER | 19 | -12.767 | -1.590 | 0.123  | 1.00 | 0.00 |
| ATOM | 305 | N   | HIE | 20 | -12.220 | -1.232 | -2.042 | 1.00 | 0.00 |
| ATOM | 306 | H   | HIE | 20 | -12.145 | -0.568 | -2.799 | 1.00 | 0.00 |
| ATOM | 307 | CA  | HIE | 20 | -11.853 | -2.620 | -2.300 | 1.00 | 0.00 |
| ATOM | 308 | HA  | HIE | 20 | -12.629 | -3.286 | -1.923 | 1.00 | 0.00 |
| ATOM | 309 | CB  | HIE | 20 | -11.694 | -2.857 | -3.809 | 1.00 | 0.00 |
| ATOM | 310 | HB2 | HIE | 20 | -10.657 | -2.821 | -4.142 | 1.00 | 0.00 |
| ATOM | 311 | HB3 | HIE | 20 | -12.136 | -3.809 | -4.102 | 1.00 | 0.00 |
| ATOM | 312 | CG  | HIE | 20 | -12.429 | -1.787 | -4.571 | 1.00 | 0.00 |
| ATOM | 313 | ND1 | HIE | 20 | -11.776 | -0.898 | -5.409 | 1.00 | 0.00 |
| ATOM | 314 | CE1 | HIE | 20 | -12.701 | -0.063 | -5.915 | 1.00 | 0.00 |
| ATOM | 315 | HE1 | HIE | 20 | -12.354 | 0.708  | -6.603 | 1.00 | 0.00 |
| ATOM | 316 | NE2 | HIE | 20 | -13.924 | -0.346 | -5.461 | 1.00 | 0.00 |
| ATOM | 317 | HE2 | HIE | 20 | -14.807 | 0.102  | -5.659 | 1.00 | 0.00 |
| ATOM | 318 | CD2 | HIE | 20 | -13.755 | -1.436 | -4.613 | 1.00 | 0.00 |
| ATOM | 319 | HD2 | HIE | 20 | -14.616 | -1.871 | -4.106 | 1.00 | 0.00 |
| ATOM | 320 | C   | HIE | 20 | -10.542 | -2.919 | -1.592 | 1.00 | 0.00 |
| ATOM | 321 | O   | HIE | 20 | -10.328 | -4.014 | -1.073 | 1.00 | 0.00 |
| ATOM | 322 | N   | CYX | 21 | -9.675  | -1.913 | -1.570 | 1.00 | 0.00 |
| ATOM | 323 | H   | CYX | 21 | -9.898  | -1.050 | -2.044 | 1.00 | 0.00 |

|      |     |     |     |    |         |        |        |      |      |
|------|-----|-----|-----|----|---------|--------|--------|------|------|
| ATOM | 324 | CA  | CYX | 21 | -8.385  | -2.025 | -0.918 | 1.00 | 0.00 |
| ATOM | 325 | HA  | CYX | 21 | -7.812  | -2.852 | -1.337 | 1.00 | 0.00 |
| ATOM | 326 | CB  | CYX | 21 | -7.604  | -0.723 | -1.144 | 1.00 | 0.00 |
| ATOM | 327 | HB2 | CYX | 21 | -8.293  | 0.068  | -1.437 | 1.00 | 0.00 |
| ATOM | 328 | HB3 | CYX | 21 | -7.096  | -0.439 | -0.222 | 1.00 | 0.00 |
| ATOM | 329 | SG  | CYX | 21 | -6.408  | -0.983 | -2.479 | 1.00 | 0.00 |
| ATOM | 330 | C   | CYX | 21 | -8.587  | -2.304 | 0.571  | 1.00 | 0.00 |
| ATOM | 331 | O   | CYX | 21 | -7.974  | -3.213 | 1.133  | 1.00 | 0.00 |
| ATOM | 332 | N   | ARG | 22 | -9.487  | -1.547 | 1.192  | 1.00 | 0.00 |
| ATOM | 333 | H   | ARG | 22 | -9.963  | -0.805 | 0.700  | 1.00 | 0.00 |
| ATOM | 334 | CA  | ARG | 22 | -9.803  | -1.756 | 2.598  | 1.00 | 0.00 |
| ATOM | 335 | HA  | ARG | 22 | -8.911  | -1.604 | 3.206  | 1.00 | 0.00 |
| ATOM | 336 | CB  | ARG | 22 | -10.879 | -0.765 | 3.051  | 1.00 | 0.00 |
| ATOM | 337 | HB2 | ARG | 22 | -10.580 | 0.244  | 2.768  | 1.00 | 0.00 |
| ATOM | 338 | HB3 | ARG | 22 | -11.823 | -1.014 | 2.567  | 1.00 | 0.00 |
| ATOM | 339 | CG  | ARG | 22 | -11.051 | -0.838 | 4.571  | 1.00 | 0.00 |
| ATOM | 340 | HG2 | ARG | 22 | -11.270 | -1.865 | 4.864  | 1.00 | 0.00 |
| ATOM | 341 | HG3 | ARG | 22 | -10.132 | -0.511 | 5.058  | 1.00 | 0.00 |
| ATOM | 342 | CD  | ARG | 22 | -12.207 | 0.072  | 4.998  | 1.00 | 0.00 |
| ATOM | 343 | HD2 | ARG | 22 | -13.148 | -0.316 | 4.608  | 1.00 | 0.00 |
| ATOM | 344 | HD3 | ARG | 22 | -12.258 | 0.121  | 6.086  | 1.00 | 0.00 |
| ATOM | 345 | NE  | ARG | 22 | -12.005 | 1.423  | 4.477  | 1.00 | 0.00 |

|      |     |      |     |    |         |        |        |      |      |
|------|-----|------|-----|----|---------|--------|--------|------|------|
| ATOM | 346 | HE   | ARG | 22 | -11.383 | 2.060  | 4.955  | 1.00 | 0.00 |
| ATOM | 347 | CZ   | ARG | 22 | -12.627 | 1.847  | 3.374  | 1.00 | 0.00 |
| ATOM | 348 | NH1  | ARG | 22 | -13.456 | 1.061  | 2.739  | 1.00 | 0.00 |
| ATOM | 349 | HH11 | ARG | 22 | -13.627 | 0.127  | 3.085  | 1.00 | 0.00 |
| ATOM | 350 | HH12 | ARG | 22 | -13.921 | 1.390  | 1.906  | 1.00 | 0.00 |
| ATOM | 351 | NH2  | ARG | 22 | -12.406 | 3.052  | 2.925  | 1.00 | 0.00 |
| ATOM | 352 | HH21 | ARG | 22 | -11.764 | 3.660  | 3.414  | 1.00 | 0.00 |
| ATOM | 353 | HH22 | ARG | 22 | -12.877 | 3.371  | 2.091  | 1.00 | 0.00 |
| ATOM | 354 | C    | ARG | 22 | -10.300 | -3.182 | 2.769  | 1.00 | 0.00 |
| ATOM | 355 | O    | ARG | 22 | -9.870  | -3.909 | 3.672  | 1.00 | 0.00 |
| ATOM | 356 | N    | MET | 23 | -11.191 | -3.588 | 1.858  | 1.00 | 0.00 |
| ATOM | 357 | H    | MET | 23 | -11.527 | -2.958 | 1.145  | 1.00 | 0.00 |
| ATOM | 358 | CA   | MET | 23 | -11.715 | -4.943 | 1.883  | 1.00 | 0.00 |
| ATOM | 359 | HA   | MET | 23 | -12.265 | -5.111 | 2.809  | 1.00 | 0.00 |
| ATOM | 360 | CB   | MET | 23 | -12.665 | -5.168 | 0.700  | 1.00 | 0.00 |
| ATOM | 361 | HB2  | MET | 23 | -13.418 | -4.380 | 0.687  | 1.00 | 0.00 |
| ATOM | 362 | HB3  | MET | 23 | -12.096 | -5.142 | -0.229 | 1.00 | 0.00 |
| ATOM | 363 | CG   | MET | 23 | -13.353 | -6.528 | 0.839  | 1.00 | 0.00 |
| ATOM | 364 | HG2  | MET | 23 | -12.602 | -7.314 | 0.924  | 1.00 | 0.00 |
| ATOM | 365 | HG3  | MET | 23 | -13.984 | -6.533 | 1.728  | 1.00 | 0.00 |
| ATOM | 366 | SD   | MET | 23 | -14.378 | -6.838 | -0.621 | 1.00 | 0.00 |
| ATOM | 367 | CE   | MET | 23 | -13.031 | -7.163 | -1.787 | 1.00 | 0.00 |

|      |     |     |     |    |         |        |        |      |      |
|------|-----|-----|-----|----|---------|--------|--------|------|------|
| ATOM | 368 | HE1 | MET | 23 | -12.448 | -8.017 | -1.441 | 1.00 | 0.00 |
| ATOM | 369 | HE2 | MET | 23 | -13.446 | -7.382 | -2.771 | 1.00 | 0.00 |
| ATOM | 370 | HE3 | MET | 23 | -12.386 | -6.287 | -1.852 | 1.00 | 0.00 |
| ATOM | 371 | C   | MET | 23 | -10.550 | -5.923 | 1.814  | 1.00 | 0.00 |
| ATOM | 372 | O   | MET | 23 | -10.550 | -6.951 | 2.488  | 1.00 | 0.00 |
| ATOM | 373 | N   | TYR | 24 | -9.548  | -5.574 | 1.003  | 1.00 | 0.00 |
| ATOM | 374 | H   | TYR | 24 | -9.622  | -4.741 | 0.437  | 1.00 | 0.00 |
| ATOM | 375 | CA  | TYR | 24 | -8.357  | -6.404 | 0.860  | 1.00 | 0.00 |
| ATOM | 376 | HA  | TYR | 24 | -8.633  | -7.401 | 0.515  | 1.00 | 0.00 |
| ATOM | 377 | CB  | TYR | 24 | -7.399  | -5.773 | -0.172 | 1.00 | 0.00 |
| ATOM | 378 | HB2 | TYR | 24 | -7.391  | -6.388 | -1.072 | 1.00 | 0.00 |
| ATOM | 379 | HB3 | TYR | 24 | -7.778  | -4.780 | -0.413 | 1.00 | 0.00 |
| ATOM | 380 | CG  | TYR | 24 | -5.986  | -5.656 | 0.372  | 1.00 | 0.00 |
| ATOM | 381 | CD1 | TYR | 24 | -5.289  | -6.798 | 0.783  | 1.00 | 0.00 |
| ATOM | 382 | HD1 | TYR | 24 | -5.763  | -7.778 | 0.722  | 1.00 | 0.00 |
| ATOM | 383 | CE1 | TYR | 24 | -3.982  | -6.682 | 1.273  | 1.00 | 0.00 |
| ATOM | 384 | HE1 | TYR | 24 | -3.442  | -7.571 | 1.601  | 1.00 | 0.00 |
| ATOM | 385 | CZ  | TYR | 24 | -3.371  | -5.425 | 1.346  | 1.00 | 0.00 |
| ATOM | 386 | OH  | TYR | 24 | -2.081  | -5.311 | 1.822  | 1.00 | 0.00 |
| ATOM | 387 | HH  | TYR | 24 | -1.698  | -6.155 | 2.075  | 1.00 | 0.00 |
| ATOM | 388 | CE2 | TYR | 24 | -4.065  | -4.285 | 0.933  | 1.00 | 0.00 |
| ATOM | 389 | HE2 | TYR | 24 | -3.588  | -3.307 | 0.990  | 1.00 | 0.00 |

|      |     |         |    |        |        |       |      |      |
|------|-----|---------|----|--------|--------|-------|------|------|
| ATOM | 390 | CD2 TYR | 24 | -5.372 | -4.399 | 0.446 | 1.00 | 0.00 |
| ATOM | 391 | HD2 TYR | 24 | -5.913 | -3.510 | 0.124 | 1.00 | 0.00 |
| ATOM | 392 | C TYR   | 24 | -7.681 | -6.575 | 2.218 | 1.00 | 0.00 |
| ATOM | 393 | O TYR   | 24 | -7.275 | -7.675 | 2.582 | 1.00 | 0.00 |
| ATOM | 394 | N MET   | 25 | -7.575 | -5.483 | 2.974 | 1.00 | 0.00 |
| ATOM | 395 | H MET   | 25 | -7.916 | -4.589 | 2.653 | 1.00 | 0.00 |
| ATOM | 396 | CA MET  | 25 | -6.961 | -5.555 | 4.297 | 1.00 | 0.00 |
| ATOM | 397 | HA MET  | 25 | -5.912 | -5.839 | 4.207 | 1.00 | 0.00 |
| ATOM | 398 | CB MET  | 25 | -7.041 | -4.193 | 4.988 | 1.00 | 0.00 |
| ATOM | 399 | HB2 MET | 25 | -8.087 | -3.919 | 5.122 | 1.00 | 0.00 |
| ATOM | 400 | HB3 MET | 25 | -6.555 | -4.255 | 5.962 | 1.00 | 0.00 |
| ATOM | 401 | CG MET  | 25 | -6.339 | -3.130 | 4.133 | 1.00 | 0.00 |
| ATOM | 402 | HG2 MET | 25 | -6.755 | -3.138 | 3.126 | 1.00 | 0.00 |
| ATOM | 403 | HG3 MET | 25 | -6.486 | -2.147 | 4.580 | 1.00 | 0.00 |
| ATOM | 404 | SD MET  | 25 | -4.567 | -3.485 | 4.046 | 1.00 | 0.00 |
| ATOM | 405 | CE MET  | 25 | -4.159 | -3.037 | 5.751 | 1.00 | 0.00 |
| ATOM | 406 | HE1 MET | 25 | -4.724 | -3.667 | 6.438 | 1.00 | 0.00 |
| ATOM | 407 | HE2 MET | 25 | -3.092 | -3.183 | 5.920 | 1.00 | 0.00 |
| ATOM | 408 | HE3 MET | 25 | -4.414 | -1.992 | 5.924 | 1.00 | 0.00 |
| ATOM | 409 | C MET   | 25 | -7.706 | -6.589 | 5.136 | 1.00 | 0.00 |
| ATOM | 410 | O MET   | 25 | -7.108 | -7.507 | 5.717 | 1.00 | 0.00 |
| ATOM | 411 | N ARG   | 26 | -9.031 | -6.455 | 5.164 | 1.00 | 0.00 |

|      |     |      |     |    |         |         |        |      |      |
|------|-----|------|-----|----|---------|---------|--------|------|------|
| ATOM | 412 | H    | ARG | 26 | -9.485  | -5.687  | 4.692  | 1.00 | 0.00 |
| ATOM | 413 | CA   | ARG | 26 | -9.858  | -7.400  | 5.897  | 1.00 | 0.00 |
| ATOM | 414 | HA   | ARG | 26 | -9.582  | -7.396  | 6.952  | 1.00 | 0.00 |
| ATOM | 415 | CB   | ARG | 26 | -11.337 | -7.012  | 5.775  | 1.00 | 0.00 |
| ATOM | 416 | HB2  | ARG | 26 | -11.468 | -5.984  | 6.111  | 1.00 | 0.00 |
| ATOM | 417 | HB3  | ARG | 26 | -11.646 | -7.096  | 4.733  | 1.00 | 0.00 |
| ATOM | 418 | CG   | ARG | 26 | -12.194 | -7.944  | 6.639  | 1.00 | 0.00 |
| ATOM | 419 | HG2  | ARG | 26 | -13.246 | -7.791  | 6.399  | 1.00 | 0.00 |
| ATOM | 420 | HG3  | ARG | 26 | -11.921 | -8.979  | 6.431  | 1.00 | 0.00 |
| ATOM | 421 | CD   | ARG | 26 | -11.960 | -7.643  | 8.122  | 1.00 | 0.00 |
| ATOM | 422 | HD2  | ARG | 26 | -10.898 | -7.722  | 8.355  | 1.00 | 0.00 |
| ATOM | 423 | HD3  | ARG | 26 | -12.309 | -6.638  | 8.357  | 1.00 | 0.00 |
| ATOM | 424 | NE   | ARG | 26 | -12.692 | -8.599  | 8.950  | 1.00 | 0.00 |
| ATOM | 425 | HE   | ARG | 26 | -13.601 | -8.928  | 8.657  | 1.00 | 0.00 |
| ATOM | 426 | CZ   | ARG | 26 | -12.189 | -9.057  | 10.097 | 1.00 | 0.00 |
| ATOM | 427 | NH1  | ARG | 26 | -11.021 | -8.651  | 10.516 | 1.00 | 0.00 |
| ATOM | 428 | HH11 | ARG | 26 | -10.494 | -7.986  | 9.968  | 1.00 | 0.00 |
| ATOM | 429 | HH12 | ARG | 26 | -10.649 | -9.005  | 11.386 | 1.00 | 0.00 |
| ATOM | 430 | NH2  | ARG | 26 | -12.870 | -9.916  | 10.804 | 1.00 | 0.00 |
| ATOM | 431 | HH21 | ARG | 26 | -13.773 | -10.230 | 10.479 | 1.00 | 0.00 |
| ATOM | 432 | HH22 | ARG | 26 | -12.490 | -10.264 | 11.673 | 1.00 | 0.00 |
| ATOM | 433 | C    | ARG | 26 | -9.624  | -8.793  | 5.327  | 1.00 | 0.00 |



|      |     |      |     |    |         |         |       |      |      |
|------|-----|------|-----|----|---------|---------|-------|------|------|
| ATOM | 434 | O    | ARG | 26 | -9.515  | -9.780  | 6.062 | 1.00 | 0.00 |
| ATOM | 435 | N    | GLN | 27 | -9.507  | -8.853  | 4.005 | 1.00 | 0.00 |
| ATOM | 436 | H    | GLN | 27 | -9.631  | -8.025  | 3.440 | 1.00 | 0.00 |
| ATOM | 437 | CA   | GLN | 27 | -9.242  | -10.106 | 3.335 | 1.00 | 0.00 |
| ATOM | 438 | HA   | GLN | 27 | -10.036 | -10.818 | 3.560 | 1.00 | 0.00 |
| ATOM | 439 | CB   | GLN | 27 | -9.179  | -9.906  | 1.813 | 1.00 | 0.00 |
| ATOM | 440 | HB2  | GLN | 27 | -10.157 | -9.589  | 1.453 | 1.00 | 0.00 |
| ATOM | 441 | HB3  | GLN | 27 | -8.440  | -9.138  | 1.583 | 1.00 | 0.00 |
| ATOM | 442 | CG   | GLN | 27 | -8.782  | -11.220 | 1.125 | 1.00 | 0.00 |
| ATOM | 443 | HG2  | GLN | 27 | -8.898  | -11.114 | 0.047 | 1.00 | 0.00 |
| ATOM | 444 | HG3  | GLN | 27 | -7.746  | -11.470 | 1.356 | 1.00 | 0.00 |
| ATOM | 445 | CD   | GLN | 27 | -9.675  | -12.360 | 1.601 | 1.00 | 0.00 |
| ATOM | 446 | OE1  | GLN | 27 | -10.517 | -12.852 | 0.850 | 1.00 | 0.00 |
| ATOM | 447 | NE2  | GLN | 27 | -9.542  | -12.801 | 2.821 | 1.00 | 0.00 |
| ATOM | 448 | HE21 | GLN | 27 | -10.127 | -13.556 | 3.149 | 1.00 | 0.00 |
| ATOM | 449 | HE22 | GLN | 27 | -8.854  | -12.386 | 3.433 | 1.00 | 0.00 |
| ATOM | 450 | C    | GLN | 27 | -7.935  | -10.677 | 3.855 | 1.00 | 0.00 |
| ATOM | 451 | O    | GLN | 27 | -7.801  | -11.875 | 4.053 | 1.00 | 0.00 |
| ATOM | 452 | N    | GLN | 28 | -6.970  | -9.815  | 4.111 | 1.00 | 0.00 |
| ATOM | 453 | H    | GLN | 28 | -7.079  | -8.823  | 3.959 | 1.00 | 0.00 |
| ATOM | 454 | CA   | GLN | 28 | -5.715  | -10.291 | 4.624 | 1.00 | 0.00 |
| ATOM | 455 | HA   | GLN | 28 | -5.251  | -10.976 | 3.914 | 1.00 | 0.00 |

|      |     |      |     |    |        |         |       |      |      |
|------|-----|------|-----|----|--------|---------|-------|------|------|
| ATOM | 456 | CB   | GLN | 28 | -4.786 | -9.122  | 4.845 | 1.00 | 0.00 |
| ATOM | 457 | HB2  | GLN | 28 | -4.733 | -8.531  | 3.931 | 1.00 | 0.00 |
| ATOM | 458 | HB3  | GLN | 28 | -5.175 | -8.505  | 5.655 | 1.00 | 0.00 |
| ATOM | 459 | CG   | GLN | 28 | -3.384 | -9.621  | 5.212 | 1.00 | 0.00 |
| ATOM | 460 | HG2  | GLN | 28 | -3.144 | -10.512 | 4.632 | 1.00 | 0.00 |
| ATOM | 461 | HG3  | GLN | 28 | -2.648 | -8.844  | 5.005 | 1.00 | 0.00 |
| ATOM | 462 | CD   | GLN | 28 | -3.317 | -9.973  | 6.696 | 1.00 | 0.00 |
| ATOM | 463 | OE1  | GLN | 28 | -2.879 | -11.148 | 7.058 | 1.00 | 0.00 |
| ATOM | 464 | NE2  | GLN | 28 | -3.673 | -9.157  | 7.547 | 1.00 | 0.00 |
| ATOM | 465 | HE21 | GLN | 28 | -3.624 | -9.400  | 8.527 | 1.00 | 0.00 |
| ATOM | 466 | HE22 | GLN | 28 | -4.011 | -8.250  | 7.262 | 1.00 | 0.00 |
| ATOM | 467 | C    | GLN | 28 | -5.957 | -11.008 | 5.941 | 1.00 | 0.00 |
| ATOM | 468 | O    | GLN | 28 | -5.350 | -12.044 | 6.217 | 1.00 | 0.00 |
| ATOM | 469 | N    | MET | 29 | -6.862 | -10.452 | 6.749 | 1.00 | 0.00 |
| ATOM | 470 | H    | MET | 29 | -7.326 | -9.591  | 6.500 | 1.00 | 0.00 |
| ATOM | 471 | CA   | MET | 29 | -7.183 | -11.065 | 8.035 | 1.00 | 0.00 |
| ATOM | 472 | HA   | MET | 29 | -6.283 | -11.129 | 8.648 | 1.00 | 0.00 |
| ATOM | 473 | CB   | MET | 29 | -8.227 | -10.230 | 8.784 | 1.00 | 0.00 |
| ATOM | 474 | HB2  | MET | 29 | -9.038 | -9.970  | 8.105 | 1.00 | 0.00 |
| ATOM | 475 | HB3  | MET | 29 | -8.623 | -10.809 | 9.618 | 1.00 | 0.00 |
| ATOM | 476 | CG   | MET | 29 | -7.578 | -8.951  | 9.315 | 1.00 | 0.00 |
| ATOM | 477 | HG2  | MET | 29 | -7.198 | -8.355  | 8.486 | 1.00 | 0.00 |

|      |     |         |    |         |         |        |      |      |
|------|-----|---------|----|---------|---------|--------|------|------|
| ATOM | 478 | HG3 MET | 29 | -8.309  | -8.369  | 9.876  | 1.00 | 0.00 |
| ATOM | 479 | SD MET  | 29 | -6.205  | -9.393  | 10.408 | 1.00 | 0.00 |
| ATOM | 480 | CE MET  | 29 | -7.165  | -10.344 | 11.615 | 1.00 | 0.00 |
| ATOM | 481 | HE1 MET | 29 | -7.647  | -11.184 | 11.116 | 1.00 | 0.00 |
| ATOM | 482 | HE2 MET | 29 | -6.501  | -10.718 | 12.395 | 1.00 | 0.00 |
| ATOM | 483 | HE3 MET | 29 | -7.924  | -9.703  | 12.063 | 1.00 | 0.00 |
| ATOM | 484 | C MET   | 29 | -7.714  | -12.480 | 7.830  | 1.00 | 0.00 |
| ATOM | 485 | O MET   | 29 | -7.169  | -13.436 | 8.379  | 1.00 | 0.00 |
| ATOM | 486 | N GLU   | 30 | -8.767  | -12.617 | 7.024  | 1.00 | 0.00 |
| ATOM | 487 | H GLU   | 30 | -9.213  | -11.816 | 6.602  | 1.00 | 0.00 |
| ATOM | 488 | CA GLU  | 30 | -9.325  | -13.944 | 6.756  | 1.00 | 0.00 |
| ATOM | 489 | HA GLU  | 30 | -9.532  | -14.454 | 7.697  | 1.00 | 0.00 |
| ATOM | 490 | CB GLU  | 30 | -10.631 | -13.829 | 5.963  | 1.00 | 0.00 |
| ATOM | 491 | HB2 GLU | 30 | -10.465 | -13.211 | 5.081  | 1.00 | 0.00 |
| ATOM | 492 | HB3 GLU | 30 | -10.954 | -14.823 | 5.654  | 1.00 | 0.00 |
| ATOM | 493 | CG GLU  | 30 | -11.713 | -13.190 | 6.838  | 1.00 | 0.00 |
| ATOM | 494 | HG2 GLU | 30 | -12.694 | -13.541 | 6.519  | 1.00 | 0.00 |
| ATOM | 495 | HG3 GLU | 30 | -11.543 | -13.481 | 7.875  | 1.00 | 0.00 |
| ATOM | 496 | CD GLU  | 30 | -11.654 | -11.671 | 6.721  | 1.00 | 0.00 |
| ATOM | 497 | OE1 GLU | 30 | -11.795 | -11.176 | 5.614  | 1.00 | 0.00 |
| ATOM | 498 | OE2 GLU | 30 | -11.477 | -11.024 | 7.741  | 1.00 | 0.00 |
| ATOM | 499 | C GLU   | 30 | -8.326  | -14.796 | 5.974  | 1.00 | 0.00 |

|      |     |     |     |    |        |         |        |      |      |
|------|-----|-----|-----|----|--------|---------|--------|------|------|
| ATOM | 500 | O   | GLU | 30 | -8.143 | -15.981 | 6.251  | 1.00 | 0.00 |
| ATOM | 501 | N   | GLU | 31 | -7.692 | -14.166 | 4.987  | 1.00 | 0.00 |
| ATOM | 502 | H   | GLU | 31 | -7.913 | -13.200 | 4.796  | 1.00 | 0.00 |
| ATOM | 503 | CA  | GLU | 31 | -6.710 | -14.834 | 4.135  | 1.00 | 0.00 |
| ATOM | 504 | HA  | GLU | 31 | -7.120 | -15.766 | 3.745  | 1.00 | 0.00 |
| ATOM | 505 | CB  | GLU | 31 | -6.350 | -13.925 | 2.954  | 1.00 | 0.00 |
| ATOM | 506 | HB2 | GLU | 31 | -7.258 | -13.464 | 2.567  | 1.00 | 0.00 |
| ATOM | 507 | HB3 | GLU | 31 | -5.666 | -13.148 | 3.295  | 1.00 | 0.00 |
| ATOM | 508 | CG  | GLU | 31 | -5.679 | -14.745 | 1.844  | 1.00 | 0.00 |
| ATOM | 509 | HG2 | GLU | 31 | -4.821 | -15.271 | 2.262  | 1.00 | 0.00 |
| ATOM | 510 | HG3 | GLU | 31 | -6.396 | -15.470 | 1.458  | 1.00 | 0.00 |
| ATOM | 511 | CD  | GLU | 31 | -5.213 | -13.833 | 0.706  | 1.00 | 0.00 |
| ATOM | 512 | OE1 | GLU | 31 | -5.354 | -12.625 | 0.832  | 1.00 | 0.00 |
| ATOM | 513 | OE2 | GLU | 31 | -4.719 | -14.359 | -0.279 | 1.00 | 0.00 |
| ATOM | 514 | C   | GLU | 31 | -5.445 | -15.198 | 4.920  | 1.00 | 0.00 |
| ATOM | 515 | O   | GLU | 31 | -4.539 | -15.824 | 4.378  | 1.00 | 0.00 |
| ATOM | 516 | N   | SER | 32 | -5.384 | -14.792 | 6.190  | 1.00 | 0.00 |
| ATOM | 517 | H   | SER | 32 | -6.144 | -14.259 | 6.588  | 1.00 | 0.00 |
| ATOM | 518 | CA  | SER | 32 | -4.216 | -15.071 | 7.032  | 1.00 | 0.00 |
| ATOM | 519 | HA  | SER | 32 | -3.389 | -14.419 | 6.751  | 1.00 | 0.00 |
| ATOM | 520 | CB  | SER | 32 | -4.557 | -14.822 | 8.501  | 1.00 | 0.00 |
| ATOM | 521 | HB2 | SER | 32 | -3.673 | -14.997 | 9.115  | 1.00 | 0.00 |

|      |     |      |     |    |        |         |       |      |      |
|------|-----|------|-----|----|--------|---------|-------|------|------|
| ATOM | 522 | HB3  | SER | 32 | -4.889 | -13.792 | 8.629 | 1.00 | 0.00 |
| ATOM | 523 | OG   | SER | 32 | -5.595 | -15.708 | 8.901 | 1.00 | 0.00 |
| ATOM | 524 | HG   | SER | 32 | -5.810 | -15.553 | 9.824 | 1.00 | 0.00 |
| ATOM | 525 | C    | SER | 32 | -3.747 | -16.512 | 6.851 | 1.00 | 0.00 |
| ATOM | 526 | O    | SER | 32 | -2.589 | -16.834 | 7.116 | 1.00 | 0.00 |
| ATOM | 527 | N    | THR | 33 | -4.655 | -17.370 | 6.399 | 1.00 | 0.00 |
| ATOM | 528 | H    | THR | 33 | -5.604 | -17.066 | 6.237 | 1.00 | 0.00 |
| ATOM | 529 | CA   | THR | 33 | -4.327 | -18.768 | 6.156 | 1.00 | 0.00 |
| ATOM | 530 | HA   | THR | 33 | -3.695 | -19.153 | 6.957 | 1.00 | 0.00 |
| ATOM | 531 | CB   | THR | 33 | -5.614 | -19.599 | 6.106 | 1.00 | 0.00 |
| ATOM | 532 | HB   | THR | 33 | -5.370 | -20.630 | 5.847 | 1.00 | 0.00 |
| ATOM | 533 | CG2  | THR | 33 | -6.302 | -19.566 | 7.473 | 1.00 | 0.00 |
| ATOM | 534 | HG21 | THR | 33 | -6.547 | -18.536 | 7.733 | 1.00 | 0.00 |
| ATOM | 535 | HG22 | THR | 33 | -7.216 | -20.158 | 7.435 | 1.00 | 0.00 |
| ATOM | 536 | HG23 | THR | 33 | -5.633 | -19.981 | 8.227 | 1.00 | 0.00 |
| ATOM | 537 | OG1  | THR | 33 | -6.488 | -19.059 | 5.123 | 1.00 | 0.00 |
| ATOM | 538 | HG1  | THR | 33 | -7.294 | -19.579 | 5.092 | 1.00 | 0.00 |
| ATOM | 539 | C    | THR | 33 | -3.550 | -18.942 | 4.839 | 1.00 | 0.00 |
| ATOM | 540 | O    | THR | 33 | -2.443 | -19.480 | 4.824 | 1.00 | 0.00 |
| ATOM | 541 | N    | TYR | 34 | -4.179 | -18.521 | 3.732 | 1.00 | 0.00 |
| ATOM | 542 | H    | TYR | 34 | -5.101 | -18.118 | 3.816 | 1.00 | 0.00 |
| ATOM | 543 | CA   | TYR | 34 | -3.599 | -18.664 | 2.385 | 1.00 | 0.00 |

|      |     |     |     |    |        |         |       |      |      |
|------|-----|-----|-----|----|--------|---------|-------|------|------|
| ATOM | 544 | HA  | TYR | 34 | -2.812 | -19.419 | 2.388 | 1.00 | 0.00 |
| ATOM | 545 | CB  | TYR | 34 | -4.694 | -19.102 | 1.408 | 1.00 | 0.00 |
| ATOM | 546 | HB2 | TYR | 34 | -5.463 | -18.332 | 1.352 | 1.00 | 0.00 |
| ATOM | 547 | HB3 | TYR | 34 | -4.257 | -19.251 | 0.421 | 1.00 | 0.00 |
| ATOM | 548 | CG  | TYR | 34 | -5.311 | -20.396 | 1.886 | 1.00 | 0.00 |
| ATOM | 549 | CD1 | TYR | 34 | -4.633 | -21.607 | 1.699 | 1.00 | 0.00 |
| ATOM | 550 | HD1 | TYR | 34 | -3.660 | -21.617 | 1.207 | 1.00 | 0.00 |
| ATOM | 551 | CE1 | TYR | 34 | -5.204 | -22.805 | 2.144 | 1.00 | 0.00 |
| ATOM | 552 | HE1 | TYR | 34 | -4.676 | -23.748 | 1.998 | 1.00 | 0.00 |
| ATOM | 553 | CZ  | TYR | 34 | -6.453 | -22.793 | 2.777 | 1.00 | 0.00 |
| ATOM | 554 | OH  | TYR | 34 | -7.015 | -23.974 | 3.215 | 1.00 | 0.00 |
| ATOM | 555 | HH  | TYR | 34 | -6.465 | -24.741 | 3.035 | 1.00 | 0.00 |
| ATOM | 556 | CE2 | TYR | 34 | -7.130 | -21.582 | 2.964 | 1.00 | 0.00 |
| ATOM | 557 | HE2 | TYR | 34 | -8.102 | -21.573 | 3.457 | 1.00 | 0.00 |
| ATOM | 558 | CD2 | TYR | 34 | -6.560 | -20.385 | 2.520 | 1.00 | 0.00 |
| ATOM | 559 | HD2 | TYR | 34 | -7.087 | -19.443 | 2.667 | 1.00 | 0.00 |
| ATOM | 560 | C   | TYR | 34 | -2.934 | -17.386 | 1.844 | 1.00 | 0.00 |
| ATOM | 561 | O   | TYR | 34 | -2.550 | -17.354 | 0.674 | 1.00 | 0.00 |
| ATOM | 562 | N   | GLN | 35 | -2.844 | -16.332 | 2.658 | 1.00 | 0.00 |
| ATOM | 563 | H   | GLN | 35 | -3.199 | -16.388 | 3.602 | 1.00 | 0.00 |
| ATOM | 564 | CA  | GLN | 35 | -2.264 | -15.052 | 2.203 | 1.00 | 0.00 |
| ATOM | 565 | HA  | GLN | 35 | -3.034 | -14.467 | 1.702 | 1.00 | 0.00 |

|      |     |      |     |    |        |         |        |      |      |
|------|-----|------|-----|----|--------|---------|--------|------|------|
| ATOM | 566 | CB   | GLN | 35 | -1.712 | -14.233 | 3.376  | 1.00 | 0.00 |
| ATOM | 567 | HB2  | GLN | 35 | -1.507 | -13.219 | 3.034  | 1.00 | 0.00 |
| ATOM | 568 | HB3  | GLN | 35 | -2.458 | -14.205 | 4.171  | 1.00 | 0.00 |
| ATOM | 569 | CG   | GLN | 35 | -0.417 | -14.863 | 3.912  | 1.00 | 0.00 |
| ATOM | 570 | HG2  | GLN | 35 | 0.303  | -14.991 | 3.103  | 1.00 | 0.00 |
| ATOM | 571 | HG3  | GLN | 35 | 0.013  | -14.222 | 4.682  | 1.00 | 0.00 |
| ATOM | 572 | CD   | GLN | 35 | -0.709 | -16.226 | 4.522  | 1.00 | 0.00 |
| ATOM | 573 | OE1  | GLN | 35 | -1.912 | -16.484 | 4.939  | 1.00 | 0.00 |
| ATOM | 574 | NE2  | GLN | 35 | 0.177  | -17.074 | 4.615  | 1.00 | 0.00 |
| ATOM | 575 | HE21 | GLN | 35 | -0.031 | -17.975 | 5.022  | 1.00 | 0.00 |
| ATOM | 576 | HE22 | GLN | 35 | 1.108  | -16.866 | 4.284  | 1.00 | 0.00 |
| ATOM | 577 | C    | GLN | 35 | -1.140 | -15.235 | 1.194  | 1.00 | 0.00 |
| ATOM | 578 | O    | GLN | 35 | -0.948 | -14.379 | 0.329  | 1.00 | 0.00 |
| ATOM | 579 | N    | THR | 36 | -0.392 | -16.329 | 1.296  | 1.00 | 0.00 |
| ATOM | 580 | H    | THR | 36 | -0.547 | -17.022 | 2.014  | 1.00 | 0.00 |
| ATOM | 581 | CA   | THR | 36 | 0.698  | -16.539 | 0.361  | 1.00 | 0.00 |
| ATOM | 582 | HA   | THR | 36 | 1.421  | -15.727 | 0.440  | 1.00 | 0.00 |
| ATOM | 583 | CB   | THR | 36 | 1.410  | -17.860 | 0.671  | 1.00 | 0.00 |
| ATOM | 584 | HB   | THR | 36 | 0.734  | -18.691 | 0.469  | 1.00 | 0.00 |
| ATOM | 585 | CG2  | THR | 36 | 2.658  | -17.993 | -0.206 | 1.00 | 0.00 |
| ATOM | 586 | HG21 | THR | 36 | 3.335  | -17.163 | -0.004 | 1.00 | 0.00 |
| ATOM | 587 | HG22 | THR | 36 | 3.162  | -18.934 | 0.018  | 1.00 | 0.00 |

|      |     |          |    |        |         |        |      |      |
|------|-----|----------|----|--------|---------|--------|------|------|
| ATOM | 588 | HG23 THR | 36 | 2.368  | -17.978 | -1.256 | 1.00 | 0.00 |
| ATOM | 589 | OG1 THR  | 36 | 1.788  | -17.880 | 2.040  | 1.00 | 0.00 |
| ATOM | 590 | HG1 THR  | 36 | 2.235  | -18.707 | 2.237  | 1.00 | 0.00 |
| ATOM | 591 | C THR    | 36 | 0.136  | -16.568 | -1.054 | 1.00 | 0.00 |
| ATOM | 592 | O THR    | 36 | -0.524 | -17.525 | -1.458 | 1.00 | 0.00 |
| ATOM | 593 | N MET    | 37 | 0.396  | -15.492 | -1.788 | 1.00 | 0.00 |
| ATOM | 594 | H MET    | 37 | 0.925  | -14.727 | -1.394 | 1.00 | 0.00 |
| ATOM | 595 | CA MET   | 37 | -0.091 | -15.363 | -3.158 | 1.00 | 0.00 |
| ATOM | 596 | HA MET   | 37 | -1.177 | -15.447 | -3.180 | 1.00 | 0.00 |
| ATOM | 597 | CB MET   | 37 | 0.306  | -13.995 | -3.720 | 1.00 | 0.00 |
| ATOM | 598 | HB2 MET  | 37 | 1.383  | -13.859 | -3.615 | 1.00 | 0.00 |
| ATOM | 599 | HB3 MET  | 37 | 0.035  | -13.944 | -4.774 | 1.00 | 0.00 |
| ATOM | 600 | CG MET   | 37 | -0.426 | -12.890 | -2.951 | 1.00 | 0.00 |
| ATOM | 601 | HG2 MET  | 37 | -0.413 | -13.114 | -1.884 | 1.00 | 0.00 |
| ATOM | 602 | HG3 MET  | 37 | 0.065  | -11.933 | -3.126 | 1.00 | 0.00 |
| ATOM | 603 | SD MET   | 37 | -2.143 | -12.792 | -3.519 | 1.00 | 0.00 |
| ATOM | 604 | CE MET   | 37 | -1.863 | -11.663 | -4.905 | 1.00 | 0.00 |
| ATOM | 605 | HE1 MET  | 37 | -1.167 | -12.118 | -5.610 | 1.00 | 0.00 |
| ATOM | 606 | HE2 MET  | 37 | -2.809 | -11.462 | -5.407 | 1.00 | 0.00 |
| ATOM | 607 | HE3 MET  | 37 | -1.444 | -10.728 | -4.533 | 1.00 | 0.00 |
| ATOM | 608 | C MET    | 37 | 0.473  | -16.468 | -4.051 | 1.00 | 0.00 |
| ATOM | 609 | O MET    | 37 | 1.679  | -16.524 | -4.292 | 1.00 | 0.00 |



|      |     |     |     |    |        |         |         |      |      |
|------|-----|-----|-----|----|--------|---------|---------|------|------|
| ATOM | 610 | N   | PRO | 38 | -0.375 | -17.335 | -4.553  | 1.00 | 0.00 |
| ATOM | 611 | CD  | PRO | 38 | -1.832 | -17.353 | -4.325  | 1.00 | 0.00 |
| ATOM | 612 | HD2 | PRO | 38 | -2.269 | -16.451 | -4.751  | 1.00 | 0.00 |
| ATOM | 613 | HD3 | PRO | 38 | -2.023 | -17.378 | -3.252  | 1.00 | 0.00 |
| ATOM | 614 | CG  | PRO | 38 | -2.306 | -18.629 | -5.033  | 1.00 | 0.00 |
| ATOM | 615 | HG2 | PRO | 38 | -2.814 | -18.354 | -5.957  | 1.00 | 0.00 |
| ATOM | 616 | HG3 | PRO | 38 | -3.000 | -19.160 | -4.381  | 1.00 | 0.00 |
| ATOM | 617 | CB  | PRO | 38 | -1.091 | -19.455 | -5.303  | 1.00 | 0.00 |
| ATOM | 618 | HB2 | PRO | 38 | -1.242 | -19.982 | -6.245  | 1.00 | 0.00 |
| ATOM | 619 | HB3 | PRO | 38 | -0.852 | -20.175 | -4.520  | 1.00 | 0.00 |
| ATOM | 620 | CA  | PRO | 38 | 0.045  | -18.447 | -5.448  | 1.00 | 0.00 |
| ATOM | 621 | HA  | PRO | 38 | 1.005  | -18.828 | -5.099  | 1.00 | 0.00 |
| ATOM | 622 | C   | PRO | 38 | 0.179  | -17.981 | -6.895  | 1.00 | 0.00 |
| ATOM | 623 | O   | PRO | 38 | -0.587 | -17.132 | -7.353  | 1.00 | 0.00 |
| ATOM | 624 | N   | ARG | 39 | 1.149  | -18.541 | -7.611  | 1.00 | 0.00 |
| ATOM | 625 | H   | ARG | 39 | 1.745  | -19.252 | -7.211  | 1.00 | 0.00 |
| ATOM | 626 | CA  | ARG | 39 | 1.358  | -18.167 | -9.007  | 1.00 | 0.00 |
| ATOM | 627 | HA  | ARG | 39 | 1.577  | -17.102 | -9.074  | 1.00 | 0.00 |
| ATOM | 628 | CB  | ARG | 39 | 2.528  | -18.943 | -9.600  | 1.00 | 0.00 |
| ATOM | 629 | HB2 | ARG | 39 | 2.262  | -19.998 | -9.668  | 1.00 | 0.00 |
| ATOM | 630 | HB3 | ARG | 39 | 2.747  | -18.559 | -10.596 | 1.00 | 0.00 |
| ATOM | 631 | CG  | ARG | 39 | 3.765  | -18.786 | -8.710  | 1.00 | 0.00 |

|      |     |      |     |    |        |         |         |      |      |
|------|-----|------|-----|----|--------|---------|---------|------|------|
| ATOM | 632 | HG2  | ARG | 39 | 3.986  | -17.727 | -8.579  | 1.00 | 0.00 |
| ATOM | 633 | HG3  | ARG | 39 | 3.573  | -19.240 | -7.737  | 1.00 | 0.00 |
| ATOM | 634 | CD   | ARG | 39 | 4.961  | -19.479 | -9.368  | 1.00 | 0.00 |
| ATOM | 635 | HD2  | ARG | 39 | 4.694  | -20.501 | -9.638  | 1.00 | 0.00 |
| ATOM | 636 | HD3  | ARG | 39 | 5.259  | -18.933 | -10.263 | 1.00 | 0.00 |
| ATOM | 637 | NE   | ARG | 39 | 6.093  | -19.520 | -8.447  | 1.00 | 0.00 |
| ATOM | 638 | HE   | ARG | 39 | 6.857  | -18.868 | -8.554  | 1.00 | 0.00 |
| ATOM | 639 | CZ   | ARG | 39 | 6.149  | -20.407 | -7.453  | 1.00 | 0.00 |
| ATOM | 640 | NH1  | ARG | 39 | 5.179  | -21.264 | -7.282  | 1.00 | 0.00 |
| ATOM | 641 | HH11 | ARG | 39 | 4.385  | -21.254 | -7.905  | 1.00 | 0.00 |
| ATOM | 642 | HH12 | ARG | 39 | 5.228  | -21.933 | -6.527  | 1.00 | 0.00 |
| ATOM | 643 | NH2  | ARG | 39 | 7.177  | -20.417 | -6.649  | 1.00 | 0.00 |
| ATOM | 644 | HH21 | ARG | 39 | 7.926  | -19.753 | -6.783  | 1.00 | 0.00 |
| ATOM | 645 | HH22 | ARG | 39 | 7.219  | -21.089 | -5.896  | 1.00 | 0.00 |
| ATOM | 646 | C    | ARG | 39 | 0.126  | -18.508 | -9.821  | 1.00 | 0.00 |
| ATOM | 647 | O    | ARG | 39 | -0.276 | -17.757 | -10.710 | 1.00 | 0.00 |
| ATOM | 648 | N    | ARG | 40 | -0.464 | -19.662 | -9.514  | 1.00 | 0.00 |
| ATOM | 649 | H    | ARG | 40 | -0.086 | -20.262 | -8.794  | 1.00 | 0.00 |
| ATOM | 650 | CA   | ARG | 40 | -1.641 | -20.108 | -10.231 | 1.00 | 0.00 |
| ATOM | 651 | HA   | ARG | 40 | -1.472 | -20.032 | -11.305 | 1.00 | 0.00 |
| ATOM | 652 | CB   | ARG | 40 | -1.952 | -21.566 | -9.888  | 1.00 | 0.00 |
| ATOM | 653 | HB2  | ARG | 40 | -1.970 | -21.689 | -8.805  | 1.00 | 0.00 |

|      |     |      |     |    |        |         |         |      |      |
|------|-----|------|-----|----|--------|---------|---------|------|------|
| ATOM | 654 | HB3  | ARG | 40 | -2.923 | -21.838 | -10.300 | 1.00 | 0.00 |
| ATOM | 655 | CG   | ARG | 40 | -0.873 | -22.472 | -10.486 | 1.00 | 0.00 |
| ATOM | 656 | HG2  | ARG | 40 | 0.109  | -22.045 | -10.283 | 1.00 | 0.00 |
| ATOM | 657 | HG3  | ARG | 40 | -0.939 | -23.460 | -10.030 | 1.00 | 0.00 |
| ATOM | 658 | CD   | ARG | 40 | -1.074 | -22.594 | -12.001 | 1.00 | 0.00 |
| ATOM | 659 | HD2  | ARG | 40 | -1.060 | -21.604 | -12.456 | 1.00 | 0.00 |
| ATOM | 660 | HD3  | ARG | 40 | -0.278 | -23.202 | -12.431 | 1.00 | 0.00 |
| ATOM | 661 | NE   | ARG | 40 | -2.357 | -23.227 | -12.295 | 1.00 | 0.00 |
| ATOM | 662 | HE   | ARG | 40 | -3.150 | -22.661 | -12.558 | 1.00 | 0.00 |
| ATOM | 663 | CZ   | ARG | 40 | -2.514 | -24.548 | -12.225 | 1.00 | 0.00 |
| ATOM | 664 | NH1  | ARG | 40 | -1.512 | -25.313 | -11.883 | 1.00 | 0.00 |
| ATOM | 665 | HH11 | ARG | 40 | -0.615 | -24.901 | -11.671 | 1.00 | 0.00 |
| ATOM | 666 | HH12 | ARG | 40 | -1.639 | -26.314 | -11.832 | 1.00 | 0.00 |
| ATOM | 667 | NH2  | ARG | 40 | -3.674 | -25.080 | -12.499 | 1.00 | 0.00 |
| ATOM | 668 | HH21 | ARG | 40 | -4.448 | -24.488 | -12.763 | 1.00 | 0.00 |
| ATOM | 669 | HH22 | ARG | 40 | -3.792 | -26.082 | -12.445 | 1.00 | 0.00 |
| ATOM | 670 | C    | ARG | 40 | -2.826 | -19.230 | -9.890  | 1.00 | 0.00 |
| ATOM | 671 | O    | ARG | 40 | -3.472 | -19.393 | -8.853  | 1.00 | 0.00 |
| ATOM | 672 | N    | GLY | 41 | -3.095 | -18.306 | -10.791 | 1.00 | 0.00 |
| ATOM | 673 | H    | GLY | 41 | -2.520 | -18.230 | -11.618 | 1.00 | 0.00 |
| ATOM | 674 | CA   | GLY | 41 | -4.211 | -17.375 | -10.634 | 1.00 | 0.00 |
| ATOM | 675 | HA2  | GLY | 41 | -4.148 | -16.614 | -11.411 | 1.00 | 0.00 |

|      |     |     |     |    |        |         |         |      |      |
|------|-----|-----|-----|----|--------|---------|---------|------|------|
| ATOM | 676 | HA3 | GLY | 41 | -5.146 | -17.924 | -10.739 | 1.00 | 0.00 |
| ATOM | 677 | C   | GLY | 41 | -4.185 | -16.694 | -9.268  | 1.00 | 0.00 |
| ATOM | 678 | O   | GLY | 41 | -4.841 | -17.146 | -8.328  | 1.00 | 0.00 |
| ATOM | 679 | N   | MET | 42 | -3.429 | -15.601 | -9.168  | 1.00 | 0.00 |
| ATOM | 680 | H   | MET | 42 | -2.896 | -15.276 | -9.962  | 1.00 | 0.00 |
| ATOM | 681 | CA  | MET | 42 | -3.326 | -14.857 | -7.912  | 1.00 | 0.00 |
| ATOM | 682 | HA  | MET | 42 | -2.880 | -15.485 | -7.140  | 1.00 | 0.00 |
| ATOM | 683 | CB  | MET | 42 | -2.441 | -13.622 | -8.110  | 1.00 | 0.00 |
| ATOM | 684 | HB2 | MET | 42 | -2.815 | -13.039 | -8.951  | 1.00 | 0.00 |
| ATOM | 685 | HB3 | MET | 42 | -2.463 | -13.012 | -7.207  | 1.00 | 0.00 |
| ATOM | 686 | CG  | MET | 42 | -1.002 | -14.060 | -8.394  | 1.00 | 0.00 |
| ATOM | 687 | HG2 | MET | 42 | -0.644 | -14.699 | -7.586  | 1.00 | 0.00 |
| ATOM | 688 | HG3 | MET | 42 | -0.962 | -14.609 | -9.335  | 1.00 | 0.00 |
| ATOM | 689 | SD  | MET | 42 | 0.060  | -12.600 | -8.512  | 1.00 | 0.00 |
| ATOM | 690 | CE  | MET | 42 | 1.587  | -13.463 | -8.959  | 1.00 | 0.00 |
| ATOM | 691 | HE1 | MET | 42 | 1.439  | -14.005 | -9.893  | 1.00 | 0.00 |
| ATOM | 692 | HE2 | MET | 42 | 2.392  | -12.738 | -9.084  | 1.00 | 0.00 |
| ATOM | 693 | HE3 | MET | 42 | 1.852  | -14.167 | -8.169  | 1.00 | 0.00 |
| ATOM | 694 | C   | MET | 42 | -4.709 | -14.423 | -7.427  | 1.00 | 0.00 |
| ATOM | 695 | O   | MET | 42 | -5.702 | -14.569 | -8.141  | 1.00 | 0.00 |
| ATOM | 696 | N   | GLU | 43 | -4.767 | -13.891 | -6.207  | 1.00 | 0.00 |
| ATOM | 697 | H   | GLU | 43 | -3.933 | -13.804 | -5.643  | 1.00 | 0.00 |

|      |     |     |     |    |         |         |        |      |      |
|------|-----|-----|-----|----|---------|---------|--------|------|------|
| ATOM | 698 | CA  | GLU | 43 | -6.037  | -13.446 | -5.639 | 1.00 | 0.00 |
| ATOM | 699 | HA  | GLU | 43 | -6.785  | -14.233 | -5.735 | 1.00 | 0.00 |
| ATOM | 700 | CB  | GLU | 43 | -5.860  | -13.118 | -4.152 | 1.00 | 0.00 |
| ATOM | 701 | HB2 | GLU | 43 | -5.263  | -13.897 | -3.677 | 1.00 | 0.00 |
| ATOM | 702 | HB3 | GLU | 43 | -5.352  | -12.159 | -4.049 | 1.00 | 0.00 |
| ATOM | 703 | CG  | GLU | 43 | -7.233  | -13.044 | -3.476 | 1.00 | 0.00 |
| ATOM | 704 | HG2 | GLU | 43 | -7.815  | -12.238 | -3.921 | 1.00 | 0.00 |
| ATOM | 705 | HG3 | GLU | 43 | -7.750  | -13.992 | -3.628 | 1.00 | 0.00 |
| ATOM | 706 | CD  | GLU | 43 | -7.071  | -12.788 | -1.979 | 1.00 | 0.00 |
| ATOM | 707 | OE1 | GLU | 43 | -6.548  | -11.744 | -1.629 | 1.00 | 0.00 |
| ATOM | 708 | OE2 | GLU | 43 | -7.481  | -13.637 | -1.204 | 1.00 | 0.00 |
| ATOM | 709 | C   | GLU | 43 | -6.553  | -12.212 | -6.382 | 1.00 | 0.00 |
| ATOM | 710 | O   | GLU | 43 | -5.829  | -11.229 | -6.542 | 1.00 | 0.00 |
| ATOM | 711 | N   | PRO | 44 | -7.783  | -12.253 | -6.841 | 1.00 | 0.00 |
| ATOM | 712 | CD  | PRO | 44 | -8.715  | -13.383 | -6.691 | 1.00 | 0.00 |
| ATOM | 713 | HD2 | PRO | 44 | -8.707  | -13.719 | -5.654 | 1.00 | 0.00 |
| ATOM | 714 | HD3 | PRO | 44 | -8.395  | -14.200 | -7.339 | 1.00 | 0.00 |
| ATOM | 715 | CG  | PRO | 44 | -10.063 | -12.802 | -7.109 | 1.00 | 0.00 |
| ATOM | 716 | HG2 | PRO | 44 | -10.600 | -12.470 | -6.221 | 1.00 | 0.00 |
| ATOM | 717 | HG3 | PRO | 44 | -10.643 | -13.573 | -7.617 | 1.00 | 0.00 |
| ATOM | 718 | CB  | PRO | 44 | -9.771  | -11.663 | -8.027 | 1.00 | 0.00 |
| ATOM | 719 | HB2 | PRO | 44 | -10.533 | -10.894 | -7.900 | 1.00 | 0.00 |

|      |     |         |    |         |         |        |      |      |
|------|-----|---------|----|---------|---------|--------|------|------|
| ATOM | 720 | HB3 PRO | 44 | -9.733  | -11.969 | -9.072 | 1.00 | 0.00 |
| ATOM | 721 | CA PRO  | 44 | -8.405  | -11.119 | -7.592 | 1.00 | 0.00 |
| ATOM | 722 | HA PRO  | 44 | -7.768  | -10.894 | -8.447 | 1.00 | 0.00 |
| ATOM | 723 | C PRO   | 44 | -8.567  | -9.866  | -6.734 | 1.00 | 0.00 |
| ATOM | 724 | O PRO   | 44 | -8.619  | -8.752  | -7.259 | 1.00 | 0.00 |
| ATOM | 725 | N HIE   | 45 | -8.651  | -10.053 | -5.419 | 1.00 | 0.00 |
| ATOM | 726 | H HIE   | 45 | -8.623  | -10.984 | -5.029 | 1.00 | 0.00 |
| ATOM | 727 | CA HIE  | 45 | -8.813  | -8.924  | -4.506 | 1.00 | 0.00 |
| ATOM | 728 | HA HIE  | 45 | -9.786  | -8.459  | -4.659 | 1.00 | 0.00 |
| ATOM | 729 | CB HIE  | 45 | -8.722  | -9.402  | -3.054 | 1.00 | 0.00 |
| ATOM | 730 | HB2 HIE | 45 | -7.804  | -9.956  | -2.857 | 1.00 | 0.00 |
| ATOM | 731 | HB3 HIE | 45 | -8.807  | -8.578  | -2.346 | 1.00 | 0.00 |
| ATOM | 732 | CG HIE  | 45 | -9.862  | -10.340 | -2.762 | 1.00 | 0.00 |
| ATOM | 733 | ND1 HIE | 45 | -9.656  | -11.650 | -2.360 | 1.00 | 0.00 |
| ATOM | 734 | CE1 HIE | 45 | -10.864 | -12.216 | -2.187 | 1.00 | 0.00 |
| ATOM | 735 | HE1 HIE | 45 | -10.886 | -13.258 | -1.868 | 1.00 | 0.00 |
| ATOM | 736 | NE2 HIE | 45 | -11.854 | -11.359 | -2.449 | 1.00 | 0.00 |
| ATOM | 737 | HE2 HIE | 45 | -12.854 | -11.495 | -2.407 | 1.00 | 0.00 |
| ATOM | 738 | CD2 HIE | 45 | -11.224 | -10.174 | -2.812 | 1.00 | 0.00 |
| ATOM | 739 | HD2 HIE | 45 | -11.818 | -9.301  | -3.079 | 1.00 | 0.00 |
| ATOM | 740 | C HIE   | 45 | -7.741  | -7.868  | -4.765 | 1.00 | 0.00 |
| ATOM | 741 | O HIE   | 45 | -8.039  | -6.674  | -4.836 | 1.00 | 0.00 |

|      |     |     |     |    |        |        |        |      |      |
|------|-----|-----|-----|----|--------|--------|--------|------|------|
| ATOM | 742 | N   | MET | 46 | -6.497 | -8.317 | -4.916 | 1.00 | 0.00 |
| ATOM | 743 | H   | MET | 46 | -6.294 | -9.304 | -4.848 | 1.00 | 0.00 |
| ATOM | 744 | CA  | MET | 46 | -5.392 | -7.400 | -5.178 | 1.00 | 0.00 |
| ATOM | 745 | HA  | MET | 46 | -5.363 | -6.623 | -4.414 | 1.00 | 0.00 |
| ATOM | 746 | CB  | MET | 46 | -4.061 | -8.160 | -5.153 | 1.00 | 0.00 |
| ATOM | 747 | HB2 | MET | 46 | -4.034 | -8.860 | -5.988 | 1.00 | 0.00 |
| ATOM | 748 | HB3 | MET | 46 | -3.241 | -7.448 | -5.249 | 1.00 | 0.00 |
| ATOM | 749 | CG  | MET | 46 | -3.915 | -8.930 | -3.838 | 1.00 | 0.00 |
| ATOM | 750 | HG2 | MET | 46 | -4.633 | -9.750 | -3.813 | 1.00 | 0.00 |
| ATOM | 751 | HG3 | MET | 46 | -2.904 | -9.331 | -3.760 | 1.00 | 0.00 |
| ATOM | 752 | SD  | MET | 46 | -4.225 | -7.825 | -2.439 | 1.00 | 0.00 |
| ATOM | 753 | CE  | MET | 46 | -4.831 | -9.089 | -1.293 | 1.00 | 0.00 |
| ATOM | 754 | HE1 | MET | 46 | -4.054 | -9.838 | -1.133 | 1.00 | 0.00 |
| ATOM | 755 | HE2 | MET | 46 | -5.088 | -8.624 | -0.341 | 1.00 | 0.00 |
| ATOM | 756 | HE3 | MET | 46 | -5.715 | -9.568 | -1.714 | 1.00 | 0.00 |
| ATOM | 757 | C   | MET | 46 | -5.568 | -6.747 | -6.548 | 1.00 | 0.00 |
| ATOM | 758 | O   | MET | 46 | -5.353 | -5.546 | -6.712 | 1.00 | 0.00 |
| ATOM | 759 | N   | SER | 47 | -5.961 | -7.563 | -7.524 | 1.00 | 0.00 |
| ATOM | 760 | H   | SER | 47 | -6.100 | -8.545 | -7.329 | 1.00 | 0.00 |
| ATOM | 761 | CA  | SER | 47 | -6.169 | -7.092 | -8.891 | 1.00 | 0.00 |
| ATOM | 762 | HA  | SER | 47 | -5.241 | -6.684 | -9.292 | 1.00 | 0.00 |
| ATOM | 763 | CB  | SER | 47 | -6.615 | -8.256 | -9.778 | 1.00 | 0.00 |

|      |     |     |     |    |         |         |         |      |      |
|------|-----|-----|-----|----|---------|---------|---------|------|------|
| ATOM | 764 | HB2 | SER | 47 | -7.607  | -8.588  | -9.473  | 1.00 | 0.00 |
| ATOM | 765 | HB3 | SER | 47 | -6.644  | -7.932  | -10.818 | 1.00 | 0.00 |
| ATOM | 766 | OG  | SER | 47 | -5.694  | -9.330  | -9.643  | 1.00 | 0.00 |
| ATOM | 767 | HG  | SER | 47 | -5.972  | -10.062 | -10.199 | 1.00 | 0.00 |
| ATOM | 768 | C   | SER | 47 | -7.213  | -5.979  | -8.950  | 1.00 | 0.00 |
| ATOM | 769 | O   | SER | 47 | -7.130  | -5.086  | -9.793  | 1.00 | 0.00 |
| ATOM | 770 | N   | GLU | 48 | -8.204  | -6.048  | -8.065  | 1.00 | 0.00 |
| ATOM | 771 | H   | GLU | 48 | -8.252  | -6.810  | -7.403  | 1.00 | 0.00 |
| ATOM | 772 | CA  | GLU | 48 | -9.266  | -5.045  | -8.046  | 1.00 | 0.00 |
| ATOM | 773 | HA  | GLU | 48 | -9.830  | -5.080  | -8.977  | 1.00 | 0.00 |
| ATOM | 774 | CB  | GLU | 48 | -10.226 | -5.321  | -6.880  | 1.00 | 0.00 |
| ATOM | 775 | HB2 | GLU | 48 | -10.050 | -6.328  | -6.500  | 1.00 | 0.00 |
| ATOM | 776 | HB3 | GLU | 48 | -10.045 | -4.597  | -6.086  | 1.00 | 0.00 |
| ATOM | 777 | CG  | GLU | 48 | -11.679 | -5.202  | -7.359  | 1.00 | 0.00 |
| ATOM | 778 | HG2 | GLU | 48 | -11.727 | -5.458  | -8.417  | 1.00 | 0.00 |
| ATOM | 779 | HG3 | GLU | 48 | -12.293 | -5.899  | -6.789  | 1.00 | 0.00 |
| ATOM | 780 | CD  | GLU | 48 | -12.200 | -3.780  | -7.155  | 1.00 | 0.00 |
| ATOM | 781 | OE1 | GLU | 48 | -11.452 | -2.848  | -7.401  | 1.00 | 0.00 |
| ATOM | 782 | OE2 | GLU | 48 | -13.346 | -3.643  | -6.758  | 1.00 | 0.00 |
| ATOM | 783 | C   | GLU | 48 | -8.678  | -3.641  | -7.912  | 1.00 | 0.00 |
| ATOM | 784 | O   | GLU | 48 | -8.967  | -2.760  | -8.723  | 1.00 | 0.00 |
| ATOM | 785 | N   | CYX | 49 | -7.845  | -3.443  | -6.894  | 1.00 | 0.00 |



|      |     |     |     |    |        |        |         |      |      |
|------|-----|-----|-----|----|--------|--------|---------|------|------|
| ATOM | 786 | H   | CYX | 49 | -7.655 | -4.183 | -6.233  | 1.00 | 0.00 |
| ATOM | 787 | CA  | CYX | 49 | -7.216 | -2.143 | -6.677  | 1.00 | 0.00 |
| ATOM | 788 | HA  | CYX | 49 | -7.970 | -1.357 | -6.697  | 1.00 | 0.00 |
| ATOM | 789 | CB  | CYX | 49 | -6.513 | -2.115 | -5.309  | 1.00 | 0.00 |
| ATOM | 790 | HB2 | CYX | 49 | -6.307 | -3.135 | -4.984  | 1.00 | 0.00 |
| ATOM | 791 | HB3 | CYX | 49 | -5.575 | -1.566 | -5.393  | 1.00 | 0.00 |
| ATOM | 792 | SG  | CYX | 49 | -7.581 | -1.288 | -4.102  | 1.00 | 0.00 |
| ATOM | 793 | C   | CYX | 49 | -6.210 | -1.835 | -7.788  | 1.00 | 0.00 |
| ATOM | 794 | O   | CYX | 49 | -6.009 | -0.675 | -8.141  | 1.00 | 0.00 |
| ATOM | 795 | N   | CYX | 50 | -5.581 | -2.883 | -8.326  | 1.00 | 0.00 |
| ATOM | 796 | H   | CYX | 50 | -5.777 | -3.815 | -7.987  | 1.00 | 0.00 |
| ATOM | 797 | CA  | CYX | 50 | -4.582 | -2.725 | -9.389  | 1.00 | 0.00 |
| ATOM | 798 | HA  | CYX | 50 | -3.694 | -2.229 | -8.996  | 1.00 | 0.00 |
| ATOM | 799 | CB  | CYX | 50 | -4.175 | -4.093 | -9.935  | 1.00 | 0.00 |
| ATOM | 800 | HB2 | CYX | 50 | -3.903 | -4.749 | -9.108  | 1.00 | 0.00 |
| ATOM | 801 | HB3 | CYX | 50 | -5.009 | -4.529 | -10.484 | 1.00 | 0.00 |
| ATOM | 802 | SG  | CYX | 50 | -2.783 | -3.898 | -11.080 | 1.00 | 0.00 |
| ATOM | 803 | C   | CYX | 50 | -5.095 | -1.872 | -10.546 | 1.00 | 0.00 |
| ATOM | 804 | O   | CYX | 50 | -4.373 | -1.019 | -11.063 | 1.00 | 0.00 |
| ATOM | 805 | N   | GLU | 51 | -6.331 | -2.121 | -10.966 | 1.00 | 0.00 |
| ATOM | 806 | H   | GLU | 51 | -6.884 | -2.850 | -10.538 | 1.00 | 0.00 |
| ATOM | 807 | CA  | GLU | 51 | -6.908 | -1.380 | -12.083 | 1.00 | 0.00 |

|      |     |     |     |    |        |        |         |      |      |
|------|-----|-----|-----|----|--------|--------|---------|------|------|
| ATOM | 808 | HA  | GLU | 51 | -6.309 | -1.531 | -12.981 | 1.00 | 0.00 |
| ATOM | 809 | CB  | GLU | 51 | -8.334 | -1.872 | -12.356 | 1.00 | 0.00 |
| ATOM | 810 | HB2 | GLU | 51 | -8.327 | -2.956 | -12.474 | 1.00 | 0.00 |
| ATOM | 811 | HB3 | GLU | 51 | -8.976 | -1.603 | -11.517 | 1.00 | 0.00 |
| ATOM | 812 | CG  | GLU | 51 | -8.868 | -1.221 | -13.639 | 1.00 | 0.00 |
| ATOM | 813 | HG2 | GLU | 51 | -9.915 | -1.495 | -13.769 | 1.00 | 0.00 |
| ATOM | 814 | HG3 | GLU | 51 | -8.785 | -0.139 | -13.543 | 1.00 | 0.00 |
| ATOM | 815 | CD  | GLU | 51 | -8.063 | -1.689 | -14.855 | 1.00 | 0.00 |
| ATOM | 816 | OE1 | GLU | 51 | -7.572 | -2.807 | -14.833 | 1.00 | 0.00 |
| ATOM | 817 | OE2 | GLU | 51 | -7.953 | -0.920 | -15.795 | 1.00 | 0.00 |
| ATOM | 818 | C   | GLU | 51 | -6.925 | 0.124  | -11.810 | 1.00 | 0.00 |
| ATOM | 819 | O   | GLU | 51 | -6.707 | 0.925  | -12.717 | 1.00 | 0.00 |
| ATOM | 820 | N   | GLN | 52 | -7.196 | 0.501  | -10.563 | 1.00 | 0.00 |
| ATOM | 821 | H   | GLN | 52 | -7.401 | -0.187 | -9.852  | 1.00 | 0.00 |
| ATOM | 822 | CA  | GLN | 52 | -7.251 | 1.915  | -10.195 | 1.00 | 0.00 |
| ATOM | 823 | HA  | GLN | 52 | -8.008 | 2.430  | -10.785 | 1.00 | 0.00 |
| ATOM | 824 | CB  | GLN | 52 | -7.614 | 2.042  | -8.718  | 1.00 | 0.00 |
| ATOM | 825 | HB2 | GLN | 52 | -6.856 | 1.547  | -8.110  | 1.00 | 0.00 |
| ATOM | 826 | HB3 | GLN | 52 | -7.669 | 3.095  | -8.443  | 1.00 | 0.00 |
| ATOM | 827 | CG  | GLN | 52 | -8.974 | 1.380  | -8.476  | 1.00 | 0.00 |
| ATOM | 828 | HG2 | GLN | 52 | -9.105 | 0.540  | -9.158  | 1.00 | 0.00 |
| ATOM | 829 | HG3 | GLN | 52 | -9.035 | 1.025  | -7.447  | 1.00 | 0.00 |

|      |     |      |     |    |         |        |         |      |      |
|------|-----|------|-----|----|---------|--------|---------|------|------|
| ATOM | 830 | CD   | GLN | 52 | -10.100 | 2.382  | -8.714  | 1.00 | 0.00 |
| ATOM | 831 | OE1  | GLN | 52 | -10.203 | 2.958  | -9.796  | 1.00 | 0.00 |
| ATOM | 832 | NE2  | GLN | 52 | -10.957 | 2.624  | -7.759  | 1.00 | 0.00 |
| ATOM | 833 | HE21 | GLN | 52 | -11.704 | 3.286  | -7.911  | 1.00 | 0.00 |
| ATOM | 834 | HE22 | GLN | 52 | -10.868 | 2.147  | -6.872  | 1.00 | 0.00 |
| ATOM | 835 | C    | GLN | 52 | -5.922  | 2.618  | -10.473 | 1.00 | 0.00 |
| ATOM | 836 | O    | GLN | 52 | -5.888  | 3.631  | -11.171 | 1.00 | 0.00 |
| ATOM | 837 | N    | LEU | 53 | -4.826  | 2.068  | -9.942  | 1.00 | 0.00 |
| ATOM | 838 | H    | LEU | 53 | -4.883  | 1.212  | -9.408  | 1.00 | 0.00 |
| ATOM | 839 | CA   | LEU | 53 | -3.503  | 2.658  | -10.171 | 1.00 | 0.00 |
| ATOM | 840 | HA   | LEU | 53 | -3.474  | 3.663  | -9.750  | 1.00 | 0.00 |
| ATOM | 841 | CB   | LEU | 53 | -2.403  | 1.818  | -9.508  | 1.00 | 0.00 |
| ATOM | 842 | HB2  | LEU | 53 | -2.237  | 0.939  | -10.131 | 1.00 | 0.00 |
| ATOM | 843 | HB3  | LEU | 53 | -1.488  | 2.409  | -9.465  | 1.00 | 0.00 |
| ATOM | 844 | CG   | LEU | 53 | -2.792  | 1.374  | -8.091  | 1.00 | 0.00 |
| ATOM | 845 | HG   | LEU | 53 | -1.895  | 1.379  | -7.470  | 1.00 | 0.00 |
| ATOM | 846 | CD1  | LEU | 53 | -3.847  | 2.306  | -7.474  | 1.00 | 0.00 |
| ATOM | 847 | HD11 | LEU | 53 | -4.744  | 2.301  | -8.093  | 1.00 | 0.00 |
| ATOM | 848 | HD12 | LEU | 53 | -4.096  | 1.959  | -6.471  | 1.00 | 0.00 |
| ATOM | 849 | HD13 | LEU | 53 | -3.449  | 3.319  | -7.419  | 1.00 | 0.00 |
| ATOM | 850 | CD2  | LEU | 53 | -3.347  | -0.047 | -8.178  | 1.00 | 0.00 |
| ATOM | 851 | HD21 | LEU | 53 | -2.584  | -0.712 | -8.584  | 1.00 | 0.00 |

|      |     |      |     |    |        |        |         |      |      |
|------|-----|------|-----|----|--------|--------|---------|------|------|
| ATOM | 852 | HD22 | LEU | 53 | -3.632 | -0.388 | -7.182  | 1.00 | 0.00 |
| ATOM | 853 | HD23 | LEU | 53 | -4.221 | -0.057 | -8.829  | 1.00 | 0.00 |
| ATOM | 854 | C    | LEU | 53 | -3.233 | 2.650  | -11.657 | 1.00 | 0.00 |
| ATOM | 855 | O    | LEU | 53 | -2.858 | 3.653  | -12.264 | 1.00 | 0.00 |
| ATOM | 856 | N    | GLU | 54 | -3.452 | 1.475  | -12.211 | 1.00 | 0.00 |
| ATOM | 857 | H    | GLU | 54 | -3.717 | 0.704  | -11.614 | 1.00 | 0.00 |
| ATOM | 858 | CA   | GLU | 54 | -3.278 | 1.220  | -13.619 | 1.00 | 0.00 |
| ATOM | 859 | HA   | GLU | 54 | -2.235 | 1.324  | -13.919 | 1.00 | 0.00 |
| ATOM | 860 | CB   | GLU | 54 | -3.714 | -0.221 | -13.864 | 1.00 | 0.00 |
| ATOM | 861 | HB2  | GLU | 54 | -3.006 | -0.891 | -13.375 | 1.00 | 0.00 |
| ATOM | 862 | HB3  | GLU | 54 | -4.706 | -0.367 | -13.436 | 1.00 | 0.00 |
| ATOM | 863 | CG   | GLU | 54 | -3.755 | -0.528 | -15.367 | 1.00 | 0.00 |
| ATOM | 864 | HG2  | GLU | 54 | -4.388 | 0.209  | -15.861 | 1.00 | 0.00 |
| ATOM | 865 | HG3  | GLU | 54 | -2.744 | -0.466 | -15.770 | 1.00 | 0.00 |
| ATOM | 866 | CD   | GLU | 54 | -4.317 | -1.931 | -15.614 | 1.00 | 0.00 |
| ATOM | 867 | OE1  | GLU | 54 | -4.634 | -2.611 | -14.650 | 1.00 | 0.00 |
| ATOM | 868 | OE2  | GLU | 54 | -4.421 | -2.306 | -16.771 | 1.00 | 0.00 |
| ATOM | 869 | C    | GLU | 54 | -4.077 | 2.219  | -14.457 | 1.00 | 0.00 |
| ATOM | 870 | O    | GLU | 54 | -3.657 | 2.601  | -15.550 | 1.00 | 0.00 |
| ATOM | 871 | N    | GLY | 55 | -5.216 | 2.654  | -13.923 | 1.00 | 0.00 |
| ATOM | 872 | H    | GLY | 55 | -5.518 | 2.312  | -13.022 | 1.00 | 0.00 |
| ATOM | 873 | CA   | GLY | 55 | -6.059 | 3.629  | -14.613 | 1.00 | 0.00 |

|      |     |     |     |    |        |        |         |      |      |
|------|-----|-----|-----|----|--------|--------|---------|------|------|
| ATOM | 874 | HA2 | GLY | 55 | -5.966 | 3.491  | -15.690 | 1.00 | 0.00 |
| ATOM | 875 | HA3 | GLY | 55 | -7.098 | 3.485  | -14.316 | 1.00 | 0.00 |
| ATOM | 876 | C   | GLY | 55 | -5.632 | 5.052  | -14.255 | 1.00 | 0.00 |
| ATOM | 877 | O   | GLY | 55 | -6.029 | 6.016  | -14.910 | 1.00 | 0.00 |
| ATOM | 878 | N   | MET | 56 | -4.816 | 5.166  | -13.209 | 1.00 | 0.00 |
| ATOM | 879 | H   | MET | 56 | -4.535 | 4.339  | -12.701 | 1.00 | 0.00 |
| ATOM | 880 | CA  | MET | 56 | -4.321 | 6.463  | -12.751 | 1.00 | 0.00 |
| ATOM | 881 | HA  | MET | 56 | -5.075 | 7.233  | -12.911 | 1.00 | 0.00 |
| ATOM | 882 | CB  | MET | 56 | -4.004 | 6.391  | -11.250 | 1.00 | 0.00 |
| ATOM | 883 | HB2 | MET | 56 | -4.920 | 6.173  | -10.700 | 1.00 | 0.00 |
| ATOM | 884 | HB3 | MET | 56 | -3.278 | 5.597  | -11.075 | 1.00 | 0.00 |
| ATOM | 885 | CG  | MET | 56 | -3.426 | 7.725  | -10.770 | 1.00 | 0.00 |
| ATOM | 886 | HG2 | MET | 56 | -3.045 | 7.616  | -9.754  | 1.00 | 0.00 |
| ATOM | 887 | HG3 | MET | 56 | -2.615 | 8.033  | -11.430 | 1.00 | 0.00 |
| ATOM | 888 | SD  | MET | 56 | -4.720 | 8.988  | -10.787 | 1.00 | 0.00 |
| ATOM | 889 | CE  | MET | 56 | -4.708 | 9.351  | -9.016  | 1.00 | 0.00 |
| ATOM | 890 | HE1 | MET | 56 | -3.719 | 9.704  | -8.723  | 1.00 | 0.00 |
| ATOM | 891 | HE2 | MET | 56 | -5.447 | 10.121 | -8.797  | 1.00 | 0.00 |
| ATOM | 892 | HE3 | MET | 56 | -4.950 | 8.446  | -8.457  | 1.00 | 0.00 |
| ATOM | 893 | C   | MET | 56 | -3.066 | 6.858  | -13.522 | 1.00 | 0.00 |
| ATOM | 894 | O   | MET | 56 | -2.223 | 6.010  | -13.824 | 1.00 | 0.00 |
| ATOM | 895 | N   | ASP | 57 | -2.942 | 8.150  | -13.835 | 1.00 | 0.00 |

|      |     |     |     |    |        |        |         |      |      |
|------|-----|-----|-----|----|--------|--------|---------|------|------|
| ATOM | 896 | H   | ASP | 57 | -3.665 | 8.811  | -13.588 | 1.00 | 0.00 |
| ATOM | 897 | CA  | ASP | 57 | -1.775 | 8.640  | -14.565 | 1.00 | 0.00 |
| ATOM | 898 | HA  | ASP | 57 | -1.768 | 8.229  | -15.575 | 1.00 | 0.00 |
| ATOM | 899 | CB  | ASP | 57 | -1.815 | 10.170 | -14.658 | 1.00 | 0.00 |
| ATOM | 900 | HB2 | ASP | 57 | -1.887 | 10.582 | -13.651 | 1.00 | 0.00 |
| ATOM | 901 | HB3 | ASP | 57 | -0.896 | 10.520 | -15.128 | 1.00 | 0.00 |
| ATOM | 902 | CG  | ASP | 57 | -3.018 | 10.629 | -15.485 | 1.00 | 0.00 |
| ATOM | 903 | OD1 | ASP | 57 | -3.583 | 9.812  | -16.196 | 1.00 | 0.00 |
| ATOM | 904 | OD2 | ASP | 57 | -3.357 | 11.798 | -15.395 | 1.00 | 0.00 |
| ATOM | 905 | C   | ASP | 57 | -0.492 | 8.198  | -13.865 | 1.00 | 0.00 |
| ATOM | 906 | O   | ASP | 57 | -0.445 | 8.114  | -12.638 | 1.00 | 0.00 |
| ATOM | 907 | N   | GLU | 58 | 0.540  | 7.904  | -14.651 | 1.00 | 0.00 |
| ATOM | 908 | H   | GLU | 58 | 0.455  | 7.968  | -15.655 | 1.00 | 0.00 |
| ATOM | 909 | CA  | GLU | 58 | 1.811  | 7.453  | -14.092 | 1.00 | 0.00 |
| ATOM | 910 | HA  | GLU | 58 | 1.686  | 6.486  | -13.605 | 1.00 | 0.00 |
| ATOM | 911 | CB  | GLU | 58 | 2.844  | 7.307  | -15.211 | 1.00 | 0.00 |
| ATOM | 912 | HB2 | GLU | 58 | 2.570  | 6.473  | -15.857 | 1.00 | 0.00 |
| ATOM | 913 | HB3 | GLU | 58 | 2.881  | 8.224  | -15.798 | 1.00 | 0.00 |
| ATOM | 914 | CG  | GLU | 58 | 4.216  | 7.042  | -14.594 | 1.00 | 0.00 |
| ATOM | 915 | HG2 | GLU | 58 | 4.482  | 7.877  | -13.946 | 1.00 | 0.00 |
| ATOM | 916 | HG3 | GLU | 58 | 4.175  | 6.125  | -14.005 | 1.00 | 0.00 |
| ATOM | 917 | CD  | GLU | 58 | 5.267  | 6.895  | -15.691 | 1.00 | 0.00 |

|      |     |     |     |    |        |        |         |      |      |
|------|-----|-----|-----|----|--------|--------|---------|------|------|
| ATOM | 918 | OE1 | GLU | 58 | 5.272  | 5.865  | -16.347 | 1.00 | 0.00 |
| ATOM | 919 | OE2 | GLU | 58 | 6.054  | 7.813  | -15.858 | 1.00 | 0.00 |
| ATOM | 920 | C   | GLU | 58 | 2.346  | 8.420  | -13.039 | 1.00 | 0.00 |
| ATOM | 921 | O   | GLU | 58 | 2.588  | 8.030  | -11.897 | 1.00 | 0.00 |
| ATOM | 922 | N   | SER | 59 | 2.533  | 9.677  | -13.427 | 1.00 | 0.00 |
| ATOM | 923 | H   | SER | 59 | 2.340  | 9.955  | -14.378 | 1.00 | 0.00 |
| ATOM | 924 | CA  | SER | 59 | 3.042  | 10.684 | -12.501 | 1.00 | 0.00 |
| ATOM | 925 | HA  | SER | 59 | 4.047  | 10.417 | -12.171 | 1.00 | 0.00 |
| ATOM | 926 | CB  | SER | 59 | 3.101  | 12.045 | -13.197 | 1.00 | 0.00 |
| ATOM | 927 | HB2 | SER | 59 | 2.095  | 12.357 | -13.476 | 1.00 | 0.00 |
| ATOM | 928 | HB3 | SER | 59 | 3.536  | 12.782 | -12.522 | 1.00 | 0.00 |
| ATOM | 929 | OG  | SER | 59 | 3.905  | 11.940 | -14.365 | 1.00 | 0.00 |
| ATOM | 930 | HG  | SER | 59 | 3.944  | 12.792 | -14.804 | 1.00 | 0.00 |
| ATOM | 931 | C   | SER | 59 | 2.145  | 10.773 | -11.273 | 1.00 | 0.00 |
| ATOM | 932 | O   | SER | 59 | 2.611  | 11.010 | -10.158 | 1.00 | 0.00 |
| ATOM | 933 | N   | CYX | 60 | 0.854  | 10.576 | -11.501 | 1.00 | 0.00 |
| ATOM | 934 | H   | CYX | 60 | 0.532  | 10.408 | -12.443 | 1.00 | 0.00 |
| ATOM | 935 | CA  | CYX | 60 | -0.137 | 10.628 | -10.428 | 1.00 | 0.00 |
| ATOM | 936 | HA  | CYX | 60 | 0.059  | 11.481 | -9.779  | 1.00 | 0.00 |
| ATOM | 937 | CB  | CYX | 60 | -1.540 | 10.775 | -11.020 | 1.00 | 0.00 |
| ATOM | 938 | HB2 | CYX | 60 | -1.763 | 9.910  | -11.644 | 1.00 | 0.00 |
| ATOM | 939 | HB3 | CYX | 60 | -2.270 | 10.838 | -10.213 | 1.00 | 0.00 |

|      |     |      |     |    |        |        |         |      |      |
|------|-----|------|-----|----|--------|--------|---------|------|------|
| ATOM | 940 | SG   | CYX | 60 | -1.619 | 12.287 | -12.011 | 1.00 | 0.00 |
| ATOM | 941 | C    | CYX | 60 | -0.074 | 9.375  | -9.562  | 1.00 | 0.00 |
| ATOM | 942 | O    | CYX | 60 | -0.480 | 9.390  | -8.399  | 1.00 | 0.00 |
| ATOM | 943 | N    | ARG | 61 | 0.413  | 8.286  | -10.149 | 1.00 | 0.00 |
| ATOM | 944 | H    | ARG | 61 | 0.719  | 8.323  | -11.111 | 1.00 | 0.00 |
| ATOM | 945 | CA   | ARG | 61 | 0.502  | 7.013  | -9.444  | 1.00 | 0.00 |
| ATOM | 946 | HA   | ARG | 61 | -0.483 | 6.700  | -9.098  | 1.00 | 0.00 |
| ATOM | 947 | CB   | ARG | 61 | 1.048  | 5.945  | -10.396 | 1.00 | 0.00 |
| ATOM | 948 | HB2  | ARG | 61 | 0.496  | 5.987  | -11.334 | 1.00 | 0.00 |
| ATOM | 949 | HB3  | ARG | 61 | 2.103  | 6.142  | -10.586 | 1.00 | 0.00 |
| ATOM | 950 | CG   | ARG | 61 | 0.893  | 4.553  | -9.775  | 1.00 | 0.00 |
| ATOM | 951 | HG2  | ARG | 61 | 1.364  | 4.535  | -8.792  | 1.00 | 0.00 |
| ATOM | 952 | HG3  | ARG | 61 | -0.165 | 4.312  | -9.675  | 1.00 | 0.00 |
| ATOM | 953 | CD   | ARG | 61 | 1.567  | 3.521  | -10.681 | 1.00 | 0.00 |
| ATOM | 954 | HD2  | ARG | 61 | 2.647  | 3.672  | -10.680 | 1.00 | 0.00 |
| ATOM | 955 | HD3  | ARG | 61 | 1.342  | 2.513  | -10.331 | 1.00 | 0.00 |
| ATOM | 956 | NE   | ARG | 61 | 1.076  | 3.662  | -12.050 | 1.00 | 0.00 |
| ATOM | 957 | HE   | ARG | 61 | 1.473  | 4.370  | -12.651 | 1.00 | 0.00 |
| ATOM | 958 | CZ   | ARG | 61 | 0.109  | 2.886  | -12.535 | 1.00 | 0.00 |
| ATOM | 959 | NH1  | ARG | 61 | -0.406 | 1.933  | -11.804 | 1.00 | 0.00 |
| ATOM | 960 | HH11 | ARG | 61 | -0.068 | 1.783  | -10.864 | 1.00 | 0.00 |
| ATOM | 961 | HH12 | ARG | 61 | -1.139 | 1.350  | -12.182 | 1.00 | 0.00 |



|      |     |      |     |    |        |        |         |      |      |
|------|-----|------|-----|----|--------|--------|---------|------|------|
| ATOM | 962 | NH2  | ARG | 61 | -0.321 | 3.076  | -13.751 | 1.00 | 0.00 |
| ATOM | 963 | HH21 | ARG | 61 | 0.082  | 3.809  | -14.317 | 1.00 | 0.00 |
| ATOM | 964 | HH22 | ARG | 61 | -1.054 | 2.489  | -14.121 | 1.00 | 0.00 |
| ATOM | 965 | C    | ARG | 61 | 1.413  | 7.123  | -8.224  | 1.00 | 0.00 |
| ATOM | 966 | O    | ARG | 61 | 1.120  | 6.551  | -7.173  | 1.00 | 0.00 |
| ATOM | 967 | N    | CYX | 62 | 2.513  | 7.861  | -8.364  | 1.00 | 0.00 |
| ATOM | 968 | H    | CYX | 62 | 2.729  | 8.307  | -9.244  | 1.00 | 0.00 |
| ATOM | 969 | CA   | CYX | 62 | 3.447  | 8.031  | -7.255  | 1.00 | 0.00 |
| ATOM | 970 | HA   | CYX | 62 | 3.868  | 7.066  | -6.970  | 1.00 | 0.00 |
| ATOM | 971 | CB   | CYX | 62 | 4.593  | 8.962  | -7.671  | 1.00 | 0.00 |
| ATOM | 972 | HB2  | CYX | 62 | 4.267  | 9.999  | -7.590  | 1.00 | 0.00 |
| ATOM | 973 | HB3  | CYX | 62 | 5.450  | 8.799  | -7.017  | 1.00 | 0.00 |
| ATOM | 974 | SG   | CYX | 62 | 5.056  | 8.636  | -9.391  | 1.00 | 0.00 |
| ATOM | 975 | C    | CYX | 62 | 2.722  | 8.621  | -6.047  | 1.00 | 0.00 |
| ATOM | 976 | O    | CYX | 62 | 2.680  | 8.018  | -4.974  | 1.00 | 0.00 |
| ATOM | 977 | N    | GLU | 63 | 2.142  | 9.803  | -6.245  | 1.00 | 0.00 |
| ATOM | 978 | H    | GLU | 63 | 2.217  | 10.254 | -7.145  | 1.00 | 0.00 |
| ATOM | 979 | CA   | GLU | 63 | 1.401  | 10.485 | -5.189  | 1.00 | 0.00 |
| ATOM | 980 | HA   | GLU | 63 | 2.056  | 10.694 | -4.342  | 1.00 | 0.00 |
| ATOM | 981 | CB   | GLU | 63 | 0.853  | 11.811 | -5.724  | 1.00 | 0.00 |
| ATOM | 982 | HB2  | GLU | 63 | 1.661  | 12.368 | -6.199  | 1.00 | 0.00 |
| ATOM | 983 | HB3  | GLU | 63 | 0.072  | 11.608 | -6.456  | 1.00 | 0.00 |

|      |      |     |     |    |        |        |        |      |      |
|------|------|-----|-----|----|--------|--------|--------|------|------|
| ATOM | 984  | CG  | GLU | 63 | 0.269  | 12.640 | -4.570 | 1.00 | 0.00 |
| ATOM | 985  | HG2 | GLU | 63 | -0.452 | 12.030 | -4.025 | 1.00 | 0.00 |
| ATOM | 986  | HG3 | GLU | 63 | 1.079  | 12.930 | -3.900 | 1.00 | 0.00 |
| ATOM | 987  | CD  | GLU | 63 | -0.425 | 13.895 | -5.104 | 1.00 | 0.00 |
| ATOM | 988  | OE1 | GLU | 63 | -0.521 | 14.038 | -6.314 | 1.00 | 0.00 |
| ATOM | 989  | OE2 | GLU | 63 | -0.854 | 14.698 | -4.291 | 1.00 | 0.00 |
| ATOM | 990  | C   | GLU | 63 | 0.239  | 9.626  | -4.695 | 1.00 | 0.00 |
| ATOM | 991  | O   | GLU | 63 | -0.091 | 9.629  | -3.509 | 1.00 | 0.00 |
| ATOM | 992  | N   | GLY | 64 | -0.394 | 8.915  | -5.629 | 1.00 | 0.00 |
| ATOM | 993  | H   | GLY | 64 | -0.080 | 8.949  | -6.588 | 1.00 | 0.00 |
| ATOM | 994  | CA  | GLY | 64 | -1.545 | 8.075  | -5.306 | 1.00 | 0.00 |
| ATOM | 995  | HA2 | GLY | 64 | -2.377 | 8.720  | -5.026 | 1.00 | 0.00 |
| ATOM | 996  | HA3 | GLY | 64 | -1.813 | 7.499  | -6.191 | 1.00 | 0.00 |
| ATOM | 997  | C   | GLY | 64 | -1.255 | 7.114  | -4.159 | 1.00 | 0.00 |
| ATOM | 998  | O   | GLY | 64 | -1.942 | 7.138  | -3.138 | 1.00 | 0.00 |
| ATOM | 999  | N   | LEU | 65 | -0.248 | 6.264  | -4.333 | 1.00 | 0.00 |
| ATOM | 1000 | H   | LEU | 65 | 0.274  | 6.252  | -5.197 | 1.00 | 0.00 |
| ATOM | 1001 | CA  | LEU | 65 | 0.102  | 5.294  | -3.300 | 1.00 | 0.00 |
| ATOM | 1002 | HA  | LEU | 65 | -0.734 | 4.616  | -3.127 | 1.00 | 0.00 |
| ATOM | 1003 | CB  | LEU | 65 | 1.317  | 4.470  | -3.739 | 1.00 | 0.00 |
| ATOM | 1004 | HB2 | LEU | 65 | 2.147  | 5.140  | -3.962 | 1.00 | 0.00 |
| ATOM | 1005 | HB3 | LEU | 65 | 1.605  | 3.791  | -2.936 | 1.00 | 0.00 |

|      |      |      |     |    |        |       |        |      |      |
|------|------|------|-----|----|--------|-------|--------|------|------|
| ATOM | 1006 | CG   | LEU | 65 | 0.964  | 3.659 | -4.991 | 1.00 | 0.00 |
| ATOM | 1007 | HG   | LEU | 65 | 0.735  | 4.339 | -5.811 | 1.00 | 0.00 |
| ATOM | 1008 | CD1  | LEU | 65 | 2.151  | 2.774 | -5.379 | 1.00 | 0.00 |
| ATOM | 1009 | HD11 | LEU | 65 | 2.381  | 2.093 | -4.559 | 1.00 | 0.00 |
| ATOM | 1010 | HD12 | LEU | 65 | 1.900  | 2.197 | -6.269 | 1.00 | 0.00 |
| ATOM | 1011 | HD13 | LEU | 65 | 3.020  | 3.399 | -5.585 | 1.00 | 0.00 |
| ATOM | 1012 | CD2  | LEU | 65 | -0.259 | 2.777 | -4.703 | 1.00 | 0.00 |
| ATOM | 1013 | HD21 | LEU | 65 | -1.105 | 3.406 | -4.428 | 1.00 | 0.00 |
| ATOM | 1014 | HD22 | LEU | 65 | -0.509 | 2.200 | -5.593 | 1.00 | 0.00 |
| ATOM | 1015 | HD23 | LEU | 65 | -0.031 | 2.096 | -3.882 | 1.00 | 0.00 |
| ATOM | 1016 | C    | LEU | 65 | 0.397  | 5.977 | -1.969 | 1.00 | 0.00 |
| ATOM | 1017 | O    | LEU | 65 | -0.078 | 5.537 | -0.924 | 1.00 | 0.00 |
| ATOM | 1018 | N    | ARG | 66 | 1.179  | 7.054 | -2.010 | 1.00 | 0.00 |
| ATOM | 1019 | H    | ARG | 66 | 1.567  | 7.381 | -2.883 | 1.00 | 0.00 |
| ATOM | 1020 | CA   | ARG | 66 | 1.517  | 7.777 | -0.788 | 1.00 | 0.00 |
| ATOM | 1021 | HA   | ARG | 66 | 2.062  | 7.124 | -0.105 | 1.00 | 0.00 |
| ATOM | 1022 | CB   | ARG | 66 | 2.401  | 8.983 | -1.121 | 1.00 | 0.00 |
| ATOM | 1023 | HB2  | ARG | 66 | 1.900  | 9.606 | -1.862 | 1.00 | 0.00 |
| ATOM | 1024 | HB3  | ARG | 66 | 2.576  | 9.565 | -0.216 | 1.00 | 0.00 |
| ATOM | 1025 | CG   | ARG | 66 | 3.741  | 8.499 | -1.683 | 1.00 | 0.00 |
| ATOM | 1026 | HG2  | ARG | 66 | 4.222  | 7.840 | -0.959 | 1.00 | 0.00 |
| ATOM | 1027 | HG3  | ARG | 66 | 3.570  | 7.954 | -2.611 | 1.00 | 0.00 |

|      |      |      |     |    |        |        |        |      |      |
|------|------|------|-----|----|--------|--------|--------|------|------|
| ATOM | 1028 | CD   | ARG | 66 | 4.647  | 9.703  | -1.957 | 1.00 | 0.00 |
| ATOM | 1029 | HD2  | ARG | 66 | 5.544  | 9.378  | -2.486 | 1.00 | 0.00 |
| ATOM | 1030 | HD3  | ARG | 66 | 4.115  | 10.436 | -2.562 | 1.00 | 0.00 |
| ATOM | 1031 | NE   | ARG | 66 | 5.047  | 10.334 | -0.701 | 1.00 | 0.00 |
| ATOM | 1032 | HE   | ARG | 66 | 4.586  | 11.177 | -0.391 | 1.00 | 0.00 |
| ATOM | 1033 | CZ   | ARG | 66 | 6.015  | 9.823  | 0.059  | 1.00 | 0.00 |
| ATOM | 1034 | NH1  | ARG | 66 | 6.635  | 8.734  | -0.310 | 1.00 | 0.00 |
| ATOM | 1035 | HH11 | ARG | 66 | 6.379  | 8.279  | -1.174 | 1.00 | 0.00 |
| ATOM | 1036 | HH12 | ARG | 66 | 7.368  | 8.352  | 0.271  | 1.00 | 0.00 |
| ATOM | 1037 | NH2  | ARG | 66 | 6.345  | 10.412 | 1.174  | 1.00 | 0.00 |
| ATOM | 1038 | HH21 | ARG | 66 | 5.866  | 11.254 | 1.458  | 1.00 | 0.00 |
| ATOM | 1039 | HH22 | ARG | 66 | 7.079  | 10.023 | 1.749  | 1.00 | 0.00 |
| ATOM | 1040 | C    | ARG | 66 | 0.253  | 8.253  | -0.076 | 1.00 | 0.00 |
| ATOM | 1041 | O    | ARG | 66 | 0.053  | 7.977  | 1.108  | 1.00 | 0.00 |
| ATOM | 1042 | N    | MET | 67 | -0.596 | 8.966  | -0.812 | 1.00 | 0.00 |
| ATOM | 1043 | H    | MET | 67 | -0.373 | 9.186  | -1.772 | 1.00 | 0.00 |
| ATOM | 1044 | CA   | MET | 67 | -1.845 | 9.479  | -0.256 | 1.00 | 0.00 |
| ATOM | 1045 | HA   | MET | 67 | -1.641 | 10.104 | 0.614  | 1.00 | 0.00 |
| ATOM | 1046 | CB   | MET | 67 | -2.571 | 10.325 | -1.308 | 1.00 | 0.00 |
| ATOM | 1047 | HB2  | MET | 67 | -2.061 | 11.282 | -1.418 | 1.00 | 0.00 |
| ATOM | 1048 | HB3  | MET | 67 | -2.565 | 9.799  | -2.263 | 1.00 | 0.00 |
| ATOM | 1049 | CG   | MET | 67 | -4.019 | 10.565 | -0.866 | 1.00 | 0.00 |

|      |      |         |    |        |        |        |      |      |
|------|------|---------|----|--------|--------|--------|------|------|
| ATOM | 1050 | HG2 MET | 67 | -4.575 | 9.629  | -0.910 | 1.00 | 0.00 |
| ATOM | 1051 | HG3 MET | 67 | -4.032 | 10.946 | 0.155  | 1.00 | 0.00 |
| ATOM | 1052 | SD MET  | 67 | -4.801 | 11.776 | -1.964 | 1.00 | 0.00 |
| ATOM | 1053 | CE MET  | 67 | -3.818 | 13.214 | -1.468 | 1.00 | 0.00 |
| ATOM | 1054 | HE1 MET | 67 | -2.764 | 13.021 | -1.669 | 1.00 | 0.00 |
| ATOM | 1055 | HE2 MET | 67 | -4.141 | 14.088 | -2.033 | 1.00 | 0.00 |
| ATOM | 1056 | HE3 MET | 67 | -3.956 | 13.399 | -0.403 | 1.00 | 0.00 |
| ATOM | 1057 | C MET   | 67 | -2.758 | 8.348  | 0.210  | 1.00 | 0.00 |
| ATOM | 1058 | O MET   | 67 | -3.296 | 8.386  | 1.317  | 1.00 | 0.00 |
| ATOM | 1059 | N MET   | 68 | -2.945 | 7.358  | -0.656 | 1.00 | 0.00 |
| ATOM | 1060 | H MET   | 68 | -2.510 | 7.389  | -1.567 | 1.00 | 0.00 |
| ATOM | 1061 | CA MET  | 68 | -3.817 | 6.231  | -0.345 | 1.00 | 0.00 |
| ATOM | 1062 | HA MET  | 68 | -4.815 | 6.583  | -0.087 | 1.00 | 0.00 |
| ATOM | 1063 | CB MET  | 68 | -3.921 | 5.319  | -1.571 | 1.00 | 0.00 |
| ATOM | 1064 | HB2 MET | 68 | -4.626 | 5.752  | -2.280 | 1.00 | 0.00 |
| ATOM | 1065 | HB3 MET | 68 | -2.940 | 5.236  | -2.039 | 1.00 | 0.00 |
| ATOM | 1066 | CG MET  | 68 | -4.407 | 3.926  | -1.154 | 1.00 | 0.00 |
| ATOM | 1067 | HG2 MET | 68 | -3.616 | 3.407  | -0.611 | 1.00 | 0.00 |
| ATOM | 1068 | HG3 MET | 68 | -5.285 | 4.018  | -0.515 | 1.00 | 0.00 |
| ATOM | 1069 | SD MET  | 68 | -4.842 | 2.972  | -2.627 | 1.00 | 0.00 |
| ATOM | 1070 | CE MET  | 68 | -3.165 | 2.776  | -3.275 | 1.00 | 0.00 |
| ATOM | 1071 | HE1 MET | 68 | -2.552 | 2.248  | -2.544 | 1.00 | 0.00 |

|      |      |     |     |    |        |       |        |      |      |
|------|------|-----|-----|----|--------|-------|--------|------|------|
| ATOM | 1072 | HE2 | MET | 68 | -3.197 | 2.204 | -4.202 | 1.00 | 0.00 |
| ATOM | 1073 | HE3 | MET | 68 | -2.733 | 3.757 | -3.469 | 1.00 | 0.00 |
| ATOM | 1074 | C   | MET | 68 | -3.314 | 5.443 | 0.861  | 1.00 | 0.00 |
| ATOM | 1075 | O   | MET | 68 | -4.090 | 5.122 | 1.759  | 1.00 | 0.00 |
| ATOM | 1076 | N   | MET | 69 | -2.021 | 5.130 | 0.882  | 1.00 | 0.00 |
| ATOM | 1077 | H   | MET | 69 | -1.409 | 5.391 | 0.122  | 1.00 | 0.00 |
| ATOM | 1078 | CA  | MET | 69 | -1.456 | 4.374 | 1.995  | 1.00 | 0.00 |
| ATOM | 1079 | HA  | MET | 69 | -1.853 | 3.359 | 1.998  | 1.00 | 0.00 |
| ATOM | 1080 | CB  | MET | 69 | 0.069  | 4.303 | 1.859  | 1.00 | 0.00 |
| ATOM | 1081 | HB2 | MET | 69 | 0.326  | 3.908 | 0.876  | 1.00 | 0.00 |
| ATOM | 1082 | HB3 | MET | 69 | 0.489  | 5.303 | 1.969  | 1.00 | 0.00 |
| ATOM | 1083 | CG  | MET | 69 | 0.643  | 3.387 | 2.943  | 1.00 | 0.00 |
| ATOM | 1084 | HG2 | MET | 69 | 0.339  | 3.744 | 3.927  | 1.00 | 0.00 |
| ATOM | 1085 | HG3 | MET | 69 | 0.278  | 2.370 | 2.798  | 1.00 | 0.00 |
| ATOM | 1086 | SD  | MET | 69 | 2.450  | 3.390 | 2.841  | 1.00 | 0.00 |
| ATOM | 1087 | CE  | MET | 69 | 2.755  | 2.159 | 4.132  | 1.00 | 0.00 |
| ATOM | 1088 | HE1 | MET | 69 | 2.277  | 1.218 | 3.858  | 1.00 | 0.00 |
| ATOM | 1089 | HE2 | MET | 69 | 3.829  | 2.002 | 4.240  | 1.00 | 0.00 |
| ATOM | 1090 | HE3 | MET | 69 | 2.344  | 2.513 | 5.077  | 1.00 | 0.00 |
| ATOM | 1091 | C   | MET | 69 | -1.826 | 5.029 | 3.323  | 1.00 | 0.00 |
| ATOM | 1092 | O   | MET | 69 | -2.384 | 4.385 | 4.212  | 1.00 | 0.00 |
| ATOM | 1093 | N   | ARG | 70 | -1.516 | 6.316 | 3.441  | 1.00 | 0.00 |

|      |      |      |     |    |        |        |       |      |      |
|------|------|------|-----|----|--------|--------|-------|------|------|
| ATOM | 1094 | H    | ARG | 70 | -1.043 | 6.794  | 2.688 | 1.00 | 0.00 |
| ATOM | 1095 | CA   | ARG | 70 | -1.821 | 7.067  | 4.654 | 1.00 | 0.00 |
| ATOM | 1096 | HA   | ARG | 70 | -1.344 | 6.601  | 5.517 | 1.00 | 0.00 |
| ATOM | 1097 | CB   | ARG | 70 | -1.292 | 8.498  | 4.516 | 1.00 | 0.00 |
| ATOM | 1098 | HB2  | ARG | 70 | -1.731 | 8.965  | 3.635 | 1.00 | 0.00 |
| ATOM | 1099 | HB3  | ARG | 70 | -1.560 | 9.072  | 5.403 | 1.00 | 0.00 |
| ATOM | 1100 | CG   | ARG | 70 | 0.233  | 8.466  | 4.371 | 1.00 | 0.00 |
| ATOM | 1101 | HG2  | ARG | 70 | 0.671  | 7.993  | 5.250 | 1.00 | 0.00 |
| ATOM | 1102 | HG3  | ARG | 70 | 0.501  | 7.895  | 3.482 | 1.00 | 0.00 |
| ATOM | 1103 | CD   | ARG | 70 | 0.768  | 9.894  | 4.241 | 1.00 | 0.00 |
| ATOM | 1104 | HD2  | ARG | 70 | 0.200  | 10.437 | 3.486 | 1.00 | 0.00 |
| ATOM | 1105 | HD3  | ARG | 70 | 0.687  | 10.410 | 5.198 | 1.00 | 0.00 |
| ATOM | 1106 | NE   | ARG | 70 | 2.172  | 9.869  | 3.841 | 1.00 | 0.00 |
| ATOM | 1107 | HE   | ARG | 70 | 2.748  | 9.071  | 4.070 | 1.00 | 0.00 |
| ATOM | 1108 | CZ   | ARG | 70 | 2.724  | 10.882 | 3.173 | 1.00 | 0.00 |
| ATOM | 1109 | NH1  | ARG | 70 | 2.015  | 11.937 | 2.869 | 1.00 | 0.00 |
| ATOM | 1110 | HH11 | ARG | 70 | 1.044  | 11.984 | 3.142 | 1.00 | 0.00 |
| ATOM | 1111 | HH12 | ARG | 70 | 2.442  | 12.699 | 2.363 | 1.00 | 0.00 |
| ATOM | 1112 | NH2  | ARG | 70 | 3.979  | 10.821 | 2.821 | 1.00 | 0.00 |
| ATOM | 1113 | HH21 | ARG | 70 | 4.528  | 10.006 | 3.057 | 1.00 | 0.00 |
| ATOM | 1114 | HH22 | ARG | 70 | 4.397  | 11.589 | 2.315 | 1.00 | 0.00 |
| ATOM | 1115 | C    | ARG | 70 | -3.327 | 7.102  | 4.914 | 1.00 | 0.00 |

|      |      |     |     |    |        |        |        |      |      |
|------|------|-----|-----|----|--------|--------|--------|------|------|
| ATOM | 1116 | O   | ARG | 70 | -3.773 | 6.950  | 6.051  | 1.00 | 0.00 |
| ATOM | 1117 | N   | MET | 71 | -4.101 | 7.311  | 3.848  | 1.00 | 0.00 |
| ATOM | 1118 | H   | MET | 71 | -3.681 | 7.453  | 2.941  | 1.00 | 0.00 |
| ATOM | 1119 | CA  | MET | 71 | -5.553 | 7.376  | 3.956  | 1.00 | 0.00 |
| ATOM | 1120 | HA  | MET | 71 | -5.840 | 8.123  | 4.696  | 1.00 | 0.00 |
| ATOM | 1121 | CB  | MET | 71 | -6.159 | 7.767  | 2.605  | 1.00 | 0.00 |
| ATOM | 1122 | HB2 | MET | 71 | -5.643 | 8.646  | 2.218  | 1.00 | 0.00 |
| ATOM | 1123 | HB3 | MET | 71 | -6.043 | 6.940  | 1.904  | 1.00 | 0.00 |
| ATOM | 1124 | CG  | MET | 71 | -7.648 | 8.084  | 2.780  | 1.00 | 0.00 |
| ATOM | 1125 | HG2 | MET | 71 | -8.151 | 7.238  | 3.249  | 1.00 | 0.00 |
| ATOM | 1126 | HG3 | MET | 71 | -7.764 | 8.968  | 3.407  | 1.00 | 0.00 |
| ATOM | 1127 | SD  | MET | 71 | -8.396 | 8.400  | 1.161  | 1.00 | 0.00 |
| ATOM | 1128 | CE  | MET | 71 | -7.459 | 9.895  | 0.754  | 1.00 | 0.00 |
| ATOM | 1129 | HE1 | MET | 71 | -6.394 | 9.662  | 0.733  | 1.00 | 0.00 |
| ATOM | 1130 | HE2 | MET | 71 | -7.769 | 10.264 | -0.223 | 1.00 | 0.00 |
| ATOM | 1131 | HE3 | MET | 71 | -7.648 | 10.659 | 1.508  | 1.00 | 0.00 |
| ATOM | 1132 | C   | MET | 71 | -6.124 | 6.040  | 4.411  | 1.00 | 0.00 |
| ATOM | 1133 | O   | MET | 71 | -7.072 | 5.996  | 5.195  | 1.00 | 0.00 |
| ATOM | 1134 | N   | MET | 72 | -5.551 | 4.954  | 3.904  | 1.00 | 0.00 |
| ATOM | 1135 | H   | MET | 72 | -4.789 | 5.030  | 3.245  | 1.00 | 0.00 |
| ATOM | 1136 | CA  | MET | 72 | -6.025 | 3.625  | 4.260  | 1.00 | 0.00 |
| ATOM | 1137 | HA  | MET | 72 | -7.060 | 3.500  | 3.943  | 1.00 | 0.00 |



|      |      |     |     |    |        |        |       |      |      |
|------|------|-----|-----|----|--------|--------|-------|------|------|
| ATOM | 1138 | CB  | MET | 72 | -5.169 | 2.559  | 3.568 | 1.00 | 0.00 |
| ATOM | 1139 | HB2 | MET | 72 | -4.118 | 2.840  | 3.639 | 1.00 | 0.00 |
| ATOM | 1140 | HB3 | MET | 72 | -5.322 | 1.599  | 4.062 | 1.00 | 0.00 |
| ATOM | 1141 | CG  | MET | 72 | -5.568 | 2.444  | 2.094 | 1.00 | 0.00 |
| ATOM | 1142 | HG2 | MET | 72 | -5.539 | 3.428  | 1.627 | 1.00 | 0.00 |
| ATOM | 1143 | HG3 | MET | 72 | -4.878 | 1.776  | 1.577 | 1.00 | 0.00 |
| ATOM | 1144 | SD  | MET | 72 | -7.247 | 1.776  | 1.972 | 1.00 | 0.00 |
| ATOM | 1145 | CE  | MET | 72 | -6.903 | 0.152  | 2.697 | 1.00 | 0.00 |
| ATOM | 1146 | HE1 | MET | 72 | -6.527 | 0.279  | 3.713 | 1.00 | 0.00 |
| ATOM | 1147 | HE2 | MET | 72 | -7.819 | -0.438 | 2.720 | 1.00 | 0.00 |
| ATOM | 1148 | HE3 | MET | 72 | -6.154 | -0.364 | 2.096 | 1.00 | 0.00 |
| ATOM | 1149 | C   | MET | 72 | -5.978 | 3.417  | 5.768 | 1.00 | 0.00 |
| ATOM | 1150 | O   | MET | 72 | -6.993 | 3.101  | 6.392 | 1.00 | 0.00 |
| ATOM | 1151 | N   | GLN | 73 | -4.796 | 3.603  | 6.346 | 1.00 | 0.00 |
| ATOM | 1152 | H   | GLN | 73 | -3.986 | 3.839  | 5.790 | 1.00 | 0.00 |
| ATOM | 1153 | CA  | GLN | 73 | -4.623 | 3.442  | 7.784 | 1.00 | 0.00 |
| ATOM | 1154 | HA  | GLN | 73 | -4.912 | 2.434  | 8.084 | 1.00 | 0.00 |
| ATOM | 1155 | CB  | GLN | 73 | -3.157 | 3.664  | 8.165 | 1.00 | 0.00 |
| ATOM | 1156 | HB2 | GLN | 73 | -2.863 | 4.678  | 7.896 | 1.00 | 0.00 |
| ATOM | 1157 | HB3 | GLN | 73 | -3.038 | 3.525  | 9.240 | 1.00 | 0.00 |
| ATOM | 1158 | CG  | GLN | 73 | -2.271 | 2.662  | 7.420 | 1.00 | 0.00 |
| ATOM | 1159 | HG2 | GLN | 73 | -2.256 | 2.879  | 6.352 | 1.00 | 0.00 |

|      |      |      |     |    |        |        |       |      |      |
|------|------|------|-----|----|--------|--------|-------|------|------|
| ATOM | 1160 | HG3  | GLN | 73 | -1.256 | 2.714  | 7.815 | 1.00 | 0.00 |
| ATOM | 1161 | CD   | GLN | 73 | -2.799 | 1.248  | 7.622 | 1.00 | 0.00 |
| ATOM | 1162 | OE1  | GLN | 73 | -2.763 | 0.721  | 8.734 | 1.00 | 0.00 |
| ATOM | 1163 | NE2  | GLN | 73 | -3.306 | 0.607  | 6.608 | 1.00 | 0.00 |
| ATOM | 1164 | HE21 | GLN | 73 | -3.658 | -0.332 | 6.733 | 1.00 | 0.00 |
| ATOM | 1165 | HE22 | GLN | 73 | -3.344 | 1.051  | 5.702 | 1.00 | 0.00 |
| ATOM | 1166 | C    | GLN | 73 | -5.508 | 4.424  | 8.545 | 1.00 | 0.00 |
| ATOM | 1167 | O    | GLN | 73 | -6.103 | 4.080  | 9.562 | 1.00 | 0.00 |
| ATOM | 1168 | N    | GLN | 74 | -5.580 | 5.651  | 8.042 | 1.00 | 0.00 |
| ATOM | 1169 | H    | GLN | 74 | -5.045 | 5.899  | 7.222 | 1.00 | 0.00 |
| ATOM | 1170 | CA   | GLN | 74 | -6.385 | 6.685  | 8.681 | 1.00 | 0.00 |
| ATOM | 1171 | HA   | GLN | 74 | -6.075 | 6.816  | 9.718 | 1.00 | 0.00 |
| ATOM | 1172 | CB   | GLN | 74 | -6.198 | 8.014  | 7.942 | 1.00 | 0.00 |
| ATOM | 1173 | HB2  | GLN | 74 | -5.261 | 8.475  | 8.255 | 1.00 | 0.00 |
| ATOM | 1174 | HB3  | GLN | 74 | -6.171 | 7.831  | 6.868 | 1.00 | 0.00 |
| ATOM | 1175 | CG   | GLN | 74 | -7.362 | 8.951  | 8.271 | 1.00 | 0.00 |
| ATOM | 1176 | HG2  | GLN | 74 | -7.904 | 8.588  | 9.145 | 1.00 | 0.00 |
| ATOM | 1177 | HG3  | GLN | 74 | -6.986 | 9.955  | 8.469 | 1.00 | 0.00 |
| ATOM | 1178 | CD   | GLN | 74 | -8.325 | 9.015  | 7.092 | 1.00 | 0.00 |
| ATOM | 1179 | OE1  | GLN | 74 | -8.355 | 8.029  | 6.241 | 1.00 | 0.00 |
| ATOM | 1180 | NE2  | GLN | 74 | -9.070 | 9.984  | 6.946 | 1.00 | 0.00 |
| ATOM | 1181 | HE21 | GLN | 74 | -9.704 | 10.015 | 6.161 | 1.00 | 0.00 |

|      |      |      |     |    |         |        |       |      |      |
|------|------|------|-----|----|---------|--------|-------|------|------|
| ATOM | 1182 | HE22 | GLN | 74 | -9.043  | 10.742 | 7.613 | 1.00 | 0.00 |
| ATOM | 1183 | C    | GLN | 74 | -7.865  | 6.307  | 8.717 | 1.00 | 0.00 |
| ATOM | 1184 | O    | GLN | 74 | -8.535  | 6.498  | 9.733 | 1.00 | 0.00 |
| ATOM | 1185 | N    | LYS | 75 | -8.370  | 5.785  | 7.606 | 1.00 | 0.00 |
| ATOM | 1186 | H    | LYS | 75 | -7.791  | 5.656  | 6.788 | 1.00 | 0.00 |
| ATOM | 1187 | CA   | LYS | 75 | -9.777  | 5.407  | 7.525 | 1.00 | 0.00 |
| ATOM | 1188 | HA   | LYS | 75 | -10.411 | 6.278  | 7.690 | 1.00 | 0.00 |
| ATOM | 1189 | CB   | LYS | 75 | -10.077 | 4.838  | 6.135 | 1.00 | 0.00 |
| ATOM | 1190 | HB2  | LYS | 75 | -9.745  | 5.547  | 5.377 | 1.00 | 0.00 |
| ATOM | 1191 | HB3  | LYS | 75 | -9.543  | 3.896  | 6.009 | 1.00 | 0.00 |
| ATOM | 1192 | CG   | LYS | 75 | -11.584 | 4.596  | 5.984 | 1.00 | 0.00 |
| ATOM | 1193 | HG2  | LYS | 75 | -11.760 | 3.939  | 5.132 | 1.00 | 0.00 |
| ATOM | 1194 | HG3  | LYS | 75 | -11.966 | 4.125  | 6.890 | 1.00 | 0.00 |
| ATOM | 1195 | CD   | LYS | 75 | -12.305 | 5.929  | 5.758 | 1.00 | 0.00 |
| ATOM | 1196 | HD2  | LYS | 75 | -12.187 | 6.559  | 6.640 | 1.00 | 0.00 |
| ATOM | 1197 | HD3  | LYS | 75 | -11.875 | 6.432  | 4.892 | 1.00 | 0.00 |
| ATOM | 1198 | CE   | LYS | 75 | -13.793 | 5.671  | 5.511 | 1.00 | 0.00 |
| ATOM | 1199 | HE2  | LYS | 75 | -14.182 | 5.017  | 6.291 | 1.00 | 0.00 |
| ATOM | 1200 | HE3  | LYS | 75 | -14.333 | 6.617  | 5.528 | 1.00 | 0.00 |
| ATOM | 1201 | NZ   | LYS | 75 | -13.972 | 5.020  | 4.182 | 1.00 | 0.00 |
| ATOM | 1202 | HZ1  | LYS | 75 | -13.471 | 4.142  | 4.167 | 1.00 | 0.00 |
| ATOM | 1203 | HZ2  | LYS | 75 | -14.954 | 4.850  | 4.020 | 1.00 | 0.00 |

|      |      |     |     |    |         |        |        |      |      |
|------|------|-----|-----|----|---------|--------|--------|------|------|
| ATOM | 1204 | HZ3 | LYS | 75 | -13.611 | 5.626  | 3.459  | 1.00 | 0.00 |
| ATOM | 1205 | C   | LYS | 75 | -10.125 | 4.370  | 8.589  | 1.00 | 0.00 |
| ATOM | 1206 | O   | LYS | 75 | -11.180 | 4.444  | 9.221  | 1.00 | 0.00 |
| ATOM | 1207 | N   | GLU | 76 | -9.231  | 3.409  | 8.776  | 1.00 | 0.00 |
| ATOM | 1208 | H   | GLU | 76 | -8.389  | 3.376  | 8.218  | 1.00 | 0.00 |
| ATOM | 1209 | CA  | GLU | 76 | -9.448  | 2.354  | 9.765  | 1.00 | 0.00 |
| ATOM | 1210 | HA  | GLU | 76 | -9.762  | 2.788  | 10.714 | 1.00 | 0.00 |
| ATOM | 1211 | CB  | GLU | 76 | -10.545 | 1.398  | 9.276  | 1.00 | 0.00 |
| ATOM | 1212 | HB2 | GLU | 76 | -11.416 | 1.976  | 8.969  | 1.00 | 0.00 |
| ATOM | 1213 | HB3 | GLU | 76 | -10.172 | 0.825  | 8.427  | 1.00 | 0.00 |
| ATOM | 1214 | CG  | GLU | 76 | -10.941 | 0.437  | 10.407 | 1.00 | 0.00 |
| ATOM | 1215 | HG2 | GLU | 76 | -11.605 | -0.328 | 10.004 | 1.00 | 0.00 |
| ATOM | 1216 | HG3 | GLU | 76 | -10.041 | -0.035 | 10.802 | 1.00 | 0.00 |
| ATOM | 1217 | CD  | GLU | 76 | -11.655 | 1.191  | 11.530 | 1.00 | 0.00 |
| ATOM | 1218 | OE1 | GLU | 76 | -12.273 | 2.207  | 11.247 | 1.00 | 0.00 |
| ATOM | 1219 | OE2 | GLU | 76 | -11.573 | 0.741  | 12.661 | 1.00 | 0.00 |
| ATOM | 1220 | C   | GLU | 76 | -8.157  | 1.578  | 10.017 | 1.00 | 0.00 |
| ATOM | 1221 | O   | GLU | 76 | -8.000  | 0.451  | 9.543  | 1.00 | 0.00 |
| ATOM | 1222 | N   | MET | 77 | -7.232  | 2.187  | 10.752 | 1.00 | 0.00 |
| ATOM | 1223 | H   | MET | 77 | -7.387  | 3.122  | 11.100 | 1.00 | 0.00 |
| ATOM | 1224 | CA  | MET | 77 | -5.956  | 1.541  | 11.050 | 1.00 | 0.00 |
| ATOM | 1225 | HA  | MET | 77 | -5.404  | 1.360  | 10.128 | 1.00 | 0.00 |

|      |      |     |     |    |        |        |        |      |      |
|------|------|-----|-----|----|--------|--------|--------|------|------|
| ATOM | 1226 | CB  | MET | 77 | -5.111 | 2.443  | 11.958 | 1.00 | 0.00 |
| ATOM | 1227 | HB2 | MET | 77 | -5.045 | 3.438  | 11.519 | 1.00 | 0.00 |
| ATOM | 1228 | HB3 | MET | 77 | -5.580 | 2.510  | 12.940 | 1.00 | 0.00 |
| ATOM | 1229 | CG  | MET | 77 | -3.704 | 1.856  | 12.105 | 1.00 | 0.00 |
| ATOM | 1230 | HG2 | MET | 77 | -3.767 | 0.837  | 12.487 | 1.00 | 0.00 |
| ATOM | 1231 | HG3 | MET | 77 | -3.204 | 1.849  | 11.137 | 1.00 | 0.00 |
| ATOM | 1232 | SD  | MET | 77 | -2.747 | 2.866  | 13.261 | 1.00 | 0.00 |
| ATOM | 1233 | CE  | MET | 77 | -1.178 | 1.980  | 13.095 | 1.00 | 0.00 |
| ATOM | 1234 | HE1 | MET | 77 | -0.845 | 2.021  | 12.058 | 1.00 | 0.00 |
| ATOM | 1235 | HE2 | MET | 77 | -0.428 | 2.444  | 13.736 | 1.00 | 0.00 |
| ATOM | 1236 | HE3 | MET | 77 | -1.314 | 0.940  | 13.392 | 1.00 | 0.00 |
| ATOM | 1237 | C   | MET | 77 | -6.174 | 0.188  | 11.727 | 1.00 | 0.00 |
| ATOM | 1238 | O   | MET | 77 | -6.287 | 0.112  | 12.952 | 1.00 | 0.00 |
| ATOM | 1239 | N   | GLN | 78 | -6.218 | -0.876 | 10.928 | 1.00 | 0.00 |
| ATOM | 1240 | H   | GLN | 78 | -6.137 | -0.771 | 9.927  | 1.00 | 0.00 |
| ATOM | 1241 | CA  | GLN | 78 | -6.403 | -2.219 | 11.470 | 1.00 | 0.00 |
| ATOM | 1242 | HA  | GLN | 78 | -7.389 | -2.305 | 11.927 | 1.00 | 0.00 |
| ATOM | 1243 | CB  | GLN | 78 | -6.290 | -3.260 | 10.349 | 1.00 | 0.00 |
| ATOM | 1244 | HB2 | GLN | 78 | -5.866 | -2.791 | 9.461  | 1.00 | 0.00 |
| ATOM | 1245 | HB3 | GLN | 78 | -5.641 | -4.074 | 10.675 | 1.00 | 0.00 |
| ATOM | 1246 | CG  | GLN | 78 | -7.679 | -3.816 | 10.019 | 1.00 | 0.00 |
| ATOM | 1247 | HG2 | GLN | 78 | -8.126 | -4.256 | 10.911 | 1.00 | 0.00 |

|      |      |      |     |    |        |        |        |      |      |
|------|------|------|-----|----|--------|--------|--------|------|------|
| ATOM | 1248 | HG3  | GLN | 78 | -8.321 | -3.018 | 9.648  | 1.00 | 0.00 |
| ATOM | 1249 | CD   | GLN | 78 | -7.570 | -4.895 | 8.944  | 1.00 | 0.00 |
| ATOM | 1250 | OE1  | GLN | 78 | -6.758 | -5.813 | 9.063  | 1.00 | 0.00 |
| ATOM | 1251 | NE2  | GLN | 78 | -8.345 | -4.839 | 7.895  | 1.00 | 0.00 |
| ATOM | 1252 | HE21 | GLN | 78 | -8.276 | -5.551 | 7.182  | 1.00 | 0.00 |
| ATOM | 1253 | HE22 | GLN | 78 | -9.009 | -4.085 | 7.802  | 1.00 | 0.00 |
| ATOM | 1254 | C    | GLN | 78 | -5.344 | -2.491 | 12.539 | 1.00 | 0.00 |
| ATOM | 1255 | O    | GLN | 78 | -4.165 | -2.201 | 12.328 | 1.00 | 0.00 |
| ATOM | 1256 | N    | PRO | 79 | -5.724 | -3.031 | 13.671 | 1.00 | 0.00 |
| ATOM | 1257 | CD   | PRO | 79 | -7.087 | -3.426 | 14.045 | 1.00 | 0.00 |
| ATOM | 1258 | HD2  | PRO | 79 | -7.365 | -4.323 | 13.491 | 1.00 | 0.00 |
| ATOM | 1259 | HD3  | PRO | 79 | -7.775 | -2.618 | 13.798 | 1.00 | 0.00 |
| ATOM | 1260 | CG   | PRO | 79 | -6.993 | -3.673 | 15.559 | 1.00 | 0.00 |
| ATOM | 1261 | HG2  | PRO | 79 | -7.106 | -4.740 | 15.752 | 1.00 | 0.00 |
| ATOM | 1262 | HG3  | PRO | 79 | -7.793 | -3.127 | 16.058 | 1.00 | 0.00 |
| ATOM | 1263 | CB   | PRO | 79 | -5.655 | -3.178 | 16.000 | 1.00 | 0.00 |
| ATOM | 1264 | HB2  | PRO | 79 | -5.297 | -3.838 | 16.791 | 1.00 | 0.00 |
| ATOM | 1265 | HB3  | PRO | 79 | -5.633 | -2.147 | 16.351 | 1.00 | 0.00 |
| ATOM | 1266 | CA   | PRO | 79 | -4.776 | -3.325 | 14.767 | 1.00 | 0.00 |
| ATOM | 1267 | HA   | PRO | 79 | -3.955 | -2.610 | 14.716 | 1.00 | 0.00 |
| ATOM | 1268 | C    | PRO | 79 | -4.223 | -4.738 | 14.662 | 1.00 | 0.00 |
| ATOM | 1269 | O    | PRO | 79 | -4.943 | -5.720 | 14.851 | 1.00 | 0.00 |

|      |      |      |     |    |        |        |        |      |      |
|------|------|------|-----|----|--------|--------|--------|------|------|
| ATOM | 1270 | N    | ARG | 80 | -2.941 | -4.820 | 14.372 | 1.00 | 0.00 |
| ATOM | 1271 | H    | ARG | 80 | -2.406 | -3.979 | 14.208 | 1.00 | 0.00 |
| ATOM | 1272 | CA   | ARG | 80 | -2.265 | -6.102 | 14.250 | 1.00 | 0.00 |
| ATOM | 1273 | HA   | ARG | 80 | -2.388 | -6.673 | 15.171 | 1.00 | 0.00 |
| ATOM | 1274 | CB   | ARG | 80 | -2.852 | -6.910 | 13.091 | 1.00 | 0.00 |
| ATOM | 1275 | HB2  | ARG | 80 | -3.556 | -6.292 | 12.535 | 1.00 | 0.00 |
| ATOM | 1276 | HB3  | ARG | 80 | -2.049 | -7.233 | 12.428 | 1.00 | 0.00 |
| ATOM | 1277 | CG   | ARG | 80 | -3.579 | -8.138 | 13.646 | 1.00 | 0.00 |
| ATOM | 1278 | HG2  | ARG | 80 | -2.865 | -8.950 | 13.783 | 1.00 | 0.00 |
| ATOM | 1279 | HG3  | ARG | 80 | -4.032 | -7.888 | 14.606 | 1.00 | 0.00 |
| ATOM | 1280 | CD   | ARG | 80 | -4.668 | -8.577 | 12.668 | 1.00 | 0.00 |
| ATOM | 1281 | HD2  | ARG | 80 | -4.511 | -8.101 | 11.700 | 1.00 | 0.00 |
| ATOM | 1282 | HD3  | ARG | 80 | -4.643 | -9.660 | 12.548 | 1.00 | 0.00 |
| ATOM | 1283 | NE   | ARG | 80 | -5.985 | -8.191 | 13.172 | 1.00 | 0.00 |
| ATOM | 1284 | HE   | ARG | 80 | -6.453 | -8.778 | 13.849 | 1.00 | 0.00 |
| ATOM | 1285 | CZ   | ARG | 80 | -6.596 | -7.079 | 12.763 | 1.00 | 0.00 |
| ATOM | 1286 | NH1  | ARG | 80 | -6.020 | -6.287 | 11.899 | 1.00 | 0.00 |
| ATOM | 1287 | HH11 | ARG | 80 | -5.105 | -6.519 | 11.538 | 1.00 | 0.00 |
| ATOM | 1288 | HH12 | ARG | 80 | -6.491 | -5.447 | 11.596 | 1.00 | 0.00 |
| ATOM | 1289 | NH2  | ARG | 80 | -7.776 | -6.780 | 13.230 | 1.00 | 0.00 |
| ATOM | 1290 | HH21 | ARG | 80 | -8.221 | -7.392 | 13.899 | 1.00 | 0.00 |
| ATOM | 1291 | HH22 | ARG | 80 | -8.239 | -5.938 | 12.921 | 1.00 | 0.00 |

|      |      |     |     |    |        |         |        |      |      |
|------|------|-----|-----|----|--------|---------|--------|------|------|
| ATOM | 1292 | C   | ARG | 80 | -0.775 | -5.883  | 14.024 | 1.00 | 0.00 |
| ATOM | 1293 | O   | ARG | 80 | -0.386 | -5.135  | 13.126 | 1.00 | 0.00 |
| ATOM | 1294 | N   | GLY | 81 | 0.057  | -6.526  | 14.836 | 1.00 | 0.00 |
| ATOM | 1295 | H   | GLY | 81 | -0.284 | -7.136  | 15.566 | 1.00 | 0.00 |
| ATOM | 1296 | CA  | GLY | 81 | 1.496  | -6.364  | 14.690 | 1.00 | 0.00 |
| ATOM | 1297 | HA2 | GLY | 81 | 1.699  | -5.368  | 14.298 | 1.00 | 0.00 |
| ATOM | 1298 | HA3 | GLY | 81 | 1.962  | -6.470  | 15.670 | 1.00 | 0.00 |
| ATOM | 1299 | C   | GLY | 81 | 2.092  | -7.402  | 13.742 | 1.00 | 0.00 |
| ATOM | 1300 | O   | GLY | 81 | 2.470  | -7.079  | 12.619 | 1.00 | 0.00 |
| ATOM | 1301 | N   | GLU | 82 | 2.186  | -8.642  | 14.212 | 1.00 | 0.00 |
| ATOM | 1302 | H   | GLU | 82 | 1.886  | -8.849  | 15.154 | 1.00 | 0.00 |
| ATOM | 1303 | CA  | GLU | 82 | 2.761  | -9.726  | 13.414 | 1.00 | 0.00 |
| ATOM | 1304 | HA  | GLU | 82 | 3.768  | -9.462  | 13.090 | 1.00 | 0.00 |
| ATOM | 1305 | CB  | GLU | 82 | 2.837  | -11.003 | 14.257 | 1.00 | 0.00 |
| ATOM | 1306 | HB2 | GLU | 82 | 1.853  | -11.221 | 14.672 | 1.00 | 0.00 |
| ATOM | 1307 | HB3 | GLU | 82 | 3.157  | -11.833 | 13.627 | 1.00 | 0.00 |
| ATOM | 1308 | CG  | GLU | 82 | 3.844  | -10.812 | 15.401 | 1.00 | 0.00 |
| ATOM | 1309 | HG2 | GLU | 82 | 4.136  | -11.792 | 15.779 | 1.00 | 0.00 |
| ATOM | 1310 | HG3 | GLU | 82 | 4.723  | -10.297 | 15.013 | 1.00 | 0.00 |
| ATOM | 1311 | CD  | GLU | 82 | 3.230  | -9.989  | 16.537 | 1.00 | 0.00 |
| ATOM | 1312 | OE1 | GLU | 82 | 2.017  | -10.010 | 16.682 | 1.00 | 0.00 |
| ATOM | 1313 | OE2 | GLU | 82 | 3.986  | -9.347  | 17.248 | 1.00 | 0.00 |



|      |      |      |     |    |        |         |        |      |      |
|------|------|------|-----|----|--------|---------|--------|------|------|
| ATOM | 1314 | C    | GLU | 82 | 1.970  | -10.014 | 12.136 | 1.00 | 0.00 |
| ATOM | 1315 | O    | GLU | 82 | 2.558  | -10.216 | 11.073 | 1.00 | 0.00 |
| ATOM | 1316 | N    | GLN | 83 | 0.644  | -10.073 | 12.246 | 1.00 | 0.00 |
| ATOM | 1317 | H    | GLN | 83 | 0.195  | -9.930  | 13.139 | 1.00 | 0.00 |
| ATOM | 1318 | CA   | GLN | 83 | -0.196 | -10.386 | 11.089 | 1.00 | 0.00 |
| ATOM | 1319 | HA   | GLN | 83 | 0.073  | -11.361 | 10.681 | 1.00 | 0.00 |
| ATOM | 1320 | CB   | GLN | 83 | -1.668 | -10.422 | 11.516 | 1.00 | 0.00 |
| ATOM | 1321 | HB2  | GLN | 83 | -1.778 | -11.088 | 12.372 | 1.00 | 0.00 |
| ATOM | 1322 | HB3  | GLN | 83 | -1.987 | -9.418  | 11.795 | 1.00 | 0.00 |
| ATOM | 1323 | CG   | GLN | 83 | -2.534 | -10.930 | 10.359 | 1.00 | 0.00 |
| ATOM | 1324 | HG2  | GLN | 83 | -3.587 | -10.751 | 10.575 | 1.00 | 0.00 |
| ATOM | 1325 | HG3  | GLN | 83 | -2.260 | -10.417 | 9.437  | 1.00 | 0.00 |
| ATOM | 1326 | CD   | GLN | 83 | -2.324 | -12.429 | 10.164 | 1.00 | 0.00 |
| ATOM | 1327 | OE1  | GLN | 83 | -2.719 | -13.227 | 11.013 | 1.00 | 0.00 |
| ATOM | 1328 | NE2  | GLN | 83 | -1.723 | -12.860 | 9.089  | 1.00 | 0.00 |
| ATOM | 1329 | HE21 | GLN | 83 | -1.582 | -13.852 | 8.956  | 1.00 | 0.00 |
| ATOM | 1330 | HE22 | GLN | 83 | -1.401 | -12.201 | 8.395  | 1.00 | 0.00 |
| ATOM | 1331 | C    | GLN | 83 | -0.018 | -9.373  | 9.955  | 1.00 | 0.00 |
| ATOM | 1332 | O    | GLN | 83 | 0.455  | -9.719  | 8.873  | 1.00 | 0.00 |
| ATOM | 1333 | N    | MET | 84 | -0.410 | -8.128  | 10.210 | 1.00 | 0.00 |
| ATOM | 1334 | H    | MET | 84 | -0.852 | -7.906  | 11.091 | 1.00 | 0.00 |
| ATOM | 1335 | CA   | MET | 84 | -0.300 | -7.074  | 9.204  | 1.00 | 0.00 |

|      |      |     |     |    |        |        |        |      |      |
|------|------|-----|-----|----|--------|--------|--------|------|------|
| ATOM | 1336 | HA  | MET | 84 | -0.794 | -7.386 | 8.284  | 1.00 | 0.00 |
| ATOM | 1337 | CB  | MET | 84 | -0.965 | -5.792 | 9.705  | 1.00 | 0.00 |
| ATOM | 1338 | HB2 | MET | 84 | -0.704 | -5.630 | 10.751 | 1.00 | 0.00 |
| ATOM | 1339 | HB3 | MET | 84 | -0.622 | -4.946 | 9.110  | 1.00 | 0.00 |
| ATOM | 1340 | CG  | MET | 84 | -2.489 | -5.926 | 9.573  | 1.00 | 0.00 |
| ATOM | 1341 | HG2 | MET | 84 | -2.756 | -6.092 | 8.530  | 1.00 | 0.00 |
| ATOM | 1342 | HG3 | MET | 84 | -2.839 | -6.765 | 10.175 | 1.00 | 0.00 |
| ATOM | 1343 | SD  | MET | 84 | -3.279 | -4.405 | 10.155 | 1.00 | 0.00 |
| ATOM | 1344 | CE  | MET | 84 | -2.799 | -3.343 | 8.770  | 1.00 | 0.00 |
| ATOM | 1345 | HE1 | MET | 84 | -3.204 | -3.749 | 7.843  | 1.00 | 0.00 |
| ATOM | 1346 | HE2 | MET | 84 | -3.191 | -2.339 | 8.929  | 1.00 | 0.00 |
| ATOM | 1347 | HE3 | MET | 84 | -1.712 | -3.302 | 8.703  | 1.00 | 0.00 |
| ATOM | 1348 | C   | MET | 84 | 1.149  | -6.811 | 8.796  | 1.00 | 0.00 |
| ATOM | 1349 | O   | MET | 84 | 1.407  | -6.414 | 7.661  | 1.00 | 0.00 |
| ATOM | 1350 | N   | ARG | 85 | 2.096  | -7.026 | 9.710  | 1.00 | 0.00 |
| ATOM | 1351 | H   | ARG | 85 | 1.868  | -7.332 | 10.645 | 1.00 | 0.00 |
| ATOM | 1352 | CA  | ARG | 85 | 3.503  | -6.794 | 9.380  | 1.00 | 0.00 |
| ATOM | 1353 | HA  | ARG | 85 | 3.678  | -5.729 | 9.231  | 1.00 | 0.00 |
| ATOM | 1354 | CB  | ARG | 85 | 4.406  | -7.283 | 10.518 | 1.00 | 0.00 |
| ATOM | 1355 | HB2 | ARG | 85 | 4.175  | -6.726 | 11.426 | 1.00 | 0.00 |
| ATOM | 1356 | HB3 | ARG | 85 | 4.227  | -8.345 | 10.689 | 1.00 | 0.00 |
| ATOM | 1357 | CG  | ARG | 85 | 5.877  | -7.067 | 10.148 | 1.00 | 0.00 |

|      |      |          |    |       |         |        |      |      |
|------|------|----------|----|-------|---------|--------|------|------|
| ATOM | 1358 | HG2 ARG  | 85 | 6.132 | -7.685  | 9.287  | 1.00 | 0.00 |
| ATOM | 1359 | HG3 ARG  | 85 | 6.042 | -6.018  | 9.904  | 1.00 | 0.00 |
| ATOM | 1360 | CD ARG   | 85 | 6.760 | -7.459  | 11.335 | 1.00 | 0.00 |
| ATOM | 1361 | HD2 ARG  | 85 | 7.799 | -7.204  | 11.126 | 1.00 | 0.00 |
| ATOM | 1362 | HD3 ARG  | 85 | 6.431 | -6.935  | 12.233 | 1.00 | 0.00 |
| ATOM | 1363 | NE ARG   | 85 | 6.671 | -8.898  | 11.574 | 1.00 | 0.00 |
| ATOM | 1364 | HE ARG   | 85 | 6.684 | -9.538  | 10.793 | 1.00 | 0.00 |
| ATOM | 1365 | CZ ARG   | 85 | 6.568 | -9.400  | 12.805 | 1.00 | 0.00 |
| ATOM | 1366 | NH1 ARG  | 85 | 6.557 | -8.610  | 13.846 | 1.00 | 0.00 |
| ATOM | 1367 | HH11 ARG | 85 | 6.627 | -7.611  | 13.719 | 1.00 | 0.00 |
| ATOM | 1368 | HH12 ARG | 85 | 6.479 | -9.003  | 14.774 | 1.00 | 0.00 |
| ATOM | 1369 | NH2 ARG  | 85 | 6.482 | -10.691 | 12.972 | 1.00 | 0.00 |
| ATOM | 1370 | HH21 ARG | 85 | 6.494 | -11.303 | 12.169 | 1.00 | 0.00 |
| ATOM | 1371 | HH22 ARG | 85 | 6.404 | -11.073 | 13.904 | 1.00 | 0.00 |
| ATOM | 1372 | C ARG    | 85 | 3.859 | -7.524  | 8.088  | 1.00 | 0.00 |
| ATOM | 1373 | O ARG    | 85 | 4.483 | -6.953  | 7.194  | 1.00 | 0.00 |
| ATOM | 1374 | N ARG    | 86 | 3.432 | -8.780  | 7.990  | 1.00 | 0.00 |
| ATOM | 1375 | H ARG    | 86 | 2.939 | -9.215  | 8.757  | 1.00 | 0.00 |
| ATOM | 1376 | CA ARG   | 86 | 3.683 | -9.572  | 6.792  | 1.00 | 0.00 |
| ATOM | 1377 | HA ARG   | 86 | 4.755 | -9.641  | 6.606  | 1.00 | 0.00 |
| ATOM | 1378 | CB ARG   | 86 | 3.127 | -10.986 | 6.979  | 1.00 | 0.00 |
| ATOM | 1379 | HB2 ARG  | 86 | 2.063 | -10.932 | 7.207  | 1.00 | 0.00 |

|      |      |      |     |    |       |         |        |      |      |
|------|------|------|-----|----|-------|---------|--------|------|------|
| ATOM | 1380 | HB3  | ARG | 86 | 3.274 | -11.559 | 6.064  | 1.00 | 0.00 |
| ATOM | 1381 | CG   | ARG | 86 | 3.862 | -11.673 | 8.134  | 1.00 | 0.00 |
| ATOM | 1382 | HG2  | ARG | 86 | 4.931 | -11.691 | 7.921  | 1.00 | 0.00 |
| ATOM | 1383 | HG3  | ARG | 86 | 3.685 | -11.118 | 9.055  | 1.00 | 0.00 |
| ATOM | 1384 | CD   | ARG | 86 | 3.351 | -13.105 | 8.297  | 1.00 | 0.00 |
| ATOM | 1385 | HD2  | ARG | 86 | 2.263 | -13.107 | 8.351  | 1.00 | 0.00 |
| ATOM | 1386 | HD3  | ARG | 86 | 3.674 | -13.713 | 7.452  | 1.00 | 0.00 |
| ATOM | 1387 | NE   | ARG | 86 | 3.881 | -13.692 | 9.524  | 1.00 | 0.00 |
| ATOM | 1388 | HE   | ARG | 86 | 4.609 | -13.216 | 10.038 | 1.00 | 0.00 |
| ATOM | 1389 | CZ   | ARG | 86 | 3.425 | -14.851 | 9.994  | 1.00 | 0.00 |
| ATOM | 1390 | NH1  | ARG | 86 | 2.488 | -15.498 | 9.354  | 1.00 | 0.00 |
| ATOM | 1391 | HH11 | ARG | 86 | 2.109 | -15.117 | 8.499  | 1.00 | 0.00 |
| ATOM | 1392 | HH12 | ARG | 86 | 2.148 | -16.377 | 9.717  | 1.00 | 0.00 |
| ATOM | 1393 | NH2  | ARG | 86 | 3.918 | -15.344 | 11.096 | 1.00 | 0.00 |
| ATOM | 1394 | HH21 | ARG | 86 | 4.645 | -14.844 | 11.589 | 1.00 | 0.00 |
| ATOM | 1395 | HH22 | ARG | 86 | 3.572 | -16.224 | 11.452 | 1.00 | 0.00 |
| ATOM | 1396 | C    | ARG | 86 | 3.027 | -8.909  | 5.582  | 1.00 | 0.00 |
| ATOM | 1397 | O    | ARG | 86 | 3.581 | -8.901  | 4.482  | 1.00 | 0.00 |
| ATOM | 1398 | N    | MET | 87 | 1.835 | -8.353  | 5.810  | 1.00 | 0.00 |
| ATOM | 1399 | H    | MET | 87 | 1.427 | -8.405  | 6.733  | 1.00 | 0.00 |
| ATOM | 1400 | CA   | MET | 87 | 1.080 | -7.680  | 4.755  | 1.00 | 0.00 |
| ATOM | 1401 | HA   | MET | 87 | 0.804 | -8.395  | 3.980  | 1.00 | 0.00 |

|      |      |     |     |    |        |        |       |      |      |
|------|------|-----|-----|----|--------|--------|-------|------|------|
| ATOM | 1402 | CB  | MET | 87 | -0.200 | -7.068 | 5.335 | 1.00 | 0.00 |
| ATOM | 1403 | HB2 | MET | 87 | -0.723 | -7.820 | 5.926 | 1.00 | 0.00 |
| ATOM | 1404 | HB3 | MET | 87 | 0.061  | -6.223 | 5.972 | 1.00 | 0.00 |
| ATOM | 1405 | CG  | MET | 87 | -1.108 | -6.590 | 4.197 | 1.00 | 0.00 |
| ATOM | 1406 | HG2 | MET | 87 | -0.500 | -6.178 | 3.392 | 1.00 | 0.00 |
| ATOM | 1407 | HG3 | MET | 87 | -1.692 | -7.429 | 3.818 | 1.00 | 0.00 |
| ATOM | 1408 | SD  | MET | 87 | -2.233 | -5.309 | 4.810 | 1.00 | 0.00 |
| ATOM | 1409 | CE  | MET | 87 | -3.268 | -6.364 | 5.853 | 1.00 | 0.00 |
| ATOM | 1410 | HE1 | MET | 87 | -2.651 | -6.837 | 6.618 | 1.00 | 0.00 |
| ATOM | 1411 | HE2 | MET | 87 | -4.038 | -5.759 | 6.332 | 1.00 | 0.00 |
| ATOM | 1412 | HE3 | MET | 87 | -3.738 | -7.133 | 5.240 | 1.00 | 0.00 |
| ATOM | 1413 | C   | MET | 87 | 1.905  | -6.575 | 4.100 | 1.00 | 0.00 |
| ATOM | 1414 | O   | MET | 87 | 1.716  | -6.272 | 2.924 | 1.00 | 0.00 |
| ATOM | 1415 | N   | MET | 88 | 2.803  | -5.959 | 4.869 | 1.00 | 0.00 |
| ATOM | 1416 | H   | MET | 88 | 2.926  | -6.228 | 5.835 | 1.00 | 0.00 |
| ATOM | 1417 | CA  | MET | 88 | 3.623  | -4.871 | 4.344 | 1.00 | 0.00 |
| ATOM | 1418 | HA  | MET | 88 | 3.017  | -3.979 | 4.190 | 1.00 | 0.00 |
| ATOM | 1419 | CB  | MET | 88 | 4.729  | -4.543 | 5.347 | 1.00 | 0.00 |
| ATOM | 1420 | HB2 | MET | 88 | 5.281  | -5.452 | 5.588 | 1.00 | 0.00 |
| ATOM | 1421 | HB3 | MET | 88 | 5.409  | -3.812 | 4.910 | 1.00 | 0.00 |
| ATOM | 1422 | CG  | MET | 88 | 4.112  | -3.966 | 6.627 | 1.00 | 0.00 |
| ATOM | 1423 | HG2 | MET | 88 | 3.812  | -2.932 | 6.457 | 1.00 | 0.00 |

|      |      |         |    |       |        |       |      |      |
|------|------|---------|----|-------|--------|-------|------|------|
| ATOM | 1424 | HG3 MET | 88 | 3.240 | -4.555 | 6.913 | 1.00 | 0.00 |
| ATOM | 1425 | SD MET  | 88 | 5.331 | -4.020 | 7.965 | 1.00 | 0.00 |
| ATOM | 1426 | CE MET  | 88 | 6.760 | -3.470 | 7.003 | 1.00 | 0.00 |
| ATOM | 1427 | HE1 MET | 88 | 6.565 | -2.478 | 6.596 | 1.00 | 0.00 |
| ATOM | 1428 | HE2 MET | 88 | 7.639 | -3.431 | 7.647 | 1.00 | 0.00 |
| ATOM | 1429 | HE3 MET | 88 | 6.940 | -4.169 | 6.186 | 1.00 | 0.00 |
| ATOM | 1430 | C MET   | 88 | 4.249 | -5.258 | 3.009 | 1.00 | 0.00 |
| ATOM | 1431 | O MET   | 88 | 4.110 | -4.538 | 2.020 | 1.00 | 0.00 |
| ATOM | 1432 | N ARG   | 89 | 4.920 | -6.405 | 2.980 | 1.00 | 0.00 |
| ATOM | 1433 | H ARG   | 89 | 5.031 | -6.961 | 3.816 | 1.00 | 0.00 |
| ATOM | 1434 | CA ARG  | 89 | 5.540 | -6.878 | 1.749 | 1.00 | 0.00 |
| ATOM | 1435 | HA ARG  | 89 | 6.264 | -6.146 | 1.390 | 1.00 | 0.00 |
| ATOM | 1436 | CB ARG  | 89 | 6.268 | -8.202 | 2.003 | 1.00 | 0.00 |
| ATOM | 1437 | HB2 ARG | 89 | 5.563 | -8.933 | 2.399 | 1.00 | 0.00 |
| ATOM | 1438 | HB3 ARG | 89 | 6.686 | -8.571 | 1.067 | 1.00 | 0.00 |
| ATOM | 1439 | CG ARG  | 89 | 7.399 | -7.983 | 3.016 | 1.00 | 0.00 |
| ATOM | 1440 | HG2 ARG | 89 | 7.007 | -7.461 | 3.889 | 1.00 | 0.00 |
| ATOM | 1441 | HG3 ARG | 89 | 7.803 | -8.948 | 3.322 | 1.00 | 0.00 |
| ATOM | 1442 | CD ARG  | 89 | 8.510 | -7.144 | 2.376 | 1.00 | 0.00 |
| ATOM | 1443 | HD2 ARG | 89 | 8.861 | -7.629 | 1.465 | 1.00 | 0.00 |
| ATOM | 1444 | HD3 ARG | 89 | 8.131 | -6.151 | 2.136 | 1.00 | 0.00 |
| ATOM | 1445 | NE ARG  | 89 | 9.635 | -7.005 | 3.295 | 1.00 | 0.00 |

|      |      |      |     |    |        |         |        |      |      |
|------|------|------|-----|----|--------|---------|--------|------|------|
| ATOM | 1446 | HE   | ARG | 89 | 10.445 | -7.601  | 3.197  | 1.00 | 0.00 |
| ATOM | 1447 | CZ   | ARG | 89 | 9.626  | -6.101  | 4.273  | 1.00 | 0.00 |
| ATOM | 1448 | NH1  | ARG | 89 | 8.589  | -5.324  | 4.440  | 1.00 | 0.00 |
| ATOM | 1449 | HH11 | ARG | 89 | 7.793  | -5.411  | 3.825  | 1.00 | 0.00 |
| ATOM | 1450 | HH12 | ARG | 89 | 8.589  | -4.641  | 5.184  | 1.00 | 0.00 |
| ATOM | 1451 | NH2  | ARG | 89 | 10.654 | -5.993  | 5.067  | 1.00 | 0.00 |
| ATOM | 1452 | HH21 | ARG | 89 | 11.454 | -6.596  | 4.938  | 1.00 | 0.00 |
| ATOM | 1453 | HH22 | ARG | 89 | 10.646 | -5.307  | 5.809  | 1.00 | 0.00 |
| ATOM | 1454 | C    | ARG | 89 | 4.479  | -7.065  | 0.667  | 1.00 | 0.00 |
| ATOM | 1455 | O    | ARG | 89 | 4.671  | -6.671  | -0.484 | 1.00 | 0.00 |
| ATOM | 1456 | N    | LEU | 90 | 3.353  | -7.660  | 1.058  | 1.00 | 0.00 |
| ATOM | 1457 | H    | LEU | 90 | 3.255  | -7.976  | 2.012  | 1.00 | 0.00 |
| ATOM | 1458 | CA   | LEU | 90 | 2.249  | -7.893  | 0.135  | 1.00 | 0.00 |
| ATOM | 1459 | HA   | LEU | 90 | 2.583  | -8.494  | -0.711 | 1.00 | 0.00 |
| ATOM | 1460 | CB   | LEU | 90 | 1.130  | -8.649  | 0.861  | 1.00 | 0.00 |
| ATOM | 1461 | HB2  | LEU | 90 | 1.547  | -9.526  | 1.357  | 1.00 | 0.00 |
| ATOM | 1462 | HB3  | LEU | 90 | 0.685  | -7.989  | 1.606  | 1.00 | 0.00 |
| ATOM | 1463 | CG   | LEU | 90 | 0.054  | -9.090  | -0.140 | 1.00 | 0.00 |
| ATOM | 1464 | HG   | LEU | 90 | 0.512  | -9.264  | -1.113 | 1.00 | 0.00 |
| ATOM | 1465 | CD1  | LEU | 90 | -0.602 | -10.383 | 0.353  | 1.00 | 0.00 |
| ATOM | 1466 | HD11 | LEU | 90 | -1.060 | -10.210 | 1.327  | 1.00 | 0.00 |
| ATOM | 1467 | HD12 | LEU | 90 | -1.366 | -10.697 | -0.357 | 1.00 | 0.00 |

|      |      |      |     |    |        |         |        |      |      |
|------|------|------|-----|----|--------|---------|--------|------|------|
| ATOM | 1468 | HD13 | LEU | 90 | 0.154  | -11.164 | 0.442  | 1.00 | 0.00 |
| ATOM | 1469 | CD2  | LEU | 90 | -1.016 | -7.998  | -0.259 | 1.00 | 0.00 |
| ATOM | 1470 | HD21 | LEU | 90 | -0.555 | -7.074  | -0.606 | 1.00 | 0.00 |
| ATOM | 1471 | HD22 | LEU | 90 | -1.779 | -8.313  | -0.970 | 1.00 | 0.00 |
| ATOM | 1472 | HD23 | LEU | 90 | -1.475 | -7.831  | 0.716  | 1.00 | 0.00 |
| ATOM | 1473 | C    | LEU | 90 | 1.714  | -6.570  | -0.403 | 1.00 | 0.00 |
| ATOM | 1474 | O    | LEU | 90 | 1.389  | -6.454  | -1.585 | 1.00 | 0.00 |
| ATOM | 1475 | N    | ALA | 91 | 1.619  | -5.579  | 0.480  | 1.00 | 0.00 |
| ATOM | 1476 | H    | ALA | 91 | 1.880  | -5.729  | 1.445  | 1.00 | 0.00 |
| ATOM | 1477 | CA   | ALA | 91 | 1.114  | -4.267  | 0.096  | 1.00 | 0.00 |
| ATOM | 1478 | HA   | ALA | 91 | 0.074  | -4.342  | -0.221 | 1.00 | 0.00 |
| ATOM | 1479 | CB   | ALA | 91 | 1.195  | -3.307  | 1.286  | 1.00 | 0.00 |
| ATOM | 1480 | HB1  | ALA | 91 | 2.232  | -3.215  | 1.610  | 1.00 | 0.00 |
| ATOM | 1481 | HB2  | ALA | 91 | 0.820  | -2.328  | 0.990  | 1.00 | 0.00 |
| ATOM | 1482 | HB3  | ALA | 91 | 0.592  | -3.694  | 2.108  | 1.00 | 0.00 |
| ATOM | 1483 | C    | ALA | 91 | 1.916  | -3.708  | -1.071 | 1.00 | 0.00 |
| ATOM | 1484 | O    | ALA | 91 | 1.349  | -3.305  | -2.080 | 1.00 | 0.00 |
| ATOM | 1485 | N    | GLU | 92 | 3.238  | -3.696  | -0.923 | 1.00 | 0.00 |
| ATOM | 1486 | H    | GLU | 92 | 3.651  | -4.017  | -0.059 | 1.00 | 0.00 |
| ATOM | 1487 | CA   | GLU | 92 | 4.126  | -3.196  | -1.972 | 1.00 | 0.00 |
| ATOM | 1488 | HA   | GLU | 92 | 3.891  | -2.157  | -2.201 | 1.00 | 0.00 |
| ATOM | 1489 | CB   | GLU | 92 | 5.580  | -3.275  | -1.498 | 1.00 | 0.00 |



|      |      |      |     |    |       |        |        |      |      |
|------|------|------|-----|----|-------|--------|--------|------|------|
| ATOM | 1490 | HB2  | GLU | 92 | 5.673 | -2.773 | -0.535 | 1.00 | 0.00 |
| ATOM | 1491 | HB3  | GLU | 92 | 5.869 | -4.321 | -1.391 | 1.00 | 0.00 |
| ATOM | 1492 | CG   | GLU | 92 | 6.499 | -2.593 | -2.521 | 1.00 | 0.00 |
| ATOM | 1493 | HG2  | GLU | 92 | 6.347 | -3.056 | -3.496 | 1.00 | 0.00 |
| ATOM | 1494 | HG3  | GLU | 92 | 6.240 | -1.536 | -2.576 | 1.00 | 0.00 |
| ATOM | 1495 | CD   | GLU | 92 | 7.966 | -2.737 | -2.112 | 1.00 | 0.00 |
| ATOM | 1496 | OE1  | GLU | 92 | 8.229 | -3.373 | -1.101 | 1.00 | 0.00 |
| ATOM | 1497 | OE2  | GLU | 92 | 8.808 | -2.209 | -2.818 | 1.00 | 0.00 |
| ATOM | 1498 | C    | GLU | 92 | 3.958 | -3.998 | -3.262 | 1.00 | 0.00 |
| ATOM | 1499 | O    | GLU | 92 | 4.151 | -3.471 | -4.357 | 1.00 | 0.00 |
| ATOM | 1500 | N    | ASN | 93 | 3.614 | -5.276 | -3.123 | 1.00 | 0.00 |
| ATOM | 1501 | H    | ASN | 93 | 3.489 | -5.675 | -2.203 | 1.00 | 0.00 |
| ATOM | 1502 | CA   | ASN | 93 | 3.442 | -6.147 | -4.286 | 1.00 | 0.00 |
| ATOM | 1503 | HA   | ASN | 93 | 4.304 | -6.061 | -4.948 | 1.00 | 0.00 |
| ATOM | 1504 | CB   | ASN | 93 | 3.315 | -7.606 | -3.834 | 1.00 | 0.00 |
| ATOM | 1505 | HB2  | ASN | 93 | 2.493 | -7.704 | -3.125 | 1.00 | 0.00 |
| ATOM | 1506 | HB3  | ASN | 93 | 3.130 | -8.248 | -4.695 | 1.00 | 0.00 |
| ATOM | 1507 | CG   | ASN | 93 | 4.604 | -8.064 | -3.152 | 1.00 | 0.00 |
| ATOM | 1508 | OD1  | ASN | 93 | 5.619 | -7.248 | -3.064 | 1.00 | 0.00 |
| ATOM | 1509 | ND2  | ASN | 93 | 4.686 | -9.201 | -2.687 | 1.00 | 0.00 |
| ATOM | 1510 | HD21 | ASN | 93 | 5.540 | -9.499 | -2.237 | 1.00 | 0.00 |
| ATOM | 1511 | HD22 | ASN | 93 | 3.899 | -9.830 | -2.757 | 1.00 | 0.00 |

|      |      |      |     |    |        |        |        |      |      |
|------|------|------|-----|----|--------|--------|--------|------|------|
| ATOM | 1512 | C    | ASN | 93 | 2.207  | -5.757 | -5.099 | 1.00 | 0.00 |
| ATOM | 1513 | O    | ASN | 93 | 2.208  | -5.870 | -6.325 | 1.00 | 0.00 |
| ATOM | 1514 | N    | ILE | 94 | 1.155  | -5.305 | -4.416 | 1.00 | 0.00 |
| ATOM | 1515 | H    | ILE | 94 | 1.177  | -5.263 | -3.407 | 1.00 | 0.00 |
| ATOM | 1516 | CA   | ILE | 94 | -0.077 | -4.913 | -5.100 | 1.00 | 0.00 |
| ATOM | 1517 | HA   | ILE | 94 | -0.526 | -5.792 | -5.563 | 1.00 | 0.00 |
| ATOM | 1518 | CB   | ILE | 94 | -1.065 | -4.303 | -4.093 | 1.00 | 0.00 |
| ATOM | 1519 | HB   | ILE | 94 | -0.517 | -3.675 | -3.390 | 1.00 | 0.00 |
| ATOM | 1520 | CG2  | ILE | 94 | -2.113 | -3.456 | -4.826 | 1.00 | 0.00 |
| ATOM | 1521 | HG21 | ILE | 94 | -2.661 | -4.084 | -5.528 | 1.00 | 0.00 |
| ATOM | 1522 | HG22 | ILE | 94 | -2.807 | -3.030 | -4.102 | 1.00 | 0.00 |
| ATOM | 1523 | HG23 | ILE | 94 | -1.616 | -2.653 | -5.369 | 1.00 | 0.00 |
| ATOM | 1524 | CG1  | ILE | 94 | -1.769 | -5.434 | -3.331 | 1.00 | 0.00 |
| ATOM | 1525 | HG12 | ILE | 94 | -2.557 | -5.855 | -3.955 | 1.00 | 0.00 |
| ATOM | 1526 | HG13 | ILE | 94 | -1.044 | -6.212 | -3.087 | 1.00 | 0.00 |
| ATOM | 1527 | CD1  | ILE | 94 | -2.381 | -4.884 | -2.039 | 1.00 | 0.00 |
| ATOM | 1528 | HD11 | ILE | 94 | -3.105 | -4.107 | -2.281 | 1.00 | 0.00 |
| ATOM | 1529 | HD12 | ILE | 94 | -2.880 | -5.690 | -1.501 | 1.00 | 0.00 |
| ATOM | 1530 | HD13 | ILE | 94 | -1.593 | -4.464 | -1.413 | 1.00 | 0.00 |
| ATOM | 1531 | C    | ILE | 94 | 0.219  | -3.922 | -6.234 | 1.00 | 0.00 |
| ATOM | 1532 | O    | ILE | 94 | -0.134 | -4.172 | -7.386 | 1.00 | 0.00 |
| ATOM | 1533 | N    | PRO | 95 | 0.859  | -2.817 | -5.938 | 1.00 | 0.00 |

|      |      |     |     |    |       |        |        |      |      |
|------|------|-----|-----|----|-------|--------|--------|------|------|
| ATOM | 1534 | CD  | PRO | 95 | 1.315 | -2.421 | -4.597 | 1.00 | 0.00 |
| ATOM | 1535 | HD2 | PRO | 95 | 1.886 | -3.240 | -4.159 | 1.00 | 0.00 |
| ATOM | 1536 | HD3 | PRO | 95 | 0.446 | -2.211 | -3.973 | 1.00 | 0.00 |
| ATOM | 1537 | CG  | PRO | 95 | 2.167 | -1.180 | -4.845 | 1.00 | 0.00 |
| ATOM | 1538 | HG2 | PRO | 95 | 3.217 | -1.469 | -4.906 | 1.00 | 0.00 |
| ATOM | 1539 | HG3 | PRO | 95 | 2.032 | -0.478 | -4.022 | 1.00 | 0.00 |
| ATOM | 1540 | CB  | PRO | 95 | 1.688 | -0.595 | -6.127 | 1.00 | 0.00 |
| ATOM | 1541 | HB2 | PRO | 95 | 2.518 | -0.101 | -6.631 | 1.00 | 0.00 |
| ATOM | 1542 | HB3 | PRO | 95 | 0.873 | 0.114  | -5.988 | 1.00 | 0.00 |
| ATOM | 1543 | CA  | PRO | 95 | 1.208 | -1.786 | -6.960 | 1.00 | 0.00 |
| ATOM | 1544 | HA  | PRO | 95 | 0.305 | -1.558 | -7.526 | 1.00 | 0.00 |
| ATOM | 1545 | C   | PRO | 95 | 2.306 | -2.250 | -7.919 | 1.00 | 0.00 |
| ATOM | 1546 | O   | PRO | 95 | 2.401 | -1.755 | -9.038 | 1.00 | 0.00 |
| ATOM | 1547 | N   | SER | 96 | 3.125 | -3.210 | -7.479 | 1.00 | 0.00 |
| ATOM | 1548 | H   | SER | 96 | 3.019 | -3.584 | -6.547 | 1.00 | 0.00 |
| ATOM | 1549 | CA  | SER | 96 | 4.200 | -3.736 | -8.319 | 1.00 | 0.00 |
| ATOM | 1550 | HA  | SER | 96 | 4.861 | -2.924 | -8.622 | 1.00 | 0.00 |
| ATOM | 1551 | CB  | SER | 96 | 5.022 | -4.776 | -7.555 | 1.00 | 0.00 |
| ATOM | 1552 | HB2 | SER | 96 | 4.381 | -5.611 | -7.271 | 1.00 | 0.00 |
| ATOM | 1553 | HB3 | SER | 96 | 5.831 | -5.139 | -8.189 | 1.00 | 0.00 |
| ATOM | 1554 | OG  | SER | 96 | 5.567 | -4.180 | -6.387 | 1.00 | 0.00 |
| ATOM | 1555 | HG  | SER | 96 | 6.083 | -4.832 | -5.906 | 1.00 | 0.00 |

|      |      |      |     |    |        |        |         |      |      |
|------|------|------|-----|----|--------|--------|---------|------|------|
| ATOM | 1556 | C    | SER | 96 | 3.587  | -4.366 | -9.542  | 1.00 | 0.00 |
| ATOM | 1557 | O    | SER | 96 | 4.063  | -4.216 | -10.668 | 1.00 | 0.00 |
| ATOM | 1558 | N    | ARG | 97 | 2.506  | -5.065 | -9.273  | 1.00 | 0.00 |
| ATOM | 1559 | H    | ARG | 97 | 2.205  | -5.144 | -8.312  | 1.00 | 0.00 |
| ATOM | 1560 | CA   | ARG | 97 | 1.744  | -5.748 | -10.285 | 1.00 | 0.00 |
| ATOM | 1561 | HA   | ARG | 97 | 2.336  | -6.529 | -10.763 | 1.00 | 0.00 |
| ATOM | 1562 | CB   | ARG | 97 | 0.545  | -6.395 | -9.604  | 1.00 | 0.00 |
| ATOM | 1563 | HB2  | ARG | 97 | 0.086  | -5.679 | -8.923  | 1.00 | 0.00 |
| ATOM | 1564 | HB3  | ARG | 97 | -0.181 | -6.694 | -10.359 | 1.00 | 0.00 |
| ATOM | 1565 | CG   | ARG | 97 | 1.000  | -7.629 | -8.816  | 1.00 | 0.00 |
| ATOM | 1566 | HG2  | ARG | 97 | 1.539  | -8.304 | -9.481  | 1.00 | 0.00 |
| ATOM | 1567 | HG3  | ARG | 97 | 1.659  | -7.317 | -8.005  | 1.00 | 0.00 |
| ATOM | 1568 | CD   | ARG | 97 | -0.217 | -8.352 | -8.234  | 1.00 | 0.00 |
| ATOM | 1569 | HD2  | ARG | 97 | -0.856 | -8.709 | -9.042  | 1.00 | 0.00 |
| ATOM | 1570 | HD3  | ARG | 97 | 0.110  | -9.198 | -7.629  | 1.00 | 0.00 |
| ATOM | 1571 | NE   | ARG | 97 | -0.992 | -7.445 | -7.390  | 1.00 | 0.00 |
| ATOM | 1572 | HE   | ARG | 97 | -0.725 | -7.305 | -6.426  | 1.00 | 0.00 |
| ATOM | 1573 | CZ   | ARG | 97 | -2.053 | -6.789 | -7.858  | 1.00 | 0.00 |
| ATOM | 1574 | NH1  | ARG | 97 | -2.439 | -6.950 | -9.096  | 1.00 | 0.00 |
| ATOM | 1575 | HH11 | ARG | 97 | -1.929 | -7.576 | -9.703  | 1.00 | 0.00 |
| ATOM | 1576 | HH12 | ARG | 97 | -3.244 | -6.448 | -9.440  | 1.00 | 0.00 |
| ATOM | 1577 | NH2  | ARG | 97 | -2.710 | -5.980 | -7.075  | 1.00 | 0.00 |

|      |      |      |     |    |        |        |         |      |      |
|------|------|------|-----|----|--------|--------|---------|------|------|
| ATOM | 1578 | HH21 | ARG | 97 | -2.411 | -5.855 | -6.118  | 1.00 | 0.00 |
| ATOM | 1579 | HH22 | ARG | 97 | -3.514 | -5.482 | -7.428  | 1.00 | 0.00 |
| ATOM | 1580 | C    | ARG | 97 | 1.279  | -4.791 | -11.382 | 1.00 | 0.00 |
| ATOM | 1581 | O    | ARG | 97 | 1.223  | -5.165 | -12.554 | 1.00 | 0.00 |
| ATOM | 1582 | N    | CYX | 98 | 0.956  | -3.556 | -10.999 | 1.00 | 0.00 |
| ATOM | 1583 | H    | CYX | 98 | 1.020  | -3.288 | -10.027 | 1.00 | 0.00 |
| ATOM | 1584 | CA   | CYX | 98 | 0.509  | -2.561 | -11.961 | 1.00 | 0.00 |
| ATOM | 1585 | HA   | CYX | 98 | 0.194  | -3.059 | -12.878 | 1.00 | 0.00 |
| ATOM | 1586 | CB   | CYX | 98 | -0.667 | -1.754 | -11.414 | 1.00 | 0.00 |
| ATOM | 1587 | HB2  | CYX | 98 | -0.301 | -0.817 | -10.994 | 1.00 | 0.00 |
| ATOM | 1588 | HB3  | CYX | 98 | -1.368 | -1.541 | -12.220 | 1.00 | 0.00 |
| ATOM | 1589 | SG   | CYX | 98 | -1.496 | -2.688 | -10.101 | 1.00 | 0.00 |
| ATOM | 1590 | C    | CYX | 98 | 1.629  | -1.602 | -12.275 | 1.00 | 0.00 |
| ATOM | 1591 | O    | CYX | 98 | 1.512  | -0.786 | -13.189 | 1.00 | 0.00 |
| ATOM | 1592 | N    | ASN | 99 | 2.702  | -1.668 | -11.493 | 1.00 | 0.00 |
| ATOM | 1593 | H    | ASN | 99 | 2.751  | -2.299 | -10.705 | 1.00 | 0.00 |
| ATOM | 1594 | CA   | ASN | 99 | 3.797  | -0.751 | -11.704 | 1.00 | 0.00 |
| ATOM | 1595 | HA   | ASN | 99 | 3.416  | 0.263  | -11.584 | 1.00 | 0.00 |
| ATOM | 1596 | CB   | ASN | 99 | 4.954  | -0.946 | -10.755 | 1.00 | 0.00 |
| ATOM | 1597 | HB2  | ASN | 99 | 5.089  | -2.003 | -10.526 | 1.00 | 0.00 |
| ATOM | 1598 | HB3  | ASN | 99 | 5.869  | -0.551 | -11.197 | 1.00 | 0.00 |
| ATOM | 1599 | CG   | ASN | 99 | 4.678  | -0.198 | -9.456  | 1.00 | 0.00 |

|      |      |      |     |     |       |        |         |      |      |
|------|------|------|-----|-----|-------|--------|---------|------|------|
| ATOM | 1600 | OD1  | ASN | 99  | 4.974 | -0.695 | -8.370  | 1.00 | 0.00 |
| ATOM | 1601 | ND2  | ASN | 99  | 4.128 | 0.986  | -9.511  | 1.00 | 0.00 |
| ATOM | 1602 | HD21 | ASN | 99  | 3.940 | 1.492  | -8.657  | 1.00 | 0.00 |
| ATOM | 1603 | HD22 | ASN | 99  | 3.894 | 1.389  | -10.406 | 1.00 | 0.00 |
| ATOM | 1604 | C    | ASN | 99  | 4.293 | -0.812 | -13.115 | 1.00 | 0.00 |
| ATOM | 1605 | O    | ASN | 99  | 4.121 | -1.798 | -13.835 | 1.00 | 0.00 |
| ATOM | 1606 | N    | LEU | 100 | 4.822 | 0.313  | -13.510 | 1.00 | 0.00 |
| ATOM | 1607 | H    | LEU | 100 | 4.924 | 1.072  | -12.851 | 1.00 | 0.00 |
| ATOM | 1608 | CA   | LEU | 100 | 5.269 | 0.518  | -14.862 | 1.00 | 0.00 |
| ATOM | 1609 | HA   | LEU | 100 | 5.597 | -0.412 | -15.326 | 1.00 | 0.00 |
| ATOM | 1610 | CB   | LEU | 100 | 4.059 | 1.053  | -15.637 | 1.00 | 0.00 |
| ATOM | 1611 | HB2  | LEU | 100 | 4.375 | 1.923  | -16.212 | 1.00 | 0.00 |
| ATOM | 1612 | HB3  | LEU | 100 | 3.660 | 0.296  | -16.312 | 1.00 | 0.00 |
| ATOM | 1613 | CG   | LEU | 100 | 2.959 | 1.474  | -14.624 | 1.00 | 0.00 |
| ATOM | 1614 | HG   | LEU | 100 | 2.960 | 0.781  | -13.782 | 1.00 | 0.00 |
| ATOM | 1615 | CD1  | LEU | 100 | 3.234 | 2.890  | -14.118 | 1.00 | 0.00 |
| ATOM | 1616 | HD11 | LEU | 100 | 3.233 | 3.583  | -14.959 | 1.00 | 0.00 |
| ATOM | 1617 | HD12 | LEU | 100 | 2.460 | 3.179  | -13.408 | 1.00 | 0.00 |
| ATOM | 1618 | HD13 | LEU | 100 | 4.206 | 2.918  | -13.625 | 1.00 | 0.00 |
| ATOM | 1619 | CD2  | LEU | 100 | 1.588 | 1.407  | -15.280 | 1.00 | 0.00 |
| ATOM | 1620 | HD21 | LEU | 100 | 1.394 | 0.387  | -15.614 | 1.00 | 0.00 |
| ATOM | 1621 | HD22 | LEU | 100 | 0.826 | 1.704  | -14.560 | 1.00 | 0.00 |

|      |      |      |     |     |        |       |         |      |      |
|------|------|------|-----|-----|--------|-------|---------|------|------|
| ATOM | 1622 | HD23 | LEU | 100 | 1.561  | 2.081 | -16.136 | 1.00 | 0.00 |
| ATOM | 1623 | C    | LEU | 100 | 6.418  | 1.521 | -14.892 | 1.00 | 0.00 |
| ATOM | 1624 | O    | LEU | 100 | 6.392  | 2.515 | -14.169 | 1.00 | 0.00 |
| ATOM | 1625 | N    | SER | 101 | 7.422  | 1.240 | -15.726 | 1.00 | 0.00 |
| ATOM | 1626 | H    | SER | 101 | 7.388  | 0.396 | -16.280 | 1.00 | 0.00 |
| ATOM | 1627 | CA   | SER | 101 | 8.598  | 2.106 | -15.851 | 1.00 | 0.00 |
| ATOM | 1628 | HA   | SER | 101 | 9.335  | 1.853 | -15.088 | 1.00 | 0.00 |
| ATOM | 1629 | CB   | SER | 101 | 9.235  | 1.914 | -17.229 | 1.00 | 0.00 |
| ATOM | 1630 | HB2  | SER | 101 | 9.522  | 0.870 | -17.356 | 1.00 | 0.00 |
| ATOM | 1631 | HB3  | SER | 101 | 8.520  | 2.191 | -18.003 | 1.00 | 0.00 |
| ATOM | 1632 | OG   | SER | 101 | 10.389 | 2.738 | -17.333 | 1.00 | 0.00 |
| ATOM | 1633 | HG   | SER | 101 | 10.791 | 2.619 | -18.197 | 1.00 | 0.00 |
| ATOM | 1634 | C    | SER | 101 | 8.221  | 3.575 | -15.663 | 1.00 | 0.00 |
| ATOM | 1635 | O    | SER | 101 | 7.772  | 4.239 | -16.598 | 1.00 | 0.00 |
| ATOM | 1636 | N    | PRO | 102 | 8.392  | 4.084 | -14.468 | 1.00 | 0.00 |
| ATOM | 1637 | CD   | PRO | 102 | 8.906  | 3.378 | -13.298 | 1.00 | 0.00 |
| ATOM | 1638 | HD2  | PRO | 102 | 9.981  | 3.536 | -13.204 | 1.00 | 0.00 |
| ATOM | 1639 | HD3  | PRO | 102 | 8.703  | 2.310 | -13.383 | 1.00 | 0.00 |
| ATOM | 1640 | CG   | PRO | 102 | 8.119  | 4.030 | -12.173 | 1.00 | 0.00 |
| ATOM | 1641 | HG2  | PRO | 102 | 8.702  | 3.982 | -11.253 | 1.00 | 0.00 |
| ATOM | 1642 | HG3  | PRO | 102 | 7.179  | 3.495 | -12.035 | 1.00 | 0.00 |
| ATOM | 1643 | CB   | PRO | 102 | 7.871  | 5.452 | -12.593 | 1.00 | 0.00 |

|      |      |         |     |        |       |         |      |      |
|------|------|---------|-----|--------|-------|---------|------|------|
| ATOM | 1644 | HB2 PRO | 102 | 8.614  | 6.084 | -12.106 | 1.00 | 0.00 |
| ATOM | 1645 | HB3 PRO | 102 | 6.872  | 5.804 | -12.338 | 1.00 | 0.00 |
| ATOM | 1646 | CA PRO  | 102 | 8.069  | 5.492 | -14.122 | 1.00 | 0.00 |
| ATOM | 1647 | HA PRO  | 102 | 7.158  | 5.774 | -14.649 | 1.00 | 0.00 |
| ATOM | 1648 | C PRO   | 102 | 9.196  | 6.444 | -14.510 | 1.00 | 0.00 |
| ATOM | 1649 | O PRO   | 102 | 10.314 | 6.332 | -14.003 | 1.00 | 0.00 |
| ATOM | 1650 | N MET   | 103 | 8.900  | 7.376 | -15.412 | 1.00 | 0.00 |
| ATOM | 1651 | H MET   | 103 | 7.977  | 7.427 | -15.819 | 1.00 | 0.00 |
| ATOM | 1652 | CA MET  | 103 | 9.905  | 8.333 | -15.856 | 1.00 | 0.00 |
| ATOM | 1653 | HA MET  | 103 | 10.810 | 7.809 | -16.164 | 1.00 | 0.00 |
| ATOM | 1654 | CB MET  | 103 | 9.372  | 9.134 | -17.049 | 1.00 | 0.00 |
| ATOM | 1655 | HB2 MET | 103 | 8.446  | 9.632 | -16.764 | 1.00 | 0.00 |
| ATOM | 1656 | HB3 MET | 103 | 10.111 | 9.880 | -17.341 | 1.00 | 0.00 |
| ATOM | 1657 | CG MET  | 103 | 9.103  | 8.192 | -18.228 | 1.00 | 0.00 |
| ATOM | 1658 | HG2 MET | 103 | 8.316  | 7.487 | -17.960 | 1.00 | 0.00 |
| ATOM | 1659 | HG3 MET | 103 | 8.790  | 8.772 | -19.095 | 1.00 | 0.00 |
| ATOM | 1660 | SD MET  | 103 | 10.610 | 7.275 | -18.638 | 1.00 | 0.00 |
| ATOM | 1661 | CE MET  | 103 | 11.626 | 8.692 | -19.125 | 1.00 | 0.00 |
| ATOM | 1662 | HE1 MET | 103 | 11.719 | 9.379 | -18.284 | 1.00 | 0.00 |
| ATOM | 1663 | HE2 MET | 103 | 12.616 | 8.345 | -19.421 | 1.00 | 0.00 |
| ATOM | 1664 | HE3 MET | 103 | 11.156 | 9.205 | -19.963 | 1.00 | 0.00 |
| ATOM | 1665 | C MET   | 103 | 10.273 | 9.286 | -14.724 | 1.00 | 0.00 |



|      |      |      |     |     |        |        |         |      |      |
|------|------|------|-----|-----|--------|--------|---------|------|------|
| ATOM | 1666 | O    | MET | 103 | 11.439 | 9.378  | -14.335 | 1.00 | 0.00 |
| ATOM | 1667 | N    | ARG | 104 | 9.272  | 9.986  | -14.193 | 1.00 | 0.00 |
| ATOM | 1668 | H    | ARG | 104 | 8.333  | 9.893  | -14.552 | 1.00 | 0.00 |
| ATOM | 1669 | CA   | ARG | 104 | 9.504  | 10.921 | -13.096 | 1.00 | 0.00 |
| ATOM | 1670 | HA   | ARG | 104 | 10.325 | 10.570 | -12.471 | 1.00 | 0.00 |
| ATOM | 1671 | CB   | ARG | 104 | 9.871  | 12.301 | -13.658 | 1.00 | 0.00 |
| ATOM | 1672 | HB2  | ARG | 104 | 9.571  | 12.353 | -14.704 | 1.00 | 0.00 |
| ATOM | 1673 | HB3  | ARG | 104 | 9.347  | 13.070 | -13.091 | 1.00 | 0.00 |
| ATOM | 1674 | CG   | ARG | 104 | 11.385 | 12.527 | -13.548 | 1.00 | 0.00 |
| ATOM | 1675 | HG2  | ARG | 104 | 11.907 | 11.711 | -14.049 | 1.00 | 0.00 |
| ATOM | 1676 | HG3  | ARG | 104 | 11.643 | 13.471 | -14.027 | 1.00 | 0.00 |
| ATOM | 1677 | CD   | ARG | 104 | 11.804 | 12.572 | -12.073 | 1.00 | 0.00 |
| ATOM | 1678 | HD2  | ARG | 104 | 11.979 | 11.559 | -11.710 | 1.00 | 0.00 |
| ATOM | 1679 | HD3  | ARG | 104 | 12.718 | 13.157 | -11.968 | 1.00 | 0.00 |
| ATOM | 1680 | NE   | ARG | 104 | 10.758 | 13.187 | -11.259 | 1.00 | 0.00 |
| ATOM | 1681 | HE   | ARG | 104 | 10.156 | 12.607 | -10.692 | 1.00 | 0.00 |
| ATOM | 1682 | CZ   | ARG | 104 | 10.570 | 14.505 | -11.242 | 1.00 | 0.00 |
| ATOM | 1683 | NH1  | ARG | 104 | 11.333 | 15.287 | -11.958 | 1.00 | 0.00 |
| ATOM | 1684 | HH11 | ARG | 104 | 12.068 | 14.889 | -12.525 | 1.00 | 0.00 |
| ATOM | 1685 | HH12 | ARG | 104 | 11.185 | 16.286 | -11.940 | 1.00 | 0.00 |
| ATOM | 1686 | NH2  | ARG | 104 | 9.623  | 15.016 | -10.507 | 1.00 | 0.00 |
| ATOM | 1687 | HH21 | ARG | 104 | 9.035  | 14.409 | -9.953  | 1.00 | 0.00 |

|      |      |      |     |     |       |        |         |      |      |
|------|------|------|-----|-----|-------|--------|---------|------|------|
| ATOM | 1688 | HH22 | ARG | 104 | 9.482 | 16.016 | -10.495 | 1.00 | 0.00 |
| ATOM | 1689 | C    | ARG | 104 | 8.266 | 11.050 | -12.210 | 1.00 | 0.00 |
| ATOM | 1690 | O    | ARG | 104 | 7.141 | 11.107 | -12.706 | 1.00 | 0.00 |
| ATOM | 1691 | N    | CYX | 105 | 8.491 | 11.127 | -10.899 | 1.00 | 0.00 |
| ATOM | 1692 | H    | CYX | 105 | 9.433 | 11.059 | -10.540 | 1.00 | 0.00 |
| ATOM | 1693 | CA   | CYX | 105 | 7.397 | 11.287 | -9.945  | 1.00 | 0.00 |
| ATOM | 1694 | HA   | CYX | 105 | 6.444 | 11.115 | -10.444 | 1.00 | 0.00 |
| ATOM | 1695 | CB   | CYX | 105 | 7.536 | 10.283 | -8.798  | 1.00 | 0.00 |
| ATOM | 1696 | HB2  | CYX | 105 | 8.572 | 10.259 | -8.459  | 1.00 | 0.00 |
| ATOM | 1697 | HB3  | CYX | 105 | 6.891 | 10.582 | -7.972  | 1.00 | 0.00 |
| ATOM | 1698 | SG   | CYX | 105 | 7.077 | 8.629  | -9.378  | 1.00 | 0.00 |
| ATOM | 1699 | C    | CYX | 105 | 7.403 | 12.711 | -9.387  | 1.00 | 0.00 |
| ATOM | 1700 | O    | CYX | 105 | 8.312 | 13.083 | -8.645  | 1.00 | 0.00 |
| ATOM | 1701 | N    | PRO | 106 | 6.420 | 13.511 | -9.729  | 1.00 | 0.00 |
| ATOM | 1702 | CD   | PRO | 106 | 5.302 | 13.164 | -10.618 | 1.00 | 0.00 |
| ATOM | 1703 | HD2  | PRO | 106 | 4.610 | 12.511 | -10.085 | 1.00 | 0.00 |
| ATOM | 1704 | HD3  | PRO | 106 | 5.689 | 12.644 | -11.494 | 1.00 | 0.00 |
| ATOM | 1705 | CG   | PRO | 106 | 4.681 | 14.517 | -10.969 | 1.00 | 0.00 |
| ATOM | 1706 | HG2  | PRO | 106 | 3.602 | 14.398 | -11.065 | 1.00 | 0.00 |
| ATOM | 1707 | HG3  | PRO | 106 | 5.094 | 14.862 | -11.917 | 1.00 | 0.00 |
| ATOM | 1708 | CB   | PRO | 106 | 5.030 | 15.457 | -9.862  | 1.00 | 0.00 |
| ATOM | 1709 | HB2  | PRO | 106 | 4.236 | 15.460 | -9.115  | 1.00 | 0.00 |

|      |      |         |     |       |        |         |      |      |
|------|------|---------|-----|-------|--------|---------|------|------|
| ATOM | 1710 | HB3 PRO | 106 | 5.185 | 16.471 | -10.231 | 1.00 | 0.00 |
| ATOM | 1711 | CA PRO  | 106 | 6.323 | 14.924 | -9.244  | 1.00 | 0.00 |
| ATOM | 1712 | HA PRO  | 106 | 7.195 | 15.460 | -9.618  | 1.00 | 0.00 |
| ATOM | 1713 | C PRO   | 106 | 6.270 | 15.038 | -7.726  | 1.00 | 0.00 |
| ATOM | 1714 | O PRO   | 106 | 6.093 | 16.128 | -7.185  | 1.00 | 0.00 |
| ATOM | 1715 | N MET   | 107 | 6.424 | 13.915 | -7.048  | 1.00 | 0.00 |
| ATOM | 1716 | H MET   | 107 | 6.582 | 13.042 | -7.531  | 1.00 | 0.00 |
| ATOM | 1717 | CA MET  | 107 | 6.392 | 13.902 | -5.597  | 1.00 | 0.00 |
| ATOM | 1718 | HA MET  | 107 | 5.565 | 14.508 | -5.227  | 1.00 | 0.00 |
| ATOM | 1719 | CB MET  | 107 | 6.200 | 12.484 | -5.122  | 1.00 | 0.00 |
| ATOM | 1720 | HB2 MET | 107 | 6.806 | 11.818 | -5.736  | 1.00 | 0.00 |
| ATOM | 1721 | HB3 MET | 107 | 6.521 | 12.410 | -4.083  | 1.00 | 0.00 |
| ATOM | 1722 | CG MET  | 107 | 4.725 | 12.079 | -5.231  | 1.00 | 0.00 |
| ATOM | 1723 | HG2 MET | 107 | 4.646 | 11.145 | -5.788  | 1.00 | 0.00 |
| ATOM | 1724 | HG3 MET | 107 | 4.313 | 11.941 | -4.231  | 1.00 | 0.00 |
| ATOM | 1725 | SD MET  | 107 | 3.784 | 13.368 | -6.092  | 1.00 | 0.00 |
| ATOM | 1726 | CE MET  | 107 | 3.761 | 12.594 | -7.726  | 1.00 | 0.00 |
| ATOM | 1727 | HE1 MET | 107 | 3.266 | 11.625 | -7.663  | 1.00 | 0.00 |
| ATOM | 1728 | HE2 MET | 107 | 3.221 | 13.233 | -8.424  | 1.00 | 0.00 |
| ATOM | 1729 | HE3 MET | 107 | 4.784 | 12.456 | -8.077  | 1.00 | 0.00 |
| ATOM | 1730 | C MET   | 107 | 7.699 | 14.424 | -5.046  | 1.00 | 0.00 |
| ATOM | 1731 | O MET   | 107 | 8.648 | 13.671 | -4.819  | 1.00 | 0.00 |

|      |      |     |     |     |        |        |        |      |      |
|------|------|-----|-----|-----|--------|--------|--------|------|------|
| ATOM | 1732 | N   | GLY | 108 | 7.733  | 15.720 | -4.839 | 1.00 | 0.00 |
| ATOM | 1733 | H   | GLY | 108 | 6.925  | 16.290 | -5.044 | 1.00 | 0.00 |
| ATOM | 1734 | CA  | GLY | 108 | 8.916  | 16.369 | -4.316 | 1.00 | 0.00 |
| ATOM | 1735 | HA2 | GLY | 108 | 8.652  | 17.365 | -3.962 | 1.00 | 0.00 |
| ATOM | 1736 | HA3 | GLY | 108 | 9.311  | 15.782 | -3.486 | 1.00 | 0.00 |
| ATOM | 1737 | C   | GLY | 108 | 9.990  | 16.493 | -5.391 | 1.00 | 0.00 |
| ATOM | 1738 | O   | GLY | 108 | 11.182 | 16.549 | -5.087 | 1.00 | 0.00 |
| ATOM | 1739 | N   | GLY | 109 | 9.553  | 16.542 | -6.648 | 1.00 | 0.00 |
| ATOM | 1740 | H   | GLY | 109 | 8.564  | 16.491 | -6.845 | 1.00 | 0.00 |
| ATOM | 1741 | CA  | GLY | 109 | 10.478 | 16.669 | -7.771 | 1.00 | 0.00 |
| ATOM | 1742 | HA2 | GLY | 109 | 9.923  | 16.560 | -8.702 | 1.00 | 0.00 |
| ATOM | 1743 | HA3 | GLY | 109 | 10.944 | 17.654 | -7.738 | 1.00 | 0.00 |
| ATOM | 1744 | C   | GLY | 109 | 11.569 | 15.602 | -7.716 | 1.00 | 0.00 |
| ATOM | 1745 | O   | GLY | 109 | 12.740 | 15.914 | -7.495 | 1.00 | 0.00 |
| ATOM | 1746 | N   | SER | 110 | 11.178 | 14.344 | -7.920 | 1.00 | 0.00 |
| ATOM | 1747 | H   | SER | 110 | 10.204 | 14.129 | -8.076 | 1.00 | 0.00 |
| ATOM | 1748 | CA  | SER | 110 | 12.136 | 13.239 | -7.893 | 1.00 | 0.00 |
| ATOM | 1749 | HA  | SER | 110 | 12.566 | 13.142 | -6.896 | 1.00 | 0.00 |
| ATOM | 1750 | CB  | SER | 110 | 11.436 | 11.929 | -8.252 | 1.00 | 0.00 |
| ATOM | 1751 | HB2 | SER | 110 | 11.072 | 11.979 | -9.278 | 1.00 | 0.00 |
| ATOM | 1752 | HB3 | SER | 110 | 12.139 | 11.101 | -8.156 | 1.00 | 0.00 |
| ATOM | 1753 | OG  | SER | 110 | 10.340 | 11.724 | -7.369 | 1.00 | 0.00 |

|      |      |      |     |     |        |        |         |      |      |
|------|------|------|-----|-----|--------|--------|---------|------|------|
| ATOM | 1754 | HG   | SER | 110 | 9.899  | 10.901 | -7.592  | 1.00 | 0.00 |
| ATOM | 1755 | C    | SER | 110 | 13.279 | 13.500 | -8.872  | 1.00 | 0.00 |
| ATOM | 1756 | O    | SER | 110 | 13.122 | 14.251 | -9.835  | 1.00 | 0.00 |
| ATOM | 1757 | N    | ILE | 111 | 14.430 | 12.883 | -8.617  | 1.00 | 0.00 |
| ATOM | 1758 | H    | ILE | 111 | 14.528 | 12.294 | -7.802  | 1.00 | 0.00 |
| ATOM | 1759 | CA   | ILE | 111 | 15.593 | 13.067 | -9.482  | 1.00 | 0.00 |
| ATOM | 1760 | HA   | ILE | 111 | 15.503 | 14.016 | -10.010 | 1.00 | 0.00 |
| ATOM | 1761 | CB   | ILE | 111 | 16.875 | 13.071 | -8.641  | 1.00 | 0.00 |
| ATOM | 1762 | HB   | ILE | 111 | 16.971 | 12.117 | -8.121  | 1.00 | 0.00 |
| ATOM | 1763 | CG2  | ILE | 111 | 18.089 | 13.279 | -9.554  | 1.00 | 0.00 |
| ATOM | 1764 | HG21 | ILE | 111 | 17.995 | 14.232 | -10.073 | 1.00 | 0.00 |
| ATOM | 1765 | HG22 | ILE | 111 | 18.999 | 13.281 | -8.954  | 1.00 | 0.00 |
| ATOM | 1766 | HG23 | ILE | 111 | 18.138 | 12.471 | -10.284 | 1.00 | 0.00 |
| ATOM | 1767 | CG1  | ILE | 111 | 16.806 | 14.209 | -7.614  | 1.00 | 0.00 |
| ATOM | 1768 | HG12 | ILE | 111 | 16.835 | 15.167 | -8.133  | 1.00 | 0.00 |
| ATOM | 1769 | HG13 | ILE | 111 | 15.877 | 14.130 | -7.049  | 1.00 | 0.00 |
| ATOM | 1770 | CD1  | ILE | 111 | 17.996 | 14.112 | -6.655  | 1.00 | 0.00 |
| ATOM | 1771 | HD11 | ILE | 111 | 18.926 | 14.190 | -7.219  | 1.00 | 0.00 |
| ATOM | 1772 | HD12 | ILE | 111 | 17.944 | 14.921 | -5.927  | 1.00 | 0.00 |
| ATOM | 1773 | HD13 | ILE | 111 | 17.968 | 13.154 | -6.135  | 1.00 | 0.00 |
| ATOM | 1774 | C    | ILE | 111 | 15.662 | 11.962 | -10.534 | 1.00 | 0.00 |
| ATOM | 1775 | O    | ILE | 111 | 15.270 | 12.162 | -11.685 | 1.00 | 0.00 |

|      |      |     |     |     |        |        |         |      |      |
|------|------|-----|-----|-----|--------|--------|---------|------|------|
| ATOM | 1776 | N   | ALA | 112 | 16.137 | 10.789 | -10.120 | 1.00 | 0.00 |
| ATOM | 1777 | H   | ALA | 112 | 16.438 | 10.677 | -9.162  | 1.00 | 0.00 |
| ATOM | 1778 | CA  | ALA | 112 | 16.228 | 9.645  | -11.008 | 1.00 | 0.00 |
| ATOM | 1779 | HA  | ALA | 112 | 16.717 | 9.891  | -11.950 | 1.00 | 0.00 |
| ATOM | 1780 | CB  | ALA | 112 | 17.005 | 8.517  | -10.336 | 1.00 | 0.00 |
| ATOM | 1781 | HB1 | ALA | 112 | 16.522 | 8.253  | -9.395  | 1.00 | 0.00 |
| ATOM | 1782 | HB2 | ALA | 112 | 17.023 | 7.646  | -10.991 | 1.00 | 0.00 |
| ATOM | 1783 | HB3 | ALA | 112 | 18.026 | 8.844  | -10.140 | 1.00 | 0.00 |
| ATOM | 1784 | C   | ALA | 112 | 14.837 | 9.169  | -11.317 | 1.00 | 0.00 |
| ATOM | 1785 | O   | ALA | 112 | 13.861 | 9.847  | -10.991 | 1.00 | 0.00 |
| ATOM | 1786 | N   | GLY | 113 | 14.723 | 7.985  | -11.890 | 1.00 | 0.00 |
| ATOM | 1787 | H   | GLY | 113 | 15.512 | 7.416  | -12.163 | 1.00 | 0.00 |
| ATOM | 1788 | CA  | GLY | 113 | 13.404 | 7.481  | -12.136 | 1.00 | 0.00 |
| ATOM | 1789 | HA2 | GLY | 113 | 12.750 | 8.266  | -12.513 | 1.00 | 0.00 |
| ATOM | 1790 | HA3 | GLY | 113 | 13.428 | 6.655  | -12.847 | 1.00 | 0.00 |
| ATOM | 1791 | C   | GLY | 113 | 12.859 | 6.978  | -10.815 | 1.00 | 0.00 |
| ATOM | 1792 | O   | GLY | 113 | 13.148 | 5.859  | -10.389 | 1.00 | 0.00 |
| ATOM | 1793 | N   | PHE | 114 | 12.099 | 7.845  | -10.163 | 1.00 | 0.00 |
| ATOM | 1794 | H   | PHE | 114 | 11.924 | 8.754  | -10.566 | 1.00 | 0.00 |
| ATOM | 1795 | CA  | PHE | 114 | 11.522 | 7.545  | -8.857  | 1.00 | 0.00 |
| ATOM | 1796 | HA  | PHE | 114 | 12.269 | 7.683  | -8.075  | 1.00 | 0.00 |
| ATOM | 1797 | CB  | PHE | 114 | 10.347 | 8.486  | -8.582  | 1.00 | 0.00 |

|      |      |         |     |        |         |        |      |      |
|------|------|---------|-----|--------|---------|--------|------|------|
| ATOM | 1798 | HB2 PHE | 114 | 10.635 | 9.535   | -8.652 | 1.00 | 0.00 |
| ATOM | 1799 | HB3 PHE | 114 | 9.506  | 8.295   | -9.248 | 1.00 | 0.00 |
| ATOM | 1800 | CG PHE  | 114 | 9.841  | 8.270   | -7.173 | 1.00 | 0.00 |
| ATOM | 1801 | CD1 PHE | 114 | 10.449 | 8.938   | -6.102 | 1.00 | 0.00 |
| ATOM | 1802 | HD1 PHE | 114 | 11.287 | 9.611   | -6.283 | 1.00 | 0.00 |
| ATOM | 1803 | CE1 PHE | 114 | 9.980  | 8.740   | -4.798 | 1.00 | 0.00 |
| ATOM | 1804 | HE1 PHE | 114 | 10.453 | 9.260   | -3.965 | 1.00 | 0.00 |
| ATOM | 1805 | CZ PHE  | 114 | 8.906  | 7.875   | -4.563 | 1.00 | 0.00 |
| ATOM | 1806 | HZ PHE  | 114 | 8.543  | 7.721   | -3.547 | 1.00 | 0.00 |
| ATOM | 1807 | CE2 PHE | 114 | 8.298  | 7.207   | -5.633 | 1.00 | 0.00 |
| ATOM | 1808 | HE2 PHE | 114 | 7.462  | 6.533   | -5.450 | 1.00 | 0.00 |
| ATOM | 1809 | CD2 PHE | 114 | 8.765  | 7.405   | -6.938 | 1.00 | 0.00 |
| ATOM | 1810 | HD2 PHE | 114 | 8.291  | 6.886   | -7.771 | 1.00 | 0.00 |
| ATOM | 1811 | C PHE   | 114 | 11.042 | 6.094   | -8.784 | 1.00 | 0.00 |
| ATOM | 1812 | O PHE   | 114 | 11.443 | 5.405   | -7.861 | 1.00 | 0.00 |
| ATOM | 1813 | OXT PHE | 114 | 10.280 | 5.696   | -9.651 | 1.00 | 0.00 |
| TER  |      |         |     |        |         |        |      |      |
| ATOM | 1814 | S1 LIG  | 115 | 20.186 | -17.648 | -7.229 | 1.00 | 0.00 |
| ATOM | 1815 | S2 LIG  | 115 | 17.500 | -22.374 | -1.683 | 1.00 | 0.00 |
| ATOM | 1816 | O1 LIG  | 115 | 14.611 | -18.284 | -3.197 | 1.00 | 0.00 |
| ATOM | 1817 | H5 LIG  | 115 | 14.071 | -18.772 | -2.539 | 1.00 | 0.00 |
| ATOM | 1818 | O2 LIG  | 115 | 20.828 | -16.228 | -6.847 | 1.00 | 0.00 |

|      |      |    |     |     |        |         |         |      |      |
|------|------|----|-----|-----|--------|---------|---------|------|------|
| ATOM | 1819 | H6 | LIG | 115 | 20.063 | -15.587 | -6.964  | 1.00 | 0.00 |
| ATOM | 1820 | O3 | LIG | 115 | 16.328 | -23.416 | -2.033  | 1.00 | 0.00 |
| ATOM | 1821 | H7 | LIG | 115 | 15.493 | -22.948 | -1.741  | 1.00 | 0.00 |
| ATOM | 1822 | O4 | LIG | 115 | 21.197 | -18.650 | -6.962  | 1.00 | 0.00 |
| ATOM | 1823 | O5 | LIG | 115 | 19.536 | -17.567 | -8.529  | 1.00 | 0.00 |
| ATOM | 1824 | O6 | LIG | 115 | 18.733 | -22.944 | -2.184  | 1.00 | 0.00 |
| ATOM | 1825 | O7 | LIG | 115 | 17.376 | -21.942 | -0.299  | 1.00 | 0.00 |
| ATOM | 1826 | O8 | LIG | 115 | 15.898 | -10.411 | -10.471 | 1.00 | 0.00 |
| ATOM | 1827 | O9 | LIG | 115 | 17.965 | -9.758  | -10.344 | 1.00 | 0.00 |
| ATOM | 1828 | N1 | LIG | 115 | 15.624 | -16.486 | -4.865  | 1.00 | 0.00 |
| ATOM | 1829 | H3 | LIG | 115 | 14.830 | -16.736 | -4.298  | 1.00 | 0.00 |
| ATOM | 1830 | H4 | LIG | 115 | 15.616 | -15.663 | -5.447  | 1.00 | 0.00 |
| ATOM | 1831 | N2 | LIG | 115 | 17.480 | -15.784 | -6.548  | 1.00 | 0.00 |
| ATOM | 1832 | N3 | LIG | 115 | 14.734 | -20.426 | -1.828  | 1.00 | 0.00 |
| ATOM | 1833 | N4 | LIG | 115 | 18.410 | -15.145 | -7.122  | 1.00 | 0.00 |
| ATOM | 1834 | N5 | LIG | 115 | 14.510 | -21.563 | -1.331  | 1.00 | 0.00 |
| ATOM | 1835 | N6 | LIG | 115 | 17.061 | -10.549 | -10.110 | 1.00 | 0.00 |
| ATOM | 1836 | C1 | LIG | 115 | 16.761 | -18.539 | -4.217  | 1.00 | 0.00 |
| ATOM | 1837 | C2 | LIG | 115 | 17.927 | -19.348 | -4.344  | 1.00 | 0.00 |
| ATOM | 1838 | C3 | LIG | 115 | 16.671 | -17.320 | -4.987  | 1.00 | 0.00 |
| ATOM | 1839 | C4 | LIG | 115 | 18.870 | -17.831 | -5.984  | 1.00 | 0.00 |
| ATOM | 1840 | C5 | LIG | 115 | 18.958 | -18.975 | -5.241  | 1.00 | 0.00 |



|      |      |     |     |     |        |         |        |      |      |
|------|------|-----|-----|-----|--------|---------|--------|------|------|
| ATOM | 1841 | H1  | LIG | 115 | 19.820 | -19.619 | -5.357 | 1.00 | 0.00 |
| ATOM | 1842 | C6  | LIG | 115 | 15.748 | -18.996 | -3.335 | 1.00 | 0.00 |
| ATOM | 1843 | C7  | LIG | 115 | 17.075 | -20.950 | -2.726 | 1.00 | 0.00 |
| ATOM | 1844 | C8  | LIG | 115 | 18.062 | -20.530 | -3.577 | 1.00 | 0.00 |
| ATOM | 1845 | H2  | LIG | 115 | 18.972 | -21.111 | -3.656 | 1.00 | 0.00 |
| ATOM | 1846 | C9  | LIG | 115 | 17.738 | -16.958 | -5.876 | 1.00 | 0.00 |
| ATOM | 1847 | C10 | LIG | 115 | 15.868 | -20.198 | -2.598 | 1.00 | 0.00 |
| ATOM | 1848 | C11 | LIG | 115 | 18.011 | -14.016 | -7.863 | 1.00 | 0.00 |
| ATOM | 1849 | C12 | LIG | 115 | 13.369 | -21.687 | -0.517 | 1.00 | 0.00 |
| ATOM | 1850 | C13 | LIG | 115 | 16.695 | -13.811 | -8.313 | 1.00 | 0.00 |
| ATOM | 1851 | H8  | LIG | 115 | 15.938 | -14.555 | -8.106 | 1.00 | 0.00 |
| ATOM | 1852 | C14 | LIG | 115 | 19.015 | -13.092 | -8.184 | 1.00 | 0.00 |
| ATOM | 1853 | H9  | LIG | 115 | 20.031 | -13.272 | -7.855 | 1.00 | 0.00 |
| ATOM | 1854 | C15 | LIG | 115 | 16.385 | -12.677 | -9.046 | 1.00 | 0.00 |
| ATOM | 1855 | H10 | LIG | 115 | 15.385 | -12.498 | -9.413 | 1.00 | 0.00 |
| ATOM | 1856 | C16 | LIG | 115 | 18.708 | -11.952 | -8.912 | 1.00 | 0.00 |
| ATOM | 1857 | H11 | LIG | 115 | 19.464 | -11.221 | -9.162 | 1.00 | 0.00 |
| ATOM | 1858 | C17 | LIG | 115 | 17.395 | -11.758 | -9.328 | 1.00 | 0.00 |
| ATOM | 1859 | C18 | LIG | 115 | 12.665 | -20.597 | 0.021  | 1.00 | 0.00 |
| ATOM | 1860 | H12 | LIG | 115 | 13.013 | -19.589 | -0.162 | 1.00 | 0.00 |
| ATOM | 1861 | C19 | LIG | 115 | 12.961 | -22.997 | -0.226 | 1.00 | 0.00 |
| ATOM | 1862 | H13 | LIG | 115 | 13.527 | -23.830 | -0.625 | 1.00 | 0.00 |

|      |      |     |     |     |         |         |        |      |      |
|------|------|-----|-----|-----|---------|---------|--------|------|------|
| ATOM | 1863 | C20 | LIG | 115 | 11.550  | -20.826 | 0.813  | 1.00 | 0.00 |
| ATOM | 1864 | H14 | LIG | 115 | 11.011  | -19.987 | 1.238  | 1.00 | 0.00 |
| ATOM | 1865 | C21 | LIG | 115 | 11.836  | -23.216 | 0.560  | 1.00 | 0.00 |
| ATOM | 1866 | H15 | LIG | 115 | 11.519  | -24.229 | 0.775  | 1.00 | 0.00 |
| ATOM | 1867 | C22 | LIG | 115 | 11.128  | -22.133 | 1.079  | 1.00 | 0.00 |
| ATOM | 1868 | H16 | LIG | 115 | 10.258  | -22.303 | 1.702  | 1.00 | 0.00 |
| TER  |      |     |     |     |         |         |        |      |      |
| ATOM | 1869 | S1  | LIG | 116 | -18.229 | 18.521  | 5.449  | 1.00 | 0.00 |
| ATOM | 1870 | S2  | LIG | 116 | -20.882 | 25.742  | 6.508  | 1.00 | 0.00 |
| ATOM | 1871 | O1  | LIG | 116 | -23.239 | 22.622  | 3.034  | 1.00 | 0.00 |
| ATOM | 1872 | H5  | LIG | 116 | -23.757 | 23.454  | 3.050  | 1.00 | 0.00 |
| ATOM | 1873 | O2  | LIG | 116 | -17.318 | 18.168  | 4.176  | 1.00 | 0.00 |
| ATOM | 1874 | H6  | LIG | 116 | -17.976 | 17.798  | 3.513  | 1.00 | 0.00 |
| ATOM | 1875 | O3  | LIG | 116 | -22.245 | 25.971  | 7.327  | 1.00 | 0.00 |
| ATOM | 1876 | H7  | LIG | 116 | -22.945 | 26.046  | 6.616  | 1.00 | 0.00 |
| ATOM | 1877 | O4  | LIG | 116 | -17.369 | 19.180  | 6.410  | 1.00 | 0.00 |
| ATOM | 1878 | O5  | LIG | 116 | -19.027 | 17.363  | 5.827  | 1.00 | 0.00 |
| ATOM | 1879 | O6  | LIG | 116 | -19.838 | 25.513  | 7.485  | 1.00 | 0.00 |
| ATOM | 1880 | O7  | LIG | 116 | -20.746 | 26.768  | 5.485  | 1.00 | 0.00 |
| ATOM | 1881 | O8  | LIG | 116 | -21.670 | 12.466  | -0.276 | 1.00 | 0.00 |
| ATOM | 1882 | O9  | LIG | 116 | -19.526 | 12.183  | -0.471 | 1.00 | 0.00 |
| ATOM | 1883 | N1  | LIG | 116 | -22.178 | 20.265  | 2.430  | 1.00 | 0.00 |

|      |      |     |     |     |         |        |        |      |      |
|------|------|-----|-----|-----|---------|--------|--------|------|------|
| ATOM | 1884 | H3  | LIG | 116 | -22.920 | 20.917 | 2.228  | 1.00 | 0.00 |
| ATOM | 1885 | H4  | LIG | 116 | -22.130 | 19.367 | 1.974  | 1.00 | 0.00 |
| ATOM | 1886 | N2  | LIG | 116 | -20.476 | 18.370 | 2.961  | 1.00 | 0.00 |
| ATOM | 1887 | N3  | LIG | 116 | -23.285 | 24.825 | 4.306  | 1.00 | 0.00 |
| ATOM | 1888 | N4  | LIG | 116 | -19.540 | 17.525 | 2.857  | 1.00 | 0.00 |
| ATOM | 1889 | N5  | LIG | 116 | -23.623 | 25.805 | 5.025  | 1.00 | 0.00 |
| ATOM | 1890 | N6  | LIG | 116 | -20.507 | 12.799 | -0.077 | 1.00 | 0.00 |
| ATOM | 1891 | C1  | LIG | 116 | -21.317 | 21.746 | 4.160  | 1.00 | 0.00 |
| ATOM | 1892 | C2  | LIG | 116 | -20.327 | 21.961 | 5.161  | 1.00 | 0.00 |
| ATOM | 1893 | C3  | LIG | 116 | -21.308 | 20.501 | 3.427  | 1.00 | 0.00 |
| ATOM | 1894 | C4  | LIG | 116 | -19.378 | 19.763 | 4.776  | 1.00 | 0.00 |
| ATOM | 1895 | C5  | LIG | 116 | -19.379 | 20.949 | 5.454  | 1.00 | 0.00 |
| ATOM | 1896 | H1  | LIG | 116 | -18.658 | 21.110 | 6.245  | 1.00 | 0.00 |
| ATOM | 1897 | C6  | LIG | 116 | -22.262 | 22.783 | 3.951  | 1.00 | 0.00 |
| ATOM | 1898 | C7  | LIG | 116 | -21.204 | 24.175 | 5.651  | 1.00 | 0.00 |
| ATOM | 1899 | C8  | LIG | 116 | -20.285 | 23.185 | 5.873  | 1.00 | 0.00 |
| ATOM | 1900 | H2  | LIG | 116 | -19.502 | 23.346 | 6.602  | 1.00 | 0.00 |
| ATOM | 1901 | C9  | LIG | 116 | -20.326 | 19.501 | 3.734  | 1.00 | 0.00 |
| ATOM | 1902 | C10 | LIG | 116 | -22.244 | 23.990 | 4.689  | 1.00 | 0.00 |
| ATOM | 1903 | C11 | LIG | 116 | -19.846 | 16.361 | 2.125  | 1.00 | 0.00 |
| ATOM | 1904 | C12 | LIG | 116 | -24.649 | 26.632 | 4.529  | 1.00 | 0.00 |
| ATOM | 1905 | C13 | LIG | 116 | -21.158 | 15.924 | 1.876  | 1.00 | 0.00 |

|      |      |     |     |     |         |        |        |      |      |
|------|------|-----|-----|-----|---------|--------|--------|------|------|
| ATOM | 1906 | H8  | LIG | 116 | -21.992 | 16.487 | 2.272  | 1.00 | 0.00 |
| ATOM | 1907 | C14 | LIG | 116 | -18.756 | 15.602 | 1.675  | 1.00 | 0.00 |
| ATOM | 1908 | H9  | LIG | 116 | -17.748 | 15.933 | 1.894  | 1.00 | 0.00 |
| ATOM | 1909 | C15 | LIG | 116 | -21.374 | 14.761 | 1.155  | 1.00 | 0.00 |
| ATOM | 1910 | H10 | LIG | 116 | -22.372 | 14.397 | 0.956  | 1.00 | 0.00 |
| ATOM | 1911 | C16 | LIG | 116 | -18.966 | 14.440 | 0.947  | 1.00 | 0.00 |
| ATOM | 1912 | H11 | LIG | 116 | -18.142 | 13.845 | 0.581  | 1.00 | 0.00 |
| ATOM | 1913 | C17 | LIG | 116 | -20.275 | 14.039 | 0.693  | 1.00 | 0.00 |
| ATOM | 1914 | C18 | LIG | 116 | -25.086 | 26.629 | 3.194  | 1.00 | 0.00 |
| ATOM | 1915 | H12 | LIG | 116 | -24.605 | 25.981 | 2.473  | 1.00 | 0.00 |
| ATOM | 1916 | C19 | LIG | 116 | -25.223 | 27.517 | 5.453  | 1.00 | 0.00 |
| ATOM | 1917 | H13 | LIG | 116 | -24.860 | 27.529 | 6.474  | 1.00 | 0.00 |
| ATOM | 1918 | C20 | LIG | 116 | -26.106 | 27.483 | 2.806  | 1.00 | 0.00 |
| ATOM | 1919 | H14 | LIG | 116 | -26.439 | 27.491 | 1.775  | 1.00 | 0.00 |
| ATOM | 1920 | C21 | LIG | 116 | -26.252 | 28.363 | 5.057  | 1.00 | 0.00 |
| ATOM | 1921 | H15 | LIG | 116 | -26.700 | 29.039 | 5.774  | 1.00 | 0.00 |
| ATOM | 1922 | C22 | LIG | 116 | -26.697 | 28.346 | 3.735  | 1.00 | 0.00 |
| ATOM | 1923 | H16 | LIG | 116 | -27.491 | 29.014 | 3.422  | 1.00 | 0.00 |
| TER  |      |     |     |     |         |        |        |      |      |
| ATOM | 1924 | S1  | LIG | 117 | 16.222  | -4.253 | 18.092 | 1.00 | 0.00 |
| ATOM | 1925 | S2  | LIG | 117 | 23.654  | -2.819 | 16.356 | 1.00 | 0.00 |
| ATOM | 1926 | O1  | LIG | 117 | 22.415  | -7.199 | 18.932 | 1.00 | 0.00 |

|      |      |    |     |     |        |         |        |      |      |
|------|------|----|-----|-----|--------|---------|--------|------|------|
| ATOM | 1927 | H5 | LIG | 117 | 23.382 | -7.242  | 18.769 | 1.00 | 0.00 |
| ATOM | 1928 | O2 | LIG | 117 | 15.669 | -3.995  | 19.576 | 1.00 | 0.00 |
| ATOM | 1929 | H6 | LIG | 117 | 15.725 | -4.900  | 20.007 | 1.00 | 0.00 |
| ATOM | 1930 | O3 | LIG | 117 | 24.360 | -3.638  | 15.167 | 1.00 | 0.00 |
| ATOM | 1931 | H7 | LIG | 117 | 24.835 | -4.383  | 15.636 | 1.00 | 0.00 |
| ATOM | 1932 | O4 | LIG | 117 | 16.291 | -2.962  | 17.439 | 1.00 | 0.00 |
| ATOM | 1933 | O5 | LIG | 117 | 15.507 | -5.365  | 17.480 | 1.00 | 0.00 |
| ATOM | 1934 | O6 | LIG | 117 | 22.853 | -1.784  | 15.736 | 1.00 | 0.00 |
| ATOM | 1935 | O7 | LIG | 117 | 24.634 | -2.499  | 17.382 | 1.00 | 0.00 |
| ATOM | 1936 | O8 | LIG | 117 | 13.175 | -11.527 | 22.461 | 1.00 | 0.00 |
| ATOM | 1937 | O9 | LIG | 117 | 11.988 | -9.908  | 23.287 | 1.00 | 0.00 |
| ATOM | 1938 | N1 | LIG | 117 | 19.937 | -7.573  | 19.803 | 1.00 | 0.00 |
| ATOM | 1939 | H3 | LIG | 117 | 20.872 | -7.947  | 19.780 | 1.00 | 0.00 |
| ATOM | 1940 | H4 | LIG | 117 | 19.181 | -8.076  | 20.244 | 1.00 | 0.00 |
| ATOM | 1941 | N2 | LIG | 117 | 17.427 | -6.885  | 19.789 | 1.00 | 0.00 |
| ATOM | 1942 | N3 | LIG | 117 | 24.214 | -5.863  | 17.726 | 1.00 | 0.00 |
| ATOM | 1943 | N4 | LIG | 117 | 16.273 | -6.522  | 20.161 | 1.00 | 0.00 |
| ATOM | 1944 | N5 | LIG | 117 | 25.137 | -5.496  | 16.948 | 1.00 | 0.00 |
| ATOM | 1945 | N6 | LIG | 117 | 12.920 | -10.339 | 22.622 | 1.00 | 0.00 |
| ATOM | 1946 | C1 | LIG | 117 | 20.629 | -5.688  | 18.426 | 1.00 | 0.00 |
| ATOM | 1947 | C2 | LIG | 117 | 20.242 | -4.485  | 17.770 | 1.00 | 0.00 |
| ATOM | 1948 | C3 | LIG | 117 | 19.622 | -6.462  | 19.115 | 1.00 | 0.00 |

|      |      |     |     |     |        |         |        |      |      |
|------|------|-----|-----|-----|--------|---------|--------|------|------|
| ATOM | 1949 | C4  | LIG | 117 | 17.925 | -4.820  | 18.401 | 1.00 | 0.00 |
| ATOM | 1950 | C5  | LIG | 117 | 18.883 | -4.082  | 17.765 | 1.00 | 0.00 |
| ATOM | 1951 | H1  | LIG | 117 | 18.597 | -3.187  | 17.228 | 1.00 | 0.00 |
| ATOM | 1952 | C6  | LIG | 117 | 21.998 | -6.055  | 18.352 | 1.00 | 0.00 |
| ATOM | 1953 | C7  | LIG | 117 | 22.527 | -4.055  | 17.062 | 1.00 | 0.00 |
| ATOM | 1954 | C8  | LIG | 117 | 21.210 | -3.685  | 17.116 | 1.00 | 0.00 |
| ATOM | 1955 | H2  | LIG | 117 | 20.904 | -2.754  | 16.657 | 1.00 | 0.00 |
| ATOM | 1956 | C9  | LIG | 117 | 18.257 | -6.021  | 19.108 | 1.00 | 0.00 |
| ATOM | 1957 | C10 | LIG | 117 | 22.958 | -5.275  | 17.665 | 1.00 | 0.00 |
| ATOM | 1958 | C11 | LIG | 117 | 15.479 | -7.521  | 20.756 | 1.00 | 0.00 |
| ATOM | 1959 | C12 | LIG | 117 | 26.394 | -6.105  | 17.121 | 1.00 | 0.00 |
| ATOM | 1960 | C13 | LIG | 117 | 15.716 | -8.897  | 20.596 | 1.00 | 0.00 |
| ATOM | 1961 | H8  | LIG | 117 | 16.535 | -9.228  | 19.972 | 1.00 | 0.00 |
| ATOM | 1962 | C14 | LIG | 117 | 14.378 | -7.080  | 21.504 | 1.00 | 0.00 |
| ATOM | 1963 | H9  | LIG | 117 | 14.189 | -6.019  | 21.601 | 1.00 | 0.00 |
| ATOM | 1964 | C15 | LIG | 117 | 14.881 | -9.817  | 21.207 | 1.00 | 0.00 |
| ATOM | 1965 | H10 | LIG | 117 | 15.034 | -10.881 | 21.094 | 1.00 | 0.00 |
| ATOM | 1966 | C16 | LIG | 117 | 13.543 | -7.998  | 22.124 | 1.00 | 0.00 |
| ATOM | 1967 | H11 | LIG | 117 | 12.695 | -7.682  | 22.715 | 1.00 | 0.00 |
| ATOM | 1968 | C17 | LIG | 117 | 13.810 | -9.355  | 21.970 | 1.00 | 0.00 |
| ATOM | 1969 | C18 | LIG | 117 | 26.764 | -6.834  | 18.264 | 1.00 | 0.00 |
| ATOM | 1970 | H12 | LIG | 117 | 26.071 | -6.927  | 19.090 | 1.00 | 0.00 |

|      |      |     |     |     |        |        |        |      |      |
|------|------|-----|-----|-----|--------|--------|--------|------|------|
| ATOM | 1971 | C19 | LIG | 117 | 27.312 | -5.925 | 16.077 | 1.00 | 0.00 |
| ATOM | 1972 | H13 | LIG | 117 | 27.025 | -5.339 | 15.212 | 1.00 | 0.00 |
| ATOM | 1973 | C20 | LIG | 117 | 28.029 | -7.397 | 18.336 | 1.00 | 0.00 |
| ATOM | 1974 | H14 | LIG | 117 | 28.322 | -7.951 | 19.220 | 1.00 | 0.00 |
| ATOM | 1975 | C21 | LIG | 117 | 28.574 | -6.502 | 16.154 | 1.00 | 0.00 |
| ATOM | 1976 | H15 | LIG | 117 | 29.278 | -6.368 | 15.342 | 1.00 | 0.00 |
| ATOM | 1977 | C22 | LIG | 117 | 28.934 | -7.240 | 17.281 | 1.00 | 0.00 |
| ATOM | 1978 | H16 | LIG | 117 | 29.923 | -7.680 | 17.348 | 1.00 | 0.00 |

TER

|      |      |    |     |     |         |        |         |      |      |
|------|------|----|-----|-----|---------|--------|---------|------|------|
| ATOM | 1979 | S1 | LIG | 118 | -23.141 | 15.892 | -20.995 | 1.00 | 0.00 |
| ATOM | 1980 | S2 | LIG | 118 | -19.790 | 22.757 | -19.596 | 1.00 | 0.00 |
| ATOM | 1981 | O1 | LIG | 118 | -23.512 | 22.411 | -23.255 | 1.00 | 0.00 |
| ATOM | 1982 | H5 | LIG | 118 | -23.268 | 23.359 | -23.202 | 1.00 | 0.00 |
| ATOM | 1983 | O2 | LIG | 118 | -22.711 | 15.022 | -22.273 | 1.00 | 0.00 |
| ATOM | 1984 | H6 | LIG | 118 | -23.401 | 15.262 | -22.962 | 1.00 | 0.00 |
| ATOM | 1985 | O3 | LIG | 118 | -20.602 | 23.880 | -18.782 | 1.00 | 0.00 |
| ATOM | 1986 | H7 | LIG | 118 | -20.996 | 24.459 | -19.497 | 1.00 | 0.00 |
| ATOM | 1987 | O4 | LIG | 118 | -22.116 | 15.696 | -19.990 | 1.00 | 0.00 |
| ATOM | 1988 | O5 | LIG | 118 | -24.545 | 15.663 | -20.686 | 1.00 | 0.00 |
| ATOM | 1989 | O6 | LIG | 118 | -19.282 | 21.815 | -18.620 | 1.00 | 0.00 |
| ATOM | 1990 | O7 | LIG | 118 | -18.907 | 23.391 | -20.562 | 1.00 | 0.00 |
| ATOM | 1991 | O8 | LIG | 118 | -29.630 | 14.373 | -27.066 | 1.00 | 0.00 |

|      |      |     |     |     |         |        |         |      |      |
|------|------|-----|-----|-----|---------|--------|---------|------|------|
| ATOM | 1992 | O9  | LIG | 118 | -28.349 | 12.629 | -27.249 | 1.00 | 0.00 |
| ATOM | 1993 | N1  | LIG | 118 | -24.460 | 20.037 | -23.967 | 1.00 | 0.00 |
| ATOM | 1994 | H3  | LIG | 118 | -24.490 | 21.028 | -24.144 | 1.00 | 0.00 |
| ATOM | 1995 | H4  | LIG | 118 | -25.055 | 19.395 | -24.468 | 1.00 | 0.00 |
| ATOM | 1996 | N2  | LIG | 118 | -24.683 | 17.484 | -23.514 | 1.00 | 0.00 |
| ATOM | 1997 | N3  | LIG | 118 | -22.008 | 23.926 | -21.871 | 1.00 | 0.00 |
| ATOM | 1998 | N4  | LIG | 118 | -24.646 | 16.226 | -23.650 | 1.00 | 0.00 |
| ATOM | 1999 | N5  | LIG | 118 | -21.565 | 24.827 | -21.107 | 1.00 | 0.00 |
| ATOM | 2000 | N6  | LIG | 118 | -28.597 | 13.753 | -26.836 | 1.00 | 0.00 |
| ATOM | 2001 | C1  | LIG | 118 | -22.874 | 20.385 | -22.152 | 1.00 | 0.00 |
| ATOM | 2002 | C2  | LIG | 118 | -22.083 | 19.788 | -21.129 | 1.00 | 0.00 |
| ATOM | 2003 | C3  | LIG | 118 | -23.736 | 19.541 | -22.948 | 1.00 | 0.00 |
| ATOM | 2004 | C4  | LIG | 118 | -23.002 | 17.598 | -21.616 | 1.00 | 0.00 |
| ATOM | 2005 | C5  | LIG | 118 | -22.175 | 18.397 | -20.877 | 1.00 | 0.00 |
| ATOM | 2006 | H1  | LIG | 118 | -21.599 | 17.963 | -20.070 | 1.00 | 0.00 |
| ATOM | 2007 | C6  | LIG | 118 | -22.765 | 21.789 | -22.319 | 1.00 | 0.00 |
| ATOM | 2008 | C7  | LIG | 118 | -21.107 | 21.935 | -20.537 | 1.00 | 0.00 |
| ATOM | 2009 | C8  | LIG | 118 | -21.201 | 20.581 | -20.355 | 1.00 | 0.00 |
| ATOM | 2010 | H2  | LIG | 118 | -20.578 | 20.105 | -19.609 | 1.00 | 0.00 |
| ATOM | 2011 | C9  | LIG | 118 | -23.797 | 18.133 | -22.682 | 1.00 | 0.00 |
| ATOM | 2012 | C10 | LIG | 118 | -21.913 | 22.586 | -21.519 | 1.00 | 0.00 |
| ATOM | 2013 | C11 | LIG | 118 | -25.665 | 15.666 | -24.445 | 1.00 | 0.00 |



|      |      |     |     |     |         |        |         |      |      |
|------|------|-----|-----|-----|---------|--------|---------|------|------|
| ATOM | 2014 | C12 | LIG | 118 | -21.650 | 26.153 | -21.571 | 1.00 | 0.00 |
| ATOM | 2015 | C13 | LIG | 118 | -26.873 | 16.324 | -24.732 | 1.00 | 0.00 |
| ATOM | 2016 | H8  | LIG | 118 | -27.058 | 17.305 | -24.317 | 1.00 | 0.00 |
| ATOM | 2017 | C14 | LIG | 118 | -25.443 | 14.366 | -24.920 | 1.00 | 0.00 |
| ATOM | 2018 | H9  | LIG | 118 | -24.520 | 13.857 | -24.672 | 1.00 | 0.00 |
| ATOM | 2019 | C15 | LIG | 118 | -27.830 | 15.699 | -25.515 | 1.00 | 0.00 |
| ATOM | 2020 | H10 | LIG | 118 | -28.772 | 16.177 | -25.744 | 1.00 | 0.00 |
| ATOM | 2021 | C16 | LIG | 118 | -26.396 | 13.738 | -25.710 | 1.00 | 0.00 |
| ATOM | 2022 | H11 | LIG | 118 | -26.242 | 12.741 | -26.096 | 1.00 | 0.00 |
| ATOM | 2023 | C17 | LIG | 118 | -27.575 | 14.418 | -26.000 | 1.00 | 0.00 |
| ATOM | 2024 | C18 | LIG | 118 | -21.892 | 26.503 | -22.910 | 1.00 | 0.00 |
| ATOM | 2025 | H12 | LIG | 118 | -21.996 | 25.728 | -23.658 | 1.00 | 0.00 |
| ATOM | 2026 | C19 | LIG | 118 | -21.447 | 27.154 | -20.610 | 1.00 | 0.00 |
| ATOM | 2027 | H13 | LIG | 118 | -21.235 | 26.872 | -19.586 | 1.00 | 0.00 |
| ATOM | 2028 | C20 | LIG | 118 | -21.958 | 27.842 | -23.266 | 1.00 | 0.00 |
| ATOM | 2029 | H14 | LIG | 118 | -22.134 | 28.116 | -24.299 | 1.00 | 0.00 |
| ATOM | 2030 | C21 | LIG | 118 | -21.526 | 28.493 | -20.975 | 1.00 | 0.00 |
| ATOM | 2031 | H15 | LIG | 118 | -21.377 | 29.263 | -20.228 | 1.00 | 0.00 |
| ATOM | 2032 | C22 | LIG | 118 | -21.783 | 28.839 | -22.301 | 1.00 | 0.00 |
| ATOM | 2033 | H16 | LIG | 118 | -21.832 | 29.883 | -22.588 | 1.00 | 0.00 |
| TER  |      |     |     |     |         |        |         |      |      |
| ATOM | 2034 | S1  | LIG | 119 | -11.262 | 21.248 | 15.337  | 1.00 | 0.00 |

|      |      |    |     |     |         |        |        |      |      |
|------|------|----|-----|-----|---------|--------|--------|------|------|
| ATOM | 2035 | S2 | LIG | 119 | -3.905  | 23.609 | 14.558 | 1.00 | 0.00 |
| ATOM | 2036 | O1 | LIG | 119 | -5.140  | 20.266 | 18.386 | 1.00 | 0.00 |
| ATOM | 2037 | H5 | LIG | 119 | -4.168  | 20.388 | 18.433 | 1.00 | 0.00 |
| ATOM | 2038 | O2 | LIG | 119 | -12.205 | 21.883 | 16.470 | 1.00 | 0.00 |
| ATOM | 2039 | H6 | LIG | 119 | -12.135 | 21.227 | 17.227 | 1.00 | 0.00 |
| ATOM | 2040 | O3 | LIG | 119 | -2.814  | 22.604 | 13.941 | 1.00 | 0.00 |
| ATOM | 2041 | H7 | LIG | 119 | -2.375  | 22.200 | 14.745 | 1.00 | 0.00 |
| ATOM | 2042 | O4 | LIG | 119 | -11.209 | 22.204 | 14.251 | 1.00 | 0.00 |
| ATOM | 2043 | O5 | LIG | 119 | -11.637 | 19.862 | 15.097 | 1.00 | 0.00 |
| ATOM | 2044 | O6 | LIG | 119 | -4.658  | 24.148 | 13.444 | 1.00 | 0.00 |
| ATOM | 2045 | O7 | LIG | 119 | -3.272  | 24.484 | 15.533 | 1.00 | 0.00 |
| ATOM | 2046 | O8 | LIG | 119 | -14.283 | 15.507 | 21.597 | 1.00 | 0.00 |
| ATOM | 2047 | O9 | LIG | 119 | -15.854 | 17.001 | 21.483 | 1.00 | 0.00 |
| ATOM | 2048 | N1 | LIG | 119 | -7.682  | 19.677 | 18.868 | 1.00 | 0.00 |
| ATOM | 2049 | H3 | LIG | 119 | -6.729  | 19.541 | 19.165 | 1.00 | 0.00 |
| ATOM | 2050 | H4 | LIG | 119 | -8.448  | 19.207 | 19.326 | 1.00 | 0.00 |
| ATOM | 2051 | N2 | LIG | 119 | -10.176 | 19.731 | 18.126 | 1.00 | 0.00 |
| ATOM | 2052 | N3 | LIG | 119 | -3.296  | 21.457 | 17.099 | 1.00 | 0.00 |
| ATOM | 2053 | N4 | LIG | 119 | -11.425 | 19.933 | 18.107 | 1.00 | 0.00 |
| ATOM | 2054 | N5 | LIG | 119 | -2.266  | 21.723 | 16.421 | 1.00 | 0.00 |
| ATOM | 2055 | N6 | LIG | 119 | -14.733 | 16.585 | 21.226 | 1.00 | 0.00 |
| ATOM | 2056 | C1 | LIG | 119 | -6.930  | 21.056 | 17.008 | 1.00 | 0.00 |

|      |      |     |     |     |         |        |        |      |      |
|------|------|-----|-----|-----|---------|--------|--------|------|------|
| ATOM | 2057 | C2  | LIG | 119 | -7.300  | 21.829 | 15.870 | 1.00 | 0.00 |
| ATOM | 2058 | C3  | LIG | 119 | -7.962  | 20.371 | 17.752 | 1.00 | 0.00 |
| ATOM | 2059 | C4  | LIG | 119 | -9.633  | 21.227 | 16.149 | 1.00 | 0.00 |
| ATOM | 2060 | C5  | LIG | 119 | -8.655  | 21.887 | 15.459 | 1.00 | 0.00 |
| ATOM | 2061 | H1  | LIG | 119 | -8.917  | 22.445 | 14.569 | 1.00 | 0.00 |
| ATOM | 2062 | C6  | LIG | 119 | -5.550  | 21.005 | 17.335 | 1.00 | 0.00 |
| ATOM | 2063 | C7  | LIG | 119 | -4.992  | 22.483 | 15.478 | 1.00 | 0.00 |
| ATOM | 2064 | C8  | LIG | 119 | -6.318  | 22.541 | 15.140 | 1.00 | 0.00 |
| ATOM | 2065 | H2  | LIG | 119 | -6.622  | 23.155 | 14.303 | 1.00 | 0.00 |
| ATOM | 2066 | C9  | LIG | 119 | -9.328  | 20.461 | 17.322 | 1.00 | 0.00 |
| ATOM | 2067 | C10 | LIG | 119 | -4.565  | 21.686 | 16.582 | 1.00 | 0.00 |
| ATOM | 2068 | C11 | LIG | 119 | -12.199 | 19.058 | 18.894 | 1.00 | 0.00 |
| ATOM | 2069 | C12 | LIG | 119 | -1.023  | 21.514 | 17.047 | 1.00 | 0.00 |
| ATOM | 2070 | C13 | LIG | 119 | -11.741 | 17.806 | 19.338 | 1.00 | 0.00 |
| ATOM | 2071 | H8  | LIG | 119 | -10.752 | 17.469 | 19.057 | 1.00 | 0.00 |
| ATOM | 2072 | C14 | LIG | 119 | -13.503 | 19.475 | 19.193 | 1.00 | 0.00 |
| ATOM | 2073 | H9  | LIG | 119 | -13.856 | 20.430 | 18.825 | 1.00 | 0.00 |
| ATOM | 2074 | C15 | LIG | 119 | -12.568 | 16.999 | 20.101 | 1.00 | 0.00 |
| ATOM | 2075 | H10 | LIG | 119 | -12.246 | 16.027 | 20.449 | 1.00 | 0.00 |
| ATOM | 2076 | C16 | LIG | 119 | -14.334 | 18.673 | 19.963 | 1.00 | 0.00 |
| ATOM | 2077 | H11 | LIG | 119 | -15.340 | 18.979 | 20.215 | 1.00 | 0.00 |
| ATOM | 2078 | C17 | LIG | 119 | -13.851 | 17.447 | 20.411 | 1.00 | 0.00 |

|      |      |     |     |     |        |        |        |      |      |
|------|------|-----|-----|-----|--------|--------|--------|------|------|
| ATOM | 2079 | C18 | LIG | 119 | -0.858 | 21.341 | 18.431 | 1.00 | 0.00 |
| ATOM | 2080 | H12 | LIG | 119 | -1.718 | 21.393 | 19.085 | 1.00 | 0.00 |
| ATOM | 2081 | C19 | LIG | 119 | 0.097  | 21.515 | 16.202 | 1.00 | 0.00 |
| ATOM | 2082 | H13 | LIG | 119 | -0.039 | 21.676 | 15.140 | 1.00 | 0.00 |
| ATOM | 2083 | C20 | LIG | 119 | 0.412  | 21.140 | 18.949 | 1.00 | 0.00 |
| ATOM | 2084 | H14 | LIG | 119 | 0.544  | 21.016 | 20.018 | 1.00 | 0.00 |
| ATOM | 2085 | C21 | LIG | 119 | 1.365  | 21.303 | 16.730 | 1.00 | 0.00 |
| ATOM | 2086 | H15 | LIG | 119 | 2.227  | 21.295 | 16.074 | 1.00 | 0.00 |
| ATOM | 2087 | C22 | LIG | 119 | 1.526  | 21.113 | 18.102 | 1.00 | 0.00 |
| ATOM | 2088 | H16 | LIG | 119 | 2.515  | 20.960 | 18.516 | 1.00 | 0.00 |

TER

|      |      |    |     |     |        |         |         |      |      |
|------|------|----|-----|-----|--------|---------|---------|------|------|
| ATOM | 2089 | S1 | LIG | 120 | 8.140  | -24.573 | -19.691 | 1.00 | 0.00 |
| ATOM | 2090 | S2 | LIG | 120 | 8.784  | -18.132 | -15.400 | 1.00 | 0.00 |
| ATOM | 2091 | O1 | LIG | 120 | 11.657 | -18.625 | -19.743 | 1.00 | 0.00 |
| ATOM | 2092 | H5 | LIG | 120 | 11.847 | -17.730 | -19.389 | 1.00 | 0.00 |
| ATOM | 2093 | O2 | LIG | 120 | 9.253  | -25.725 | -19.601 | 1.00 | 0.00 |
| ATOM | 2094 | H6 | LIG | 120 | 9.862  | -25.523 | -20.375 | 1.00 | 0.00 |
| ATOM | 2095 | O3 | LIG | 120 | 8.113  | -16.767 | -15.919 | 1.00 | 0.00 |
| ATOM | 2096 | H7 | LIG | 120 | 8.864  | -16.285 | -16.371 | 1.00 | 0.00 |
| ATOM | 2097 | O4 | LIG | 120 | 7.290  | -24.720 | -18.528 | 1.00 | 0.00 |
| ATOM | 2098 | O5 | LIG | 120 | 7.574  | -24.531 | -21.032 | 1.00 | 0.00 |
| ATOM | 2099 | O6 | LIG | 120 | 7.720  | -18.933 | -14.830 | 1.00 | 0.00 |

|      |      |    |     |     |        |         |         |      |      |
|------|------|----|-----|-----|--------|---------|---------|------|------|
| ATOM | 2100 | O7 | LIG | 120 | 9.989  | -17.831 | -14.644 | 1.00 | 0.00 |
| ATOM | 2101 | O8 | LIG | 120 | 12.656 | -26.263 | -27.308 | 1.00 | 0.00 |
| ATOM | 2102 | O9 | LIG | 120 | 12.660 | -28.177 | -26.285 | 1.00 | 0.00 |
| ATOM | 2103 | N1 | LIG | 120 | 11.687 | -20.927 | -21.063 | 1.00 | 0.00 |
| ATOM | 2104 | H3 | LIG | 120 | 12.066 | -19.995 | -21.014 | 1.00 | 0.00 |
| ATOM | 2105 | H4 | LIG | 120 | 11.940 | -21.559 | -21.807 | 1.00 | 0.00 |
| ATOM | 2106 | N2 | LIG | 120 | 10.669 | -23.285 | -21.482 | 1.00 | 0.00 |
| ATOM | 2107 | N3 | LIG | 120 | 10.882 | -17.109 | -17.852 | 1.00 | 0.00 |
| ATOM | 2108 | N4 | LIG | 120 | 10.537 | -24.537 | -21.610 | 1.00 | 0.00 |
| ATOM | 2109 | N5 | LIG | 120 | 10.407 | -16.153 | -17.180 | 1.00 | 0.00 |
| ATOM | 2110 | N6 | LIG | 120 | 12.463 | -26.970 | -26.327 | 1.00 | 0.00 |
| ATOM | 2111 | C1 | LIG | 120 | 10.260 | -20.474 | -19.143 | 1.00 | 0.00 |
| ATOM | 2112 | C2 | LIG | 120 | 9.269  | -20.972 | -18.250 | 1.00 | 0.00 |
| ATOM | 2113 | C3 | LIG | 120 | 10.712 | -21.319 | -20.224 | 1.00 | 0.00 |
| ATOM | 2114 | C4 | LIG | 120 | 9.126  | -23.057 | -19.480 | 1.00 | 0.00 |
| ATOM | 2115 | C5 | LIG | 120 | 8.714  | -22.261 | -18.448 | 1.00 | 0.00 |
| ATOM | 2116 | H1 | LIG | 120 | 7.933  | -22.611 | -17.786 | 1.00 | 0.00 |
| ATOM | 2117 | C6 | LIG | 120 | 10.738 | -19.158 | -18.912 | 1.00 | 0.00 |
| ATOM | 2118 | C7 | LIG | 120 | 9.310  | -18.918 | -16.950 | 1.00 | 0.00 |
| ATOM | 2119 | C8 | LIG | 120 | 8.829  | -20.183 | -17.159 | 1.00 | 0.00 |
| ATOM | 2120 | H2 | LIG | 120 | 8.105  | -20.593 | -16.467 | 1.00 | 0.00 |
| ATOM | 2121 | C9 | LIG | 120 | 10.144 | -22.626 | -20.392 | 1.00 | 0.00 |

|      |      |     |     |     |        |         |         |      |      |
|------|------|-----|-----|-----|--------|---------|---------|------|------|
| ATOM | 2122 | C10 | LIG | 120 | 10.270 | -18.356 | -17.844 | 1.00 | 0.00 |
| ATOM | 2123 | C11 | LIG | 120 | 11.024 | -25.084 | -22.813 | 1.00 | 0.00 |
| ATOM | 2124 | C12 | LIG | 120 | 11.125 | -14.943 | -17.201 | 1.00 | 0.00 |
| ATOM | 2125 | C13 | LIG | 120 | 11.254 | -24.325 | -23.972 | 1.00 | 0.00 |
| ATOM | 2126 | H8  | LIG | 120 | 11.035 | -23.266 | -23.968 | 1.00 | 0.00 |
| ATOM | 2127 | C14 | LIG | 120 | 11.239 | -26.470 | -22.827 | 1.00 | 0.00 |
| ATOM | 2128 | H9  | LIG | 120 | 11.035 | -27.051 | -21.937 | 1.00 | 0.00 |
| ATOM | 2129 | C15 | LIG | 120 | 11.725 | -24.941 | -25.120 | 1.00 | 0.00 |
| ATOM | 2130 | H10 | LIG | 120 | 11.902 | -24.383 | -26.029 | 1.00 | 0.00 |
| ATOM | 2131 | C16 | LIG | 120 | 11.718 | -27.091 | -23.972 | 1.00 | 0.00 |
| ATOM | 2132 | H11 | LIG | 120 | 11.901 | -28.156 | -24.003 | 1.00 | 0.00 |
| ATOM | 2133 | C17 | LIG | 120 | 11.959 | -26.315 | -25.102 | 1.00 | 0.00 |
| ATOM | 2134 | C18 | LIG | 120 | 12.453 | -14.824 | -17.643 | 1.00 | 0.00 |
| ATOM | 2135 | H12 | LIG | 120 | 12.992 | -15.705 | -17.968 | 1.00 | 0.00 |
| ATOM | 2136 | C19 | LIG | 120 | 10.445 | -13.817 | -16.715 | 1.00 | 0.00 |
| ATOM | 2137 | H13 | LIG | 120 | 9.429  | -13.925 | -16.353 | 1.00 | 0.00 |
| ATOM | 2138 | C20 | LIG | 120 | 13.072 | -13.584 | -17.624 | 1.00 | 0.00 |
| ATOM | 2139 | H14 | LIG | 120 | 14.100 | -13.490 | -17.955 | 1.00 | 0.00 |
| ATOM | 2140 | C21 | LIG | 120 | 11.070 | -12.576 | -16.710 | 1.00 | 0.00 |
| ATOM | 2141 | H15 | LIG | 120 | 10.539 | -11.707 | -16.344 | 1.00 | 0.00 |
| ATOM | 2142 | C22 | LIG | 120 | 12.383 | -12.456 | -17.166 | 1.00 | 0.00 |
| ATOM | 2143 | H16 | LIG | 120 | 12.876 | -11.491 | -17.151 | 1.00 | 0.00 |

TER

|      |      |    |     |     |         |         |        |      |      |
|------|------|----|-----|-----|---------|---------|--------|------|------|
| ATOM | 2144 | S1 | LIG | 121 | -9.771  | -25.003 | 14.510 | 1.00 | 0.00 |
| ATOM | 2145 | S2 | LIG | 121 | -4.513  | -22.885 | 19.817 | 1.00 | 0.00 |
| ATOM | 2146 | O1 | LIG | 121 | -8.561  | -25.867 | 21.257 | 1.00 | 0.00 |
| ATOM | 2147 | H5 | LIG | 121 | -8.000  | -25.765 | 22.055 | 1.00 | 0.00 |
| ATOM | 2148 | O2 | LIG | 121 | -11.188 | -24.253 | 14.424 | 1.00 | 0.00 |
| ATOM | 2149 | H6 | LIG | 121 | -11.798 | -24.846 | 14.958 | 1.00 | 0.00 |
| ATOM | 2150 | O3 | LIG | 121 | -3.445  | -23.963 | 20.345 | 1.00 | 0.00 |
| ATOM | 2151 | H7 | LIG | 121 | -3.848  | -24.308 | 21.193 | 1.00 | 0.00 |
| ATOM | 2152 | O4 | LIG | 121 | -8.802  | -24.142 | 13.864 | 1.00 | 0.00 |
| ATOM | 2153 | O5 | LIG | 121 | -9.919  | -26.395 | 14.110 | 1.00 | 0.00 |
| ATOM | 2154 | O6 | LIG | 121 | -4.042  | -22.423 | 18.527 | 1.00 | 0.00 |
| ATOM | 2155 | O7 | LIG | 121 | -4.832  | -21.947 | 20.883 | 1.00 | 0.00 |
| ATOM | 2156 | O8 | LIG | 121 | -17.019 | -30.130 | 16.075 | 1.00 | 0.00 |
| ATOM | 2157 | O9 | LIG | 121 | -17.759 | -28.615 | 14.708 | 1.00 | 0.00 |
| ATOM | 2158 | N1 | LIG | 121 | -10.528 | -26.355 | 19.544 | 1.00 | 0.00 |
| ATOM | 2159 | H3 | LIG | 121 | -10.198 | -26.489 | 20.486 | 1.00 | 0.00 |
| ATOM | 2160 | H4 | LIG | 121 | -11.392 | -26.768 | 19.227 | 1.00 | 0.00 |
| ATOM | 2161 | N2 | LIG | 121 | -11.445 | -26.306 | 17.109 | 1.00 | 0.00 |
| ATOM | 2162 | N3 | LIG | 121 | -6.330  | -24.831 | 21.908 | 1.00 | 0.00 |
| ATOM | 2163 | N4 | LIG | 121 | -12.170 | -26.077 | 16.097 | 1.00 | 0.00 |
| ATOM | 2164 | N5 | LIG | 121 | -5.149  | -24.646 | 22.309 | 1.00 | 0.00 |

|      |      |     |     |     |         |         |        |      |      |
|------|------|-----|-----|-----|---------|---------|--------|------|------|
| ATOM | 2165 | N6  | LIG | 121 | -16.910 | -29.077 | 15.458 | 1.00 | 0.00 |
| ATOM | 2166 | C1  | LIG | 121 | -8.489  | -25.154 | 18.974 | 1.00 | 0.00 |
| ATOM | 2167 | C2  | LIG | 121 | -7.750  | -24.471 | 17.966 | 1.00 | 0.00 |
| ATOM | 2168 | C3  | LIG | 121 | -9.758  | -25.751 | 18.624 | 1.00 | 0.00 |
| ATOM | 2169 | C4  | LIG | 121 | -9.430  | -24.994 | 16.298 | 1.00 | 0.00 |
| ATOM | 2170 | C5  | LIG | 121 | -8.239  | -24.416 | 16.637 | 1.00 | 0.00 |
| ATOM | 2171 | H1  | LIG | 121 | -7.648  | -23.928 | 15.873 | 1.00 | 0.00 |
| ATOM | 2172 | C6  | LIG | 121 | -7.918  | -25.209 | 20.271 | 1.00 | 0.00 |
| ATOM | 2173 | C7  | LIG | 121 | -5.990  | -23.905 | 19.545 | 1.00 | 0.00 |
| ATOM | 2174 | C8  | LIG | 121 | -6.520  | -23.845 | 18.284 | 1.00 | 0.00 |
| ATOM | 2175 | H2  | LIG | 121 | -5.991  | -23.296 | 17.515 | 1.00 | 0.00 |
| ATOM | 2176 | C9  | LIG | 121 | -10.237 | -25.665 | 17.274 | 1.00 | 0.00 |
| ATOM | 2177 | C10 | LIG | 121 | -6.670  | -24.617 | 20.578 | 1.00 | 0.00 |
| ATOM | 2178 | C11 | LIG | 121 | -13.331 | -26.866 | 15.985 | 1.00 | 0.00 |
| ATOM | 2179 | C12 | LIG | 121 | -4.909  | -24.831 | 23.684 | 1.00 | 0.00 |
| ATOM | 2180 | C13 | LIG | 121 | -13.507 | -28.087 | 16.659 | 1.00 | 0.00 |
| ATOM | 2181 | H8  | LIG | 121 | -12.713 | -28.468 | 17.287 | 1.00 | 0.00 |
| ATOM | 2182 | C14 | LIG | 121 | -14.324 | -26.395 | 15.115 | 1.00 | 0.00 |
| ATOM | 2183 | H9  | LIG | 121 | -14.169 | -25.466 | 14.581 | 1.00 | 0.00 |
| ATOM | 2184 | C15 | LIG | 121 | -14.676 | -28.808 | 16.487 | 1.00 | 0.00 |
| ATOM | 2185 | H10 | LIG | 121 | -14.835 | -29.754 | 16.985 | 1.00 | 0.00 |
| ATOM | 2186 | C16 | LIG | 121 | -15.501 | -27.111 | 14.945 | 1.00 | 0.00 |



|      |      |     |     |     |         |         |         |      |      |
|------|------|-----|-----|-----|---------|---------|---------|------|------|
| ATOM | 2187 | H11 | LIG | 121 | -16.285 | -26.762 | 14.287  | 1.00 | 0.00 |
| ATOM | 2188 | C17 | LIG | 121 | -15.662 | -28.306 | 15.639  | 1.00 | 0.00 |
| ATOM | 2189 | C18 | LIG | 121 | -5.920  | -24.892 | 24.658  | 1.00 | 0.00 |
| ATOM | 2190 | H12 | LIG | 121 | -6.954  | -24.766 | 24.367  | 1.00 | 0.00 |
| ATOM | 2191 | C19 | LIG | 121 | -3.562  | -24.926 | 24.064  | 1.00 | 0.00 |
| ATOM | 2192 | H13 | LIG | 121 | -2.790  | -24.851 | 23.308  | 1.00 | 0.00 |
| ATOM | 2193 | C20 | LIG | 121 | -5.577  | -25.078 | 25.988  | 1.00 | 0.00 |
| ATOM | 2194 | H14 | LIG | 121 | -6.354  | -25.115 | 26.743  | 1.00 | 0.00 |
| ATOM | 2195 | C21 | LIG | 121 | -3.230  | -25.123 | 25.399  | 1.00 | 0.00 |
| ATOM | 2196 | H15 | LIG | 121 | -2.190  | -25.205 | 25.688  | 1.00 | 0.00 |
| ATOM | 2197 | C22 | LIG | 121 | -4.235  | -25.201 | 26.363  | 1.00 | 0.00 |
| ATOM | 2198 | H16 | LIG | 121 | -3.976  | -25.342 | 27.406  | 1.00 | 0.00 |
| TER  |      |     |     |     |         |         |         |      |      |
| ATOM | 2199 | S1  | LIG | 122 | -16.117 | -18.440 | -16.385 | 1.00 | 0.00 |
| ATOM | 2200 | S2  | LIG | 122 | -8.784  | -17.707 | -13.936 | 1.00 | 0.00 |
| ATOM | 2201 | O1  | LIG | 122 | -11.120 | -13.669 | -16.301 | 1.00 | 0.00 |
| ATOM | 2202 | H5  | LIG | 122 | -10.234 | -13.350 | -16.028 | 1.00 | 0.00 |
| ATOM | 2203 | O2  | LIG | 122 | -16.435 | -18.697 | -17.937 | 1.00 | 0.00 |
| ATOM | 2204 | H6  | LIG | 122 | -16.630 | -17.777 | -18.290 | 1.00 | 0.00 |
| ATOM | 2205 | O3  | LIG | 122 | -8.475  | -16.842 | -12.617 | 1.00 | 0.00 |
| ATOM | 2206 | H7  | LIG | 122 | -8.221  | -15.942 | -12.973 | 1.00 | 0.00 |
| ATOM | 2207 | O4  | LIG | 122 | -15.700 | -19.710 | -15.827 | 1.00 | 0.00 |

|      |      |    |     |     |         |         |         |      |      |
|------|------|----|-----|-----|---------|---------|---------|------|------|
| ATOM | 2208 | O5 | LIG | 122 | -17.194 | -17.673 | -15.776 | 1.00 | 0.00 |
| ATOM | 2209 | O6 | LIG | 122 | -9.267  | -18.997 | -13.488 | 1.00 | 0.00 |
| ATOM | 2210 | O7 | LIG | 122 | -7.671  | -17.601 | -14.866 | 1.00 | 0.00 |
| ATOM | 2211 | O8 | LIG | 122 | -20.924 | -12.028 | -20.514 | 1.00 | 0.00 |
| ATOM | 2212 | O9 | LIG | 122 | -21.467 | -13.835 | -21.587 | 1.00 | 0.00 |
| ATOM | 2213 | N1 | LIG | 122 | -13.508 | -13.981 | -17.415 | 1.00 | 0.00 |
| ATOM | 2214 | H3 | LIG | 122 | -12.744 | -13.344 | -17.259 | 1.00 | 0.00 |
| ATOM | 2215 | H4 | LIG | 122 | -14.344 | -13.690 | -17.899 | 1.00 | 0.00 |
| ATOM | 2216 | N2 | LIG | 122 | -15.665 | -15.402 | -17.734 | 1.00 | 0.00 |
| ATOM | 2217 | N3 | LIG | 122 | -9.099  | -14.510 | -15.003 | 1.00 | 0.00 |
| ATOM | 2218 | N4 | LIG | 122 | -16.610 | -16.059 | -18.260 | 1.00 | 0.00 |
| ATOM | 2219 | N5 | LIG | 122 | -8.177  | -14.658 | -14.156 | 1.00 | 0.00 |
| ATOM | 2220 | N6 | LIG | 122 | -20.777 | -13.213 | -20.791 | 1.00 | 0.00 |
| ATOM | 2221 | C1 | LIG | 122 | -12.375 | -15.699 | -16.113 | 1.00 | 0.00 |
| ATOM | 2222 | C2 | LIG | 122 | -12.417 | -17.025 | -15.597 | 1.00 | 0.00 |
| ATOM | 2223 | C3 | LIG | 122 | -13.513 | -15.202 | -16.852 | 1.00 | 0.00 |
| ATOM | 2224 | C4 | LIG | 122 | -14.660 | -17.351 | -16.457 | 1.00 | 0.00 |
| ATOM | 2225 | C5 | LIG | 122 | -13.574 | -17.823 | -15.774 | 1.00 | 0.00 |
| ATOM | 2226 | H1 | LIG | 122 | -13.608 | -18.815 | -15.342 | 1.00 | 0.00 |
| ATOM | 2227 | C6 | LIG | 122 | -11.203 | -14.941 | -15.858 | 1.00 | 0.00 |
| ATOM | 2228 | C7 | LIG | 122 | -10.180 | -16.808 | -14.669 | 1.00 | 0.00 |
| ATOM | 2229 | C8 | LIG | 122 | -11.304 | -17.555 | -14.899 | 1.00 | 0.00 |

|      |      |     |     |     |         |         |         |      |      |
|------|------|-----|-----|-----|---------|---------|---------|------|------|
| ATOM | 2230 | H2  | LIG | 122 | -11.338 | -18.578 | -14.548 | 1.00 | 0.00 |
| ATOM | 2231 | C9  | LIG | 122 | -14.666 | -16.038 | -17.031 | 1.00 | 0.00 |
| ATOM | 2232 | C10 | LIG | 122 | -10.107 | -15.458 | -15.128 | 1.00 | 0.00 |
| ATOM | 2233 | C11 | LIG | 122 | -17.626 | -15.294 | -18.864 | 1.00 | 0.00 |
| ATOM | 2234 | C12 | LIG | 122 | -7.166  | -13.678 | -14.140 | 1.00 | 0.00 |
| ATOM | 2235 | C13 | LIG | 122 | -17.849 | -13.937 | -18.576 | 1.00 | 0.00 |
| ATOM | 2236 | H8  | LIG | 122 | -17.231 | -13.439 | -17.842 | 1.00 | 0.00 |
| ATOM | 2237 | C14 | LIG | 122 | -18.465 | -15.968 | -19.763 | 1.00 | 0.00 |
| ATOM | 2238 | H9  | LIG | 122 | -18.302 | -17.020 | -19.959 | 1.00 | 0.00 |
| ATOM | 2239 | C15 | LIG | 122 | -18.878 | -13.257 | -19.207 | 1.00 | 0.00 |
| ATOM | 2240 | H10 | LIG | 122 | -19.078 | -12.215 | -18.998 | 1.00 | 0.00 |
| ATOM | 2241 | C16 | LIG | 122 | -19.493 | -15.290 | -20.403 | 1.00 | 0.00 |
| ATOM | 2242 | H11 | LIG | 122 | -20.145 | -15.786 | -21.107 | 1.00 | 0.00 |
| ATOM | 2243 | C17 | LIG | 122 | -19.681 | -13.941 | -20.119 | 1.00 | 0.00 |
| ATOM | 2244 | C18 | LIG | 122 | -6.950  | -12.754 | -15.177 | 1.00 | 0.00 |
| ATOM | 2245 | H12 | LIG | 122 | -7.565  | -12.791 | -16.066 | 1.00 | 0.00 |
| ATOM | 2246 | C19 | LIG | 122 | -6.328  | -13.679 | -13.016 | 1.00 | 0.00 |
| ATOM | 2247 | H13 | LIG | 122 | -6.487  | -14.413 | -12.235 | 1.00 | 0.00 |
| ATOM | 2248 | C20 | LIG | 122 | -5.925  | -11.827 | -15.064 | 1.00 | 0.00 |
| ATOM | 2249 | H14 | LIG | 122 | -5.749  | -11.119 | -15.865 | 1.00 | 0.00 |
| ATOM | 2250 | C21 | LIG | 122 | -5.310  | -12.739 | -12.907 | 1.00 | 0.00 |
| ATOM | 2251 | H15 | LIG | 122 | -4.671  | -12.736 | -12.033 | 1.00 | 0.00 |

|      |      |     |     |     |         |         |         |      |      |
|------|------|-----|-----|-----|---------|---------|---------|------|------|
| ATOM | 2252 | C22 | LIG | 122 | -5.108  | -11.810 | -13.928 | 1.00 | 0.00 |
| ATOM | 2253 | H16 | LIG | 122 | -4.307  | -11.085 | -13.850 | 1.00 | 0.00 |
| TER  |      |     |     |     |         |         |         |      |      |
| ATOM | 2254 | S1  | LIG | 123 | -21.049 | 8.985   | 10.753  | 1.00 | 0.00 |
| ATOM | 2255 | S2  | LIG | 123 | -27.312 | 13.422  | 9.570   | 1.00 | 0.00 |
| ATOM | 2256 | O1  | LIG | 123 | -24.147 | 14.465  | 13.601  | 1.00 | 0.00 |
| ATOM | 2257 | H5  | LIG | 123 | -24.832 | 15.167  | 13.603  | 1.00 | 0.00 |
| ATOM | 2258 | O2  | LIG | 123 | -21.058 | 7.853   | 11.889  | 1.00 | 0.00 |
| ATOM | 2259 | H6  | LIG | 123 | -20.625 | 8.306   | 12.674  | 1.00 | 0.00 |
| ATOM | 2260 | O3  | LIG | 123 | -27.131 | 14.898  | 8.959   | 1.00 | 0.00 |
| ATOM | 2261 | H7  | LIG | 123 | -27.124 | 15.493  | 9.764   | 1.00 | 0.00 |
| ATOM | 2262 | O4  | LIG | 123 | -21.775 | 8.447   | 9.620   | 1.00 | 0.00 |
| ATOM | 2263 | O5  | LIG | 123 | -19.705 | 9.522   | 10.595  | 1.00 | 0.00 |
| ATOM | 2264 | O6  | LIG | 123 | -27.218 | 12.494  | 8.461   | 1.00 | 0.00 |
| ATOM | 2265 | O7  | LIG | 123 | -28.450 | 13.402  | 10.476  | 1.00 | 0.00 |
| ATOM | 2266 | O8  | LIG | 123 | -15.052 | 10.058  | 17.397  | 1.00 | 0.00 |
| ATOM | 2267 | O9  | LIG | 123 | -15.288 | 7.903   | 17.274  | 1.00 | 0.00 |
| ATOM | 2268 | N1  | LIG | 123 | -22.177 | 12.795  | 14.211  | 1.00 | 0.00 |
| ATOM | 2269 | H3  | LIG | 123 | -22.661 | 13.638  | 14.476  | 1.00 | 0.00 |
| ATOM | 2270 | H4  | LIG | 123 | -21.370 | 12.470  | 14.721  | 1.00 | 0.00 |
| ATOM | 2271 | N2  | LIG | 123 | -20.671 | 10.773  | 13.567  | 1.00 | 0.00 |
| ATOM | 2272 | N3  | LIG | 123 | -26.125 | 15.213  | 12.186  | 1.00 | 0.00 |

|      |      |     |     |     |         |        |        |      |      |
|------|------|-----|-----|-----|---------|--------|--------|------|------|
| ATOM | 2273 | N4  | LIG | 123 | -20.078 | 9.655  | 13.587 | 1.00 | 0.00 |
| ATOM | 2274 | N5  | LIG | 123 | -26.915 | 15.872 | 11.456 | 1.00 | 0.00 |
| ATOM | 2275 | N6  | LIG | 123 | -15.615 | 9.048  | 16.992 | 1.00 | 0.00 |
| ATOM | 2276 | C1  | LIG | 123 | -23.611 | 12.558 | 12.258 | 1.00 | 0.00 |
| ATOM | 2277 | C2  | LIG | 123 | -23.932 | 11.794 | 11.100 | 1.00 | 0.00 |
| ATOM | 2278 | C3  | LIG | 123 | -22.491 | 12.151 | 13.074 | 1.00 | 0.00 |
| ATOM | 2279 | C4  | LIG | 123 | -22.065 | 10.299 | 11.500 | 1.00 | 0.00 |
| ATOM | 2280 | C5  | LIG | 123 | -23.136 | 10.677 | 10.740 | 1.00 | 0.00 |
| ATOM | 2281 | H1  | LIG | 123 | -23.367 | 10.130 | 9.835  | 1.00 | 0.00 |
| ATOM | 2282 | C6  | LIG | 123 | -24.422 | 13.689 | 12.533 | 1.00 | 0.00 |
| ATOM | 2283 | C7  | LIG | 123 | -25.819 | 13.238 | 10.585 | 1.00 | 0.00 |
| ATOM | 2284 | C8  | LIG | 123 | -25.045 | 12.145 | 10.298 | 1.00 | 0.00 |
| ATOM | 2285 | H2  | LIG | 123 | -25.298 | 11.530 | 9.444  | 1.00 | 0.00 |
| ATOM | 2286 | C9  | LIG | 123 | -21.713 | 11.006 | 12.695 | 1.00 | 0.00 |
| ATOM | 2287 | C10 | LIG | 123 | -25.511 | 14.062 | 11.709 | 1.00 | 0.00 |
| ATOM | 2288 | C11 | LIG | 123 | -18.965 | 9.569  | 14.445 | 1.00 | 0.00 |
| ATOM | 2289 | C12 | LIG | 123 | -27.537 | 16.991 | 12.041 | 1.00 | 0.00 |
| ATOM | 2290 | C13 | LIG | 123 | -18.272 | 10.691 | 14.931 | 1.00 | 0.00 |
| ATOM | 2291 | H8  | LIG | 123 | -18.582 | 11.682 | 14.628 | 1.00 | 0.00 |
| ATOM | 2292 | C14 | LIG | 123 | -18.529 | 8.278  | 14.775 | 1.00 | 0.00 |
| ATOM | 2293 | H9  | LIG | 123 | -19.054 | 7.419  | 14.376 | 1.00 | 0.00 |
| ATOM | 2294 | C15 | LIG | 123 | -17.179 | 10.520 | 15.764 | 1.00 | 0.00 |

|      |      |     |     |     |         |         |        |      |      |
|------|------|-----|-----|-----|---------|---------|--------|------|------|
| ATOM | 2295 | H10 | LIG | 123 | -16.621 | 11.365  | 16.145 | 1.00 | 0.00 |
| ATOM | 2296 | C16 | LIG | 123 | -17.439 | 8.101   | 15.615 | 1.00 | 0.00 |
| ATOM | 2297 | H11 | LIG | 123 | -17.092 | 7.116   | 15.892 | 1.00 | 0.00 |
| ATOM | 2298 | C17 | LIG | 123 | -16.782 | 9.228   | 16.102 | 1.00 | 0.00 |
| ATOM | 2299 | C18 | LIG | 123 | -27.584 | 17.230  | 13.425 | 1.00 | 0.00 |
| ATOM | 2300 | H12 | LIG | 123 | -27.148 | 16.515  | 14.109 | 1.00 | 0.00 |
| ATOM | 2301 | C19 | LIG | 123 | -28.159 | 17.881  | 11.154 | 1.00 | 0.00 |
| ATOM | 2302 | H13 | LIG | 123 | -28.139 | 17.673  | 10.091 | 1.00 | 0.00 |
| ATOM | 2303 | C20 | LIG | 123 | -28.222 | 18.365  | 13.901 | 1.00 | 0.00 |
| ATOM | 2304 | H14 | LIG | 123 | -28.270 | 18.548  | 14.968 | 1.00 | 0.00 |
| ATOM | 2305 | C21 | LIG | 123 | -28.788 | 19.021  | 11.640 | 1.00 | 0.00 |
| ATOM | 2306 | H15 | LIG | 123 | -29.259 | 19.711  | 10.952 | 1.00 | 0.00 |
| ATOM | 2307 | C22 | LIG | 123 | -28.819 | 19.267  | 13.013 | 1.00 | 0.00 |
| ATOM | 2308 | H16 | LIG | 123 | -29.319 | 20.149  | 13.394 | 1.00 | 0.00 |
| TER  |      |     |     |     |         |         |        |      |      |
| ATOM | 2309 | S1  | LIG | 124 | -15.611 | -25.205 | 7.386  | 1.00 | 0.00 |
| ATOM | 2310 | S2  | LIG | 124 | -11.234 | -25.150 | 0.971  | 1.00 | 0.00 |
| ATOM | 2311 | O1  | LIG | 124 | -13.234 | -20.659 | 2.756  | 1.00 | 0.00 |
| ATOM | 2312 | H5  | LIG | 124 | -12.679 | -20.423 | 1.983  | 1.00 | 0.00 |
| ATOM | 2313 | O2  | LIG | 124 | -17.210 | -25.124 | 7.280  | 1.00 | 0.00 |
| ATOM | 2314 | H6  | LIG | 124 | -17.403 | -24.146 | 7.410  | 1.00 | 0.00 |
| ATOM | 2315 | O3  | LIG | 124 | -9.730  | -24.588 | 1.046  | 1.00 | 0.00 |

|      |      |    |     |     |         |         |        |      |      |
|------|------|----|-----|-----|---------|---------|--------|------|------|
| ATOM | 2316 | H7 | LIG | 124 | -9.812  | -23.638 | 0.741  | 1.00 | 0.00 |
| ATOM | 2317 | O4 | LIG | 124 | -15.240 | -26.572 | 7.082  | 1.00 | 0.00 |
| ATOM | 2318 | O5 | LIG | 124 | -15.160 | -24.560 | 8.611  | 1.00 | 0.00 |
| ATOM | 2319 | O6 | LIG | 124 | -11.206 | -26.496 | 1.508  | 1.00 | 0.00 |
| ATOM | 2320 | O7 | LIG | 124 | -11.797 | -24.874 | -0.341 | 1.00 | 0.00 |
| ATOM | 2321 | O8 | LIG | 124 | -19.427 | -17.973 | 11.182 | 1.00 | 0.00 |
| ATOM | 2322 | O9 | LIG | 124 | -20.956 | -19.503 | 11.363 | 1.00 | 0.00 |
| ATOM | 2323 | N1 | LIG | 124 | -14.973 | -20.683 | 4.760  | 1.00 | 0.00 |
| ATOM | 2324 | H3 | LIG | 124 | -14.494 | -20.108 | 4.086  | 1.00 | 0.00 |
| ATOM | 2325 | H4 | LIG | 124 | -15.587 | -20.280 | 5.451  | 1.00 | 0.00 |
| ATOM | 2326 | N2 | LIG | 124 | -16.133 | -21.960 | 6.708  | 1.00 | 0.00 |
| ATOM | 2327 | N3 | LIG | 124 | -11.657 | -21.795 | 1.113  | 1.00 | 0.00 |
| ATOM | 2328 | N4 | LIG | 124 | -17.012 | -22.474 | 7.460  | 1.00 | 0.00 |
| ATOM | 2329 | N5 | LIG | 124 | -10.649 | -22.136 | 0.437  | 1.00 | 0.00 |
| ATOM | 2330 | N6 | LIG | 124 | -19.896 | -19.076 | 10.926 | 1.00 | 0.00 |
| ATOM | 2331 | C1 | LIG | 124 | -13.807 | -22.657 | 3.943  | 1.00 | 0.00 |
| ATOM | 2332 | C2 | LIG | 124 | -13.607 | -24.061 | 4.070  | 1.00 | 0.00 |
| ATOM | 2333 | C3 | LIG | 124 | -14.697 | -21.994 | 4.868  | 1.00 | 0.00 |
| ATOM | 2334 | C4 | LIG | 124 | -15.072 | -24.154 | 6.000  | 1.00 | 0.00 |
| ATOM | 2335 | C5 | LIG | 124 | -14.243 | -24.781 | 5.112  | 1.00 | 0.00 |
| ATOM | 2336 | H1 | LIG | 124 | -14.050 | -25.840 | 5.222  | 1.00 | 0.00 |
| ATOM | 2337 | C6 | LIG | 124 | -13.103 | -21.994 | 2.906  | 1.00 | 0.00 |

|      |      |     |     |     |         |         |        |      |      |
|------|------|-----|-----|-----|---------|---------|--------|------|------|
| ATOM | 2338 | C7  | LIG | 124 | -12.103 | -24.089 | 2.160  | 1.00 | 0.00 |
| ATOM | 2339 | C8  | LIG | 124 | -12.768 | -24.748 | 3.159  | 1.00 | 0.00 |
| ATOM | 2340 | H2  | LIG | 124 | -12.659 | -25.822 | 3.246  | 1.00 | 0.00 |
| ATOM | 2341 | C9  | LIG | 124 | -15.341 | -22.750 | 5.903  | 1.00 | 0.00 |
| ATOM | 2342 | C10 | LIG | 124 | -12.235 | -22.674 | 2.019  | 1.00 | 0.00 |
| ATOM | 2343 | C11 | LIG | 124 | -17.689 | -21.578 | 8.311  | 1.00 | 0.00 |
| ATOM | 2344 | C12 | LIG | 124 | -10.166 | -21.202 | -0.499 | 1.00 | 0.00 |
| ATOM | 2345 | C13 | LIG | 124 | -17.194 | -20.308 | 8.650  | 1.00 | 0.00 |
| ATOM | 2346 | H8  | LIG | 124 | -16.236 | -19.988 | 8.261  | 1.00 | 0.00 |
| ATOM | 2347 | C14 | LIG | 124 | -18.895 | -22.032 | 8.863  | 1.00 | 0.00 |
| ATOM | 2348 | H9  | LIG | 124 | -19.256 | -23.022 | 8.616  | 1.00 | 0.00 |
| ATOM | 2349 | C15 | LIG | 124 | -17.915 | -19.490 | 9.503  | 1.00 | 0.00 |
| ATOM | 2350 | H10 | LIG | 124 | -17.555 | -18.511 | 9.787  | 1.00 | 0.00 |
| ATOM | 2351 | C16 | LIG | 124 | -19.626 | -21.214 | 9.713  | 1.00 | 0.00 |
| ATOM | 2352 | H11 | LIG | 124 | -20.564 | -21.538 | 10.141 | 1.00 | 0.00 |
| ATOM | 2353 | C17 | LIG | 124 | -19.127 | -19.951 | 10.016 | 1.00 | 0.00 |
| ATOM | 2354 | C18 | LIG | 124 | -10.894 | -20.085 | -0.944 | 1.00 | 0.00 |
| ATOM | 2355 | H12 | LIG | 124 | -11.901 | -19.922 | -0.582 | 1.00 | 0.00 |
| ATOM | 2356 | C19 | LIG | 124 | -8.887  | -21.455 | -1.016 | 1.00 | 0.00 |
| ATOM | 2357 | H13 | LIG | 124 | -8.345  | -22.334 | -0.685 | 1.00 | 0.00 |
| ATOM | 2358 | C20 | LIG | 124 | -10.327 | -19.224 | -1.870 | 1.00 | 0.00 |
| ATOM | 2359 | H14 | LIG | 124 | -10.890 | -18.367 | -2.222 | 1.00 | 0.00 |



|      |      |     |     |     |        |         |        |      |      |
|------|------|-----|-----|-----|--------|---------|--------|------|------|
| ATOM | 2360 | C21 | LIG | 124 | -8.324 | -20.579 | -1.936 | 1.00 | 0.00 |
| ATOM | 2361 | H15 | LIG | 124 | -7.332 | -20.773 | -2.325 | 1.00 | 0.00 |
| ATOM | 2362 | C22 | LIG | 124 | -9.040 | -19.462 | -2.363 | 1.00 | 0.00 |
| ATOM | 2363 | H16 | LIG | 124 | -8.607 | -18.785 | -3.090 | 1.00 | 0.00 |
| TER  |      |     |     |     |        |         |        |      |      |
| END  |      |     |     |     |        |         |        |      |      |

**Table G:** The number of atoms present in the system of BE-SIs

|      |    |     |     |   |       |        |        |      |      |
|------|----|-----|-----|---|-------|--------|--------|------|------|
| ATOM | 1  | N   | GLU | 1 | 4.907 | 18.557 | -2.106 | 1.00 | 0.00 |
| ATOM | 2  | H1  | GLU | 1 | 5.217 | 19.172 | -2.844 | 1.00 | 0.00 |
| ATOM | 3  | H2  | GLU | 1 | 5.314 | 17.644 | -2.252 | 1.00 | 0.00 |
| ATOM | 4  | H3  | GLU | 1 | 5.027 | 19.027 | -1.220 | 1.00 | 0.00 |
| ATOM | 5  | CA  | GLU | 1 | 3.437 | 18.361 | -2.252 | 1.00 | 0.00 |
| ATOM | 6  | HA  | GLU | 1 | 3.208 | 17.304 | -2.392 | 1.00 | 0.00 |
| ATOM | 7  | CB  | GLU | 1 | 2.730 | 18.851 | -0.985 | 1.00 | 0.00 |
| ATOM | 8  | HB2 | GLU | 1 | 3.151 | 18.345 | -0.116 | 1.00 | 0.00 |
| ATOM | 9  | HB3 | GLU | 1 | 2.873 | 19.926 | -0.883 | 1.00 | 0.00 |
| ATOM | 10 | CG  | GLU | 1 | 1.232 | 18.542 | -1.080 | 1.00 | 0.00 |
| ATOM | 11 | HG2 | GLU | 1 | 0.835 | 18.986 | -1.992 | 1.00 | 0.00 |
| ATOM | 12 | HG3 | GLU | 1 | 1.088 | 17.462 | -1.109 | 1.00 | 0.00 |
| ATOM | 13 | CD  | GLU | 1 | 0.500 | 19.120 | 0.127  | 1.00 | 0.00 |
| ATOM | 14 | OE1 | GLU | 1 | 0.629 | 18.554 | 1.201  | 1.00 | 0.00 |

|      |    |     |     |   |        |        |        |      |      |
|------|----|-----|-----|---|--------|--------|--------|------|------|
| ATOM | 15 | OE2 | GLU | 1 | -0.182 | 20.118 | -0.040 | 1.00 | 0.00 |
| ATOM | 16 | C   | GLU | 1 | 2.941  | 19.142 | -3.467 | 1.00 | 0.00 |
| ATOM | 17 | O   | GLU | 1 | 2.796  | 20.364 | -3.414 | 1.00 | 0.00 |
| ATOM | 18 | N   | ALA | 2 | 2.681  | 18.425 | -4.558 | 1.00 | 0.00 |
| ATOM | 19 | H   | ALA | 2 | 2.833  | 17.426 | -4.560 | 1.00 | 0.00 |
| ATOM | 20 | CA  | ALA | 2 | 2.197  | 19.055 | -5.783 | 1.00 | 0.00 |
| ATOM | 21 | HA  | ALA | 2 | 2.853  | 19.878 | -6.066 | 1.00 | 0.00 |
| ATOM | 22 | CB  | ALA | 2 | 2.173  | 18.035 | -6.923 | 1.00 | 0.00 |
| ATOM | 23 | HB1 | ALA | 2 | 1.513  | 17.209 | -6.658 | 1.00 | 0.00 |
| ATOM | 24 | HB2 | ALA | 2 | 1.809  | 18.513 | -7.832 | 1.00 | 0.00 |
| ATOM | 25 | HB3 | ALA | 2 | 3.181  | 17.654 | -7.092 | 1.00 | 0.00 |
| ATOM | 26 | C   | ALA | 2 | 0.796  | 19.623 | -5.578 | 1.00 | 0.00 |
| ATOM | 27 | O   | ALA | 2 | 0.003  | 19.080 | -4.810 | 1.00 | 0.00 |
| ATOM | 28 | N   | GLU | 3 | 0.501  | 20.719 | -6.270 | 1.00 | 0.00 |
| ATOM | 29 | H   | GLU | 3 | 1.194  | 21.146 | -6.867 | 1.00 | 0.00 |
| ATOM | 30 | CA  | GLU | 3 | -0.808 | 21.357 | -6.162 | 1.00 | 0.00 |
| ATOM | 31 | HA  | GLU | 3 | -1.019 | 21.600 | -5.120 | 1.00 | 0.00 |
| ATOM | 32 | CB  | GLU | 3 | -0.833 | 22.655 | -6.984 | 1.00 | 0.00 |
| ATOM | 33 | HB2 | GLU | 3 | -1.728 | 23.221 | -6.726 | 1.00 | 0.00 |
| ATOM | 34 | HB3 | GLU | 3 | 0.052  | 23.245 | -6.743 | 1.00 | 0.00 |
| ATOM | 35 | CG  | GLU | 3 | -0.843 | 22.338 | -8.487 | 1.00 | 0.00 |
| ATOM | 36 | HG2 | GLU | 3 | -1.724 | 21.740 | -8.719 | 1.00 | 0.00 |

|      |    |     |     |   |        |        |         |      |      |
|------|----|-----|-----|---|--------|--------|---------|------|------|
| ATOM | 37 | HG3 | GLU | 3 | -0.882 | 23.273 | -9.045  | 1.00 | 0.00 |
| ATOM | 38 | CD  | GLU | 3 | 0.415  | 21.563 | -8.879  | 1.00 | 0.00 |
| ATOM | 39 | OE1 | GLU | 3 | 1.500  | 22.068 | -8.641  | 1.00 | 0.00 |
| ATOM | 40 | OE2 | GLU | 3 | 0.274  | 20.473 | -9.411  | 1.00 | 0.00 |
| ATOM | 41 | C   | GLU | 3 | -1.911 | 20.416 | -6.645  | 1.00 | 0.00 |
| ATOM | 42 | O   | GLU | 3 | -3.069 | 20.547 | -6.246  | 1.00 | 0.00 |
| ATOM | 43 | N   | ALA | 4 | -1.541 | 19.472 | -7.508  | 1.00 | 0.00 |
| ATOM | 44 | H   | ALA | 4 | -0.585 | 19.424 | -7.831  | 1.00 | 0.00 |
| ATOM | 45 | CA  | ALA | 4 | -2.503 | 18.513 | -8.046  | 1.00 | 0.00 |
| ATOM | 46 | HA  | ALA | 4 | -3.400 | 19.042 | -8.366  | 1.00 | 0.00 |
| ATOM | 47 | CB  | ALA | 4 | -1.906 | 17.788 | -9.254  | 1.00 | 0.00 |
| ATOM | 48 | HB1 | ALA | 4 | -1.011 | 17.246 | -8.947  | 1.00 | 0.00 |
| ATOM | 49 | HB2 | ALA | 4 | -2.637 | 17.085 | -9.654  | 1.00 | 0.00 |
| ATOM | 50 | HB3 | ALA | 4 | -1.644 | 18.515 | -10.022 | 1.00 | 0.00 |
| ATOM | 51 | C   | ALA | 4 | -2.917 | 17.503 | -6.987  | 1.00 | 0.00 |
| ATOM | 52 | O   | ALA | 4 | -3.769 | 16.647 | -7.230  | 1.00 | 0.00 |
| ATOM | 53 | N   | GLN | 5 | -2.318 | 17.618 | -5.811  | 1.00 | 0.00 |
| ATOM | 54 | H   | GLN | 5 | -1.624 | 18.337 | -5.664  | 1.00 | 0.00 |
| ATOM | 55 | CA  | GLN | 5 | -2.632 | 16.726 | -4.705  | 1.00 | 0.00 |
| ATOM | 56 | HA  | GLN | 5 | -2.265 | 15.719 | -4.908  | 1.00 | 0.00 |
| ATOM | 57 | CB  | GLN | 5 | -1.953 | 17.247 | -3.443  | 1.00 | 0.00 |
| ATOM | 58 | HB2 | GLN | 5 | -0.877 | 17.301 | -3.610  | 1.00 | 0.00 |

|      |    |      |     |   |        |        |        |      |      |
|------|----|------|-----|---|--------|--------|--------|------|------|
| ATOM | 59 | HB3  | GLN | 5 | -2.335 | 18.242 | -3.214 | 1.00 | 0.00 |
| ATOM | 60 | CG   | GLN | 5 | -2.240 | 16.307 | -2.267 | 1.00 | 0.00 |
| ATOM | 61 | HG2  | GLN | 5 | -3.312 | 16.131 | -2.182 | 1.00 | 0.00 |
| ATOM | 62 | HG3  | GLN | 5 | -1.727 | 15.357 | -2.420 | 1.00 | 0.00 |
| ATOM | 63 | CD   | GLN | 5 | -1.743 | 16.925 | -0.964 | 1.00 | 0.00 |
| ATOM | 64 | OE1  | GLN | 5 | -2.131 | 18.041 | -0.617 | 1.00 | 0.00 |
| ATOM | 65 | NE2  | GLN | 5 | -0.905 | 16.262 | -0.216 | 1.00 | 0.00 |
| ATOM | 66 | HE21 | GLN | 5 | -0.573 | 16.667 | 0.648  | 1.00 | 0.00 |
| ATOM | 67 | HE22 | GLN | 5 | -0.591 | 15.346 | -0.504 | 1.00 | 0.00 |
| ATOM | 68 | C    | GLN | 5 | -4.141 | 16.667 | -4.480 | 1.00 | 0.00 |
| ATOM | 69 | O    | GLN | 5 | -4.691 | 15.614 | -4.158 | 1.00 | 0.00 |
| ATOM | 70 | N    | GLU | 6 | -4.800 | 17.812 | -4.647 | 1.00 | 0.00 |
| ATOM | 71 | H    | GLU | 6 | -4.298 | 18.656 | -4.882 | 1.00 | 0.00 |
| ATOM | 72 | CA   | GLU | 6 | -6.244 | 17.895 | -4.457 | 1.00 | 0.00 |
| ATOM | 73 | HA   | GLU | 6 | -6.498 | 17.703 | -3.414 | 1.00 | 0.00 |
| ATOM | 74 | CB   | GLU | 6 | -6.734 | 19.299 | -4.831 | 1.00 | 0.00 |
| ATOM | 75 | HB2  | GLU | 6 | -7.800 | 19.375 | -4.620 | 1.00 | 0.00 |
| ATOM | 76 | HB3  | GLU | 6 | -6.193 | 20.038 | -4.239 | 1.00 | 0.00 |
| ATOM | 77 | CG   | GLU | 6 | -6.488 | 19.559 | -6.322 | 1.00 | 0.00 |
| ATOM | 78 | HG2  | GLU | 6 | -5.454 | 19.311 | -6.563 | 1.00 | 0.00 |
| ATOM | 79 | HG3  | GLU | 6 | -7.158 | 18.933 | -6.911 | 1.00 | 0.00 |
| ATOM | 80 | CD   | GLU | 6 | -6.748 | 21.028 | -6.645 | 1.00 | 0.00 |

|      |     |     |     |   |        |        |         |      |      |
|------|-----|-----|-----|---|--------|--------|---------|------|------|
| ATOM | 81  | OE1 | GLU | 6 | -7.907 | 21.406 | -6.701  | 1.00 | 0.00 |
| ATOM | 82  | OE2 | GLU | 6 | -5.784 | 21.752 | -6.832  | 1.00 | 0.00 |
| ATOM | 83  | C   | GLU | 6 | -6.972 | 16.845 | -5.296  | 1.00 | 0.00 |
| ATOM | 84  | O   | GLU | 6 | -7.888 | 16.183 | -4.809  | 1.00 | 0.00 |
| ATOM | 85  | N   | GLU | 7 | -6.550 | 16.684 | -6.551  | 1.00 | 0.00 |
| ATOM | 86  | H   | GLU | 7 | -5.802 | 17.255 | -6.919  | 1.00 | 0.00 |
| ATOM | 87  | CA  | GLU | 7 | -7.162 | 15.696 | -7.431  | 1.00 | 0.00 |
| ATOM | 88  | HA  | GLU | 7 | -8.212 | 15.941 | -7.589  | 1.00 | 0.00 |
| ATOM | 89  | CB  | GLU | 7 | -6.452 | 15.680 | -8.791  | 1.00 | 0.00 |
| ATOM | 90  | HB2 | GLU | 7 | -6.649 | 16.616 | -9.312  | 1.00 | 0.00 |
| ATOM | 91  | HB3 | GLU | 7 | -5.378 | 15.569 | -8.637  | 1.00 | 0.00 |
| ATOM | 92  | CG  | GLU | 7 | -6.971 | 14.506 | -9.634  | 1.00 | 0.00 |
| ATOM | 93  | HG2 | GLU | 7 | -7.987 | 14.266 | -9.319  | 1.00 | 0.00 |
| ATOM | 94  | HG3 | GLU | 7 | -6.974 | 14.791 | -10.686 | 1.00 | 0.00 |
| ATOM | 95  | CD  | GLU | 7 | -6.077 | 13.283 | -9.441  | 1.00 | 0.00 |
| ATOM | 96  | OE1 | GLU | 7 | -4.907 | 13.368 | -9.777  | 1.00 | 0.00 |
| ATOM | 97  | OE2 | GLU | 7 | -6.576 | 12.277 | -8.964  | 1.00 | 0.00 |
| ATOM | 98  | C   | GLU | 7 | -7.072 | 14.321 | -6.795  | 1.00 | 0.00 |
| ATOM | 99  | O   | GLU | 7 | -8.012 | 13.528 | -6.856  | 1.00 | 0.00 |
| ATOM | 100 | N   | CYX | 8 | -5.919 | 14.048 | -6.193  | 1.00 | 0.00 |
| ATOM | 101 | H   | CYX | 8 | -5.169 | 14.725 | -6.185  | 1.00 | 0.00 |
| ATOM | 102 | CA  | CYX | 8 | -5.693 | 12.767 | -5.557  | 1.00 | 0.00 |

|      |     |     |     |   |        |        |        |      |      |
|------|-----|-----|-----|---|--------|--------|--------|------|------|
| ATOM | 103 | HA  | CYX | 8 | -5.950 | 11.959 | -6.242 | 1.00 | 0.00 |
| ATOM | 104 | CB  | CYX | 8 | -4.218 | 12.628 | -5.168 | 1.00 | 0.00 |
| ATOM | 105 | HB2 | CYX | 8 | -3.967 | 13.378 | -4.418 | 1.00 | 0.00 |
| ATOM | 106 | HB3 | CYX | 8 | -4.041 | 11.633 | -4.759 | 1.00 | 0.00 |
| ATOM | 107 | SG  | CYX | 8 | -3.181 | 12.867 | -6.631 | 1.00 | 0.00 |
| ATOM | 108 | C   | CYX | 8 | -6.563 | 12.618 | -4.316 | 1.00 | 0.00 |
| ATOM | 109 | O   | CYX | 8 | -7.350 | 11.678 | -4.214 | 1.00 | 0.00 |
| ATOM | 110 | N   | ARG | 9 | -6.414 | 13.552 | -3.380 | 1.00 | 0.00 |
| ATOM | 111 | H   | ARG | 9 | -5.739 | 14.293 | -3.504 | 1.00 | 0.00 |
| ATOM | 112 | CA  | ARG | 9 | -7.187 | 13.519 | -2.142 | 1.00 | 0.00 |
| ATOM | 113 | HA  | ARG | 9 | -6.921 | 12.638 | -1.557 | 1.00 | 0.00 |
| ATOM | 114 | CB  | ARG | 9 | -6.886 | 14.768 | -1.310 | 1.00 | 0.00 |
| ATOM | 115 | HB2 | ARG | 9 | -5.810 | 14.848 | -1.154 | 1.00 | 0.00 |
| ATOM | 116 | HB3 | ARG | 9 | -7.242 | 15.650 | -1.840 | 1.00 | 0.00 |
| ATOM | 117 | CG  | ARG | 9 | -7.592 | 14.668 | 0.047  | 1.00 | 0.00 |
| ATOM | 118 | HG2 | ARG | 9 | -8.671 | 14.641 | -0.106 | 1.00 | 0.00 |
| ATOM | 119 | HG3 | ARG | 9 | -7.275 | 13.757 | 0.555  | 1.00 | 0.00 |
| ATOM | 120 | CD  | ARG | 9 | -7.229 | 15.882 | 0.904  | 1.00 | 0.00 |
| ATOM | 121 | HD2 | ARG | 9 | -7.609 | 15.748 | 1.917  | 1.00 | 0.00 |
| ATOM | 122 | HD3 | ARG | 9 | -6.146 | 16.003 | 0.936  | 1.00 | 0.00 |
| ATOM | 123 | NE  | ARG | 9 | -7.819 | 17.093 | 0.339  | 1.00 | 0.00 |
| ATOM | 124 | HE  | ARG | 9 | -8.493 | 17.026 | -0.410 | 1.00 | 0.00 |

|      |     |      |     |    |         |        |        |      |      |
|------|-----|------|-----|----|---------|--------|--------|------|------|
| ATOM | 125 | CZ   | ARG | 9  | -7.486  | 18.302 | 0.789  | 1.00 | 0.00 |
| ATOM | 126 | NH1  | ARG | 9  | -6.620  | 18.427 | 1.758  | 1.00 | 0.00 |
| ATOM | 127 | HH11 | ARG | 9  | -6.202  | 17.603 | 2.167  | 1.00 | 0.00 |
| ATOM | 128 | HH12 | ARG | 9  | -6.372  | 19.346 | 2.094  | 1.00 | 0.00 |
| ATOM | 129 | NH2  | ARG | 9  | -8.029  | 19.364 | 0.262  | 1.00 | 0.00 |
| ATOM | 130 | HH21 | ARG | 9  | -8.700  | 19.265 | -0.486 | 1.00 | 0.00 |
| ATOM | 131 | HH22 | ARG | 9  | -7.775  | 20.279 | 0.605  | 1.00 | 0.00 |
| ATOM | 132 | C    | ARG | 9  | -8.682  | 13.442 | -2.434 | 1.00 | 0.00 |
| ATOM | 133 | O    | ARG | 9  | -9.405  | 12.674 | -1.802 | 1.00 | 0.00 |
| ATOM | 134 | N    | GLU | 10 | -9.140  | 14.240 | -3.395 | 1.00 | 0.00 |
| ATOM | 135 | H    | GLU | 10 | -8.517  | 14.870 | -3.880 | 1.00 | 0.00 |
| ATOM | 136 | CA   | GLU | 10 | -10.553 | 14.246 | -3.760 | 1.00 | 0.00 |
| ATOM | 137 | HA   | GLU | 10 | -11.162 | 14.519 | -2.898 | 1.00 | 0.00 |
| ATOM | 138 | CB   | GLU | 10 | -10.796 | 15.268 | -4.875 | 1.00 | 0.00 |
| ATOM | 139 | HB2  | GLU | 10 | -10.536 | 16.263 | -4.515 | 1.00 | 0.00 |
| ATOM | 140 | HB3  | GLU | 10 | -10.173 | 15.019 | -5.734 | 1.00 | 0.00 |
| ATOM | 141 | CG   | GLU | 10 | -12.273 | 15.243 | -5.289 | 1.00 | 0.00 |
| ATOM | 142 | HG2  | GLU | 10 | -12.880 | 14.949 | -4.433 | 1.00 | 0.00 |
| ATOM | 143 | HG3  | GLU | 10 | -12.567 | 16.239 | -5.618 | 1.00 | 0.00 |
| ATOM | 144 | CD   | GLU | 10 | -12.484 | 14.247 | -6.429 | 1.00 | 0.00 |
| ATOM | 145 | OE1  | GLU | 10 | -11.834 | 14.395 | -7.451 | 1.00 | 0.00 |
| ATOM | 146 | OE2  | GLU | 10 | -13.293 | 13.348 | -6.262 | 1.00 | 0.00 |

|      |     |      |     |    |         |        |        |      |      |
|------|-----|------|-----|----|---------|--------|--------|------|------|
| ATOM | 147 | C    | GLU | 10 | -10.990 | 12.862 | -4.230 | 1.00 | 0.00 |
| ATOM | 148 | O    | GLU | 10 | -12.015 | 12.338 | -3.790 | 1.00 | 0.00 |
| ATOM | 149 | N    | GLN | 11 | -10.203 | 12.283 | -5.133 | 1.00 | 0.00 |
| ATOM | 150 | H    | GLN | 11 | -9.392  | 12.772 | -5.483 | 1.00 | 0.00 |
| ATOM | 151 | CA   | GLN | 11 | -10.503 | 10.963 | -5.677 | 1.00 | 0.00 |
| ATOM | 152 | HA   | GLN | 11 | -11.481 | 10.968 | -6.158 | 1.00 | 0.00 |
| ATOM | 153 | CB   | GLN | 11 | -9.446  | 10.579 | -6.719 | 1.00 | 0.00 |
| ATOM | 154 | HB2  | GLN | 11 | -9.304  | 11.406 | -7.414 | 1.00 | 0.00 |
| ATOM | 155 | HB3  | GLN | 11 | -8.503  | 10.361 | -6.216 | 1.00 | 0.00 |
| ATOM | 156 | CG   | GLN | 11 | -9.912  | 9.339  | -7.490 | 1.00 | 0.00 |
| ATOM | 157 | HG2  | GLN | 11 | -9.988  | 8.488  | -6.812 | 1.00 | 0.00 |
| ATOM | 158 | HG3  | GLN | 11 | -10.884 | 9.529  | -7.944 | 1.00 | 0.00 |
| ATOM | 159 | CD   | GLN | 11 | -8.915  | 8.994  | -8.596 | 1.00 | 0.00 |
| ATOM | 160 | OE1  | GLN | 11 | -7.981  | 9.754  | -8.858 | 1.00 | 0.00 |
| ATOM | 161 | NE2  | GLN | 11 | -9.060  | 7.883  | -9.265 | 1.00 | 0.00 |
| ATOM | 162 | HE21 | GLN | 11 | -8.405  | 7.648  | -9.997 | 1.00 | 0.00 |
| ATOM | 163 | HE22 | GLN | 11 | -9.826  | 7.262  | -9.047 | 1.00 | 0.00 |
| ATOM | 164 | C    | GLN | 11 | -10.562 | 9.903  | -4.576 | 1.00 | 0.00 |
| ATOM | 165 | O    | GLN | 11 | -11.337 | 8.951  | -4.668 | 1.00 | 0.00 |
| ATOM | 166 | N    | MET | 12 | -9.731  | 10.061 | -3.544 | 1.00 | 0.00 |
| ATOM | 167 | H    | MET | 12 | -9.087  | 10.839 | -3.518 | 1.00 | 0.00 |
| ATOM | 168 | CA   | MET | 12 | -9.695  | 9.093  | -2.445 | 1.00 | 0.00 |



|      |     |     |     |    |         |        |        |      |      |
|------|-----|-----|-----|----|---------|--------|--------|------|------|
| ATOM | 169 | HA  | MET | 12 | -9.313  | 8.137  | -2.805 | 1.00 | 0.00 |
| ATOM | 170 | CB  | MET | 12 | -8.781  | 9.593  | -1.324 | 1.00 | 0.00 |
| ATOM | 171 | HB2 | MET | 12 | -9.068  | 10.606 | -1.043 | 1.00 | 0.00 |
| ATOM | 172 | HB3 | MET | 12 | -8.872  | 8.937  | -0.458 | 1.00 | 0.00 |
| ATOM | 173 | CG  | MET | 12 | -7.333  | 9.591  | -1.814 | 1.00 | 0.00 |
| ATOM | 174 | HG2 | MET | 12 | -7.048  | 8.581  | -2.110 | 1.00 | 0.00 |
| ATOM | 175 | HG3 | MET | 12 | -7.234  | 10.261 | -2.668 | 1.00 | 0.00 |
| ATOM | 176 | SD  | MET | 12 | -6.240  | 10.152 | -0.489 | 1.00 | 0.00 |
| ATOM | 177 | CE  | MET | 12 | -4.792  | 10.477 | -1.523 | 1.00 | 0.00 |
| ATOM | 178 | HE1 | MET | 12 | -5.041  | 11.229 | -2.271 | 1.00 | 0.00 |
| ATOM | 179 | HE2 | MET | 12 | -3.974  | 10.841 | -0.900 | 1.00 | 0.00 |
| ATOM | 180 | HE3 | MET | 12 | -4.486  | 9.556  | -2.021 | 1.00 | 0.00 |
| ATOM | 181 | C   | MET | 12 | -11.092 | 8.830  | -1.888 | 1.00 | 0.00 |
| ATOM | 182 | O   | MET | 12 | -11.433 | 7.686  | -1.589 | 1.00 | 0.00 |
| ATOM | 183 | N   | GLN | 13 | -11.902 | 9.881  | -1.757 | 1.00 | 0.00 |
| ATOM | 184 | H   | GLN | 13 | -11.594 | 10.813 | -1.993 | 1.00 | 0.00 |
| ATOM | 185 | CA  | GLN | 13 | -13.259 | 9.708  | -1.244 | 1.00 | 0.00 |
| ATOM | 186 | HA  | GLN | 13 | -13.219 | 9.302  | -0.233 | 1.00 | 0.00 |
| ATOM | 187 | CB  | GLN | 13 | -14.001 | 11.048 | -1.205 | 1.00 | 0.00 |
| ATOM | 188 | HB2 | GLN | 13 | -13.833 | 11.578 | -2.142 | 1.00 | 0.00 |
| ATOM | 189 | HB3 | GLN | 13 | -15.068 | 10.864 | -1.078 | 1.00 | 0.00 |
| ATOM | 190 | CG  | GLN | 13 | -13.488 | 11.898 | -0.038 | 1.00 | 0.00 |

|      |     |      |     |    |         |        |        |      |      |
|------|-----|------|-----|----|---------|--------|--------|------|------|
| ATOM | 191 | HG2  | GLN | 13 | -14.118 | 12.779 | 0.078  | 1.00 | 0.00 |
| ATOM | 192 | HG3  | GLN | 13 | -13.506 | 11.315 | 0.883  | 1.00 | 0.00 |
| ATOM | 193 | CD   | GLN | 13 | -12.056 | 12.354 | -0.298 | 1.00 | 0.00 |
| ATOM | 194 | OE1  | GLN | 13 | -11.106 | 11.680 | 0.100  | 1.00 | 0.00 |
| ATOM | 195 | NE2  | GLN | 13 | -11.844 | 13.468 | -0.943 | 1.00 | 0.00 |
| ATOM | 196 | HE21 | GLN | 13 | -10.897 | 13.774 | -1.118 | 1.00 | 0.00 |
| ATOM | 197 | HE22 | GLN | 13 | -12.627 | 14.018 | -1.264 | 1.00 | 0.00 |
| ATOM | 198 | C    | GLN | 13 | -14.019 | 8.733  | -2.130 | 1.00 | 0.00 |
| ATOM | 199 | O    | GLN | 13 | -14.689 | 7.827  | -1.639 | 1.00 | 0.00 |
| ATOM | 200 | N    | ARG | 14 | -13.873 | 8.908  | -3.441 | 1.00 | 0.00 |
| ATOM | 201 | H    | ARG | 14 | -13.316 | 9.676  | -3.788 | 1.00 | 0.00 |
| ATOM | 202 | CA   | ARG | 14 | -14.504 | 8.028  | -4.402 | 1.00 | 0.00 |
| ATOM | 203 | HA   | ARG | 14 | -15.587 | 8.064  | -4.283 | 1.00 | 0.00 |
| ATOM | 204 | CB   | ARG | 14 | -14.153 | 8.461  | -5.830 | 1.00 | 0.00 |
| ATOM | 205 | HB2  | ARG | 14 | -14.326 | 9.532  | -5.933 | 1.00 | 0.00 |
| ATOM | 206 | HB3  | ARG | 14 | -13.102 | 8.243  | -6.023 | 1.00 | 0.00 |
| ATOM | 207 | CG   | ARG | 14 | -15.025 | 7.703  | -6.837 | 1.00 | 0.00 |
| ATOM | 208 | HG2  | ARG | 14 | -14.552 | 7.731  | -7.819 | 1.00 | 0.00 |
| ATOM | 209 | HG3  | ARG | 14 | -15.132 | 6.667  | -6.515 | 1.00 | 0.00 |
| ATOM | 210 | CD   | ARG | 14 | -16.406 | 8.357  | -6.917 | 1.00 | 0.00 |
| ATOM | 211 | HD2  | ARG | 14 | -17.062 | 7.761  | -7.552 | 1.00 | 0.00 |
| ATOM | 212 | HD3  | ARG | 14 | -16.838 | 8.433  | -5.919 | 1.00 | 0.00 |

|      |     |      |     |    |         |        |        |      |      |
|------|-----|------|-----|----|---------|--------|--------|------|------|
| ATOM | 213 | NE   | ARG | 14 | -16.297 | 9.699  | -7.484 | 1.00 | 0.00 |
| ATOM | 214 | HE   | ARG | 14 | -15.502 | 9.942  | -8.057 | 1.00 | 0.00 |
| ATOM | 215 | CZ   | ARG | 14 | -17.229 | 10.625 | -7.264 | 1.00 | 0.00 |
| ATOM | 216 | NH1  | ARG | 14 | -18.274 | 10.347 | -6.532 | 1.00 | 0.00 |
| ATOM | 217 | HH11 | ARG | 14 | -18.375 | 9.425  | -6.131 | 1.00 | 0.00 |
| ATOM | 218 | HH12 | ARG | 14 | -18.976 | 11.054 | -6.370 | 1.00 | 0.00 |
| ATOM | 219 | NH2  | ARG | 14 | -17.097 | 11.816 | -7.782 | 1.00 | 0.00 |
| ATOM | 220 | HH21 | ARG | 14 | -16.288 | 12.030 | -8.347 | 1.00 | 0.00 |
| ATOM | 221 | HH22 | ARG | 14 | -17.804 | 12.517 | -7.614 | 1.00 | 0.00 |
| ATOM | 222 | C    | ARG | 14 | -14.009 | 6.622  | -4.146 | 1.00 | 0.00 |
| ATOM | 223 | O    | ARG | 14 | -14.779 | 5.661  | -4.153 | 1.00 | 0.00 |
| ATOM | 224 | N    | GLN | 15 | -12.703 | 6.524  | -3.896 | 1.00 | 0.00 |
| ATOM | 225 | H    | GLN | 15 | -12.109 | 7.340  | -3.921 | 1.00 | 0.00 |
| ATOM | 226 | CA   | GLN | 15 | -12.098 | 5.248  | -3.609 | 1.00 | 0.00 |
| ATOM | 227 | HA   | GLN | 15 | -12.481 | 4.491  | -4.293 | 1.00 | 0.00 |
| ATOM | 228 | CB   | GLN | 15 | -10.575 | 5.335  | -3.778 | 1.00 | 0.00 |
| ATOM | 229 | HB2  | GLN | 15 | -10.265 | 6.379  | -3.731 | 1.00 | 0.00 |
| ATOM | 230 | HB3  | GLN | 15 | -10.090 | 4.776  | -2.977 | 1.00 | 0.00 |
| ATOM | 231 | CG   | GLN | 15 | -10.170 | 4.743  | -5.132 | 1.00 | 0.00 |
| ATOM | 232 | HG2  | GLN | 15 | -9.135  | 4.402  | -5.091 | 1.00 | 0.00 |
| ATOM | 233 | HG3  | GLN | 15 | -10.818 | 3.904  | -5.386 | 1.00 | 0.00 |
| ATOM | 234 | CD   | GLN | 15 | -10.292 | 5.801  | -6.224 | 1.00 | 0.00 |

|      |     |      |     |    |         |       |        |      |      |
|------|-----|------|-----|----|---------|-------|--------|------|------|
| ATOM | 235 | OE1  | GLN | 15 | -9.285  | 6.327 | -6.695 | 1.00 | 0.00 |
| ATOM | 236 | NE2  | GLN | 15 | -11.475 | 6.150 | -6.653 | 1.00 | 0.00 |
| ATOM | 237 | HE21 | GLN | 15 | -11.560 | 6.850 | -7.376 | 1.00 | 0.00 |
| ATOM | 238 | HE22 | GLN | 15 | -12.299 | 5.718 | -6.260 | 1.00 | 0.00 |
| ATOM | 239 | C    | GLN | 15 | -12.450 | 4.842 | -2.187 | 1.00 | 0.00 |
| ATOM | 240 | O    | GLN | 15 | -11.628 | 4.926 | -1.273 | 1.00 | 0.00 |
| ATOM | 241 | N    | GLN | 16 | -13.681 | 4.396 | -2.022 | 1.00 | 0.00 |
| ATOM | 242 | H    | GLN | 16 | -14.319 | 4.374 | -2.804 | 1.00 | 0.00 |
| ATOM | 243 | CA   | GLN | 16 | -14.170 | 3.960 | -0.720 | 1.00 | 0.00 |
| ATOM | 244 | HA   | GLN | 16 | -13.759 | 4.592 | 0.068  | 1.00 | 0.00 |
| ATOM | 245 | CB   | GLN | 16 | -15.695 | 4.062 | -0.682 | 1.00 | 0.00 |
| ATOM | 246 | HB2  | GLN | 16 | -16.127 | 3.442 | -1.468 | 1.00 | 0.00 |
| ATOM | 247 | HB3  | GLN | 16 | -16.064 | 3.727 | 0.288  | 1.00 | 0.00 |
| ATOM | 248 | CG   | GLN | 16 | -16.097 | 5.521 | -0.904 | 1.00 | 0.00 |
| ATOM | 249 | HG2  | GLN | 16 | -15.667 | 6.139 | -0.115 | 1.00 | 0.00 |
| ATOM | 250 | HG3  | GLN | 16 | -15.728 | 5.859 | -1.872 | 1.00 | 0.00 |
| ATOM | 251 | CD   | GLN | 16 | -17.614 | 5.682 | -0.877 | 1.00 | 0.00 |
| ATOM | 252 | OE1  | GLN | 16 | -18.350 | 4.694 | -0.861 | 1.00 | 0.00 |
| ATOM | 253 | NE2  | GLN | 16 | -18.124 | 6.883 | -0.874 | 1.00 | 0.00 |
| ATOM | 254 | HE21 | GLN | 16 | -19.126 | 7.002 | -0.856 | 1.00 | 0.00 |
| ATOM | 255 | HE22 | GLN | 16 | -17.513 | 7.687 | -0.889 | 1.00 | 0.00 |
| ATOM | 256 | C    | GLN | 16 | -13.720 | 2.528 | -0.459 | 1.00 | 0.00 |

|      |     |     |     |    |         |        |        |      |      |
|------|-----|-----|-----|----|---------|--------|--------|------|------|
| ATOM | 257 | O   | GLN | 16 | -14.490 | 1.694  | 0.026  | 1.00 | 0.00 |
| ATOM | 258 | N   | MET | 17 | -12.465 | 2.253  | -0.807 | 1.00 | 0.00 |
| ATOM | 259 | H   | MET | 17 | -11.890 | 2.966  | -1.233 | 1.00 | 0.00 |
| ATOM | 260 | CA  | MET | 17 | -11.899 | 0.920  | -0.636 | 1.00 | 0.00 |
| ATOM | 261 | HA  | MET | 17 | -12.537 | 0.179  | -1.118 | 1.00 | 0.00 |
| ATOM | 262 | CB  | MET | 17 | -10.504 | 0.854  | -1.272 | 1.00 | 0.00 |
| ATOM | 263 | HB2 | MET | 17 | -10.348 | -0.145 | -1.680 | 1.00 | 0.00 |
| ATOM | 264 | HB3 | MET | 17 | -10.447 | 1.587  | -2.076 | 1.00 | 0.00 |
| ATOM | 265 | CG  | MET | 17 | -9.423  | 1.153  | -0.232 | 1.00 | 0.00 |
| ATOM | 266 | HG2 | MET | 17 | -9.753  | 1.954  | 0.429  | 1.00 | 0.00 |
| ATOM | 267 | HG3 | MET | 17 | -9.216  | 0.259  | 0.357  | 1.00 | 0.00 |
| ATOM | 268 | SD  | MET | 17 | -7.914  | 1.667  | -1.080 | 1.00 | 0.00 |
| ATOM | 269 | CE  | MET | 17 | -8.544  | 3.242  | -1.708 | 1.00 | 0.00 |
| ATOM | 270 | HE1 | MET | 17 | -8.847  | 3.872  | -0.872 | 1.00 | 0.00 |
| ATOM | 271 | HE2 | MET | 17 | -7.762  | 3.745  | -2.277 | 1.00 | 0.00 |
| ATOM | 272 | HE3 | MET | 17 | -9.402  | 3.059  | -2.354 | 1.00 | 0.00 |
| ATOM | 273 | C   | MET | 17 | -11.817 | 0.529  | 0.831  | 1.00 | 0.00 |
| ATOM | 274 | O   | MET | 17 | -11.816 | -0.653 | 1.159  | 1.00 | 0.00 |
| ATOM | 275 | N   | LEU | 18 | -11.735 | 1.530  | 1.699  | 1.00 | 0.00 |
| ATOM | 276 | H   | LEU | 18 | -11.720 | 2.484  | 1.368  | 1.00 | 0.00 |
| ATOM | 277 | CA  | LEU | 18 | -11.624 | 1.295  | 3.136  | 1.00 | 0.00 |
| ATOM | 278 | HA  | LEU | 18 | -10.726 | 0.714  | 3.349  | 1.00 | 0.00 |

|      |     |      |     |    |         |        |       |      |      |
|------|-----|------|-----|----|---------|--------|-------|------|------|
| ATOM | 279 | CB   | LEU | 18 | -11.536 | 2.617  | 3.882 | 1.00 | 0.00 |
| ATOM | 280 | HB2  | LEU | 18 | -12.457 | 3.178  | 3.726 | 1.00 | 0.00 |
| ATOM | 281 | HB3  | LEU | 18 | -11.402 | 2.428  | 4.947 | 1.00 | 0.00 |
| ATOM | 282 | CG   | LEU | 18 | -10.349 | 3.429  | 3.355 | 1.00 | 0.00 |
| ATOM | 283 | HG   | LEU | 18 | -9.493  | 2.769  | 3.212 | 1.00 | 0.00 |
| ATOM | 284 | CD1  | LEU | 18 | -10.722 | 4.078  | 2.018 | 1.00 | 0.00 |
| ATOM | 285 | HD11 | LEU | 18 | -11.577 | 4.738  | 2.161 | 1.00 | 0.00 |
| ATOM | 286 | HD12 | LEU | 18 | -9.876  | 4.655  | 1.645 | 1.00 | 0.00 |
| ATOM | 287 | HD13 | LEU | 18 | -10.978 | 3.302  | 1.296 | 1.00 | 0.00 |
| ATOM | 288 | CD2  | LEU | 18 | -9.982  | 4.517  | 4.369 | 1.00 | 0.00 |
| ATOM | 289 | HD21 | LEU | 18 | -9.711  | 4.053  | 5.318 | 1.00 | 0.00 |
| ATOM | 290 | HD22 | LEU | 18 | -9.137  | 5.094  | 3.994 | 1.00 | 0.00 |
| ATOM | 291 | HD23 | LEU | 18 | -10.835 | 5.178  | 4.519 | 1.00 | 0.00 |
| ATOM | 292 | C    | LEU | 18 | -12.810 | 0.493  | 3.654 | 1.00 | 0.00 |
| ATOM | 293 | O    | LEU | 18 | -12.703 | -0.170 | 4.677 | 1.00 | 0.00 |
| ATOM | 294 | N    | SER | 19 | -13.939 | 0.543  | 2.951 | 1.00 | 0.00 |
| ATOM | 295 | H    | SER | 19 | -14.017 | 1.112  | 2.120 | 1.00 | 0.00 |
| ATOM | 296 | CA   | SER | 19 | -15.106 | -0.221 | 3.379 | 1.00 | 0.00 |
| ATOM | 297 | HA   | SER | 19 | -15.345 | 0.015  | 4.416 | 1.00 | 0.00 |
| ATOM | 298 | CB   | SER | 19 | -16.314 | 0.127  | 2.506 | 1.00 | 0.00 |
| ATOM | 299 | HB2  | SER | 19 | -16.141 | -0.219 | 1.487 | 1.00 | 0.00 |
| ATOM | 300 | HB3  | SER | 19 | -17.206 | -0.356 | 2.906 | 1.00 | 0.00 |

|      |     |     |     |    |         |        |        |      |      |
|------|-----|-----|-----|----|---------|--------|--------|------|------|
| ATOM | 301 | OG  | SER | 19 | -16.499 | 1.537  | 2.503  | 1.00 | 0.00 |
| ATOM | 302 | HG  | SER | 19 | -17.256 | 1.759  | 1.956  | 1.00 | 0.00 |
| ATOM | 303 | C   | SER | 19 | -14.797 | -1.713 | 3.265  | 1.00 | 0.00 |
| ATOM | 304 | O   | SER | 19 | -14.911 | -2.471 | 4.236  | 1.00 | 0.00 |
| ATOM | 305 | N   | HIE | 20 | -14.364 | -2.113 | 2.071  | 1.00 | 0.00 |
| ATOM | 306 | H   | HIE | 20 | -14.289 | -1.449 | 1.314  | 1.00 | 0.00 |
| ATOM | 307 | CA  | HIE | 20 | -13.997 | -3.501 | 1.813  | 1.00 | 0.00 |
| ATOM | 308 | HA  | HIE | 20 | -14.773 | -4.167 | 2.190  | 1.00 | 0.00 |
| ATOM | 309 | CB  | HIE | 20 | -13.838 | -3.738 | 0.304  | 1.00 | 0.00 |
| ATOM | 310 | HB2 | HIE | 20 | -12.801 | -3.702 | -0.029 | 1.00 | 0.00 |
| ATOM | 311 | HB3 | HIE | 20 | -14.280 | -4.690 | 0.011  | 1.00 | 0.00 |
| ATOM | 312 | CG  | HIE | 20 | -14.573 | -2.668 | -0.458 | 1.00 | 0.00 |
| ATOM | 313 | ND1 | HIE | 20 | -13.920 | -1.779 | -1.296 | 1.00 | 0.00 |
| ATOM | 314 | CE1 | HIE | 20 | -14.845 | -0.944 | -1.802 | 1.00 | 0.00 |
| ATOM | 315 | HE1 | HIE | 20 | -14.498 | -0.173 | -2.490 | 1.00 | 0.00 |
| ATOM | 316 | NE2 | HIE | 20 | -16.068 | -1.227 | -1.348 | 1.00 | 0.00 |
| ATOM | 317 | HE2 | HIE | 20 | -16.951 | -0.779 | -1.546 | 1.00 | 0.00 |
| ATOM | 318 | CD2 | HIE | 20 | -15.899 | -2.317 | -0.500 | 1.00 | 0.00 |
| ATOM | 319 | HD2 | HIE | 20 | -16.760 | -2.752 | 0.007  | 1.00 | 0.00 |
| ATOM | 320 | C   | HIE | 20 | -12.686 | -3.800 | 2.521  | 1.00 | 0.00 |
| ATOM | 321 | O   | HIE | 20 | -12.472 | -4.895 | 3.040  | 1.00 | 0.00 |
| ATOM | 322 | N   | CYX | 21 | -11.819 | -2.794 | 2.543  | 1.00 | 0.00 |

|      |     |     |     |    |         |        |        |      |      |
|------|-----|-----|-----|----|---------|--------|--------|------|------|
| ATOM | 323 | H   | CYX | 21 | -12.042 | -1.931 | 2.069  | 1.00 | 0.00 |
| ATOM | 324 | CA  | CYX | 21 | -10.529 | -2.906 | 3.195  | 1.00 | 0.00 |
| ATOM | 325 | HA  | CYX | 21 | -9.956  | -3.733 | 2.776  | 1.00 | 0.00 |
| ATOM | 326 | CB  | CYX | 21 | -9.748  | -1.604 | 2.969  | 1.00 | 0.00 |
| ATOM | 327 | HB2 | CYX | 21 | -10.437 | -0.813 | 2.676  | 1.00 | 0.00 |
| ATOM | 328 | HB3 | CYX | 21 | -9.240  | -1.320 | 3.891  | 1.00 | 0.00 |
| ATOM | 329 | SG  | CYX | 21 | -8.552  | -1.864 | 1.634  | 1.00 | 0.00 |
| ATOM | 330 | C   | CYX | 21 | -10.731 | -3.185 | 4.684  | 1.00 | 0.00 |
| ATOM | 331 | O   | CYX | 21 | -10.118 | -4.094 | 5.246  | 1.00 | 0.00 |
| ATOM | 332 | N   | ARG | 22 | -11.631 | -2.428 | 5.305  | 1.00 | 0.00 |
| ATOM | 333 | H   | ARG | 22 | -12.107 | -1.686 | 4.813  | 1.00 | 0.00 |
| ATOM | 334 | CA  | ARG | 22 | -11.947 | -2.637 | 6.711  | 1.00 | 0.00 |
| ATOM | 335 | HA  | ARG | 22 | -11.055 | -2.485 | 7.319  | 1.00 | 0.00 |
| ATOM | 336 | CB  | ARG | 22 | -13.023 | -1.646 | 7.164  | 1.00 | 0.00 |
| ATOM | 337 | HB2 | ARG | 22 | -12.724 | -0.637 | 6.881  | 1.00 | 0.00 |
| ATOM | 338 | HB3 | ARG | 22 | -13.967 | -1.895 | 6.680  | 1.00 | 0.00 |
| ATOM | 339 | CG  | ARG | 22 | -13.195 | -1.719 | 8.684  | 1.00 | 0.00 |
| ATOM | 340 | HG2 | ARG | 22 | -13.414 | -2.746 | 8.977  | 1.00 | 0.00 |
| ATOM | 341 | HG3 | ARG | 22 | -12.276 | -1.392 | 9.171  | 1.00 | 0.00 |
| ATOM | 342 | CD  | ARG | 22 | -14.351 | -0.809 | 9.111  | 1.00 | 0.00 |
| ATOM | 343 | HD2 | ARG | 22 | -15.292 | -1.197 | 8.721  | 1.00 | 0.00 |
| ATOM | 344 | HD3 | ARG | 22 | -14.402 | -0.760 | 10.199 | 1.00 | 0.00 |



|      |     |      |     |    |         |        |       |      |      |
|------|-----|------|-----|----|---------|--------|-------|------|------|
| ATOM | 345 | NE   | ARG | 22 | -14.149 | 0.542  | 8.590 | 1.00 | 0.00 |
| ATOM | 346 | HE   | ARG | 22 | -13.527 | 1.179  | 9.068 | 1.00 | 0.00 |
| ATOM | 347 | CZ   | ARG | 22 | -14.771 | 0.966  | 7.487 | 1.00 | 0.00 |
| ATOM | 348 | NH1  | ARG | 22 | -15.600 | 0.180  | 6.852 | 1.00 | 0.00 |
| ATOM | 349 | HH11 | ARG | 22 | -15.771 | -0.754 | 7.198 | 1.00 | 0.00 |
| ATOM | 350 | HH12 | ARG | 22 | -16.065 | 0.509  | 6.019 | 1.00 | 0.00 |
| ATOM | 351 | NH2  | ARG | 22 | -14.550 | 2.171  | 7.038 | 1.00 | 0.00 |
| ATOM | 352 | HH21 | ARG | 22 | -13.908 | 2.779  | 7.527 | 1.00 | 0.00 |
| ATOM | 353 | HH22 | ARG | 22 | -15.021 | 2.490  | 6.204 | 1.00 | 0.00 |
| ATOM | 354 | C    | ARG | 22 | -12.444 | -4.063 | 6.882 | 1.00 | 0.00 |
| ATOM | 355 | O    | ARG | 22 | -12.014 | -4.790 | 7.785 | 1.00 | 0.00 |
| ATOM | 356 | N    | MET | 23 | -13.335 | -4.469 | 5.971 | 1.00 | 0.00 |
| ATOM | 357 | H    | MET | 23 | -13.671 | -3.839 | 5.258 | 1.00 | 0.00 |
| ATOM | 358 | CA   | MET | 23 | -13.859 | -5.824 | 5.996 | 1.00 | 0.00 |
| ATOM | 359 | HA   | MET | 23 | -14.409 | -5.992 | 6.922 | 1.00 | 0.00 |
| ATOM | 360 | CB   | MET | 23 | -14.809 | -6.049 | 4.813 | 1.00 | 0.00 |
| ATOM | 361 | HB2  | MET | 23 | -15.562 | -5.261 | 4.800 | 1.00 | 0.00 |
| ATOM | 362 | HB3  | MET | 23 | -14.240 | -6.023 | 3.884 | 1.00 | 0.00 |
| ATOM | 363 | CG   | MET | 23 | -15.497 | -7.409 | 4.952 | 1.00 | 0.00 |
| ATOM | 364 | HG2  | MET | 23 | -14.746 | -8.195 | 5.037 | 1.00 | 0.00 |
| ATOM | 365 | HG3  | MET | 23 | -16.128 | -7.414 | 5.841 | 1.00 | 0.00 |
| ATOM | 366 | SD   | MET | 23 | -16.522 | -7.719 | 3.492 | 1.00 | 0.00 |

|      |     |     |     |    |         |        |       |      |      |
|------|-----|-----|-----|----|---------|--------|-------|------|------|
| ATOM | 367 | CE  | MET | 23 | -15.175 | -8.044 | 2.326 | 1.00 | 0.00 |
| ATOM | 368 | HE1 | MET | 23 | -14.592 | -8.898 | 2.672 | 1.00 | 0.00 |
| ATOM | 369 | HE2 | MET | 23 | -15.590 | -8.263 | 1.342 | 1.00 | 0.00 |
| ATOM | 370 | HE3 | MET | 23 | -14.530 | -7.168 | 2.261 | 1.00 | 0.00 |
| ATOM | 371 | C   | MET | 23 | -12.694 | -6.804 | 5.927 | 1.00 | 0.00 |
| ATOM | 372 | O   | MET | 23 | -12.694 | -7.832 | 6.601 | 1.00 | 0.00 |
| ATOM | 373 | N   | TYR | 24 | -11.692 | -6.455 | 5.116 | 1.00 | 0.00 |
| ATOM | 374 | H   | TYR | 24 | -11.766 | -5.622 | 4.550 | 1.00 | 0.00 |
| ATOM | 375 | CA  | TYR | 24 | -10.501 | -7.285 | 4.973 | 1.00 | 0.00 |
| ATOM | 376 | HA  | TYR | 24 | -10.777 | -8.282 | 4.628 | 1.00 | 0.00 |
| ATOM | 377 | CB  | TYR | 24 | -9.543  | -6.654 | 3.941 | 1.00 | 0.00 |
| ATOM | 378 | HB2 | TYR | 24 | -9.535  | -7.269 | 3.041 | 1.00 | 0.00 |
| ATOM | 379 | HB3 | TYR | 24 | -9.922  | -5.661 | 3.700 | 1.00 | 0.00 |
| ATOM | 380 | CG  | TYR | 24 | -8.130  | -6.537 | 4.485 | 1.00 | 0.00 |
| ATOM | 381 | CD1 | TYR | 24 | -7.433  | -7.679 | 4.896 | 1.00 | 0.00 |
| ATOM | 382 | HD1 | TYR | 24 | -7.907  | -8.659 | 4.835 | 1.00 | 0.00 |
| ATOM | 383 | CE1 | TYR | 24 | -6.126  | -7.563 | 5.386 | 1.00 | 0.00 |
| ATOM | 384 | HE1 | TYR | 24 | -5.586  | -8.452 | 5.714 | 1.00 | 0.00 |
| ATOM | 385 | CZ  | TYR | 24 | -5.515  | -6.306 | 5.459 | 1.00 | 0.00 |
| ATOM | 386 | OH  | TYR | 24 | -4.225  | -6.192 | 5.935 | 1.00 | 0.00 |
| ATOM | 387 | HH  | TYR | 24 | -3.842  | -7.036 | 6.188 | 1.00 | 0.00 |
| ATOM | 388 | CE2 | TYR | 24 | -6.209  | -5.166 | 5.046 | 1.00 | 0.00 |

|      |     |         |    |         |        |        |      |      |
|------|-----|---------|----|---------|--------|--------|------|------|
| ATOM | 389 | HE2 TYR | 24 | -5.732  | -4.188 | 5.103  | 1.00 | 0.00 |
| ATOM | 390 | CD2 TYR | 24 | -7.516  | -5.280 | 4.559  | 1.00 | 0.00 |
| ATOM | 391 | HD2 TYR | 24 | -8.057  | -4.391 | 4.237  | 1.00 | 0.00 |
| ATOM | 392 | C TYR   | 24 | -9.825  | -7.456 | 6.331  | 1.00 | 0.00 |
| ATOM | 393 | O TYR   | 24 | -9.419  | -8.556 | 6.695  | 1.00 | 0.00 |
| ATOM | 394 | N MET   | 25 | -9.719  | -6.364 | 7.087  | 1.00 | 0.00 |
| ATOM | 395 | H MET   | 25 | -10.060 | -5.470 | 6.766  | 1.00 | 0.00 |
| ATOM | 396 | CA MET  | 25 | -9.105  | -6.436 | 8.410  | 1.00 | 0.00 |
| ATOM | 397 | HA MET  | 25 | -8.056  | -6.720 | 8.320  | 1.00 | 0.00 |
| ATOM | 398 | CB MET  | 25 | -9.185  | -5.074 | 9.101  | 1.00 | 0.00 |
| ATOM | 399 | HB2 MET | 25 | -10.231 | -4.800 | 9.235  | 1.00 | 0.00 |
| ATOM | 400 | HB3 MET | 25 | -8.699  | -5.136 | 10.075 | 1.00 | 0.00 |
| ATOM | 401 | CG MET  | 25 | -8.483  | -4.011 | 8.246  | 1.00 | 0.00 |
| ATOM | 402 | HG2 MET | 25 | -8.899  | -4.019 | 7.239  | 1.00 | 0.00 |
| ATOM | 403 | HG3 MET | 25 | -8.630  | -3.028 | 8.693  | 1.00 | 0.00 |
| ATOM | 404 | SD MET  | 25 | -6.711  | -4.366 | 8.159  | 1.00 | 0.00 |
| ATOM | 405 | CE MET  | 25 | -6.303  | -3.918 | 9.864  | 1.00 | 0.00 |
| ATOM | 406 | HE1 MET | 25 | -6.868  | -4.548 | 10.551 | 1.00 | 0.00 |
| ATOM | 407 | HE2 MET | 25 | -5.236  | -4.064 | 10.033 | 1.00 | 0.00 |
| ATOM | 408 | HE3 MET | 25 | -6.558  | -2.873 | 10.037 | 1.00 | 0.00 |
| ATOM | 409 | C MET   | 25 | -9.850  | -7.470 | 9.249  | 1.00 | 0.00 |
| ATOM | 410 | O MET   | 25 | -9.252  | -8.388 | 9.830  | 1.00 | 0.00 |

|      |     |      |     |    |         |         |        |      |      |
|------|-----|------|-----|----|---------|---------|--------|------|------|
| ATOM | 411 | N    | ARG | 26 | -11.175 | -7.336  | 9.277  | 1.00 | 0.00 |
| ATOM | 412 | H    | ARG | 26 | -11.629 | -6.568  | 8.805  | 1.00 | 0.00 |
| ATOM | 413 | CA   | ARG | 26 | -12.002 | -8.281  | 10.010 | 1.00 | 0.00 |
| ATOM | 414 | HA   | ARG | 26 | -11.726 | -8.277  | 11.065 | 1.00 | 0.00 |
| ATOM | 415 | CB   | ARG | 26 | -13.481 | -7.893  | 9.888  | 1.00 | 0.00 |
| ATOM | 416 | HB2  | ARG | 26 | -13.612 | -6.865  | 10.224 | 1.00 | 0.00 |
| ATOM | 417 | HB3  | ARG | 26 | -13.790 | -7.977  | 8.846  | 1.00 | 0.00 |
| ATOM | 418 | CG   | ARG | 26 | -14.338 | -8.825  | 10.752 | 1.00 | 0.00 |
| ATOM | 419 | HG2  | ARG | 26 | -15.390 | -8.672  | 10.512 | 1.00 | 0.00 |
| ATOM | 420 | HG3  | ARG | 26 | -14.065 | -9.860  | 10.544 | 1.00 | 0.00 |
| ATOM | 421 | CD   | ARG | 26 | -14.104 | -8.524  | 12.235 | 1.00 | 0.00 |
| ATOM | 422 | HD2  | ARG | 26 | -13.042 | -8.603  | 12.468 | 1.00 | 0.00 |
| ATOM | 423 | HD3  | ARG | 26 | -14.453 | -7.519  | 12.470 | 1.00 | 0.00 |
| ATOM | 424 | NE   | ARG | 26 | -14.836 | -9.480  | 13.063 | 1.00 | 0.00 |
| ATOM | 425 | HE   | ARG | 26 | -15.745 | -9.809  | 12.770 | 1.00 | 0.00 |
| ATOM | 426 | CZ   | ARG | 26 | -14.333 | -9.938  | 14.210 | 1.00 | 0.00 |
| ATOM | 427 | NH1  | ARG | 26 | -13.165 | -9.532  | 14.629 | 1.00 | 0.00 |
| ATOM | 428 | HH11 | ARG | 26 | -12.638 | -8.867  | 14.081 | 1.00 | 0.00 |
| ATOM | 429 | HH12 | ARG | 26 | -12.793 | -9.886  | 15.499 | 1.00 | 0.00 |
| ATOM | 430 | NH2  | ARG | 26 | -15.014 | -10.797 | 14.917 | 1.00 | 0.00 |
| ATOM | 431 | HH21 | ARG | 26 | -15.917 | -11.111 | 14.592 | 1.00 | 0.00 |
| ATOM | 432 | HH22 | ARG | 26 | -14.634 | -11.145 | 15.786 | 1.00 | 0.00 |

|      |     |      |     |    |         |         |        |      |      |
|------|-----|------|-----|----|---------|---------|--------|------|------|
| ATOM | 433 | C    | ARG | 26 | -11.768 | -9.674  | 9.440  | 1.00 | 0.00 |
| ATOM | 434 | O    | ARG | 26 | -11.659 | -10.661 | 10.175 | 1.00 | 0.00 |
| ATOM | 435 | N    | GLN | 27 | -11.651 | -9.734  | 8.118  | 1.00 | 0.00 |
| ATOM | 436 | H    | GLN | 27 | -11.775 | -8.906  | 7.553  | 1.00 | 0.00 |
| ATOM | 437 | CA   | GLN | 27 | -11.386 | -10.987 | 7.448  | 1.00 | 0.00 |
| ATOM | 438 | HA   | GLN | 27 | -12.180 | -11.699 | 7.673  | 1.00 | 0.00 |
| ATOM | 439 | CB   | GLN | 27 | -11.323 | -10.787 | 5.926  | 1.00 | 0.00 |
| ATOM | 440 | HB2  | GLN | 27 | -12.301 | -10.470 | 5.566  | 1.00 | 0.00 |
| ATOM | 441 | HB3  | GLN | 27 | -10.584 | -10.019 | 5.696  | 1.00 | 0.00 |
| ATOM | 442 | CG   | GLN | 27 | -10.926 | -12.101 | 5.238  | 1.00 | 0.00 |
| ATOM | 443 | HG2  | GLN | 27 | -11.042 | -11.995 | 4.160  | 1.00 | 0.00 |
| ATOM | 444 | HG3  | GLN | 27 | -9.890  | -12.351 | 5.469  | 1.00 | 0.00 |
| ATOM | 445 | CD   | GLN | 27 | -11.819 | -13.241 | 5.714  | 1.00 | 0.00 |
| ATOM | 446 | OE1  | GLN | 27 | -12.661 | -13.733 | 4.963  | 1.00 | 0.00 |
| ATOM | 447 | NE2  | GLN | 27 | -11.686 | -13.682 | 6.934  | 1.00 | 0.00 |
| ATOM | 448 | HE21 | GLN | 27 | -12.271 | -14.437 | 7.262  | 1.00 | 0.00 |
| ATOM | 449 | HE22 | GLN | 27 | -10.998 | -13.267 | 7.546  | 1.00 | 0.00 |
| ATOM | 450 | C    | GLN | 27 | -10.079 | -11.558 | 7.968  | 1.00 | 0.00 |
| ATOM | 451 | O    | GLN | 27 | -9.945  | -12.756 | 8.166  | 1.00 | 0.00 |
| ATOM | 452 | N    | GLN | 28 | -9.114  | -10.696 | 8.224  | 1.00 | 0.00 |
| ATOM | 453 | H    | GLN | 28 | -9.223  | -9.704  | 8.072  | 1.00 | 0.00 |
| ATOM | 454 | CA   | GLN | 28 | -7.859  | -11.172 | 8.737  | 1.00 | 0.00 |

|      |     |      |     |    |         |         |        |      |      |
|------|-----|------|-----|----|---------|---------|--------|------|------|
| ATOM | 455 | HA   | GLN | 28 | -7.395  | -11.857 | 8.027  | 1.00 | 0.00 |
| ATOM | 456 | CB   | GLN | 28 | -6.930  | -10.003 | 8.958  | 1.00 | 0.00 |
| ATOM | 457 | HB2  | GLN | 28 | -6.877  | -9.412  | 8.044  | 1.00 | 0.00 |
| ATOM | 458 | HB3  | GLN | 28 | -7.319  | -9.386  | 9.768  | 1.00 | 0.00 |
| ATOM | 459 | CG   | GLN | 28 | -5.528  | -10.502 | 9.325  | 1.00 | 0.00 |
| ATOM | 460 | HG2  | GLN | 28 | -5.288  | -11.393 | 8.745  | 1.00 | 0.00 |
| ATOM | 461 | HG3  | GLN | 28 | -4.792  | -9.725  | 9.118  | 1.00 | 0.00 |
| ATOM | 462 | CD   | GLN | 28 | -5.461  | -10.854 | 10.809 | 1.00 | 0.00 |
| ATOM | 463 | OE1  | GLN | 28 | -5.023  | -12.029 | 11.171 | 1.00 | 0.00 |
| ATOM | 464 | NE2  | GLN | 28 | -5.817  | -10.038 | 11.660 | 1.00 | 0.00 |
| ATOM | 465 | HE21 | GLN | 28 | -5.768  | -10.281 | 12.640 | 1.00 | 0.00 |
| ATOM | 466 | HE22 | GLN | 28 | -6.155  | -9.131  | 11.375 | 1.00 | 0.00 |
| ATOM | 467 | C    | GLN | 28 | -8.101  | -11.889 | 10.054 | 1.00 | 0.00 |
| ATOM | 468 | O    | GLN | 28 | -7.494  | -12.925 | 10.330 | 1.00 | 0.00 |
| ATOM | 469 | N    | MET | 29 | -9.006  | -11.333 | 10.862 | 1.00 | 0.00 |
| ATOM | 470 | H    | MET | 29 | -9.470  | -10.472 | 10.613 | 1.00 | 0.00 |
| ATOM | 471 | CA   | MET | 29 | -9.327  | -11.946 | 12.148 | 1.00 | 0.00 |
| ATOM | 472 | HA   | MET | 29 | -8.427  | -12.010 | 12.761 | 1.00 | 0.00 |
| ATOM | 473 | CB   | MET | 29 | -10.371 | -11.111 | 12.897 | 1.00 | 0.00 |
| ATOM | 474 | HB2  | MET | 29 | -11.182 | -10.851 | 12.218 | 1.00 | 0.00 |
| ATOM | 475 | HB3  | MET | 29 | -10.767 | -11.690 | 13.731 | 1.00 | 0.00 |
| ATOM | 476 | CG   | MET | 29 | -9.722  | -9.832  | 13.428 | 1.00 | 0.00 |

|      |     |         |    |         |         |        |      |      |
|------|-----|---------|----|---------|---------|--------|------|------|
| ATOM | 477 | HG2 MET | 29 | -9.342  | -9.236  | 12.599 | 1.00 | 0.00 |
| ATOM | 478 | HG3 MET | 29 | -10.453 | -9.250  | 13.989 | 1.00 | 0.00 |
| ATOM | 479 | SD MET  | 29 | -8.349  | -10.274 | 14.521 | 1.00 | 0.00 |
| ATOM | 480 | CE MET  | 29 | -9.309  | -11.225 | 15.728 | 1.00 | 0.00 |
| ATOM | 481 | HE1 MET | 29 | -9.791  | -12.065 | 15.229 | 1.00 | 0.00 |
| ATOM | 482 | HE2 MET | 29 | -8.645  | -11.599 | 16.508 | 1.00 | 0.00 |
| ATOM | 483 | HE3 MET | 29 | -10.068 | -10.584 | 16.176 | 1.00 | 0.00 |
| ATOM | 484 | C MET   | 29 | -9.858  | -13.361 | 11.943 | 1.00 | 0.00 |
| ATOM | 485 | O MET   | 29 | -9.313  | -14.317 | 12.492 | 1.00 | 0.00 |
| ATOM | 486 | N GLU   | 30 | -10.911 | -13.498 | 11.137 | 1.00 | 0.00 |
| ATOM | 487 | H GLU   | 30 | -11.357 | -12.697 | 10.715 | 1.00 | 0.00 |
| ATOM | 488 | CA GLU  | 30 | -11.469 | -14.825 | 10.869 | 1.00 | 0.00 |
| ATOM | 489 | HA GLU  | 30 | -11.676 | -15.335 | 11.810 | 1.00 | 0.00 |
| ATOM | 490 | CB GLU  | 30 | -12.775 | -14.710 | 10.076 | 1.00 | 0.00 |
| ATOM | 491 | HB2 GLU | 30 | -12.609 | -14.092 | 9.194  | 1.00 | 0.00 |
| ATOM | 492 | HB3 GLU | 30 | -13.098 | -15.704 | 9.767  | 1.00 | 0.00 |
| ATOM | 493 | CG GLU  | 30 | -13.857 | -14.071 | 10.951 | 1.00 | 0.00 |
| ATOM | 494 | HG2 GLU | 30 | -14.838 | -14.422 | 10.632 | 1.00 | 0.00 |
| ATOM | 495 | HG3 GLU | 30 | -13.687 | -14.362 | 11.988 | 1.00 | 0.00 |
| ATOM | 496 | CD GLU  | 30 | -13.798 | -12.552 | 10.834 | 1.00 | 0.00 |
| ATOM | 497 | OE1 GLU | 30 | -13.939 | -12.057 | 9.727  | 1.00 | 0.00 |
| ATOM | 498 | OE2 GLU | 30 | -13.621 | -11.905 | 11.854 | 1.00 | 0.00 |

|      |     |     |     |    |         |         |        |      |      |
|------|-----|-----|-----|----|---------|---------|--------|------|------|
| ATOM | 499 | C   | GLU | 30 | -10.470 | -15.677 | 10.087 | 1.00 | 0.00 |
| ATOM | 500 | O   | GLU | 30 | -10.287 | -16.862 | 10.364 | 1.00 | 0.00 |
| ATOM | 501 | N   | GLU | 31 | -9.836  | -15.047 | 9.100  | 1.00 | 0.00 |
| ATOM | 502 | H   | GLU | 31 | -10.057 | -14.081 | 8.909  | 1.00 | 0.00 |
| ATOM | 503 | CA  | GLU | 31 | -8.854  | -15.715 | 8.248  | 1.00 | 0.00 |
| ATOM | 504 | HA  | GLU | 31 | -9.264  | -16.647 | 7.858  | 1.00 | 0.00 |
| ATOM | 505 | CB  | GLU | 31 | -8.494  | -14.806 | 7.067  | 1.00 | 0.00 |
| ATOM | 506 | HB2 | GLU | 31 | -9.402  | -14.345 | 6.680  | 1.00 | 0.00 |
| ATOM | 507 | HB3 | GLU | 31 | -7.810  | -14.029 | 7.408  | 1.00 | 0.00 |
| ATOM | 508 | CG  | GLU | 31 | -7.823  | -15.626 | 5.957  | 1.00 | 0.00 |
| ATOM | 509 | HG2 | GLU | 31 | -6.965  | -16.152 | 6.375  | 1.00 | 0.00 |
| ATOM | 510 | HG3 | GLU | 31 | -8.540  | -16.351 | 5.571  | 1.00 | 0.00 |
| ATOM | 511 | CD  | GLU | 31 | -7.357  | -14.714 | 4.819  | 1.00 | 0.00 |
| ATOM | 512 | OE1 | GLU | 31 | -7.498  | -13.506 | 4.945  | 1.00 | 0.00 |
| ATOM | 513 | OE2 | GLU | 31 | -6.863  | -15.240 | 3.834  | 1.00 | 0.00 |
| ATOM | 514 | C   | GLU | 31 | -7.589  | -16.079 | 9.033  | 1.00 | 0.00 |
| ATOM | 515 | O   | GLU | 31 | -6.683  | -16.705 | 8.491  | 1.00 | 0.00 |
| ATOM | 516 | N   | SER | 32 | -7.528  | -15.673 | 10.303 | 1.00 | 0.00 |
| ATOM | 517 | H   | SER | 32 | -8.288  | -15.140 | 10.701 | 1.00 | 0.00 |
| ATOM | 518 | CA  | SER | 32 | -6.360  | -15.952 | 11.145 | 1.00 | 0.00 |
| ATOM | 519 | HA  | SER | 32 | -5.533  | -15.300 | 10.864 | 1.00 | 0.00 |
| ATOM | 520 | CB  | SER | 32 | -6.701  | -15.703 | 12.614 | 1.00 | 0.00 |



|      |     |      |     |    |        |         |        |      |      |
|------|-----|------|-----|----|--------|---------|--------|------|------|
| ATOM | 521 | HB2  | SER | 32 | -5.817 | -15.878 | 13.228 | 1.00 | 0.00 |
| ATOM | 522 | HB3  | SER | 32 | -7.033 | -14.673 | 12.742 | 1.00 | 0.00 |
| ATOM | 523 | OG   | SER | 32 | -7.739 | -16.589 | 13.014 | 1.00 | 0.00 |
| ATOM | 524 | HG   | SER | 32 | -7.954 | -16.434 | 13.937 | 1.00 | 0.00 |
| ATOM | 525 | C    | SER | 32 | -5.891 | -17.393 | 10.964 | 1.00 | 0.00 |
| ATOM | 526 | O    | SER | 32 | -4.733 | -17.715 | 11.229 | 1.00 | 0.00 |
| ATOM | 527 | N    | THR | 33 | -6.799 | -18.251 | 10.512 | 1.00 | 0.00 |
| ATOM | 528 | H    | THR | 33 | -7.748 | -17.947 | 10.350 | 1.00 | 0.00 |
| ATOM | 529 | CA   | THR | 33 | -6.471 | -19.649 | 10.269 | 1.00 | 0.00 |
| ATOM | 530 | HA   | THR | 33 | -5.839 | -20.034 | 11.070 | 1.00 | 0.00 |
| ATOM | 531 | CB   | THR | 33 | -7.758 | -20.480 | 10.219 | 1.00 | 0.00 |
| ATOM | 532 | HB   | THR | 33 | -7.514 | -21.511 | 9.960  | 1.00 | 0.00 |
| ATOM | 533 | CG2  | THR | 33 | -8.446 | -20.447 | 11.586 | 1.00 | 0.00 |
| ATOM | 534 | HG21 | THR | 33 | -8.691 | -19.417 | 11.846 | 1.00 | 0.00 |
| ATOM | 535 | HG22 | THR | 33 | -9.360 | -21.039 | 11.548 | 1.00 | 0.00 |
| ATOM | 536 | HG23 | THR | 33 | -7.777 | -20.862 | 12.340 | 1.00 | 0.00 |
| ATOM | 537 | OG1  | THR | 33 | -8.632 | -19.940 | 9.236  | 1.00 | 0.00 |
| ATOM | 538 | HG1  | THR | 33 | -9.438 | -20.460 | 9.205  | 1.00 | 0.00 |
| ATOM | 539 | C    | THR | 33 | -5.694 | -19.823 | 8.952  | 1.00 | 0.00 |
| ATOM | 540 | O    | THR | 33 | -4.587 | -20.361 | 8.937  | 1.00 | 0.00 |
| ATOM | 541 | N    | TYR | 34 | -6.323 | -19.402 | 7.845  | 1.00 | 0.00 |
| ATOM | 542 | H    | TYR | 34 | -7.245 | -18.999 | 7.929  | 1.00 | 0.00 |

|      |     |     |     |    |         |         |       |      |      |
|------|-----|-----|-----|----|---------|---------|-------|------|------|
| ATOM | 543 | CA  | TYR | 34 | -5.743  | -19.545 | 6.498 | 1.00 | 0.00 |
| ATOM | 544 | HA  | TYR | 34 | -4.956  | -20.300 | 6.501 | 1.00 | 0.00 |
| ATOM | 545 | CB  | TYR | 34 | -6.838  | -19.983 | 5.521 | 1.00 | 0.00 |
| ATOM | 546 | HB2 | TYR | 34 | -7.607  | -19.213 | 5.465 | 1.00 | 0.00 |
| ATOM | 547 | HB3 | TYR | 34 | -6.401  | -20.132 | 4.534 | 1.00 | 0.00 |
| ATOM | 548 | CG  | TYR | 34 | -7.455  | -21.277 | 5.999 | 1.00 | 0.00 |
| ATOM | 549 | CD1 | TYR | 34 | -6.777  | -22.488 | 5.812 | 1.00 | 0.00 |
| ATOM | 550 | HD1 | TYR | 34 | -5.804  | -22.498 | 5.320 | 1.00 | 0.00 |
| ATOM | 551 | CE1 | TYR | 34 | -7.348  | -23.686 | 6.257 | 1.00 | 0.00 |
| ATOM | 552 | HE1 | TYR | 34 | -6.820  | -24.629 | 6.111 | 1.00 | 0.00 |
| ATOM | 553 | CZ  | TYR | 34 | -8.597  | -23.674 | 6.890 | 1.00 | 0.00 |
| ATOM | 554 | OH  | TYR | 34 | -9.159  | -24.855 | 7.328 | 1.00 | 0.00 |
| ATOM | 555 | HH  | TYR | 34 | -8.609  | -25.622 | 7.148 | 1.00 | 0.00 |
| ATOM | 556 | CE2 | TYR | 34 | -9.274  | -22.463 | 7.077 | 1.00 | 0.00 |
| ATOM | 557 | HE2 | TYR | 34 | -10.246 | -22.454 | 7.570 | 1.00 | 0.00 |
| ATOM | 558 | CD2 | TYR | 34 | -8.704  | -21.266 | 6.633 | 1.00 | 0.00 |
| ATOM | 559 | HD2 | TYR | 34 | -9.231  | -20.324 | 6.780 | 1.00 | 0.00 |
| ATOM | 560 | C   | TYR | 34 | -5.078  | -18.267 | 5.957 | 1.00 | 0.00 |
| ATOM | 561 | O   | TYR | 34 | -4.694  | -18.235 | 4.787 | 1.00 | 0.00 |
| ATOM | 562 | N   | GLN | 35 | -4.988  | -17.213 | 6.771 | 1.00 | 0.00 |
| ATOM | 563 | H   | GLN | 35 | -5.343  | -17.269 | 7.715 | 1.00 | 0.00 |
| ATOM | 564 | CA  | GLN | 35 | -4.408  | -15.933 | 6.316 | 1.00 | 0.00 |

|      |     |      |     |    |        |         |       |      |      |
|------|-----|------|-----|----|--------|---------|-------|------|------|
| ATOM | 565 | HA   | GLN | 35 | -5.178 | -15.348 | 5.815 | 1.00 | 0.00 |
| ATOM | 566 | CB   | GLN | 35 | -3.856 | -15.114 | 7.489 | 1.00 | 0.00 |
| ATOM | 567 | HB2  | GLN | 35 | -3.651 | -14.100 | 7.147 | 1.00 | 0.00 |
| ATOM | 568 | HB3  | GLN | 35 | -4.602 | -15.086 | 8.284 | 1.00 | 0.00 |
| ATOM | 569 | CG   | GLN | 35 | -2.561 | -15.744 | 8.025 | 1.00 | 0.00 |
| ATOM | 570 | HG2  | GLN | 35 | -1.841 | -15.872 | 7.216 | 1.00 | 0.00 |
| ATOM | 571 | HG3  | GLN | 35 | -2.131 | -15.103 | 8.795 | 1.00 | 0.00 |
| ATOM | 572 | CD   | GLN | 35 | -2.853 | -17.107 | 8.635 | 1.00 | 0.00 |
| ATOM | 573 | OE1  | GLN | 35 | -4.056 | -17.365 | 9.052 | 1.00 | 0.00 |
| ATOM | 574 | NE2  | GLN | 35 | -1.967 | -17.955 | 8.728 | 1.00 | 0.00 |
| ATOM | 575 | HE21 | GLN | 35 | -2.175 | -18.856 | 9.135 | 1.00 | 0.00 |
| ATOM | 576 | HE22 | GLN | 35 | -1.036 | -17.747 | 8.397 | 1.00 | 0.00 |
| ATOM | 577 | C    | GLN | 35 | -3.284 | -16.116 | 5.307 | 1.00 | 0.00 |
| ATOM | 578 | O    | GLN | 35 | -3.092 | -15.260 | 4.442 | 1.00 | 0.00 |
| ATOM | 579 | N    | THR | 36 | -2.536 | -17.210 | 5.409 | 1.00 | 0.00 |
| ATOM | 580 | H    | THR | 36 | -2.691 | -17.903 | 6.127 | 1.00 | 0.00 |
| ATOM | 581 | CA   | THR | 36 | -1.446 | -17.420 | 4.474 | 1.00 | 0.00 |
| ATOM | 582 | HA   | THR | 36 | -0.723 | -16.608 | 4.553 | 1.00 | 0.00 |
| ATOM | 583 | CB   | THR | 36 | -0.734 | -18.741 | 4.784 | 1.00 | 0.00 |
| ATOM | 584 | HB   | THR | 36 | -1.410 | -19.572 | 4.582 | 1.00 | 0.00 |
| ATOM | 585 | CG2  | THR | 36 | 0.514  | -18.874 | 3.907 | 1.00 | 0.00 |
| ATOM | 586 | HG21 | THR | 36 | 1.191  | -18.044 | 4.109 | 1.00 | 0.00 |

|      |     |      |     |    |        |         |        |      |      |
|------|-----|------|-----|----|--------|---------|--------|------|------|
| ATOM | 587 | HG22 | THR | 36 | 1.018  | -19.815 | 4.131  | 1.00 | 0.00 |
| ATOM | 588 | HG23 | THR | 36 | 0.224  | -18.859 | 2.857  | 1.00 | 0.00 |
| ATOM | 589 | OG1  | THR | 36 | -0.356 | -18.761 | 6.153  | 1.00 | 0.00 |
| ATOM | 590 | HG1  | THR | 36 | 0.091  | -19.588 | 6.350  | 1.00 | 0.00 |
| ATOM | 591 | C    | THR | 36 | -2.008 | -17.449 | 3.059  | 1.00 | 0.00 |
| ATOM | 592 | O    | THR | 36 | -2.668 | -18.406 | 2.655  | 1.00 | 0.00 |
| ATOM | 593 | N    | MET | 37 | -1.748 | -16.373 | 2.325  | 1.00 | 0.00 |
| ATOM | 594 | H    | MET | 37 | -1.219 | -15.608 | 2.719  | 1.00 | 0.00 |
| ATOM | 595 | CA   | MET | 37 | -2.235 | -16.244 | 0.955  | 1.00 | 0.00 |
| ATOM | 596 | HA   | MET | 37 | -3.321 | -16.328 | 0.933  | 1.00 | 0.00 |
| ATOM | 597 | CB   | MET | 37 | -1.838 | -14.876 | 0.393  | 1.00 | 0.00 |
| ATOM | 598 | HB2  | MET | 37 | -0.761 | -14.740 | 0.498  | 1.00 | 0.00 |
| ATOM | 599 | HB3  | MET | 37 | -2.109 | -14.825 | -0.661 | 1.00 | 0.00 |
| ATOM | 600 | CG   | MET | 37 | -2.570 | -13.771 | 1.162  | 1.00 | 0.00 |
| ATOM | 601 | HG2  | MET | 37 | -2.557 | -13.995 | 2.229  | 1.00 | 0.00 |
| ATOM | 602 | HG3  | MET | 37 | -2.079 | -12.814 | 0.987  | 1.00 | 0.00 |
| ATOM | 603 | SD   | MET | 37 | -4.287 | -13.673 | 0.594  | 1.00 | 0.00 |
| ATOM | 604 | CE   | MET | 37 | -4.007 | -12.544 | -0.792 | 1.00 | 0.00 |
| ATOM | 605 | HE1  | MET | 37 | -3.311 | -12.999 | -1.497 | 1.00 | 0.00 |
| ATOM | 606 | HE2  | MET | 37 | -4.953 | -12.343 | -1.294 | 1.00 | 0.00 |
| ATOM | 607 | HE3  | MET | 37 | -3.588 | -11.609 | -0.420 | 1.00 | 0.00 |
| ATOM | 608 | C    | MET | 37 | -1.671 | -17.349 | 0.062  | 1.00 | 0.00 |

|      |     |     |     |    |        |         |        |      |      |
|------|-----|-----|-----|----|--------|---------|--------|------|------|
| ATOM | 609 | O   | MET | 37 | -0.465 | -17.405 | -0.179 | 1.00 | 0.00 |
| ATOM | 610 | N   | PRO | 38 | -2.519 | -18.216 | -0.440 | 1.00 | 0.00 |
| ATOM | 611 | CD  | PRO | 38 | -3.976 | -18.234 | -0.212 | 1.00 | 0.00 |
| ATOM | 612 | HD2 | PRO | 38 | -4.413 | -17.332 | -0.638 | 1.00 | 0.00 |
| ATOM | 613 | HD3 | PRO | 38 | -4.167 | -18.259 | 0.861  | 1.00 | 0.00 |
| ATOM | 614 | CG  | PRO | 38 | -4.450 | -19.510 | -0.920 | 1.00 | 0.00 |
| ATOM | 615 | HG2 | PRO | 38 | -4.958 | -19.235 | -1.844 | 1.00 | 0.00 |
| ATOM | 616 | HG3 | PRO | 38 | -5.144 | -20.041 | -0.268 | 1.00 | 0.00 |
| ATOM | 617 | CB  | PRO | 38 | -3.235 | -20.336 | -1.190 | 1.00 | 0.00 |
| ATOM | 618 | HB2 | PRO | 38 | -3.386 | -20.863 | -2.132 | 1.00 | 0.00 |
| ATOM | 619 | HB3 | PRO | 38 | -2.996 | -21.056 | -0.407 | 1.00 | 0.00 |
| ATOM | 620 | CA  | PRO | 38 | -2.099 | -19.328 | -1.335 | 1.00 | 0.00 |
| ATOM | 621 | HA  | PRO | 38 | -1.139 | -19.709 | -0.986 | 1.00 | 0.00 |
| ATOM | 622 | C   | PRO | 38 | -1.965 | -18.862 | -2.782 | 1.00 | 0.00 |
| ATOM | 623 | O   | PRO | 38 | -2.731 | -18.013 | -3.240 | 1.00 | 0.00 |
| ATOM | 624 | N   | ARG | 39 | -0.995 | -19.422 | -3.498 | 1.00 | 0.00 |
| ATOM | 625 | H   | ARG | 39 | -0.399 | -20.133 | -3.098 | 1.00 | 0.00 |
| ATOM | 626 | CA  | ARG | 39 | -0.786 | -19.048 | -4.894 | 1.00 | 0.00 |
| ATOM | 627 | HA  | ARG | 39 | -0.567 | -17.983 | -4.961 | 1.00 | 0.00 |
| ATOM | 628 | CB  | ARG | 39 | 0.384  | -19.824 | -5.487 | 1.00 | 0.00 |
| ATOM | 629 | HB2 | ARG | 39 | 0.118  | -20.879 | -5.555 | 1.00 | 0.00 |
| ATOM | 630 | HB3 | ARG | 39 | 0.603  | -19.440 | -6.483 | 1.00 | 0.00 |

|      |     |      |     |    |        |         |        |      |      |
|------|-----|------|-----|----|--------|---------|--------|------|------|
| ATOM | 631 | CG   | ARG | 39 | 1.621  | -19.667 | -4.597 | 1.00 | 0.00 |
| ATOM | 632 | HG2  | ARG | 39 | 1.842  | -18.608 | -4.466 | 1.00 | 0.00 |
| ATOM | 633 | HG3  | ARG | 39 | 1.429  | -20.121 | -3.624 | 1.00 | 0.00 |
| ATOM | 634 | CD   | ARG | 39 | 2.817  | -20.360 | -5.255 | 1.00 | 0.00 |
| ATOM | 635 | HD2  | ARG | 39 | 2.550  | -21.382 | -5.525 | 1.00 | 0.00 |
| ATOM | 636 | HD3  | ARG | 39 | 3.115  | -19.814 | -6.150 | 1.00 | 0.00 |
| ATOM | 637 | NE   | ARG | 39 | 3.949  | -20.401 | -4.334 | 1.00 | 0.00 |
| ATOM | 638 | HE   | ARG | 39 | 4.713  | -19.749 | -4.441 | 1.00 | 0.00 |
| ATOM | 639 | CZ   | ARG | 39 | 4.005  | -21.288 | -3.340 | 1.00 | 0.00 |
| ATOM | 640 | NH1  | ARG | 39 | 3.035  | -22.145 | -3.169 | 1.00 | 0.00 |
| ATOM | 641 | HH11 | ARG | 39 | 2.241  | -22.135 | -3.792 | 1.00 | 0.00 |
| ATOM | 642 | HH12 | ARG | 39 | 3.084  | -22.814 | -2.414 | 1.00 | 0.00 |
| ATOM | 643 | NH2  | ARG | 39 | 5.033  | -21.298 | -2.536 | 1.00 | 0.00 |
| ATOM | 644 | HH21 | ARG | 39 | 5.782  | -20.634 | -2.670 | 1.00 | 0.00 |
| ATOM | 645 | HH22 | ARG | 39 | 5.075  | -21.970 | -1.783 | 1.00 | 0.00 |
| ATOM | 646 | C    | ARG | 39 | -2.018 | -19.389 | -5.708 | 1.00 | 0.00 |
| ATOM | 647 | O    | ARG | 39 | -2.420 | -18.638 | -6.597 | 1.00 | 0.00 |
| ATOM | 648 | N    | ARG | 40 | -2.608 | -20.543 | -5.401 | 1.00 | 0.00 |
| ATOM | 649 | H    | ARG | 40 | -2.230 | -21.143 | -4.681 | 1.00 | 0.00 |
| ATOM | 650 | CA   | ARG | 40 | -3.785 | -20.989 | -6.118 | 1.00 | 0.00 |
| ATOM | 651 | HA   | ARG | 40 | -3.616 | -20.913 | -7.192 | 1.00 | 0.00 |
| ATOM | 652 | CB   | ARG | 40 | -4.096 | -22.447 | -5.775 | 1.00 | 0.00 |

|      |     |      |     |    |        |         |        |      |      |
|------|-----|------|-----|----|--------|---------|--------|------|------|
| ATOM | 653 | HB2  | ARG | 40 | -4.114 | -22.570 | -4.692 | 1.00 | 0.00 |
| ATOM | 654 | HB3  | ARG | 40 | -5.067 | -22.719 | -6.187 | 1.00 | 0.00 |
| ATOM | 655 | CG   | ARG | 40 | -3.017 | -23.353 | -6.373 | 1.00 | 0.00 |
| ATOM | 656 | HG2  | ARG | 40 | -2.035 | -22.926 | -6.170 | 1.00 | 0.00 |
| ATOM | 657 | HG3  | ARG | 40 | -3.083 | -24.341 | -5.917 | 1.00 | 0.00 |
| ATOM | 658 | CD   | ARG | 40 | -3.218 | -23.475 | -7.888 | 1.00 | 0.00 |
| ATOM | 659 | HD2  | ARG | 40 | -3.204 | -22.485 | -8.343 | 1.00 | 0.00 |
| ATOM | 660 | HD3  | ARG | 40 | -2.422 | -24.083 | -8.318 | 1.00 | 0.00 |
| ATOM | 661 | NE   | ARG | 40 | -4.501 | -24.108 | -8.182 | 1.00 | 0.00 |
| ATOM | 662 | HE   | ARG | 40 | -5.294 | -23.542 | -8.445 | 1.00 | 0.00 |
| ATOM | 663 | CZ   | ARG | 40 | -4.658 | -25.429 | -8.112 | 1.00 | 0.00 |
| ATOM | 664 | NH1  | ARG | 40 | -3.656 | -26.194 | -7.770 | 1.00 | 0.00 |
| ATOM | 665 | HH11 | ARG | 40 | -2.759 | -25.782 | -7.558 | 1.00 | 0.00 |
| ATOM | 666 | HH12 | ARG | 40 | -3.783 | -27.195 | -7.719 | 1.00 | 0.00 |
| ATOM | 667 | NH2  | ARG | 40 | -5.818 | -25.961 | -8.386 | 1.00 | 0.00 |
| ATOM | 668 | HH21 | ARG | 40 | -6.592 | -25.369 | -8.650 | 1.00 | 0.00 |
| ATOM | 669 | HH22 | ARG | 40 | -5.936 | -26.963 | -8.332 | 1.00 | 0.00 |
| ATOM | 670 | C    | ARG | 40 | -4.970 | -20.111 | -5.777 | 1.00 | 0.00 |
| ATOM | 671 | O    | ARG | 40 | -5.616 | -20.274 | -4.740 | 1.00 | 0.00 |
| ATOM | 672 | N    | GLY | 41 | -5.239 | -19.187 | -6.678 | 1.00 | 0.00 |
| ATOM | 673 | H    | GLY | 41 | -4.664 | -19.111 | -7.505 | 1.00 | 0.00 |
| ATOM | 674 | CA   | GLY | 41 | -6.355 | -18.256 | -6.521 | 1.00 | 0.00 |

|      |     |     |     |    |        |         |        |      |      |
|------|-----|-----|-----|----|--------|---------|--------|------|------|
| ATOM | 675 | HA2 | GLY | 41 | -6.292 | -17.495 | -7.298 | 1.00 | 0.00 |
| ATOM | 676 | HA3 | GLY | 41 | -7.290 | -18.805 | -6.626 | 1.00 | 0.00 |
| ATOM | 677 | C   | GLY | 41 | -6.329 | -17.575 | -5.155 | 1.00 | 0.00 |
| ATOM | 678 | O   | GLY | 41 | -6.985 | -18.027 | -4.215 | 1.00 | 0.00 |
| ATOM | 679 | N   | MET | 42 | -5.573 | -16.482 | -5.055 | 1.00 | 0.00 |
| ATOM | 680 | H   | MET | 42 | -5.040 | -16.157 | -5.849 | 1.00 | 0.00 |
| ATOM | 681 | CA  | MET | 42 | -5.470 | -15.738 | -3.799 | 1.00 | 0.00 |
| ATOM | 682 | HA  | MET | 42 | -5.024 | -16.366 | -3.027 | 1.00 | 0.00 |
| ATOM | 683 | CB  | MET | 42 | -4.585 | -14.503 | -3.997 | 1.00 | 0.00 |
| ATOM | 684 | HB2 | MET | 42 | -4.959 | -13.920 | -4.838 | 1.00 | 0.00 |
| ATOM | 685 | HB3 | MET | 42 | -4.607 | -13.893 | -3.094 | 1.00 | 0.00 |
| ATOM | 686 | CG  | MET | 42 | -3.146 | -14.941 | -4.281 | 1.00 | 0.00 |
| ATOM | 687 | HG2 | MET | 42 | -2.788 | -15.580 | -3.473 | 1.00 | 0.00 |
| ATOM | 688 | HG3 | MET | 42 | -3.106 | -15.490 | -5.222 | 1.00 | 0.00 |
| ATOM | 689 | SD  | MET | 42 | -2.084 | -13.481 | -4.399 | 1.00 | 0.00 |
| ATOM | 690 | CE  | MET | 42 | -0.557 | -14.344 | -4.846 | 1.00 | 0.00 |
| ATOM | 691 | HE1 | MET | 42 | -0.705 | -14.886 | -5.780 | 1.00 | 0.00 |
| ATOM | 692 | HE2 | MET | 42 | 0.248  | -13.619 | -4.971 | 1.00 | 0.00 |
| ATOM | 693 | HE3 | MET | 42 | -0.292 | -15.048 | -4.056 | 1.00 | 0.00 |
| ATOM | 694 | C   | MET | 42 | -6.853 | -15.304 | -3.314 | 1.00 | 0.00 |
| ATOM | 695 | O   | MET | 42 | -7.846 | -15.450 | -4.028 | 1.00 | 0.00 |
| ATOM | 696 | N   | GLU | 43 | -6.911 | -14.772 | -2.094 | 1.00 | 0.00 |



|      |     |     |     |    |         |         |        |      |      |
|------|-----|-----|-----|----|---------|---------|--------|------|------|
| ATOM | 697 | H   | GLU | 43 | -6.077  | -14.685 | -1.530 | 1.00 | 0.00 |
| ATOM | 698 | CA  | GLU | 43 | -8.181  | -14.327 | -1.526 | 1.00 | 0.00 |
| ATOM | 699 | HA  | GLU | 43 | -8.929  | -15.114 | -1.622 | 1.00 | 0.00 |
| ATOM | 700 | CB  | GLU | 43 | -8.004  | -13.999 | -0.039 | 1.00 | 0.00 |
| ATOM | 701 | HB2 | GLU | 43 | -7.407  | -14.778 | 0.436  | 1.00 | 0.00 |
| ATOM | 702 | HB3 | GLU | 43 | -7.496  | -13.040 | 0.064  | 1.00 | 0.00 |
| ATOM | 703 | CG  | GLU | 43 | -9.377  | -13.925 | 0.637  | 1.00 | 0.00 |
| ATOM | 704 | HG2 | GLU | 43 | -9.959  | -13.119 | 0.192  | 1.00 | 0.00 |
| ATOM | 705 | HG3 | GLU | 43 | -9.894  | -14.873 | 0.485  | 1.00 | 0.00 |
| ATOM | 706 | CD  | GLU | 43 | -9.215  | -13.669 | 2.134  | 1.00 | 0.00 |
| ATOM | 707 | OE1 | GLU | 43 | -8.692  | -12.625 | 2.484  | 1.00 | 0.00 |
| ATOM | 708 | OE2 | GLU | 43 | -9.625  | -14.518 | 2.909  | 1.00 | 0.00 |
| ATOM | 709 | C   | GLU | 43 | -8.697  | -13.093 | -2.269 | 1.00 | 0.00 |
| ATOM | 710 | O   | GLU | 43 | -7.973  | -12.110 | -2.429 | 1.00 | 0.00 |
| ATOM | 711 | N   | PRO | 44 | -9.927  | -13.134 | -2.728 | 1.00 | 0.00 |
| ATOM | 712 | CD  | PRO | 44 | -10.859 | -14.264 | -2.578 | 1.00 | 0.00 |
| ATOM | 713 | HD2 | PRO | 44 | -10.851 | -14.600 | -1.541 | 1.00 | 0.00 |
| ATOM | 714 | HD3 | PRO | 44 | -10.539 | -15.081 | -3.226 | 1.00 | 0.00 |
| ATOM | 715 | CG  | PRO | 44 | -12.207 | -13.683 | -2.996 | 1.00 | 0.00 |
| ATOM | 716 | HG2 | PRO | 44 | -12.744 | -13.351 | -2.108 | 1.00 | 0.00 |
| ATOM | 717 | HG3 | PRO | 44 | -12.787 | -14.454 | -3.504 | 1.00 | 0.00 |
| ATOM | 718 | CB  | PRO | 44 | -11.915 | -12.544 | -3.914 | 1.00 | 0.00 |

|      |     |         |    |         |         |        |      |      |
|------|-----|---------|----|---------|---------|--------|------|------|
| ATOM | 719 | HB2 PRO | 44 | -12.677 | -11.775 | -3.787 | 1.00 | 0.00 |
| ATOM | 720 | HB3 PRO | 44 | -11.877 | -12.850 | -4.959 | 1.00 | 0.00 |
| ATOM | 721 | CA PRO  | 44 | -10.549 | -12.000 | -3.479 | 1.00 | 0.00 |
| ATOM | 722 | HA PRO  | 44 | -9.912  | -11.775 | -4.334 | 1.00 | 0.00 |
| ATOM | 723 | C PRO   | 44 | -10.711 | -10.747 | -2.621 | 1.00 | 0.00 |
| ATOM | 724 | O PRO   | 44 | -10.763 | -9.633  | -3.146 | 1.00 | 0.00 |
| ATOM | 725 | N HIE   | 45 | -10.795 | -10.934 | -1.306 | 1.00 | 0.00 |
| ATOM | 726 | H HIE   | 45 | -10.767 | -11.865 | -0.916 | 1.00 | 0.00 |
| ATOM | 727 | CA HIE  | 45 | -10.957 | -9.805  | -0.393 | 1.00 | 0.00 |
| ATOM | 728 | HA HIE  | 45 | -11.930 | -9.340  | -0.546 | 1.00 | 0.00 |
| ATOM | 729 | CB HIE  | 45 | -10.866 | -10.283 | 1.059  | 1.00 | 0.00 |
| ATOM | 730 | HB2 HIE | 45 | -9.948  | -10.837 | 1.256  | 1.00 | 0.00 |
| ATOM | 731 | HB3 HIE | 45 | -10.951 | -9.459  | 1.767  | 1.00 | 0.00 |
| ATOM | 732 | CG HIE  | 45 | -12.006 | -11.221 | 1.351  | 1.00 | 0.00 |
| ATOM | 733 | ND1 HIE | 45 | -11.800 | -12.531 | 1.753  | 1.00 | 0.00 |
| ATOM | 734 | CE1 HIE | 45 | -13.008 | -13.097 | 1.926  | 1.00 | 0.00 |
| ATOM | 735 | HE1 HIE | 45 | -13.030 | -14.139 | 2.245  | 1.00 | 0.00 |
| ATOM | 736 | NE2 HIE | 45 | -13.998 | -12.240 | 1.664  | 1.00 | 0.00 |
| ATOM | 737 | HE2 HIE | 45 | -14.998 | -12.376 | 1.706  | 1.00 | 0.00 |
| ATOM | 738 | CD2 HIE | 45 | -13.368 | -11.055 | 1.301  | 1.00 | 0.00 |
| ATOM | 739 | HD2 HIE | 45 | -13.962 | -10.182 | 1.034  | 1.00 | 0.00 |
| ATOM | 740 | C HIE   | 45 | -9.885  | -8.749  | -0.652 | 1.00 | 0.00 |

|      |     |     |     |    |         |         |        |      |      |
|------|-----|-----|-----|----|---------|---------|--------|------|------|
| ATOM | 741 | O   | HIE | 45 | -10.183 | -7.555  | -0.723 | 1.00 | 0.00 |
| ATOM | 742 | N   | MET | 46 | -8.641  | -9.198  | -0.803 | 1.00 | 0.00 |
| ATOM | 743 | H   | MET | 46 | -8.438  | -10.185 | -0.735 | 1.00 | 0.00 |
| ATOM | 744 | CA  | MET | 46 | -7.536  | -8.281  | -1.065 | 1.00 | 0.00 |
| ATOM | 745 | HA  | MET | 46 | -7.507  | -7.504  | -0.301 | 1.00 | 0.00 |
| ATOM | 746 | CB  | MET | 46 | -6.205  | -9.041  | -1.040 | 1.00 | 0.00 |
| ATOM | 747 | HB2 | MET | 46 | -6.178  | -9.741  | -1.875 | 1.00 | 0.00 |
| ATOM | 748 | HB3 | MET | 46 | -5.385  | -8.329  | -1.136 | 1.00 | 0.00 |
| ATOM | 749 | CG  | MET | 46 | -6.059  | -9.811  | 0.275  | 1.00 | 0.00 |
| ATOM | 750 | HG2 | MET | 46 | -6.777  | -10.631 | 0.300  | 1.00 | 0.00 |
| ATOM | 751 | HG3 | MET | 46 | -5.048  | -10.212 | 0.353  | 1.00 | 0.00 |
| ATOM | 752 | SD  | MET | 46 | -6.369  | -8.706  | 1.674  | 1.00 | 0.00 |
| ATOM | 753 | CE  | MET | 46 | -6.975  | -9.970  | 2.820  | 1.00 | 0.00 |
| ATOM | 754 | HE1 | MET | 46 | -6.198  | -10.719 | 2.980  | 1.00 | 0.00 |
| ATOM | 755 | HE2 | MET | 46 | -7.232  | -9.505  | 3.772  | 1.00 | 0.00 |
| ATOM | 756 | HE3 | MET | 46 | -7.859  | -10.449 | 2.399  | 1.00 | 0.00 |
| ATOM | 757 | C   | MET | 46 | -7.712  | -7.628  | -2.435 | 1.00 | 0.00 |
| ATOM | 758 | O   | MET | 46 | -7.497  | -6.427  | -2.599 | 1.00 | 0.00 |
| ATOM | 759 | N   | SER | 47 | -8.105  | -8.444  | -3.411 | 1.00 | 0.00 |
| ATOM | 760 | H   | SER | 47 | -8.244  | -9.426  | -3.216 | 1.00 | 0.00 |
| ATOM | 761 | CA  | SER | 47 | -8.313  | -7.973  | -4.778 | 1.00 | 0.00 |
| ATOM | 762 | HA  | SER | 47 | -7.385  | -7.565  | -5.179 | 1.00 | 0.00 |

|      |     |     |     |    |         |         |        |      |      |
|------|-----|-----|-----|----|---------|---------|--------|------|------|
| ATOM | 763 | CB  | SER | 47 | -8.759  | -9.137  | -5.665 | 1.00 | 0.00 |
| ATOM | 764 | HB2 | SER | 47 | -9.751  | -9.469  | -5.360 | 1.00 | 0.00 |
| ATOM | 765 | HB3 | SER | 47 | -8.788  | -8.813  | -6.705 | 1.00 | 0.00 |
| ATOM | 766 | OG  | SER | 47 | -7.838  | -10.211 | -5.530 | 1.00 | 0.00 |
| ATOM | 767 | HG  | SER | 47 | -8.116  | -10.943 | -6.086 | 1.00 | 0.00 |
| ATOM | 768 | C   | SER | 47 | -9.357  | -6.860  | -4.837 | 1.00 | 0.00 |
| ATOM | 769 | O   | SER | 47 | -9.274  | -5.967  | -5.680 | 1.00 | 0.00 |
| ATOM | 770 | N   | GLU | 48 | -10.348 | -6.929  | -3.952 | 1.00 | 0.00 |
| ATOM | 771 | H   | GLU | 48 | -10.396 | -7.691  | -3.290 | 1.00 | 0.00 |
| ATOM | 772 | CA  | GLU | 48 | -11.410 | -5.926  | -3.933 | 1.00 | 0.00 |
| ATOM | 773 | HA  | GLU | 48 | -11.974 | -5.961  | -4.864 | 1.00 | 0.00 |
| ATOM | 774 | CB  | GLU | 48 | -12.370 | -6.202  | -2.767 | 1.00 | 0.00 |
| ATOM | 775 | HB2 | GLU | 48 | -12.194 | -7.209  | -2.387 | 1.00 | 0.00 |
| ATOM | 776 | HB3 | GLU | 48 | -12.189 | -5.478  | -1.973 | 1.00 | 0.00 |
| ATOM | 777 | CG  | GLU | 48 | -13.823 | -6.083  | -3.246 | 1.00 | 0.00 |
| ATOM | 778 | HG2 | GLU | 48 | -13.871 | -6.339  | -4.304 | 1.00 | 0.00 |
| ATOM | 779 | HG3 | GLU | 48 | -14.437 | -6.780  | -2.676 | 1.00 | 0.00 |
| ATOM | 780 | CD  | GLU | 48 | -14.344 | -4.661  | -3.042 | 1.00 | 0.00 |
| ATOM | 781 | OE1 | GLU | 48 | -13.596 | -3.729  | -3.288 | 1.00 | 0.00 |
| ATOM | 782 | OE2 | GLU | 48 | -15.490 | -4.524  | -2.645 | 1.00 | 0.00 |
| ATOM | 783 | C   | GLU | 48 | -10.822 | -4.522  | -3.799 | 1.00 | 0.00 |
| ATOM | 784 | O   | GLU | 48 | -11.111 | -3.641  | -4.610 | 1.00 | 0.00 |

|      |     |     |     |    |         |        |        |      |      |
|------|-----|-----|-----|----|---------|--------|--------|------|------|
| ATOM | 785 | N   | CYX | 49 | -9.989  | -4.324 | -2.781 | 1.00 | 0.00 |
| ATOM | 786 | H   | CYX | 49 | -9.799  | -5.064 | -2.120 | 1.00 | 0.00 |
| ATOM | 787 | CA  | CYX | 49 | -9.360  | -3.024 | -2.564 | 1.00 | 0.00 |
| ATOM | 788 | HA  | CYX | 49 | -10.114 | -2.238 | -2.584 | 1.00 | 0.00 |
| ATOM | 789 | CB  | CYX | 49 | -8.657  | -2.996 | -1.196 | 1.00 | 0.00 |
| ATOM | 790 | HB2 | CYX | 49 | -8.451  | -4.016 | -0.871 | 1.00 | 0.00 |
| ATOM | 791 | HB3 | CYX | 49 | -7.719  | -2.447 | -1.280 | 1.00 | 0.00 |
| ATOM | 792 | SG  | CYX | 49 | -9.725  | -2.169 | 0.011  | 1.00 | 0.00 |
| ATOM | 793 | C   | CYX | 49 | -8.354  | -2.716 | -3.675 | 1.00 | 0.00 |
| ATOM | 794 | O   | CYX | 49 | -8.153  | -1.556 | -4.028 | 1.00 | 0.00 |
| ATOM | 795 | N   | CYX | 50 | -7.725  | -3.764 | -4.213 | 1.00 | 0.00 |
| ATOM | 796 | H   | CYX | 50 | -7.921  | -4.696 | -3.874 | 1.00 | 0.00 |
| ATOM | 797 | CA  | CYX | 50 | -6.726  | -3.606 | -5.276 | 1.00 | 0.00 |
| ATOM | 798 | HA  | CYX | 50 | -5.838  | -3.110 | -4.883 | 1.00 | 0.00 |
| ATOM | 799 | CB  | CYX | 50 | -6.319  | -4.974 | -5.822 | 1.00 | 0.00 |
| ATOM | 800 | HB2 | CYX | 50 | -6.047  | -5.630 | -4.995 | 1.00 | 0.00 |
| ATOM | 801 | HB3 | CYX | 50 | -7.153  | -5.410 | -6.371 | 1.00 | 0.00 |
| ATOM | 802 | SG  | CYX | 50 | -4.927  | -4.779 | -6.967 | 1.00 | 0.00 |
| ATOM | 803 | C   | CYX | 50 | -7.239  | -2.753 | -6.433 | 1.00 | 0.00 |
| ATOM | 804 | O   | CYX | 50 | -6.517  | -1.900 | -6.950 | 1.00 | 0.00 |
| ATOM | 805 | N   | GLU | 51 | -8.475  | -3.002 | -6.853 | 1.00 | 0.00 |
| ATOM | 806 | H   | GLU | 51 | -9.028  | -3.731 | -6.425 | 1.00 | 0.00 |

|      |     |     |     |    |         |        |         |      |      |
|------|-----|-----|-----|----|---------|--------|---------|------|------|
| ATOM | 807 | CA  | GLU | 51 | -9.052  | -2.261 | -7.970  | 1.00 | 0.00 |
| ATOM | 808 | HA  | GLU | 51 | -8.453  | -2.412 | -8.868  | 1.00 | 0.00 |
| ATOM | 809 | CB  | GLU | 51 | -10.478 | -2.753 | -8.243  | 1.00 | 0.00 |
| ATOM | 810 | HB2 | GLU | 51 | -10.471 | -3.837 | -8.361  | 1.00 | 0.00 |
| ATOM | 811 | HB3 | GLU | 51 | -11.120 | -2.484 | -7.404  | 1.00 | 0.00 |
| ATOM | 812 | CG  | GLU | 51 | -11.012 | -2.102 | -9.526  | 1.00 | 0.00 |
| ATOM | 813 | HG2 | GLU | 51 | -12.059 | -2.376 | -9.656  | 1.00 | 0.00 |
| ATOM | 814 | HG3 | GLU | 51 | -10.929 | -1.020 | -9.430  | 1.00 | 0.00 |
| ATOM | 815 | CD  | GLU | 51 | -10.207 | -2.570 | -10.742 | 1.00 | 0.00 |
| ATOM | 816 | OE1 | GLU | 51 | -9.716  | -3.688 | -10.720 | 1.00 | 0.00 |
| ATOM | 817 | OE2 | GLU | 51 | -10.097 | -1.801 | -11.682 | 1.00 | 0.00 |
| ATOM | 818 | C   | GLU | 51 | -9.069  | -0.757 | -7.697  | 1.00 | 0.00 |
| ATOM | 819 | O   | GLU | 51 | -8.851  | 0.044  | -8.604  | 1.00 | 0.00 |
| ATOM | 820 | N   | GLN | 52 | -9.340  | -0.380 | -6.450  | 1.00 | 0.00 |
| ATOM | 821 | H   | GLN | 52 | -9.545  | -1.068 | -5.739  | 1.00 | 0.00 |
| ATOM | 822 | CA  | GLN | 52 | -9.395  | 1.034  | -6.082  | 1.00 | 0.00 |
| ATOM | 823 | HA  | GLN | 52 | -10.152 | 1.549  | -6.672  | 1.00 | 0.00 |
| ATOM | 824 | CB  | GLN | 52 | -9.758  | 1.161  | -4.605  | 1.00 | 0.00 |
| ATOM | 825 | HB2 | GLN | 52 | -9.000  | 0.666  | -3.997  | 1.00 | 0.00 |
| ATOM | 826 | HB3 | GLN | 52 | -9.813  | 2.214  | -4.330  | 1.00 | 0.00 |
| ATOM | 827 | CG  | GLN | 52 | -11.118 | 0.499  | -4.363  | 1.00 | 0.00 |
| ATOM | 828 | HG2 | GLN | 52 | -11.249 | -0.341 | -5.045  | 1.00 | 0.00 |

|      |     |      |     |    |         |        |        |      |      |
|------|-----|------|-----|----|---------|--------|--------|------|------|
| ATOM | 829 | HG3  | GLN | 52 | -11.179 | 0.144  | -3.334 | 1.00 | 0.00 |
| ATOM | 830 | CD   | GLN | 52 | -12.244 | 1.501  | -4.601 | 1.00 | 0.00 |
| ATOM | 831 | OE1  | GLN | 52 | -12.347 | 2.077  | -5.683 | 1.00 | 0.00 |
| ATOM | 832 | NE2  | GLN | 52 | -13.101 | 1.743  | -3.646 | 1.00 | 0.00 |
| ATOM | 833 | HE21 | GLN | 52 | -13.848 | 2.405  | -3.798 | 1.00 | 0.00 |
| ATOM | 834 | HE22 | GLN | 52 | -13.012 | 1.266  | -2.759 | 1.00 | 0.00 |
| ATOM | 835 | C    | GLN | 52 | -8.066  | 1.737  | -6.360 | 1.00 | 0.00 |
| ATOM | 836 | O    | GLN | 52 | -8.032  | 2.750  | -7.058 | 1.00 | 0.00 |
| ATOM | 837 | N    | LEU | 53 | -6.970  | 1.187  | -5.829 | 1.00 | 0.00 |
| ATOM | 838 | H    | LEU | 53 | -7.027  | 0.331  | -5.295 | 1.00 | 0.00 |
| ATOM | 839 | CA   | LEU | 53 | -5.647  | 1.777  | -6.058 | 1.00 | 0.00 |
| ATOM | 840 | HA   | LEU | 53 | -5.618  | 2.782  | -5.637 | 1.00 | 0.00 |
| ATOM | 841 | CB   | LEU | 53 | -4.547  | 0.937  | -5.395 | 1.00 | 0.00 |
| ATOM | 842 | HB2  | LEU | 53 | -4.381  | 0.058  | -6.018 | 1.00 | 0.00 |
| ATOM | 843 | HB3  | LEU | 53 | -3.632  | 1.528  | -5.352 | 1.00 | 0.00 |
| ATOM | 844 | CG   | LEU | 53 | -4.936  | 0.493  | -3.978 | 1.00 | 0.00 |
| ATOM | 845 | HG   | LEU | 53 | -4.039  | 0.498  | -3.357 | 1.00 | 0.00 |
| ATOM | 846 | CD1  | LEU | 53 | -5.991  | 1.425  | -3.361 | 1.00 | 0.00 |
| ATOM | 847 | HD11 | LEU | 53 | -6.888  | 1.420  | -3.980 | 1.00 | 0.00 |
| ATOM | 848 | HD12 | LEU | 53 | -6.240  | 1.078  | -2.358 | 1.00 | 0.00 |
| ATOM | 849 | HD13 | LEU | 53 | -5.593  | 2.438  | -3.306 | 1.00 | 0.00 |
| ATOM | 850 | CD2  | LEU | 53 | -5.491  | -0.928 | -4.065 | 1.00 | 0.00 |

|      |     |      |     |    |        |        |         |      |      |
|------|-----|------|-----|----|--------|--------|---------|------|------|
| ATOM | 851 | HD21 | LEU | 53 | -4.728 | -1.593 | -4.471  | 1.00 | 0.00 |
| ATOM | 852 | HD22 | LEU | 53 | -5.776 | -1.269 | -3.069  | 1.00 | 0.00 |
| ATOM | 853 | HD23 | LEU | 53 | -6.365 | -0.938 | -4.716  | 1.00 | 0.00 |
| ATOM | 854 | C    | LEU | 53 | -5.377 | 1.769  | -7.544  | 1.00 | 0.00 |
| ATOM | 855 | O    | LEU | 53 | -5.002 | 2.772  | -8.151  | 1.00 | 0.00 |
| ATOM | 856 | N    | GLU | 54 | -5.596 | 0.594  | -8.098  | 1.00 | 0.00 |
| ATOM | 857 | H    | GLU | 54 | -5.861 | -0.177 | -7.501  | 1.00 | 0.00 |
| ATOM | 858 | CA   | GLU | 54 | -5.422 | 0.339  | -9.506  | 1.00 | 0.00 |
| ATOM | 859 | HA   | GLU | 54 | -4.379 | 0.443  | -9.806  | 1.00 | 0.00 |
| ATOM | 860 | CB   | GLU | 54 | -5.858 | -1.102 | -9.751  | 1.00 | 0.00 |
| ATOM | 861 | HB2  | GLU | 54 | -5.150 | -1.772 | -9.262  | 1.00 | 0.00 |
| ATOM | 862 | HB3  | GLU | 54 | -6.850 | -1.248 | -9.323  | 1.00 | 0.00 |
| ATOM | 863 | CG   | GLU | 54 | -5.899 | -1.409 | -11.254 | 1.00 | 0.00 |
| ATOM | 864 | HG2  | GLU | 54 | -6.532 | -0.672 | -11.748 | 1.00 | 0.00 |
| ATOM | 865 | HG3  | GLU | 54 | -4.888 | -1.347 | -11.657 | 1.00 | 0.00 |
| ATOM | 866 | CD   | GLU | 54 | -6.461 | -2.812 | -11.501 | 1.00 | 0.00 |
| ATOM | 867 | OE1  | GLU | 54 | -6.778 | -3.492 | -10.537 | 1.00 | 0.00 |
| ATOM | 868 | OE2  | GLU | 54 | -6.565 | -3.187 | -12.658 | 1.00 | 0.00 |
| ATOM | 869 | C    | GLU | 54 | -6.221 | 1.338  | -10.344 | 1.00 | 0.00 |
| ATOM | 870 | O    | GLU | 54 | -5.801 | 1.720  | -11.437 | 1.00 | 0.00 |
| ATOM | 871 | N    | GLY | 55 | -7.360 | 1.773  | -9.810  | 1.00 | 0.00 |
| ATOM | 872 | H    | GLY | 55 | -7.662 | 1.431  | -8.909  | 1.00 | 0.00 |



|      |     |     |     |    |        |       |         |      |      |
|------|-----|-----|-----|----|--------|-------|---------|------|------|
| ATOM | 873 | CA  | GLY | 55 | -8.203 | 2.748 | -10.500 | 1.00 | 0.00 |
| ATOM | 874 | HA2 | GLY | 55 | -8.110 | 2.610 | -11.577 | 1.00 | 0.00 |
| ATOM | 875 | HA3 | GLY | 55 | -9.242 | 2.604 | -10.203 | 1.00 | 0.00 |
| ATOM | 876 | C   | GLY | 55 | -7.776 | 4.171 | -10.142 | 1.00 | 0.00 |
| ATOM | 877 | O   | GLY | 55 | -8.173 | 5.135 | -10.797 | 1.00 | 0.00 |
| ATOM | 878 | N   | MET | 56 | -6.960 | 4.285 | -9.096  | 1.00 | 0.00 |
| ATOM | 879 | H   | MET | 56 | -6.679 | 3.458 | -8.588  | 1.00 | 0.00 |
| ATOM | 880 | CA  | MET | 56 | -6.465 | 5.582 | -8.638  | 1.00 | 0.00 |
| ATOM | 881 | HA  | MET | 56 | -7.219 | 6.352 | -8.798  | 1.00 | 0.00 |
| ATOM | 882 | CB  | MET | 56 | -6.148 | 5.510 | -7.137  | 1.00 | 0.00 |
| ATOM | 883 | HB2 | MET | 56 | -7.064 | 5.292 | -6.587  | 1.00 | 0.00 |
| ATOM | 884 | HB3 | MET | 56 | -5.422 | 4.716 | -6.962  | 1.00 | 0.00 |
| ATOM | 885 | CG  | MET | 56 | -5.570 | 6.844 | -6.657  | 1.00 | 0.00 |
| ATOM | 886 | HG2 | MET | 56 | -5.189 | 6.735 | -5.641  | 1.00 | 0.00 |
| ATOM | 887 | HG3 | MET | 56 | -4.759 | 7.152 | -7.317  | 1.00 | 0.00 |
| ATOM | 888 | SD  | MET | 56 | -6.864 | 8.107 | -6.674  | 1.00 | 0.00 |
| ATOM | 889 | CE  | MET | 56 | -6.852 | 8.470 | -4.903  | 1.00 | 0.00 |
| ATOM | 890 | HE1 | MET | 56 | -5.863 | 8.823 | -4.610  | 1.00 | 0.00 |
| ATOM | 891 | HE2 | MET | 56 | -7.591 | 9.240 | -4.684  | 1.00 | 0.00 |
| ATOM | 892 | HE3 | MET | 56 | -7.094 | 7.565 | -4.344  | 1.00 | 0.00 |
| ATOM | 893 | C   | MET | 56 | -5.210 | 5.977 | -9.409  | 1.00 | 0.00 |
| ATOM | 894 | O   | MET | 56 | -4.367 | 5.129 | -9.711  | 1.00 | 0.00 |

|      |     |     |     |    |        |        |         |      |      |
|------|-----|-----|-----|----|--------|--------|---------|------|------|
| ATOM | 895 | N   | ASP | 57 | -5.086 | 7.269  | -9.722  | 1.00 | 0.00 |
| ATOM | 896 | H   | ASP | 57 | -5.809 | 7.930  | -9.475  | 1.00 | 0.00 |
| ATOM | 897 | CA  | ASP | 57 | -3.919 | 7.759  | -10.452 | 1.00 | 0.00 |
| ATOM | 898 | HA  | ASP | 57 | -3.912 | 7.348  | -11.462 | 1.00 | 0.00 |
| ATOM | 899 | CB  | ASP | 57 | -3.959 | 9.289  | -10.545 | 1.00 | 0.00 |
| ATOM | 900 | HB2 | ASP | 57 | -4.031 | 9.701  | -9.538  | 1.00 | 0.00 |
| ATOM | 901 | HB3 | ASP | 57 | -3.040 | 9.639  | -11.015 | 1.00 | 0.00 |
| ATOM | 902 | CG  | ASP | 57 | -5.162 | 9.748  | -11.372 | 1.00 | 0.00 |
| ATOM | 903 | OD1 | ASP | 57 | -5.727 | 8.931  | -12.083 | 1.00 | 0.00 |
| ATOM | 904 | OD2 | ASP | 57 | -5.501 | 10.917 | -11.282 | 1.00 | 0.00 |
| ATOM | 905 | C   | ASP | 57 | -2.636 | 7.317  | -9.752  | 1.00 | 0.00 |
| ATOM | 906 | O   | ASP | 57 | -2.589 | 7.233  | -8.525  | 1.00 | 0.00 |
| ATOM | 907 | N   | GLU | 58 | -1.604 | 7.023  | -10.538 | 1.00 | 0.00 |
| ATOM | 908 | H   | GLU | 58 | -1.689 | 7.087  | -11.542 | 1.00 | 0.00 |
| ATOM | 909 | CA  | GLU | 58 | -0.333 | 6.572  | -9.979  | 1.00 | 0.00 |
| ATOM | 910 | HA  | GLU | 58 | -0.458 | 5.605  | -9.492  | 1.00 | 0.00 |
| ATOM | 911 | CB  | GLU | 58 | 0.700  | 6.426  | -11.098 | 1.00 | 0.00 |
| ATOM | 912 | HB2 | GLU | 58 | 0.426  | 5.592  | -11.744 | 1.00 | 0.00 |
| ATOM | 913 | HB3 | GLU | 58 | 0.737  | 7.343  | -11.685 | 1.00 | 0.00 |
| ATOM | 914 | CG  | GLU | 58 | 2.072  | 6.161  | -10.481 | 1.00 | 0.00 |
| ATOM | 915 | HG2 | GLU | 58 | 2.338  | 6.996  | -9.833  | 1.00 | 0.00 |
| ATOM | 916 | HG3 | GLU | 58 | 2.031  | 5.244  | -9.892  | 1.00 | 0.00 |

|      |     |     |     |    |        |        |         |      |      |
|------|-----|-----|-----|----|--------|--------|---------|------|------|
| ATOM | 917 | CD  | GLU | 58 | 3.123  | 6.014  | -11.578 | 1.00 | 0.00 |
| ATOM | 918 | OE1 | GLU | 58 | 3.128  | 4.984  | -12.234 | 1.00 | 0.00 |
| ATOM | 919 | OE2 | GLU | 58 | 3.910  | 6.932  | -11.745 | 1.00 | 0.00 |
| ATOM | 920 | C   | GLU | 58 | 0.202  | 7.539  | -8.926  | 1.00 | 0.00 |
| ATOM | 921 | O   | GLU | 58 | 0.444  | 7.149  | -7.784  | 1.00 | 0.00 |
| ATOM | 922 | N   | SER | 59 | 0.389  | 8.796  | -9.314  | 1.00 | 0.00 |
| ATOM | 923 | H   | SER | 59 | 0.196  | 9.074  | -10.265 | 1.00 | 0.00 |
| ATOM | 924 | CA  | SER | 59 | 0.898  | 9.803  | -8.388  | 1.00 | 0.00 |
| ATOM | 925 | HA  | SER | 59 | 1.903  | 9.536  | -8.058  | 1.00 | 0.00 |
| ATOM | 926 | CB  | SER | 59 | 0.957  | 11.164 | -9.084  | 1.00 | 0.00 |
| ATOM | 927 | HB2 | SER | 59 | -0.049 | 11.476 | -9.363  | 1.00 | 0.00 |
| ATOM | 928 | HB3 | SER | 59 | 1.392  | 11.901 | -8.409  | 1.00 | 0.00 |
| ATOM | 929 | OG  | SER | 59 | 1.761  | 11.059 | -10.252 | 1.00 | 0.00 |
| ATOM | 930 | HG  | SER | 59 | 1.800  | 11.911 | -10.691 | 1.00 | 0.00 |
| ATOM | 931 | C   | SER | 59 | 0.001  | 9.892  | -7.160  | 1.00 | 0.00 |
| ATOM | 932 | O   | SER | 59 | 0.467  | 10.129 | -6.045  | 1.00 | 0.00 |
| ATOM | 933 | N   | CYX | 60 | -1.290 | 9.695  | -7.388  | 1.00 | 0.00 |
| ATOM | 934 | H   | CYX | 60 | -1.612 | 9.527  | -8.330  | 1.00 | 0.00 |
| ATOM | 935 | CA  | CYX | 60 | -2.281 | 9.747  | -6.315  | 1.00 | 0.00 |
| ATOM | 936 | HA  | CYX | 60 | -2.085 | 10.600 | -5.666  | 1.00 | 0.00 |
| ATOM | 937 | CB  | CYX | 60 | -3.684 | 9.894  | -6.907  | 1.00 | 0.00 |
| ATOM | 938 | HB2 | CYX | 60 | -3.907 | 9.029  | -7.531  | 1.00 | 0.00 |

|      |     |      |     |    |        |        |        |      |      |
|------|-----|------|-----|----|--------|--------|--------|------|------|
| ATOM | 939 | HB3  | CYX | 60 | -4.414 | 9.957  | -6.100 | 1.00 | 0.00 |
| ATOM | 940 | SG   | CYX | 60 | -3.763 | 11.406 | -7.898 | 1.00 | 0.00 |
| ATOM | 941 | C    | CYX | 60 | -2.218 | 8.494  | -5.449 | 1.00 | 0.00 |
| ATOM | 942 | O    | CYX | 60 | -2.624 | 8.509  | -4.286 | 1.00 | 0.00 |
| ATOM | 943 | N    | ARG | 61 | -1.731 | 7.405  | -6.036 | 1.00 | 0.00 |
| ATOM | 944 | H    | ARG | 61 | -1.425 | 7.442  | -6.998 | 1.00 | 0.00 |
| ATOM | 945 | CA   | ARG | 61 | -1.642 | 6.132  | -5.331 | 1.00 | 0.00 |
| ATOM | 946 | HA   | ARG | 61 | -2.627 | 5.819  | -4.985 | 1.00 | 0.00 |
| ATOM | 947 | CB   | ARG | 61 | -1.096 | 5.064  | -6.283 | 1.00 | 0.00 |
| ATOM | 948 | HB2  | ARG | 61 | -1.648 | 5.106  | -7.221 | 1.00 | 0.00 |
| ATOM | 949 | HB3  | ARG | 61 | -0.041 | 5.261  | -6.473 | 1.00 | 0.00 |
| ATOM | 950 | CG   | ARG | 61 | -1.251 | 3.672  | -5.662 | 1.00 | 0.00 |
| ATOM | 951 | HG2  | ARG | 61 | -0.780 | 3.654  | -4.679 | 1.00 | 0.00 |
| ATOM | 952 | HG3  | ARG | 61 | -2.309 | 3.431  | -5.562 | 1.00 | 0.00 |
| ATOM | 953 | CD   | ARG | 61 | -0.577 | 2.640  | -6.568 | 1.00 | 0.00 |
| ATOM | 954 | HD2  | ARG | 61 | 0.503  | 2.791  | -6.567 | 1.00 | 0.00 |
| ATOM | 955 | HD3  | ARG | 61 | -0.802 | 1.632  | -6.218 | 1.00 | 0.00 |
| ATOM | 956 | NE   | ARG | 61 | -1.068 | 2.781  | -7.937 | 1.00 | 0.00 |
| ATOM | 957 | HE   | ARG | 61 | -0.671 | 3.489  | -8.538 | 1.00 | 0.00 |
| ATOM | 958 | CZ   | ARG | 61 | -2.035 | 2.005  | -8.422 | 1.00 | 0.00 |
| ATOM | 959 | NH1  | ARG | 61 | -2.550 | 1.052  | -7.691 | 1.00 | 0.00 |
| ATOM | 960 | HH11 | ARG | 61 | -2.212 | 0.902  | -6.751 | 1.00 | 0.00 |

|      |     |      |     |    |        |        |         |      |      |
|------|-----|------|-----|----|--------|--------|---------|------|------|
| ATOM | 961 | HH12 | ARG | 61 | -3.283 | 0.469  | -8.069  | 1.00 | 0.00 |
| ATOM | 962 | NH2  | ARG | 61 | -2.465 | 2.195  | -9.638  | 1.00 | 0.00 |
| ATOM | 963 | HH21 | ARG | 61 | -2.062 | 2.928  | -10.204 | 1.00 | 0.00 |
| ATOM | 964 | HH22 | ARG | 61 | -3.198 | 1.608  | -10.008 | 1.00 | 0.00 |
| ATOM | 965 | C    | ARG | 61 | -0.731 | 6.242  | -4.111  | 1.00 | 0.00 |
| ATOM | 966 | O    | ARG | 61 | -1.024 | 5.670  | -3.060  | 1.00 | 0.00 |
| ATOM | 967 | N    | CYX | 62 | 0.369  | 6.980  | -4.251  | 1.00 | 0.00 |
| ATOM | 968 | H    | CYX | 62 | 0.585  | 7.426  | -5.131  | 1.00 | 0.00 |
| ATOM | 969 | CA   | CYX | 62 | 1.303  | 7.150  | -3.142  | 1.00 | 0.00 |
| ATOM | 970 | HA   | CYX | 62 | 1.724  | 6.185  | -2.857  | 1.00 | 0.00 |
| ATOM | 971 | CB   | CYX | 62 | 2.449  | 8.081  | -3.558  | 1.00 | 0.00 |
| ATOM | 972 | HB2  | CYX | 62 | 2.123  | 9.118  | -3.477  | 1.00 | 0.00 |
| ATOM | 973 | HB3  | CYX | 62 | 3.306  | 7.918  | -2.904  | 1.00 | 0.00 |
| ATOM | 974 | SG   | CYX | 62 | 2.912  | 7.755  | -5.278  | 1.00 | 0.00 |
| ATOM | 975 | C    | CYX | 62 | 0.578  | 7.740  | -1.934  | 1.00 | 0.00 |
| ATOM | 976 | O    | CYX | 62 | 0.536  | 7.137  | -0.861  | 1.00 | 0.00 |
| ATOM | 977 | N    | GLU | 63 | -0.002 | 8.922  | -2.132  | 1.00 | 0.00 |
| ATOM | 978 | H    | GLU | 63 | 0.073  | 9.373  | -3.032  | 1.00 | 0.00 |
| ATOM | 979 | CA   | GLU | 63 | -0.743 | 9.604  | -1.076  | 1.00 | 0.00 |
| ATOM | 980 | HA   | GLU | 63 | -0.088 | 9.813  | -0.229  | 1.00 | 0.00 |
| ATOM | 981 | CB   | GLU | 63 | -1.291 | 10.930 | -1.611  | 1.00 | 0.00 |
| ATOM | 982 | HB2  | GLU | 63 | -0.483 | 11.487 | -2.086  | 1.00 | 0.00 |

|      |      |     |     |    |        |        |        |      |      |
|------|------|-----|-----|----|--------|--------|--------|------|------|
| ATOM | 983  | HB3 | GLU | 63 | -2.072 | 10.727 | -2.343 | 1.00 | 0.00 |
| ATOM | 984  | CG  | GLU | 63 | -1.875 | 11.759 | -0.457 | 1.00 | 0.00 |
| ATOM | 985  | HG2 | GLU | 63 | -2.596 | 11.149 | 0.088  | 1.00 | 0.00 |
| ATOM | 986  | HG3 | GLU | 63 | -1.065 | 12.049 | 0.213  | 1.00 | 0.00 |
| ATOM | 987  | CD  | GLU | 63 | -2.569 | 13.014 | -0.991 | 1.00 | 0.00 |
| ATOM | 988  | OE1 | GLU | 63 | -2.665 | 13.157 | -2.201 | 1.00 | 0.00 |
| ATOM | 989  | OE2 | GLU | 63 | -2.998 | 13.817 | -0.178 | 1.00 | 0.00 |
| ATOM | 990  | C   | GLU | 63 | -1.905 | 8.745  | -0.582 | 1.00 | 0.00 |
| ATOM | 991  | O   | GLU | 63 | -2.235 | 8.748  | 0.604  | 1.00 | 0.00 |
| ATOM | 992  | N   | GLY | 64 | -2.538 | 8.034  | -1.516 | 1.00 | 0.00 |
| ATOM | 993  | H   | GLY | 64 | -2.224 | 8.068  | -2.475 | 1.00 | 0.00 |
| ATOM | 994  | CA  | GLY | 64 | -3.689 | 7.194  | -1.193 | 1.00 | 0.00 |
| ATOM | 995  | HA2 | GLY | 64 | -4.521 | 7.839  | -0.913 | 1.00 | 0.00 |
| ATOM | 996  | HA3 | GLY | 64 | -3.957 | 6.618  | -2.078 | 1.00 | 0.00 |
| ATOM | 997  | C   | GLY | 64 | -3.399 | 6.233  | -0.046 | 1.00 | 0.00 |
| ATOM | 998  | O   | GLY | 64 | -4.086 | 6.257  | 0.975  | 1.00 | 0.00 |
| ATOM | 999  | N   | LEU | 65 | -2.392 | 5.383  | -0.220 | 1.00 | 0.00 |
| ATOM | 1000 | H   | LEU | 65 | -1.870 | 5.371  | -1.084 | 1.00 | 0.00 |
| ATOM | 1001 | CA  | LEU | 65 | -2.042 | 4.413  | 0.813  | 1.00 | 0.00 |
| ATOM | 1002 | HA  | LEU | 65 | -2.878 | 3.735  | 0.986  | 1.00 | 0.00 |
| ATOM | 1003 | CB  | LEU | 65 | -0.827 | 3.589  | 0.374  | 1.00 | 0.00 |
| ATOM | 1004 | HB2 | LEU | 65 | 0.003  | 4.259  | 0.151  | 1.00 | 0.00 |

|      |      |      |     |    |        |       |        |      |      |
|------|------|------|-----|----|--------|-------|--------|------|------|
| ATOM | 1005 | HB3  | LEU | 65 | -0.539 | 2.910 | 1.177  | 1.00 | 0.00 |
| ATOM | 1006 | CG   | LEU | 65 | -1.180 | 2.778 | -0.878 | 1.00 | 0.00 |
| ATOM | 1007 | HG   | LEU | 65 | -1.409 | 3.458 | -1.698 | 1.00 | 0.00 |
| ATOM | 1008 | CD1  | LEU | 65 | 0.007  | 1.893 | -1.266 | 1.00 | 0.00 |
| ATOM | 1009 | HD11 | LEU | 65 | 0.237  | 1.212 | -0.446 | 1.00 | 0.00 |
| ATOM | 1010 | HD12 | LEU | 65 | -0.244 | 1.316 | -2.156 | 1.00 | 0.00 |
| ATOM | 1011 | HD13 | LEU | 65 | 0.876  | 2.518 | -1.472 | 1.00 | 0.00 |
| ATOM | 1012 | CD2  | LEU | 65 | -2.403 | 1.896 | -0.590 | 1.00 | 0.00 |
| ATOM | 1013 | HD21 | LEU | 65 | -3.249 | 2.525 | -0.315 | 1.00 | 0.00 |
| ATOM | 1014 | HD22 | LEU | 65 | -2.653 | 1.319 | -1.480 | 1.00 | 0.00 |
| ATOM | 1015 | HD23 | LEU | 65 | -2.175 | 1.215 | 0.231  | 1.00 | 0.00 |
| ATOM | 1016 | C    | LEU | 65 | -1.747 | 5.096 | 2.144  | 1.00 | 0.00 |
| ATOM | 1017 | O    | LEU | 65 | -2.222 | 4.656 | 3.189  | 1.00 | 0.00 |
| ATOM | 1018 | N    | ARG | 66 | -0.965 | 6.173 | 2.103  | 1.00 | 0.00 |
| ATOM | 1019 | H    | ARG | 66 | -0.577 | 6.500 | 1.230  | 1.00 | 0.00 |
| ATOM | 1020 | CA   | ARG | 66 | -0.627 | 6.896 | 3.325  | 1.00 | 0.00 |
| ATOM | 1021 | HA   | ARG | 66 | -0.082 | 6.243 | 4.008  | 1.00 | 0.00 |
| ATOM | 1022 | CB   | ARG | 66 | 0.257  | 8.102 | 2.992  | 1.00 | 0.00 |
| ATOM | 1023 | HB2  | ARG | 66 | -0.244 | 8.725 | 2.251  | 1.00 | 0.00 |
| ATOM | 1024 | HB3  | ARG | 66 | 0.432  | 8.684 | 3.897  | 1.00 | 0.00 |
| ATOM | 1025 | CG   | ARG | 66 | 1.597  | 7.618 | 2.430  | 1.00 | 0.00 |
| ATOM | 1026 | HG2  | ARG | 66 | 2.078  | 6.959 | 3.154  | 1.00 | 0.00 |

|      |      |          |    |        |        |       |      |      |
|------|------|----------|----|--------|--------|-------|------|------|
| ATOM | 1027 | HG3 ARG  | 66 | 1.426  | 7.073  | 1.502 | 1.00 | 0.00 |
| ATOM | 1028 | CD ARG   | 66 | 2.503  | 8.822  | 2.156 | 1.00 | 0.00 |
| ATOM | 1029 | HD2 ARG  | 66 | 3.400  | 8.497  | 1.627 | 1.00 | 0.00 |
| ATOM | 1030 | HD3 ARG  | 66 | 1.971  | 9.555  | 1.551 | 1.00 | 0.00 |
| ATOM | 1031 | NE ARG   | 66 | 2.903  | 9.453  | 3.412 | 1.00 | 0.00 |
| ATOM | 1032 | HE ARG   | 66 | 2.442  | 10.296 | 3.722 | 1.00 | 0.00 |
| ATOM | 1033 | CZ ARG   | 66 | 3.871  | 8.942  | 4.172 | 1.00 | 0.00 |
| ATOM | 1034 | NH1 ARG  | 66 | 4.491  | 7.853  | 3.803 | 1.00 | 0.00 |
| ATOM | 1035 | HH11 ARG | 66 | 4.235  | 7.398  | 2.939 | 1.00 | 0.00 |
| ATOM | 1036 | HH12 ARG | 66 | 5.224  | 7.471  | 4.384 | 1.00 | 0.00 |
| ATOM | 1037 | NH2 ARG  | 66 | 4.201  | 9.531  | 5.287 | 1.00 | 0.00 |
| ATOM | 1038 | HH21 ARG | 66 | 3.722  | 10.373 | 5.571 | 1.00 | 0.00 |
| ATOM | 1039 | HH22 ARG | 66 | 4.935  | 9.142  | 5.862 | 1.00 | 0.00 |
| ATOM | 1040 | C ARG    | 66 | -1.891 | 7.372  | 4.037 | 1.00 | 0.00 |
| ATOM | 1041 | O ARG    | 66 | -2.091 | 7.096  | 5.221 | 1.00 | 0.00 |
| ATOM | 1042 | N MET    | 67 | -2.740 | 8.085  | 3.301 | 1.00 | 0.00 |
| ATOM | 1043 | H MET    | 67 | -2.517 | 8.305  | 2.341 | 1.00 | 0.00 |
| ATOM | 1044 | CA MET   | 67 | -3.989 | 8.598  | 3.857 | 1.00 | 0.00 |
| ATOM | 1045 | HA MET   | 67 | -3.785 | 9.223  | 4.727 | 1.00 | 0.00 |
| ATOM | 1046 | CB MET   | 67 | -4.715 | 9.444  | 2.805 | 1.00 | 0.00 |
| ATOM | 1047 | HB2 MET  | 67 | -4.205 | 10.401 | 2.695 | 1.00 | 0.00 |
| ATOM | 1048 | HB3 MET  | 67 | -4.709 | 8.918  | 1.850 | 1.00 | 0.00 |



|      |      |     |     |    |        |        |       |      |      |
|------|------|-----|-----|----|--------|--------|-------|------|------|
| ATOM | 1049 | CG  | MET | 67 | -6.163 | 9.684  | 3.247 | 1.00 | 0.00 |
| ATOM | 1050 | HG2 | MET | 67 | -6.719 | 8.748  | 3.203 | 1.00 | 0.00 |
| ATOM | 1051 | HG3 | MET | 67 | -6.176 | 10.065 | 4.268 | 1.00 | 0.00 |
| ATOM | 1052 | SD  | MET | 67 | -6.945 | 10.895 | 2.149 | 1.00 | 0.00 |
| ATOM | 1053 | CE  | MET | 67 | -5.962 | 12.333 | 2.645 | 1.00 | 0.00 |
| ATOM | 1054 | HE1 | MET | 67 | -4.908 | 12.140 | 2.444 | 1.00 | 0.00 |
| ATOM | 1055 | HE2 | MET | 67 | -6.285 | 13.207 | 2.080 | 1.00 | 0.00 |
| ATOM | 1056 | HE3 | MET | 67 | -6.100 | 12.518 | 3.710 | 1.00 | 0.00 |
| ATOM | 1057 | C   | MET | 67 | -4.902 | 7.467  | 4.323 | 1.00 | 0.00 |
| ATOM | 1058 | O   | MET | 67 | -5.440 | 7.505  | 5.430 | 1.00 | 0.00 |
| ATOM | 1059 | N   | MET | 68 | -5.089 | 6.477  | 3.457 | 1.00 | 0.00 |
| ATOM | 1060 | H   | MET | 68 | -4.654 | 6.508  | 2.546 | 1.00 | 0.00 |
| ATOM | 1061 | CA  | MET | 68 | -5.961 | 5.350  | 3.768 | 1.00 | 0.00 |
| ATOM | 1062 | HA  | MET | 68 | -6.959 | 5.702  | 4.026 | 1.00 | 0.00 |
| ATOM | 1063 | CB  | MET | 68 | -6.065 | 4.438  | 2.542 | 1.00 | 0.00 |
| ATOM | 1064 | HB2 | MET | 68 | -6.770 | 4.871  | 1.833 | 1.00 | 0.00 |
| ATOM | 1065 | HB3 | MET | 68 | -5.084 | 4.355  | 2.074 | 1.00 | 0.00 |
| ATOM | 1066 | CG  | MET | 68 | -6.551 | 3.045  | 2.959 | 1.00 | 0.00 |
| ATOM | 1067 | HG2 | MET | 68 | -5.760 | 2.526  | 3.502 | 1.00 | 0.00 |
| ATOM | 1068 | HG3 | MET | 68 | -7.429 | 3.137  | 3.598 | 1.00 | 0.00 |
| ATOM | 1069 | SD  | MET | 68 | -6.986 | 2.091  | 1.486 | 1.00 | 0.00 |
| ATOM | 1070 | CE  | MET | 68 | -5.309 | 1.895  | 0.838 | 1.00 | 0.00 |

|      |      |     |     |    |        |       |        |      |      |
|------|------|-----|-----|----|--------|-------|--------|------|------|
| ATOM | 1071 | HE1 | MET | 68 | -4.696 | 1.367 | 1.569  | 1.00 | 0.00 |
| ATOM | 1072 | HE2 | MET | 68 | -5.341 | 1.323 | -0.089 | 1.00 | 0.00 |
| ATOM | 1073 | HE3 | MET | 68 | -4.877 | 2.876 | 0.644  | 1.00 | 0.00 |
| ATOM | 1074 | C   | MET | 68 | -5.458 | 4.562 | 4.974  | 1.00 | 0.00 |
| ATOM | 1075 | O   | MET | 68 | -6.234 | 4.241 | 5.872  | 1.00 | 0.00 |
| ATOM | 1076 | N   | MET | 69 | -4.165 | 4.249 | 4.995  | 1.00 | 0.00 |
| ATOM | 1077 | H   | MET | 69 | -3.553 | 4.510 | 4.235  | 1.00 | 0.00 |
| ATOM | 1078 | CA  | MET | 69 | -3.600 | 3.493 | 6.108  | 1.00 | 0.00 |
| ATOM | 1079 | HA  | MET | 69 | -3.997 | 2.478 | 6.111  | 1.00 | 0.00 |
| ATOM | 1080 | CB  | MET | 69 | -2.075 | 3.422 | 5.972  | 1.00 | 0.00 |
| ATOM | 1081 | HB2 | MET | 69 | -1.818 | 3.027 | 4.989  | 1.00 | 0.00 |
| ATOM | 1082 | HB3 | MET | 69 | -1.655 | 4.422 | 6.082  | 1.00 | 0.00 |
| ATOM | 1083 | CG  | MET | 69 | -1.501 | 2.506 | 7.056  | 1.00 | 0.00 |
| ATOM | 1084 | HG2 | MET | 69 | -1.805 | 2.863 | 8.040  | 1.00 | 0.00 |
| ATOM | 1085 | HG3 | MET | 69 | -1.866 | 1.489 | 6.911  | 1.00 | 0.00 |
| ATOM | 1086 | SD  | MET | 69 | 0.306  | 2.509 | 6.954  | 1.00 | 0.00 |
| ATOM | 1087 | CE  | MET | 69 | 0.611  | 1.278 | 8.245  | 1.00 | 0.00 |
| ATOM | 1088 | HE1 | MET | 69 | 0.133  | 0.337 | 7.971  | 1.00 | 0.00 |
| ATOM | 1089 | HE2 | MET | 69 | 1.685  | 1.121 | 8.353  | 1.00 | 0.00 |
| ATOM | 1090 | HE3 | MET | 69 | 0.200  | 1.632 | 9.190  | 1.00 | 0.00 |
| ATOM | 1091 | C   | MET | 69 | -3.970 | 4.148 | 7.436  | 1.00 | 0.00 |
| ATOM | 1092 | O   | MET | 69 | -4.528 | 3.504 | 8.325  | 1.00 | 0.00 |

|      |      |      |     |    |        |        |       |      |      |
|------|------|------|-----|----|--------|--------|-------|------|------|
| ATOM | 1093 | N    | ARG | 70 | -3.660 | 5.435  | 7.554 | 1.00 | 0.00 |
| ATOM | 1094 | H    | ARG | 70 | -3.187 | 5.913  | 6.801 | 1.00 | 0.00 |
| ATOM | 1095 | CA   | ARG | 70 | -3.965 | 6.186  | 8.767 | 1.00 | 0.00 |
| ATOM | 1096 | HA   | ARG | 70 | -3.488 | 5.720  | 9.630 | 1.00 | 0.00 |
| ATOM | 1097 | CB   | ARG | 70 | -3.436 | 7.617  | 8.629 | 1.00 | 0.00 |
| ATOM | 1098 | HB2  | ARG | 70 | -3.875 | 8.084  | 7.748 | 1.00 | 0.00 |
| ATOM | 1099 | HB3  | ARG | 70 | -3.704 | 8.191  | 9.516 | 1.00 | 0.00 |
| ATOM | 1100 | CG   | ARG | 70 | -1.911 | 7.585  | 8.484 | 1.00 | 0.00 |
| ATOM | 1101 | HG2  | ARG | 70 | -1.473 | 7.112  | 9.363 | 1.00 | 0.00 |
| ATOM | 1102 | HG3  | ARG | 70 | -1.643 | 7.014  | 7.595 | 1.00 | 0.00 |
| ATOM | 1103 | CD   | ARG | 70 | -1.376 | 9.013  | 8.354 | 1.00 | 0.00 |
| ATOM | 1104 | HD2  | ARG | 70 | -1.944 | 9.556  | 7.599 | 1.00 | 0.00 |
| ATOM | 1105 | HD3  | ARG | 70 | -1.457 | 9.529  | 9.311 | 1.00 | 0.00 |
| ATOM | 1106 | NE   | ARG | 70 | 0.028  | 8.988  | 7.954 | 1.00 | 0.00 |
| ATOM | 1107 | HE   | ARG | 70 | 0.604  | 8.190  | 8.183 | 1.00 | 0.00 |
| ATOM | 1108 | CZ   | ARG | 70 | 0.580  | 10.001 | 7.286 | 1.00 | 0.00 |
| ATOM | 1109 | NH1  | ARG | 70 | -0.129 | 11.056 | 6.982 | 1.00 | 0.00 |
| ATOM | 1110 | HH11 | ARG | 70 | -1.100 | 11.103 | 7.255 | 1.00 | 0.00 |
| ATOM | 1111 | HH12 | ARG | 70 | 0.298  | 11.818 | 6.476 | 1.00 | 0.00 |
| ATOM | 1112 | NH2  | ARG | 70 | 1.835  | 9.940  | 6.934 | 1.00 | 0.00 |
| ATOM | 1113 | HH21 | ARG | 70 | 2.384  | 9.125  | 7.170 | 1.00 | 0.00 |
| ATOM | 1114 | HH22 | ARG | 70 | 2.253  | 10.708 | 6.428 | 1.00 | 0.00 |

|      |      |     |     |    |         |       |        |      |      |
|------|------|-----|-----|----|---------|-------|--------|------|------|
| ATOM | 1115 | C   | ARG | 70 | -5.471  | 6.221 | 9.027  | 1.00 | 0.00 |
| ATOM | 1116 | O   | ARG | 70 | -5.917  | 6.069 | 10.164 | 1.00 | 0.00 |
| ATOM | 1117 | N   | MET | 71 | -6.245  | 6.430 | 7.961  | 1.00 | 0.00 |
| ATOM | 1118 | H   | MET | 71 | -5.825  | 6.572 | 7.054  | 1.00 | 0.00 |
| ATOM | 1119 | CA  | MET | 71 | -7.697  | 6.495 | 8.069  | 1.00 | 0.00 |
| ATOM | 1120 | HA  | MET | 71 | -7.984  | 7.242 | 8.809  | 1.00 | 0.00 |
| ATOM | 1121 | CB  | MET | 71 | -8.303  | 6.886 | 6.718  | 1.00 | 0.00 |
| ATOM | 1122 | HB2 | MET | 71 | -7.787  | 7.765 | 6.331  | 1.00 | 0.00 |
| ATOM | 1123 | HB3 | MET | 71 | -8.187  | 6.059 | 6.017  | 1.00 | 0.00 |
| ATOM | 1124 | CG  | MET | 71 | -9.792  | 7.203 | 6.893  | 1.00 | 0.00 |
| ATOM | 1125 | HG2 | MET | 71 | -10.295 | 6.357 | 7.362  | 1.00 | 0.00 |
| ATOM | 1126 | HG3 | MET | 71 | -9.908  | 8.087 | 7.520  | 1.00 | 0.00 |
| ATOM | 1127 | SD  | MET | 71 | -10.540 | 7.519 | 5.274  | 1.00 | 0.00 |
| ATOM | 1128 | CE  | MET | 71 | -9.603  | 9.014 | 4.867  | 1.00 | 0.00 |
| ATOM | 1129 | HE1 | MET | 71 | -8.538  | 8.781 | 4.846  | 1.00 | 0.00 |
| ATOM | 1130 | HE2 | MET | 71 | -9.913  | 9.383 | 3.890  | 1.00 | 0.00 |
| ATOM | 1131 | HE3 | MET | 71 | -9.792  | 9.778 | 5.621  | 1.00 | 0.00 |
| ATOM | 1132 | C   | MET | 71 | -8.268  | 5.159 | 8.524  | 1.00 | 0.00 |
| ATOM | 1133 | O   | MET | 71 | -9.216  | 5.115 | 9.308  | 1.00 | 0.00 |
| ATOM | 1134 | N   | MET | 72 | -7.695  | 4.073 | 8.017  | 1.00 | 0.00 |
| ATOM | 1135 | H   | MET | 72 | -6.933  | 4.149 | 7.358  | 1.00 | 0.00 |
| ATOM | 1136 | CA  | MET | 72 | -8.169  | 2.744 | 8.373  | 1.00 | 0.00 |

|      |      |     |     |    |        |        |        |      |      |
|------|------|-----|-----|----|--------|--------|--------|------|------|
| ATOM | 1137 | HA  | MET | 72 | -9.204 | 2.619  | 8.056  | 1.00 | 0.00 |
| ATOM | 1138 | CB  | MET | 72 | -7.313 | 1.678  | 7.681  | 1.00 | 0.00 |
| ATOM | 1139 | HB2 | MET | 72 | -6.262 | 1.959  | 7.752  | 1.00 | 0.00 |
| ATOM | 1140 | HB3 | MET | 72 | -7.466 | 0.718  | 8.175  | 1.00 | 0.00 |
| ATOM | 1141 | CG  | MET | 72 | -7.712 | 1.563  | 6.207  | 1.00 | 0.00 |
| ATOM | 1142 | HG2 | MET | 72 | -7.683 | 2.547  | 5.740  | 1.00 | 0.00 |
| ATOM | 1143 | HG3 | MET | 72 | -7.022 | 0.895  | 5.690  | 1.00 | 0.00 |
| ATOM | 1144 | SD  | MET | 72 | -9.391 | 0.895  | 6.085  | 1.00 | 0.00 |
| ATOM | 1145 | CE  | MET | 72 | -9.047 | -0.729 | 6.810  | 1.00 | 0.00 |
| ATOM | 1146 | HE1 | MET | 72 | -8.671 | -0.602 | 7.826  | 1.00 | 0.00 |
| ATOM | 1147 | HE2 | MET | 72 | -9.963 | -1.319 | 6.833  | 1.00 | 0.00 |
| ATOM | 1148 | HE3 | MET | 72 | -8.298 | -1.245 | 6.209  | 1.00 | 0.00 |
| ATOM | 1149 | C   | MET | 72 | -8.122 | 2.536  | 9.881  | 1.00 | 0.00 |
| ATOM | 1150 | O   | MET | 72 | -9.137 | 2.220  | 10.505 | 1.00 | 0.00 |
| ATOM | 1151 | N   | GLN | 73 | -6.940 | 2.722  | 10.459 | 1.00 | 0.00 |
| ATOM | 1152 | H   | GLN | 73 | -6.130 | 2.958  | 9.903  | 1.00 | 0.00 |
| ATOM | 1153 | CA  | GLN | 73 | -6.767 | 2.561  | 11.897 | 1.00 | 0.00 |
| ATOM | 1154 | HA  | GLN | 73 | -7.056 | 1.553  | 12.197 | 1.00 | 0.00 |
| ATOM | 1155 | CB  | GLN | 73 | -5.301 | 2.783  | 12.278 | 1.00 | 0.00 |
| ATOM | 1156 | HB2 | GLN | 73 | -5.007 | 3.797  | 12.009 | 1.00 | 0.00 |
| ATOM | 1157 | HB3 | GLN | 73 | -5.182 | 2.644  | 13.353 | 1.00 | 0.00 |
| ATOM | 1158 | CG  | GLN | 73 | -4.415 | 1.781  | 11.533 | 1.00 | 0.00 |

|      |      |      |     |    |         |        |        |      |      |
|------|------|------|-----|----|---------|--------|--------|------|------|
| ATOM | 1159 | HG2  | GLN | 73 | -4.400  | 1.998  | 10.465 | 1.00 | 0.00 |
| ATOM | 1160 | HG3  | GLN | 73 | -3.400  | 1.833  | 11.928 | 1.00 | 0.00 |
| ATOM | 1161 | CD   | GLN | 73 | -4.943  | 0.367  | 11.735 | 1.00 | 0.00 |
| ATOM | 1162 | OE1  | GLN | 73 | -4.907  | -0.160 | 12.847 | 1.00 | 0.00 |
| ATOM | 1163 | NE2  | GLN | 73 | -5.450  | -0.274 | 10.721 | 1.00 | 0.00 |
| ATOM | 1164 | HE21 | GLN | 73 | -5.802  | -1.213 | 10.846 | 1.00 | 0.00 |
| ATOM | 1165 | HE22 | GLN | 73 | -5.488  | 0.170  | 9.815  | 1.00 | 0.00 |
| ATOM | 1166 | C    | GLN | 73 | -7.652  | 3.543  | 12.658 | 1.00 | 0.00 |
| ATOM | 1167 | O    | GLN | 73 | -8.247  | 3.199  | 13.675 | 1.00 | 0.00 |
| ATOM | 1168 | N    | GLN | 74 | -7.724  | 4.770  | 12.155 | 1.00 | 0.00 |
| ATOM | 1169 | H    | GLN | 74 | -7.189  | 5.018  | 11.335 | 1.00 | 0.00 |
| ATOM | 1170 | CA   | GLN | 74 | -8.529  | 5.804  | 12.794 | 1.00 | 0.00 |
| ATOM | 1171 | HA   | GLN | 74 | -8.219  | 5.935  | 13.831 | 1.00 | 0.00 |
| ATOM | 1172 | CB   | GLN | 74 | -8.342  | 7.133  | 12.055 | 1.00 | 0.00 |
| ATOM | 1173 | HB2  | GLN | 74 | -7.405  | 7.594  | 12.368 | 1.00 | 0.00 |
| ATOM | 1174 | HB3  | GLN | 74 | -8.315  | 6.950  | 10.981 | 1.00 | 0.00 |
| ATOM | 1175 | CG   | GLN | 74 | -9.506  | 8.070  | 12.384 | 1.00 | 0.00 |
| ATOM | 1176 | HG2  | GLN | 74 | -10.048 | 7.707  | 13.258 | 1.00 | 0.00 |
| ATOM | 1177 | HG3  | GLN | 74 | -9.130  | 9.074  | 12.582 | 1.00 | 0.00 |
| ATOM | 1178 | CD   | GLN | 74 | -10.469 | 8.134  | 11.205 | 1.00 | 0.00 |
| ATOM | 1179 | OE1  | GLN | 74 | -10.499 | 7.148  | 10.354 | 1.00 | 0.00 |
| ATOM | 1180 | NE2  | GLN | 74 | -11.214 | 9.103  | 11.059 | 1.00 | 0.00 |

|      |      |      |     |    |         |       |        |      |      |
|------|------|------|-----|----|---------|-------|--------|------|------|
| ATOM | 1181 | HE21 | GLN | 74 | -11.848 | 9.134 | 10.274 | 1.00 | 0.00 |
| ATOM | 1182 | HE22 | GLN | 74 | -11.187 | 9.861 | 11.726 | 1.00 | 0.00 |
| ATOM | 1183 | C    | GLN | 74 | -10.009 | 5.426 | 12.830 | 1.00 | 0.00 |
| ATOM | 1184 | O    | GLN | 74 | -10.679 | 5.617 | 13.846 | 1.00 | 0.00 |
| ATOM | 1185 | N    | LYS | 75 | -10.514 | 4.904 | 11.719 | 1.00 | 0.00 |
| ATOM | 1186 | H    | LYS | 75 | -9.935  | 4.775 | 10.901 | 1.00 | 0.00 |
| ATOM | 1187 | CA   | LYS | 75 | -11.921 | 4.526 | 11.638 | 1.00 | 0.00 |
| ATOM | 1188 | HA   | LYS | 75 | -12.555 | 5.397 | 11.803 | 1.00 | 0.00 |
| ATOM | 1189 | CB   | LYS | 75 | -12.221 | 3.957 | 10.248 | 1.00 | 0.00 |
| ATOM | 1190 | HB2  | LYS | 75 | -11.889 | 4.666 | 9.490  | 1.00 | 0.00 |
| ATOM | 1191 | HB3  | LYS | 75 | -11.687 | 3.015 | 10.122 | 1.00 | 0.00 |
| ATOM | 1192 | CG   | LYS | 75 | -13.728 | 3.715 | 10.097 | 1.00 | 0.00 |
| ATOM | 1193 | HG2  | LYS | 75 | -13.904 | 3.058 | 9.245  | 1.00 | 0.00 |
| ATOM | 1194 | HG3  | LYS | 75 | -14.110 | 3.244 | 11.003 | 1.00 | 0.00 |
| ATOM | 1195 | CD   | LYS | 75 | -14.449 | 5.048 | 9.871  | 1.00 | 0.00 |
| ATOM | 1196 | HD2  | LYS | 75 | -14.331 | 5.678 | 10.753 | 1.00 | 0.00 |
| ATOM | 1197 | HD3  | LYS | 75 | -14.019 | 5.551 | 9.005  | 1.00 | 0.00 |
| ATOM | 1198 | CE   | LYS | 75 | -15.937 | 4.790 | 9.624  | 1.00 | 0.00 |
| ATOM | 1199 | HE2  | LYS | 75 | -16.326 | 4.136 | 10.404 | 1.00 | 0.00 |
| ATOM | 1200 | HE3  | LYS | 75 | -16.477 | 5.736 | 9.641  | 1.00 | 0.00 |
| ATOM | 1201 | NZ   | LYS | 75 | -16.116 | 4.139 | 8.295  | 1.00 | 0.00 |
| ATOM | 1202 | HZ1  | LYS | 75 | -15.615 | 3.261 | 8.280  | 1.00 | 0.00 |

|      |      |     |     |    |         |        |        |      |      |
|------|------|-----|-----|----|---------|--------|--------|------|------|
| ATOM | 1203 | HZ2 | LYS | 75 | -17.098 | 3.969  | 8.133  | 1.00 | 0.00 |
| ATOM | 1204 | HZ3 | LYS | 75 | -15.755 | 4.745  | 7.572  | 1.00 | 0.00 |
| ATOM | 1205 | C   | LYS | 75 | -12.269 | 3.489  | 12.702 | 1.00 | 0.00 |
| ATOM | 1206 | O   | LYS | 75 | -13.324 | 3.563  | 13.334 | 1.00 | 0.00 |
| ATOM | 1207 | N   | GLU | 76 | -11.375 | 2.528  | 12.889 | 1.00 | 0.00 |
| ATOM | 1208 | H   | GLU | 76 | -10.533 | 2.495  | 12.331 | 1.00 | 0.00 |
| ATOM | 1209 | CA  | GLU | 76 | -11.592 | 1.473  | 13.878 | 1.00 | 0.00 |
| ATOM | 1210 | HA  | GLU | 76 | -11.906 | 1.907  | 14.827 | 1.00 | 0.00 |
| ATOM | 1211 | CB  | GLU | 76 | -12.689 | 0.517  | 13.389 | 1.00 | 0.00 |
| ATOM | 1212 | HB2 | GLU | 76 | -13.560 | 1.095  | 13.082 | 1.00 | 0.00 |
| ATOM | 1213 | HB3 | GLU | 76 | -12.316 | -0.056 | 12.540 | 1.00 | 0.00 |
| ATOM | 1214 | CG  | GLU | 76 | -13.085 | -0.444 | 14.520 | 1.00 | 0.00 |
| ATOM | 1215 | HG2 | GLU | 76 | -13.749 | -1.209 | 14.117 | 1.00 | 0.00 |
| ATOM | 1216 | HG3 | GLU | 76 | -12.185 | -0.916 | 14.915 | 1.00 | 0.00 |
| ATOM | 1217 | CD  | GLU | 76 | -13.799 | 0.310  | 15.643 | 1.00 | 0.00 |
| ATOM | 1218 | OE1 | GLU | 76 | -14.417 | 1.326  | 15.360 | 1.00 | 0.00 |
| ATOM | 1219 | OE2 | GLU | 76 | -13.717 | -0.140 | 16.774 | 1.00 | 0.00 |
| ATOM | 1220 | C   | GLU | 76 | -10.301 | 0.697  | 14.130 | 1.00 | 0.00 |
| ATOM | 1221 | O   | GLU | 76 | -10.144 | -0.430 | 13.656 | 1.00 | 0.00 |
| ATOM | 1222 | N   | MET | 77 | -9.376  | 1.306  | 14.865 | 1.00 | 0.00 |
| ATOM | 1223 | H   | MET | 77 | -9.531  | 2.241  | 15.213 | 1.00 | 0.00 |
| ATOM | 1224 | CA  | MET | 77 | -8.100  | 0.660  | 15.163 | 1.00 | 0.00 |



|      |      |     |     |    |        |        |        |      |      |
|------|------|-----|-----|----|--------|--------|--------|------|------|
| ATOM | 1225 | HA  | MET | 77 | -7.548 | 0.479  | 14.241 | 1.00 | 0.00 |
| ATOM | 1226 | CB  | MET | 77 | -7.255 | 1.562  | 16.071 | 1.00 | 0.00 |
| ATOM | 1227 | HB2 | MET | 77 | -7.189 | 2.557  | 15.632 | 1.00 | 0.00 |
| ATOM | 1228 | HB3 | MET | 77 | -7.724 | 1.629  | 17.053 | 1.00 | 0.00 |
| ATOM | 1229 | CG  | MET | 77 | -5.848 | 0.975  | 16.218 | 1.00 | 0.00 |
| ATOM | 1230 | HG2 | MET | 77 | -5.911 | -0.044 | 16.600 | 1.00 | 0.00 |
| ATOM | 1231 | HG3 | MET | 77 | -5.348 | 0.968  | 15.250 | 1.00 | 0.00 |
| ATOM | 1232 | SD  | MET | 77 | -4.891 | 1.985  | 17.374 | 1.00 | 0.00 |
| ATOM | 1233 | CE  | MET | 77 | -3.322 | 1.099  | 17.208 | 1.00 | 0.00 |
| ATOM | 1234 | HE1 | MET | 77 | -2.989 | 1.140  | 16.171 | 1.00 | 0.00 |
| ATOM | 1235 | HE2 | MET | 77 | -2.572 | 1.563  | 17.849 | 1.00 | 0.00 |
| ATOM | 1236 | HE3 | MET | 77 | -3.458 | 0.059  | 17.505 | 1.00 | 0.00 |
| ATOM | 1237 | C   | MET | 77 | -8.318 | -0.693 | 15.840 | 1.00 | 0.00 |
| ATOM | 1238 | O   | MET | 77 | -8.431 | -0.769 | 17.065 | 1.00 | 0.00 |
| ATOM | 1239 | N   | GLN | 78 | -8.362 | -1.757 | 15.041 | 1.00 | 0.00 |
| ATOM | 1240 | H   | GLN | 78 | -8.281 | -1.652 | 14.040 | 1.00 | 0.00 |
| ATOM | 1241 | CA  | GLN | 78 | -8.547 | -3.100 | 15.583 | 1.00 | 0.00 |
| ATOM | 1242 | HA  | GLN | 78 | -9.533 | -3.186 | 16.040 | 1.00 | 0.00 |
| ATOM | 1243 | CB  | GLN | 78 | -8.434 | -4.141 | 14.462 | 1.00 | 0.00 |
| ATOM | 1244 | HB2 | GLN | 78 | -8.010 | -3.672 | 13.574 | 1.00 | 0.00 |
| ATOM | 1245 | HB3 | GLN | 78 | -7.785 | -4.955 | 14.788 | 1.00 | 0.00 |
| ATOM | 1246 | CG  | GLN | 78 | -9.823 | -4.697 | 14.132 | 1.00 | 0.00 |

|      |      |      |     |    |         |        |        |      |      |
|------|------|------|-----|----|---------|--------|--------|------|------|
| ATOM | 1247 | HG2  | GLN | 78 | -10.270 | -5.137 | 15.024 | 1.00 | 0.00 |
| ATOM | 1248 | HG3  | GLN | 78 | -10.465 | -3.899 | 13.761 | 1.00 | 0.00 |
| ATOM | 1249 | CD   | GLN | 78 | -9.714  | -5.776 | 13.057 | 1.00 | 0.00 |
| ATOM | 1250 | OE1  | GLN | 78 | -8.902  | -6.694 | 13.176 | 1.00 | 0.00 |
| ATOM | 1251 | NE2  | GLN | 78 | -10.489 | -5.720 | 12.008 | 1.00 | 0.00 |
| ATOM | 1252 | HE21 | GLN | 78 | -10.420 | -6.432 | 11.295 | 1.00 | 0.00 |
| ATOM | 1253 | HE22 | GLN | 78 | -11.153 | -4.966 | 11.915 | 1.00 | 0.00 |
| ATOM | 1254 | C    | GLN | 78 | -7.488  | -3.372 | 16.652 | 1.00 | 0.00 |
| ATOM | 1255 | O    | GLN | 78 | -6.309  | -3.082 | 16.441 | 1.00 | 0.00 |
| ATOM | 1256 | N    | PRO | 79 | -7.868  | -3.912 | 17.784 | 1.00 | 0.00 |
| ATOM | 1257 | CD   | PRO | 79 | -9.231  | -4.307 | 18.158 | 1.00 | 0.00 |
| ATOM | 1258 | HD2  | PRO | 79 | -9.509  | -5.204 | 17.604 | 1.00 | 0.00 |
| ATOM | 1259 | HD3  | PRO | 79 | -9.919  | -3.499 | 17.911 | 1.00 | 0.00 |
| ATOM | 1260 | CG   | PRO | 79 | -9.137  | -4.554 | 19.672 | 1.00 | 0.00 |
| ATOM | 1261 | HG2  | PRO | 79 | -9.250  | -5.621 | 19.865 | 1.00 | 0.00 |
| ATOM | 1262 | HG3  | PRO | 79 | -9.937  | -4.008 | 20.171 | 1.00 | 0.00 |
| ATOM | 1263 | CB   | PRO | 79 | -7.799  | -4.059 | 20.113 | 1.00 | 0.00 |
| ATOM | 1264 | HB2  | PRO | 79 | -7.441  | -4.719 | 20.904 | 1.00 | 0.00 |
| ATOM | 1265 | HB3  | PRO | 79 | -7.777  | -3.028 | 20.464 | 1.00 | 0.00 |
| ATOM | 1266 | CA   | PRO | 79 | -6.920  | -4.206 | 18.880 | 1.00 | 0.00 |
| ATOM | 1267 | HA   | PRO | 79 | -6.099  | -3.491 | 18.829 | 1.00 | 0.00 |
| ATOM | 1268 | C    | PRO | 79 | -6.367  | -5.619 | 18.775 | 1.00 | 0.00 |

|      |      |      |     |    |         |         |        |      |      |
|------|------|------|-----|----|---------|---------|--------|------|------|
| ATOM | 1269 | O    | PRO | 79 | -7.087  | -6.601  | 18.964 | 1.00 | 0.00 |
| ATOM | 1270 | N    | ARG | 80 | -5.085  | -5.701  | 18.485 | 1.00 | 0.00 |
| ATOM | 1271 | H    | ARG | 80 | -4.550  | -4.860  | 18.321 | 1.00 | 0.00 |
| ATOM | 1272 | CA   | ARG | 80 | -4.409  | -6.983  | 18.363 | 1.00 | 0.00 |
| ATOM | 1273 | HA   | ARG | 80 | -4.532  | -7.554  | 19.284 | 1.00 | 0.00 |
| ATOM | 1274 | CB   | ARG | 80 | -4.996  | -7.791  | 17.204 | 1.00 | 0.00 |
| ATOM | 1275 | HB2  | ARG | 80 | -5.700  | -7.173  | 16.648 | 1.00 | 0.00 |
| ATOM | 1276 | HB3  | ARG | 80 | -4.193  | -8.114  | 16.541 | 1.00 | 0.00 |
| ATOM | 1277 | CG   | ARG | 80 | -5.723  | -9.019  | 17.759 | 1.00 | 0.00 |
| ATOM | 1278 | HG2  | ARG | 80 | -5.009  | -9.831  | 17.896 | 1.00 | 0.00 |
| ATOM | 1279 | HG3  | ARG | 80 | -6.176  | -8.769  | 18.719 | 1.00 | 0.00 |
| ATOM | 1280 | CD   | ARG | 80 | -6.812  | -9.458  | 16.781 | 1.00 | 0.00 |
| ATOM | 1281 | HD2  | ARG | 80 | -6.655  | -8.982  | 15.813 | 1.00 | 0.00 |
| ATOM | 1282 | HD3  | ARG | 80 | -6.787  | -10.541 | 16.661 | 1.00 | 0.00 |
| ATOM | 1283 | NE   | ARG | 80 | -8.129  | -9.072  | 17.285 | 1.00 | 0.00 |
| ATOM | 1284 | HE   | ARG | 80 | -8.597  | -9.659  | 17.962 | 1.00 | 0.00 |
| ATOM | 1285 | CZ   | ARG | 80 | -8.740  | -7.960  | 16.876 | 1.00 | 0.00 |
| ATOM | 1286 | NH1  | ARG | 80 | -8.164  | -7.168  | 16.012 | 1.00 | 0.00 |
| ATOM | 1287 | HH11 | ARG | 80 | -7.249  | -7.400  | 15.651 | 1.00 | 0.00 |
| ATOM | 1288 | HH12 | ARG | 80 | -8.635  | -6.328  | 15.709 | 1.00 | 0.00 |
| ATOM | 1289 | NH2  | ARG | 80 | -9.920  | -7.661  | 17.343 | 1.00 | 0.00 |
| ATOM | 1290 | HH21 | ARG | 80 | -10.365 | -8.273  | 18.012 | 1.00 | 0.00 |

|      |      |      |     |    |         |         |        |      |      |
|------|------|------|-----|----|---------|---------|--------|------|------|
| ATOM | 1291 | HH22 | ARG | 80 | -10.383 | -6.819  | 17.034 | 1.00 | 0.00 |
| ATOM | 1292 | C    | ARG | 80 | -2.919  | -6.764  | 18.137 | 1.00 | 0.00 |
| ATOM | 1293 | O    | ARG | 80 | -2.530  | -6.016  | 17.239 | 1.00 | 0.00 |
| ATOM | 1294 | N    | GLY | 81 | -2.087  | -7.407  | 18.949 | 1.00 | 0.00 |
| ATOM | 1295 | H    | GLY | 81 | -2.428  | -8.017  | 19.679 | 1.00 | 0.00 |
| ATOM | 1296 | CA   | GLY | 81 | -0.648  | -7.245  | 18.803 | 1.00 | 0.00 |
| ATOM | 1297 | HA2  | GLY | 81 | -0.445  | -6.249  | 18.411 | 1.00 | 0.00 |
| ATOM | 1298 | HA3  | GLY | 81 | -0.182  | -7.351  | 19.783 | 1.00 | 0.00 |
| ATOM | 1299 | C    | GLY | 81 | -0.052  | -8.283  | 17.855 | 1.00 | 0.00 |
| ATOM | 1300 | O    | GLY | 81 | 0.326   | -7.960  | 16.732 | 1.00 | 0.00 |
| ATOM | 1301 | N    | GLU | 82 | 0.042   | -9.523  | 18.325 | 1.00 | 0.00 |
| ATOM | 1302 | H    | GLU | 82 | -0.258  | -9.730  | 19.267 | 1.00 | 0.00 |
| ATOM | 1303 | CA   | GLU | 82 | 0.617   | -10.607 | 17.527 | 1.00 | 0.00 |
| ATOM | 1304 | HA   | GLU | 82 | 1.624   | -10.343 | 17.203 | 1.00 | 0.00 |
| ATOM | 1305 | CB   | GLU | 82 | 0.693   | -11.884 | 18.370 | 1.00 | 0.00 |
| ATOM | 1306 | HB2  | GLU | 82 | -0.291  | -12.102 | 18.785 | 1.00 | 0.00 |
| ATOM | 1307 | HB3  | GLU | 82 | 1.013   | -12.714 | 17.740 | 1.00 | 0.00 |
| ATOM | 1308 | CG   | GLU | 82 | 1.700   | -11.693 | 19.514 | 1.00 | 0.00 |
| ATOM | 1309 | HG2  | GLU | 82 | 1.992   | -12.673 | 19.892 | 1.00 | 0.00 |
| ATOM | 1310 | HG3  | GLU | 82 | 2.579   | -11.178 | 19.126 | 1.00 | 0.00 |
| ATOM | 1311 | CD   | GLU | 82 | 1.086   | -10.870 | 20.650 | 1.00 | 0.00 |
| ATOM | 1312 | OE1  | GLU | 82 | -0.127  | -10.891 | 20.795 | 1.00 | 0.00 |

|      |      |      |     |    |        |         |        |      |      |
|------|------|------|-----|----|--------|---------|--------|------|------|
| ATOM | 1313 | OE2  | GLU | 82 | 1.842  | -10.228 | 21.361 | 1.00 | 0.00 |
| ATOM | 1314 | C    | GLU | 82 | -0.174 | -10.895 | 16.249 | 1.00 | 0.00 |
| ATOM | 1315 | O    | GLU | 82 | 0.414  | -11.097 | 15.186 | 1.00 | 0.00 |
| ATOM | 1316 | N    | GLN | 83 | -1.500 | -10.954 | 16.359 | 1.00 | 0.00 |
| ATOM | 1317 | H    | GLN | 83 | -1.949 | -10.811 | 17.252 | 1.00 | 0.00 |
| ATOM | 1318 | CA   | GLN | 83 | -2.340 | -11.267 | 15.202 | 1.00 | 0.00 |
| ATOM | 1319 | HA   | GLN | 83 | -2.071 | -12.242 | 14.794 | 1.00 | 0.00 |
| ATOM | 1320 | CB   | GLN | 83 | -3.812 | -11.303 | 15.629 | 1.00 | 0.00 |
| ATOM | 1321 | HB2  | GLN | 83 | -3.922 | -11.969 | 16.485 | 1.00 | 0.00 |
| ATOM | 1322 | HB3  | GLN | 83 | -4.131 | -10.299 | 15.908 | 1.00 | 0.00 |
| ATOM | 1323 | CG   | GLN | 83 | -4.678 | -11.811 | 14.472 | 1.00 | 0.00 |
| ATOM | 1324 | HG2  | GLN | 83 | -5.731 | -11.632 | 14.688 | 1.00 | 0.00 |
| ATOM | 1325 | HG3  | GLN | 83 | -4.404 | -11.298 | 13.550 | 1.00 | 0.00 |
| ATOM | 1326 | CD   | GLN | 83 | -4.468 | -13.310 | 14.277 | 1.00 | 0.00 |
| ATOM | 1327 | OE1  | GLN | 83 | -4.863 | -14.108 | 15.126 | 1.00 | 0.00 |
| ATOM | 1328 | NE2  | GLN | 83 | -3.867 | -13.741 | 13.202 | 1.00 | 0.00 |
| ATOM | 1329 | HE21 | GLN | 83 | -3.726 | -14.733 | 13.069 | 1.00 | 0.00 |
| ATOM | 1330 | HE22 | GLN | 83 | -3.545 | -13.082 | 12.508 | 1.00 | 0.00 |
| ATOM | 1331 | C    | GLN | 83 | -2.162 | -10.254 | 14.068 | 1.00 | 0.00 |
| ATOM | 1332 | O    | GLN | 83 | -1.689 | -10.600 | 12.986 | 1.00 | 0.00 |
| ATOM | 1333 | N    | MET | 84 | -2.554 | -9.009  | 14.323 | 1.00 | 0.00 |
| ATOM | 1334 | H    | MET | 84 | -2.996 | -8.787  | 15.204 | 1.00 | 0.00 |

|      |      |     |     |    |        |        |        |      |      |
|------|------|-----|-----|----|--------|--------|--------|------|------|
| ATOM | 1335 | CA  | MET | 84 | -2.444 | -7.955 | 13.317 | 1.00 | 0.00 |
| ATOM | 1336 | HA  | MET | 84 | -2.938 | -8.267 | 12.397 | 1.00 | 0.00 |
| ATOM | 1337 | CB  | MET | 84 | -3.109 | -6.673 | 13.818 | 1.00 | 0.00 |
| ATOM | 1338 | HB2 | MET | 84 | -2.848 | -6.511 | 14.864 | 1.00 | 0.00 |
| ATOM | 1339 | HB3 | MET | 84 | -2.766 | -5.827 | 13.223 | 1.00 | 0.00 |
| ATOM | 1340 | CG  | MET | 84 | -4.633 | -6.807 | 13.686 | 1.00 | 0.00 |
| ATOM | 1341 | HG2 | MET | 84 | -4.900 | -6.973 | 12.643 | 1.00 | 0.00 |
| ATOM | 1342 | HG3 | MET | 84 | -4.983 | -7.646 | 14.288 | 1.00 | 0.00 |
| ATOM | 1343 | SD  | MET | 84 | -5.423 | -5.286 | 14.268 | 1.00 | 0.00 |
| ATOM | 1344 | CE  | MET | 84 | -4.943 | -4.224 | 12.883 | 1.00 | 0.00 |
| ATOM | 1345 | HE1 | MET | 84 | -5.348 | -4.630 | 11.956 | 1.00 | 0.00 |
| ATOM | 1346 | HE2 | MET | 84 | -5.335 | -3.220 | 13.042 | 1.00 | 0.00 |
| ATOM | 1347 | HE3 | MET | 84 | -3.856 | -4.183 | 12.816 | 1.00 | 0.00 |
| ATOM | 1348 | C   | MET | 84 | -0.995 | -7.692 | 12.909 | 1.00 | 0.00 |
| ATOM | 1349 | O   | MET | 84 | -0.737 | -7.295 | 11.774 | 1.00 | 0.00 |
| ATOM | 1350 | N   | ARG | 85 | -0.048 | -7.907 | 13.823 | 1.00 | 0.00 |
| ATOM | 1351 | H   | ARG | 85 | -0.276 | -8.213 | 14.758 | 1.00 | 0.00 |
| ATOM | 1352 | CA  | ARG | 85 | 1.359  | -7.675 | 13.493 | 1.00 | 0.00 |
| ATOM | 1353 | HA  | ARG | 85 | 1.534  | -6.610 | 13.344 | 1.00 | 0.00 |
| ATOM | 1354 | CB  | ARG | 85 | 2.262  | -8.164 | 14.631 | 1.00 | 0.00 |
| ATOM | 1355 | HB2 | ARG | 85 | 2.031  | -7.607 | 15.539 | 1.00 | 0.00 |
| ATOM | 1356 | HB3 | ARG | 85 | 2.083  | -9.226 | 14.802 | 1.00 | 0.00 |

|      |      |      |     |    |       |         |        |      |      |
|------|------|------|-----|----|-------|---------|--------|------|------|
| ATOM | 1357 | CG   | ARG | 85 | 3.733 | -7.948  | 14.261 | 1.00 | 0.00 |
| ATOM | 1358 | HG2  | ARG | 85 | 3.988 | -8.566  | 13.400 | 1.00 | 0.00 |
| ATOM | 1359 | HG3  | ARG | 85 | 3.898 | -6.899  | 14.017 | 1.00 | 0.00 |
| ATOM | 1360 | CD   | ARG | 85 | 4.616 | -8.340  | 15.448 | 1.00 | 0.00 |
| ATOM | 1361 | HD2  | ARG | 85 | 5.655 | -8.085  | 15.239 | 1.00 | 0.00 |
| ATOM | 1362 | HD3  | ARG | 85 | 4.287 | -7.816  | 16.346 | 1.00 | 0.00 |
| ATOM | 1363 | NE   | ARG | 85 | 4.527 | -9.779  | 15.687 | 1.00 | 0.00 |
| ATOM | 1364 | HE   | ARG | 85 | 4.540 | -10.419 | 14.906 | 1.00 | 0.00 |
| ATOM | 1365 | CZ   | ARG | 85 | 4.424 | -10.281 | 16.918 | 1.00 | 0.00 |
| ATOM | 1366 | NH1  | ARG | 85 | 4.413 | -9.491  | 17.959 | 1.00 | 0.00 |
| ATOM | 1367 | HH11 | ARG | 85 | 4.483 | -8.492  | 17.832 | 1.00 | 0.00 |
| ATOM | 1368 | HH12 | ARG | 85 | 4.335 | -9.884  | 18.887 | 1.00 | 0.00 |
| ATOM | 1369 | NH2  | ARG | 85 | 4.338 | -11.572 | 17.085 | 1.00 | 0.00 |
| ATOM | 1370 | HH21 | ARG | 85 | 4.350 | -12.184 | 16.282 | 1.00 | 0.00 |
| ATOM | 1371 | HH22 | ARG | 85 | 4.260 | -11.954 | 18.017 | 1.00 | 0.00 |
| ATOM | 1372 | C    | ARG | 85 | 1.715 | -8.405  | 12.201 | 1.00 | 0.00 |
| ATOM | 1373 | O    | ARG | 85 | 2.339 | -7.834  | 11.307 | 1.00 | 0.00 |
| ATOM | 1374 | N    | ARG | 86 | 1.288 | -9.661  | 12.103 | 1.00 | 0.00 |
| ATOM | 1375 | H    | ARG | 86 | 0.795 | -10.096 | 12.870 | 1.00 | 0.00 |
| ATOM | 1376 | CA   | ARG | 86 | 1.539 | -10.453 | 10.905 | 1.00 | 0.00 |
| ATOM | 1377 | HA   | ARG | 86 | 2.611 | -10.522 | 10.719 | 1.00 | 0.00 |
| ATOM | 1378 | CB   | ARG | 86 | 0.983 | -11.867 | 11.092 | 1.00 | 0.00 |

|      |      |          |    |        |         |        |      |      |
|------|------|----------|----|--------|---------|--------|------|------|
| ATOM | 1379 | HB2 ARG  | 86 | -0.081 | -11.813 | 11.320 | 1.00 | 0.00 |
| ATOM | 1380 | HB3 ARG  | 86 | 1.130  | -12.440 | 10.177 | 1.00 | 0.00 |
| ATOM | 1381 | CG ARG   | 86 | 1.718  | -12.554 | 12.247 | 1.00 | 0.00 |
| ATOM | 1382 | HG2 ARG  | 86 | 2.787  | -12.572 | 12.034 | 1.00 | 0.00 |
| ATOM | 1383 | HG3 ARG  | 86 | 1.541  | -11.999 | 13.168 | 1.00 | 0.00 |
| ATOM | 1384 | CD ARG   | 86 | 1.207  | -13.986 | 12.410 | 1.00 | 0.00 |
| ATOM | 1385 | HD2 ARG  | 86 | 0.119  | -13.988 | 12.464 | 1.00 | 0.00 |
| ATOM | 1386 | HD3 ARG  | 86 | 1.530  | -14.594 | 11.565 | 1.00 | 0.00 |
| ATOM | 1387 | NE ARG   | 86 | 1.737  | -14.573 | 13.637 | 1.00 | 0.00 |
| ATOM | 1388 | HE ARG   | 86 | 2.465  | -14.097 | 14.151 | 1.00 | 0.00 |
| ATOM | 1389 | CZ ARG   | 86 | 1.281  | -15.732 | 14.107 | 1.00 | 0.00 |
| ATOM | 1390 | NH1 ARG  | 86 | 0.344  | -16.379 | 13.467 | 1.00 | 0.00 |
| ATOM | 1391 | HH11 ARG | 86 | -0.035 | -15.998 | 12.612 | 1.00 | 0.00 |
| ATOM | 1392 | HH12 ARG | 86 | 0.004  | -17.258 | 13.830 | 1.00 | 0.00 |
| ATOM | 1393 | NH2 ARG  | 86 | 1.774  | -16.225 | 15.209 | 1.00 | 0.00 |
| ATOM | 1394 | HH21 ARG | 86 | 2.501  | -15.725 | 15.702 | 1.00 | 0.00 |
| ATOM | 1395 | HH22 ARG | 86 | 1.428  | -17.105 | 15.565 | 1.00 | 0.00 |
| ATOM | 1396 | C ARG    | 86 | 0.883  | -9.790  | 9.695  | 1.00 | 0.00 |
| ATOM | 1397 | O ARG    | 86 | 1.437  | -9.782  | 8.595  | 1.00 | 0.00 |
| ATOM | 1398 | N MET    | 87 | -0.309 | -9.234  | 9.923  | 1.00 | 0.00 |
| ATOM | 1399 | H MET    | 87 | -0.717 | -9.286  | 10.846 | 1.00 | 0.00 |
| ATOM | 1400 | CA MET   | 87 | -1.064 | -8.561  | 8.868  | 1.00 | 0.00 |



|      |      |     |     |    |        |        |        |      |      |
|------|------|-----|-----|----|--------|--------|--------|------|------|
| ATOM | 1401 | HA  | MET | 87 | -1.340 | -9.276 | 8.093  | 1.00 | 0.00 |
| ATOM | 1402 | CB  | MET | 87 | -2.344 | -7.949 | 9.448  | 1.00 | 0.00 |
| ATOM | 1403 | HB2 | MET | 87 | -2.867 | -8.701 | 10.039 | 1.00 | 0.00 |
| ATOM | 1404 | HB3 | MET | 87 | -2.083 | -7.104 | 10.085 | 1.00 | 0.00 |
| ATOM | 1405 | CG  | MET | 87 | -3.252 | -7.471 | 8.310  | 1.00 | 0.00 |
| ATOM | 1406 | HG2 | MET | 87 | -2.644 | -7.059 | 7.505  | 1.00 | 0.00 |
| ATOM | 1407 | HG3 | MET | 87 | -3.836 | -8.310 | 7.931  | 1.00 | 0.00 |
| ATOM | 1408 | SD  | MET | 87 | -4.377 | -6.190 | 8.923  | 1.00 | 0.00 |
| ATOM | 1409 | CE  | MET | 87 | -5.412 | -7.245 | 9.966  | 1.00 | 0.00 |
| ATOM | 1410 | HE1 | MET | 87 | -4.795 | -7.718 | 10.731 | 1.00 | 0.00 |
| ATOM | 1411 | HE2 | MET | 87 | -6.182 | -6.640 | 10.445 | 1.00 | 0.00 |
| ATOM | 1412 | HE3 | MET | 87 | -5.882 | -8.014 | 9.353  | 1.00 | 0.00 |
| ATOM | 1413 | C   | MET | 87 | -0.239 | -7.456 | 8.213  | 1.00 | 0.00 |
| ATOM | 1414 | O   | MET | 87 | -0.428 | -7.153 | 7.037  | 1.00 | 0.00 |
| ATOM | 1415 | N   | MET | 88 | 0.659  | -6.840 | 8.982  | 1.00 | 0.00 |
| ATOM | 1416 | H   | MET | 88 | 0.782  | -7.109 | 9.948  | 1.00 | 0.00 |
| ATOM | 1417 | CA  | MET | 88 | 1.479  | -5.752 | 8.457  | 1.00 | 0.00 |
| ATOM | 1418 | HA  | MET | 88 | 0.873  | -4.860 | 8.303  | 1.00 | 0.00 |
| ATOM | 1419 | CB  | MET | 88 | 2.585  | -5.424 | 9.460  | 1.00 | 0.00 |
| ATOM | 1420 | HB2 | MET | 88 | 3.137  | -6.333 | 9.701  | 1.00 | 0.00 |
| ATOM | 1421 | HB3 | MET | 88 | 3.265  | -4.693 | 9.023  | 1.00 | 0.00 |
| ATOM | 1422 | CG  | MET | 88 | 1.968  | -4.847 | 10.740 | 1.00 | 0.00 |

|      |      |         |    |       |        |        |      |      |
|------|------|---------|----|-------|--------|--------|------|------|
| ATOM | 1423 | HG2 MET | 88 | 1.668 | -3.813 | 10.570 | 1.00 | 0.00 |
| ATOM | 1424 | HG3 MET | 88 | 1.096 | -5.436 | 11.026 | 1.00 | 0.00 |
| ATOM | 1425 | SD MET  | 88 | 3.187 | -4.901 | 12.078 | 1.00 | 0.00 |
| ATOM | 1426 | CE MET  | 88 | 4.616 | -4.351 | 11.116 | 1.00 | 0.00 |
| ATOM | 1427 | HE1 MET | 88 | 4.421 | -3.359 | 10.709 | 1.00 | 0.00 |
| ATOM | 1428 | HE2 MET | 88 | 5.495 | -4.312 | 11.760 | 1.00 | 0.00 |
| ATOM | 1429 | HE3 MET | 88 | 4.796 | -5.050 | 10.299 | 1.00 | 0.00 |
| ATOM | 1430 | C MET   | 88 | 2.105 | -6.139 | 7.122  | 1.00 | 0.00 |
| ATOM | 1431 | O MET   | 88 | 1.966 | -5.419 | 6.133  | 1.00 | 0.00 |
| ATOM | 1432 | N ARG   | 89 | 2.776 | -7.286 | 7.093  | 1.00 | 0.00 |
| ATOM | 1433 | H ARG   | 89 | 2.887 | -7.842 | 7.929  | 1.00 | 0.00 |
| ATOM | 1434 | CA ARG  | 89 | 3.396 | -7.759 | 5.862  | 1.00 | 0.00 |
| ATOM | 1435 | HA ARG  | 89 | 4.120 | -7.027 | 5.503  | 1.00 | 0.00 |
| ATOM | 1436 | CB ARG  | 89 | 4.124 | -9.083 | 6.116  | 1.00 | 0.00 |
| ATOM | 1437 | HB2 ARG | 89 | 3.419 | -9.814 | 6.512  | 1.00 | 0.00 |
| ATOM | 1438 | HB3 ARG | 89 | 4.542 | -9.452 | 5.180  | 1.00 | 0.00 |
| ATOM | 1439 | CG ARG  | 89 | 5.255 | -8.864 | 7.129  | 1.00 | 0.00 |
| ATOM | 1440 | HG2 ARG | 89 | 4.863 | -8.342 | 8.002  | 1.00 | 0.00 |
| ATOM | 1441 | HG3 ARG | 89 | 5.659 | -9.829 | 7.435  | 1.00 | 0.00 |
| ATOM | 1442 | CD ARG  | 89 | 6.366 | -8.025 | 6.489  | 1.00 | 0.00 |
| ATOM | 1443 | HD2 ARG | 89 | 6.717 | -8.510 | 5.578  | 1.00 | 0.00 |
| ATOM | 1444 | HD3 ARG | 89 | 5.987 | -7.032 | 6.249  | 1.00 | 0.00 |

|      |      |      |     |    |        |         |       |      |      |
|------|------|------|-----|----|--------|---------|-------|------|------|
| ATOM | 1445 | NE   | ARG | 89 | 7.491  | -7.886  | 7.408 | 1.00 | 0.00 |
| ATOM | 1446 | HE   | ARG | 89 | 8.301  | -8.482  | 7.310 | 1.00 | 0.00 |
| ATOM | 1447 | CZ   | ARG | 89 | 7.482  | -6.982  | 8.386 | 1.00 | 0.00 |
| ATOM | 1448 | NH1  | ARG | 89 | 6.445  | -6.205  | 8.553 | 1.00 | 0.00 |
| ATOM | 1449 | HH11 | ARG | 89 | 5.649  | -6.292  | 7.938 | 1.00 | 0.00 |
| ATOM | 1450 | HH12 | ARG | 89 | 6.445  | -5.522  | 9.297 | 1.00 | 0.00 |
| ATOM | 1451 | NH2  | ARG | 89 | 8.510  | -6.874  | 9.180 | 1.00 | 0.00 |
| ATOM | 1452 | HH21 | ARG | 89 | 9.310  | -7.477  | 9.051 | 1.00 | 0.00 |
| ATOM | 1453 | HH22 | ARG | 89 | 8.502  | -6.188  | 9.922 | 1.00 | 0.00 |
| ATOM | 1454 | C    | ARG | 89 | 2.335  | -7.946  | 4.780 | 1.00 | 0.00 |
| ATOM | 1455 | O    | ARG | 89 | 2.527  | -7.552  | 3.629 | 1.00 | 0.00 |
| ATOM | 1456 | N    | LEU | 90 | 1.209  | -8.541  | 5.171 | 1.00 | 0.00 |
| ATOM | 1457 | H    | LEU | 90 | 1.111  | -8.857  | 6.125 | 1.00 | 0.00 |
| ATOM | 1458 | CA   | LEU | 90 | 0.105  | -8.774  | 4.248 | 1.00 | 0.00 |
| ATOM | 1459 | HA   | LEU | 90 | 0.439  | -9.375  | 3.402 | 1.00 | 0.00 |
| ATOM | 1460 | CB   | LEU | 90 | -1.014 | -9.530  | 4.974 | 1.00 | 0.00 |
| ATOM | 1461 | HB2  | LEU | 90 | -0.597 | -10.407 | 5.470 | 1.00 | 0.00 |
| ATOM | 1462 | HB3  | LEU | 90 | -1.459 | -8.870  | 5.719 | 1.00 | 0.00 |
| ATOM | 1463 | CG   | LEU | 90 | -2.090 | -9.971  | 3.973 | 1.00 | 0.00 |
| ATOM | 1464 | HG   | LEU | 90 | -1.632 | -10.145 | 3.000 | 1.00 | 0.00 |
| ATOM | 1465 | CD1  | LEU | 90 | -2.746 | -11.264 | 4.466 | 1.00 | 0.00 |
| ATOM | 1466 | HD11 | LEU | 90 | -3.204 | -11.091 | 5.440 | 1.00 | 0.00 |

|      |      |      |     |    |        |         |       |      |      |
|------|------|------|-----|----|--------|---------|-------|------|------|
| ATOM | 1467 | HD12 | LEU | 90 | -3.510 | -11.578 | 3.756 | 1.00 | 0.00 |
| ATOM | 1468 | HD13 | LEU | 90 | -1.990 | -12.045 | 4.555 | 1.00 | 0.00 |
| ATOM | 1469 | CD2  | LEU | 90 | -3.160 | -8.879  | 3.854 | 1.00 | 0.00 |
| ATOM | 1470 | HD21 | LEU | 90 | -2.699 | -7.955  | 3.507 | 1.00 | 0.00 |
| ATOM | 1471 | HD22 | LEU | 90 | -3.923 | -9.194  | 3.143 | 1.00 | 0.00 |
| ATOM | 1472 | HD23 | LEU | 90 | -3.619 | -8.712  | 4.829 | 1.00 | 0.00 |
| ATOM | 1473 | C    | LEU | 90 | -0.430 | -7.451  | 3.710 | 1.00 | 0.00 |
| ATOM | 1474 | O    | LEU | 90 | -0.755 | -7.335  | 2.528 | 1.00 | 0.00 |
| ATOM | 1475 | N    | ALA | 91 | -0.525 | -6.460  | 4.593 | 1.00 | 0.00 |
| ATOM | 1476 | H    | ALA | 91 | -0.264 | -6.610  | 5.558 | 1.00 | 0.00 |
| ATOM | 1477 | CA   | ALA | 91 | -1.030 | -5.148  | 4.209 | 1.00 | 0.00 |
| ATOM | 1478 | HA   | ALA | 91 | -2.070 | -5.223  | 3.892 | 1.00 | 0.00 |
| ATOM | 1479 | CB   | ALA | 91 | -0.949 | -4.188  | 5.399 | 1.00 | 0.00 |
| ATOM | 1480 | HB1  | ALA | 91 | 0.088  | -4.096  | 5.723 | 1.00 | 0.00 |
| ATOM | 1481 | HB2  | ALA | 91 | -1.324 | -3.209  | 5.103 | 1.00 | 0.00 |
| ATOM | 1482 | HB3  | ALA | 91 | -1.552 | -4.575  | 6.221 | 1.00 | 0.00 |
| ATOM | 1483 | C    | ALA | 91 | -0.228 | -4.589  | 3.042 | 1.00 | 0.00 |
| ATOM | 1484 | O    | ALA | 91 | -0.795 | -4.186  | 2.033 | 1.00 | 0.00 |
| ATOM | 1485 | N    | GLU | 92 | 1.094  | -4.577  | 3.190 | 1.00 | 0.00 |
| ATOM | 1486 | H    | GLU | 92 | 1.507  | -4.898  | 4.054 | 1.00 | 0.00 |
| ATOM | 1487 | CA   | GLU | 92 | 1.982  | -4.077  | 2.141 | 1.00 | 0.00 |
| ATOM | 1488 | HA   | GLU | 92 | 1.747  | -3.038  | 1.912 | 1.00 | 0.00 |

|      |      |      |     |    |       |         |        |      |      |
|------|------|------|-----|----|-------|---------|--------|------|------|
| ATOM | 1489 | CB   | GLU | 92 | 3.436 | -4.156  | 2.615  | 1.00 | 0.00 |
| ATOM | 1490 | HB2  | GLU | 92 | 3.529 | -3.654  | 3.578  | 1.00 | 0.00 |
| ATOM | 1491 | HB3  | GLU | 92 | 3.725 | -5.202  | 2.722  | 1.00 | 0.00 |
| ATOM | 1492 | CG   | GLU | 92 | 4.355 | -3.474  | 1.592  | 1.00 | 0.00 |
| ATOM | 1493 | HG2  | GLU | 92 | 4.203 | -3.937  | 0.617  | 1.00 | 0.00 |
| ATOM | 1494 | HG3  | GLU | 92 | 4.096 | -2.417  | 1.537  | 1.00 | 0.00 |
| ATOM | 1495 | CD   | GLU | 92 | 5.822 | -3.618  | 2.001  | 1.00 | 0.00 |
| ATOM | 1496 | OE1  | GLU | 92 | 6.085 | -4.254  | 3.012  | 1.00 | 0.00 |
| ATOM | 1497 | OE2  | GLU | 92 | 6.664 | -3.090  | 1.295  | 1.00 | 0.00 |
| ATOM | 1498 | C    | GLU | 92 | 1.814 | -4.879  | 0.851  | 1.00 | 0.00 |
| ATOM | 1499 | O    | GLU | 92 | 2.007 | -4.352  | -0.244 | 1.00 | 0.00 |
| ATOM | 1500 | N    | ASN | 93 | 1.470 | -6.157  | 0.990  | 1.00 | 0.00 |
| ATOM | 1501 | H    | ASN | 93 | 1.345 | -6.556  | 1.910  | 1.00 | 0.00 |
| ATOM | 1502 | CA   | ASN | 93 | 1.298 | -7.028  | -0.173 | 1.00 | 0.00 |
| ATOM | 1503 | HA   | ASN | 93 | 2.160 | -6.942  | -0.835 | 1.00 | 0.00 |
| ATOM | 1504 | CB   | ASN | 93 | 1.171 | -8.487  | 0.279  | 1.00 | 0.00 |
| ATOM | 1505 | HB2  | ASN | 93 | 0.349 | -8.585  | 0.988  | 1.00 | 0.00 |
| ATOM | 1506 | HB3  | ASN | 93 | 0.986 | -9.129  | -0.582 | 1.00 | 0.00 |
| ATOM | 1507 | CG   | ASN | 93 | 2.460 | -8.945  | 0.961  | 1.00 | 0.00 |
| ATOM | 1508 | OD1  | ASN | 93 | 3.475 | -8.129  | 1.049  | 1.00 | 0.00 |
| ATOM | 1509 | ND2  | ASN | 93 | 2.542 | -10.082 | 1.426  | 1.00 | 0.00 |
| ATOM | 1510 | HD21 | ASN | 93 | 3.396 | -10.380 | 1.876  | 1.00 | 0.00 |

|      |      |      |     |    |        |         |        |      |      |
|------|------|------|-----|----|--------|---------|--------|------|------|
| ATOM | 1511 | HD22 | ASN | 93 | 1.755  | -10.711 | 1.356  | 1.00 | 0.00 |
| ATOM | 1512 | C    | ASN | 93 | 0.063  | -6.638  | -0.986 | 1.00 | 0.00 |
| ATOM | 1513 | O    | ASN | 93 | 0.064  | -6.751  | -2.212 | 1.00 | 0.00 |
| ATOM | 1514 | N    | ILE | 94 | -0.989 | -6.186  | -0.303 | 1.00 | 0.00 |
| ATOM | 1515 | H    | ILE | 94 | -0.967 | -6.144  | 0.706  | 1.00 | 0.00 |
| ATOM | 1516 | CA   | ILE | 94 | -2.221 | -5.794  | -0.987 | 1.00 | 0.00 |
| ATOM | 1517 | HA   | ILE | 94 | -2.670 | -6.673  | -1.450 | 1.00 | 0.00 |
| ATOM | 1518 | CB   | ILE | 94 | -3.209 | -5.184  | 0.020  | 1.00 | 0.00 |
| ATOM | 1519 | HB   | ILE | 94 | -2.661 | -4.556  | 0.723  | 1.00 | 0.00 |
| ATOM | 1520 | CG2  | ILE | 94 | -4.257 | -4.337  | -0.713 | 1.00 | 0.00 |
| ATOM | 1521 | HG21 | ILE | 94 | -4.805 | -4.965  | -1.415 | 1.00 | 0.00 |
| ATOM | 1522 | HG22 | ILE | 94 | -4.951 | -3.911  | 0.011  | 1.00 | 0.00 |
| ATOM | 1523 | HG23 | ILE | 94 | -3.760 | -3.534  | -1.256 | 1.00 | 0.00 |
| ATOM | 1524 | CG1  | ILE | 94 | -3.913 | -6.315  | 0.782  | 1.00 | 0.00 |
| ATOM | 1525 | HG12 | ILE | 94 | -4.701 | -6.736  | 0.158  | 1.00 | 0.00 |
| ATOM | 1526 | HG13 | ILE | 94 | -3.188 | -7.093  | 1.026  | 1.00 | 0.00 |
| ATOM | 1527 | CD1  | ILE | 94 | -4.525 | -5.765  | 2.074  | 1.00 | 0.00 |
| ATOM | 1528 | HD11 | ILE | 94 | -5.249 | -4.988  | 1.832  | 1.00 | 0.00 |
| ATOM | 1529 | HD12 | ILE | 94 | -5.024 | -6.571  | 2.612  | 1.00 | 0.00 |
| ATOM | 1530 | HD13 | ILE | 94 | -3.737 | -5.345  | 2.700  | 1.00 | 0.00 |
| ATOM | 1531 | C    | ILE | 94 | -1.925 | -4.803  | -2.121 | 1.00 | 0.00 |
| ATOM | 1532 | O    | ILE | 94 | -2.278 | -5.053  | -3.273 | 1.00 | 0.00 |

|      |      |     |     |    |        |        |        |      |      |
|------|------|-----|-----|----|--------|--------|--------|------|------|
| ATOM | 1533 | N   | PRO | 95 | -1.285 | -3.698 | -1.825 | 1.00 | 0.00 |
| ATOM | 1534 | CD  | PRO | 95 | -0.829 | -3.302 | -0.484 | 1.00 | 0.00 |
| ATOM | 1535 | HD2 | PRO | 95 | -0.258 | -4.121 | -0.046 | 1.00 | 0.00 |
| ATOM | 1536 | HD3 | PRO | 95 | -1.698 | -3.092 | 0.140  | 1.00 | 0.00 |
| ATOM | 1537 | CG  | PRO | 95 | 0.023  | -2.061 | -0.732 | 1.00 | 0.00 |
| ATOM | 1538 | HG2 | PRO | 95 | 1.073  | -2.350 | -0.793 | 1.00 | 0.00 |
| ATOM | 1539 | HG3 | PRO | 95 | -0.112 | -1.359 | 0.091  | 1.00 | 0.00 |
| ATOM | 1540 | CB  | PRO | 95 | -0.456 | -1.476 | -2.014 | 1.00 | 0.00 |
| ATOM | 1541 | HB2 | PRO | 95 | 0.374  | -0.982 | -2.518 | 1.00 | 0.00 |
| ATOM | 1542 | HB3 | PRO | 95 | -1.271 | -0.767 | -1.875 | 1.00 | 0.00 |
| ATOM | 1543 | CA  | PRO | 95 | -0.936 | -2.667 | -2.847 | 1.00 | 0.00 |
| ATOM | 1544 | HA  | PRO | 95 | -1.839 | -2.439 | -3.413 | 1.00 | 0.00 |
| ATOM | 1545 | C   | PRO | 95 | 0.162  | -3.131 | -3.806 | 1.00 | 0.00 |
| ATOM | 1546 | O   | PRO | 95 | 0.257  | -2.636 | -4.925 | 1.00 | 0.00 |
| ATOM | 1547 | N   | SER | 96 | 0.981  | -4.091 | -3.366 | 1.00 | 0.00 |
| ATOM | 1548 | H   | SER | 96 | 0.875  | -4.465 | -2.434 | 1.00 | 0.00 |
| ATOM | 1549 | CA  | SER | 96 | 2.056  | -4.617 | -4.206 | 1.00 | 0.00 |
| ATOM | 1550 | HA  | SER | 96 | 2.717  | -3.805 | -4.509 | 1.00 | 0.00 |
| ATOM | 1551 | CB  | SER | 96 | 2.878  | -5.657 | -3.442 | 1.00 | 0.00 |
| ATOM | 1552 | HB2 | SER | 96 | 2.237  | -6.492 | -3.158 | 1.00 | 0.00 |
| ATOM | 1553 | HB3 | SER | 96 | 3.687  | -6.020 | -4.076 | 1.00 | 0.00 |
| ATOM | 1554 | OG  | SER | 96 | 3.423  | -5.061 | -2.274 | 1.00 | 0.00 |

|      |      |      |     |    |        |         |        |      |      |
|------|------|------|-----|----|--------|---------|--------|------|------|
| ATOM | 1555 | HG   | SER | 96 | 3.939  | -5.713  | -1.793 | 1.00 | 0.00 |
| ATOM | 1556 | C    | SER | 96 | 1.443  | -5.247  | -5.429 | 1.00 | 0.00 |
| ATOM | 1557 | O    | SER | 96 | 1.919  | -5.097  | -6.555 | 1.00 | 0.00 |
| ATOM | 1558 | N    | ARG | 97 | 0.362  | -5.946  | -5.160 | 1.00 | 0.00 |
| ATOM | 1559 | H    | ARG | 97 | 0.061  | -6.025  | -4.199 | 1.00 | 0.00 |
| ATOM | 1560 | CA   | ARG | 97 | -0.400 | -6.629  | -6.172 | 1.00 | 0.00 |
| ATOM | 1561 | HA   | ARG | 97 | 0.192  | -7.410  | -6.650 | 1.00 | 0.00 |
| ATOM | 1562 | CB   | ARG | 97 | -1.599 | -7.276  | -5.491 | 1.00 | 0.00 |
| ATOM | 1563 | HB2  | ARG | 97 | -2.058 | -6.560  | -4.810 | 1.00 | 0.00 |
| ATOM | 1564 | HB3  | ARG | 97 | -2.325 | -7.575  | -6.246 | 1.00 | 0.00 |
| ATOM | 1565 | CG   | ARG | 97 | -1.144 | -8.510  | -4.703 | 1.00 | 0.00 |
| ATOM | 1566 | HG2  | ARG | 97 | -0.605 | -9.185  | -5.368 | 1.00 | 0.00 |
| ATOM | 1567 | HG3  | ARG | 97 | -0.485 | -8.198  | -3.892 | 1.00 | 0.00 |
| ATOM | 1568 | CD   | ARG | 97 | -2.361 | -9.233  | -4.121 | 1.00 | 0.00 |
| ATOM | 1569 | HD2  | ARG | 97 | -3.000 | -9.590  | -4.929 | 1.00 | 0.00 |
| ATOM | 1570 | HD3  | ARG | 97 | -2.034 | -10.079 | -3.516 | 1.00 | 0.00 |
| ATOM | 1571 | NE   | ARG | 97 | -3.136 | -8.326  | -3.277 | 1.00 | 0.00 |
| ATOM | 1572 | HE   | ARG | 97 | -2.869 | -8.186  | -2.313 | 1.00 | 0.00 |
| ATOM | 1573 | CZ   | ARG | 97 | -4.197 | -7.670  | -3.745 | 1.00 | 0.00 |
| ATOM | 1574 | NH1  | ARG | 97 | -4.583 | -7.831  | -4.983 | 1.00 | 0.00 |
| ATOM | 1575 | HH11 | ARG | 97 | -4.073 | -8.457  | -5.590 | 1.00 | 0.00 |
| ATOM | 1576 | HH12 | ARG | 97 | -5.388 | -7.329  | -5.327 | 1.00 | 0.00 |



|      |      |      |     |    |        |        |        |      |      |
|------|------|------|-----|----|--------|--------|--------|------|------|
| ATOM | 1577 | NH2  | ARG | 97 | -4.854 | -6.861 | -2.962 | 1.00 | 0.00 |
| ATOM | 1578 | HH21 | ARG | 97 | -4.555 | -6.736 | -2.005 | 1.00 | 0.00 |
| ATOM | 1579 | HH22 | ARG | 97 | -5.658 | -6.363 | -3.315 | 1.00 | 0.00 |
| ATOM | 1580 | C    | ARG | 97 | -0.865 | -5.672 | -7.269 | 1.00 | 0.00 |
| ATOM | 1581 | O    | ARG | 97 | -0.921 | -6.046 | -8.441 | 1.00 | 0.00 |
| ATOM | 1582 | N    | CYX | 98 | -1.188 | -4.437 | -6.886 | 1.00 | 0.00 |
| ATOM | 1583 | H    | CYX | 98 | -1.124 | -4.169 | -5.914 | 1.00 | 0.00 |
| ATOM | 1584 | CA   | CYX | 98 | -1.635 | -3.442 | -7.848 | 1.00 | 0.00 |
| ATOM | 1585 | HA   | CYX | 98 | -1.950 | -3.940 | -8.765 | 1.00 | 0.00 |
| ATOM | 1586 | CB   | CYX | 98 | -2.811 | -2.635 | -7.301 | 1.00 | 0.00 |
| ATOM | 1587 | HB2  | CYX | 98 | -2.445 | -1.698 | -6.881 | 1.00 | 0.00 |
| ATOM | 1588 | HB3  | CYX | 98 | -3.512 | -2.422 | -8.107 | 1.00 | 0.00 |
| ATOM | 1589 | SG   | CYX | 98 | -3.640 | -3.569 | -5.988 | 1.00 | 0.00 |
| ATOM | 1590 | C    | CYX | 98 | -0.515 | -2.483 | -8.162 | 1.00 | 0.00 |
| ATOM | 1591 | O    | CYX | 98 | -0.632 | -1.667 | -9.076 | 1.00 | 0.00 |
| ATOM | 1592 | N    | ASN | 99 | 0.558  | -2.549 | -7.380 | 1.00 | 0.00 |
| ATOM | 1593 | H    | ASN | 99 | 0.607  | -3.180 | -6.592 | 1.00 | 0.00 |
| ATOM | 1594 | CA   | ASN | 99 | 1.653  | -1.632 | -7.591 | 1.00 | 0.00 |
| ATOM | 1595 | HA   | ASN | 99 | 1.272  | -0.618 | -7.471 | 1.00 | 0.00 |
| ATOM | 1596 | CB   | ASN | 99 | 2.810  | -1.827 | -6.642 | 1.00 | 0.00 |
| ATOM | 1597 | HB2  | ASN | 99 | 2.945  | -2.884 | -6.413 | 1.00 | 0.00 |
| ATOM | 1598 | HB3  | ASN | 99 | 3.725  | -1.432 | -7.084 | 1.00 | 0.00 |

|      |      |      |     |     |        |        |         |      |      |
|------|------|------|-----|-----|--------|--------|---------|------|------|
| ATOM | 1599 | CG   | ASN | 99  | 2.534  | -1.079 | -5.343  | 1.00 | 0.00 |
| ATOM | 1600 | OD1  | ASN | 99  | 2.830  | -1.576 | -4.257  | 1.00 | 0.00 |
| ATOM | 1601 | ND2  | ASN | 99  | 1.984  | 0.105  | -5.398  | 1.00 | 0.00 |
| ATOM | 1602 | HD21 | ASN | 99  | 1.796  | 0.611  | -4.544  | 1.00 | 0.00 |
| ATOM | 1603 | HD22 | ASN | 99  | 1.750  | 0.508  | -6.293  | 1.00 | 0.00 |
| ATOM | 1604 | C    | ASN | 99  | 2.149  | -1.693 | -9.002  | 1.00 | 0.00 |
| ATOM | 1605 | O    | ASN | 99  | 1.977  | -2.679 | -9.722  | 1.00 | 0.00 |
| ATOM | 1606 | N    | LEU | 100 | 2.678  | -0.568 | -9.397  | 1.00 | 0.00 |
| ATOM | 1607 | H    | LEU | 100 | 2.780  | 0.191  | -8.738  | 1.00 | 0.00 |
| ATOM | 1608 | CA   | LEU | 100 | 3.125  | -0.363 | -10.749 | 1.00 | 0.00 |
| ATOM | 1609 | HA   | LEU | 100 | 3.453  | -1.293 | -11.213 | 1.00 | 0.00 |
| ATOM | 1610 | CB   | LEU | 100 | 1.915  | 0.172  | -11.524 | 1.00 | 0.00 |
| ATOM | 1611 | HB2  | LEU | 100 | 2.231  | 1.042  | -12.099 | 1.00 | 0.00 |
| ATOM | 1612 | HB3  | LEU | 100 | 1.516  | -0.585 | -12.199 | 1.00 | 0.00 |
| ATOM | 1613 | CG   | LEU | 100 | 0.815  | 0.593  | -10.511 | 1.00 | 0.00 |
| ATOM | 1614 | HG   | LEU | 100 | 0.816  | -0.100 | -9.669  | 1.00 | 0.00 |
| ATOM | 1615 | CD1  | LEU | 100 | 1.090  | 2.009  | -10.005 | 1.00 | 0.00 |
| ATOM | 1616 | HD11 | LEU | 100 | 1.089  | 2.702  | -10.846 | 1.00 | 0.00 |
| ATOM | 1617 | HD12 | LEU | 100 | 0.316  | 2.298  | -9.295  | 1.00 | 0.00 |
| ATOM | 1618 | HD13 | LEU | 100 | 2.062  | 2.037  | -9.512  | 1.00 | 0.00 |
| ATOM | 1619 | CD2  | LEU | 100 | -0.556 | 0.526  | -11.167 | 1.00 | 0.00 |
| ATOM | 1620 | HD21 | LEU | 100 | -0.750 | -0.494 | -11.501 | 1.00 | 0.00 |

|      |      |      |     |     |        |        |         |      |      |
|------|------|------|-----|-----|--------|--------|---------|------|------|
| ATOM | 1621 | HD22 | LEU | 100 | -1.318 | 0.823  | -10.447 | 1.00 | 0.00 |
| ATOM | 1622 | HD23 | LEU | 100 | -0.583 | 1.200  | -12.023 | 1.00 | 0.00 |
| ATOM | 1623 | C    | LEU | 100 | 4.274  | 0.640  | -10.779 | 1.00 | 0.00 |
| ATOM | 1624 | O    | LEU | 100 | 4.248  | 1.634  | -10.056 | 1.00 | 0.00 |
| ATOM | 1625 | N    | SER | 101 | 5.278  | 0.359  | -11.613 | 1.00 | 0.00 |
| ATOM | 1626 | H    | SER | 101 | 5.244  | -0.485 | -12.167 | 1.00 | 0.00 |
| ATOM | 1627 | CA   | SER | 101 | 6.454  | 1.225  | -11.738 | 1.00 | 0.00 |
| ATOM | 1628 | HA   | SER | 101 | 7.191  | 0.972  | -10.975 | 1.00 | 0.00 |
| ATOM | 1629 | CB   | SER | 101 | 7.091  | 1.033  | -13.116 | 1.00 | 0.00 |
| ATOM | 1630 | HB2  | SER | 101 | 7.378  | -0.011 | -13.243 | 1.00 | 0.00 |
| ATOM | 1631 | HB3  | SER | 101 | 6.376  | 1.310  | -13.890 | 1.00 | 0.00 |
| ATOM | 1632 | OG   | SER | 101 | 8.245  | 1.857  | -13.220 | 1.00 | 0.00 |
| ATOM | 1633 | HG   | SER | 101 | 8.647  | 1.738  | -14.084 | 1.00 | 0.00 |
| ATOM | 1634 | C    | SER | 101 | 6.077  | 2.694  | -11.550 | 1.00 | 0.00 |
| ATOM | 1635 | O    | SER | 101 | 5.628  | 3.358  | -12.485 | 1.00 | 0.00 |
| ATOM | 1636 | N    | PRO | 102 | 6.248  | 3.203  | -10.355 | 1.00 | 0.00 |
| ATOM | 1637 | CD   | PRO | 102 | 6.762  | 2.497  | -9.185  | 1.00 | 0.00 |
| ATOM | 1638 | HD2  | PRO | 102 | 7.837  | 2.655  | -9.091  | 1.00 | 0.00 |
| ATOM | 1639 | HD3  | PRO | 102 | 6.559  | 1.429  | -9.270  | 1.00 | 0.00 |
| ATOM | 1640 | CG   | PRO | 102 | 5.975  | 3.149  | -8.060  | 1.00 | 0.00 |
| ATOM | 1641 | HG2  | PRO | 102 | 6.558  | 3.101  | -7.140  | 1.00 | 0.00 |
| ATOM | 1642 | HG3  | PRO | 102 | 5.035  | 2.614  | -7.922  | 1.00 | 0.00 |

|      |      |     |     |     |        |       |         |      |      |
|------|------|-----|-----|-----|--------|-------|---------|------|------|
| ATOM | 1643 | CB  | PRO | 102 | 5.727  | 4.571 | -8.480  | 1.00 | 0.00 |
| ATOM | 1644 | HB2 | PRO | 102 | 6.470  | 5.203 | -7.993  | 1.00 | 0.00 |
| ATOM | 1645 | HB3 | PRO | 102 | 4.728  | 4.923 | -8.225  | 1.00 | 0.00 |
| ATOM | 1646 | CA  | PRO | 102 | 5.925  | 4.611 | -10.009 | 1.00 | 0.00 |
| ATOM | 1647 | HA  | PRO | 102 | 5.014  | 4.893 | -10.536 | 1.00 | 0.00 |
| ATOM | 1648 | C   | PRO | 102 | 7.052  | 5.563 | -10.397 | 1.00 | 0.00 |
| ATOM | 1649 | O   | PRO | 102 | 8.170  | 5.451 | -9.890  | 1.00 | 0.00 |
| ATOM | 1650 | N   | MET | 103 | 6.756  | 6.495 | -11.299 | 1.00 | 0.00 |
| ATOM | 1651 | H   | MET | 103 | 5.833  | 6.546 | -11.706 | 1.00 | 0.00 |
| ATOM | 1652 | CA  | MET | 103 | 7.761  | 7.452 | -11.743 | 1.00 | 0.00 |
| ATOM | 1653 | HA  | MET | 103 | 8.666  | 6.928 | -12.051 | 1.00 | 0.00 |
| ATOM | 1654 | CB  | MET | 103 | 7.228  | 8.253 | -12.936 | 1.00 | 0.00 |
| ATOM | 1655 | HB2 | MET | 103 | 6.302  | 8.751 | -12.651 | 1.00 | 0.00 |
| ATOM | 1656 | HB3 | MET | 103 | 7.967  | 8.999 | -13.228 | 1.00 | 0.00 |
| ATOM | 1657 | CG  | MET | 103 | 6.959  | 7.311 | -14.115 | 1.00 | 0.00 |
| ATOM | 1658 | HG2 | MET | 103 | 6.172  | 6.606 | -13.847 | 1.00 | 0.00 |
| ATOM | 1659 | HG3 | MET | 103 | 6.646  | 7.891 | -14.982 | 1.00 | 0.00 |
| ATOM | 1660 | SD  | MET | 103 | 8.466  | 6.394 | -14.525 | 1.00 | 0.00 |
| ATOM | 1661 | CE  | MET | 103 | 9.482  | 7.811 | -15.012 | 1.00 | 0.00 |
| ATOM | 1662 | HE1 | MET | 103 | 9.575  | 8.498 | -14.171 | 1.00 | 0.00 |
| ATOM | 1663 | HE2 | MET | 103 | 10.472 | 7.464 | -15.308 | 1.00 | 0.00 |
| ATOM | 1664 | HE3 | MET | 103 | 9.012  | 8.324 | -15.850 | 1.00 | 0.00 |

|      |      |      |     |     |        |        |         |      |      |
|------|------|------|-----|-----|--------|--------|---------|------|------|
| ATOM | 1665 | C    | MET | 103 | 8.129  | 8.405  | -10.611 | 1.00 | 0.00 |
| ATOM | 1666 | O    | MET | 103 | 9.295  | 8.497  | -10.222 | 1.00 | 0.00 |
| ATOM | 1667 | N    | ARG | 104 | 7.128  | 9.105  | -10.080 | 1.00 | 0.00 |
| ATOM | 1668 | H    | ARG | 104 | 6.189  | 9.012  | -10.439 | 1.00 | 0.00 |
| ATOM | 1669 | CA   | ARG | 104 | 7.360  | 10.040 | -8.983  | 1.00 | 0.00 |
| ATOM | 1670 | HA   | ARG | 104 | 8.181  | 9.689  | -8.358  | 1.00 | 0.00 |
| ATOM | 1671 | CB   | ARG | 104 | 7.727  | 11.420 | -9.545  | 1.00 | 0.00 |
| ATOM | 1672 | HB2  | ARG | 104 | 7.427  | 11.472 | -10.591 | 1.00 | 0.00 |
| ATOM | 1673 | HB3  | ARG | 104 | 7.203  | 12.189 | -8.978  | 1.00 | 0.00 |
| ATOM | 1674 | CG   | ARG | 104 | 9.241  | 11.646 | -9.435  | 1.00 | 0.00 |
| ATOM | 1675 | HG2  | ARG | 104 | 9.763  | 10.830 | -9.936  | 1.00 | 0.00 |
| ATOM | 1676 | HG3  | ARG | 104 | 9.499  | 12.590 | -9.914  | 1.00 | 0.00 |
| ATOM | 1677 | CD   | ARG | 104 | 9.660  | 11.691 | -7.960  | 1.00 | 0.00 |
| ATOM | 1678 | HD2  | ARG | 104 | 9.835  | 10.678 | -7.597  | 1.00 | 0.00 |
| ATOM | 1679 | HD3  | ARG | 104 | 10.574 | 12.276 | -7.855  | 1.00 | 0.00 |
| ATOM | 1680 | NE   | ARG | 104 | 8.614  | 12.306 | -7.146  | 1.00 | 0.00 |
| ATOM | 1681 | HE   | ARG | 104 | 8.012  | 11.726 | -6.579  | 1.00 | 0.00 |
| ATOM | 1682 | CZ   | ARG | 104 | 8.426  | 13.624 | -7.129  | 1.00 | 0.00 |
| ATOM | 1683 | NH1  | ARG | 104 | 9.189  | 14.406 | -7.845  | 1.00 | 0.00 |
| ATOM | 1684 | HH11 | ARG | 104 | 9.924  | 14.008 | -8.412  | 1.00 | 0.00 |
| ATOM | 1685 | HH12 | ARG | 104 | 9.041  | 15.405 | -7.827  | 1.00 | 0.00 |
| ATOM | 1686 | NH2  | ARG | 104 | 7.479  | 14.135 | -6.394  | 1.00 | 0.00 |

|      |      |      |     |     |       |        |        |      |      |
|------|------|------|-----|-----|-------|--------|--------|------|------|
| ATOM | 1687 | HH21 | ARG | 104 | 6.891 | 13.528 | -5.840 | 1.00 | 0.00 |
| ATOM | 1688 | HH22 | ARG | 104 | 7.338 | 15.135 | -6.382 | 1.00 | 0.00 |
| ATOM | 1689 | C    | ARG | 104 | 6.122 | 10.169 | -8.097 | 1.00 | 0.00 |
| ATOM | 1690 | O    | ARG | 104 | 4.997 | 10.226 | -8.593 | 1.00 | 0.00 |
| ATOM | 1691 | N    | CYX | 105 | 6.347 | 10.246 | -6.786 | 1.00 | 0.00 |
| ATOM | 1692 | H    | CYX | 105 | 7.289 | 10.178 | -6.427 | 1.00 | 0.00 |
| ATOM | 1693 | CA   | CYX | 105 | 5.253 | 10.406 | -5.832 | 1.00 | 0.00 |
| ATOM | 1694 | HA   | CYX | 105 | 4.300 | 10.234 | -6.331 | 1.00 | 0.00 |
| ATOM | 1695 | CB   | CYX | 105 | 5.392 | 9.402  | -4.685 | 1.00 | 0.00 |
| ATOM | 1696 | HB2  | CYX | 105 | 6.428 | 9.378  | -4.346 | 1.00 | 0.00 |
| ATOM | 1697 | HB3  | CYX | 105 | 4.747 | 9.701  | -3.859 | 1.00 | 0.00 |
| ATOM | 1698 | SG   | CYX | 105 | 4.933 | 7.748  | -5.265 | 1.00 | 0.00 |
| ATOM | 1699 | C    | CYX | 105 | 5.259 | 11.830 | -5.274 | 1.00 | 0.00 |
| ATOM | 1700 | O    | CYX | 105 | 6.168 | 12.202 | -4.532 | 1.00 | 0.00 |
| ATOM | 1701 | N    | PRO | 106 | 4.276 | 12.630 | -5.616 | 1.00 | 0.00 |
| ATOM | 1702 | CD   | PRO | 106 | 3.158 | 12.283 | -6.505 | 1.00 | 0.00 |
| ATOM | 1703 | HD2  | PRO | 106 | 2.466 | 11.630 | -5.972 | 1.00 | 0.00 |
| ATOM | 1704 | HD3  | PRO | 106 | 3.545 | 11.763 | -7.381 | 1.00 | 0.00 |
| ATOM | 1705 | CG   | PRO | 106 | 2.537 | 13.636 | -6.856 | 1.00 | 0.00 |
| ATOM | 1706 | HG2  | PRO | 106 | 1.458 | 13.517 | -6.952 | 1.00 | 0.00 |
| ATOM | 1707 | HG3  | PRO | 106 | 2.950 | 13.981 | -7.804 | 1.00 | 0.00 |
| ATOM | 1708 | CB   | PRO | 106 | 2.886 | 14.576 | -5.749 | 1.00 | 0.00 |

|      |      |         |     |       |        |        |      |      |
|------|------|---------|-----|-------|--------|--------|------|------|
| ATOM | 1709 | HB2 PRO | 106 | 2.092 | 14.579 | -5.002 | 1.00 | 0.00 |
| ATOM | 1710 | HB3 PRO | 106 | 3.041 | 15.590 | -6.118 | 1.00 | 0.00 |
| ATOM | 1711 | CA PRO  | 106 | 4.179 | 14.043 | -5.131 | 1.00 | 0.00 |
| ATOM | 1712 | HA PRO  | 106 | 5.051 | 14.579 | -5.505 | 1.00 | 0.00 |
| ATOM | 1713 | C PRO   | 106 | 4.126 | 14.157 | -3.613 | 1.00 | 0.00 |
| ATOM | 1714 | O PRO   | 106 | 3.949 | 15.247 | -3.072 | 1.00 | 0.00 |
| ATOM | 1715 | N MET   | 107 | 4.280 | 13.034 | -2.935 | 1.00 | 0.00 |
| ATOM | 1716 | H MET   | 107 | 4.438 | 12.161 | -3.418 | 1.00 | 0.00 |
| ATOM | 1717 | CA MET  | 107 | 4.248 | 13.021 | -1.484 | 1.00 | 0.00 |
| ATOM | 1718 | HA MET  | 107 | 3.421 | 13.627 | -1.114 | 1.00 | 0.00 |
| ATOM | 1719 | CB MET  | 107 | 4.056 | 11.603 | -1.009 | 1.00 | 0.00 |
| ATOM | 1720 | HB2 MET | 107 | 4.662 | 10.937 | -1.623 | 1.00 | 0.00 |
| ATOM | 1721 | HB3 MET | 107 | 4.377 | 11.529 | 0.030  | 1.00 | 0.00 |
| ATOM | 1722 | CG MET  | 107 | 2.581 | 11.198 | -1.118 | 1.00 | 0.00 |
| ATOM | 1723 | HG2 MET | 107 | 2.502 | 10.264 | -1.675 | 1.00 | 0.00 |
| ATOM | 1724 | HG3 MET | 107 | 2.169 | 11.060 | -0.118 | 1.00 | 0.00 |
| ATOM | 1725 | SD MET  | 107 | 1.640 | 12.487 | -1.979 | 1.00 | 0.00 |
| ATOM | 1726 | CE MET  | 107 | 1.617 | 11.713 | -3.613 | 1.00 | 0.00 |
| ATOM | 1727 | HE1 MET | 107 | 1.122 | 10.744 | -3.550 | 1.00 | 0.00 |
| ATOM | 1728 | HE2 MET | 107 | 1.077 | 12.352 | -4.311 | 1.00 | 0.00 |
| ATOM | 1729 | HE3 MET | 107 | 2.640 | 11.575 | -3.964 | 1.00 | 0.00 |
| ATOM | 1730 | C MET   | 107 | 5.555 | 13.543 | -0.933 | 1.00 | 0.00 |

|      |      |     |     |     |        |        |        |      |      |
|------|------|-----|-----|-----|--------|--------|--------|------|------|
| ATOM | 1731 | O   | MET | 107 | 6.504  | 12.790 | -0.706 | 1.00 | 0.00 |
| ATOM | 1732 | N   | GLY | 108 | 5.589  | 14.839 | -0.726 | 1.00 | 0.00 |
| ATOM | 1733 | H   | GLY | 108 | 4.781  | 15.409 | -0.931 | 1.00 | 0.00 |
| ATOM | 1734 | CA  | GLY | 108 | 6.772  | 15.488 | -0.203 | 1.00 | 0.00 |
| ATOM | 1735 | HA2 | GLY | 108 | 6.508  | 16.484 | 0.151  | 1.00 | 0.00 |
| ATOM | 1736 | HA3 | GLY | 108 | 7.167  | 14.901 | 0.627  | 1.00 | 0.00 |
| ATOM | 1737 | C   | GLY | 108 | 7.846  | 15.612 | -1.278 | 1.00 | 0.00 |
| ATOM | 1738 | O   | GLY | 108 | 9.038  | 15.668 | -0.974 | 1.00 | 0.00 |
| ATOM | 1739 | N   | GLY | 109 | 7.409  | 15.661 | -2.535 | 1.00 | 0.00 |
| ATOM | 1740 | H   | GLY | 109 | 6.420  | 15.610 | -2.732 | 1.00 | 0.00 |
| ATOM | 1741 | CA  | GLY | 109 | 8.334  | 15.788 | -3.658 | 1.00 | 0.00 |
| ATOM | 1742 | HA2 | GLY | 109 | 7.779  | 15.679 | -4.589 | 1.00 | 0.00 |
| ATOM | 1743 | HA3 | GLY | 109 | 8.800  | 16.773 | -3.625 | 1.00 | 0.00 |
| ATOM | 1744 | C   | GLY | 109 | 9.425  | 14.721 | -3.603 | 1.00 | 0.00 |
| ATOM | 1745 | O   | GLY | 109 | 10.596 | 15.033 | -3.382 | 1.00 | 0.00 |
| ATOM | 1746 | N   | SER | 110 | 9.034  | 13.463 | -3.807 | 1.00 | 0.00 |
| ATOM | 1747 | H   | SER | 110 | 8.060  | 13.248 | -3.963 | 1.00 | 0.00 |
| ATOM | 1748 | CA  | SER | 110 | 9.992  | 12.358 | -3.780 | 1.00 | 0.00 |
| ATOM | 1749 | HA  | SER | 110 | 10.422 | 12.261 | -2.783 | 1.00 | 0.00 |
| ATOM | 1750 | CB  | SER | 110 | 9.292  | 11.048 | -4.139 | 1.00 | 0.00 |
| ATOM | 1751 | HB2 | SER | 110 | 8.928  | 11.098 | -5.165 | 1.00 | 0.00 |
| ATOM | 1752 | HB3 | SER | 110 | 9.995  | 10.220 | -4.043 | 1.00 | 0.00 |



|      |      |      |     |     |        |        |        |      |      |
|------|------|------|-----|-----|--------|--------|--------|------|------|
| ATOM | 1753 | OG   | SER | 110 | 8.196  | 10.843 | -3.256 | 1.00 | 0.00 |
| ATOM | 1754 | HG   | SER | 110 | 7.755  | 10.020 | -3.479 | 1.00 | 0.00 |
| ATOM | 1755 | C    | SER | 110 | 11.135 | 12.619 | -4.759 | 1.00 | 0.00 |
| ATOM | 1756 | O    | SER | 110 | 10.978 | 13.370 | -5.722 | 1.00 | 0.00 |
| ATOM | 1757 | N    | ILE | 111 | 12.286 | 12.002 | -4.504 | 1.00 | 0.00 |
| ATOM | 1758 | H    | ILE | 111 | 12.384 | 11.413 | -3.689 | 1.00 | 0.00 |
| ATOM | 1759 | CA   | ILE | 111 | 13.449 | 12.186 | -5.369 | 1.00 | 0.00 |
| ATOM | 1760 | HA   | ILE | 111 | 13.359 | 13.135 | -5.897 | 1.00 | 0.00 |
| ATOM | 1761 | CB   | ILE | 111 | 14.731 | 12.190 | -4.528 | 1.00 | 0.00 |
| ATOM | 1762 | HB   | ILE | 111 | 14.827 | 11.236 | -4.008 | 1.00 | 0.00 |
| ATOM | 1763 | CG2  | ILE | 111 | 15.945 | 12.398 | -5.441 | 1.00 | 0.00 |
| ATOM | 1764 | HG21 | ILE | 111 | 15.851 | 13.351 | -5.960 | 1.00 | 0.00 |
| ATOM | 1765 | HG22 | ILE | 111 | 16.855 | 12.400 | -4.841 | 1.00 | 0.00 |
| ATOM | 1766 | HG23 | ILE | 111 | 15.994 | 11.590 | -6.171 | 1.00 | 0.00 |
| ATOM | 1767 | CG1  | ILE | 111 | 14.662 | 13.328 | -3.501 | 1.00 | 0.00 |
| ATOM | 1768 | HG12 | ILE | 111 | 14.691 | 14.286 | -4.020 | 1.00 | 0.00 |
| ATOM | 1769 | HG13 | ILE | 111 | 13.733 | 13.249 | -2.936 | 1.00 | 0.00 |
| ATOM | 1770 | CD1  | ILE | 111 | 15.852 | 13.231 | -2.542 | 1.00 | 0.00 |
| ATOM | 1771 | HD11 | ILE | 111 | 16.782 | 13.309 | -3.106 | 1.00 | 0.00 |
| ATOM | 1772 | HD12 | ILE | 111 | 15.800 | 14.040 | -1.814 | 1.00 | 0.00 |
| ATOM | 1773 | HD13 | ILE | 111 | 15.824 | 12.273 | -2.022 | 1.00 | 0.00 |
| ATOM | 1774 | C    | ILE | 111 | 13.518 | 11.081 | -6.421 | 1.00 | 0.00 |

|      |      |     |     |     |        |        |        |      |      |
|------|------|-----|-----|-----|--------|--------|--------|------|------|
| ATOM | 1775 | O   | ILE | 111 | 13.126 | 11.281 | -7.572 | 1.00 | 0.00 |
| ATOM | 1776 | N   | ALA | 112 | 13.993 | 9.908  | -6.007 | 1.00 | 0.00 |
| ATOM | 1777 | H   | ALA | 112 | 14.294 | 9.796  | -5.049 | 1.00 | 0.00 |
| ATOM | 1778 | CA  | ALA | 112 | 14.084 | 8.764  | -6.895 | 1.00 | 0.00 |
| ATOM | 1779 | HA  | ALA | 112 | 14.573 | 9.010  | -7.837 | 1.00 | 0.00 |
| ATOM | 1780 | CB  | ALA | 112 | 14.861 | 7.636  | -6.223 | 1.00 | 0.00 |
| ATOM | 1781 | HB1 | ALA | 112 | 14.378 | 7.372  | -5.282 | 1.00 | 0.00 |
| ATOM | 1782 | HB2 | ALA | 112 | 14.879 | 6.765  | -6.878 | 1.00 | 0.00 |
| ATOM | 1783 | HB3 | ALA | 112 | 15.882 | 7.963  | -6.027 | 1.00 | 0.00 |
| ATOM | 1784 | C   | ALA | 112 | 12.693 | 8.288  | -7.204 | 1.00 | 0.00 |
| ATOM | 1785 | O   | ALA | 112 | 11.717 | 8.966  | -6.878 | 1.00 | 0.00 |
| ATOM | 1786 | N   | GLY | 113 | 12.579 | 7.104  | -7.777 | 1.00 | 0.00 |
| ATOM | 1787 | H   | GLY | 113 | 13.368 | 6.535  | -8.050 | 1.00 | 0.00 |
| ATOM | 1788 | CA  | GLY | 113 | 11.260 | 6.600  | -8.023 | 1.00 | 0.00 |
| ATOM | 1789 | HA2 | GLY | 113 | 10.606 | 7.385  | -8.400 | 1.00 | 0.00 |
| ATOM | 1790 | HA3 | GLY | 113 | 11.284 | 5.774  | -8.734 | 1.00 | 0.00 |
| ATOM | 1791 | C   | GLY | 113 | 10.715 | 6.097  | -6.702 | 1.00 | 0.00 |
| ATOM | 1792 | O   | GLY | 113 | 11.004 | 4.978  | -6.276 | 1.00 | 0.00 |
| ATOM | 1793 | N   | PHE | 114 | 9.955  | 6.964  | -6.050 | 1.00 | 0.00 |
| ATOM | 1794 | H   | PHE | 114 | 9.780  | 7.873  | -6.453 | 1.00 | 0.00 |
| ATOM | 1795 | CA  | PHE | 114 | 9.378  | 6.664  | -4.744 | 1.00 | 0.00 |
| ATOM | 1796 | HA  | PHE | 114 | 10.125 | 6.802  | -3.962 | 1.00 | 0.00 |

|      |      |     |     |     |        |         |        |      |      |
|------|------|-----|-----|-----|--------|---------|--------|------|------|
| ATOM | 1797 | CB  | PHE | 114 | 8.203  | 7.605   | -4.469 | 1.00 | 0.00 |
| ATOM | 1798 | HB2 | PHE | 114 | 8.491  | 8.654   | -4.539 | 1.00 | 0.00 |
| ATOM | 1799 | HB3 | PHE | 114 | 7.362  | 7.414   | -5.135 | 1.00 | 0.00 |
| ATOM | 1800 | CG  | PHE | 114 | 7.697  | 7.389   | -3.060 | 1.00 | 0.00 |
| ATOM | 1801 | CD1 | PHE | 114 | 8.305  | 8.057   | -1.989 | 1.00 | 0.00 |
| ATOM | 1802 | HD1 | PHE | 114 | 9.143  | 8.730   | -2.170 | 1.00 | 0.00 |
| ATOM | 1803 | CE1 | PHE | 114 | 7.836  | 7.859   | -0.685 | 1.00 | 0.00 |
| ATOM | 1804 | HE1 | PHE | 114 | 8.309  | 8.379   | 0.148  | 1.00 | 0.00 |
| ATOM | 1805 | CZ  | PHE | 114 | 6.762  | 6.994   | -0.450 | 1.00 | 0.00 |
| ATOM | 1806 | HZ  | PHE | 114 | 6.399  | 6.840   | 0.566  | 1.00 | 0.00 |
| ATOM | 1807 | CE2 | PHE | 114 | 6.154  | 6.326   | -1.520 | 1.00 | 0.00 |
| ATOM | 1808 | HE2 | PHE | 114 | 5.318  | 5.652   | -1.337 | 1.00 | 0.00 |
| ATOM | 1809 | CD2 | PHE | 114 | 6.621  | 6.524   | -2.825 | 1.00 | 0.00 |
| ATOM | 1810 | HD2 | PHE | 114 | 6.147  | 6.005   | -3.658 | 1.00 | 0.00 |
| ATOM | 1811 | C   | PHE | 114 | 8.898  | 5.213   | -4.671 | 1.00 | 0.00 |
| ATOM | 1812 | O   | PHE | 114 | 9.299  | 4.524   | -3.748 | 1.00 | 0.00 |
| ATOM | 1813 | OXT | PHE | 114 | 8.136  | 4.815   | -5.538 | 1.00 | 0.00 |
| TER  |      |     |     |     |        |         |        |      |      |
| ATOM | 1814 | S1  | LIG | 115 | 16.459 | -12.786 | -5.790 | 1.00 | 0.00 |
| ATOM | 1815 | O1  | LIG | 115 | 16.631 | -14.160 | -4.946 | 1.00 | 0.00 |
| ATOM | 1816 | O2  | LIG | 115 | 17.812 | -12.920 | -6.663 | 1.00 | 0.00 |
| ATOM | 1817 | H26 | LIG | 115 | 18.580 | -12.717 | -6.108 | 1.00 | 0.00 |

|      |      |     |     |     |        |         |        |      |      |
|------|------|-----|-----|-----|--------|---------|--------|------|------|
| ATOM | 1818 | O3  | LIG | 115 | 15.362 | -12.903 | -6.718 | 1.00 | 0.00 |
| ATOM | 1819 | O4  | LIG | 115 | 16.573 | -11.658 | -4.887 | 1.00 | 0.00 |
| ATOM | 1820 | C1  | LIG | 115 | 14.408 | -19.446 | -0.086 | 1.00 | 0.00 |
| ATOM | 1821 | H1  | LIG | 115 | 14.605 | -20.214 | -0.844 | 1.00 | 0.00 |
| ATOM | 1822 | H2  | LIG | 115 | 15.345 | -19.324 | 0.473  | 1.00 | 0.00 |
| ATOM | 1823 | C2  | LIG | 115 | 13.314 | -19.944 | 0.866  | 1.00 | 0.00 |
| ATOM | 1824 | H3  | LIG | 115 | 12.378 | -20.068 | 0.308  | 1.00 | 0.00 |
| ATOM | 1825 | H4  | LIG | 115 | 13.117 | -19.176 | 1.625  | 1.00 | 0.00 |
| ATOM | 1826 | C3  | LIG | 115 | 14.058 | -18.127 | -0.782 | 1.00 | 0.00 |
| ATOM | 1827 | H5  | LIG | 115 | 13.863 | -17.357 | -0.023 | 1.00 | 0.00 |
| ATOM | 1828 | H6  | LIG | 115 | 13.120 | -18.249 | -1.339 | 1.00 | 0.00 |
| ATOM | 1829 | C4  | LIG | 115 | 13.663 | -21.264 | 1.565  | 1.00 | 0.00 |
| ATOM | 1830 | H7  | LIG | 115 | 14.599 | -21.141 | 2.124  | 1.00 | 0.00 |
| ATOM | 1831 | H8  | LIG | 115 | 13.862 | -22.033 | 0.807  | 1.00 | 0.00 |
| ATOM | 1832 | C5  | LIG | 115 | 15.150 | -17.630 | -1.737 | 1.00 | 0.00 |
| ATOM | 1833 | H9  | LIG | 115 | 16.089 | -17.509 | -1.182 | 1.00 | 0.00 |
| ATOM | 1834 | H10 | LIG | 115 | 15.343 | -18.396 | -2.498 | 1.00 | 0.00 |
| ATOM | 1835 | C6  | LIG | 115 | 12.569 | -21.763 | 2.516  | 1.00 | 0.00 |
| ATOM | 1836 | H11 | LIG | 115 | 11.633 | -21.886 | 1.957  | 1.00 | 0.00 |
| ATOM | 1837 | H12 | LIG | 115 | 12.371 | -20.994 | 3.275  | 1.00 | 0.00 |
| ATOM | 1838 | C7  | LIG | 115 | 14.798 | -16.308 | -2.429 | 1.00 | 0.00 |
| ATOM | 1839 | H13 | LIG | 115 | 13.857 | -16.429 | -2.982 | 1.00 | 0.00 |

|      |      |     |     |     |         |         |        |      |      |
|------|------|-----|-----|-----|---------|---------|--------|------|------|
| ATOM | 1840 | H14 | LIG | 115 | 14.610  | -15.541 | -1.667 | 1.00 | 0.00 |
| ATOM | 1841 | C8  | LIG | 115 | 12.917  | -23.082 | 3.215  | 1.00 | 0.00 |
| ATOM | 1842 | H15 | LIG | 115 | 13.115  | -23.853 | 2.457  | 1.00 | 0.00 |
| ATOM | 1843 | H16 | LIG | 115 | 13.854  | -22.960 | 3.773  | 1.00 | 0.00 |
| ATOM | 1844 | C9  | LIG | 115 | 15.896  | -15.824 | -3.386 | 1.00 | 0.00 |
| ATOM | 1845 | H17 | LIG | 115 | 16.075  | -16.575 | -4.162 | 1.00 | 0.00 |
| ATOM | 1846 | H18 | LIG | 115 | 16.836  | -15.694 | -2.841 | 1.00 | 0.00 |
| ATOM | 1847 | C10 | LIG | 115 | 11.824  | -23.583 | 4.166  | 1.00 | 0.00 |
| ATOM | 1848 | H19 | LIG | 115 | 10.888  | -23.704 | 3.608  | 1.00 | 0.00 |
| ATOM | 1849 | H20 | LIG | 115 | 11.627  | -22.814 | 4.924  | 1.00 | 0.00 |
| ATOM | 1850 | C11 | LIG | 115 | 15.525  | -14.513 | -4.050 | 1.00 | 0.00 |
| ATOM | 1851 | H21 | LIG | 115 | 14.616  | -14.606 | -4.650 | 1.00 | 0.00 |
| ATOM | 1852 | H22 | LIG | 115 | 15.401  | -13.708 | -3.321 | 1.00 | 0.00 |
| ATOM | 1853 | C12 | LIG | 115 | 12.181  | -24.902 | 4.859  | 1.00 | 0.00 |
| ATOM | 1854 | H23 | LIG | 115 | 13.095  | -24.801 | 5.453  | 1.00 | 0.00 |
| ATOM | 1855 | H24 | LIG | 115 | 11.383  | -25.229 | 5.530  | 1.00 | 0.00 |
| ATOM | 1856 | H25 | LIG | 115 | 12.348  | -25.699 | 4.128  | 1.00 | 0.00 |
| TER  |      |     |     |     |         |         |        |      |      |
| ATOM | 1857 | S1  | LIG | 116 | -21.339 | 12.666  | 5.442  | 1.00 | 0.00 |
| ATOM | 1858 | O1  | LIG | 116 | -21.283 | 14.045  | 6.293  | 1.00 | 0.00 |
| ATOM | 1859 | O2  | LIG | 116 | -20.157 | 11.899  | 6.232  | 1.00 | 0.00 |
| ATOM | 1860 | H26 | LIG | 116 | -19.298 | 12.261  | 5.966  | 1.00 | 0.00 |

|      |      |     |     |     |         |        |       |      |      |
|------|------|-----|-----|-----|---------|--------|-------|------|------|
| ATOM | 1861 | O3  | LIG | 116 | -22.555 | 11.949 | 5.733 | 1.00 | 0.00 |
| ATOM | 1862 | O4  | LIG | 116 | -20.921 | 12.933 | 4.081 | 1.00 | 0.00 |
| ATOM | 1863 | C1  | LIG | 116 | -23.667 | 20.902 | 8.244 | 1.00 | 0.00 |
| ATOM | 1864 | H1  | LIG | 116 | -23.702 | 20.583 | 9.293 | 1.00 | 0.00 |
| ATOM | 1865 | H2  | LIG | 116 | -22.656 | 21.298 | 8.081 | 1.00 | 0.00 |
| ATOM | 1866 | C2  | LIG | 116 | -24.689 | 22.024 | 8.022 | 1.00 | 0.00 |
| ATOM | 1867 | H3  | LIG | 116 | -25.700 | 21.629 | 8.186 | 1.00 | 0.00 |
| ATOM | 1868 | H4  | LIG | 116 | -24.654 | 22.343 | 6.973 | 1.00 | 0.00 |
| ATOM | 1869 | C3  | LIG | 116 | -23.886 | 19.687 | 7.337 | 1.00 | 0.00 |
| ATOM | 1870 | H5  | LIG | 116 | -23.849 | 20.007 | 6.287 | 1.00 | 0.00 |
| ATOM | 1871 | H6  | LIG | 116 | -24.898 | 19.293 | 7.499 | 1.00 | 0.00 |
| ATOM | 1872 | C4  | LIG | 116 | -24.471 | 23.241 | 8.928 | 1.00 | 0.00 |
| ATOM | 1873 | H7  | LIG | 116 | -23.460 | 23.637 | 8.764 | 1.00 | 0.00 |
| ATOM | 1874 | H8  | LIG | 116 | -24.504 | 22.922 | 9.977 | 1.00 | 0.00 |
| ATOM | 1875 | C5  | LIG | 116 | -22.867 | 18.564 | 7.560 | 1.00 | 0.00 |
| ATOM | 1876 | H9  | LIG | 116 | -21.854 | 18.957 | 7.401 | 1.00 | 0.00 |
| ATOM | 1877 | H10 | LIG | 116 | -22.906 | 18.241 | 8.608 | 1.00 | 0.00 |
| ATOM | 1878 | C6  | LIG | 116 | -25.493 | 24.362 | 8.707 | 1.00 | 0.00 |
| ATOM | 1879 | H11 | LIG | 116 | -26.503 | 23.967 | 8.870 | 1.00 | 0.00 |
| ATOM | 1880 | H12 | LIG | 116 | -25.459 | 24.682 | 7.657 | 1.00 | 0.00 |
| ATOM | 1881 | C7  | LIG | 116 | -23.087 | 17.351 | 6.650 | 1.00 | 0.00 |
| ATOM | 1882 | H13 | LIG | 116 | -24.101 | 16.961 | 6.808 | 1.00 | 0.00 |

|      |      |     |     |     |         |        |        |      |      |
|------|------|-----|-----|-----|---------|--------|--------|------|------|
| ATOM | 1883 | H14 | LIG | 116 | -23.042 | 17.674 | 5.602  | 1.00 | 0.00 |
| ATOM | 1884 | C8  | LIG | 116 | -25.276 | 25.580 | 9.612  | 1.00 | 0.00 |
| ATOM | 1885 | H15 | LIG | 116 | -25.310 | 25.262 | 10.663 | 1.00 | 0.00 |
| ATOM | 1886 | H16 | LIG | 116 | -24.264 | 25.976 | 9.450  | 1.00 | 0.00 |
| ATOM | 1887 | C9  | LIG | 116 | -22.064 | 16.233 | 6.887  | 1.00 | 0.00 |
| ATOM | 1888 | H17 | LIG | 116 | -22.117 | 15.889 | 7.925  | 1.00 | 0.00 |
| ATOM | 1889 | H18 | LIG | 116 | -21.050 | 16.612 | 6.724  | 1.00 | 0.00 |
| ATOM | 1890 | C10 | LIG | 116 | -26.297 | 26.702 | 9.393  | 1.00 | 0.00 |
| ATOM | 1891 | H19 | LIG | 116 | -27.307 | 26.306 | 9.555  | 1.00 | 0.00 |
| ATOM | 1892 | H20 | LIG | 116 | -26.261 | 27.021 | 8.344  | 1.00 | 0.00 |
| ATOM | 1893 | C11 | LIG | 116 | -22.301 | 15.050 | 5.968  | 1.00 | 0.00 |
| ATOM | 1894 | H21 | LIG | 116 | -23.285 | 14.603 | 6.129  | 1.00 | 0.00 |
| ATOM | 1895 | H22 | LIG | 116 | -22.192 | 15.324 | 4.915  | 1.00 | 0.00 |
| ATOM | 1896 | C12 | LIG | 116 | -26.072 | 27.913 | 10.302 | 1.00 | 0.00 |
| ATOM | 1897 | H23 | LIG | 116 | -25.082 | 28.352 | 10.138 | 1.00 | 0.00 |
| ATOM | 1898 | H24 | LIG | 116 | -26.814 | 28.694 | 10.120 | 1.00 | 0.00 |
| ATOM | 1899 | H25 | LIG | 116 | -26.137 | 27.633 | 11.358 | 1.00 | 0.00 |
| TER  |      |     |     |     |         |        |        |      |      |
| ATOM | 1900 | S1  | LIG | 117 | 10.662  | -9.386 | 25.795 | 1.00 | 0.00 |
| ATOM | 1901 | O1  | LIG | 117 | 11.743  | -8.464 | 25.014 | 1.00 | 0.00 |
| ATOM | 1902 | O2  | LIG | 117 | 9.349   | -8.538 | 25.390 | 1.00 | 0.00 |
| ATOM | 1903 | H26 | LIG | 117 | 9.318   | -7.717 | 25.905 | 1.00 | 0.00 |

|      |      |     |     |     |        |         |        |      |      |
|------|------|-----|-----|-----|--------|---------|--------|------|------|
| ATOM | 1904 | O3  | LIG | 117 | 10.536 | -10.667 | 25.147 | 1.00 | 0.00 |
| ATOM | 1905 | O4  | LIG | 117 | 10.890 | -9.277  | 27.222 | 1.00 | 0.00 |
| ATOM | 1906 | C1  | LIG | 117 | 18.614 | -6.733  | 22.505 | 1.00 | 0.00 |
| ATOM | 1907 | H1  | LIG | 117 | 18.209 | -6.630  | 21.491 | 1.00 | 0.00 |
| ATOM | 1908 | H2  | LIG | 117 | 18.532 | -5.742  | 22.968 | 1.00 | 0.00 |
| ATOM | 1909 | C2  | LIG | 117 | 20.094 | -7.128  | 22.421 | 1.00 | 0.00 |
| ATOM | 1910 | H3  | LIG | 117 | 20.177 | -8.120  | 21.958 | 1.00 | 0.00 |
| ATOM | 1911 | H4  | LIG | 117 | 20.499 | -7.232  | 23.436 | 1.00 | 0.00 |
| ATOM | 1912 | C3  | LIG | 117 | 17.759 | -7.732  | 23.293 | 1.00 | 0.00 |
| ATOM | 1913 | H5  | LIG | 117 | 18.163 | -7.833  | 24.308 | 1.00 | 0.00 |
| ATOM | 1914 | H6  | LIG | 117 | 17.845 | -8.724  | 22.831 | 1.00 | 0.00 |
| ATOM | 1915 | C4  | LIG | 117 | 20.952 | -6.130  | 21.634 | 1.00 | 0.00 |
| ATOM | 1916 | H7  | LIG | 117 | 20.869 | -5.138  | 22.098 | 1.00 | 0.00 |
| ATOM | 1917 | H8  | LIG | 117 | 20.546 | -6.025  | 20.620 | 1.00 | 0.00 |
| ATOM | 1918 | C5  | LIG | 117 | 16.280 | -7.339  | 23.375 | 1.00 | 0.00 |
| ATOM | 1919 | H9  | LIG | 117 | 16.193 | -6.346  | 23.834 | 1.00 | 0.00 |
| ATOM | 1920 | H10 | LIG | 117 | 15.873 | -7.241  | 22.360 | 1.00 | 0.00 |
| ATOM | 1921 | C6  | LIG | 117 | 22.431 | -6.525  | 21.549 | 1.00 | 0.00 |
| ATOM | 1922 | H11 | LIG | 117 | 22.513 | -7.517  | 21.086 | 1.00 | 0.00 |
| ATOM | 1923 | H12 | LIG | 117 | 22.837 | -6.630  | 22.564 | 1.00 | 0.00 |
| ATOM | 1924 | C7  | LIG | 117 | 15.428 | -8.338  | 24.165 | 1.00 | 0.00 |
| ATOM | 1925 | H13 | LIG | 117 | 15.517 | -9.331  | 23.706 | 1.00 | 0.00 |



|      |      |     |     |     |        |        |        |      |      |
|------|------|-----|-----|-----|--------|--------|--------|------|------|
| ATOM | 1926 | H14 | LIG | 117 | 15.831 | -8.432 | 25.181 | 1.00 | 0.00 |
| ATOM | 1927 | C8  | LIG | 117 | 23.289 | -5.528 | 20.763 | 1.00 | 0.00 |
| ATOM | 1928 | H15 | LIG | 117 | 22.885 | -5.423 | 19.747 | 1.00 | 0.00 |
| ATOM | 1929 | H16 | LIG | 117 | 23.206 | -4.535 | 21.225 | 1.00 | 0.00 |
| ATOM | 1930 | C9  | LIG | 117 | 13.948 | -7.937 | 24.235 | 1.00 | 0.00 |
| ATOM | 1931 | H17 | LIG | 117 | 13.531 | -7.862 | 23.225 | 1.00 | 0.00 |
| ATOM | 1932 | H18 | LIG | 117 | 13.849 | -6.950 | 24.698 | 1.00 | 0.00 |
| ATOM | 1933 | C10 | LIG | 117 | 24.768 | -5.921 | 20.677 | 1.00 | 0.00 |
| ATOM | 1934 | H19 | LIG | 117 | 24.850 | -6.913 | 20.215 | 1.00 | 0.00 |
| ATOM | 1935 | H20 | LIG | 117 | 25.173 | -6.025 | 21.691 | 1.00 | 0.00 |
| ATOM | 1936 | C11 | LIG | 117 | 13.131 | -8.938 | 25.029 | 1.00 | 0.00 |
| ATOM | 1937 | H21 | LIG | 117 | 13.157 | -9.932 | 24.575 | 1.00 | 0.00 |
| ATOM | 1938 | H22 | LIG | 117 | 13.463 | -9.001 | 26.068 | 1.00 | 0.00 |
| ATOM | 1939 | C12 | LIG | 117 | 25.617 | -4.919 | 19.889 | 1.00 | 0.00 |
| ATOM | 1940 | H23 | LIG | 117 | 25.581 | -3.925 | 20.346 | 1.00 | 0.00 |
| ATOM | 1941 | H24 | LIG | 117 | 26.665 | -5.228 | 19.848 | 1.00 | 0.00 |
| ATOM | 1942 | H25 | LIG | 117 | 25.259 | -4.821 | 18.859 | 1.00 | 0.00 |
| TER  |      |     |     |     |        |        |        |      |      |
| ATOM | 1943 | S1  | LIG | 118 | 9.754  | 27.226 | -7.170 | 1.00 | 0.00 |
| ATOM | 1944 | O1  | LIG | 118 | 10.381 | 26.308 | -5.989 | 1.00 | 0.00 |
| ATOM | 1945 | O2  | LIG | 118 | 10.654 | 26.638 | -8.375 | 1.00 | 0.00 |
| ATOM | 1946 | H26 | LIG | 118 | 11.556 | 26.987 | -8.311 | 1.00 | 0.00 |

|      |      |     |     |     |        |        |        |      |      |
|------|------|-----|-----|-----|--------|--------|--------|------|------|
| ATOM | 1947 | O3  | LIG | 118 | 8.396  | 26.830 | -7.444 | 1.00 | 0.00 |
| ATOM | 1948 | O4  | LIG | 118 | 10.108 | 28.611 | -6.931 | 1.00 | 0.00 |
| ATOM | 1949 | C1  | LIG | 118 | 10.803 | 23.668 | 1.037  | 1.00 | 0.00 |
| ATOM | 1950 | H1  | LIG | 118 | 10.755 | 22.644 | 0.646  | 1.00 | 0.00 |
| ATOM | 1951 | H2  | LIG | 118 | 11.868 | 23.932 | 1.070  | 1.00 | 0.00 |
| ATOM | 1952 | C2  | LIG | 118 | 10.233 | 23.693 | 2.460  | 1.00 | 0.00 |
| ATOM | 1953 | H3  | LIG | 118 | 9.168  | 23.429 | 2.428  | 1.00 | 0.00 |
| ATOM | 1954 | H4  | LIG | 118 | 10.279 | 24.718 | 2.851  | 1.00 | 0.00 |
| ATOM | 1955 | C3  | LIG | 118 | 10.078 | 24.612 | 0.071  | 1.00 | 0.00 |
| ATOM | 1956 | H5  | LIG | 118 | 10.127 | 25.638 | 0.461  | 1.00 | 0.00 |
| ATOM | 1957 | H6  | LIG | 118 | 9.012  | 24.349 | 0.040  | 1.00 | 0.00 |
| ATOM | 1958 | C4  | LIG | 118 | 10.957 | 22.751 | 3.428  | 1.00 | 0.00 |
| ATOM | 1959 | H7  | LIG | 118 | 12.022 | 23.016 | 3.462  | 1.00 | 0.00 |
| ATOM | 1960 | H8  | LIG | 118 | 10.912 | 21.726 | 3.037  | 1.00 | 0.00 |
| ATOM | 1961 | C5  | LIG | 118 | 10.645 | 24.585 | -1.353 | 1.00 | 0.00 |
| ATOM | 1962 | H9  | LIG | 118 | 11.711 | 24.845 | -1.323 | 1.00 | 0.00 |
| ATOM | 1963 | H10 | LIG | 118 | 10.593 | 23.562 | -1.745 | 1.00 | 0.00 |
| ATOM | 1964 | C6  | LIG | 118 | 10.387 | 22.775 | 4.851  | 1.00 | 0.00 |
| ATOM | 1965 | H11 | LIG | 118 | 9.322  | 22.511 | 4.818  | 1.00 | 0.00 |
| ATOM | 1966 | H12 | LIG | 118 | 10.433 | 23.800 | 5.242  | 1.00 | 0.00 |
| ATOM | 1967 | C7  | LIG | 118 | 9.920  | 25.532 | -2.315 | 1.00 | 0.00 |
| ATOM | 1968 | H13 | LIG | 118 | 8.854  | 25.273 | -2.342 | 1.00 | 0.00 |

|      |      |     |     |     |         |        |         |      |      |
|------|------|-----|-----|-----|---------|--------|---------|------|------|
| ATOM | 1969 | H14 | LIG | 118 | 9.977   | 26.556 | -1.925  | 1.00 | 0.00 |
| ATOM | 1970 | C8  | LIG | 118 | 11.110  | 21.833 | 5.820   | 1.00 | 0.00 |
| ATOM | 1971 | H15 | LIG | 118 | 11.065  | 20.807 | 5.430   | 1.00 | 0.00 |
| ATOM | 1972 | H16 | LIG | 118 | 12.176  | 22.096 | 5.852   | 1.00 | 0.00 |
| ATOM | 1973 | C9  | LIG | 118 | 10.493  | 25.492 | -3.738  | 1.00 | 0.00 |
| ATOM | 1974 | H17 | LIG | 118 | 10.421  | 24.477 | -4.144  | 1.00 | 0.00 |
| ATOM | 1975 | H18 | LIG | 118 | 11.556  | 25.757 | -3.721  | 1.00 | 0.00 |
| ATOM | 1976 | C10 | LIG | 118 | 10.542  | 21.856 | 7.243   | 1.00 | 0.00 |
| ATOM | 1977 | H19 | LIG | 118 | 9.477   | 21.593 | 7.209   | 1.00 | 0.00 |
| ATOM | 1978 | H20 | LIG | 118 | 10.589  | 22.880 | 7.633   | 1.00 | 0.00 |
| ATOM | 1979 | C11 | LIG | 118 | 9.762   | 26.443 | -4.666  | 1.00 | 0.00 |
| ATOM | 1980 | H21 | LIG | 118 | 8.704   | 26.187 | -4.756  | 1.00 | 0.00 |
| ATOM | 1981 | H22 | LIG | 118 | 9.862   | 27.483 | -4.343  | 1.00 | 0.00 |
| ATOM | 1982 | C12 | LIG | 118 | 11.271  | 20.910 | 8.202   | 1.00 | 0.00 |
| ATOM | 1983 | H23 | LIG | 118 | 12.331  | 21.170 | 8.283   | 1.00 | 0.00 |
| ATOM | 1984 | H24 | LIG | 118 | 10.842  | 20.952 | 9.207   | 1.00 | 0.00 |
| ATOM | 1985 | H25 | LIG | 118 | 11.211  | 19.874 | 7.858   | 1.00 | 0.00 |
| TER  |      |     |     |     |         |        |         |      |      |
| ATOM | 1986 | S1  | LIG | 119 | -24.976 | 19.284 | -10.074 | 1.00 | 0.00 |
| ATOM | 1987 | O1  | LIG | 119 | -25.293 | 19.923 | -11.530 | 1.00 | 0.00 |
| ATOM | 1988 | O2  | LIG | 119 | -25.517 | 20.524 | -9.193  | 1.00 | 0.00 |
| ATOM | 1989 | H26 | LIG | 119 | -24.881 | 21.255 | -9.231  | 1.00 | 0.00 |

|      |      |     |     |     |         |        |         |      |      |
|------|------|-----|-----|-----|---------|--------|---------|------|------|
| ATOM | 1990 | O3  | LIG | 119 | -25.862 | 18.178 | -9.810  | 1.00 | 0.00 |
| ATOM | 1991 | O4  | LIG | 119 | -23.541 | 19.162 | -9.914  | 1.00 | 0.00 |
| ATOM | 1992 | C1  | LIG | 119 | -25.734 | 19.796 | -19.034 | 1.00 | 0.00 |
| ATOM | 1993 | H1  | LIG | 119 | -26.778 | 20.126 | -18.970 | 1.00 | 0.00 |
| ATOM | 1994 | H2  | LIG | 119 | -25.128 | 20.710 | -19.083 | 1.00 | 0.00 |
| ATOM | 1995 | C2  | LIG | 119 | -25.536 | 18.991 | -20.323 | 1.00 | 0.00 |
| ATOM | 1996 | H3  | LIG | 119 | -26.142 | 18.077 | -20.275 | 1.00 | 0.00 |
| ATOM | 1997 | H4  | LIG | 119 | -24.491 | 18.659 | -20.388 | 1.00 | 0.00 |
| ATOM | 1998 | C3  | LIG | 119 | -25.371 | 19.017 | -17.765 | 1.00 | 0.00 |
| ATOM | 1999 | H5  | LIG | 119 | -24.325 | 18.688 | -17.828 | 1.00 | 0.00 |
| ATOM | 2000 | H6  | LIG | 119 | -25.975 | 18.101 | -17.718 | 1.00 | 0.00 |
| ATOM | 2001 | C4  | LIG | 119 | -25.897 | 19.768 | -21.594 | 1.00 | 0.00 |
| ATOM | 2002 | H7  | LIG | 119 | -25.291 | 20.683 | -21.644 | 1.00 | 0.00 |
| ATOM | 2003 | H8  | LIG | 119 | -26.941 | 20.101 | -21.530 | 1.00 | 0.00 |
| ATOM | 2004 | C5  | LIG | 119 | -25.571 | 19.820 | -16.475 | 1.00 | 0.00 |
| ATOM | 2005 | H9  | LIG | 119 | -24.970 | 20.737 | -16.522 | 1.00 | 0.00 |
| ATOM | 2006 | H10 | LIG | 119 | -26.617 | 20.146 | -16.409 | 1.00 | 0.00 |
| ATOM | 2007 | C6  | LIG | 119 | -25.701 | 18.963 | -22.884 | 1.00 | 0.00 |
| ATOM | 2008 | H11 | LIG | 119 | -26.306 | 18.049 | -22.835 | 1.00 | 0.00 |
| ATOM | 2009 | H12 | LIG | 119 | -24.656 | 18.631 | -22.948 | 1.00 | 0.00 |
| ATOM | 2010 | C7  | LIG | 119 | -25.205 | 19.039 | -15.208 | 1.00 | 0.00 |
| ATOM | 2011 | H13 | LIG | 119 | -25.805 | 18.122 | -15.163 | 1.00 | 0.00 |

|      |      |     |     |     |         |        |         |      |      |
|------|------|-----|-----|-----|---------|--------|---------|------|------|
| ATOM | 2012 | H14 | LIG | 119 | -24.157 | 18.719 | -15.272 | 1.00 | 0.00 |
| ATOM | 2013 | C8  | LIG | 119 | -26.062 | 19.740 | -24.155 | 1.00 | 0.00 |
| ATOM | 2014 | H15 | LIG | 119 | -27.107 | 20.072 | -24.093 | 1.00 | 0.00 |
| ATOM | 2015 | H16 | LIG | 119 | -25.457 | 20.655 | -24.204 | 1.00 | 0.00 |
| ATOM | 2016 | C9  | LIG | 119 | -25.415 | 19.853 | -13.924 | 1.00 | 0.00 |
| ATOM | 2017 | H17 | LIG | 119 | -26.463 | 20.159 | -13.840 | 1.00 | 0.00 |
| ATOM | 2018 | H18 | LIG | 119 | -24.814 | 20.767 | -13.956 | 1.00 | 0.00 |
| ATOM | 2019 | C10 | LIG | 119 | -25.866 | 18.936 | -25.446 | 1.00 | 0.00 |
| ATOM | 2020 | H19 | LIG | 119 | -26.470 | 18.022 | -25.396 | 1.00 | 0.00 |
| ATOM | 2021 | H20 | LIG | 119 | -24.822 | 18.606 | -25.509 | 1.00 | 0.00 |
| ATOM | 2022 | C11 | LIG | 119 | -25.038 | 19.059 | -12.688 | 1.00 | 0.00 |
| ATOM | 2023 | H21 | LIG | 119 | -25.648 | 18.159 | -12.583 | 1.00 | 0.00 |
| ATOM | 2024 | H22 | LIG | 119 | -23.979 | 18.785 | -12.688 | 1.00 | 0.00 |
| ATOM | 2025 | C12 | LIG | 119 | -26.230 | 19.721 | -26.710 | 1.00 | 0.00 |
| ATOM | 2026 | H23 | LIG | 119 | -25.618 | 20.624 | -26.804 | 1.00 | 0.00 |
| ATOM | 2027 | H24 | LIG | 119 | -26.078 | 19.121 | -27.611 | 1.00 | 0.00 |
| ATOM | 2028 | H25 | LIG | 119 | -27.278 | 20.034 | -26.692 | 1.00 | 0.00 |
| TER  |      |     |     |     |         |        |         |      |      |
| ATOM | 2029 | S1  | LIG | 120 | -3.728  | 10.132 | -23.690 | 1.00 | 0.00 |
| ATOM | 2030 | O1  | LIG | 120 | -4.159  | 9.413  | -22.302 | 1.00 | 0.00 |
| ATOM | 2031 | O2  | LIG | 120 | -2.136  | 9.908  | -23.543 | 1.00 | 0.00 |
| ATOM | 2032 | H26 | LIG | 120 | -1.779  | 10.522 | -22.883 | 1.00 | 0.00 |

|      |      |     |     |     |         |        |         |      |      |
|------|------|-----|-----|-----|---------|--------|---------|------|------|
| ATOM | 2033 | O3  | LIG | 120 | -4.149  | 9.337  | -24.816 | 1.00 | 0.00 |
| ATOM | 2034 | O4  | LIG | 120 | -4.031  | 11.547 | -23.604 | 1.00 | 0.00 |
| ATOM | 2035 | C1  | LIG | 120 | -9.098  | 6.760  | -17.294 | 1.00 | 0.00 |
| ATOM | 2036 | H1  | LIG | 120 | -8.585  | 5.791  | -17.314 | 1.00 | 0.00 |
| ATOM | 2037 | H2  | LIG | 120 | -8.610  | 7.347  | -16.505 | 1.00 | 0.00 |
| ATOM | 2038 | C2  | LIG | 120 | -10.571 | 6.546  | -16.925 | 1.00 | 0.00 |
| ATOM | 2039 | H3  | LIG | 120 | -11.059 | 5.959  | -17.713 | 1.00 | 0.00 |
| ATOM | 2040 | H4  | LIG | 120 | -11.085 | 7.516  | -16.906 | 1.00 | 0.00 |
| ATOM | 2041 | C3  | LIG | 120 | -8.902  | 7.464  | -18.642 | 1.00 | 0.00 |
| ATOM | 2042 | H5  | LIG | 120 | -9.414  | 8.435  | -18.621 | 1.00 | 0.00 |
| ATOM | 2043 | H6  | LIG | 120 | -9.393  | 6.879  | -19.430 | 1.00 | 0.00 |
| ATOM | 2044 | C4  | LIG | 120 | -10.770 | 5.843  | -15.577 | 1.00 | 0.00 |
| ATOM | 2045 | H7  | LIG | 120 | -10.282 | 6.430  | -14.787 | 1.00 | 0.00 |
| ATOM | 2046 | H8  | LIG | 120 | -10.255 | 4.874  | -15.595 | 1.00 | 0.00 |
| ATOM | 2047 | C5  | LIG | 120 | -7.430  | 7.676  | -19.013 | 1.00 | 0.00 |
| ATOM | 2048 | H9  | LIG | 120 | -6.937  | 8.259  | -18.224 | 1.00 | 0.00 |
| ATOM | 2049 | H10 | LIG | 120 | -6.918  | 6.706  | -19.038 | 1.00 | 0.00 |
| ATOM | 2050 | C6  | LIG | 120 | -12.242 | 5.627  | -15.208 | 1.00 | 0.00 |
| ATOM | 2051 | H11 | LIG | 120 | -12.730 | 5.041  | -15.997 | 1.00 | 0.00 |
| ATOM | 2052 | H12 | LIG | 120 | -12.756 | 6.597  | -15.189 | 1.00 | 0.00 |
| ATOM | 2053 | C7  | LIG | 120 | -7.237  | 8.383  | -20.359 | 1.00 | 0.00 |
| ATOM | 2054 | H13 | LIG | 120 | -7.732  | 7.800  | -21.147 | 1.00 | 0.00 |

|      |      |     |     |     |         |         |         |      |      |
|------|------|-----|-----|-----|---------|---------|---------|------|------|
| ATOM | 2055 | H14 | LIG | 120 | -7.745  | 9.355   | -20.332 | 1.00 | 0.00 |
| ATOM | 2056 | C8  | LIG | 120 | -12.441 | 4.925   | -13.860 | 1.00 | 0.00 |
| ATOM | 2057 | H15 | LIG | 120 | -11.928 | 3.954   | -13.877 | 1.00 | 0.00 |
| ATOM | 2058 | H16 | LIG | 120 | -11.953 | 5.511   | -13.071 | 1.00 | 0.00 |
| ATOM | 2059 | C9  | LIG | 120 | -5.760  | 8.584   | -20.722 | 1.00 | 0.00 |
| ATOM | 2060 | H17 | LIG | 120 | -5.250  | 7.616   | -20.772 | 1.00 | 0.00 |
| ATOM | 2061 | H18 | LIG | 120 | -5.260  | 9.171   | -19.945 | 1.00 | 0.00 |
| ATOM | 2062 | C10 | LIG | 120 | -13.913 | 4.708   | -13.489 | 1.00 | 0.00 |
| ATOM | 2063 | H19 | LIG | 120 | -14.401 | 4.123   | -14.279 | 1.00 | 0.00 |
| ATOM | 2064 | H20 | LIG | 120 | -14.426 | 5.678   | -13.470 | 1.00 | 0.00 |
| ATOM | 2065 | C11 | LIG | 120 | -5.599  | 9.291   | -22.054 | 1.00 | 0.00 |
| ATOM | 2066 | H21 | LIG | 120 | -6.039  | 8.717   | -22.873 | 1.00 | 0.00 |
| ATOM | 2067 | H22 | LIG | 120 | -6.032  | 10.295  | -22.036 | 1.00 | 0.00 |
| ATOM | 2068 | C12 | LIG | 120 | -14.101 | 4.005   | -12.142 | 1.00 | 0.00 |
| ATOM | 2069 | H23 | LIG | 120 | -13.653 | 4.584   | -11.328 | 1.00 | 0.00 |
| ATOM | 2070 | H24 | LIG | 120 | -15.160 | 3.868   | -11.907 | 1.00 | 0.00 |
| ATOM | 2071 | H25 | LIG | 120 | -13.631 | 3.017   | -12.142 | 1.00 | 0.00 |
| TER  |      |     |     |     |         |         |         |      |      |
| ATOM | 2072 | S1  | LIG | 121 | -25.682 | -25.403 | -7.810  | 1.00 | 0.00 |
| ATOM | 2073 | O1  | LIG | 121 | -24.792 | -24.861 | -9.052  | 1.00 | 0.00 |
| ATOM | 2074 | O2  | LIG | 121 | -26.660 | -24.123 | -7.694  | 1.00 | 0.00 |
| ATOM | 2075 | H26 | LIG | 121 | -26.183 | -23.384 | -7.288  | 1.00 | 0.00 |

|      |      |     |     |     |         |         |         |      |      |
|------|------|-----|-----|-----|---------|---------|---------|------|------|
| ATOM | 2076 | O3  | LIG | 121 | -26.506 | -26.509 | -8.231  | 1.00 | 0.00 |
| ATOM | 2077 | O4  | LIG | 121 | -24.846 | -25.486 | -6.629  | 1.00 | 0.00 |
| ATOM | 2078 | C1  | LIG | 121 | -19.515 | -25.454 | -14.372 | 1.00 | 0.00 |
| ATOM | 2079 | H1  | LIG | 121 | -20.250 | -25.142 | -15.125 | 1.00 | 0.00 |
| ATOM | 2080 | H2  | LIG | 121 | -19.044 | -24.533 | -14.006 | 1.00 | 0.00 |
| ATOM | 2081 | C2  | LIG | 121 | -18.450 | -26.333 | -15.040 | 1.00 | 0.00 |
| ATOM | 2082 | H3  | LIG | 121 | -18.919 | -27.254 | -15.407 | 1.00 | 0.00 |
| ATOM | 2083 | H4  | LIG | 121 | -17.714 | -26.646 | -14.287 | 1.00 | 0.00 |
| ATOM | 2084 | C3  | LIG | 121 | -20.240 | -26.147 | -13.214 | 1.00 | 0.00 |
| ATOM | 2085 | H5  | LIG | 121 | -19.504 | -26.457 | -12.460 | 1.00 | 0.00 |
| ATOM | 2086 | H6  | LIG | 121 | -20.708 | -27.070 | -13.580 | 1.00 | 0.00 |
| ATOM | 2087 | C4  | LIG | 121 | -17.722 | -25.642 | -16.199 | 1.00 | 0.00 |
| ATOM | 2088 | H7  | LIG | 121 | -17.251 | -24.720 | -15.832 | 1.00 | 0.00 |
| ATOM | 2089 | H8  | LIG | 121 | -18.457 | -25.327 | -16.951 | 1.00 | 0.00 |
| ATOM | 2090 | C5  | LIG | 121 | -21.307 | -25.271 | -12.548 | 1.00 | 0.00 |
| ATOM | 2091 | H9  | LIG | 121 | -20.841 | -24.346 | -12.183 | 1.00 | 0.00 |
| ATOM | 2092 | H10 | LIG | 121 | -22.044 | -24.963 | -13.299 | 1.00 | 0.00 |
| ATOM | 2093 | C6  | LIG | 121 | -16.658 | -26.519 | -16.867 | 1.00 | 0.00 |
| ATOM | 2094 | H11 | LIG | 121 | -17.128 | -27.441 | -17.234 | 1.00 | 0.00 |
| ATOM | 2095 | H12 | LIG | 121 | -15.922 | -26.833 | -16.115 | 1.00 | 0.00 |
| ATOM | 2096 | C7  | LIG | 121 | -22.028 | -25.965 | -11.388 | 1.00 | 0.00 |
| ATOM | 2097 | H13 | LIG | 121 | -22.492 | -26.890 | -11.753 | 1.00 | 0.00 |



|      |      |     |     |     |         |         |         |      |      |
|------|------|-----|-----|-----|---------|---------|---------|------|------|
| ATOM | 2098 | H14 | LIG | 121 | -21.290 | -26.268 | -10.634 | 1.00 | 0.00 |
| ATOM | 2099 | C8  | LIG | 121 | -15.930 | -25.829 | -18.026 | 1.00 | 0.00 |
| ATOM | 2100 | H15 | LIG | 121 | -16.664 | -25.515 | -18.780 | 1.00 | 0.00 |
| ATOM | 2101 | H16 | LIG | 121 | -15.460 | -24.907 | -17.660 | 1.00 | 0.00 |
| ATOM | 2102 | C9  | LIG | 121 | -23.097 | -25.080 | -10.733 | 1.00 | 0.00 |
| ATOM | 2103 | H17 | LIG | 121 | -23.850 | -24.790 | -11.474 | 1.00 | 0.00 |
| ATOM | 2104 | H18 | LIG | 121 | -22.642 | -24.157 | -10.359 | 1.00 | 0.00 |
| ATOM | 2105 | C10 | LIG | 121 | -14.865 | -26.706 | -18.695 | 1.00 | 0.00 |
| ATOM | 2106 | H19 | LIG | 121 | -15.335 | -27.627 | -19.060 | 1.00 | 0.00 |
| ATOM | 2107 | H20 | LIG | 121 | -14.131 | -27.018 | -17.942 | 1.00 | 0.00 |
| ATOM | 2108 | C11 | LIG | 121 | -23.789 | -25.789 | -9.585  | 1.00 | 0.00 |
| ATOM | 2109 | H21 | LIG | 121 | -24.303 | -26.693 | -9.919  | 1.00 | 0.00 |
| ATOM | 2110 | H22 | LIG | 121 | -23.090 | -26.040 | -8.783  | 1.00 | 0.00 |
| ATOM | 2111 | C12 | LIG | 121 | -14.145 | -26.007 | -19.852 | 1.00 | 0.00 |
| ATOM | 2112 | H23 | LIG | 121 | -13.636 | -25.100 | -19.511 | 1.00 | 0.00 |
| ATOM | 2113 | H24 | LIG | 121 | -13.392 | -26.658 | -20.306 | 1.00 | 0.00 |
| ATOM | 2114 | H25 | LIG | 121 | -14.848 | -25.715 | -20.638 | 1.00 | 0.00 |
| TER  |      |     |     |     |         |         |         |      |      |
| ATOM | 2115 | S1  | LIG | 122 | -5.962  | -13.658 | -22.200 | 1.00 | 0.00 |
| ATOM | 2116 | O1  | LIG | 122 | -6.680  | -13.237 | -20.809 | 1.00 | 0.00 |
| ATOM | 2117 | O2  | LIG | 122 | -5.223  | -14.984 | -21.648 | 1.00 | 0.00 |
| ATOM | 2118 | H26 | LIG | 122 | -4.464  | -14.731 | -21.102 | 1.00 | 0.00 |

|      |      |     |     |     |         |         |         |      |      |
|------|------|-----|-----|-----|---------|---------|---------|------|------|
| ATOM | 2119 | O3  | LIG | 122 | -6.945  | -14.106 | -23.155 | 1.00 | 0.00 |
| ATOM | 2120 | O4  | LIG | 122 | -4.972  | -12.657 | -22.543 | 1.00 | 0.00 |
| ATOM | 2121 | C1  | LIG | 122 | -11.253 | -9.075  | -16.533 | 1.00 | 0.00 |
| ATOM | 2122 | H1  | LIG | 122 | -11.753 | -9.990  | -16.193 | 1.00 | 0.00 |
| ATOM | 2123 | H2  | LIG | 122 | -10.430 | -8.899  | -15.828 | 1.00 | 0.00 |
| ATOM | 2124 | C2  | LIG | 122 | -12.238 | -7.903  | -16.461 | 1.00 | 0.00 |
| ATOM | 2125 | H3  | LIG | 122 | -13.061 | -8.079  | -17.165 | 1.00 | 0.00 |
| ATOM | 2126 | H4  | LIG | 122 | -11.737 | -6.987  | -16.803 | 1.00 | 0.00 |
| ATOM | 2127 | C3  | LIG | 122 | -10.677 | -9.305  | -17.935 | 1.00 | 0.00 |
| ATOM | 2128 | H5  | LIG | 122 | -10.174 | -8.390  | -18.275 | 1.00 | 0.00 |
| ATOM | 2129 | H6  | LIG | 122 | -11.501 | -9.479  | -18.640 | 1.00 | 0.00 |
| ATOM | 2130 | C4  | LIG | 122 | -12.814 | -7.669  | -15.060 | 1.00 | 0.00 |
| ATOM | 2131 | H7  | LIG | 122 | -11.991 | -7.492  | -14.355 | 1.00 | 0.00 |
| ATOM | 2132 | H8  | LIG | 122 | -13.314 | -8.585  | -14.718 | 1.00 | 0.00 |
| ATOM | 2133 | C5  | LIG | 122 | -9.694  | -10.479 | -18.008 | 1.00 | 0.00 |
| ATOM | 2134 | H9  | LIG | 122 | -8.872  | -10.308 | -17.302 | 1.00 | 0.00 |
| ATOM | 2135 | H10 | LIG | 122 | -10.197 | -11.395 | -17.672 | 1.00 | 0.00 |
| ATOM | 2136 | C6  | LIG | 122 | -13.800 | -6.498  | -14.988 | 1.00 | 0.00 |
| ATOM | 2137 | H11 | LIG | 122 | -14.623 | -6.675  | -15.692 | 1.00 | 0.00 |
| ATOM | 2138 | H12 | LIG | 122 | -13.300 | -5.582  | -15.330 | 1.00 | 0.00 |
| ATOM | 2139 | C7  | LIG | 122 | -9.119  | -10.705 | -19.410 | 1.00 | 0.00 |
| ATOM | 2140 | H13 | LIG | 122 | -9.942  | -10.874 | -20.116 | 1.00 | 0.00 |

|      |      |     |     |     |         |         |         |      |      |
|------|------|-----|-----|-----|---------|---------|---------|------|------|
| ATOM | 2141 | H14 | LIG | 122 | -8.611  | -9.791  | -19.743 | 1.00 | 0.00 |
| ATOM | 2142 | C8  | LIG | 122 | -14.377 | -6.264  | -13.587 | 1.00 | 0.00 |
| ATOM | 2143 | H15 | LIG | 122 | -14.878 | -7.179  | -13.244 | 1.00 | 0.00 |
| ATOM | 2144 | H16 | LIG | 122 | -13.554 | -6.088  | -12.882 | 1.00 | 0.00 |
| ATOM | 2145 | C9  | LIG | 122 | -8.141  | -11.886 | -19.471 | 1.00 | 0.00 |
| ATOM | 2146 | H17 | LIG | 122 | -8.645  | -12.808 | -19.161 | 1.00 | 0.00 |
| ATOM | 2147 | H18 | LIG | 122 | -7.312  | -11.723 | -18.775 | 1.00 | 0.00 |
| ATOM | 2148 | C10 | LIG | 122 | -15.363 | -5.093  | -13.513 | 1.00 | 0.00 |
| ATOM | 2149 | H19 | LIG | 122 | -16.184 | -5.269  | -14.218 | 1.00 | 0.00 |
| ATOM | 2150 | H20 | LIG | 122 | -14.862 | -4.179  | -13.855 | 1.00 | 0.00 |
| ATOM | 2151 | C11 | LIG | 122 | -7.582  | -12.082 | -20.867 | 1.00 | 0.00 |
| ATOM | 2152 | H21 | LIG | 122 | -8.370  | -12.300 | -21.592 | 1.00 | 0.00 |
| ATOM | 2153 | H22 | LIG | 122 | -7.008  | -11.213 | -21.200 | 1.00 | 0.00 |
| ATOM | 2154 | C12 | LIG | 122 | -15.934 | -4.869  | -12.110 | 1.00 | 0.00 |
| ATOM | 2155 | H23 | LIG | 122 | -15.138 | -4.656  | -11.389 | 1.00 | 0.00 |
| ATOM | 2156 | H24 | LIG | 122 | -16.631 | -4.026  | -12.092 | 1.00 | 0.00 |
| ATOM | 2157 | H25 | LIG | 122 | -16.472 | -5.753  | -11.756 | 1.00 | 0.00 |
| TER  |      |     |     |     |         |         |         |      |      |
| ATOM | 2158 | S1  | LIG | 123 | 3.262   | -15.010 | -17.416 | 1.00 | 0.00 |
| ATOM | 2159 | O1  | LIG | 123 | 4.610   | -15.903 | -17.530 | 1.00 | 0.00 |
| ATOM | 2160 | O2  | LIG | 123 | 3.616   | -13.967 | -18.597 | 1.00 | 0.00 |
| ATOM | 2161 | H26 | LIG | 123 | 4.292   | -13.344 | -18.292 | 1.00 | 0.00 |

|      |      |     |     |     |        |         |         |      |      |
|------|------|-----|-----|-----|--------|---------|---------|------|------|
| ATOM | 2162 | O3  | LIG | 123 | 2.121  | -15.766 | -17.867 | 1.00 | 0.00 |
| ATOM | 2163 | O4  | LIG | 123 | 3.258  | -14.319 | -16.142 | 1.00 | 0.00 |
| ATOM | 2164 | C1  | LIG | 123 | 9.051  | -21.716 | -15.797 | 1.00 | 0.00 |
| ATOM | 2165 | H1  | LIG | 123 | 9.131  | -21.962 | -16.863 | 1.00 | 0.00 |
| ATOM | 2166 | H2  | LIG | 123 | 9.873  | -21.021 | -15.583 | 1.00 | 0.00 |
| ATOM | 2167 | C2  | LIG | 123 | 9.240  | -22.991 | -14.967 | 1.00 | 0.00 |
| ATOM | 2168 | H3  | LIG | 123 | 8.418  | -23.687 | -15.181 | 1.00 | 0.00 |
| ATOM | 2169 | H4  | LIG | 123 | 9.160  | -22.746 | -13.901 | 1.00 | 0.00 |
| ATOM | 2170 | C3  | LIG | 123 | 7.714  | -21.012 | -15.539 | 1.00 | 0.00 |
| ATOM | 2171 | H5  | LIG | 123 | 7.636  | -20.763 | -14.472 | 1.00 | 0.00 |
| ATOM | 2172 | H6  | LIG | 123 | 6.892  | -21.708 | -15.750 | 1.00 | 0.00 |
| ATOM | 2173 | C4  | LIG | 123 | 10.577 | -23.697 | -15.223 | 1.00 | 0.00 |
| ATOM | 2174 | H7  | LIG | 123 | 11.400 | -23.002 | -15.008 | 1.00 | 0.00 |
| ATOM | 2175 | H8  | LIG | 123 | 10.658 | -23.943 | -16.289 | 1.00 | 0.00 |
| ATOM | 2176 | C5  | LIG | 123 | 7.523  | -19.738 | -16.370 | 1.00 | 0.00 |
| ATOM | 2177 | H9  | LIG | 123 | 8.346  | -19.042 | -16.161 | 1.00 | 0.00 |
| ATOM | 2178 | H10 | LIG | 123 | 7.598  | -19.986 | -17.436 | 1.00 | 0.00 |
| ATOM | 2179 | C6  | LIG | 123 | 10.766 | -24.973 | -14.395 | 1.00 | 0.00 |
| ATOM | 2180 | H11 | LIG | 123 | 9.944  | -25.668 | -14.608 | 1.00 | 0.00 |
| ATOM | 2181 | H12 | LIG | 123 | 10.685 | -24.728 | -13.327 | 1.00 | 0.00 |
| ATOM | 2182 | C7  | LIG | 123 | 6.187  | -19.035 | -16.107 | 1.00 | 0.00 |
| ATOM | 2183 | H13 | LIG | 123 | 5.365  | -19.732 | -16.314 | 1.00 | 0.00 |

|      |      |     |     |     |         |         |         |      |      |
|------|------|-----|-----|-----|---------|---------|---------|------|------|
| ATOM | 2184 | H14 | LIG | 123 | 6.115   | -18.782 | -15.042 | 1.00 | 0.00 |
| ATOM | 2185 | C8  | LIG | 123 | 12.102  | -25.680 | -14.649 | 1.00 | 0.00 |
| ATOM | 2186 | H15 | LIG | 123 | 12.185  | -25.927 | -15.716 | 1.00 | 0.00 |
| ATOM | 2187 | H16 | LIG | 123 | 12.926  | -24.985 | -14.436 | 1.00 | 0.00 |
| ATOM | 2188 | C9  | LIG | 123 | 6.005   | -17.764 | -16.949 | 1.00 | 0.00 |
| ATOM | 2189 | H17 | LIG | 123 | 6.054   | -18.010 | -18.015 | 1.00 | 0.00 |
| ATOM | 2190 | H18 | LIG | 123 | 6.818   | -17.059 | -16.744 | 1.00 | 0.00 |
| ATOM | 2191 | C10 | LIG | 123 | 12.293  | -26.956 | -13.822 | 1.00 | 0.00 |
| ATOM | 2192 | H19 | LIG | 123 | 11.471  | -27.649 | -14.035 | 1.00 | 0.00 |
| ATOM | 2193 | H20 | LIG | 123 | 12.213  | -26.709 | -12.756 | 1.00 | 0.00 |
| ATOM | 2194 | C11 | LIG | 123 | 4.680   | -17.086 | -16.664 | 1.00 | 0.00 |
| ATOM | 2195 | H21 | LIG | 123 | 3.833   | -17.734 | -16.903 | 1.00 | 0.00 |
| ATOM | 2196 | H22 | LIG | 123 | 4.607   | -16.757 | -15.624 | 1.00 | 0.00 |
| ATOM | 2197 | C12 | LIG | 123 | 13.631  | -27.654 | -14.085 | 1.00 | 0.00 |
| ATOM | 2198 | H23 | LIG | 123 | 14.473  | -26.996 | -13.848 | 1.00 | 0.00 |
| ATOM | 2199 | H24 | LIG | 123 | 13.736  | -28.558 | -13.478 | 1.00 | 0.00 |
| ATOM | 2200 | H25 | LIG | 123 | 13.725  | -27.946 | -15.135 | 1.00 | 0.00 |
| TER  |      |     |     |     |         |         |         |      |      |
| ATOM | 2201 | S1  | LIG | 124 | -17.692 | 10.307  | -26.344 | 1.00 | 0.00 |
| ATOM | 2202 | O1  | LIG | 124 | -17.618 | 10.143  | -24.733 | 1.00 | 0.00 |
| ATOM | 2203 | O2  | LIG | 124 | -16.258 | 9.644   | -26.676 | 1.00 | 0.00 |
| ATOM | 2204 | H26 | LIG | 124 | -15.550 | 10.265  | -26.447 | 1.00 | 0.00 |

|      |      |     |     |     |         |        |         |      |      |
|------|------|-----|-----|-----|---------|--------|---------|------|------|
| ATOM | 2205 | O3  | LIG | 124 | -18.688 | 9.420  | -26.891 | 1.00 | 0.00 |
| ATOM | 2206 | O4  | LIG | 124 | -17.666 | 11.717 | -26.678 | 1.00 | 0.00 |
| ATOM | 2207 | C1  | LIG | 124 | -20.364 | 10.556 | -17.747 | 1.00 | 0.00 |
| ATOM | 2208 | H1  | LIG | 124 | -20.095 | 9.504  | -17.588 | 1.00 | 0.00 |
| ATOM | 2209 | H2  | LIG | 124 | -19.490 | 11.144 | -17.440 | 1.00 | 0.00 |
| ATOM | 2210 | C2  | LIG | 124 | -21.554 | 10.915 | -16.848 | 1.00 | 0.00 |
| ATOM | 2211 | H3  | LIG | 124 | -22.429 | 10.327 | -17.155 | 1.00 | 0.00 |
| ATOM | 2212 | H4  | LIG | 124 | -21.824 | 11.967 | -17.008 | 1.00 | 0.00 |
| ATOM | 2213 | C3  | LIG | 124 | -20.632 | 10.789 | -19.238 | 1.00 | 0.00 |
| ATOM | 2214 | H5  | LIG | 124 | -20.900 | 11.842 | -19.398 | 1.00 | 0.00 |
| ATOM | 2215 | H6  | LIG | 124 | -21.509 | 10.203 | -19.544 | 1.00 | 0.00 |
| ATOM | 2216 | C4  | LIG | 124 | -21.288 | 10.683 | -15.356 | 1.00 | 0.00 |
| ATOM | 2217 | H7  | LIG | 124 | -20.413 | 11.272 | -15.049 | 1.00 | 0.00 |
| ATOM | 2218 | H8  | LIG | 124 | -21.016 | 9.632  | -15.196 | 1.00 | 0.00 |
| ATOM | 2219 | C5  | LIG | 124 | -19.445 | 10.428 | -20.137 | 1.00 | 0.00 |
| ATOM | 2220 | H9  | LIG | 124 | -18.567 | 11.011 | -19.831 | 1.00 | 0.00 |
| ATOM | 2221 | H10 | LIG | 124 | -19.179 | 9.375  | -19.981 | 1.00 | 0.00 |
| ATOM | 2222 | C6  | LIG | 124 | -22.477 | 11.041 | -14.457 | 1.00 | 0.00 |
| ATOM | 2223 | H11 | LIG | 124 | -23.351 | 10.453 | -14.764 | 1.00 | 0.00 |
| ATOM | 2224 | H12 | LIG | 124 | -22.748 | 12.093 | -14.617 | 1.00 | 0.00 |
| ATOM | 2225 | C7  | LIG | 124 | -19.715 | 10.665 | -21.627 | 1.00 | 0.00 |
| ATOM | 2226 | H13 | LIG | 124 | -20.594 | 10.082 | -21.932 | 1.00 | 0.00 |

|      |      |     |     |     |         |        |         |      |      |
|------|------|-----|-----|-----|---------|--------|---------|------|------|
| ATOM | 2227 | H14 | LIG | 124 | -19.976 | 11.719 | -21.783 | 1.00 | 0.00 |
| ATOM | 2228 | C8  | LIG | 124 | -22.212 | 10.810 | -12.966 | 1.00 | 0.00 |
| ATOM | 2229 | H15 | LIG | 124 | -21.941 | 9.758  | -12.804 | 1.00 | 0.00 |
| ATOM | 2230 | H16 | LIG | 124 | -21.337 | 11.398 | -12.658 | 1.00 | 0.00 |
| ATOM | 2231 | C9  | LIG | 124 | -18.521 | 10.294 | -22.517 | 1.00 | 0.00 |
| ATOM | 2232 | H17 | LIG | 124 | -18.267 | 9.237  | -22.384 | 1.00 | 0.00 |
| ATOM | 2233 | H18 | LIG | 124 | -17.641 | 10.876 | -22.225 | 1.00 | 0.00 |
| ATOM | 2234 | C10 | LIG | 124 | -23.400 | 11.167 | -12.065 | 1.00 | 0.00 |
| ATOM | 2235 | H19 | LIG | 124 | -24.274 | 10.580 | -12.373 | 1.00 | 0.00 |
| ATOM | 2236 | H20 | LIG | 124 | -23.670 | 12.219 | -12.226 | 1.00 | 0.00 |
| ATOM | 2237 | C11 | LIG | 124 | -18.813 | 10.545 | -23.984 | 1.00 | 0.00 |
| ATOM | 2238 | H21 | LIG | 124 | -19.655 | 9.946  | -24.337 | 1.00 | 0.00 |
| ATOM | 2239 | H22 | LIG | 124 | -19.007 | 11.602 | -24.184 | 1.00 | 0.00 |
| ATOM | 2240 | C12 | LIG | 124 | -23.125 | 10.932 | -10.577 | 1.00 | 0.00 |
| ATOM | 2241 | H23 | LIG | 124 | -22.277 | 11.532 | -10.233 | 1.00 | 0.00 |
| ATOM | 2242 | H24 | LIG | 124 | -23.991 | 11.198 | -9.964  | 1.00 | 0.00 |
| ATOM | 2243 | H25 | LIG | 124 | -22.888 | 9.882  | -10.380 | 1.00 | 0.00 |
| TER  |      |     |     |     |         |        |         |      |      |
| EMD  |      |     |     |     |         |        |         |      |      |

**Table H:** The number of atoms present in the system of BE-Sum

|      |   |   |     |   |       |        |        |      |      |
|------|---|---|-----|---|-------|--------|--------|------|------|
| ATOM | 1 | N | GLU | 1 | 9.101 | 17.697 | -4.770 | 1.00 | 0.00 |
|------|---|---|-----|---|-------|--------|--------|------|------|

|      |    |     |     |   |       |        |        |      |      |
|------|----|-----|-----|---|-------|--------|--------|------|------|
| ATOM | 2  | H1  | GLU | 1 | 9.411 | 18.312 | -5.508 | 1.00 | 0.00 |
| ATOM | 3  | H2  | GLU | 1 | 9.508 | 16.784 | -4.916 | 1.00 | 0.00 |
| ATOM | 4  | H3  | GLU | 1 | 9.221 | 18.167 | -3.884 | 1.00 | 0.00 |
| ATOM | 5  | CA  | GLU | 1 | 7.631 | 17.501 | -4.916 | 1.00 | 0.00 |
| ATOM | 6  | HA  | GLU | 1 | 7.402 | 16.444 | -5.056 | 1.00 | 0.00 |
| ATOM | 7  | CB  | GLU | 1 | 6.924 | 17.991 | -3.649 | 1.00 | 0.00 |
| ATOM | 8  | HB2 | GLU | 1 | 7.345 | 17.485 | -2.780 | 1.00 | 0.00 |
| ATOM | 9  | HB3 | GLU | 1 | 7.067 | 19.066 | -3.547 | 1.00 | 0.00 |
| ATOM | 10 | CG  | GLU | 1 | 5.426 | 17.682 | -3.744 | 1.00 | 0.00 |
| ATOM | 11 | HG2 | GLU | 1 | 5.029 | 18.126 | -4.656 | 1.00 | 0.00 |
| ATOM | 12 | HG3 | GLU | 1 | 5.282 | 16.602 | -3.773 | 1.00 | 0.00 |
| ATOM | 13 | CD  | GLU | 1 | 4.694 | 18.260 | -2.537 | 1.00 | 0.00 |
| ATOM | 14 | OE1 | GLU | 1 | 4.823 | 17.694 | -1.463 | 1.00 | 0.00 |
| ATOM | 15 | OE2 | GLU | 1 | 4.012 | 19.258 | -2.704 | 1.00 | 0.00 |
| ATOM | 16 | C   | GLU | 1 | 7.135 | 18.282 | -6.131 | 1.00 | 0.00 |
| ATOM | 17 | O   | GLU | 1 | 6.990 | 19.504 | -6.078 | 1.00 | 0.00 |
| ATOM | 18 | N   | ALA | 2 | 6.875 | 17.565 | -7.222 | 1.00 | 0.00 |
| ATOM | 19 | H   | ALA | 2 | 7.027 | 16.566 | -7.224 | 1.00 | 0.00 |
| ATOM | 20 | CA  | ALA | 2 | 6.391 | 18.195 | -8.447 | 1.00 | 0.00 |
| ATOM | 21 | HA  | ALA | 2 | 7.047 | 19.018 | -8.730 | 1.00 | 0.00 |
| ATOM | 22 | CB  | ALA | 2 | 6.367 | 17.175 | -9.587 | 1.00 | 0.00 |
| ATOM | 23 | HB1 | ALA | 2 | 5.707 | 16.349 | -9.322 | 1.00 | 0.00 |



|      |    |         |   |       |        |         |      |      |
|------|----|---------|---|-------|--------|---------|------|------|
| ATOM | 24 | HB2 ALA | 2 | 6.003 | 17.653 | -10.496 | 1.00 | 0.00 |
| ATOM | 25 | HB3 ALA | 2 | 7.375 | 16.794 | -9.756  | 1.00 | 0.00 |
| ATOM | 26 | C ALA   | 2 | 4.990 | 18.763 | -8.242  | 1.00 | 0.00 |
| ATOM | 27 | O ALA   | 2 | 4.197 | 18.220 | -7.474  | 1.00 | 0.00 |
| ATOM | 28 | N GLU   | 3 | 4.695 | 19.859 | -8.934  | 1.00 | 0.00 |
| ATOM | 29 | H GLU   | 3 | 5.388 | 20.286 | -9.531  | 1.00 | 0.00 |
| ATOM | 30 | CA GLU  | 3 | 3.386 | 20.497 | -8.826  | 1.00 | 0.00 |
| ATOM | 31 | HA GLU  | 3 | 3.175 | 20.740 | -7.784  | 1.00 | 0.00 |
| ATOM | 32 | CB GLU  | 3 | 3.361 | 21.795 | -9.648  | 1.00 | 0.00 |
| ATOM | 33 | HB2 GLU | 3 | 2.466 | 22.361 | -9.390  | 1.00 | 0.00 |
| ATOM | 34 | HB3 GLU | 3 | 4.246 | 22.385 | -9.407  | 1.00 | 0.00 |
| ATOM | 35 | CG GLU  | 3 | 3.351 | 21.478 | -11.151 | 1.00 | 0.00 |
| ATOM | 36 | HG2 GLU | 3 | 2.470 | 20.880 | -11.383 | 1.00 | 0.00 |
| ATOM | 37 | HG3 GLU | 3 | 3.312 | 22.413 | -11.709 | 1.00 | 0.00 |
| ATOM | 38 | CD GLU  | 3 | 4.609 | 20.703 | -11.543 | 1.00 | 0.00 |
| ATOM | 39 | OE1 GLU | 3 | 5.694 | 21.208 | -11.305 | 1.00 | 0.00 |
| ATOM | 40 | OE2 GLU | 3 | 4.468 | 19.613 | -12.075 | 1.00 | 0.00 |
| ATOM | 41 | C GLU   | 3 | 2.283 | 19.556 | -9.309  | 1.00 | 0.00 |
| ATOM | 42 | O GLU   | 3 | 1.125 | 19.687 | -8.910  | 1.00 | 0.00 |
| ATOM | 43 | N ALA   | 4 | 2.653 | 18.612 | -10.172 | 1.00 | 0.00 |
| ATOM | 44 | H ALA   | 4 | 3.609 | 18.564 | -10.495 | 1.00 | 0.00 |
| ATOM | 45 | CA ALA  | 4 | 1.691 | 17.653 | -10.710 | 1.00 | 0.00 |

|      |    |      |     |   |       |        |         |      |      |
|------|----|------|-----|---|-------|--------|---------|------|------|
| ATOM | 46 | HA   | ALA | 4 | 0.794 | 18.182 | -11.030 | 1.00 | 0.00 |
| ATOM | 47 | CB   | ALA | 4 | 2.288 | 16.928 | -11.918 | 1.00 | 0.00 |
| ATOM | 48 | HB1  | ALA | 4 | 3.183 | 16.386 | -11.611 | 1.00 | 0.00 |
| ATOM | 49 | HB2  | ALA | 4 | 1.557 | 16.225 | -12.318 | 1.00 | 0.00 |
| ATOM | 50 | HB3  | ALA | 4 | 2.550 | 17.655 | -12.686 | 1.00 | 0.00 |
| ATOM | 51 | C    | ALA | 4 | 1.277 | 16.643 | -9.651  | 1.00 | 0.00 |
| ATOM | 52 | O    | ALA | 4 | 0.425 | 15.787 | -9.894  | 1.00 | 0.00 |
| ATOM | 53 | N    | GLN | 5 | 1.876 | 16.758 | -8.475  | 1.00 | 0.00 |
| ATOM | 54 | H    | GLN | 5 | 2.570 | 17.477 | -8.328  | 1.00 | 0.00 |
| ATOM | 55 | CA   | GLN | 5 | 1.562 | 15.866 | -7.369  | 1.00 | 0.00 |
| ATOM | 56 | HA   | GLN | 5 | 1.929 | 14.859 | -7.572  | 1.00 | 0.00 |
| ATOM | 57 | CB   | GLN | 5 | 2.241 | 16.387 | -6.107  | 1.00 | 0.00 |
| ATOM | 58 | HB2  | GLN | 5 | 3.317 | 16.441 | -6.274  | 1.00 | 0.00 |
| ATOM | 59 | HB3  | GLN | 5 | 1.859 | 17.382 | -5.878  | 1.00 | 0.00 |
| ATOM | 60 | CG   | GLN | 5 | 1.954 | 15.447 | -4.931  | 1.00 | 0.00 |
| ATOM | 61 | HG2  | GLN | 5 | 0.882 | 15.271 | -4.846  | 1.00 | 0.00 |
| ATOM | 62 | HG3  | GLN | 5 | 2.467 | 14.497 | -5.084  | 1.00 | 0.00 |
| ATOM | 63 | CD   | GLN | 5 | 2.451 | 16.065 | -3.628  | 1.00 | 0.00 |
| ATOM | 64 | OE1  | GLN | 5 | 2.063 | 17.181 | -3.281  | 1.00 | 0.00 |
| ATOM | 65 | NE2  | GLN | 5 | 3.289 | 15.402 | -2.880  | 1.00 | 0.00 |
| ATOM | 66 | HE21 | GLN | 5 | 3.621 | 15.807 | -2.016  | 1.00 | 0.00 |
| ATOM | 67 | HE22 | GLN | 5 | 3.603 | 14.486 | -3.168  | 1.00 | 0.00 |

|      |    |     |     |   |        |        |         |      |      |
|------|----|-----|-----|---|--------|--------|---------|------|------|
| ATOM | 68 | C   | GLN | 5 | 0.053  | 15.807 | -7.144  | 1.00 | 0.00 |
| ATOM | 69 | O   | GLN | 5 | -0.497 | 14.754 | -6.822  | 1.00 | 0.00 |
| ATOM | 70 | N   | GLU | 6 | -0.606 | 16.952 | -7.311  | 1.00 | 0.00 |
| ATOM | 71 | H   | GLU | 6 | -0.104 | 17.796 | -7.546  | 1.00 | 0.00 |
| ATOM | 72 | CA  | GLU | 6 | -2.050 | 17.035 | -7.121  | 1.00 | 0.00 |
| ATOM | 73 | HA  | GLU | 6 | -2.304 | 16.843 | -6.078  | 1.00 | 0.00 |
| ATOM | 74 | CB  | GLU | 6 | -2.540 | 18.439 | -7.495  | 1.00 | 0.00 |
| ATOM | 75 | HB2 | GLU | 6 | -3.606 | 18.515 | -7.284  | 1.00 | 0.00 |
| ATOM | 76 | HB3 | GLU | 6 | -1.999 | 19.178 | -6.903  | 1.00 | 0.00 |
| ATOM | 77 | CG  | GLU | 6 | -2.294 | 18.699 | -8.986  | 1.00 | 0.00 |
| ATOM | 78 | HG2 | GLU | 6 | -1.260 | 18.451 | -9.227  | 1.00 | 0.00 |
| ATOM | 79 | HG3 | GLU | 6 | -2.964 | 18.073 | -9.575  | 1.00 | 0.00 |
| ATOM | 80 | CD  | GLU | 6 | -2.554 | 20.168 | -9.309  | 1.00 | 0.00 |
| ATOM | 81 | OE1 | GLU | 6 | -3.713 | 20.546 | -9.365  | 1.00 | 0.00 |
| ATOM | 82 | OE2 | GLU | 6 | -1.590 | 20.892 | -9.496  | 1.00 | 0.00 |
| ATOM | 83 | C   | GLU | 6 | -2.778 | 15.985 | -7.960  | 1.00 | 0.00 |
| ATOM | 84 | O   | GLU | 6 | -3.694 | 15.323 | -7.473  | 1.00 | 0.00 |
| ATOM | 85 | N   | GLU | 7 | -2.356 | 15.824 | -9.215  | 1.00 | 0.00 |
| ATOM | 86 | H   | GLU | 7 | -1.608 | 16.395 | -9.583  | 1.00 | 0.00 |
| ATOM | 87 | CA  | GLU | 7 | -2.968 | 14.836 | -10.095 | 1.00 | 0.00 |
| ATOM | 88 | HA  | GLU | 7 | -4.018 | 15.081 | -10.253 | 1.00 | 0.00 |
| ATOM | 89 | CB  | GLU | 7 | -2.258 | 14.820 | -11.455 | 1.00 | 0.00 |

|      |     |     |     |   |        |        |         |      |      |
|------|-----|-----|-----|---|--------|--------|---------|------|------|
| ATOM | 90  | HB2 | GLU | 7 | -2.455 | 15.756 | -11.976 | 1.00 | 0.00 |
| ATOM | 91  | HB3 | GLU | 7 | -1.184 | 14.709 | -11.301 | 1.00 | 0.00 |
| ATOM | 92  | CG  | GLU | 7 | -2.777 | 13.646 | -12.298 | 1.00 | 0.00 |
| ATOM | 93  | HG2 | GLU | 7 | -3.793 | 13.406 | -11.983 | 1.00 | 0.00 |
| ATOM | 94  | HG3 | GLU | 7 | -2.780 | 13.931 | -13.350 | 1.00 | 0.00 |
| ATOM | 95  | CD  | GLU | 7 | -1.883 | 12.423 | -12.105 | 1.00 | 0.00 |
| ATOM | 96  | OE1 | GLU | 7 | -0.713 | 12.508 | -12.441 | 1.00 | 0.00 |
| ATOM | 97  | OE2 | GLU | 7 | -2.382 | 11.417 | -11.628 | 1.00 | 0.00 |
| ATOM | 98  | C   | GLU | 7 | -2.878 | 13.461 | -9.459  | 1.00 | 0.00 |
| ATOM | 99  | O   | GLU | 7 | -3.818 | 12.668 | -9.520  | 1.00 | 0.00 |
| ATOM | 100 | N   | CYX | 8 | -1.725 | 13.188 | -8.857  | 1.00 | 0.00 |
| ATOM | 101 | H   | CYX | 8 | -0.975 | 13.865 | -8.849  | 1.00 | 0.00 |
| ATOM | 102 | CA  | CYX | 8 | -1.499 | 11.907 | -8.221  | 1.00 | 0.00 |
| ATOM | 103 | HA  | CYX | 8 | -1.756 | 11.099 | -8.906  | 1.00 | 0.00 |
| ATOM | 104 | CB  | CYX | 8 | -0.024 | 11.768 | -7.832  | 1.00 | 0.00 |
| ATOM | 105 | HB2 | CYX | 8 | 0.227  | 12.518 | -7.082  | 1.00 | 0.00 |
| ATOM | 106 | HB3 | CYX | 8 | 0.153  | 10.773 | -7.423  | 1.00 | 0.00 |
| ATOM | 107 | SG  | CYX | 8 | 1.013  | 12.007 | -9.295  | 1.00 | 0.00 |
| ATOM | 108 | C   | CYX | 8 | -2.369 | 11.758 | -6.980  | 1.00 | 0.00 |
| ATOM | 109 | O   | CYX | 8 | -3.156 | 10.818 | -6.878  | 1.00 | 0.00 |
| ATOM | 110 | N   | ARG | 9 | -2.220 | 12.692 | -6.044  | 1.00 | 0.00 |
| ATOM | 111 | H   | ARG | 9 | -1.545 | 13.433 | -6.168  | 1.00 | 0.00 |

|      |     |      |     |   |        |        |        |      |      |
|------|-----|------|-----|---|--------|--------|--------|------|------|
| ATOM | 112 | CA   | ARG | 9 | -2.993 | 12.659 | -4.806 | 1.00 | 0.00 |
| ATOM | 113 | HA   | ARG | 9 | -2.727 | 11.778 | -4.221 | 1.00 | 0.00 |
| ATOM | 114 | CB   | ARG | 9 | -2.692 | 13.908 | -3.974 | 1.00 | 0.00 |
| ATOM | 115 | HB2  | ARG | 9 | -1.616 | 13.988 | -3.818 | 1.00 | 0.00 |
| ATOM | 116 | HB3  | ARG | 9 | -3.048 | 14.790 | -4.504 | 1.00 | 0.00 |
| ATOM | 117 | CG   | ARG | 9 | -3.398 | 13.808 | -2.617 | 1.00 | 0.00 |
| ATOM | 118 | HG2  | ARG | 9 | -4.477 | 13.781 | -2.770 | 1.00 | 0.00 |
| ATOM | 119 | HG3  | ARG | 9 | -3.081 | 12.897 | -2.109 | 1.00 | 0.00 |
| ATOM | 120 | CD   | ARG | 9 | -3.035 | 15.022 | -1.760 | 1.00 | 0.00 |
| ATOM | 121 | HD2  | ARG | 9 | -3.415 | 14.888 | -0.747 | 1.00 | 0.00 |
| ATOM | 122 | HD3  | ARG | 9 | -1.952 | 15.143 | -1.728 | 1.00 | 0.00 |
| ATOM | 123 | NE   | ARG | 9 | -3.625 | 16.233 | -2.325 | 1.00 | 0.00 |
| ATOM | 124 | HE   | ARG | 9 | -4.299 | 16.166 | -3.074 | 1.00 | 0.00 |
| ATOM | 125 | CZ   | ARG | 9 | -3.292 | 17.442 | -1.875 | 1.00 | 0.00 |
| ATOM | 126 | NH1  | ARG | 9 | -2.426 | 17.567 | -0.906 | 1.00 | 0.00 |
| ATOM | 127 | HH11 | ARG | 9 | -2.008 | 16.743 | -0.497 | 1.00 | 0.00 |
| ATOM | 128 | HH12 | ARG | 9 | -2.178 | 18.486 | -0.570 | 1.00 | 0.00 |
| ATOM | 129 | NH2  | ARG | 9 | -3.835 | 18.504 | -2.402 | 1.00 | 0.00 |
| ATOM | 130 | HH21 | ARG | 9 | -4.506 | 18.405 | -3.150 | 1.00 | 0.00 |
| ATOM | 131 | HH22 | ARG | 9 | -3.581 | 19.419 | -2.059 | 1.00 | 0.00 |
| ATOM | 132 | C    | ARG | 9 | -4.488 | 12.582 | -5.098 | 1.00 | 0.00 |
| ATOM | 133 | O    | ARG | 9 | -5.211 | 11.814 | -4.466 | 1.00 | 0.00 |

|      |     |     |     |    |        |        |         |      |      |
|------|-----|-----|-----|----|--------|--------|---------|------|------|
| ATOM | 134 | N   | GLU | 10 | -4.946 | 13.380 | -6.059  | 1.00 | 0.00 |
| ATOM | 135 | H   | GLU | 10 | -4.323 | 14.010 | -6.544  | 1.00 | 0.00 |
| ATOM | 136 | CA  | GLU | 10 | -6.359 | 13.386 | -6.424  | 1.00 | 0.00 |
| ATOM | 137 | HA  | GLU | 10 | -6.968 | 13.659 | -5.562  | 1.00 | 0.00 |
| ATOM | 138 | CB  | GLU | 10 | -6.602 | 14.408 | -7.539  | 1.00 | 0.00 |
| ATOM | 139 | HB2 | GLU | 10 | -6.342 | 15.403 | -7.179  | 1.00 | 0.00 |
| ATOM | 140 | HB3 | GLU | 10 | -5.979 | 14.159 | -8.398  | 1.00 | 0.00 |
| ATOM | 141 | CG  | GLU | 10 | -8.079 | 14.383 | -7.953  | 1.00 | 0.00 |
| ATOM | 142 | HG2 | GLU | 10 | -8.686 | 14.089 | -7.097  | 1.00 | 0.00 |
| ATOM | 143 | HG3 | GLU | 10 | -8.373 | 15.379 | -8.282  | 1.00 | 0.00 |
| ATOM | 144 | CD  | GLU | 10 | -8.290 | 13.387 | -9.093  | 1.00 | 0.00 |
| ATOM | 145 | OE1 | GLU | 10 | -7.640 | 13.535 | -10.115 | 1.00 | 0.00 |
| ATOM | 146 | OE2 | GLU | 10 | -9.099 | 12.488 | -8.926  | 1.00 | 0.00 |
| ATOM | 147 | C   | GLU | 10 | -6.796 | 12.002 | -6.894  | 1.00 | 0.00 |
| ATOM | 148 | O   | GLU | 10 | -7.821 | 11.478 | -6.454  | 1.00 | 0.00 |
| ATOM | 149 | N   | GLN | 11 | -6.009 | 11.423 | -7.797  | 1.00 | 0.00 |
| ATOM | 150 | H   | GLN | 11 | -5.198 | 11.912 | -8.147  | 1.00 | 0.00 |
| ATOM | 151 | CA  | GLN | 11 | -6.309 | 10.103 | -8.341  | 1.00 | 0.00 |
| ATOM | 152 | HA  | GLN | 11 | -7.287 | 10.108 | -8.822  | 1.00 | 0.00 |
| ATOM | 153 | CB  | GLN | 11 | -5.252 | 9.719  | -9.383  | 1.00 | 0.00 |
| ATOM | 154 | HB2 | GLN | 11 | -5.110 | 10.546 | -10.078 | 1.00 | 0.00 |
| ATOM | 155 | HB3 | GLN | 11 | -4.309 | 9.501  | -8.880  | 1.00 | 0.00 |

|      |     |      |     |    |        |       |         |      |      |
|------|-----|------|-----|----|--------|-------|---------|------|------|
| ATOM | 156 | CG   | GLN | 11 | -5.718 | 8.479 | -10.154 | 1.00 | 0.00 |
| ATOM | 157 | HG2  | GLN | 11 | -5.794 | 7.628 | -9.476  | 1.00 | 0.00 |
| ATOM | 158 | HG3  | GLN | 11 | -6.690 | 8.669 | -10.608 | 1.00 | 0.00 |
| ATOM | 159 | CD   | GLN | 11 | -4.721 | 8.134 | -11.260 | 1.00 | 0.00 |
| ATOM | 160 | OE1  | GLN | 11 | -3.787 | 8.894 | -11.522 | 1.00 | 0.00 |
| ATOM | 161 | NE2  | GLN | 11 | -4.866 | 7.023 | -11.929 | 1.00 | 0.00 |
| ATOM | 162 | HE21 | GLN | 11 | -4.211 | 6.788 | -12.661 | 1.00 | 0.00 |
| ATOM | 163 | HE22 | GLN | 11 | -5.632 | 6.402 | -11.711 | 1.00 | 0.00 |
| ATOM | 164 | C    | GLN | 11 | -6.368 | 9.043 | -7.240  | 1.00 | 0.00 |
| ATOM | 165 | O    | GLN | 11 | -7.143 | 8.091 | -7.332  | 1.00 | 0.00 |
| ATOM | 166 | N    | MET | 12 | -5.537 | 9.201 | -6.208  | 1.00 | 0.00 |
| ATOM | 167 | H    | MET | 12 | -4.893 | 9.979 | -6.182  | 1.00 | 0.00 |
| ATOM | 168 | CA   | MET | 12 | -5.501 | 8.233 | -5.109  | 1.00 | 0.00 |
| ATOM | 169 | HA   | MET | 12 | -5.119 | 7.277 | -5.469  | 1.00 | 0.00 |
| ATOM | 170 | CB   | MET | 12 | -4.587 | 8.733 | -3.988  | 1.00 | 0.00 |
| ATOM | 171 | HB2  | MET | 12 | -4.874 | 9.746 | -3.707  | 1.00 | 0.00 |
| ATOM | 172 | HB3  | MET | 12 | -4.678 | 8.077 | -3.122  | 1.00 | 0.00 |
| ATOM | 173 | CG   | MET | 12 | -3.139 | 8.731 | -4.478  | 1.00 | 0.00 |
| ATOM | 174 | HG2  | MET | 12 | -2.854 | 7.721 | -4.774  | 1.00 | 0.00 |
| ATOM | 175 | HG3  | MET | 12 | -3.040 | 9.401 | -5.332  | 1.00 | 0.00 |
| ATOM | 176 | SD   | MET | 12 | -2.046 | 9.292 | -3.153  | 1.00 | 0.00 |
| ATOM | 177 | CE   | MET | 12 | -0.598 | 9.617 | -4.187  | 1.00 | 0.00 |

|      |     |      |     |    |         |        |        |      |      |
|------|-----|------|-----|----|---------|--------|--------|------|------|
| ATOM | 178 | HE1  | MET | 12 | -0.847  | 10.369 | -4.935 | 1.00 | 0.00 |
| ATOM | 179 | HE2  | MET | 12 | 0.220   | 9.981  | -3.564 | 1.00 | 0.00 |
| ATOM | 180 | HE3  | MET | 12 | -0.292  | 8.696  | -4.685 | 1.00 | 0.00 |
| ATOM | 181 | C    | MET | 12 | -6.898  | 7.970  | -4.552 | 1.00 | 0.00 |
| ATOM | 182 | O    | MET | 12 | -7.239  | 6.826  | -4.253 | 1.00 | 0.00 |
| ATOM | 183 | N    | GLN | 13 | -7.708  | 9.021  | -4.421 | 1.00 | 0.00 |
| ATOM | 184 | H    | GLN | 13 | -7.400  | 9.953  | -4.657 | 1.00 | 0.00 |
| ATOM | 185 | CA   | GLN | 13 | -9.065  | 8.848  | -3.908 | 1.00 | 0.00 |
| ATOM | 186 | HA   | GLN | 13 | -9.025  | 8.442  | -2.897 | 1.00 | 0.00 |
| ATOM | 187 | CB   | GLN | 13 | -9.807  | 10.188 | -3.869 | 1.00 | 0.00 |
| ATOM | 188 | HB2  | GLN | 13 | -9.639  | 10.718 | -4.806 | 1.00 | 0.00 |
| ATOM | 189 | HB3  | GLN | 13 | -10.874 | 10.004 | -3.742 | 1.00 | 0.00 |
| ATOM | 190 | CG   | GLN | 13 | -9.294  | 11.038 | -2.702 | 1.00 | 0.00 |
| ATOM | 191 | HG2  | GLN | 13 | -9.924  | 11.919 | -2.586 | 1.00 | 0.00 |
| ATOM | 192 | HG3  | GLN | 13 | -9.312  | 10.455 | -1.781 | 1.00 | 0.00 |
| ATOM | 193 | CD   | GLN | 13 | -7.862  | 11.494 | -2.962 | 1.00 | 0.00 |
| ATOM | 194 | OE1  | GLN | 13 | -6.912  | 10.820 | -2.564 | 1.00 | 0.00 |
| ATOM | 195 | NE2  | GLN | 13 | -7.650  | 12.608 | -3.607 | 1.00 | 0.00 |
| ATOM | 196 | HE21 | GLN | 13 | -6.703  | 12.914 | -3.782 | 1.00 | 0.00 |
| ATOM | 197 | HE22 | GLN | 13 | -8.433  | 13.158 | -3.928 | 1.00 | 0.00 |
| ATOM | 198 | C    | GLN | 13 | -9.825  | 7.873  | -4.794 | 1.00 | 0.00 |
| ATOM | 199 | O    | GLN | 13 | -10.495 | 6.967  | -4.303 | 1.00 | 0.00 |



|      |     |      |     |    |         |        |         |      |      |
|------|-----|------|-----|----|---------|--------|---------|------|------|
| ATOM | 200 | N    | ARG | 14 | -9.679  | 8.048  | -6.105  | 1.00 | 0.00 |
| ATOM | 201 | H    | ARG | 14 | -9.122  | 8.816  | -6.452  | 1.00 | 0.00 |
| ATOM | 202 | CA   | ARG | 14 | -10.310 | 7.168  | -7.066  | 1.00 | 0.00 |
| ATOM | 203 | HA   | ARG | 14 | -11.393 | 7.204  | -6.947  | 1.00 | 0.00 |
| ATOM | 204 | CB   | ARG | 14 | -9.959  | 7.601  | -8.494  | 1.00 | 0.00 |
| ATOM | 205 | HB2  | ARG | 14 | -10.132 | 8.672  | -8.597  | 1.00 | 0.00 |
| ATOM | 206 | HB3  | ARG | 14 | -8.908  | 7.383  | -8.687  | 1.00 | 0.00 |
| ATOM | 207 | CG   | ARG | 14 | -10.831 | 6.843  | -9.501  | 1.00 | 0.00 |
| ATOM | 208 | HG2  | ARG | 14 | -10.358 | 6.871  | -10.483 | 1.00 | 0.00 |
| ATOM | 209 | HG3  | ARG | 14 | -10.938 | 5.807  | -9.179  | 1.00 | 0.00 |
| ATOM | 210 | CD   | ARG | 14 | -12.212 | 7.497  | -9.581  | 1.00 | 0.00 |
| ATOM | 211 | HD2  | ARG | 14 | -12.868 | 6.901  | -10.216 | 1.00 | 0.00 |
| ATOM | 212 | HD3  | ARG | 14 | -12.644 | 7.573  | -8.583  | 1.00 | 0.00 |
| ATOM | 213 | NE   | ARG | 14 | -12.103 | 8.839  | -10.148 | 1.00 | 0.00 |
| ATOM | 214 | HE   | ARG | 14 | -11.308 | 9.082  | -10.721 | 1.00 | 0.00 |
| ATOM | 215 | CZ   | ARG | 14 | -13.035 | 9.765  | -9.928  | 1.00 | 0.00 |
| ATOM | 216 | NH1  | ARG | 14 | -14.080 | 9.487  | -9.196  | 1.00 | 0.00 |
| ATOM | 217 | HH11 | ARG | 14 | -14.181 | 8.565  | -8.795  | 1.00 | 0.00 |
| ATOM | 218 | HH12 | ARG | 14 | -14.782 | 10.194 | -9.034  | 1.00 | 0.00 |
| ATOM | 219 | NH2  | ARG | 14 | -12.903 | 10.956 | -10.446 | 1.00 | 0.00 |
| ATOM | 220 | HH21 | ARG | 14 | -12.094 | 11.170 | -11.011 | 1.00 | 0.00 |
| ATOM | 221 | HH22 | ARG | 14 | -13.610 | 11.657 | -10.278 | 1.00 | 0.00 |

|      |     |      |     |    |         |       |         |      |      |
|------|-----|------|-----|----|---------|-------|---------|------|------|
| ATOM | 222 | C    | ARG | 14 | -9.815  | 5.762 | -6.810  | 1.00 | 0.00 |
| ATOM | 223 | O    | ARG | 14 | -10.585 | 4.801 | -6.817  | 1.00 | 0.00 |
| ATOM | 224 | N    | GLN | 15 | -8.509  | 5.664 | -6.560  | 1.00 | 0.00 |
| ATOM | 225 | H    | GLN | 15 | -7.915  | 6.480 | -6.585  | 1.00 | 0.00 |
| ATOM | 226 | CA   | GLN | 15 | -7.904  | 4.388 | -6.273  | 1.00 | 0.00 |
| ATOM | 227 | HA   | GLN | 15 | -8.287  | 3.631 | -6.957  | 1.00 | 0.00 |
| ATOM | 228 | CB   | GLN | 15 | -6.381  | 4.475 | -6.442  | 1.00 | 0.00 |
| ATOM | 229 | HB2  | GLN | 15 | -6.071  | 5.519 | -6.395  | 1.00 | 0.00 |
| ATOM | 230 | HB3  | GLN | 15 | -5.896  | 3.916 | -5.641  | 1.00 | 0.00 |
| ATOM | 231 | CG   | GLN | 15 | -5.976  | 3.883 | -7.796  | 1.00 | 0.00 |
| ATOM | 232 | HG2  | GLN | 15 | -4.941  | 3.542 | -7.755  | 1.00 | 0.00 |
| ATOM | 233 | HG3  | GLN | 15 | -6.624  | 3.044 | -8.050  | 1.00 | 0.00 |
| ATOM | 234 | CD   | GLN | 15 | -6.098  | 4.941 | -8.888  | 1.00 | 0.00 |
| ATOM | 235 | OE1  | GLN | 15 | -5.091  | 5.467 | -9.359  | 1.00 | 0.00 |
| ATOM | 236 | NE2  | GLN | 15 | -7.281  | 5.290 | -9.317  | 1.00 | 0.00 |
| ATOM | 237 | HE21 | GLN | 15 | -7.366  | 5.990 | -10.040 | 1.00 | 0.00 |
| ATOM | 238 | HE22 | GLN | 15 | -8.105  | 4.858 | -8.924  | 1.00 | 0.00 |
| ATOM | 239 | C    | GLN | 15 | -8.256  | 3.982 | -4.851  | 1.00 | 0.00 |
| ATOM | 240 | O    | GLN | 15 | -7.434  | 4.066 | -3.937  | 1.00 | 0.00 |
| ATOM | 241 | N    | GLN | 16 | -9.487  | 3.536 | -4.686  | 1.00 | 0.00 |
| ATOM | 242 | H    | GLN | 16 | -10.125 | 3.514 | -5.468  | 1.00 | 0.00 |
| ATOM | 243 | CA   | GLN | 16 | -9.976  | 3.100 | -3.384  | 1.00 | 0.00 |

|      |     |      |     |    |         |        |        |      |      |
|------|-----|------|-----|----|---------|--------|--------|------|------|
| ATOM | 244 | HA   | GLN | 16 | -9.565  | 3.732  | -2.596 | 1.00 | 0.00 |
| ATOM | 245 | CB   | GLN | 16 | -11.501 | 3.202  | -3.346 | 1.00 | 0.00 |
| ATOM | 246 | HB2  | GLN | 16 | -11.933 | 2.582  | -4.132 | 1.00 | 0.00 |
| ATOM | 247 | HB3  | GLN | 16 | -11.870 | 2.867  | -2.376 | 1.00 | 0.00 |
| ATOM | 248 | CG   | GLN | 16 | -11.903 | 4.661  | -3.568 | 1.00 | 0.00 |
| ATOM | 249 | HG2  | GLN | 16 | -11.473 | 5.279  | -2.779 | 1.00 | 0.00 |
| ATOM | 250 | HG3  | GLN | 16 | -11.534 | 4.999  | -4.536 | 1.00 | 0.00 |
| ATOM | 251 | CD   | GLN | 16 | -13.420 | 4.822  | -3.541 | 1.00 | 0.00 |
| ATOM | 252 | OE1  | GLN | 16 | -14.156 | 3.834  | -3.525 | 1.00 | 0.00 |
| ATOM | 253 | NE2  | GLN | 16 | -13.930 | 6.023  | -3.538 | 1.00 | 0.00 |
| ATOM | 254 | HE21 | GLN | 16 | -14.932 | 6.142  | -3.520 | 1.00 | 0.00 |
| ATOM | 255 | HE22 | GLN | 16 | -13.319 | 6.827  | -3.553 | 1.00 | 0.00 |
| ATOM | 256 | C    | GLN | 16 | -9.526  | 1.668  | -3.123 | 1.00 | 0.00 |
| ATOM | 257 | O    | GLN | 16 | -10.296 | 0.834  | -2.638 | 1.00 | 0.00 |
| ATOM | 258 | N    | MET | 17 | -8.271  | 1.393  | -3.471 | 1.00 | 0.00 |
| ATOM | 259 | H    | MET | 17 | -7.696  | 2.106  | -3.897 | 1.00 | 0.00 |
| ATOM | 260 | CA   | MET | 17 | -7.705  | 0.060  | -3.300 | 1.00 | 0.00 |
| ATOM | 261 | HA   | MET | 17 | -8.343  | -0.681 | -3.782 | 1.00 | 0.00 |
| ATOM | 262 | CB   | MET | 17 | -6.310  | -0.006 | -3.936 | 1.00 | 0.00 |
| ATOM | 263 | HB2  | MET | 17 | -6.154  | -1.005 | -4.344 | 1.00 | 0.00 |
| ATOM | 264 | HB3  | MET | 17 | -6.253  | 0.727  | -4.740 | 1.00 | 0.00 |
| ATOM | 265 | CG   | MET | 17 | -5.229  | 0.293  | -2.896 | 1.00 | 0.00 |

|      |     |          |    |        |        |        |      |      |
|------|-----|----------|----|--------|--------|--------|------|------|
| ATOM | 266 | HG2 MET  | 17 | -5.559 | 1.094  | -2.235 | 1.00 | 0.00 |
| ATOM | 267 | HG3 MET  | 17 | -5.022 | -0.601 | -2.307 | 1.00 | 0.00 |
| ATOM | 268 | SD MET   | 17 | -3.720 | 0.807  | -3.744 | 1.00 | 0.00 |
| ATOM | 269 | CE MET   | 17 | -4.350 | 2.382  | -4.372 | 1.00 | 0.00 |
| ATOM | 270 | HE1 MET  | 17 | -4.653 | 3.012  | -3.536 | 1.00 | 0.00 |
| ATOM | 271 | HE2 MET  | 17 | -3.568 | 2.885  | -4.941 | 1.00 | 0.00 |
| ATOM | 272 | HE3 MET  | 17 | -5.208 | 2.199  | -5.018 | 1.00 | 0.00 |
| ATOM | 273 | C MET    | 17 | -7.623 | -0.331 | -1.833 | 1.00 | 0.00 |
| ATOM | 274 | O MET    | 17 | -7.622 | -1.513 | -1.505 | 1.00 | 0.00 |
| ATOM | 275 | N LEU    | 18 | -7.541 | 0.670  | -0.965 | 1.00 | 0.00 |
| ATOM | 276 | H LEU    | 18 | -7.526 | 1.624  | -1.296 | 1.00 | 0.00 |
| ATOM | 277 | CA LEU   | 18 | -7.430 | 0.435  | 0.472  | 1.00 | 0.00 |
| ATOM | 278 | HA LEU   | 18 | -6.532 | -0.146 | 0.685  | 1.00 | 0.00 |
| ATOM | 279 | CB LEU   | 18 | -7.342 | 1.757  | 1.218  | 1.00 | 0.00 |
| ATOM | 280 | HB2 LEU  | 18 | -8.263 | 2.318  | 1.062  | 1.00 | 0.00 |
| ATOM | 281 | HB3 LEU  | 18 | -7.208 | 1.568  | 2.283  | 1.00 | 0.00 |
| ATOM | 282 | CG LEU   | 18 | -6.155 | 2.569  | 0.691  | 1.00 | 0.00 |
| ATOM | 283 | HG LEU   | 18 | -5.299 | 1.909  | 0.548  | 1.00 | 0.00 |
| ATOM | 284 | CD1 LEU  | 18 | -6.528 | 3.218  | -0.646 | 1.00 | 0.00 |
| ATOM | 285 | HD11 LEU | 18 | -7.383 | 3.878  | -0.503 | 1.00 | 0.00 |
| ATOM | 286 | HD12 LEU | 18 | -5.682 | 3.795  | -1.019 | 1.00 | 0.00 |
| ATOM | 287 | HD13 LEU | 18 | -6.784 | 2.442  | -1.368 | 1.00 | 0.00 |

|      |     |          |    |         |        |        |      |      |
|------|-----|----------|----|---------|--------|--------|------|------|
| ATOM | 288 | CD2 LEU  | 18 | -5.788  | 3.657  | 1.705  | 1.00 | 0.00 |
| ATOM | 289 | HD21 LEU | 18 | -5.517  | 3.193  | 2.654  | 1.00 | 0.00 |
| ATOM | 290 | HD22 LEU | 18 | -4.943  | 4.234  | 1.330  | 1.00 | 0.00 |
| ATOM | 291 | HD23 LEU | 18 | -6.641  | 4.318  | 1.855  | 1.00 | 0.00 |
| ATOM | 292 | C LEU    | 18 | -8.616  | -0.367 | 0.990  | 1.00 | 0.00 |
| ATOM | 293 | O LEU    | 18 | -8.509  | -1.030 | 2.013  | 1.00 | 0.00 |
| ATOM | 294 | N SER    | 19 | -9.745  | -0.317 | 0.287  | 1.00 | 0.00 |
| ATOM | 295 | H SER    | 19 | -9.823  | 0.252  | -0.544 | 1.00 | 0.00 |
| ATOM | 296 | CA SER   | 19 | -10.912 | -1.081 | 0.715  | 1.00 | 0.00 |
| ATOM | 297 | HA SER   | 19 | -11.151 | -0.845 | 1.752  | 1.00 | 0.00 |
| ATOM | 298 | CB SER   | 19 | -12.120 | -0.733 | -0.158 | 1.00 | 0.00 |
| ATOM | 299 | HB2 SER  | 19 | -11.947 | -1.079 | -1.177 | 1.00 | 0.00 |
| ATOM | 300 | HB3 SER  | 19 | -13.012 | -1.216 | 0.242  | 1.00 | 0.00 |
| ATOM | 301 | OG SER   | 19 | -12.305 | 0.677  | -0.161 | 1.00 | 0.00 |
| ATOM | 302 | HG SER   | 19 | -13.062 | 0.899  | -0.708 | 1.00 | 0.00 |
| ATOM | 303 | C SER    | 19 | -10.603 | -2.573 | 0.601  | 1.00 | 0.00 |
| ATOM | 304 | O SER    | 19 | -10.717 | -3.331 | 1.572  | 1.00 | 0.00 |
| ATOM | 305 | N HIE    | 20 | -10.170 | -2.973 | -0.593 | 1.00 | 0.00 |
| ATOM | 306 | H HIE    | 20 | -10.095 | -2.309 | -1.350 | 1.00 | 0.00 |
| ATOM | 307 | CA HIE   | 20 | -9.803  | -4.361 | -0.851 | 1.00 | 0.00 |
| ATOM | 308 | HA HIE   | 20 | -10.579 | -5.027 | -0.474 | 1.00 | 0.00 |
| ATOM | 309 | CB HIE   | 20 | -9.644  | -4.598 | -2.360 | 1.00 | 0.00 |

|      |     |         |    |         |        |        |      |      |
|------|-----|---------|----|---------|--------|--------|------|------|
| ATOM | 310 | HB2 HIE | 20 | -8.607  | -4.562 | -2.693 | 1.00 | 0.00 |
| ATOM | 311 | HB3 HIE | 20 | -10.086 | -5.550 | -2.653 | 1.00 | 0.00 |
| ATOM | 312 | CG HIE  | 20 | -10.379 | -3.528 | -3.122 | 1.00 | 0.00 |
| ATOM | 313 | ND1 HIE | 20 | -9.726  | -2.639 | -3.960 | 1.00 | 0.00 |
| ATOM | 314 | CE1 HIE | 20 | -10.651 | -1.804 | -4.466 | 1.00 | 0.00 |
| ATOM | 315 | HE1 HIE | 20 | -10.304 | -1.033 | -5.154 | 1.00 | 0.00 |
| ATOM | 316 | NE2 HIE | 20 | -11.874 | -2.087 | -4.012 | 1.00 | 0.00 |
| ATOM | 317 | HE2 HIE | 20 | -12.757 | -1.639 | -4.210 | 1.00 | 0.00 |
| ATOM | 318 | CD2 HIE | 20 | -11.705 | -3.177 | -3.164 | 1.00 | 0.00 |
| ATOM | 319 | HD2 HIE | 20 | -12.566 | -3.612 | -2.657 | 1.00 | 0.00 |
| ATOM | 320 | C HIE   | 20 | -8.492  | -4.660 | -0.143 | 1.00 | 0.00 |
| ATOM | 321 | O HIE   | 20 | -8.278  | -5.755 | 0.376  | 1.00 | 0.00 |
| ATOM | 322 | N CYX   | 21 | -7.625  | -3.654 | -0.121 | 1.00 | 0.00 |
| ATOM | 323 | H CYX   | 21 | -7.848  | -2.791 | -0.595 | 1.00 | 0.00 |
| ATOM | 324 | CA CYX  | 21 | -6.335  | -3.766 | 0.531  | 1.00 | 0.00 |
| ATOM | 325 | HA CYX  | 21 | -5.762  | -4.593 | 0.112  | 1.00 | 0.00 |
| ATOM | 326 | CB CYX  | 21 | -5.554  | -2.464 | 0.305  | 1.00 | 0.00 |
| ATOM | 327 | HB2 CYX | 21 | -6.243  | -1.673 | 0.012  | 1.00 | 0.00 |
| ATOM | 328 | HB3 CYX | 21 | -5.046  | -2.180 | 1.227  | 1.00 | 0.00 |
| ATOM | 329 | SG CYX  | 21 | -4.358  | -2.724 | -1.030 | 1.00 | 0.00 |
| ATOM | 330 | C CYX   | 21 | -6.537  | -4.045 | 2.020  | 1.00 | 0.00 |
| ATOM | 331 | O CYX   | 21 | -5.924  | -4.954 | 2.582  | 1.00 | 0.00 |

|      |     |      |     |    |         |        |       |      |      |
|------|-----|------|-----|----|---------|--------|-------|------|------|
| ATOM | 332 | N    | ARG | 22 | -7.437  | -3.288 | 2.641 | 1.00 | 0.00 |
| ATOM | 333 | H    | ARG | 22 | -7.913  | -2.546 | 2.149 | 1.00 | 0.00 |
| ATOM | 334 | CA   | ARG | 22 | -7.753  | -3.497 | 4.047 | 1.00 | 0.00 |
| ATOM | 335 | HA   | ARG | 22 | -6.861  | -3.345 | 4.655 | 1.00 | 0.00 |
| ATOM | 336 | CB   | ARG | 22 | -8.829  | -2.506 | 4.500 | 1.00 | 0.00 |
| ATOM | 337 | HB2  | ARG | 22 | -8.530  | -1.497 | 4.217 | 1.00 | 0.00 |
| ATOM | 338 | HB3  | ARG | 22 | -9.773  | -2.755 | 4.016 | 1.00 | 0.00 |
| ATOM | 339 | CG   | ARG | 22 | -9.001  | -2.579 | 6.020 | 1.00 | 0.00 |
| ATOM | 340 | HG2  | ARG | 22 | -9.220  | -3.606 | 6.313 | 1.00 | 0.00 |
| ATOM | 341 | HG3  | ARG | 22 | -8.082  | -2.252 | 6.507 | 1.00 | 0.00 |
| ATOM | 342 | CD   | ARG | 22 | -10.157 | -1.669 | 6.447 | 1.00 | 0.00 |
| ATOM | 343 | HD2  | ARG | 22 | -11.098 | -2.057 | 6.057 | 1.00 | 0.00 |
| ATOM | 344 | HD3  | ARG | 22 | -10.208 | -1.620 | 7.535 | 1.00 | 0.00 |
| ATOM | 345 | NE   | ARG | 22 | -9.955  | -0.318 | 5.926 | 1.00 | 0.00 |
| ATOM | 346 | HE   | ARG | 22 | -9.333  | 0.319  | 6.404 | 1.00 | 0.00 |
| ATOM | 347 | CZ   | ARG | 22 | -10.577 | 0.106  | 4.823 | 1.00 | 0.00 |
| ATOM | 348 | NH1  | ARG | 22 | -11.406 | -0.680 | 4.188 | 1.00 | 0.00 |
| ATOM | 349 | HH11 | ARG | 22 | -11.577 | -1.614 | 4.534 | 1.00 | 0.00 |
| ATOM | 350 | HH12 | ARG | 22 | -11.871 | -0.351 | 3.355 | 1.00 | 0.00 |
| ATOM | 351 | NH2  | ARG | 22 | -10.356 | 1.311  | 4.374 | 1.00 | 0.00 |
| ATOM | 352 | HH21 | ARG | 22 | -9.714  | 1.919  | 4.863 | 1.00 | 0.00 |
| ATOM | 353 | HH22 | ARG | 22 | -10.827 | 1.630  | 3.540 | 1.00 | 0.00 |

|      |     |     |     |    |         |        |        |      |      |
|------|-----|-----|-----|----|---------|--------|--------|------|------|
| ATOM | 354 | C   | ARG | 22 | -8.250  | -4.923 | 4.218  | 1.00 | 0.00 |
| ATOM | 355 | O   | ARG | 22 | -7.820  | -5.650 | 5.121  | 1.00 | 0.00 |
| ATOM | 356 | N   | MET | 23 | -9.141  | -5.329 | 3.307  | 1.00 | 0.00 |
| ATOM | 357 | H   | MET | 23 | -9.477  | -4.699 | 2.594  | 1.00 | 0.00 |
| ATOM | 358 | CA  | MET | 23 | -9.665  | -6.684 | 3.332  | 1.00 | 0.00 |
| ATOM | 359 | HA  | MET | 23 | -10.215 | -6.852 | 4.258  | 1.00 | 0.00 |
| ATOM | 360 | CB  | MET | 23 | -10.615 | -6.909 | 2.149  | 1.00 | 0.00 |
| ATOM | 361 | HB2 | MET | 23 | -11.368 | -6.121 | 2.136  | 1.00 | 0.00 |
| ATOM | 362 | HB3 | MET | 23 | -10.046 | -6.883 | 1.220  | 1.00 | 0.00 |
| ATOM | 363 | CG  | MET | 23 | -11.303 | -8.269 | 2.288  | 1.00 | 0.00 |
| ATOM | 364 | HG2 | MET | 23 | -10.552 | -9.055 | 2.373  | 1.00 | 0.00 |
| ATOM | 365 | HG3 | MET | 23 | -11.934 | -8.274 | 3.177  | 1.00 | 0.00 |
| ATOM | 366 | SD  | MET | 23 | -12.328 | -8.579 | 0.828  | 1.00 | 0.00 |
| ATOM | 367 | CE  | MET | 23 | -10.981 | -8.904 | -0.338 | 1.00 | 0.00 |
| ATOM | 368 | HE1 | MET | 23 | -10.398 | -9.758 | 0.008  | 1.00 | 0.00 |
| ATOM | 369 | HE2 | MET | 23 | -11.396 | -9.123 | -1.322 | 1.00 | 0.00 |
| ATOM | 370 | HE3 | MET | 23 | -10.336 | -8.028 | -0.403 | 1.00 | 0.00 |
| ATOM | 371 | C   | MET | 23 | -8.500  | -7.664 | 3.263  | 1.00 | 0.00 |
| ATOM | 372 | O   | MET | 23 | -8.500  | -8.692 | 3.937  | 1.00 | 0.00 |
| ATOM | 373 | N   | TYR | 24 | -7.498  | -7.315 | 2.452  | 1.00 | 0.00 |
| ATOM | 374 | H   | TYR | 24 | -7.572  | -6.482 | 1.886  | 1.00 | 0.00 |
| ATOM | 375 | CA  | TYR | 24 | -6.307  | -8.145 | 2.309  | 1.00 | 0.00 |



|      |     |     |     |    |        |        |       |      |      |
|------|-----|-----|-----|----|--------|--------|-------|------|------|
| ATOM | 376 | HA  | TYR | 24 | -6.583 | -9.142 | 1.964 | 1.00 | 0.00 |
| ATOM | 377 | CB  | TYR | 24 | -5.349 | -7.514 | 1.277 | 1.00 | 0.00 |
| ATOM | 378 | HB2 | TYR | 24 | -5.341 | -8.129 | 0.377 | 1.00 | 0.00 |
| ATOM | 379 | HB3 | TYR | 24 | -5.728 | -6.521 | 1.036 | 1.00 | 0.00 |
| ATOM | 380 | CG  | TYR | 24 | -3.936 | -7.397 | 1.821 | 1.00 | 0.00 |
| ATOM | 381 | CD1 | TYR | 24 | -3.239 | -8.539 | 2.232 | 1.00 | 0.00 |
| ATOM | 382 | HD1 | TYR | 24 | -3.713 | -9.519 | 2.171 | 1.00 | 0.00 |
| ATOM | 383 | CE1 | TYR | 24 | -1.932 | -8.423 | 2.722 | 1.00 | 0.00 |
| ATOM | 384 | HE1 | TYR | 24 | -1.392 | -9.312 | 3.050 | 1.00 | 0.00 |
| ATOM | 385 | CZ  | TYR | 24 | -1.321 | -7.166 | 2.795 | 1.00 | 0.00 |
| ATOM | 386 | OH  | TYR | 24 | -0.031 | -7.052 | 3.271 | 1.00 | 0.00 |
| ATOM | 387 | HH  | TYR | 24 | 0.352  | -7.896 | 3.524 | 1.00 | 0.00 |
| ATOM | 388 | CE2 | TYR | 24 | -2.015 | -6.026 | 2.382 | 1.00 | 0.00 |
| ATOM | 389 | HE2 | TYR | 24 | -1.538 | -5.048 | 2.439 | 1.00 | 0.00 |
| ATOM | 390 | CD2 | TYR | 24 | -3.322 | -6.140 | 1.895 | 1.00 | 0.00 |
| ATOM | 391 | HD2 | TYR | 24 | -3.863 | -5.251 | 1.573 | 1.00 | 0.00 |
| ATOM | 392 | C   | TYR | 24 | -5.631 | -8.316 | 3.667 | 1.00 | 0.00 |
| ATOM | 393 | O   | TYR | 24 | -5.225 | -9.416 | 4.031 | 1.00 | 0.00 |
| ATOM | 394 | N   | MET | 25 | -5.525 | -7.224 | 4.423 | 1.00 | 0.00 |
| ATOM | 395 | H   | MET | 25 | -5.866 | -6.330 | 4.102 | 1.00 | 0.00 |
| ATOM | 396 | CA  | MET | 25 | -4.911 | -7.296 | 5.746 | 1.00 | 0.00 |
| ATOM | 397 | HA  | MET | 25 | -3.862 | -7.580 | 5.656 | 1.00 | 0.00 |

|      |     |     |     |    |         |        |       |      |      |
|------|-----|-----|-----|----|---------|--------|-------|------|------|
| ATOM | 398 | CB  | MET | 25 | -4.991  | -5.934 | 6.437 | 1.00 | 0.00 |
| ATOM | 399 | HB2 | MET | 25 | -6.037  | -5.660 | 6.571 | 1.00 | 0.00 |
| ATOM | 400 | HB3 | MET | 25 | -4.505  | -5.996 | 7.411 | 1.00 | 0.00 |
| ATOM | 401 | CG  | MET | 25 | -4.289  | -4.871 | 5.582 | 1.00 | 0.00 |
| ATOM | 402 | HG2 | MET | 25 | -4.705  | -4.879 | 4.575 | 1.00 | 0.00 |
| ATOM | 403 | HG3 | MET | 25 | -4.436  | -3.888 | 6.029 | 1.00 | 0.00 |
| ATOM | 404 | SD  | MET | 25 | -2.517  | -5.226 | 5.495 | 1.00 | 0.00 |
| ATOM | 405 | CE  | MET | 25 | -2.109  | -4.778 | 7.200 | 1.00 | 0.00 |
| ATOM | 406 | HE1 | MET | 25 | -2.674  | -5.408 | 7.887 | 1.00 | 0.00 |
| ATOM | 407 | HE2 | MET | 25 | -1.042  | -4.924 | 7.369 | 1.00 | 0.00 |
| ATOM | 408 | HE3 | MET | 25 | -2.364  | -3.733 | 7.373 | 1.00 | 0.00 |
| ATOM | 409 | C   | MET | 25 | -5.656  | -8.330 | 6.585 | 1.00 | 0.00 |
| ATOM | 410 | O   | MET | 25 | -5.058  | -9.248 | 7.166 | 1.00 | 0.00 |
| ATOM | 411 | N   | ARG | 26 | -6.981  | -8.196 | 6.613 | 1.00 | 0.00 |
| ATOM | 412 | H   | ARG | 26 | -7.435  | -7.428 | 6.141 | 1.00 | 0.00 |
| ATOM | 413 | CA  | ARG | 26 | -7.808  | -9.141 | 7.346 | 1.00 | 0.00 |
| ATOM | 414 | HA  | ARG | 26 | -7.532  | -9.137 | 8.401 | 1.00 | 0.00 |
| ATOM | 415 | CB  | ARG | 26 | -9.287  | -8.753 | 7.224 | 1.00 | 0.00 |
| ATOM | 416 | HB2 | ARG | 26 | -9.418  | -7.725 | 7.560 | 1.00 | 0.00 |
| ATOM | 417 | HB3 | ARG | 26 | -9.596  | -8.837 | 6.182 | 1.00 | 0.00 |
| ATOM | 418 | CG  | ARG | 26 | -10.144 | -9.685 | 8.088 | 1.00 | 0.00 |
| ATOM | 419 | HG2 | ARG | 26 | -11.196 | -9.532 | 7.848 | 1.00 | 0.00 |

|      |     |          |    |         |         |        |      |      |
|------|-----|----------|----|---------|---------|--------|------|------|
| ATOM | 420 | HG3 ARG  | 26 | -9.871  | -10.720 | 7.880  | 1.00 | 0.00 |
| ATOM | 421 | CD ARG   | 26 | -9.910  | -9.384  | 9.571  | 1.00 | 0.00 |
| ATOM | 422 | HD2 ARG  | 26 | -8.848  | -9.463  | 9.804  | 1.00 | 0.00 |
| ATOM | 423 | HD3 ARG  | 26 | -10.259 | -8.379  | 9.806  | 1.00 | 0.00 |
| ATOM | 424 | NE ARG   | 26 | -10.642 | -10.340 | 10.399 | 1.00 | 0.00 |
| ATOM | 425 | HE ARG   | 26 | -11.551 | -10.669 | 10.106 | 1.00 | 0.00 |
| ATOM | 426 | CZ ARG   | 26 | -10.139 | -10.798 | 11.546 | 1.00 | 0.00 |
| ATOM | 427 | NH1 ARG  | 26 | -8.971  | -10.392 | 11.965 | 1.00 | 0.00 |
| ATOM | 428 | HH11 ARG | 26 | -8.444  | -9.727  | 11.417 | 1.00 | 0.00 |
| ATOM | 429 | HH12 ARG | 26 | -8.599  | -10.746 | 12.835 | 1.00 | 0.00 |
| ATOM | 430 | NH2 ARG  | 26 | -10.820 | -11.657 | 12.253 | 1.00 | 0.00 |
| ATOM | 431 | HH21 ARG | 26 | -11.723 | -11.971 | 11.928 | 1.00 | 0.00 |
| ATOM | 432 | HH22 ARG | 26 | -10.440 | -12.005 | 13.122 | 1.00 | 0.00 |
| ATOM | 433 | C ARG    | 26 | -7.574  | -10.534 | 6.776  | 1.00 | 0.00 |
| ATOM | 434 | O ARG    | 26 | -7.465  | -11.521 | 7.511  | 1.00 | 0.00 |
| ATOM | 435 | N GLN    | 27 | -7.457  | -10.594 | 5.454  | 1.00 | 0.00 |
| ATOM | 436 | H GLN    | 27 | -7.581  | -9.766  | 4.889  | 1.00 | 0.00 |
| ATOM | 437 | CA GLN   | 27 | -7.192  | -11.847 | 4.784  | 1.00 | 0.00 |
| ATOM | 438 | HA GLN   | 27 | -7.986  | -12.559 | 5.009  | 1.00 | 0.00 |
| ATOM | 439 | CB GLN   | 27 | -7.129  | -11.647 | 3.262  | 1.00 | 0.00 |
| ATOM | 440 | HB2 GLN  | 27 | -8.107  | -11.330 | 2.902  | 1.00 | 0.00 |
| ATOM | 441 | HB3 GLN  | 27 | -6.390  | -10.879 | 3.032  | 1.00 | 0.00 |

|      |     |      |     |    |        |         |       |      |      |
|------|-----|------|-----|----|--------|---------|-------|------|------|
| ATOM | 442 | CG   | GLN | 27 | -6.732 | -12.961 | 2.574 | 1.00 | 0.00 |
| ATOM | 443 | HG2  | GLN | 27 | -6.848 | -12.855 | 1.496 | 1.00 | 0.00 |
| ATOM | 444 | HG3  | GLN | 27 | -5.696 | -13.211 | 2.805 | 1.00 | 0.00 |
| ATOM | 445 | CD   | GLN | 27 | -7.625 | -14.101 | 3.050 | 1.00 | 0.00 |
| ATOM | 446 | OE1  | GLN | 27 | -8.467 | -14.593 | 2.299 | 1.00 | 0.00 |
| ATOM | 447 | NE2  | GLN | 27 | -7.492 | -14.542 | 4.270 | 1.00 | 0.00 |
| ATOM | 448 | HE21 | GLN | 27 | -8.077 | -15.297 | 4.598 | 1.00 | 0.00 |
| ATOM | 449 | HE22 | GLN | 27 | -6.804 | -14.127 | 4.882 | 1.00 | 0.00 |
| ATOM | 450 | C    | GLN | 27 | -5.885 | -12.418 | 5.304 | 1.00 | 0.00 |
| ATOM | 451 | O    | GLN | 27 | -5.751 | -13.616 | 5.502 | 1.00 | 0.00 |
| ATOM | 452 | N    | GLN | 28 | -4.920 | -11.556 | 5.560 | 1.00 | 0.00 |
| ATOM | 453 | H    | GLN | 28 | -5.029 | -10.564 | 5.408 | 1.00 | 0.00 |
| ATOM | 454 | CA   | GLN | 28 | -3.665 | -12.032 | 6.073 | 1.00 | 0.00 |
| ATOM | 455 | HA   | GLN | 28 | -3.201 | -12.717 | 5.363 | 1.00 | 0.00 |
| ATOM | 456 | CB   | GLN | 28 | -2.736 | -10.863 | 6.294 | 1.00 | 0.00 |
| ATOM | 457 | HB2  | GLN | 28 | -2.683 | -10.272 | 5.380 | 1.00 | 0.00 |
| ATOM | 458 | HB3  | GLN | 28 | -3.125 | -10.246 | 7.104 | 1.00 | 0.00 |
| ATOM | 459 | CG   | GLN | 28 | -1.334 | -11.362 | 6.661 | 1.00 | 0.00 |
| ATOM | 460 | HG2  | GLN | 28 | -1.094 | -12.253 | 6.081 | 1.00 | 0.00 |
| ATOM | 461 | HG3  | GLN | 28 | -0.598 | -10.585 | 6.454 | 1.00 | 0.00 |
| ATOM | 462 | CD   | GLN | 28 | -1.267 | -11.714 | 8.145 | 1.00 | 0.00 |
| ATOM | 463 | OE1  | GLN | 28 | -0.829 | -12.889 | 8.507 | 1.00 | 0.00 |

|      |     |      |     |    |        |         |        |      |      |
|------|-----|------|-----|----|--------|---------|--------|------|------|
| ATOM | 464 | NE2  | GLN | 28 | -1.623 | -10.898 | 8.996  | 1.00 | 0.00 |
| ATOM | 465 | HE21 | GLN | 28 | -1.574 | -11.141 | 9.976  | 1.00 | 0.00 |
| ATOM | 466 | HE22 | GLN | 28 | -1.961 | -9.991  | 8.711  | 1.00 | 0.00 |
| ATOM | 467 | C    | GLN | 28 | -3.907 | -12.749 | 7.390  | 1.00 | 0.00 |
| ATOM | 468 | O    | GLN | 28 | -3.300 | -13.785 | 7.666  | 1.00 | 0.00 |
| ATOM | 469 | N    | MET | 29 | -4.812 | -12.193 | 8.198  | 1.00 | 0.00 |
| ATOM | 470 | H    | MET | 29 | -5.276 | -11.332 | 7.949  | 1.00 | 0.00 |
| ATOM | 471 | CA   | MET | 29 | -5.133 | -12.806 | 9.484  | 1.00 | 0.00 |
| ATOM | 472 | HA   | MET | 29 | -4.233 | -12.870 | 10.097 | 1.00 | 0.00 |
| ATOM | 473 | CB   | MET | 29 | -6.177 | -11.971 | 10.233 | 1.00 | 0.00 |
| ATOM | 474 | HB2  | MET | 29 | -6.988 | -11.711 | 9.554  | 1.00 | 0.00 |
| ATOM | 475 | HB3  | MET | 29 | -6.573 | -12.550 | 11.067 | 1.00 | 0.00 |
| ATOM | 476 | CG   | MET | 29 | -5.528 | -10.692 | 10.764 | 1.00 | 0.00 |
| ATOM | 477 | HG2  | MET | 29 | -5.148 | -10.096 | 9.935  | 1.00 | 0.00 |
| ATOM | 478 | HG3  | MET | 29 | -6.259 | -10.110 | 11.325 | 1.00 | 0.00 |
| ATOM | 479 | SD   | MET | 29 | -4.155 | -11.134 | 11.857 | 1.00 | 0.00 |
| ATOM | 480 | CE   | MET | 29 | -5.115 | -12.085 | 13.064 | 1.00 | 0.00 |
| ATOM | 481 | HE1  | MET | 29 | -5.597 | -12.925 | 12.565 | 1.00 | 0.00 |
| ATOM | 482 | HE2  | MET | 29 | -4.451 | -12.459 | 13.844 | 1.00 | 0.00 |
| ATOM | 483 | HE3  | MET | 29 | -5.874 | -11.444 | 13.512 | 1.00 | 0.00 |
| ATOM | 484 | C    | MET | 29 | -5.664 | -14.221 | 9.279  | 1.00 | 0.00 |
| ATOM | 485 | O    | MET | 29 | -5.119 | -15.177 | 9.828  | 1.00 | 0.00 |

|      |     |     |     |    |         |         |       |      |      |
|------|-----|-----|-----|----|---------|---------|-------|------|------|
| ATOM | 486 | N   | GLU | 30 | -6.717  | -14.358 | 8.473 | 1.00 | 0.00 |
| ATOM | 487 | H   | GLU | 30 | -7.163  | -13.557 | 8.051 | 1.00 | 0.00 |
| ATOM | 488 | CA  | GLU | 30 | -7.275  | -15.685 | 8.205 | 1.00 | 0.00 |
| ATOM | 489 | HA  | GLU | 30 | -7.482  | -16.195 | 9.146 | 1.00 | 0.00 |
| ATOM | 490 | CB  | GLU | 30 | -8.581  | -15.570 | 7.412 | 1.00 | 0.00 |
| ATOM | 491 | HB2 | GLU | 30 | -8.415  | -14.952 | 6.530 | 1.00 | 0.00 |
| ATOM | 492 | HB3 | GLU | 30 | -8.904  | -16.564 | 7.103 | 1.00 | 0.00 |
| ATOM | 493 | CG  | GLU | 30 | -9.663  | -14.931 | 8.287 | 1.00 | 0.00 |
| ATOM | 494 | HG2 | GLU | 30 | -10.644 | -15.282 | 7.968 | 1.00 | 0.00 |
| ATOM | 495 | HG3 | GLU | 30 | -9.493  | -15.222 | 9.324 | 1.00 | 0.00 |
| ATOM | 496 | CD  | GLU | 30 | -9.604  | -13.412 | 8.170 | 1.00 | 0.00 |
| ATOM | 497 | OE1 | GLU | 30 | -9.745  | -12.917 | 7.063 | 1.00 | 0.00 |
| ATOM | 498 | OE2 | GLU | 30 | -9.427  | -12.765 | 9.190 | 1.00 | 0.00 |
| ATOM | 499 | C   | GLU | 30 | -6.276  | -16.537 | 7.423 | 1.00 | 0.00 |
| ATOM | 500 | O   | GLU | 30 | -6.093  | -17.722 | 7.700 | 1.00 | 0.00 |
| ATOM | 501 | N   | GLU | 31 | -5.642  | -15.907 | 6.436 | 1.00 | 0.00 |
| ATOM | 502 | H   | GLU | 31 | -5.863  | -14.941 | 6.245 | 1.00 | 0.00 |
| ATOM | 503 | CA  | GLU | 31 | -4.660  | -16.575 | 5.584 | 1.00 | 0.00 |
| ATOM | 504 | HA  | GLU | 31 | -5.070  | -17.507 | 5.194 | 1.00 | 0.00 |
| ATOM | 505 | CB  | GLU | 31 | -4.300  | -15.666 | 4.403 | 1.00 | 0.00 |
| ATOM | 506 | HB2 | GLU | 31 | -5.208  | -15.205 | 4.016 | 1.00 | 0.00 |
| ATOM | 507 | HB3 | GLU | 31 | -3.616  | -14.889 | 4.744 | 1.00 | 0.00 |

|      |     |     |     |    |        |         |        |      |      |
|------|-----|-----|-----|----|--------|---------|--------|------|------|
| ATOM | 508 | CG  | GLU | 31 | -3.629 | -16.486 | 3.293  | 1.00 | 0.00 |
| ATOM | 509 | HG2 | GLU | 31 | -2.771 | -17.012 | 3.711  | 1.00 | 0.00 |
| ATOM | 510 | HG3 | GLU | 31 | -4.346 | -17.211 | 2.907  | 1.00 | 0.00 |
| ATOM | 511 | CD  | GLU | 31 | -3.163 | -15.574 | 2.155  | 1.00 | 0.00 |
| ATOM | 512 | OE1 | GLU | 31 | -3.304 | -14.366 | 2.281  | 1.00 | 0.00 |
| ATOM | 513 | OE2 | GLU | 31 | -2.669 | -16.100 | 1.170  | 1.00 | 0.00 |
| ATOM | 514 | C   | GLU | 31 | -3.395 | -16.939 | 6.369  | 1.00 | 0.00 |
| ATOM | 515 | O   | GLU | 31 | -2.489 | -17.565 | 5.827  | 1.00 | 0.00 |
| ATOM | 516 | N   | SER | 32 | -3.334 | -16.533 | 7.639  | 1.00 | 0.00 |
| ATOM | 517 | H   | SER | 32 | -4.094 | -16.000 | 8.037  | 1.00 | 0.00 |
| ATOM | 518 | CA  | SER | 32 | -2.166 | -16.812 | 8.481  | 1.00 | 0.00 |
| ATOM | 519 | HA  | SER | 32 | -1.339 | -16.160 | 8.200  | 1.00 | 0.00 |
| ATOM | 520 | CB  | SER | 32 | -2.507 | -16.563 | 9.950  | 1.00 | 0.00 |
| ATOM | 521 | HB2 | SER | 32 | -1.623 | -16.738 | 10.564 | 1.00 | 0.00 |
| ATOM | 522 | HB3 | SER | 32 | -2.839 | -15.533 | 10.078 | 1.00 | 0.00 |
| ATOM | 523 | OG  | SER | 32 | -3.545 | -17.449 | 10.350 | 1.00 | 0.00 |
| ATOM | 524 | HG  | SER | 32 | -3.760 | -17.294 | 11.273 | 1.00 | 0.00 |
| ATOM | 525 | C   | SER | 32 | -1.697 | -18.253 | 8.300  | 1.00 | 0.00 |
| ATOM | 526 | O   | SER | 32 | -0.539 | -18.575 | 8.565  | 1.00 | 0.00 |
| ATOM | 527 | N   | THR | 33 | -2.605 | -19.111 | 7.848  | 1.00 | 0.00 |
| ATOM | 528 | H   | THR | 33 | -3.554 | -18.807 | 7.686  | 1.00 | 0.00 |
| ATOM | 529 | CA  | THR | 33 | -2.277 | -20.509 | 7.605  | 1.00 | 0.00 |

|      |     |      |     |    |        |         |       |      |      |
|------|-----|------|-----|----|--------|---------|-------|------|------|
| ATOM | 530 | HA   | THR | 33 | -1.645 | -20.894 | 8.406 | 1.00 | 0.00 |
| ATOM | 531 | CB   | THR | 33 | -3.564 | -21.340 | 7.555 | 1.00 | 0.00 |
| ATOM | 532 | HB   | THR | 33 | -3.320 | -22.371 | 7.296 | 1.00 | 0.00 |
| ATOM | 533 | CG2  | THR | 33 | -4.252 | -21.307 | 8.922 | 1.00 | 0.00 |
| ATOM | 534 | HG21 | THR | 33 | -4.497 | -20.277 | 9.182 | 1.00 | 0.00 |
| ATOM | 535 | HG22 | THR | 33 | -5.166 | -21.899 | 8.884 | 1.00 | 0.00 |
| ATOM | 536 | HG23 | THR | 33 | -3.583 | -21.722 | 9.676 | 1.00 | 0.00 |
| ATOM | 537 | OG1  | THR | 33 | -4.438 | -20.800 | 6.572 | 1.00 | 0.00 |
| ATOM | 538 | HG1  | THR | 33 | -5.244 | -21.320 | 6.541 | 1.00 | 0.00 |
| ATOM | 539 | C    | THR | 33 | -1.500 | -20.683 | 6.288 | 1.00 | 0.00 |
| ATOM | 540 | O    | THR | 33 | -0.393 | -21.221 | 6.273 | 1.00 | 0.00 |
| ATOM | 541 | N    | TYR | 34 | -2.129 | -20.262 | 5.181 | 1.00 | 0.00 |
| ATOM | 542 | H    | TYR | 34 | -3.051 | -19.859 | 5.265 | 1.00 | 0.00 |
| ATOM | 543 | CA   | TYR | 34 | -1.549 | -20.405 | 3.834 | 1.00 | 0.00 |
| ATOM | 544 | HA   | TYR | 34 | -0.762 | -21.160 | 3.837 | 1.00 | 0.00 |
| ATOM | 545 | CB   | TYR | 34 | -2.644 | -20.843 | 2.857 | 1.00 | 0.00 |
| ATOM | 546 | HB2  | TYR | 34 | -3.413 | -20.073 | 2.801 | 1.00 | 0.00 |
| ATOM | 547 | HB3  | TYR | 34 | -2.207 | -20.992 | 1.870 | 1.00 | 0.00 |
| ATOM | 548 | CG   | TYR | 34 | -3.261 | -22.137 | 3.335 | 1.00 | 0.00 |
| ATOM | 549 | CD1  | TYR | 34 | -2.583 | -23.348 | 3.148 | 1.00 | 0.00 |
| ATOM | 550 | HD1  | TYR | 34 | -1.610 | -23.358 | 2.656 | 1.00 | 0.00 |
| ATOM | 551 | CE1  | TYR | 34 | -3.154 | -24.546 | 3.593 | 1.00 | 0.00 |



|      |     |     |     |    |        |         |       |      |      |
|------|-----|-----|-----|----|--------|---------|-------|------|------|
| ATOM | 552 | HE1 | TYR | 34 | -2.626 | -25.489 | 3.447 | 1.00 | 0.00 |
| ATOM | 553 | CZ  | TYR | 34 | -4.403 | -24.534 | 4.226 | 1.00 | 0.00 |
| ATOM | 554 | OH  | TYR | 34 | -4.965 | -25.715 | 4.664 | 1.00 | 0.00 |
| ATOM | 555 | HH  | TYR | 34 | -4.415 | -26.482 | 4.484 | 1.00 | 0.00 |
| ATOM | 556 | CE2 | TYR | 34 | -5.080 | -23.323 | 4.413 | 1.00 | 0.00 |
| ATOM | 557 | HE2 | TYR | 34 | -6.052 | -23.314 | 4.906 | 1.00 | 0.00 |
| ATOM | 558 | CD2 | TYR | 34 | -4.510 | -22.126 | 3.969 | 1.00 | 0.00 |
| ATOM | 559 | HD2 | TYR | 34 | -5.037 | -21.184 | 4.116 | 1.00 | 0.00 |
| ATOM | 560 | C   | TYR | 34 | -0.884 | -19.127 | 3.293 | 1.00 | 0.00 |
| ATOM | 561 | O   | TYR | 34 | -0.500 | -19.095 | 2.123 | 1.00 | 0.00 |
| ATOM | 562 | N   | GLN | 35 | -0.794 | -18.073 | 4.107 | 1.00 | 0.00 |
| ATOM | 563 | H   | GLN | 35 | -1.149 | -18.129 | 5.051 | 1.00 | 0.00 |
| ATOM | 564 | CA  | GLN | 35 | -0.214 | -16.793 | 3.652 | 1.00 | 0.00 |
| ATOM | 565 | HA  | GLN | 35 | -0.984 | -16.208 | 3.151 | 1.00 | 0.00 |
| ATOM | 566 | CB  | GLN | 35 | 0.338  | -15.974 | 4.825 | 1.00 | 0.00 |
| ATOM | 567 | HB2 | GLN | 35 | 0.543  | -14.960 | 4.483 | 1.00 | 0.00 |
| ATOM | 568 | HB3 | GLN | 35 | -0.408 | -15.946 | 5.620 | 1.00 | 0.00 |
| ATOM | 569 | CG  | GLN | 35 | 1.633  | -16.604 | 5.361 | 1.00 | 0.00 |
| ATOM | 570 | HG2 | GLN | 35 | 2.353  | -16.732 | 4.552 | 1.00 | 0.00 |
| ATOM | 571 | HG3 | GLN | 35 | 2.063  | -15.963 | 6.131 | 1.00 | 0.00 |
| ATOM | 572 | CD  | GLN | 35 | 1.341  | -17.967 | 5.971 | 1.00 | 0.00 |
| ATOM | 573 | OE1 | GLN | 35 | 0.138  | -18.225 | 6.388 | 1.00 | 0.00 |

|      |     |      |     |    |       |         |        |      |      |
|------|-----|------|-----|----|-------|---------|--------|------|------|
| ATOM | 574 | NE2  | GLN | 35 | 2.227 | -18.815 | 6.064  | 1.00 | 0.00 |
| ATOM | 575 | HE21 | GLN | 35 | 2.019 | -19.716 | 6.471  | 1.00 | 0.00 |
| ATOM | 576 | HE22 | GLN | 35 | 3.158 | -18.607 | 5.733  | 1.00 | 0.00 |
| ATOM | 577 | C    | GLN | 35 | 0.910 | -16.976 | 2.643  | 1.00 | 0.00 |
| ATOM | 578 | O    | GLN | 35 | 1.102 | -16.120 | 1.778  | 1.00 | 0.00 |
| ATOM | 579 | N    | THR | 36 | 1.658 | -18.070 | 2.745  | 1.00 | 0.00 |
| ATOM | 580 | H    | THR | 36 | 1.503 | -18.763 | 3.463  | 1.00 | 0.00 |
| ATOM | 581 | CA   | THR | 36 | 2.748 | -18.280 | 1.810  | 1.00 | 0.00 |
| ATOM | 582 | HA   | THR | 36 | 3.471 | -17.468 | 1.889  | 1.00 | 0.00 |
| ATOM | 583 | CB   | THR | 36 | 3.460 | -19.601 | 2.120  | 1.00 | 0.00 |
| ATOM | 584 | HB   | THR | 36 | 2.784 | -20.432 | 1.918  | 1.00 | 0.00 |
| ATOM | 585 | CG2  | THR | 36 | 4.708 | -19.734 | 1.243  | 1.00 | 0.00 |
| ATOM | 586 | HG21 | THR | 36 | 5.385 | -18.904 | 1.445  | 1.00 | 0.00 |
| ATOM | 587 | HG22 | THR | 36 | 5.212 | -20.675 | 1.467  | 1.00 | 0.00 |
| ATOM | 588 | HG23 | THR | 36 | 4.418 | -19.719 | 0.193  | 1.00 | 0.00 |
| ATOM | 589 | OG1  | THR | 36 | 3.838 | -19.621 | 3.489  | 1.00 | 0.00 |
| ATOM | 590 | HG1  | THR | 36 | 4.285 | -20.448 | 3.686  | 1.00 | 0.00 |
| ATOM | 591 | C    | THR | 36 | 2.186 | -18.309 | 0.395  | 1.00 | 0.00 |
| ATOM | 592 | O    | THR | 36 | 1.526 | -19.266 | -0.009 | 1.00 | 0.00 |
| ATOM | 593 | N    | MET | 37 | 2.446 | -17.233 | -0.339 | 1.00 | 0.00 |
| ATOM | 594 | H    | MET | 37 | 2.975 | -16.468 | 0.055  | 1.00 | 0.00 |
| ATOM | 595 | CA   | MET | 37 | 1.959 | -17.104 | -1.709 | 1.00 | 0.00 |

|      |     |     |     |    |        |         |        |      |      |
|------|-----|-----|-----|----|--------|---------|--------|------|------|
| ATOM | 596 | HA  | MET | 37 | 0.873  | -17.188 | -1.731 | 1.00 | 0.00 |
| ATOM | 597 | CB  | MET | 37 | 2.356  | -15.736 | -2.271 | 1.00 | 0.00 |
| ATOM | 598 | HB2 | MET | 37 | 3.433  | -15.600 | -2.166 | 1.00 | 0.00 |
| ATOM | 599 | HB3 | MET | 37 | 2.085  | -15.685 | -3.325 | 1.00 | 0.00 |
| ATOM | 600 | CG  | MET | 37 | 1.624  | -14.631 | -1.502 | 1.00 | 0.00 |
| ATOM | 601 | HG2 | MET | 37 | 1.637  | -14.855 | -0.435 | 1.00 | 0.00 |
| ATOM | 602 | HG3 | MET | 37 | 2.115  | -13.674 | -1.677 | 1.00 | 0.00 |
| ATOM | 603 | SD  | MET | 37 | -0.093 | -14.533 | -2.070 | 1.00 | 0.00 |
| ATOM | 604 | CE  | MET | 37 | 0.187  | -13.404 | -3.456 | 1.00 | 0.00 |
| ATOM | 605 | HE1 | MET | 37 | 0.883  | -13.859 | -4.161 | 1.00 | 0.00 |
| ATOM | 606 | HE2 | MET | 37 | -0.759 | -13.203 | -3.958 | 1.00 | 0.00 |
| ATOM | 607 | HE3 | MET | 37 | 0.606  | -12.469 | -3.084 | 1.00 | 0.00 |
| ATOM | 608 | C   | MET | 37 | 2.523  | -18.209 | -2.602 | 1.00 | 0.00 |
| ATOM | 609 | O   | MET | 37 | 3.729  | -18.265 | -2.843 | 1.00 | 0.00 |
| ATOM | 610 | N   | PRO | 38 | 1.675  | -19.076 | -3.104 | 1.00 | 0.00 |
| ATOM | 611 | CD  | PRO | 38 | 0.218  | -19.094 | -2.876 | 1.00 | 0.00 |
| ATOM | 612 | HD2 | PRO | 38 | -0.219 | -18.192 | -3.302 | 1.00 | 0.00 |
| ATOM | 613 | HD3 | PRO | 38 | 0.027  | -19.119 | -1.803 | 1.00 | 0.00 |
| ATOM | 614 | CG  | PRO | 38 | -0.256 | -20.370 | -3.584 | 1.00 | 0.00 |
| ATOM | 615 | HG2 | PRO | 38 | -0.764 | -20.095 | -4.508 | 1.00 | 0.00 |
| ATOM | 616 | HG3 | PRO | 38 | -0.950 | -20.901 | -2.932 | 1.00 | 0.00 |
| ATOM | 617 | CB  | PRO | 38 | 0.959  | -21.196 | -3.854 | 1.00 | 0.00 |

|      |     |         |    |       |         |        |      |      |
|------|-----|---------|----|-------|---------|--------|------|------|
| ATOM | 618 | HB2 PRO | 38 | 0.808 | -21.723 | -4.796 | 1.00 | 0.00 |
| ATOM | 619 | HB3 PRO | 38 | 1.198 | -21.916 | -3.071 | 1.00 | 0.00 |
| ATOM | 620 | CA PRO  | 38 | 2.095 | -20.188 | -3.999 | 1.00 | 0.00 |
| ATOM | 621 | HA PRO  | 38 | 3.055 | -20.569 | -3.650 | 1.00 | 0.00 |
| ATOM | 622 | C PRO   | 38 | 2.229 | -19.722 | -5.446 | 1.00 | 0.00 |
| ATOM | 623 | O PRO   | 38 | 1.463 | -18.873 | -5.904 | 1.00 | 0.00 |
| ATOM | 624 | N ARG   | 39 | 3.199 | -20.282 | -6.162 | 1.00 | 0.00 |
| ATOM | 625 | H ARG   | 39 | 3.795 | -20.993 | -5.762 | 1.00 | 0.00 |
| ATOM | 626 | CA ARG  | 39 | 3.408 | -19.908 | -7.558 | 1.00 | 0.00 |
| ATOM | 627 | HA ARG  | 39 | 3.627 | -18.843 | -7.625 | 1.00 | 0.00 |
| ATOM | 628 | CB ARG  | 39 | 4.578 | -20.684 | -8.151 | 1.00 | 0.00 |
| ATOM | 629 | HB2 ARG | 39 | 4.312 | -21.739 | -8.219 | 1.00 | 0.00 |
| ATOM | 630 | HB3 ARG | 39 | 4.797 | -20.300 | -9.147 | 1.00 | 0.00 |
| ATOM | 631 | CG ARG  | 39 | 5.815 | -20.527 | -7.261 | 1.00 | 0.00 |
| ATOM | 632 | HG2 ARG | 39 | 6.036 | -19.468 | -7.130 | 1.00 | 0.00 |
| ATOM | 633 | HG3 ARG | 39 | 5.623 | -20.981 | -6.288 | 1.00 | 0.00 |
| ATOM | 634 | CD ARG  | 39 | 7.011 | -21.220 | -7.919 | 1.00 | 0.00 |
| ATOM | 635 | HD2 ARG | 39 | 6.744 | -22.242 | -8.189 | 1.00 | 0.00 |
| ATOM | 636 | HD3 ARG | 39 | 7.309 | -20.674 | -8.814 | 1.00 | 0.00 |
| ATOM | 637 | NE ARG  | 39 | 8.143 | -21.261 | -6.998 | 1.00 | 0.00 |
| ATOM | 638 | HE ARG  | 39 | 8.907 | -20.609 | -7.105 | 1.00 | 0.00 |
| ATOM | 639 | CZ ARG  | 39 | 8.199 | -22.148 | -6.004 | 1.00 | 0.00 |

|      |     |      |     |    |        |         |         |      |      |
|------|-----|------|-----|----|--------|---------|---------|------|------|
| ATOM | 640 | NH1  | ARG | 39 | 7.229  | -23.005 | -5.833  | 1.00 | 0.00 |
| ATOM | 641 | HH11 | ARG | 39 | 6.435  | -22.995 | -6.456  | 1.00 | 0.00 |
| ATOM | 642 | HH12 | ARG | 39 | 7.278  | -23.674 | -5.078  | 1.00 | 0.00 |
| ATOM | 643 | NH2  | ARG | 39 | 9.227  | -22.158 | -5.200  | 1.00 | 0.00 |
| ATOM | 644 | HH21 | ARG | 39 | 9.976  | -21.494 | -5.334  | 1.00 | 0.00 |
| ATOM | 645 | HH22 | ARG | 39 | 9.269  | -22.830 | -4.447  | 1.00 | 0.00 |
| ATOM | 646 | C    | ARG | 39 | 2.176  | -20.249 | -8.372  | 1.00 | 0.00 |
| ATOM | 647 | O    | ARG | 39 | 1.774  | -19.498 | -9.261  | 1.00 | 0.00 |
| ATOM | 648 | N    | ARG | 40 | 1.586  | -21.403 | -8.065  | 1.00 | 0.00 |
| ATOM | 649 | H    | ARG | 40 | 1.964  | -22.003 | -7.345  | 1.00 | 0.00 |
| ATOM | 650 | CA   | ARG | 40 | 0.409  | -21.849 | -8.782  | 1.00 | 0.00 |
| ATOM | 651 | HA   | ARG | 40 | 0.578  | -21.773 | -9.856  | 1.00 | 0.00 |
| ATOM | 652 | CB   | ARG | 40 | 0.098  | -23.307 | -8.439  | 1.00 | 0.00 |
| ATOM | 653 | HB2  | ARG | 40 | 0.080  | -23.430 | -7.356  | 1.00 | 0.00 |
| ATOM | 654 | HB3  | ARG | 40 | -0.873 | -23.579 | -8.851  | 1.00 | 0.00 |
| ATOM | 655 | CG   | ARG | 40 | 1.177  | -24.213 | -9.037  | 1.00 | 0.00 |
| ATOM | 656 | HG2  | ARG | 40 | 2.159  | -23.786 | -8.834  | 1.00 | 0.00 |
| ATOM | 657 | HG3  | ARG | 40 | 1.111  | -25.201 | -8.581  | 1.00 | 0.00 |
| ATOM | 658 | CD   | ARG | 40 | 0.976  | -24.335 | -10.552 | 1.00 | 0.00 |
| ATOM | 659 | HD2  | ARG | 40 | 0.990  | -23.345 | -11.007 | 1.00 | 0.00 |
| ATOM | 660 | HD3  | ARG | 40 | 1.772  | -24.943 | -10.982 | 1.00 | 0.00 |
| ATOM | 661 | NE   | ARG | 40 | -0.307 | -24.968 | -10.846 | 1.00 | 0.00 |

|      |     |      |     |    |        |         |         |      |      |
|------|-----|------|-----|----|--------|---------|---------|------|------|
| ATOM | 662 | HE   | ARG | 40 | -1.100 | -24.402 | -11.109 | 1.00 | 0.00 |
| ATOM | 663 | CZ   | ARG | 40 | -0.464 | -26.289 | -10.776 | 1.00 | 0.00 |
| ATOM | 664 | NH1  | ARG | 40 | 0.538  | -27.054 | -10.434 | 1.00 | 0.00 |
| ATOM | 665 | HH11 | ARG | 40 | 1.435  | -26.642 | -10.222 | 1.00 | 0.00 |
| ATOM | 666 | HH12 | ARG | 40 | 0.411  | -28.055 | -10.383 | 1.00 | 0.00 |
| ATOM | 667 | NH2  | ARG | 40 | -1.624 | -26.821 | -11.050 | 1.00 | 0.00 |
| ATOM | 668 | HH21 | ARG | 40 | -2.398 | -26.229 | -11.314 | 1.00 | 0.00 |
| ATOM | 669 | HH22 | ARG | 40 | -1.742 | -27.823 | -10.996 | 1.00 | 0.00 |
| ATOM | 670 | C    | ARG | 40 | -0.776 | -20.971 | -8.441  | 1.00 | 0.00 |
| ATOM | 671 | O    | ARG | 40 | -1.422 | -21.134 | -7.404  | 1.00 | 0.00 |
| ATOM | 672 | N    | GLY | 41 | -1.045 | -20.047 | -9.342  | 1.00 | 0.00 |
| ATOM | 673 | H    | GLY | 41 | -0.470 | -19.971 | -10.169 | 1.00 | 0.00 |
| ATOM | 674 | CA   | GLY | 41 | -2.161 | -19.116 | -9.185  | 1.00 | 0.00 |
| ATOM | 675 | HA2  | GLY | 41 | -2.098 | -18.355 | -9.962  | 1.00 | 0.00 |
| ATOM | 676 | HA3  | GLY | 41 | -3.096 | -19.665 | -9.290  | 1.00 | 0.00 |
| ATOM | 677 | C    | GLY | 41 | -2.135 | -18.435 | -7.819  | 1.00 | 0.00 |
| ATOM | 678 | O    | GLY | 41 | -2.791 | -18.887 | -6.879  | 1.00 | 0.00 |
| ATOM | 679 | N    | MET | 42 | -1.379 | -17.342 | -7.719  | 1.00 | 0.00 |
| ATOM | 680 | H    | MET | 42 | -0.846 | -17.017 | -8.513  | 1.00 | 0.00 |
| ATOM | 681 | CA   | MET | 42 | -1.276 | -16.598 | -6.463  | 1.00 | 0.00 |
| ATOM | 682 | HA   | MET | 42 | -0.830 | -17.226 | -5.691  | 1.00 | 0.00 |
| ATOM | 683 | CB   | MET | 42 | -0.391 | -15.363 | -6.661  | 1.00 | 0.00 |

|      |     |         |    |        |         |        |      |      |
|------|-----|---------|----|--------|---------|--------|------|------|
| ATOM | 684 | HB2 MET | 42 | -0.765 | -14.780 | -7.502 | 1.00 | 0.00 |
| ATOM | 685 | HB3 MET | 42 | -0.413 | -14.753 | -5.758 | 1.00 | 0.00 |
| ATOM | 686 | CG MET  | 42 | 1.048  | -15.801 | -6.945 | 1.00 | 0.00 |
| ATOM | 687 | HG2 MET | 42 | 1.406  | -16.440 | -6.137 | 1.00 | 0.00 |
| ATOM | 688 | HG3 MET | 42 | 1.088  | -16.350 | -7.886 | 1.00 | 0.00 |
| ATOM | 689 | SD MET  | 42 | 2.110  | -14.341 | -7.063 | 1.00 | 0.00 |
| ATOM | 690 | CE MET  | 42 | 3.637  | -15.204 | -7.510 | 1.00 | 0.00 |
| ATOM | 691 | HE1 MET | 42 | 3.489  | -15.746 | -8.444 | 1.00 | 0.00 |
| ATOM | 692 | HE2 MET | 42 | 4.442  | -14.479 | -7.635 | 1.00 | 0.00 |
| ATOM | 693 | HE3 MET | 42 | 3.902  | -15.908 | -6.720 | 1.00 | 0.00 |
| ATOM | 694 | C MET   | 42 | -2.659 | -16.164 | -5.978 | 1.00 | 0.00 |
| ATOM | 695 | O MET   | 42 | -3.652 | -16.310 | -6.692 | 1.00 | 0.00 |
| ATOM | 696 | N GLU   | 43 | -2.717 | -15.632 | -4.758 | 1.00 | 0.00 |
| ATOM | 697 | H GLU   | 43 | -1.883 | -15.545 | -4.194 | 1.00 | 0.00 |
| ATOM | 698 | CA GLU  | 43 | -3.987 | -15.187 | -4.190 | 1.00 | 0.00 |
| ATOM | 699 | HA GLU  | 43 | -4.735 | -15.974 | -4.286 | 1.00 | 0.00 |
| ATOM | 700 | CB GLU  | 43 | -3.810 | -14.859 | -2.703 | 1.00 | 0.00 |
| ATOM | 701 | HB2 GLU | 43 | -3.213 | -15.638 | -2.228 | 1.00 | 0.00 |
| ATOM | 702 | HB3 GLU | 43 | -3.302 | -13.900 | -2.600 | 1.00 | 0.00 |
| ATOM | 703 | CG GLU  | 43 | -5.183 | -14.785 | -2.027 | 1.00 | 0.00 |
| ATOM | 704 | HG2 GLU | 43 | -5.765 | -13.979 | -2.472 | 1.00 | 0.00 |
| ATOM | 705 | HG3 GLU | 43 | -5.700 | -15.733 | -2.179 | 1.00 | 0.00 |

|      |     |     |     |    |        |         |        |      |      |
|------|-----|-----|-----|----|--------|---------|--------|------|------|
| ATOM | 706 | CD  | GLU | 43 | -5.021 | -14.529 | -0.530 | 1.00 | 0.00 |
| ATOM | 707 | OE1 | GLU | 43 | -4.498 | -13.485 | -0.180 | 1.00 | 0.00 |
| ATOM | 708 | OE2 | GLU | 43 | -5.431 | -15.378 | 0.245  | 1.00 | 0.00 |
| ATOM | 709 | C   | GLU | 43 | -4.503 | -13.953 | -4.933 | 1.00 | 0.00 |
| ATOM | 710 | O   | GLU | 43 | -3.779 | -12.970 | -5.093 | 1.00 | 0.00 |
| ATOM | 711 | N   | PRO | 44 | -5.733 | -13.994 | -5.392 | 1.00 | 0.00 |
| ATOM | 712 | CD  | PRO | 44 | -6.665 | -15.124 | -5.242 | 1.00 | 0.00 |
| ATOM | 713 | HD2 | PRO | 44 | -6.657 | -15.460 | -4.205 | 1.00 | 0.00 |
| ATOM | 714 | HD3 | PRO | 44 | -6.345 | -15.941 | -5.890 | 1.00 | 0.00 |
| ATOM | 715 | CG  | PRO | 44 | -8.013 | -14.543 | -5.660 | 1.00 | 0.00 |
| ATOM | 716 | HG2 | PRO | 44 | -8.550 | -14.211 | -4.772 | 1.00 | 0.00 |
| ATOM | 717 | HG3 | PRO | 44 | -8.593 | -15.314 | -6.168 | 1.00 | 0.00 |
| ATOM | 718 | CB  | PRO | 44 | -7.721 | -13.404 | -6.578 | 1.00 | 0.00 |
| ATOM | 719 | HB2 | PRO | 44 | -8.483 | -12.635 | -6.451 | 1.00 | 0.00 |
| ATOM | 720 | HB3 | PRO | 44 | -7.683 | -13.710 | -7.623 | 1.00 | 0.00 |
| ATOM | 721 | CA  | PRO | 44 | -6.355 | -12.860 | -6.143 | 1.00 | 0.00 |
| ATOM | 722 | HA  | PRO | 44 | -5.718 | -12.635 | -6.998 | 1.00 | 0.00 |
| ATOM | 723 | C   | PRO | 44 | -6.517 | -11.607 | -5.285 | 1.00 | 0.00 |
| ATOM | 724 | O   | PRO | 44 | -6.569 | -10.493 | -5.810 | 1.00 | 0.00 |
| ATOM | 725 | N   | HIE | 45 | -6.601 | -11.794 | -3.970 | 1.00 | 0.00 |
| ATOM | 726 | H   | HIE | 45 | -6.573 | -12.725 | -3.580 | 1.00 | 0.00 |
| ATOM | 727 | CA  | HIE | 45 | -6.763 | -10.665 | -3.057 | 1.00 | 0.00 |



|      |     |     |     |    |         |         |        |      |      |
|------|-----|-----|-----|----|---------|---------|--------|------|------|
| ATOM | 728 | HA  | HIE | 45 | -7.736  | -10.200 | -3.210 | 1.00 | 0.00 |
| ATOM | 729 | CB  | HIE | 45 | -6.672  | -11.143 | -1.605 | 1.00 | 0.00 |
| ATOM | 730 | HB2 | HIE | 45 | -5.754  | -11.697 | -1.408 | 1.00 | 0.00 |
| ATOM | 731 | HB3 | HIE | 45 | -6.757  | -10.319 | -0.897 | 1.00 | 0.00 |
| ATOM | 732 | CG  | HIE | 45 | -7.812  | -12.081 | -1.313 | 1.00 | 0.00 |
| ATOM | 733 | ND1 | HIE | 45 | -7.606  | -13.391 | -0.911 | 1.00 | 0.00 |
| ATOM | 734 | CE1 | HIE | 45 | -8.814  | -13.957 | -0.738 | 1.00 | 0.00 |
| ATOM | 735 | HE1 | HIE | 45 | -8.836  | -14.999 | -0.419 | 1.00 | 0.00 |
| ATOM | 736 | NE2 | HIE | 45 | -9.804  | -13.100 | -1.000 | 1.00 | 0.00 |
| ATOM | 737 | HE2 | HIE | 45 | -10.804 | -13.236 | -0.958 | 1.00 | 0.00 |
| ATOM | 738 | CD2 | HIE | 45 | -9.174  | -11.915 | -1.363 | 1.00 | 0.00 |
| ATOM | 739 | HD2 | HIE | 45 | -9.768  | -11.042 | -1.630 | 1.00 | 0.00 |
| ATOM | 740 | C   | HIE | 45 | -5.691  | -9.609  | -3.316 | 1.00 | 0.00 |
| ATOM | 741 | O   | HIE | 45 | -5.989  | -8.415  | -3.387 | 1.00 | 0.00 |
| ATOM | 742 | N   | MET | 46 | -4.447  | -10.058 | -3.467 | 1.00 | 0.00 |
| ATOM | 743 | H   | MET | 46 | -4.244  | -11.045 | -3.399 | 1.00 | 0.00 |
| ATOM | 744 | CA  | MET | 46 | -3.342  | -9.141  | -3.729 | 1.00 | 0.00 |
| ATOM | 745 | HA  | MET | 46 | -3.313  | -8.364  | -2.965 | 1.00 | 0.00 |
| ATOM | 746 | CB  | MET | 46 | -2.011  | -9.901  | -3.704 | 1.00 | 0.00 |
| ATOM | 747 | HB2 | MET | 46 | -1.984  | -10.601 | -4.539 | 1.00 | 0.00 |
| ATOM | 748 | HB3 | MET | 46 | -1.191  | -9.189  | -3.800 | 1.00 | 0.00 |
| ATOM | 749 | CG  | MET | 46 | -1.865  | -10.671 | -2.389 | 1.00 | 0.00 |

|      |     |         |    |        |         |        |      |      |
|------|-----|---------|----|--------|---------|--------|------|------|
| ATOM | 750 | HG2 MET | 46 | -2.583 | -11.491 | -2.364 | 1.00 | 0.00 |
| ATOM | 751 | HG3 MET | 46 | -0.854 | -11.072 | -2.311 | 1.00 | 0.00 |
| ATOM | 752 | SD MET  | 46 | -2.175 | -9.566  | -0.990 | 1.00 | 0.00 |
| ATOM | 753 | CE MET  | 46 | -2.781 | -10.830 | 0.156  | 1.00 | 0.00 |
| ATOM | 754 | HE1 MET | 46 | -2.004 | -11.579 | 0.316  | 1.00 | 0.00 |
| ATOM | 755 | HE2 MET | 46 | -3.038 | -10.365 | 1.108  | 1.00 | 0.00 |
| ATOM | 756 | HE3 MET | 46 | -3.665 | -11.309 | -0.265 | 1.00 | 0.00 |
| ATOM | 757 | C MET   | 46 | -3.518 | -8.488  | -5.099 | 1.00 | 0.00 |
| ATOM | 758 | O MET   | 46 | -3.303 | -7.287  | -5.263 | 1.00 | 0.00 |
| ATOM | 759 | N SER   | 47 | -3.911 | -9.304  | -6.075 | 1.00 | 0.00 |
| ATOM | 760 | H SER   | 47 | -4.050 | -10.286 | -5.880 | 1.00 | 0.00 |
| ATOM | 761 | CA SER  | 47 | -4.119 | -8.833  | -7.442 | 1.00 | 0.00 |
| ATOM | 762 | HA SER  | 47 | -3.191 | -8.425  | -7.843 | 1.00 | 0.00 |
| ATOM | 763 | CB SER  | 47 | -4.565 | -9.997  | -8.329 | 1.00 | 0.00 |
| ATOM | 764 | HB2 SER | 47 | -5.557 | -10.329 | -8.024 | 1.00 | 0.00 |
| ATOM | 765 | HB3 SER | 47 | -4.594 | -9.673  | -9.369 | 1.00 | 0.00 |
| ATOM | 766 | OG SER  | 47 | -3.644 | -11.071 | -8.194 | 1.00 | 0.00 |
| ATOM | 767 | HG SER  | 47 | -3.922 | -11.803 | -8.750 | 1.00 | 0.00 |
| ATOM | 768 | C SER   | 47 | -5.163 | -7.720  | -7.501 | 1.00 | 0.00 |
| ATOM | 769 | O SER   | 47 | -5.080 | -6.827  | -8.344 | 1.00 | 0.00 |
| ATOM | 770 | N GLU   | 48 | -6.154 | -7.789  | -6.616 | 1.00 | 0.00 |
| ATOM | 771 | H GLU   | 48 | -6.202 | -8.551  | -5.954 | 1.00 | 0.00 |

|      |     |     |     |    |         |        |        |      |      |
|------|-----|-----|-----|----|---------|--------|--------|------|------|
| ATOM | 772 | CA  | GLU | 48 | -7.216  | -6.786 | -6.597 | 1.00 | 0.00 |
| ATOM | 773 | HA  | GLU | 48 | -7.780  | -6.821 | -7.528 | 1.00 | 0.00 |
| ATOM | 774 | CB  | GLU | 48 | -8.176  | -7.062 | -5.431 | 1.00 | 0.00 |
| ATOM | 775 | HB2 | GLU | 48 | -8.000  | -8.069 | -5.051 | 1.00 | 0.00 |
| ATOM | 776 | HB3 | GLU | 48 | -7.995  | -6.338 | -4.637 | 1.00 | 0.00 |
| ATOM | 777 | CG  | GLU | 48 | -9.629  | -6.943 | -5.910 | 1.00 | 0.00 |
| ATOM | 778 | HG2 | GLU | 48 | -9.677  | -7.199 | -6.968 | 1.00 | 0.00 |
| ATOM | 779 | HG3 | GLU | 48 | -10.243 | -7.640 | -5.340 | 1.00 | 0.00 |
| ATOM | 780 | CD  | GLU | 48 | -10.150 | -5.521 | -5.706 | 1.00 | 0.00 |
| ATOM | 781 | OE1 | GLU | 48 | -9.402  | -4.589 | -5.952 | 1.00 | 0.00 |
| ATOM | 782 | OE2 | GLU | 48 | -11.296 | -5.384 | -5.309 | 1.00 | 0.00 |
| ATOM | 783 | C   | GLU | 48 | -6.628  | -5.382 | -6.463 | 1.00 | 0.00 |
| ATOM | 784 | O   | GLU | 48 | -6.917  | -4.501 | -7.274 | 1.00 | 0.00 |
| ATOM | 785 | N   | CYX | 49 | -5.795  | -5.184 | -5.445 | 1.00 | 0.00 |
| ATOM | 786 | H   | CYX | 49 | -5.605  | -5.924 | -4.784 | 1.00 | 0.00 |
| ATOM | 787 | CA  | CYX | 49 | -5.166  | -3.884 | -5.228 | 1.00 | 0.00 |
| ATOM | 788 | HA  | CYX | 49 | -5.920  | -3.098 | -5.248 | 1.00 | 0.00 |
| ATOM | 789 | CB  | CYX | 49 | -4.463  | -3.856 | -3.860 | 1.00 | 0.00 |
| ATOM | 790 | HB2 | CYX | 49 | -4.257  | -4.876 | -3.535 | 1.00 | 0.00 |
| ATOM | 791 | HB3 | CYX | 49 | -3.525  | -3.307 | -3.944 | 1.00 | 0.00 |
| ATOM | 792 | SG  | CYX | 49 | -5.531  | -3.029 | -2.653 | 1.00 | 0.00 |
| ATOM | 793 | C   | CYX | 49 | -4.160  | -3.576 | -6.339 | 1.00 | 0.00 |

|      |     |     |     |    |        |        |         |      |      |
|------|-----|-----|-----|----|--------|--------|---------|------|------|
| ATOM | 794 | O   | CYX | 49 | -3.959 | -2.416 | -6.692  | 1.00 | 0.00 |
| ATOM | 795 | N   | CYX | 50 | -3.531 | -4.624 | -6.877  | 1.00 | 0.00 |
| ATOM | 796 | H   | CYX | 50 | -3.727 | -5.556 | -6.538  | 1.00 | 0.00 |
| ATOM | 797 | CA  | CYX | 50 | -2.532 | -4.466 | -7.940  | 1.00 | 0.00 |
| ATOM | 798 | HA  | CYX | 50 | -1.644 | -3.970 | -7.547  | 1.00 | 0.00 |
| ATOM | 799 | CB  | CYX | 50 | -2.125 | -5.834 | -8.486  | 1.00 | 0.00 |
| ATOM | 800 | HB2 | CYX | 50 | -1.853 | -6.490 | -7.659  | 1.00 | 0.00 |
| ATOM | 801 | HB3 | CYX | 50 | -2.959 | -6.270 | -9.035  | 1.00 | 0.00 |
| ATOM | 802 | SG  | CYX | 50 | -0.733 | -5.639 | -9.631  | 1.00 | 0.00 |
| ATOM | 803 | C   | CYX | 50 | -3.045 | -3.613 | -9.097  | 1.00 | 0.00 |
| ATOM | 804 | O   | CYX | 50 | -2.323 | -2.760 | -9.614  | 1.00 | 0.00 |
| ATOM | 805 | N   | GLU | 51 | -4.281 | -3.862 | -9.517  | 1.00 | 0.00 |
| ATOM | 806 | H   | GLU | 51 | -4.834 | -4.591 | -9.089  | 1.00 | 0.00 |
| ATOM | 807 | CA  | GLU | 51 | -4.858 | -3.121 | -10.634 | 1.00 | 0.00 |
| ATOM | 808 | HA  | GLU | 51 | -4.259 | -3.272 | -11.532 | 1.00 | 0.00 |
| ATOM | 809 | CB  | GLU | 51 | -6.284 | -3.613 | -10.907 | 1.00 | 0.00 |
| ATOM | 810 | HB2 | GLU | 51 | -6.277 | -4.697 | -11.025 | 1.00 | 0.00 |
| ATOM | 811 | HB3 | GLU | 51 | -6.926 | -3.344 | -10.068 | 1.00 | 0.00 |
| ATOM | 812 | CG  | GLU | 51 | -6.818 | -2.962 | -12.190 | 1.00 | 0.00 |
| ATOM | 813 | HG2 | GLU | 51 | -7.865 | -3.236 | -12.320 | 1.00 | 0.00 |
| ATOM | 814 | HG3 | GLU | 51 | -6.735 | -1.880 | -12.094 | 1.00 | 0.00 |
| ATOM | 815 | CD  | GLU | 51 | -6.013 | -3.430 | -13.406 | 1.00 | 0.00 |

|      |     |      |     |    |        |        |         |      |      |
|------|-----|------|-----|----|--------|--------|---------|------|------|
| ATOM | 816 | OE1  | GLU | 51 | -5.522 | -4.548 | -13.384 | 1.00 | 0.00 |
| ATOM | 817 | OE2  | GLU | 51 | -5.903 | -2.661 | -14.346 | 1.00 | 0.00 |
| ATOM | 818 | C    | GLU | 51 | -4.875 | -1.617 | -10.361 | 1.00 | 0.00 |
| ATOM | 819 | O    | GLU | 51 | -4.657 | -0.816 | -11.268 | 1.00 | 0.00 |
| ATOM | 820 | N    | GLN | 52 | -5.146 | -1.240 | -9.114  | 1.00 | 0.00 |
| ATOM | 821 | H    | GLN | 52 | -5.351 | -1.928 | -8.403  | 1.00 | 0.00 |
| ATOM | 822 | CA   | GLN | 52 | -5.201 | 0.174  | -8.746  | 1.00 | 0.00 |
| ATOM | 823 | HA   | GLN | 52 | -5.958 | 0.689  | -9.336  | 1.00 | 0.00 |
| ATOM | 824 | CB   | GLN | 52 | -5.564 | 0.301  | -7.269  | 1.00 | 0.00 |
| ATOM | 825 | HB2  | GLN | 52 | -4.806 | -0.194 | -6.661  | 1.00 | 0.00 |
| ATOM | 826 | HB3  | GLN | 52 | -5.619 | 1.354  | -6.994  | 1.00 | 0.00 |
| ATOM | 827 | CG   | GLN | 52 | -6.924 | -0.361 | -7.027  | 1.00 | 0.00 |
| ATOM | 828 | HG2  | GLN | 52 | -7.055 | -1.201 | -7.709  | 1.00 | 0.00 |
| ATOM | 829 | HG3  | GLN | 52 | -6.985 | -0.716 | -5.998  | 1.00 | 0.00 |
| ATOM | 830 | CD   | GLN | 52 | -8.050 | 0.641  | -7.265  | 1.00 | 0.00 |
| ATOM | 831 | OE1  | GLN | 52 | -8.153 | 1.217  | -8.347  | 1.00 | 0.00 |
| ATOM | 832 | NE2  | GLN | 52 | -8.907 | 0.883  | -6.310  | 1.00 | 0.00 |
| ATOM | 833 | HE21 | GLN | 52 | -9.654 | 1.545  | -6.462  | 1.00 | 0.00 |
| ATOM | 834 | HE22 | GLN | 52 | -8.818 | 0.406  | -5.423  | 1.00 | 0.00 |
| ATOM | 835 | C    | GLN | 52 | -3.872 | 0.877  | -9.024  | 1.00 | 0.00 |
| ATOM | 836 | O    | GLN | 52 | -3.838 | 1.890  | -9.722  | 1.00 | 0.00 |
| ATOM | 837 | N    | LEU | 53 | -2.776 | 0.327  | -8.493  | 1.00 | 0.00 |

|      |     |      |     |    |        |        |         |      |      |
|------|-----|------|-----|----|--------|--------|---------|------|------|
| ATOM | 838 | H    | LEU | 53 | -2.833 | -0.529 | -7.959  | 1.00 | 0.00 |
| ATOM | 839 | CA   | LEU | 53 | -1.453 | 0.917  | -8.722  | 1.00 | 0.00 |
| ATOM | 840 | HA   | LEU | 53 | -1.424 | 1.922  | -8.301  | 1.00 | 0.00 |
| ATOM | 841 | CB   | LEU | 53 | -0.353 | 0.077  | -8.059  | 1.00 | 0.00 |
| ATOM | 842 | HB2  | LEU | 53 | -0.187 | -0.802 | -8.682  | 1.00 | 0.00 |
| ATOM | 843 | HB3  | LEU | 53 | 0.562  | 0.668  | -8.016  | 1.00 | 0.00 |
| ATOM | 844 | CG   | LEU | 53 | -0.742 | -0.367 | -6.642  | 1.00 | 0.00 |
| ATOM | 845 | HG   | LEU | 53 | 0.155  | -0.362 | -6.021  | 1.00 | 0.00 |
| ATOM | 846 | CD1  | LEU | 53 | -1.797 | 0.565  | -6.025  | 1.00 | 0.00 |
| ATOM | 847 | HD11 | LEU | 53 | -2.694 | 0.560  | -6.644  | 1.00 | 0.00 |
| ATOM | 848 | HD12 | LEU | 53 | -2.046 | 0.218  | -5.022  | 1.00 | 0.00 |
| ATOM | 849 | HD13 | LEU | 53 | -1.399 | 1.578  | -5.970  | 1.00 | 0.00 |
| ATOM | 850 | CD2  | LEU | 53 | -1.297 | -1.788 | -6.729  | 1.00 | 0.00 |
| ATOM | 851 | HD21 | LEU | 53 | -0.534 | -2.453 | -7.135  | 1.00 | 0.00 |
| ATOM | 852 | HD22 | LEU | 53 | -1.582 | -2.129 | -5.733  | 1.00 | 0.00 |
| ATOM | 853 | HD23 | LEU | 53 | -2.171 | -1.798 | -7.380  | 1.00 | 0.00 |
| ATOM | 854 | C    | LEU | 53 | -1.183 | 0.909  | -10.208 | 1.00 | 0.00 |
| ATOM | 855 | O    | LEU | 53 | -0.808 | 1.912  | -10.815 | 1.00 | 0.00 |
| ATOM | 856 | N    | GLU | 54 | -1.402 | -0.266 | -10.762 | 1.00 | 0.00 |
| ATOM | 857 | H    | GLU | 54 | -1.667 | -1.037 | -10.165 | 1.00 | 0.00 |
| ATOM | 858 | CA   | GLU | 54 | -1.228 | -0.521 | -12.170 | 1.00 | 0.00 |
| ATOM | 859 | HA   | GLU | 54 | -0.185 | -0.417 | -12.470 | 1.00 | 0.00 |

|      |     |     |     |    |        |        |         |      |      |
|------|-----|-----|-----|----|--------|--------|---------|------|------|
| ATOM | 860 | CB  | GLU | 54 | -1.664 | -1.962 | -12.415 | 1.00 | 0.00 |
| ATOM | 861 | HB2 | GLU | 54 | -0.956 | -2.632 | -11.926 | 1.00 | 0.00 |
| ATOM | 862 | HB3 | GLU | 54 | -2.656 | -2.108 | -11.987 | 1.00 | 0.00 |
| ATOM | 863 | CG  | GLU | 54 | -1.705 | -2.269 | -13.918 | 1.00 | 0.00 |
| ATOM | 864 | HG2 | GLU | 54 | -2.338 | -1.532 | -14.412 | 1.00 | 0.00 |
| ATOM | 865 | HG3 | GLU | 54 | -0.694 | -2.207 | -14.321 | 1.00 | 0.00 |
| ATOM | 866 | CD  | GLU | 54 | -2.267 | -3.672 | -14.165 | 1.00 | 0.00 |
| ATOM | 867 | OE1 | GLU | 54 | -2.584 | -4.352 | -13.201 | 1.00 | 0.00 |
| ATOM | 868 | OE2 | GLU | 54 | -2.371 | -4.047 | -15.322 | 1.00 | 0.00 |
| ATOM | 869 | C   | GLU | 54 | -2.027 | 0.478  | -13.008 | 1.00 | 0.00 |
| ATOM | 870 | O   | GLU | 54 | -1.607 | 0.860  | -14.101 | 1.00 | 0.00 |
| ATOM | 871 | N   | GLY | 55 | -3.166 | 0.913  | -12.474 | 1.00 | 0.00 |
| ATOM | 872 | H   | GLY | 55 | -3.468 | 0.571  | -11.573 | 1.00 | 0.00 |
| ATOM | 873 | CA  | GLY | 55 | -4.009 | 1.888  | -13.164 | 1.00 | 0.00 |
| ATOM | 874 | HA2 | GLY | 55 | -3.916 | 1.750  | -14.241 | 1.00 | 0.00 |
| ATOM | 875 | HA3 | GLY | 55 | -5.048 | 1.744  | -12.867 | 1.00 | 0.00 |
| ATOM | 876 | C   | GLY | 55 | -3.582 | 3.311  | -12.806 | 1.00 | 0.00 |
| ATOM | 877 | O   | GLY | 55 | -3.979 | 4.275  | -13.461 | 1.00 | 0.00 |
| ATOM | 878 | N   | MET | 56 | -2.766 | 3.425  | -11.760 | 1.00 | 0.00 |
| ATOM | 879 | H   | MET | 56 | -2.485 | 2.598  | -11.252 | 1.00 | 0.00 |
| ATOM | 880 | CA  | MET | 56 | -2.271 | 4.722  | -11.302 | 1.00 | 0.00 |
| ATOM | 881 | HA  | MET | 56 | -3.025 | 5.492  | -11.462 | 1.00 | 0.00 |

|      |     |     |     |    |        |       |         |      |      |
|------|-----|-----|-----|----|--------|-------|---------|------|------|
| ATOM | 882 | CB  | MET | 56 | -1.954 | 4.650 | -9.801  | 1.00 | 0.00 |
| ATOM | 883 | HB2 | MET | 56 | -2.870 | 4.432 | -9.251  | 1.00 | 0.00 |
| ATOM | 884 | HB3 | MET | 56 | -1.228 | 3.856 | -9.626  | 1.00 | 0.00 |
| ATOM | 885 | CG  | MET | 56 | -1.376 | 5.984 | -9.321  | 1.00 | 0.00 |
| ATOM | 886 | HG2 | MET | 56 | -0.995 | 5.875 | -8.305  | 1.00 | 0.00 |
| ATOM | 887 | HG3 | MET | 56 | -0.565 | 6.292 | -9.981  | 1.00 | 0.00 |
| ATOM | 888 | SD  | MET | 56 | -2.670 | 7.247 | -9.338  | 1.00 | 0.00 |
| ATOM | 889 | CE  | MET | 56 | -2.658 | 7.610 | -7.567  | 1.00 | 0.00 |
| ATOM | 890 | HE1 | MET | 56 | -1.669 | 7.963 | -7.274  | 1.00 | 0.00 |
| ATOM | 891 | HE2 | MET | 56 | -3.397 | 8.380 | -7.348  | 1.00 | 0.00 |
| ATOM | 892 | HE3 | MET | 56 | -2.900 | 6.705 | -7.008  | 1.00 | 0.00 |
| ATOM | 893 | C   | MET | 56 | -1.016 | 5.117 | -12.073 | 1.00 | 0.00 |
| ATOM | 894 | O   | MET | 56 | -0.173 | 4.269 | -12.375 | 1.00 | 0.00 |
| ATOM | 895 | N   | ASP | 57 | -0.892 | 6.409 | -12.386 | 1.00 | 0.00 |
| ATOM | 896 | H   | ASP | 57 | -1.615 | 7.070 | -12.139 | 1.00 | 0.00 |
| ATOM | 897 | CA  | ASP | 57 | 0.275  | 6.899 | -13.116 | 1.00 | 0.00 |
| ATOM | 898 | HA  | ASP | 57 | 0.282  | 6.488 | -14.126 | 1.00 | 0.00 |
| ATOM | 899 | CB  | ASP | 57 | 0.235  | 8.429 | -13.209 | 1.00 | 0.00 |
| ATOM | 900 | HB2 | ASP | 57 | 0.163  | 8.841 | -12.202 | 1.00 | 0.00 |
| ATOM | 901 | HB3 | ASP | 57 | 1.154  | 8.779 | -13.679 | 1.00 | 0.00 |
| ATOM | 902 | CG  | ASP | 57 | -0.968 | 8.888 | -14.036 | 1.00 | 0.00 |
| ATOM | 903 | OD1 | ASP | 57 | -1.533 | 8.071 | -14.747 | 1.00 | 0.00 |



|      |     |     |     |    |        |        |         |      |      |
|------|-----|-----|-----|----|--------|--------|---------|------|------|
| ATOM | 904 | OD2 | ASP | 57 | -1.307 | 10.057 | -13.946 | 1.00 | 0.00 |
| ATOM | 905 | C   | ASP | 57 | 1.558  | 6.457  | -12.416 | 1.00 | 0.00 |
| ATOM | 906 | O   | ASP | 57 | 1.605  | 6.373  | -11.189 | 1.00 | 0.00 |
| ATOM | 907 | N   | GLU | 58 | 2.590  | 6.163  | -13.202 | 1.00 | 0.00 |
| ATOM | 908 | H   | GLU | 58 | 2.505  | 6.227  | -14.206 | 1.00 | 0.00 |
| ATOM | 909 | CA  | GLU | 58 | 3.861  | 5.712  | -12.643 | 1.00 | 0.00 |
| ATOM | 910 | HA  | GLU | 58 | 3.736  | 4.745  | -12.156 | 1.00 | 0.00 |
| ATOM | 911 | CB  | GLU | 58 | 4.894  | 5.566  | -13.762 | 1.00 | 0.00 |
| ATOM | 912 | HB2 | GLU | 58 | 4.620  | 4.732  | -14.408 | 1.00 | 0.00 |
| ATOM | 913 | HB3 | GLU | 58 | 4.931  | 6.483  | -14.349 | 1.00 | 0.00 |
| ATOM | 914 | CG  | GLU | 58 | 6.266  | 5.301  | -13.145 | 1.00 | 0.00 |
| ATOM | 915 | HG2 | GLU | 58 | 6.532  | 6.136  | -12.497 | 1.00 | 0.00 |
| ATOM | 916 | HG3 | GLU | 58 | 6.225  | 4.384  | -12.556 | 1.00 | 0.00 |
| ATOM | 917 | CD  | GLU | 58 | 7.317  | 5.154  | -14.242 | 1.00 | 0.00 |
| ATOM | 918 | OE1 | GLU | 58 | 7.322  | 4.124  | -14.898 | 1.00 | 0.00 |
| ATOM | 919 | OE2 | GLU | 58 | 8.104  | 6.072  | -14.409 | 1.00 | 0.00 |
| ATOM | 920 | C   | GLU | 58 | 4.396  | 6.679  | -11.590 | 1.00 | 0.00 |
| ATOM | 921 | O   | GLU | 58 | 4.638  | 6.289  | -10.448 | 1.00 | 0.00 |
| ATOM | 922 | N   | SER | 59 | 4.583  | 7.936  | -11.978 | 1.00 | 0.00 |
| ATOM | 923 | H   | SER | 59 | 4.390  | 8.214  | -12.929 | 1.00 | 0.00 |
| ATOM | 924 | CA  | SER | 59 | 5.092  | 8.943  | -11.052 | 1.00 | 0.00 |
| ATOM | 925 | HA  | SER | 59 | 6.097  | 8.676  | -10.722 | 1.00 | 0.00 |

|      |     |     |     |    |        |        |         |      |      |
|------|-----|-----|-----|----|--------|--------|---------|------|------|
| ATOM | 926 | CB  | SER | 59 | 5.151  | 10.304 | -11.748 | 1.00 | 0.00 |
| ATOM | 927 | HB2 | SER | 59 | 4.145  | 10.616 | -12.027 | 1.00 | 0.00 |
| ATOM | 928 | HB3 | SER | 59 | 5.586  | 11.041 | -11.073 | 1.00 | 0.00 |
| ATOM | 929 | OG  | SER | 59 | 5.955  | 10.199 | -12.916 | 1.00 | 0.00 |
| ATOM | 930 | HG  | SER | 59 | 5.994  | 11.051 | -13.355 | 1.00 | 0.00 |
| ATOM | 931 | C   | SER | 59 | 4.195  | 9.032  | -9.824  | 1.00 | 0.00 |
| ATOM | 932 | O   | SER | 59 | 4.661  | 9.269  | -8.709  | 1.00 | 0.00 |
| ATOM | 933 | N   | CYX | 60 | 2.904  | 8.835  | -10.052 | 1.00 | 0.00 |
| ATOM | 934 | H   | CYX | 60 | 2.582  | 8.667  | -10.994 | 1.00 | 0.00 |
| ATOM | 935 | CA  | CYX | 60 | 1.913  | 8.887  | -8.979  | 1.00 | 0.00 |
| ATOM | 936 | HA  | CYX | 60 | 2.109  | 9.740  | -8.330  | 1.00 | 0.00 |
| ATOM | 937 | CB  | CYX | 60 | 0.510  | 9.034  | -9.571  | 1.00 | 0.00 |
| ATOM | 938 | HB2 | CYX | 60 | 0.287  | 8.169  | -10.195 | 1.00 | 0.00 |
| ATOM | 939 | HB3 | CYX | 60 | -0.220 | 9.097  | -8.764  | 1.00 | 0.00 |
| ATOM | 940 | SG  | CYX | 60 | 0.431  | 10.546 | -10.562 | 1.00 | 0.00 |
| ATOM | 941 | C   | CYX | 60 | 1.976  | 7.634  | -8.113  | 1.00 | 0.00 |
| ATOM | 942 | O   | CYX | 60 | 1.570  | 7.649  | -6.950  | 1.00 | 0.00 |
| ATOM | 943 | N   | ARG | 61 | 2.463  | 6.545  | -8.700  | 1.00 | 0.00 |
| ATOM | 944 | H   | ARG | 61 | 2.769  | 6.582  | -9.662  | 1.00 | 0.00 |
| ATOM | 945 | CA  | ARG | 61 | 2.552  | 5.272  | -7.995  | 1.00 | 0.00 |
| ATOM | 946 | HA  | ARG | 61 | 1.567  | 4.959  | -7.649  | 1.00 | 0.00 |
| ATOM | 947 | CB  | ARG | 61 | 3.098  | 4.204  | -8.947  | 1.00 | 0.00 |

|      |     |          |    |       |        |         |      |      |
|------|-----|----------|----|-------|--------|---------|------|------|
| ATOM | 948 | HB2 ARG  | 61 | 2.546 | 4.246  | -9.885  | 1.00 | 0.00 |
| ATOM | 949 | HB3 ARG  | 61 | 4.153 | 4.401  | -9.137  | 1.00 | 0.00 |
| ATOM | 950 | CG ARG   | 61 | 2.943 | 2.812  | -8.326  | 1.00 | 0.00 |
| ATOM | 951 | HG2 ARG  | 61 | 3.414 | 2.794  | -7.343  | 1.00 | 0.00 |
| ATOM | 952 | HG3 ARG  | 61 | 1.885 | 2.571  | -8.226  | 1.00 | 0.00 |
| ATOM | 953 | CD ARG   | 61 | 3.617 | 1.780  | -9.232  | 1.00 | 0.00 |
| ATOM | 954 | HD2 ARG  | 61 | 4.697 | 1.931  | -9.231  | 1.00 | 0.00 |
| ATOM | 955 | HD3 ARG  | 61 | 3.392 | 0.772  | -8.882  | 1.00 | 0.00 |
| ATOM | 956 | NE ARG   | 61 | 3.126 | 1.921  | -10.601 | 1.00 | 0.00 |
| ATOM | 957 | HE ARG   | 61 | 3.523 | 2.629  | -11.202 | 1.00 | 0.00 |
| ATOM | 958 | CZ ARG   | 61 | 2.159 | 1.145  | -11.086 | 1.00 | 0.00 |
| ATOM | 959 | NH1 ARG  | 61 | 1.644 | 0.192  | -10.355 | 1.00 | 0.00 |
| ATOM | 960 | HH11 ARG | 61 | 1.982 | 0.042  | -9.415  | 1.00 | 0.00 |
| ATOM | 961 | HH12 ARG | 61 | 0.911 | -0.391 | -10.733 | 1.00 | 0.00 |
| ATOM | 962 | NH2 ARG  | 61 | 1.729 | 1.335  | -12.302 | 1.00 | 0.00 |
| ATOM | 963 | HH21 ARG | 61 | 2.132 | 2.068  | -12.868 | 1.00 | 0.00 |
| ATOM | 964 | HH22 ARG | 61 | 0.996 | 0.748  | -12.672 | 1.00 | 0.00 |
| ATOM | 965 | C ARG    | 61 | 3.463 | 5.382  | -6.775  | 1.00 | 0.00 |
| ATOM | 966 | O ARG    | 61 | 3.170 | 4.810  | -5.724  | 1.00 | 0.00 |
| ATOM | 967 | N CYX    | 62 | 4.563 | 6.120  | -6.915  | 1.00 | 0.00 |
| ATOM | 968 | H CYX    | 62 | 4.779 | 6.566  | -7.795  | 1.00 | 0.00 |
| ATOM | 969 | CA CYX   | 62 | 5.497 | 6.290  | -5.806  | 1.00 | 0.00 |

|      |     |     |     |    |       |        |        |      |      |
|------|-----|-----|-----|----|-------|--------|--------|------|------|
| ATOM | 970 | HA  | CYX | 62 | 5.918 | 5.325  | -5.521 | 1.00 | 0.00 |
| ATOM | 971 | CB  | CYX | 62 | 6.643 | 7.221  | -6.222 | 1.00 | 0.00 |
| ATOM | 972 | HB2 | CYX | 62 | 6.317 | 8.258  | -6.141 | 1.00 | 0.00 |
| ATOM | 973 | HB3 | CYX | 62 | 7.500 | 7.058  | -5.568 | 1.00 | 0.00 |
| ATOM | 974 | SG  | CYX | 62 | 7.106 | 6.895  | -7.942 | 1.00 | 0.00 |
| ATOM | 975 | C   | CYX | 62 | 4.772 | 6.880  | -4.598 | 1.00 | 0.00 |
| ATOM | 976 | O   | CYX | 62 | 4.730 | 6.277  | -3.525 | 1.00 | 0.00 |
| ATOM | 977 | N   | GLU | 63 | 4.192 | 8.062  | -4.796 | 1.00 | 0.00 |
| ATOM | 978 | H   | GLU | 63 | 4.267 | 8.513  | -5.696 | 1.00 | 0.00 |
| ATOM | 979 | CA  | GLU | 63 | 3.451 | 8.744  | -3.740 | 1.00 | 0.00 |
| ATOM | 980 | HA  | GLU | 63 | 4.106 | 8.953  | -2.893 | 1.00 | 0.00 |
| ATOM | 981 | CB  | GLU | 63 | 2.903 | 10.070 | -4.275 | 1.00 | 0.00 |
| ATOM | 982 | HB2 | GLU | 63 | 3.711 | 10.627 | -4.750 | 1.00 | 0.00 |
| ATOM | 983 | HB3 | GLU | 63 | 2.122 | 9.867  | -5.007 | 1.00 | 0.00 |
| ATOM | 984 | CG  | GLU | 63 | 2.319 | 10.899 | -3.121 | 1.00 | 0.00 |
| ATOM | 985 | HG2 | GLU | 63 | 1.598 | 10.289 | -2.576 | 1.00 | 0.00 |
| ATOM | 986 | HG3 | GLU | 63 | 3.129 | 11.189 | -2.451 | 1.00 | 0.00 |
| ATOM | 987 | CD  | GLU | 63 | 1.625 | 12.154 | -3.655 | 1.00 | 0.00 |
| ATOM | 988 | OE1 | GLU | 63 | 1.529 | 12.297 | -4.865 | 1.00 | 0.00 |
| ATOM | 989 | OE2 | GLU | 63 | 1.196 | 12.957 | -2.842 | 1.00 | 0.00 |
| ATOM | 990 | C   | GLU | 63 | 2.289 | 7.885  | -3.246 | 1.00 | 0.00 |
| ATOM | 991 | O   | GLU | 63 | 1.959 | 7.888  | -2.060 | 1.00 | 0.00 |

|      |      |      |     |    |        |       |        |      |      |
|------|------|------|-----|----|--------|-------|--------|------|------|
| ATOM | 992  | N    | GLY | 64 | 1.656  | 7.174 | -4.180 | 1.00 | 0.00 |
| ATOM | 993  | H    | GLY | 64 | 1.970  | 7.208 | -5.139 | 1.00 | 0.00 |
| ATOM | 994  | CA   | GLY | 64 | 0.505  | 6.334 | -3.857 | 1.00 | 0.00 |
| ATOM | 995  | HA2  | GLY | 64 | -0.327 | 6.979 | -3.577 | 1.00 | 0.00 |
| ATOM | 996  | HA3  | GLY | 64 | 0.237  | 5.758 | -4.742 | 1.00 | 0.00 |
| ATOM | 997  | C    | GLY | 64 | 0.795  | 5.373 | -2.710 | 1.00 | 0.00 |
| ATOM | 998  | O    | GLY | 64 | 0.108  | 5.397 | -1.689 | 1.00 | 0.00 |
| ATOM | 999  | N    | LEU | 65 | 1.802  | 4.523 | -2.884 | 1.00 | 0.00 |
| ATOM | 1000 | H    | LEU | 65 | 2.324  | 4.511 | -3.748 | 1.00 | 0.00 |
| ATOM | 1001 | CA   | LEU | 65 | 2.152  | 3.553 | -1.851 | 1.00 | 0.00 |
| ATOM | 1002 | HA   | LEU | 65 | 1.316  | 2.875 | -1.678 | 1.00 | 0.00 |
| ATOM | 1003 | CB   | LEU | 65 | 3.367  | 2.729 | -2.290 | 1.00 | 0.00 |
| ATOM | 1004 | HB2  | LEU | 65 | 4.197  | 3.399 | -2.513 | 1.00 | 0.00 |
| ATOM | 1005 | HB3  | LEU | 65 | 3.655  | 2.050 | -1.487 | 1.00 | 0.00 |
| ATOM | 1006 | CG   | LEU | 65 | 3.014  | 1.918 | -3.542 | 1.00 | 0.00 |
| ATOM | 1007 | HG   | LEU | 65 | 2.785  | 2.598 | -4.362 | 1.00 | 0.00 |
| ATOM | 1008 | CD1  | LEU | 65 | 4.201  | 1.033 | -3.930 | 1.00 | 0.00 |
| ATOM | 1009 | HD11 | LEU | 65 | 4.431  | 0.352 | -3.110 | 1.00 | 0.00 |
| ATOM | 1010 | HD12 | LEU | 65 | 3.950  | 0.456 | -4.820 | 1.00 | 0.00 |
| ATOM | 1011 | HD13 | LEU | 65 | 5.070  | 1.658 | -4.136 | 1.00 | 0.00 |
| ATOM | 1012 | CD2  | LEU | 65 | 1.791  | 1.036 | -3.254 | 1.00 | 0.00 |
| ATOM | 1013 | HD21 | LEU | 65 | 0.945  | 1.665 | -2.979 | 1.00 | 0.00 |

|      |      |      |     |    |       |       |        |      |      |
|------|------|------|-----|----|-------|-------|--------|------|------|
| ATOM | 1014 | HD22 | LEU | 65 | 1.541 | 0.459 | -4.144 | 1.00 | 0.00 |
| ATOM | 1015 | HD23 | LEU | 65 | 2.019 | 0.355 | -2.433 | 1.00 | 0.00 |
| ATOM | 1016 | C    | LEU | 65 | 2.447 | 4.236 | -0.520 | 1.00 | 0.00 |
| ATOM | 1017 | O    | LEU | 65 | 1.972 | 3.796 | 0.525  | 1.00 | 0.00 |
| ATOM | 1018 | N    | ARG | 66 | 3.229 | 5.313 | -0.561 | 1.00 | 0.00 |
| ATOM | 1019 | H    | ARG | 66 | 3.617 | 5.640 | -1.434 | 1.00 | 0.00 |
| ATOM | 1020 | CA   | ARG | 66 | 3.567 | 6.036 | 0.661  | 1.00 | 0.00 |
| ATOM | 1021 | HA   | ARG | 66 | 4.112 | 5.383 | 1.344  | 1.00 | 0.00 |
| ATOM | 1022 | CB   | ARG | 66 | 4.451 | 7.242 | 0.328  | 1.00 | 0.00 |
| ATOM | 1023 | HB2  | ARG | 66 | 3.950 | 7.865 | -0.413 | 1.00 | 0.00 |
| ATOM | 1024 | HB3  | ARG | 66 | 4.626 | 7.824 | 1.233  | 1.00 | 0.00 |
| ATOM | 1025 | CG   | ARG | 66 | 5.791 | 6.758 | -0.234 | 1.00 | 0.00 |
| ATOM | 1026 | HG2  | ARG | 66 | 6.272 | 6.099 | 0.490  | 1.00 | 0.00 |
| ATOM | 1027 | HG3  | ARG | 66 | 5.620 | 6.213 | -1.162 | 1.00 | 0.00 |
| ATOM | 1028 | CD   | ARG | 66 | 6.697 | 7.962 | -0.508 | 1.00 | 0.00 |
| ATOM | 1029 | HD2  | ARG | 66 | 7.594 | 7.637 | -1.037 | 1.00 | 0.00 |
| ATOM | 1030 | HD3  | ARG | 66 | 6.165 | 8.695 | -1.113 | 1.00 | 0.00 |
| ATOM | 1031 | NE   | ARG | 66 | 7.097 | 8.593 | 0.748  | 1.00 | 0.00 |
| ATOM | 1032 | HE   | ARG | 66 | 6.636 | 9.436 | 1.058  | 1.00 | 0.00 |
| ATOM | 1033 | CZ   | ARG | 66 | 8.065 | 8.082 | 1.508  | 1.00 | 0.00 |
| ATOM | 1034 | NH1  | ARG | 66 | 8.685 | 6.993 | 1.139  | 1.00 | 0.00 |
| ATOM | 1035 | HH11 | ARG | 66 | 8.429 | 6.538 | 0.275  | 1.00 | 0.00 |

|      |      |      |     |    |        |        |        |      |      |
|------|------|------|-----|----|--------|--------|--------|------|------|
| ATOM | 1036 | HH12 | ARG | 66 | 9.418  | 6.611  | 1.720  | 1.00 | 0.00 |
| ATOM | 1037 | NH2  | ARG | 66 | 8.395  | 8.671  | 2.623  | 1.00 | 0.00 |
| ATOM | 1038 | HH21 | ARG | 66 | 7.916  | 9.513  | 2.907  | 1.00 | 0.00 |
| ATOM | 1039 | HH22 | ARG | 66 | 9.129  | 8.282  | 3.198  | 1.00 | 0.00 |
| ATOM | 1040 | C    | ARG | 66 | 2.303  | 6.512  | 1.373  | 1.00 | 0.00 |
| ATOM | 1041 | O    | ARG | 66 | 2.103  | 6.236  | 2.557  | 1.00 | 0.00 |
| ATOM | 1042 | N    | MET | 67 | 1.454  | 7.225  | 0.637  | 1.00 | 0.00 |
| ATOM | 1043 | H    | MET | 67 | 1.677  | 7.445  | -0.323 | 1.00 | 0.00 |
| ATOM | 1044 | CA   | MET | 67 | 0.205  | 7.738  | 1.193  | 1.00 | 0.00 |
| ATOM | 1045 | HA   | MET | 67 | 0.409  | 8.363  | 2.063  | 1.00 | 0.00 |
| ATOM | 1046 | CB   | MET | 67 | -0.521 | 8.584  | 0.141  | 1.00 | 0.00 |
| ATOM | 1047 | HB2  | MET | 67 | -0.011 | 9.541  | 0.031  | 1.00 | 0.00 |
| ATOM | 1048 | HB3  | MET | 67 | -0.515 | 8.058  | -0.814 | 1.00 | 0.00 |
| ATOM | 1049 | CG   | MET | 67 | -1.969 | 8.824  | 0.583  | 1.00 | 0.00 |
| ATOM | 1050 | HG2  | MET | 67 | -2.525 | 7.888  | 0.539  | 1.00 | 0.00 |
| ATOM | 1051 | HG3  | MET | 67 | -1.982 | 9.205  | 1.604  | 1.00 | 0.00 |
| ATOM | 1052 | SD   | MET | 67 | -2.751 | 10.035 | -0.515 | 1.00 | 0.00 |
| ATOM | 1053 | CE   | MET | 67 | -1.768 | 11.473 | -0.019 | 1.00 | 0.00 |
| ATOM | 1054 | HE1  | MET | 67 | -0.714 | 11.280 | -0.220 | 1.00 | 0.00 |
| ATOM | 1055 | HE2  | MET | 67 | -2.091 | 12.347 | -0.584 | 1.00 | 0.00 |
| ATOM | 1056 | HE3  | MET | 67 | -1.906 | 11.658 | 1.046  | 1.00 | 0.00 |
| ATOM | 1057 | C    | MET | 67 | -0.708 | 6.607  | 1.659  | 1.00 | 0.00 |

|      |      |     |     |    |        |       |        |      |      |
|------|------|-----|-----|----|--------|-------|--------|------|------|
| ATOM | 1058 | O   | MET | 67 | -1.246 | 6.645 | 2.766  | 1.00 | 0.00 |
| ATOM | 1059 | N   | MET | 68 | -0.895 | 5.617 | 0.793  | 1.00 | 0.00 |
| ATOM | 1060 | H   | MET | 68 | -0.460 | 5.648 | -0.118 | 1.00 | 0.00 |
| ATOM | 1061 | CA  | MET | 68 | -1.767 | 4.490 | 1.104  | 1.00 | 0.00 |
| ATOM | 1062 | HA  | MET | 68 | -2.765 | 4.842 | 1.362  | 1.00 | 0.00 |
| ATOM | 1063 | CB  | MET | 68 | -1.871 | 3.578 | -0.122 | 1.00 | 0.00 |
| ATOM | 1064 | HB2 | MET | 68 | -2.576 | 4.011 | -0.831 | 1.00 | 0.00 |
| ATOM | 1065 | HB3 | MET | 68 | -0.890 | 3.495 | -0.590 | 1.00 | 0.00 |
| ATOM | 1066 | CG  | MET | 68 | -2.357 | 2.185 | 0.295  | 1.00 | 0.00 |
| ATOM | 1067 | HG2 | MET | 68 | -1.566 | 1.666 | 0.838  | 1.00 | 0.00 |
| ATOM | 1068 | HG3 | MET | 68 | -3.235 | 2.277 | 0.934  | 1.00 | 0.00 |
| ATOM | 1069 | SD  | MET | 68 | -2.792 | 1.231 | -1.178 | 1.00 | 0.00 |
| ATOM | 1070 | CE  | MET | 68 | -1.115 | 1.035 | -1.826 | 1.00 | 0.00 |
| ATOM | 1071 | HE1 | MET | 68 | -0.502 | 0.507 | -1.095 | 1.00 | 0.00 |
| ATOM | 1072 | HE2 | MET | 68 | -1.147 | 0.463 | -2.753 | 1.00 | 0.00 |
| ATOM | 1073 | HE3 | MET | 68 | -0.683 | 2.016 | -2.020 | 1.00 | 0.00 |
| ATOM | 1074 | C   | MET | 68 | -1.264 | 3.702 | 2.310  | 1.00 | 0.00 |
| ATOM | 1075 | O   | MET | 68 | -2.040 | 3.381 | 3.208  | 1.00 | 0.00 |
| ATOM | 1076 | N   | MET | 69 | 0.029  | 3.389 | 2.331  | 1.00 | 0.00 |
| ATOM | 1077 | H   | MET | 69 | 0.641  | 3.650 | 1.571  | 1.00 | 0.00 |
| ATOM | 1078 | CA  | MET | 69 | 0.594  | 2.633 | 3.444  | 1.00 | 0.00 |
| ATOM | 1079 | HA  | MET | 69 | 0.197  | 1.618 | 3.447  | 1.00 | 0.00 |



|      |      |     |     |    |        |        |       |      |      |
|------|------|-----|-----|----|--------|--------|-------|------|------|
| ATOM | 1080 | CB  | MET | 69 | 2.119  | 2.562  | 3.308 | 1.00 | 0.00 |
| ATOM | 1081 | HB2 | MET | 69 | 2.376  | 2.167  | 2.325 | 1.00 | 0.00 |
| ATOM | 1082 | HB3 | MET | 69 | 2.539  | 3.562  | 3.418 | 1.00 | 0.00 |
| ATOM | 1083 | CG  | MET | 69 | 2.693  | 1.646  | 4.392 | 1.00 | 0.00 |
| ATOM | 1084 | HG2 | MET | 69 | 2.389  | 2.003  | 5.376 | 1.00 | 0.00 |
| ATOM | 1085 | HG3 | MET | 69 | 2.328  | 0.629  | 4.247 | 1.00 | 0.00 |
| ATOM | 1086 | SD  | MET | 69 | 4.500  | 1.649  | 4.290 | 1.00 | 0.00 |
| ATOM | 1087 | CE  | MET | 69 | 4.805  | 0.418  | 5.581 | 1.00 | 0.00 |
| ATOM | 1088 | HE1 | MET | 69 | 4.327  | -0.523 | 5.307 | 1.00 | 0.00 |
| ATOM | 1089 | HE2 | MET | 69 | 5.879  | 0.261  | 5.689 | 1.00 | 0.00 |
| ATOM | 1090 | HE3 | MET | 69 | 4.394  | 0.772  | 6.526 | 1.00 | 0.00 |
| ATOM | 1091 | C   | MET | 69 | 0.224  | 3.288  | 4.772 | 1.00 | 0.00 |
| ATOM | 1092 | O   | MET | 69 | -0.334 | 2.644  | 5.661 | 1.00 | 0.00 |
| ATOM | 1093 | N   | ARG | 70 | 0.534  | 4.575  | 4.890 | 1.00 | 0.00 |
| ATOM | 1094 | H   | ARG | 70 | 1.007  | 5.053  | 4.137 | 1.00 | 0.00 |
| ATOM | 1095 | CA  | ARG | 70 | 0.229  | 5.326  | 6.103 | 1.00 | 0.00 |
| ATOM | 1096 | HA  | ARG | 70 | 0.706  | 4.860  | 6.966 | 1.00 | 0.00 |
| ATOM | 1097 | CB  | ARG | 70 | 0.758  | 6.757  | 5.965 | 1.00 | 0.00 |
| ATOM | 1098 | HB2 | ARG | 70 | 0.319  | 7.224  | 5.084 | 1.00 | 0.00 |
| ATOM | 1099 | HB3 | ARG | 70 | 0.490  | 7.331  | 6.852 | 1.00 | 0.00 |
| ATOM | 1100 | CG  | ARG | 70 | 2.283  | 6.725  | 5.820 | 1.00 | 0.00 |
| ATOM | 1101 | HG2 | ARG | 70 | 2.721  | 6.252  | 6.699 | 1.00 | 0.00 |

|      |      |          |    |        |        |       |      |      |
|------|------|----------|----|--------|--------|-------|------|------|
| ATOM | 1102 | HG3 ARG  | 70 | 2.551  | 6.154  | 4.931 | 1.00 | 0.00 |
| ATOM | 1103 | CD ARG   | 70 | 2.818  | 8.153  | 5.690 | 1.00 | 0.00 |
| ATOM | 1104 | HD2 ARG  | 70 | 2.250  | 8.696  | 4.935 | 1.00 | 0.00 |
| ATOM | 1105 | HD3 ARG  | 70 | 2.737  | 8.669  | 6.647 | 1.00 | 0.00 |
| ATOM | 1106 | NE ARG   | 70 | 4.222  | 8.128  | 5.290 | 1.00 | 0.00 |
| ATOM | 1107 | HE ARG   | 70 | 4.798  | 7.330  | 5.519 | 1.00 | 0.00 |
| ATOM | 1108 | CZ ARG   | 70 | 4.774  | 9.141  | 4.622 | 1.00 | 0.00 |
| ATOM | 1109 | NH1 ARG  | 70 | 4.065  | 10.196 | 4.318 | 1.00 | 0.00 |
| ATOM | 1110 | HH11 ARG | 70 | 3.094  | 10.243 | 4.591 | 1.00 | 0.00 |
| ATOM | 1111 | HH12 ARG | 70 | 4.492  | 10.958 | 3.812 | 1.00 | 0.00 |
| ATOM | 1112 | NH2 ARG  | 70 | 6.029  | 9.080  | 4.270 | 1.00 | 0.00 |
| ATOM | 1113 | HH21 ARG | 70 | 6.578  | 8.265  | 4.506 | 1.00 | 0.00 |
| ATOM | 1114 | HH22 ARG | 70 | 6.447  | 9.848  | 3.764 | 1.00 | 0.00 |
| ATOM | 1115 | C ARG    | 70 | -1.277 | 5.361  | 6.363 | 1.00 | 0.00 |
| ATOM | 1116 | O ARG    | 70 | -1.723 | 5.209  | 7.500 | 1.00 | 0.00 |
| ATOM | 1117 | N MET    | 71 | -2.051 | 5.570  | 5.297 | 1.00 | 0.00 |
| ATOM | 1118 | H MET    | 71 | -1.631 | 5.712  | 4.390 | 1.00 | 0.00 |
| ATOM | 1119 | CA MET   | 71 | -3.503 | 5.635  | 5.405 | 1.00 | 0.00 |
| ATOM | 1120 | HA MET   | 71 | -3.790 | 6.382  | 6.145 | 1.00 | 0.00 |
| ATOM | 1121 | CB MET   | 71 | -4.109 | 6.026  | 4.054 | 1.00 | 0.00 |
| ATOM | 1122 | HB2 MET  | 71 | -3.593 | 6.905  | 3.667 | 1.00 | 0.00 |
| ATOM | 1123 | HB3 MET  | 71 | -3.993 | 5.199  | 3.353 | 1.00 | 0.00 |

|      |      |     |     |    |        |        |       |      |      |
|------|------|-----|-----|----|--------|--------|-------|------|------|
| ATOM | 1124 | CG  | MET | 71 | -5.598 | 6.343  | 4.229 | 1.00 | 0.00 |
| ATOM | 1125 | HG2 | MET | 71 | -6.101 | 5.497  | 4.698 | 1.00 | 0.00 |
| ATOM | 1126 | HG3 | MET | 71 | -5.714 | 7.227  | 4.856 | 1.00 | 0.00 |
| ATOM | 1127 | SD  | MET | 71 | -6.346 | 6.659  | 2.610 | 1.00 | 0.00 |
| ATOM | 1128 | CE  | MET | 71 | -5.409 | 8.154  | 2.203 | 1.00 | 0.00 |
| ATOM | 1129 | HE1 | MET | 71 | -4.344 | 7.921  | 2.182 | 1.00 | 0.00 |
| ATOM | 1130 | HE2 | MET | 71 | -5.719 | 8.523  | 1.226 | 1.00 | 0.00 |
| ATOM | 1131 | HE3 | MET | 71 | -5.598 | 8.918  | 2.957 | 1.00 | 0.00 |
| ATOM | 1132 | C   | MET | 71 | -4.074 | 4.299  | 5.860 | 1.00 | 0.00 |
| ATOM | 1133 | O   | MET | 71 | -5.022 | 4.255  | 6.644 | 1.00 | 0.00 |
| ATOM | 1134 | N   | MET | 72 | -3.501 | 3.213  | 5.353 | 1.00 | 0.00 |
| ATOM | 1135 | H   | MET | 72 | -2.739 | 3.289  | 4.694 | 1.00 | 0.00 |
| ATOM | 1136 | CA  | MET | 72 | -3.975 | 1.884  | 5.709 | 1.00 | 0.00 |
| ATOM | 1137 | HA  | MET | 72 | -5.010 | 1.759  | 5.392 | 1.00 | 0.00 |
| ATOM | 1138 | CB  | MET | 72 | -3.119 | 0.818  | 5.017 | 1.00 | 0.00 |
| ATOM | 1139 | HB2 | MET | 72 | -2.068 | 1.099  | 5.088 | 1.00 | 0.00 |
| ATOM | 1140 | HB3 | MET | 72 | -3.272 | -0.142 | 5.511 | 1.00 | 0.00 |
| ATOM | 1141 | CG  | MET | 72 | -3.518 | 0.703  | 3.543 | 1.00 | 0.00 |
| ATOM | 1142 | HG2 | MET | 72 | -3.489 | 1.687  | 3.076 | 1.00 | 0.00 |
| ATOM | 1143 | HG3 | MET | 72 | -2.828 | 0.035  | 3.026 | 1.00 | 0.00 |
| ATOM | 1144 | SD  | MET | 72 | -5.197 | 0.035  | 3.421 | 1.00 | 0.00 |
| ATOM | 1145 | CE  | MET | 72 | -4.853 | -1.589 | 4.146 | 1.00 | 0.00 |

|      |      |      |     |    |        |        |        |      |      |
|------|------|------|-----|----|--------|--------|--------|------|------|
| ATOM | 1146 | HE1  | MET | 72 | -4.477 | -1.462 | 5.162  | 1.00 | 0.00 |
| ATOM | 1147 | HE2  | MET | 72 | -5.769 | -2.179 | 4.169  | 1.00 | 0.00 |
| ATOM | 1148 | HE3  | MET | 72 | -4.104 | -2.105 | 3.545  | 1.00 | 0.00 |
| ATOM | 1149 | C    | MET | 72 | -3.928 | 1.676  | 7.217  | 1.00 | 0.00 |
| ATOM | 1150 | O    | MET | 72 | -4.943 | 1.360  | 7.841  | 1.00 | 0.00 |
| ATOM | 1151 | N    | GLN | 73 | -2.746 | 1.862  | 7.795  | 1.00 | 0.00 |
| ATOM | 1152 | H    | GLN | 73 | -1.936 | 2.098  | 7.239  | 1.00 | 0.00 |
| ATOM | 1153 | CA   | GLN | 73 | -2.573 | 1.701  | 9.233  | 1.00 | 0.00 |
| ATOM | 1154 | HA   | GLN | 73 | -2.862 | 0.693  | 9.533  | 1.00 | 0.00 |
| ATOM | 1155 | CB   | GLN | 73 | -1.107 | 1.923  | 9.614  | 1.00 | 0.00 |
| ATOM | 1156 | HB2  | GLN | 73 | -0.813 | 2.937  | 9.345  | 1.00 | 0.00 |
| ATOM | 1157 | HB3  | GLN | 73 | -0.988 | 1.784  | 10.689 | 1.00 | 0.00 |
| ATOM | 1158 | CG   | GLN | 73 | -0.221 | 0.921  | 8.869  | 1.00 | 0.00 |
| ATOM | 1159 | HG2  | GLN | 73 | -0.206 | 1.138  | 7.801  | 1.00 | 0.00 |
| ATOM | 1160 | HG3  | GLN | 73 | 0.794  | 0.973  | 9.264  | 1.00 | 0.00 |
| ATOM | 1161 | CD   | GLN | 73 | -0.749 | -0.493 | 9.071  | 1.00 | 0.00 |
| ATOM | 1162 | OE1  | GLN | 73 | -0.713 | -1.020 | 10.183 | 1.00 | 0.00 |
| ATOM | 1163 | NE2  | GLN | 73 | -1.256 | -1.134 | 8.057  | 1.00 | 0.00 |
| ATOM | 1164 | HE21 | GLN | 73 | -1.608 | -2.073 | 8.182  | 1.00 | 0.00 |
| ATOM | 1165 | HE22 | GLN | 73 | -1.294 | -0.690 | 7.151  | 1.00 | 0.00 |
| ATOM | 1166 | C    | GLN | 73 | -3.458 | 2.683  | 9.994  | 1.00 | 0.00 |
| ATOM | 1167 | O    | GLN | 73 | -4.053 | 2.339  | 11.011 | 1.00 | 0.00 |

|      |      |      |     |    |        |       |        |      |      |
|------|------|------|-----|----|--------|-------|--------|------|------|
| ATOM | 1168 | N    | GLN | 74 | -3.530 | 3.910 | 9.491  | 1.00 | 0.00 |
| ATOM | 1169 | H    | GLN | 74 | -2.995 | 4.158 | 8.671  | 1.00 | 0.00 |
| ATOM | 1170 | CA   | GLN | 74 | -4.335 | 4.944 | 10.130 | 1.00 | 0.00 |
| ATOM | 1171 | HA   | GLN | 74 | -4.025 | 5.075 | 11.167 | 1.00 | 0.00 |
| ATOM | 1172 | CB   | GLN | 74 | -4.148 | 6.273 | 9.391  | 1.00 | 0.00 |
| ATOM | 1173 | HB2  | GLN | 74 | -3.211 | 6.734 | 9.704  | 1.00 | 0.00 |
| ATOM | 1174 | HB3  | GLN | 74 | -4.121 | 6.090 | 8.317  | 1.00 | 0.00 |
| ATOM | 1175 | CG   | GLN | 74 | -5.312 | 7.210 | 9.720  | 1.00 | 0.00 |
| ATOM | 1176 | HG2  | GLN | 74 | -5.854 | 6.847 | 10.594 | 1.00 | 0.00 |
| ATOM | 1177 | HG3  | GLN | 74 | -4.936 | 8.214 | 9.918  | 1.00 | 0.00 |
| ATOM | 1178 | CD   | GLN | 74 | -6.275 | 7.274 | 8.541  | 1.00 | 0.00 |
| ATOM | 1179 | OE1  | GLN | 74 | -6.305 | 6.288 | 7.690  | 1.00 | 0.00 |
| ATOM | 1180 | NE2  | GLN | 74 | -7.020 | 8.243 | 8.395  | 1.00 | 0.00 |
| ATOM | 1181 | HE21 | GLN | 74 | -7.654 | 8.274 | 7.610  | 1.00 | 0.00 |
| ATOM | 1182 | HE22 | GLN | 74 | -6.993 | 9.001 | 9.062  | 1.00 | 0.00 |
| ATOM | 1183 | C    | GLN | 74 | -5.815 | 4.566 | 10.166 | 1.00 | 0.00 |
| ATOM | 1184 | O    | GLN | 74 | -6.485 | 4.757 | 11.182 | 1.00 | 0.00 |
| ATOM | 1185 | N    | LYS | 75 | -6.320 | 4.044 | 9.055  | 1.00 | 0.00 |
| ATOM | 1186 | H    | LYS | 75 | -5.741 | 3.915 | 8.237  | 1.00 | 0.00 |
| ATOM | 1187 | CA   | LYS | 75 | -7.727 | 3.666 | 8.974  | 1.00 | 0.00 |
| ATOM | 1188 | HA   | LYS | 75 | -8.361 | 4.537 | 9.139  | 1.00 | 0.00 |
| ATOM | 1189 | CB   | LYS | 75 | -8.027 | 3.097 | 7.584  | 1.00 | 0.00 |

|      |      |     |     |    |         |        |        |      |      |
|------|------|-----|-----|----|---------|--------|--------|------|------|
| ATOM | 1190 | HB2 | LYS | 75 | -7.695  | 3.806  | 6.826  | 1.00 | 0.00 |
| ATOM | 1191 | HB3 | LYS | 75 | -7.493  | 2.155  | 7.458  | 1.00 | 0.00 |
| ATOM | 1192 | CG  | LYS | 75 | -9.534  | 2.855  | 7.433  | 1.00 | 0.00 |
| ATOM | 1193 | HG2 | LYS | 75 | -9.710  | 2.198  | 6.581  | 1.00 | 0.00 |
| ATOM | 1194 | HG3 | LYS | 75 | -9.916  | 2.384  | 8.339  | 1.00 | 0.00 |
| ATOM | 1195 | CD  | LYS | 75 | -10.255 | 4.188  | 7.207  | 1.00 | 0.00 |
| ATOM | 1196 | HD2 | LYS | 75 | -10.137 | 4.818  | 8.089  | 1.00 | 0.00 |
| ATOM | 1197 | HD3 | LYS | 75 | -9.825  | 4.691  | 6.341  | 1.00 | 0.00 |
| ATOM | 1198 | CE  | LYS | 75 | -11.743 | 3.930  | 6.960  | 1.00 | 0.00 |
| ATOM | 1199 | HE2 | LYS | 75 | -12.132 | 3.276  | 7.740  | 1.00 | 0.00 |
| ATOM | 1200 | HE3 | LYS | 75 | -12.283 | 4.876  | 6.977  | 1.00 | 0.00 |
| ATOM | 1201 | NZ  | LYS | 75 | -11.922 | 3.279  | 5.631  | 1.00 | 0.00 |
| ATOM | 1202 | HZ1 | LYS | 75 | -11.421 | 2.401  | 5.616  | 1.00 | 0.00 |
| ATOM | 1203 | HZ2 | LYS | 75 | -12.904 | 3.109  | 5.469  | 1.00 | 0.00 |
| ATOM | 1204 | HZ3 | LYS | 75 | -11.561 | 3.885  | 4.908  | 1.00 | 0.00 |
| ATOM | 1205 | C   | LYS | 75 | -8.075  | 2.629  | 10.038 | 1.00 | 0.00 |
| ATOM | 1206 | O   | LYS | 75 | -9.130  | 2.703  | 10.670 | 1.00 | 0.00 |
| ATOM | 1207 | N   | GLU | 76 | -7.181  | 1.668  | 10.225 | 1.00 | 0.00 |
| ATOM | 1208 | H   | GLU | 76 | -6.339  | 1.635  | 9.667  | 1.00 | 0.00 |
| ATOM | 1209 | CA  | GLU | 76 | -7.398  | 0.613  | 11.214 | 1.00 | 0.00 |
| ATOM | 1210 | HA  | GLU | 76 | -7.712  | 1.047  | 12.163 | 1.00 | 0.00 |
| ATOM | 1211 | CB  | GLU | 76 | -8.495  | -0.343 | 10.725 | 1.00 | 0.00 |

|      |      |     |     |    |         |        |        |      |      |
|------|------|-----|-----|----|---------|--------|--------|------|------|
| ATOM | 1212 | HB2 | GLU | 76 | -9.366  | 0.235  | 10.418 | 1.00 | 0.00 |
| ATOM | 1213 | HB3 | GLU | 76 | -8.122  | -0.916 | 9.876  | 1.00 | 0.00 |
| ATOM | 1214 | CG  | GLU | 76 | -8.891  | -1.304 | 11.856 | 1.00 | 0.00 |
| ATOM | 1215 | HG2 | GLU | 76 | -9.555  | -2.069 | 11.453 | 1.00 | 0.00 |
| ATOM | 1216 | HG3 | GLU | 76 | -7.991  | -1.776 | 12.251 | 1.00 | 0.00 |
| ATOM | 1217 | CD  | GLU | 76 | -9.605  | -0.550 | 12.979 | 1.00 | 0.00 |
| ATOM | 1218 | OE1 | GLU | 76 | -10.223 | 0.466  | 12.696 | 1.00 | 0.00 |
| ATOM | 1219 | OE2 | GLU | 76 | -9.523  | -1.000 | 14.110 | 1.00 | 0.00 |
| ATOM | 1220 | C   | GLU | 76 | -6.107  | -0.163 | 11.466 | 1.00 | 0.00 |
| ATOM | 1221 | O   | GLU | 76 | -5.950  | -1.290 | 10.992 | 1.00 | 0.00 |
| ATOM | 1222 | N   | MET | 77 | -5.182  | 0.446  | 12.201 | 1.00 | 0.00 |
| ATOM | 1223 | H   | MET | 77 | -5.337  | 1.381  | 12.549 | 1.00 | 0.00 |
| ATOM | 1224 | CA  | MET | 77 | -3.906  | -0.200 | 12.499 | 1.00 | 0.00 |
| ATOM | 1225 | HA  | MET | 77 | -3.354  | -0.381 | 11.577 | 1.00 | 0.00 |
| ATOM | 1226 | CB  | MET | 77 | -3.061  | 0.702  | 13.407 | 1.00 | 0.00 |
| ATOM | 1227 | HB2 | MET | 77 | -2.995  | 1.697  | 12.968 | 1.00 | 0.00 |
| ATOM | 1228 | HB3 | MET | 77 | -3.530  | 0.769  | 14.389 | 1.00 | 0.00 |
| ATOM | 1229 | CG  | MET | 77 | -1.654  | 0.115  | 13.554 | 1.00 | 0.00 |
| ATOM | 1230 | HG2 | MET | 77 | -1.717  | -0.904 | 13.936 | 1.00 | 0.00 |
| ATOM | 1231 | HG3 | MET | 77 | -1.154  | 0.108  | 12.586 | 1.00 | 0.00 |
| ATOM | 1232 | SD  | MET | 77 | -0.697  | 1.125  | 14.710 | 1.00 | 0.00 |
| ATOM | 1233 | CE  | MET | 77 | 0.872   | 0.239  | 14.544 | 1.00 | 0.00 |

|      |      |      |     |    |        |        |        |      |      |
|------|------|------|-----|----|--------|--------|--------|------|------|
| ATOM | 1234 | HE1  | MET | 77 | 1.205  | 0.280  | 13.507 | 1.00 | 0.00 |
| ATOM | 1235 | HE2  | MET | 77 | 1.622  | 0.703  | 15.185 | 1.00 | 0.00 |
| ATOM | 1236 | HE3  | MET | 77 | 0.736  | -0.801 | 14.841 | 1.00 | 0.00 |
| ATOM | 1237 | C    | MET | 77 | -4.124 | -1.553 | 13.176 | 1.00 | 0.00 |
| ATOM | 1238 | O    | MET | 77 | -4.237 | -1.629 | 14.401 | 1.00 | 0.00 |
| ATOM | 1239 | N    | GLN | 78 | -4.168 | -2.617 | 12.377 | 1.00 | 0.00 |
| ATOM | 1240 | H    | GLN | 78 | -4.087 | -2.512 | 11.376 | 1.00 | 0.00 |
| ATOM | 1241 | CA   | GLN | 78 | -4.353 | -3.960 | 12.919 | 1.00 | 0.00 |
| ATOM | 1242 | HA   | GLN | 78 | -5.339 | -4.046 | 13.376 | 1.00 | 0.00 |
| ATOM | 1243 | CB   | GLN | 78 | -4.240 | -5.001 | 11.798 | 1.00 | 0.00 |
| ATOM | 1244 | HB2  | GLN | 78 | -3.816 | -4.532 | 10.910 | 1.00 | 0.00 |
| ATOM | 1245 | HB3  | GLN | 78 | -3.591 | -5.815 | 12.124 | 1.00 | 0.00 |
| ATOM | 1246 | CG   | GLN | 78 | -5.629 | -5.557 | 11.468 | 1.00 | 0.00 |
| ATOM | 1247 | HG2  | GLN | 78 | -6.076 | -5.997 | 12.360 | 1.00 | 0.00 |
| ATOM | 1248 | HG3  | GLN | 78 | -6.271 | -4.759 | 11.097 | 1.00 | 0.00 |
| ATOM | 1249 | CD   | GLN | 78 | -5.520 | -6.636 | 10.393 | 1.00 | 0.00 |
| ATOM | 1250 | OE1  | GLN | 78 | -4.708 | -7.554 | 10.512 | 1.00 | 0.00 |
| ATOM | 1251 | NE2  | GLN | 78 | -6.295 | -6.580 | 9.344  | 1.00 | 0.00 |
| ATOM | 1252 | HE21 | GLN | 78 | -6.226 | -7.292 | 8.631  | 1.00 | 0.00 |
| ATOM | 1253 | HE22 | GLN | 78 | -6.959 | -5.826 | 9.251  | 1.00 | 0.00 |
| ATOM | 1254 | C    | GLN | 78 | -3.294 | -4.232 | 13.988 | 1.00 | 0.00 |
| ATOM | 1255 | O    | GLN | 78 | -2.115 | -3.942 | 13.777 | 1.00 | 0.00 |



|      |      |     |     |    |        |        |        |      |      |
|------|------|-----|-----|----|--------|--------|--------|------|------|
| ATOM | 1256 | N   | PRO | 79 | -3.674 | -4.772 | 15.120 | 1.00 | 0.00 |
| ATOM | 1257 | CD  | PRO | 79 | -5.037 | -5.167 | 15.494 | 1.00 | 0.00 |
| ATOM | 1258 | HD2 | PRO | 79 | -5.315 | -6.064 | 14.940 | 1.00 | 0.00 |
| ATOM | 1259 | HD3 | PRO | 79 | -5.725 | -4.359 | 15.247 | 1.00 | 0.00 |
| ATOM | 1260 | CG  | PRO | 79 | -4.943 | -5.414 | 17.008 | 1.00 | 0.00 |
| ATOM | 1261 | HG2 | PRO | 79 | -5.056 | -6.481 | 17.201 | 1.00 | 0.00 |
| ATOM | 1262 | HG3 | PRO | 79 | -5.743 | -4.868 | 17.507 | 1.00 | 0.00 |
| ATOM | 1263 | CB  | PRO | 79 | -3.605 | -4.919 | 17.449 | 1.00 | 0.00 |
| ATOM | 1264 | HB2 | PRO | 79 | -3.247 | -5.579 | 18.240 | 1.00 | 0.00 |
| ATOM | 1265 | HB3 | PRO | 79 | -3.583 | -3.888 | 17.800 | 1.00 | 0.00 |
| ATOM | 1266 | CA  | PRO | 79 | -2.726 | -5.066 | 16.216 | 1.00 | 0.00 |
| ATOM | 1267 | HA  | PRO | 79 | -1.905 | -4.351 | 16.165 | 1.00 | 0.00 |
| ATOM | 1268 | C   | PRO | 79 | -2.173 | -6.479 | 16.111 | 1.00 | 0.00 |
| ATOM | 1269 | O   | PRO | 79 | -2.893 | -7.461 | 16.300 | 1.00 | 0.00 |
| ATOM | 1270 | N   | ARG | 80 | -0.891 | -6.561 | 15.821 | 1.00 | 0.00 |
| ATOM | 1271 | H   | ARG | 80 | -0.356 | -5.720 | 15.657 | 1.00 | 0.00 |
| ATOM | 1272 | CA  | ARG | 80 | -0.215 | -7.843 | 15.699 | 1.00 | 0.00 |
| ATOM | 1273 | HA  | ARG | 80 | -0.338 | -8.414 | 16.620 | 1.00 | 0.00 |
| ATOM | 1274 | CB  | ARG | 80 | -0.802 | -8.651 | 14.540 | 1.00 | 0.00 |
| ATOM | 1275 | HB2 | ARG | 80 | -1.506 | -8.033 | 13.984 | 1.00 | 0.00 |
| ATOM | 1276 | HB3 | ARG | 80 | 0.001  | -8.974 | 13.877 | 1.00 | 0.00 |
| ATOM | 1277 | CG  | ARG | 80 | -1.529 | -9.879 | 15.095 | 1.00 | 0.00 |

|      |      |          |    |        |         |        |      |      |
|------|------|----------|----|--------|---------|--------|------|------|
| ATOM | 1278 | HG2 ARG  | 80 | -0.815 | -10.691 | 15.232 | 1.00 | 0.00 |
| ATOM | 1279 | HG3 ARG  | 80 | -1.982 | -9.629  | 16.055 | 1.00 | 0.00 |
| ATOM | 1280 | CD ARG   | 80 | -2.618 | -10.318 | 14.117 | 1.00 | 0.00 |
| ATOM | 1281 | HD2 ARG  | 80 | -2.461 | -9.842  | 13.149 | 1.00 | 0.00 |
| ATOM | 1282 | HD3 ARG  | 80 | -2.593 | -11.401 | 13.997 | 1.00 | 0.00 |
| ATOM | 1283 | NE ARG   | 80 | -3.935 | -9.932  | 14.621 | 1.00 | 0.00 |
| ATOM | 1284 | HE ARG   | 80 | -4.403 | -10.519 | 15.298 | 1.00 | 0.00 |
| ATOM | 1285 | CZ ARG   | 80 | -4.546 | -8.820  | 14.212 | 1.00 | 0.00 |
| ATOM | 1286 | NH1 ARG  | 80 | -3.970 | -8.028  | 13.348 | 1.00 | 0.00 |
| ATOM | 1287 | HH11 ARG | 80 | -3.055 | -8.260  | 12.987 | 1.00 | 0.00 |
| ATOM | 1288 | HH12 ARG | 80 | -4.441 | -7.188  | 13.045 | 1.00 | 0.00 |
| ATOM | 1289 | NH2 ARG  | 80 | -5.726 | -8.521  | 14.679 | 1.00 | 0.00 |
| ATOM | 1290 | HH21 ARG | 80 | -6.171 | -9.133  | 15.348 | 1.00 | 0.00 |
| ATOM | 1291 | HH22 ARG | 80 | -6.189 | -7.679  | 14.370 | 1.00 | 0.00 |
| ATOM | 1292 | C ARG    | 80 | 1.275  | -7.624  | 15.473 | 1.00 | 0.00 |
| ATOM | 1293 | O ARG    | 80 | 1.664  | -6.876  | 14.575 | 1.00 | 0.00 |
| ATOM | 1294 | N GLY    | 81 | 2.107  | -8.267  | 16.285 | 1.00 | 0.00 |
| ATOM | 1295 | H GLY    | 81 | 1.766  | -8.877  | 17.015 | 1.00 | 0.00 |
| ATOM | 1296 | CA GLY   | 81 | 3.546  | -8.105  | 16.139 | 1.00 | 0.00 |
| ATOM | 1297 | HA2 GLY  | 81 | 3.749  | -7.109  | 15.747 | 1.00 | 0.00 |
| ATOM | 1298 | HA3 GLY  | 81 | 4.012  | -8.211  | 17.119 | 1.00 | 0.00 |
| ATOM | 1299 | C GLY    | 81 | 4.142  | -9.143  | 15.191 | 1.00 | 0.00 |

|      |      |     |     |    |       |         |        |      |      |
|------|------|-----|-----|----|-------|---------|--------|------|------|
| ATOM | 1300 | O   | GLY | 81 | 4.520 | -8.820  | 14.068 | 1.00 | 0.00 |
| ATOM | 1301 | N   | GLU | 82 | 4.236 | -10.383 | 15.661 | 1.00 | 0.00 |
| ATOM | 1302 | H   | GLU | 82 | 3.936 | -10.590 | 16.603 | 1.00 | 0.00 |
| ATOM | 1303 | CA  | GLU | 82 | 4.811 | -11.467 | 14.863 | 1.00 | 0.00 |
| ATOM | 1304 | HA  | GLU | 82 | 5.818 | -11.203 | 14.539 | 1.00 | 0.00 |
| ATOM | 1305 | CB  | GLU | 82 | 4.887 | -12.744 | 15.706 | 1.00 | 0.00 |
| ATOM | 1306 | HB2 | GLU | 82 | 3.903 | -12.962 | 16.121 | 1.00 | 0.00 |
| ATOM | 1307 | HB3 | GLU | 82 | 5.207 | -13.574 | 15.076 | 1.00 | 0.00 |
| ATOM | 1308 | CG  | GLU | 82 | 5.894 | -12.553 | 16.850 | 1.00 | 0.00 |
| ATOM | 1309 | HG2 | GLU | 82 | 6.186 | -13.533 | 17.228 | 1.00 | 0.00 |
| ATOM | 1310 | HG3 | GLU | 82 | 6.773 | -12.038 | 16.462 | 1.00 | 0.00 |
| ATOM | 1311 | CD  | GLU | 82 | 5.280 | -11.730 | 17.986 | 1.00 | 0.00 |
| ATOM | 1312 | OE1 | GLU | 82 | 4.067 | -11.751 | 18.131 | 1.00 | 0.00 |
| ATOM | 1313 | OE2 | GLU | 82 | 6.036 | -11.088 | 18.697 | 1.00 | 0.00 |
| ATOM | 1314 | C   | GLU | 82 | 4.020 | -11.755 | 13.585 | 1.00 | 0.00 |
| ATOM | 1315 | O   | GLU | 82 | 4.608 | -11.957 | 12.522 | 1.00 | 0.00 |
| ATOM | 1316 | N   | GLN | 83 | 2.694 | -11.814 | 13.695 | 1.00 | 0.00 |
| ATOM | 1317 | H   | GLN | 83 | 2.245 | -11.671 | 14.588 | 1.00 | 0.00 |
| ATOM | 1318 | CA  | GLN | 83 | 1.854 | -12.127 | 12.538 | 1.00 | 0.00 |
| ATOM | 1319 | HA  | GLN | 83 | 2.123 | -13.102 | 12.130 | 1.00 | 0.00 |
| ATOM | 1320 | CB  | GLN | 83 | 0.382 | -12.163 | 12.965 | 1.00 | 0.00 |
| ATOM | 1321 | HB2 | GLN | 83 | 0.272 | -12.829 | 13.821 | 1.00 | 0.00 |

|      |      |      |     |    |        |         |        |      |      |
|------|------|------|-----|----|--------|---------|--------|------|------|
| ATOM | 1322 | HB3  | GLN | 83 | 0.063  | -11.159 | 13.244 | 1.00 | 0.00 |
| ATOM | 1323 | CG   | GLN | 83 | -0.484 | -12.671 | 11.808 | 1.00 | 0.00 |
| ATOM | 1324 | HG2  | GLN | 83 | -1.537 | -12.492 | 12.024 | 1.00 | 0.00 |
| ATOM | 1325 | HG3  | GLN | 83 | -0.210 | -12.158 | 10.886 | 1.00 | 0.00 |
| ATOM | 1326 | CD   | GLN | 83 | -0.274 | -14.170 | 11.613 | 1.00 | 0.00 |
| ATOM | 1327 | OE1  | GLN | 83 | -0.669 | -14.968 | 12.462 | 1.00 | 0.00 |
| ATOM | 1328 | NE2  | GLN | 83 | 0.327  | -14.601 | 10.538 | 1.00 | 0.00 |
| ATOM | 1329 | HE21 | GLN | 83 | 0.468  | -15.593 | 10.405 | 1.00 | 0.00 |
| ATOM | 1330 | HE22 | GLN | 83 | 0.649  | -13.942 | 9.844  | 1.00 | 0.00 |
| ATOM | 1331 | C    | GLN | 83 | 2.032  | -11.114 | 11.404 | 1.00 | 0.00 |
| ATOM | 1332 | O    | GLN | 83 | 2.505  | -11.460 | 10.322 | 1.00 | 0.00 |
| ATOM | 1333 | N    | MET | 84 | 1.640  | -9.869  | 11.659 | 1.00 | 0.00 |
| ATOM | 1334 | H    | MET | 84 | 1.198  | -9.647  | 12.540 | 1.00 | 0.00 |
| ATOM | 1335 | CA   | MET | 84 | 1.750  | -8.815  | 10.653 | 1.00 | 0.00 |
| ATOM | 1336 | HA   | MET | 84 | 1.256  | -9.127  | 9.733  | 1.00 | 0.00 |
| ATOM | 1337 | CB   | MET | 84 | 1.085  | -7.533  | 11.154 | 1.00 | 0.00 |
| ATOM | 1338 | HB2  | MET | 84 | 1.346  | -7.371  | 12.200 | 1.00 | 0.00 |
| ATOM | 1339 | HB3  | MET | 84 | 1.428  | -6.687  | 10.559 | 1.00 | 0.00 |
| ATOM | 1340 | CG   | MET | 84 | -0.439 | -7.667  | 11.022 | 1.00 | 0.00 |
| ATOM | 1341 | HG2  | MET | 84 | -0.706 | -7.833  | 9.979  | 1.00 | 0.00 |
| ATOM | 1342 | HG3  | MET | 84 | -0.789 | -8.506  | 11.624 | 1.00 | 0.00 |
| ATOM | 1343 | SD   | MET | 84 | -1.229 | -6.146  | 11.604 | 1.00 | 0.00 |

|      |      |     |     |    |        |         |        |      |      |
|------|------|-----|-----|----|--------|---------|--------|------|------|
| ATOM | 1344 | CE  | MET | 84 | -0.749 | -5.084  | 10.219 | 1.00 | 0.00 |
| ATOM | 1345 | HE1 | MET | 84 | -1.154 | -5.490  | 9.292  | 1.00 | 0.00 |
| ATOM | 1346 | HE2 | MET | 84 | -1.141 | -4.080  | 10.378 | 1.00 | 0.00 |
| ATOM | 1347 | HE3 | MET | 84 | 0.338  | -5.043  | 10.152 | 1.00 | 0.00 |
| ATOM | 1348 | C   | MET | 84 | 3.199  | -8.552  | 10.245 | 1.00 | 0.00 |
| ATOM | 1349 | O   | MET | 84 | 3.457  | -8.155  | 9.110  | 1.00 | 0.00 |
| ATOM | 1350 | N   | ARG | 85 | 4.146  | -8.767  | 11.159 | 1.00 | 0.00 |
| ATOM | 1351 | H   | ARG | 85 | 3.918  | -9.073  | 12.094 | 1.00 | 0.00 |
| ATOM | 1352 | CA  | ARG | 85 | 5.553  | -8.535  | 10.829 | 1.00 | 0.00 |
| ATOM | 1353 | HA  | ARG | 85 | 5.728  | -7.470  | 10.680 | 1.00 | 0.00 |
| ATOM | 1354 | CB  | ARG | 85 | 6.456  | -9.024  | 11.967 | 1.00 | 0.00 |
| ATOM | 1355 | HB2 | ARG | 85 | 6.225  | -8.467  | 12.875 | 1.00 | 0.00 |
| ATOM | 1356 | HB3 | ARG | 85 | 6.277  | -10.086 | 12.138 | 1.00 | 0.00 |
| ATOM | 1357 | CG  | ARG | 85 | 7.927  | -8.808  | 11.597 | 1.00 | 0.00 |
| ATOM | 1358 | HG2 | ARG | 85 | 8.182  | -9.426  | 10.736 | 1.00 | 0.00 |
| ATOM | 1359 | HG3 | ARG | 85 | 8.092  | -7.759  | 11.353 | 1.00 | 0.00 |
| ATOM | 1360 | CD  | ARG | 85 | 8.810  | -9.200  | 12.784 | 1.00 | 0.00 |
| ATOM | 1361 | HD2 | ARG | 85 | 9.849  | -8.945  | 12.575 | 1.00 | 0.00 |
| ATOM | 1362 | HD3 | ARG | 85 | 8.481  | -8.676  | 13.682 | 1.00 | 0.00 |
| ATOM | 1363 | NE  | ARG | 85 | 8.721  | -10.639 | 13.023 | 1.00 | 0.00 |
| ATOM | 1364 | HE  | ARG | 85 | 8.734  | -11.279 | 12.242 | 1.00 | 0.00 |
| ATOM | 1365 | CZ  | ARG | 85 | 8.618  | -11.141 | 14.254 | 1.00 | 0.00 |

|      |      |      |     |    |       |         |        |      |      |
|------|------|------|-----|----|-------|---------|--------|------|------|
| ATOM | 1366 | NH1  | ARG | 85 | 8.607 | -10.351 | 15.295 | 1.00 | 0.00 |
| ATOM | 1367 | HH11 | ARG | 85 | 8.677 | -9.352  | 15.168 | 1.00 | 0.00 |
| ATOM | 1368 | HH12 | ARG | 85 | 8.529 | -10.744 | 16.223 | 1.00 | 0.00 |
| ATOM | 1369 | NH2  | ARG | 85 | 8.532 | -12.432 | 14.421 | 1.00 | 0.00 |
| ATOM | 1370 | HH21 | ARG | 85 | 8.544 | -13.044 | 13.618 | 1.00 | 0.00 |
| ATOM | 1371 | HH22 | ARG | 85 | 8.454 | -12.814 | 15.353 | 1.00 | 0.00 |
| ATOM | 1372 | C    | ARG | 85 | 5.909 | -9.265  | 9.537  | 1.00 | 0.00 |
| ATOM | 1373 | O    | ARG | 85 | 6.533 | -8.694  | 8.643  | 1.00 | 0.00 |
| ATOM | 1374 | N    | ARG | 86 | 5.482 | -10.521 | 9.439  | 1.00 | 0.00 |
| ATOM | 1375 | H    | ARG | 86 | 4.989 | -10.956 | 10.206 | 1.00 | 0.00 |
| ATOM | 1376 | CA   | ARG | 86 | 5.733 | -11.313 | 8.241  | 1.00 | 0.00 |
| ATOM | 1377 | HA   | ARG | 86 | 6.805 | -11.382 | 8.055  | 1.00 | 0.00 |
| ATOM | 1378 | CB   | ARG | 86 | 5.177 | -12.727 | 8.428  | 1.00 | 0.00 |
| ATOM | 1379 | HB2  | ARG | 86 | 4.113 | -12.673 | 8.656  | 1.00 | 0.00 |
| ATOM | 1380 | HB3  | ARG | 86 | 5.324 | -13.300 | 7.513  | 1.00 | 0.00 |
| ATOM | 1381 | CG   | ARG | 86 | 5.912 | -13.414 | 9.583  | 1.00 | 0.00 |
| ATOM | 1382 | HG2  | ARG | 86 | 6.981 | -13.432 | 9.370  | 1.00 | 0.00 |
| ATOM | 1383 | HG3  | ARG | 86 | 5.735 | -12.859 | 10.504 | 1.00 | 0.00 |
| ATOM | 1384 | CD   | ARG | 86 | 5.401 | -14.846 | 9.746  | 1.00 | 0.00 |
| ATOM | 1385 | HD2  | ARG | 86 | 4.313 | -14.848 | 9.800  | 1.00 | 0.00 |
| ATOM | 1386 | HD3  | ARG | 86 | 5.724 | -15.454 | 8.901  | 1.00 | 0.00 |
| ATOM | 1387 | NE   | ARG | 86 | 5.931 | -15.433 | 10.973 | 1.00 | 0.00 |

|      |      |      |     |    |        |         |        |      |      |
|------|------|------|-----|----|--------|---------|--------|------|------|
| ATOM | 1388 | HE   | ARG | 86 | 6.659  | -14.957 | 11.487 | 1.00 | 0.00 |
| ATOM | 1389 | CZ   | ARG | 86 | 5.475  | -16.592 | 11.443 | 1.00 | 0.00 |
| ATOM | 1390 | NH1  | ARG | 86 | 4.538  | -17.239 | 10.803 | 1.00 | 0.00 |
| ATOM | 1391 | HH11 | ARG | 86 | 4.159  | -16.858 | 9.948  | 1.00 | 0.00 |
| ATOM | 1392 | HH12 | ARG | 86 | 4.198  | -18.118 | 11.166 | 1.00 | 0.00 |
| ATOM | 1393 | NH2  | ARG | 86 | 5.968  | -17.085 | 12.545 | 1.00 | 0.00 |
| ATOM | 1394 | HH21 | ARG | 86 | 6.695  | -16.585 | 13.038 | 1.00 | 0.00 |
| ATOM | 1395 | HH22 | ARG | 86 | 5.622  | -17.965 | 12.901 | 1.00 | 0.00 |
| ATOM | 1396 | C    | ARG | 86 | 5.077  | -10.650 | 7.031  | 1.00 | 0.00 |
| ATOM | 1397 | O    | ARG | 86 | 5.631  | -10.642 | 5.931  | 1.00 | 0.00 |
| ATOM | 1398 | N    | MET | 87 | 3.885  | -10.094 | 7.259  | 1.00 | 0.00 |
| ATOM | 1399 | H    | MET | 87 | 3.477  | -10.146 | 8.182  | 1.00 | 0.00 |
| ATOM | 1400 | CA   | MET | 87 | 3.130  | -9.421  | 6.204  | 1.00 | 0.00 |
| ATOM | 1401 | HA   | MET | 87 | 2.854  | -10.136 | 5.429  | 1.00 | 0.00 |
| ATOM | 1402 | CB   | MET | 87 | 1.850  | -8.809  | 6.784  | 1.00 | 0.00 |
| ATOM | 1403 | HB2  | MET | 87 | 1.327  | -9.561  | 7.375  | 1.00 | 0.00 |
| ATOM | 1404 | HB3  | MET | 87 | 2.111  | -7.964  | 7.421  | 1.00 | 0.00 |
| ATOM | 1405 | CG   | MET | 87 | 0.942  | -8.331  | 5.646  | 1.00 | 0.00 |
| ATOM | 1406 | HG2  | MET | 87 | 1.550  | -7.919  | 4.841  | 1.00 | 0.00 |
| ATOM | 1407 | HG3  | MET | 87 | 0.358  | -9.170  | 5.267  | 1.00 | 0.00 |
| ATOM | 1408 | SD   | MET | 87 | -0.183 | -7.050  | 6.259  | 1.00 | 0.00 |
| ATOM | 1409 | CE   | MET | 87 | -1.218 | -8.105  | 7.302  | 1.00 | 0.00 |

|      |      |     |     |    |        |        |       |      |      |
|------|------|-----|-----|----|--------|--------|-------|------|------|
| ATOM | 1410 | HE1 | MET | 87 | -0.601 | -8.578 | 8.067 | 1.00 | 0.00 |
| ATOM | 1411 | HE2 | MET | 87 | -1.988 | -7.500 | 7.781 | 1.00 | 0.00 |
| ATOM | 1412 | HE3 | MET | 87 | -1.688 | -8.874 | 6.689 | 1.00 | 0.00 |
| ATOM | 1413 | C   | MET | 87 | 3.955  | -8.316 | 5.549 | 1.00 | 0.00 |
| ATOM | 1414 | O   | MET | 87 | 3.766  | -8.013 | 4.373 | 1.00 | 0.00 |
| ATOM | 1415 | N   | MET | 88 | 4.853  | -7.700 | 6.318 | 1.00 | 0.00 |
| ATOM | 1416 | H   | MET | 88 | 4.976  | -7.969 | 7.284 | 1.00 | 0.00 |
| ATOM | 1417 | CA  | MET | 88 | 5.673  | -6.612 | 5.793 | 1.00 | 0.00 |
| ATOM | 1418 | HA  | MET | 88 | 5.067  | -5.720 | 5.639 | 1.00 | 0.00 |
| ATOM | 1419 | CB  | MET | 88 | 6.779  | -6.284 | 6.796 | 1.00 | 0.00 |
| ATOM | 1420 | HB2 | MET | 88 | 7.331  | -7.193 | 7.037 | 1.00 | 0.00 |
| ATOM | 1421 | HB3 | MET | 88 | 7.459  | -5.553 | 6.359 | 1.00 | 0.00 |
| ATOM | 1422 | CG  | MET | 88 | 6.162  | -5.707 | 8.076 | 1.00 | 0.00 |
| ATOM | 1423 | HG2 | MET | 88 | 5.862  | -4.673 | 7.906 | 1.00 | 0.00 |
| ATOM | 1424 | HG3 | MET | 88 | 5.290  | -6.296 | 8.362 | 1.00 | 0.00 |
| ATOM | 1425 | SD  | MET | 88 | 7.381  | -5.761 | 9.414 | 1.00 | 0.00 |
| ATOM | 1426 | CE  | MET | 88 | 8.810  | -5.211 | 8.452 | 1.00 | 0.00 |
| ATOM | 1427 | HE1 | MET | 88 | 8.615  | -4.219 | 8.045 | 1.00 | 0.00 |
| ATOM | 1428 | HE2 | MET | 88 | 9.689  | -5.172 | 9.096 | 1.00 | 0.00 |
| ATOM | 1429 | HE3 | MET | 88 | 8.990  | -5.910 | 7.635 | 1.00 | 0.00 |
| ATOM | 1430 | C   | MET | 88 | 6.299  | -6.999 | 4.458 | 1.00 | 0.00 |
| ATOM | 1431 | O   | MET | 88 | 6.160  | -6.279 | 3.469 | 1.00 | 0.00 |



|      |      |      |     |    |        |         |       |      |      |
|------|------|------|-----|----|--------|---------|-------|------|------|
| ATOM | 1432 | N    | ARG | 89 | 6.970  | -8.146  | 4.429 | 1.00 | 0.00 |
| ATOM | 1433 | H    | ARG | 89 | 7.081  | -8.702  | 5.265 | 1.00 | 0.00 |
| ATOM | 1434 | CA   | ARG | 89 | 7.590  | -8.619  | 3.198 | 1.00 | 0.00 |
| ATOM | 1435 | HA   | ARG | 89 | 8.314  | -7.887  | 2.839 | 1.00 | 0.00 |
| ATOM | 1436 | CB   | ARG | 89 | 8.318  | -9.943  | 3.452 | 1.00 | 0.00 |
| ATOM | 1437 | HB2  | ARG | 89 | 7.613  | -10.674 | 3.848 | 1.00 | 0.00 |
| ATOM | 1438 | HB3  | ARG | 89 | 8.736  | -10.312 | 2.516 | 1.00 | 0.00 |
| ATOM | 1439 | CG   | ARG | 89 | 9.449  | -9.724  | 4.465 | 1.00 | 0.00 |
| ATOM | 1440 | HG2  | ARG | 89 | 9.057  | -9.202  | 5.338 | 1.00 | 0.00 |
| ATOM | 1441 | HG3  | ARG | 89 | 9.853  | -10.689 | 4.771 | 1.00 | 0.00 |
| ATOM | 1442 | CD   | ARG | 89 | 10.560 | -8.885  | 3.825 | 1.00 | 0.00 |
| ATOM | 1443 | HD2  | ARG | 89 | 10.911 | -9.370  | 2.914 | 1.00 | 0.00 |
| ATOM | 1444 | HD3  | ARG | 89 | 10.181 | -7.892  | 3.585 | 1.00 | 0.00 |
| ATOM | 1445 | NE   | ARG | 89 | 11.685 | -8.746  | 4.744 | 1.00 | 0.00 |
| ATOM | 1446 | HE   | ARG | 89 | 12.495 | -9.342  | 4.646 | 1.00 | 0.00 |
| ATOM | 1447 | CZ   | ARG | 89 | 11.676 | -7.842  | 5.722 | 1.00 | 0.00 |
| ATOM | 1448 | NH1  | ARG | 89 | 10.639 | -7.065  | 5.889 | 1.00 | 0.00 |
| ATOM | 1449 | HH11 | ARG | 89 | 9.843  | -7.152  | 5.274 | 1.00 | 0.00 |
| ATOM | 1450 | HH12 | ARG | 89 | 10.639 | -6.382  | 6.633 | 1.00 | 0.00 |
| ATOM | 1451 | NH2  | ARG | 89 | 12.704 | -7.734  | 6.516 | 1.00 | 0.00 |
| ATOM | 1452 | HH21 | ARG | 89 | 13.504 | -8.337  | 6.387 | 1.00 | 0.00 |
| ATOM | 1453 | HH22 | ARG | 89 | 12.696 | -7.048  | 7.258 | 1.00 | 0.00 |

|      |      |      |     |    |       |         |        |      |      |
|------|------|------|-----|----|-------|---------|--------|------|------|
| ATOM | 1454 | C    | ARG | 89 | 6.529 | -8.806  | 2.116  | 1.00 | 0.00 |
| ATOM | 1455 | O    | ARG | 89 | 6.721 | -8.412  | 0.965  | 1.00 | 0.00 |
| ATOM | 1456 | N    | LEU | 90 | 5.403 | -9.401  | 2.507  | 1.00 | 0.00 |
| ATOM | 1457 | H    | LEU | 90 | 5.305 | -9.717  | 3.461  | 1.00 | 0.00 |
| ATOM | 1458 | CA   | LEU | 90 | 4.299 | -9.634  | 1.584  | 1.00 | 0.00 |
| ATOM | 1459 | HA   | LEU | 90 | 4.633 | -10.235 | 0.738  | 1.00 | 0.00 |
| ATOM | 1460 | CB   | LEU | 90 | 3.180 | -10.390 | 2.310  | 1.00 | 0.00 |
| ATOM | 1461 | HB2  | LEU | 90 | 3.597 | -11.267 | 2.806  | 1.00 | 0.00 |
| ATOM | 1462 | HB3  | LEU | 90 | 2.735 | -9.730  | 3.055  | 1.00 | 0.00 |
| ATOM | 1463 | CG   | LEU | 90 | 2.104 | -10.831 | 1.309  | 1.00 | 0.00 |
| ATOM | 1464 | HG   | LEU | 90 | 2.562 | -11.005 | 0.336  | 1.00 | 0.00 |
| ATOM | 1465 | CD1  | LEU | 90 | 1.448 | -12.124 | 1.802  | 1.00 | 0.00 |
| ATOM | 1466 | HD11 | LEU | 90 | 0.990 | -11.951 | 2.776  | 1.00 | 0.00 |
| ATOM | 1467 | HD12 | LEU | 90 | 0.684 | -12.438 | 1.092  | 1.00 | 0.00 |
| ATOM | 1468 | HD13 | LEU | 90 | 2.204 | -12.905 | 1.891  | 1.00 | 0.00 |
| ATOM | 1469 | CD2  | LEU | 90 | 1.034 | -9.739  | 1.190  | 1.00 | 0.00 |
| ATOM | 1470 | HD21 | LEU | 90 | 1.495 | -8.815  | 0.843  | 1.00 | 0.00 |
| ATOM | 1471 | HD22 | LEU | 90 | 0.271 | -10.054 | 0.479  | 1.00 | 0.00 |
| ATOM | 1472 | HD23 | LEU | 90 | 0.575 | -9.572  | 2.165  | 1.00 | 0.00 |
| ATOM | 1473 | C    | LEU | 90 | 3.764 | -8.311  | 1.046  | 1.00 | 0.00 |
| ATOM | 1474 | O    | LEU | 90 | 3.439 | -8.195  | -0.136 | 1.00 | 0.00 |
| ATOM | 1475 | N    | ALA | 91 | 3.669 | -7.320  | 1.929  | 1.00 | 0.00 |

|      |      |     |     |    |        |        |        |      |      |
|------|------|-----|-----|----|--------|--------|--------|------|------|
| ATOM | 1476 | H   | ALA | 91 | 3.930  | -7.470 | 2.894  | 1.00 | 0.00 |
| ATOM | 1477 | CA  | ALA | 91 | 3.164  | -6.008 | 1.545  | 1.00 | 0.00 |
| ATOM | 1478 | HA  | ALA | 91 | 2.124  | -6.083 | 1.228  | 1.00 | 0.00 |
| ATOM | 1479 | CB  | ALA | 91 | 3.245  | -5.048 | 2.735  | 1.00 | 0.00 |
| ATOM | 1480 | HB1 | ALA | 91 | 4.282  | -4.956 | 3.059  | 1.00 | 0.00 |
| ATOM | 1481 | HB2 | ALA | 91 | 2.870  | -4.069 | 2.439  | 1.00 | 0.00 |
| ATOM | 1482 | HB3 | ALA | 91 | 2.642  | -5.435 | 3.557  | 1.00 | 0.00 |
| ATOM | 1483 | C   | ALA | 91 | 3.966  | -5.449 | 0.378  | 1.00 | 0.00 |
| ATOM | 1484 | O   | ALA | 91 | 3.399  | -5.046 | -0.631 | 1.00 | 0.00 |
| ATOM | 1485 | N   | GLU | 92 | 5.288  | -5.437 | 0.526  | 1.00 | 0.00 |
| ATOM | 1486 | H   | GLU | 92 | 5.701  | -5.758 | 1.390  | 1.00 | 0.00 |
| ATOM | 1487 | CA  | GLU | 92 | 6.176  | -4.937 | -0.523 | 1.00 | 0.00 |
| ATOM | 1488 | HA  | GLU | 92 | 5.941  | -3.898 | -0.752 | 1.00 | 0.00 |
| ATOM | 1489 | CB  | GLU | 92 | 7.630  | -5.016 | -0.049 | 1.00 | 0.00 |
| ATOM | 1490 | HB2 | GLU | 92 | 7.723  | -4.514 | 0.914  | 1.00 | 0.00 |
| ATOM | 1491 | HB3 | GLU | 92 | 7.919  | -6.062 | 0.058  | 1.00 | 0.00 |
| ATOM | 1492 | CG  | GLU | 92 | 8.549  | -4.334 | -1.072 | 1.00 | 0.00 |
| ATOM | 1493 | HG2 | GLU | 92 | 8.397  | -4.797 | -2.047 | 1.00 | 0.00 |
| ATOM | 1494 | HG3 | GLU | 92 | 8.290  | -3.277 | -1.127 | 1.00 | 0.00 |
| ATOM | 1495 | CD  | GLU | 92 | 10.016 | -4.478 | -0.663 | 1.00 | 0.00 |
| ATOM | 1496 | OE1 | GLU | 92 | 10.279 | -5.114 | 0.348  | 1.00 | 0.00 |
| ATOM | 1497 | OE2 | GLU | 92 | 10.858 | -3.950 | -1.369 | 1.00 | 0.00 |

|      |      |      |     |    |       |         |        |      |      |
|------|------|------|-----|----|-------|---------|--------|------|------|
| ATOM | 1498 | C    | GLU | 92 | 6.008 | -5.739  | -1.813 | 1.00 | 0.00 |
| ATOM | 1499 | O    | GLU | 92 | 6.201 | -5.212  | -2.908 | 1.00 | 0.00 |
| ATOM | 1500 | N    | ASN | 93 | 5.664 | -7.017  | -1.674 | 1.00 | 0.00 |
| ATOM | 1501 | H    | ASN | 93 | 5.539 | -7.416  | -0.754 | 1.00 | 0.00 |
| ATOM | 1502 | CA   | ASN | 93 | 5.492 | -7.888  | -2.837 | 1.00 | 0.00 |
| ATOM | 1503 | HA   | ASN | 93 | 6.354 | -7.802  | -3.499 | 1.00 | 0.00 |
| ATOM | 1504 | CB   | ASN | 93 | 5.365 | -9.347  | -2.385 | 1.00 | 0.00 |
| ATOM | 1505 | HB2  | ASN | 93 | 4.543 | -9.445  | -1.676 | 1.00 | 0.00 |
| ATOM | 1506 | HB3  | ASN | 93 | 5.180 | -9.989  | -3.246 | 1.00 | 0.00 |
| ATOM | 1507 | CG   | ASN | 93 | 6.654 | -9.805  | -1.703 | 1.00 | 0.00 |
| ATOM | 1508 | OD1  | ASN | 93 | 7.669 | -8.989  | -1.615 | 1.00 | 0.00 |
| ATOM | 1509 | ND2  | ASN | 93 | 6.736 | -10.942 | -1.238 | 1.00 | 0.00 |
| ATOM | 1510 | HD21 | ASN | 93 | 7.590 | -11.240 | -0.788 | 1.00 | 0.00 |
| ATOM | 1511 | HD22 | ASN | 93 | 5.949 | -11.571 | -1.308 | 1.00 | 0.00 |
| ATOM | 1512 | C    | ASN | 93 | 4.257 | -7.498  | -3.650 | 1.00 | 0.00 |
| ATOM | 1513 | O    | ASN | 93 | 4.258 | -7.611  | -4.876 | 1.00 | 0.00 |
| ATOM | 1514 | N    | ILE | 94 | 3.205 | -7.046  | -2.967 | 1.00 | 0.00 |
| ATOM | 1515 | H    | ILE | 94 | 3.227 | -7.004  | -1.958 | 1.00 | 0.00 |
| ATOM | 1516 | CA   | ILE | 94 | 1.973 | -6.654  | -3.651 | 1.00 | 0.00 |
| ATOM | 1517 | HA   | ILE | 94 | 1.524 | -7.533  | -4.114 | 1.00 | 0.00 |
| ATOM | 1518 | CB   | ILE | 94 | 0.985 | -6.044  | -2.644 | 1.00 | 0.00 |
| ATOM | 1519 | HB   | ILE | 94 | 1.533 | -5.416  | -1.941 | 1.00 | 0.00 |

|      |      |          |    |        |        |        |      |      |
|------|------|----------|----|--------|--------|--------|------|------|
| ATOM | 1520 | CG2 ILE  | 94 | -0.063 | -5.197 | -3.377 | 1.00 | 0.00 |
| ATOM | 1521 | HG21 ILE | 94 | -0.611 | -5.825 | -4.079 | 1.00 | 0.00 |
| ATOM | 1522 | HG22 ILE | 94 | -0.757 | -4.771 | -2.653 | 1.00 | 0.00 |
| ATOM | 1523 | HG23 ILE | 94 | 0.434  | -4.394 | -3.920 | 1.00 | 0.00 |
| ATOM | 1524 | CG1 ILE  | 94 | 0.281  | -7.175 | -1.882 | 1.00 | 0.00 |
| ATOM | 1525 | HG12 ILE | 94 | -0.507 | -7.596 | -2.506 | 1.00 | 0.00 |
| ATOM | 1526 | HG13 ILE | 94 | 1.006  | -7.953 | -1.638 | 1.00 | 0.00 |
| ATOM | 1527 | CD1 ILE  | 94 | -0.331 | -6.625 | -0.590 | 1.00 | 0.00 |
| ATOM | 1528 | HD11 ILE | 94 | -1.055 | -5.848 | -0.832 | 1.00 | 0.00 |
| ATOM | 1529 | HD12 ILE | 94 | -0.830 | -7.431 | -0.052 | 1.00 | 0.00 |
| ATOM | 1530 | HD13 ILE | 94 | 0.457  | -6.205 | 0.036  | 1.00 | 0.00 |
| ATOM | 1531 | C ILE    | 94 | 2.269  | -5.663 | -4.785 | 1.00 | 0.00 |
| ATOM | 1532 | O ILE    | 94 | 1.916  | -5.913 | -5.937 | 1.00 | 0.00 |
| ATOM | 1533 | N PRO    | 95 | 2.909  | -4.558 | -4.489 | 1.00 | 0.00 |
| ATOM | 1534 | CD PRO   | 95 | 3.365  | -4.162 | -3.148 | 1.00 | 0.00 |
| ATOM | 1535 | HD2 PRO  | 95 | 3.936  | -4.981 | -2.710 | 1.00 | 0.00 |
| ATOM | 1536 | HD3 PRO  | 95 | 2.496  | -3.952 | -2.524 | 1.00 | 0.00 |
| ATOM | 1537 | CG PRO   | 95 | 4.217  | -2.921 | -3.396 | 1.00 | 0.00 |
| ATOM | 1538 | HG2 PRO  | 95 | 5.267  | -3.210 | -3.457 | 1.00 | 0.00 |
| ATOM | 1539 | HG3 PRO  | 95 | 4.082  | -2.219 | -2.573 | 1.00 | 0.00 |
| ATOM | 1540 | CB PRO   | 95 | 3.738  | -2.336 | -4.678 | 1.00 | 0.00 |
| ATOM | 1541 | HB2 PRO  | 95 | 4.568  | -1.842 | -5.182 | 1.00 | 0.00 |

|      |      |     |     |    |       |        |        |      |      |
|------|------|-----|-----|----|-------|--------|--------|------|------|
| ATOM | 1542 | HB3 | PRO | 95 | 2.923 | -1.627 | -4.539 | 1.00 | 0.00 |
| ATOM | 1543 | CA  | PRO | 95 | 3.258 | -3.527 | -5.511 | 1.00 | 0.00 |
| ATOM | 1544 | HA  | PRO | 95 | 2.355 | -3.299 | -6.077 | 1.00 | 0.00 |
| ATOM | 1545 | C   | PRO | 95 | 4.356 | -3.991 | -6.470 | 1.00 | 0.00 |
| ATOM | 1546 | O   | PRO | 95 | 4.451 | -3.496 | -7.589 | 1.00 | 0.00 |
| ATOM | 1547 | N   | SER | 96 | 5.175 | -4.951 | -6.030 | 1.00 | 0.00 |
| ATOM | 1548 | H   | SER | 96 | 5.069 | -5.325 | -5.098 | 1.00 | 0.00 |
| ATOM | 1549 | CA  | SER | 96 | 6.250 | -5.477 | -6.870 | 1.00 | 0.00 |
| ATOM | 1550 | HA  | SER | 96 | 6.911 | -4.665 | -7.173 | 1.00 | 0.00 |
| ATOM | 1551 | CB  | SER | 96 | 7.072 | -6.517 | -6.106 | 1.00 | 0.00 |
| ATOM | 1552 | HB2 | SER | 96 | 6.431 | -7.352 | -5.822 | 1.00 | 0.00 |
| ATOM | 1553 | HB3 | SER | 96 | 7.881 | -6.880 | -6.740 | 1.00 | 0.00 |
| ATOM | 1554 | OG  | SER | 96 | 7.617 | -5.921 | -4.938 | 1.00 | 0.00 |
| ATOM | 1555 | HG  | SER | 96 | 8.133 | -6.573 | -4.457 | 1.00 | 0.00 |
| ATOM | 1556 | C   | SER | 96 | 5.637 | -6.107 | -8.093 | 1.00 | 0.00 |
| ATOM | 1557 | O   | SER | 96 | 6.113 | -5.957 | -9.219 | 1.00 | 0.00 |
| ATOM | 1558 | N   | ARG | 97 | 4.556 | -6.806 | -7.824 | 1.00 | 0.00 |
| ATOM | 1559 | H   | ARG | 97 | 4.255 | -6.885 | -6.863 | 1.00 | 0.00 |
| ATOM | 1560 | CA  | ARG | 97 | 3.794 | -7.489 | -8.836 | 1.00 | 0.00 |
| ATOM | 1561 | HA  | ARG | 97 | 4.386 | -8.270 | -9.314 | 1.00 | 0.00 |
| ATOM | 1562 | CB  | ARG | 97 | 2.595 | -8.136 | -8.155 | 1.00 | 0.00 |
| ATOM | 1563 | HB2 | ARG | 97 | 2.136 | -7.420 | -7.474 | 1.00 | 0.00 |

|      |      |      |     |    |        |         |         |      |      |
|------|------|------|-----|----|--------|---------|---------|------|------|
| ATOM | 1564 | HB3  | ARG | 97 | 1.869  | -8.435  | -8.910  | 1.00 | 0.00 |
| ATOM | 1565 | CG   | ARG | 97 | 3.050  | -9.370  | -7.367  | 1.00 | 0.00 |
| ATOM | 1566 | HG2  | ARG | 97 | 3.589  | -10.045 | -8.032  | 1.00 | 0.00 |
| ATOM | 1567 | HG3  | ARG | 97 | 3.709  | -9.058  | -6.556  | 1.00 | 0.00 |
| ATOM | 1568 | CD   | ARG | 97 | 1.833  | -10.093 | -6.785  | 1.00 | 0.00 |
| ATOM | 1569 | HD2  | ARG | 97 | 1.194  | -10.450 | -7.593  | 1.00 | 0.00 |
| ATOM | 1570 | HD3  | ARG | 97 | 2.160  | -10.939 | -6.180  | 1.00 | 0.00 |
| ATOM | 1571 | NE   | ARG | 97 | 1.058  | -9.186  | -5.941  | 1.00 | 0.00 |
| ATOM | 1572 | HE   | ARG | 97 | 1.325  | -9.046  | -4.977  | 1.00 | 0.00 |
| ATOM | 1573 | CZ   | ARG | 97 | -0.003 | -8.530  | -6.409  | 1.00 | 0.00 |
| ATOM | 1574 | NH1  | ARG | 97 | -0.389 | -8.691  | -7.647  | 1.00 | 0.00 |
| ATOM | 1575 | HH11 | ARG | 97 | 0.121  | -9.317  | -8.254  | 1.00 | 0.00 |
| ATOM | 1576 | HH12 | ARG | 97 | -1.194 | -8.189  | -7.991  | 1.00 | 0.00 |
| ATOM | 1577 | NH2  | ARG | 97 | -0.660 | -7.721  | -5.626  | 1.00 | 0.00 |
| ATOM | 1578 | HH21 | ARG | 97 | -0.361 | -7.596  | -4.669  | 1.00 | 0.00 |
| ATOM | 1579 | HH22 | ARG | 97 | -1.464 | -7.223  | -5.979  | 1.00 | 0.00 |
| ATOM | 1580 | C    | ARG | 97 | 3.329  | -6.532  | -9.933  | 1.00 | 0.00 |
| ATOM | 1581 | O    | ARG | 97 | 3.273  | -6.906  | -11.105 | 1.00 | 0.00 |
| ATOM | 1582 | N    | CYX | 98 | 3.006  | -5.297  | -9.550  | 1.00 | 0.00 |
| ATOM | 1583 | H    | CYX | 98 | 3.070  | -5.029  | -8.578  | 1.00 | 0.00 |
| ATOM | 1584 | CA   | CYX | 98 | 2.559  | -4.302  | -10.512 | 1.00 | 0.00 |
| ATOM | 1585 | HA   | CYX | 98 | 2.244  | -4.800  | -11.429 | 1.00 | 0.00 |

|      |      |      |     |     |       |        |         |      |      |
|------|------|------|-----|-----|-------|--------|---------|------|------|
| ATOM | 1586 | CB   | CYX | 98  | 1.383 | -3.495 | -9.965  | 1.00 | 0.00 |
| ATOM | 1587 | HB2  | CYX | 98  | 1.749 | -2.558 | -9.545  | 1.00 | 0.00 |
| ATOM | 1588 | HB3  | CYX | 98  | 0.682 | -3.282 | -10.771 | 1.00 | 0.00 |
| ATOM | 1589 | SG   | CYX | 98  | 0.554 | -4.429 | -8.652  | 1.00 | 0.00 |
| ATOM | 1590 | C    | CYX | 98  | 3.679 | -3.343 | -10.826 | 1.00 | 0.00 |
| ATOM | 1591 | O    | CYX | 98  | 3.562 | -2.527 | -11.740 | 1.00 | 0.00 |
| ATOM | 1592 | N    | ASN | 99  | 4.752 | -3.409 | -10.044 | 1.00 | 0.00 |
| ATOM | 1593 | H    | ASN | 99  | 4.801 | -4.040 | -9.256  | 1.00 | 0.00 |
| ATOM | 1594 | CA   | ASN | 99  | 5.847 | -2.492 | -10.255 | 1.00 | 0.00 |
| ATOM | 1595 | HA   | ASN | 99  | 5.466 | -1.478 | -10.135 | 1.00 | 0.00 |
| ATOM | 1596 | CB   | ASN | 99  | 7.004 | -2.687 | -9.306  | 1.00 | 0.00 |
| ATOM | 1597 | HB2  | ASN | 99  | 7.139 | -3.744 | -9.077  | 1.00 | 0.00 |
| ATOM | 1598 | HB3  | ASN | 99  | 7.919 | -2.292 | -9.748  | 1.00 | 0.00 |
| ATOM | 1599 | CG   | ASN | 99  | 6.728 | -1.939 | -8.007  | 1.00 | 0.00 |
| ATOM | 1600 | OD1  | ASN | 99  | 7.024 | -2.436 | -6.921  | 1.00 | 0.00 |
| ATOM | 1601 | ND2  | ASN | 99  | 6.178 | -0.755 | -8.062  | 1.00 | 0.00 |
| ATOM | 1602 | HD21 | ASN | 99  | 5.990 | -0.249 | -7.208  | 1.00 | 0.00 |
| ATOM | 1603 | HD22 | ASN | 99  | 5.944 | -0.352 | -8.957  | 1.00 | 0.00 |
| ATOM | 1604 | C    | ASN | 99  | 6.343 | -2.553 | -11.666 | 1.00 | 0.00 |
| ATOM | 1605 | O    | ASN | 99  | 6.171 | -3.539 | -12.386 | 1.00 | 0.00 |
| ATOM | 1606 | N    | LEU | 100 | 6.872 | -1.428 | -12.061 | 1.00 | 0.00 |
| ATOM | 1607 | H    | LEU | 100 | 6.974 | -0.669 | -11.402 | 1.00 | 0.00 |



|      |      |      |     |     |        |        |         |      |      |
|------|------|------|-----|-----|--------|--------|---------|------|------|
| ATOM | 1608 | CA   | LEU | 100 | 7.319  | -1.223 | -13.413 | 1.00 | 0.00 |
| ATOM | 1609 | HA   | LEU | 100 | 7.647  | -2.153 | -13.877 | 1.00 | 0.00 |
| ATOM | 1610 | CB   | LEU | 100 | 6.109  | -0.688 | -14.188 | 1.00 | 0.00 |
| ATOM | 1611 | HB2  | LEU | 100 | 6.425  | 0.182  | -14.763 | 1.00 | 0.00 |
| ATOM | 1612 | HB3  | LEU | 100 | 5.710  | -1.445 | -14.863 | 1.00 | 0.00 |
| ATOM | 1613 | CG   | LEU | 100 | 5.009  | -0.267 | -13.175 | 1.00 | 0.00 |
| ATOM | 1614 | HG   | LEU | 100 | 5.010  | -0.960 | -12.333 | 1.00 | 0.00 |
| ATOM | 1615 | CD1  | LEU | 100 | 5.284  | 1.149  | -12.669 | 1.00 | 0.00 |
| ATOM | 1616 | HD11 | LEU | 100 | 5.283  | 1.842  | -13.510 | 1.00 | 0.00 |
| ATOM | 1617 | HD12 | LEU | 100 | 4.510  | 1.438  | -11.959 | 1.00 | 0.00 |
| ATOM | 1618 | HD13 | LEU | 100 | 6.256  | 1.177  | -12.176 | 1.00 | 0.00 |
| ATOM | 1619 | CD2  | LEU | 100 | 3.638  | -0.334 | -13.831 | 1.00 | 0.00 |
| ATOM | 1620 | HD21 | LEU | 100 | 3.444  | -1.354 | -14.165 | 1.00 | 0.00 |
| ATOM | 1621 | HD22 | LEU | 100 | 2.876  | -0.037 | -13.111 | 1.00 | 0.00 |
| ATOM | 1622 | HD23 | LEU | 100 | 3.611  | 0.340  | -14.687 | 1.00 | 0.00 |
| ATOM | 1623 | C    | LEU | 100 | 8.468  | -0.220 | -13.443 | 1.00 | 0.00 |
| ATOM | 1624 | O    | LEU | 100 | 8.442  | 0.774  | -12.720 | 1.00 | 0.00 |
| ATOM | 1625 | N    | SER | 101 | 9.472  | -0.501 | -14.277 | 1.00 | 0.00 |
| ATOM | 1626 | H    | SER | 101 | 9.438  | -1.345 | -14.831 | 1.00 | 0.00 |
| ATOM | 1627 | CA   | SER | 101 | 10.648 | 0.365  | -14.402 | 1.00 | 0.00 |
| ATOM | 1628 | HA   | SER | 101 | 11.385 | 0.112  | -13.639 | 1.00 | 0.00 |
| ATOM | 1629 | CB   | SER | 101 | 11.285 | 0.173  | -15.780 | 1.00 | 0.00 |

|      |      |     |     |     |        |        |         |      |      |
|------|------|-----|-----|-----|--------|--------|---------|------|------|
| ATOM | 1630 | HB2 | SER | 101 | 11.572 | -0.871 | -15.907 | 1.00 | 0.00 |
| ATOM | 1631 | HB3 | SER | 101 | 10.570 | 0.450  | -16.554 | 1.00 | 0.00 |
| ATOM | 1632 | OG  | SER | 101 | 12.439 | 0.997  | -15.884 | 1.00 | 0.00 |
| ATOM | 1633 | HG  | SER | 101 | 12.841 | 0.878  | -16.748 | 1.00 | 0.00 |
| ATOM | 1634 | C   | SER | 101 | 10.271 | 1.834  | -14.214 | 1.00 | 0.00 |
| ATOM | 1635 | O   | SER | 101 | 9.822  | 2.498  | -15.149 | 1.00 | 0.00 |
| ATOM | 1636 | N   | PRO | 102 | 10.442 | 2.343  | -13.019 | 1.00 | 0.00 |
| ATOM | 1637 | CD  | PRO | 102 | 10.956 | 1.637  | -11.849 | 1.00 | 0.00 |
| ATOM | 1638 | HD2 | PRO | 102 | 12.031 | 1.795  | -11.755 | 1.00 | 0.00 |
| ATOM | 1639 | HD3 | PRO | 102 | 10.753 | 0.569  | -11.934 | 1.00 | 0.00 |
| ATOM | 1640 | CG  | PRO | 102 | 10.169 | 2.289  | -10.724 | 1.00 | 0.00 |
| ATOM | 1641 | HG2 | PRO | 102 | 10.752 | 2.241  | -9.804  | 1.00 | 0.00 |
| ATOM | 1642 | HG3 | PRO | 102 | 9.229  | 1.754  | -10.586 | 1.00 | 0.00 |
| ATOM | 1643 | CB  | PRO | 102 | 9.921  | 3.711  | -11.144 | 1.00 | 0.00 |
| ATOM | 1644 | HB2 | PRO | 102 | 10.664 | 4.343  | -10.657 | 1.00 | 0.00 |
| ATOM | 1645 | HB3 | PRO | 102 | 8.922  | 4.063  | -10.889 | 1.00 | 0.00 |
| ATOM | 1646 | CA  | PRO | 102 | 10.119 | 3.751  | -12.673 | 1.00 | 0.00 |
| ATOM | 1647 | HA  | PRO | 102 | 9.208  | 4.033  | -13.200 | 1.00 | 0.00 |
| ATOM | 1648 | C   | PRO | 102 | 11.246 | 4.703  | -13.061 | 1.00 | 0.00 |
| ATOM | 1649 | O   | PRO | 102 | 12.364 | 4.591  | -12.554 | 1.00 | 0.00 |
| ATOM | 1650 | N   | MET | 103 | 10.950 | 5.635  | -13.963 | 1.00 | 0.00 |
| ATOM | 1651 | H   | MET | 103 | 10.027 | 5.686  | -14.370 | 1.00 | 0.00 |

|      |      |     |     |     |        |        |         |      |      |
|------|------|-----|-----|-----|--------|--------|---------|------|------|
| ATOM | 1652 | CA  | MET | 103 | 11.955 | 6.592  | -14.407 | 1.00 | 0.00 |
| ATOM | 1653 | HA  | MET | 103 | 12.860 | 6.068  | -14.715 | 1.00 | 0.00 |
| ATOM | 1654 | CB  | MET | 103 | 11.422 | 7.393  | -15.600 | 1.00 | 0.00 |
| ATOM | 1655 | HB2 | MET | 103 | 10.496 | 7.891  | -15.315 | 1.00 | 0.00 |
| ATOM | 1656 | HB3 | MET | 103 | 12.161 | 8.139  | -15.892 | 1.00 | 0.00 |
| ATOM | 1657 | CG  | MET | 103 | 11.153 | 6.451  | -16.779 | 1.00 | 0.00 |
| ATOM | 1658 | HG2 | MET | 103 | 10.366 | 5.746  | -16.511 | 1.00 | 0.00 |
| ATOM | 1659 | HG3 | MET | 103 | 10.840 | 7.031  | -17.646 | 1.00 | 0.00 |
| ATOM | 1660 | SD  | MET | 103 | 12.660 | 5.534  | -17.189 | 1.00 | 0.00 |
| ATOM | 1661 | CE  | MET | 103 | 13.676 | 6.951  | -17.676 | 1.00 | 0.00 |
| ATOM | 1662 | HE1 | MET | 103 | 13.769 | 7.638  | -16.835 | 1.00 | 0.00 |
| ATOM | 1663 | HE2 | MET | 103 | 14.666 | 6.604  | -17.972 | 1.00 | 0.00 |
| ATOM | 1664 | HE3 | MET | 103 | 13.206 | 7.464  | -18.514 | 1.00 | 0.00 |
| ATOM | 1665 | C   | MET | 103 | 12.323 | 7.545  | -13.275 | 1.00 | 0.00 |
| ATOM | 1666 | O   | MET | 103 | 13.489 | 7.637  | -12.886 | 1.00 | 0.00 |
| ATOM | 1667 | N   | ARG | 104 | 11.322 | 8.245  | -12.744 | 1.00 | 0.00 |
| ATOM | 1668 | H   | ARG | 104 | 10.383 | 8.152  | -13.103 | 1.00 | 0.00 |
| ATOM | 1669 | CA  | ARG | 104 | 11.554 | 9.180  | -11.647 | 1.00 | 0.00 |
| ATOM | 1670 | HA  | ARG | 104 | 12.375 | 8.829  | -11.022 | 1.00 | 0.00 |
| ATOM | 1671 | CB  | ARG | 104 | 11.921 | 10.560 | -12.209 | 1.00 | 0.00 |
| ATOM | 1672 | HB2 | ARG | 104 | 11.621 | 10.612 | -13.255 | 1.00 | 0.00 |
| ATOM | 1673 | HB3 | ARG | 104 | 11.397 | 11.329 | -11.642 | 1.00 | 0.00 |

|      |      |      |     |     |        |        |         |      |      |
|------|------|------|-----|-----|--------|--------|---------|------|------|
| ATOM | 1674 | CG   | ARG | 104 | 13.435 | 10.786 | -12.099 | 1.00 | 0.00 |
| ATOM | 1675 | HG2  | ARG | 104 | 13.957 | 9.970  | -12.600 | 1.00 | 0.00 |
| ATOM | 1676 | HG3  | ARG | 104 | 13.693 | 11.730 | -12.578 | 1.00 | 0.00 |
| ATOM | 1677 | CD   | ARG | 104 | 13.854 | 10.831 | -10.624 | 1.00 | 0.00 |
| ATOM | 1678 | HD2  | ARG | 104 | 14.029 | 9.818  | -10.261 | 1.00 | 0.00 |
| ATOM | 1679 | HD3  | ARG | 104 | 14.768 | 11.416 | -10.519 | 1.00 | 0.00 |
| ATOM | 1680 | NE   | ARG | 104 | 12.808 | 11.446 | -9.810  | 1.00 | 0.00 |
| ATOM | 1681 | HE   | ARG | 104 | 12.206 | 10.866 | -9.243  | 1.00 | 0.00 |
| ATOM | 1682 | CZ   | ARG | 104 | 12.620 | 12.764 | -9.793  | 1.00 | 0.00 |
| ATOM | 1683 | NH1  | ARG | 104 | 13.383 | 13.546 | -10.509 | 1.00 | 0.00 |
| ATOM | 1684 | HH11 | ARG | 104 | 14.118 | 13.148 | -11.076 | 1.00 | 0.00 |
| ATOM | 1685 | HH12 | ARG | 104 | 13.235 | 14.545 | -10.491 | 1.00 | 0.00 |
| ATOM | 1686 | NH2  | ARG | 104 | 11.673 | 13.275 | -9.058  | 1.00 | 0.00 |
| ATOM | 1687 | HH21 | ARG | 104 | 11.085 | 12.668 | -8.504  | 1.00 | 0.00 |
| ATOM | 1688 | HH22 | ARG | 104 | 11.532 | 14.275 | -9.046  | 1.00 | 0.00 |
| ATOM | 1689 | C    | ARG | 104 | 10.316 | 9.309  | -10.761 | 1.00 | 0.00 |
| ATOM | 1690 | O    | ARG | 104 | 9.191  | 9.366  | -11.257 | 1.00 | 0.00 |
| ATOM | 1691 | N    | CYX | 105 | 10.541 | 9.386  | -9.450  | 1.00 | 0.00 |
| ATOM | 1692 | H    | CYX | 105 | 11.483 | 9.318  | -9.091  | 1.00 | 0.00 |
| ATOM | 1693 | CA   | CYX | 105 | 9.447  | 9.546  | -8.496  | 1.00 | 0.00 |
| ATOM | 1694 | HA   | CYX | 105 | 8.494  | 9.374  | -8.995  | 1.00 | 0.00 |
| ATOM | 1695 | CB   | CYX | 105 | 9.586  | 8.542  | -7.349  | 1.00 | 0.00 |

|      |      |     |     |     |        |        |         |      |      |
|------|------|-----|-----|-----|--------|--------|---------|------|------|
| ATOM | 1696 | HB2 | CYX | 105 | 10.622 | 8.518  | -7.010  | 1.00 | 0.00 |
| ATOM | 1697 | HB3 | CYX | 105 | 8.941  | 8.841  | -6.523  | 1.00 | 0.00 |
| ATOM | 1698 | SG  | CYX | 105 | 9.127  | 6.888  | -7.929  | 1.00 | 0.00 |
| ATOM | 1699 | C   | CYX | 105 | 9.453  | 10.970 | -7.938  | 1.00 | 0.00 |
| ATOM | 1700 | O   | CYX | 105 | 10.362 | 11.342 | -7.196  | 1.00 | 0.00 |
| ATOM | 1701 | N   | PRO | 106 | 8.470  | 11.770 | -8.280  | 1.00 | 0.00 |
| ATOM | 1702 | CD  | PRO | 106 | 7.352  | 11.423 | -9.169  | 1.00 | 0.00 |
| ATOM | 1703 | HD2 | PRO | 106 | 6.660  | 10.770 | -8.636  | 1.00 | 0.00 |
| ATOM | 1704 | HD3 | PRO | 106 | 7.739  | 10.903 | -10.045 | 1.00 | 0.00 |
| ATOM | 1705 | CG  | PRO | 106 | 6.731  | 12.776 | -9.520  | 1.00 | 0.00 |
| ATOM | 1706 | HG2 | PRO | 106 | 5.652  | 12.657 | -9.616  | 1.00 | 0.00 |
| ATOM | 1707 | HG3 | PRO | 106 | 7.144  | 13.121 | -10.468 | 1.00 | 0.00 |
| ATOM | 1708 | CB  | PRO | 106 | 7.080  | 13.716 | -8.413  | 1.00 | 0.00 |
| ATOM | 1709 | HB2 | PRO | 106 | 6.286  | 13.719 | -7.666  | 1.00 | 0.00 |
| ATOM | 1710 | HB3 | PRO | 106 | 7.235  | 14.730 | -8.782  | 1.00 | 0.00 |
| ATOM | 1711 | CA  | PRO | 106 | 8.373  | 13.183 | -7.795  | 1.00 | 0.00 |
| ATOM | 1712 | HA  | PRO | 106 | 9.245  | 13.719 | -8.169  | 1.00 | 0.00 |
| ATOM | 1713 | C   | PRO | 106 | 8.320  | 13.297 | -6.277  | 1.00 | 0.00 |
| ATOM | 1714 | O   | PRO | 106 | 8.143  | 14.387 | -5.736  | 1.00 | 0.00 |
| ATOM | 1715 | N   | MET | 107 | 8.474  | 12.174 | -5.599  | 1.00 | 0.00 |
| ATOM | 1716 | H   | MET | 107 | 8.632  | 11.301 | -6.082  | 1.00 | 0.00 |
| ATOM | 1717 | CA  | MET | 107 | 8.442  | 12.161 | -4.148  | 1.00 | 0.00 |

|      |      |     |     |     |        |        |        |      |      |
|------|------|-----|-----|-----|--------|--------|--------|------|------|
| ATOM | 1718 | HA  | MET | 107 | 7.615  | 12.767 | -3.778 | 1.00 | 0.00 |
| ATOM | 1719 | CB  | MET | 107 | 8.250  | 10.743 | -3.673 | 1.00 | 0.00 |
| ATOM | 1720 | HB2 | MET | 107 | 8.856  | 10.077 | -4.287 | 1.00 | 0.00 |
| ATOM | 1721 | HB3 | MET | 107 | 8.571  | 10.669 | -2.634 | 1.00 | 0.00 |
| ATOM | 1722 | CG  | MET | 107 | 6.775  | 10.338 | -3.782 | 1.00 | 0.00 |
| ATOM | 1723 | HG2 | MET | 107 | 6.696  | 9.404  | -4.339 | 1.00 | 0.00 |
| ATOM | 1724 | HG3 | MET | 107 | 6.363  | 10.200 | -2.782 | 1.00 | 0.00 |
| ATOM | 1725 | SD  | MET | 107 | 5.834  | 11.627 | -4.643 | 1.00 | 0.00 |
| ATOM | 1726 | CE  | MET | 107 | 5.811  | 10.853 | -6.277 | 1.00 | 0.00 |
| ATOM | 1727 | HE1 | MET | 107 | 5.316  | 9.884  | -6.214 | 1.00 | 0.00 |
| ATOM | 1728 | HE2 | MET | 107 | 5.271  | 11.492 | -6.975 | 1.00 | 0.00 |
| ATOM | 1729 | HE3 | MET | 107 | 6.834  | 10.715 | -6.628 | 1.00 | 0.00 |
| ATOM | 1730 | C   | MET | 107 | 9.749  | 12.683 | -3.597 | 1.00 | 0.00 |
| ATOM | 1731 | O   | MET | 107 | 10.698 | 11.930 | -3.370 | 1.00 | 0.00 |
| ATOM | 1732 | N   | GLY | 108 | 9.783  | 13.979 | -3.390 | 1.00 | 0.00 |
| ATOM | 1733 | H   | GLY | 108 | 8.975  | 14.549 | -3.595 | 1.00 | 0.00 |
| ATOM | 1734 | CA  | GLY | 108 | 10.966 | 14.628 | -2.867 | 1.00 | 0.00 |
| ATOM | 1735 | HA2 | GLY | 108 | 10.702 | 15.624 | -2.513 | 1.00 | 0.00 |
| ATOM | 1736 | HA3 | GLY | 108 | 11.361 | 14.041 | -2.037 | 1.00 | 0.00 |
| ATOM | 1737 | C   | GLY | 108 | 12.040 | 14.752 | -3.942 | 1.00 | 0.00 |
| ATOM | 1738 | O   | GLY | 108 | 13.232 | 14.808 | -3.638 | 1.00 | 0.00 |
| ATOM | 1739 | N   | GLY | 109 | 11.603 | 14.801 | -5.199 | 1.00 | 0.00 |

|      |      |     |     |     |        |        |        |      |      |
|------|------|-----|-----|-----|--------|--------|--------|------|------|
| ATOM | 1740 | H   | GLY | 109 | 10.614 | 14.750 | -5.396 | 1.00 | 0.00 |
| ATOM | 1741 | CA  | GLY | 109 | 12.528 | 14.928 | -6.322 | 1.00 | 0.00 |
| ATOM | 1742 | HA2 | GLY | 109 | 11.973 | 14.819 | -7.253 | 1.00 | 0.00 |
| ATOM | 1743 | HA3 | GLY | 109 | 12.994 | 15.913 | -6.289 | 1.00 | 0.00 |
| ATOM | 1744 | C   | GLY | 109 | 13.619 | 13.861 | -6.267 | 1.00 | 0.00 |
| ATOM | 1745 | O   | GLY | 109 | 14.790 | 14.173 | -6.046 | 1.00 | 0.00 |
| ATOM | 1746 | N   | SER | 110 | 13.228 | 12.603 | -6.471 | 1.00 | 0.00 |
| ATOM | 1747 | H   | SER | 110 | 12.254 | 12.388 | -6.627 | 1.00 | 0.00 |
| ATOM | 1748 | CA  | SER | 110 | 14.186 | 11.498 | -6.444 | 1.00 | 0.00 |
| ATOM | 1749 | HA  | SER | 110 | 14.616 | 11.401 | -5.447 | 1.00 | 0.00 |
| ATOM | 1750 | CB  | SER | 110 | 13.486 | 10.188 | -6.803 | 1.00 | 0.00 |
| ATOM | 1751 | HB2 | SER | 110 | 13.122 | 10.238 | -7.829 | 1.00 | 0.00 |
| ATOM | 1752 | HB3 | SER | 110 | 14.189 | 9.360  | -6.707 | 1.00 | 0.00 |
| ATOM | 1753 | OG  | SER | 110 | 12.390 | 9.983  | -5.920 | 1.00 | 0.00 |
| ATOM | 1754 | HG  | SER | 110 | 11.949 | 9.160  | -6.143 | 1.00 | 0.00 |
| ATOM | 1755 | C   | SER | 110 | 15.329 | 11.759 | -7.423 | 1.00 | 0.00 |
| ATOM | 1756 | O   | SER | 110 | 15.172 | 12.510 | -8.386 | 1.00 | 0.00 |
| ATOM | 1757 | N   | ILE | 111 | 16.480 | 11.142 | -7.168 | 1.00 | 0.00 |
| ATOM | 1758 | H   | ILE | 111 | 16.578 | 10.553 | -6.353 | 1.00 | 0.00 |
| ATOM | 1759 | CA  | ILE | 111 | 17.643 | 11.326 | -8.033 | 1.00 | 0.00 |
| ATOM | 1760 | HA  | ILE | 111 | 17.553 | 12.275 | -8.561 | 1.00 | 0.00 |
| ATOM | 1761 | CB  | ILE | 111 | 18.925 | 11.330 | -7.192 | 1.00 | 0.00 |

|      |      |      |     |     |        |        |         |      |      |
|------|------|------|-----|-----|--------|--------|---------|------|------|
| ATOM | 1762 | HB   | ILE | 111 | 19.021 | 10.376 | -6.672  | 1.00 | 0.00 |
| ATOM | 1763 | CG2  | ILE | 111 | 20.139 | 11.538 | -8.105  | 1.00 | 0.00 |
| ATOM | 1764 | HG21 | ILE | 111 | 20.045 | 12.491 | -8.624  | 1.00 | 0.00 |
| ATOM | 1765 | HG22 | ILE | 111 | 21.049 | 11.540 | -7.505  | 1.00 | 0.00 |
| ATOM | 1766 | HG23 | ILE | 111 | 20.188 | 10.730 | -8.835  | 1.00 | 0.00 |
| ATOM | 1767 | CG1  | ILE | 111 | 18.856 | 12.468 | -6.165  | 1.00 | 0.00 |
| ATOM | 1768 | HG12 | ILE | 111 | 18.885 | 13.426 | -6.684  | 1.00 | 0.00 |
| ATOM | 1769 | HG13 | ILE | 111 | 17.927 | 12.389 | -5.600  | 1.00 | 0.00 |
| ATOM | 1770 | CD1  | ILE | 111 | 20.046 | 12.371 | -5.206  | 1.00 | 0.00 |
| ATOM | 1771 | HD11 | ILE | 111 | 20.976 | 12.449 | -5.770  | 1.00 | 0.00 |
| ATOM | 1772 | HD12 | ILE | 111 | 19.994 | 13.180 | -4.478  | 1.00 | 0.00 |
| ATOM | 1773 | HD13 | ILE | 111 | 20.018 | 11.413 | -4.686  | 1.00 | 0.00 |
| ATOM | 1774 | C    | ILE | 111 | 17.712 | 10.221 | -9.085  | 1.00 | 0.00 |
| ATOM | 1775 | O    | ILE | 111 | 17.320 | 10.421 | -10.236 | 1.00 | 0.00 |
| ATOM | 1776 | N    | ALA | 112 | 18.187 | 9.048  | -8.671  | 1.00 | 0.00 |
| ATOM | 1777 | H    | ALA | 112 | 18.488 | 8.936  | -7.713  | 1.00 | 0.00 |
| ATOM | 1778 | CA   | ALA | 112 | 18.278 | 7.904  | -9.559  | 1.00 | 0.00 |
| ATOM | 1779 | HA   | ALA | 112 | 18.767 | 8.150  | -10.501 | 1.00 | 0.00 |
| ATOM | 1780 | CB   | ALA | 112 | 19.055 | 6.776  | -8.887  | 1.00 | 0.00 |
| ATOM | 1781 | HB1  | ALA | 112 | 18.572 | 6.512  | -7.946  | 1.00 | 0.00 |
| ATOM | 1782 | HB2  | ALA | 112 | 19.073 | 5.905  | -9.542  | 1.00 | 0.00 |
| ATOM | 1783 | HB3  | ALA | 112 | 20.076 | 7.103  | -8.691  | 1.00 | 0.00 |



|      |      |     |     |     |        |       |         |      |      |
|------|------|-----|-----|-----|--------|-------|---------|------|------|
| ATOM | 1784 | C   | ALA | 112 | 16.887 | 7.428 | -9.868  | 1.00 | 0.00 |
| ATOM | 1785 | O   | ALA | 112 | 15.911 | 8.106 | -9.542  | 1.00 | 0.00 |
| ATOM | 1786 | N   | GLY | 113 | 16.773 | 6.244 | -10.441 | 1.00 | 0.00 |
| ATOM | 1787 | H   | GLY | 113 | 17.562 | 5.675 | -10.714 | 1.00 | 0.00 |
| ATOM | 1788 | CA  | GLY | 113 | 15.454 | 5.740 | -10.687 | 1.00 | 0.00 |
| ATOM | 1789 | HA2 | GLY | 113 | 14.800 | 6.525 | -11.064 | 1.00 | 0.00 |
| ATOM | 1790 | HA3 | GLY | 113 | 15.478 | 4.914 | -11.398 | 1.00 | 0.00 |
| ATOM | 1791 | C   | GLY | 113 | 14.909 | 5.237 | -9.366  | 1.00 | 0.00 |
| ATOM | 1792 | O   | GLY | 113 | 15.198 | 4.118 | -8.940  | 1.00 | 0.00 |
| ATOM | 1793 | N   | PHE | 114 | 14.149 | 6.104 | -8.714  | 1.00 | 0.00 |
| ATOM | 1794 | H   | PHE | 114 | 13.974 | 7.013 | -9.117  | 1.00 | 0.00 |
| ATOM | 1795 | CA  | PHE | 114 | 13.572 | 5.804 | -7.408  | 1.00 | 0.00 |
| ATOM | 1796 | HA  | PHE | 114 | 14.319 | 5.942 | -6.626  | 1.00 | 0.00 |
| ATOM | 1797 | CB  | PHE | 114 | 12.397 | 6.745 | -7.133  | 1.00 | 0.00 |
| ATOM | 1798 | HB2 | PHE | 114 | 12.685 | 7.794 | -7.203  | 1.00 | 0.00 |
| ATOM | 1799 | HB3 | PHE | 114 | 11.556 | 6.554 | -7.799  | 1.00 | 0.00 |
| ATOM | 1800 | CG  | PHE | 114 | 11.891 | 6.529 | -5.724  | 1.00 | 0.00 |
| ATOM | 1801 | CD1 | PHE | 114 | 12.499 | 7.197 | -4.653  | 1.00 | 0.00 |
| ATOM | 1802 | HD1 | PHE | 114 | 13.337 | 7.870 | -4.834  | 1.00 | 0.00 |
| ATOM | 1803 | CE1 | PHE | 114 | 12.030 | 6.999 | -3.349  | 1.00 | 0.00 |
| ATOM | 1804 | HE1 | PHE | 114 | 12.503 | 7.519 | -2.516  | 1.00 | 0.00 |
| ATOM | 1805 | CZ  | PHE | 114 | 10.956 | 6.134 | -3.114  | 1.00 | 0.00 |

|      |      |     |     |     |        |       |        |      |      |
|------|------|-----|-----|-----|--------|-------|--------|------|------|
| ATOM | 1806 | HZ  | PHE | 114 | 10.593 | 5.980 | -2.098 | 1.00 | 0.00 |
| ATOM | 1807 | CE2 | PHE | 114 | 10.348 | 5.466 | -4.184 | 1.00 | 0.00 |
| ATOM | 1808 | HE2 | PHE | 114 | 9.512  | 4.792 | -4.001 | 1.00 | 0.00 |
| ATOM | 1809 | CD2 | PHE | 114 | 10.815 | 5.664 | -5.489 | 1.00 | 0.00 |
| ATOM | 1810 | HD2 | PHE | 114 | 10.341 | 5.145 | -6.322 | 1.00 | 0.00 |
| ATOM | 1811 | C   | PHE | 114 | 13.092 | 4.353 | -7.335 | 1.00 | 0.00 |
| ATOM | 1812 | O   | PHE | 114 | 13.493 | 3.664 | -6.412 | 1.00 | 0.00 |
| ATOM | 1813 | OXT | PHE | 114 | 12.330 | 3.955 | -8.202 | 1.00 | 0.00 |

TER

|      |      |     |     |     |        |         |        |      |      |
|------|------|-----|-----|-----|--------|---------|--------|------|------|
| ATOM | 1814 | S1  | LIG | 115 | 16.890 | -18.302 | -2.528 | 1.00 | 0.00 |
| ATOM | 1815 | O1  | LIG | 115 | 18.914 | -22.094 | -0.901 | 1.00 | 0.00 |
| ATOM | 1816 | O2  | LIG | 115 | 15.495 | -17.709 | -3.149 | 1.00 | 0.00 |
| ATOM | 1817 | O3  | LIG | 115 | 17.365 | -17.901 | -1.022 | 1.00 | 0.00 |
| ATOM | 1818 | N1  | LIG | 115 | 16.519 | -20.122 | -2.600 | 1.00 | 0.00 |
| ATOM | 1819 | H1  | LIG | 115 | 15.512 | -20.217 | -2.695 | 1.00 | 0.00 |
| ATOM | 1820 | N2  | LIG | 115 | 18.552 | -20.934 | -1.711 | 1.00 | 0.00 |
| ATOM | 1821 | N3  | LIG | 115 | 21.298 | -17.259 | -6.461 | 1.00 | 0.00 |
| ATOM | 1822 | H10 | LIG | 115 | 21.101 | -16.855 | -7.360 | 1.00 | 0.00 |
| ATOM | 1823 | H11 | LIG | 115 | 22.257 | -17.470 | -6.241 | 1.00 | 0.00 |
| ATOM | 1824 | C1  | LIG | 115 | 18.261 | -18.021 | -3.736 | 1.00 | 0.00 |
| ATOM | 1825 | C2  | LIG | 115 | 17.926 | -17.461 | -4.968 | 1.00 | 0.00 |
| ATOM | 1826 | H2  | LIG | 115 | 16.893 | -17.224 | -5.193 | 1.00 | 0.00 |

|      |      |     |     |     |         |         |        |      |      |
|------|------|-----|-----|-----|---------|---------|--------|------|------|
| ATOM | 1827 | C3  | LIG | 115 | 19.571  | -18.335 | -3.377 | 1.00 | 0.00 |
| ATOM | 1828 | H3  | LIG | 115 | 19.788  | -18.794 | -2.420 | 1.00 | 0.00 |
| ATOM | 1829 | C4  | LIG | 115 | 17.230  | -21.052 | -1.865 | 1.00 | 0.00 |
| ATOM | 1830 | C5  | LIG | 115 | 20.290  | -17.512 | -5.559 | 1.00 | 0.00 |
| ATOM | 1831 | C6  | LIG | 115 | 18.945  | -17.206 | -5.880 | 1.00 | 0.00 |
| ATOM | 1832 | H4  | LIG | 115 | 18.709  | -16.767 | -6.843 | 1.00 | 0.00 |
| ATOM | 1833 | C7  | LIG | 115 | 20.584  | -18.081 | -4.295 | 1.00 | 0.00 |
| ATOM | 1834 | H5  | LIG | 115 | 21.611  | -18.324 | -4.042 | 1.00 | 0.00 |
| ATOM | 1835 | C8  | LIG | 115 | 16.699  | -22.224 | -1.225 | 1.00 | 0.00 |
| ATOM | 1836 | H6  | LIG | 115 | 15.669  | -22.539 | -1.202 | 1.00 | 0.00 |
| ATOM | 1837 | C9  | LIG | 115 | 17.775  | -22.838 | -0.652 | 1.00 | 0.00 |
| ATOM | 1838 | C10 | LIG | 115 | 17.945  | -24.073 | 0.158  | 1.00 | 0.00 |
| ATOM | 1839 | H7  | LIG | 115 | 16.983  | -24.571 | 0.299  | 1.00 | 0.00 |
| ATOM | 1840 | H8  | LIG | 115 | 18.632  | -24.771 | -0.334 | 1.00 | 0.00 |
| ATOM | 1841 | H9  | LIG | 115 | 18.364  | -23.837 | 1.142  | 1.00 | 0.00 |
| TER  |      |     |     |     |         |         |        |      |      |
| ATOM | 1842 | S1  | LIG | 116 | -20.788 | 19.378  | 3.383  | 1.00 | 0.00 |
| ATOM | 1843 | O1  | LIG | 116 | -19.212 | 22.496  | 6.368  | 1.00 | 0.00 |
| ATOM | 1844 | O2  | LIG | 116 | -22.137 | 18.613  | 2.857  | 1.00 | 0.00 |
| ATOM | 1845 | O3  | LIG | 116 | -20.054 | 20.500  | 2.457  | 1.00 | 0.00 |
| ATOM | 1846 | N1  | LIG | 116 | -21.458 | 20.179  | 4.920  | 1.00 | 0.00 |
| ATOM | 1847 | H1  | LIG | 116 | -22.471 | 20.184  | 4.836  | 1.00 | 0.00 |

|      |      |     |     |     |         |        |       |      |      |
|------|------|-----|-----|-----|---------|--------|-------|------|------|
| ATOM | 1848 | N2  | LIG | 116 | -19.485 | 21.255 | 5.649 | 1.00 | 0.00 |
| ATOM | 1849 | N3  | LIG | 116 | -16.839 | 15.225 | 5.158 | 1.00 | 0.00 |
| ATOM | 1850 | H10 | LIG | 116 | -17.086 | 14.250 | 5.169 | 1.00 | 0.00 |
| ATOM | 1851 | H11 | LIG | 116 | -15.907 | 15.476 | 5.442 | 1.00 | 0.00 |
| ATOM | 1852 | C1  | LIG | 116 | -19.564 | 18.120 | 3.965 | 1.00 | 0.00 |
| ATOM | 1853 | C2  | LIG | 116 | -19.966 | 16.785 | 3.963 | 1.00 | 0.00 |
| ATOM | 1854 | H2  | LIG | 116 | -20.967 | 16.520 | 3.643 | 1.00 | 0.00 |
| ATOM | 1855 | C3  | LIG | 116 | -18.287 | 18.527 | 4.349 | 1.00 | 0.00 |
| ATOM | 1856 | H3  | LIG | 116 | -18.022 | 19.576 | 4.364 | 1.00 | 0.00 |
| ATOM | 1857 | C4  | LIG | 116 | -20.817 | 21.232 | 5.545 | 1.00 | 0.00 |
| ATOM | 1858 | C5  | LIG | 116 | -17.743 | 16.184 | 4.763 | 1.00 | 0.00 |
| ATOM | 1859 | C6  | LIG | 116 | -19.051 | 15.816 | 4.362 | 1.00 | 0.00 |
| ATOM | 1860 | H4  | LIG | 116 | -19.340 | 14.770 | 4.364 | 1.00 | 0.00 |
| ATOM | 1861 | C7  | LIG | 116 | -17.379 | 17.552 | 4.751 | 1.00 | 0.00 |
| ATOM | 1862 | H5  | LIG | 116 | -16.382 | 17.845 | 5.062 | 1.00 | 0.00 |
| ATOM | 1863 | C8  | LIG | 116 | -21.441 | 22.367 | 6.167 | 1.00 | 0.00 |
| ATOM | 1864 | H6  | LIG | 116 | -22.497 | 22.580 | 6.216 | 1.00 | 0.00 |
| ATOM | 1865 | C9  | LIG | 116 | -20.414 | 23.113 | 6.666 | 1.00 | 0.00 |
| ATOM | 1866 | C10 | LIG | 116 | -20.340 | 24.397 | 7.411 | 1.00 | 0.00 |
| ATOM | 1867 | H7  | LIG | 116 | -21.343 | 24.797 | 7.581 | 1.00 | 0.00 |
| ATOM | 1868 | H8  | LIG | 116 | -19.850 | 24.259 | 8.381 | 1.00 | 0.00 |
| ATOM | 1869 | H9  | LIG | 116 | -19.759 | 25.139 | 6.852 | 1.00 | 0.00 |

TER

|      |      |     |     |     |        |        |        |      |      |
|------|------|-----|-----|-----|--------|--------|--------|------|------|
| ATOM | 1870 | S1  | LIG | 117 | 14.622 | 25.305 | 0.646  | 1.00 | 0.00 |
| ATOM | 1871 | O1  | LIG | 117 | 18.776 | 27.268 | 0.770  | 1.00 | 0.00 |
| ATOM | 1872 | O2  | LIG | 117 | 13.133 | 25.403 | -0.027 | 1.00 | 0.00 |
| ATOM | 1873 | O3  | LIG | 117 | 15.652 | 24.118 | 0.215  | 1.00 | 0.00 |
| ATOM | 1874 | N1  | LIG | 117 | 15.314 | 26.949 | 0.122  | 1.00 | 0.00 |
| ATOM | 1875 | H1  | LIG | 117 | 14.738 | 27.283 | -0.646 | 1.00 | 0.00 |
| ATOM | 1876 | N2  | LIG | 117 | 17.448 | 26.771 | 1.119  | 1.00 | 0.00 |
| ATOM | 1877 | N3  | LIG | 117 | 14.013 | 25.487 | 6.611  | 1.00 | 0.00 |
| ATOM | 1878 | H10 | LIG | 117 | 13.113 | 25.637 | 7.033  | 1.00 | 0.00 |
| ATOM | 1879 | H11 | LIG | 117 | 14.802 | 25.358 | 7.222  | 1.00 | 0.00 |
| ATOM | 1880 | C1  | LIG | 117 | 14.466 | 25.391 | 2.485  | 1.00 | 0.00 |
| ATOM | 1881 | C2  | LIG | 117 | 13.192 | 25.604 | 3.012  | 1.00 | 0.00 |
| ATOM | 1882 | H2  | LIG | 117 | 12.345 | 25.729 | 2.348  | 1.00 | 0.00 |
| ATOM | 1883 | C3  | LIG | 117 | 15.594 | 25.207 | 3.283  | 1.00 | 0.00 |
| ATOM | 1884 | H3  | LIG | 117 | 16.571 | 25.070 | 2.836  | 1.00 | 0.00 |
| ATOM | 1885 | C4  | LIG | 117 | 16.669 | 27.219 | 0.130  | 1.00 | 0.00 |
| ATOM | 1886 | C5  | LIG | 117 | 14.162 | 25.456 | 5.243  | 1.00 | 0.00 |
| ATOM | 1887 | C6  | LIG | 117 | 13.043 | 25.635 | 4.395  | 1.00 | 0.00 |
| ATOM | 1888 | H4  | LIG | 117 | 12.060 | 25.796 | 4.827  | 1.00 | 0.00 |
| ATOM | 1889 | C7  | LIG | 117 | 15.437 | 25.243 | 4.664  | 1.00 | 0.00 |
| ATOM | 1890 | H5  | LIG | 117 | 16.302 | 25.110 | 5.306  | 1.00 | 0.00 |

|      |      |     |     |     |        |         |        |      |      |
|------|------|-----|-----|-----|--------|---------|--------|------|------|
| ATOM | 1891 | C8  | LIG | 117 | 17.394 | 27.995  | -0.839 | 1.00 | 0.00 |
| ATOM | 1892 | H6  | LIG | 117 | 16.996 | 28.460  | -1.726 | 1.00 | 0.00 |
| ATOM | 1893 | C9  | LIG | 117 | 18.685 | 28.003  | -0.398 | 1.00 | 0.00 |
| ATOM | 1894 | C10 | LIG | 117 | 19.945 | 28.603  | -0.911 | 1.00 | 0.00 |
| ATOM | 1895 | H7  | LIG | 117 | 19.756 | 29.150  | -1.838 | 1.00 | 0.00 |
| ATOM | 1896 | H8  | LIG | 117 | 20.375 | 29.295  | -0.179 | 1.00 | 0.00 |
| ATOM | 1897 | H9  | LIG | 117 | 20.692 | 27.827  | -1.109 | 1.00 | 0.00 |
| TER  |      |     |     |     |        |         |        |      |      |
| ATOM | 1898 | S1  | LIG | 118 | 22.218 | -10.003 | 21.044 | 1.00 | 0.00 |
| ATOM | 1899 | O1  | LIG | 118 | 22.069 | -5.554  | 22.191 | 1.00 | 0.00 |
| ATOM | 1900 | O2  | LIG | 118 | 23.062 | -11.392 | 21.239 | 1.00 | 0.00 |
| ATOM | 1901 | O3  | LIG | 118 | 20.763 | -9.808  | 21.751 | 1.00 | 0.00 |
| ATOM | 1902 | N1  | LIG | 118 | 23.429 | -8.792  | 21.767 | 1.00 | 0.00 |
| ATOM | 1903 | H1  | LIG | 118 | 24.084 | -9.327  | 22.330 | 1.00 | 0.00 |
| ATOM | 1904 | N2  | LIG | 118 | 22.180 | -6.811  | 21.454 | 1.00 | 0.00 |
| ATOM | 1905 | N3  | LIG | 118 | 21.863 | -8.822  | 15.172 | 1.00 | 0.00 |
| ATOM | 1906 | H10 | LIG | 118 | 22.344 | -9.396  | 14.501 | 1.00 | 0.00 |
| ATOM | 1907 | H11 | LIG | 118 | 21.314 | -8.054  | 14.825 | 1.00 | 0.00 |
| ATOM | 1908 | C1  | LIG | 118 | 22.120 | -9.599  | 19.242 | 1.00 | 0.00 |
| ATOM | 1909 | C2  | LIG | 118 | 22.811 | -10.428 | 18.360 | 1.00 | 0.00 |
| ATOM | 1910 | H2  | LIG | 118 | 23.390 | -11.262 | 18.741 | 1.00 | 0.00 |
| ATOM | 1911 | C3  | LIG | 118 | 21.345 | -8.520  | 18.819 | 1.00 | 0.00 |

|      |      |     |     |     |         |         |         |      |      |
|------|------|-----|-----|-----|---------|---------|---------|------|------|
| ATOM | 1912 | H3  | LIG | 118 | 20.845  | -7.882  | 19.537  | 1.00 | 0.00 |
| ATOM | 1913 | C4  | LIG | 118 | 23.057  | -7.523  | 22.169  | 1.00 | 0.00 |
| ATOM | 1914 | C5  | LIG | 118 | 21.949  | -9.080  | 16.522  | 1.00 | 0.00 |
| ATOM | 1915 | C6  | LIG | 118 | 22.723  | -10.167 | 16.997  | 1.00 | 0.00 |
| ATOM | 1916 | H4  | LIG | 118 | 23.249  | -10.802 | 16.291  | 1.00 | 0.00 |
| ATOM | 1917 | C7  | LIG | 118 | 21.265  | -8.263  | 17.454  | 1.00 | 0.00 |
| ATOM | 1918 | H5  | LIG | 118 | 20.674  | -7.424  | 17.100  | 1.00 | 0.00 |
| ATOM | 1919 | C8  | LIG | 118 | 23.545  | -6.811  | 23.318  | 1.00 | 0.00 |
| ATOM | 1920 | H6  | LIG | 118 | 24.252  | -7.168  | 24.049  | 1.00 | 0.00 |
| ATOM | 1921 | C9  | LIG | 118 | 22.914  | -5.602  | 23.285  | 1.00 | 0.00 |
| ATOM | 1922 | C10 | LIG | 118 | 22.946  | -4.399  | 24.158  | 1.00 | 0.00 |
| ATOM | 1923 | H7  | LIG | 118 | 23.637  | -4.552  | 24.991  | 1.00 | 0.00 |
| ATOM | 1924 | H8  | LIG | 118 | 23.268  | -3.516  | 23.596  | 1.00 | 0.00 |
| ATOM | 1925 | H9  | LIG | 118 | 21.951  | -4.187  | 24.564  | 1.00 | 0.00 |
| TER  |      |     |     |     |         |         |         |      |      |
| ATOM | 1926 | S1  | LIG | 119 | -23.009 | 18.754  | -22.550 | 1.00 | 0.00 |
| ATOM | 1927 | O1  | LIG | 119 | -18.734 | 17.090  | -22.274 | 1.00 | 0.00 |
| ATOM | 1928 | O2  | LIG | 119 | -23.933 | 19.919  | -23.235 | 1.00 | 0.00 |
| ATOM | 1929 | O3  | LIG | 119 | -23.140 | 17.202  | -23.029 | 1.00 | 0.00 |
| ATOM | 1930 | N1  | LIG | 119 | -21.320 | 19.398  | -22.980 | 1.00 | 0.00 |
| ATOM | 1931 | H1  | LIG | 119 | -21.439 | 20.066  | -23.737 | 1.00 | 0.00 |
| ATOM | 1932 | N2  | LIG | 119 | -20.024 | 17.701  | -21.967 | 1.00 | 0.00 |

|      |      |     |     |     |         |        |         |      |      |
|------|------|-----|-----|-----|---------|--------|---------|------|------|
| ATOM | 1933 | N3  | LIG | 119 | -23.570 | 19.161 | -16.591 | 1.00 | 0.00 |
| ATOM | 1934 | H10 | LIG | 119 | -24.102 | 19.905 | -16.173 | 1.00 | 0.00 |
| ATOM | 1935 | H11 | LIG | 119 | -23.149 | 18.484 | -15.978 | 1.00 | 0.00 |
| ATOM | 1936 | C1  | LIG | 119 | -23.140 | 18.877 | -20.711 | 1.00 | 0.00 |
| ATOM | 1937 | C2  | LIG | 119 | -23.886 | 19.932 | -20.189 | 1.00 | 0.00 |
| ATOM | 1938 | H2  | LIG | 119 | -24.349 | 20.651 | -20.856 | 1.00 | 0.00 |
| ATOM | 1939 | C3  | LIG | 119 | -22.532 | 17.911 | -19.910 | 1.00 | 0.00 |
| ATOM | 1940 | H3  | LIG | 119 | -21.938 | 17.120 | -20.351 | 1.00 | 0.00 |
| ATOM | 1941 | C4  | LIG | 119 | -20.192 | 18.600 | -22.942 | 1.00 | 0.00 |
| ATOM | 1942 | C5  | LIG | 119 | -23.428 | 19.068 | -17.957 | 1.00 | 0.00 |
| ATOM | 1943 | C6  | LIG | 119 | -24.030 | 20.026 | -18.809 | 1.00 | 0.00 |
| ATOM | 1944 | H4  | LIG | 119 | -24.610 | 20.836 | -18.381 | 1.00 | 0.00 |
| ATOM | 1945 | C7  | LIG | 119 | -22.677 | 18.013 | -18.530 | 1.00 | 0.00 |
| ATOM | 1946 | H5  | LIG | 119 | -22.207 | 17.277 | -17.886 | 1.00 | 0.00 |
| ATOM | 1947 | C8  | LIG | 119 | -19.087 | 18.635 | -23.860 | 1.00 | 0.00 |
| ATOM | 1948 | H6  | LIG | 119 | -18.984 | 19.267 | -24.727 | 1.00 | 0.00 |
| ATOM | 1949 | C9  | LIG | 119 | -18.211 | 17.693 | -23.404 | 1.00 | 0.00 |
| ATOM | 1950 | C10 | LIG | 119 | -16.886 | 17.206 | -23.870 | 1.00 | 0.00 |
| ATOM | 1951 | H7  | LIG | 119 | -16.578 | 17.744 | -24.770 | 1.00 | 0.00 |
| ATOM | 1952 | H8  | LIG | 119 | -16.123 | 17.351 | -23.098 | 1.00 | 0.00 |
| ATOM | 1953 | H9  | LIG | 119 | -16.924 | 16.136 | -24.099 | 1.00 | 0.00 |

TER



|      |      |     |     |     |        |       |         |      |      |
|------|------|-----|-----|-----|--------|-------|---------|------|------|
| ATOM | 1954 | S1  | LIG | 120 | -5.268 | 4.240 | -19.785 | 1.00 | 0.00 |
| ATOM | 1955 | O1  | LIG | 120 | -7.237 | 8.361 | -20.293 | 1.00 | 0.00 |
| ATOM | 1956 | O2  | LIG | 120 | -4.676 | 3.183 | -18.683 | 1.00 | 0.00 |
| ATOM | 1957 | O3  | LIG | 120 | -6.668 | 3.935 | -20.560 | 1.00 | 0.00 |
| ATOM | 1958 | N1  | LIG | 120 | -5.467 | 5.741 | -18.708 | 1.00 | 0.00 |
| ATOM | 1959 | H1  | LIG | 120 | -5.460 | 5.419 | -17.744 | 1.00 | 0.00 |
| ATOM | 1960 | N2  | LIG | 120 | -6.308 | 7.236 | -20.333 | 1.00 | 0.00 |
| ATOM | 1961 | N3  | LIG | 120 | -0.921 | 5.484 | -23.729 | 1.00 | 0.00 |
| ATOM | 1962 | H10 | LIG | 120 | 0.007  | 5.120 | -23.604 | 1.00 | 0.00 |
| ATOM | 1963 | H11 | LIG | 120 | -1.098 | 6.052 | -24.540 | 1.00 | 0.00 |
| ATOM | 1964 | C1  | LIG | 120 | -3.937 | 4.665 | -20.996 | 1.00 | 0.00 |
| ATOM | 1965 | C2  | LIG | 120 | -2.669 | 4.133 | -20.768 | 1.00 | 0.00 |
| ATOM | 1966 | H2  | LIG | 120 | -2.489 | 3.512 | -19.899 | 1.00 | 0.00 |
| ATOM | 1967 | C3  | LIG | 120 | -4.239 | 5.458 | -22.102 | 1.00 | 0.00 |
| ATOM | 1968 | H3  | LIG | 120 | -5.231 | 5.875 | -22.230 | 1.00 | 0.00 |
| ATOM | 1969 | C4  | LIG | 120 | -6.267 | 6.809 | -19.068 | 1.00 | 0.00 |
| ATOM | 1970 | C5  | LIG | 120 | -1.920 | 5.212 | -22.822 | 1.00 | 0.00 |
| ATOM | 1971 | C6  | LIG | 120 | -1.660 | 4.408 | -21.685 | 1.00 | 0.00 |
| ATOM | 1972 | H4  | LIG | 120 | -0.666 | 4.002 | -21.531 | 1.00 | 0.00 |
| ATOM | 1973 | C7  | LIG | 120 | -3.224 | 5.732 | -23.012 | 1.00 | 0.00 |
| ATOM | 1974 | H5  | LIG | 120 | -3.433 | 6.354 | -23.877 | 1.00 | 0.00 |
| ATOM | 1975 | C8  | LIG | 120 | -7.095 | 7.592 | -18.192 | 1.00 | 0.00 |

|      |      |     |     |     |         |         |         |      |      |
|------|------|-----|-----|-----|---------|---------|---------|------|------|
| ATOM | 1976 | H6  | LIG | 120 | -7.236  | 7.449   | -17.133 | 1.00 | 0.00 |
| ATOM | 1977 | C9  | LIG | 120 | -7.666  | 8.540   | -18.990 | 1.00 | 0.00 |
| ATOM | 1978 | C10 | LIG | 120 | -8.620  | 9.654   | -18.746 | 1.00 | 0.00 |
| ATOM | 1979 | H7  | LIG | 120 | -8.896  | 9.694   | -17.690 | 1.00 | 0.00 |
| ATOM | 1980 | H8  | LIG | 120 | -8.178  | 10.616  | -19.029 | 1.00 | 0.00 |
| ATOM | 1981 | H9  | LIG | 120 | -9.530  | 9.523   | -19.341 | 1.00 | 0.00 |
| TER  |      |     |     |     |         |         |         |      |      |
| ATOM | 1982 | S1  | LIG | 121 | -15.675 | -26.578 | -18.687 | 1.00 | 0.00 |
| ATOM | 1983 | O1  | LIG | 121 | -13.076 | -28.135 | -15.231 | 1.00 | 0.00 |
| ATOM | 1984 | O2  | LIG | 121 | -15.747 | -25.476 | -19.896 | 1.00 | 0.00 |
| ATOM | 1985 | O3  | LIG | 121 | -15.456 | -28.159 | -19.016 | 1.00 | 0.00 |
| ATOM | 1986 | N1  | LIG | 121 | -14.206 | -25.927 | -17.753 | 1.00 | 0.00 |
| ATOM | 1987 | H1  | LIG | 121 | -13.702 | -25.309 | -18.384 | 1.00 | 0.00 |
| ATOM | 1988 | N2  | LIG | 121 | -14.147 | -27.532 | -16.020 | 1.00 | 0.00 |
| ATOM | 1989 | N3  | LIG | 121 | -20.465 | -25.820 | -15.156 | 1.00 | 0.00 |
| ATOM | 1990 | H10 | LIG | 121 | -21.107 | -25.063 | -15.314 | 1.00 | 0.00 |
| ATOM | 1991 | H11 | LIG | 121 | -20.660 | -26.450 | -14.396 | 1.00 | 0.00 |
| ATOM | 1992 | C1  | LIG | 121 | -17.126 | -26.346 | -17.565 | 1.00 | 0.00 |
| ATOM | 1993 | C2  | LIG | 121 | -17.978 | -25.276 | -17.832 | 1.00 | 0.00 |
| ATOM | 1994 | H2  | LIG | 121 | -17.769 | -24.609 | -18.660 | 1.00 | 0.00 |
| ATOM | 1995 | C3  | LIG | 121 | -17.345 | -27.249 | -16.526 | 1.00 | 0.00 |
| ATOM | 1996 | H3  | LIG | 121 | -16.645 | -28.052 | -16.334 | 1.00 | 0.00 |

|      |      |     |     |     |         |         |         |      |      |
|------|------|-----|-----|-----|---------|---------|---------|------|------|
| ATOM | 1997 | C4  | LIG | 121 | -13.506 | -26.698 | -16.844 | 1.00 | 0.00 |
| ATOM | 1998 | C5  | LIG | 121 | -19.358 | -25.993 | -15.955 | 1.00 | 0.00 |
| ATOM | 1999 | C6  | LIG | 121 | -19.097 | -25.101 | -17.024 | 1.00 | 0.00 |
| ATOM | 2000 | H4  | LIG | 121 | -19.777 | -24.278 | -17.216 | 1.00 | 0.00 |
| ATOM | 2001 | C7  | LIG | 121 | -18.464 | -27.066 | -15.720 | 1.00 | 0.00 |
| ATOM | 2002 | H5  | LIG | 121 | -18.652 | -27.751 | -14.900 | 1.00 | 0.00 |
| ATOM | 2003 | C8  | LIG | 121 | -12.083 | -26.697 | -16.637 | 1.00 | 0.00 |
| ATOM | 2004 | H6  | LIG | 121 | -11.351 | -26.116 | -17.173 | 1.00 | 0.00 |
| ATOM | 2005 | C9  | LIG | 121 | -11.868 | -27.591 | -15.629 | 1.00 | 0.00 |
| ATOM | 2006 | C10 | LIG | 121 | -10.651 | -28.078 | -14.927 | 1.00 | 0.00 |
| ATOM | 2007 | H7  | LIG | 121 | -9.759  | -27.590 | -15.328 | 1.00 | 0.00 |
| ATOM | 2008 | H8  | LIG | 121 | -10.710 | -27.871 | -13.853 | 1.00 | 0.00 |
| ATOM | 2009 | H9  | LIG | 121 | -10.540 | -29.161 | -15.048 | 1.00 | 0.00 |
| TER  |      |     |     |     |         |         |         |      |      |
| ATOM | 2010 | S1  | LIG | 122 | -8.609  | -10.453 | -18.697 | 1.00 | 0.00 |
| ATOM | 2011 | O1  | LIG | 122 | -6.408  | -6.925  | -20.655 | 1.00 | 0.00 |
| ATOM | 2012 | O2  | LIG | 122 | -9.043  | -11.108 | -17.261 | 1.00 | 0.00 |
| ATOM | 2013 | O3  | LIG | 122 | -9.721  | -9.758  | -19.664 | 1.00 | 0.00 |
| ATOM | 2014 | N1  | LIG | 122 | -7.407  | -9.164  | -18.106 | 1.00 | 0.00 |
| ATOM | 2015 | H1  | LIG | 122 | -7.586  | -9.022  | -17.116 | 1.00 | 0.00 |
| ATOM | 2016 | N2  | LIG | 122 | -6.800  | -8.256  | -20.201 | 1.00 | 0.00 |
| ATOM | 2017 | N3  | LIG | 122 | -5.437  | -14.529 | -21.749 | 1.00 | 0.00 |

|      |      |     |     |     |        |         |         |      |      |
|------|------|-----|-----|-----|--------|---------|---------|------|------|
| ATOM | 2018 | H10 | LIG | 122 | -5.194 | -15.411 | -21.332 | 1.00 | 0.00 |
| ATOM | 2019 | H11 | LIG | 122 | -5.141 | -14.361 | -22.696 | 1.00 | 0.00 |
| ATOM | 2020 | C1  | LIG | 122 | -7.602 | -11.679 | -19.646 | 1.00 | 0.00 |
| ATOM | 2021 | C2  | LIG | 122 | -7.293 | -12.882 | -19.014 | 1.00 | 0.00 |
| ATOM | 2022 | H2  | LIG | 122 | -7.627 | -13.063 | -17.998 | 1.00 | 0.00 |
| ATOM | 2023 | C3  | LIG | 122 | -7.218 | -11.390 | -20.955 | 1.00 | 0.00 |
| ATOM | 2024 | H3  | LIG | 122 | -7.454 | -10.433 | -21.403 | 1.00 | 0.00 |
| ATOM | 2025 | C4  | LIG | 122 | -7.021 | -8.096  | -18.893 | 1.00 | 0.00 |
| ATOM | 2026 | C5  | LIG | 122 | -6.154 | -13.585 | -21.051 | 1.00 | 0.00 |
| ATOM | 2027 | C6  | LIG | 122 | -6.568 | -13.837 | -19.720 | 1.00 | 0.00 |
| ATOM | 2028 | H4  | LIG | 122 | -6.320 | -14.782 | -19.250 | 1.00 | 0.00 |
| ATOM | 2029 | C7  | LIG | 122 | -6.489 | -12.348 | -21.653 | 1.00 | 0.00 |
| ATOM | 2030 | H5  | LIG | 122 | -6.172 | -12.143 | -22.671 | 1.00 | 0.00 |
| ATOM | 2031 | C8  | LIG | 122 | -6.781 | -6.749  | -18.451 | 1.00 | 0.00 |
| ATOM | 2032 | H6  | LIG | 122 | -6.891 | -6.366  | -17.450 | 1.00 | 0.00 |
| ATOM | 2033 | C9  | LIG | 122 | -6.399 | -6.067  | -19.570 | 1.00 | 0.00 |
| ATOM | 2034 | C10 | LIG | 122 | -6.013 | -4.656  | -19.834 | 1.00 | 0.00 |
| ATOM | 2035 | H7  | LIG | 122 | -6.050 | -4.072  | -18.911 | 1.00 | 0.00 |
| ATOM | 2036 | H8  | LIG | 122 | -4.998 | -4.599  | -20.244 | 1.00 | 0.00 |
| ATOM | 2037 | H9  | LIG | 122 | -6.689 | -4.199  | -20.565 | 1.00 | 0.00 |
| TER  |      |     |     |     |        |         |         |      |      |
| ATOM | 2038 | S1  | LIG | 123 | -5.631 | 17.028  | 17.908  | 1.00 | 0.00 |

|      |      |     |     |     |         |        |        |      |      |
|------|------|-----|-----|-----|---------|--------|--------|------|------|
| ATOM | 2039 | O1  | LIG | 123 | -2.085  | 18.932 | 20.127 | 1.00 | 0.00 |
| ATOM | 2040 | O2  | LIG | 123 | -6.174  | 16.563 | 16.435 | 1.00 | 0.00 |
| ATOM | 2041 | O3  | LIG | 123 | -5.200  | 15.921 | 19.023 | 1.00 | 0.00 |
| ATOM | 2042 | N1  | LIG | 123 | -4.139  | 18.011 | 17.398 | 1.00 | 0.00 |
| ATOM | 2043 | H1  | LIG | 123 | -3.912  | 17.736 | 16.446 | 1.00 | 0.00 |
| ATOM | 2044 | N2  | LIG | 123 | -3.398  | 18.670 | 19.543 | 1.00 | 0.00 |
| ATOM | 2045 | N3  | LIG | 123 | -9.571  | 20.911 | 20.230 | 1.00 | 0.00 |
| ATOM | 2046 | H10 | LIG | 123 | -10.362 | 21.225 | 19.694 | 1.00 | 0.00 |
| ATOM | 2047 | H11 | LIG | 123 | -9.472  | 21.260 | 21.168 | 1.00 | 0.00 |
| ATOM | 2048 | C1  | LIG | 123 | -6.813  | 18.250 | 18.634 | 1.00 | 0.00 |
| ATOM | 2049 | C2  | LIG | 123 | -7.888  | 18.652 | 17.842 | 1.00 | 0.00 |
| ATOM | 2050 | H2  | LIG | 123 | -7.996  | 18.262 | 16.836 | 1.00 | 0.00 |
| ATOM | 2051 | C3  | LIG | 123 | -6.624  | 18.701 | 19.939 | 1.00 | 0.00 |
| ATOM | 2052 | H3  | LIG | 123 | -5.761  | 18.387 | 20.514 | 1.00 | 0.00 |
| ATOM | 2053 | C4  | LIG | 123 | -3.123  | 18.326 | 18.281 | 1.00 | 0.00 |
| ATOM | 2054 | C5  | LIG | 123 | -8.657  | 20.029 | 19.699 | 1.00 | 0.00 |
| ATOM | 2055 | C6  | LIG | 123 | -8.812  | 19.543 | 18.378 | 1.00 | 0.00 |
| ATOM | 2056 | H4  | LIG | 123 | -9.658  | 19.866 | 17.782 | 1.00 | 0.00 |
| ATOM | 2057 | C7  | LIG | 123 | -7.550  | 19.595 | 20.467 | 1.00 | 0.00 |
| ATOM | 2058 | H5  | LIG | 123 | -7.419  | 19.966 | 21.479 | 1.00 | 0.00 |
| ATOM | 2059 | C8  | LIG | 123 | -1.716  | 18.363 | 17.990 | 1.00 | 0.00 |
| ATOM | 2060 | H6  | LIG | 123 | -1.242  | 18.126 | 17.052 | 1.00 | 0.00 |

|      |      |     |     |     |         |        |        |      |      |
|------|------|-----|-----|-----|---------|--------|--------|------|------|
| ATOM | 2061 | C9  | LIG | 123 | -1.119  | 18.748 | 19.155 | 1.00 | 0.00 |
| ATOM | 2062 | C10 | LIG | 123 | 0.292   | 18.979 | 19.562 | 1.00 | 0.00 |
| ATOM | 2063 | H7  | LIG | 123 | 0.966   | 18.796 | 18.721 | 1.00 | 0.00 |
| ATOM | 2064 | H8  | LIG | 123 | 0.436   | 20.009 | 19.907 | 1.00 | 0.00 |
| ATOM | 2065 | H9  | LIG | 123 | 0.573   | 18.313 | 20.385 | 1.00 | 0.00 |
| TER  |      |     |     |     |         |        |        |      |      |
| ATOM | 2066 | S1  | LIG | 124 | -20.923 | -3.296 | 0.955  | 1.00 | 0.00 |
| ATOM | 2067 | O1  | LIG | 124 | -19.123 | 0.571  | -0.757 | 1.00 | 0.00 |
| ATOM | 2068 | O2  | LIG | 124 | -21.621 | -3.956 | 2.281  | 1.00 | 0.00 |
| ATOM | 2069 | O3  | LIG | 124 | -21.803 | -2.988 | -0.381 | 1.00 | 0.00 |
| ATOM | 2070 | N1  | LIG | 124 | -20.315 | -1.697 | 1.682  | 1.00 | 0.00 |
| ATOM | 2071 | H1  | LIG | 124 | -20.828 | -1.549 | 2.547  | 1.00 | 0.00 |
| ATOM | 2072 | N2  | LIG | 124 | -19.310 | -0.787 | -0.253 | 1.00 | 0.00 |
| ATOM | 2073 | N3  | LIG | 124 | -16.071 | -6.539 | -0.436 | 1.00 | 0.00 |
| ATOM | 2074 | H10 | LIG | 124 | -15.771 | -7.296 | 0.154  | 1.00 | 0.00 |
| ATOM | 2075 | H11 | LIG | 124 | -15.540 | -6.354 | -1.269 | 1.00 | 0.00 |
| ATOM | 2076 | C1  | LIG | 124 | -19.406 | -4.259 | 0.522  | 1.00 | 0.00 |
| ATOM | 2077 | C2  | LIG | 124 | -19.036 | -5.294 | 1.381  | 1.00 | 0.00 |
| ATOM | 2078 | H2  | LIG | 124 | -19.621 | -5.496 | 2.270  | 1.00 | 0.00 |
| ATOM | 2079 | C3  | LIG | 124 | -18.706 | -3.957 | -0.645 | 1.00 | 0.00 |
| ATOM | 2080 | H3  | LIG | 124 | -19.009 | -3.128 | -1.273 | 1.00 | 0.00 |
| ATOM | 2081 | C4  | LIG | 124 | -19.966 | -0.613 | 0.898  | 1.00 | 0.00 |

|      |      |     |     |     |         |        |        |      |      |
|------|------|-----|-----|-----|---------|--------|--------|------|------|
| ATOM | 2082 | C5  | LIG | 124 | -17.176 | -5.784 | -0.117 | 1.00 | 0.00 |
| ATOM | 2083 | C6  | LIG | 124 | -17.919 | -6.057 | 1.058  | 1.00 | 0.00 |
| ATOM | 2084 | H4  | LIG | 124 | -17.615 | -6.870 | 1.709  | 1.00 | 0.00 |
| ATOM | 2085 | C7  | LIG | 124 | -17.588 | -4.722 | -0.959 | 1.00 | 0.00 |
| ATOM | 2086 | H5  | LIG | 124 | -17.023 | -4.501 | -1.859 | 1.00 | 0.00 |
| ATOM | 2087 | C8  | LIG | 124 | -20.207 | 0.772  | 1.195  | 1.00 | 0.00 |
| ATOM | 2088 | H6  | LIG | 124 | -20.717 | 1.170  | 2.057  | 1.00 | 0.00 |
| ATOM | 2089 | C9  | LIG | 124 | -19.664 | 1.463  | 0.151  | 1.00 | 0.00 |
| ATOM | 2090 | C10 | LIG | 124 | -19.562 | 2.907  | -0.186 | 1.00 | 0.00 |
| ATOM | 2091 | H7  | LIG | 124 | -20.029 | 3.514  | 0.594  | 1.00 | 0.00 |
| ATOM | 2092 | H8  | LIG | 124 | -18.515 | 3.212  | -0.287 | 1.00 | 0.00 |
| ATOM | 2093 | H9  | LIG | 124 | -20.060 | 3.119  | -1.139 | 1.00 | 0.00 |
| TER  |      |     |     |     |         |        |        |      |      |
| END  |      |     |     |     |         |        |        |      |      |

**Table I:** The number of atoms present in the system of BN-Dic

|      |   |    |     |   |        |         |       |      |      |
|------|---|----|-----|---|--------|---------|-------|------|------|
| ATOM | 1 | N  | GLN | 1 | -7.077 | -12.405 | 1.432 | 1.00 | 0.00 |
| ATOM | 2 | H1 | GLN | 1 | -6.146 | -12.736 | 1.641 | 1.00 | 0.00 |
| ATOM | 3 | H2 | GLN | 1 | -7.308 | -11.659 | 2.072 | 1.00 | 0.00 |
| ATOM | 4 | H3 | GLN | 1 | -7.154 | -12.258 | 0.436 | 1.00 | 0.00 |
| ATOM | 5 | CA | GLN | 1 | -8.022 | -13.483 | 1.738 | 1.00 | 0.00 |
| ATOM | 6 | HA | GLN | 1 | -8.724 | -13.145 | 2.500 | 1.00 | 0.00 |

|      |    |      |     |   |         |         |        |      |      |
|------|----|------|-----|---|---------|---------|--------|------|------|
| ATOM | 7  | CB   | GLN | 1 | -8.815  | -13.899 | 0.491  | 1.00 | 0.00 |
| ATOM | 8  | HB2  | GLN | 1 | -8.518  | -13.265 | -0.344 | 1.00 | 0.00 |
| ATOM | 9  | HB3  | GLN | 1 | -8.585  | -14.939 | 0.257  | 1.00 | 0.00 |
| ATOM | 10 | CG   | GLN | 1 | -10.315 | -13.752 | 0.732  | 1.00 | 0.00 |
| ATOM | 11 | HG2  | GLN | 1 | -10.930 | -14.559 | 0.333  | 1.00 | 0.00 |
| ATOM | 12 | HG3  | GLN | 1 | -10.391 | -13.741 | 1.819  | 1.00 | 0.00 |
| ATOM | 13 | CD   | GLN | 1 | -10.840 | -12.431 | 0.195  | 1.00 | 0.00 |
| ATOM | 14 | OE1  | GLN | 1 | -11.198 | -11.530 | 0.935  | 1.00 | 0.00 |
| ATOM | 15 | NE2  | GLN | 1 | -10.736 | -12.271 | -1.111 | 1.00 | 0.00 |
| ATOM | 16 | HE21 | GLN | 1 | -11.064 | -11.418 | -1.540 | 1.00 | 0.00 |
| ATOM | 17 | HE22 | GLN | 1 | -10.329 | -13.003 | -1.676 | 1.00 | 0.00 |
| ATOM | 18 | C    | GLN | 1 | -7.290  | -14.686 | 2.322  | 1.00 | 0.00 |
| ATOM | 19 | O    | GLN | 1 | -7.642  | -15.166 | 3.390  | 1.00 | 0.00 |
| ATOM | 20 | N    | PRO | 2 | -6.232  | -15.137 | 1.626  | 1.00 | 0.00 |
| ATOM | 21 | CD   | PRO | 2 | -5.736  | -14.613 | 0.355  | 1.00 | 0.00 |
| ATOM | 22 | HD2  | PRO | 2 | -5.331  | -13.619 | 0.545  | 1.00 | 0.00 |
| ATOM | 23 | HD3  | PRO | 2 | -6.586  | -14.535 | -0.322 | 1.00 | 0.00 |
| ATOM | 24 | CG   | PRO | 2 | -4.682  | -15.586 | -0.148 | 1.00 | 0.00 |
| ATOM | 25 | HG2  | PRO | 2 | -3.717  | -15.081 | -0.189 | 1.00 | 0.00 |
| ATOM | 26 | HG3  | PRO | 2 | -4.956  | -15.927 | -1.147 | 1.00 | 0.00 |
| ATOM | 27 | CB   | PRO | 2 | -4.659  | -16.752 | 0.839  | 1.00 | 0.00 |
| ATOM | 28 | HB2  | PRO | 2 | -3.639  | -17.013 | 1.122  | 1.00 | 0.00 |



|      |    |          |   |        |         |       |      |      |
|------|----|----------|---|--------|---------|-------|------|------|
| ATOM | 29 | HB3 PRO  | 2 | -5.153 | -17.627 | 0.417 | 1.00 | 0.00 |
| ATOM | 30 | CA PRO   | 2 | -5.428 | -16.259 | 2.063 | 1.00 | 0.00 |
| ATOM | 31 | HA PRO   | 2 | -6.098 | -17.065 | 2.362 | 1.00 | 0.00 |
| ATOM | 32 | C PRO    | 2 | -4.538 | -15.893 | 3.219 | 1.00 | 0.00 |
| ATOM | 33 | O PRO    | 2 | -3.549 | -15.212 | 3.007 | 1.00 | 0.00 |
| ATOM | 34 | N GLN    | 3 | -4.884 | -16.356 | 4.424 | 1.00 | 0.00 |
| ATOM | 35 | H GLN    | 3 | -5.707 | -16.934 | 4.519 | 1.00 | 0.00 |
| ATOM | 36 | CA GLN   | 3 | -4.116 | -16.054 | 5.613 | 1.00 | 0.00 |
| ATOM | 37 | HA GLN   | 3 | -4.042 | -14.974 | 5.736 | 1.00 | 0.00 |
| ATOM | 38 | CB GLN   | 3 | -4.782 | -16.642 | 6.856 | 1.00 | 0.00 |
| ATOM | 39 | HB2 GLN  | 3 | -5.833 | -16.831 | 6.637 | 1.00 | 0.00 |
| ATOM | 40 | HB3 GLN  | 3 | -4.290 | -17.582 | 7.108 | 1.00 | 0.00 |
| ATOM | 41 | CG GLN   | 3 | -4.673 | -15.673 | 8.041 | 1.00 | 0.00 |
| ATOM | 42 | HG2 GLN  | 3 | -4.227 | -16.217 | 8.874 | 1.00 | 0.00 |
| ATOM | 43 | HG3 GLN  | 3 | -4.043 | -14.821 | 7.785 | 1.00 | 0.00 |
| ATOM | 44 | CD GLN   | 3 | -6.030 | -15.160 | 8.470 | 1.00 | 0.00 |
| ATOM | 45 | OE1 GLN  | 3 | -6.650 | -15.674 | 9.380 | 1.00 | 0.00 |
| ATOM | 46 | NE2 GLN  | 3 | -6.496 | -14.148 | 7.760 | 1.00 | 0.00 |
| ATOM | 47 | HE21 GLN | 3 | -7.396 | -13.750 | 7.985 | 1.00 | 0.00 |
| ATOM | 48 | HE22 GLN | 3 | -5.950 | -13.778 | 6.995 | 1.00 | 0.00 |
| ATOM | 49 | C GLN    | 3 | -2.734 | -16.631 | 5.489 | 1.00 | 0.00 |
| ATOM | 50 | O GLN    | 3 | -1.793 | -16.054 | 5.961 | 1.00 | 0.00 |

|      |    |     |     |   |        |         |        |      |      |
|------|----|-----|-----|---|--------|---------|--------|------|------|
| ATOM | 51 | N   | LYS | 4 | -2.568 | -17.745 | 4.784  | 1.00 | 0.00 |
| ATOM | 52 | H   | LYS | 4 | -3.384 | -18.227 | 4.435  | 1.00 | 0.00 |
| ATOM | 53 | CA  | LYS | 4 | -1.264 | -18.352 | 4.568  | 1.00 | 0.00 |
| ATOM | 54 | HA  | LYS | 4 | -0.913 | -18.831 | 5.482  | 1.00 | 0.00 |
| ATOM | 55 | CB  | LYS | 4 | -1.371 | -19.414 | 3.470  | 1.00 | 0.00 |
| ATOM | 56 | HB2 | LYS | 4 | -0.539 | -20.110 | 3.581  | 1.00 | 0.00 |
| ATOM | 57 | HB3 | LYS | 4 | -2.311 | -19.950 | 3.599  | 1.00 | 0.00 |
| ATOM | 58 | CG  | LYS | 4 | -1.329 | -18.785 | 2.068  | 1.00 | 0.00 |
| ATOM | 59 | HG2 | LYS | 4 | -1.538 | -17.719 | 2.156  | 1.00 | 0.00 |
| ATOM | 60 | HG3 | LYS | 4 | -0.332 | -18.927 | 1.650  | 1.00 | 0.00 |
| ATOM | 61 | CD  | LYS | 4 | -2.363 | -19.432 | 1.148  | 1.00 | 0.00 |
| ATOM | 62 | HD2 | LYS | 4 | -3.326 | -19.454 | 1.659  | 1.00 | 0.00 |
| ATOM | 63 | HD3 | LYS | 4 | -2.448 | -18.837 | 0.239  | 1.00 | 0.00 |
| ATOM | 64 | CE  | LYS | 4 | -1.947 | -20.857 | 0.786  | 1.00 | 0.00 |
| ATOM | 65 | HE2 | LYS | 4 | -1.746 | -20.910 | -0.284 | 1.00 | 0.00 |
| ATOM | 66 | HE3 | LYS | 4 | -1.044 | -21.117 | 1.338  | 1.00 | 0.00 |
| ATOM | 67 | NZ  | LYS | 4 | -3.023 | -21.804 | 1.131  | 1.00 | 0.00 |
| ATOM | 68 | HZ1 | LYS | 4 | -3.860 | -21.564 | 0.619  | 1.00 | 0.00 |
| ATOM | 69 | HZ2 | LYS | 4 | -2.737 | -22.742 | 0.887  | 1.00 | 0.00 |
| ATOM | 70 | HZ3 | LYS | 4 | -3.209 | -21.756 | 2.122  | 1.00 | 0.00 |
| ATOM | 71 | C   | LYS | 4 | -0.210 | -17.280 | 4.239  | 1.00 | 0.00 |
| ATOM | 72 | O   | LYS | 4 | 0.933  | -17.444 | 4.603  | 1.00 | 0.00 |

|      |    |     |     |   |        |         |       |      |      |
|------|----|-----|-----|---|--------|---------|-------|------|------|
| ATOM | 73 | N   | CYX | 5 | -0.654 | -16.181 | 3.603 | 1.00 | 0.00 |
| ATOM | 74 | H   | CYX | 5 | -1.614 | -16.148 | 3.291 | 1.00 | 0.00 |
| ATOM | 75 | CA  | CYX | 5 | 0.185  | -15.064 | 3.327 | 1.00 | 0.00 |
| ATOM | 76 | HA  | CYX | 5 | 1.202  | -15.260 | 3.666 | 1.00 | 0.00 |
| ATOM | 77 | CB  | CYX | 5 | 0.212  | -14.819 | 1.841 | 1.00 | 0.00 |
| ATOM | 78 | HB2 | CYX | 5 | -0.379 | -15.583 | 1.335 | 1.00 | 0.00 |
| ATOM | 79 | HB3 | CYX | 5 | -0.206 | -13.836 | 1.627 | 1.00 | 0.00 |
| ATOM | 80 | SG  | CYX | 5 | 1.878  | -14.897 | 1.115 | 1.00 | 0.00 |
| ATOM | 81 | C   | CYX | 5 | -0.327 | -13.858 | 4.045 | 1.00 | 0.00 |
| ATOM | 82 | O   | CYX | 5 | 0.429  | -13.101 | 4.571 | 1.00 | 0.00 |
| ATOM | 83 | N   | GLN | 6 | -1.637 | -13.667 | 4.168 | 1.00 | 0.00 |
| ATOM | 84 | H   | GLN | 6 | -2.251 | -14.305 | 3.681 | 1.00 | 0.00 |
| ATOM | 85 | CA  | GLN | 6 | -2.227 | -12.562 | 4.887 | 1.00 | 0.00 |
| ATOM | 86 | HA  | GLN | 6 | -1.816 | -11.622 | 4.519 | 1.00 | 0.00 |
| ATOM | 87 | CB  | GLN | 6 | -3.744 | -12.542 | 4.692 | 1.00 | 0.00 |
| ATOM | 88 | HB2 | GLN | 6 | -4.062 | -13.528 | 4.354 | 1.00 | 0.00 |
| ATOM | 89 | HB3 | GLN | 6 | -4.213 | -12.318 | 5.650 | 1.00 | 0.00 |
| ATOM | 90 | CG  | GLN | 6 | -4.160 | -11.495 | 3.666 | 1.00 | 0.00 |
| ATOM | 91 | HG2 | GLN | 6 | -3.246 | -10.990 | 3.353 | 1.00 | 0.00 |
| ATOM | 92 | HG3 | GLN | 6 | -4.634 | -11.957 | 2.800 | 1.00 | 0.00 |
| ATOM | 93 | CD  | GLN | 6 | -5.106 | -10.467 | 4.244 | 1.00 | 0.00 |
| ATOM | 94 | OE1 | GLN | 6 | -5.126 | -10.168 | 5.423 | 1.00 | 0.00 |

|      |     |          |   |        |         |        |      |      |
|------|-----|----------|---|--------|---------|--------|------|------|
| ATOM | 95  | NE2 GLN  | 6 | -5.968 | -9.949  | 3.380  | 1.00 | 0.00 |
| ATOM | 96  | HE21 GLN | 6 | -6.633 | -9.255  | 3.689  | 1.00 | 0.00 |
| ATOM | 97  | HE22 GLN | 6 | -5.955 | -10.251 | 2.416  | 1.00 | 0.00 |
| ATOM | 98  | C GLN    | 6 | -1.875 | -12.601 | 6.364  | 1.00 | 0.00 |
| ATOM | 99  | O GLN    | 6 | -2.120 | -11.654 | 7.092  | 1.00 | 0.00 |
| ATOM | 100 | N ARG    | 7 | -1.309 | -13.709 | 6.824  | 1.00 | 0.00 |
| ATOM | 101 | H ARG    | 7 | -1.185 | -14.459 | 6.158  | 1.00 | 0.00 |
| ATOM | 102 | CA ARG   | 7 | -0.898 | -13.929 | 8.178  | 1.00 | 0.00 |
| ATOM | 103 | HA ARG   | 7 | -1.303 | -13.138 | 8.809  | 1.00 | 0.00 |
| ATOM | 104 | CB ARG   | 7 | -1.393 | -15.279 | 8.707  | 1.00 | 0.00 |
| ATOM | 105 | HB2 ARG  | 7 | -2.198 | -15.638 | 8.065  | 1.00 | 0.00 |
| ATOM | 106 | HB3 ARG  | 7 | -0.568 | -15.992 | 8.687  | 1.00 | 0.00 |
| ATOM | 107 | CG ARG   | 7 | -1.908 | -15.137 | 10.136 | 1.00 | 0.00 |
| ATOM | 108 | HG2 ARG  | 7 | -1.180 | -14.570 | 10.715 | 1.00 | 0.00 |
| ATOM | 109 | HG3 ARG  | 7 | -2.855 | -14.597 | 10.114 | 1.00 | 0.00 |
| ATOM | 110 | CD ARG   | 7 | -2.118 | -16.510 | 10.784 | 1.00 | 0.00 |
| ATOM | 111 | HD2 ARG  | 7 | -3.112 | -16.886 | 10.539 | 1.00 | 0.00 |
| ATOM | 112 | HD3 ARG  | 7 | -1.366 | -17.210 | 10.418 | 1.00 | 0.00 |
| ATOM | 113 | NE ARG   | 7 | -1.998 | -16.411 | 12.253 | 1.00 | 0.00 |
| ATOM | 114 | HE ARG   | 7 | -2.860 | -16.319 | 12.771 | 1.00 | 0.00 |
| ATOM | 115 | CZ ARG   | 7 | -0.856 | -16.429 | 12.924 | 1.00 | 0.00 |
| ATOM | 116 | NH1 ARG  | 7 | 0.286  | -16.560 | 12.290 | 1.00 | 0.00 |

|      |     |      |     |   |        |         |        |      |      |
|------|-----|------|-----|---|--------|---------|--------|------|------|
| ATOM | 117 | HH11 | ARG | 7 | 0.294  | -16.648 | 11.284 | 1.00 | 0.00 |
| ATOM | 118 | HH12 | ARG | 7 | 1.151  | -16.573 | 12.811 | 1.00 | 0.00 |
| ATOM | 119 | NH2  | ARG | 7 | -0.854 | -16.322 | 14.231 | 1.00 | 0.00 |
| ATOM | 120 | HH21 | ARG | 7 | -1.728 | -16.226 | 14.728 | 1.00 | 0.00 |
| ATOM | 121 | HH22 | ARG | 7 | 0.021  | -16.337 | 14.734 | 1.00 | 0.00 |
| ATOM | 122 | C    | ARG | 7 | 0.603  | -13.875 | 8.279  | 1.00 | 0.00 |
| ATOM | 123 | O    | ARG | 7 | 1.079  | -13.882 | 9.387  | 1.00 | 0.00 |
| ATOM | 124 | N    | GLU | 8 | 1.299  | -13.863 | 7.155  | 1.00 | 0.00 |
| ATOM | 125 | H    | GLU | 8 | 0.801  | -13.956 | 6.281  | 1.00 | 0.00 |
| ATOM | 126 | CA   | GLU | 8 | 2.744  | -13.786 | 7.116  | 1.00 | 0.00 |
| ATOM | 127 | HA   | GLU | 8 | 3.146  | -13.828 | 8.128  | 1.00 | 0.00 |
| ATOM | 128 | CB   | GLU | 8 | 3.313  | -14.958 | 6.316  | 1.00 | 0.00 |
| ATOM | 129 | HB2  | GLU | 8 | 2.490  | -15.502 | 5.851  | 1.00 | 0.00 |
| ATOM | 130 | HB3  | GLU | 8 | 3.975  | -14.570 | 5.542  | 1.00 | 0.00 |
| ATOM | 131 | CG   | GLU | 8 | 4.098  | -15.905 | 7.231  | 1.00 | 0.00 |
| ATOM | 132 | HG2  | GLU | 8 | 3.754  | -15.710 | 8.246  | 1.00 | 0.00 |
| ATOM | 133 | HG3  | GLU | 8 | 3.906  | -16.948 | 6.977  | 1.00 | 0.00 |
| ATOM | 134 | CD   | GLU | 8 | 5.602  | -15.626 | 7.139  | 1.00 | 0.00 |
| ATOM | 135 | OE1  | GLU | 8 | 6.161  | -15.890 | 6.055  | 1.00 | 0.00 |
| ATOM | 136 | OE2  | GLU | 8 | 6.158  | -15.210 | 8.174  | 1.00 | 0.00 |
| ATOM | 137 | C    | GLU | 8 | 3.220  | -12.465 | 6.529  | 1.00 | 0.00 |
| ATOM | 138 | O    | GLU | 8 | 4.288  | -11.980 | 6.845  | 1.00 | 0.00 |

|      |     |     |     |    |        |         |       |      |      |
|------|-----|-----|-----|----|--------|---------|-------|------|------|
| ATOM | 139 | N   | PHE | 9  | 2.361  | -11.809 | 5.761 | 1.00 | 0.00 |
| ATOM | 140 | H   | PHE | 9  | 1.447  | -12.219 | 5.629 | 1.00 | 0.00 |
| ATOM | 141 | CA  | PHE | 9  | 2.646  | -10.567 | 5.116 | 1.00 | 0.00 |
| ATOM | 142 | HA  | PHE | 9  | 3.684  | -10.534 | 4.786 | 1.00 | 0.00 |
| ATOM | 143 | CB  | PHE | 9  | 1.742  | -10.431 | 3.895 | 1.00 | 0.00 |
| ATOM | 144 | HB2 | PHE | 9  | 2.217  | -10.927 | 3.048 | 1.00 | 0.00 |
| ATOM | 145 | HB3 | PHE | 9  | 0.771  | -10.889 | 4.086 | 1.00 | 0.00 |
| ATOM | 146 | CG  | PHE | 9  | 1.471  | -9.004  | 3.466 | 1.00 | 0.00 |
| ATOM | 147 | CD1 | PHE | 9  | 0.648  | -8.165  | 4.236 | 1.00 | 0.00 |
| ATOM | 148 | HD1 | PHE | 9  | 0.176  | -8.567  | 5.132 | 1.00 | 0.00 |
| ATOM | 149 | CE1 | PHE | 9  | 0.431  | -6.839  | 3.870 | 1.00 | 0.00 |
| ATOM | 150 | HE1 | PHE | 9  | -0.168 | -6.186  | 4.504 | 1.00 | 0.00 |
| ATOM | 151 | CZ  | PHE | 9  | 0.982  | -6.349  | 2.689 | 1.00 | 0.00 |
| ATOM | 152 | HZ  | PHE | 9  | 0.808  | -5.318  | 2.380 | 1.00 | 0.00 |
| ATOM | 153 | CE2 | PHE | 9  | 1.764  | -7.192  | 1.897 | 1.00 | 0.00 |
| ATOM | 154 | HE2 | PHE | 9  | 2.176  | -6.808  | 0.964 | 1.00 | 0.00 |
| ATOM | 155 | CD2 | PHE | 9  | 2.021  | -8.510  | 2.284 | 1.00 | 0.00 |
| ATOM | 156 | HD2 | PHE | 9  | 2.649  | -9.148  | 1.662 | 1.00 | 0.00 |
| ATOM | 157 | C   | PHE | 9  | 2.378  | -9.454  | 6.086 | 1.00 | 0.00 |
| ATOM | 158 | O   | PHE | 9  | 3.052  | -8.444  | 6.106 | 1.00 | 0.00 |
| ATOM | 159 | N   | GLN | 10 | 1.305  | -9.581  | 6.883 | 1.00 | 0.00 |
| ATOM | 160 | H   | GLN | 10 | 0.716  | -10.397 | 6.788 | 1.00 | 0.00 |

|      |     |      |     |    |        |         |        |      |      |
|------|-----|------|-----|----|--------|---------|--------|------|------|
| ATOM | 161 | CA   | GLN | 10 | 0.917  | -8.563  | 7.830  | 1.00 | 0.00 |
| ATOM | 162 | HA   | GLN | 10 | 1.371  | -7.612  | 7.551  | 1.00 | 0.00 |
| ATOM | 163 | CB   | GLN | 10 | -0.606 | -8.391  | 7.853  | 1.00 | 0.00 |
| ATOM | 164 | HB2  | GLN | 10 | -0.902 | -7.793  | 6.992  | 1.00 | 0.00 |
| ATOM | 165 | HB3  | GLN | 10 | -1.069 | -9.376  | 7.787  | 1.00 | 0.00 |
| ATOM | 166 | CG   | GLN | 10 | -1.065 | -7.695  | 9.142  | 1.00 | 0.00 |
| ATOM | 167 | HG2  | GLN | 10 | -0.917 | -8.354  | 9.997  | 1.00 | 0.00 |
| ATOM | 168 | HG3  | GLN | 10 | -0.464 | -6.795  | 9.269  | 1.00 | 0.00 |
| ATOM | 169 | CD   | GLN | 10 | -2.516 | -7.300  | 9.084  | 1.00 | 0.00 |
| ATOM | 170 | OE1  | GLN | 10 | -2.885 | -6.303  | 8.484  | 1.00 | 0.00 |
| ATOM | 171 | NE2  | GLN | 10 | -3.355 | -8.115  | 9.697  | 1.00 | 0.00 |
| ATOM | 172 | HE21 | GLN | 10 | -4.344 | -7.910  | 9.697  | 1.00 | 0.00 |
| ATOM | 173 | HE22 | GLN | 10 | -3.004 | -8.940  | 10.163 | 1.00 | 0.00 |
| ATOM | 174 | C    | GLN | 10 | 1.460  | -8.934  | 9.204  | 1.00 | 0.00 |
| ATOM | 175 | O    | GLN | 10 | 1.443  | -8.126  | 10.131 | 1.00 | 0.00 |
| ATOM | 176 | N    | GLN | 11 | 1.929  | -10.166 | 9.362  | 1.00 | 0.00 |
| ATOM | 177 | H    | GLN | 11 | 1.885  | -10.818 | 8.591  | 1.00 | 0.00 |
| ATOM | 178 | CA   | GLN | 11 | 2.459  | -10.629 | 10.618 | 1.00 | 0.00 |
| ATOM | 179 | HA   | GLN | 11 | 1.654  | -10.729 | 11.346 | 1.00 | 0.00 |
| ATOM | 180 | CB   | GLN | 11 | 3.128  | -11.987 | 10.442 | 1.00 | 0.00 |
| ATOM | 181 | HB2  | GLN | 11 | 2.800  | -12.424 | 9.498  | 1.00 | 0.00 |
| ATOM | 182 | HB3  | GLN | 11 | 4.209  | -11.849 | 10.422 | 1.00 | 0.00 |

|      |     |      |     |    |       |         |        |      |      |
|------|-----|------|-----|----|-------|---------|--------|------|------|
| ATOM | 183 | CG   | GLN | 11 | 2.755 | -12.924 | 11.594 | 1.00 | 0.00 |
| ATOM | 184 | HG2  | GLN | 11 | 1.936 | -12.453 | 12.137 | 1.00 | 0.00 |
| ATOM | 185 | HG3  | GLN | 11 | 2.430 | -13.895 | 11.219 | 1.00 | 0.00 |
| ATOM | 186 | CD   | GLN | 11 | 3.911 | -13.136 | 12.550 | 1.00 | 0.00 |
| ATOM | 187 | OE1  | GLN | 11 | 5.065 | -13.175 | 12.182 | 1.00 | 0.00 |
| ATOM | 188 | NE2  | GLN | 11 | 3.571 | -13.328 | 13.814 | 1.00 | 0.00 |
| ATOM | 189 | HE21 | GLN | 11 | 4.288 | -13.477 | 14.510 | 1.00 | 0.00 |
| ATOM | 190 | HE22 | GLN | 11 | 2.596 | -13.326 | 14.077 | 1.00 | 0.00 |
| ATOM | 191 | C    | GLN | 11 | 3.447 | -9.628  | 11.186 | 1.00 | 0.00 |
| ATOM | 192 | O    | GLN | 11 | 3.248 | -9.113  | 12.282 | 1.00 | 0.00 |
| ATOM | 193 | N    | GLU | 12 | 4.437 | -9.259  | 10.372 | 1.00 | 0.00 |
| ATOM | 194 | H    | GLU | 12 | 4.507 | -9.672  | 9.453  | 1.00 | 0.00 |
| ATOM | 195 | CA   | GLU | 12 | 5.481 | -8.344  | 10.797 | 1.00 | 0.00 |
| ATOM | 196 | HA   | GLU | 12 | 5.034 | -7.372  | 11.006 | 1.00 | 0.00 |
| ATOM | 197 | CB   | GLU | 12 | 6.207 | -8.832  | 12.060 | 1.00 | 0.00 |
| ATOM | 198 | HB2  | GLU | 12 | 7.231 | -8.459  | 12.034 | 1.00 | 0.00 |
| ATOM | 199 | HB3  | GLU | 12 | 5.694 | -8.424  | 12.931 | 1.00 | 0.00 |
| ATOM | 200 | CG   | GLU | 12 | 6.223 | -10.361 | 12.148 | 1.00 | 0.00 |
| ATOM | 201 | HG2  | GLU | 12 | 5.324 | -10.727 | 12.644 | 1.00 | 0.00 |
| ATOM | 202 | HG3  | GLU | 12 | 6.242 | -10.722 | 11.119 | 1.00 | 0.00 |
| ATOM | 203 | CD   | GLU | 12 | 7.449 | -10.869 | 12.884 | 1.00 | 0.00 |
| ATOM | 204 | OE1  | GLU | 12 | 8.499 | -11.008 | 12.216 | 1.00 | 0.00 |



|      |     |      |     |    |        |         |        |      |      |
|------|-----|------|-----|----|--------|---------|--------|------|------|
| ATOM | 205 | OE2  | GLU | 12 | 7.338  | -11.060 | 14.119 | 1.00 | 0.00 |
| ATOM | 206 | C    | GLU | 12 | 6.467  | -8.104  | 9.662  | 1.00 | 0.00 |
| ATOM | 207 | O    | GLU | 12 | 7.652  | -7.868  | 9.868  | 1.00 | 0.00 |
| ATOM | 208 | N    | GLN | 13 | 5.958  | -8.121  | 8.431  | 1.00 | 0.00 |
| ATOM | 209 | H    | GLN | 13 | 4.981  | -8.342  | 8.299  | 1.00 | 0.00 |
| ATOM | 210 | CA   | GLN | 13 | 6.775  | -7.908  | 7.261  | 1.00 | 0.00 |
| ATOM | 211 | HA   | GLN | 13 | 7.519  | -7.139  | 7.467  | 1.00 | 0.00 |
| ATOM | 212 | CB   | GLN | 13 | 7.501  | -9.197  | 6.866  | 1.00 | 0.00 |
| ATOM | 213 | HB2  | GLN | 13 | 6.922  | -10.051 | 7.219  | 1.00 | 0.00 |
| ATOM | 214 | HB3  | GLN | 13 | 7.583  | -9.238  | 5.780  | 1.00 | 0.00 |
| ATOM | 215 | CG   | GLN | 13 | 8.897  | -9.239  | 7.483  | 1.00 | 0.00 |
| ATOM | 216 | HG2  | GLN | 13 | 9.381  | -8.263  | 7.474  | 1.00 | 0.00 |
| ATOM | 217 | HG3  | GLN | 13 | 8.767  | -9.570  | 8.513  | 1.00 | 0.00 |
| ATOM | 218 | CD   | GLN | 13 | 9.793  | -10.231 | 6.765  | 1.00 | 0.00 |
| ATOM | 219 | OE1  | GLN | 13 | 9.716  | -10.456 | 5.566  | 1.00 | 0.00 |
| ATOM | 220 | NE2  | GLN | 13 | 10.730 | -10.796 | 7.509  | 1.00 | 0.00 |
| ATOM | 221 | HE21 | GLN | 13 | 11.362 | -11.467 | 7.096  | 1.00 | 0.00 |
| ATOM | 222 | HE22 | GLN | 13 | 10.808 | -10.554 | 8.486  | 1.00 | 0.00 |
| ATOM | 223 | C    | GLN | 13 | 5.933  | -7.385  | 6.129  | 1.00 | 0.00 |
| ATOM | 224 | O    | GLN | 13 | 5.952  | -7.921  | 5.060  | 1.00 | 0.00 |
| ATOM | 225 | N    | HIE | 14 | 5.149  | -6.339  | 6.383  | 1.00 | 0.00 |
| ATOM | 226 | H    | HIE | 14 | 5.129  | -5.974  | 7.324  | 1.00 | 0.00 |

|      |     |     |     |    |       |        |        |      |      |
|------|-----|-----|-----|----|-------|--------|--------|------|------|
| ATOM | 227 | CA  | HIE | 14 | 4.254 | -5.760 | 5.403  | 1.00 | 0.00 |
| ATOM | 228 | HA  | HIE | 14 | 3.646 | -6.546 | 4.955  | 1.00 | 0.00 |
| ATOM | 229 | CB  | HIE | 14 | 3.324 | -4.731 | 6.052  | 1.00 | 0.00 |
| ATOM | 230 | HB2 | HIE | 14 | 3.786 | -3.744 | 6.057  | 1.00 | 0.00 |
| ATOM | 231 | HB3 | HIE | 14 | 2.403 | -4.698 | 5.469  | 1.00 | 0.00 |
| ATOM | 232 | CG  | HIE | 14 | 2.925 | -5.025 | 7.468  | 1.00 | 0.00 |
| ATOM | 233 | ND1 | HIE | 14 | 2.373 | -4.097 | 8.316  | 1.00 | 0.00 |
| ATOM | 234 | CE1 | HIE | 14 | 2.149 | -4.682 | 9.500  | 1.00 | 0.00 |
| ATOM | 235 | HE1 | HIE | 14 | 1.685 | -4.131 | 10.318 | 1.00 | 0.00 |
| ATOM | 236 | NE2 | HIE | 14 | 2.582 | -5.943 | 9.428  | 1.00 | 0.00 |
| ATOM | 237 | HE2 | HIE | 14 | 2.567 | -6.615 | 10.182 | 1.00 | 0.00 |
| ATOM | 238 | CD2 | HIE | 14 | 3.053 | -6.189 | 8.167  | 1.00 | 0.00 |
| ATOM | 239 | HD2 | HIE | 14 | 3.430 | -7.179 | 7.909  | 1.00 | 0.00 |
| ATOM | 240 | C   | HIE | 14 | 5.100 | -5.178 | 4.280  | 1.00 | 0.00 |
| ATOM | 241 | O   | HIE | 14 | 6.210 | -5.589 | 3.982  | 1.00 | 0.00 |
| ATOM | 242 | N   | LEU | 15 | 4.602 | -4.101 | 3.675  | 1.00 | 0.00 |
| ATOM | 243 | H   | LEU | 15 | 3.673 | -3.782 | 3.908  | 1.00 | 0.00 |
| ATOM | 244 | CA  | LEU | 15 | 5.305 | -3.436 | 2.602  | 1.00 | 0.00 |
| ATOM | 245 | HA  | LEU | 15 | 6.305 | -3.855 | 2.495  | 1.00 | 0.00 |
| ATOM | 246 | CB  | LEU | 15 | 4.550 | -3.627 | 1.280  | 1.00 | 0.00 |
| ATOM | 247 | HB2 | LEU | 15 | 3.722 | -2.924 | 1.367  | 1.00 | 0.00 |
| ATOM | 248 | HB3 | LEU | 15 | 5.187 | -3.335 | 0.445  | 1.00 | 0.00 |

|      |     |      |     |    |       |        |        |      |      |
|------|-----|------|-----|----|-------|--------|--------|------|------|
| ATOM | 249 | CG   | LEU | 15 | 4.000 | -5.035 | 1.034  | 1.00 | 0.00 |
| ATOM | 250 | HG   | LEU | 15 | 3.144 | -5.198 | 1.689  | 1.00 | 0.00 |
| ATOM | 251 | CD1  | LEU | 15 | 3.567 | -5.202 | -0.418 | 1.00 | 0.00 |
| ATOM | 252 | HD11 | LEU | 15 | 4.422 | -5.040 | -1.074 | 1.00 | 0.00 |
| ATOM | 253 | HD12 | LEU | 15 | 3.180 | -6.210 | -0.569 | 1.00 | 0.00 |
| ATOM | 254 | HD13 | LEU | 15 | 2.788 | -4.476 | -0.652 | 1.00 | 0.00 |
| ATOM | 255 | CD2  | LEU | 15 | 4.985 | -6.099 | 1.426  | 1.00 | 0.00 |
| ATOM | 256 | HD21 | LEU | 15 | 5.219 | -6.006 | 2.486  | 1.00 | 0.00 |
| ATOM | 257 | HD22 | LEU | 15 | 4.554 | -7.082 | 1.235  | 1.00 | 0.00 |
| ATOM | 258 | HD23 | LEU | 15 | 5.898 | -5.983 | 0.841  | 1.00 | 0.00 |
| ATOM | 259 | C    | LEU | 15 | 5.532 | -1.986 | 2.958  | 1.00 | 0.00 |
| ATOM | 260 | O    | LEU | 15 | 4.939 | -1.488 | 3.921  | 1.00 | 0.00 |
| ATOM | 261 | N    | ARG | 16 | 6.344 | -1.296 | 2.156  | 1.00 | 0.00 |
| ATOM | 262 | H    | ARG | 16 | 6.759 | -1.754 | 1.357  | 1.00 | 0.00 |
| ATOM | 263 | CA   | ARG | 16 | 6.653 | 0.096  | 2.384  | 1.00 | 0.00 |
| ATOM | 264 | HA   | ARG | 16 | 5.794 | 0.589  | 2.840  | 1.00 | 0.00 |
| ATOM | 265 | CB   | ARG | 16 | 7.854 | 0.248  | 3.315  | 1.00 | 0.00 |
| ATOM | 266 | HB2  | ARG | 16 | 8.558 | -0.558 | 3.109  | 1.00 | 0.00 |
| ATOM | 267 | HB3  | ARG | 16 | 8.331 | 1.207  | 3.114  | 1.00 | 0.00 |
| ATOM | 268 | CG   | ARG | 16 | 7.426 | 0.189  | 4.782  | 1.00 | 0.00 |
| ATOM | 269 | HG2  | ARG | 16 | 6.355 | -0.008 | 4.825  | 1.00 | 0.00 |
| ATOM | 270 | HG3  | ARG | 16 | 7.964 | -0.624 | 5.270  | 1.00 | 0.00 |

|      |     |      |     |    |        |        |        |      |      |
|------|-----|------|-----|----|--------|--------|--------|------|------|
| ATOM | 271 | CD   | ARG | 16 | 7.732  | 1.506  | 5.498  | 1.00 | 0.00 |
| ATOM | 272 | HD2  | ARG | 16 | 7.700  | 2.326  | 4.781  | 1.00 | 0.00 |
| ATOM | 273 | HD3  | ARG | 16 | 6.991  | 1.677  | 6.278  | 1.00 | 0.00 |
| ATOM | 274 | NE   | ARG | 16 | 9.071  | 1.471  | 6.117  | 1.00 | 0.00 |
| ATOM | 275 | HE   | ARG | 16 | 9.708  | 0.773  | 5.761  | 1.00 | 0.00 |
| ATOM | 276 | CZ   | ARG | 16 | 9.489  | 2.275  | 7.077  | 1.00 | 0.00 |
| ATOM | 277 | NH1  | ARG | 16 | 8.694  | 3.203  | 7.559  | 1.00 | 0.00 |
| ATOM | 278 | HH11 | ARG | 16 | 7.758  | 3.301  | 7.193  | 1.00 | 0.00 |
| ATOM | 279 | HH12 | ARG | 16 | 9.023  | 3.813  | 8.293  | 1.00 | 0.00 |
| ATOM | 280 | NH2  | ARG | 16 | 10.699 | 2.151  | 7.565  | 1.00 | 0.00 |
| ATOM | 281 | HH21 | ARG | 16 | 11.315 | 1.436  | 7.204  | 1.00 | 0.00 |
| ATOM | 282 | HH22 | ARG | 16 | 11.010 | 2.770  | 8.299  | 1.00 | 0.00 |
| ATOM | 283 | C    | ARG | 16 | 6.975  | 0.750  | 1.089  | 1.00 | 0.00 |
| ATOM | 284 | O    | ARG | 16 | 6.157  | 1.485  | 0.606  | 1.00 | 0.00 |
| ATOM | 285 | N    | ALA | 17 | 8.111  | 0.463  | 0.491  | 1.00 | 0.00 |
| ATOM | 286 | H    | ALA | 17 | 8.771  | -0.126 | 0.978  | 1.00 | 0.00 |
| ATOM | 287 | CA   | ALA | 17 | 8.498  | 1.014  | -0.781 | 1.00 | 0.00 |
| ATOM | 288 | HA   | ALA | 17 | 8.655  | 2.086  | -0.666 | 1.00 | 0.00 |
| ATOM | 289 | CB   | ALA | 17 | 9.814  | 0.373  | -1.246 | 1.00 | 0.00 |
| ATOM | 290 | HB1  | ALA | 17 | 9.671  | -0.700 | -1.375 | 1.00 | 0.00 |
| ATOM | 291 | HB2  | ALA | 17 | 10.118 | 0.814  | -2.195 | 1.00 | 0.00 |
| ATOM | 292 | HB3  | ALA | 17 | 10.588 | 0.548  | -0.499 | 1.00 | 0.00 |

|      |     |     |     |    |       |        |        |      |      |
|------|-----|-----|-----|----|-------|--------|--------|------|------|
| ATOM | 293 | C   | ALA | 17 | 7.374 | 0.840  | -1.821 | 1.00 | 0.00 |
| ATOM | 294 | O   | ALA | 17 | 7.276 | 1.583  | -2.788 | 1.00 | 0.00 |
| ATOM | 295 | N   | CYX | 18 | 6.435 | -0.076 | -1.563 | 1.00 | 0.00 |
| ATOM | 296 | H   | CYX | 18 | 6.536 | -0.634 | -0.727 | 1.00 | 0.00 |
| ATOM | 297 | CA  | CYX | 18 | 5.338 | -0.350 | -2.429 | 1.00 | 0.00 |
| ATOM | 298 | HA  | CYX | 18 | 5.625 | -0.133 | -3.458 | 1.00 | 0.00 |
| ATOM | 299 | CB  | CYX | 18 | 4.917 | -1.811 | -2.340 | 1.00 | 0.00 |
| ATOM | 300 | HB2 | CYX | 18 | 5.727 | -2.397 | -1.905 | 1.00 | 0.00 |
| ATOM | 301 | HB3 | CYX | 18 | 4.030 | -1.897 | -1.713 | 1.00 | 0.00 |
| ATOM | 302 | SG  | CYX | 18 | 4.555 | -2.606 | -3.923 | 1.00 | 0.00 |
| ATOM | 303 | C   | CYX | 18 | 4.224 | 0.584  | -2.050 | 1.00 | 0.00 |
| ATOM | 304 | O   | CYX | 18 | 3.668 | 1.282  | -2.880 | 1.00 | 0.00 |
| ATOM | 305 | N   | GLN | 19 | 3.895 | 0.630  | -0.762 | 1.00 | 0.00 |
| ATOM | 306 | H   | GLN | 19 | 4.328 | -0.019 | -0.121 | 1.00 | 0.00 |
| ATOM | 307 | CA  | GLN | 19 | 2.880 | 1.510  | -0.257 | 1.00 | 0.00 |
| ATOM | 308 | HA  | GLN | 19 | 2.162 | 1.747  | -1.042 | 1.00 | 0.00 |
| ATOM | 309 | CB  | GLN | 19 | 2.145 | 0.837  | 0.884  | 1.00 | 0.00 |
| ATOM | 310 | HB2 | GLN | 19 | 1.323 | 1.489  | 1.178  | 1.00 | 0.00 |
| ATOM | 311 | HB3 | GLN | 19 | 1.744 | -0.105 | 0.509  | 1.00 | 0.00 |
| ATOM | 312 | CG  | GLN | 19 | 3.034 | 0.565  | 2.091  | 1.00 | 0.00 |
| ATOM | 313 | HG2 | GLN | 19 | 2.854 | -0.451 | 2.444  | 1.00 | 0.00 |
| ATOM | 314 | HG3 | GLN | 19 | 4.080 | 0.669  | 1.803  | 1.00 | 0.00 |

|      |     |      |     |    |       |       |        |      |      |
|------|-----|------|-----|----|-------|-------|--------|------|------|
| ATOM | 315 | CD   | GLN | 19 | 2.744 | 1.534 | 3.228  | 1.00 | 0.00 |
| ATOM | 316 | OE1  | GLN | 19 | 3.630 | 2.166 | 3.803  | 1.00 | 0.00 |
| ATOM | 317 | NE2  | GLN | 19 | 1.469 | 1.655 | 3.570  | 1.00 | 0.00 |
| ATOM | 318 | HE21 | GLN | 19 | 1.207 | 2.281 | 4.317  | 1.00 | 0.00 |
| ATOM | 319 | HE22 | GLN | 19 | 0.765 | 1.120 | 3.081  | 1.00 | 0.00 |
| ATOM | 320 | C    | GLN | 19 | 3.463 | 2.837 | 0.159  | 1.00 | 0.00 |
| ATOM | 321 | O    | GLN | 19 | 2.967 | 3.451 | 1.074  | 1.00 | 0.00 |
| ATOM | 322 | N    | GLN | 20 | 4.546 | 3.278 | -0.458 | 1.00 | 0.00 |
| ATOM | 323 | H    | GLN | 20 | 4.925 | 2.710 | -1.203 | 1.00 | 0.00 |
| ATOM | 324 | CA   | GLN | 20 | 5.236 | 4.495 | -0.107 | 1.00 | 0.00 |
| ATOM | 325 | HA   | GLN | 20 | 4.590 | 5.089 | 0.539  | 1.00 | 0.00 |
| ATOM | 326 | CB   | GLN | 20 | 6.555 | 4.236 | 0.625  | 1.00 | 0.00 |
| ATOM | 327 | HB2  | GLN | 20 | 7.113 | 3.476 | 0.078  | 1.00 | 0.00 |
| ATOM | 328 | HB3  | GLN | 20 | 7.129 | 5.162 | 0.647  | 1.00 | 0.00 |
| ATOM | 329 | CG   | GLN | 20 | 6.307 | 3.754 | 2.062  | 1.00 | 0.00 |
| ATOM | 330 | HG2  | GLN | 20 | 5.345 | 3.244 | 2.123  | 1.00 | 0.00 |
| ATOM | 331 | HG3  | GLN | 20 | 7.105 | 3.055 | 2.315  | 1.00 | 0.00 |
| ATOM | 332 | CD   | GLN | 20 | 6.319 | 4.878 | 3.059  | 1.00 | 0.00 |
| ATOM | 333 | OE1  | GLN | 20 | 6.879 | 5.940 | 2.856  | 1.00 | 0.00 |
| ATOM | 334 | NE2  | GLN | 20 | 5.650 | 4.667 | 4.181  | 1.00 | 0.00 |
| ATOM | 335 | HE21 | GLN | 20 | 5.621 | 5.385 | 4.890  | 1.00 | 0.00 |
| ATOM | 336 | HE22 | GLN | 20 | 5.172 | 3.788 | 4.322  | 1.00 | 0.00 |

|      |     |     |     |    |       |       |        |      |      |
|------|-----|-----|-----|----|-------|-------|--------|------|------|
| ATOM | 337 | C   | GLN | 20 | 5.500 | 5.283 | -1.364 | 1.00 | 0.00 |
| ATOM | 338 | O   | GLN | 20 | 5.317 | 6.491 | -1.388 | 1.00 | 0.00 |
| ATOM | 339 | N   | TRP | 21 | 5.876 | 4.596 | -2.443 | 1.00 | 0.00 |
| ATOM | 340 | H   | TRP | 21 | 6.042 | 3.602 | -2.373 | 1.00 | 0.00 |
| ATOM | 341 | CA  | TRP | 21 | 6.121 | 5.245 | -3.713 | 1.00 | 0.00 |
| ATOM | 342 | HA  | TRP | 21 | 6.884 | 6.014 | -3.595 | 1.00 | 0.00 |
| ATOM | 343 | CB  | TRP | 21 | 6.608 | 4.229 | -4.745 | 1.00 | 0.00 |
| ATOM | 344 | HB2 | TRP | 21 | 7.110 | 4.742 | -5.565 | 1.00 | 0.00 |
| ATOM | 345 | HB3 | TRP | 21 | 7.311 | 3.556 | -4.254 | 1.00 | 0.00 |
| ATOM | 346 | CG  | TRP | 21 | 5.553 | 3.370 | -5.361 | 1.00 | 0.00 |
| ATOM | 347 | CD1 | TRP | 21 | 5.208 | 2.101 | -5.053 | 1.00 | 0.00 |
| ATOM | 348 | HD1 | TRP | 21 | 5.795 | 1.645 | -4.256 | 1.00 | 0.00 |
| ATOM | 349 | NE1 | TRP | 21 | 4.162 | 1.644 | -5.833 | 1.00 | 0.00 |
| ATOM | 350 | HE1 | TRP | 21 | 3.723 | 0.737 | -5.756 | 1.00 | 0.00 |
| ATOM | 351 | CE2 | TRP | 21 | 3.794 | 2.635 | -6.708 | 1.00 | 0.00 |
| ATOM | 352 | CZ2 | TRP | 21 | 2.807 | 2.710 | -7.689 | 1.00 | 0.00 |
| ATOM | 353 | HZ2 | TRP | 21 | 2.185 | 1.829 | -7.851 | 1.00 | 0.00 |
| ATOM | 354 | CH2 | TRP | 21 | 2.674 | 3.900 | -8.402 | 1.00 | 0.00 |
| ATOM | 355 | HH2 | TRP | 21 | 1.931 | 3.985 | -9.195 | 1.00 | 0.00 |
| ATOM | 356 | CZ3 | TRP | 21 | 3.490 | 5.004 | -8.113 | 1.00 | 0.00 |
| ATOM | 357 | HZ3 | TRP | 21 | 3.344 | 5.945 | -8.643 | 1.00 | 0.00 |
| ATOM | 358 | CE3 | TRP | 21 | 4.504 | 4.942 | -7.152 | 1.00 | 0.00 |

|      |     |          |    |        |       |        |      |      |
|------|-----|----------|----|--------|-------|--------|------|------|
| ATOM | 359 | HE3 TRP  | 21 | 5.135  | 5.817 | -7.000 | 1.00 | 0.00 |
| ATOM | 360 | CD2 TRP  | 21 | 4.658  | 3.748 | -6.419 | 1.00 | 0.00 |
| ATOM | 361 | C TRP    | 21 | 4.846  | 5.939 | -4.160 | 1.00 | 0.00 |
| ATOM | 362 | O TRP    | 21 | 4.863  | 7.009 | -4.757 | 1.00 | 0.00 |
| ATOM | 363 | N ILE    | 22 | 3.695  | 5.339 | -3.833 | 1.00 | 0.00 |
| ATOM | 364 | H ILE    | 22 | 3.721  | 4.455 | -3.345 | 1.00 | 0.00 |
| ATOM | 365 | CA ILE   | 22 | 2.406  | 5.879 | -4.204 | 1.00 | 0.00 |
| ATOM | 366 | HA ILE   | 22 | 2.393  | 6.208 | -5.243 | 1.00 | 0.00 |
| ATOM | 367 | CB ILE   | 22 | 1.311  | 4.827 | -3.988 | 1.00 | 0.00 |
| ATOM | 368 | HB ILE   | 22 | 1.257  | 4.579 | -2.928 | 1.00 | 0.00 |
| ATOM | 369 | CG2 ILE  | 22 | -0.043 | 5.371 | -4.454 | 1.00 | 0.00 |
| ATOM | 370 | HG21 ILE | 22 | 0.010  | 5.618 | -5.514 | 1.00 | 0.00 |
| ATOM | 371 | HG22 ILE | 22 | -0.813 | 4.615 | -4.296 | 1.00 | 0.00 |
| ATOM | 372 | HG23 ILE | 22 | -0.291 | 6.266 | -3.884 | 1.00 | 0.00 |
| ATOM | 373 | CG1 ILE  | 22 | 1.657  | 3.526 | -4.719 | 1.00 | 0.00 |
| ATOM | 374 | HG12 ILE | 22 | 1.392  | 3.638 | -5.771 | 1.00 | 0.00 |
| ATOM | 375 | HG13 ILE | 22 | 2.730  | 3.354 | -4.631 | 1.00 | 0.00 |
| ATOM | 376 | CD1 ILE  | 22 | 0.902  | 2.339 | -4.129 | 1.00 | 0.00 |
| ATOM | 377 | HD11 ILE | 22 | -0.171 | 2.510 | -4.217 | 1.00 | 0.00 |
| ATOM | 378 | HD12 ILE | 22 | 1.170  | 1.431 | -4.671 | 1.00 | 0.00 |
| ATOM | 379 | HD13 ILE | 22 | 1.166  | 2.225 | -3.078 | 1.00 | 0.00 |
| ATOM | 380 | C ILE    | 22 | 2.159  | 7.130 | -3.385 | 1.00 | 0.00 |



|      |     |      |     |    |       |       |        |      |      |
|------|-----|------|-----|----|-------|-------|--------|------|------|
| ATOM | 381 | O    | ILE | 22 | 1.521 | 8.068 | -3.839 | 1.00 | 0.00 |
| ATOM | 382 | N    | ARG | 23 | 2.681 | 7.168 | -2.153 | 1.00 | 0.00 |
| ATOM | 383 | H    | ARG | 23 | 3.140 | 6.344 | -1.790 | 1.00 | 0.00 |
| ATOM | 384 | CA   | ARG | 23 | 2.581 | 8.329 | -1.299 | 1.00 | 0.00 |
| ATOM | 385 | HA   | ARG | 23 | 1.543 | 8.659 | -1.255 | 1.00 | 0.00 |
| ATOM | 386 | CB   | ARG | 23 | 3.051 | 8.014 | 0.114  | 1.00 | 0.00 |
| ATOM | 387 | HB2  | ARG | 23 | 3.828 | 7.251 | 0.065  | 1.00 | 0.00 |
| ATOM | 388 | HB3  | ARG | 23 | 3.460 | 8.920 | 0.559  | 1.00 | 0.00 |
| ATOM | 389 | CG   | ARG | 23 | 1.894 | 7.506 | 0.968  | 1.00 | 0.00 |
| ATOM | 390 | HG2  | ARG | 23 | 2.046 | 7.831 | 1.997  | 1.00 | 0.00 |
| ATOM | 391 | HG3  | ARG | 23 | 0.964 | 7.928 | 0.588  | 1.00 | 0.00 |
| ATOM | 392 | CD   | ARG | 23 | 1.817 | 5.985 | 0.923  | 1.00 | 0.00 |
| ATOM | 393 | HD2  | ARG | 23 | 0.895 | 5.670 | 0.434  | 1.00 | 0.00 |
| ATOM | 394 | HD3  | ARG | 23 | 2.671 | 5.582 | 0.379  | 1.00 | 0.00 |
| ATOM | 395 | NE   | ARG | 23 | 1.833 | 5.440 | 2.308  | 1.00 | 0.00 |
| ATOM | 396 | HE   | ARG | 23 | 1.049 | 4.850 | 2.549  | 1.00 | 0.00 |
| ATOM | 397 | CZ   | ARG | 23 | 2.791 | 5.594 | 3.186  | 1.00 | 0.00 |
| ATOM | 398 | NH1  | ARG | 23 | 3.818 | 6.347 | 2.884  | 1.00 | 0.00 |
| ATOM | 399 | HH11 | ARG | 23 | 3.861 | 6.799 | 1.982  | 1.00 | 0.00 |
| ATOM | 400 | HH12 | ARG | 23 | 4.563 | 6.472 | 3.554  | 1.00 | 0.00 |
| ATOM | 401 | NH2  | ARG | 23 | 2.690 | 5.074 | 4.383  | 1.00 | 0.00 |
| ATOM | 402 | HH21 | ARG | 23 | 1.865 | 4.548 | 4.634  | 1.00 | 0.00 |

|      |     |      |     |    |       |        |        |      |      |
|------|-----|------|-----|----|-------|--------|--------|------|------|
| ATOM | 403 | HH22 | ARG | 23 | 3.437 | 5.201  | 5.050  | 1.00 | 0.00 |
| ATOM | 404 | C    | ARG | 23 | 3.396 | 9.499  | -1.845 | 1.00 | 0.00 |
| ATOM | 405 | O    | ARG | 23 | 3.182 | 10.646 | -1.452 | 1.00 | 0.00 |
| ATOM | 406 | N    | GLN | 24 | 4.331 | 9.208  | -2.743 | 1.00 | 0.00 |
| ATOM | 407 | H    | GLN | 24 | 4.518 | 8.242  | -2.972 | 1.00 | 0.00 |
| ATOM | 408 | CA   | GLN | 24 | 5.137 | 10.225 | -3.365 | 1.00 | 0.00 |
| ATOM | 409 | HA   | GLN | 24 | 5.354 | 11.018 | -2.649 | 1.00 | 0.00 |
| ATOM | 410 | CB   | GLN | 24 | 6.457 | 9.628  | -3.846 | 1.00 | 0.00 |
| ATOM | 411 | HB2  | GLN | 24 | 6.331 | 8.554  | -3.983 | 1.00 | 0.00 |
| ATOM | 412 | HB3  | GLN | 24 | 6.727 | 10.086 | -4.798 | 1.00 | 0.00 |
| ATOM | 413 | CG   | GLN | 24 | 7.566 | 9.884  | -2.825 | 1.00 | 0.00 |
| ATOM | 414 | HG2  | GLN | 24 | 8.283 | 10.589 | -3.245 | 1.00 | 0.00 |
| ATOM | 415 | HG3  | GLN | 24 | 7.121 | 10.311 | -1.927 | 1.00 | 0.00 |
| ATOM | 416 | CD   | GLN | 24 | 8.300 | 8.615  | -2.445 | 1.00 | 0.00 |
| ATOM | 417 | OE1  | GLN | 24 | 8.325 | 7.646  | -3.176 | 1.00 | 0.00 |
| ATOM | 418 | NE2  | GLN | 24 | 8.916 | 8.617  | -1.284 | 1.00 | 0.00 |
| ATOM | 419 | HE21 | GLN | 24 | 9.421 | 7.796  | -0.982 | 1.00 | 0.00 |
| ATOM | 420 | HE22 | GLN | 24 | 8.882 | 9.439  | -0.699 | 1.00 | 0.00 |
| ATOM | 421 | C    | GLN | 24 | 4.401 | 10.883 | -4.519 | 1.00 | 0.00 |
| ATOM | 422 | O    | GLN | 24 | 4.830 | 11.912 | -5.028 | 1.00 | 0.00 |
| ATOM | 423 | N    | GLN | 25 | 3.289 | 10.265 | -4.945 | 1.00 | 0.00 |
| ATOM | 424 | H    | GLN | 25 | 3.030 | 9.371  | -4.553 | 1.00 | 0.00 |

|      |     |      |     |    |        |        |         |      |      |
|------|-----|------|-----|----|--------|--------|---------|------|------|
| ATOM | 425 | CA   | GLN | 25 | 2.479  | 10.806 | -6.009  | 1.00 | 0.00 |
| ATOM | 426 | HA   | GLN | 25 | 3.116  | 11.134 | -6.830  | 1.00 | 0.00 |
| ATOM | 427 | CB   | GLN | 25 | 1.512  | 9.741  | -6.535  | 1.00 | 0.00 |
| ATOM | 428 | HB2  | GLN | 25 | 1.605  | 8.843  | -5.925  | 1.00 | 0.00 |
| ATOM | 429 | HB3  | GLN | 25 | 0.493  | 10.121 | -6.468  | 1.00 | 0.00 |
| ATOM | 430 | CG   | GLN | 25 | 1.834  | 9.403  | -7.990  | 1.00 | 0.00 |
| ATOM | 431 | HG2  | GLN | 25 | 2.915  | 9.268  | -8.012  | 1.00 | 0.00 |
| ATOM | 432 | HG3  | GLN | 25 | 1.348  | 8.488  | -8.330  | 1.00 | 0.00 |
| ATOM | 433 | CD   | GLN | 25 | 1.466  | 10.530 | -8.939  | 1.00 | 0.00 |
| ATOM | 434 | OE1  | GLN | 25 | 0.974  | 11.572 | -8.586  | 1.00 | 0.00 |
| ATOM | 435 | NE2  | GLN | 25 | 1.616  | 10.284 | -10.223 | 1.00 | 0.00 |
| ATOM | 436 | HE21 | GLN | 25 | 1.387  | 10.997 | -10.901 | 1.00 | 0.00 |
| ATOM | 437 | HE22 | GLN | 25 | 1.960  | 9.383  | -10.525 | 1.00 | 0.00 |
| ATOM | 438 | C    | GLN | 25 | 1.727  | 12.048 | -5.535  | 1.00 | 0.00 |
| ATOM | 439 | O    | GLN | 25 | 1.114  | 12.779 | -6.301  | 1.00 | 0.00 |
| ATOM | 440 | N    | LEU | 26 | 1.738  | 12.298 | -4.229  | 1.00 | 0.00 |
| ATOM | 441 | H    | LEU | 26 | 2.161  | 11.622 | -3.609  | 1.00 | 0.00 |
| ATOM | 442 | CA   | LEU | 26 | 1.063  | 13.426 | -3.649  | 1.00 | 0.00 |
| ATOM | 443 | HA   | LEU | 26 | 0.545  | 13.985 | -4.428  | 1.00 | 0.00 |
| ATOM | 444 | CB   | LEU | 26 | 0.032  | 12.964 | -2.608  | 1.00 | 0.00 |
| ATOM | 445 | HB2  | LEU | 26 | 0.547  | 13.064 | -1.653  | 1.00 | 0.00 |
| ATOM | 446 | HB3  | LEU | 26 | -0.818 | 13.645 | -2.636  | 1.00 | 0.00 |

|      |     |      |     |    |        |        |        |      |      |
|------|-----|------|-----|----|--------|--------|--------|------|------|
| ATOM | 447 | CG   | LEU | 26 | -0.464 | 11.520 | -2.772 | 1.00 | 0.00 |
| ATOM | 448 | HG   | LEU | 26 | -0.349 | 11.220 | -3.814 | 1.00 | 0.00 |
| ATOM | 449 | CD1  | LEU | 26 | 0.336  | 10.582 | -1.885 | 1.00 | 0.00 |
| ATOM | 450 | HD11 | LEU | 26 | 0.221  | 10.880 | -0.843 | 1.00 | 0.00 |
| ATOM | 451 | HD12 | LEU | 26 | -0.028 | 9.562  | -2.013 | 1.00 | 0.00 |
| ATOM | 452 | HD13 | LEU | 26 | 1.389  | 10.629 | -2.162 | 1.00 | 0.00 |
| ATOM | 453 | CD2  | LEU | 26 | -1.954 | 11.419 | -2.450 | 1.00 | 0.00 |
| ATOM | 454 | HD21 | LEU | 26 | -2.517 | 12.062 | -3.126 | 1.00 | 0.00 |
| ATOM | 455 | HD22 | LEU | 26 | -2.284 | 10.387 | -2.573 | 1.00 | 0.00 |
| ATOM | 456 | HD23 | LEU | 26 | -2.126 | 11.735 | -1.421 | 1.00 | 0.00 |
| ATOM | 457 | C    | LEU | 26 | 2.096  | 14.396 | -3.102 | 1.00 | 0.00 |
| ATOM | 458 | O    | LEU | 26 | 3.290  | 14.272 | -3.345 | 1.00 | 0.00 |
| ATOM | 459 | N    | ALA | 27 | 1.623  | 15.361 | -2.316 | 1.00 | 0.00 |
| ATOM | 460 | H    | ALA | 27 | 0.625  | 15.460 | -2.193 | 1.00 | 0.00 |
| ATOM | 461 | CA   | ALA | 27 | 2.494  | 16.337 | -1.689 | 1.00 | 0.00 |
| ATOM | 462 | HA   | ALA | 27 | 3.390  | 16.488 | -2.291 | 1.00 | 0.00 |
| ATOM | 463 | CB   | ALA | 27 | 1.747  | 17.661 | -1.587 | 1.00 | 0.00 |
| ATOM | 464 | HB1  | ALA | 27 | 0.852  | 17.528 | -0.980 | 1.00 | 0.00 |
| ATOM | 465 | HB2  | ALA | 27 | 2.392  | 18.408 | -1.124 | 1.00 | 0.00 |
| ATOM | 466 | HB3  | ALA | 27 | 1.462  | 17.996 | -2.585 | 1.00 | 0.00 |
| ATOM | 467 | C    | ALA | 27 | 2.970  | 15.823 | -0.333 | 1.00 | 0.00 |
| ATOM | 468 | O    | ALA | 27 | 3.409  | 16.590 | 0.519  | 1.00 | 0.00 |

|      |     |     |     |    |       |        |        |      |      |
|------|-----|-----|-----|----|-------|--------|--------|------|------|
| ATOM | 469 | N   | GLY | 28 | 2.826 | 14.510 | -0.100 | 1.00 | 0.00 |
| ATOM | 470 | H   | GLY | 28 | 2.399 | 13.933 | -0.811 | 1.00 | 0.00 |
| ATOM | 471 | CA  | GLY | 28 | 3.255 | 13.880 | 1.127  | 1.00 | 0.00 |
| ATOM | 472 | HA2 | GLY | 28 | 3.047 | 14.551 | 1.960  | 1.00 | 0.00 |
| ATOM | 473 | HA3 | GLY | 28 | 2.699 | 12.952 | 1.261  | 1.00 | 0.00 |
| ATOM | 474 | C   | GLY | 28 | 4.743 | 13.567 | 1.103  | 1.00 | 0.00 |
| ATOM | 475 | O   | GLY | 28 | 5.221 | 12.803 | 1.936  | 1.00 | 0.00 |
| ATOM | 476 | N   | SER | 29 | 5.463 | 14.112 | 0.122  | 1.00 | 0.00 |
| ATOM | 477 | H   | SER | 29 | 4.989 | 14.655 | -0.585 | 1.00 | 0.00 |
| ATOM | 478 | CA  | SER | 29 | 6.885 | 13.912 | -0.009 | 1.00 | 0.00 |
| ATOM | 479 | HA  | SER | 29 | 7.337 | 13.776 | 0.973  | 1.00 | 0.00 |
| ATOM | 480 | CB  | SER | 29 | 7.158 | 12.666 | -0.848 | 1.00 | 0.00 |
| ATOM | 481 | HB2 | SER | 29 | 6.908 | 11.799 | -0.236 | 1.00 | 0.00 |
| ATOM | 482 | HB3 | SER | 29 | 6.495 | 12.703 | -1.712 | 1.00 | 0.00 |
| ATOM | 483 | OG  | SER | 29 | 8.498 | 12.562 | -1.287 | 1.00 | 0.00 |
| ATOM | 484 | HG  | SER | 29 | 8.603 | 11.761 | -1.807 | 1.00 | 0.00 |
| ATOM | 485 | C   | SER | 29 | 7.557 | 15.119 | -0.620 | 1.00 | 0.00 |
| ATOM | 486 | O   | SER | 29 | 6.911 | 15.849 | -1.343 | 1.00 | 0.00 |
| ATOM | 487 | N   | PRO | 30 | 8.816 | 15.363 | -0.254 | 1.00 | 0.00 |
| ATOM | 488 | CD  | PRO | 30 | 9.599 | 14.552 | 0.662  | 1.00 | 0.00 |
| ATOM | 489 | HD2 | PRO | 30 | 9.769 | 13.583 | 0.192  | 1.00 | 0.00 |
| ATOM | 490 | HD3 | PRO | 30 | 9.016 | 14.416 | 1.573  | 1.00 | 0.00 |

|      |     |     |     |    |        |        |        |      |      |
|------|-----|-----|-----|----|--------|--------|--------|------|------|
| ATOM | 491 | CG  | PRO | 30 | 10.894 | 15.318 | 0.909  | 1.00 | 0.00 |
| ATOM | 492 | HG2 | PRO | 30 | 11.733 | 14.726 | 0.542  | 1.00 | 0.00 |
| ATOM | 493 | HG3 | PRO | 30 | 11.009 | 15.486 | 1.980  | 1.00 | 0.00 |
| ATOM | 494 | CB  | PRO | 30 | 10.775 | 16.646 | 0.157  | 1.00 | 0.00 |
| ATOM | 495 | HB2 | PRO | 30 | 11.677 | 16.864 | -0.415 | 1.00 | 0.00 |
| ATOM | 496 | HB3 | PRO | 30 | 10.574 | 17.467 | 0.845  | 1.00 | 0.00 |
| ATOM | 497 | CA  | PRO | 30 | 9.593  | 16.459 | -0.789 | 1.00 | 0.00 |
| ATOM | 498 | HA  | PRO | 30 | 8.982  | 17.360 | -0.740 | 1.00 | 0.00 |
| ATOM | 499 | C   | PRO | 30 | 10.021 | 16.219 | -2.216 | 1.00 | 0.00 |
| ATOM | 500 | O   | PRO | 30 | 9.695  | 15.188 | -2.793 | 1.00 | 0.00 |
| ATOM | 501 | N   | PHE | 31 | 10.790 | 17.163 | -2.770 | 1.00 | 0.00 |
| ATOM | 502 | H   | PHE | 31 | 11.061 | 17.970 | -2.227 | 1.00 | 0.00 |
| ATOM | 503 | CA  | PHE | 31 | 11.261 | 17.065 | -4.133 | 1.00 | 0.00 |
| ATOM | 504 | HA  | PHE | 31 | 11.516 | 16.036 | -4.387 | 1.00 | 0.00 |
| ATOM | 505 | CB  | PHE | 31 | 10.131 | 17.531 | -5.056 | 1.00 | 0.00 |
| ATOM | 506 | HB2 | PHE | 31 | 10.063 | 18.617 | -5.114 | 1.00 | 0.00 |
| ATOM | 507 | HB3 | PHE | 31 | 10.357 | 17.129 | -6.044 | 1.00 | 0.00 |
| ATOM | 508 | CG  | PHE | 31 | 8.748  | 17.029 | -4.690 | 1.00 | 0.00 |
| ATOM | 509 | CD1 | PHE | 31 | 8.341  | 15.740 | -5.069 | 1.00 | 0.00 |
| ATOM | 510 | HD1 | PHE | 31 | 9.003  | 15.122 | -5.677 | 1.00 | 0.00 |
| ATOM | 511 | CE1 | PHE | 31 | 7.090  | 15.245 | -4.670 | 1.00 | 0.00 |
| ATOM | 512 | HE1 | PHE | 31 | 6.798  | 14.227 | -4.929 | 1.00 | 0.00 |

|      |     |     |     |    |        |        |        |      |      |
|------|-----|-----|-----|----|--------|--------|--------|------|------|
| ATOM | 513 | CZ  | PHE | 31 | 6.217  | 16.059 | -3.939 | 1.00 | 0.00 |
| ATOM | 514 | HZ  | PHE | 31 | 5.225  | 15.696 | -3.668 | 1.00 | 0.00 |
| ATOM | 515 | CE2 | PHE | 31 | 6.623  | 17.348 | -3.554 | 1.00 | 0.00 |
| ATOM | 516 | HE2 | PHE | 31 | 5.942  | 17.981 | -2.985 | 1.00 | 0.00 |
| ATOM | 517 | CD2 | PHE | 31 | 7.897  | 17.821 | -3.899 | 1.00 | 0.00 |
| ATOM | 518 | HD2 | PHE | 31 | 8.226  | 18.801 | -3.554 | 1.00 | 0.00 |
| ATOM | 519 | C   | PHE | 31 | 12.479 | 17.945 | -4.353 | 1.00 | 0.00 |
| ATOM | 520 | O   | PHE | 31 | 12.613 | 18.989 | -3.711 | 1.00 | 0.00 |
| ATOM | 521 | N   | SER | 32 | 13.359 | 17.518 | -5.256 | 1.00 | 0.00 |
| ATOM | 522 | H   | SER | 32 | 13.219 | 16.628 | -5.714 | 1.00 | 0.00 |
| ATOM | 523 | CA  | SER | 32 | 14.557 | 18.273 | -5.572 | 1.00 | 0.00 |
| ATOM | 524 | HA  | SER | 32 | 14.458 | 19.294 | -5.205 | 1.00 | 0.00 |
| ATOM | 525 | CB  | SER | 32 | 15.786 | 17.630 | -4.911 | 1.00 | 0.00 |
| ATOM | 526 | HB2 | SER | 32 | 15.473 | 16.699 | -4.438 | 1.00 | 0.00 |
| ATOM | 527 | HB3 | SER | 32 | 16.519 | 17.413 | -5.688 | 1.00 | 0.00 |
| ATOM | 528 | OG  | SER | 32 | 16.366 | 18.480 | -3.941 | 1.00 | 0.00 |
| ATOM | 529 | HG  | SER | 32 | 17.128 | 18.046 | -3.551 | 1.00 | 0.00 |
| ATOM | 530 | C   | SER | 32 | 14.738 | 18.353 | -7.080 | 1.00 | 0.00 |
| ATOM | 531 | O   | SER | 32 | 14.379 | 19.350 | -7.706 | 1.00 | 0.00 |
| ATOM | 532 | N   | GLU | 33 | 15.291 | 17.285 | -7.664 | 1.00 | 0.00 |
| ATOM | 533 | H   | GLU | 33 | 15.619 | 16.519 | -7.094 | 1.00 | 0.00 |
| ATOM | 534 | CA  | GLU | 33 | 15.524 | 17.227 | -9.086 | 1.00 | 0.00 |

|      |     |     |     |    |        |        |         |      |      |
|------|-----|-----|-----|----|--------|--------|---------|------|------|
| ATOM | 535 | HA  | GLU | 33 | 15.719 | 18.229 | -9.468  | 1.00 | 0.00 |
| ATOM | 536 | CB  | GLU | 33 | 16.734 | 16.338 | -9.400  | 1.00 | 0.00 |
| ATOM | 537 | HB2 | GLU | 33 | 17.005 | 15.791 | -8.497  | 1.00 | 0.00 |
| ATOM | 538 | HB3 | GLU | 33 | 16.451 | 15.632 | -10.181 | 1.00 | 0.00 |
| ATOM | 539 | CG  | GLU | 33 | 17.926 | 17.165 | -9.870  | 1.00 | 0.00 |
| ATOM | 540 | HG2 | GLU | 33 | 18.045 | 17.025 | -10.945 | 1.00 | 0.00 |
| ATOM | 541 | HG3 | GLU | 33 | 17.732 | 18.216 | -9.660  | 1.00 | 0.00 |
| ATOM | 542 | CD  | GLU | 33 | 19.204 | 16.731 | -9.156  | 1.00 | 0.00 |
| ATOM | 543 | OE1 | GLU | 33 | 19.585 | 15.551 | -9.333  | 1.00 | 0.00 |
| ATOM | 544 | OE2 | GLU | 33 | 19.775 | 17.584 | -8.444  | 1.00 | 0.00 |
| ATOM | 545 | C   | GLU | 33 | 14.268 | 16.756 | -9.809  | 1.00 | 0.00 |
| ATOM | 546 | O   | GLU | 33 | 13.185 | 16.662 | -9.224  | 1.00 | 0.00 |
| ATOM | 547 | N   | ASN | 34 | 14.420 | 16.431 | -11.098 | 1.00 | 0.00 |
| ATOM | 548 | H   | ASN | 34 | 15.318 | 16.556 | -11.542 | 1.00 | 0.00 |
| ATOM | 549 | CA  | ASN | 34 | 13.337 | 15.912 | -11.886 | 1.00 | 0.00 |
| ATOM | 550 | HA  | ASN | 34 | 12.387 | 16.305 | -11.524 | 1.00 | 0.00 |
| ATOM | 551 | CB  | ASN | 34 | 13.513 | 16.327 | -13.345 | 1.00 | 0.00 |
| ATOM | 552 | HB2 | ASN | 34 | 14.580 | 16.353 | -13.568 | 1.00 | 0.00 |
| ATOM | 553 | HB3 | ASN | 34 | 13.022 | 15.610 | -14.003 | 1.00 | 0.00 |
| ATOM | 554 | CG  | ASN | 34 | 12.931 | 17.699 | -13.605 | 1.00 | 0.00 |
| ATOM | 555 | OD1 | ASN | 34 | 11.863 | 18.054 | -13.135 | 1.00 | 0.00 |
| ATOM | 556 | ND2 | ASN | 34 | 13.647 | 18.475 | -14.395 | 1.00 | 0.00 |



|      |     |      |     |    |        |        |         |      |      |
|------|-----|------|-----|----|--------|--------|---------|------|------|
| ATOM | 557 | HD21 | ASN | 34 | 13.321 | 19.405 | -14.614 | 1.00 | 0.00 |
| ATOM | 558 | HD22 | ASN | 34 | 14.518 | 18.135 | -14.778 | 1.00 | 0.00 |
| ATOM | 559 | C    | ASN | 34 | 13.294 | 14.402 | -11.805 | 1.00 | 0.00 |
| ATOM | 560 | O    | ASN | 34 | 14.340 | 13.756 | -11.748 | 1.00 | 0.00 |
| ATOM | 561 | N    | GLN | 35 | 12.094 | 13.838 | -11.897 | 1.00 | 0.00 |
| ATOM | 562 | H    | GLN | 35 | 11.276 | 14.429 | -11.939 | 1.00 | 0.00 |
| ATOM | 563 | CA   | GLN | 35 | 11.904 | 12.410 | -11.879 | 1.00 | 0.00 |
| ATOM | 564 | HA   | GLN | 35 | 12.406 | 11.964 | -12.738 | 1.00 | 0.00 |
| ATOM | 565 | CB   | GLN | 35 | 12.482 | 11.798 | -10.603 | 1.00 | 0.00 |
| ATOM | 566 | HB2  | GLN | 35 | 13.262 | 12.459 | -10.227 | 1.00 | 0.00 |
| ATOM | 567 | HB3  | GLN | 35 | 11.683 | 11.723 | -9.865  | 1.00 | 0.00 |
| ATOM | 568 | CG   | GLN | 35 | 13.069 | 10.414 | -10.859 | 1.00 | 0.00 |
| ATOM | 569 | HG2  | GLN | 35 | 13.304 | 9.931  | -9.910  | 1.00 | 0.00 |
| ATOM | 570 | HG3  | GLN | 35 | 12.331 | 9.818  | -11.396 | 1.00 | 0.00 |
| ATOM | 571 | CD   | GLN | 35 | 14.337 | 10.486 | -11.695 | 1.00 | 0.00 |
| ATOM | 572 | OE1  | GLN | 35 | 15.379 | 10.946 | -11.272 | 1.00 | 0.00 |
| ATOM | 573 | NE2  | GLN | 35 | 14.231 | 9.995  | -12.919 | 1.00 | 0.00 |
| ATOM | 574 | HE21 | GLN | 35 | 15.031 | 10.007 | -13.536 | 1.00 | 0.00 |
| ATOM | 575 | HE22 | GLN | 35 | 13.351 | 9.610  | -13.231 | 1.00 | 0.00 |
| ATOM | 576 | C    | GLN | 35 | 10.437 | 12.090 | -12.012 | 1.00 | 0.00 |
| ATOM | 577 | O    | GLN | 35 | 9.593  | 12.943 | -11.733 | 1.00 | 0.00 |
| ATOM | 578 | N    | TRP | 36 | 10.141 | 10.833 | -12.391 | 1.00 | 0.00 |

|      |     |     |     |    |        |        |         |      |      |
|------|-----|-----|-----|----|--------|--------|---------|------|------|
| ATOM | 579 | H   | TRP | 36 | 10.883 | 10.192 | -12.634 | 1.00 | 0.00 |
| ATOM | 580 | CA  | TRP | 36 | 8.766  | 10.378 | -12.525 | 1.00 | 0.00 |
| ATOM | 581 | HA  | TRP | 36 | 8.310  | 10.836 | -13.403 | 1.00 | 0.00 |
| ATOM | 582 | CB  | TRP | 36 | 8.715  | 8.855  | -12.686 | 1.00 | 0.00 |
| ATOM | 583 | HB2 | TRP | 36 | 8.999  | 8.570  | -13.699 | 1.00 | 0.00 |
| ATOM | 584 | HB3 | TRP | 36 | 9.406  | 8.403  | -11.975 | 1.00 | 0.00 |
| ATOM | 585 | CG  | TRP | 36 | 7.368  | 8.239  | -12.427 | 1.00 | 0.00 |
| ATOM | 586 | CD1 | TRP | 36 | 6.686  | 8.159  | -11.251 | 1.00 | 0.00 |
| ATOM | 587 | HD1 | TRP | 36 | 7.193  | 8.588  | -10.387 | 1.00 | 0.00 |
| ATOM | 588 | NE1 | TRP | 36 | 5.462  | 7.532  | -11.412 | 1.00 | 0.00 |
| ATOM | 589 | HE1 | TRP | 36 | 4.795  | 7.347  | -10.677 | 1.00 | 0.00 |
| ATOM | 590 | CE2 | TRP | 36 | 5.311  | 7.182  | -12.733 | 1.00 | 0.00 |
| ATOM | 591 | CZ2 | TRP | 36 | 4.283  | 6.527  | -13.412 | 1.00 | 0.00 |
| ATOM | 592 | HZ2 | TRP | 36 | 3.403  | 6.224  | -12.845 | 1.00 | 0.00 |
| ATOM | 593 | CH2 | TRP | 36 | 4.447  | 6.299  | -14.787 | 1.00 | 0.00 |
| ATOM | 594 | HH2 | TRP | 36 | 3.668  | 5.791  | -15.356 | 1.00 | 0.00 |
| ATOM | 595 | CZ3 | TRP | 36 | 5.613  | 6.720  | -15.452 | 1.00 | 0.00 |
| ATOM | 596 | HZ3 | TRP | 36 | 5.729  | 6.537  | -16.521 | 1.00 | 0.00 |
| ATOM | 597 | CE3 | TRP | 36 | 6.652  | 7.378  | -14.781 | 1.00 | 0.00 |
| ATOM | 598 | HE3 | TRP | 36 | 7.536  | 7.671  | -15.347 | 1.00 | 0.00 |
| ATOM | 599 | CD2 | TRP | 36 | 6.511  | 7.618  | -13.400 | 1.00 | 0.00 |
| ATOM | 600 | C   | TRP | 36 | 7.963  | 10.840 | -11.301 | 1.00 | 0.00 |

|      |     |     |     |    |        |        |         |      |      |
|------|-----|-----|-----|----|--------|--------|---------|------|------|
| ATOM | 601 | O   | TRP | 36 | 6.768  | 11.089 | -11.393 | 1.00 | 0.00 |
| ATOM | 602 | N   | GLY | 37 | 8.641  | 10.938 | -10.145 | 1.00 | 0.00 |
| ATOM | 603 | H   | GLY | 37 | 9.605  | 10.638 | -10.110 | 1.00 | 0.00 |
| ATOM | 604 | CA  | GLY | 37 | 8.045  | 11.456 | -8.945  | 1.00 | 0.00 |
| ATOM | 605 | HA2 | GLY | 37 | 7.601  | 12.428 | -9.157  | 1.00 | 0.00 |
| ATOM | 606 | HA3 | GLY | 37 | 7.269  | 10.769 | -8.606  | 1.00 | 0.00 |
| ATOM | 607 | C   | GLY | 37 | 9.078  | 11.614 | -7.847  | 1.00 | 0.00 |
| ATOM | 608 | O   | GLY | 37 | 9.620  | 12.699 | -7.651  | 1.00 | 0.00 |
| ATOM | 609 | N   | PRO | 38 | 9.377  | 10.505 | -7.153  | 1.00 | 0.00 |
| ATOM | 610 | CD  | PRO | 38 | 8.791  | 9.184  | -7.347  | 1.00 | 0.00 |
| ATOM | 611 | HD2 | PRO | 38 | 9.133  | 8.804  | -8.310  | 1.00 | 0.00 |
| ATOM | 612 | HD3 | PRO | 38 | 7.707  | 9.298  | -7.366  | 1.00 | 0.00 |
| ATOM | 613 | CG  | PRO | 38 | 9.266  | 8.326  | -6.176  | 1.00 | 0.00 |
| ATOM | 614 | HG2 | PRO | 38 | 9.876  | 7.507  | -6.557  | 1.00 | 0.00 |
| ATOM | 615 | HG3 | PRO | 38 | 8.399  | 7.920  | -5.654  | 1.00 | 0.00 |
| ATOM | 616 | CB  | PRO | 38 | 10.073 | 9.244  | -5.261  | 1.00 | 0.00 |
| ATOM | 617 | HB2 | PRO | 38 | 11.014 | 8.776  | -4.971  | 1.00 | 0.00 |
| ATOM | 618 | HB3 | PRO | 38 | 9.506  | 9.503  | -4.367  | 1.00 | 0.00 |
| ATOM | 619 | CA  | PRO | 38 | 10.349 | 10.493 | -6.081  | 1.00 | 0.00 |
| ATOM | 620 | HA  | PRO | 38 | 10.158 | 11.346 | -5.430  | 1.00 | 0.00 |
| ATOM | 621 | C   | PRO | 38 | 11.757 | 10.575 | -6.616  | 1.00 | 0.00 |
| ATOM | 622 | O   | PRO | 38 | 12.470 | 9.587  | -6.664  | 1.00 | 0.00 |

|      |     |      |     |    |        |        |        |      |      |
|------|-----|------|-----|----|--------|--------|--------|------|------|
| ATOM | 623 | N    | GLN | 39 | 12.182 | 11.764 | -7.033 | 1.00 | 0.00 |
| ATOM | 624 | H    | GLN | 39 | 11.553 | 12.553 | -7.017 | 1.00 | 0.00 |
| ATOM | 625 | CA   | GLN | 39 | 13.509 | 11.957 | -7.570 | 1.00 | 0.00 |
| ATOM | 626 | HA   | GLN | 39 | 13.666 | 11.296 | -8.423 | 1.00 | 0.00 |
| ATOM | 627 | CB   | GLN | 39 | 13.683 | 13.408 | -8.036 | 1.00 | 0.00 |
| ATOM | 628 | HB2  | GLN | 39 | 12.862 | 13.673 | -8.703 | 1.00 | 0.00 |
| ATOM | 629 | HB3  | GLN | 39 | 13.675 | 14.068 | -7.169 | 1.00 | 0.00 |
| ATOM | 630 | CG   | GLN | 39 | 15.014 | 13.559 | -8.780 | 1.00 | 0.00 |
| ATOM | 631 | HG2  | GLN | 39 | 15.145 | 12.729 | -9.475 | 1.00 | 0.00 |
| ATOM | 632 | HG3  | GLN | 39 | 14.976 | 14.496 | -9.336 | 1.00 | 0.00 |
| ATOM | 633 | CD   | GLN | 39 | 16.205 | 13.599 | -7.843 | 1.00 | 0.00 |
| ATOM | 634 | OE1  | GLN | 39 | 16.095 | 13.982 | -6.681 | 1.00 | 0.00 |
| ATOM | 635 | NE2  | GLN | 39 | 17.343 | 13.173 | -8.346 | 1.00 | 0.00 |
| ATOM | 636 | HE21 | GLN | 39 | 18.176 | 13.173 | -7.775 | 1.00 | 0.00 |
| ATOM | 637 | HE22 | GLN | 39 | 17.379 | 12.847 | -9.302 | 1.00 | 0.00 |
| ATOM | 638 | C    | GLN | 39 | 14.557 | 11.591 | -6.532 | 1.00 | 0.00 |
| ATOM | 639 | O    | GLN | 39 | 15.619 | 11.074 | -6.873 | 1.00 | 0.00 |
| ATOM | 640 | N    | GLN | 40 | 14.236 | 11.839 | -5.258 | 1.00 | 0.00 |
| ATOM | 641 | H    | GLN | 40 | 13.368 | 12.305 | -5.036 | 1.00 | 0.00 |
| ATOM | 642 | CA   | GLN | 40 | 15.133 | 11.516 | -4.179 | 1.00 | 0.00 |
| ATOM | 643 | HA   | GLN | 40 | 16.168 | 11.613 | -4.508 | 1.00 | 0.00 |
| ATOM | 644 | CB   | GLN | 40 | 14.899 | 12.474 | -3.012 | 1.00 | 0.00 |

|      |     |      |     |    |        |        |        |      |      |
|------|-----|------|-----|----|--------|--------|--------|------|------|
| ATOM | 645 | HB2  | GLN | 40 | 14.679 | 13.467 | -3.404 | 1.00 | 0.00 |
| ATOM | 646 | HB3  | GLN | 40 | 14.052 | 12.120 | -2.425 | 1.00 | 0.00 |
| ATOM | 647 | CG   | GLN | 40 | 16.146 | 12.541 | -2.121 | 1.00 | 0.00 |
| ATOM | 648 | HG2  | GLN | 40 | 16.973 | 12.123 | -2.696 | 1.00 | 0.00 |
| ATOM | 649 | HG3  | GLN | 40 | 16.377 | 13.571 | -1.849 | 1.00 | 0.00 |
| ATOM | 650 | CD   | GLN | 40 | 15.980 | 11.725 | -0.843 | 1.00 | 0.00 |
| ATOM | 651 | OE1  | GLN | 40 | 14.904 | 11.279 | -0.464 | 1.00 | 0.00 |
| ATOM | 652 | NE2  | GLN | 40 | 17.078 | 11.564 | -0.125 | 1.00 | 0.00 |
| ATOM | 653 | HE21 | GLN | 40 | 17.043 | 11.034 | 0.734  | 1.00 | 0.00 |
| ATOM | 654 | HE22 | GLN | 40 | 17.947 | 11.971 | -0.439 | 1.00 | 0.00 |
| ATOM | 655 | C    | GLN | 40 | 14.960 | 10.064 | -3.740 | 1.00 | 0.00 |
| ATOM | 656 | O    | GLN | 40 | 15.683 | 9.571  | -2.884 | 1.00 | 0.00 |
| ATOM | 657 | N    | GLY | 41 | 13.979 | 9.371  | -4.319 | 1.00 | 0.00 |
| ATOM | 658 | H    | GLY | 41 | 13.388 | 9.844  | -4.987 | 1.00 | 0.00 |
| ATOM | 659 | CA   | GLY | 41 | 13.718 | 7.979  | -4.040 | 1.00 | 0.00 |
| ATOM | 660 | HA2  | GLY | 41 | 14.650 | 7.493  | -3.752 | 1.00 | 0.00 |
| ATOM | 661 | HA3  | GLY | 41 | 13.003 | 7.908  | -3.221 | 1.00 | 0.00 |
| ATOM | 662 | C    | GLY | 41 | 13.149 | 7.273  | -5.253 | 1.00 | 0.00 |
| ATOM | 663 | O    | GLY | 41 | 12.025 | 6.814  | -5.248 | 1.00 | 0.00 |
| ATOM | 664 | N    | PRO | 42 | 13.902 | 7.203  | -6.350 | 1.00 | 0.00 |
| ATOM | 665 | CD   | PRO | 42 | 15.243 | 7.732  | -6.488 | 1.00 | 0.00 |
| ATOM | 666 | HD2  | PRO | 42 | 15.901 | 7.155  | -5.838 | 1.00 | 0.00 |

|      |     |         |    |        |       |        |      |      |
|------|-----|---------|----|--------|-------|--------|------|------|
| ATOM | 667 | HD3 PRO | 42 | 15.230 | 8.771 | -6.161 | 1.00 | 0.00 |
| ATOM | 668 | CG PRO  | 42 | 15.606 | 7.591 | -7.963 | 1.00 | 0.00 |
| ATOM | 669 | HG2 PRO | 42 | 16.456 | 6.914 | -8.057 | 1.00 | 0.00 |
| ATOM | 670 | HG3 PRO | 42 | 15.877 | 8.570 | -8.357 | 1.00 | 0.00 |
| ATOM | 671 | CB PRO  | 42 | 14.369 | 7.037 | -8.677 | 1.00 | 0.00 |
| ATOM | 672 | HB2 PRO | 42 | 14.638 | 6.207 | -9.330 | 1.00 | 0.00 |
| ATOM | 673 | HB3 PRO | 42 | 13.864 | 7.808 | -9.259 | 1.00 | 0.00 |
| ATOM | 674 | CA PRO  | 42 | 13.452 | 6.543 | -7.562 | 1.00 | 0.00 |
| ATOM | 675 | HA PRO  | 42 | 12.439 | 6.881 | -7.780 | 1.00 | 0.00 |
| ATOM | 676 | C PRO   | 42 | 13.461 | 5.037 | -7.421 | 1.00 | 0.00 |
| ATOM | 677 | O PRO   | 42 | 12.622 | 4.346 | -8.012 | 1.00 | 0.00 |
| ATOM | 678 | N SER   | 43 | 14.396 | 4.539 | -6.619 | 1.00 | 0.00 |
| ATOM | 679 | H SER   | 43 | 15.058 | 5.170 | -6.192 | 1.00 | 0.00 |
| ATOM | 680 | CA SER  | 43 | 14.544 | 3.124 | -6.375 | 1.00 | 0.00 |
| ATOM | 681 | HA SER  | 43 | 14.441 | 2.581 | -7.315 | 1.00 | 0.00 |
| ATOM | 682 | CB SER  | 43 | 15.916 | 2.805 | -5.774 | 1.00 | 0.00 |
| ATOM | 683 | HB2 SER | 43 | 15.814 | 2.752 | -4.690 | 1.00 | 0.00 |
| ATOM | 684 | HB3 SER | 43 | 16.243 | 1.837 | -6.155 | 1.00 | 0.00 |
| ATOM | 685 | OG SER  | 43 | 16.877 | 3.796 | -6.112 | 1.00 | 0.00 |
| ATOM | 686 | HG SER  | 43 | 17.723 | 3.567 | -5.721 | 1.00 | 0.00 |
| ATOM | 687 | C SER   | 43 | 13.428 | 2.644 | -5.454 | 1.00 | 0.00 |
| ATOM | 688 | O SER   | 43 | 13.637 | 2.333 | -4.288 | 1.00 | 0.00 |

|      |     |      |     |    |        |       |        |      |      |
|------|-----|------|-----|----|--------|-------|--------|------|------|
| ATOM | 689 | N    | LEU | 44 | 12.201 | 2.599 | -5.971 | 1.00 | 0.00 |
| ATOM | 690 | H    | LEU | 44 | 12.058 | 2.907 | -6.922 | 1.00 | 0.00 |
| ATOM | 691 | CA   | LEU | 44 | 11.056 | 2.176 | -5.213 | 1.00 | 0.00 |
| ATOM | 692 | HA   | LEU | 44 | 11.380 | 1.712 | -4.281 | 1.00 | 0.00 |
| ATOM | 693 | CB   | LEU | 44 | 10.166 | 3.373 | -4.880 | 1.00 | 0.00 |
| ATOM | 694 | HB2  | LEU | 44 | 10.384 | 4.119 | -5.644 | 1.00 | 0.00 |
| ATOM | 695 | HB3  | LEU | 44 | 9.122  | 3.069 | -4.957 | 1.00 | 0.00 |
| ATOM | 696 | CG   | LEU | 44 | 10.424 | 3.975 | -3.488 | 1.00 | 0.00 |
| ATOM | 697 | HG   | LEU | 44 | 11.415 | 3.670 | -3.153 | 1.00 | 0.00 |
| ATOM | 698 | CD1  | LEU | 44 | 10.348 | 5.483 | -3.528 | 1.00 | 0.00 |
| ATOM | 699 | HD11 | LEU | 44 | 9.357  | 5.788 | -3.863 | 1.00 | 0.00 |
| ATOM | 700 | HD12 | LEU | 44 | 10.534 | 5.883 | -2.532 | 1.00 | 0.00 |
| ATOM | 701 | HD13 | LEU | 44 | 11.098 | 5.867 | -4.219 | 1.00 | 0.00 |
| ATOM | 702 | CD2  | LEU | 44 | 9.437  | 3.447 | -2.469 | 1.00 | 0.00 |
| ATOM | 703 | HD21 | LEU | 44 | 9.530  | 2.363 | -2.400 | 1.00 | 0.00 |
| ATOM | 704 | HD22 | LEU | 44 | 9.646  | 3.891 | -1.496 | 1.00 | 0.00 |
| ATOM | 705 | HD23 | LEU | 44 | 8.424  | 3.705 | -2.776 | 1.00 | 0.00 |
| ATOM | 706 | C    | LEU | 44 | 10.328 | 1.149 | -6.019 | 1.00 | 0.00 |
| ATOM | 707 | O    | LEU | 44 | 9.914  | 0.181 | -5.453 | 1.00 | 0.00 |
| ATOM | 708 | N    | ARG | 45 | 10.164 | 1.321 | -7.326 | 1.00 | 0.00 |
| ATOM | 709 | H    | ARG | 45 | 10.533 | 2.162 | -7.745 | 1.00 | 0.00 |
| ATOM | 710 | CA   | ARG | 45 | 9.490  | 0.370 | -8.179 | 1.00 | 0.00 |

|      |     |      |     |    |        |        |         |      |      |
|------|-----|------|-----|----|--------|--------|---------|------|------|
| ATOM | 711 | HA   | ARG | 45 | 8.477  | 0.201  | -7.813  | 1.00 | 0.00 |
| ATOM | 712 | CB   | ARG | 45 | 9.410  | 0.891  | -9.610  | 1.00 | 0.00 |
| ATOM | 713 | HB2  | ARG | 45 | 10.412 | 1.172  | -9.935  | 1.00 | 0.00 |
| ATOM | 714 | HB3  | ARG | 45 | 9.032  | 0.093  | -10.250 | 1.00 | 0.00 |
| ATOM | 715 | CG   | ARG | 45 | 8.487  | 2.100  | -9.706  | 1.00 | 0.00 |
| ATOM | 716 | HG2  | ARG | 45 | 8.996  | 2.958  | -9.267  | 1.00 | 0.00 |
| ATOM | 717 | HG3  | ARG | 45 | 8.286  | 2.297  | -10.759 | 1.00 | 0.00 |
| ATOM | 718 | CD   | ARG | 45 | 7.159  | 1.859  | -8.967  | 1.00 | 0.00 |
| ATOM | 719 | HD2  | ARG | 45 | 6.927  | 0.794  | -8.968  | 1.00 | 0.00 |
| ATOM | 720 | HD3  | ARG | 45 | 7.242  | 2.211  | -7.939  | 1.00 | 0.00 |
| ATOM | 721 | NE   | ARG | 45 | 6.060  | 2.581  | -9.625  | 1.00 | 0.00 |
| ATOM | 722 | HE   | ARG | 45 | 5.321  | 2.018  | -10.022 | 1.00 | 0.00 |
| ATOM | 723 | CZ   | ARG | 45 | 5.958  | 3.895  | -9.697  | 1.00 | 0.00 |
| ATOM | 724 | NH1  | ARG | 45 | 6.863  | 4.669  | -9.135  | 1.00 | 0.00 |
| ATOM | 725 | HH11 | ARG | 45 | 7.643  | 4.255  | -8.644  | 1.00 | 0.00 |
| ATOM | 726 | HH12 | ARG | 45 | 6.773  | 5.673  | -9.198  | 1.00 | 0.00 |
| ATOM | 727 | NH2  | ARG | 45 | 4.970  | 4.442  | -10.366 | 1.00 | 0.00 |
| ATOM | 728 | HH21 | ARG | 45 | 4.289  | 3.854  | -10.825 | 1.00 | 0.00 |
| ATOM | 729 | HH22 | ARG | 45 | 4.896  | 5.448  | -10.419 | 1.00 | 0.00 |
| ATOM | 730 | C    | ARG | 45 | 10.223 | -0.929 | -8.198  | 1.00 | 0.00 |
| ATOM | 731 | O    | ARG | 45 | 9.746  | -1.879 | -7.651  | 1.00 | 0.00 |
| ATOM | 732 | N    | GLU | 46 | 11.424 | -0.966 | -8.738  | 1.00 | 0.00 |



|      |     |     |     |    |        |        |         |      |      |
|------|-----|-----|-----|----|--------|--------|---------|------|------|
| ATOM | 733 | H   | GLU | 46 | 11.802 | -0.126 | -9.151  | 1.00 | 0.00 |
| ATOM | 734 | CA  | GLU | 46 | 12.219 | -2.182 | -8.799  | 1.00 | 0.00 |
| ATOM | 735 | HA  | GLU | 46 | 11.705 | -2.932 | -9.400  | 1.00 | 0.00 |
| ATOM | 736 | CB  | GLU | 46 | 13.583 | -1.893 | -9.437  | 1.00 | 0.00 |
| ATOM | 737 | HB2 | GLU | 46 | 14.049 | -1.061 | -8.910  | 1.00 | 0.00 |
| ATOM | 738 | HB3 | GLU | 46 | 14.211 | -2.779 | -9.342  | 1.00 | 0.00 |
| ATOM | 739 | CG  | GLU | 46 | 13.425 | -1.535 | -10.920 | 1.00 | 0.00 |
| ATOM | 740 | HG2 | GLU | 46 | 13.187 | -2.452 | -11.460 | 1.00 | 0.00 |
| ATOM | 741 | HG3 | GLU | 46 | 12.611 | -0.821 | -11.043 | 1.00 | 0.00 |
| ATOM | 742 | CD  | GLU | 46 | 14.716 | -0.937 | -11.476 | 1.00 | 0.00 |
| ATOM | 743 | OE1 | GLU | 46 | 15.218 | 0.023  | -10.846 | 1.00 | 0.00 |
| ATOM | 744 | OE2 | GLU | 46 | 15.168 | -1.428 | -12.530 | 1.00 | 0.00 |
| ATOM | 745 | C   | GLU | 46 | 12.412 | -2.769 | -7.401  | 1.00 | 0.00 |
| ATOM | 746 | O   | GLU | 46 | 12.691 | -3.956 | -7.260  | 1.00 | 0.00 |
| ATOM | 747 | N   | GLN | 47 | 12.227 | -1.933 | -6.367  | 1.00 | 0.00 |
| ATOM | 748 | H   | GLN | 47 | 12.048 | -0.957 | -6.552  | 1.00 | 0.00 |
| ATOM | 749 | CA  | GLN | 47 | 12.326 | -2.357 | -5.007  | 1.00 | 0.00 |
| ATOM | 750 | HA  | GLN | 47 | 13.092 | -3.127 | -4.913  | 1.00 | 0.00 |
| ATOM | 751 | CB  | GLN | 47 | 12.704 | -1.183 | -4.114  | 1.00 | 0.00 |
| ATOM | 752 | HB2 | GLN | 47 | 12.657 | -0.263 | -4.696  | 1.00 | 0.00 |
| ATOM | 753 | HB3 | GLN | 47 | 11.999 | -1.125 | -3.285  | 1.00 | 0.00 |
| ATOM | 754 | CG  | GLN | 47 | 14.124 | -1.368 | -3.565  | 1.00 | 0.00 |

|      |     |      |     |    |        |        |        |      |      |
|------|-----|------|-----|----|--------|--------|--------|------|------|
| ATOM | 755 | HG2  | GLN | 47 | 14.202 | -2.350 | -3.097 | 1.00 | 0.00 |
| ATOM | 756 | HG3  | GLN | 47 | 14.854 | -1.292 | -4.371 | 1.00 | 0.00 |
| ATOM | 757 | CD   | GLN | 47 | 14.439 | -0.306 | -2.522 | 1.00 | 0.00 |
| ATOM | 758 | OE1  | GLN | 47 | 15.398 | 0.443  | -2.623 | 1.00 | 0.00 |
| ATOM | 759 | NE2  | GLN | 47 | 13.613 | -0.255 | -1.488 | 1.00 | 0.00 |
| ATOM | 760 | HE21 | GLN | 47 | 13.764 | 0.426  | -0.758 | 1.00 | 0.00 |
| ATOM | 761 | HE22 | GLN | 47 | 12.836 | -0.898 | -1.434 | 1.00 | 0.00 |
| ATOM | 762 | C    | GLN | 47 | 11.038 | -2.970 | -4.551 | 1.00 | 0.00 |
| ATOM | 763 | O    | GLN | 47 | 11.088 | -4.068 | -4.085 | 1.00 | 0.00 |
| ATOM | 764 | N    | CYX | 48 | 9.903  | -2.314 | -4.688 | 1.00 | 0.00 |
| ATOM | 765 | H    | CYX | 48 | 9.992  | -1.386 | -5.076 | 1.00 | 0.00 |
| ATOM | 766 | CA   | CYX | 48 | 8.603  | -2.768 | -4.311 | 1.00 | 0.00 |
| ATOM | 767 | HA   | CYX | 48 | 8.643  | -3.129 | -3.283 | 1.00 | 0.00 |
| ATOM | 768 | CB   | CYX | 48 | 7.551  | -1.673 | -4.401 | 1.00 | 0.00 |
| ATOM | 769 | HB2  | CYX | 48 | 7.248  | -1.377 | -3.397 | 1.00 | 0.00 |
| ATOM | 770 | HB3  | CYX | 48 | 7.966  | -0.812 | -4.924 | 1.00 | 0.00 |
| ATOM | 771 | SG   | CYX | 48 | 6.016  | -2.103 | -5.258 | 1.00 | 0.00 |
| ATOM | 772 | C    | CYX | 48 | 8.227  | -3.913 | -5.193 | 1.00 | 0.00 |
| ATOM | 773 | O    | CYX | 48 | 7.769  | -4.918 | -4.725 | 1.00 | 0.00 |
| ATOM | 774 | N    | CYX | 49 | 8.456  | -3.826 | -6.495 | 1.00 | 0.00 |
| ATOM | 775 | H    | CYX | 49 | 8.816  | -2.944 | -6.829 | 1.00 | 0.00 |
| ATOM | 776 | CA   | CYX | 49 | 8.186  | -4.861 | -7.458 | 1.00 | 0.00 |

|      |     |      |     |    |        |        |        |      |      |
|------|-----|------|-----|----|--------|--------|--------|------|------|
| ATOM | 777 | HA   | CYX | 49 | 7.108  | -5.000 | -7.536 | 1.00 | 0.00 |
| ATOM | 778 | CB   | CYX | 49 | 8.738  | -4.517 | -8.848 | 1.00 | 0.00 |
| ATOM | 779 | HB2  | CYX | 49 | 9.819  | -4.390 | -8.789 | 1.00 | 0.00 |
| ATOM | 780 | HB3  | CYX | 49 | 8.506  | -5.325 | -9.542 | 1.00 | 0.00 |
| ATOM | 781 | SG   | CYX | 49 | 8.117  | -2.986 | -9.601 | 1.00 | 0.00 |
| ATOM | 782 | C    | CYX | 49 | 8.792  | -6.161 | -6.939 | 1.00 | 0.00 |
| ATOM | 783 | O    | CYX | 49 | 8.342  | -7.235 | -7.309 | 1.00 | 0.00 |
| ATOM | 784 | N    | ASN | 50 | 9.824  | -6.065 | -6.088 | 1.00 | 0.00 |
| ATOM | 785 | H    | ASN | 50 | 10.196 | -5.149 | -5.883 | 1.00 | 0.00 |
| ATOM | 786 | CA   | ASN | 50 | 10.412 | -7.194 | -5.443 | 1.00 | 0.00 |
| ATOM | 787 | HA   | ASN | 50 | 10.147 | -8.113 | -5.966 | 1.00 | 0.00 |
| ATOM | 788 | CB   | ASN | 50 | 11.928 | -7.045 | -5.459 | 1.00 | 0.00 |
| ATOM | 789 | HB2  | ASN | 50 | 12.210 | -6.028 | -5.732 | 1.00 | 0.00 |
| ATOM | 790 | HB3  | ASN | 50 | 12.312 | -7.274 | -4.465 | 1.00 | 0.00 |
| ATOM | 791 | CG   | ASN | 50 | 12.552 | -8.001 | -6.449 | 1.00 | 0.00 |
| ATOM | 792 | OD1  | ASN | 50 | 13.120 | -9.025 | -6.101 | 1.00 | 0.00 |
| ATOM | 793 | ND2  | ASN | 50 | 12.420 | -7.665 | -7.719 | 1.00 | 0.00 |
| ATOM | 794 | HD21 | ASN | 50 | 12.812 | -8.257 | -8.438 | 1.00 | 0.00 |
| ATOM | 795 | HD22 | ASN | 50 | 11.928 | -6.819 | -7.966 | 1.00 | 0.00 |
| ATOM | 796 | C    | ASN | 50 | 9.971  | -7.296 | -4.014 | 1.00 | 0.00 |
| ATOM | 797 | O    | ASN | 50 | 9.733  | -8.375 | -3.562 | 1.00 | 0.00 |
| ATOM | 798 | N    | GLU | 51 | 9.858  | -6.207 | -3.285 | 1.00 | 0.00 |

|      |     |     |     |    |        |        |        |      |      |
|------|-----|-----|-----|----|--------|--------|--------|------|------|
| ATOM | 799 | H   | GLU | 51 | 10.154 | -5.351 | -3.730 | 1.00 | 0.00 |
| ATOM | 800 | CA  | GLU | 51 | 9.442  | -6.152 | -1.912 | 1.00 | 0.00 |
| ATOM | 801 | HA  | GLU | 51 | 10.024 | -6.869 | -1.333 | 1.00 | 0.00 |
| ATOM | 802 | CB  | GLU | 51 | 9.646  | -4.756 | -1.312 | 1.00 | 0.00 |
| ATOM | 803 | HB2 | GLU | 51 | 10.219 | -4.856 | -0.390 | 1.00 | 0.00 |
| ATOM | 804 | HB3 | GLU | 51 | 10.207 | -4.152 | -2.025 | 1.00 | 0.00 |
| ATOM | 805 | CG  | GLU | 51 | 8.311  | -4.079 | -1.010 | 1.00 | 0.00 |
| ATOM | 806 | HG2 | GLU | 51 | 7.768  | -4.091 | -1.956 | 1.00 | 0.00 |
| ATOM | 807 | HG3 | GLU | 51 | 7.730  | -4.604 | -0.252 | 1.00 | 0.00 |
| ATOM | 808 | CD  | GLU | 51 | 8.528  | -2.675 | -0.582 | 1.00 | 0.00 |
| ATOM | 809 | OE1 | GLU | 51 | 8.793  | -2.375 | 0.599  | 1.00 | 0.00 |
| ATOM | 810 | OE2 | GLU | 51 | 8.334  | -1.835 | -1.453 | 1.00 | 0.00 |
| ATOM | 811 | C   | GLU | 51 | 7.989  | -6.610 | -1.793 | 1.00 | 0.00 |
| ATOM | 812 | O   | GLU | 51 | 7.492  | -6.837 | -0.700 | 1.00 | 0.00 |
| ATOM | 813 | N   | LEU | 52 | 7.295  | -6.735 | -2.918 | 1.00 | 0.00 |
| ATOM | 814 | H   | LEU | 52 | 7.730  | -6.421 | -3.774 | 1.00 | 0.00 |
| ATOM | 815 | CA  | LEU | 52 | 5.927  | -7.147 | -2.964 | 1.00 | 0.00 |
| ATOM | 816 | HA  | LEU | 52 | 5.503  | -7.155 | -1.960 | 1.00 | 0.00 |
| ATOM | 817 | CB  | LEU | 52 | 5.119  | -6.169 | -3.830 | 1.00 | 0.00 |
| ATOM | 818 | HB2 | LEU | 52 | 4.239  | -5.999 | -3.210 | 1.00 | 0.00 |
| ATOM | 819 | HB3 | LEU | 52 | 5.665  | -5.233 | -3.949 | 1.00 | 0.00 |
| ATOM | 820 | CG  | LEU | 52 | 4.683  | -6.684 | -5.206 | 1.00 | 0.00 |

|      |     |      |     |    |       |         |        |      |      |
|------|-----|------|-----|----|-------|---------|--------|------|------|
| ATOM | 821 | HG   | LEU | 52 | 4.316 | -5.835  | -5.783 | 1.00 | 0.00 |
| ATOM | 822 | CD1  | LEU | 52 | 5.812 | -7.351  | -5.955 | 1.00 | 0.00 |
| ATOM | 823 | HD11 | LEU | 52 | 6.179 | -8.201  | -5.379 | 1.00 | 0.00 |
| ATOM | 824 | HD12 | LEU | 52 | 5.451 | -7.698  | -6.923 | 1.00 | 0.00 |
| ATOM | 825 | HD13 | LEU | 52 | 6.622 | -6.637  | -6.104 | 1.00 | 0.00 |
| ATOM | 826 | CD2  | LEU | 52 | 3.483 | -7.597  | -5.082 | 1.00 | 0.00 |
| ATOM | 827 | HD21 | LEU | 52 | 2.654 | -7.050  | -4.633 | 1.00 | 0.00 |
| ATOM | 828 | HD22 | LEU | 52 | 3.191 | -7.951  | -6.071 | 1.00 | 0.00 |
| ATOM | 829 | HD23 | LEU | 52 | 3.738 | -8.450  | -4.453 | 1.00 | 0.00 |
| ATOM | 830 | C    | LEU | 52 | 5.876 | -8.603  | -3.396 | 1.00 | 0.00 |
| ATOM | 831 | O    | LEU | 52 | 4.882 | -9.263  | -3.150 | 1.00 | 0.00 |
| ATOM | 832 | N    | TYR | 53 | 6.935 | -9.084  | -4.058 | 1.00 | 0.00 |
| ATOM | 833 | H    | TYR | 53 | 7.752 | -8.497  | -4.139 | 1.00 | 0.00 |
| ATOM | 834 | CA   | TYR | 53 | 6.985 | -10.397 | -4.623 | 1.00 | 0.00 |
| ATOM | 835 | HA   | TYR | 53 | 5.980 | -10.790 | -4.776 | 1.00 | 0.00 |
| ATOM | 836 | CB   | TYR | 53 | 7.690 | -10.318 | -5.977 | 1.00 | 0.00 |
| ATOM | 837 | HB2  | TYR | 53 | 7.215 | -9.512  | -6.536 | 1.00 | 0.00 |
| ATOM | 838 | HB3  | TYR | 53 | 8.731 | -10.061 | -5.783 | 1.00 | 0.00 |
| ATOM | 839 | CG   | TYR | 53 | 7.628 | -11.597 | -6.787 | 1.00 | 0.00 |
| ATOM | 840 | CD1  | TYR | 53 | 6.389 | -12.140 | -7.158 | 1.00 | 0.00 |
| ATOM | 841 | HD1  | TYR | 53 | 5.476 | -11.629 | -6.853 | 1.00 | 0.00 |
| ATOM | 842 | CE1  | TYR | 53 | 6.313 | -13.322 | -7.909 | 1.00 | 0.00 |

|      |     |     |     |    |        |         |        |      |      |
|------|-----|-----|-----|----|--------|---------|--------|------|------|
| ATOM | 843 | HE1 | TYR | 53 | 5.349  | -13.732 | -8.211 | 1.00 | 0.00 |
| ATOM | 844 | CZ  | TYR | 53 | 7.503  | -13.973 | -8.284 | 1.00 | 0.00 |
| ATOM | 845 | OH  | TYR | 53 | 7.446  | -15.129 | -8.994 | 1.00 | 0.00 |
| ATOM | 846 | HH  | TYR | 53 | 6.547  | -15.409 | -9.184 | 1.00 | 0.00 |
| ATOM | 847 | CE2 | TYR | 53 | 8.755  | -13.440 | -7.916 | 1.00 | 0.00 |
| ATOM | 848 | HE2 | TYR | 53 | 9.676  | -13.946 | -8.207 | 1.00 | 0.00 |
| ATOM | 849 | CD2 | TYR | 53 | 8.812  | -12.248 | -7.168 | 1.00 | 0.00 |
| ATOM | 850 | HD2 | TYR | 53 | 9.777  | -11.829 | -6.884 | 1.00 | 0.00 |
| ATOM | 851 | C   | TYR | 53 | 7.783  | -11.277 | -3.714 | 1.00 | 0.00 |
| ATOM | 852 | O   | TYR | 53 | 7.570  | -12.469 | -3.676 | 1.00 | 0.00 |
| ATOM | 853 | N   | GLN | 54 | 8.739  | -10.714 | -2.987 | 1.00 | 0.00 |
| ATOM | 854 | H   | GLN | 54 | 8.889  | -9.724  | -3.121 | 1.00 | 0.00 |
| ATOM | 855 | CA  | GLN | 54 | 9.593  | -11.414 | -2.069 | 1.00 | 0.00 |
| ATOM | 856 | HA  | GLN | 54 | 10.219 | -12.116 | -2.620 | 1.00 | 0.00 |
| ATOM | 857 | CB  | GLN | 54 | 10.501 | -10.444 | -1.303 | 1.00 | 0.00 |
| ATOM | 858 | HB2 | GLN | 54 | 11.058 | -11.012 | -0.558 | 1.00 | 0.00 |
| ATOM | 859 | HB3 | GLN | 54 | 11.197 | -9.994  | -2.011 | 1.00 | 0.00 |
| ATOM | 860 | CG  | GLN | 54 | 9.696  | -9.344  | -0.609 | 1.00 | 0.00 |
| ATOM | 861 | HG2 | GLN | 54 | 9.216  | -8.695  | -1.342 | 1.00 | 0.00 |
| ATOM | 862 | HG3 | GLN | 54 | 8.933  | -9.832  | -0.002 | 1.00 | 0.00 |
| ATOM | 863 | CD  | GLN | 54 | 10.563 | -8.495  | 0.295  | 1.00 | 0.00 |
| ATOM | 864 | OE1 | GLN | 54 | 11.729 | -8.226  | 0.021  | 1.00 | 0.00 |

|      |     |      |     |    |        |         |        |      |      |
|------|-----|------|-----|----|--------|---------|--------|------|------|
| ATOM | 865 | NE2  | GLN | 54 | 9.978  | -8.025  | 1.374  | 1.00 | 0.00 |
| ATOM | 866 | HE21 | GLN | 54 | 10.502 | -7.451  | 2.019  | 1.00 | 0.00 |
| ATOM | 867 | HE22 | GLN | 54 | 9.007  | -8.240  | 1.553  | 1.00 | 0.00 |
| ATOM | 868 | C    | GLN | 54 | 8.743  | -12.219 | -1.098 | 1.00 | 0.00 |
| ATOM | 869 | O    | GLN | 54 | 9.190  | -13.245 | -0.601 | 1.00 | 0.00 |
| ATOM | 870 | N    | GLU | 55 | 7.508  | -11.761 | -0.863 | 1.00 | 0.00 |
| ATOM | 871 | H    | GLU | 55 | 7.237  | -10.865 | -1.243 | 1.00 | 0.00 |
| ATOM | 872 | CA   | GLU | 55 | 6.580  | -12.447 | -0.010 | 1.00 | 0.00 |
| ATOM | 873 | HA   | GLU | 55 | 7.118  | -12.963 | 0.785  | 1.00 | 0.00 |
| ATOM | 874 | CB   | GLU | 55 | 5.616  | -11.459 | 0.619  | 1.00 | 0.00 |
| ATOM | 875 | HB2  | GLU | 55 | 4.918  | -11.124 | -0.149 | 1.00 | 0.00 |
| ATOM | 876 | HB3  | GLU | 55 | 5.067  | -11.971 | 1.409  | 1.00 | 0.00 |
| ATOM | 877 | CG   | GLU | 55 | 6.343  | -10.257 | 1.203  | 1.00 | 0.00 |
| ATOM | 878 | HG2  | GLU | 55 | 7.274  | -10.652 | 1.608  | 1.00 | 0.00 |
| ATOM | 879 | HG3  | GLU | 55 | 6.567  | -9.508  | 0.444  | 1.00 | 0.00 |
| ATOM | 880 | CD   | GLU | 55 | 5.539  | -9.624  | 2.314  | 1.00 | 0.00 |
| ATOM | 881 | OE1  | GLU | 55 | 4.599  | -10.247 | 2.841  | 1.00 | 0.00 |
| ATOM | 882 | OE2  | GLU | 55 | 5.853  | -8.459  | 2.560  | 1.00 | 0.00 |
| ATOM | 883 | C    | GLU | 55 | 5.853  | -13.542 | -0.759 | 1.00 | 0.00 |
| ATOM | 884 | O    | GLU | 55 | 4.817  | -14.002 | -0.321 | 1.00 | 0.00 |
| ATOM | 885 | N    | ASP | 56 | 6.386  | -13.990 | -1.885 | 1.00 | 0.00 |
| ATOM | 886 | H    | ASP | 56 | 7.275  | -13.593 | -2.153 | 1.00 | 0.00 |

|      |     |     |     |    |        |         |        |      |      |
|------|-----|-----|-----|----|--------|---------|--------|------|------|
| ATOM | 887 | CA  | ASP | 56 | 5.799  | -14.980 | -2.740 | 1.00 | 0.00 |
| ATOM | 888 | HA  | ASP | 56 | 6.550  | -15.399 | -3.410 | 1.00 | 0.00 |
| ATOM | 889 | CB  | ASP | 56 | 5.224  | -16.112 | -1.881 | 1.00 | 0.00 |
| ATOM | 890 | HB2 | ASP | 56 | 5.914  | -16.144 | -1.038 | 1.00 | 0.00 |
| ATOM | 891 | HB3 | ASP | 56 | 4.226  | -15.857 | -1.525 | 1.00 | 0.00 |
| ATOM | 892 | CG  | ASP | 56 | 5.187  | -17.464 | -2.552 | 1.00 | 0.00 |
| ATOM | 893 | OD1 | ASP | 56 | 5.621  | -17.551 | -3.721 | 1.00 | 0.00 |
| ATOM | 894 | OD2 | ASP | 56 | 4.632  | -18.395 | -1.934 | 1.00 | 0.00 |
| ATOM | 895 | C   | ASP | 56 | 4.685  | -14.361 | -3.572 | 1.00 | 0.00 |
| ATOM | 896 | O   | ASP | 56 | 4.459  | -13.144 | -3.599 | 1.00 | 0.00 |
| ATOM | 897 | N   | GLN | 57 | 3.921  | -15.220 | -4.258 | 1.00 | 0.00 |
| ATOM | 898 | H   | GLN | 57 | 4.151  | -16.204 | -4.250 | 1.00 | 0.00 |
| ATOM | 899 | CA  | GLN | 57 | 2.805  | -14.786 | -5.060 | 1.00 | 0.00 |
| ATOM | 900 | HA  | GLN | 57 | 2.975  | -13.771 | -5.419 | 1.00 | 0.00 |
| ATOM | 901 | CB  | GLN | 57 | 2.638  | -15.710 | -6.267 | 1.00 | 0.00 |
| ATOM | 902 | HB2 | GLN | 57 | 3.558  | -16.276 | -6.412 | 1.00 | 0.00 |
| ATOM | 903 | HB3 | GLN | 57 | 1.815  | -16.399 | -6.077 | 1.00 | 0.00 |
| ATOM | 904 | CG  | GLN | 57 | 2.339  | -14.895 | -7.524 | 1.00 | 0.00 |
| ATOM | 905 | HG2 | GLN | 57 | 2.948  | -13.991 | -7.507 | 1.00 | 0.00 |
| ATOM | 906 | HG3 | GLN | 57 | 2.570  | -15.472 | -8.420 | 1.00 | 0.00 |
| ATOM | 907 | CD  | GLN | 57 | 0.885  | -14.496 | -7.570 | 1.00 | 0.00 |
| ATOM | 908 | OE1 | GLN | 57 | -0.006 | -15.294 | -7.714 | 1.00 | 0.00 |



|      |     |      |     |    |        |         |        |      |      |
|------|-----|------|-----|----|--------|---------|--------|------|------|
| ATOM | 909 | NE2  | GLN | 57 | 0.617  | -13.223 | -7.470 | 1.00 | 0.00 |
| ATOM | 910 | HE21 | GLN | 57 | -0.343 | -12.909 | -7.496 | 1.00 | 0.00 |
| ATOM | 911 | HE22 | GLN | 57 | 1.370  | -12.558 | -7.367 | 1.00 | 0.00 |
| ATOM | 912 | C    | GLN | 57 | 1.529  | -14.745 | -4.246 | 1.00 | 0.00 |
| ATOM | 913 | O    | GLN | 57 | 0.598  | -14.003 | -4.539 | 1.00 | 0.00 |
| ATOM | 914 | N    | VAL | 58 | 1.489  | -15.521 | -3.171 | 1.00 | 0.00 |
| ATOM | 915 | H    | VAL | 58 | 2.267  | -16.141 | -2.997 | 1.00 | 0.00 |
| ATOM | 916 | CA   | VAL | 58 | 0.345  | -15.588 | -2.282 | 1.00 | 0.00 |
| ATOM | 917 | HA   | VAL | 58 | -0.593 | -15.578 | -2.837 | 1.00 | 0.00 |
| ATOM | 918 | CB   | VAL | 58 | 0.397  | -16.863 | -1.431 | 1.00 | 0.00 |
| ATOM | 919 | HB   | VAL | 58 | 0.736  | -16.609 | -0.427 | 1.00 | 0.00 |
| ATOM | 920 | CG1  | VAL | 58 | -0.992 | -17.504 | -1.354 | 1.00 | 0.00 |
| ATOM | 921 | HG11 | VAL | 58 | -1.331 | -17.759 | -2.358 | 1.00 | 0.00 |
| ATOM | 922 | HG12 | VAL | 58 | -0.942 | -18.409 | -0.747 | 1.00 | 0.00 |
| ATOM | 923 | HG13 | VAL | 58 | -1.692 | -16.802 | -0.902 | 1.00 | 0.00 |
| ATOM | 924 | CG2  | VAL | 58 | 1.404  | -17.872 | -1.993 | 1.00 | 0.00 |
| ATOM | 925 | HG21 | VAL | 58 | 2.398  | -17.426 | -2.006 | 1.00 | 0.00 |
| ATOM | 926 | HG22 | VAL | 58 | 1.415  | -18.764 | -1.366 | 1.00 | 0.00 |
| ATOM | 927 | HG23 | VAL | 58 | 1.116  | -18.147 | -3.008 | 1.00 | 0.00 |
| ATOM | 928 | C    | VAL | 58 | 0.300  | -14.328 | -1.439 | 1.00 | 0.00 |
| ATOM | 929 | O    | VAL | 58 | -0.643 | -14.153 | -0.670 | 1.00 | 0.00 |
| ATOM | 930 | N    | CYX | 59 | 1.285  | -13.442 | -1.615 | 1.00 | 0.00 |

|      |     |      |     |    |       |         |        |      |      |
|------|-----|------|-----|----|-------|---------|--------|------|------|
| ATOM | 931 | H    | CYX | 59 | 2.024 | -13.664 | -2.266 | 1.00 | 0.00 |
| ATOM | 932 | CA   | CYX | 59 | 1.360 | -12.205 | -0.899 | 1.00 | 0.00 |
| ATOM | 933 | HA   | CYX | 59 | 0.530 | -12.138 | -0.196 | 1.00 | 0.00 |
| ATOM | 934 | CB   | CYX | 59 | 2.650 | -12.109 | -0.130 | 1.00 | 0.00 |
| ATOM | 935 | HB2  | CYX | 59 | 3.470 | -12.473 | -0.749 | 1.00 | 0.00 |
| ATOM | 936 | HB3  | CYX | 59 | 2.835 | -11.070 | 0.143  | 1.00 | 0.00 |
| ATOM | 937 | SG   | CYX | 59 | 2.726 | -13.083 | 1.417  | 1.00 | 0.00 |
| ATOM | 938 | C    | CYX | 59 | 1.249 | -11.055 | -1.869 | 1.00 | 0.00 |
| ATOM | 939 | O    | CYX | 59 | 0.664 | -10.018 | -1.541 | 1.00 | 0.00 |
| ATOM | 940 | N    | VAL | 60 | 1.692 | -11.266 | -3.117 | 1.00 | 0.00 |
| ATOM | 941 | H    | VAL | 60 | 2.160 | -12.135 | -3.331 | 1.00 | 0.00 |
| ATOM | 942 | CA   | VAL | 60 | 1.590 | -10.269 | -4.158 | 1.00 | 0.00 |
| ATOM | 943 | HA   | VAL | 60 | 2.206 | -9.388  | -3.982 | 1.00 | 0.00 |
| ATOM | 944 | CB   | VAL | 60 | 1.981 | -10.876 | -5.500 | 1.00 | 0.00 |
| ATOM | 945 | HB   | VAL | 60 | 1.628 | -11.907 | -5.535 | 1.00 | 0.00 |
| ATOM | 946 | CG1  | VAL | 60 | 1.368 | -10.090 | -6.654 | 1.00 | 0.00 |
| ATOM | 947 | HG11 | VAL | 60 | 1.721 | -9.060  | -6.621 | 1.00 | 0.00 |
| ATOM | 948 | HG12 | VAL | 60 | 1.662 | -10.544 | -7.600 | 1.00 | 0.00 |
| ATOM | 949 | HG13 | VAL | 60 | 0.281 | -10.105 | -6.567 | 1.00 | 0.00 |
| ATOM | 950 | CG2  | VAL | 60 | 3.485 | -10.973 | -5.636 | 1.00 | 0.00 |
| ATOM | 951 | HG21 | VAL | 60 | 3.882 | -11.603 | -4.840 | 1.00 | 0.00 |
| ATOM | 952 | HG22 | VAL | 60 | 3.735 | -11.410 | -6.603 | 1.00 | 0.00 |

|      |     |          |    |        |         |        |      |      |
|------|-----|----------|----|--------|---------|--------|------|------|
| ATOM | 953 | HG23 VAL | 60 | 3.922  | -9.977  | -5.564 | 1.00 | 0.00 |
| ATOM | 954 | C VAL    | 60 | 0.190  | -9.700  | -4.188 | 1.00 | 0.00 |
| ATOM | 955 | O VAL    | 60 | -0.008 | -8.575  | -4.613 | 1.00 | 0.00 |
| ATOM | 956 | N CYX    | 61 | -0.802 | -10.475 | -3.757 | 1.00 | 0.00 |
| ATOM | 957 | H CYX    | 61 | -0.583 | -11.439 | -3.548 | 1.00 | 0.00 |
| ATOM | 958 | CA CYX   | 61 | -2.149 | -10.053 | -3.646 | 1.00 | 0.00 |
| ATOM | 959 | HA CYX   | 61 | -2.252 | -9.327  | -2.840 | 1.00 | 0.00 |
| ATOM | 960 | CB CYX   | 61 | -2.586 | -9.399  | -4.949 | 1.00 | 0.00 |
| ATOM | 961 | HB2 CYX  | 61 | -1.821 | -9.556  | -5.709 | 1.00 | 0.00 |
| ATOM | 962 | HB3 CYX  | 61 | -3.524 | -9.843  | -5.282 | 1.00 | 0.00 |
| ATOM | 963 | SG CYX   | 61 | -2.858 | -7.609  | -4.893 | 1.00 | 0.00 |
| ATOM | 964 | C CYX    | 61 | -3.012 | -11.251 | -3.270 | 1.00 | 0.00 |
| ATOM | 965 | O CYX    | 61 | -2.560 | -12.374 | -3.370 | 1.00 | 0.00 |
| ATOM | 966 | N PRO    | 62 | -4.261 | -10.995 | -2.847 | 1.00 | 0.00 |
| ATOM | 967 | CD PRO   | 62 | -5.270 | -11.948 | -2.430 | 1.00 | 0.00 |
| ATOM | 968 | HD2 PRO  | 62 | -4.916 | -12.446 | -1.527 | 1.00 | 0.00 |
| ATOM | 969 | HD3 PRO  | 62 | -5.394 | -12.684 | -3.225 | 1.00 | 0.00 |
| ATOM | 970 | CG PRO   | 62 | -6.544 | -11.126 | -2.189 | 1.00 | 0.00 |
| ATOM | 971 | HG2 PRO  | 62 | -6.828 | -11.220 | -1.141 | 1.00 | 0.00 |
| ATOM | 972 | HG3 PRO  | 62 | -7.341 | -11.523 | -2.818 | 1.00 | 0.00 |
| ATOM | 973 | CB PRO   | 62 | -6.231 | -9.674  | -2.555 | 1.00 | 0.00 |
| ATOM | 974 | HB2 PRO  | 62 | -6.577 | -8.964  | -1.805 | 1.00 | 0.00 |

|      |     |          |    |        |         |        |      |      |
|------|-----|----------|----|--------|---------|--------|------|------|
| ATOM | 975 | HB3 PRO  | 62 | -6.667 | -9.422  | -3.522 | 1.00 | 0.00 |
| ATOM | 976 | CA PRO   | 62 | -4.720 | -9.634  | -2.643 | 1.00 | 0.00 |
| ATOM | 977 | HA PRO   | 62 | -4.485 | -9.061  | -3.540 | 1.00 | 0.00 |
| ATOM | 978 | C PRO    | 62 | -4.080 | -8.990  | -1.459 | 1.00 | 0.00 |
| ATOM | 979 | O PRO    | 62 | -4.367 | -7.871  | -1.165 | 1.00 | 0.00 |
| ATOM | 980 | N THR    | 63 | -3.248 | -9.702  | -0.744 | 1.00 | 0.00 |
| ATOM | 981 | H THR    | 63 | -3.155 | -10.670 | -1.018 | 1.00 | 0.00 |
| ATOM | 982 | CA THR   | 63 | -2.513 | -9.245  | 0.409  | 1.00 | 0.00 |
| ATOM | 983 | HA THR   | 63 | -3.216 | -9.338  | 1.237  | 1.00 | 0.00 |
| ATOM | 984 | CB THR   | 63 | -1.333 | -10.177 | 0.665  | 1.00 | 0.00 |
| ATOM | 985 | HB THR   | 63 | -0.424 | -9.669  | 0.343  | 1.00 | 0.00 |
| ATOM | 986 | CG2 THR  | 63 | -1.209 | -10.555 | 2.117  | 1.00 | 0.00 |
| ATOM | 987 | HG21 THR | 63 | -2.117 | -11.064 | 2.439  | 1.00 | 0.00 |
| ATOM | 988 | HG22 THR | 63 | -0.355 | -11.219 | 2.248  | 1.00 | 0.00 |
| ATOM | 989 | HG23 THR | 63 | -1.065 | -9.656  | 2.716  | 1.00 | 0.00 |
| ATOM | 990 | OG1 THR  | 63 | -1.648 | -11.400 | 0.012  | 1.00 | 0.00 |
| ATOM | 991 | HG1 THR  | 63 | -0.932 | -12.027 | 0.143  | 1.00 | 0.00 |
| ATOM | 992 | C THR    | 63 | -2.043 | -7.837  | 0.236  | 1.00 | 0.00 |
| ATOM | 993 | O THR    | 63 | -2.358 | -7.060  | 1.113  | 1.00 | 0.00 |
| ATOM | 994 | N LEU    | 64 | -1.442 | -7.488  | -0.901 | 1.00 | 0.00 |
| ATOM | 995 | H LEU    | 64 | -1.256 | -8.213  | -1.580 | 1.00 | 0.00 |
| ATOM | 996 | CA LEU   | 64 | -1.002 | -6.139  | -1.197 | 1.00 | 0.00 |

|      |      |      |     |    |        |        |        |      |      |
|------|------|------|-----|----|--------|--------|--------|------|------|
| ATOM | 997  | HA   | LEU | 64 | -0.134 | -5.885 | -0.589 | 1.00 | 0.00 |
| ATOM | 998  | CB   | LEU | 64 | -0.613 | -6.034 | -2.670 | 1.00 | 0.00 |
| ATOM | 999  | HB2  | LEU | 64 | -0.432 | -7.063 | -2.980 | 1.00 | 0.00 |
| ATOM | 1000 | HB3  | LEU | 64 | -1.448 | -5.626 | -3.239 | 1.00 | 0.00 |
| ATOM | 1001 | CG   | LEU | 64 | 0.643  | -5.193 | -2.931 | 1.00 | 0.00 |
| ATOM | 1002 | HG   | LEU | 64 | 1.285  | -5.233 | -2.051 | 1.00 | 0.00 |
| ATOM | 1003 | CD1  | LEU | 64 | 1.397  | -5.723 | -4.129 | 1.00 | 0.00 |
| ATOM | 1004 | HD11 | LEU | 64 | 0.756  | -5.683 | -5.010 | 1.00 | 0.00 |
| ATOM | 1005 | HD12 | LEU | 64 | 2.285  | -5.114 | -4.299 | 1.00 | 0.00 |
| ATOM | 1006 | HD13 | LEU | 64 | 1.695  | -6.755 | -3.944 | 1.00 | 0.00 |
| ATOM | 1007 | CD2  | LEU | 64 | 0.289  | -3.722 | -3.129 | 1.00 | 0.00 |
| ATOM | 1008 | HD21 | LEU | 64 | -0.204 | -3.343 | -2.234 | 1.00 | 0.00 |
| ATOM | 1009 | HD22 | LEU | 64 | 1.199  | -3.151 | -3.312 | 1.00 | 0.00 |
| ATOM | 1010 | HD23 | LEU | 64 | -0.381 | -3.621 | -3.983 | 1.00 | 0.00 |
| ATOM | 1011 | C    | LEU | 64 | -2.077 | -5.130 | -0.869 | 1.00 | 0.00 |
| ATOM | 1012 | O    | LEU | 64 | -1.763 | -4.112 | -0.264 | 1.00 | 0.00 |
| ATOM | 1013 | N    | LYS | 65 | -3.348 | -5.460 | -1.159 | 1.00 | 0.00 |
| ATOM | 1014 | H    | LYS | 65 | -3.491 | -6.281 | -1.731 | 1.00 | 0.00 |
| ATOM | 1015 | CA   | LYS | 65 | -4.498 | -4.667 | -0.803 | 1.00 | 0.00 |
| ATOM | 1016 | HA   | LYS | 65 | -4.554 | -3.798 | -1.459 | 1.00 | 0.00 |
| ATOM | 1017 | CB   | LYS | 65 | -5.799 | -5.470 | -0.942 | 1.00 | 0.00 |
| ATOM | 1018 | HB2  | LYS | 65 | -5.913 | -5.776 | -1.982 | 1.00 | 0.00 |

|      |      |     |     |    |         |        |        |      |      |
|------|------|-----|-----|----|---------|--------|--------|------|------|
| ATOM | 1019 | HB3 | LYS | 65 | -5.734  | -6.355 | -0.309 | 1.00 | 0.00 |
| ATOM | 1020 | CG  | LYS | 65 | -7.002  | -4.634 | -0.524 | 1.00 | 0.00 |
| ATOM | 1021 | HG2 | LYS | 65 | -6.739  | -3.580 | -0.611 | 1.00 | 0.00 |
| ATOM | 1022 | HG3 | LYS | 65 | -7.831  | -4.858 | -1.196 | 1.00 | 0.00 |
| ATOM | 1023 | CD  | LYS | 65 | -7.419  | -4.939 | 0.921  | 1.00 | 0.00 |
| ATOM | 1024 | HD2 | LYS | 65 | -6.604  | -5.459 | 1.424  | 1.00 | 0.00 |
| ATOM | 1025 | HD3 | LYS | 65 | -7.625  | -4.002 | 1.437  | 1.00 | 0.00 |
| ATOM | 1026 | CE  | LYS | 65 | -8.671  | -5.817 | 0.940  | 1.00 | 0.00 |
| ATOM | 1027 | HE2 | LYS | 65 | -9.233  | -5.656 | 0.020  | 1.00 | 0.00 |
| ATOM | 1028 | HE3 | LYS | 65 | -8.372  | -6.863 | 1.003  | 1.00 | 0.00 |
| ATOM | 1029 | NZ  | LYS | 65 | -9.518  | -5.477 | 2.100  | 1.00 | 0.00 |
| ATOM | 1030 | HZ1 | LYS | 65 | -9.796  | -4.508 | 2.041  | 1.00 | 0.00 |
| ATOM | 1031 | HZ2 | LYS | 65 | -10.340 | -6.064 | 2.100  | 1.00 | 0.00 |
| ATOM | 1032 | HZ3 | LYS | 65 | -8.997  | -5.627 | 2.952  | 1.00 | 0.00 |
| ATOM | 1033 | C   | LYS | 65 | -4.317  | -4.096 | 0.585  | 1.00 | 0.00 |
| ATOM | 1034 | O   | LYS | 65 | -4.765  | -3.018 | 0.824  | 1.00 | 0.00 |
| ATOM | 1035 | N   | GLN | 66 | -3.685  | -4.792 | 1.509  | 1.00 | 0.00 |
| ATOM | 1036 | H   | GLN | 66 | -3.497  | -5.754 | 1.265  | 1.00 | 0.00 |
| ATOM | 1037 | CA  | GLN | 66 | -3.331  | -4.347 | 2.806  | 1.00 | 0.00 |
| ATOM | 1038 | HA  | GLN | 66 | -4.218  | -3.971 | 3.316  | 1.00 | 0.00 |
| ATOM | 1039 | CB  | GLN | 66 | -2.735  | -5.487 | 3.638  | 1.00 | 0.00 |
| ATOM | 1040 | HB2 | GLN | 66 | -3.442  | -6.316 | 3.670  | 1.00 | 0.00 |

|      |      |      |     |    |        |        |       |      |      |
|------|------|------|-----|----|--------|--------|-------|------|------|
| ATOM | 1041 | HB3  | GLN | 66 | -1.805 | -5.821 | 3.177 | 1.00 | 0.00 |
| ATOM | 1042 | CG   | GLN | 66 | -2.451 | -4.999 | 5.071 | 1.00 | 0.00 |
| ATOM | 1043 | HG2  | GLN | 66 | -2.173 | -5.808 | 5.747 | 1.00 | 0.00 |
| ATOM | 1044 | HG3  | GLN | 66 | -1.623 | -4.295 | 4.988 | 1.00 | 0.00 |
| ATOM | 1045 | CD   | GLN | 66 | -3.656 | -4.268 | 5.655 | 1.00 | 0.00 |
| ATOM | 1046 | OE1  | GLN | 66 | -3.543 | -3.235 | 6.291 | 1.00 | 0.00 |
| ATOM | 1047 | NE2  | GLN | 66 | -4.844 | -4.782 | 5.349 | 1.00 | 0.00 |
| ATOM | 1048 | HE21 | GLN | 66 | -5.685 | -4.348 | 5.702 | 1.00 | 0.00 |
| ATOM | 1049 | HE22 | GLN | 66 | -4.900 | -5.604 | 4.765 | 1.00 | 0.00 |
| ATOM | 1050 | C    | GLN | 66 | -2.385 | -3.173 | 2.788 | 1.00 | 0.00 |
| ATOM | 1051 | O    | GLN | 66 | -2.776 | -2.070 | 3.149 | 1.00 | 0.00 |
| ATOM | 1052 | N    | ALA | 67 | -1.130 | -3.396 | 2.404 | 1.00 | 0.00 |
| ATOM | 1053 | H    | ALA | 67 | -0.831 | -4.343 | 2.217 | 1.00 | 0.00 |
| ATOM | 1054 | CA   | ALA | 67 | -0.154 | -2.337 | 2.302 | 1.00 | 0.00 |
| ATOM | 1055 | HA   | ALA | 67 | 0.065  | -1.926 | 3.287 | 1.00 | 0.00 |
| ATOM | 1056 | CB   | ALA | 67 | 1.134  | -2.897 | 1.711 | 1.00 | 0.00 |
| ATOM | 1057 | HB1  | ALA | 67 | 0.933  | -3.304 | 0.720 | 1.00 | 0.00 |
| ATOM | 1058 | HB2  | ALA | 67 | 1.875  | -2.101 | 1.633 | 1.00 | 0.00 |
| ATOM | 1059 | HB3  | ALA | 67 | 1.517  | -3.687 | 2.357 | 1.00 | 0.00 |
| ATOM | 1060 | C    | ALA | 67 | -0.707 | -1.193 | 1.459 | 1.00 | 0.00 |
| ATOM | 1061 | O    | ALA | 67 | -0.329 | -0.051 | 1.655 | 1.00 | 0.00 |
| ATOM | 1062 | N    | ALA | 68 | -1.684 | -1.468 | 0.602 | 1.00 | 0.00 |

|      |      |     |     |    |        |        |        |      |      |
|------|------|-----|-----|----|--------|--------|--------|------|------|
| ATOM | 1063 | H   | ALA | 68 | -1.959 | -2.433 | 0.487  | 1.00 | 0.00 |
| ATOM | 1064 | CA  | ALA | 68 | -2.328 | -0.477 | -0.207 | 1.00 | 0.00 |
| ATOM | 1065 | HA  | ALA | 68 | -1.638 | 0.335  | -0.438 | 1.00 | 0.00 |
| ATOM | 1066 | CB  | ALA | 68 | -2.766 | -1.130 | -1.512 | 1.00 | 0.00 |
| ATOM | 1067 | HB1 | ALA | 68 | -3.464 | -1.939 | -1.298 | 1.00 | 0.00 |
| ATOM | 1068 | HB2 | ALA | 68 | -3.254 | -0.388 | -2.145 | 1.00 | 0.00 |
| ATOM | 1069 | HB3 | ALA | 68 | -1.894 | -1.531 | -2.029 | 1.00 | 0.00 |
| ATOM | 1070 | C   | ALA | 68 | -3.507 | 0.141  | 0.531  | 1.00 | 0.00 |
| ATOM | 1071 | O   | ALA | 68 | -3.879 | 1.292  | 0.330  | 1.00 | 0.00 |
| ATOM | 1072 | N   | LYS | 69 | -4.119 | -0.600 | 1.443  | 1.00 | 0.00 |
| ATOM | 1073 | H   | LYS | 69 | -3.820 | -1.561 | 1.526  | 1.00 | 0.00 |
| ATOM | 1074 | CA  | LYS | 69 | -5.223 | -0.159 | 2.246  | 1.00 | 0.00 |
| ATOM | 1075 | HA  | LYS | 69 | -5.925 | 0.399  | 1.626  | 1.00 | 0.00 |
| ATOM | 1076 | CB  | LYS | 69 | -5.961 | -1.352 | 2.870  | 1.00 | 0.00 |
| ATOM | 1077 | HB2 | LYS | 69 | -6.319 | -2.001 | 2.071  | 1.00 | 0.00 |
| ATOM | 1078 | HB3 | LYS | 69 | -5.265 | -1.905 | 3.502  | 1.00 | 0.00 |
| ATOM | 1079 | CG  | LYS | 69 | -7.148 | -0.878 | 3.712  | 1.00 | 0.00 |
| ATOM | 1080 | HG2 | LYS | 69 | -7.775 | -1.739 | 3.946  | 1.00 | 0.00 |
| ATOM | 1081 | HG3 | LYS | 69 | -6.768 | -0.444 | 4.637  | 1.00 | 0.00 |
| ATOM | 1082 | CD  | LYS | 69 | -7.979 | 0.171  | 2.957  | 1.00 | 0.00 |
| ATOM | 1083 | HD2 | LYS | 69 | -7.436 | 1.116  | 2.963  | 1.00 | 0.00 |
| ATOM | 1084 | HD3 | LYS | 69 | -8.111 | -0.165 | 1.928  | 1.00 | 0.00 |



|      |      |     |     |    |         |        |       |      |      |
|------|------|-----|-----|----|---------|--------|-------|------|------|
| ATOM | 1085 | CE  | LYS | 69 | -9.341  | 0.365  | 3.606 | 1.00 | 0.00 |
| ATOM | 1086 | HE2 | LYS | 69 | -10.069 | -0.263 | 3.092 | 1.00 | 0.00 |
| ATOM | 1087 | HE3 | LYS | 69 | -9.279  | 0.066  | 4.652 | 1.00 | 0.00 |
| ATOM | 1088 | NZ  | LYS | 69 | -9.763  | 1.776  | 3.522 | 1.00 | 0.00 |
| ATOM | 1089 | HZ1 | LYS | 69 | -9.821  | 2.052  | 2.552 | 1.00 | 0.00 |
| ATOM | 1090 | HZ2 | LYS | 69 | -10.668 | 1.883  | 3.958 | 1.00 | 0.00 |
| ATOM | 1091 | HZ3 | LYS | 69 | -9.089  | 2.358  | 3.998 | 1.00 | 0.00 |
| ATOM | 1092 | C   | LYS | 69 | -4.712  | 0.812  | 3.281 | 1.00 | 0.00 |
| ATOM | 1093 | O   | LYS | 69 | -5.398  | 1.762  | 3.599 | 1.00 | 0.00 |
| ATOM | 1094 | N   | SER | 70 | -3.491  | 0.626  | 3.766 | 1.00 | 0.00 |
| ATOM | 1095 | H   | SER | 70 | -2.972  | -0.189 | 3.472 | 1.00 | 0.00 |
| ATOM | 1096 | CA  | SER | 70 | -2.885  | 1.512  | 4.736 | 1.00 | 0.00 |
| ATOM | 1097 | HA  | SER | 70 | -3.653  | 2.128  | 5.204 | 1.00 | 0.00 |
| ATOM | 1098 | CB  | SER | 70 | -2.176  | 0.711  | 5.820 | 1.00 | 0.00 |
| ATOM | 1099 | HB2 | SER | 70 | -2.892  | 0.019  | 6.264 | 1.00 | 0.00 |
| ATOM | 1100 | HB3 | SER | 70 | -1.364  | 0.147  | 5.360 | 1.00 | 0.00 |
| ATOM | 1101 | OG  | SER | 70 | -1.650  | 1.560  | 6.829 | 1.00 | 0.00 |
| ATOM | 1102 | HG  | SER | 70 | -1.210  | 1.029  | 7.497 | 1.00 | 0.00 |
| ATOM | 1103 | C   | SER | 70 | -1.914  | 2.449  | 4.044 | 1.00 | 0.00 |
| ATOM | 1104 | O   | SER | 70 | -1.110  | 3.137  | 4.675 | 1.00 | 0.00 |
| ATOM | 1105 | N   | VAL | 71 | -1.974  | 2.502  | 2.708 | 1.00 | 0.00 |
| ATOM | 1106 | H   | VAL | 71 | -2.590  | 1.872  | 2.214 | 1.00 | 0.00 |

|      |      |      |     |    |        |       |        |      |      |
|------|------|------|-----|----|--------|-------|--------|------|------|
| ATOM | 1107 | CA   | VAL | 71 | -1.118 | 3.374 | 1.932  | 1.00 | 0.00 |
| ATOM | 1108 | HA   | VAL | 71 | -0.061 | 3.276 | 2.179  | 1.00 | 0.00 |
| ATOM | 1109 | CB   | VAL | 71 | -1.299 | 3.090 | 0.441  | 1.00 | 0.00 |
| ATOM | 1110 | HB   | VAL | 71 | -1.767 | 2.111 | 0.328  | 1.00 | 0.00 |
| ATOM | 1111 | CG1  | VAL | 71 | -2.162 | 4.138 | -0.216 | 1.00 | 0.00 |
| ATOM | 1112 | HG11 | VAL | 71 | -1.695 | 5.116 | -0.104 | 1.00 | 0.00 |
| ATOM | 1113 | HG12 | VAL | 71 | -2.271 | 3.907 | -1.276 | 1.00 | 0.00 |
| ATOM | 1114 | HG13 | VAL | 71 | -3.144 | 4.148 | 0.256  | 1.00 | 0.00 |
| ATOM | 1115 | CG2  | VAL | 71 | 0.032  | 2.972 | -0.273 | 1.00 | 0.00 |
| ATOM | 1116 | HG21 | VAL | 71 | 0.608  | 2.156 | 0.164  | 1.00 | 0.00 |
| ATOM | 1117 | HG22 | VAL | 71 | -0.139 | 2.770 | -1.331 | 1.00 | 0.00 |
| ATOM | 1118 | HG23 | VAL | 71 | 0.586  | 3.904 | -0.167 | 1.00 | 0.00 |
| ATOM | 1119 | C    | VAL | 71 | -1.427 | 4.817 | 2.304  | 1.00 | 0.00 |
| ATOM | 1120 | O    | VAL | 71 | -0.717 | 5.741 | 1.966  | 1.00 | 0.00 |
| ATOM | 1121 | N    | ARG | 72 | -2.553 | 5.071 | 2.964  | 1.00 | 0.00 |
| ATOM | 1122 | H    | ARG | 72 | -3.186 | 4.306 | 3.151  | 1.00 | 0.00 |
| ATOM | 1123 | CA   | ARG | 72 | -2.932 | 6.389 | 3.394  | 1.00 | 0.00 |
| ATOM | 1124 | HA   | ARG | 72 | -2.054 | 6.958 | 3.699  | 1.00 | 0.00 |
| ATOM | 1125 | CB   | ARG | 72 | -3.608 | 7.118 | 2.230  | 1.00 | 0.00 |
| ATOM | 1126 | HB2  | ARG | 72 | -3.589 | 6.475 | 1.349  | 1.00 | 0.00 |
| ATOM | 1127 | HB3  | ARG | 72 | -4.642 | 7.334 | 2.499  | 1.00 | 0.00 |
| ATOM | 1128 | CG   | ARG | 72 | -2.878 | 8.424 | 1.923  | 1.00 | 0.00 |

|      |      |          |    |        |        |       |      |      |
|------|------|----------|----|--------|--------|-------|------|------|
| ATOM | 1129 | HG2 ARG  | 72 | -1.946 | 8.438  | 2.487 | 1.00 | 0.00 |
| ATOM | 1130 | HG3 ARG  | 72 | -2.657 | 8.452  | 0.856 | 1.00 | 0.00 |
| ATOM | 1131 | CD ARG   | 72 | -3.717 | 9.638  | 2.299 | 1.00 | 0.00 |
| ATOM | 1132 | HD2 ARG  | 72 | -4.450 | 9.818  | 1.512 | 1.00 | 0.00 |
| ATOM | 1133 | HD3 ARG  | 72 | -4.234 | 9.432  | 3.236 | 1.00 | 0.00 |
| ATOM | 1134 | NE ARG   | 72 | -2.902 | 10.845 | 2.467 | 1.00 | 0.00 |
| ATOM | 1135 | HE ARG   | 72 | -2.949 | 11.532 | 1.729 | 1.00 | 0.00 |
| ATOM | 1136 | CZ ARG   | 72 | -2.109 | 11.082 | 3.504 | 1.00 | 0.00 |
| ATOM | 1137 | NH1 ARG  | 72 | -2.050 | 10.225 | 4.499 | 1.00 | 0.00 |
| ATOM | 1138 | HH11 ARG | 72 | -2.610 | 9.385  | 4.472 | 1.00 | 0.00 |
| ATOM | 1139 | HH12 ARG | 72 | -1.445 | 10.410 | 5.286 | 1.00 | 0.00 |
| ATOM | 1140 | NH2 ARG  | 72 | -1.394 | 12.177 | 3.545 | 1.00 | 0.00 |
| ATOM | 1141 | HH21 ARG | 72 | -1.448 | 12.840 | 2.785 | 1.00 | 0.00 |
| ATOM | 1142 | HH22 ARG | 72 | -0.792 | 12.353 | 4.336 | 1.00 | 0.00 |
| ATOM | 1143 | C ARG    | 72 | -3.857 | 6.296  | 4.579 | 1.00 | 0.00 |
| ATOM | 1144 | O ARG    | 72 | -3.452 | 6.638  | 5.682 | 1.00 | 0.00 |
| ATOM | 1145 | N VAL    | 73 | -5.122 | 5.929  | 4.313 | 1.00 | 0.00 |
| ATOM | 1146 | H VAL    | 73 | -5.396 | 5.775  | 3.353 | 1.00 | 0.00 |
| ATOM | 1147 | CA VAL   | 73 | -6.134 | 5.828  | 5.338 | 1.00 | 0.00 |
| ATOM | 1148 | HA VAL   | 73 | -6.418 | 6.797  | 5.748 | 1.00 | 0.00 |
| ATOM | 1149 | CB VAL   | 73 | -7.382 | 5.156  | 4.765 | 1.00 | 0.00 |
| ATOM | 1150 | HB VAL   | 73 | -7.552 | 5.551  | 3.764 | 1.00 | 0.00 |

|      |      |          |    |        |       |        |      |      |
|------|------|----------|----|--------|-------|--------|------|------|
| ATOM | 1151 | CG1 VAL  | 73 | -7.234 | 3.643 | 4.694  | 1.00 | 0.00 |
| ATOM | 1152 | HG11 VAL | 73 | -7.064 | 3.246 | 5.695  | 1.00 | 0.00 |
| ATOM | 1153 | HG12 VAL | 73 | -8.144 | 3.207 | 4.281  | 1.00 | 0.00 |
| ATOM | 1154 | HG13 VAL | 73 | -6.388 | 3.389 | 4.055  | 1.00 | 0.00 |
| ATOM | 1155 | CG2 VAL  | 73 | -8.621 | 5.521 | 5.586  | 1.00 | 0.00 |
| ATOM | 1156 | HG21 VAL | 73 | -8.764 | 6.601 | 5.568  | 1.00 | 0.00 |
| ATOM | 1157 | HG22 VAL | 73 | -9.497 | 5.031 | 5.160  | 1.00 | 0.00 |
| ATOM | 1158 | HG23 VAL | 73 | -8.486 | 5.190 | 6.616  | 1.00 | 0.00 |
| ATOM | 1159 | C VAL    | 73 | -5.553 | 5.081 | 6.537  | 1.00 | 0.00 |
| ATOM | 1160 | O VAL    | 73 | -4.587 | 4.318 | 6.414  | 1.00 | 0.00 |
| ATOM | 1161 | N GLN    | 74 | -6.181 | 5.270 | 7.683  | 1.00 | 0.00 |
| ATOM | 1162 | H GLN    | 74 | -6.956 | 5.915 | 7.738  | 1.00 | 0.00 |
| ATOM | 1163 | CA GLN   | 74 | -5.737 | 4.625 | 8.901  | 1.00 | 0.00 |
| ATOM | 1164 | HA GLN   | 74 | -5.753 | 3.542 | 8.772  | 1.00 | 0.00 |
| ATOM | 1165 | CB GLN   | 74 | -4.307 | 5.056 | 9.247  | 1.00 | 0.00 |
| ATOM | 1166 | HB2 GLN  | 74 | -3.823 | 5.440 | 8.349  | 1.00 | 0.00 |
| ATOM | 1167 | HB3 GLN  | 74 | -4.344 | 5.840 | 10.003 | 1.00 | 0.00 |
| ATOM | 1168 | CG GLN   | 74 | -3.510 | 3.863 | 9.786  | 1.00 | 0.00 |
| ATOM | 1169 | HG2 GLN  | 74 | -4.204 | 3.176 | 10.271 | 1.00 | 0.00 |
| ATOM | 1170 | HG3 GLN  | 74 | -3.003 | 3.349 | 8.969  | 1.00 | 0.00 |
| ATOM | 1171 | CD GLN   | 74 | -2.468 | 4.302 | 10.805 | 1.00 | 0.00 |
| ATOM | 1172 | OE1 GLN  | 74 | -2.125 | 5.469 | 10.934 | 1.00 | 0.00 |

|      |      |      |     |    |         |       |        |      |      |
|------|------|------|-----|----|---------|-------|--------|------|------|
| ATOM | 1173 | NE2  | GLN | 74 | -1.937  | 3.335 | 11.531 | 1.00 | 0.00 |
| ATOM | 1174 | HE21 | GLN | 74 | -1.239  | 3.555 | 12.227 | 1.00 | 0.00 |
| ATOM | 1175 | HE22 | GLN | 74 | -2.232  | 2.379 | 11.387 | 1.00 | 0.00 |
| ATOM | 1176 | C    | GLN | 74 | -6.695  | 4.927 | 10.049 | 1.00 | 0.00 |
| ATOM | 1177 | O    | GLN | 74 | -6.299  | 5.103 | 11.195 | 1.00 | 0.00 |
| ATOM | 1178 | N    | GLY | 75 | -7.983  | 5.055 | 9.717  | 1.00 | 0.00 |
| ATOM | 1179 | H    | GLY | 75 | -8.264  | 4.950 | 8.752  | 1.00 | 0.00 |
| ATOM | 1180 | CA   | GLY | 75 | -9.004  | 5.342 | 10.702 | 1.00 | 0.00 |
| ATOM | 1181 | HA2  | GLY | 75 | -9.119  | 4.482 | 11.362 | 1.00 | 0.00 |
| ATOM | 1182 | HA3  | GLY | 75 | -8.705  | 6.211 | 11.287 | 1.00 | 0.00 |
| ATOM | 1183 | C    | GLY | 75 | -10.327 | 5.630 | 10.036 | 1.00 | 0.00 |
| ATOM | 1184 | O    | GLY | 75 | -11.315 | 4.954 | 10.306 | 1.00 | 0.00 |
| ATOM | 1185 | N    | GLN | 76 | -10.327 | 6.590 | 9.098  | 1.00 | 0.00 |
| ATOM | 1186 | H    | GLN | 76 | -9.475  | 7.096 | 8.905  | 1.00 | 0.00 |
| ATOM | 1187 | CA   | GLN | 76 | -11.529 | 6.973 | 8.387  | 1.00 | 0.00 |
| ATOM | 1188 | HA   | GLN | 76 | -11.841 | 6.154 | 7.739  | 1.00 | 0.00 |
| ATOM | 1189 | CB   | GLN | 76 | -12.674 | 7.296 | 9.355  | 1.00 | 0.00 |
| ATOM | 1190 | HB2  | GLN | 76 | -12.413 | 6.931 | 10.348 | 1.00 | 0.00 |
| ATOM | 1191 | HB3  | GLN | 76 | -12.816 | 8.376 | 9.390  | 1.00 | 0.00 |
| ATOM | 1192 | CG   | GLN | 76 | -13.970 | 6.627 | 8.890  | 1.00 | 0.00 |
| ATOM | 1193 | HG2  | GLN | 76 | -14.024 | 6.654 | 7.802  | 1.00 | 0.00 |
| ATOM | 1194 | HG3  | GLN | 76 | -13.997 | 5.591 | 9.228  | 1.00 | 0.00 |

|      |      |      |     |    |         |        |        |      |      |
|------|------|------|-----|----|---------|--------|--------|------|------|
| ATOM | 1195 | CD   | GLN | 76 | -15.178 | 7.353  | 9.454  | 1.00 | 0.00 |
| ATOM | 1196 | OE1  | GLN | 76 | -15.753 | 8.220  | 8.817  | 1.00 | 0.00 |
| ATOM | 1197 | NE2  | GLN | 76 | -15.550 | 6.988  | 10.664 | 1.00 | 0.00 |
| ATOM | 1198 | HE21 | GLN | 76 | -16.347 | 7.431  | 11.099 | 1.00 | 0.00 |
| ATOM | 1199 | HE22 | GLN | 76 | -15.037 | 6.267  | 11.151 | 1.00 | 0.00 |
| ATOM | 1200 | C    | GLN | 76 | -11.254 | 8.161  | 7.485  | 1.00 | 0.00 |
| ATOM | 1201 | O    | GLN | 76 | -11.075 | 9.288  | 7.934  | 1.00 | 0.00 |
| ATOM | 1202 | N    | HID | 77 | -11.137 | 7.893  | 6.186  | 1.00 | 0.00 |
| ATOM | 1203 | H    | HID | 77 | -11.121 | 6.930  | 5.882  | 1.00 | 0.00 |
| ATOM | 1204 | CA   | HID | 77 | -10.903 | 8.932  | 5.196  | 1.00 | 0.00 |
| ATOM | 1205 | HA   | HID | 77 | -11.072 | 9.916  | 5.633  | 1.00 | 0.00 |
| ATOM | 1206 | CB   | HID | 77 | -9.454  | 8.855  | 4.710  | 1.00 | 0.00 |
| ATOM | 1207 | HB2  | HID | 77 | -8.769  | 9.020  | 5.541  | 1.00 | 0.00 |
| ATOM | 1208 | HB3  | HID | 77 | -9.251  | 7.882  | 4.261  | 1.00 | 0.00 |
| ATOM | 1209 | CG   | HID | 77 | -9.123  | 9.888  | 3.667  | 1.00 | 0.00 |
| ATOM | 1210 | ND1  | HID | 77 | -8.503  | 11.090 | 3.932  | 1.00 | 0.00 |
| ATOM | 1211 | HD1  | HID | 77 | -8.209  | 11.412 | 4.843  | 1.00 | 0.00 |
| ATOM | 1212 | CE1  | HID | 77 | -8.358  | 11.758 | 2.771  | 1.00 | 0.00 |
| ATOM | 1213 | HE1  | HID | 77 | -7.877  | 12.736 | 2.756  | 1.00 | 0.00 |
| ATOM | 1214 | NE2  | HID | 77 | -8.882  | 11.018 | 1.779  | 1.00 | 0.00 |
| ATOM | 1215 | CD2  | HID | 77 | -9.358  | 9.835  | 2.315  | 1.00 | 0.00 |
| ATOM | 1216 | HD2  | HID | 77 | -9.813  | 9.086  | 1.666  | 1.00 | 0.00 |

|      |      |     |     |    |         |       |        |      |      |
|------|------|-----|-----|----|---------|-------|--------|------|------|
| ATOM | 1217 | C   | HID | 77 | -11.935 | 8.834 | 4.079  | 1.00 | 0.00 |
| ATOM | 1218 | O   | HID | 77 | -11.824 | 9.502 | 3.062  | 1.00 | 0.00 |
| ATOM | 1219 | N   | GLY | 78 | -12.944 | 7.982 | 4.264  | 1.00 | 0.00 |
| ATOM | 1220 | H   | GLY | 78 | -13.000 | 7.459 | 5.126  | 1.00 | 0.00 |
| ATOM | 1221 | CA  | GLY | 78 | -13.968 | 7.776 | 3.272  | 1.00 | 0.00 |
| ATOM | 1222 | HA2 | GLY | 78 | -14.633 | 6.979 | 3.607  | 1.00 | 0.00 |
| ATOM | 1223 | HA3 | GLY | 78 | -14.538 | 8.697 | 3.153  | 1.00 | 0.00 |
| ATOM | 1224 | C   | GLY | 78 | -13.365 | 7.385 | 1.921  | 1.00 | 0.00 |
| ATOM | 1225 | O   | GLY | 78 | -12.142 | 7.209 | 1.766  | 1.00 | 0.00 |
| ATOM | 1226 | N   | PRO | 79 | -14.242 | 7.183 | 0.937  | 1.00 | 0.00 |
| ATOM | 1227 | CD  | PRO | 79 | -15.689 | 7.311 | 1.038  | 1.00 | 0.00 |
| ATOM | 1228 | HD2 | PRO | 79 | -15.925 | 8.362 | 1.200  | 1.00 | 0.00 |
| ATOM | 1229 | HD3 | PRO | 79 | -16.021 | 6.728 | 1.897  | 1.00 | 0.00 |
| ATOM | 1230 | CG  | PRO | 79 | -16.253 | 6.778 | -0.283 | 1.00 | 0.00 |
| ATOM | 1231 | HG2 | PRO | 79 | -16.767 | 7.587 | -0.801 | 1.00 | 0.00 |
| ATOM | 1232 | HG3 | PRO | 79 | -16.961 | 5.977 | -0.069 | 1.00 | 0.00 |
| ATOM | 1233 | CB  | PRO | 79 | -15.066 | 6.255 | -1.101 | 1.00 | 0.00 |
| ATOM | 1234 | HB2 | PRO | 79 | -15.099 | 6.597 | -2.136 | 1.00 | 0.00 |
| ATOM | 1235 | HB3 | PRO | 79 | -15.034 | 5.165 | -1.080 | 1.00 | 0.00 |
| ATOM | 1236 | CA  | PRO | 79 | -13.833 | 6.826 | -0.404 | 1.00 | 0.00 |
| ATOM | 1237 | HA  | PRO | 79 | -13.109 | 6.014 | -0.333 | 1.00 | 0.00 |
| ATOM | 1238 | C   | PRO | 79 | -13.210 | 7.994 | -1.144 | 1.00 | 0.00 |

|      |      |     |     |    |         |        |        |      |      |
|------|------|-----|-----|----|---------|--------|--------|------|------|
| ATOM | 1239 | O   | PRO | 79 | -13.912 | 8.844  | -1.671 | 1.00 | 0.00 |
| ATOM | 1240 | N   | PHE | 80 | -11.872 | 8.033  | -1.169 | 1.00 | 0.00 |
| ATOM | 1241 | H   | PHE | 80 | -11.334 | 7.298  | -0.731 | 1.00 | 0.00 |
| ATOM | 1242 | CA  | PHE | 80 | -11.159 | 9.111  | -1.818 | 1.00 | 0.00 |
| ATOM | 1243 | HA  | PHE | 80 | -11.718 | 9.500  | -2.669 | 1.00 | 0.00 |
| ATOM | 1244 | CB  | PHE | 80 | -10.991 | 10.231 | -0.791 | 1.00 | 0.00 |
| ATOM | 1245 | HB2 | PHE | 80 | -11.835 | 10.238 | -0.101 | 1.00 | 0.00 |
| ATOM | 1246 | HB3 | PHE | 80 | -10.067 | 10.082 | -0.233 | 1.00 | 0.00 |
| ATOM | 1247 | CG  | PHE | 80 | -10.914 | 11.608 | -1.392 | 1.00 | 0.00 |
| ATOM | 1248 | CD1 | PHE | 80 | -12.084 | 12.249 | -1.821 | 1.00 | 0.00 |
| ATOM | 1249 | HD1 | PHE | 80 | -13.045 | 11.745 | -1.720 | 1.00 | 0.00 |
| ATOM | 1250 | CE1 | PHE | 80 | -12.021 | 13.536 | -2.380 | 1.00 | 0.00 |
| ATOM | 1251 | HE1 | PHE | 80 | -12.937 | 14.026 | -2.711 | 1.00 | 0.00 |
| ATOM | 1252 | CZ  | PHE | 80 | -10.788 | 14.190 | -2.514 | 1.00 | 0.00 |
| ATOM | 1253 | HZ  | PHE | 80 | -10.733 | 15.187 | -2.950 | 1.00 | 0.00 |
| ATOM | 1254 | CE2 | PHE | 80 | -9.618  | 13.548 | -2.081 | 1.00 | 0.00 |
| ATOM | 1255 | HE2 | PHE | 80 | -8.657  | 14.052 | -2.180 | 1.00 | 0.00 |
| ATOM | 1256 | CD2 | PHE | 80 | -9.682  | 12.262 | -1.522 | 1.00 | 0.00 |
| ATOM | 1257 | HD2 | PHE | 80 | -8.770  | 11.767 | -1.187 | 1.00 | 0.00 |
| ATOM | 1258 | C   | PHE | 80 | -9.796  | 8.645  | -2.296 | 1.00 | 0.00 |
| ATOM | 1259 | O   | PHE | 80 | -9.500  | 8.611  | -3.479 | 1.00 | 0.00 |
| ATOM | 1260 | N   | GLN | 81 | -8.948  | 8.248  | -1.339 | 1.00 | 0.00 |



|      |      |      |     |    |        |        |        |      |      |
|------|------|------|-----|----|--------|--------|--------|------|------|
| ATOM | 1261 | H    | GLN | 81 | -9.254 | 8.249  | -0.377 | 1.00 | 0.00 |
| ATOM | 1262 | CA   | GLN | 81 | -7.597 | 7.832  | -1.627 | 1.00 | 0.00 |
| ATOM | 1263 | HA   | GLN | 81 | -7.139 | 8.549  | -2.308 | 1.00 | 0.00 |
| ATOM | 1264 | CB   | GLN | 81 | -6.751 | 7.751  | -0.363 | 1.00 | 0.00 |
| ATOM | 1265 | HB2  | GLN | 81 | -7.105 | 6.915  | 0.241  | 1.00 | 0.00 |
| ATOM | 1266 | HB3  | GLN | 81 | -5.713 | 7.578  | -0.648 | 1.00 | 0.00 |
| ATOM | 1267 | CG   | GLN | 81 | -6.848 | 9.038  | 0.445  | 1.00 | 0.00 |
| ATOM | 1268 | HG2  | GLN | 81 | -5.994 | 9.665  | 0.189  | 1.00 | 0.00 |
| ATOM | 1269 | HG3  | GLN | 81 | -7.771 | 9.569  | 0.213  | 1.00 | 0.00 |
| ATOM | 1270 | CD   | GLN | 81 | -6.813 | 8.756  | 1.934  | 1.00 | 0.00 |
| ATOM | 1271 | OE1  | GLN | 81 | -7.137 | 7.693  | 2.431  | 1.00 | 0.00 |
| ATOM | 1272 | NE2  | GLN | 81 | -6.431 | 9.763  | 2.688  | 1.00 | 0.00 |
| ATOM | 1273 | HE21 | GLN | 81 | -6.383 | 9.649  | 3.690  | 1.00 | 0.00 |
| ATOM | 1274 | HE22 | GLN | 81 | -6.187 | 10.645 | 2.261  | 1.00 | 0.00 |
| ATOM | 1275 | C    | GLN | 81 | -7.666 | 6.492  | -2.282 | 1.00 | 0.00 |
| ATOM | 1276 | O    | GLN | 81 | -7.214 | 6.407  | -3.392 | 1.00 | 0.00 |
| ATOM | 1277 | N    | SER | 82 | -8.280 | 5.490  | -1.641 | 1.00 | 0.00 |
| ATOM | 1278 | H    | SER | 82 | -8.679 | 5.677  | -0.733 | 1.00 | 0.00 |
| ATOM | 1279 | CA   | SER | 82 | -8.398 | 4.147  | -2.181 | 1.00 | 0.00 |
| ATOM | 1280 | HA   | SER | 82 | -7.467 | 3.603  | -2.021 | 1.00 | 0.00 |
| ATOM | 1281 | CB   | SER | 82 | -9.530 | 3.389  | -1.495 | 1.00 | 0.00 |
| ATOM | 1282 | HB2  | SER | 82 | -9.267 | 3.276  | -0.444 | 1.00 | 0.00 |

|      |      |      |     |    |         |       |        |      |      |
|------|------|------|-----|----|---------|-------|--------|------|------|
| ATOM | 1283 | HB3  | SER | 82 | -10.434 | 3.991 | -1.580 | 1.00 | 0.00 |
| ATOM | 1284 | OG   | SER | 82 | -9.757  | 2.121 | -2.060 | 1.00 | 0.00 |
| ATOM | 1285 | HG   | SER | 82 | -10.476 | 1.687 | -1.595 | 1.00 | 0.00 |
| ATOM | 1286 | C    | SER | 82 | -8.683  | 4.193 | -3.665 | 1.00 | 0.00 |
| ATOM | 1287 | O    | SER | 82 | -7.980  | 3.569 | -4.416 | 1.00 | 0.00 |
| ATOM | 1288 | N    | THR | 83 | -9.620  | 5.039 | -4.081 | 1.00 | 0.00 |
| ATOM | 1289 | H    | THR | 83 | -10.187 | 5.514 | -3.393 | 1.00 | 0.00 |
| ATOM | 1290 | CA   | THR | 83 | -9.942  | 5.222 | -5.479 | 1.00 | 0.00 |
| ATOM | 1291 | HA   | THR | 83 | -10.521 | 4.355 | -5.798 | 1.00 | 0.00 |
| ATOM | 1292 | CB   | THR | 83 | -10.809 | 6.471 | -5.632 | 1.00 | 0.00 |
| ATOM | 1293 | HB   | THR | 83 | -10.634 | 7.098 | -4.758 | 1.00 | 0.00 |
| ATOM | 1294 | CG2  | THR | 83 | -10.512 | 7.269 | -6.898 | 1.00 | 0.00 |
| ATOM | 1295 | HG21 | THR | 83 | -10.687 | 6.642 | -7.773 | 1.00 | 0.00 |
| ATOM | 1296 | HG22 | THR | 83 | -11.165 | 8.141 | -6.940 | 1.00 | 0.00 |
| ATOM | 1297 | HG23 | THR | 83 | -9.472  | 7.594 | -6.887 | 1.00 | 0.00 |
| ATOM | 1298 | OG1  | THR | 83 | -12.124 | 6.015 | -5.756 | 1.00 | 0.00 |
| ATOM | 1299 | HG1  | THR | 83 | -12.715 | 6.765 | -5.856 | 1.00 | 0.00 |
| ATOM | 1300 | C    | THR | 83 | -8.687  | 5.259 | -6.341 | 1.00 | 0.00 |
| ATOM | 1301 | O    | THR | 83 | -8.362  | 4.298 | -7.040 | 1.00 | 0.00 |
| ATOM | 1302 | N    | ARG | 84 | -7.930  | 6.359 | -6.247 | 1.00 | 0.00 |
| ATOM | 1303 | H    | ARG | 84 | -8.210  | 7.101 | -5.623 | 1.00 | 0.00 |
| ATOM | 1304 | CA   | ARG | 84 | -6.733  | 6.533 | -7.016 | 1.00 | 0.00 |

|      |      |      |     |    |        |       |         |      |      |
|------|------|------|-----|----|--------|-------|---------|------|------|
| ATOM | 1305 | HA   | ARG | 84 | -6.930 | 6.287 | -8.060  | 1.00 | 0.00 |
| ATOM | 1306 | CB   | ARG | 84 | -6.241 | 7.979 | -6.939  | 1.00 | 0.00 |
| ATOM | 1307 | HB2  | ARG | 84 | -6.910 | 8.544 | -6.290  | 1.00 | 0.00 |
| ATOM | 1308 | HB3  | ARG | 84 | -5.235 | 7.987 | -6.519  | 1.00 | 0.00 |
| ATOM | 1309 | CG   | ARG | 84 | -6.218 | 8.620 | -8.332  | 1.00 | 0.00 |
| ATOM | 1310 | HG2  | ARG | 84 | -7.247 | 8.804 | -8.640  | 1.00 | 0.00 |
| ATOM | 1311 | HG3  | ARG | 84 | -5.684 | 9.568 | -8.263  | 1.00 | 0.00 |
| ATOM | 1312 | CD   | ARG | 84 | -5.530 | 7.721 | -9.364  | 1.00 | 0.00 |
| ATOM | 1313 | HD2  | ARG | 84 | -5.061 | 6.878 | -8.856  | 1.00 | 0.00 |
| ATOM | 1314 | HD3  | ARG | 84 | -6.270 | 7.350 | -10.074 | 1.00 | 0.00 |
| ATOM | 1315 | NE   | ARG | 84 | -4.495 | 8.461 | -10.105 | 1.00 | 0.00 |
| ATOM | 1316 | HE   | ARG | 84 | -4.163 | 9.309 | -9.668  | 1.00 | 0.00 |
| ATOM | 1317 | CZ   | ARG | 84 | -3.993 | 8.118 | -11.274 | 1.00 | 0.00 |
| ATOM | 1318 | NH1  | ARG | 84 | -4.454 | 7.065 | -11.908 | 1.00 | 0.00 |
| ATOM | 1319 | HH11 | ARG | 84 | -5.196 | 6.516 | -11.497 | 1.00 | 0.00 |
| ATOM | 1320 | HH12 | ARG | 84 | -4.065 | 6.808 | -12.804 | 1.00 | 0.00 |
| ATOM | 1321 | NH2  | ARG | 84 | -3.016 | 8.817 | -11.804 | 1.00 | 0.00 |
| ATOM | 1322 | HH21 | ARG | 84 | -2.649 | 9.619 | -11.313 | 1.00 | 0.00 |
| ATOM | 1323 | HH22 | ARG | 84 | -2.636 | 8.548 | -12.701 | 1.00 | 0.00 |
| ATOM | 1324 | C    | ARG | 84 | -5.662 | 5.618 | -6.497  | 1.00 | 0.00 |
| ATOM | 1325 | O    | ARG | 84 | -4.943 | 5.023 | -7.280  | 1.00 | 0.00 |
| ATOM | 1326 | N    | ILE | 85 | -5.497 | 5.549 | -5.184  | 1.00 | 0.00 |

|      |      |      |     |    |        |       |        |      |      |
|------|------|------|-----|----|--------|-------|--------|------|------|
| ATOM | 1327 | H    | ILE | 85 | -6.032 | 6.196 | -4.623 | 1.00 | 0.00 |
| ATOM | 1328 | CA   | ILE | 85 | -4.549 | 4.695 | -4.522 | 1.00 | 0.00 |
| ATOM | 1329 | HA   | ILE | 85 | -3.517 | 5.007 | -4.682 | 1.00 | 0.00 |
| ATOM | 1330 | CB   | ILE | 85 | -4.831 | 4.612 | -3.016 | 1.00 | 0.00 |
| ATOM | 1331 | HB   | ILE | 85 | -5.909 | 4.654 | -2.859 | 1.00 | 0.00 |
| ATOM | 1332 | CG2  | ILE | 85 | -4.283 | 3.318 | -2.428 | 1.00 | 0.00 |
| ATOM | 1333 | HG21 | ILE | 85 | -3.205 | 3.275 | -2.584 | 1.00 | 0.00 |
| ATOM | 1334 | HG22 | ILE | 85 | -4.496 | 3.284 | -1.360 | 1.00 | 0.00 |
| ATOM | 1335 | HG23 | ILE | 85 | -4.755 | 2.466 | -2.919 | 1.00 | 0.00 |
| ATOM | 1336 | CG1  | ILE | 85 | -4.289 | 5.854 | -2.287 | 1.00 | 0.00 |
| ATOM | 1337 | HG12 | ILE | 85 | -4.830 | 6.729 | -2.646 | 1.00 | 0.00 |
| ATOM | 1338 | HG13 | ILE | 85 | -4.465 | 5.732 | -1.218 | 1.00 | 0.00 |
| ATOM | 1339 | CD1  | ILE | 85 | -2.794 | 6.041 | -2.539 | 1.00 | 0.00 |
| ATOM | 1340 | HD11 | ILE | 85 | -2.618 | 6.163 | -3.608 | 1.00 | 0.00 |
| ATOM | 1341 | HD12 | ILE | 85 | -2.444 | 6.927 | -2.010 | 1.00 | 0.00 |
| ATOM | 1342 | HD13 | ILE | 85 | -2.252 | 5.166 | -2.180 | 1.00 | 0.00 |
| ATOM | 1343 | C    | ILE | 85 | -4.543 | 3.330 | -5.181 | 1.00 | 0.00 |
| ATOM | 1344 | O    | ILE | 85 | -3.489 | 2.748 | -5.332 | 1.00 | 0.00 |
| ATOM | 1345 | N    | TYR | 86 | -5.689 | 2.873 | -5.660 | 1.00 | 0.00 |
| ATOM | 1346 | H    | TYR | 86 | -6.504 | 3.459 | -5.550 | 1.00 | 0.00 |
| ATOM | 1347 | CA   | TYR | 86 | -5.837 | 1.629 | -6.346 | 1.00 | 0.00 |
| ATOM | 1348 | HA   | TYR | 86 | -5.151 | 0.875 | -5.960 | 1.00 | 0.00 |

|      |      |     |     |    |        |        |         |      |      |
|------|------|-----|-----|----|--------|--------|---------|------|------|
| ATOM | 1349 | CB  | TYR | 86 | -7.263 | 1.156  | -6.107  | 1.00 | 0.00 |
| ATOM | 1350 | HB2 | TYR | 86 | -7.883 | 2.051  | -6.067  | 1.00 | 0.00 |
| ATOM | 1351 | HB3 | TYR | 86 | -7.555 | 0.549  | -6.965  | 1.00 | 0.00 |
| ATOM | 1352 | CG  | TYR | 86 | -7.451 | 0.355  | -4.835  | 1.00 | 0.00 |
| ATOM | 1353 | CD1 | TYR | 86 | -7.139 | 0.914  | -3.584  | 1.00 | 0.00 |
| ATOM | 1354 | HD1 | TYR | 86 | -6.762 | 1.935  | -3.538  | 1.00 | 0.00 |
| ATOM | 1355 | CE1 | TYR | 86 | -7.307 | 0.174  | -2.404  | 1.00 | 0.00 |
| ATOM | 1356 | HE1 | TYR | 86 | -7.028 | 0.591  | -1.437  | 1.00 | 0.00 |
| ATOM | 1357 | CZ  | TYR | 86 | -7.792 | -1.139 | -2.488  | 1.00 | 0.00 |
| ATOM | 1358 | OH  | TYR | 86 | -8.004 | -1.832 | -1.344  | 1.00 | 0.00 |
| ATOM | 1359 | HH  | TYR | 86 | -7.790 | -1.329 | -0.555  | 1.00 | 0.00 |
| ATOM | 1360 | CE2 | TYR | 86 | -8.107 | -1.718 | -3.729  | 1.00 | 0.00 |
| ATOM | 1361 | HE2 | TYR | 86 | -8.485 | -2.739 | -3.788  | 1.00 | 0.00 |
| ATOM | 1362 | CD2 | TYR | 86 | -7.929 | -0.965 | -4.905  | 1.00 | 0.00 |
| ATOM | 1363 | HD2 | TYR | 86 | -8.162 | -1.406 | -5.875  | 1.00 | 0.00 |
| ATOM | 1364 | C   | TYR | 86 | -5.630 | 1.796  | -7.827  | 1.00 | 0.00 |
| ATOM | 1365 | O   | TYR | 86 | -4.963 | 0.994  | -8.461  | 1.00 | 0.00 |
| ATOM | 1366 | N   | GLN | 87 | -6.135 | 2.879  | -8.410  | 1.00 | 0.00 |
| ATOM | 1367 | H   | GLN | 87 | -6.695 | 3.507  | -7.851  | 1.00 | 0.00 |
| ATOM | 1368 | CA  | GLN | 87 | -5.967 | 3.176  | -9.808  | 1.00 | 0.00 |
| ATOM | 1369 | HA  | GLN | 87 | -6.297 | 2.327  | -10.407 | 1.00 | 0.00 |
| ATOM | 1370 | CB  | GLN | 87 | -6.791 | 4.398  | -10.199 | 1.00 | 0.00 |

|      |      |      |     |    |         |       |         |      |      |
|------|------|------|-----|----|---------|-------|---------|------|------|
| ATOM | 1371 | HB2  | GLN | 87 | -7.512  | 4.605 | -9.409  | 1.00 | 0.00 |
| ATOM | 1372 | HB3  | GLN | 87 | -6.123  | 5.252 | -10.314 | 1.00 | 0.00 |
| ATOM | 1373 | CG   | GLN | 87 | -7.533  | 4.151 | -11.514 | 1.00 | 0.00 |
| ATOM | 1374 | HG2  | GLN | 87 | -6.915  | 4.212 | -12.410 | 1.00 | 0.00 |
| ATOM | 1375 | HG3  | GLN | 87 | -7.908  | 3.134 | -11.401 | 1.00 | 0.00 |
| ATOM | 1376 | CD   | GLN | 87 | -8.719  | 5.092 | -11.675 | 1.00 | 0.00 |
| ATOM | 1377 | OE1  | GLN | 87 | -8.769  | 6.158 | -11.072 | 1.00 | 0.00 |
| ATOM | 1378 | NE2  | GLN | 87 | -9.585  | 4.758 | -12.597 | 1.00 | 0.00 |
| ATOM | 1379 | HE21 | GLN | 87 | -10.396 | 5.338 | -12.758 | 1.00 | 0.00 |
| ATOM | 1380 | HE22 | GLN | 87 | -9.438  | 3.921 | -13.144 | 1.00 | 0.00 |
| ATOM | 1381 | C    | GLN | 87 | -4.504  | 3.405 | -10.137 | 1.00 | 0.00 |
| ATOM | 1382 | O    | GLN | 87 | -4.129  | 3.503 | -11.299 | 1.00 | 0.00 |
| ATOM | 1383 | N    | ILE | 88 | -3.639  | 3.514 | -9.143  | 1.00 | 0.00 |
| ATOM | 1384 | H    | ILE | 88 | -4.012  | 3.520 | -8.204  | 1.00 | 0.00 |
| ATOM | 1385 | CA   | ILE | 88 | -2.226  | 3.696 | -9.315  | 1.00 | 0.00 |
| ATOM | 1386 | HA   | ILE | 88 | -1.950  | 3.696 | -10.370 | 1.00 | 0.00 |
| ATOM | 1387 | CB   | ILE | 88 | -1.800  | 5.019 | -8.676  | 1.00 | 0.00 |
| ATOM | 1388 | HB   | ILE | 88 | -2.143  | 5.037 | -7.642  | 1.00 | 0.00 |
| ATOM | 1389 | CG2  | ILE | 88 | -0.281  | 5.171 | -8.711  | 1.00 | 0.00 |
| ATOM | 1390 | HG21 | ILE | 88 | 0.063   | 5.153 | -9.745  | 1.00 | 0.00 |
| ATOM | 1391 | HG22 | ILE | 88 | -0.000  | 6.118 | -8.252  | 1.00 | 0.00 |
| ATOM | 1392 | HG23 | ILE | 88 | 0.180   | 4.350 | -8.161  | 1.00 | 0.00 |

|      |      |      |     |    |        |        |         |      |      |
|------|------|------|-----|----|--------|--------|---------|------|------|
| ATOM | 1393 | CG1  | ILE | 88 | -2.466 | 6.198  | -9.390  | 1.00 | 0.00 |
| ATOM | 1394 | HG12 | ILE | 88 | -1.923 | 6.413  | -10.310 | 1.00 | 0.00 |
| ATOM | 1395 | HG13 | ILE | 88 | -3.497 | 5.936  | -9.630  | 1.00 | 0.00 |
| ATOM | 1396 | CD1  | ILE | 88 | -2.451 | 7.438  | -8.485  | 1.00 | 0.00 |
| ATOM | 1397 | HD11 | ILE | 88 | -1.421 | 7.700  | -8.245  | 1.00 | 0.00 |
| ATOM | 1398 | HD12 | ILE | 88 | -2.927 | 8.271  | -9.002  | 1.00 | 0.00 |
| ATOM | 1399 | HD13 | ILE | 88 | -2.995 | 7.223  | -7.565  | 1.00 | 0.00 |
| ATOM | 1400 | C    | ILE | 88 | -1.501 | 2.504  | -8.725  | 1.00 | 0.00 |
| ATOM | 1401 | O    | ILE | 88 | -0.318 | 2.348  | -8.938  | 1.00 | 0.00 |
| ATOM | 1402 | N    | ALA | 89 | -2.201 | 1.643  | -8.007  | 1.00 | 0.00 |
| ATOM | 1403 | H    | ALA | 89 | -3.166 | 1.860  | -7.800  | 1.00 | 0.00 |
| ATOM | 1404 | CA   | ALA | 89 | -1.634 | 0.445  | -7.441  | 1.00 | 0.00 |
| ATOM | 1405 | HA   | ALA | 89 | -0.545 | 0.492  | -7.468  | 1.00 | 0.00 |
| ATOM | 1406 | CB   | ALA | 89 | -2.079 | 0.324  | -5.993  | 1.00 | 0.00 |
| ATOM | 1407 | HB1  | ALA | 89 | -3.167 | 0.266  | -5.950  | 1.00 | 0.00 |
| ATOM | 1408 | HB2  | ALA | 89 | -1.651 | -0.578 | -5.555  | 1.00 | 0.00 |
| ATOM | 1409 | HB3  | ALA | 89 | -1.740 | 1.196  | -5.434  | 1.00 | 0.00 |
| ATOM | 1410 | C    | ALA | 89 | -2.034 | -0.763 | -8.271  | 1.00 | 0.00 |
| ATOM | 1411 | O    | ALA | 89 | -1.698 | -1.897 | -7.942  | 1.00 | 0.00 |
| ATOM | 1412 | N    | LYS | 90 | -2.749 | -0.523 | -9.376  | 1.00 | 0.00 |
| ATOM | 1413 | H    | LYS | 90 | -3.054 | 0.422  | -9.561  | 1.00 | 0.00 |
| ATOM | 1414 | CA   | LYS | 90 | -3.200 | -1.576 | -10.262 | 1.00 | 0.00 |

|      |      |     |     |    |        |        |         |      |      |
|------|------|-----|-----|----|--------|--------|---------|------|------|
| ATOM | 1415 | HA  | LYS | 90 | -3.153 | -2.537 | -9.750  | 1.00 | 0.00 |
| ATOM | 1416 | CB  | LYS | 90 | -4.650 | -1.322 | -10.696 | 1.00 | 0.00 |
| ATOM | 1417 | HB2 | LYS | 90 | -5.167 | -2.282 | -10.712 | 1.00 | 0.00 |
| ATOM | 1418 | HB3 | LYS | 90 | -5.112 | -0.673 | -9.952  | 1.00 | 0.00 |
| ATOM | 1419 | CG  | LYS | 90 | -4.748 | -0.672 | -12.066 | 1.00 | 0.00 |
| ATOM | 1420 | HG2 | LYS | 90 | -4.165 | -1.263 | -12.773 | 1.00 | 0.00 |
| ATOM | 1421 | HG3 | LYS | 90 | -5.794 | -0.668 | -12.374 | 1.00 | 0.00 |
| ATOM | 1422 | CD  | LYS | 90 | -4.224 | 0.746  | -12.041 | 1.00 | 0.00 |
| ATOM | 1423 | HD2 | LYS | 90 | -4.909 | 1.364  | -11.460 | 1.00 | 0.00 |
| ATOM | 1424 | HD3 | LYS | 90 | -3.242 | 0.749  | -11.568 | 1.00 | 0.00 |
| ATOM | 1425 | CE  | LYS | 90 | -4.109 | 1.307  | -13.457 | 1.00 | 0.00 |
| ATOM | 1426 | HE2 | LYS | 90 | -3.684 | 0.538  | -14.103 | 1.00 | 0.00 |
| ATOM | 1427 | HE3 | LYS | 90 | -5.107 | 1.566  | -13.811 | 1.00 | 0.00 |
| ATOM | 1428 | NZ  | LYS | 90 | -3.251 | 2.504  | -13.488 | 1.00 | 0.00 |
| ATOM | 1429 | HZ1 | LYS | 90 | -2.326 | 2.264  | -13.161 | 1.00 | 0.00 |
| ATOM | 1430 | HZ2 | LYS | 90 | -3.193 | 2.852  | -14.434 | 1.00 | 0.00 |
| ATOM | 1431 | HZ3 | LYS | 90 | -3.645 | 3.216  | -12.891 | 1.00 | 0.00 |
| ATOM | 1432 | C   | LYS | 90 | -2.243 | -1.696 | -11.419 | 1.00 | 0.00 |
| ATOM | 1433 | O   | LYS | 90 | -2.261 | -2.670 | -12.153 | 1.00 | 0.00 |
| ATOM | 1434 | N   | ASN | 91 | -1.439 | -0.647 | -11.637 | 1.00 | 0.00 |
| ATOM | 1435 | H   | ASN | 91 | -1.536 | 0.168  | -11.049 | 1.00 | 0.00 |
| ATOM | 1436 | CA  | ASN | 91 | -0.457 | -0.618 | -12.684 | 1.00 | 0.00 |



|      |      |      |     |    |        |        |         |      |      |
|------|------|------|-----|----|--------|--------|---------|------|------|
| ATOM | 1437 | HA   | ASN | 91 | -0.778 | -1.255 | -13.509 | 1.00 | 0.00 |
| ATOM | 1438 | CB   | ASN | 91 | -0.274 | 0.807  | -13.209 | 1.00 | 0.00 |
| ATOM | 1439 | HB2  | ASN | 91 | 0.604  | 0.795  | -13.854 | 1.00 | 0.00 |
| ATOM | 1440 | HB3  | ASN | 91 | -1.143 | 1.125  | -13.785 | 1.00 | 0.00 |
| ATOM | 1441 | CG   | ASN | 91 | -0.043 | 1.798  | -12.100 | 1.00 | 0.00 |
| ATOM | 1442 | OD1  | ASN | 91 | 0.599  | 1.497  | -11.123 | 1.00 | 0.00 |
| ATOM | 1443 | ND2  | ASN | 91 | -0.628 | 2.971  | -12.252 | 1.00 | 0.00 |
| ATOM | 1444 | HD21 | ASN | 91 | -0.515 | 3.683  | -11.545 | 1.00 | 0.00 |
| ATOM | 1445 | HD22 | ASN | 91 | -1.186 | 3.150  | -13.075 | 1.00 | 0.00 |
| ATOM | 1446 | C    | ASN | 91 | 0.881  | -1.141 | -12.171 | 1.00 | 0.00 |
| ATOM | 1447 | O    | ASN | 91 | 1.877  | -1.106 | -12.885 | 1.00 | 0.00 |
| ATOM | 1448 | N    | LEU | 92 | 0.916  | -1.544 | -10.905 | 1.00 | 0.00 |
| ATOM | 1449 | H    | LEU | 92 | 0.097  | -1.415 | -10.328 | 1.00 | 0.00 |
| ATOM | 1450 | CA   | LEU | 92 | 2.098  | -2.094 | -10.297 | 1.00 | 0.00 |
| ATOM | 1451 | HA   | LEU | 92 | 2.970  | -1.499 | -10.567 | 1.00 | 0.00 |
| ATOM | 1452 | CB   | LEU | 92 | 1.950  | -2.083 | -8.769  | 1.00 | 0.00 |
| ATOM | 1453 | HB2  | LEU | 92 | 0.873  | -2.066 | -8.604  | 1.00 | 0.00 |
| ATOM | 1454 | HB3  | LEU | 92 | 2.368  | -2.996 | -8.344  | 1.00 | 0.00 |
| ATOM | 1455 | CG   | LEU | 92 | 2.590  | -0.865 | -8.093  | 1.00 | 0.00 |
| ATOM | 1456 | HG   | LEU | 92 | 2.408  | 0.019  | -8.704  | 1.00 | 0.00 |
| ATOM | 1457 | CD1  | LEU | 92 | 1.989  | -0.655 | -6.701  | 1.00 | 0.00 |
| ATOM | 1458 | HD11 | LEU | 92 | 2.171  | -1.539 | -6.089  | 1.00 | 0.00 |

|      |      |      |     |    |        |        |         |      |      |
|------|------|------|-----|----|--------|--------|---------|------|------|
| ATOM | 1459 | HD12 | LEU | 92 | 2.452  | 0.213  | -6.232  | 1.00 | 0.00 |
| ATOM | 1460 | HD13 | LEU | 92 | 0.915  | -0.490 | -6.790  | 1.00 | 0.00 |
| ATOM | 1461 | CD2  | LEU | 92 | 4.106  | -1.009 | -8.024  | 1.00 | 0.00 |
| ATOM | 1462 | HD21 | LEU | 92 | 4.509  | -1.100 | -9.033  | 1.00 | 0.00 |
| ATOM | 1463 | HD22 | LEU | 92 | 4.533  | -0.131 | -7.540  | 1.00 | 0.00 |
| ATOM | 1464 | HD23 | LEU | 92 | 4.361  | -1.900 | -7.450  | 1.00 | 0.00 |
| ATOM | 1465 | C    | LEU | 92 | 2.354  | -3.493 | -10.827 | 1.00 | 0.00 |
| ATOM | 1466 | O    | LEU | 92 | 3.436  | -3.752 | -11.312 | 1.00 | 0.00 |
| ATOM | 1467 | N    | PRO | 93 | 1.338  | -4.370 | -10.816 | 1.00 | 0.00 |
| ATOM | 1468 | CD   | PRO | 93 | -0.006 | -4.119 | -10.323 | 1.00 | 0.00 |
| ATOM | 1469 | HD2  | PRO | 93 | -0.467 | -3.389 | -10.988 | 1.00 | 0.00 |
| ATOM | 1470 | HD3  | PRO | 93 | 0.086  | -3.693 | -9.324  | 1.00 | 0.00 |
| ATOM | 1471 | CG   | PRO | 93 | -0.737 | -5.444 | -10.320 | 1.00 | 0.00 |
| ATOM | 1472 | HG2  | PRO | 93 | -1.577 | -5.393 | -11.013 | 1.00 | 0.00 |
| ATOM | 1473 | HG3  | PRO | 93 | -1.108 | -5.648 | -9.316  | 1.00 | 0.00 |
| ATOM | 1474 | CB   | PRO | 93 | 0.281  | -6.502 | -10.752 | 1.00 | 0.00 |
| ATOM | 1475 | HB2  | PRO | 93 | -0.130 | -7.177 | -11.503 | 1.00 | 0.00 |
| ATOM | 1476 | HB3  | PRO | 93 | 0.619  | -7.079 | -9.892  | 1.00 | 0.00 |
| ATOM | 1477 | CA   | PRO | 93 | 1.450  | -5.716 | -11.345 | 1.00 | 0.00 |
| ATOM | 1478 | HA   | PRO | 93 | 2.367  | -6.156 | -10.952 | 1.00 | 0.00 |
| ATOM | 1479 | C    | PRO | 93 | 1.485  | -5.746 | -12.863 | 1.00 | 0.00 |
| ATOM | 1480 | O    | PRO | 93 | 1.608  | -6.813 | -13.460 | 1.00 | 0.00 |

|      |      |      |     |    |        |        |         |      |      |
|------|------|------|-----|----|--------|--------|---------|------|------|
| ATOM | 1481 | N    | ASN | 94 | 1.378  | -4.563 | -13.473 | 1.00 | 0.00 |
| ATOM | 1482 | H    | ASN | 94 | 1.275  | -3.724 | -12.920 | 1.00 | 0.00 |
| ATOM | 1483 | CA   | ASN | 94 | 1.409  | -4.437 | -14.900 | 1.00 | 0.00 |
| ATOM | 1484 | HA   | ASN | 94 | 0.972  | -5.322 | -15.363 | 1.00 | 0.00 |
| ATOM | 1485 | CB   | ASN | 94 | 0.604  | -3.211 | -15.334 | 1.00 | 0.00 |
| ATOM | 1486 | HB2  | ASN | 94 | 0.834  | -2.376 | -14.673 | 1.00 | 0.00 |
| ATOM | 1487 | HB3  | ASN | 94 | 0.884  | -2.953 | -16.355 | 1.00 | 0.00 |
| ATOM | 1488 | CG   | ASN | 94 | -0.885 | -3.466 | -15.291 | 1.00 | 0.00 |
| ATOM | 1489 | OD1  | ASN | 94 | -1.361 | -4.586 | -15.224 | 1.00 | 0.00 |
| ATOM | 1490 | ND2  | ASN | 94 | -1.642 | -2.384 | -15.323 | 1.00 | 0.00 |
| ATOM | 1491 | HD21 | ASN | 94 | -2.648 | -2.474 | -15.298 | 1.00 | 0.00 |
| ATOM | 1492 | HD22 | ASN | 94 | -1.212 | -1.472 | -15.373 | 1.00 | 0.00 |
| ATOM | 1493 | C    | ASN | 94 | 2.838  | -4.274 | -15.376 | 1.00 | 0.00 |
| ATOM | 1494 | O    | ASN | 94 | 3.225  | -4.817 | -16.403 | 1.00 | 0.00 |
| ATOM | 1495 | N    | VAL | 95 | 3.620  | -3.501 | -14.620 | 1.00 | 0.00 |
| ATOM | 1496 | H    | VAL | 95 | 3.224  | -3.022 | -13.824 | 1.00 | 0.00 |
| ATOM | 1497 | CA   | VAL | 95 | 5.013  | -3.261 | -14.943 | 1.00 | 0.00 |
| ATOM | 1498 | HA   | VAL | 95 | 5.274  | -3.626 | -15.937 | 1.00 | 0.00 |
| ATOM | 1499 | CB   | VAL | 95 | 5.302  | -1.760 | -14.881 | 1.00 | 0.00 |
| ATOM | 1500 | HB   | VAL | 95 | 5.167  | -1.420 | -13.854 | 1.00 | 0.00 |
| ATOM | 1501 | CG1  | VAL | 95 | 6.729  | -1.458 | -15.334 | 1.00 | 0.00 |
| ATOM | 1502 | HG11 | VAL | 95 | 6.864  | -1.798 | -16.361 | 1.00 | 0.00 |

|      |      |      |     |    |       |        |         |      |      |
|------|------|------|-----|----|-------|--------|---------|------|------|
| ATOM | 1503 | HG12 | VAL | 95 | 6.908 | -0.385 | -15.280 | 1.00 | 0.00 |
| ATOM | 1504 | HG13 | VAL | 95 | 7.434 | -1.977 | -14.685 | 1.00 | 0.00 |
| ATOM | 1505 | CG2  | VAL | 95 | 4.300 | -0.982 | -15.746 | 1.00 | 0.00 |
| ATOM | 1506 | HG21 | VAL | 95 | 3.288 | -1.163 | -15.382 | 1.00 | 0.00 |
| ATOM | 1507 | HG22 | VAL | 95 | 4.521 | 0.083  | -15.690 | 1.00 | 0.00 |
| ATOM | 1508 | HG23 | VAL | 95 | 4.378 | -1.315 | -16.781 | 1.00 | 0.00 |
| ATOM | 1509 | C    | VAL | 95 | 5.910 | -4.052 | -14.003 | 1.00 | 0.00 |
| ATOM | 1510 | O    | VAL | 95 | 7.117 | -4.118 | -14.185 | 1.00 | 0.00 |
| ATOM | 1511 | N    | CYX | 96 | 5.305 | -4.711 | -13.019 | 1.00 | 0.00 |
| ATOM | 1512 | H    | CYX | 96 | 4.308 | -4.599 | -12.907 | 1.00 | 0.00 |
| ATOM | 1513 | CA   | CYX | 96 | 6.014 | -5.503 | -12.054 | 1.00 | 0.00 |
| ATOM | 1514 | HA   | CYX | 96 | 7.053 | -5.599 | -12.369 | 1.00 | 0.00 |
| ATOM | 1515 | CB   | CYX | 96 | 5.982 | -4.878 | -10.659 | 1.00 | 0.00 |
| ATOM | 1516 | HB2  | CYX | 96 | 4.979 | -4.970 | -10.242 | 1.00 | 0.00 |
| ATOM | 1517 | HB3  | CYX | 96 | 6.692 | -5.394 | -10.013 | 1.00 | 0.00 |
| ATOM | 1518 | SG   | CYX | 96 | 6.403 | -3.143 | -10.624 | 1.00 | 0.00 |
| ATOM | 1519 | C    | CYX | 96 | 5.434 | -6.879 | -12.074 | 1.00 | 0.00 |
| ATOM | 1520 | O    | CYX | 96 | 5.308 | -7.413 | -10.998 | 1.00 | 0.00 |
| ATOM | 1521 | N    | ASN | 97 | 5.057 | -7.402 | -13.252 | 1.00 | 0.00 |
| ATOM | 1522 | H    | ASN | 97 | 5.186 | -6.836 | -14.078 | 1.00 | 0.00 |
| ATOM | 1523 | CA   | ASN | 97 | 4.480 | -8.720 | -13.407 | 1.00 | 0.00 |
| ATOM | 1524 | HA   | ASN | 97 | 3.393 | -8.645 | -13.432 | 1.00 | 0.00 |

|      |      |      |     |    |       |         |         |      |      |
|------|------|------|-----|----|-------|---------|---------|------|------|
| ATOM | 1525 | CB   | ASN | 97 | 4.954 | -9.368  | -14.708 | 1.00 | 0.00 |
| ATOM | 1526 | HB2  | ASN | 97 | 5.936 | -8.987  | -14.988 | 1.00 | 0.00 |
| ATOM | 1527 | HB3  | ASN | 97 | 5.016 | -10.444 | -14.543 | 1.00 | 0.00 |
| ATOM | 1528 | CG   | ASN | 97 | 3.998 | -9.110  | -15.840 | 1.00 | 0.00 |
| ATOM | 1529 | OD1  | ASN | 97 | 3.267 | -9.980  | -16.283 | 1.00 | 0.00 |
| ATOM | 1530 | ND2  | ASN | 97 | 3.988 | -7.874  | -16.289 | 1.00 | 0.00 |
| ATOM | 1531 | HD21 | ASN | 97 | 3.372 | -7.621  | -17.049 | 1.00 | 0.00 |
| ATOM | 1532 | HD22 | ASN | 97 | 4.596 | -7.184  | -15.872 | 1.00 | 0.00 |
| ATOM | 1533 | C    | ASN | 97 | 4.876 | -9.639  | -12.253 | 1.00 | 0.00 |
| ATOM | 1534 | O    | ASN | 97 | 5.979 | -10.186 | -12.247 | 1.00 | 0.00 |
| ATOM | 1535 | N    | MET | 98 | 4.007 | -9.718  | -11.248 | 1.00 | 0.00 |
| ATOM | 1536 | H    | MET | 98 | 3.132 | -9.216  | -11.300 | 1.00 | 0.00 |
| ATOM | 1537 | CA   | MET | 98 | 4.307 | -10.448 | -10.037 | 1.00 | 0.00 |
| ATOM | 1538 | HA   | MET | 98 | 5.155 | -11.109 | -10.219 | 1.00 | 0.00 |
| ATOM | 1539 | CB   | MET | 98 | 4.656 | -9.513  | -8.881  | 1.00 | 0.00 |
| ATOM | 1540 | HB2  | MET | 98 | 4.995 | -10.113 | -8.036  | 1.00 | 0.00 |
| ATOM | 1541 | HB3  | MET | 98 | 5.458 | -8.847  | -9.199  | 1.00 | 0.00 |
| ATOM | 1542 | CG   | MET | 98 | 3.445 | -8.686  | -8.463  | 1.00 | 0.00 |
| ATOM | 1543 | HG2  | MET | 98 | 2.581 | -9.035  | -9.028  | 1.00 | 0.00 |
| ATOM | 1544 | HG3  | MET | 98 | 3.271 | -8.847  | -7.399  | 1.00 | 0.00 |
| ATOM | 1545 | SD   | MET | 98 | 3.678 | -6.941  | -8.763  | 1.00 | 0.00 |
| ATOM | 1546 | CE   | MET | 98 | 2.345 | -6.246  | -7.829  | 1.00 | 0.00 |

|      |      |     |     |    |        |         |         |      |      |
|------|------|-----|-----|----|--------|---------|---------|------|------|
| ATOM | 1547 | HE1 | MET | 98 | 2.453  | -6.523  | -6.780  | 1.00 | 0.00 |
| ATOM | 1548 | HE2 | MET | 98 | 2.363  | -5.160  | -7.922  | 1.00 | 0.00 |
| ATOM | 1549 | HE3 | MET | 98 | 1.397  | -6.627  | -8.209  | 1.00 | 0.00 |
| ATOM | 1550 | C   | MET | 98 | 3.132  | -11.329 | -9.694  | 1.00 | 0.00 |
| ATOM | 1551 | O   | MET | 98 | 3.061  | -11.897 | -8.614  | 1.00 | 0.00 |
| ATOM | 1552 | N   | LYS | 99 | 2.148  | -11.409 | -10.598 | 1.00 | 0.00 |
| ATOM | 1553 | H   | LYS | 99 | 2.195  | -10.800 | -11.403 | 1.00 | 0.00 |
| ATOM | 1554 | CA  | LYS | 99 | 0.959  | -12.193 | -10.406 | 1.00 | 0.00 |
| ATOM | 1555 | HA  | LYS | 99 | 1.159  | -13.019 | -9.723  | 1.00 | 0.00 |
| ATOM | 1556 | CB  | LYS | 99 | -0.149 | -11.316 | -9.804  | 1.00 | 0.00 |
| ATOM | 1557 | HB2 | LYS | 99 | -0.079 | -11.367 | -8.718  | 1.00 | 0.00 |
| ATOM | 1558 | HB3 | LYS | 99 | 0.008  | -10.288 | -10.130 | 1.00 | 0.00 |
| ATOM | 1559 | CG  | LYS | 99 | -1.541 | -11.787 | -10.249 | 1.00 | 0.00 |
| ATOM | 1560 | HG2 | LYS | 99 | -1.476 | -12.821 | -10.589 | 1.00 | 0.00 |
| ATOM | 1561 | HG3 | LYS | 99 | -2.225 | -11.726 | -9.403  | 1.00 | 0.00 |
| ATOM | 1562 | CD  | LYS | 99 | -2.064 | -10.900 | -11.398 | 1.00 | 0.00 |
| ATOM | 1563 | HD2 | LYS | 99 | -2.781 | -10.188 | -10.990 | 1.00 | 0.00 |
| ATOM | 1564 | HD3 | LYS | 99 | -1.223 | -10.360 | -11.832 | 1.00 | 0.00 |
| ATOM | 1565 | CE  | LYS | 99 | -2.747 | -11.749 | -12.489 | 1.00 | 0.00 |
| ATOM | 1566 | HE2 | LYS | 99 | -2.584 | -12.803 | -12.262 | 1.00 | 0.00 |
| ATOM | 1567 | HE3 | LYS | 99 | -3.816 | -11.536 | -12.477 | 1.00 | 0.00 |
| ATOM | 1568 | NZ  | LYS | 99 | -2.199 | -11.443 | -13.828 | 1.00 | 0.00 |

|      |      |      |     |     |        |         |         |      |      |
|------|------|------|-----|-----|--------|---------|---------|------|------|
| ATOM | 1569 | HZ1  | LYS | 99  | -1.209 | -11.641 | -13.840 | 1.00 | 0.00 |
| ATOM | 1570 | HZ2  | LYS | 99  | -2.664 | -12.013 | -14.520 | 1.00 | 0.00 |
| ATOM | 1571 | HZ3  | LYS | 99  | -2.350 | -10.467 | -14.039 | 1.00 | 0.00 |
| ATOM | 1572 | C    | LYS | 99  | 0.623  | -12.884 | -11.708 | 1.00 | 0.00 |
| ATOM | 1573 | O    | LYS | 99  | -0.066 | -12.351 | -12.554 | 1.00 | 0.00 |
| ATOM | 1574 | N    | GLN | 100 | 1.128  | -14.076 | -11.917 | 1.00 | 0.00 |
| ATOM | 1575 | H    | GLN | 100 | 1.771  | -14.481 | -11.252 | 1.00 | 0.00 |
| ATOM | 1576 | CA   | GLN | 100 | 0.832  | -14.817 | -13.121 | 1.00 | 0.00 |
| ATOM | 1577 | HA   | GLN | 100 | 0.900  | -14.164 | -13.991 | 1.00 | 0.00 |
| ATOM | 1578 | CB   | GLN | 100 | 1.840  | -15.960 | -13.286 | 1.00 | 0.00 |
| ATOM | 1579 | HB2  | GLN | 100 | 2.749  | -15.717 | -12.736 | 1.00 | 0.00 |
| ATOM | 1580 | HB3  | GLN | 100 | 1.408  | -16.878 | -12.886 | 1.00 | 0.00 |
| ATOM | 1581 | CG   | GLN | 100 | 2.178  | -16.158 | -14.768 | 1.00 | 0.00 |
| ATOM | 1582 | HG2  | GLN | 100 | 2.311  | -15.166 | -15.199 | 1.00 | 0.00 |
| ATOM | 1583 | HG3  | GLN | 100 | 3.100  | -16.729 | -14.879 | 1.00 | 0.00 |
| ATOM | 1584 | CD   | GLN | 100 | 1.068  | -16.874 | -15.528 | 1.00 | 0.00 |
| ATOM | 1585 | OE1  | GLN | 100 | 0.008  | -17.183 | -15.022 | 1.00 | 0.00 |
| ATOM | 1586 | NE2  | GLN | 100 | 1.332  | -17.192 | -16.773 | 1.00 | 0.00 |
| ATOM | 1587 | HE21 | GLN | 100 | 0.635  | -17.668 | -17.328 | 1.00 | 0.00 |
| ATOM | 1588 | HE22 | GLN | 100 | 2.231  | -16.960 | -17.171 | 1.00 | 0.00 |
| ATOM | 1589 | C    | GLN | 100 | -0.592 | -15.348 | -13.083 | 1.00 | 0.00 |
| ATOM | 1590 | O    | GLN | 100 | -1.353 | -15.137 | -14.020 | 1.00 | 0.00 |

|      |      |      |     |     |        |         |         |      |      |
|------|------|------|-----|-----|--------|---------|---------|------|------|
| ATOM | 1591 | N    | ILE | 101 | -0.943 | -15.991 | -11.969 | 1.00 | 0.00 |
| ATOM | 1592 | H    | ILE | 101 | -0.245 | -16.180 | -11.264 | 1.00 | 0.00 |
| ATOM | 1593 | CA   | ILE | 101 | -2.260 | -16.541 | -11.789 | 1.00 | 0.00 |
| ATOM | 1594 | HA   | ILE | 101 | -2.569 | -17.154 | -12.636 | 1.00 | 0.00 |
| ATOM | 1595 | CB   | ILE | 101 | -2.338 | -17.375 | -10.497 | 1.00 | 0.00 |
| ATOM | 1596 | HB   | ILE | 101 | -1.912 | -18.360 | -10.687 | 1.00 | 0.00 |
| ATOM | 1597 | CG2  | ILE | 101 | -1.569 | -16.698 | -9.373  | 1.00 | 0.00 |
| ATOM | 1598 | HG21 | ILE | 101 | -1.995 | -15.713 | -9.183  | 1.00 | 0.00 |
| ATOM | 1599 | HG22 | ILE | 101 | -1.637 | -17.304 | -8.470  | 1.00 | 0.00 |
| ATOM | 1600 | HG23 | ILE | 101 | -0.523 | -16.592 | -9.661  | 1.00 | 0.00 |
| ATOM | 1601 | CG1  | ILE | 101 | -3.793 | -17.650 | -10.083 | 1.00 | 0.00 |
| ATOM | 1602 | HG12 | ILE | 101 | -3.812 | -18.510 | -9.413  | 1.00 | 0.00 |
| ATOM | 1603 | HG13 | ILE | 101 | -4.182 | -16.776 | -9.562  | 1.00 | 0.00 |
| ATOM | 1604 | CD1  | ILE | 101 | -4.662 | -17.941 | -11.313 | 1.00 | 0.00 |
| ATOM | 1605 | HD11 | ILE | 101 | -4.273 | -18.816 | -11.834 | 1.00 | 0.00 |
| ATOM | 1606 | HD12 | ILE | 101 | -5.687 | -18.133 | -10.997 | 1.00 | 0.00 |
| ATOM | 1607 | HD13 | ILE | 101 | -4.644 | -17.082 | -11.983 | 1.00 | 0.00 |
| ATOM | 1608 | C    | ILE | 101 | -3.291 | -15.410 | -11.852 | 1.00 | 0.00 |
| ATOM | 1609 | O    | ILE | 101 | -3.815 | -15.076 | -12.909 | 1.00 | 0.00 |
| ATOM | 1610 | N    | GLY | 102 | -3.590 | -14.795 | -10.703 | 1.00 | 0.00 |
| ATOM | 1611 | H    | GLY | 102 | -3.097 | -15.061 | -9.862  | 1.00 | 0.00 |
| ATOM | 1612 | CA   | GLY | 102 | -4.588 | -13.766 | -10.611 | 1.00 | 0.00 |



|      |      |      |     |     |        |         |         |      |      |
|------|------|------|-----|-----|--------|---------|---------|------|------|
| ATOM | 1613 | HA2  | GLY | 102 | -4.121 | -12.804 | -10.822 | 1.00 | 0.00 |
| ATOM | 1614 | HA3  | GLY | 102 | -5.364 | -13.963 | -11.351 | 1.00 | 0.00 |
| ATOM | 1615 | C    | GLY | 102 | -5.216 | -13.716 | -9.245  | 1.00 | 0.00 |
| ATOM | 1616 | O    | GLY | 102 | -6.314 | -14.182 | -9.010  | 1.00 | 0.00 |
| ATOM | 1617 | N    | THR | 103 | -4.503 | -13.124 | -8.307  | 1.00 | 0.00 |
| ATOM | 1618 | H    | THR | 103 | -3.587 | -12.777 | -8.552  | 1.00 | 0.00 |
| ATOM | 1619 | CA   | THR | 103 | -4.936 | -13.013 | -6.919  | 1.00 | 0.00 |
| ATOM | 1620 | HA   | THR | 103 | -5.494 | -13.925 | -6.705  | 1.00 | 0.00 |
| ATOM | 1621 | CB   | THR | 103 | -3.696 | -12.976 | -6.022  | 1.00 | 0.00 |
| ATOM | 1622 | HB   | THR | 103 | -3.712 | -12.047 | -5.453  | 1.00 | 0.00 |
| ATOM | 1623 | CG2  | THR | 103 | -3.659 | -14.161 | -5.060  | 1.00 | 0.00 |
| ATOM | 1624 | HG21 | THR | 103 | -3.643 | -15.091 | -5.629  | 1.00 | 0.00 |
| ATOM | 1625 | HG22 | THR | 103 | -2.764 | -14.099 | -4.441  | 1.00 | 0.00 |
| ATOM | 1626 | HG23 | THR | 103 | -4.543 | -14.141 | -4.423  | 1.00 | 0.00 |
| ATOM | 1627 | OG1  | THR | 103 | -2.544 | -13.153 | -6.846  | 1.00 | 0.00 |
| ATOM | 1628 | HG1  | THR | 103 | -1.754 | -13.133 | -6.301  | 1.00 | 0.00 |
| ATOM | 1629 | C    | THR | 103 | -5.815 | -11.789 | -6.753  | 1.00 | 0.00 |
| ATOM | 1630 | O    | THR | 103 | -6.933 | -11.886 | -6.249  | 1.00 | 0.00 |
| ATOM | 1631 | N    | CYX | 104 | -5.327 | -10.630 | -7.216  | 1.00 | 0.00 |
| ATOM | 1632 | H    | CYX | 104 | -4.368 | -10.593 | -7.531  | 1.00 | 0.00 |
| ATOM | 1633 | CA   | CYX | 104 | -6.089 | -9.397  | -7.187  | 1.00 | 0.00 |
| ATOM | 1634 | HA   | CYX | 104 | -7.128 | -9.609  | -6.935  | 1.00 | 0.00 |

|      |      |     |     |     |        |         |         |      |      |
|------|------|-----|-----|-----|--------|---------|---------|------|------|
| ATOM | 1635 | CB  | CYX | 104 | -5.515 | -8.442  | -6.136  | 1.00 | 0.00 |
| ATOM | 1636 | HB2 | CYX | 104 | -6.238 | -7.654  | -5.927  | 1.00 | 0.00 |
| ATOM | 1637 | HB3 | CYX | 104 | -5.305 | -8.994  | -5.220  | 1.00 | 0.00 |
| ATOM | 1638 | SG  | CYX | 104 | -3.940 | -7.595  | -6.552  | 1.00 | 0.00 |
| ATOM | 1639 | C   | CYX | 104 | -6.125 | -8.795  | -8.584  | 1.00 | 0.00 |
| ATOM | 1640 | O   | CYX | 104 | -5.514 | -7.768  | -8.853  | 1.00 | 0.00 |
| ATOM | 1641 | N   | PRO | 105 | -6.791 | -9.472  | -9.521  | 1.00 | 0.00 |
| ATOM | 1642 | CD  | PRO | 105 | -7.524 | -10.712 | -9.324  | 1.00 | 0.00 |
| ATOM | 1643 | HD2 | PRO | 105 | -8.375 | -10.497 | -8.677  | 1.00 | 0.00 |
| ATOM | 1644 | HD3 | PRO | 105 | -6.859 | -11.418 | -8.826  | 1.00 | 0.00 |
| ATOM | 1645 | CG  | PRO | 105 | -7.948 | -11.191 | -10.710 | 1.00 | 0.00 |
| ATOM | 1646 | HG2 | PRO | 105 | -9.037 | -11.207 | -10.764 | 1.00 | 0.00 |
| ATOM | 1647 | HG3 | PRO | 105 | -7.563 | -12.198 | -10.873 | 1.00 | 0.00 |
| ATOM | 1648 | CB  | PRO | 105 | -7.352 | -10.208 | -11.720 | 1.00 | 0.00 |
| ATOM | 1649 | HB2 | PRO | 105 | -8.077 | -9.898  | -12.472 | 1.00 | 0.00 |
| ATOM | 1650 | HB3 | PRO | 105 | -6.486 | -10.650 | -12.212 | 1.00 | 0.00 |
| ATOM | 1651 | CA  | PRO | 105 | -6.920 | -9.003  | -10.887 | 1.00 | 0.00 |
| ATOM | 1652 | HA  | PRO | 105 | -5.928 | -8.723  | -11.242 | 1.00 | 0.00 |
| ATOM | 1653 | C   | PRO | 105 | -7.857 | -7.810  | -11.006 | 1.00 | 0.00 |
| ATOM | 1654 | O   | PRO | 105 | -8.805 | -7.813  | -11.781 | 1.00 | 0.00 |
| ATOM | 1655 | N   | PHE | 106 | -7.608 | -6.785  | -10.201 | 1.00 | 0.00 |
| ATOM | 1656 | H   | PHE | 106 | -6.808 | -6.834  | -9.587  | 1.00 | 0.00 |

|      |      |     |     |     |        |        |         |      |      |
|------|------|-----|-----|-----|--------|--------|---------|------|------|
| ATOM | 1657 | CA  | PHE | 106 | -8.414 | -5.598 | -10.175 | 1.00 | 0.00 |
| ATOM | 1658 | HA  | PHE | 106 | -9.450 | -5.821 | -10.431 | 1.00 | 0.00 |
| ATOM | 1659 | CB  | PHE | 106 | -8.372 | -5.039 | -8.757  | 1.00 | 0.00 |
| ATOM | 1660 | HB2 | PHE | 106 | -9.304 | -4.536 | -8.500  | 1.00 | 0.00 |
| ATOM | 1661 | HB3 | PHE | 106 | -8.204 | -5.866 | -8.067  | 1.00 | 0.00 |
| ATOM | 1662 | CG  | PHE | 106 | -7.257 | -4.038 | -8.515  | 1.00 | 0.00 |
| ATOM | 1663 | CD1 | PHE | 106 | -5.933 | -4.471 | -8.352  | 1.00 | 0.00 |
| ATOM | 1664 | HD1 | PHE | 106 | -5.711 | -5.538 | -8.397  | 1.00 | 0.00 |
| ATOM | 1665 | CE1 | PHE | 106 | -4.904 | -3.552 | -8.134  | 1.00 | 0.00 |
| ATOM | 1666 | HE1 | PHE | 106 | -3.872 | -3.890 | -8.035  | 1.00 | 0.00 |
| ATOM | 1667 | CZ  | PHE | 106 | -5.205 | -2.194 | -8.044  | 1.00 | 0.00 |
| ATOM | 1668 | HZ  | PHE | 106 | -4.418 | -1.479 | -7.806  | 1.00 | 0.00 |
| ATOM | 1669 | CE2 | PHE | 106 | -6.514 | -1.748 | -8.258  | 1.00 | 0.00 |
| ATOM | 1670 | HE2 | PHE | 106 | -6.733 | -0.681 | -8.241  | 1.00 | 0.00 |
| ATOM | 1671 | CD2 | PHE | 106 | -7.538 | -2.666 | -8.493  | 1.00 | 0.00 |
| ATOM | 1672 | HD2 | PHE | 106 | -8.557 | -2.316 | -8.660  | 1.00 | 0.00 |
| ATOM | 1673 | C   | PHE | 106 | -7.878 | -4.565 | -11.119 | 1.00 | 0.00 |
| ATOM | 1674 | O   | PHE | 106 | -6.681 | -4.598 | -11.395 | 1.00 | 0.00 |
| ATOM | 1675 | N   | ILE | 107 | -8.739 | -3.640 | -11.546 | 1.00 | 0.00 |
| ATOM | 1676 | H   | ILE | 107 | -9.699 | -3.691 | -11.237 | 1.00 | 0.00 |
| ATOM | 1677 | CA  | ILE | 107 | -8.375 | -2.601 | -12.492 | 1.00 | 0.00 |
| ATOM | 1678 | HA  | ILE | 107 | -7.767 | -1.823 | -12.031 | 1.00 | 0.00 |

|      |      |      |     |     |         |        |         |      |      |
|------|------|------|-----|-----|---------|--------|---------|------|------|
| ATOM | 1679 | CB   | ILE | 107 | -7.630  | -3.178 | -13.716 | 1.00 | 0.00 |
| ATOM | 1680 | HB   | ILE | 107 | -7.944  | -2.637 | -14.609 | 1.00 | 0.00 |
| ATOM | 1681 | CG2  | ILE | 107 | -6.110  | -3.036 | -13.539 | 1.00 | 0.00 |
| ATOM | 1682 | HG21 | ILE | 107 | -5.796  | -3.578 | -12.647 | 1.00 | 0.00 |
| ATOM | 1683 | HG22 | ILE | 107 | -5.602  | -3.448 | -14.411 | 1.00 | 0.00 |
| ATOM | 1684 | HG23 | ILE | 107 | -5.853  | -1.982 | -13.434 | 1.00 | 0.00 |
| ATOM | 1685 | CG1  | ILE | 107 | -8.030  | -4.645 | -13.991 | 1.00 | 0.00 |
| ATOM | 1686 | HG12 | ILE | 107 | -7.319  | -5.299 | -13.485 | 1.00 | 0.00 |
| ATOM | 1687 | HG13 | ILE | 107 | -9.028  | -4.813 | -13.587 | 1.00 | 0.00 |
| ATOM | 1688 | CD1  | ILE | 107 | -8.028  | -4.949 | -15.469 | 1.00 | 0.00 |
| ATOM | 1689 | HD11 | ILE | 107 | -7.030  | -4.782 | -15.874 | 1.00 | 0.00 |
| ATOM | 1690 | HD12 | ILE | 107 | -8.314  | -5.989 | -15.627 | 1.00 | 0.00 |
| ATOM | 1691 | HD13 | ILE | 107 | -8.739  | -4.297 | -15.976 | 1.00 | 0.00 |
| ATOM | 1692 | C    | ILE | 107 | -9.607  | -1.840 | -12.930 | 1.00 | 0.00 |
| ATOM | 1693 | O    | ILE | 107 | -9.524  | -0.627 | -13.065 | 1.00 | 0.00 |
| ATOM | 1694 | N    | ALA | 108 | -10.722 | -2.549 | -13.142 | 1.00 | 0.00 |
| ATOM | 1695 | H    | ALA | 108 | -10.676 | -3.557 | -13.091 | 1.00 | 0.00 |
| ATOM | 1696 | CA   | ALA | 108 | -11.977 | -1.939 | -13.517 | 1.00 | 0.00 |
| ATOM | 1697 | HA   | ALA | 108 | -11.816 | -1.220 | -14.320 | 1.00 | 0.00 |
| ATOM | 1698 | CB   | ALA | 108 | -12.932 | -3.022 | -14.016 | 1.00 | 0.00 |
| ATOM | 1699 | HB1  | ALA | 108 | -13.111 | -3.745 | -13.220 | 1.00 | 0.00 |
| ATOM | 1700 | HB2  | ALA | 108 | -13.877 | -2.566 | -14.311 | 1.00 | 0.00 |

|      |      |      |     |     |         |        |         |      |      |
|------|------|------|-----|-----|---------|--------|---------|------|------|
| ATOM | 1701 | HB3  | ALA | 108 | -12.491 | -3.529 | -14.874 | 1.00 | 0.00 |
| ATOM | 1702 | C    | ALA | 108 | -12.560 | -1.157 | -12.341 | 1.00 | 0.00 |
| ATOM | 1703 | O    | ALA | 108 | -13.599 | -1.516 | -11.800 | 1.00 | 0.00 |
| ATOM | 1704 | N    | ILE | 109 | -11.871 | -0.103 | -11.933 | 1.00 | 0.00 |
| ATOM | 1705 | H    | ILE | 109 | -10.985 | 0.065  | -12.387 | 1.00 | 0.00 |
| ATOM | 1706 | CA   | ILE | 109 | -12.233 | 0.728  | -10.808 | 1.00 | 0.00 |
| ATOM | 1707 | HA   | ILE | 109 | -13.280 | 0.607  | -10.528 | 1.00 | 0.00 |
| ATOM | 1708 | CB   | ILE | 109 | -11.340 | 0.444  | -9.588  | 1.00 | 0.00 |
| ATOM | 1709 | HB   | ILE | 109 | -11.206 | 1.367  | -9.025  | 1.00 | 0.00 |
| ATOM | 1710 | CG2  | ILE | 109 | -11.984 | -0.618 | -8.683  | 1.00 | 0.00 |
| ATOM | 1711 | HG21 | ILE | 109 | -12.118 | -1.542 | -9.245  | 1.00 | 0.00 |
| ATOM | 1712 | HG22 | ILE | 109 | -11.338 | -0.806 | -7.826  | 1.00 | 0.00 |
| ATOM | 1713 | HG23 | ILE | 109 | -12.953 | -0.261 | -8.336  | 1.00 | 0.00 |
| ATOM | 1714 | CG1  | ILE | 109 | -9.915  | 0.034  | -9.987  | 1.00 | 0.00 |
| ATOM | 1715 | HG12 | ILE | 109 | -9.382  | -0.300 | -9.097  | 1.00 | 0.00 |
| ATOM | 1716 | HG13 | ILE | 109 | -9.972  | -0.785 | -10.704 | 1.00 | 0.00 |
| ATOM | 1717 | CD1  | ILE | 109 | -9.171  | 1.206  | -10.614 | 1.00 | 0.00 |
| ATOM | 1718 | HD11 | ILE | 109 | -9.113  | 2.025  | -9.898  | 1.00 | 0.00 |
| ATOM | 1719 | HD12 | ILE | 109 | -8.164  | 0.892  | -10.889 | 1.00 | 0.00 |
| ATOM | 1720 | HD13 | ILE | 109 | -9.703  | 1.540  | -11.505 | 1.00 | 0.00 |
| ATOM | 1721 | C    | ILE | 109 | -12.237 | 2.203  | -11.239 | 1.00 | 0.00 |
| ATOM | 1722 | O    | ILE | 109 | -13.264 | 2.863  | -11.053 | 1.00 | 0.00 |

ATOM 1723 OXT ILE 109 -11.224 2.698 -11.767 1.00 0.00

TER

ATOM 1724 CI1 LIG 110 20.727 -12.783 -6.849 1.00 0.00

ATOM 1725 CI2 LIG 110 21.737 -15.481 -7.475 1.00 0.00

ATOM 1726 P1 LIG 110 19.590 -16.829 -3.628 1.00 0.00

ATOM 1727 O1 LIG 110 19.110 -18.296 -4.030 1.00 0.00

ATOM 1728 O2 LIG 110 20.906 -17.121 -2.794 1.00 0.00

ATOM 1729 O3 LIG 110 20.119 -16.279 -5.088 1.00 0.00

ATOM 1730 O4 LIG 110 18.637 -15.916 -2.981 1.00 0.00

ATOM 1731 C1 LIG 110 17.916 -18.510 -4.816 1.00 0.00

ATOM 1732 H1 LIG 110 17.753 -19.586 -4.823 1.00 0.00

ATOM 1733 H2 LIG 110 18.070 -18.149 -5.834 1.00 0.00

ATOM 1734 H3 LIG 110 17.065 -18.006 -4.356 1.00 0.00

ATOM 1735 C2 LIG 110 21.967 -17.992 -3.250 1.00 0.00

ATOM 1736 H4 LIG 110 22.348 -17.651 -4.214 1.00 0.00

ATOM 1737 H5 LIG 110 21.600 -19.015 -3.327 1.00 0.00

ATOM 1738 H6 LIG 110 22.747 -17.925 -2.495 1.00 0.00

ATOM 1739 C3 LIG 110 20.106 -14.941 -5.390 1.00 0.00

ATOM 1740 H7 LIG 110 19.510 -14.300 -4.752 1.00 0.00

ATOM 1741 C4 LIG 110 20.779 -14.473 -6.438 1.00 0.00

TER

ATOM 1742 CI1 LIG 111 18.772 -13.594 20.693 1.00 0.00

|      |      |     |     |     |        |         |        |      |      |
|------|------|-----|-----|-----|--------|---------|--------|------|------|
| ATOM | 1743 | Cl2 | LIG | 111 | 15.946 | -13.070 | 20.038 | 1.00 | 0.00 |
| ATOM | 1744 | P1  | LIG | 111 | 17.215 | -13.520 | 15.633 | 1.00 | 0.00 |
| ATOM | 1745 | O1  | LIG | 111 | 15.918 | -14.198 | 14.997 | 1.00 | 0.00 |
| ATOM | 1746 | O2  | LIG | 111 | 17.023 | -11.995 | 15.246 | 1.00 | 0.00 |
| ATOM | 1747 | O3  | LIG | 111 | 16.840 | -13.608 | 17.235 | 1.00 | 0.00 |
| ATOM | 1748 | O4  | LIG | 111 | 18.539 | -14.075 | 15.321 | 1.00 | 0.00 |
| ATOM | 1749 | C1  | LIG | 111 | 15.677 | -15.619 | 15.111 | 1.00 | 0.00 |
| ATOM | 1750 | H1  | LIG | 111 | 14.814 | -15.826 | 14.482 | 1.00 | 0.00 |
| ATOM | 1751 | H2  | LIG | 111 | 15.453 | -15.877 | 16.148 | 1.00 | 0.00 |
| ATOM | 1752 | H3  | LIG | 111 | 16.542 | -16.179 | 14.755 | 1.00 | 0.00 |
| ATOM | 1753 | C2  | LIG | 111 | 15.796 | -11.260 | 15.467 | 1.00 | 0.00 |
| ATOM | 1754 | H4  | LIG | 111 | 15.522 | -11.291 | 16.522 | 1.00 | 0.00 |
| ATOM | 1755 | H5  | LIG | 111 | 14.997 | -11.679 | 14.854 | 1.00 | 0.00 |
| ATOM | 1756 | H6  | LIG | 111 | 16.008 | -10.238 | 15.164 | 1.00 | 0.00 |
| ATOM | 1757 | C3  | LIG | 111 | 17.822 | -13.674 | 18.190 | 1.00 | 0.00 |
| ATOM | 1758 | H7  | LIG | 111 | 18.820 | -13.922 | 17.853 | 1.00 | 0.00 |
| ATOM | 1759 | C4  | LIG | 111 | 17.537 | -13.466 | 19.474 | 1.00 | 0.00 |
| TER  |      |     |     |     |        |         |        |      |      |
| ATOM | 1760 | Cl1 | LIG | 112 | -4.189 | -4.328  | 17.766 | 1.00 | 0.00 |
| ATOM | 1761 | Cl2 | LIG | 112 | -2.350 | -6.630  | 17.850 | 1.00 | 0.00 |
| ATOM | 1762 | P1  | LIG | 112 | -5.854 | -9.084  | 16.142 | 1.00 | 0.00 |
| ATOM | 1763 | O1  | LIG | 112 | -5.086 | -10.123 | 15.205 | 1.00 | 0.00 |

|      |      |     |     |     |        |         |        |      |      |
|------|------|-----|-----|-----|--------|---------|--------|------|------|
| ATOM | 1764 | O2  | LIG | 112 | -6.115 | -9.939  | 17.451 | 1.00 | 0.00 |
| ATOM | 1765 | O3  | LIG | 112 | -4.618 | -8.067  | 16.531 | 1.00 | 0.00 |
| ATOM | 1766 | O4  | LIG | 112 | -7.032 | -8.382  | 15.615 | 1.00 | 0.00 |
| ATOM | 1767 | C1  | LIG | 112 | -4.645 | -9.760  | 13.877 | 1.00 | 0.00 |
| ATOM | 1768 | H1  | LIG | 112 | -4.285 | -10.679 | 13.421 | 1.00 | 0.00 |
| ATOM | 1769 | H2  | LIG | 112 | -3.835 | -9.031  | 13.940 | 1.00 | 0.00 |
| ATOM | 1770 | H3  | LIG | 112 | -5.478 | -9.357  | 13.300 | 1.00 | 0.00 |
| ATOM | 1771 | C2  | LIG | 112 | -5.091 | -10.706 | 18.125 | 1.00 | 0.00 |
| ATOM | 1772 | H4  | LIG | 112 | -4.257 | -10.060 | 18.405 | 1.00 | 0.00 |
| ATOM | 1773 | H5  | LIG | 112 | -4.745 | -11.513 | 17.478 | 1.00 | 0.00 |
| ATOM | 1774 | H6  | LIG | 112 | -5.566 | -11.112 | 19.015 | 1.00 | 0.00 |
| ATOM | 1775 | C3  | LIG | 112 | -4.852 | -6.752  | 16.839 | 1.00 | 0.00 |
| ATOM | 1776 | H7  | LIG | 112 | -5.822 | -6.350  | 16.572 | 1.00 | 0.00 |
| ATOM | 1777 | C4  | LIG | 112 | -3.910 | -6.009  | 17.415 | 1.00 | 0.00 |
| TER  |      |     |     |     |        |         |        |      |      |
| ATOM | 1778 | Cl1 | LIG | 113 | 21.716 | 23.789  | -1.963 | 1.00 | 0.00 |
| ATOM | 1779 | Cl2 | LIG | 113 | 20.936 | 23.210  | 0.820  | 1.00 | 0.00 |
| ATOM | 1780 | P1  | LIG | 113 | 16.602 | 23.170  | -0.741 | 1.00 | 0.00 |
| ATOM | 1781 | O1  | LIG | 113 | 15.944 | 22.045  | 0.179  | 1.00 | 0.00 |
| ATOM | 1782 | O2  | LIG | 113 | 16.150 | 24.505  | -0.016 | 1.00 | 0.00 |
| ATOM | 1783 | O3  | LIG | 113 | 18.191 | 22.984  | -0.347 | 1.00 | 0.00 |
| ATOM | 1784 | O4  | LIG | 113 | 16.361 | 23.140  | -2.190 | 1.00 | 0.00 |



|      |      |     |     |     |        |        |         |      |      |
|------|------|-----|-----|-----|--------|--------|---------|------|------|
| ATOM | 1785 | C1  | LIG | 113 | 16.103 | 20.639 | -0.118  | 1.00 | 0.00 |
| ATOM | 1786 | H1  | LIG | 113 | 15.450 | 20.112 | 0.574   | 1.00 | 0.00 |
| ATOM | 1787 | H2  | LIG | 113 | 17.140 | 20.339 | 0.045   | 1.00 | 0.00 |
| ATOM | 1788 | H3  | LIG | 113 | 15.802 | 20.434 | -1.146  | 1.00 | 0.00 |
| ATOM | 1789 | C2  | LIG | 113 | 16.296 | 24.735 | 1.404   | 1.00 | 0.00 |
| ATOM | 1790 | H4  | LIG | 113 | 17.341 | 24.627 | 1.700   | 1.00 | 0.00 |
| ATOM | 1791 | H5  | LIG | 113 | 15.670 | 24.036 | 1.960   | 1.00 | 0.00 |
| ATOM | 1792 | H6  | LIG | 113 | 15.963 | 25.757 | 1.572   | 1.00 | 0.00 |
| ATOM | 1793 | C3  | LIG | 113 | 19.184 | 23.307 | -1.235  | 1.00 | 0.00 |
| ATOM | 1794 | H7  | LIG | 113 | 18.895 | 23.442 | -2.269  | 1.00 | 0.00 |
| ATOM | 1795 | C4  | LIG | 113 | 20.448 | 23.422 | -0.831  | 1.00 | 0.00 |
| TER  |      |     |     |     |        |        |         |      |      |
| ATOM | 1796 | Cl1 | LIG | 114 | 19.549 | 13.893 | -15.675 | 1.00 | 0.00 |
| ATOM | 1797 | Cl2 | LIG | 114 | 19.922 | 13.966 | -18.598 | 1.00 | 0.00 |
| ATOM | 1798 | P1  | LIG | 114 | 16.879 | 10.512 | -18.752 | 1.00 | 0.00 |
| ATOM | 1799 | O1  | LIG | 114 | 16.113 | 10.824 | -20.116 | 1.00 | 0.00 |
| ATOM | 1800 | O2  | LIG | 114 | 17.913 | 9.395  | -19.194 | 1.00 | 0.00 |
| ATOM | 1801 | O3  | LIG | 114 | 17.772 | 11.887 | -18.591 | 1.00 | 0.00 |
| ATOM | 1802 | O4  | LIG | 114 | 16.097 | 10.190 | -17.550 | 1.00 | 0.00 |
| ATOM | 1803 | C1  | LIG | 114 | 15.055 | 11.808 | -20.180 | 1.00 | 0.00 |
| ATOM | 1804 | H1  | LIG | 114 | 14.625 | 11.719 | -21.175 | 1.00 | 0.00 |
| ATOM | 1805 | H2  | LIG | 114 | 15.468 | 12.808 | -20.040 | 1.00 | 0.00 |

|      |      |     |     |     |         |        |         |      |      |
|------|------|-----|-----|-----|---------|--------|---------|------|------|
| ATOM | 1806 | H3  | LIG | 114 | 14.298  | 11.598 | -19.424 | 1.00 | 0.00 |
| ATOM | 1807 | C2  | LIG | 114 | 18.776  | 9.514  | -20.349 | 1.00 | 0.00 |
| ATOM | 1808 | H4  | LIG | 114 | 19.390  | 10.413 | -20.272 | 1.00 | 0.00 |
| ATOM | 1809 | H5  | LIG | 114 | 18.176  | 9.540  | -21.259 | 1.00 | 0.00 |
| ATOM | 1810 | H6  | LIG | 114 | 19.406  | 8.628  | -20.337 | 1.00 | 0.00 |
| ATOM | 1811 | C3  | LIG | 114 | 18.155  | 12.343 | -17.357 | 1.00 | 0.00 |
| ATOM | 1812 | H7  | LIG | 114 | 17.645  | 11.925 | -16.498 | 1.00 | 0.00 |
| ATOM | 1813 | C4  | LIG | 114 | 19.094  | 13.279 | -17.238 | 1.00 | 0.00 |
| TER  |      |     |     |     |         |        |         |      |      |
| ATOM | 1814 | Cl1 | LIG | 115 | -16.545 | 18.034 | 8.585   | 1.00 | 0.00 |
| ATOM | 1815 | Cl2 | LIG | 115 | -18.625 | 19.760 | 9.760   | 1.00 | 0.00 |
| ATOM | 1816 | P1  | LIG | 115 | -21.594 | 16.441 | 8.583   | 1.00 | 0.00 |
| ATOM | 1817 | O1  | LIG | 115 | -22.645 | 16.516 | 9.780   | 1.00 | 0.00 |
| ATOM | 1818 | O2  | LIG | 115 | -22.323 | 17.263 | 7.441   | 1.00 | 0.00 |
| ATOM | 1819 | O3  | LIG | 115 | -20.420 | 17.445 | 9.155   | 1.00 | 0.00 |
| ATOM | 1820 | O4  | LIG | 115 | -21.076 | 15.130 | 8.167   | 1.00 | 0.00 |
| ATOM | 1821 | C1  | LIG | 115 | -22.385 | 15.883 | 11.054  | 1.00 | 0.00 |
| ATOM | 1822 | H1  | LIG | 115 | -23.307 | 15.972 | 11.624  | 1.00 | 0.00 |
| ATOM | 1823 | H2  | LIG | 115 | -21.576 | 16.402 | 11.570  | 1.00 | 0.00 |
| ATOM | 1824 | H3  | LIG | 115 | -22.134 | 14.832 | 10.909  | 1.00 | 0.00 |
| ATOM | 1825 | C2  | LIG | 115 | -22.904 | 18.573 | 7.643   | 1.00 | 0.00 |
| ATOM | 1826 | H4  | LIG | 115 | -22.150 | 19.268 | 8.016   | 1.00 | 0.00 |

|      |      |     |     |     |         |        |        |      |      |
|------|------|-----|-----|-----|---------|--------|--------|------|------|
| ATOM | 1827 | H5  | LIG | 115 | -23.737 | 18.505 | 8.344  | 1.00 | 0.00 |
| ATOM | 1828 | H6  | LIG | 115 | -23.257 | 18.891 | 6.665  | 1.00 | 0.00 |
| ATOM | 1829 | C3  | LIG | 115 | -19.110 | 17.289 | 8.783  | 1.00 | 0.00 |
| ATOM | 1830 | H7  | LIG | 115 | -18.839 | 16.349 | 8.318  | 1.00 | 0.00 |
| ATOM | 1831 | C4  | LIG | 115 | -18.217 | 18.249 | 9.015  | 1.00 | 0.00 |
| TER  |      |     |     |     |         |        |        |      |      |
| ATOM | 1832 | Cl1 | LIG | 116 | -17.227 | -3.718 | 17.615 | 1.00 | 0.00 |
| ATOM | 1833 | Cl2 | LIG | 116 | -18.189 | -1.641 | 15.758 | 1.00 | 0.00 |
| ATOM | 1834 | P1  | LIG | 116 | -22.418 | -2.762 | 17.197 | 1.00 | 0.00 |
| ATOM | 1835 | O1  | LIG | 116 | -23.153 | -1.347 | 17.154 | 1.00 | 0.00 |
| ATOM | 1836 | O2  | LIG | 116 | -22.888 | -3.428 | 15.837 | 1.00 | 0.00 |
| ATOM | 1837 | O3  | LIG | 116 | -20.860 | -2.296 | 16.932 | 1.00 | 0.00 |
| ATOM | 1838 | O4  | LIG | 116 | -22.570 | -3.612 | 18.386 | 1.00 | 0.00 |
| ATOM | 1839 | C1  | LIG | 116 | -23.004 | -0.387 | 18.225 | 1.00 | 0.00 |
| ATOM | 1840 | H1  | LIG | 116 | -23.708 | 0.413  | 18.008 | 1.00 | 0.00 |
| ATOM | 1841 | H2  | LIG | 116 | -21.985 | 0.005  | 18.234 | 1.00 | 0.00 |
| ATOM | 1842 | H3  | LIG | 116 | -23.245 | -0.849 | 19.183 | 1.00 | 0.00 |
| ATOM | 1843 | C2  | LIG | 116 | -22.825 | -2.761 | 14.555 | 1.00 | 0.00 |
| ATOM | 1844 | H4  | LIG | 116 | -21.803 | -2.444 | 14.343 | 1.00 | 0.00 |
| ATOM | 1845 | H5  | LIG | 116 | -23.498 | -1.902 | 14.550 | 1.00 | 0.00 |
| ATOM | 1846 | H6  | LIG | 116 | -23.148 | -3.499 | 13.824 | 1.00 | 0.00 |
| ATOM | 1847 | C3  | LIG | 116 | -19.809 | -3.031 | 17.413 | 1.00 | 0.00 |

|      |      |     |     |     |         |         |         |      |      |
|------|------|-----|-----|-----|---------|---------|---------|------|------|
| ATOM | 1848 | H7  | LIG | 116 | -20.031 | -3.769  | 18.174  | 1.00 | 0.00 |
| ATOM | 1849 | C4  | LIG | 116 | -18.570 | -2.817  | 16.973  | 1.00 | 0.00 |
| TER  |      |     |     |     |         |         |         |      |      |
| ATOM | 1850 | Cl1 | LIG | 117 | -17.659 | -19.072 | -17.285 | 1.00 | 0.00 |
| ATOM | 1851 | Cl2 | LIG | 117 | -17.437 | -20.884 | -14.971 | 1.00 | 0.00 |
| ATOM | 1852 | P1  | LIG | 117 | -14.337 | -23.190 | -17.480 | 1.00 | 0.00 |
| ATOM | 1853 | O1  | LIG | 117 | -13.320 | -23.682 | -16.353 | 1.00 | 0.00 |
| ATOM | 1854 | O2  | LIG | 117 | -15.232 | -24.477 | -17.712 | 1.00 | 0.00 |
| ATOM | 1855 | O3  | LIG | 117 | -15.279 | -22.163 | -16.601 | 1.00 | 0.00 |
| ATOM | 1856 | O4  | LIG | 117 | -13.806 | -22.577 | -18.705 | 1.00 | 0.00 |
| ATOM | 1857 | C1  | LIG | 117 | -12.297 | -22.807 | -15.826 | 1.00 | 0.00 |
| ATOM | 1858 | H1  | LIG | 117 | -11.672 | -23.429 | -15.188 | 1.00 | 0.00 |
| ATOM | 1859 | H2  | LIG | 117 | -12.755 | -22.011 | -15.237 | 1.00 | 0.00 |
| ATOM | 1860 | H3  | LIG | 117 | -11.702 | -22.388 | -16.639 | 1.00 | 0.00 |
| ATOM | 1861 | C2  | LIG | 117 | -15.847 | -25.230 | -16.640 | 1.00 | 0.00 |
| ATOM | 1862 | H4  | LIG | 117 | -16.486 | -24.581 | -16.041 | 1.00 | 0.00 |
| ATOM | 1863 | H5  | LIG | 117 | -15.077 | -25.685 | -16.017 | 1.00 | 0.00 |
| ATOM | 1864 | H6  | LIG | 117 | -16.444 | -25.998 | -17.126 | 1.00 | 0.00 |
| ATOM | 1865 | C3  | LIG | 117 | -15.915 | -21.103 | -17.192 | 1.00 | 0.00 |
| ATOM | 1866 | H7  | LIG | 117 | -15.578 | -20.817 | -18.181 | 1.00 | 0.00 |
| ATOM | 1867 | C4  | LIG | 117 | -16.882 | -20.447 | -16.555 | 1.00 | 0.00 |
| TER  |      |     |     |     |         |         |         |      |      |

|      |      |     |     |     |        |        |        |      |      |
|------|------|-----|-----|-----|--------|--------|--------|------|------|
| ATOM | 1868 | CI1 | LIG | 118 | 20.074 | -3.003 | -1.149 | 1.00 | 0.00 |
| ATOM | 1869 | CI2 | LIG | 118 | 22.024 | -4.270 | -2.959 | 1.00 | 0.00 |
| ATOM | 1870 | P1  | LIG | 118 | 20.480 | -1.338 | -6.158 | 1.00 | 0.00 |
| ATOM | 1871 | O1  | LIG | 118 | 21.810 | -1.044 | -6.988 | 1.00 | 0.00 |
| ATOM | 1872 | O2  | LIG | 118 | 19.758 | -2.429 | -7.053 | 1.00 | 0.00 |
| ATOM | 1873 | O3  | LIG | 118 | 21.104 | -2.172 | -4.882 | 1.00 | 0.00 |
| ATOM | 1874 | O4  | LIG | 118 | 19.628 | -0.212 | -5.749 | 1.00 | 0.00 |
| ATOM | 1875 | C1  | LIG | 118 | 22.790 | -0.085 | -6.528 | 1.00 | 0.00 |
| ATOM | 1876 | H1  | LIG | 118 | 23.510 | 0.017  | -7.337 | 1.00 | 0.00 |
| ATOM | 1877 | H2  | LIG | 118 | 23.285 | -0.459 | -5.631 | 1.00 | 0.00 |
| ATOM | 1878 | H3  | LIG | 118 | 22.313 | 0.876  | -6.329 | 1.00 | 0.00 |
| ATOM | 1879 | C2  | LIG | 118 | 20.417 | -3.612 | -7.562 | 1.00 | 0.00 |
| ATOM | 1880 | H4  | LIG | 118 | 20.837 | -4.194 | -6.740 | 1.00 | 0.00 |
| ATOM | 1881 | H5  | LIG | 118 | 21.201 | -3.326 | -8.265 | 1.00 | 0.00 |
| ATOM | 1882 | H6  | LIG | 118 | 19.644 | -4.183 | -8.070 | 1.00 | 0.00 |
| ATOM | 1883 | C3  | LIG | 118 | 20.486 | -2.162 | -3.658 | 1.00 | 0.00 |
| ATOM | 1884 | H7  | LIG | 118 | 19.735 | -1.400 | -3.492 | 1.00 | 0.00 |
| ATOM | 1885 | C4  | LIG | 118 | 20.824 | -3.042 | -2.718 | 1.00 | 0.00 |
| TER  |      |     |     |     |        |        |        |      |      |
| ATOM | 1886 | CI1 | LIG | 119 | -4.692 | 15.153 | 10.549 | 1.00 | 0.00 |
| ATOM | 1887 | CI2 | LIG | 119 | -5.886 | 17.384 | 12.061 | 1.00 | 0.00 |
| ATOM | 1888 | P1  | LIG | 119 | -3.555 | 15.756 | 15.685 | 1.00 | 0.00 |

|      |      |    |     |     |        |        |        |      |      |
|------|------|----|-----|-----|--------|--------|--------|------|------|
| ATOM | 1889 | O1 | LIG | 119 | -3.184 | 17.103 | 16.454 | 1.00 | 0.00 |
| ATOM | 1890 | O2 | LIG | 119 | -4.824 | 15.248 | 16.488 | 1.00 | 0.00 |
| ATOM | 1891 | O3 | LIG | 119 | -4.153 | 16.372 | 14.279 | 1.00 | 0.00 |
| ATOM | 1892 | O4 | LIG | 119 | -2.512 | 14.743 | 15.472 | 1.00 | 0.00 |
| ATOM | 1893 | C1 | LIG | 119 | -2.059 | 17.918 | 16.050 | 1.00 | 0.00 |
| ATOM | 1894 | H1 | LIG | 119 | -1.955 | 18.683 | 16.816 | 1.00 | 0.00 |
| ATOM | 1895 | H2 | LIG | 119 | -2.264 | 18.381 | 15.084 | 1.00 | 0.00 |
| ATOM | 1896 | H3 | LIG | 119 | -1.153 | 17.312 | 16.000 | 1.00 | 0.00 |
| ATOM | 1897 | C2 | LIG | 119 | -5.959 | 16.086 | 16.806 | 1.00 | 0.00 |
| ATOM | 1898 | H4 | LIG | 119 | -6.387 | 16.506 | 15.894 | 1.00 | 0.00 |
| ATOM | 1899 | H5 | LIG | 119 | -5.654 | 16.883 | 17.484 | 1.00 | 0.00 |
| ATOM | 1900 | H6 | LIG | 119 | -6.680 | 15.432 | 17.290 | 1.00 | 0.00 |
| ATOM | 1901 | C3 | LIG | 119 | -4.088 | 15.661 | 13.109 | 1.00 | 0.00 |
| ATOM | 1902 | H7 | LIG | 119 | -3.417 | 14.811 | 13.086 | 1.00 | 0.00 |
| ATOM | 1903 | C4 | LIG | 119 | -4.806 | 16.027 | 12.049 | 1.00 | 0.00 |
| TER  |      |    |     |     |        |        |        |      |      |
| END  |      |    |     |     |        |        |        |      |      |

**Table J:** The number of atoms present in the system of BN-Nap

|      |   |    |     |   |         |        |       |      |      |
|------|---|----|-----|---|---------|--------|-------|------|------|
| ATOM | 1 | N  | GLN | 1 | -10.822 | -8.568 | 3.550 | 1.00 | 0.00 |
| ATOM | 2 | H1 | GLN | 1 | -9.891  | -8.899 | 3.759 | 1.00 | 0.00 |
| ATOM | 3 | H2 | GLN | 1 | -11.053 | -7.822 | 4.190 | 1.00 | 0.00 |

|      |    |      |     |   |         |         |       |      |      |
|------|----|------|-----|---|---------|---------|-------|------|------|
| ATOM | 4  | H3   | GLN | 1 | -10.899 | -8.421  | 2.554 | 1.00 | 0.00 |
| ATOM | 5  | CA   | GLN | 1 | -11.767 | -9.646  | 3.856 | 1.00 | 0.00 |
| ATOM | 6  | HA   | GLN | 1 | -12.469 | -9.308  | 4.618 | 1.00 | 0.00 |
| ATOM | 7  | CB   | GLN | 1 | -12.560 | -10.062 | 2.609 | 1.00 | 0.00 |
| ATOM | 8  | HB2  | GLN | 1 | -12.263 | -9.428  | 1.774 | 1.00 | 0.00 |
| ATOM | 9  | HB3  | GLN | 1 | -12.330 | -11.102 | 2.375 | 1.00 | 0.00 |
| ATOM | 10 | CG   | GLN | 1 | -14.060 | -9.915  | 2.850 | 1.00 | 0.00 |
| ATOM | 11 | HG2  | GLN | 1 | -14.675 | -10.722 | 2.451 | 1.00 | 0.00 |
| ATOM | 12 | HG3  | GLN | 1 | -14.136 | -9.904  | 3.937 | 1.00 | 0.00 |
| ATOM | 13 | CD   | GLN | 1 | -14.585 | -8.594  | 2.313 | 1.00 | 0.00 |
| ATOM | 14 | OE1  | GLN | 1 | -14.943 | -7.693  | 3.053 | 1.00 | 0.00 |
| ATOM | 15 | NE2  | GLN | 1 | -14.481 | -8.434  | 1.007 | 1.00 | 0.00 |
| ATOM | 16 | HE21 | GLN | 1 | -14.809 | -7.581  | 0.578 | 1.00 | 0.00 |
| ATOM | 17 | HE22 | GLN | 1 | -14.074 | -9.166  | 0.442 | 1.00 | 0.00 |
| ATOM | 18 | C    | GLN | 1 | -11.035 | -10.849 | 4.440 | 1.00 | 0.00 |
| ATOM | 19 | O    | GLN | 1 | -11.387 | -11.329 | 5.508 | 1.00 | 0.00 |
| ATOM | 20 | N    | PRO | 2 | -9.977  | -11.300 | 3.744 | 1.00 | 0.00 |
| ATOM | 21 | CD   | PRO | 2 | -9.481  | -10.776 | 2.473 | 1.00 | 0.00 |
| ATOM | 22 | HD2  | PRO | 2 | -9.076  | -9.782  | 2.663 | 1.00 | 0.00 |
| ATOM | 23 | HD3  | PRO | 2 | -10.331 | -10.698 | 1.796 | 1.00 | 0.00 |
| ATOM | 24 | CG   | PRO | 2 | -8.427  | -11.749 | 1.970 | 1.00 | 0.00 |
| ATOM | 25 | HG2  | PRO | 2 | -7.462  | -11.244 | 1.929 | 1.00 | 0.00 |

|      |    |          |   |         |         |        |      |      |
|------|----|----------|---|---------|---------|--------|------|------|
| ATOM | 26 | HG3 PRO  | 2 | -8.701  | -12.090 | 0.971  | 1.00 | 0.00 |
| ATOM | 27 | CB PRO   | 2 | -8.404  | -12.915 | 2.957  | 1.00 | 0.00 |
| ATOM | 28 | HB2 PRO  | 2 | -7.384  | -13.176 | 3.240  | 1.00 | 0.00 |
| ATOM | 29 | HB3 PRO  | 2 | -8.898  | -13.790 | 2.535  | 1.00 | 0.00 |
| ATOM | 30 | CA PRO   | 2 | -9.173  | -12.422 | 4.181  | 1.00 | 0.00 |
| ATOM | 31 | HA PRO   | 2 | -9.843  | -13.228 | 4.480  | 1.00 | 0.00 |
| ATOM | 32 | C PRO    | 2 | -8.283  | -12.056 | 5.337  | 1.00 | 0.00 |
| ATOM | 33 | O PRO    | 2 | -7.294  | -11.375 | 5.125  | 1.00 | 0.00 |
| ATOM | 34 | N GLN    | 3 | -8.629  | -12.519 | 6.542  | 1.00 | 0.00 |
| ATOM | 35 | H GLN    | 3 | -9.452  | -13.097 | 6.637  | 1.00 | 0.00 |
| ATOM | 36 | CA GLN   | 3 | -7.861  | -12.217 | 7.731  | 1.00 | 0.00 |
| ATOM | 37 | HA GLN   | 3 | -7.787  | -11.137 | 7.854  | 1.00 | 0.00 |
| ATOM | 38 | CB GLN   | 3 | -8.527  | -12.805 | 8.974  | 1.00 | 0.00 |
| ATOM | 39 | HB2 GLN  | 3 | -9.578  | -12.994 | 8.755  | 1.00 | 0.00 |
| ATOM | 40 | HB3 GLN  | 3 | -8.035  | -13.745 | 9.226  | 1.00 | 0.00 |
| ATOM | 41 | CG GLN   | 3 | -8.418  | -11.836 | 10.159 | 1.00 | 0.00 |
| ATOM | 42 | HG2 GLN  | 3 | -7.972  | -12.380 | 10.992 | 1.00 | 0.00 |
| ATOM | 43 | HG3 GLN  | 3 | -7.788  | -10.984 | 9.903  | 1.00 | 0.00 |
| ATOM | 44 | CD GLN   | 3 | -9.775  | -11.323 | 10.588 | 1.00 | 0.00 |
| ATOM | 45 | OE1 GLN  | 3 | -10.395 | -11.837 | 11.498 | 1.00 | 0.00 |
| ATOM | 46 | NE2 GLN  | 3 | -10.241 | -10.311 | 9.878  | 1.00 | 0.00 |
| ATOM | 47 | HE21 GLN | 3 | -11.141 | -9.913  | 10.103 | 1.00 | 0.00 |



|      |    |      |     |   |        |         |       |      |      |
|------|----|------|-----|---|--------|---------|-------|------|------|
| ATOM | 48 | HE22 | GLN | 3 | -9.695 | -9.941  | 9.113 | 1.00 | 0.00 |
| ATOM | 49 | C    | GLN | 3 | -6.479 | -12.794 | 7.607 | 1.00 | 0.00 |
| ATOM | 50 | O    | GLN | 3 | -5.538 | -12.217 | 8.079 | 1.00 | 0.00 |
| ATOM | 51 | N    | LYS | 4 | -6.313 | -13.908 | 6.902 | 1.00 | 0.00 |
| ATOM | 52 | H    | LYS | 4 | -7.129 | -14.390 | 6.553 | 1.00 | 0.00 |
| ATOM | 53 | CA   | LYS | 4 | -5.009 | -14.515 | 6.686 | 1.00 | 0.00 |
| ATOM | 54 | HA   | LYS | 4 | -4.658 | -14.994 | 7.600 | 1.00 | 0.00 |
| ATOM | 55 | CB   | LYS | 4 | -5.116 | -15.577 | 5.588 | 1.00 | 0.00 |
| ATOM | 56 | HB2  | LYS | 4 | -4.284 | -16.273 | 5.699 | 1.00 | 0.00 |
| ATOM | 57 | HB3  | LYS | 4 | -6.056 | -16.113 | 5.717 | 1.00 | 0.00 |
| ATOM | 58 | CG   | LYS | 4 | -5.074 | -14.948 | 4.186 | 1.00 | 0.00 |
| ATOM | 59 | HG2  | LYS | 4 | -5.283 | -13.882 | 4.274 | 1.00 | 0.00 |
| ATOM | 60 | HG3  | LYS | 4 | -4.077 | -15.090 | 3.768 | 1.00 | 0.00 |
| ATOM | 61 | CD   | LYS | 4 | -6.108 | -15.595 | 3.266 | 1.00 | 0.00 |
| ATOM | 62 | HD2  | LYS | 4 | -7.071 | -15.617 | 3.777 | 1.00 | 0.00 |
| ATOM | 63 | HD3  | LYS | 4 | -6.193 | -15.000 | 2.357 | 1.00 | 0.00 |
| ATOM | 64 | CE   | LYS | 4 | -5.692 | -17.020 | 2.904 | 1.00 | 0.00 |
| ATOM | 65 | HE2  | LYS | 4 | -5.491 | -17.073 | 1.834 | 1.00 | 0.00 |
| ATOM | 66 | HE3  | LYS | 4 | -4.789 | -17.280 | 3.456 | 1.00 | 0.00 |
| ATOM | 67 | NZ   | LYS | 4 | -6.768 | -17.967 | 3.249 | 1.00 | 0.00 |
| ATOM | 68 | HZ1  | LYS | 4 | -7.605 | -17.727 | 2.737 | 1.00 | 0.00 |
| ATOM | 69 | HZ2  | LYS | 4 | -6.482 | -18.905 | 3.005 | 1.00 | 0.00 |

|      |    |     |     |   |        |         |       |      |      |
|------|----|-----|-----|---|--------|---------|-------|------|------|
| ATOM | 70 | HZ3 | LYS | 4 | -6.954 | -17.919 | 4.240 | 1.00 | 0.00 |
| ATOM | 71 | C   | LYS | 4 | -3.955 | -13.443 | 6.357 | 1.00 | 0.00 |
| ATOM | 72 | O   | LYS | 4 | -2.812 | -13.607 | 6.721 | 1.00 | 0.00 |
| ATOM | 73 | N   | CYX | 5 | -4.399 | -12.344 | 5.721 | 1.00 | 0.00 |
| ATOM | 74 | H   | CYX | 5 | -5.359 | -12.311 | 5.409 | 1.00 | 0.00 |
| ATOM | 75 | CA  | CYX | 5 | -3.560 | -11.227 | 5.445 | 1.00 | 0.00 |
| ATOM | 76 | HA  | CYX | 5 | -2.543 | -11.423 | 5.784 | 1.00 | 0.00 |
| ATOM | 77 | CB  | CYX | 5 | -3.533 | -10.982 | 3.959 | 1.00 | 0.00 |
| ATOM | 78 | HB2 | CYX | 5 | -4.124 | -11.746 | 3.453 | 1.00 | 0.00 |
| ATOM | 79 | HB3 | CYX | 5 | -3.951 | -9.999  | 3.745 | 1.00 | 0.00 |
| ATOM | 80 | SG  | CYX | 5 | -1.867 | -11.060 | 3.233 | 1.00 | 0.00 |
| ATOM | 81 | C   | CYX | 5 | -4.072 | -10.021 | 6.163 | 1.00 | 0.00 |
| ATOM | 82 | O   | CYX | 5 | -3.316 | -9.264  | 6.689 | 1.00 | 0.00 |
| ATOM | 83 | N   | GLN | 6 | -5.382 | -9.830  | 6.286 | 1.00 | 0.00 |
| ATOM | 84 | H   | GLN | 6 | -5.996 | -10.468 | 5.799 | 1.00 | 0.00 |
| ATOM | 85 | CA  | GLN | 6 | -5.972 | -8.725  | 7.005 | 1.00 | 0.00 |
| ATOM | 86 | HA  | GLN | 6 | -5.561 | -7.785  | 6.637 | 1.00 | 0.00 |
| ATOM | 87 | CB  | GLN | 6 | -7.489 | -8.705  | 6.810 | 1.00 | 0.00 |
| ATOM | 88 | HB2 | GLN | 6 | -7.807 | -9.691  | 6.472 | 1.00 | 0.00 |
| ATOM | 89 | HB3 | GLN | 6 | -7.958 | -8.481  | 7.768 | 1.00 | 0.00 |
| ATOM | 90 | CG  | GLN | 6 | -7.905 | -7.658  | 5.784 | 1.00 | 0.00 |
| ATOM | 91 | HG2 | GLN | 6 | -6.991 | -7.153  | 5.471 | 1.00 | 0.00 |

|      |     |          |   |         |         |        |      |      |
|------|-----|----------|---|---------|---------|--------|------|------|
| ATOM | 92  | HG3 GLN  | 6 | -8.379  | -8.120  | 4.918  | 1.00 | 0.00 |
| ATOM | 93  | CD GLN   | 6 | -8.851  | -6.630  | 6.362  | 1.00 | 0.00 |
| ATOM | 94  | OE1 GLN  | 6 | -8.871  | -6.331  | 7.541  | 1.00 | 0.00 |
| ATOM | 95  | NE2 GLN  | 6 | -9.713  | -6.112  | 5.498  | 1.00 | 0.00 |
| ATOM | 96  | HE21 GLN | 6 | -10.378 | -5.418  | 5.807  | 1.00 | 0.00 |
| ATOM | 97  | HE22 GLN | 6 | -9.700  | -6.414  | 4.534  | 1.00 | 0.00 |
| ATOM | 98  | C GLN    | 6 | -5.620  | -8.764  | 8.482  | 1.00 | 0.00 |
| ATOM | 99  | O GLN    | 6 | -5.865  | -7.817  | 9.210  | 1.00 | 0.00 |
| ATOM | 100 | N ARG    | 7 | -5.054  | -9.872  | 8.942  | 1.00 | 0.00 |
| ATOM | 101 | H ARG    | 7 | -4.930  | -10.622 | 8.276  | 1.00 | 0.00 |
| ATOM | 102 | CA ARG   | 7 | -4.643  | -10.092 | 10.296 | 1.00 | 0.00 |
| ATOM | 103 | HA ARG   | 7 | -5.048  | -9.301  | 10.927 | 1.00 | 0.00 |
| ATOM | 104 | CB ARG   | 7 | -5.138  | -11.442 | 10.825 | 1.00 | 0.00 |
| ATOM | 105 | HB2 ARG  | 7 | -5.943  | -11.801 | 10.183 | 1.00 | 0.00 |
| ATOM | 106 | HB3 ARG  | 7 | -4.313  | -12.155 | 10.805 | 1.00 | 0.00 |
| ATOM | 107 | CG ARG   | 7 | -5.653  | -11.300 | 12.254 | 1.00 | 0.00 |
| ATOM | 108 | HG2 ARG  | 7 | -4.925  | -10.733 | 12.833 | 1.00 | 0.00 |
| ATOM | 109 | HG3 ARG  | 7 | -6.600  | -10.760 | 12.232 | 1.00 | 0.00 |
| ATOM | 110 | CD ARG   | 7 | -5.863  | -12.673 | 12.902 | 1.00 | 0.00 |
| ATOM | 111 | HD2 ARG  | 7 | -6.857  | -13.049 | 12.657 | 1.00 | 0.00 |
| ATOM | 112 | HD3 ARG  | 7 | -5.111  | -13.373 | 12.536 | 1.00 | 0.00 |
| ATOM | 113 | NE ARG   | 7 | -5.743  | -12.574 | 14.371 | 1.00 | 0.00 |

|      |     |      |     |   |        |         |        |      |      |
|------|-----|------|-----|---|--------|---------|--------|------|------|
| ATOM | 114 | HE   | ARG | 7 | -6.605 | -12.482 | 14.889 | 1.00 | 0.00 |
| ATOM | 115 | CZ   | ARG | 7 | -4.601 | -12.592 | 15.042 | 1.00 | 0.00 |
| ATOM | 116 | NH1  | ARG | 7 | -3.459 | -12.723 | 14.408 | 1.00 | 0.00 |
| ATOM | 117 | HH11 | ARG | 7 | -3.451 | -12.811 | 13.402 | 1.00 | 0.00 |
| ATOM | 118 | HH12 | ARG | 7 | -2.594 | -12.736 | 14.929 | 1.00 | 0.00 |
| ATOM | 119 | NH2  | ARG | 7 | -4.599 | -12.485 | 16.349 | 1.00 | 0.00 |
| ATOM | 120 | HH21 | ARG | 7 | -5.473 | -12.389 | 16.846 | 1.00 | 0.00 |
| ATOM | 121 | HH22 | ARG | 7 | -3.724 | -12.500 | 16.852 | 1.00 | 0.00 |
| ATOM | 122 | C    | ARG | 7 | -3.142 | -10.038 | 10.397 | 1.00 | 0.00 |
| ATOM | 123 | O    | ARG | 7 | -2.666 | -10.045 | 11.505 | 1.00 | 0.00 |
| ATOM | 124 | N    | GLU | 8 | -2.446 | -10.026 | 9.273  | 1.00 | 0.00 |
| ATOM | 125 | H    | GLU | 8 | -2.944 | -10.119 | 8.399  | 1.00 | 0.00 |
| ATOM | 126 | CA   | GLU | 8 | -1.001 | -9.949  | 9.234  | 1.00 | 0.00 |
| ATOM | 127 | HA   | GLU | 8 | -0.599 | -9.991  | 10.246 | 1.00 | 0.00 |
| ATOM | 128 | CB   | GLU | 8 | -0.432 | -11.121 | 8.434  | 1.00 | 0.00 |
| ATOM | 129 | HB2  | GLU | 8 | -1.255 | -11.665 | 7.969  | 1.00 | 0.00 |
| ATOM | 130 | HB3  | GLU | 8 | 0.230  | -10.733 | 7.660  | 1.00 | 0.00 |
| ATOM | 131 | CG   | GLU | 8 | 0.353  | -12.068 | 9.349  | 1.00 | 0.00 |
| ATOM | 132 | HG2  | GLU | 8 | 0.009  | -11.873 | 10.364 | 1.00 | 0.00 |
| ATOM | 133 | HG3  | GLU | 8 | 0.161  | -13.111 | 9.095  | 1.00 | 0.00 |
| ATOM | 134 | CD   | GLU | 8 | 1.857  | -11.789 | 9.257  | 1.00 | 0.00 |
| ATOM | 135 | OE1  | GLU | 8 | 2.416  | -12.053 | 8.173  | 1.00 | 0.00 |

|      |     |     |     |   |        |         |        |      |      |
|------|-----|-----|-----|---|--------|---------|--------|------|------|
| ATOM | 136 | OE2 | GLU | 8 | 2.413  | -11.373 | 10.292 | 1.00 | 0.00 |
| ATOM | 137 | C   | GLU | 8 | -0.525 | -8.628  | 8.647  | 1.00 | 0.00 |
| ATOM | 138 | O   | GLU | 8 | 0.543  | -8.143  | 8.963  | 1.00 | 0.00 |
| ATOM | 139 | N   | PHE | 9 | -1.384 | -7.972  | 7.879  | 1.00 | 0.00 |
| ATOM | 140 | H   | PHE | 9 | -2.298 | -8.382  | 7.747  | 1.00 | 0.00 |
| ATOM | 141 | CA  | PHE | 9 | -1.099 | -6.730  | 7.234  | 1.00 | 0.00 |
| ATOM | 142 | HA  | PHE | 9 | -0.061 | -6.697  | 6.904  | 1.00 | 0.00 |
| ATOM | 143 | CB  | PHE | 9 | -2.003 | -6.594  | 6.013  | 1.00 | 0.00 |
| ATOM | 144 | HB2 | PHE | 9 | -1.528 | -7.090  | 5.166  | 1.00 | 0.00 |
| ATOM | 145 | HB3 | PHE | 9 | -2.974 | -7.052  | 6.204  | 1.00 | 0.00 |
| ATOM | 146 | CG  | PHE | 9 | -2.274 | -5.167  | 5.584  | 1.00 | 0.00 |
| ATOM | 147 | CD1 | PHE | 9 | -3.097 | -4.328  | 6.354  | 1.00 | 0.00 |
| ATOM | 148 | HD1 | PHE | 9 | -3.569 | -4.730  | 7.250  | 1.00 | 0.00 |
| ATOM | 149 | CE1 | PHE | 9 | -3.314 | -3.002  | 5.988  | 1.00 | 0.00 |
| ATOM | 150 | HE1 | PHE | 9 | -3.913 | -2.349  | 6.622  | 1.00 | 0.00 |
| ATOM | 151 | CZ  | PHE | 9 | -2.763 | -2.512  | 4.807  | 1.00 | 0.00 |
| ATOM | 152 | HZ  | PHE | 9 | -2.937 | -1.481  | 4.498  | 1.00 | 0.00 |
| ATOM | 153 | CE2 | PHE | 9 | -1.981 | -3.355  | 4.015  | 1.00 | 0.00 |
| ATOM | 154 | HE2 | PHE | 9 | -1.569 | -2.971  | 3.082  | 1.00 | 0.00 |
| ATOM | 155 | CD2 | PHE | 9 | -1.724 | -4.673  | 4.402  | 1.00 | 0.00 |
| ATOM | 156 | HD2 | PHE | 9 | -1.096 | -5.311  | 3.780  | 1.00 | 0.00 |
| ATOM | 157 | C   | PHE | 9 | -1.367 | -5.617  | 8.204  | 1.00 | 0.00 |

|      |     |      |     |    |        |        |        |      |      |
|------|-----|------|-----|----|--------|--------|--------|------|------|
| ATOM | 158 | O    | PHE | 9  | -0.693 | -4.607 | 8.224  | 1.00 | 0.00 |
| ATOM | 159 | N    | GLN | 10 | -2.440 | -5.744 | 9.001  | 1.00 | 0.00 |
| ATOM | 160 | H    | GLN | 10 | -3.029 | -6.560 | 8.906  | 1.00 | 0.00 |
| ATOM | 161 | CA   | GLN | 10 | -2.828 | -4.726 | 9.948  | 1.00 | 0.00 |
| ATOM | 162 | HA   | GLN | 10 | -2.374 | -3.775 | 9.669  | 1.00 | 0.00 |
| ATOM | 163 | CB   | GLN | 10 | -4.351 | -4.554 | 9.971  | 1.00 | 0.00 |
| ATOM | 164 | HB2  | GLN | 10 | -4.647 | -3.956 | 9.110  | 1.00 | 0.00 |
| ATOM | 165 | HB3  | GLN | 10 | -4.814 | -5.539 | 9.905  | 1.00 | 0.00 |
| ATOM | 166 | CG   | GLN | 10 | -4.810 | -3.858 | 11.260 | 1.00 | 0.00 |
| ATOM | 167 | HG2  | GLN | 10 | -4.662 | -4.517 | 12.115 | 1.00 | 0.00 |
| ATOM | 168 | HG3  | GLN | 10 | -4.209 | -2.958 | 11.387 | 1.00 | 0.00 |
| ATOM | 169 | CD   | GLN | 10 | -6.261 | -3.463 | 11.202 | 1.00 | 0.00 |
| ATOM | 170 | OE1  | GLN | 10 | -6.630 | -2.466 | 10.602 | 1.00 | 0.00 |
| ATOM | 171 | NE2  | GLN | 10 | -7.100 | -4.278 | 11.815 | 1.00 | 0.00 |
| ATOM | 172 | HE21 | GLN | 10 | -8.089 | -4.073 | 11.815 | 1.00 | 0.00 |
| ATOM | 173 | HE22 | GLN | 10 | -6.749 | -5.103 | 12.281 | 1.00 | 0.00 |
| ATOM | 174 | C    | GLN | 10 | -2.285 | -5.097 | 11.322 | 1.00 | 0.00 |
| ATOM | 175 | O    | GLN | 10 | -2.302 | -4.289 | 12.249 | 1.00 | 0.00 |
| ATOM | 176 | N    | GLN | 11 | -1.816 | -6.329 | 11.480 | 1.00 | 0.00 |
| ATOM | 177 | H    | GLN | 11 | -1.860 | -6.981 | 10.709 | 1.00 | 0.00 |
| ATOM | 178 | CA   | GLN | 11 | -1.286 | -6.792 | 12.736 | 1.00 | 0.00 |
| ATOM | 179 | HA   | GLN | 11 | -2.091 | -6.892 | 13.464 | 1.00 | 0.00 |

|      |     |      |     |    |        |         |        |      |      |
|------|-----|------|-----|----|--------|---------|--------|------|------|
| ATOM | 180 | CB   | GLN | 11 | -0.617 | -8.150  | 12.560 | 1.00 | 0.00 |
| ATOM | 181 | HB2  | GLN | 11 | -0.945 | -8.587  | 11.616 | 1.00 | 0.00 |
| ATOM | 182 | HB3  | GLN | 11 | 0.464  | -8.012  | 12.540 | 1.00 | 0.00 |
| ATOM | 183 | CG   | GLN | 11 | -0.990 | -9.087  | 13.712 | 1.00 | 0.00 |
| ATOM | 184 | HG2  | GLN | 11 | -1.809 | -8.616  | 14.255 | 1.00 | 0.00 |
| ATOM | 185 | HG3  | GLN | 11 | -1.315 | -10.058 | 13.337 | 1.00 | 0.00 |
| ATOM | 186 | CD   | GLN | 11 | 0.166  | -9.299  | 14.668 | 1.00 | 0.00 |
| ATOM | 187 | OE1  | GLN | 11 | 1.320  | -9.338  | 14.300 | 1.00 | 0.00 |
| ATOM | 188 | NE2  | GLN | 11 | -0.174 | -9.491  | 15.932 | 1.00 | 0.00 |
| ATOM | 189 | HE21 | GLN | 11 | 0.543  | -9.640  | 16.628 | 1.00 | 0.00 |
| ATOM | 190 | HE22 | GLN | 11 | -1.149 | -9.489  | 16.195 | 1.00 | 0.00 |
| ATOM | 191 | C    | GLN | 11 | -0.298 | -5.791  | 13.304 | 1.00 | 0.00 |
| ATOM | 192 | O    | GLN | 11 | -0.497 | -5.276  | 14.400 | 1.00 | 0.00 |
| ATOM | 193 | N    | GLU | 12 | 0.692  | -5.422  | 12.490 | 1.00 | 0.00 |
| ATOM | 194 | H    | GLU | 12 | 0.762  | -5.835  | 11.571 | 1.00 | 0.00 |
| ATOM | 195 | CA   | GLU | 12 | 1.736  | -4.507  | 12.915 | 1.00 | 0.00 |
| ATOM | 196 | HA   | GLU | 12 | 1.289  | -3.535  | 13.124 | 1.00 | 0.00 |
| ATOM | 197 | CB   | GLU | 12 | 2.462  | -4.995  | 14.178 | 1.00 | 0.00 |
| ATOM | 198 | HB2  | GLU | 12 | 3.486  | -4.622  | 14.152 | 1.00 | 0.00 |
| ATOM | 199 | HB3  | GLU | 12 | 1.949  | -4.587  | 15.049 | 1.00 | 0.00 |
| ATOM | 200 | CG   | GLU | 12 | 2.478  | -6.524  | 14.266 | 1.00 | 0.00 |
| ATOM | 201 | HG2  | GLU | 12 | 1.579  | -6.890  | 14.762 | 1.00 | 0.00 |

|      |     |      |     |    |       |        |        |      |      |
|------|-----|------|-----|----|-------|--------|--------|------|------|
| ATOM | 202 | HG3  | GLU | 12 | 2.497 | -6.885 | 13.237 | 1.00 | 0.00 |
| ATOM | 203 | CD   | GLU | 12 | 3.704 | -7.032 | 15.002 | 1.00 | 0.00 |
| ATOM | 204 | OE1  | GLU | 12 | 4.754 | -7.171 | 14.334 | 1.00 | 0.00 |
| ATOM | 205 | OE2  | GLU | 12 | 3.593 | -7.223 | 16.237 | 1.00 | 0.00 |
| ATOM | 206 | C    | GLU | 12 | 2.722 | -4.267 | 11.780 | 1.00 | 0.00 |
| ATOM | 207 | O    | GLU | 12 | 3.907 | -4.031 | 11.986 | 1.00 | 0.00 |
| ATOM | 208 | N    | GLN | 13 | 2.213 | -4.284 | 10.549 | 1.00 | 0.00 |
| ATOM | 209 | H    | GLN | 13 | 1.236 | -4.505 | 10.417 | 1.00 | 0.00 |
| ATOM | 210 | CA   | GLN | 13 | 3.030 | -4.071 | 9.379  | 1.00 | 0.00 |
| ATOM | 211 | HA   | GLN | 13 | 3.774 | -3.302 | 9.585  | 1.00 | 0.00 |
| ATOM | 212 | CB   | GLN | 13 | 3.756 | -5.360 | 8.984  | 1.00 | 0.00 |
| ATOM | 213 | HB2  | GLN | 13 | 3.177 | -6.214 | 9.337  | 1.00 | 0.00 |
| ATOM | 214 | HB3  | GLN | 13 | 3.838 | -5.401 | 7.898  | 1.00 | 0.00 |
| ATOM | 215 | CG   | GLN | 13 | 5.152 | -5.402 | 9.601  | 1.00 | 0.00 |
| ATOM | 216 | HG2  | GLN | 13 | 5.636 | -4.426 | 9.592  | 1.00 | 0.00 |
| ATOM | 217 | HG3  | GLN | 13 | 5.022 | -5.733 | 10.631 | 1.00 | 0.00 |
| ATOM | 218 | CD   | GLN | 13 | 6.048 | -6.394 | 8.883  | 1.00 | 0.00 |
| ATOM | 219 | OE1  | GLN | 13 | 5.971 | -6.619 | 7.684  | 1.00 | 0.00 |
| ATOM | 220 | NE2  | GLN | 13 | 6.985 | -6.959 | 9.627  | 1.00 | 0.00 |
| ATOM | 221 | HE21 | GLN | 13 | 7.617 | -7.630 | 9.214  | 1.00 | 0.00 |
| ATOM | 222 | HE22 | GLN | 13 | 7.063 | -6.717 | 10.604 | 1.00 | 0.00 |
| ATOM | 223 | C    | GLN | 13 | 2.188 | -3.548 | 8.247  | 1.00 | 0.00 |



|      |     |     |     |    |        |        |        |      |      |
|------|-----|-----|-----|----|--------|--------|--------|------|------|
| ATOM | 224 | O   | GLN | 13 | 2.207  | -4.084 | 7.178  | 1.00 | 0.00 |
| ATOM | 225 | N   | HIE | 14 | 1.404  | -2.502 | 8.501  | 1.00 | 0.00 |
| ATOM | 226 | H   | HIE | 14 | 1.384  | -2.137 | 9.442  | 1.00 | 0.00 |
| ATOM | 227 | CA  | HIE | 14 | 0.509  | -1.923 | 7.521  | 1.00 | 0.00 |
| ATOM | 228 | HA  | HIE | 14 | -0.099 | -2.709 | 7.073  | 1.00 | 0.00 |
| ATOM | 229 | CB  | HIE | 14 | -0.421 | -0.894 | 8.170  | 1.00 | 0.00 |
| ATOM | 230 | HB2 | HIE | 14 | 0.041  | 0.093  | 8.175  | 1.00 | 0.00 |
| ATOM | 231 | HB3 | HIE | 14 | -1.342 | -0.861 | 7.587  | 1.00 | 0.00 |
| ATOM | 232 | CG  | HIE | 14 | -0.820 | -1.188 | 9.586  | 1.00 | 0.00 |
| ATOM | 233 | ND1 | HIE | 14 | -1.372 | -0.260 | 10.434 | 1.00 | 0.00 |
| ATOM | 234 | CE1 | HIE | 14 | -1.596 | -0.845 | 11.618 | 1.00 | 0.00 |
| ATOM | 235 | HE1 | HIE | 14 | -2.060 | -0.294 | 12.436 | 1.00 | 0.00 |
| ATOM | 236 | NE2 | HIE | 14 | -1.163 | -2.106 | 11.546 | 1.00 | 0.00 |
| ATOM | 237 | HE2 | HIE | 14 | -1.178 | -2.778 | 12.300 | 1.00 | 0.00 |
| ATOM | 238 | CD2 | HIE | 14 | -0.692 | -2.352 | 10.285 | 1.00 | 0.00 |
| ATOM | 239 | HD2 | HIE | 14 | -0.315 | -3.342 | 10.027 | 1.00 | 0.00 |
| ATOM | 240 | C   | HIE | 14 | 1.355  | -1.341 | 6.398  | 1.00 | 0.00 |
| ATOM | 241 | O   | HIE | 14 | 2.465  | -1.752 | 6.100  | 1.00 | 0.00 |
| ATOM | 242 | N   | LEU | 15 | 0.857  | -0.264 | 5.793  | 1.00 | 0.00 |
| ATOM | 243 | H   | LEU | 15 | -0.072 | 0.055  | 6.026  | 1.00 | 0.00 |
| ATOM | 244 | CA  | LEU | 15 | 1.560  | 0.401  | 4.720  | 1.00 | 0.00 |
| ATOM | 245 | HA  | LEU | 15 | 2.560  | -0.018 | 4.613  | 1.00 | 0.00 |

|      |     |      |     |    |        |        |       |      |      |
|------|-----|------|-----|----|--------|--------|-------|------|------|
| ATOM | 246 | CB   | LEU | 15 | 0.805  | 0.210  | 3.398 | 1.00 | 0.00 |
| ATOM | 247 | HB2  | LEU | 15 | -0.023 | 0.913  | 3.485 | 1.00 | 0.00 |
| ATOM | 248 | HB3  | LEU | 15 | 1.442  | 0.502  | 2.563 | 1.00 | 0.00 |
| ATOM | 249 | CG   | LEU | 15 | 0.255  | -1.198 | 3.152 | 1.00 | 0.00 |
| ATOM | 250 | HG   | LEU | 15 | -0.601 | -1.361 | 3.807 | 1.00 | 0.00 |
| ATOM | 251 | CD1  | LEU | 15 | -0.178 | -1.365 | 1.700 | 1.00 | 0.00 |
| ATOM | 252 | HD11 | LEU | 15 | 0.677  | -1.203 | 1.044 | 1.00 | 0.00 |
| ATOM | 253 | HD12 | LEU | 15 | -0.565 | -2.373 | 1.549 | 1.00 | 0.00 |
| ATOM | 254 | HD13 | LEU | 15 | -0.957 | -0.639 | 1.466 | 1.00 | 0.00 |
| ATOM | 255 | CD2  | LEU | 15 | 1.240  | -2.262 | 3.544 | 1.00 | 0.00 |
| ATOM | 256 | HD21 | LEU | 15 | 1.474  | -2.169 | 4.604 | 1.00 | 0.00 |
| ATOM | 257 | HD22 | LEU | 15 | 0.809  | -3.245 | 3.353 | 1.00 | 0.00 |
| ATOM | 258 | HD23 | LEU | 15 | 2.153  | -2.146 | 2.959 | 1.00 | 0.00 |
| ATOM | 259 | C    | LEU | 15 | 1.787  | 1.851  | 5.076 | 1.00 | 0.00 |
| ATOM | 260 | O    | LEU | 15 | 1.194  | 2.349  | 6.039 | 1.00 | 0.00 |
| ATOM | 261 | N    | ARG | 16 | 2.599  | 2.541  | 4.274 | 1.00 | 0.00 |
| ATOM | 262 | H    | ARG | 16 | 3.014  | 2.083  | 3.475 | 1.00 | 0.00 |
| ATOM | 263 | CA   | ARG | 16 | 2.908  | 3.933  | 4.502 | 1.00 | 0.00 |
| ATOM | 264 | HA   | ARG | 16 | 2.049  | 4.426  | 4.958 | 1.00 | 0.00 |
| ATOM | 265 | CB   | ARG | 16 | 4.109  | 4.085  | 5.433 | 1.00 | 0.00 |
| ATOM | 266 | HB2  | ARG | 16 | 4.813  | 3.279  | 5.227 | 1.00 | 0.00 |
| ATOM | 267 | HB3  | ARG | 16 | 4.586  | 5.044  | 5.232 | 1.00 | 0.00 |

|      |     |      |     |    |       |       |        |      |      |
|------|-----|------|-----|----|-------|-------|--------|------|------|
| ATOM | 268 | CG   | ARG | 16 | 3.681 | 4.026 | 6.900  | 1.00 | 0.00 |
| ATOM | 269 | HG2  | ARG | 16 | 2.610 | 3.829 | 6.943  | 1.00 | 0.00 |
| ATOM | 270 | HG3  | ARG | 16 | 4.219 | 3.213 | 7.388  | 1.00 | 0.00 |
| ATOM | 271 | CD   | ARG | 16 | 3.987 | 5.343 | 7.616  | 1.00 | 0.00 |
| ATOM | 272 | HD2  | ARG | 16 | 3.955 | 6.163 | 6.899  | 1.00 | 0.00 |
| ATOM | 273 | HD3  | ARG | 16 | 3.246 | 5.514 | 8.396  | 1.00 | 0.00 |
| ATOM | 274 | NE   | ARG | 16 | 5.326 | 5.308 | 8.235  | 1.00 | 0.00 |
| ATOM | 275 | HE   | ARG | 16 | 5.963 | 4.610 | 7.879  | 1.00 | 0.00 |
| ATOM | 276 | CZ   | ARG | 16 | 5.744 | 6.112 | 9.195  | 1.00 | 0.00 |
| ATOM | 277 | NH1  | ARG | 16 | 4.949 | 7.040 | 9.677  | 1.00 | 0.00 |
| ATOM | 278 | HH11 | ARG | 16 | 4.013 | 7.138 | 9.311  | 1.00 | 0.00 |
| ATOM | 279 | HH12 | ARG | 16 | 5.278 | 7.650 | 10.411 | 1.00 | 0.00 |
| ATOM | 280 | NH2  | ARG | 16 | 6.954 | 5.988 | 9.683  | 1.00 | 0.00 |
| ATOM | 281 | HH21 | ARG | 16 | 7.570 | 5.273 | 9.322  | 1.00 | 0.00 |
| ATOM | 282 | HH22 | ARG | 16 | 7.265 | 6.607 | 10.417 | 1.00 | 0.00 |
| ATOM | 283 | C    | ARG | 16 | 3.230 | 4.587 | 3.207  | 1.00 | 0.00 |
| ATOM | 284 | O    | ARG | 16 | 2.412 | 5.322 | 2.724  | 1.00 | 0.00 |
| ATOM | 285 | N    | ALA | 17 | 4.366 | 4.300 | 2.609  | 1.00 | 0.00 |
| ATOM | 286 | H    | ALA | 17 | 5.026 | 3.711 | 3.096  | 1.00 | 0.00 |
| ATOM | 287 | CA   | ALA | 17 | 4.753 | 4.851 | 1.337  | 1.00 | 0.00 |
| ATOM | 288 | HA   | ALA | 17 | 4.910 | 5.923 | 1.452  | 1.00 | 0.00 |
| ATOM | 289 | CB   | ALA | 17 | 6.069 | 4.210 | 0.872  | 1.00 | 0.00 |

|      |     |     |     |    |        |       |        |      |      |
|------|-----|-----|-----|----|--------|-------|--------|------|------|
| ATOM | 290 | HB1 | ALA | 17 | 5.926  | 3.137 | 0.743  | 1.00 | 0.00 |
| ATOM | 291 | HB2 | ALA | 17 | 6.373  | 4.651 | -0.077 | 1.00 | 0.00 |
| ATOM | 292 | HB3 | ALA | 17 | 6.843  | 4.385 | 1.619  | 1.00 | 0.00 |
| ATOM | 293 | C   | ALA | 17 | 3.629  | 4.677 | 0.297  | 1.00 | 0.00 |
| ATOM | 294 | O   | ALA | 17 | 3.531  | 5.420 | -0.670 | 1.00 | 0.00 |
| ATOM | 295 | N   | CYX | 18 | 2.690  | 3.761 | 0.555  | 1.00 | 0.00 |
| ATOM | 296 | H   | CYX | 18 | 2.791  | 3.203 | 1.391  | 1.00 | 0.00 |
| ATOM | 297 | CA  | CYX | 18 | 1.593  | 3.487 | -0.311 | 1.00 | 0.00 |
| ATOM | 298 | HA  | CYX | 18 | 1.880  | 3.704 | -1.340 | 1.00 | 0.00 |
| ATOM | 299 | CB  | CYX | 18 | 1.172  | 2.026 | -0.222 | 1.00 | 0.00 |
| ATOM | 300 | HB2 | CYX | 18 | 1.982  | 1.440 | 0.213  | 1.00 | 0.00 |
| ATOM | 301 | HB3 | CYX | 18 | 0.285  | 1.940 | 0.405  | 1.00 | 0.00 |
| ATOM | 302 | SG  | CYX | 18 | 0.810  | 1.231 | -1.805 | 1.00 | 0.00 |
| ATOM | 303 | C   | CYX | 18 | 0.479  | 4.421 | 0.068  | 1.00 | 0.00 |
| ATOM | 304 | O   | CYX | 18 | -0.077 | 5.119 | -0.762 | 1.00 | 0.00 |
| ATOM | 305 | N   | GLN | 19 | 0.150  | 4.467 | 1.356  | 1.00 | 0.00 |
| ATOM | 306 | H   | GLN | 19 | 0.583  | 3.818 | 1.997  | 1.00 | 0.00 |
| ATOM | 307 | CA  | GLN | 19 | -0.865 | 5.347 | 1.861  | 1.00 | 0.00 |
| ATOM | 308 | HA  | GLN | 19 | -1.583 | 5.584 | 1.076  | 1.00 | 0.00 |
| ATOM | 309 | CB  | GLN | 19 | -1.600 | 4.674 | 3.002  | 1.00 | 0.00 |
| ATOM | 310 | HB2 | GLN | 19 | -2.422 | 5.326 | 3.296  | 1.00 | 0.00 |
| ATOM | 311 | HB3 | GLN | 19 | -2.001 | 3.732 | 2.627  | 1.00 | 0.00 |

|      |     |      |     |    |        |       |       |      |      |
|------|-----|------|-----|----|--------|-------|-------|------|------|
| ATOM | 312 | CG   | GLN | 19 | -0.711 | 4.402 | 4.209 | 1.00 | 0.00 |
| ATOM | 313 | HG2  | GLN | 19 | -0.891 | 3.386 | 4.562 | 1.00 | 0.00 |
| ATOM | 314 | HG3  | GLN | 19 | 0.335  | 4.506 | 3.921 | 1.00 | 0.00 |
| ATOM | 315 | CD   | GLN | 19 | -1.001 | 5.371 | 5.346 | 1.00 | 0.00 |
| ATOM | 316 | OE1  | GLN | 19 | -0.115 | 6.003 | 5.921 | 1.00 | 0.00 |
| ATOM | 317 | NE2  | GLN | 19 | -2.276 | 5.492 | 5.688 | 1.00 | 0.00 |
| ATOM | 318 | HE21 | GLN | 19 | -2.538 | 6.118 | 6.435 | 1.00 | 0.00 |
| ATOM | 319 | HE22 | GLN | 19 | -2.980 | 4.957 | 5.199 | 1.00 | 0.00 |
| ATOM | 320 | C    | GLN | 19 | -0.282 | 6.674 | 2.277 | 1.00 | 0.00 |
| ATOM | 321 | O    | GLN | 19 | -0.778 | 7.288 | 3.192 | 1.00 | 0.00 |
| ATOM | 322 | N    | GLN | 20 | 0.801  | 7.115 | 1.660 | 1.00 | 0.00 |
| ATOM | 323 | H    | GLN | 20 | 1.180  | 6.547 | 0.915 | 1.00 | 0.00 |
| ATOM | 324 | CA   | GLN | 20 | 1.491  | 8.332 | 2.011 | 1.00 | 0.00 |
| ATOM | 325 | HA   | GLN | 20 | 0.845  | 8.926 | 2.657 | 1.00 | 0.00 |
| ATOM | 326 | CB   | GLN | 20 | 2.810  | 8.073 | 2.743 | 1.00 | 0.00 |
| ATOM | 327 | HB2  | GLN | 20 | 3.368  | 7.313 | 2.196 | 1.00 | 0.00 |
| ATOM | 328 | HB3  | GLN | 20 | 3.384  | 8.999 | 2.765 | 1.00 | 0.00 |
| ATOM | 329 | CG   | GLN | 20 | 2.562  | 7.591 | 4.180 | 1.00 | 0.00 |
| ATOM | 330 | HG2  | GLN | 20 | 1.600  | 7.081 | 4.241 | 1.00 | 0.00 |
| ATOM | 331 | HG3  | GLN | 20 | 3.360  | 6.892 | 4.433 | 1.00 | 0.00 |
| ATOM | 332 | CD   | GLN | 20 | 2.574  | 8.715 | 5.177 | 1.00 | 0.00 |
| ATOM | 333 | OE1  | GLN | 20 | 3.134  | 9.777 | 4.974 | 1.00 | 0.00 |

|      |     |      |     |    |        |        |        |      |      |
|------|-----|------|-----|----|--------|--------|--------|------|------|
| ATOM | 334 | NE2  | GLN | 20 | 1.905  | 8.504  | 6.299  | 1.00 | 0.00 |
| ATOM | 335 | HE21 | GLN | 20 | 1.876  | 9.222  | 7.008  | 1.00 | 0.00 |
| ATOM | 336 | HE22 | GLN | 20 | 1.427  | 7.625  | 6.440  | 1.00 | 0.00 |
| ATOM | 337 | C    | GLN | 20 | 1.755  | 9.120  | 0.754  | 1.00 | 0.00 |
| ATOM | 338 | O    | GLN | 20 | 1.572  | 10.328 | 0.730  | 1.00 | 0.00 |
| ATOM | 339 | N    | TRP | 21 | 2.131  | 8.433  | -0.325 | 1.00 | 0.00 |
| ATOM | 340 | H    | TRP | 21 | 2.297  | 7.439  | -0.255 | 1.00 | 0.00 |
| ATOM | 341 | CA   | TRP | 21 | 2.376  | 9.082  | -1.595 | 1.00 | 0.00 |
| ATOM | 342 | HA   | TRP | 21 | 3.139  | 9.851  | -1.477 | 1.00 | 0.00 |
| ATOM | 343 | CB   | TRP | 21 | 2.863  | 8.066  | -2.627 | 1.00 | 0.00 |
| ATOM | 344 | HB2  | TRP | 21 | 3.365  | 8.579  | -3.447 | 1.00 | 0.00 |
| ATOM | 345 | HB3  | TRP | 21 | 3.566  | 7.393  | -2.136 | 1.00 | 0.00 |
| ATOM | 346 | CG   | TRP | 21 | 1.808  | 7.207  | -3.243 | 1.00 | 0.00 |
| ATOM | 347 | CD1  | TRP | 21 | 1.463  | 5.938  | -2.935 | 1.00 | 0.00 |
| ATOM | 348 | HD1  | TRP | 21 | 2.050  | 5.482  | -2.138 | 1.00 | 0.00 |
| ATOM | 349 | NE1  | TRP | 21 | 0.417  | 5.481  | -3.715 | 1.00 | 0.00 |
| ATOM | 350 | HE1  | TRP | 21 | -0.022 | 4.574  | -3.638 | 1.00 | 0.00 |
| ATOM | 351 | CE2  | TRP | 21 | 0.049  | 6.472  | -4.590 | 1.00 | 0.00 |
| ATOM | 352 | CZ2  | TRP | 21 | -0.938 | 6.547  | -5.571 | 1.00 | 0.00 |
| ATOM | 353 | HZ2  | TRP | 21 | -1.560 | 5.666  | -5.733 | 1.00 | 0.00 |
| ATOM | 354 | CH2  | TRP | 21 | -1.071 | 7.737  | -6.284 | 1.00 | 0.00 |
| ATOM | 355 | HH2  | TRP | 21 | -1.814 | 7.822  | -7.077 | 1.00 | 0.00 |

|      |     |          |    |        |        |        |      |      |
|------|-----|----------|----|--------|--------|--------|------|------|
| ATOM | 356 | CZ3 TRP  | 21 | -0.255 | 8.841  | -5.995 | 1.00 | 0.00 |
| ATOM | 357 | HZ3 TRP  | 21 | -0.401 | 9.782  | -6.525 | 1.00 | 0.00 |
| ATOM | 358 | CE3 TRP  | 21 | 0.759  | 8.779  | -5.034 | 1.00 | 0.00 |
| ATOM | 359 | HE3 TRP  | 21 | 1.390  | 9.654  | -4.882 | 1.00 | 0.00 |
| ATOM | 360 | CD2 TRP  | 21 | 0.913  | 7.585  | -4.301 | 1.00 | 0.00 |
| ATOM | 361 | C TRP    | 21 | 1.101  | 9.776  | -2.042 | 1.00 | 0.00 |
| ATOM | 362 | O TRP    | 21 | 1.118  | 10.846 | -2.639 | 1.00 | 0.00 |
| ATOM | 363 | N ILE    | 22 | -0.050 | 9.176  | -1.715 | 1.00 | 0.00 |
| ATOM | 364 | H ILE    | 22 | -0.024 | 8.292  | -1.227 | 1.00 | 0.00 |
| ATOM | 365 | CA ILE   | 22 | -1.339 | 9.716  | -2.086 | 1.00 | 0.00 |
| ATOM | 366 | HA ILE   | 22 | -1.352 | 10.045 | -3.125 | 1.00 | 0.00 |
| ATOM | 367 | CB ILE   | 22 | -2.434 | 8.664  | -1.870 | 1.00 | 0.00 |
| ATOM | 368 | HB ILE   | 22 | -2.488 | 8.416  | -0.810 | 1.00 | 0.00 |
| ATOM | 369 | CG2 ILE  | 22 | -3.788 | 9.208  | -2.336 | 1.00 | 0.00 |
| ATOM | 370 | HG21 ILE | 22 | -3.735 | 9.455  | -3.396 | 1.00 | 0.00 |
| ATOM | 371 | HG22 ILE | 22 | -4.558 | 8.452  | -2.178 | 1.00 | 0.00 |
| ATOM | 372 | HG23 ILE | 22 | -4.036 | 10.103 | -1.766 | 1.00 | 0.00 |
| ATOM | 373 | CG1 ILE  | 22 | -2.088 | 7.363  | -2.601 | 1.00 | 0.00 |
| ATOM | 374 | HG12 ILE | 22 | -2.353 | 7.475  | -3.653 | 1.00 | 0.00 |
| ATOM | 375 | HG13 ILE | 22 | -1.015 | 7.191  | -2.513 | 1.00 | 0.00 |
| ATOM | 376 | CD1 ILE  | 22 | -2.843 | 6.176  | -2.011 | 1.00 | 0.00 |
| ATOM | 377 | HD11 ILE | 22 | -3.916 | 6.347  | -2.099 | 1.00 | 0.00 |

|      |     |      |     |    |        |        |        |      |      |
|------|-----|------|-----|----|--------|--------|--------|------|------|
| ATOM | 378 | HD12 | ILE | 22 | -2.575 | 5.268  | -2.553 | 1.00 | 0.00 |
| ATOM | 379 | HD13 | ILE | 22 | -2.579 | 6.062  | -0.960 | 1.00 | 0.00 |
| ATOM | 380 | C    | ILE | 22 | -1.586 | 10.967 | -1.267 | 1.00 | 0.00 |
| ATOM | 381 | O    | ILE | 22 | -2.224 | 11.905 | -1.721 | 1.00 | 0.00 |
| ATOM | 382 | N    | ARG | 23 | -1.064 | 11.005 | -0.035 | 1.00 | 0.00 |
| ATOM | 383 | H    | ARG | 23 | -0.605 | 10.181 | 0.328  | 1.00 | 0.00 |
| ATOM | 384 | CA   | ARG | 23 | -1.164 | 12.166 | 0.819  | 1.00 | 0.00 |
| ATOM | 385 | HA   | ARG | 23 | -2.202 | 12.496 | 0.863  | 1.00 | 0.00 |
| ATOM | 386 | CB   | ARG | 23 | -0.694 | 11.851 | 2.232  | 1.00 | 0.00 |
| ATOM | 387 | HB2  | ARG | 23 | 0.083  | 11.088 | 2.183  | 1.00 | 0.00 |
| ATOM | 388 | HB3  | ARG | 23 | -0.285 | 12.757 | 2.677  | 1.00 | 0.00 |
| ATOM | 389 | CG   | ARG | 23 | -1.851 | 11.343 | 3.086  | 1.00 | 0.00 |
| ATOM | 390 | HG2  | ARG | 23 | -1.699 | 11.668 | 4.115  | 1.00 | 0.00 |
| ATOM | 391 | HG3  | ARG | 23 | -2.781 | 11.765 | 2.706  | 1.00 | 0.00 |
| ATOM | 392 | CD   | ARG | 23 | -1.928 | 9.822  | 3.041  | 1.00 | 0.00 |
| ATOM | 393 | HD2  | ARG | 23 | -2.850 | 9.507  | 2.552  | 1.00 | 0.00 |
| ATOM | 394 | HD3  | ARG | 23 | -1.074 | 9.419  | 2.497  | 1.00 | 0.00 |
| ATOM | 395 | NE   | ARG | 23 | -1.912 | 9.277  | 4.426  | 1.00 | 0.00 |
| ATOM | 396 | HE   | ARG | 23 | -2.696 | 8.687  | 4.667  | 1.00 | 0.00 |
| ATOM | 397 | CZ   | ARG | 23 | -0.954 | 9.431  | 5.304  | 1.00 | 0.00 |
| ATOM | 398 | NH1  | ARG | 23 | 0.073  | 10.184 | 5.002  | 1.00 | 0.00 |
| ATOM | 399 | HH11 | ARG | 23 | 0.116  | 10.636 | 4.100  | 1.00 | 0.00 |



|      |     |      |     |    |        |        |        |      |      |
|------|-----|------|-----|----|--------|--------|--------|------|------|
| ATOM | 400 | HH12 | ARG | 23 | 0.818  | 10.309 | 5.672  | 1.00 | 0.00 |
| ATOM | 401 | NH2  | ARG | 23 | -1.055 | 8.911  | 6.501  | 1.00 | 0.00 |
| ATOM | 402 | HH21 | ARG | 23 | -1.880 | 8.385  | 6.752  | 1.00 | 0.00 |
| ATOM | 403 | HH22 | ARG | 23 | -0.308 | 9.038  | 7.168  | 1.00 | 0.00 |
| ATOM | 404 | C    | ARG | 23 | -0.349 | 13.336 | 0.273  | 1.00 | 0.00 |
| ATOM | 405 | O    | ARG | 23 | -0.563 | 14.483 | 0.666  | 1.00 | 0.00 |
| ATOM | 406 | N    | GLN | 24 | 0.586  | 13.045 | -0.625 | 1.00 | 0.00 |
| ATOM | 407 | H    | GLN | 24 | 0.773  | 12.079 | -0.854 | 1.00 | 0.00 |
| ATOM | 408 | CA   | GLN | 24 | 1.392  | 14.062 | -1.247 | 1.00 | 0.00 |
| ATOM | 409 | HA   | GLN | 24 | 1.609  | 14.855 | -0.531 | 1.00 | 0.00 |
| ATOM | 410 | CB   | GLN | 24 | 2.712  | 13.465 | -1.728 | 1.00 | 0.00 |
| ATOM | 411 | HB2  | GLN | 24 | 2.586  | 12.391 | -1.865 | 1.00 | 0.00 |
| ATOM | 412 | HB3  | GLN | 24 | 2.982  | 13.923 | -2.680 | 1.00 | 0.00 |
| ATOM | 413 | CG   | GLN | 24 | 3.821  | 13.721 | -0.707 | 1.00 | 0.00 |
| ATOM | 414 | HG2  | GLN | 24 | 4.538  | 14.426 | -1.127 | 1.00 | 0.00 |
| ATOM | 415 | HG3  | GLN | 24 | 3.376  | 14.148 | 0.191  | 1.00 | 0.00 |
| ATOM | 416 | CD   | GLN | 24 | 4.555  | 12.452 | -0.327 | 1.00 | 0.00 |
| ATOM | 417 | OE1  | GLN | 24 | 4.580  | 11.483 | -1.058 | 1.00 | 0.00 |
| ATOM | 418 | NE2  | GLN | 24 | 5.171  | 12.454 | 0.834  | 1.00 | 0.00 |
| ATOM | 419 | HE21 | GLN | 24 | 5.676  | 11.633 | 1.136  | 1.00 | 0.00 |
| ATOM | 420 | HE22 | GLN | 24 | 5.137  | 13.276 | 1.419  | 1.00 | 0.00 |
| ATOM | 421 | C    | GLN | 24 | 0.656  | 14.720 | -2.401 | 1.00 | 0.00 |

|      |     |      |     |    |        |        |        |      |      |
|------|-----|------|-----|----|--------|--------|--------|------|------|
| ATOM | 422 | O    | GLN | 24 | 1.085  | 15.749 | -2.910 | 1.00 | 0.00 |
| ATOM | 423 | N    | GLN | 25 | -0.456 | 14.102 | -2.827 | 1.00 | 0.00 |
| ATOM | 424 | H    | GLN | 25 | -0.715 | 13.208 | -2.435 | 1.00 | 0.00 |
| ATOM | 425 | CA   | GLN | 25 | -1.266 | 14.643 | -3.891 | 1.00 | 0.00 |
| ATOM | 426 | HA   | GLN | 25 | -0.629 | 14.971 | -4.712 | 1.00 | 0.00 |
| ATOM | 427 | CB   | GLN | 25 | -2.233 | 13.578 | -4.417 | 1.00 | 0.00 |
| ATOM | 428 | HB2  | GLN | 25 | -2.140 | 12.680 | -3.807 | 1.00 | 0.00 |
| ATOM | 429 | HB3  | GLN | 25 | -3.252 | 13.958 | -4.350 | 1.00 | 0.00 |
| ATOM | 430 | CG   | GLN | 25 | -1.911 | 13.240 | -5.872 | 1.00 | 0.00 |
| ATOM | 431 | HG2  | GLN | 25 | -0.830 | 13.105 | -5.894 | 1.00 | 0.00 |
| ATOM | 432 | HG3  | GLN | 25 | -2.397 | 12.325 | -6.212 | 1.00 | 0.00 |
| ATOM | 433 | CD   | GLN | 25 | -2.279 | 14.367 | -6.821 | 1.00 | 0.00 |
| ATOM | 434 | OE1  | GLN | 25 | -2.771 | 15.409 | -6.468 | 1.00 | 0.00 |
| ATOM | 435 | NE2  | GLN | 25 | -2.129 | 14.121 | -8.105 | 1.00 | 0.00 |
| ATOM | 436 | HE21 | GLN | 25 | -2.358 | 14.834 | -8.783 | 1.00 | 0.00 |
| ATOM | 437 | HE22 | GLN | 25 | -1.785 | 13.220 | -8.407 | 1.00 | 0.00 |
| ATOM | 438 | C    | GLN | 25 | -2.018 | 15.885 | -3.417 | 1.00 | 0.00 |
| ATOM | 439 | O    | GLN | 25 | -2.631 | 16.616 | -4.183 | 1.00 | 0.00 |
| ATOM | 440 | N    | LEU | 26 | -2.007 | 16.135 | -2.111 | 1.00 | 0.00 |
| ATOM | 441 | H    | LEU | 26 | -1.584 | 15.459 | -1.491 | 1.00 | 0.00 |
| ATOM | 442 | CA   | LEU | 26 | -2.682 | 17.263 | -1.531 | 1.00 | 0.00 |
| ATOM | 443 | HA   | LEU | 26 | -3.200 | 17.822 | -2.310 | 1.00 | 0.00 |

|      |     |      |     |    |        |        |        |      |      |
|------|-----|------|-----|----|--------|--------|--------|------|------|
| ATOM | 444 | CB   | LEU | 26 | -3.713 | 16.801 | -0.490 | 1.00 | 0.00 |
| ATOM | 445 | HB2  | LEU | 26 | -3.198 | 16.901 | 0.465  | 1.00 | 0.00 |
| ATOM | 446 | HB3  | LEU | 26 | -4.563 | 17.482 | -0.518 | 1.00 | 0.00 |
| ATOM | 447 | CG   | LEU | 26 | -4.209 | 15.357 | -0.654 | 1.00 | 0.00 |
| ATOM | 448 | HG   | LEU | 26 | -4.094 | 15.057 | -1.696 | 1.00 | 0.00 |
| ATOM | 449 | CD1  | LEU | 26 | -3.409 | 14.419 | 0.233  | 1.00 | 0.00 |
| ATOM | 450 | HD11 | LEU | 26 | -3.524 | 14.717 | 1.275  | 1.00 | 0.00 |
| ATOM | 451 | HD12 | LEU | 26 | -3.773 | 13.399 | 0.105  | 1.00 | 0.00 |
| ATOM | 452 | HD13 | LEU | 26 | -2.356 | 14.466 | -0.044 | 1.00 | 0.00 |
| ATOM | 453 | CD2  | LEU | 26 | -5.699 | 15.256 | -0.332 | 1.00 | 0.00 |
| ATOM | 454 | HD21 | LEU | 26 | -6.262 | 15.899 | -1.008 | 1.00 | 0.00 |
| ATOM | 455 | HD22 | LEU | 26 | -6.029 | 14.224 | -0.455 | 1.00 | 0.00 |
| ATOM | 456 | HD23 | LEU | 26 | -5.871 | 15.572 | 0.697  | 1.00 | 0.00 |
| ATOM | 457 | C    | LEU | 26 | -1.649 | 18.233 | -0.984 | 1.00 | 0.00 |
| ATOM | 458 | O    | LEU | 26 | -0.455 | 18.109 | -1.227 | 1.00 | 0.00 |
| ATOM | 459 | N    | ALA | 27 | -2.122 | 19.198 | -0.198 | 1.00 | 0.00 |
| ATOM | 460 | H    | ALA | 27 | -3.120 | 19.297 | -0.075 | 1.00 | 0.00 |
| ATOM | 461 | CA   | ALA | 27 | -1.251 | 20.174 | 0.429  | 1.00 | 0.00 |
| ATOM | 462 | HA   | ALA | 27 | -0.355 | 20.325 | -0.173 | 1.00 | 0.00 |
| ATOM | 463 | CB   | ALA | 27 | -1.998 | 21.498 | 0.531  | 1.00 | 0.00 |
| ATOM | 464 | HB1  | ALA | 27 | -2.893 | 21.365 | 1.138  | 1.00 | 0.00 |
| ATOM | 465 | HB2  | ALA | 27 | -1.353 | 22.245 | 0.994  | 1.00 | 0.00 |

|      |     |     |     |    |        |        |        |      |      |
|------|-----|-----|-----|----|--------|--------|--------|------|------|
| ATOM | 466 | HB3 | ALA | 27 | -2.283 | 21.833 | -0.467 | 1.00 | 0.00 |
| ATOM | 467 | C   | ALA | 27 | -0.775 | 19.660 | 1.785  | 1.00 | 0.00 |
| ATOM | 468 | O   | ALA | 27 | -0.336 | 20.427 | 2.637  | 1.00 | 0.00 |
| ATOM | 469 | N   | GLY | 28 | -0.919 | 18.347 | 2.018  | 1.00 | 0.00 |
| ATOM | 470 | H   | GLY | 28 | -1.346 | 17.770 | 1.307  | 1.00 | 0.00 |
| ATOM | 471 | CA  | GLY | 28 | -0.490 | 17.717 | 3.245  | 1.00 | 0.00 |
| ATOM | 472 | HA2 | GLY | 28 | -0.698 | 18.388 | 4.078  | 1.00 | 0.00 |
| ATOM | 473 | HA3 | GLY | 28 | -1.046 | 16.789 | 3.379  | 1.00 | 0.00 |
| ATOM | 474 | C   | GLY | 28 | 0.998  | 17.404 | 3.221  | 1.00 | 0.00 |
| ATOM | 475 | O   | GLY | 28 | 1.476  | 16.640 | 4.054  | 1.00 | 0.00 |
| ATOM | 476 | N   | SER | 29 | 1.718  | 17.949 | 2.240  | 1.00 | 0.00 |
| ATOM | 477 | H   | SER | 29 | 1.244  | 18.492 | 1.533  | 1.00 | 0.00 |
| ATOM | 478 | CA  | SER | 29 | 3.140  | 17.749 | 2.109  | 1.00 | 0.00 |
| ATOM | 479 | HA  | SER | 29 | 3.592  | 17.613 | 3.091  | 1.00 | 0.00 |
| ATOM | 480 | CB  | SER | 29 | 3.413  | 16.503 | 1.270  | 1.00 | 0.00 |
| ATOM | 481 | HB2 | SER | 29 | 3.163  | 15.636 | 1.882  | 1.00 | 0.00 |
| ATOM | 482 | HB3 | SER | 29 | 2.750  | 16.540 | 0.406  | 1.00 | 0.00 |
| ATOM | 483 | OG  | SER | 29 | 4.753  | 16.399 | 0.831  | 1.00 | 0.00 |
| ATOM | 484 | HG  | SER | 29 | 4.858  | 15.598 | 0.311  | 1.00 | 0.00 |
| ATOM | 485 | C   | SER | 29 | 3.812  | 18.956 | 1.498  | 1.00 | 0.00 |
| ATOM | 486 | O   | SER | 29 | 3.166  | 19.686 | 0.775  | 1.00 | 0.00 |
| ATOM | 487 | N   | PRO | 30 | 5.071  | 19.200 | 1.864  | 1.00 | 0.00 |

|      |     |     |     |    |       |        |        |      |      |
|------|-----|-----|-----|----|-------|--------|--------|------|------|
| ATOM | 488 | CD  | PRO | 30 | 5.854 | 18.389 | 2.780  | 1.00 | 0.00 |
| ATOM | 489 | HD2 | PRO | 30 | 6.024 | 17.420 | 2.310  | 1.00 | 0.00 |
| ATOM | 490 | HD3 | PRO | 30 | 5.271 | 18.253 | 3.691  | 1.00 | 0.00 |
| ATOM | 491 | CG  | PRO | 30 | 7.149 | 19.155 | 3.027  | 1.00 | 0.00 |
| ATOM | 492 | HG2 | PRO | 30 | 7.988 | 18.563 | 2.660  | 1.00 | 0.00 |
| ATOM | 493 | HG3 | PRO | 30 | 7.264 | 19.323 | 4.098  | 1.00 | 0.00 |
| ATOM | 494 | CB  | PRO | 30 | 7.030 | 20.483 | 2.275  | 1.00 | 0.00 |
| ATOM | 495 | HB2 | PRO | 30 | 7.932 | 20.701 | 1.703  | 1.00 | 0.00 |
| ATOM | 496 | HB3 | PRO | 30 | 6.829 | 21.304 | 2.963  | 1.00 | 0.00 |
| ATOM | 497 | CA  | PRO | 30 | 5.848 | 20.296 | 1.329  | 1.00 | 0.00 |
| ATOM | 498 | HA  | PRO | 30 | 5.237 | 21.197 | 1.378  | 1.00 | 0.00 |
| ATOM | 499 | C   | PRO | 30 | 6.276 | 20.056 | -0.098 | 1.00 | 0.00 |
| ATOM | 500 | O   | PRO | 30 | 5.950 | 19.025 | -0.675 | 1.00 | 0.00 |
| ATOM | 501 | N   | PHE | 31 | 7.045 | 21.000 | -0.652 | 1.00 | 0.00 |
| ATOM | 502 | H   | PHE | 31 | 7.316 | 21.807 | -0.109 | 1.00 | 0.00 |
| ATOM | 503 | CA  | PHE | 31 | 7.516 | 20.902 | -2.015 | 1.00 | 0.00 |
| ATOM | 504 | HA  | PHE | 31 | 7.771 | 19.873 | -2.269 | 1.00 | 0.00 |
| ATOM | 505 | CB  | PHE | 31 | 6.386 | 21.368 | -2.938 | 1.00 | 0.00 |
| ATOM | 506 | HB2 | PHE | 31 | 6.318 | 22.454 | -2.996 | 1.00 | 0.00 |
| ATOM | 507 | HB3 | PHE | 31 | 6.612 | 20.966 | -3.926 | 1.00 | 0.00 |
| ATOM | 508 | CG  | PHE | 31 | 5.003 | 20.866 | -2.572 | 1.00 | 0.00 |
| ATOM | 509 | CD1 | PHE | 31 | 4.596 | 19.577 | -2.951 | 1.00 | 0.00 |

|      |     |     |     |    |        |        |        |      |      |
|------|-----|-----|-----|----|--------|--------|--------|------|------|
| ATOM | 510 | HD1 | PHE | 31 | 5.258  | 18.959 | -3.559 | 1.00 | 0.00 |
| ATOM | 511 | CE1 | PHE | 31 | 3.345  | 19.082 | -2.552 | 1.00 | 0.00 |
| ATOM | 512 | HE1 | PHE | 31 | 3.053  | 18.064 | -2.811 | 1.00 | 0.00 |
| ATOM | 513 | CZ  | PHE | 31 | 2.472  | 19.896 | -1.821 | 1.00 | 0.00 |
| ATOM | 514 | HZ  | PHE | 31 | 1.480  | 19.533 | -1.550 | 1.00 | 0.00 |
| ATOM | 515 | CE2 | PHE | 31 | 2.878  | 21.185 | -1.436 | 1.00 | 0.00 |
| ATOM | 516 | HE2 | PHE | 31 | 2.197  | 21.818 | -0.867 | 1.00 | 0.00 |
| ATOM | 517 | CD2 | PHE | 31 | 4.152  | 21.658 | -1.781 | 1.00 | 0.00 |
| ATOM | 518 | HD2 | PHE | 31 | 4.481  | 22.638 | -1.436 | 1.00 | 0.00 |
| ATOM | 519 | C   | PHE | 31 | 8.734  | 21.782 | -2.235 | 1.00 | 0.00 |
| ATOM | 520 | O   | PHE | 31 | 8.868  | 22.826 | -1.593 | 1.00 | 0.00 |
| ATOM | 521 | N   | SER | 32 | 9.614  | 21.355 | -3.138 | 1.00 | 0.00 |
| ATOM | 522 | H   | SER | 32 | 9.474  | 20.465 | -3.596 | 1.00 | 0.00 |
| ATOM | 523 | CA  | SER | 32 | 10.812 | 22.110 | -3.454 | 1.00 | 0.00 |
| ATOM | 524 | HA  | SER | 32 | 10.713 | 23.131 | -3.087 | 1.00 | 0.00 |
| ATOM | 525 | CB  | SER | 32 | 12.041 | 21.467 | -2.793 | 1.00 | 0.00 |
| ATOM | 526 | HB2 | SER | 32 | 11.728 | 20.536 | -2.320 | 1.00 | 0.00 |
| ATOM | 527 | HB3 | SER | 32 | 12.774 | 21.250 | -3.570 | 1.00 | 0.00 |
| ATOM | 528 | OG  | SER | 32 | 12.621 | 22.317 | -1.823 | 1.00 | 0.00 |
| ATOM | 529 | HG  | SER | 32 | 13.383 | 21.883 | -1.433 | 1.00 | 0.00 |
| ATOM | 530 | C   | SER | 32 | 10.993 | 22.190 | -4.962 | 1.00 | 0.00 |
| ATOM | 531 | O   | SER | 32 | 10.634 | 23.187 | -5.588 | 1.00 | 0.00 |

|      |     |     |     |    |        |        |         |      |      |
|------|-----|-----|-----|----|--------|--------|---------|------|------|
| ATOM | 532 | N   | GLU | 33 | 11.546 | 21.122 | -5.546  | 1.00 | 0.00 |
| ATOM | 533 | H   | GLU | 33 | 11.874 | 20.356 | -4.976  | 1.00 | 0.00 |
| ATOM | 534 | CA  | GLU | 33 | 11.779 | 21.064 | -6.968  | 1.00 | 0.00 |
| ATOM | 535 | HA  | GLU | 33 | 11.974 | 22.066 | -7.350  | 1.00 | 0.00 |
| ATOM | 536 | CB  | GLU | 33 | 12.989 | 20.175 | -7.282  | 1.00 | 0.00 |
| ATOM | 537 | HB2 | GLU | 33 | 13.260 | 19.628 | -6.379  | 1.00 | 0.00 |
| ATOM | 538 | HB3 | GLU | 33 | 12.706 | 19.469 | -8.063  | 1.00 | 0.00 |
| ATOM | 539 | CG  | GLU | 33 | 14.181 | 21.002 | -7.752  | 1.00 | 0.00 |
| ATOM | 540 | HG2 | GLU | 33 | 14.300 | 20.862 | -8.827  | 1.00 | 0.00 |
| ATOM | 541 | HG3 | GLU | 33 | 13.987 | 22.053 | -7.542  | 1.00 | 0.00 |
| ATOM | 542 | CD  | GLU | 33 | 15.459 | 20.568 | -7.038  | 1.00 | 0.00 |
| ATOM | 543 | OE1 | GLU | 33 | 15.840 | 19.388 | -7.215  | 1.00 | 0.00 |
| ATOM | 544 | OE2 | GLU | 33 | 16.030 | 21.421 | -6.326  | 1.00 | 0.00 |
| ATOM | 545 | C   | GLU | 33 | 10.523 | 20.593 | -7.691  | 1.00 | 0.00 |
| ATOM | 546 | O   | GLU | 33 | 9.440  | 20.499 | -7.106  | 1.00 | 0.00 |
| ATOM | 547 | N   | ASN | 34 | 10.675 | 20.268 | -8.980  | 1.00 | 0.00 |
| ATOM | 548 | H   | ASN | 34 | 11.573 | 20.393 | -9.424  | 1.00 | 0.00 |
| ATOM | 549 | CA  | ASN | 34 | 9.592  | 19.749 | -9.768  | 1.00 | 0.00 |
| ATOM | 550 | HA  | ASN | 34 | 8.642  | 20.142 | -9.406  | 1.00 | 0.00 |
| ATOM | 551 | CB  | ASN | 34 | 9.768  | 20.164 | -11.227 | 1.00 | 0.00 |
| ATOM | 552 | HB2 | ASN | 34 | 10.835 | 20.190 | -11.450 | 1.00 | 0.00 |
| ATOM | 553 | HB3 | ASN | 34 | 9.277  | 19.447 | -11.885 | 1.00 | 0.00 |

|      |     |      |     |    |        |        |         |      |      |
|------|-----|------|-----|----|--------|--------|---------|------|------|
| ATOM | 554 | CG   | ASN | 34 | 9.186  | 21.536 | -11.487 | 1.00 | 0.00 |
| ATOM | 555 | OD1  | ASN | 34 | 8.118  | 21.891 | -11.017 | 1.00 | 0.00 |
| ATOM | 556 | ND2  | ASN | 34 | 9.902  | 22.312 | -12.277 | 1.00 | 0.00 |
| ATOM | 557 | HD21 | ASN | 34 | 9.576  | 23.242 | -12.496 | 1.00 | 0.00 |
| ATOM | 558 | HD22 | ASN | 34 | 10.773 | 21.972 | -12.660 | 1.00 | 0.00 |
| ATOM | 559 | C    | ASN | 34 | 9.549  | 18.239 | -9.687  | 1.00 | 0.00 |
| ATOM | 560 | O    | ASN | 34 | 10.595 | 17.593 | -9.630  | 1.00 | 0.00 |
| ATOM | 561 | N    | GLN | 35 | 8.349  | 17.675 | -9.779  | 1.00 | 0.00 |
| ATOM | 562 | H    | GLN | 35 | 7.531  | 18.266 | -9.821  | 1.00 | 0.00 |
| ATOM | 563 | CA   | GLN | 35 | 8.159  | 16.247 | -9.761  | 1.00 | 0.00 |
| ATOM | 564 | HA   | GLN | 35 | 8.661  | 15.801 | -10.620 | 1.00 | 0.00 |
| ATOM | 565 | CB   | GLN | 35 | 8.737  | 15.635 | -8.485  | 1.00 | 0.00 |
| ATOM | 566 | HB2  | GLN | 35 | 9.517  | 16.296 | -8.109  | 1.00 | 0.00 |
| ATOM | 567 | HB3  | GLN | 35 | 7.938  | 15.560 | -7.747  | 1.00 | 0.00 |
| ATOM | 568 | CG   | GLN | 35 | 9.324  | 14.251 | -8.741  | 1.00 | 0.00 |
| ATOM | 569 | HG2  | GLN | 35 | 9.559  | 13.768 | -7.792  | 1.00 | 0.00 |
| ATOM | 570 | HG3  | GLN | 35 | 8.586  | 13.655 | -9.278  | 1.00 | 0.00 |
| ATOM | 571 | CD   | GLN | 35 | 10.592 | 14.323 | -9.577  | 1.00 | 0.00 |
| ATOM | 572 | OE1  | GLN | 35 | 11.634 | 14.783 | -9.154  | 1.00 | 0.00 |
| ATOM | 573 | NE2  | GLN | 35 | 10.486 | 13.832 | -10.801 | 1.00 | 0.00 |
| ATOM | 574 | HE21 | GLN | 35 | 11.286 | 13.844 | -11.418 | 1.00 | 0.00 |
| ATOM | 575 | HE22 | GLN | 35 | 9.606  | 13.447 | -11.113 | 1.00 | 0.00 |



|      |     |     |     |    |        |        |         |      |      |
|------|-----|-----|-----|----|--------|--------|---------|------|------|
| ATOM | 576 | C   | GLN | 35 | 6.692  | 15.927 | -9.894  | 1.00 | 0.00 |
| ATOM | 577 | O   | GLN | 35 | 5.848  | 16.780 | -9.615  | 1.00 | 0.00 |
| ATOM | 578 | N   | TRP | 36 | 6.396  | 14.670 | -10.273 | 1.00 | 0.00 |
| ATOM | 579 | H   | TRP | 36 | 7.138  | 14.029 | -10.516 | 1.00 | 0.00 |
| ATOM | 580 | CA  | TRP | 36 | 5.021  | 14.215 | -10.407 | 1.00 | 0.00 |
| ATOM | 581 | HA  | TRP | 36 | 4.565  | 14.673 | -11.285 | 1.00 | 0.00 |
| ATOM | 582 | CB  | TRP | 36 | 4.970  | 12.692 | -10.568 | 1.00 | 0.00 |
| ATOM | 583 | HB2 | TRP | 36 | 5.254  | 12.407 | -11.581 | 1.00 | 0.00 |
| ATOM | 584 | HB3 | TRP | 36 | 5.661  | 12.240 | -9.857  | 1.00 | 0.00 |
| ATOM | 585 | CG  | TRP | 36 | 3.623  | 12.076 | -10.309 | 1.00 | 0.00 |
| ATOM | 586 | CD1 | TRP | 36 | 2.941  | 11.996 | -9.133  | 1.00 | 0.00 |
| ATOM | 587 | HD1 | TRP | 36 | 3.448  | 12.425 | -8.269  | 1.00 | 0.00 |
| ATOM | 588 | NE1 | TRP | 36 | 1.717  | 11.369 | -9.294  | 1.00 | 0.00 |
| ATOM | 589 | HE1 | TRP | 36 | 1.050  | 11.184 | -8.559  | 1.00 | 0.00 |
| ATOM | 590 | CE2 | TRP | 36 | 1.566  | 11.019 | -10.615 | 1.00 | 0.00 |
| ATOM | 591 | CZ2 | TRP | 36 | 0.538  | 10.364 | -11.294 | 1.00 | 0.00 |
| ATOM | 592 | HZ2 | TRP | 36 | -0.342 | 10.061 | -10.727 | 1.00 | 0.00 |
| ATOM | 593 | CH2 | TRP | 36 | 0.702  | 10.136 | -12.669 | 1.00 | 0.00 |
| ATOM | 594 | HH2 | TRP | 36 | -0.077 | 9.628  | -13.238 | 1.00 | 0.00 |
| ATOM | 595 | CZ3 | TRP | 36 | 1.868  | 10.557 | -13.334 | 1.00 | 0.00 |
| ATOM | 596 | HZ3 | TRP | 36 | 1.984  | 10.374 | -14.403 | 1.00 | 0.00 |
| ATOM | 597 | CE3 | TRP | 36 | 2.907  | 11.215 | -12.663 | 1.00 | 0.00 |

|      |     |         |    |       |        |         |      |      |
|------|-----|---------|----|-------|--------|---------|------|------|
| ATOM | 598 | HE3 TRP | 36 | 3.791 | 11.508 | -13.229 | 1.00 | 0.00 |
| ATOM | 599 | CD2 TRP | 36 | 2.766 | 11.455 | -11.282 | 1.00 | 0.00 |
| ATOM | 600 | C TRP   | 36 | 4.218 | 14.677 | -9.183  | 1.00 | 0.00 |
| ATOM | 601 | O TRP   | 36 | 3.023 | 14.926 | -9.275  | 1.00 | 0.00 |
| ATOM | 602 | N GLY   | 37 | 4.896 | 14.775 | -8.027  | 1.00 | 0.00 |
| ATOM | 603 | H GLY   | 37 | 5.860 | 14.475 | -7.992  | 1.00 | 0.00 |
| ATOM | 604 | CA GLY  | 37 | 4.300 | 15.293 | -6.827  | 1.00 | 0.00 |
| ATOM | 605 | HA2 GLY | 37 | 3.856 | 16.265 | -7.039  | 1.00 | 0.00 |
| ATOM | 606 | HA3 GLY | 37 | 3.524 | 14.606 | -6.488  | 1.00 | 0.00 |
| ATOM | 607 | C GLY   | 37 | 5.333 | 15.451 | -5.729  | 1.00 | 0.00 |
| ATOM | 608 | O GLY   | 37 | 5.875 | 16.536 | -5.533  | 1.00 | 0.00 |
| ATOM | 609 | N PRO   | 38 | 5.632 | 14.342 | -5.035  | 1.00 | 0.00 |
| ATOM | 610 | CD PRO  | 38 | 5.046 | 13.021 | -5.229  | 1.00 | 0.00 |
| ATOM | 611 | HD2 PRO | 38 | 5.388 | 12.641 | -6.192  | 1.00 | 0.00 |
| ATOM | 612 | HD3 PRO | 38 | 3.962 | 13.135 | -5.248  | 1.00 | 0.00 |
| ATOM | 613 | CG PRO  | 38 | 5.521 | 12.163 | -4.058  | 1.00 | 0.00 |
| ATOM | 614 | HG2 PRO | 38 | 6.131 | 11.344 | -4.439  | 1.00 | 0.00 |
| ATOM | 615 | HG3 PRO | 38 | 4.654 | 11.757 | -3.536  | 1.00 | 0.00 |
| ATOM | 616 | CB PRO  | 38 | 6.328 | 13.081 | -3.143  | 1.00 | 0.00 |
| ATOM | 617 | HB2 PRO | 38 | 7.269 | 12.613 | -2.853  | 1.00 | 0.00 |
| ATOM | 618 | HB3 PRO | 38 | 5.761 | 13.340 | -2.249  | 1.00 | 0.00 |
| ATOM | 619 | CA PRO  | 38 | 6.604 | 14.330 | -3.963  | 1.00 | 0.00 |

|      |     |      |     |    |        |        |        |      |      |
|------|-----|------|-----|----|--------|--------|--------|------|------|
| ATOM | 620 | HA   | PRO | 38 | 6.413  | 15.183 | -3.312 | 1.00 | 0.00 |
| ATOM | 621 | C    | PRO | 38 | 8.012  | 14.412 | -4.498 | 1.00 | 0.00 |
| ATOM | 622 | O    | PRO | 38 | 8.725  | 13.424 | -4.546 | 1.00 | 0.00 |
| ATOM | 623 | N    | GLN | 39 | 8.437  | 15.601 | -4.915 | 1.00 | 0.00 |
| ATOM | 624 | H    | GLN | 39 | 7.808  | 16.390 | -4.899 | 1.00 | 0.00 |
| ATOM | 625 | CA   | GLN | 39 | 9.764  | 15.794 | -5.452 | 1.00 | 0.00 |
| ATOM | 626 | HA   | GLN | 39 | 9.921  | 15.133 | -6.305 | 1.00 | 0.00 |
| ATOM | 627 | CB   | GLN | 39 | 9.938  | 17.245 | -5.918 | 1.00 | 0.00 |
| ATOM | 628 | HB2  | GLN | 39 | 9.117  | 17.510 | -6.585 | 1.00 | 0.00 |
| ATOM | 629 | HB3  | GLN | 39 | 9.930  | 17.905 | -5.051 | 1.00 | 0.00 |
| ATOM | 630 | CG   | GLN | 39 | 11.269 | 17.396 | -6.662 | 1.00 | 0.00 |
| ATOM | 631 | HG2  | GLN | 39 | 11.400 | 16.566 | -7.357 | 1.00 | 0.00 |
| ATOM | 632 | HG3  | GLN | 39 | 11.231 | 18.333 | -7.218 | 1.00 | 0.00 |
| ATOM | 633 | CD   | GLN | 39 | 12.460 | 17.436 | -5.725 | 1.00 | 0.00 |
| ATOM | 634 | OE1  | GLN | 39 | 12.350 | 17.819 | -4.563 | 1.00 | 0.00 |
| ATOM | 635 | NE2  | GLN | 39 | 13.598 | 17.010 | -6.228 | 1.00 | 0.00 |
| ATOM | 636 | HE21 | GLN | 39 | 14.431 | 17.010 | -5.657 | 1.00 | 0.00 |
| ATOM | 637 | HE22 | GLN | 39 | 13.634 | 16.684 | -7.184 | 1.00 | 0.00 |
| ATOM | 638 | C    | GLN | 39 | 10.812 | 15.428 | -4.414 | 1.00 | 0.00 |
| ATOM | 639 | O    | GLN | 39 | 11.874 | 14.911 | -4.755 | 1.00 | 0.00 |
| ATOM | 640 | N    | GLN | 40 | 10.491 | 15.676 | -3.140 | 1.00 | 0.00 |
| ATOM | 641 | H    | GLN | 40 | 9.623  | 16.142 | -2.918 | 1.00 | 0.00 |

|      |     |      |     |    |        |        |        |      |      |
|------|-----|------|-----|----|--------|--------|--------|------|------|
| ATOM | 642 | CA   | GLN | 40 | 11.388 | 15.353 | -2.061 | 1.00 | 0.00 |
| ATOM | 643 | HA   | GLN | 40 | 12.423 | 15.450 | -2.390 | 1.00 | 0.00 |
| ATOM | 644 | CB   | GLN | 40 | 11.154 | 16.311 | -0.894 | 1.00 | 0.00 |
| ATOM | 645 | HB2  | GLN | 40 | 10.934 | 17.304 | -1.286 | 1.00 | 0.00 |
| ATOM | 646 | HB3  | GLN | 40 | 10.307 | 15.957 | -0.307 | 1.00 | 0.00 |
| ATOM | 647 | CG   | GLN | 40 | 12.401 | 16.378 | -0.003 | 1.00 | 0.00 |
| ATOM | 648 | HG2  | GLN | 40 | 13.228 | 15.960 | -0.578 | 1.00 | 0.00 |
| ATOM | 649 | HG3  | GLN | 40 | 12.632 | 17.408 | 0.269  | 1.00 | 0.00 |
| ATOM | 650 | CD   | GLN | 40 | 12.235 | 15.562 | 1.275  | 1.00 | 0.00 |
| ATOM | 651 | OE1  | GLN | 40 | 11.159 | 15.116 | 1.654  | 1.00 | 0.00 |
| ATOM | 652 | NE2  | GLN | 40 | 13.333 | 15.401 | 1.993  | 1.00 | 0.00 |
| ATOM | 653 | HE21 | GLN | 40 | 13.298 | 14.871 | 2.852  | 1.00 | 0.00 |
| ATOM | 654 | HE22 | GLN | 40 | 14.202 | 15.808 | 1.679  | 1.00 | 0.00 |
| ATOM | 655 | C    | GLN | 40 | 11.215 | 13.901 | -1.622 | 1.00 | 0.00 |
| ATOM | 656 | O    | GLN | 40 | 11.938 | 13.408 | -0.766 | 1.00 | 0.00 |
| ATOM | 657 | N    | GLY | 41 | 10.234 | 13.208 | -2.201 | 1.00 | 0.00 |
| ATOM | 658 | H    | GLY | 41 | 9.643  | 13.681 | -2.869 | 1.00 | 0.00 |
| ATOM | 659 | CA   | GLY | 41 | 9.973  | 11.816 | -1.922 | 1.00 | 0.00 |
| ATOM | 660 | HA2  | GLY | 41 | 10.905 | 11.330 | -1.634 | 1.00 | 0.00 |
| ATOM | 661 | HA3  | GLY | 41 | 9.258  | 11.745 | -1.103 | 1.00 | 0.00 |
| ATOM | 662 | C    | GLY | 41 | 9.404  | 11.110 | -3.135 | 1.00 | 0.00 |
| ATOM | 663 | O    | GLY | 41 | 8.280  | 10.651 | -3.130 | 1.00 | 0.00 |

|      |     |     |     |    |        |        |        |      |      |
|------|-----|-----|-----|----|--------|--------|--------|------|------|
| ATOM | 664 | N   | PRO | 42 | 10.157 | 11.040 | -4.232 | 1.00 | 0.00 |
| ATOM | 665 | CD  | PRO | 42 | 11.498 | 11.569 | -4.370 | 1.00 | 0.00 |
| ATOM | 666 | HD2 | PRO | 42 | 12.156 | 10.992 | -3.720 | 1.00 | 0.00 |
| ATOM | 667 | HD3 | PRO | 42 | 11.485 | 12.608 | -4.043 | 1.00 | 0.00 |
| ATOM | 668 | CG  | PRO | 42 | 11.861 | 11.428 | -5.845 | 1.00 | 0.00 |
| ATOM | 669 | HG2 | PRO | 42 | 12.711 | 10.751 | -5.939 | 1.00 | 0.00 |
| ATOM | 670 | HG3 | PRO | 42 | 12.132 | 12.407 | -6.239 | 1.00 | 0.00 |
| ATOM | 671 | CB  | PRO | 42 | 10.624 | 10.874 | -6.559 | 1.00 | 0.00 |
| ATOM | 672 | HB2 | PRO | 42 | 10.893 | 10.044 | -7.212 | 1.00 | 0.00 |
| ATOM | 673 | HB3 | PRO | 42 | 10.119 | 11.645 | -7.141 | 1.00 | 0.00 |
| ATOM | 674 | CA  | PRO | 42 | 9.707  | 10.380 | -5.444 | 1.00 | 0.00 |
| ATOM | 675 | HA  | PRO | 42 | 8.694  | 10.718 | -5.662 | 1.00 | 0.00 |
| ATOM | 676 | C   | PRO | 42 | 9.716  | 8.874  | -5.303 | 1.00 | 0.00 |
| ATOM | 677 | O   | PRO | 42 | 8.877  | 8.183  | -5.894 | 1.00 | 0.00 |
| ATOM | 678 | N   | SER | 43 | 10.651 | 8.376  | -4.501 | 1.00 | 0.00 |
| ATOM | 679 | H   | SER | 43 | 11.313 | 9.007  | -4.074 | 1.00 | 0.00 |
| ATOM | 680 | CA  | SER | 43 | 10.799 | 6.961  | -4.257 | 1.00 | 0.00 |
| ATOM | 681 | HA  | SER | 43 | 10.696 | 6.418  | -5.197 | 1.00 | 0.00 |
| ATOM | 682 | CB  | SER | 43 | 12.171 | 6.642  | -3.656 | 1.00 | 0.00 |
| ATOM | 683 | HB2 | SER | 43 | 12.069 | 6.589  | -2.572 | 1.00 | 0.00 |
| ATOM | 684 | HB3 | SER | 43 | 12.498 | 5.674  | -4.037 | 1.00 | 0.00 |
| ATOM | 685 | OG  | SER | 43 | 13.132 | 7.633  | -3.994 | 1.00 | 0.00 |

|      |     |      |     |    |        |       |        |      |      |
|------|-----|------|-----|----|--------|-------|--------|------|------|
| ATOM | 686 | HG   | SER | 43 | 13.978 | 7.404 | -3.603 | 1.00 | 0.00 |
| ATOM | 687 | C    | SER | 43 | 9.683  | 6.481 | -3.336 | 1.00 | 0.00 |
| ATOM | 688 | O    | SER | 43 | 9.892  | 6.170 | -2.170 | 1.00 | 0.00 |
| ATOM | 689 | N    | LEU | 44 | 8.456  | 6.436 | -3.853 | 1.00 | 0.00 |
| ATOM | 690 | H    | LEU | 44 | 8.313  | 6.744 | -4.804 | 1.00 | 0.00 |
| ATOM | 691 | CA   | LEU | 44 | 7.311  | 6.013 | -3.095 | 1.00 | 0.00 |
| ATOM | 692 | HA   | LEU | 44 | 7.635  | 5.549 | -2.163 | 1.00 | 0.00 |
| ATOM | 693 | CB   | LEU | 44 | 6.421  | 7.210 | -2.762 | 1.00 | 0.00 |
| ATOM | 694 | HB2  | LEU | 44 | 6.639  | 7.956 | -3.526 | 1.00 | 0.00 |
| ATOM | 695 | HB3  | LEU | 44 | 5.377  | 6.906 | -2.839 | 1.00 | 0.00 |
| ATOM | 696 | CG   | LEU | 44 | 6.679  | 7.812 | -1.370 | 1.00 | 0.00 |
| ATOM | 697 | HG   | LEU | 44 | 7.670  | 7.507 | -1.035 | 1.00 | 0.00 |
| ATOM | 698 | CD1  | LEU | 44 | 6.603  | 9.320 | -1.410 | 1.00 | 0.00 |
| ATOM | 699 | HD11 | LEU | 44 | 5.612  | 9.625 | -1.745 | 1.00 | 0.00 |
| ATOM | 700 | HD12 | LEU | 44 | 6.789  | 9.720 | -0.414 | 1.00 | 0.00 |
| ATOM | 701 | HD13 | LEU | 44 | 7.353  | 9.704 | -2.101 | 1.00 | 0.00 |
| ATOM | 702 | CD2  | LEU | 44 | 5.692  | 7.284 | -0.351 | 1.00 | 0.00 |
| ATOM | 703 | HD21 | LEU | 44 | 5.785  | 6.200 | -0.282 | 1.00 | 0.00 |
| ATOM | 704 | HD22 | LEU | 44 | 5.901  | 7.728 | 0.622  | 1.00 | 0.00 |
| ATOM | 705 | HD23 | LEU | 44 | 4.679  | 7.542 | -0.658 | 1.00 | 0.00 |
| ATOM | 706 | C    | LEU | 44 | 6.583  | 4.986 | -3.901 | 1.00 | 0.00 |
| ATOM | 707 | O    | LEU | 44 | 6.169  | 4.018 | -3.335 | 1.00 | 0.00 |

|      |     |      |     |    |       |       |        |      |      |
|------|-----|------|-----|----|-------|-------|--------|------|------|
| ATOM | 708 | N    | ARG | 45 | 6.419 | 5.158 | -5.208 | 1.00 | 0.00 |
| ATOM | 709 | H    | ARG | 45 | 6.788 | 5.999 | -5.627 | 1.00 | 0.00 |
| ATOM | 710 | CA   | ARG | 45 | 5.745 | 4.207 | -6.061 | 1.00 | 0.00 |
| ATOM | 711 | HA   | ARG | 45 | 4.732 | 4.038 | -5.695 | 1.00 | 0.00 |
| ATOM | 712 | CB   | ARG | 45 | 5.665 | 4.728 | -7.492 | 1.00 | 0.00 |
| ATOM | 713 | HB2  | ARG | 45 | 6.667 | 5.009 | -7.817 | 1.00 | 0.00 |
| ATOM | 714 | HB3  | ARG | 45 | 5.287 | 3.930 | -8.132 | 1.00 | 0.00 |
| ATOM | 715 | CG   | ARG | 45 | 4.742 | 5.937 | -7.588 | 1.00 | 0.00 |
| ATOM | 716 | HG2  | ARG | 45 | 5.251 | 6.795 | -7.149 | 1.00 | 0.00 |
| ATOM | 717 | HG3  | ARG | 45 | 4.541 | 6.134 | -8.641 | 1.00 | 0.00 |
| ATOM | 718 | CD   | ARG | 45 | 3.414 | 5.696 | -6.849 | 1.00 | 0.00 |
| ATOM | 719 | HD2  | ARG | 45 | 3.182 | 4.631 | -6.850 | 1.00 | 0.00 |
| ATOM | 720 | HD3  | ARG | 45 | 3.497 | 6.048 | -5.821 | 1.00 | 0.00 |
| ATOM | 721 | NE   | ARG | 45 | 2.315 | 6.418 | -7.507 | 1.00 | 0.00 |
| ATOM | 722 | HE   | ARG | 45 | 1.576 | 5.855 | -7.904 | 1.00 | 0.00 |
| ATOM | 723 | CZ   | ARG | 45 | 2.213 | 7.732 | -7.579 | 1.00 | 0.00 |
| ATOM | 724 | NH1  | ARG | 45 | 3.118 | 8.506 | -7.017 | 1.00 | 0.00 |
| ATOM | 725 | HH11 | ARG | 45 | 3.898 | 8.092 | -6.526 | 1.00 | 0.00 |
| ATOM | 726 | HH12 | ARG | 45 | 3.028 | 9.510 | -7.080 | 1.00 | 0.00 |
| ATOM | 727 | NH2  | ARG | 45 | 1.225 | 8.279 | -8.248 | 1.00 | 0.00 |
| ATOM | 728 | HH21 | ARG | 45 | 0.544 | 7.691 | -8.707 | 1.00 | 0.00 |
| ATOM | 729 | HH22 | ARG | 45 | 1.151 | 9.285 | -8.301 | 1.00 | 0.00 |

|      |     |     |     |    |        |        |         |      |      |
|------|-----|-----|-----|----|--------|--------|---------|------|------|
| ATOM | 730 | C   | ARG | 45 | 6.478  | 2.908  | -6.080  | 1.00 | 0.00 |
| ATOM | 731 | O   | ARG | 45 | 6.001  | 1.958  | -5.533  | 1.00 | 0.00 |
| ATOM | 732 | N   | GLU | 46 | 7.679  | 2.871  | -6.620  | 1.00 | 0.00 |
| ATOM | 733 | H   | GLU | 46 | 8.057  | 3.711  | -7.033  | 1.00 | 0.00 |
| ATOM | 734 | CA  | GLU | 46 | 8.474  | 1.655  | -6.681  | 1.00 | 0.00 |
| ATOM | 735 | HA  | GLU | 46 | 7.960  | 0.905  | -7.282  | 1.00 | 0.00 |
| ATOM | 736 | CB  | GLU | 46 | 9.838  | 1.944  | -7.319  | 1.00 | 0.00 |
| ATOM | 737 | HB2 | GLU | 46 | 10.304 | 2.776  | -6.792  | 1.00 | 0.00 |
| ATOM | 738 | HB3 | GLU | 46 | 10.466 | 1.058  | -7.224  | 1.00 | 0.00 |
| ATOM | 739 | CG  | GLU | 46 | 9.680  | 2.302  | -8.802  | 1.00 | 0.00 |
| ATOM | 740 | HG2 | GLU | 46 | 9.442  | 1.385  | -9.342  | 1.00 | 0.00 |
| ATOM | 741 | HG3 | GLU | 46 | 8.866  | 3.016  | -8.925  | 1.00 | 0.00 |
| ATOM | 742 | CD  | GLU | 46 | 10.971 | 2.900  | -9.358  | 1.00 | 0.00 |
| ATOM | 743 | OE1 | GLU | 46 | 11.473 | 3.860  | -8.728  | 1.00 | 0.00 |
| ATOM | 744 | OE2 | GLU | 46 | 11.423 | 2.409  | -10.412 | 1.00 | 0.00 |
| ATOM | 745 | C   | GLU | 46 | 8.667  | 1.068  | -5.283  | 1.00 | 0.00 |
| ATOM | 746 | O   | GLU | 46 | 8.946  | -0.119 | -5.142  | 1.00 | 0.00 |
| ATOM | 747 | N   | GLN | 47 | 8.482  | 1.904  | -4.249  | 1.00 | 0.00 |
| ATOM | 748 | H   | GLN | 47 | 8.303  | 2.880  | -4.434  | 1.00 | 0.00 |
| ATOM | 749 | CA  | GLN | 47 | 8.581  | 1.480  | -2.889  | 1.00 | 0.00 |
| ATOM | 750 | HA  | GLN | 47 | 9.347  | 0.710  | -2.795  | 1.00 | 0.00 |
| ATOM | 751 | CB  | GLN | 47 | 8.959  | 2.654  | -1.996  | 1.00 | 0.00 |



|      |     |      |     |    |        |        |        |      |      |
|------|-----|------|-----|----|--------|--------|--------|------|------|
| ATOM | 752 | HB2  | GLN | 47 | 8.912  | 3.574  | -2.578 | 1.00 | 0.00 |
| ATOM | 753 | HB3  | GLN | 47 | 8.254  | 2.712  | -1.167 | 1.00 | 0.00 |
| ATOM | 754 | CG   | GLN | 47 | 10.379 | 2.469  | -1.447 | 1.00 | 0.00 |
| ATOM | 755 | HG2  | GLN | 47 | 10.457 | 1.487  | -0.979 | 1.00 | 0.00 |
| ATOM | 756 | HG3  | GLN | 47 | 11.109 | 2.545  | -2.253 | 1.00 | 0.00 |
| ATOM | 757 | CD   | GLN | 47 | 10.694 | 3.531  | -0.404 | 1.00 | 0.00 |
| ATOM | 758 | OE1  | GLN | 47 | 11.653 | 4.280  | -0.505 | 1.00 | 0.00 |
| ATOM | 759 | NE2  | GLN | 47 | 9.868  | 3.582  | 0.630  | 1.00 | 0.00 |
| ATOM | 760 | HE21 | GLN | 47 | 10.019 | 4.263  | 1.360  | 1.00 | 0.00 |
| ATOM | 761 | HE22 | GLN | 47 | 9.091  | 2.939  | 0.684  | 1.00 | 0.00 |
| ATOM | 762 | C    | GLN | 47 | 7.293  | 0.867  | -2.433 | 1.00 | 0.00 |
| ATOM | 763 | O    | GLN | 47 | 7.343  | -0.231 | -1.967 | 1.00 | 0.00 |
| ATOM | 764 | N    | CYX | 48 | 6.158  | 1.523  | -2.570 | 1.00 | 0.00 |
| ATOM | 765 | H    | CYX | 48 | 6.247  | 2.451  | -2.958 | 1.00 | 0.00 |
| ATOM | 766 | CA   | CYX | 48 | 4.858  | 1.069  | -2.193 | 1.00 | 0.00 |
| ATOM | 767 | HA   | CYX | 48 | 4.898  | 0.708  | -1.165 | 1.00 | 0.00 |
| ATOM | 768 | CB   | CYX | 48 | 3.806  | 2.164  | -2.283 | 1.00 | 0.00 |
| ATOM | 769 | HB2  | CYX | 48 | 3.503  | 2.460  | -1.279 | 1.00 | 0.00 |
| ATOM | 770 | HB3  | CYX | 48 | 4.221  | 3.025  | -2.806 | 1.00 | 0.00 |
| ATOM | 771 | SG   | CYX | 48 | 2.271  | 1.734  | -3.140 | 1.00 | 0.00 |
| ATOM | 772 | C    | CYX | 48 | 4.482  | -0.076 | -3.075 | 1.00 | 0.00 |
| ATOM | 773 | O    | CYX | 48 | 4.024  | -1.081 | -2.607 | 1.00 | 0.00 |

|      |     |      |     |    |       |        |        |      |      |
|------|-----|------|-----|----|-------|--------|--------|------|------|
| ATOM | 774 | N    | CYX | 49 | 4.711 | 0.011  | -4.377 | 1.00 | 0.00 |
| ATOM | 775 | H    | CYX | 49 | 5.071 | 0.893  | -4.711 | 1.00 | 0.00 |
| ATOM | 776 | CA   | CYX | 49 | 4.441 | -1.024 | -5.340 | 1.00 | 0.00 |
| ATOM | 777 | HA   | CYX | 49 | 3.363 | -1.163 | -5.418 | 1.00 | 0.00 |
| ATOM | 778 | CB   | CYX | 49 | 4.993 | -0.680 | -6.730 | 1.00 | 0.00 |
| ATOM | 779 | HB2  | CYX | 49 | 6.074 | -0.553 | -6.671 | 1.00 | 0.00 |
| ATOM | 780 | HB3  | CYX | 49 | 4.761 | -1.488 | -7.424 | 1.00 | 0.00 |
| ATOM | 781 | SG   | CYX | 49 | 4.372 | 0.851  | -7.483 | 1.00 | 0.00 |
| ATOM | 782 | C    | CYX | 49 | 5.047 | -2.324 | -4.821 | 1.00 | 0.00 |
| ATOM | 783 | O    | CYX | 49 | 4.597 | -3.398 | -5.191 | 1.00 | 0.00 |
| ATOM | 784 | N    | ASN | 50 | 6.079 | -2.228 | -3.970 | 1.00 | 0.00 |
| ATOM | 785 | H    | ASN | 50 | 6.451 | -1.312 | -3.765 | 1.00 | 0.00 |
| ATOM | 786 | CA   | ASN | 50 | 6.667 | -3.357 | -3.325 | 1.00 | 0.00 |
| ATOM | 787 | HA   | ASN | 50 | 6.402 | -4.276 | -3.848 | 1.00 | 0.00 |
| ATOM | 788 | CB   | ASN | 50 | 8.183 | -3.208 | -3.341 | 1.00 | 0.00 |
| ATOM | 789 | HB2  | ASN | 50 | 8.465 | -2.191 | -3.614 | 1.00 | 0.00 |
| ATOM | 790 | HB3  | ASN | 50 | 8.567 | -3.437 | -2.347 | 1.00 | 0.00 |
| ATOM | 791 | CG   | ASN | 50 | 8.807 | -4.164 | -4.331 | 1.00 | 0.00 |
| ATOM | 792 | OD1  | ASN | 50 | 9.375 | -5.188 | -3.983 | 1.00 | 0.00 |
| ATOM | 793 | ND2  | ASN | 50 | 8.675 | -3.828 | -5.601 | 1.00 | 0.00 |
| ATOM | 794 | HD21 | ASN | 50 | 9.067 | -4.420 | -6.320 | 1.00 | 0.00 |
| ATOM | 795 | HD22 | ASN | 50 | 8.183 | -2.982 | -5.848 | 1.00 | 0.00 |

|      |     |     |     |    |       |        |        |      |      |
|------|-----|-----|-----|----|-------|--------|--------|------|------|
| ATOM | 796 | C   | ASN | 50 | 6.226 | -3.459 | -1.896 | 1.00 | 0.00 |
| ATOM | 797 | O   | ASN | 50 | 5.988 | -4.538 | -1.444 | 1.00 | 0.00 |
| ATOM | 798 | N   | GLU | 51 | 6.113 | -2.370 | -1.167 | 1.00 | 0.00 |
| ATOM | 799 | H   | GLU | 51 | 6.409 | -1.514 | -1.612 | 1.00 | 0.00 |
| ATOM | 800 | CA  | GLU | 51 | 5.697 | -2.315 | 0.206  | 1.00 | 0.00 |
| ATOM | 801 | HA  | GLU | 51 | 6.279 | -3.032 | 0.785  | 1.00 | 0.00 |
| ATOM | 802 | CB  | GLU | 51 | 5.901 | -0.919 | 0.806  | 1.00 | 0.00 |
| ATOM | 803 | HB2 | GLU | 51 | 6.474 | -1.019 | 1.728  | 1.00 | 0.00 |
| ATOM | 804 | HB3 | GLU | 51 | 6.462 | -0.315 | 0.093  | 1.00 | 0.00 |
| ATOM | 805 | CG  | GLU | 51 | 4.566 | -0.242 | 1.108  | 1.00 | 0.00 |
| ATOM | 806 | HG2 | GLU | 51 | 4.023 | -0.254 | 0.162  | 1.00 | 0.00 |
| ATOM | 807 | HG3 | GLU | 51 | 3.985 | -0.767 | 1.866  | 1.00 | 0.00 |
| ATOM | 808 | CD  | GLU | 51 | 4.783 | 1.162  | 1.536  | 1.00 | 0.00 |
| ATOM | 809 | OE1 | GLU | 51 | 5.048 | 1.462  | 2.717  | 1.00 | 0.00 |
| ATOM | 810 | OE2 | GLU | 51 | 4.589 | 2.002  | 0.665  | 1.00 | 0.00 |
| ATOM | 811 | C   | GLU | 51 | 4.244 | -2.773 | 0.325  | 1.00 | 0.00 |
| ATOM | 812 | O   | GLU | 51 | 3.747 | -3.000 | 1.418  | 1.00 | 0.00 |
| ATOM | 813 | N   | LEU | 52 | 3.550 | -2.898 | -0.800 | 1.00 | 0.00 |
| ATOM | 814 | H   | LEU | 52 | 3.985 | -2.584 | -1.656 | 1.00 | 0.00 |
| ATOM | 815 | CA  | LEU | 52 | 2.182 | -3.310 | -0.846 | 1.00 | 0.00 |
| ATOM | 816 | HA  | LEU | 52 | 1.758 | -3.318 | 0.158  | 1.00 | 0.00 |
| ATOM | 817 | CB  | LEU | 52 | 1.374 | -2.332 | -1.712 | 1.00 | 0.00 |

|      |     |          |    |        |        |        |      |      |
|------|-----|----------|----|--------|--------|--------|------|------|
| ATOM | 818 | HB2 LEU  | 52 | 0.494  | -2.162 | -1.092 | 1.00 | 0.00 |
| ATOM | 819 | HB3 LEU  | 52 | 1.920  | -1.396 | -1.831 | 1.00 | 0.00 |
| ATOM | 820 | CG LEU   | 52 | 0.938  | -2.847 | -3.088 | 1.00 | 0.00 |
| ATOM | 821 | HG LEU   | 52 | 0.571  | -1.998 | -3.665 | 1.00 | 0.00 |
| ATOM | 822 | CD1 LEU  | 52 | 2.067  | -3.514 | -3.837 | 1.00 | 0.00 |
| ATOM | 823 | HD11 LEU | 52 | 2.434  | -4.364 | -3.261 | 1.00 | 0.00 |
| ATOM | 824 | HD12 LEU | 52 | 1.706  | -3.861 | -4.805 | 1.00 | 0.00 |
| ATOM | 825 | HD13 LEU | 52 | 2.877  | -2.800 | -3.986 | 1.00 | 0.00 |
| ATOM | 826 | CD2 LEU  | 52 | -0.262 | -3.760 | -2.964 | 1.00 | 0.00 |
| ATOM | 827 | HD21 LEU | 52 | -1.091 | -3.213 | -2.515 | 1.00 | 0.00 |
| ATOM | 828 | HD22 LEU | 52 | -0.554 | -4.114 | -3.953 | 1.00 | 0.00 |
| ATOM | 829 | HD23 LEU | 52 | -0.007 | -4.613 | -2.335 | 1.00 | 0.00 |
| ATOM | 830 | C LEU    | 52 | 2.131  | -4.766 | -1.278 | 1.00 | 0.00 |
| ATOM | 831 | O LEU    | 52 | 1.137  | -5.426 | -1.032 | 1.00 | 0.00 |
| ATOM | 832 | N TYR    | 53 | 3.190  | -5.247 | -1.940 | 1.00 | 0.00 |
| ATOM | 833 | H TYR    | 53 | 4.007  | -4.660 | -2.021 | 1.00 | 0.00 |
| ATOM | 834 | CA TYR   | 53 | 3.240  | -6.560 | -2.505 | 1.00 | 0.00 |
| ATOM | 835 | HA TYR   | 53 | 2.235  | -6.953 | -2.658 | 1.00 | 0.00 |
| ATOM | 836 | CB TYR   | 53 | 3.945  | -6.481 | -3.859 | 1.00 | 0.00 |
| ATOM | 837 | HB2 TYR  | 53 | 3.470  | -5.675 | -4.418 | 1.00 | 0.00 |
| ATOM | 838 | HB3 TYR  | 53 | 4.986  | -6.224 | -3.665 | 1.00 | 0.00 |
| ATOM | 839 | CG TYR   | 53 | 3.883  | -7.760 | -4.669 | 1.00 | 0.00 |

|      |     |         |    |       |         |        |      |      |
|------|-----|---------|----|-------|---------|--------|------|------|
| ATOM | 840 | CD1 TYR | 53 | 2.644 | -8.303  | -5.040 | 1.00 | 0.00 |
| ATOM | 841 | HD1 TYR | 53 | 1.731 | -7.792  | -4.735 | 1.00 | 0.00 |
| ATOM | 842 | CE1 TYR | 53 | 2.568 | -9.485  | -5.791 | 1.00 | 0.00 |
| ATOM | 843 | HE1 TYR | 53 | 1.604 | -9.895  | -6.093 | 1.00 | 0.00 |
| ATOM | 844 | CZ TYR  | 53 | 3.758 | -10.136 | -6.166 | 1.00 | 0.00 |
| ATOM | 845 | OH TYR  | 53 | 3.701 | -11.292 | -6.876 | 1.00 | 0.00 |
| ATOM | 846 | HH TYR  | 53 | 2.802 | -11.572 | -7.066 | 1.00 | 0.00 |
| ATOM | 847 | CE2 TYR | 53 | 5.010 | -9.603  | -5.798 | 1.00 | 0.00 |
| ATOM | 848 | HE2 TYR | 53 | 5.931 | -10.109 | -6.089 | 1.00 | 0.00 |
| ATOM | 849 | CD2 TYR | 53 | 5.067 | -8.411  | -5.050 | 1.00 | 0.00 |
| ATOM | 850 | HD2 TYR | 53 | 6.032 | -7.992  | -4.766 | 1.00 | 0.00 |
| ATOM | 851 | C TYR   | 53 | 4.038 | -7.440  | -1.596 | 1.00 | 0.00 |
| ATOM | 852 | O TYR   | 53 | 3.825 | -8.632  | -1.558 | 1.00 | 0.00 |
| ATOM | 853 | N GLN   | 54 | 4.994 | -6.877  | -0.869 | 1.00 | 0.00 |
| ATOM | 854 | H GLN   | 54 | 5.144 | -5.887  | -1.003 | 1.00 | 0.00 |
| ATOM | 855 | CA GLN  | 54 | 5.848 | -7.577  | 0.049  | 1.00 | 0.00 |
| ATOM | 856 | HA GLN  | 54 | 6.474 | -8.279  | -0.502 | 1.00 | 0.00 |
| ATOM | 857 | CB GLN  | 54 | 6.756 | -6.607  | 0.815  | 1.00 | 0.00 |
| ATOM | 858 | HB2 GLN | 54 | 7.313 | -7.175  | 1.560  | 1.00 | 0.00 |
| ATOM | 859 | HB3 GLN | 54 | 7.452 | -6.157  | 0.107  | 1.00 | 0.00 |
| ATOM | 860 | CG GLN  | 54 | 5.951 | -5.507  | 1.509  | 1.00 | 0.00 |
| ATOM | 861 | HG2 GLN | 54 | 5.471 | -4.858  | 0.776  | 1.00 | 0.00 |

|      |     |      |     |    |       |        |       |      |      |
|------|-----|------|-----|----|-------|--------|-------|------|------|
| ATOM | 862 | HG3  | GLN | 54 | 5.188 | -5.995 | 2.116 | 1.00 | 0.00 |
| ATOM | 863 | CD   | GLN | 54 | 6.818 | -4.658 | 2.413 | 1.00 | 0.00 |
| ATOM | 864 | OE1  | GLN | 54 | 7.984 | -4.389 | 2.139 | 1.00 | 0.00 |
| ATOM | 865 | NE2  | GLN | 54 | 6.233 | -4.188 | 3.492 | 1.00 | 0.00 |
| ATOM | 866 | HE21 | GLN | 54 | 6.757 | -3.614 | 4.137 | 1.00 | 0.00 |
| ATOM | 867 | HE22 | GLN | 54 | 5.262 | -4.403 | 3.671 | 1.00 | 0.00 |
| ATOM | 868 | C    | GLN | 54 | 4.998 | -8.382 | 1.020 | 1.00 | 0.00 |
| ATOM | 869 | O    | GLN | 54 | 5.445 | -9.408 | 1.517 | 1.00 | 0.00 |
| ATOM | 870 | N    | GLU | 55 | 3.763 | -7.924 | 1.255 | 1.00 | 0.00 |
| ATOM | 871 | H    | GLU | 55 | 3.492 | -7.028 | 0.875 | 1.00 | 0.00 |
| ATOM | 872 | CA   | GLU | 55 | 2.835 | -8.610 | 2.108 | 1.00 | 0.00 |
| ATOM | 873 | HA   | GLU | 55 | 3.373 | -9.126 | 2.903 | 1.00 | 0.00 |
| ATOM | 874 | CB   | GLU | 55 | 1.871 | -7.622 | 2.737 | 1.00 | 0.00 |
| ATOM | 875 | HB2  | GLU | 55 | 1.173 | -7.287 | 1.969 | 1.00 | 0.00 |
| ATOM | 876 | HB3  | GLU | 55 | 1.322 | -8.134 | 3.527 | 1.00 | 0.00 |
| ATOM | 877 | CG   | GLU | 55 | 2.598 | -6.420 | 3.321 | 1.00 | 0.00 |
| ATOM | 878 | HG2  | GLU | 55 | 3.529 | -6.815 | 3.726 | 1.00 | 0.00 |
| ATOM | 879 | HG3  | GLU | 55 | 2.822 | -5.671 | 2.562 | 1.00 | 0.00 |
| ATOM | 880 | CD   | GLU | 55 | 1.794 | -5.787 | 4.432 | 1.00 | 0.00 |
| ATOM | 881 | OE1  | GLU | 55 | 0.854 | -6.410 | 4.959 | 1.00 | 0.00 |
| ATOM | 882 | OE2  | GLU | 55 | 2.108 | -4.622 | 4.678 | 1.00 | 0.00 |
| ATOM | 883 | C    | GLU | 55 | 2.108 | -9.705 | 1.359 | 1.00 | 0.00 |

|      |     |     |     |    |        |         |        |      |      |
|------|-----|-----|-----|----|--------|---------|--------|------|------|
| ATOM | 884 | O   | GLU | 55 | 1.072  | -10.165 | 1.797  | 1.00 | 0.00 |
| ATOM | 885 | N   | ASP | 56 | 2.641  | -10.153 | 0.233  | 1.00 | 0.00 |
| ATOM | 886 | H   | ASP | 56 | 3.530  | -9.756  | -0.035 | 1.00 | 0.00 |
| ATOM | 887 | CA  | ASP | 56 | 2.054  | -11.143 | -0.622 | 1.00 | 0.00 |
| ATOM | 888 | HA  | ASP | 56 | 2.805  | -11.562 | -1.292 | 1.00 | 0.00 |
| ATOM | 889 | CB  | ASP | 56 | 1.479  | -12.275 | 0.237  | 1.00 | 0.00 |
| ATOM | 890 | HB2 | ASP | 56 | 2.169  | -12.307 | 1.080  | 1.00 | 0.00 |
| ATOM | 891 | HB3 | ASP | 56 | 0.481  | -12.020 | 0.593  | 1.00 | 0.00 |
| ATOM | 892 | CG  | ASP | 56 | 1.442  | -13.627 | -0.434 | 1.00 | 0.00 |
| ATOM | 893 | OD1 | ASP | 56 | 1.876  | -13.714 | -1.603 | 1.00 | 0.00 |
| ATOM | 894 | OD2 | ASP | 56 | 0.887  | -14.558 | 0.184  | 1.00 | 0.00 |
| ATOM | 895 | C   | ASP | 56 | 0.940  | -10.524 | -1.454 | 1.00 | 0.00 |
| ATOM | 896 | O   | ASP | 56 | 0.714  | -9.307  | -1.481 | 1.00 | 0.00 |
| ATOM | 897 | N   | GLN | 57 | 0.176  | -11.383 | -2.140 | 1.00 | 0.00 |
| ATOM | 898 | H   | GLN | 57 | 0.406  | -12.367 | -2.132 | 1.00 | 0.00 |
| ATOM | 899 | CA  | GLN | 57 | -0.940 | -10.949 | -2.942 | 1.00 | 0.00 |
| ATOM | 900 | HA  | GLN | 57 | -0.770 | -9.934  | -3.301 | 1.00 | 0.00 |
| ATOM | 901 | CB  | GLN | 57 | -1.107 | -11.873 | -4.149 | 1.00 | 0.00 |
| ATOM | 902 | HB2 | GLN | 57 | -0.187 | -12.439 | -4.294 | 1.00 | 0.00 |
| ATOM | 903 | HB3 | GLN | 57 | -1.930 | -12.562 | -3.959 | 1.00 | 0.00 |
| ATOM | 904 | CG  | GLN | 57 | -1.406 | -11.058 | -5.406 | 1.00 | 0.00 |
| ATOM | 905 | HG2 | GLN | 57 | -0.797 | -10.154 | -5.389 | 1.00 | 0.00 |

|      |     |      |     |    |        |         |        |      |      |
|------|-----|------|-----|----|--------|---------|--------|------|------|
| ATOM | 906 | HG3  | GLN | 57 | -1.175 | -11.635 | -6.302 | 1.00 | 0.00 |
| ATOM | 907 | CD   | GLN | 57 | -2.860 | -10.659 | -5.452 | 1.00 | 0.00 |
| ATOM | 908 | OE1  | GLN | 57 | -3.751 | -11.457 | -5.596 | 1.00 | 0.00 |
| ATOM | 909 | NE2  | GLN | 57 | -3.128 | -9.386  | -5.352 | 1.00 | 0.00 |
| ATOM | 910 | HE21 | GLN | 57 | -4.088 | -9.072  | -5.378 | 1.00 | 0.00 |
| ATOM | 911 | HE22 | GLN | 57 | -2.375 | -8.721  | -5.249 | 1.00 | 0.00 |
| ATOM | 912 | C    | GLN | 57 | -2.216 | -10.908 | -2.128 | 1.00 | 0.00 |
| ATOM | 913 | O    | GLN | 57 | -3.147 | -10.166 | -2.421 | 1.00 | 0.00 |
| ATOM | 914 | N    | VAL | 58 | -2.256 | -11.684 | -1.053 | 1.00 | 0.00 |
| ATOM | 915 | H    | VAL | 58 | -1.478 | -12.304 | -0.879 | 1.00 | 0.00 |
| ATOM | 916 | CA   | VAL | 58 | -3.400 | -11.751 | -0.164 | 1.00 | 0.00 |
| ATOM | 917 | HA   | VAL | 58 | -4.338 | -11.741 | -0.719 | 1.00 | 0.00 |
| ATOM | 918 | CB   | VAL | 58 | -3.348 | -13.026 | 0.687  | 1.00 | 0.00 |
| ATOM | 919 | HB   | VAL | 58 | -3.009 | -12.772 | 1.691  | 1.00 | 0.00 |
| ATOM | 920 | CG1  | VAL | 58 | -4.737 | -13.667 | 0.764  | 1.00 | 0.00 |
| ATOM | 921 | HG11 | VAL | 58 | -5.076 | -13.922 | -0.240 | 1.00 | 0.00 |
| ATOM | 922 | HG12 | VAL | 58 | -4.687 | -14.572 | 1.371  | 1.00 | 0.00 |
| ATOM | 923 | HG13 | VAL | 58 | -5.437 | -12.965 | 1.216  | 1.00 | 0.00 |
| ATOM | 924 | CG2  | VAL | 58 | -2.341 | -14.035 | 0.125  | 1.00 | 0.00 |
| ATOM | 925 | HG21 | VAL | 58 | -1.347 | -13.589 | 0.112  | 1.00 | 0.00 |
| ATOM | 926 | HG22 | VAL | 58 | -2.330 | -14.927 | 0.752  | 1.00 | 0.00 |
| ATOM | 927 | HG23 | VAL | 58 | -2.629 | -14.310 | -0.890 | 1.00 | 0.00 |



|      |     |      |     |    |        |         |        |      |      |
|------|-----|------|-----|----|--------|---------|--------|------|------|
| ATOM | 928 | C    | VAL | 58 | -3.445 | -10.491 | 0.679  | 1.00 | 0.00 |
| ATOM | 929 | O    | VAL | 58 | -4.388 | -10.316 | 1.448  | 1.00 | 0.00 |
| ATOM | 930 | N    | CYX | 59 | -2.460 | -9.605  | 0.503  | 1.00 | 0.00 |
| ATOM | 931 | H    | CYX | 59 | -1.721 | -9.827  | -0.148 | 1.00 | 0.00 |
| ATOM | 932 | CA   | CYX | 59 | -2.385 | -8.368  | 1.219  | 1.00 | 0.00 |
| ATOM | 933 | HA   | CYX | 59 | -3.215 | -8.301  | 1.922  | 1.00 | 0.00 |
| ATOM | 934 | CB   | CYX | 59 | -1.095 | -8.272  | 1.988  | 1.00 | 0.00 |
| ATOM | 935 | HB2  | CYX | 59 | -0.275 | -8.636  | 1.369  | 1.00 | 0.00 |
| ATOM | 936 | HB3  | CYX | 59 | -0.910 | -7.233  | 2.261  | 1.00 | 0.00 |
| ATOM | 937 | SG   | CYX | 59 | -1.019 | -9.246  | 3.535  | 1.00 | 0.00 |
| ATOM | 938 | C    | CYX | 59 | -2.496 | -7.218  | 0.249  | 1.00 | 0.00 |
| ATOM | 939 | O    | CYX | 59 | -3.081 | -6.181  | 0.577  | 1.00 | 0.00 |
| ATOM | 940 | N    | VAL | 60 | -2.053 | -7.429  | -0.999 | 1.00 | 0.00 |
| ATOM | 941 | H    | VAL | 60 | -1.585 | -8.298  | -1.213 | 1.00 | 0.00 |
| ATOM | 942 | CA   | VAL | 60 | -2.155 | -6.432  | -2.040 | 1.00 | 0.00 |
| ATOM | 943 | HA   | VAL | 60 | -1.539 | -5.551  | -1.864 | 1.00 | 0.00 |
| ATOM | 944 | CB   | VAL | 60 | -1.764 | -7.039  | -3.382 | 1.00 | 0.00 |
| ATOM | 945 | HB   | VAL | 60 | -2.117 | -8.070  | -3.417 | 1.00 | 0.00 |
| ATOM | 946 | CG1  | VAL | 60 | -2.377 | -6.253  | -4.536 | 1.00 | 0.00 |
| ATOM | 947 | HG11 | VAL | 60 | -2.024 | -5.223  | -4.503 | 1.00 | 0.00 |
| ATOM | 948 | HG12 | VAL | 60 | -2.083 | -6.707  | -5.482 | 1.00 | 0.00 |
| ATOM | 949 | HG13 | VAL | 60 | -3.464 | -6.268  | -4.449 | 1.00 | 0.00 |

|      |     |          |    |         |        |        |      |      |
|------|-----|----------|----|---------|--------|--------|------|------|
| ATOM | 950 | CG2 VAL  | 60 | -0.260  | -7.136 | -3.518 | 1.00 | 0.00 |
| ATOM | 951 | HG21 VAL | 60 | 0.137   | -7.766 | -2.722 | 1.00 | 0.00 |
| ATOM | 952 | HG22 VAL | 60 | -0.010  | -7.573 | -4.485 | 1.00 | 0.00 |
| ATOM | 953 | HG23 VAL | 60 | 0.177   | -6.140 | -3.446 | 1.00 | 0.00 |
| ATOM | 954 | C VAL    | 60 | -3.555  | -5.863 | -2.070 | 1.00 | 0.00 |
| ATOM | 955 | O VAL    | 60 | -3.753  | -4.738 | -2.495 | 1.00 | 0.00 |
| ATOM | 956 | N CYX    | 61 | -4.547  | -6.638 | -1.639 | 1.00 | 0.00 |
| ATOM | 957 | H CYX    | 61 | -4.328  | -7.602 | -1.430 | 1.00 | 0.00 |
| ATOM | 958 | CA CYX   | 61 | -5.894  | -6.216 | -1.528 | 1.00 | 0.00 |
| ATOM | 959 | HA CYX   | 61 | -5.997  | -5.490 | -0.722 | 1.00 | 0.00 |
| ATOM | 960 | CB CYX   | 61 | -6.331  | -5.562 | -2.831 | 1.00 | 0.00 |
| ATOM | 961 | HB2 CYX  | 61 | -5.566  | -5.719 | -3.591 | 1.00 | 0.00 |
| ATOM | 962 | HB3 CYX  | 61 | -7.269  | -6.006 | -3.164 | 1.00 | 0.00 |
| ATOM | 963 | SG CYX   | 61 | -6.603  | -3.772 | -2.775 | 1.00 | 0.00 |
| ATOM | 964 | C CYX    | 61 | -6.757  | -7.414 | -1.152 | 1.00 | 0.00 |
| ATOM | 965 | O CYX    | 61 | -6.305  | -8.537 | -1.252 | 1.00 | 0.00 |
| ATOM | 966 | N PRO    | 62 | -8.006  | -7.158 | -0.729 | 1.00 | 0.00 |
| ATOM | 967 | CD PRO   | 62 | -9.015  | -8.111 | -0.312 | 1.00 | 0.00 |
| ATOM | 968 | HD2 PRO  | 62 | -8.661  | -8.609 | 0.591  | 1.00 | 0.00 |
| ATOM | 969 | HD3 PRO  | 62 | -9.139  | -8.847 | -1.107 | 1.00 | 0.00 |
| ATOM | 970 | CG PRO   | 62 | -10.289 | -7.289 | -0.071 | 1.00 | 0.00 |
| ATOM | 971 | HG2 PRO  | 62 | -10.573 | -7.383 | 0.977  | 1.00 | 0.00 |

|      |     |          |    |         |        |        |      |      |
|------|-----|----------|----|---------|--------|--------|------|------|
| ATOM | 972 | HG3 PRO  | 62 | -11.086 | -7.686 | -0.700 | 1.00 | 0.00 |
| ATOM | 973 | CB PRO   | 62 | -9.976  | -5.837 | -0.437 | 1.00 | 0.00 |
| ATOM | 974 | HB2 PRO  | 62 | -10.322 | -5.127 | 0.313  | 1.00 | 0.00 |
| ATOM | 975 | HB3 PRO  | 62 | -10.412 | -5.585 | -1.404 | 1.00 | 0.00 |
| ATOM | 976 | CA PRO   | 62 | -8.465  | -5.797 | -0.525 | 1.00 | 0.00 |
| ATOM | 977 | HA PRO   | 62 | -8.230  | -5.224 | -1.422 | 1.00 | 0.00 |
| ATOM | 978 | C PRO    | 62 | -7.825  | -5.153 | 0.659  | 1.00 | 0.00 |
| ATOM | 979 | O PRO    | 62 | -8.112  | -4.034 | 0.953  | 1.00 | 0.00 |
| ATOM | 980 | N THR    | 63 | -6.993  | -5.865 | 1.374  | 1.00 | 0.00 |
| ATOM | 981 | H THR    | 63 | -6.900  | -6.833 | 1.100  | 1.00 | 0.00 |
| ATOM | 982 | CA THR   | 63 | -6.258  | -5.408 | 2.527  | 1.00 | 0.00 |
| ATOM | 983 | HA THR   | 63 | -6.961  | -5.501 | 3.355  | 1.00 | 0.00 |
| ATOM | 984 | CB THR   | 63 | -5.078  | -6.340 | 2.783  | 1.00 | 0.00 |
| ATOM | 985 | HB THR   | 63 | -4.169  | -5.832 | 2.461  | 1.00 | 0.00 |
| ATOM | 986 | CG2 THR  | 63 | -4.954  | -6.718 | 4.235  | 1.00 | 0.00 |
| ATOM | 987 | HG21 THR | 63 | -5.862  | -7.227 | 4.557  | 1.00 | 0.00 |
| ATOM | 988 | HG22 THR | 63 | -4.100  | -7.382 | 4.366  | 1.00 | 0.00 |
| ATOM | 989 | HG23 THR | 63 | -4.810  | -5.819 | 4.834  | 1.00 | 0.00 |
| ATOM | 990 | OG1 THR  | 63 | -5.393  | -7.563 | 2.130  | 1.00 | 0.00 |
| ATOM | 991 | HG1 THR  | 63 | -4.677  | -8.190 | 2.261  | 1.00 | 0.00 |
| ATOM | 992 | C THR    | 63 | -5.788  | -4.000 | 2.354  | 1.00 | 0.00 |
| ATOM | 993 | O THR    | 63 | -6.103  | -3.223 | 3.231  | 1.00 | 0.00 |

|      |      |      |     |    |        |        |        |      |      |
|------|------|------|-----|----|--------|--------|--------|------|------|
| ATOM | 994  | N    | LEU | 64 | -5.187 | -3.651 | 1.217  | 1.00 | 0.00 |
| ATOM | 995  | H    | LEU | 64 | -5.001 | -4.376 | 0.538  | 1.00 | 0.00 |
| ATOM | 996  | CA   | LEU | 64 | -4.747 | -2.302 | 0.921  | 1.00 | 0.00 |
| ATOM | 997  | HA   | LEU | 64 | -3.879 | -2.048 | 1.529  | 1.00 | 0.00 |
| ATOM | 998  | CB   | LEU | 64 | -4.358 | -2.197 | -0.552 | 1.00 | 0.00 |
| ATOM | 999  | HB2  | LEU | 64 | -4.177 | -3.226 | -0.862 | 1.00 | 0.00 |
| ATOM | 1000 | HB3  | LEU | 64 | -5.193 | -1.789 | -1.121 | 1.00 | 0.00 |
| ATOM | 1001 | CG   | LEU | 64 | -3.102 | -1.356 | -0.813 | 1.00 | 0.00 |
| ATOM | 1002 | HG   | LEU | 64 | -2.460 | -1.396 | 0.067  | 1.00 | 0.00 |
| ATOM | 1003 | CD1  | LEU | 64 | -2.348 | -1.886 | -2.011 | 1.00 | 0.00 |
| ATOM | 1004 | HD11 | LEU | 64 | -2.989 | -1.846 | -2.892 | 1.00 | 0.00 |
| ATOM | 1005 | HD12 | LEU | 64 | -1.460 | -1.277 | -2.181 | 1.00 | 0.00 |
| ATOM | 1006 | HD13 | LEU | 64 | -2.050 | -2.918 | -1.826 | 1.00 | 0.00 |
| ATOM | 1007 | CD2  | LEU | 64 | -3.456 | 0.115  | -1.011 | 1.00 | 0.00 |
| ATOM | 1008 | HD21 | LEU | 64 | -3.949 | 0.494  | -0.116 | 1.00 | 0.00 |
| ATOM | 1009 | HD22 | LEU | 64 | -2.546 | 0.686  | -1.194 | 1.00 | 0.00 |
| ATOM | 1010 | HD23 | LEU | 64 | -4.126 | 0.216  | -1.865 | 1.00 | 0.00 |
| ATOM | 1011 | C    | LEU | 64 | -5.822 | -1.293 | 1.249  | 1.00 | 0.00 |
| ATOM | 1012 | O    | LEU | 64 | -5.508 | -0.275 | 1.854  | 1.00 | 0.00 |
| ATOM | 1013 | N    | LYS | 65 | -7.093 | -1.623 | 0.959  | 1.00 | 0.00 |
| ATOM | 1014 | H    | LYS | 65 | -7.236 | -2.444 | 0.387  | 1.00 | 0.00 |
| ATOM | 1015 | CA   | LYS | 65 | -8.243 | -0.830 | 1.315  | 1.00 | 0.00 |

|      |      |     |     |    |         |        |       |      |      |
|------|------|-----|-----|----|---------|--------|-------|------|------|
| ATOM | 1016 | HA  | LYS | 65 | -8.299  | 0.039  | 0.659 | 1.00 | 0.00 |
| ATOM | 1017 | CB  | LYS | 65 | -9.544  | -1.633 | 1.176 | 1.00 | 0.00 |
| ATOM | 1018 | HB2 | LYS | 65 | -9.658  | -1.939 | 0.136 | 1.00 | 0.00 |
| ATOM | 1019 | HB3 | LYS | 65 | -9.479  | -2.518 | 1.809 | 1.00 | 0.00 |
| ATOM | 1020 | CG  | LYS | 65 | -10.747 | -0.797 | 1.594 | 1.00 | 0.00 |
| ATOM | 1021 | HG2 | LYS | 65 | -10.484 | 0.257  | 1.507 | 1.00 | 0.00 |
| ATOM | 1022 | HG3 | LYS | 65 | -11.576 | -1.021 | 0.922 | 1.00 | 0.00 |
| ATOM | 1023 | CD  | LYS | 65 | -11.164 | -1.102 | 3.039 | 1.00 | 0.00 |
| ATOM | 1024 | HD2 | LYS | 65 | -10.349 | -1.622 | 3.542 | 1.00 | 0.00 |
| ATOM | 1025 | HD3 | LYS | 65 | -11.370 | -0.165 | 3.555 | 1.00 | 0.00 |
| ATOM | 1026 | CE  | LYS | 65 | -12.416 | -1.980 | 3.058 | 1.00 | 0.00 |
| ATOM | 1027 | HE2 | LYS | 65 | -12.978 | -1.819 | 2.138 | 1.00 | 0.00 |
| ATOM | 1028 | HE3 | LYS | 65 | -12.117 | -3.026 | 3.121 | 1.00 | 0.00 |
| ATOM | 1029 | NZ  | LYS | 65 | -13.263 | -1.640 | 4.218 | 1.00 | 0.00 |
| ATOM | 1030 | HZ1 | LYS | 65 | -13.541 | -0.671 | 4.159 | 1.00 | 0.00 |
| ATOM | 1031 | HZ2 | LYS | 65 | -14.085 | -2.227 | 4.218 | 1.00 | 0.00 |
| ATOM | 1032 | HZ3 | LYS | 65 | -12.742 | -1.790 | 5.070 | 1.00 | 0.00 |
| ATOM | 1033 | C   | LYS | 65 | -8.062  | -0.259 | 2.703 | 1.00 | 0.00 |
| ATOM | 1034 | O   | LYS | 65 | -8.510  | 0.819  | 2.942 | 1.00 | 0.00 |
| ATOM | 1035 | N   | GLN | 66 | -7.430  | -0.955 | 3.627 | 1.00 | 0.00 |
| ATOM | 1036 | H   | GLN | 66 | -7.242  | -1.917 | 3.383 | 1.00 | 0.00 |
| ATOM | 1037 | CA  | GLN | 66 | -7.076  | -0.510 | 4.924 | 1.00 | 0.00 |

|      |      |      |     |    |        |        |       |      |      |
|------|------|------|-----|----|--------|--------|-------|------|------|
| ATOM | 1038 | HA   | GLN | 66 | -7.963 | -0.134 | 5.434 | 1.00 | 0.00 |
| ATOM | 1039 | CB   | GLN | 66 | -6.480 | -1.650 | 5.756 | 1.00 | 0.00 |
| ATOM | 1040 | HB2  | GLN | 66 | -7.187 | -2.479 | 5.788 | 1.00 | 0.00 |
| ATOM | 1041 | HB3  | GLN | 66 | -5.550 | -1.984 | 5.295 | 1.00 | 0.00 |
| ATOM | 1042 | CG   | GLN | 66 | -6.196 | -1.162 | 7.189 | 1.00 | 0.00 |
| ATOM | 1043 | HG2  | GLN | 66 | -5.918 | -1.971 | 7.865 | 1.00 | 0.00 |
| ATOM | 1044 | HG3  | GLN | 66 | -5.368 | -0.458 | 7.106 | 1.00 | 0.00 |
| ATOM | 1045 | CD   | GLN | 66 | -7.401 | -0.431 | 7.773 | 1.00 | 0.00 |
| ATOM | 1046 | OE1  | GLN | 66 | -7.288 | 0.602  | 8.409 | 1.00 | 0.00 |
| ATOM | 1047 | NE2  | GLN | 66 | -8.589 | -0.945 | 7.467 | 1.00 | 0.00 |
| ATOM | 1048 | HE21 | GLN | 66 | -9.430 | -0.511 | 7.820 | 1.00 | 0.00 |
| ATOM | 1049 | HE22 | GLN | 66 | -8.645 | -1.767 | 6.883 | 1.00 | 0.00 |
| ATOM | 1050 | C    | GLN | 66 | -6.130 | 0.664  | 4.906 | 1.00 | 0.00 |
| ATOM | 1051 | O    | GLN | 66 | -6.521 | 1.767  | 5.267 | 1.00 | 0.00 |
| ATOM | 1052 | N    | ALA | 67 | -4.875 | 0.441  | 4.522 | 1.00 | 0.00 |
| ATOM | 1053 | H    | ALA | 67 | -4.576 | -0.506 | 4.335 | 1.00 | 0.00 |
| ATOM | 1054 | CA   | ALA | 67 | -3.899 | 1.500  | 4.420 | 1.00 | 0.00 |
| ATOM | 1055 | HA   | ALA | 67 | -3.680 | 1.911  | 5.405 | 1.00 | 0.00 |
| ATOM | 1056 | CB   | ALA | 67 | -2.611 | 0.940  | 3.829 | 1.00 | 0.00 |
| ATOM | 1057 | HB1  | ALA | 67 | -2.812 | 0.533  | 2.838 | 1.00 | 0.00 |
| ATOM | 1058 | HB2  | ALA | 67 | -1.870 | 1.736  | 3.751 | 1.00 | 0.00 |
| ATOM | 1059 | HB3  | ALA | 67 | -2.228 | 0.150  | 4.475 | 1.00 | 0.00 |

|      |      |     |     |    |         |       |        |      |      |
|------|------|-----|-----|----|---------|-------|--------|------|------|
| ATOM | 1060 | C   | ALA | 67 | -4.452  | 2.644 | 3.577  | 1.00 | 0.00 |
| ATOM | 1061 | O   | ALA | 67 | -4.074  | 3.786 | 3.773  | 1.00 | 0.00 |
| ATOM | 1062 | N   | ALA | 68 | -5.429  | 2.369 | 2.720  | 1.00 | 0.00 |
| ATOM | 1063 | H   | ALA | 68 | -5.704  | 1.404 | 2.605  | 1.00 | 0.00 |
| ATOM | 1064 | CA  | ALA | 68 | -6.073  | 3.360 | 1.911  | 1.00 | 0.00 |
| ATOM | 1065 | HA  | ALA | 68 | -5.383  | 4.172 | 1.680  | 1.00 | 0.00 |
| ATOM | 1066 | CB  | ALA | 68 | -6.511  | 2.707 | 0.606  | 1.00 | 0.00 |
| ATOM | 1067 | HB1 | ALA | 68 | -7.209  | 1.898 | 0.820  | 1.00 | 0.00 |
| ATOM | 1068 | HB2 | ALA | 68 | -6.999  | 3.449 | -0.027 | 1.00 | 0.00 |
| ATOM | 1069 | HB3 | ALA | 68 | -5.639  | 2.306 | 0.089  | 1.00 | 0.00 |
| ATOM | 1070 | C   | ALA | 68 | -7.252  | 3.978 | 2.649  | 1.00 | 0.00 |
| ATOM | 1071 | O   | ALA | 68 | -7.624  | 5.129 | 2.448  | 1.00 | 0.00 |
| ATOM | 1072 | N   | LYS | 69 | -7.864  | 3.237 | 3.561  | 1.00 | 0.00 |
| ATOM | 1073 | H   | LYS | 69 | -7.565  | 2.276 | 3.644  | 1.00 | 0.00 |
| ATOM | 1074 | CA  | LYS | 69 | -8.968  | 3.678 | 4.364  | 1.00 | 0.00 |
| ATOM | 1075 | HA  | LYS | 69 | -9.670  | 4.236 | 3.744  | 1.00 | 0.00 |
| ATOM | 1076 | CB  | LYS | 69 | -9.706  | 2.485 | 4.988  | 1.00 | 0.00 |
| ATOM | 1077 | HB2 | LYS | 69 | -10.064 | 1.836 | 4.189  | 1.00 | 0.00 |
| ATOM | 1078 | HB3 | LYS | 69 | -9.010  | 1.932 | 5.620  | 1.00 | 0.00 |
| ATOM | 1079 | CG  | LYS | 69 | -10.893 | 2.959 | 5.830  | 1.00 | 0.00 |
| ATOM | 1080 | HG2 | LYS | 69 | -11.520 | 2.098 | 6.064  | 1.00 | 0.00 |
| ATOM | 1081 | HG3 | LYS | 69 | -10.513 | 3.393 | 6.755  | 1.00 | 0.00 |

|      |      |     |     |    |         |       |       |      |      |
|------|------|-----|-----|----|---------|-------|-------|------|------|
| ATOM | 1082 | CD  | LYS | 69 | -11.724 | 4.008 | 5.075 | 1.00 | 0.00 |
| ATOM | 1083 | HD2 | LYS | 69 | -11.181 | 4.953 | 5.081 | 1.00 | 0.00 |
| ATOM | 1084 | HD3 | LYS | 69 | -11.856 | 3.672 | 4.046 | 1.00 | 0.00 |
| ATOM | 1085 | CE  | LYS | 69 | -13.086 | 4.202 | 5.724 | 1.00 | 0.00 |
| ATOM | 1086 | HE2 | LYS | 69 | -13.814 | 3.574 | 5.210 | 1.00 | 0.00 |
| ATOM | 1087 | HE3 | LYS | 69 | -13.024 | 3.903 | 6.770 | 1.00 | 0.00 |
| ATOM | 1088 | NZ  | LYS | 69 | -13.508 | 5.613 | 5.640 | 1.00 | 0.00 |
| ATOM | 1089 | HZ1 | LYS | 69 | -13.566 | 5.889 | 4.670 | 1.00 | 0.00 |
| ATOM | 1090 | HZ2 | LYS | 69 | -14.413 | 5.720 | 6.076 | 1.00 | 0.00 |
| ATOM | 1091 | HZ3 | LYS | 69 | -12.834 | 6.195 | 6.116 | 1.00 | 0.00 |
| ATOM | 1092 | C   | LYS | 69 | -8.457  | 4.649 | 5.399 | 1.00 | 0.00 |
| ATOM | 1093 | O   | LYS | 69 | -9.143  | 5.599 | 5.717 | 1.00 | 0.00 |
| ATOM | 1094 | N   | SER | 70 | -7.236  | 4.463 | 5.884 | 1.00 | 0.00 |
| ATOM | 1095 | H   | SER | 70 | -6.717  | 3.648 | 5.590 | 1.00 | 0.00 |
| ATOM | 1096 | CA  | SER | 70 | -6.630  | 5.349 | 6.854 | 1.00 | 0.00 |
| ATOM | 1097 | HA  | SER | 70 | -7.398  | 5.965 | 7.322 | 1.00 | 0.00 |
| ATOM | 1098 | CB  | SER | 70 | -5.921  | 4.548 | 7.938 | 1.00 | 0.00 |
| ATOM | 1099 | HB2 | SER | 70 | -6.637  | 3.856 | 8.382 | 1.00 | 0.00 |
| ATOM | 1100 | HB3 | SER | 70 | -5.109  | 3.984 | 7.478 | 1.00 | 0.00 |
| ATOM | 1101 | OG  | SER | 70 | -5.395  | 5.397 | 8.947 | 1.00 | 0.00 |
| ATOM | 1102 | HG  | SER | 70 | -4.955  | 4.866 | 9.615 | 1.00 | 0.00 |
| ATOM | 1103 | C   | SER | 70 | -5.659  | 6.286 | 6.162 | 1.00 | 0.00 |



|      |      |      |     |    |        |        |       |      |      |
|------|------|------|-----|----|--------|--------|-------|------|------|
| ATOM | 1104 | O    | SER | 70 | -4.855 | 6.974  | 6.793 | 1.00 | 0.00 |
| ATOM | 1105 | N    | VAL | 71 | -5.719 | 6.339  | 4.826 | 1.00 | 0.00 |
| ATOM | 1106 | H    | VAL | 71 | -6.335 | 5.709  | 4.332 | 1.00 | 0.00 |
| ATOM | 1107 | CA   | VAL | 71 | -4.863 | 7.211  | 4.050 | 1.00 | 0.00 |
| ATOM | 1108 | HA   | VAL | 71 | -3.806 | 7.113  | 4.297 | 1.00 | 0.00 |
| ATOM | 1109 | CB   | VAL | 71 | -5.044 | 6.927  | 2.559 | 1.00 | 0.00 |
| ATOM | 1110 | HB   | VAL | 71 | -5.512 | 5.948  | 2.446 | 1.00 | 0.00 |
| ATOM | 1111 | CG1  | VAL | 71 | -5.907 | 7.975  | 1.902 | 1.00 | 0.00 |
| ATOM | 1112 | HG11 | VAL | 71 | -5.440 | 8.953  | 2.014 | 1.00 | 0.00 |
| ATOM | 1113 | HG12 | VAL | 71 | -6.016 | 7.744  | 0.842 | 1.00 | 0.00 |
| ATOM | 1114 | HG13 | VAL | 71 | -6.889 | 7.985  | 2.374 | 1.00 | 0.00 |
| ATOM | 1115 | CG2  | VAL | 71 | -3.713 | 6.809  | 1.845 | 1.00 | 0.00 |
| ATOM | 1116 | HG21 | VAL | 71 | -3.137 | 5.993  | 2.282 | 1.00 | 0.00 |
| ATOM | 1117 | HG22 | VAL | 71 | -3.884 | 6.607  | 0.787 | 1.00 | 0.00 |
| ATOM | 1118 | HG23 | VAL | 71 | -3.159 | 7.741  | 1.951 | 1.00 | 0.00 |
| ATOM | 1119 | C    | VAL | 71 | -5.172 | 8.654  | 4.422 | 1.00 | 0.00 |
| ATOM | 1120 | O    | VAL | 71 | -4.462 | 9.578  | 4.084 | 1.00 | 0.00 |
| ATOM | 1121 | N    | ARG | 72 | -6.298 | 8.908  | 5.082 | 1.00 | 0.00 |
| ATOM | 1122 | H    | ARG | 72 | -6.931 | 8.143  | 5.269 | 1.00 | 0.00 |
| ATOM | 1123 | CA   | ARG | 72 | -6.677 | 10.226 | 5.512 | 1.00 | 0.00 |
| ATOM | 1124 | HA   | ARG | 72 | -5.799 | 10.795 | 5.817 | 1.00 | 0.00 |
| ATOM | 1125 | CB   | ARG | 72 | -7.353 | 10.955 | 4.348 | 1.00 | 0.00 |

|      |      |      |     |    |        |        |       |      |      |
|------|------|------|-----|----|--------|--------|-------|------|------|
| ATOM | 1126 | HB2  | ARG | 72 | -7.334 | 10.312 | 3.467 | 1.00 | 0.00 |
| ATOM | 1127 | HB3  | ARG | 72 | -8.387 | 11.171 | 4.617 | 1.00 | 0.00 |
| ATOM | 1128 | CG   | ARG | 72 | -6.623 | 12.261 | 4.041 | 1.00 | 0.00 |
| ATOM | 1129 | HG2  | ARG | 72 | -5.691 | 12.275 | 4.605 | 1.00 | 0.00 |
| ATOM | 1130 | HG3  | ARG | 72 | -6.402 | 12.289 | 2.974 | 1.00 | 0.00 |
| ATOM | 1131 | CD   | ARG | 72 | -7.462 | 13.475 | 4.417 | 1.00 | 0.00 |
| ATOM | 1132 | HD2  | ARG | 72 | -8.195 | 13.655 | 3.630 | 1.00 | 0.00 |
| ATOM | 1133 | HD3  | ARG | 72 | -7.979 | 13.269 | 5.354 | 1.00 | 0.00 |
| ATOM | 1134 | NE   | ARG | 72 | -6.647 | 14.682 | 4.585 | 1.00 | 0.00 |
| ATOM | 1135 | HE   | ARG | 72 | -6.694 | 15.369 | 3.847 | 1.00 | 0.00 |
| ATOM | 1136 | CZ   | ARG | 72 | -5.854 | 14.919 | 5.622 | 1.00 | 0.00 |
| ATOM | 1137 | NH1  | ARG | 72 | -5.795 | 14.062 | 6.617 | 1.00 | 0.00 |
| ATOM | 1138 | HH11 | ARG | 72 | -6.355 | 13.222 | 6.590 | 1.00 | 0.00 |
| ATOM | 1139 | HH12 | ARG | 72 | -5.190 | 14.247 | 7.404 | 1.00 | 0.00 |
| ATOM | 1140 | NH2  | ARG | 72 | -5.139 | 16.014 | 5.663 | 1.00 | 0.00 |
| ATOM | 1141 | HH21 | ARG | 72 | -5.193 | 16.677 | 4.903 | 1.00 | 0.00 |
| ATOM | 1142 | HH22 | ARG | 72 | -4.537 | 16.190 | 6.454 | 1.00 | 0.00 |
| ATOM | 1143 | C    | ARG | 72 | -7.602 | 10.133 | 6.697 | 1.00 | 0.00 |
| ATOM | 1144 | O    | ARG | 72 | -7.197 | 10.475 | 7.800 | 1.00 | 0.00 |
| ATOM | 1145 | N    | VAL | 73 | -8.867 | 9.766  | 6.431 | 1.00 | 0.00 |
| ATOM | 1146 | H    | VAL | 73 | -9.141 | 9.612  | 5.471 | 1.00 | 0.00 |
| ATOM | 1147 | CA   | VAL | 73 | -9.879 | 9.665  | 7.456 | 1.00 | 0.00 |

|      |      |      |     |    |         |        |        |      |      |
|------|------|------|-----|----|---------|--------|--------|------|------|
| ATOM | 1148 | HA   | VAL | 73 | -10.163 | 10.634 | 7.866  | 1.00 | 0.00 |
| ATOM | 1149 | CB   | VAL | 73 | -11.127 | 8.993  | 6.883  | 1.00 | 0.00 |
| ATOM | 1150 | HB   | VAL | 73 | -11.297 | 9.388  | 5.882  | 1.00 | 0.00 |
| ATOM | 1151 | CG1  | VAL | 73 | -10.979 | 7.480  | 6.812  | 1.00 | 0.00 |
| ATOM | 1152 | HG11 | VAL | 73 | -10.809 | 7.083  | 7.813  | 1.00 | 0.00 |
| ATOM | 1153 | HG12 | VAL | 73 | -11.889 | 7.044  | 6.399  | 1.00 | 0.00 |
| ATOM | 1154 | HG13 | VAL | 73 | -10.133 | 7.226  | 6.173  | 1.00 | 0.00 |
| ATOM | 1155 | CG2  | VAL | 73 | -12.366 | 9.358  | 7.704  | 1.00 | 0.00 |
| ATOM | 1156 | HG21 | VAL | 73 | -12.509 | 10.438 | 7.686  | 1.00 | 0.00 |
| ATOM | 1157 | HG22 | VAL | 73 | -13.242 | 8.868  | 7.278  | 1.00 | 0.00 |
| ATOM | 1158 | HG23 | VAL | 73 | -12.231 | 9.027  | 8.734  | 1.00 | 0.00 |
| ATOM | 1159 | C    | VAL | 73 | -9.298  | 8.918  | 8.655  | 1.00 | 0.00 |
| ATOM | 1160 | O    | VAL | 73 | -8.332  | 8.155  | 8.532  | 1.00 | 0.00 |
| ATOM | 1161 | N    | GLN | 74 | -9.926  | 9.107  | 9.801  | 1.00 | 0.00 |
| ATOM | 1162 | H    | GLN | 74 | -10.701 | 9.752  | 9.856  | 1.00 | 0.00 |
| ATOM | 1163 | CA   | GLN | 74 | -9.482  | 8.462  | 11.019 | 1.00 | 0.00 |
| ATOM | 1164 | HA   | GLN | 74 | -9.498  | 7.379  | 10.890 | 1.00 | 0.00 |
| ATOM | 1165 | CB   | GLN | 74 | -8.052  | 8.893  | 11.365 | 1.00 | 0.00 |
| ATOM | 1166 | HB2  | GLN | 74 | -7.568  | 9.277  | 10.467 | 1.00 | 0.00 |
| ATOM | 1167 | HB3  | GLN | 74 | -8.089  | 9.677  | 12.121 | 1.00 | 0.00 |
| ATOM | 1168 | CG   | GLN | 74 | -7.255  | 7.700  | 11.904 | 1.00 | 0.00 |
| ATOM | 1169 | HG2  | GLN | 74 | -7.949  | 7.013  | 12.389 | 1.00 | 0.00 |

|      |      |      |     |    |         |        |        |      |      |
|------|------|------|-----|----|---------|--------|--------|------|------|
| ATOM | 1170 | HG3  | GLN | 74 | -6.748  | 7.186  | 11.087 | 1.00 | 0.00 |
| ATOM | 1171 | CD   | GLN | 74 | -6.213  | 8.139  | 12.923 | 1.00 | 0.00 |
| ATOM | 1172 | OE1  | GLN | 74 | -5.870  | 9.306  | 13.052 | 1.00 | 0.00 |
| ATOM | 1173 | NE2  | GLN | 74 | -5.682  | 7.172  | 13.649 | 1.00 | 0.00 |
| ATOM | 1174 | HE21 | GLN | 74 | -4.984  | 7.392  | 14.345 | 1.00 | 0.00 |
| ATOM | 1175 | HE22 | GLN | 74 | -5.977  | 6.216  | 13.505 | 1.00 | 0.00 |
| ATOM | 1176 | C    | GLN | 74 | -10.440 | 8.764  | 12.167 | 1.00 | 0.00 |
| ATOM | 1177 | O    | GLN | 74 | -10.044 | 8.940  | 13.313 | 1.00 | 0.00 |
| ATOM | 1178 | N    | GLY | 75 | -11.728 | 8.892  | 11.835 | 1.00 | 0.00 |
| ATOM | 1179 | H    | GLY | 75 | -12.009 | 8.787  | 10.870 | 1.00 | 0.00 |
| ATOM | 1180 | CA   | GLY | 75 | -12.749 | 9.179  | 12.820 | 1.00 | 0.00 |
| ATOM | 1181 | HA2  | GLY | 75 | -12.864 | 8.319  | 13.480 | 1.00 | 0.00 |
| ATOM | 1182 | HA3  | GLY | 75 | -12.450 | 10.048 | 13.405 | 1.00 | 0.00 |
| ATOM | 1183 | C    | GLY | 75 | -14.072 | 9.467  | 12.154 | 1.00 | 0.00 |
| ATOM | 1184 | O    | GLY | 75 | -15.060 | 8.791  | 12.424 | 1.00 | 0.00 |
| ATOM | 1185 | N    | GLN | 76 | -14.072 | 10.427 | 11.216 | 1.00 | 0.00 |
| ATOM | 1186 | H    | GLN | 76 | -13.220 | 10.933 | 11.023 | 1.00 | 0.00 |
| ATOM | 1187 | CA   | GLN | 76 | -15.274 | 10.810 | 10.505 | 1.00 | 0.00 |
| ATOM | 1188 | HA   | GLN | 76 | -15.586 | 9.991  | 9.857  | 1.00 | 0.00 |
| ATOM | 1189 | CB   | GLN | 76 | -16.419 | 11.133 | 11.473 | 1.00 | 0.00 |
| ATOM | 1190 | HB2  | GLN | 76 | -16.158 | 10.768 | 12.466 | 1.00 | 0.00 |
| ATOM | 1191 | HB3  | GLN | 76 | -16.561 | 12.213 | 11.508 | 1.00 | 0.00 |

|      |      |      |     |    |         |        |        |      |      |
|------|------|------|-----|----|---------|--------|--------|------|------|
| ATOM | 1192 | CG   | GLN | 76 | -17.715 | 10.464 | 11.008 | 1.00 | 0.00 |
| ATOM | 1193 | HG2  | GLN | 76 | -17.769 | 10.491 | 9.920  | 1.00 | 0.00 |
| ATOM | 1194 | HG3  | GLN | 76 | -17.742 | 9.428  | 11.346 | 1.00 | 0.00 |
| ATOM | 1195 | CD   | GLN | 76 | -18.923 | 11.190 | 11.572 | 1.00 | 0.00 |
| ATOM | 1196 | OE1  | GLN | 76 | -19.498 | 12.057 | 10.935 | 1.00 | 0.00 |
| ATOM | 1197 | NE2  | GLN | 76 | -19.295 | 10.825 | 12.782 | 1.00 | 0.00 |
| ATOM | 1198 | HE21 | GLN | 76 | -20.092 | 11.268 | 13.217 | 1.00 | 0.00 |
| ATOM | 1199 | HE22 | GLN | 76 | -18.782 | 10.104 | 13.269 | 1.00 | 0.00 |
| ATOM | 1200 | C    | GLN | 76 | -14.999 | 11.998 | 9.603  | 1.00 | 0.00 |
| ATOM | 1201 | O    | GLN | 76 | -14.820 | 13.125 | 10.052 | 1.00 | 0.00 |
| ATOM | 1202 | N    | HID | 77 | -14.882 | 11.730 | 8.304  | 1.00 | 0.00 |
| ATOM | 1203 | H    | HID | 77 | -14.866 | 10.767 | 8.000  | 1.00 | 0.00 |
| ATOM | 1204 | CA   | HID | 77 | -14.648 | 12.769 | 7.314  | 1.00 | 0.00 |
| ATOM | 1205 | HA   | HID | 77 | -14.817 | 13.753 | 7.751  | 1.00 | 0.00 |
| ATOM | 1206 | CB   | HID | 77 | -13.199 | 12.692 | 6.828  | 1.00 | 0.00 |
| ATOM | 1207 | HB2  | HID | 77 | -12.514 | 12.857 | 7.659  | 1.00 | 0.00 |
| ATOM | 1208 | HB3  | HID | 77 | -12.996 | 11.719 | 6.379  | 1.00 | 0.00 |
| ATOM | 1209 | CG   | HID | 77 | -12.868 | 13.725 | 5.785  | 1.00 | 0.00 |
| ATOM | 1210 | ND1  | HID | 77 | -12.248 | 14.927 | 6.050  | 1.00 | 0.00 |
| ATOM | 1211 | HD1  | HID | 77 | -11.954 | 15.249 | 6.961  | 1.00 | 0.00 |
| ATOM | 1212 | CE1  | HID | 77 | -12.103 | 15.595 | 4.889  | 1.00 | 0.00 |
| ATOM | 1213 | HE1  | HID | 77 | -11.622 | 16.573 | 4.874  | 1.00 | 0.00 |

|      |      |     |     |    |         |        |        |      |      |
|------|------|-----|-----|----|---------|--------|--------|------|------|
| ATOM | 1214 | NE2 | HID | 77 | -12.627 | 14.855 | 3.897  | 1.00 | 0.00 |
| ATOM | 1215 | CD2 | HID | 77 | -13.103 | 13.672 | 4.433  | 1.00 | 0.00 |
| ATOM | 1216 | HD2 | HID | 77 | -13.558 | 12.923 | 3.784  | 1.00 | 0.00 |
| ATOM | 1217 | C   | HID | 77 | -15.680 | 12.671 | 6.197  | 1.00 | 0.00 |
| ATOM | 1218 | O   | HID | 77 | -15.569 | 13.339 | 5.180  | 1.00 | 0.00 |
| ATOM | 1219 | N   | GLY | 78 | -16.689 | 11.819 | 6.382  | 1.00 | 0.00 |
| ATOM | 1220 | H   | GLY | 78 | -16.745 | 11.296 | 7.244  | 1.00 | 0.00 |
| ATOM | 1221 | CA  | GLY | 78 | -17.713 | 11.613 | 5.390  | 1.00 | 0.00 |
| ATOM | 1222 | HA2 | GLY | 78 | -18.378 | 10.816 | 5.725  | 1.00 | 0.00 |
| ATOM | 1223 | HA3 | GLY | 78 | -18.283 | 12.534 | 5.271  | 1.00 | 0.00 |
| ATOM | 1224 | C   | GLY | 78 | -17.110 | 11.222 | 4.039  | 1.00 | 0.00 |
| ATOM | 1225 | O   | GLY | 78 | -15.887 | 11.046 | 3.884  | 1.00 | 0.00 |
| ATOM | 1226 | N   | PRO | 79 | -17.987 | 11.020 | 3.055  | 1.00 | 0.00 |
| ATOM | 1227 | CD  | PRO | 79 | -19.434 | 11.148 | 3.156  | 1.00 | 0.00 |
| ATOM | 1228 | HD2 | PRO | 79 | -19.670 | 12.199 | 3.318  | 1.00 | 0.00 |
| ATOM | 1229 | HD3 | PRO | 79 | -19.766 | 10.565 | 4.015  | 1.00 | 0.00 |
| ATOM | 1230 | CG  | PRO | 79 | -19.998 | 10.615 | 1.835  | 1.00 | 0.00 |
| ATOM | 1231 | HG2 | PRO | 79 | -20.512 | 11.424 | 1.317  | 1.00 | 0.00 |
| ATOM | 1232 | HG3 | PRO | 79 | -20.706 | 9.814  | 2.049  | 1.00 | 0.00 |
| ATOM | 1233 | CB  | PRO | 79 | -18.811 | 10.092 | 1.017  | 1.00 | 0.00 |
| ATOM | 1234 | HB2 | PRO | 79 | -18.844 | 10.434 | -0.018 | 1.00 | 0.00 |
| ATOM | 1235 | HB3 | PRO | 79 | -18.779 | 9.002  | 1.038  | 1.00 | 0.00 |

|      |      |     |     |    |         |        |        |      |      |
|------|------|-----|-----|----|---------|--------|--------|------|------|
| ATOM | 1236 | CA  | PRO | 79 | -17.578 | 10.663 | 1.714  | 1.00 | 0.00 |
| ATOM | 1237 | HA  | PRO | 79 | -16.854 | 9.851  | 1.785  | 1.00 | 0.00 |
| ATOM | 1238 | C   | PRO | 79 | -16.955 | 11.831 | 0.974  | 1.00 | 0.00 |
| ATOM | 1239 | O   | PRO | 79 | -17.657 | 12.681 | 0.447  | 1.00 | 0.00 |
| ATOM | 1240 | N   | PHE | 80 | -15.617 | 11.870 | 0.949  | 1.00 | 0.00 |
| ATOM | 1241 | H   | PHE | 80 | -15.079 | 11.135 | 1.387  | 1.00 | 0.00 |
| ATOM | 1242 | CA  | PHE | 80 | -14.904 | 12.948 | 0.300  | 1.00 | 0.00 |
| ATOM | 1243 | HA  | PHE | 80 | -15.463 | 13.337 | -0.551 | 1.00 | 0.00 |
| ATOM | 1244 | CB  | PHE | 80 | -14.736 | 14.068 | 1.327  | 1.00 | 0.00 |
| ATOM | 1245 | HB2 | PHE | 80 | -15.580 | 14.075 | 2.017  | 1.00 | 0.00 |
| ATOM | 1246 | HB3 | PHE | 80 | -13.812 | 13.919 | 1.885  | 1.00 | 0.00 |
| ATOM | 1247 | CG  | PHE | 80 | -14.659 | 15.445 | 0.726  | 1.00 | 0.00 |
| ATOM | 1248 | CD1 | PHE | 80 | -15.829 | 16.086 | 0.297  | 1.00 | 0.00 |
| ATOM | 1249 | HD1 | PHE | 80 | -16.790 | 15.582 | 0.398  | 1.00 | 0.00 |
| ATOM | 1250 | CE1 | PHE | 80 | -15.766 | 17.373 | -0.262 | 1.00 | 0.00 |
| ATOM | 1251 | HE1 | PHE | 80 | -16.682 | 17.863 | -0.593 | 1.00 | 0.00 |
| ATOM | 1252 | CZ  | PHE | 80 | -14.533 | 18.027 | -0.396 | 1.00 | 0.00 |
| ATOM | 1253 | HZ  | PHE | 80 | -14.478 | 19.024 | -0.832 | 1.00 | 0.00 |
| ATOM | 1254 | CE2 | PHE | 80 | -13.363 | 17.385 | 0.037  | 1.00 | 0.00 |
| ATOM | 1255 | HE2 | PHE | 80 | -12.402 | 17.889 | -0.062 | 1.00 | 0.00 |
| ATOM | 1256 | CD2 | PHE | 80 | -13.427 | 16.099 | 0.596  | 1.00 | 0.00 |
| ATOM | 1257 | HD2 | PHE | 80 | -12.515 | 15.604 | 0.931  | 1.00 | 0.00 |

|      |      |      |     |    |         |        |        |      |      |
|------|------|------|-----|----|---------|--------|--------|------|------|
| ATOM | 1258 | C    | PHE | 80 | -13.541 | 12.482 | -0.178 | 1.00 | 0.00 |
| ATOM | 1259 | O    | PHE | 80 | -13.245 | 12.448 | -1.361 | 1.00 | 0.00 |
| ATOM | 1260 | N    | GLN | 81 | -12.693 | 12.085 | 0.779  | 1.00 | 0.00 |
| ATOM | 1261 | H    | GLN | 81 | -12.999 | 12.086 | 1.741  | 1.00 | 0.00 |
| ATOM | 1262 | CA   | GLN | 81 | -11.342 | 11.669 | 0.491  | 1.00 | 0.00 |
| ATOM | 1263 | HA   | GLN | 81 | -10.884 | 12.386 | -0.190 | 1.00 | 0.00 |
| ATOM | 1264 | CB   | GLN | 81 | -10.496 | 11.588 | 1.755  | 1.00 | 0.00 |
| ATOM | 1265 | HB2  | GLN | 81 | -10.850 | 10.752 | 2.359  | 1.00 | 0.00 |
| ATOM | 1266 | HB3  | GLN | 81 | -9.458  | 11.415 | 1.470  | 1.00 | 0.00 |
| ATOM | 1267 | CG   | GLN | 81 | -10.593 | 12.875 | 2.563  | 1.00 | 0.00 |
| ATOM | 1268 | HG2  | GLN | 81 | -9.739  | 13.502 | 2.307  | 1.00 | 0.00 |
| ATOM | 1269 | HG3  | GLN | 81 | -11.516 | 13.406 | 2.331  | 1.00 | 0.00 |
| ATOM | 1270 | CD   | GLN | 81 | -10.558 | 12.593 | 4.052  | 1.00 | 0.00 |
| ATOM | 1271 | OE1  | GLN | 81 | -10.882 | 11.530 | 4.549  | 1.00 | 0.00 |
| ATOM | 1272 | NE2  | GLN | 81 | -10.176 | 13.600 | 4.806  | 1.00 | 0.00 |
| ATOM | 1273 | HE21 | GLN | 81 | -10.128 | 13.486 | 5.808  | 1.00 | 0.00 |
| ATOM | 1274 | HE22 | GLN | 81 | -9.932  | 14.482 | 4.379  | 1.00 | 0.00 |
| ATOM | 1275 | C    | GLN | 81 | -11.411 | 10.329 | -0.164 | 1.00 | 0.00 |
| ATOM | 1276 | O    | GLN | 81 | -10.959 | 10.244 | -1.274 | 1.00 | 0.00 |
| ATOM | 1277 | N    | SER | 82 | -12.025 | 9.327  | 0.477  | 1.00 | 0.00 |
| ATOM | 1278 | H    | SER | 82 | -12.424 | 9.514  | 1.385  | 1.00 | 0.00 |
| ATOM | 1279 | CA   | SER | 82 | -12.143 | 7.984  | -0.063 | 1.00 | 0.00 |



|      |      |      |     |    |         |        |        |      |      |
|------|------|------|-----|----|---------|--------|--------|------|------|
| ATOM | 1280 | HA   | SER | 82 | -11.212 | 7.440  | 0.097  | 1.00 | 0.00 |
| ATOM | 1281 | CB   | SER | 82 | -13.275 | 7.226  | 0.623  | 1.00 | 0.00 |
| ATOM | 1282 | HB2  | SER | 82 | -13.012 | 7.113  | 1.674  | 1.00 | 0.00 |
| ATOM | 1283 | HB3  | SER | 82 | -14.179 | 7.828  | 0.538  | 1.00 | 0.00 |
| ATOM | 1284 | OG   | SER | 82 | -13.502 | 5.958  | 0.058  | 1.00 | 0.00 |
| ATOM | 1285 | HG   | SER | 82 | -14.221 | 5.524  | 0.523  | 1.00 | 0.00 |
| ATOM | 1286 | C    | SER | 82 | -12.428 | 8.030  | -1.547 | 1.00 | 0.00 |
| ATOM | 1287 | O    | SER | 82 | -11.725 | 7.406  | -2.298 | 1.00 | 0.00 |
| ATOM | 1288 | N    | THR | 83 | -13.365 | 8.876  | -1.963 | 1.00 | 0.00 |
| ATOM | 1289 | H    | THR | 83 | -13.932 | 9.351  | -1.275 | 1.00 | 0.00 |
| ATOM | 1290 | CA   | THR | 83 | -13.687 | 9.059  | -3.361 | 1.00 | 0.00 |
| ATOM | 1291 | HA   | THR | 83 | -14.266 | 8.192  | -3.680 | 1.00 | 0.00 |
| ATOM | 1292 | CB   | THR | 83 | -14.554 | 10.308 | -3.514 | 1.00 | 0.00 |
| ATOM | 1293 | HB   | THR | 83 | -14.379 | 10.935 | -2.640 | 1.00 | 0.00 |
| ATOM | 1294 | CG2  | THR | 83 | -14.257 | 11.106 | -4.780 | 1.00 | 0.00 |
| ATOM | 1295 | HG21 | THR | 83 | -14.432 | 10.479 | -5.655 | 1.00 | 0.00 |
| ATOM | 1296 | HG22 | THR | 83 | -14.910 | 11.978 | -4.822 | 1.00 | 0.00 |
| ATOM | 1297 | HG23 | THR | 83 | -13.217 | 11.431 | -4.769 | 1.00 | 0.00 |
| ATOM | 1298 | OG1  | THR | 83 | -15.869 | 9.852  | -3.638 | 1.00 | 0.00 |
| ATOM | 1299 | HG1  | THR | 83 | -16.460 | 10.602 | -3.738 | 1.00 | 0.00 |
| ATOM | 1300 | C    | THR | 83 | -12.432 | 9.096  | -4.223 | 1.00 | 0.00 |
| ATOM | 1301 | O    | THR | 83 | -12.107 | 8.135  | -4.922 | 1.00 | 0.00 |

|      |      |      |     |    |         |        |         |      |      |
|------|------|------|-----|----|---------|--------|---------|------|------|
| ATOM | 1302 | N    | ARG | 84 | -11.675 | 10.196 | -4.129  | 1.00 | 0.00 |
| ATOM | 1303 | H    | ARG | 84 | -11.955 | 10.938 | -3.505  | 1.00 | 0.00 |
| ATOM | 1304 | CA   | ARG | 84 | -10.478 | 10.370 | -4.898  | 1.00 | 0.00 |
| ATOM | 1305 | HA   | ARG | 84 | -10.675 | 10.124 | -5.942  | 1.00 | 0.00 |
| ATOM | 1306 | CB   | ARG | 84 | -9.986  | 11.816 | -4.821  | 1.00 | 0.00 |
| ATOM | 1307 | HB2  | ARG | 84 | -10.655 | 12.381 | -4.172  | 1.00 | 0.00 |
| ATOM | 1308 | HB3  | ARG | 84 | -8.980  | 11.824 | -4.401  | 1.00 | 0.00 |
| ATOM | 1309 | CG   | ARG | 84 | -9.963  | 12.457 | -6.214  | 1.00 | 0.00 |
| ATOM | 1310 | HG2  | ARG | 84 | -10.992 | 12.641 | -6.522  | 1.00 | 0.00 |
| ATOM | 1311 | HG3  | ARG | 84 | -9.429  | 13.405 | -6.145  | 1.00 | 0.00 |
| ATOM | 1312 | CD   | ARG | 84 | -9.275  | 11.558 | -7.246  | 1.00 | 0.00 |
| ATOM | 1313 | HD2  | ARG | 84 | -8.806  | 10.715 | -6.738  | 1.00 | 0.00 |
| ATOM | 1314 | HD3  | ARG | 84 | -10.015 | 11.187 | -7.956  | 1.00 | 0.00 |
| ATOM | 1315 | NE   | ARG | 84 | -8.240  | 12.298 | -7.987  | 1.00 | 0.00 |
| ATOM | 1316 | HE   | ARG | 84 | -7.908  | 13.146 | -7.550  | 1.00 | 0.00 |
| ATOM | 1317 | CZ   | ARG | 84 | -7.738  | 11.955 | -9.156  | 1.00 | 0.00 |
| ATOM | 1318 | NH1  | ARG | 84 | -8.199  | 10.902 | -9.790  | 1.00 | 0.00 |
| ATOM | 1319 | HH11 | ARG | 84 | -8.941  | 10.353 | -9.379  | 1.00 | 0.00 |
| ATOM | 1320 | HH12 | ARG | 84 | -7.810  | 10.645 | -10.686 | 1.00 | 0.00 |
| ATOM | 1321 | NH2  | ARG | 84 | -6.761  | 12.654 | -9.686  | 1.00 | 0.00 |
| ATOM | 1322 | HH21 | ARG | 84 | -6.394  | 13.456 | -9.195  | 1.00 | 0.00 |
| ATOM | 1323 | HH22 | ARG | 84 | -6.381  | 12.385 | -10.583 | 1.00 | 0.00 |

|      |      |      |     |    |        |        |        |      |      |
|------|------|------|-----|----|--------|--------|--------|------|------|
| ATOM | 1324 | C    | ARG | 84 | -9.407 | 9.455  | -4.379 | 1.00 | 0.00 |
| ATOM | 1325 | O    | ARG | 84 | -8.688 | 8.860  | -5.162 | 1.00 | 0.00 |
| ATOM | 1326 | N    | ILE | 85 | -9.242 | 9.386  | -3.066 | 1.00 | 0.00 |
| ATOM | 1327 | H    | ILE | 85 | -9.777 | 10.033 | -2.505 | 1.00 | 0.00 |
| ATOM | 1328 | CA   | ILE | 85 | -8.294 | 8.532  | -2.404 | 1.00 | 0.00 |
| ATOM | 1329 | HA   | ILE | 85 | -7.262 | 8.844  | -2.564 | 1.00 | 0.00 |
| ATOM | 1330 | CB   | ILE | 85 | -8.576 | 8.449  | -0.898 | 1.00 | 0.00 |
| ATOM | 1331 | HB   | ILE | 85 | -9.654 | 8.491  | -0.741 | 1.00 | 0.00 |
| ATOM | 1332 | CG2  | ILE | 85 | -8.028 | 7.155  | -0.310 | 1.00 | 0.00 |
| ATOM | 1333 | HG21 | ILE | 85 | -6.950 | 7.112  | -0.466 | 1.00 | 0.00 |
| ATOM | 1334 | HG22 | ILE | 85 | -8.241 | 7.121  | 0.758  | 1.00 | 0.00 |
| ATOM | 1335 | HG23 | ILE | 85 | -8.500 | 6.303  | -0.801 | 1.00 | 0.00 |
| ATOM | 1336 | CG1  | ILE | 85 | -8.034 | 9.691  | -0.169 | 1.00 | 0.00 |
| ATOM | 1337 | HG12 | ILE | 85 | -8.575 | 10.566 | -0.528 | 1.00 | 0.00 |
| ATOM | 1338 | HG13 | ILE | 85 | -8.210 | 9.569  | 0.900  | 1.00 | 0.00 |
| ATOM | 1339 | CD1  | ILE | 85 | -6.539 | 9.878  | -0.421 | 1.00 | 0.00 |
| ATOM | 1340 | HD11 | ILE | 85 | -6.363 | 10.000 | -1.490 | 1.00 | 0.00 |
| ATOM | 1341 | HD12 | ILE | 85 | -6.189 | 10.764 | 0.108  | 1.00 | 0.00 |
| ATOM | 1342 | HD13 | ILE | 85 | -5.997 | 9.003  | -0.062 | 1.00 | 0.00 |
| ATOM | 1343 | C    | ILE | 85 | -8.288 | 7.167  | -3.063 | 1.00 | 0.00 |
| ATOM | 1344 | O    | ILE | 85 | -7.234 | 6.585  | -3.214 | 1.00 | 0.00 |
| ATOM | 1345 | N    | TYR | 86 | -9.434 | 6.710  | -3.542 | 1.00 | 0.00 |

|      |      |     |     |    |         |       |        |      |      |
|------|------|-----|-----|----|---------|-------|--------|------|------|
| ATOM | 1346 | H   | TYR | 86 | -10.249 | 7.296 | -3.432 | 1.00 | 0.00 |
| ATOM | 1347 | CA  | TYR | 86 | -9.582  | 5.466 | -4.228 | 1.00 | 0.00 |
| ATOM | 1348 | HA  | TYR | 86 | -8.896  | 4.712 | -3.842 | 1.00 | 0.00 |
| ATOM | 1349 | CB  | TYR | 86 | -11.008 | 4.993 | -3.989 | 1.00 | 0.00 |
| ATOM | 1350 | HB2 | TYR | 86 | -11.628 | 5.888 | -3.949 | 1.00 | 0.00 |
| ATOM | 1351 | HB3 | TYR | 86 | -11.300 | 4.386 | -4.847 | 1.00 | 0.00 |
| ATOM | 1352 | CG  | TYR | 86 | -11.196 | 4.192 | -2.717 | 1.00 | 0.00 |
| ATOM | 1353 | CD1 | TYR | 86 | -10.884 | 4.751 | -1.466 | 1.00 | 0.00 |
| ATOM | 1354 | HD1 | TYR | 86 | -10.507 | 5.772 | -1.420 | 1.00 | 0.00 |
| ATOM | 1355 | CE1 | TYR | 86 | -11.052 | 4.011 | -0.286 | 1.00 | 0.00 |
| ATOM | 1356 | HE1 | TYR | 86 | -10.773 | 4.428 | 0.681  | 1.00 | 0.00 |
| ATOM | 1357 | CZ  | TYR | 86 | -11.537 | 2.698 | -0.370 | 1.00 | 0.00 |
| ATOM | 1358 | OH  | TYR | 86 | -11.749 | 2.005 | 0.774  | 1.00 | 0.00 |
| ATOM | 1359 | HH  | TYR | 86 | -11.535 | 2.508 | 1.563  | 1.00 | 0.00 |
| ATOM | 1360 | CE2 | TYR | 86 | -11.852 | 2.119 | -1.611 | 1.00 | 0.00 |
| ATOM | 1361 | HE2 | TYR | 86 | -12.230 | 1.098 | -1.670 | 1.00 | 0.00 |
| ATOM | 1362 | CD2 | TYR | 86 | -11.674 | 2.872 | -2.787 | 1.00 | 0.00 |
| ATOM | 1363 | HD2 | TYR | 86 | -11.907 | 2.431 | -3.757 | 1.00 | 0.00 |
| ATOM | 1364 | C   | TYR | 86 | -9.375  | 5.633 | -5.709 | 1.00 | 0.00 |
| ATOM | 1365 | O   | TYR | 86 | -8.708  | 4.831 | -6.343 | 1.00 | 0.00 |
| ATOM | 1366 | N   | GLN | 87 | -9.880  | 6.716 | -6.292 | 1.00 | 0.00 |
| ATOM | 1367 | H   | GLN | 87 | -10.440 | 7.344 | -5.733 | 1.00 | 0.00 |

|      |      |      |     |    |         |       |         |      |      |
|------|------|------|-----|----|---------|-------|---------|------|------|
| ATOM | 1368 | CA   | GLN | 87 | -9.712  | 7.013 | -7.690  | 1.00 | 0.00 |
| ATOM | 1369 | HA   | GLN | 87 | -10.042 | 6.164 | -8.289  | 1.00 | 0.00 |
| ATOM | 1370 | CB   | GLN | 87 | -10.536 | 8.235 | -8.081  | 1.00 | 0.00 |
| ATOM | 1371 | HB2  | GLN | 87 | -11.257 | 8.442 | -7.291  | 1.00 | 0.00 |
| ATOM | 1372 | HB3  | GLN | 87 | -9.868  | 9.089 | -8.196  | 1.00 | 0.00 |
| ATOM | 1373 | CG   | GLN | 87 | -11.278 | 7.988 | -9.396  | 1.00 | 0.00 |
| ATOM | 1374 | HG2  | GLN | 87 | -10.660 | 8.049 | -10.292 | 1.00 | 0.00 |
| ATOM | 1375 | HG3  | GLN | 87 | -11.653 | 6.971 | -9.283  | 1.00 | 0.00 |
| ATOM | 1376 | CD   | GLN | 87 | -12.464 | 8.929 | -9.557  | 1.00 | 0.00 |
| ATOM | 1377 | OE1  | GLN | 87 | -12.514 | 9.995 | -8.954  | 1.00 | 0.00 |
| ATOM | 1378 | NE2  | GLN | 87 | -13.330 | 8.595 | -10.479 | 1.00 | 0.00 |
| ATOM | 1379 | HE21 | GLN | 87 | -14.141 | 9.175 | -10.640 | 1.00 | 0.00 |
| ATOM | 1380 | HE22 | GLN | 87 | -13.183 | 7.758 | -11.026 | 1.00 | 0.00 |
| ATOM | 1381 | C    | GLN | 87 | -8.249  | 7.242 | -8.019  | 1.00 | 0.00 |
| ATOM | 1382 | O    | GLN | 87 | -7.874  | 7.340 | -9.181  | 1.00 | 0.00 |
| ATOM | 1383 | N    | ILE | 88 | -7.384  | 7.351 | -7.025  | 1.00 | 0.00 |
| ATOM | 1384 | H    | ILE | 88 | -7.757  | 7.357 | -6.086  | 1.00 | 0.00 |
| ATOM | 1385 | CA   | ILE | 88 | -5.971  | 7.533 | -7.197  | 1.00 | 0.00 |
| ATOM | 1386 | HA   | ILE | 88 | -5.695  | 7.533 | -8.252  | 1.00 | 0.00 |
| ATOM | 1387 | CB   | ILE | 88 | -5.545  | 8.856 | -6.558  | 1.00 | 0.00 |
| ATOM | 1388 | HB   | ILE | 88 | -5.888  | 8.874 | -5.524  | 1.00 | 0.00 |
| ATOM | 1389 | CG2  | ILE | 88 | -4.026  | 9.008 | -6.593  | 1.00 | 0.00 |

|      |      |      |     |    |        |        |        |      |      |
|------|------|------|-----|----|--------|--------|--------|------|------|
| ATOM | 1390 | HG21 | ILE | 88 | -3.682 | 8.990  | -7.627 | 1.00 | 0.00 |
| ATOM | 1391 | HG22 | ILE | 88 | -3.745 | 9.955  | -6.134 | 1.00 | 0.00 |
| ATOM | 1392 | HG23 | ILE | 88 | -3.565 | 8.187  | -6.043 | 1.00 | 0.00 |
| ATOM | 1393 | CG1  | ILE | 88 | -6.211 | 10.035 | -7.272 | 1.00 | 0.00 |
| ATOM | 1394 | HG12 | ILE | 88 | -5.668 | 10.250 | -8.192 | 1.00 | 0.00 |
| ATOM | 1395 | HG13 | ILE | 88 | -7.242 | 9.773  | -7.512 | 1.00 | 0.00 |
| ATOM | 1396 | CD1  | ILE | 88 | -6.196 | 11.275 | -6.367 | 1.00 | 0.00 |
| ATOM | 1397 | HD11 | ILE | 88 | -5.166 | 11.537 | -6.127 | 1.00 | 0.00 |
| ATOM | 1398 | HD12 | ILE | 88 | -6.672 | 12.108 | -6.884 | 1.00 | 0.00 |
| ATOM | 1399 | HD13 | ILE | 88 | -6.740 | 11.060 | -5.447 | 1.00 | 0.00 |
| ATOM | 1400 | C    | ILE | 88 | -5.246 | 6.341  | -6.607 | 1.00 | 0.00 |
| ATOM | 1401 | O    | ILE | 88 | -4.063 | 6.185  | -6.820 | 1.00 | 0.00 |
| ATOM | 1402 | N    | ALA | 89 | -5.946 | 5.480  | -5.889 | 1.00 | 0.00 |
| ATOM | 1403 | H    | ALA | 89 | -6.911 | 5.697  | -5.682 | 1.00 | 0.00 |
| ATOM | 1404 | CA   | ALA | 89 | -5.379 | 4.282  | -5.323 | 1.00 | 0.00 |
| ATOM | 1405 | HA   | ALA | 89 | -4.290 | 4.329  | -5.350 | 1.00 | 0.00 |
| ATOM | 1406 | CB   | ALA | 89 | -5.824 | 4.161  | -3.875 | 1.00 | 0.00 |
| ATOM | 1407 | HB1  | ALA | 89 | -6.912 | 4.103  | -3.832 | 1.00 | 0.00 |
| ATOM | 1408 | HB2  | ALA | 89 | -5.396 | 3.259  | -3.437 | 1.00 | 0.00 |
| ATOM | 1409 | HB3  | ALA | 89 | -5.485 | 5.033  | -3.316 | 1.00 | 0.00 |
| ATOM | 1410 | C    | ALA | 89 | -5.779 | 3.074  | -6.153 | 1.00 | 0.00 |
| ATOM | 1411 | O    | ALA | 89 | -5.443 | 1.940  | -5.824 | 1.00 | 0.00 |

|      |      |     |     |    |        |       |         |      |      |
|------|------|-----|-----|----|--------|-------|---------|------|------|
| ATOM | 1412 | N   | LYS | 90 | -6.494 | 3.314 | -7.258  | 1.00 | 0.00 |
| ATOM | 1413 | H   | LYS | 90 | -6.799 | 4.259 | -7.443  | 1.00 | 0.00 |
| ATOM | 1414 | CA  | LYS | 90 | -6.945 | 2.261 | -8.144  | 1.00 | 0.00 |
| ATOM | 1415 | HA  | LYS | 90 | -6.898 | 1.300 | -7.632  | 1.00 | 0.00 |
| ATOM | 1416 | CB  | LYS | 90 | -8.395 | 2.515 | -8.578  | 1.00 | 0.00 |
| ATOM | 1417 | HB2 | LYS | 90 | -8.912 | 1.555 | -8.594  | 1.00 | 0.00 |
| ATOM | 1418 | HB3 | LYS | 90 | -8.857 | 3.164 | -7.834  | 1.00 | 0.00 |
| ATOM | 1419 | CG  | LYS | 90 | -8.493 | 3.165 | -9.948  | 1.00 | 0.00 |
| ATOM | 1420 | HG2 | LYS | 90 | -7.910 | 2.574 | -10.655 | 1.00 | 0.00 |
| ATOM | 1421 | HG3 | LYS | 90 | -9.539 | 3.169 | -10.256 | 1.00 | 0.00 |
| ATOM | 1422 | CD  | LYS | 90 | -7.969 | 4.583 | -9.923  | 1.00 | 0.00 |
| ATOM | 1423 | HD2 | LYS | 90 | -8.654 | 5.201 | -9.342  | 1.00 | 0.00 |
| ATOM | 1424 | HD3 | LYS | 90 | -6.987 | 4.586 | -9.450  | 1.00 | 0.00 |
| ATOM | 1425 | CE  | LYS | 90 | -7.854 | 5.144 | -11.339 | 1.00 | 0.00 |
| ATOM | 1426 | HE2 | LYS | 90 | -7.429 | 4.375 | -11.985 | 1.00 | 0.00 |
| ATOM | 1427 | HE3 | LYS | 90 | -8.852 | 5.403 | -11.693 | 1.00 | 0.00 |
| ATOM | 1428 | NZ  | LYS | 90 | -6.996 | 6.341 | -11.370 | 1.00 | 0.00 |
| ATOM | 1429 | HZ1 | LYS | 90 | -6.071 | 6.101 | -11.043 | 1.00 | 0.00 |
| ATOM | 1430 | HZ2 | LYS | 90 | -6.938 | 6.689 | -12.316 | 1.00 | 0.00 |
| ATOM | 1431 | HZ3 | LYS | 90 | -7.390 | 7.053 | -10.773 | 1.00 | 0.00 |
| ATOM | 1432 | C   | LYS | 90 | -5.988 | 2.141 | -9.301  | 1.00 | 0.00 |
| ATOM | 1433 | O   | LYS | 90 | -6.006 | 1.167 | -10.035 | 1.00 | 0.00 |

|      |      |      |     |    |        |       |         |      |      |
|------|------|------|-----|----|--------|-------|---------|------|------|
| ATOM | 1434 | N    | ASN | 91 | -5.184 | 3.190 | -9.519  | 1.00 | 0.00 |
| ATOM | 1435 | H    | ASN | 91 | -5.281 | 4.005 | -8.931  | 1.00 | 0.00 |
| ATOM | 1436 | CA   | ASN | 91 | -4.202 | 3.219 | -10.566 | 1.00 | 0.00 |
| ATOM | 1437 | HA   | ASN | 91 | -4.523 | 2.582 | -11.391 | 1.00 | 0.00 |
| ATOM | 1438 | CB   | ASN | 91 | -4.019 | 4.644 | -11.091 | 1.00 | 0.00 |
| ATOM | 1439 | HB2  | ASN | 91 | -3.141 | 4.632 | -11.736 | 1.00 | 0.00 |
| ATOM | 1440 | HB3  | ASN | 91 | -4.888 | 4.962 | -11.667 | 1.00 | 0.00 |
| ATOM | 1441 | CG   | ASN | 91 | -3.788 | 5.635 | -9.982  | 1.00 | 0.00 |
| ATOM | 1442 | OD1  | ASN | 91 | -3.146 | 5.334 | -9.005  | 1.00 | 0.00 |
| ATOM | 1443 | ND2  | ASN | 91 | -4.373 | 6.808 | -10.134 | 1.00 | 0.00 |
| ATOM | 1444 | HD21 | ASN | 91 | -4.260 | 7.520 | -9.427  | 1.00 | 0.00 |
| ATOM | 1445 | HD22 | ASN | 91 | -4.931 | 6.987 | -10.957 | 1.00 | 0.00 |
| ATOM | 1446 | C    | ASN | 91 | -2.864 | 2.696 | -10.053 | 1.00 | 0.00 |
| ATOM | 1447 | O    | ASN | 91 | -1.868 | 2.731 | -10.767 | 1.00 | 0.00 |
| ATOM | 1448 | N    | LEU | 92 | -2.829 | 2.293 | -8.787  | 1.00 | 0.00 |
| ATOM | 1449 | H    | LEU | 92 | -3.648 | 2.422 | -8.210  | 1.00 | 0.00 |
| ATOM | 1450 | CA   | LEU | 92 | -1.647 | 1.743 | -8.179  | 1.00 | 0.00 |
| ATOM | 1451 | HA   | LEU | 92 | -0.775 | 2.338 | -8.449  | 1.00 | 0.00 |
| ATOM | 1452 | CB   | LEU | 92 | -1.795 | 1.754 | -6.651  | 1.00 | 0.00 |
| ATOM | 1453 | HB2  | LEU | 92 | -2.872 | 1.771 | -6.486  | 1.00 | 0.00 |
| ATOM | 1454 | HB3  | LEU | 92 | -1.377 | 0.841 | -6.226  | 1.00 | 0.00 |
| ATOM | 1455 | CG   | LEU | 92 | -1.155 | 2.972 | -5.975  | 1.00 | 0.00 |



|      |      |      |     |    |        |        |        |      |      |
|------|------|------|-----|----|--------|--------|--------|------|------|
| ATOM | 1456 | HG   | LEU | 92 | -1.337 | 3.856  | -6.586 | 1.00 | 0.00 |
| ATOM | 1457 | CD1  | LEU | 92 | -1.756 | 3.182  | -4.583 | 1.00 | 0.00 |
| ATOM | 1458 | HD11 | LEU | 92 | -1.574 | 2.298  | -3.971 | 1.00 | 0.00 |
| ATOM | 1459 | HD12 | LEU | 92 | -1.293 | 4.050  | -4.114 | 1.00 | 0.00 |
| ATOM | 1460 | HD13 | LEU | 92 | -2.830 | 3.347  | -4.672 | 1.00 | 0.00 |
| ATOM | 1461 | CD2  | LEU | 92 | 0.361  | 2.828  | -5.906 | 1.00 | 0.00 |
| ATOM | 1462 | HD21 | LEU | 92 | 0.764  | 2.737  | -6.915 | 1.00 | 0.00 |
| ATOM | 1463 | HD22 | LEU | 92 | 0.788  | 3.706  | -5.422 | 1.00 | 0.00 |
| ATOM | 1464 | HD23 | LEU | 92 | 0.616  | 1.937  | -5.332 | 1.00 | 0.00 |
| ATOM | 1465 | C    | LEU | 92 | -1.391 | 0.344  | -8.709 | 1.00 | 0.00 |
| ATOM | 1466 | O    | LEU | 92 | -0.309 | 0.085  | -9.194 | 1.00 | 0.00 |
| ATOM | 1467 | N    | PRO | 93 | -2.407 | -0.533 | -8.698 | 1.00 | 0.00 |
| ATOM | 1468 | CD   | PRO | 93 | -3.751 | -0.282 | -8.205 | 1.00 | 0.00 |
| ATOM | 1469 | HD2  | PRO | 93 | -4.212 | 0.448  | -8.870 | 1.00 | 0.00 |
| ATOM | 1470 | HD3  | PRO | 93 | -3.659 | 0.144  | -7.206 | 1.00 | 0.00 |
| ATOM | 1471 | CG   | PRO | 93 | -4.482 | -1.607 | -8.202 | 1.00 | 0.00 |
| ATOM | 1472 | HG2  | PRO | 93 | -5.322 | -1.556 | -8.895 | 1.00 | 0.00 |
| ATOM | 1473 | HG3  | PRO | 93 | -4.853 | -1.811 | -7.198 | 1.00 | 0.00 |
| ATOM | 1474 | CB   | PRO | 93 | -3.464 | -2.665 | -8.634 | 1.00 | 0.00 |
| ATOM | 1475 | HB2  | PRO | 93 | -3.875 | -3.340 | -9.385 | 1.00 | 0.00 |
| ATOM | 1476 | HB3  | PRO | 93 | -3.126 | -3.242 | -7.774 | 1.00 | 0.00 |
| ATOM | 1477 | CA   | PRO | 93 | -2.295 | -1.879 | -9.227 | 1.00 | 0.00 |

|      |      |      |     |    |        |        |         |      |      |
|------|------|------|-----|----|--------|--------|---------|------|------|
| ATOM | 1478 | HA   | PRO | 93 | -1.378 | -2.319 | -8.834  | 1.00 | 0.00 |
| ATOM | 1479 | C    | PRO | 93 | -2.260 | -1.909 | -10.745 | 1.00 | 0.00 |
| ATOM | 1480 | O    | PRO | 93 | -2.137 | -2.976 | -11.342 | 1.00 | 0.00 |
| ATOM | 1481 | N    | ASN | 94 | -2.367 | -0.726 | -11.355 | 1.00 | 0.00 |
| ATOM | 1482 | H    | ASN | 94 | -2.470 | 0.113  | -10.802 | 1.00 | 0.00 |
| ATOM | 1483 | CA   | ASN | 94 | -2.336 | -0.600 | -12.782 | 1.00 | 0.00 |
| ATOM | 1484 | HA   | ASN | 94 | -2.773 | -1.485 | -13.245 | 1.00 | 0.00 |
| ATOM | 1485 | CB   | ASN | 94 | -3.141 | 0.626  | -13.216 | 1.00 | 0.00 |
| ATOM | 1486 | HB2  | ASN | 94 | -2.911 | 1.461  | -12.555 | 1.00 | 0.00 |
| ATOM | 1487 | HB3  | ASN | 94 | -2.861 | 0.884  | -14.237 | 1.00 | 0.00 |
| ATOM | 1488 | CG   | ASN | 94 | -4.630 | 0.371  | -13.173 | 1.00 | 0.00 |
| ATOM | 1489 | OD1  | ASN | 94 | -5.106 | -0.749 | -13.106 | 1.00 | 0.00 |
| ATOM | 1490 | ND2  | ASN | 94 | -5.387 | 1.453  | -13.205 | 1.00 | 0.00 |
| ATOM | 1491 | HD21 | ASN | 94 | -6.393 | 1.363  | -13.180 | 1.00 | 0.00 |
| ATOM | 1492 | HD22 | ASN | 94 | -4.957 | 2.365  | -13.255 | 1.00 | 0.00 |
| ATOM | 1493 | C    | ASN | 94 | -0.907 | -0.437 | -13.258 | 1.00 | 0.00 |
| ATOM | 1494 | O    | ASN | 94 | -0.520 | -0.980 | -14.285 | 1.00 | 0.00 |
| ATOM | 1495 | N    | VAL | 95 | -0.125 | 0.336  | -12.502 | 1.00 | 0.00 |
| ATOM | 1496 | H    | VAL | 95 | -0.521 | 0.815  | -11.706 | 1.00 | 0.00 |
| ATOM | 1497 | CA   | VAL | 95 | 1.268  | 0.576  | -12.825 | 1.00 | 0.00 |
| ATOM | 1498 | HA   | VAL | 95 | 1.529  | 0.211  | -13.819 | 1.00 | 0.00 |
| ATOM | 1499 | CB   | VAL | 95 | 1.557  | 2.077  | -12.763 | 1.00 | 0.00 |

|      |      |      |     |    |        |        |         |      |      |
|------|------|------|-----|----|--------|--------|---------|------|------|
| ATOM | 1500 | HB   | VAL | 95 | 1.422  | 2.417  | -11.736 | 1.00 | 0.00 |
| ATOM | 1501 | CG1  | VAL | 95 | 2.984  | 2.379  | -13.216 | 1.00 | 0.00 |
| ATOM | 1502 | HG11 | VAL | 95 | 3.119  | 2.039  | -14.243 | 1.00 | 0.00 |
| ATOM | 1503 | HG12 | VAL | 95 | 3.163  | 3.452  | -13.162 | 1.00 | 0.00 |
| ATOM | 1504 | HG13 | VAL | 95 | 3.689  | 1.860  | -12.567 | 1.00 | 0.00 |
| ATOM | 1505 | CG2  | VAL | 95 | 0.555  | 2.855  | -13.628 | 1.00 | 0.00 |
| ATOM | 1506 | HG21 | VAL | 95 | -0.457 | 2.674  | -13.264 | 1.00 | 0.00 |
| ATOM | 1507 | HG22 | VAL | 95 | 0.776  | 3.920  | -13.572 | 1.00 | 0.00 |
| ATOM | 1508 | HG23 | VAL | 95 | 0.633  | 2.522  | -14.663 | 1.00 | 0.00 |
| ATOM | 1509 | C    | VAL | 95 | 2.165  | -0.215 | -11.885 | 1.00 | 0.00 |
| ATOM | 1510 | O    | VAL | 95 | 3.372  | -0.281 | -12.067 | 1.00 | 0.00 |
| ATOM | 1511 | N    | CYX | 96 | 1.560  | -0.874 | -10.901 | 1.00 | 0.00 |
| ATOM | 1512 | H    | CYX | 96 | 0.563  | -0.762 | -10.789 | 1.00 | 0.00 |
| ATOM | 1513 | CA   | CYX | 96 | 2.269  | -1.666 | -9.936  | 1.00 | 0.00 |
| ATOM | 1514 | HA   | CYX | 96 | 3.308  | -1.762 | -10.251 | 1.00 | 0.00 |
| ATOM | 1515 | CB   | CYX | 96 | 2.237  | -1.041 | -8.541  | 1.00 | 0.00 |
| ATOM | 1516 | HB2  | CYX | 96 | 1.234  | -1.133 | -8.124  | 1.00 | 0.00 |
| ATOM | 1517 | HB3  | CYX | 96 | 2.947  | -1.557 | -7.895  | 1.00 | 0.00 |
| ATOM | 1518 | SG   | CYX | 96 | 2.658  | 0.694  | -8.506  | 1.00 | 0.00 |
| ATOM | 1519 | C    | CYX | 96 | 1.689  | -3.042 | -9.956  | 1.00 | 0.00 |
| ATOM | 1520 | O    | CYX | 96 | 1.563  | -3.576 | -8.880  | 1.00 | 0.00 |
| ATOM | 1521 | N    | ASN | 97 | 1.312  | -3.565 | -11.134 | 1.00 | 0.00 |

|      |      |      |     |    |        |        |         |      |      |
|------|------|------|-----|----|--------|--------|---------|------|------|
| ATOM | 1522 | H    | ASN | 97 | 1.441  | -2.999 | -11.960 | 1.00 | 0.00 |
| ATOM | 1523 | CA   | ASN | 97 | 0.735  | -4.883 | -11.289 | 1.00 | 0.00 |
| ATOM | 1524 | HA   | ASN | 97 | -0.352 | -4.808 | -11.314 | 1.00 | 0.00 |
| ATOM | 1525 | CB   | ASN | 97 | 1.209  | -5.531 | -12.590 | 1.00 | 0.00 |
| ATOM | 1526 | HB2  | ASN | 97 | 2.191  | -5.150 | -12.870 | 1.00 | 0.00 |
| ATOM | 1527 | HB3  | ASN | 97 | 1.271  | -6.607 | -12.425 | 1.00 | 0.00 |
| ATOM | 1528 | CG   | ASN | 97 | 0.253  | -5.273 | -13.722 | 1.00 | 0.00 |
| ATOM | 1529 | OD1  | ASN | 97 | -0.478 | -6.143 | -14.165 | 1.00 | 0.00 |
| ATOM | 1530 | ND2  | ASN | 97 | 0.243  | -4.037 | -14.171 | 1.00 | 0.00 |
| ATOM | 1531 | HD21 | ASN | 97 | -0.373 | -3.784 | -14.931 | 1.00 | 0.00 |
| ATOM | 1532 | HD22 | ASN | 97 | 0.851  | -3.347 | -13.754 | 1.00 | 0.00 |
| ATOM | 1533 | C    | ASN | 97 | 1.131  | -5.802 | -10.135 | 1.00 | 0.00 |
| ATOM | 1534 | O    | ASN | 97 | 2.234  | -6.349 | -10.129 | 1.00 | 0.00 |
| ATOM | 1535 | N    | MET | 98 | 0.262  | -5.881 | -9.130  | 1.00 | 0.00 |
| ATOM | 1536 | H    | MET | 98 | -0.613 | -5.379 | -9.182  | 1.00 | 0.00 |
| ATOM | 1537 | CA   | MET | 98 | 0.562  | -6.611 | -7.919  | 1.00 | 0.00 |
| ATOM | 1538 | HA   | MET | 98 | 1.410  | -7.272 | -8.101  | 1.00 | 0.00 |
| ATOM | 1539 | CB   | MET | 98 | 0.911  | -5.676 | -6.763  | 1.00 | 0.00 |
| ATOM | 1540 | HB2  | MET | 98 | 1.250  | -6.276 | -5.918  | 1.00 | 0.00 |
| ATOM | 1541 | HB3  | MET | 98 | 1.713  | -5.010 | -7.081  | 1.00 | 0.00 |
| ATOM | 1542 | CG   | MET | 98 | -0.300 | -4.849 | -6.345  | 1.00 | 0.00 |
| ATOM | 1543 | HG2  | MET | 98 | -1.164 | -5.198 | -6.910  | 1.00 | 0.00 |

|      |      |         |    |        |        |         |      |      |
|------|------|---------|----|--------|--------|---------|------|------|
| ATOM | 1544 | HG3 MET | 98 | -0.474 | -5.010 | -5.281  | 1.00 | 0.00 |
| ATOM | 1545 | SD MET  | 98 | -0.067 | -3.104 | -6.645  | 1.00 | 0.00 |
| ATOM | 1546 | CE MET  | 98 | -1.400 | -2.409 | -5.711  | 1.00 | 0.00 |
| ATOM | 1547 | HE1 MET | 98 | -1.292 | -2.686 | -4.662  | 1.00 | 0.00 |
| ATOM | 1548 | HE2 MET | 98 | -1.382 | -1.323 | -5.804  | 1.00 | 0.00 |
| ATOM | 1549 | HE3 MET | 98 | -2.348 | -2.790 | -6.091  | 1.00 | 0.00 |
| ATOM | 1550 | C MET   | 98 | -0.613 | -7.492 | -7.576  | 1.00 | 0.00 |
| ATOM | 1551 | O MET   | 98 | -0.684 | -8.060 | -6.496  | 1.00 | 0.00 |
| ATOM | 1552 | N LYS   | 99 | -1.597 | -7.572 | -8.480  | 1.00 | 0.00 |
| ATOM | 1553 | H LYS   | 99 | -1.550 | -6.963 | -9.285  | 1.00 | 0.00 |
| ATOM | 1554 | CA LYS  | 99 | -2.786 | -8.356 | -8.288  | 1.00 | 0.00 |
| ATOM | 1555 | HA LYS  | 99 | -2.586 | -9.182 | -7.605  | 1.00 | 0.00 |
| ATOM | 1556 | CB LYS  | 99 | -3.894 | -7.479 | -7.686  | 1.00 | 0.00 |
| ATOM | 1557 | HB2 LYS | 99 | -3.824 | -7.530 | -6.600  | 1.00 | 0.00 |
| ATOM | 1558 | HB3 LYS | 99 | -3.737 | -6.451 | -8.012  | 1.00 | 0.00 |
| ATOM | 1559 | CG LYS  | 99 | -5.286 | -7.950 | -8.131  | 1.00 | 0.00 |
| ATOM | 1560 | HG2 LYS | 99 | -5.221 | -8.984 | -8.471  | 1.00 | 0.00 |
| ATOM | 1561 | HG3 LYS | 99 | -5.970 | -7.889 | -7.285  | 1.00 | 0.00 |
| ATOM | 1562 | CD LYS  | 99 | -5.809 | -7.063 | -9.280  | 1.00 | 0.00 |
| ATOM | 1563 | HD2 LYS | 99 | -6.526 | -6.351 | -8.872  | 1.00 | 0.00 |
| ATOM | 1564 | HD3 LYS | 99 | -4.968 | -6.523 | -9.714  | 1.00 | 0.00 |
| ATOM | 1565 | CE LYS  | 99 | -6.492 | -7.912 | -10.371 | 1.00 | 0.00 |

|      |      |      |     |     |        |         |         |      |      |
|------|------|------|-----|-----|--------|---------|---------|------|------|
| ATOM | 1566 | HE2  | LYS | 99  | -6.329 | -8.966  | -10.144 | 1.00 | 0.00 |
| ATOM | 1567 | HE3  | LYS | 99  | -7.561 | -7.699  | -10.359 | 1.00 | 0.00 |
| ATOM | 1568 | NZ   | LYS | 99  | -5.944 | -7.606  | -11.710 | 1.00 | 0.00 |
| ATOM | 1569 | HZ1  | LYS | 99  | -4.954 | -7.804  | -11.722 | 1.00 | 0.00 |
| ATOM | 1570 | HZ2  | LYS | 99  | -6.409 | -8.176  | -12.402 | 1.00 | 0.00 |
| ATOM | 1571 | HZ3  | LYS | 99  | -6.095 | -6.630  | -11.921 | 1.00 | 0.00 |
| ATOM | 1572 | C    | LYS | 99  | -3.122 | -9.047  | -9.590  | 1.00 | 0.00 |
| ATOM | 1573 | O    | LYS | 99  | -3.811 | -8.514  | -10.436 | 1.00 | 0.00 |
| ATOM | 1574 | N    | GLN | 100 | -2.617 | -10.239 | -9.799  | 1.00 | 0.00 |
| ATOM | 1575 | H    | GLN | 100 | -1.974 | -10.644 | -9.134  | 1.00 | 0.00 |
| ATOM | 1576 | CA   | GLN | 100 | -2.913 | -10.980 | -11.003 | 1.00 | 0.00 |
| ATOM | 1577 | HA   | GLN | 100 | -2.845 | -10.327 | -11.873 | 1.00 | 0.00 |
| ATOM | 1578 | CB   | GLN | 100 | -1.905 | -12.123 | -11.168 | 1.00 | 0.00 |
| ATOM | 1579 | HB2  | GLN | 100 | -0.996 | -11.880 | -10.618 | 1.00 | 0.00 |
| ATOM | 1580 | HB3  | GLN | 100 | -2.337 | -13.041 | -10.768 | 1.00 | 0.00 |
| ATOM | 1581 | CG   | GLN | 100 | -1.567 | -12.321 | -12.650 | 1.00 | 0.00 |
| ATOM | 1582 | HG2  | GLN | 100 | -1.434 | -11.329 | -13.081 | 1.00 | 0.00 |
| ATOM | 1583 | HG3  | GLN | 100 | -0.645 | -12.892 | -12.761 | 1.00 | 0.00 |
| ATOM | 1584 | CD   | GLN | 100 | -2.677 | -13.037 | -13.410 | 1.00 | 0.00 |
| ATOM | 1585 | OE1  | GLN | 100 | -3.737 | -13.346 | -12.904 | 1.00 | 0.00 |
| ATOM | 1586 | NE2  | GLN | 100 | -2.413 | -13.355 | -14.655 | 1.00 | 0.00 |
| ATOM | 1587 | HE21 | GLN | 100 | -3.110 | -13.831 | -15.210 | 1.00 | 0.00 |

|      |      |      |     |     |        |         |         |      |      |
|------|------|------|-----|-----|--------|---------|---------|------|------|
| ATOM | 1588 | HE22 | GLN | 100 | -1.514 | -13.123 | -15.053 | 1.00 | 0.00 |
| ATOM | 1589 | C    | GLN | 100 | -4.337 | -11.511 | -10.965 | 1.00 | 0.00 |
| ATOM | 1590 | O    | GLN | 100 | -5.098 | -11.300 | -11.902 | 1.00 | 0.00 |
| ATOM | 1591 | N    | ILE | 101 | -4.688 | -12.154 | -9.851  | 1.00 | 0.00 |
| ATOM | 1592 | H    | ILE | 101 | -3.990 | -12.343 | -9.146  | 1.00 | 0.00 |
| ATOM | 1593 | CA   | ILE | 101 | -6.005 | -12.704 | -9.671  | 1.00 | 0.00 |
| ATOM | 1594 | HA   | ILE | 101 | -6.314 | -13.317 | -10.518 | 1.00 | 0.00 |
| ATOM | 1595 | CB   | ILE | 101 | -6.083 | -13.538 | -8.379  | 1.00 | 0.00 |
| ATOM | 1596 | HB   | ILE | 101 | -5.657 | -14.523 | -8.569  | 1.00 | 0.00 |
| ATOM | 1597 | CG2  | ILE | 101 | -5.314 | -12.861 | -7.255  | 1.00 | 0.00 |
| ATOM | 1598 | HG21 | ILE | 101 | -5.740 | -11.876 | -7.065  | 1.00 | 0.00 |
| ATOM | 1599 | HG22 | ILE | 101 | -5.382 | -13.467 | -6.352  | 1.00 | 0.00 |
| ATOM | 1600 | HG23 | ILE | 101 | -4.268 | -12.755 | -7.543  | 1.00 | 0.00 |
| ATOM | 1601 | CG1  | ILE | 101 | -7.538 | -13.813 | -7.965  | 1.00 | 0.00 |
| ATOM | 1602 | HG12 | ILE | 101 | -7.557 | -14.673 | -7.295  | 1.00 | 0.00 |
| ATOM | 1603 | HG13 | ILE | 101 | -7.927 | -12.939 | -7.444  | 1.00 | 0.00 |
| ATOM | 1604 | CD1  | ILE | 101 | -8.407 | -14.104 | -9.195  | 1.00 | 0.00 |
| ATOM | 1605 | HD11 | ILE | 101 | -8.018 | -14.979 | -9.716  | 1.00 | 0.00 |
| ATOM | 1606 | HD12 | ILE | 101 | -9.432 | -14.296 | -8.879  | 1.00 | 0.00 |
| ATOM | 1607 | HD13 | ILE | 101 | -8.389 | -13.245 | -9.865  | 1.00 | 0.00 |
| ATOM | 1608 | C    | ILE | 101 | -7.036 | -11.573 | -9.734  | 1.00 | 0.00 |
| ATOM | 1609 | O    | ILE | 101 | -7.560 | -11.239 | -10.791 | 1.00 | 0.00 |

|      |      |      |     |     |         |         |        |      |      |
|------|------|------|-----|-----|---------|---------|--------|------|------|
| ATOM | 1610 | N    | GLY | 102 | -7.335  | -10.958 | -8.585 | 1.00 | 0.00 |
| ATOM | 1611 | H    | GLY | 102 | -6.842  | -11.224 | -7.744 | 1.00 | 0.00 |
| ATOM | 1612 | CA   | GLY | 102 | -8.333  | -9.929  | -8.493 | 1.00 | 0.00 |
| ATOM | 1613 | HA2  | GLY | 102 | -7.866  | -8.967  | -8.704 | 1.00 | 0.00 |
| ATOM | 1614 | HA3  | GLY | 102 | -9.109  | -10.126 | -9.233 | 1.00 | 0.00 |
| ATOM | 1615 | C    | GLY | 102 | -8.961  | -9.879  | -7.127 | 1.00 | 0.00 |
| ATOM | 1616 | O    | GLY | 102 | -10.059 | -10.345 | -6.892 | 1.00 | 0.00 |
| ATOM | 1617 | N    | THR | 103 | -8.248  | -9.287  | -6.189 | 1.00 | 0.00 |
| ATOM | 1618 | H    | THR | 103 | -7.332  | -8.940  | -6.434 | 1.00 | 0.00 |
| ATOM | 1619 | CA   | THR | 103 | -8.681  | -9.176  | -4.801 | 1.00 | 0.00 |
| ATOM | 1620 | HA   | THR | 103 | -9.239  | -10.088 | -4.587 | 1.00 | 0.00 |
| ATOM | 1621 | CB   | THR | 103 | -7.441  | -9.139  | -3.904 | 1.00 | 0.00 |
| ATOM | 1622 | HB   | THR | 103 | -7.457  | -8.210  | -3.335 | 1.00 | 0.00 |
| ATOM | 1623 | CG2  | THR | 103 | -7.404  | -10.324 | -2.942 | 1.00 | 0.00 |
| ATOM | 1624 | HG21 | THR | 103 | -7.388  | -11.254 | -3.511 | 1.00 | 0.00 |
| ATOM | 1625 | HG22 | THR | 103 | -6.509  | -10.262 | -2.323 | 1.00 | 0.00 |
| ATOM | 1626 | HG23 | THR | 103 | -8.288  | -10.304 | -2.305 | 1.00 | 0.00 |
| ATOM | 1627 | OG1  | THR | 103 | -6.289  | -9.316  | -4.728 | 1.00 | 0.00 |
| ATOM | 1628 | HG1  | THR | 103 | -5.499  | -9.296  | -4.183 | 1.00 | 0.00 |
| ATOM | 1629 | C    | THR | 103 | -9.560  | -7.952  | -4.635 | 1.00 | 0.00 |
| ATOM | 1630 | O    | THR | 103 | -10.678 | -8.049  | -4.131 | 1.00 | 0.00 |
| ATOM | 1631 | N    | CYX | 104 | -9.072  | -6.793  | -5.098 | 1.00 | 0.00 |



|      |      |     |     |     |         |        |         |      |      |
|------|------|-----|-----|-----|---------|--------|---------|------|------|
| ATOM | 1632 | H   | CYX | 104 | -8.113  | -6.756 | -5.413  | 1.00 | 0.00 |
| ATOM | 1633 | CA  | CYX | 104 | -9.834  | -5.560 | -5.069  | 1.00 | 0.00 |
| ATOM | 1634 | HA  | CYX | 104 | -10.873 | -5.772 | -4.817  | 1.00 | 0.00 |
| ATOM | 1635 | CB  | CYX | 104 | -9.260  | -4.605 | -4.018  | 1.00 | 0.00 |
| ATOM | 1636 | HB2 | CYX | 104 | -9.983  | -3.817 | -3.809  | 1.00 | 0.00 |
| ATOM | 1637 | HB3 | CYX | 104 | -9.050  | -5.157 | -3.102  | 1.00 | 0.00 |
| ATOM | 1638 | SG  | CYX | 104 | -7.685  | -3.758 | -4.434  | 1.00 | 0.00 |
| ATOM | 1639 | C   | CYX | 104 | -9.870  | -4.958 | -6.466  | 1.00 | 0.00 |
| ATOM | 1640 | O   | CYX | 104 | -9.259  | -3.931 | -6.735  | 1.00 | 0.00 |
| ATOM | 1641 | N   | PRO | 105 | -10.536 | -5.635 | -7.403  | 1.00 | 0.00 |
| ATOM | 1642 | CD  | PRO | 105 | -11.269 | -6.875 | -7.206  | 1.00 | 0.00 |
| ATOM | 1643 | HD2 | PRO | 105 | -12.120 | -6.660 | -6.559  | 1.00 | 0.00 |
| ATOM | 1644 | HD3 | PRO | 105 | -10.604 | -7.581 | -6.708  | 1.00 | 0.00 |
| ATOM | 1645 | CG  | PRO | 105 | -11.693 | -7.354 | -8.592  | 1.00 | 0.00 |
| ATOM | 1646 | HG2 | PRO | 105 | -12.782 | -7.370 | -8.646  | 1.00 | 0.00 |
| ATOM | 1647 | HG3 | PRO | 105 | -11.308 | -8.361 | -8.755  | 1.00 | 0.00 |
| ATOM | 1648 | CB  | PRO | 105 | -11.097 | -6.371 | -9.602  | 1.00 | 0.00 |
| ATOM | 1649 | HB2 | PRO | 105 | -11.822 | -6.061 | -10.354 | 1.00 | 0.00 |
| ATOM | 1650 | HB3 | PRO | 105 | -10.231 | -6.813 | -10.094 | 1.00 | 0.00 |
| ATOM | 1651 | CA  | PRO | 105 | -10.665 | -5.166 | -8.769  | 1.00 | 0.00 |
| ATOM | 1652 | HA  | PRO | 105 | -9.673  | -4.886 | -9.124  | 1.00 | 0.00 |
| ATOM | 1653 | C   | PRO | 105 | -11.602 | -3.973 | -8.888  | 1.00 | 0.00 |

|      |      |     |     |     |         |        |        |      |      |
|------|------|-----|-----|-----|---------|--------|--------|------|------|
| ATOM | 1654 | O   | PRO | 105 | -12.550 | -3.976 | -9.663 | 1.00 | 0.00 |
| ATOM | 1655 | N   | PHE | 106 | -11.353 | -2.948 | -8.083 | 1.00 | 0.00 |
| ATOM | 1656 | H   | PHE | 106 | -10.553 | -2.997 | -7.469 | 1.00 | 0.00 |
| ATOM | 1657 | CA  | PHE | 106 | -12.159 | -1.761 | -8.057 | 1.00 | 0.00 |
| ATOM | 1658 | HA  | PHE | 106 | -13.195 | -1.984 | -8.313 | 1.00 | 0.00 |
| ATOM | 1659 | CB  | PHE | 106 | -12.117 | -1.202 | -6.639 | 1.00 | 0.00 |
| ATOM | 1660 | HB2 | PHE | 106 | -13.049 | -0.699 | -6.382 | 1.00 | 0.00 |
| ATOM | 1661 | HB3 | PHE | 106 | -11.949 | -2.029 | -5.949 | 1.00 | 0.00 |
| ATOM | 1662 | CG  | PHE | 106 | -11.002 | -0.201 | -6.397 | 1.00 | 0.00 |
| ATOM | 1663 | CD1 | PHE | 106 | -9.678  | -0.634 | -6.234 | 1.00 | 0.00 |
| ATOM | 1664 | HD1 | PHE | 106 | -9.456  | -1.701 | -6.279 | 1.00 | 0.00 |
| ATOM | 1665 | CE1 | PHE | 106 | -8.649  | 0.285  | -6.016 | 1.00 | 0.00 |
| ATOM | 1666 | HE1 | PHE | 106 | -7.617  | -0.053 | -5.917 | 1.00 | 0.00 |
| ATOM | 1667 | CZ  | PHE | 106 | -8.950  | 1.643  | -5.926 | 1.00 | 0.00 |
| ATOM | 1668 | HZ  | PHE | 106 | -8.163  | 2.358  | -5.688 | 1.00 | 0.00 |
| ATOM | 1669 | CE2 | PHE | 106 | -10.259 | 2.089  | -6.140 | 1.00 | 0.00 |
| ATOM | 1670 | HE2 | PHE | 106 | -10.478 | 3.156  | -6.123 | 1.00 | 0.00 |
| ATOM | 1671 | CD2 | PHE | 106 | -11.283 | 1.171  | -6.375 | 1.00 | 0.00 |
| ATOM | 1672 | HD2 | PHE | 106 | -12.302 | 1.521  | -6.542 | 1.00 | 0.00 |
| ATOM | 1673 | C   | PHE | 106 | -11.623 | -0.728 | -9.001 | 1.00 | 0.00 |
| ATOM | 1674 | O   | PHE | 106 | -10.426 | -0.761 | -9.277 | 1.00 | 0.00 |
| ATOM | 1675 | N   | ILE | 107 | -12.484 | 0.197  | -9.428 | 1.00 | 0.00 |

|      |      |      |     |     |         |        |         |      |      |
|------|------|------|-----|-----|---------|--------|---------|------|------|
| ATOM | 1676 | H    | ILE | 107 | -13.444 | 0.146  | -9.119  | 1.00 | 0.00 |
| ATOM | 1677 | CA   | ILE | 107 | -12.120 | 1.236  | -10.374 | 1.00 | 0.00 |
| ATOM | 1678 | HA   | ILE | 107 | -11.512 | 2.014  | -9.913  | 1.00 | 0.00 |
| ATOM | 1679 | CB   | ILE | 107 | -11.375 | 0.659  | -11.598 | 1.00 | 0.00 |
| ATOM | 1680 | HB   | ILE | 107 | -11.689 | 1.200  | -12.491 | 1.00 | 0.00 |
| ATOM | 1681 | CG2  | ILE | 107 | -9.855  | 0.801  | -11.421 | 1.00 | 0.00 |
| ATOM | 1682 | HG21 | ILE | 107 | -9.541  | 0.259  | -10.529 | 1.00 | 0.00 |
| ATOM | 1683 | HG22 | ILE | 107 | -9.347  | 0.389  | -12.293 | 1.00 | 0.00 |
| ATOM | 1684 | HG23 | ILE | 107 | -9.598  | 1.855  | -11.316 | 1.00 | 0.00 |
| ATOM | 1685 | CG1  | ILE | 107 | -11.775 | -0.808 | -11.873 | 1.00 | 0.00 |
| ATOM | 1686 | HG12 | ILE | 107 | -11.064 | -1.462 | -11.367 | 1.00 | 0.00 |
| ATOM | 1687 | HG13 | ILE | 107 | -12.773 | -0.976 | -11.469 | 1.00 | 0.00 |
| ATOM | 1688 | CD1  | ILE | 107 | -11.773 | -1.112 | -13.351 | 1.00 | 0.00 |
| ATOM | 1689 | HD11 | ILE | 107 | -10.775 | -0.945 | -13.756 | 1.00 | 0.00 |
| ATOM | 1690 | HD12 | ILE | 107 | -12.059 | -2.152 | -13.509 | 1.00 | 0.00 |
| ATOM | 1691 | HD13 | ILE | 107 | -12.484 | -0.460 | -13.858 | 1.00 | 0.00 |
| ATOM | 1692 | C    | ILE | 107 | -13.352 | 1.997  | -10.812 | 1.00 | 0.00 |
| ATOM | 1693 | O    | ILE | 107 | -13.269 | 3.210  | -10.947 | 1.00 | 0.00 |
| ATOM | 1694 | N    | ALA | 108 | -14.467 | 1.288  | -11.024 | 1.00 | 0.00 |
| ATOM | 1695 | H    | ALA | 108 | -14.421 | 0.280  | -10.973 | 1.00 | 0.00 |
| ATOM | 1696 | CA   | ALA | 108 | -15.722 | 1.898  | -11.399 | 1.00 | 0.00 |
| ATOM | 1697 | HA   | ALA | 108 | -15.561 | 2.617  | -12.202 | 1.00 | 0.00 |

|      |      |      |     |     |         |       |         |      |      |
|------|------|------|-----|-----|---------|-------|---------|------|------|
| ATOM | 1698 | CB   | ALA | 108 | -16.677 | 0.815 | -11.898 | 1.00 | 0.00 |
| ATOM | 1699 | HB1  | ALA | 108 | -16.856 | 0.092 | -11.102 | 1.00 | 0.00 |
| ATOM | 1700 | HB2  | ALA | 108 | -17.622 | 1.271 | -12.193 | 1.00 | 0.00 |
| ATOM | 1701 | HB3  | ALA | 108 | -16.236 | 0.308 | -12.756 | 1.00 | 0.00 |
| ATOM | 1702 | C    | ALA | 108 | -16.305 | 2.680 | -10.223 | 1.00 | 0.00 |
| ATOM | 1703 | O    | ALA | 108 | -17.344 | 2.321 | -9.682  | 1.00 | 0.00 |
| ATOM | 1704 | N    | ILE | 109 | -15.616 | 3.734 | -9.815  | 1.00 | 0.00 |
| ATOM | 1705 | H    | ILE | 109 | -14.730 | 3.902 | -10.269 | 1.00 | 0.00 |
| ATOM | 1706 | CA   | ILE | 109 | -15.978 | 4.565 | -8.690  | 1.00 | 0.00 |
| ATOM | 1707 | HA   | ILE | 109 | -17.025 | 4.444 | -8.410  | 1.00 | 0.00 |
| ATOM | 1708 | CB   | ILE | 109 | -15.085 | 4.281 | -7.470  | 1.00 | 0.00 |
| ATOM | 1709 | HB   | ILE | 109 | -14.951 | 5.204 | -6.907  | 1.00 | 0.00 |
| ATOM | 1710 | CG2  | ILE | 109 | -15.729 | 3.219 | -6.565  | 1.00 | 0.00 |
| ATOM | 1711 | HG21 | ILE | 109 | -15.863 | 2.295 | -7.127  | 1.00 | 0.00 |
| ATOM | 1712 | HG22 | ILE | 109 | -15.083 | 3.031 | -5.708  | 1.00 | 0.00 |
| ATOM | 1713 | HG23 | ILE | 109 | -16.698 | 3.576 | -6.218  | 1.00 | 0.00 |
| ATOM | 1714 | CG1  | ILE | 109 | -13.660 | 3.871 | -7.869  | 1.00 | 0.00 |
| ATOM | 1715 | HG12 | ILE | 109 | -13.127 | 3.537 | -6.979  | 1.00 | 0.00 |
| ATOM | 1716 | HG13 | ILE | 109 | -13.717 | 3.052 | -8.586  | 1.00 | 0.00 |
| ATOM | 1717 | CD1  | ILE | 109 | -12.916 | 5.043 | -8.496  | 1.00 | 0.00 |
| ATOM | 1718 | HD11 | ILE | 109 | -12.858 | 5.862 | -7.780  | 1.00 | 0.00 |
| ATOM | 1719 | HD12 | ILE | 109 | -11.909 | 4.729 | -8.771  | 1.00 | 0.00 |

|      |      |      |     |     |         |         |        |      |      |
|------|------|------|-----|-----|---------|---------|--------|------|------|
| ATOM | 1720 | HD13 | ILE | 109 | -13.448 | 5.377   | -9.387 | 1.00 | 0.00 |
| ATOM | 1721 | C    | ILE | 109 | -15.982 | 6.040   | -9.121 | 1.00 | 0.00 |
| ATOM | 1722 | O    | ILE | 109 | -17.009 | 6.700   | -8.935 | 1.00 | 0.00 |
| ATOM | 1723 | OXT  | ILE | 109 | -14.969 | 6.535   | -9.649 | 1.00 | 0.00 |
| TER  |      |      |     |     |         |         |        |      |      |
| ATOM | 1724 | S1   | LIG | 110 | 20.108  | -12.667 | -5.224 | 1.00 | 0.00 |
| ATOM | 1725 | S2   | LIG | 110 | 17.422  | -17.393 | 0.322  | 1.00 | 0.00 |
| ATOM | 1726 | O1   | LIG | 110 | 14.533  | -13.304 | -1.192 | 1.00 | 0.00 |
| ATOM | 1727 | H5   | LIG | 110 | 13.994  | -13.791 | -0.534 | 1.00 | 0.00 |
| ATOM | 1728 | O2   | LIG | 110 | 20.750  | -11.247 | -4.842 | 1.00 | 0.00 |
| ATOM | 1729 | H6   | LIG | 110 | 19.986  | -10.606 | -4.959 | 1.00 | 0.00 |
| ATOM | 1730 | O3   | LIG | 110 | 16.250  | -18.435 | -0.028 | 1.00 | 0.00 |
| ATOM | 1731 | H7   | LIG | 110 | 15.415  | -17.967 | 0.264  | 1.00 | 0.00 |
| ATOM | 1732 | O4   | LIG | 110 | 21.120  | -13.669 | -4.958 | 1.00 | 0.00 |
| ATOM | 1733 | O5   | LIG | 110 | 19.458  | -12.586 | -6.524 | 1.00 | 0.00 |
| ATOM | 1734 | O6   | LIG | 110 | 18.656  | -17.964 | -0.179 | 1.00 | 0.00 |
| ATOM | 1735 | O7   | LIG | 110 | 17.298  | -16.961 | 1.706  | 1.00 | 0.00 |
| ATOM | 1736 | O8   | LIG | 110 | 15.821  | -5.430  | -8.466 | 1.00 | 0.00 |
| ATOM | 1737 | O9   | LIG | 110 | 17.887  | -4.777  | -8.339 | 1.00 | 0.00 |
| ATOM | 1738 | N1   | LIG | 110 | 15.547  | -11.505 | -2.860 | 1.00 | 0.00 |
| ATOM | 1739 | H3   | LIG | 110 | 14.752  | -11.755 | -2.294 | 1.00 | 0.00 |
| ATOM | 1740 | H4   | LIG | 110 | 15.539  | -10.682 | -3.442 | 1.00 | 0.00 |

|      |      |     |     |     |        |         |        |      |      |
|------|------|-----|-----|-----|--------|---------|--------|------|------|
| ATOM | 1741 | N2  | LIG | 110 | 17.403 | -10.803 | -4.543 | 1.00 | 0.00 |
| ATOM | 1742 | N3  | LIG | 110 | 14.657 | -15.445 | 0.177  | 1.00 | 0.00 |
| ATOM | 1743 | N4  | LIG | 110 | 18.332 | -10.165 | -5.117 | 1.00 | 0.00 |
| ATOM | 1744 | N5  | LIG | 110 | 14.433 | -16.583 | 0.673  | 1.00 | 0.00 |
| ATOM | 1745 | N6  | LIG | 110 | 16.984 | -5.568  | -8.105 | 1.00 | 0.00 |
| ATOM | 1746 | C1  | LIG | 110 | 16.684 | -13.559 | -2.212 | 1.00 | 0.00 |
| ATOM | 1747 | C2  | LIG | 110 | 17.849 | -14.367 | -2.339 | 1.00 | 0.00 |
| ATOM | 1748 | C3  | LIG | 110 | 16.594 | -12.339 | -2.982 | 1.00 | 0.00 |
| ATOM | 1749 | C4  | LIG | 110 | 18.792 | -12.851 | -3.979 | 1.00 | 0.00 |
| ATOM | 1750 | C5  | LIG | 110 | 18.881 | -13.994 | -3.236 | 1.00 | 0.00 |
| ATOM | 1751 | H1  | LIG | 110 | 19.743 | -14.639 | -3.352 | 1.00 | 0.00 |
| ATOM | 1752 | C6  | LIG | 110 | 15.671 | -14.016 | -1.330 | 1.00 | 0.00 |
| ATOM | 1753 | C7  | LIG | 110 | 16.997 | -15.969 | -0.721 | 1.00 | 0.00 |
| ATOM | 1754 | C8  | LIG | 110 | 17.985 | -15.550 | -1.572 | 1.00 | 0.00 |
| ATOM | 1755 | H2  | LIG | 110 | 18.894 | -16.131 | -1.651 | 1.00 | 0.00 |
| ATOM | 1756 | C9  | LIG | 110 | 17.661 | -11.978 | -3.871 | 1.00 | 0.00 |
| ATOM | 1757 | C10 | LIG | 110 | 15.790 | -15.218 | -0.593 | 1.00 | 0.00 |
| ATOM | 1758 | C11 | LIG | 110 | 17.933 | -9.036  | -5.858 | 1.00 | 0.00 |
| ATOM | 1759 | C12 | LIG | 110 | 13.291 | -16.706 | 1.488  | 1.00 | 0.00 |
| ATOM | 1760 | C13 | LIG | 110 | 16.618 | -8.830  | -6.308 | 1.00 | 0.00 |
| ATOM | 1761 | H8  | LIG | 110 | 15.861 | -9.574  | -6.101 | 1.00 | 0.00 |
| ATOM | 1762 | C14 | LIG | 110 | 18.937 | -8.112  | -6.179 | 1.00 | 0.00 |

|      |      |     |     |     |        |         |        |      |      |
|------|------|-----|-----|-----|--------|---------|--------|------|------|
| ATOM | 1763 | H9  | LIG | 110 | 19.953 | -8.291  | -5.850 | 1.00 | 0.00 |
| ATOM | 1764 | C15 | LIG | 110 | 16.308 | -7.697  | -7.041 | 1.00 | 0.00 |
| ATOM | 1765 | H10 | LIG | 110 | 15.307 | -7.517  | -7.408 | 1.00 | 0.00 |
| ATOM | 1766 | C16 | LIG | 110 | 18.631 | -6.971  | -6.907 | 1.00 | 0.00 |
| ATOM | 1767 | H11 | LIG | 110 | 19.386 | -6.240  | -7.157 | 1.00 | 0.00 |
| ATOM | 1768 | C17 | LIG | 110 | 17.317 | -6.778  | -7.324 | 1.00 | 0.00 |
| ATOM | 1769 | C18 | LIG | 110 | 12.587 | -15.616 | 2.026  | 1.00 | 0.00 |
| ATOM | 1770 | H12 | LIG | 110 | 12.936 | -14.608 | 1.843  | 1.00 | 0.00 |
| ATOM | 1771 | C19 | LIG | 110 | 12.884 | -18.016 | 1.779  | 1.00 | 0.00 |
| ATOM | 1772 | H13 | LIG | 110 | 13.449 | -18.850 | 1.380  | 1.00 | 0.00 |
| ATOM | 1773 | C20 | LIG | 110 | 11.473 | -15.845 | 2.818  | 1.00 | 0.00 |
| ATOM | 1774 | H14 | LIG | 110 | 10.933 | -15.007 | 3.243  | 1.00 | 0.00 |
| ATOM | 1775 | C21 | LIG | 110 | 11.759 | -18.235 | 2.565  | 1.00 | 0.00 |
| ATOM | 1776 | H15 | LIG | 110 | 11.441 | -19.248 | 2.779  | 1.00 | 0.00 |
| ATOM | 1777 | C22 | LIG | 110 | 11.050 | -17.152 | 3.084  | 1.00 | 0.00 |
| ATOM | 1778 | H16 | LIG | 110 | 10.180 | -17.322 | 3.707  | 1.00 | 0.00 |
| TER  |      |     |     |     |        |         |        |      |      |
| ATOM | 1779 | S1  | LIG | 111 | 10.851 | -7.304  | 22.174 | 1.00 | 0.00 |
| ATOM | 1780 | S2  | LIG | 111 | 10.239 | -7.724  | 14.443 | 1.00 | 0.00 |
| ATOM | 1781 | O1  | LIG | 111 | 13.704 | -10.763 | 16.916 | 1.00 | 0.00 |
| ATOM | 1782 | H5  | LIG | 111 | 13.751 | -11.011 | 15.968 | 1.00 | 0.00 |
| ATOM | 1783 | O2  | LIG | 111 | 12.056 | -6.490  | 22.851 | 1.00 | 0.00 |

|      |      |    |     |     |        |         |        |      |      |
|------|------|----|-----|-----|--------|---------|--------|------|------|
| ATOM | 1784 | H6 | LIG | 111 | 12.738 | -7.201  | 23.046 | 1.00 | 0.00 |
| ATOM | 1785 | O3 | LIG | 111 | 9.505  | -8.989  | 13.777 | 1.00 | 0.00 |
| ATOM | 1786 | H7 | LIG | 111 | 10.256 | -9.605  | 13.537 | 1.00 | 0.00 |
| ATOM | 1787 | O4 | LIG | 111 | 9.872  | -6.326  | 21.746 | 1.00 | 0.00 |
| ATOM | 1788 | O5 | LIG | 111 | 10.469 | -8.425  | 23.021 | 1.00 | 0.00 |
| ATOM | 1789 | O6 | LIG | 111 | 9.198  | -6.835  | 14.916 | 1.00 | 0.00 |
| ATOM | 1790 | O7 | LIG | 111 | 11.294 | -7.247  | 13.562 | 1.00 | 0.00 |
| ATOM | 1791 | O8 | LIG | 111 | 16.498 | -12.163 | 27.250 | 1.00 | 0.00 |
| ATOM | 1792 | O9 | LIG | 111 | 16.564 | -10.195 | 28.165 | 1.00 | 0.00 |
| ATOM | 1793 | N1 | LIG | 111 | 14.150 | -10.430 | 19.511 | 1.00 | 0.00 |
| ATOM | 1794 | H3 | LIG | 111 | 14.420 | -10.935 | 18.682 | 1.00 | 0.00 |
| ATOM | 1795 | H4 | LIG | 111 | 14.565 | -10.634 | 20.407 | 1.00 | 0.00 |
| ATOM | 1796 | N2 | LIG | 111 | 13.449 | -9.393  | 21.792 | 1.00 | 0.00 |
| ATOM | 1797 | N3 | LIG | 111 | 12.528 | -10.201 | 14.730 | 1.00 | 0.00 |
| ATOM | 1798 | N4 | LIG | 111 | 13.467 | -8.748  | 22.881 | 1.00 | 0.00 |
| ATOM | 1799 | N5 | LIG | 111 | 11.870 | -10.261 | 13.656 | 1.00 | 0.00 |
| ATOM | 1800 | N6 | LIG | 111 | 16.250 | -10.963 | 27.266 | 1.00 | 0.00 |
| ATOM | 1801 | C1 | LIG | 111 | 12.439 | -9.236  | 18.257 | 1.00 | 0.00 |
| ATOM | 1802 | C2 | LIG | 111 | 11.395 | -8.268  | 18.288 | 1.00 | 0.00 |
| ATOM | 1803 | C3 | LIG | 111 | 13.118 | -9.570  | 19.488 | 1.00 | 0.00 |
| ATOM | 1804 | C4 | LIG | 111 | 11.637 | -8.003  | 20.687 | 1.00 | 0.00 |
| ATOM | 1805 | C5 | LIG | 111 | 11.009 | -7.677  | 19.517 | 1.00 | 0.00 |



|      |      |     |     |     |        |         |        |      |      |
|------|------|-----|-----|-----|--------|---------|--------|------|------|
| ATOM | 1806 | H1  | LIG | 111 | 10.187 | -6.973  | 19.533 | 1.00 | 0.00 |
| ATOM | 1807 | C6  | LIG | 111 | 12.742 | -9.821  | 17.000 | 1.00 | 0.00 |
| ATOM | 1808 | C7  | LIG | 111 | 11.047 | -8.464  | 15.891 | 1.00 | 0.00 |
| ATOM | 1809 | C8  | LIG | 111 | 10.733 | -7.892  | 17.094 | 1.00 | 0.00 |
| ATOM | 1810 | H2  | LIG | 111 | 9.970  | -7.126  | 17.131 | 1.00 | 0.00 |
| ATOM | 1811 | C9  | LIG | 111 | 12.717 | -8.944  | 20.715 | 1.00 | 0.00 |
| ATOM | 1812 | C10 | LIG | 111 | 12.054 | -9.473  | 15.814 | 1.00 | 0.00 |
| ATOM | 1813 | C11 | LIG | 111 | 14.165 | -9.357  | 23.941 | 1.00 | 0.00 |
| ATOM | 1814 | C12 | LIG | 111 | 12.455 | -10.973 | 12.592 | 1.00 | 0.00 |
| ATOM | 1815 | C13 | LIG | 111 | 14.467 | -10.729 | 23.984 | 1.00 | 0.00 |
| ATOM | 1816 | H8  | LIG | 111 | 14.140 | -11.372 | 23.178 | 1.00 | 0.00 |
| ATOM | 1817 | C14 | LIG | 111 | 14.523 | -8.526  | 25.013 | 1.00 | 0.00 |
| ATOM | 1818 | H9  | LIG | 111 | 14.263 | -7.476  | 24.983 | 1.00 | 0.00 |
| ATOM | 1819 | C15 | LIG | 111 | 15.150 | -11.253 | 25.069 | 1.00 | 0.00 |
| ATOM | 1820 | H10 | LIG | 111 | 15.388 | -12.305 | 25.132 | 1.00 | 0.00 |
| ATOM | 1821 | C16 | LIG | 111 | 15.213 | -9.045  | 26.099 | 1.00 | 0.00 |
| ATOM | 1822 | H11 | LIG | 111 | 15.508 | -8.421  | 26.931 | 1.00 | 0.00 |
| ATOM | 1823 | C17 | LIG | 111 | 15.521 | -10.402 | 26.109 | 1.00 | 0.00 |
| ATOM | 1824 | C18 | LIG | 111 | 13.811 | -11.337 | 12.540 | 1.00 | 0.00 |
| ATOM | 1825 | H12 | LIG | 111 | 14.477 | -11.043 | 13.340 | 1.00 | 0.00 |
| ATOM | 1826 | C19 | LIG | 111 | 11.602 | -11.293 | 11.526 | 1.00 | 0.00 |
| ATOM | 1827 | H13 | LIG | 111 | 10.564 | -10.984 | 11.564 | 1.00 | 0.00 |

|      |      |     |     |     |         |         |         |      |      |
|------|------|-----|-----|-----|---------|---------|---------|------|------|
| ATOM | 1828 | C20 | LIG | 111 | 14.289  | -12.040 | 11.445  | 1.00 | 0.00 |
| ATOM | 1829 | H14 | LIG | 111 | 15.337  | -12.314 | 11.397  | 1.00 | 0.00 |
| ATOM | 1830 | C21 | LIG | 111 | 12.088  | -12.007 | 10.437  | 1.00 | 0.00 |
| ATOM | 1831 | H15 | LIG | 111 | 11.425  | -12.261 | 9.620   | 1.00 | 0.00 |
| ATOM | 1832 | C22 | LIG | 111 | 13.430  | -12.384 | 10.395  | 1.00 | 0.00 |
| ATOM | 1833 | H16 | LIG | 111 | 13.814  | -12.929 | 9.541   | 1.00 | 0.00 |
| TER  |      |     |     |     |         |         |         |      |      |
| ATOM | 1834 | S1  | LIG | 112 | -22.156 | 16.776  | -21.134 | 1.00 | 0.00 |
| ATOM | 1835 | S2  | LIG | 112 | -24.732 | 17.758  | -13.874 | 1.00 | 0.00 |
| ATOM | 1836 | O1  | LIG | 112 | -25.685 | 21.444  | -17.461 | 1.00 | 0.00 |
| ATOM | 1837 | H5  | LIG | 112 | -26.137 | 21.737  | -16.641 | 1.00 | 0.00 |
| ATOM | 1838 | O2  | LIG | 112 | -20.839 | 17.539  | -21.640 | 1.00 | 0.00 |
| ATOM | 1839 | H6  | LIG | 112 | -21.204 | 18.352  | -22.104 | 1.00 | 0.00 |
| ATOM | 1840 | O3  | LIG | 112 | -26.296 | 17.567  | -13.558 | 1.00 | 0.00 |
| ATOM | 1841 | H7  | LIG | 112 | -26.664 | 18.497  | -13.588 | 1.00 | 0.00 |
| ATOM | 1842 | O4  | LIG | 112 | -21.709 | 15.649  | -20.341 | 1.00 | 0.00 |
| ATOM | 1843 | O5  | LIG | 112 | -23.082 | 16.591  | -22.243 | 1.00 | 0.00 |
| ATOM | 1844 | O6  | LIG | 112 | -24.155 | 16.432  | -13.957 | 1.00 | 0.00 |
| ATOM | 1845 | O7  | LIG | 112 | -24.173 | 18.770  | -12.991 | 1.00 | 0.00 |
| ATOM | 1846 | O8  | LIG | 112 | -23.353 | 22.562  | -27.942 | 1.00 | 0.00 |
| ATOM | 1847 | O9  | LIG | 112 | -21.312 | 21.874  | -28.218 | 1.00 | 0.00 |
| ATOM | 1848 | N1  | LIG | 112 | -24.565 | 21.284  | -19.861 | 1.00 | 0.00 |

|      |      |     |     |     |         |        |         |      |      |
|------|------|-----|-----|-----|---------|--------|---------|------|------|
| ATOM | 1849 | H3  | LIG | 112 | -25.146 | 21.839 | -19.253 | 1.00 | 0.00 |
| ATOM | 1850 | H4  | LIG | 112 | -24.379 | 21.567 | -20.811 | 1.00 | 0.00 |
| ATOM | 1851 | N2  | LIG | 112 | -23.274 | 19.898 | -21.645 | 1.00 | 0.00 |
| ATOM | 1852 | N3  | LIG | 112 | -26.133 | 20.582 | -15.109 | 1.00 | 0.00 |
| ATOM | 1853 | N4  | LIG | 112 | -22.403 | 19.522 | -22.483 | 1.00 | 0.00 |
| ATOM | 1854 | N5  | LIG | 112 | -26.685 | 20.181 | -14.048 | 1.00 | 0.00 |
| ATOM | 1855 | N6  | LIG | 112 | -22.345 | 21.972 | -27.570 | 1.00 | 0.00 |
| ATOM | 1856 | C1  | LIG | 112 | -24.381 | 19.560 | -18.152 | 1.00 | 0.00 |
| ATOM | 1857 | C2  | LIG | 112 | -23.847 | 18.290 | -17.792 | 1.00 | 0.00 |
| ATOM | 1858 | C3  | LIG | 112 | -24.139 | 20.067 | -19.483 | 1.00 | 0.00 |
| ATOM | 1859 | C4  | LIG | 112 | -22.908 | 17.993 | -20.008 | 1.00 | 0.00 |
| ATOM | 1860 | C5  | LIG | 112 | -23.125 | 17.526 | -18.742 | 1.00 | 0.00 |
| ATOM | 1861 | H1  | LIG | 112 | -22.759 | 16.544 | -18.468 | 1.00 | 0.00 |
| ATOM | 1862 | C6  | LIG | 112 | -25.132 | 20.249 | -17.166 | 1.00 | 0.00 |
| ATOM | 1863 | C7  | LIG | 112 | -24.759 | 18.465 | -15.546 | 1.00 | 0.00 |
| ATOM | 1864 | C8  | LIG | 112 | -24.036 | 17.780 | -16.485 | 1.00 | 0.00 |
| ATOM | 1865 | H2  | LIG | 112 | -23.589 | 16.831 | -16.217 | 1.00 | 0.00 |
| ATOM | 1866 | C9  | LIG | 112 | -23.390 | 19.279 | -20.420 | 1.00 | 0.00 |
| ATOM | 1867 | C10 | LIG | 112 | -25.353 | 19.722 | -15.871 | 1.00 | 0.00 |
| ATOM | 1868 | C11 | LIG | 112 | -22.447 | 20.160 | -23.738 | 1.00 | 0.00 |
| ATOM | 1869 | C12 | LIG | 112 | -27.408 | 21.137 | -13.308 | 1.00 | 0.00 |
| ATOM | 1870 | C13 | LIG | 112 | -23.578 | 20.840 | -24.223 | 1.00 | 0.00 |

|      |      |     |     |     |         |         |         |      |      |
|------|------|-----|-----|-----|---------|---------|---------|------|------|
| ATOM | 1871 | H8  | LIG | 112 | -24.478 | 20.873  | -23.624 | 1.00 | 0.00 |
| ATOM | 1872 | C14 | LIG | 112 | -21.299 | 20.052  | -24.535 | 1.00 | 0.00 |
| ATOM | 1873 | H9  | LIG | 112 | -20.442 | 19.504  | -24.164 | 1.00 | 0.00 |
| ATOM | 1874 | C15 | LIG | 112 | -23.544 | 21.433  | -25.474 | 1.00 | 0.00 |
| ATOM | 1875 | H10 | LIG | 112 | -24.401 | 21.955  | -25.875 | 1.00 | 0.00 |
| ATOM | 1876 | C16 | LIG | 112 | -21.257 | 20.650  | -25.786 | 1.00 | 0.00 |
| ATOM | 1877 | H11 | LIG | 112 | -20.378 | 20.589  | -26.413 | 1.00 | 0.00 |
| ATOM | 1878 | C17 | LIG | 112 | -22.380 | 21.338  | -26.236 | 1.00 | 0.00 |
| ATOM | 1879 | C18 | LIG | 112 | -27.295 | 22.525  | -13.494 | 1.00 | 0.00 |
| ATOM | 1880 | H12 | LIG | 112 | -26.599 | 22.914  | -14.225 | 1.00 | 0.00 |
| ATOM | 1881 | C19 | LIG | 112 | -28.259 | 20.629  | -12.316 | 1.00 | 0.00 |
| ATOM | 1882 | H13 | LIG | 112 | -28.318 | 19.558  | -12.164 | 1.00 | 0.00 |
| ATOM | 1883 | C20 | LIG | 112 | -28.053 | 23.383  | -12.713 | 1.00 | 0.00 |
| ATOM | 1884 | H14 | LIG | 112 | -27.962 | 24.455  | -12.847 | 1.00 | 0.00 |
| ATOM | 1885 | C21 | LIG | 112 | -29.022 | 21.498  | -11.545 | 1.00 | 0.00 |
| ATOM | 1886 | H15 | LIG | 112 | -29.686 | 21.102  | -10.786 | 1.00 | 0.00 |
| ATOM | 1887 | C22 | LIG | 112 | -28.923 | 22.874  | -11.743 | 1.00 | 0.00 |
| ATOM | 1888 | H16 | LIG | 112 | -29.509 | 23.553  | -11.134 | 1.00 | 0.00 |
| TER  |      |     |     |     |         |         |         |      |      |
| ATOM | 1889 | S1  | LIG | 113 | -4.325  | -24.043 | -3.550  | 1.00 | 0.00 |
| ATOM | 1890 | S2  | LIG | 113 | -2.239  | -21.438 | -10.562 | 1.00 | 0.00 |
| ATOM | 1891 | O1  | LIG | 113 | 0.648   | -20.176 | -6.387  | 1.00 | 0.00 |

|      |      |    |     |     |        |         |         |      |      |
|------|------|----|-----|-----|--------|---------|---------|------|------|
| ATOM | 1892 | H5 | LIG | 113 | 1.111  | -19.797 | -7.164  | 1.00 | 0.00 |
| ATOM | 1893 | O2 | LIG | 113 | -5.078 | -23.075 | -2.513  | 1.00 | 0.00 |
| ATOM | 1894 | H6 | LIG | 113 | -4.334 | -22.732 | -1.932  | 1.00 | 0.00 |
| ATOM | 1895 | O3 | LIG | 113 | -0.984 | -22.106 | -11.311 | 1.00 | 0.00 |
| ATOM | 1896 | H7 | LIG | 113 | -0.220 | -21.498 | -11.093 | 1.00 | 0.00 |
| ATOM | 1897 | O4 | LIG | 113 | -5.318 | -24.484 | -4.508  | 1.00 | 0.00 |
| ATOM | 1898 | O5 | LIG | 113 | -3.503 | -25.003 | -2.827  | 1.00 | 0.00 |
| ATOM | 1899 | O6 | LIG | 113 | -3.363 | -22.333 | -10.745 | 1.00 | 0.00 |
| ATOM | 1900 | O7 | LIG | 113 | -2.331 | -20.031 | -10.917 | 1.00 | 0.00 |
| ATOM | 1901 | O8 | LIG | 113 | 0.048  | -22.400 | 4.160   | 1.00 | 0.00 |
| ATOM | 1902 | O9 | LIG | 113 | -2.042 | -22.252 | 4.725   | 1.00 | 0.00 |
| ATOM | 1903 | N1 | LIG | 113 | -0.199 | -20.793 | -3.949  | 1.00 | 0.00 |
| ATOM | 1904 | H3 | LIG | 113 | 0.518  | -20.331 | -4.485  | 1.00 | 0.00 |
| ATOM | 1905 | H4 | LIG | 113 | -0.146 | -20.855 | -2.944  | 1.00 | 0.00 |
| ATOM | 1906 | N2 | LIG | 113 | -1.829 | -22.113 | -2.409  | 1.00 | 0.00 |
| ATOM | 1907 | N3 | LIG | 113 | 0.429  | -20.153 | -8.922  | 1.00 | 0.00 |
| ATOM | 1908 | N4 | LIG | 113 | -2.696 | -22.398 | -1.533  | 1.00 | 0.00 |
| ATOM | 1909 | N5 | LIG | 113 | 0.632  | -20.292 | -10.159 | 1.00 | 0.00 |
| ATOM | 1910 | N6 | LIG | 113 | -1.146 | -22.335 | 3.896   | 1.00 | 0.00 |
| ATOM | 1911 | C1 | LIG | 113 | -1.323 | -21.477 | -5.998  | 1.00 | 0.00 |
| ATOM | 1912 | C2 | LIG | 113 | -2.422 | -22.170 | -6.581  | 1.00 | 0.00 |
| ATOM | 1913 | C3 | LIG | 113 | -1.180 | -21.479 | -4.560  | 1.00 | 0.00 |

|      |      |     |     |     |        |         |         |      |      |
|------|------|-----|-----|-----|--------|---------|---------|------|------|
| ATOM | 1914 | C4  | LIG | 113 | -3.191 | -22.900 | -4.400  | 1.00 | 0.00 |
| ATOM | 1915 | C5  | LIG | 113 | -3.332 | -22.881 | -5.759  | 1.00 | 0.00 |
| ATOM | 1916 | H1  | LIG | 113 | -4.139 | -23.437 | -6.218  | 1.00 | 0.00 |
| ATOM | 1917 | C6  | LIG | 113 | -0.425 | -20.825 | -6.883  | 1.00 | 0.00 |
| ATOM | 1918 | C7  | LIG | 113 | -1.735 | -21.517 | -8.820  | 1.00 | 0.00 |
| ATOM | 1919 | C8  | LIG | 113 | -2.611 | -22.158 | -7.984  | 1.00 | 0.00 |
| ATOM | 1920 | H2  | LIG | 113 | -3.474 | -22.657 | -8.406  | 1.00 | 0.00 |
| ATOM | 1921 | C9  | LIG | 113 | -2.126 | -22.193 | -3.752  | 1.00 | 0.00 |
| ATOM | 1922 | C10 | LIG | 113 | -0.593 | -20.846 | -8.288  | 1.00 | 0.00 |
| ATOM | 1923 | C11 | LIG | 113 | -2.247 | -22.379 | -0.198  | 1.00 | 0.00 |
| ATOM | 1924 | C12 | LIG | 113 | 1.651  | -19.506 | -10.729 | 1.00 | 0.00 |
| ATOM | 1925 | C13 | LIG | 113 | -0.892 | -22.463 | 0.165   | 1.00 | 0.00 |
| ATOM | 1926 | H8  | LIG | 113 | -0.139 | -22.566 | -0.605  | 1.00 | 0.00 |
| ATOM | 1927 | C14 | LIG | 113 | -3.236 | -22.314 | 0.793   | 1.00 | 0.00 |
| ATOM | 1928 | H9  | LIG | 113 | -4.279 | -22.275 | 0.505   | 1.00 | 0.00 |
| ATOM | 1929 | C15 | LIG | 113 | -0.532 | -22.447 | 1.502   | 1.00 | 0.00 |
| ATOM | 1930 | H10 | LIG | 113 | 0.501  | -22.519 | 1.811   | 1.00 | 0.00 |
| ATOM | 1931 | C16 | LIG | 113 | -2.881 | -22.291 | 2.135   | 1.00 | 0.00 |
| ATOM | 1932 | H11 | LIG | 113 | -3.626 | -22.230 | 2.915   | 1.00 | 0.00 |
| ATOM | 1933 | C17 | LIG | 113 | -1.532 | -22.353 | 2.470   | 1.00 | 0.00 |
| ATOM | 1934 | C18 | LIG | 113 | 2.223  | -18.386 | -10.103 | 1.00 | 0.00 |
| ATOM | 1935 | H12 | LIG | 113 | 1.859  | -18.067 | -9.135  | 1.00 | 0.00 |

|      |      |     |     |     |       |         |         |      |      |
|------|------|-----|-----|-----|-------|---------|---------|------|------|
| ATOM | 1936 | C19 | LIG | 113 | 2.072 | -19.883 | -12.012 | 1.00 | 0.00 |
| ATOM | 1937 | H13 | LIG | 113 | 1.606 | -20.733 | -12.496 | 1.00 | 0.00 |
| ATOM | 1938 | C20 | LIG | 113 | 3.224 | -17.678 | -10.750 | 1.00 | 0.00 |
| ATOM | 1939 | H14 | LIG | 113 | 3.660 | -16.807 | -10.275 | 1.00 | 0.00 |
| ATOM | 1940 | C21 | LIG | 113 | 3.084 | -19.173 | -12.648 | 1.00 | 0.00 |
| ATOM | 1941 | H15 | LIG | 113 | 3.413 | -19.473 | -13.635 | 1.00 | 0.00 |
| ATOM | 1942 | C22 | LIG | 113 | 3.663 | -18.072 | -12.019 | 1.00 | 0.00 |
| ATOM | 1943 | H16 | LIG | 113 | 4.443 | -17.510 | -12.519 | 1.00 | 0.00 |

TER

|      |      |    |     |     |        |       |         |      |      |
|------|------|----|-----|-----|--------|-------|---------|------|------|
| ATOM | 1944 | S1 | LIG | 114 | 21.974 | 2.179 | -23.522 | 1.00 | 0.00 |
| ATOM | 1945 | S2 | LIG | 114 | 14.565 | 1.764 | -21.233 | 1.00 | 0.00 |
| ATOM | 1946 | O1 | LIG | 114 | 17.738 | 5.300 | -19.044 | 1.00 | 0.00 |
| ATOM | 1947 | H5 | LIG | 114 | 16.849 | 5.453 | -18.657 | 1.00 | 0.00 |
| ATOM | 1948 | O2 | LIG | 114 | 23.139 | 1.533 | -22.627 | 1.00 | 0.00 |
| ATOM | 1949 | H6 | LIG | 114 | 23.480 | 2.312 | -22.091 | 1.00 | 0.00 |
| ATOM | 1950 | O3 | LIG | 114 | 13.526 | 2.894 | -21.711 | 1.00 | 0.00 |
| ATOM | 1951 | H7 | LIG | 114 | 13.504 | 3.540 | -20.947 | 1.00 | 0.00 |
| ATOM | 1952 | O4 | LIG | 114 | 21.342 | 1.088 | -24.236 | 1.00 | 0.00 |
| ATOM | 1953 | O5 | LIG | 114 | 22.479 | 3.346 | -24.230 | 1.00 | 0.00 |
| ATOM | 1954 | O6 | LIG | 114 | 14.731 | 0.849 | -22.343 | 1.00 | 0.00 |
| ATOM | 1955 | O7 | LIG | 114 | 14.195 | 1.285 | -19.910 | 1.00 | 0.00 |
| ATOM | 1956 | O8 | LIG | 114 | 28.122 | 7.952 | -20.339 | 1.00 | 0.00 |

|      |      |     |     |     |        |       |         |      |      |
|------|------|-----|-----|-----|--------|-------|---------|------|------|
| ATOM | 1957 | O9  | LIG | 114 | 29.233 | 6.098 | -20.548 | 1.00 | 0.00 |
| ATOM | 1958 | N1  | LIG | 114 | 20.336 | 5.267 | -19.582 | 1.00 | 0.00 |
| ATOM | 1959 | H3  | LIG | 114 | 19.607 | 5.705 | -19.042 | 1.00 | 0.00 |
| ATOM | 1960 | H4  | LIG | 114 | 21.290 | 5.592 | -19.537 | 1.00 | 0.00 |
| ATOM | 1961 | N2  | LIG | 114 | 22.313 | 4.415 | -21.043 | 1.00 | 0.00 |
| ATOM | 1962 | N3  | LIG | 114 | 15.360 | 4.429 | -19.303 | 1.00 | 0.00 |
| ATOM | 1963 | N4  | LIG | 114 | 23.403 | 3.887 | -21.408 | 1.00 | 0.00 |
| ATOM | 1964 | N5  | LIG | 114 | 14.122 | 4.328 | -19.516 | 1.00 | 0.00 |
| ATOM | 1965 | N6  | LIG | 114 | 28.194 | 6.744 | -20.533 | 1.00 | 0.00 |
| ATOM | 1966 | C1  | LIG | 114 | 18.701 | 3.822 | -20.662 | 1.00 | 0.00 |
| ATOM | 1967 | C2  | LIG | 114 | 18.468 | 2.784 | -21.608 | 1.00 | 0.00 |
| ATOM | 1968 | C3  | LIG | 114 | 20.044 | 4.331 | -20.501 | 1.00 | 0.00 |
| ATOM | 1969 | C4  | LIG | 114 | 20.802 | 2.782 | -22.265 | 1.00 | 0.00 |
| ATOM | 1970 | C5  | LIG | 114 | 19.534 | 2.292 | -22.402 | 1.00 | 0.00 |
| ATOM | 1971 | H1  | LIG | 114 | 19.335 | 1.530 | -23.145 | 1.00 | 0.00 |
| ATOM | 1972 | C6  | LIG | 114 | 17.580 | 4.299 | -19.934 | 1.00 | 0.00 |
| ATOM | 1973 | C7  | LIG | 114 | 16.104 | 2.708 | -21.047 | 1.00 | 0.00 |
| ATOM | 1974 | C8  | LIG | 114 | 17.171 | 2.238 | -21.765 | 1.00 | 0.00 |
| ATOM | 1975 | H2  | LIG | 114 | 17.021 | 1.422 | -22.460 | 1.00 | 0.00 |
| ATOM | 1976 | C9  | LIG | 114 | 21.107 | 3.803 | -21.306 | 1.00 | 0.00 |
| ATOM | 1977 | C10 | LIG | 114 | 16.277 | 3.779 | -20.119 | 1.00 | 0.00 |
| ATOM | 1978 | C11 | LIG | 114 | 24.562 | 4.653 | -21.176 | 1.00 | 0.00 |



|      |      |     |     |     |         |         |         |      |      |
|------|------|-----|-----|-----|---------|---------|---------|------|------|
| ATOM | 1979 | C12 | LIG | 114 | 13.265  | 4.972   | -18.603 | 1.00 | 0.00 |
| ATOM | 1980 | C13 | LIG | 114 | 24.543  | 6.041   | -20.959 | 1.00 | 0.00 |
| ATOM | 1981 | H8  | LIG | 114 | 23.601  | 6.572   | -20.986 | 1.00 | 0.00 |
| ATOM | 1982 | C14 | LIG | 114 | 25.783  | 3.965   | -21.213 | 1.00 | 0.00 |
| ATOM | 1983 | H9  | LIG | 114 | 25.790  | 2.900   | -21.405 | 1.00 | 0.00 |
| ATOM | 1984 | C15 | LIG | 114 | 25.729  | 6.724   | -20.748 | 1.00 | 0.00 |
| ATOM | 1985 | H10 | LIG | 114 | 25.745  | 7.793   | -20.588 | 1.00 | 0.00 |
| ATOM | 1986 | C16 | LIG | 114 | 26.974  | 4.643   | -20.995 | 1.00 | 0.00 |
| ATOM | 1987 | H11 | LIG | 114 | 27.926  | 4.132   | -21.007 | 1.00 | 0.00 |
| ATOM | 1988 | C17 | LIG | 114 | 26.929  | 6.014   | -20.760 | 1.00 | 0.00 |
| ATOM | 1989 | C18 | LIG | 114 | 13.667  | 5.435   | -17.339 | 1.00 | 0.00 |
| ATOM | 1990 | H12 | LIG | 114 | 14.685  | 5.276   | -17.008 | 1.00 | 0.00 |
| ATOM | 1991 | C19 | LIG | 114 | 11.931  | 5.115   | -19.010 | 1.00 | 0.00 |
| ATOM | 1992 | H13 | LIG | 114 | 11.626  | 4.732   | -19.976 | 1.00 | 0.00 |
| ATOM | 1993 | C20 | LIG | 114 | 12.744  | 6.058   | -16.513 | 1.00 | 0.00 |
| ATOM | 1994 | H14 | LIG | 114 | 13.049  | 6.407   | -15.533 | 1.00 | 0.00 |
| ATOM | 1995 | C21 | LIG | 114 | 11.016  | 5.751   | -18.179 | 1.00 | 0.00 |
| ATOM | 1996 | H15 | LIG | 114 | 9.988   | 5.868   | -18.501 | 1.00 | 0.00 |
| ATOM | 1997 | C22 | LIG | 114 | 11.420  | 6.226   | -16.932 | 1.00 | 0.00 |
| ATOM | 1998 | H16 | LIG | 114 | 10.704  | 6.710   | -16.278 | 1.00 | 0.00 |
| TER  |      |     |     |     |         |         |         |      |      |
| ATOM | 1999 | S1  | LIG | 115 | -11.665 | -23.382 | 16.837  | 1.00 | 0.00 |

|      |      |    |     |     |         |         |        |      |      |
|------|------|----|-----|-----|---------|---------|--------|------|------|
| ATOM | 2000 | S2 | LIG | 115 | -11.302 | -24.023 | 9.106  | 1.00 | 0.00 |
| ATOM | 2001 | O1 | LIG | 115 | -12.972 | -19.549 | 11.239 | 1.00 | 0.00 |
| ATOM | 2002 | H5 | LIG | 115 | -12.952 | -19.399 | 10.270 | 1.00 | 0.00 |
| ATOM | 2003 | O2 | LIG | 115 | -13.071 | -23.515 | 17.599 | 1.00 | 0.00 |
| ATOM | 2004 | H6 | LIG | 115 | -13.364 | -22.562 | 17.717 | 1.00 | 0.00 |
| ATOM | 2005 | O3 | LIG | 115 | -10.123 | -23.279 | 8.307  | 1.00 | 0.00 |
| ATOM | 2006 | H7 | LIG | 115 | -10.540 | -22.422 | 8.003  | 1.00 | 0.00 |
| ATOM | 2007 | O4 | LIG | 115 | -11.232 | -24.726 | 16.517 | 1.00 | 0.00 |
| ATOM | 2008 | O5 | LIG | 115 | -10.792 | -22.466 | 17.558 | 1.00 | 0.00 |
| ATOM | 2009 | O6 | LIG | 115 | -10.731 | -25.228 | 9.672  | 1.00 | 0.00 |
| ATOM | 2010 | O7 | LIG | 115 | -12.500 | -24.071 | 8.283  | 1.00 | 0.00 |
| ATOM | 2011 | O8 | LIG | 115 | -14.379 | -16.073 | 21.363 | 1.00 | 0.00 |
| ATOM | 2012 | O9 | LIG | 115 | -15.252 | -17.714 | 22.485 | 1.00 | 0.00 |
| ATOM | 2013 | N1 | LIG | 115 | -13.395 | -19.399 | 13.854 | 1.00 | 0.00 |
| ATOM | 2014 | H3 | LIG | 115 | -13.456 | -18.910 | 12.976 | 1.00 | 0.00 |
| ATOM | 2015 | H4 | LIG | 115 | -13.636 | -18.949 | 14.724 | 1.00 | 0.00 |
| ATOM | 2016 | N2 | LIG | 115 | -13.107 | -20.413 | 16.234 | 1.00 | 0.00 |
| ATOM | 2017 | N3 | LIG | 115 | -12.266 | -20.778 | 9.126  | 1.00 | 0.00 |
| ATOM | 2018 | N4 | LIG | 115 | -13.352 | -20.876 | 17.386 | 1.00 | 0.00 |
| ATOM | 2019 | N5 | LIG | 115 | -11.700 | -21.117 | 8.051  | 1.00 | 0.00 |
| ATOM | 2020 | N6 | LIG | 115 | -14.678 | -17.252 | 21.508 | 1.00 | 0.00 |
| ATOM | 2021 | C1 | LIG | 115 | -12.437 | -21.338 | 12.736 | 1.00 | 0.00 |

|      |      |     |     |     |         |         |        |      |      |
|------|------|-----|-----|-----|---------|---------|--------|------|------|
| ATOM | 2022 | C2  | LIG | 115 | -11.920 | -22.658 | 12.871 | 1.00 | 0.00 |
| ATOM | 2023 | C3  | LIG | 115 | -12.843 | -20.623 | 13.924 | 1.00 | 0.00 |
| ATOM | 2024 | C4  | LIG | 115 | -12.137 | -22.557 | 15.284 | 1.00 | 0.00 |
| ATOM | 2025 | C5  | LIG | 115 | -11.771 | -23.237 | 14.156 | 1.00 | 0.00 |
| ATOM | 2026 | H1  | LIG | 115 | -11.339 | -24.225 | 14.247 | 1.00 | 0.00 |
| ATOM | 2027 | C6  | LIG | 115 | -12.515 | -20.804 | 11.423 | 1.00 | 0.00 |
| ATOM | 2028 | C7  | LIG | 115 | -11.636 | -22.867 | 10.466 | 1.00 | 0.00 |
| ATOM | 2029 | C8  | LIG | 115 | -11.546 | -23.400 | 11.724 | 1.00 | 0.00 |
| ATOM | 2030 | H2  | LIG | 115 | -11.192 | -24.416 | 11.843 | 1.00 | 0.00 |
| ATOM | 2031 | C9  | LIG | 115 | -12.697 | -21.240 | 15.211 | 1.00 | 0.00 |
| ATOM | 2032 | C10 | LIG | 115 | -12.106 | -21.532 | 10.281 | 1.00 | 0.00 |
| ATOM | 2033 | C11 | LIG | 115 | -13.663 | -19.923 | 18.375 | 1.00 | 0.00 |
| ATOM | 2034 | C12 | LIG | 115 | -11.966 | -20.328 | 6.916  | 1.00 | 0.00 |
| ATOM | 2035 | C13 | LIG | 115 | -13.335 | -18.561 | 18.269 | 1.00 | 0.00 |
| ATOM | 2036 | H8  | LIG | 115 | -12.799 | -18.207 | 17.398 | 1.00 | 0.00 |
| ATOM | 2037 | C14 | LIG | 115 | -14.296 | -20.405 | 19.530 | 1.00 | 0.00 |
| ATOM | 2038 | H9  | LIG | 115 | -14.522 | -21.460 | 19.613 | 1.00 | 0.00 |
| ATOM | 2039 | C15 | LIG | 115 | -13.668 | -17.688 | 19.292 | 1.00 | 0.00 |
| ATOM | 2040 | H10 | LIG | 115 | -13.420 | -16.637 | 19.241 | 1.00 | 0.00 |
| ATOM | 2041 | C16 | LIG | 115 | -14.638 | -19.534 | 20.554 | 1.00 | 0.00 |
| ATOM | 2042 | H11 | LIG | 115 | -15.136 | -19.881 | 21.449 | 1.00 | 0.00 |
| ATOM | 2043 | C17 | LIG | 115 | -14.323 | -18.185 | 20.418 | 1.00 | 0.00 |

|      |      |     |     |     |         |         |       |      |      |
|------|------|-----|-----|-----|---------|---------|-------|------|------|
| ATOM | 2044 | C18 | LIG | 115 | -13.028 | -19.412 | 6.826 | 1.00 | 0.00 |
| ATOM | 2045 | H12 | LIG | 115 | -13.717 | -19.306 | 7.654 | 1.00 | 0.00 |
| ATOM | 2046 | C19 | LIG | 115 | -11.111 | -20.519 | 5.821 | 1.00 | 0.00 |
| ATOM | 2047 | H13 | LIG | 115 | -10.311 | -21.246 | 5.893 | 1.00 | 0.00 |
| ATOM | 2048 | C20 | LIG | 115 | -13.204 | -18.681 | 5.662 | 1.00 | 0.00 |
| ATOM | 2049 | H14 | LIG | 115 | -14.028 | -17.981 | 5.585 | 1.00 | 0.00 |
| ATOM | 2050 | C21 | LIG | 115 | -11.289 | -19.773 | 4.662 | 1.00 | 0.00 |
| ATOM | 2051 | H15 | LIG | 115 | -10.621 | -19.916 | 3.822 | 1.00 | 0.00 |
| ATOM | 2052 | C22 | LIG | 115 | -12.333 | -18.852 | 4.581 | 1.00 | 0.00 |
| ATOM | 2053 | H16 | LIG | 115 | -12.480 | -18.279 | 3.673 | 1.00 | 0.00 |

TER

|      |      |    |     |     |        |        |        |      |      |
|------|------|----|-----|-----|--------|--------|--------|------|------|
| ATOM | 2054 | S1 | LIG | 116 | 13.801 | 25.766 | 3.292  | 1.00 | 0.00 |
| ATOM | 2055 | S2 | LIG | 116 | 8.984  | 25.620 | 9.381  | 1.00 | 0.00 |
| ATOM | 2056 | O1 | LIG | 116 | 14.146 | 25.347 | 10.180 | 1.00 | 0.00 |
| ATOM | 2057 | H5 | LIG | 116 | 13.732 | 25.369 | 11.069 | 1.00 | 0.00 |
| ATOM | 2058 | O2 | LIG | 116 | 14.467 | 24.411 | 2.749  | 1.00 | 0.00 |
| ATOM | 2059 | H6 | LIG | 116 | 15.368 | 24.399 | 3.194  | 1.00 | 0.00 |
| ATOM | 2060 | O3 | LIG | 116 | 8.842  | 26.926 | 10.307 | 1.00 | 0.00 |
| ATOM | 2061 | H7 | LIG | 116 | 9.467  | 26.751 | 11.069 | 1.00 | 0.00 |
| ATOM | 2062 | O4 | LIG | 116 | 12.442 | 25.794 | 2.791  | 1.00 | 0.00 |
| ATOM | 2063 | O5 | LIG | 116 | 14.703 | 26.887 | 3.072  | 1.00 | 0.00 |
| ATOM | 2064 | O6 | LIG | 116 | 8.184  | 25.856 | 8.197  | 1.00 | 0.00 |

|      |      |    |     |     |        |        |        |      |      |
|------|------|----|-----|-----|--------|--------|--------|------|------|
| ATOM | 2065 | O7 | LIG | 116 | 8.801  | 24.423 | 10.187 | 1.00 | 0.00 |
| ATOM | 2066 | O8 | LIG | 116 | 22.797 | 25.377 | 3.722  | 1.00 | 0.00 |
| ATOM | 2067 | O9 | LIG | 116 | 22.320 | 24.129 | 2.011  | 1.00 | 0.00 |
| ATOM | 2068 | N1 | LIG | 116 | 15.798 | 25.091 | 8.119  | 1.00 | 0.00 |
| ATOM | 2069 | H3 | LIG | 116 | 15.725 | 25.132 | 9.123  | 1.00 | 0.00 |
| ATOM | 2070 | H4 | LIG | 116 | 16.693 | 25.020 | 7.660  | 1.00 | 0.00 |
| ATOM | 2071 | N2 | LIG | 116 | 16.211 | 25.182 | 5.552  | 1.00 | 0.00 |
| ATOM | 2072 | N3 | LIG | 116 | 11.832 | 25.598 | 11.210 | 1.00 | 0.00 |
| ATOM | 2073 | N4 | LIG | 116 | 16.531 | 24.865 | 4.369  | 1.00 | 0.00 |
| ATOM | 2074 | N5 | LIG | 116 | 10.831 | 26.002 | 11.862 | 1.00 | 0.00 |
| ATOM | 2075 | N6 | LIG | 116 | 22.010 | 24.768 | 3.007  | 1.00 | 0.00 |
| ATOM | 2076 | C1 | LIG | 116 | 13.395 | 25.425 | 7.908  | 1.00 | 0.00 |
| ATOM | 2077 | C2 | LIG | 116 | 12.283 | 25.561 | 7.030  | 1.00 | 0.00 |
| ATOM | 2078 | C3 | LIG | 116 | 14.718 | 25.283 | 7.343  | 1.00 | 0.00 |
| ATOM | 2079 | C4 | LIG | 116 | 13.734 | 25.478 | 5.088  | 1.00 | 0.00 |
| ATOM | 2080 | C5 | LIG | 116 | 12.483 | 25.595 | 5.627  | 1.00 | 0.00 |
| ATOM | 2081 | H1 | LIG | 116 | 11.633 | 25.739 | 4.972  | 1.00 | 0.00 |
| ATOM | 2082 | C6 | LIG | 116 | 13.127 | 25.445 | 9.301  | 1.00 | 0.00 |
| ATOM | 2083 | C7 | LIG | 116 | 10.733 | 25.677 | 8.899  | 1.00 | 0.00 |
| ATOM | 2084 | C8 | LIG | 116 | 10.970 | 25.666 | 7.550  | 1.00 | 0.00 |
| ATOM | 2085 | H2 | LIG | 116 | 10.133 | 25.728 | 6.867  | 1.00 | 0.00 |
| ATOM | 2086 | C9 | LIG | 116 | 14.889 | 25.304 | 5.919  | 1.00 | 0.00 |

|      |      |     |     |     |        |        |        |      |      |
|------|------|-----|-----|-----|--------|--------|--------|------|------|
| ATOM | 2087 | C10 | LIG | 116 | 11.819 | 25.589 | 9.821  | 1.00 | 0.00 |
| ATOM | 2088 | C11 | LIG | 116 | 17.911 | 24.872 | 4.086  | 1.00 | 0.00 |
| ATOM | 2089 | C12 | LIG | 116 | 10.912 | 25.920 | 13.265 | 1.00 | 0.00 |
| ATOM | 2090 | C13 | LIG | 116 | 18.858 | 25.561 | 4.862  | 1.00 | 0.00 |
| ATOM | 2091 | H8  | LIG | 116 | 18.530 | 26.138 | 5.716  | 1.00 | 0.00 |
| ATOM | 2092 | C14 | LIG | 116 | 18.316 | 24.178 | 2.937  | 1.00 | 0.00 |
| ATOM | 2093 | H9  | LIG | 116 | 17.576 | 23.671 | 2.331  | 1.00 | 0.00 |
| ATOM | 2094 | C15 | LIG | 116 | 20.197 | 25.526 | 4.510  | 1.00 | 0.00 |
| ATOM | 2095 | H10 | LIG | 116 | 20.946 | 26.054 | 5.084  | 1.00 | 0.00 |
| ATOM | 2096 | C16 | LIG | 116 | 19.657 | 24.134 | 2.584  | 1.00 | 0.00 |
| ATOM | 2097 | H11 | LIG | 116 | 19.994 | 23.596 | 1.709  | 1.00 | 0.00 |
| ATOM | 2098 | C17 | LIG | 116 | 20.580 | 24.805 | 3.380  | 1.00 | 0.00 |
| ATOM | 2099 | C18 | LIG | 116 | 11.864 | 25.151 | 13.955 | 1.00 | 0.00 |
| ATOM | 2100 | H12 | LIG | 116 | 12.576 | 24.554 | 13.400 | 1.00 | 0.00 |
| ATOM | 2101 | C19 | LIG | 116 | 9.945  | 26.643 | 13.978 | 1.00 | 0.00 |
| ATOM | 2102 | H13 | LIG | 116 | 9.199  | 27.212 | 13.436 | 1.00 | 0.00 |
| ATOM | 2103 | C20 | LIG | 116 | 11.859 | 25.139 | 15.341 | 1.00 | 0.00 |
| ATOM | 2104 | H14 | LIG | 116 | 12.586 | 24.539 | 15.876 | 1.00 | 0.00 |
| ATOM | 2105 | C21 | LIG | 116 | 9.955  | 26.632 | 15.368 | 1.00 | 0.00 |
| ATOM | 2106 | H15 | LIG | 116 | 9.212  | 27.199 | 15.916 | 1.00 | 0.00 |
| ATOM | 2107 | C22 | LIG | 116 | 10.912 | 25.883 | 16.052 | 1.00 | 0.00 |
| ATOM | 2108 | H16 | LIG | 116 | 10.912 | 25.863 | 17.135 | 1.00 | 0.00 |

TER

|      |      |    |     |     |         |         |         |      |      |
|------|------|----|-----|-----|---------|---------|---------|------|------|
| ATOM | 2109 | S1 | LIG | 117 | -8.153  | -25.813 | -17.240 | 1.00 | 0.00 |
| ATOM | 2110 | S2 | LIG | 117 | -2.588  | -24.625 | -22.524 | 1.00 | 0.00 |
| ATOM | 2111 | O1 | LIG | 117 | -4.896  | -20.517 | -20.254 | 1.00 | 0.00 |
| ATOM | 2112 | H5 | LIG | 117 | -4.197  | -20.150 | -20.837 | 1.00 | 0.00 |
| ATOM | 2113 | O2 | LIG | 117 | -9.699  | -25.642 | -17.635 | 1.00 | 0.00 |
| ATOM | 2114 | H6 | LIG | 117 | -9.913  | -24.705 | -17.342 | 1.00 | 0.00 |
| ATOM | 2115 | O3 | LIG | 117 | -1.128  | -24.156 | -22.042 | 1.00 | 0.00 |
| ATOM | 2116 | H7 | LIG | 117 | -1.146  | -23.161 | -22.150 | 1.00 | 0.00 |
| ATOM | 2117 | O4 | LIG | 117 | -7.731  | -27.102 | -17.748 | 1.00 | 0.00 |
| ATOM | 2118 | O5 | LIG | 117 | -7.954  | -25.456 | -15.843 | 1.00 | 0.00 |
| ATOM | 2119 | O6 | LIG | 117 | -2.670  | -26.052 | -22.289 | 1.00 | 0.00 |
| ATOM | 2120 | O7 | LIG | 117 | -2.879  | -24.058 | -23.832 | 1.00 | 0.00 |
| ATOM | 2121 | O8 | LIG | 117 | -12.636 | -19.363 | -12.817 | 1.00 | 0.00 |
| ATOM | 2122 | O9 | LIG | 117 | -14.173 | -20.829 | -13.264 | 1.00 | 0.00 |
| ATOM | 2123 | N1 | LIG | 117 | -6.999  | -20.878 | -18.677 | 1.00 | 0.00 |
| ATOM | 2124 | H3 | LIG | 117 | -6.394  | -20.198 | -19.108 | 1.00 | 0.00 |
| ATOM | 2125 | H4 | LIG | 117 | -7.738  | -20.600 | -18.049 | 1.00 | 0.00 |
| ATOM | 2126 | N2 | LIG | 117 | -8.525  | -22.479 | -17.306 | 1.00 | 0.00 |
| ATOM | 2127 | N3 | LIG | 117 | -3.026  | -21.356 | -21.762 | 1.00 | 0.00 |
| ATOM | 2128 | N4 | LIG | 117 | -9.537  | -23.098 | -16.865 | 1.00 | 0.00 |
| ATOM | 2129 | N5 | LIG | 117 | -1.903  | -21.593 | -22.286 | 1.00 | 0.00 |

|      |      |     |     |     |         |         |         |      |      |
|------|------|-----|-----|-----|---------|---------|---------|------|------|
| ATOM | 2130 | N6  | LIG | 117 | -13.047 | -20.367 | -13.386 | 1.00 | 0.00 |
| ATOM | 2131 | C1  | LIG | 117 | -5.697  | -22.690 | -19.650 | 1.00 | 0.00 |
| ATOM | 2132 | C2  | LIG | 117 | -5.528  | -24.097 | -19.786 | 1.00 | 0.00 |
| ATOM | 2133 | C3  | LIG | 117 | -6.752  | -22.193 | -18.797 | 1.00 | 0.00 |
| ATOM | 2134 | C4  | LIG | 117 | -7.348  | -24.523 | -18.242 | 1.00 | 0.00 |
| ATOM | 2135 | C5  | LIG | 117 | -6.360  | -24.988 | -19.063 | 1.00 | 0.00 |
| ATOM | 2136 | H1  | LIG | 117 | -6.194  | -26.055 | -19.145 | 1.00 | 0.00 |
| ATOM | 2137 | C6  | LIG | 117 | -4.799  | -21.857 | -20.367 | 1.00 | 0.00 |
| ATOM | 2138 | C7  | LIG | 117 | -3.674  | -23.795 | -21.330 | 1.00 | 0.00 |
| ATOM | 2139 | C8  | LIG | 117 | -4.526  | -24.617 | -20.642 | 1.00 | 0.00 |
| ATOM | 2140 | H2  | LIG | 117 | -4.438  | -25.689 | -20.764 | 1.00 | 0.00 |
| ATOM | 2141 | C9  | LIG | 117 | -7.590  | -23.119 | -18.090 | 1.00 | 0.00 |
| ATOM | 2142 | C10 | LIG | 117 | -3.774  | -22.378 | -21.192 | 1.00 | 0.00 |
| ATOM | 2143 | C11 | LIG | 117 | -10.368 | -22.369 | -15.991 | 1.00 | 0.00 |
| ATOM | 2144 | C12 | LIG | 117 | -1.243  | -20.508 | -22.892 | 1.00 | 0.00 |
| ATOM | 2145 | C13 | LIG | 117 | -9.948  | -21.218 | -15.302 | 1.00 | 0.00 |
| ATOM | 2146 | H8  | LIG | 117 | -8.932  | -20.867 | -15.421 | 1.00 | 0.00 |
| ATOM | 2147 | C14 | LIG | 117 | -11.660 | -22.874 | -15.792 | 1.00 | 0.00 |
| ATOM | 2148 | H9  | LIG | 117 | -11.967 | -23.775 | -16.308 | 1.00 | 0.00 |
| ATOM | 2149 | C15 | LIG | 117 | -10.824 | -20.564 | -14.453 | 1.00 | 0.00 |
| ATOM | 2150 | H10 | LIG | 117 | -10.525 | -19.682 | -13.903 | 1.00 | 0.00 |
| ATOM | 2151 | C16 | LIG | 117 | -12.544 | -22.218 | -14.947 | 1.00 | 0.00 |



|      |      |     |     |     |         |         |         |      |      |
|------|------|-----|-----|-----|---------|---------|---------|------|------|
| ATOM | 2152 | H11 | LIG | 117 | -13.549 | -22.582 | -14.787 | 1.00 | 0.00 |
| ATOM | 2153 | C17 | LIG | 117 | -12.114 | -21.068 | -14.293 | 1.00 | 0.00 |
| ATOM | 2154 | C18 | LIG | 117 | -1.866  | -19.293 | -23.223 | 1.00 | 0.00 |
| ATOM | 2155 | H12 | LIG | 117 | -2.924  | -19.164 | -23.038 | 1.00 | 0.00 |
| ATOM | 2156 | C19 | LIG | 117 | 0.113   | -20.705 | -23.192 | 1.00 | 0.00 |
| ATOM | 2157 | H13 | LIG | 117 | 0.577   | -21.655 | -22.956 | 1.00 | 0.00 |
| ATOM | 2158 | C20 | LIG | 117 | -1.125  | -18.284 | -23.818 | 1.00 | 0.00 |
| ATOM | 2159 | H14 | LIG | 117 | -1.605  | -17.349 | -24.085 | 1.00 | 0.00 |
| ATOM | 2160 | C21 | LIG | 117 | 0.850   | -19.683 | -23.779 | 1.00 | 0.00 |
| ATOM | 2161 | H15 | LIG | 117 | 1.899   | -19.835 | -24.001 | 1.00 | 0.00 |
| ATOM | 2162 | C22 | LIG | 117 | 0.234   | -18.471 | -24.091 | 1.00 | 0.00 |
| ATOM | 2163 | H16 | LIG | 117 | 0.805   | -17.678 | -24.561 | 1.00 | 0.00 |
| TER  |      |     |     |     |         |         |         |      |      |
| ATOM | 2164 | S1  | LIG | 118 | 13.302  | 17.171  | 9.087   | 1.00 | 0.00 |
| ATOM | 2165 | S2  | LIG | 118 | 7.484   | 13.243  | 12.409  | 1.00 | 0.00 |
| ATOM | 2166 | O1  | LIG | 118 | 12.052  | 10.841  | 11.561  | 1.00 | 0.00 |
| ATOM | 2167 | H5  | LIG | 118 | 11.486  | 10.193  | 12.031  | 1.00 | 0.00 |
| ATOM | 2168 | O2  | LIG | 118 | 13.642  | 16.961  | 7.533   | 1.00 | 0.00 |
| ATOM | 2169 | H6  | LIG | 118 | 14.385  | 16.285  | 7.546   | 1.00 | 0.00 |
| ATOM | 2170 | O3  | LIG | 118 | 7.538   | 12.934  | 13.985  | 1.00 | 0.00 |
| ATOM | 2171 | H7  | LIG | 118 | 7.911   | 12.007  | 14.037  | 1.00 | 0.00 |
| ATOM | 2172 | O4  | LIG | 118 | 12.147  | 18.043  | 9.150   | 1.00 | 0.00 |

|      |      |    |     |     |        |        |        |      |      |
|------|------|----|-----|-----|--------|--------|--------|------|------|
| ATOM | 2173 | O5 | LIG | 118 | 14.518 | 17.483 | 9.825  | 1.00 | 0.00 |
| ATOM | 2174 | O6 | LIG | 118 | 7.056  | 14.619 | 12.265 | 1.00 | 0.00 |
| ATOM | 2175 | O7 | LIG | 118 | 6.795  | 12.163 | 11.720 | 1.00 | 0.00 |
| ATOM | 2176 | O8 | LIG | 118 | 21.491 | 13.863 | 7.278  | 1.00 | 0.00 |
| ATOM | 2177 | O9 | LIG | 118 | 21.041 | 15.076 | 5.535  | 1.00 | 0.00 |
| ATOM | 2178 | N1 | LIG | 118 | 13.952 | 12.054 | 10.161 | 1.00 | 0.00 |
| ATOM | 2179 | H3 | LIG | 118 | 13.685 | 11.206 | 10.634 | 1.00 | 0.00 |
| ATOM | 2180 | H4 | LIG | 118 | 14.863 | 12.157 | 9.740  | 1.00 | 0.00 |
| ATOM | 2181 | N2 | LIG | 118 | 14.904 | 14.223 | 9.082  | 1.00 | 0.00 |
| ATOM | 2182 | N3 | LIG | 118 | 9.750  | 10.739 | 12.641 | 1.00 | 0.00 |
| ATOM | 2183 | N4 | LIG | 118 | 15.360 | 15.054 | 8.243  | 1.00 | 0.00 |
| ATOM | 2184 | N5 | LIG | 118 | 8.798  | 10.618 | 13.458 | 1.00 | 0.00 |
| ATOM | 2185 | N6 | LIG | 118 | 20.729 | 14.521 | 6.580  | 1.00 | 0.00 |
| ATOM | 2186 | C1 | LIG | 118 | 11.853 | 13.104 | 10.808 | 1.00 | 0.00 |
| ATOM | 2187 | C2 | LIG | 118 | 11.039 | 14.272 | 10.760 | 1.00 | 0.00 |
| ATOM | 2188 | C3 | LIG | 118 | 13.164 | 13.142 | 10.201 | 1.00 | 0.00 |
| ATOM | 2189 | C4 | LIG | 118 | 12.777 | 15.505 | 9.602  | 1.00 | 0.00 |
| ATOM | 2190 | C5 | LIG | 118 | 11.531 | 15.459 | 10.162 | 1.00 | 0.00 |
| ATOM | 2191 | H1 | LIG | 118 | 10.918 | 16.351 | 10.169 | 1.00 | 0.00 |
| ATOM | 2192 | C6 | LIG | 118 | 11.315 | 11.966 | 11.462 | 1.00 | 0.00 |
| ATOM | 2193 | C7 | LIG | 118 | 9.234  | 13.146 | 11.936 | 1.00 | 0.00 |
| ATOM | 2194 | C8 | LIG | 118 | 9.736  | 14.258 | 11.314 | 1.00 | 0.00 |

|      |      |     |     |     |        |        |        |      |      |
|------|------|-----|-----|-----|--------|--------|--------|------|------|
| ATOM | 2195 | H2  | LIG | 118 | 9.117  | 15.142 | 11.234 | 1.00 | 0.00 |
| ATOM | 2196 | C9  | LIG | 118 | 13.629 | 14.353 | 9.587  | 1.00 | 0.00 |
| ATOM | 2197 | C10 | LIG | 118 | 10.027 | 11.965 | 12.049 | 1.00 | 0.00 |
| ATOM | 2198 | C11 | LIG | 118 | 16.708 | 14.878 | 7.877  | 1.00 | 0.00 |
| ATOM | 2199 | C12 | LIG | 118 | 8.553  | 9.327  | 13.963 | 1.00 | 0.00 |
| ATOM | 2200 | C13 | LIG | 118 | 17.630 | 14.145 | 8.644  | 1.00 | 0.00 |
| ATOM | 2201 | H8  | LIG | 118 | 17.312 | 13.698 | 9.576  | 1.00 | 0.00 |
| ATOM | 2202 | C14 | LIG | 118 | 17.125 | 15.519 | 6.702  | 1.00 | 0.00 |
| ATOM | 2203 | H9  | LIG | 118 | 16.414 | 16.103 | 6.131  | 1.00 | 0.00 |
| ATOM | 2204 | C15 | LIG | 118 | 18.943 | 14.027 | 8.219  | 1.00 | 0.00 |
| ATOM | 2205 | H10 | LIG | 118 | 19.675 | 13.477 | 8.793  | 1.00 | 0.00 |
| ATOM | 2206 | C16 | LIG | 118 | 18.438 | 15.398 | 6.268  | 1.00 | 0.00 |
| ATOM | 2207 | H11 | LIG | 118 | 18.779 | 15.874 | 5.360  | 1.00 | 0.00 |
| ATOM | 2208 | C17 | LIG | 118 | 19.327 | 14.649 | 7.032  | 1.00 | 0.00 |
| ATOM | 2209 | C18 | LIG | 118 | 9.072  | 8.150  | 13.397 | 1.00 | 0.00 |
| ATOM | 2210 | H12 | LIG | 118 | 9.678  | 8.206  | 12.503 | 1.00 | 0.00 |
| ATOM | 2211 | C19 | LIG | 118 | 7.712  | 9.255  | 15.083 | 1.00 | 0.00 |
| ATOM | 2212 | H13 | LIG | 118 | 7.297  | 10.167 | 15.495 | 1.00 | 0.00 |
| ATOM | 2213 | C20 | LIG | 118 | 8.772  | 6.925  | 13.972 | 1.00 | 0.00 |
| ATOM | 2214 | H14 | LIG | 118 | 9.162  | 6.014  | 13.533 | 1.00 | 0.00 |
| ATOM | 2215 | C21 | LIG | 118 | 7.426  | 8.022  | 15.658 | 1.00 | 0.00 |
| ATOM | 2216 | H15 | LIG | 118 | 6.784  | 7.971  | 16.528 | 1.00 | 0.00 |

|      |      |     |     |     |        |         |         |      |      |
|------|------|-----|-----|-----|--------|---------|---------|------|------|
| ATOM | 2217 | C22 | LIG | 118 | 7.956  | 6.857   | 15.106  | 1.00 | 0.00 |
| ATOM | 2218 | H16 | LIG | 118 | 7.723  | 5.894   | 15.547  | 1.00 | 0.00 |
| TER  |      |     |     |     |        |         |         |      |      |
| ATOM | 2219 | S1  | LIG | 119 | 21.802 | -19.705 | -10.797 | 1.00 | 0.00 |
| ATOM | 2220 | S2  | LIG | 119 | 23.612 | -22.021 | -17.984 | 1.00 | 0.00 |
| ATOM | 2221 | O1  | LIG | 119 | 18.598 | -21.220 | -16.728 | 1.00 | 0.00 |
| ATOM | 2222 | H5  | LIG | 119 | 18.608 | -21.450 | -17.682 | 1.00 | 0.00 |
| ATOM | 2223 | O2  | LIG | 119 | 21.230 | -20.753 | -9.724  | 1.00 | 0.00 |
| ATOM | 2224 | H6  | LIG | 119 | 20.234 | -20.632 | -9.787  | 1.00 | 0.00 |
| ATOM | 2225 | O3  | LIG | 119 | 23.547 | -20.966 | -19.194 | 1.00 | 0.00 |
| ATOM | 2226 | H7  | LIG | 119 | 22.646 | -21.119 | -19.601 | 1.00 | 0.00 |
| ATOM | 2227 | O4  | LIG | 119 | 23.235 | -19.907 | -10.857 | 1.00 | 0.00 |
| ATOM | 2228 | O5  | LIG | 119 | 21.241 | -18.384 | -10.550 | 1.00 | 0.00 |
| ATOM | 2229 | O6  | LIG | 119 | 24.853 | -21.776 | -17.279 | 1.00 | 0.00 |
| ATOM | 2230 | O7  | LIG | 119 | 23.272 | -23.349 | -18.472 | 1.00 | 0.00 |
| ATOM | 2231 | O8  | LIG | 119 | 13.472 | -18.059 | -7.768  | 1.00 | 0.00 |
| ATOM | 2232 | O9  | LIG | 119 | 14.425 | -19.068 | -6.099  | 1.00 | 0.00 |
| ATOM | 2233 | N1  | LIG | 119 | 17.922 | -20.724 | -14.211 | 1.00 | 0.00 |
| ATOM | 2234 | H3  | LIG | 119 | 17.580 | -20.876 | -15.146 | 1.00 | 0.00 |
| ATOM | 2235 | H4  | LIG | 119 | 17.295 | -20.504 | -13.452 | 1.00 | 0.00 |
| ATOM | 2236 | N2  | LIG | 119 | 18.619 | -20.095 | -11.784 | 1.00 | 0.00 |
| ATOM | 2237 | N3  | LIG | 119 | 20.293 | -21.697 | -18.566 | 1.00 | 0.00 |

|      |      |     |     |     |        |         |         |      |      |
|------|------|-----|-----|-----|--------|---------|---------|------|------|
| ATOM | 2238 | N4  | LIG | 119 | 18.771 | -20.118 | -10.528 | 1.00 | 0.00 |
| ATOM | 2239 | N5  | LIG | 119 | 20.984 | -21.656 | -19.620 | 1.00 | 0.00 |
| ATOM | 2240 | N6  | LIG | 119 | 14.386 | -18.701 | -7.265  | 1.00 | 0.00 |
| ATOM | 2241 | C1  | LIG | 119 | 20.219 | -20.926 | -14.992 | 1.00 | 0.00 |
| ATOM | 2242 | C2  | LIG | 119 | 21.601 | -20.903 | -14.649 | 1.00 | 0.00 |
| ATOM | 2243 | C3  | LIG | 119 | 19.241 | -20.657 | -13.963 | 1.00 | 0.00 |
| ATOM | 2244 | C4  | LIG | 119 | 21.082 | -20.308 | -12.357 | 1.00 | 0.00 |
| ATOM | 2245 | C5  | LIG | 119 | 22.003 | -20.581 | -13.329 | 1.00 | 0.00 |
| ATOM | 2246 | H1  | LIG | 119 | 23.058 | -20.527 | -13.092 | 1.00 | 0.00 |
| ATOM | 2247 | C6  | LIG | 119 | 19.891 | -21.211 | -16.342 | 1.00 | 0.00 |
| ATOM | 2248 | C7  | LIG | 119 | 22.244 | -21.477 | -16.922 | 1.00 | 0.00 |
| ATOM | 2249 | C8  | LIG | 119 | 22.584 | -21.198 | -15.625 | 1.00 | 0.00 |
| ATOM | 2250 | H2  | LIG | 119 | 23.627 | -21.214 | -15.338 | 1.00 | 0.00 |
| ATOM | 2251 | C9  | LIG | 119 | 19.675 | -20.349 | -12.630 | 1.00 | 0.00 |
| ATOM | 2252 | C10 | LIG | 119 | 20.875 | -21.468 | -17.326 | 1.00 | 0.00 |
| ATOM | 2253 | C11 | LIG | 119 | 17.647 | -19.742 | -9.768  | 1.00 | 0.00 |
| ATOM | 2254 | C12 | LIG | 119 | 20.323 | -21.959 | -20.825 | 1.00 | 0.00 |
| ATOM | 2255 | C13 | LIG | 119 | 16.575 | -18.997 | -10.287 | 1.00 | 0.00 |
| ATOM | 2256 | H8  | LIG | 119 | 16.602 | -18.669 | -11.317 | 1.00 | 0.00 |
| ATOM | 2257 | C14 | LIG | 119 | 17.654 | -20.112 | -8.415  | 1.00 | 0.00 |
| ATOM | 2258 | H9  | LIG | 119 | 18.497 | -20.665 | -8.018  | 1.00 | 0.00 |
| ATOM | 2259 | C15 | LIG | 119 | 15.509 | -18.658 | -9.470  | 1.00 | 0.00 |

|      |      |     |     |     |        |         |         |      |      |
|------|------|-----|-----|-----|--------|---------|---------|------|------|
| ATOM | 2260 | H10 | LIG | 119 | 14.675 | -18.078 | -9.839  | 1.00 | 0.00 |
| ATOM | 2261 | C16 | LIG | 119 | 16.586 | -19.782 | -7.594  | 1.00 | 0.00 |
| ATOM | 2262 | H11 | LIG | 119 | 16.565 | -20.066 | -6.551  | 1.00 | 0.00 |
| ATOM | 2263 | C17 | LIG | 119 | 15.525 | -19.062 | -8.136  | 1.00 | 0.00 |
| ATOM | 2264 | C18 | LIG | 119 | 19.071 | -22.593 | -20.898 | 1.00 | 0.00 |
| ATOM | 2265 | H12 | LIG | 119 | 18.573 | -22.903 | -19.989 | 1.00 | 0.00 |
| ATOM | 2266 | C19 | LIG | 119 | 21.004 | -21.616 | -22.002 | 1.00 | 0.00 |
| ATOM | 2267 | H13 | LIG | 119 | 21.981 | -21.152 | -21.934 | 1.00 | 0.00 |
| ATOM | 2268 | C20 | LIG | 119 | 18.504 | -22.847 | -22.137 | 1.00 | 0.00 |
| ATOM | 2269 | H14 | LIG | 119 | 17.543 | -23.345 | -22.197 | 1.00 | 0.00 |
| ATOM | 2270 | C21 | LIG | 119 | 20.422 | -21.866 | -23.239 | 1.00 | 0.00 |
| ATOM | 2271 | H15 | LIG | 119 | 20.947 | -21.591 | -24.146 | 1.00 | 0.00 |
| ATOM | 2272 | C22 | LIG | 119 | 19.172 | -22.478 | -23.310 | 1.00 | 0.00 |
| ATOM | 2273 | H16 | LIG | 119 | 18.723 | -22.685 | -24.274 | 1.00 | 0.00 |
| TER  |      |     |     |     |        |         |         |      |      |
| END  |      |     |     |     |        |         |         |      |      |

**Table K:** The number of atoms present in the system of BN-SIs

|      |   |    |     |   |        |         |       |      |      |
|------|---|----|-----|---|--------|---------|-------|------|------|
| ATOM | 1 | N  | GLN | 1 | -8.592 | -10.154 | 3.231 | 1.00 | 0.00 |
| ATOM | 2 | H1 | GLN | 1 | -7.661 | -10.485 | 3.440 | 1.00 | 0.00 |
| ATOM | 3 | H2 | GLN | 1 | -8.823 | -9.408  | 3.871 | 1.00 | 0.00 |
| ATOM | 4 | H3 | GLN | 1 | -8.669 | -10.007 | 2.235 | 1.00 | 0.00 |

|      |    |      |     |   |         |         |       |      |      |
|------|----|------|-----|---|---------|---------|-------|------|------|
| ATOM | 5  | CA   | GLN | 1 | -9.537  | -11.232 | 3.537 | 1.00 | 0.00 |
| ATOM | 6  | HA   | GLN | 1 | -10.239 | -10.894 | 4.299 | 1.00 | 0.00 |
| ATOM | 7  | CB   | GLN | 1 | -10.330 | -11.648 | 2.290 | 1.00 | 0.00 |
| ATOM | 8  | HB2  | GLN | 1 | -10.033 | -11.014 | 1.455 | 1.00 | 0.00 |
| ATOM | 9  | HB3  | GLN | 1 | -10.100 | -12.688 | 2.056 | 1.00 | 0.00 |
| ATOM | 10 | CG   | GLN | 1 | -11.830 | -11.501 | 2.531 | 1.00 | 0.00 |
| ATOM | 11 | HG2  | GLN | 1 | -12.445 | -12.308 | 2.132 | 1.00 | 0.00 |
| ATOM | 12 | HG3  | GLN | 1 | -11.906 | -11.490 | 3.618 | 1.00 | 0.00 |
| ATOM | 13 | CD   | GLN | 1 | -12.355 | -10.180 | 1.994 | 1.00 | 0.00 |
| ATOM | 14 | OE1  | GLN | 1 | -12.713 | -9.279  | 2.734 | 1.00 | 0.00 |
| ATOM | 15 | NE2  | GLN | 1 | -12.251 | -10.020 | 0.688 | 1.00 | 0.00 |
| ATOM | 16 | HE21 | GLN | 1 | -12.579 | -9.167  | 0.259 | 1.00 | 0.00 |
| ATOM | 17 | HE22 | GLN | 1 | -11.844 | -10.752 | 0.123 | 1.00 | 0.00 |
| ATOM | 18 | C    | GLN | 1 | -8.805  | -12.435 | 4.121 | 1.00 | 0.00 |
| ATOM | 19 | O    | GLN | 1 | -9.157  | -12.915 | 5.189 | 1.00 | 0.00 |
| ATOM | 20 | N    | PRO | 2 | -7.747  | -12.886 | 3.425 | 1.00 | 0.00 |
| ATOM | 21 | CD   | PRO | 2 | -7.251  | -12.362 | 2.154 | 1.00 | 0.00 |
| ATOM | 22 | HD2  | PRO | 2 | -6.846  | -11.368 | 2.344 | 1.00 | 0.00 |
| ATOM | 23 | HD3  | PRO | 2 | -8.101  | -12.284 | 1.477 | 1.00 | 0.00 |
| ATOM | 24 | CG   | PRO | 2 | -6.197  | -13.335 | 1.651 | 1.00 | 0.00 |
| ATOM | 25 | HG2  | PRO | 2 | -5.232  | -12.830 | 1.610 | 1.00 | 0.00 |
| ATOM | 26 | HG3  | PRO | 2 | -6.471  | -13.676 | 0.652 | 1.00 | 0.00 |

|      |    |      |     |   |        |         |        |      |      |
|------|----|------|-----|---|--------|---------|--------|------|------|
| ATOM | 27 | CB   | PRO | 2 | -6.174 | -14.501 | 2.638  | 1.00 | 0.00 |
| ATOM | 28 | HB2  | PRO | 2 | -5.154 | -14.762 | 2.921  | 1.00 | 0.00 |
| ATOM | 29 | HB3  | PRO | 2 | -6.668 | -15.376 | 2.216  | 1.00 | 0.00 |
| ATOM | 30 | CA   | PRO | 2 | -6.943 | -14.008 | 3.862  | 1.00 | 0.00 |
| ATOM | 31 | HA   | PRO | 2 | -7.613 | -14.814 | 4.161  | 1.00 | 0.00 |
| ATOM | 32 | C    | PRO | 2 | -6.053 | -13.642 | 5.018  | 1.00 | 0.00 |
| ATOM | 33 | O    | PRO | 2 | -5.064 | -12.961 | 4.806  | 1.00 | 0.00 |
| ATOM | 34 | N    | GLN | 3 | -6.399 | -14.105 | 6.223  | 1.00 | 0.00 |
| ATOM | 35 | H    | GLN | 3 | -7.222 | -14.683 | 6.318  | 1.00 | 0.00 |
| ATOM | 36 | CA   | GLN | 3 | -5.631 | -13.803 | 7.412  | 1.00 | 0.00 |
| ATOM | 37 | HA   | GLN | 3 | -5.557 | -12.723 | 7.535  | 1.00 | 0.00 |
| ATOM | 38 | CB   | GLN | 3 | -6.297 | -14.391 | 8.655  | 1.00 | 0.00 |
| ATOM | 39 | HB2  | GLN | 3 | -7.348 | -14.580 | 8.436  | 1.00 | 0.00 |
| ATOM | 40 | HB3  | GLN | 3 | -5.805 | -15.331 | 8.907  | 1.00 | 0.00 |
| ATOM | 41 | CG   | GLN | 3 | -6.188 | -13.422 | 9.840  | 1.00 | 0.00 |
| ATOM | 42 | HG2  | GLN | 3 | -5.742 | -13.966 | 10.673 | 1.00 | 0.00 |
| ATOM | 43 | HG3  | GLN | 3 | -5.558 | -12.570 | 9.584  | 1.00 | 0.00 |
| ATOM | 44 | CD   | GLN | 3 | -7.545 | -12.909 | 10.269 | 1.00 | 0.00 |
| ATOM | 45 | OE1  | GLN | 3 | -8.165 | -13.423 | 11.179 | 1.00 | 0.00 |
| ATOM | 46 | NE2  | GLN | 3 | -8.011 | -11.897 | 9.559  | 1.00 | 0.00 |
| ATOM | 47 | HE21 | GLN | 3 | -8.911 | -11.499 | 9.784  | 1.00 | 0.00 |
| ATOM | 48 | HE22 | GLN | 3 | -7.465 | -11.527 | 8.794  | 1.00 | 0.00 |



|      |    |     |     |   |        |         |       |      |      |
|------|----|-----|-----|---|--------|---------|-------|------|------|
| ATOM | 49 | C   | GLN | 3 | -4.249 | -14.380 | 7.288 | 1.00 | 0.00 |
| ATOM | 50 | O   | GLN | 3 | -3.308 | -13.803 | 7.760 | 1.00 | 0.00 |
| ATOM | 51 | N   | LYS | 4 | -4.083 | -15.494 | 6.583 | 1.00 | 0.00 |
| ATOM | 52 | H   | LYS | 4 | -4.899 | -15.976 | 6.234 | 1.00 | 0.00 |
| ATOM | 53 | CA  | LYS | 4 | -2.779 | -16.101 | 6.367 | 1.00 | 0.00 |
| ATOM | 54 | HA  | LYS | 4 | -2.428 | -16.580 | 7.281 | 1.00 | 0.00 |
| ATOM | 55 | CB  | LYS | 4 | -2.886 | -17.163 | 5.269 | 1.00 | 0.00 |
| ATOM | 56 | HB2 | LYS | 4 | -2.054 | -17.859 | 5.380 | 1.00 | 0.00 |
| ATOM | 57 | HB3 | LYS | 4 | -3.826 | -17.699 | 5.398 | 1.00 | 0.00 |
| ATOM | 58 | CG  | LYS | 4 | -2.844 | -16.534 | 3.867 | 1.00 | 0.00 |
| ATOM | 59 | HG2 | LYS | 4 | -3.053 | -15.468 | 3.955 | 1.00 | 0.00 |
| ATOM | 60 | HG3 | LYS | 4 | -1.847 | -16.676 | 3.449 | 1.00 | 0.00 |
| ATOM | 61 | CD  | LYS | 4 | -3.878 | -17.181 | 2.947 | 1.00 | 0.00 |
| ATOM | 62 | HD2 | LYS | 4 | -4.841 | -17.203 | 3.458 | 1.00 | 0.00 |
| ATOM | 63 | HD3 | LYS | 4 | -3.963 | -16.586 | 2.038 | 1.00 | 0.00 |
| ATOM | 64 | CE  | LYS | 4 | -3.462 | -18.606 | 2.585 | 1.00 | 0.00 |
| ATOM | 65 | HE2 | LYS | 4 | -3.261 | -18.659 | 1.515 | 1.00 | 0.00 |
| ATOM | 66 | HE3 | LYS | 4 | -2.559 | -18.866 | 3.137 | 1.00 | 0.00 |
| ATOM | 67 | NZ  | LYS | 4 | -4.538 | -19.553 | 2.930 | 1.00 | 0.00 |
| ATOM | 68 | HZ1 | LYS | 4 | -5.375 | -19.313 | 2.418 | 1.00 | 0.00 |
| ATOM | 69 | HZ2 | LYS | 4 | -4.252 | -20.491 | 2.686 | 1.00 | 0.00 |
| ATOM | 70 | HZ3 | LYS | 4 | -4.724 | -19.505 | 3.921 | 1.00 | 0.00 |

|      |    |     |     |   |        |         |       |      |      |
|------|----|-----|-----|---|--------|---------|-------|------|------|
| ATOM | 71 | C   | LYS | 4 | -1.725 | -15.029 | 6.038 | 1.00 | 0.00 |
| ATOM | 72 | O   | LYS | 4 | -0.582 | -15.193 | 6.402 | 1.00 | 0.00 |
| ATOM | 73 | N   | CYX | 5 | -2.169 | -13.930 | 5.402 | 1.00 | 0.00 |
| ATOM | 74 | H   | CYX | 5 | -3.129 | -13.897 | 5.090 | 1.00 | 0.00 |
| ATOM | 75 | CA  | CYX | 5 | -1.330 | -12.813 | 5.126 | 1.00 | 0.00 |
| ATOM | 76 | HA  | CYX | 5 | -0.313 | -13.009 | 5.465 | 1.00 | 0.00 |
| ATOM | 77 | CB  | CYX | 5 | -1.303 | -12.568 | 3.640 | 1.00 | 0.00 |
| ATOM | 78 | HB2 | CYX | 5 | -1.894 | -13.332 | 3.134 | 1.00 | 0.00 |
| ATOM | 79 | HB3 | CYX | 5 | -1.721 | -11.585 | 3.426 | 1.00 | 0.00 |
| ATOM | 80 | SG  | CYX | 5 | 0.363  | -12.646 | 2.914 | 1.00 | 0.00 |
| ATOM | 81 | C   | CYX | 5 | -1.842 | -11.607 | 5.844 | 1.00 | 0.00 |
| ATOM | 82 | O   | CYX | 5 | -1.086 | -10.850 | 6.370 | 1.00 | 0.00 |
| ATOM | 83 | N   | GLN | 6 | -3.152 | -11.416 | 5.967 | 1.00 | 0.00 |
| ATOM | 84 | H   | GLN | 6 | -3.766 | -12.054 | 5.480 | 1.00 | 0.00 |
| ATOM | 85 | CA  | GLN | 6 | -3.742 | -10.311 | 6.686 | 1.00 | 0.00 |
| ATOM | 86 | HA  | GLN | 6 | -3.331 | -9.371  | 6.318 | 1.00 | 0.00 |
| ATOM | 87 | CB  | GLN | 6 | -5.259 | -10.291 | 6.491 | 1.00 | 0.00 |
| ATOM | 88 | HB2 | GLN | 6 | -5.577 | -11.277 | 6.153 | 1.00 | 0.00 |
| ATOM | 89 | HB3 | GLN | 6 | -5.728 | -10.067 | 7.449 | 1.00 | 0.00 |
| ATOM | 90 | CG  | GLN | 6 | -5.675 | -9.244  | 5.465 | 1.00 | 0.00 |
| ATOM | 91 | HG2 | GLN | 6 | -4.761 | -8.739  | 5.152 | 1.00 | 0.00 |
| ATOM | 92 | HG3 | GLN | 6 | -6.149 | -9.706  | 4.599 | 1.00 | 0.00 |

|      |     |      |     |   |        |         |        |      |      |
|------|-----|------|-----|---|--------|---------|--------|------|------|
| ATOM | 93  | CD   | GLN | 6 | -6.621 | -8.216  | 6.043  | 1.00 | 0.00 |
| ATOM | 94  | OE1  | GLN | 6 | -6.641 | -7.917  | 7.222  | 1.00 | 0.00 |
| ATOM | 95  | NE2  | GLN | 6 | -7.483 | -7.698  | 5.179  | 1.00 | 0.00 |
| ATOM | 96  | HE21 | GLN | 6 | -8.148 | -7.004  | 5.488  | 1.00 | 0.00 |
| ATOM | 97  | HE22 | GLN | 6 | -7.470 | -8.000  | 4.215  | 1.00 | 0.00 |
| ATOM | 98  | C    | GLN | 6 | -3.390 | -10.350 | 8.163  | 1.00 | 0.00 |
| ATOM | 99  | O    | GLN | 6 | -3.635 | -9.403  | 8.891  | 1.00 | 0.00 |
| ATOM | 100 | N    | ARG | 7 | -2.824 | -11.458 | 8.623  | 1.00 | 0.00 |
| ATOM | 101 | H    | ARG | 7 | -2.700 | -12.208 | 7.957  | 1.00 | 0.00 |
| ATOM | 102 | CA   | ARG | 7 | -2.413 | -11.678 | 9.977  | 1.00 | 0.00 |
| ATOM | 103 | HA   | ARG | 7 | -2.818 | -10.887 | 10.608 | 1.00 | 0.00 |
| ATOM | 104 | CB   | ARG | 7 | -2.908 | -13.028 | 10.506 | 1.00 | 0.00 |
| ATOM | 105 | HB2  | ARG | 7 | -3.713 | -13.387 | 9.864  | 1.00 | 0.00 |
| ATOM | 106 | HB3  | ARG | 7 | -2.083 | -13.741 | 10.486 | 1.00 | 0.00 |
| ATOM | 107 | CG   | ARG | 7 | -3.423 | -12.886 | 11.935 | 1.00 | 0.00 |
| ATOM | 108 | HG2  | ARG | 7 | -2.695 | -12.319 | 12.514 | 1.00 | 0.00 |
| ATOM | 109 | HG3  | ARG | 7 | -4.370 | -12.346 | 11.913 | 1.00 | 0.00 |
| ATOM | 110 | CD   | ARG | 7 | -3.633 | -14.259 | 12.583 | 1.00 | 0.00 |
| ATOM | 111 | HD2  | ARG | 7 | -4.627 | -14.635 | 12.338 | 1.00 | 0.00 |
| ATOM | 112 | HD3  | ARG | 7 | -2.881 | -14.959 | 12.217 | 1.00 | 0.00 |
| ATOM | 113 | NE   | ARG | 7 | -3.513 | -14.160 | 14.052 | 1.00 | 0.00 |
| ATOM | 114 | HE   | ARG | 7 | -4.375 | -14.068 | 14.570 | 1.00 | 0.00 |

|      |     |      |     |   |        |         |        |      |      |
|------|-----|------|-----|---|--------|---------|--------|------|------|
| ATOM | 115 | CZ   | ARG | 7 | -2.371 | -14.178 | 14.723 | 1.00 | 0.00 |
| ATOM | 116 | NH1  | ARG | 7 | -1.229 | -14.309 | 14.089 | 1.00 | 0.00 |
| ATOM | 117 | HH11 | ARG | 7 | -1.221 | -14.397 | 13.083 | 1.00 | 0.00 |
| ATOM | 118 | HH12 | ARG | 7 | -0.364 | -14.322 | 14.610 | 1.00 | 0.00 |
| ATOM | 119 | NH2  | ARG | 7 | -2.369 | -14.071 | 16.030 | 1.00 | 0.00 |
| ATOM | 120 | HH21 | ARG | 7 | -3.243 | -13.975 | 16.527 | 1.00 | 0.00 |
| ATOM | 121 | HH22 | ARG | 7 | -1.494 | -14.086 | 16.533 | 1.00 | 0.00 |
| ATOM | 122 | C    | ARG | 7 | -0.912 | -11.624 | 10.078 | 1.00 | 0.00 |
| ATOM | 123 | O    | ARG | 7 | -0.436 | -11.631 | 11.186 | 1.00 | 0.00 |
| ATOM | 124 | N    | GLU | 8 | -0.216 | -11.612 | 8.954  | 1.00 | 0.00 |
| ATOM | 125 | H    | GLU | 8 | -0.714 | -11.705 | 8.080  | 1.00 | 0.00 |
| ATOM | 126 | CA   | GLU | 8 | 1.229  | -11.535 | 8.915  | 1.00 | 0.00 |
| ATOM | 127 | HA   | GLU | 8 | 1.631  | -11.577 | 9.927  | 1.00 | 0.00 |
| ATOM | 128 | CB   | GLU | 8 | 1.798  | -12.707 | 8.115  | 1.00 | 0.00 |
| ATOM | 129 | HB2  | GLU | 8 | 0.975  | -13.251 | 7.650  | 1.00 | 0.00 |
| ATOM | 130 | HB3  | GLU | 8 | 2.460  | -12.319 | 7.341  | 1.00 | 0.00 |
| ATOM | 131 | CG   | GLU | 8 | 2.583  | -13.654 | 9.030  | 1.00 | 0.00 |
| ATOM | 132 | HG2  | GLU | 8 | 2.239  | -13.459 | 10.045 | 1.00 | 0.00 |
| ATOM | 133 | HG3  | GLU | 8 | 2.391  | -14.697 | 8.776  | 1.00 | 0.00 |
| ATOM | 134 | CD   | GLU | 8 | 4.087  | -13.375 | 8.938  | 1.00 | 0.00 |
| ATOM | 135 | OE1  | GLU | 8 | 4.646  | -13.639 | 7.854  | 1.00 | 0.00 |
| ATOM | 136 | OE2  | GLU | 8 | 4.643  | -12.959 | 9.973  | 1.00 | 0.00 |

|      |     |     |     |   |        |         |       |      |      |
|------|-----|-----|-----|---|--------|---------|-------|------|------|
| ATOM | 137 | C   | GLU | 8 | 1.705  | -10.214 | 8.328 | 1.00 | 0.00 |
| ATOM | 138 | O   | GLU | 8 | 2.773  | -9.729  | 8.644 | 1.00 | 0.00 |
| ATOM | 139 | N   | PHE | 9 | 0.846  | -9.558  | 7.560 | 1.00 | 0.00 |
| ATOM | 140 | H   | PHE | 9 | -0.068 | -9.968  | 7.428 | 1.00 | 0.00 |
| ATOM | 141 | CA  | PHE | 9 | 1.131  | -8.316  | 6.915 | 1.00 | 0.00 |
| ATOM | 142 | HA  | PHE | 9 | 2.169  | -8.283  | 6.585 | 1.00 | 0.00 |
| ATOM | 143 | CB  | PHE | 9 | 0.227  | -8.180  | 5.694 | 1.00 | 0.00 |
| ATOM | 144 | HB2 | PHE | 9 | 0.702  | -8.676  | 4.847 | 1.00 | 0.00 |
| ATOM | 145 | HB3 | PHE | 9 | -0.744 | -8.638  | 5.885 | 1.00 | 0.00 |
| ATOM | 146 | CG  | PHE | 9 | -0.044 | -6.753  | 5.265 | 1.00 | 0.00 |
| ATOM | 147 | CD1 | PHE | 9 | -0.867 | -5.914  | 6.035 | 1.00 | 0.00 |
| ATOM | 148 | HD1 | PHE | 9 | -1.339 | -6.316  | 6.931 | 1.00 | 0.00 |
| ATOM | 149 | CE1 | PHE | 9 | -1.084 | -4.588  | 5.669 | 1.00 | 0.00 |
| ATOM | 150 | HE1 | PHE | 9 | -1.683 | -3.935  | 6.303 | 1.00 | 0.00 |
| ATOM | 151 | CZ  | PHE | 9 | -0.533 | -4.098  | 4.488 | 1.00 | 0.00 |
| ATOM | 152 | HZ  | PHE | 9 | -0.707 | -3.067  | 4.179 | 1.00 | 0.00 |
| ATOM | 153 | CE2 | PHE | 9 | 0.249  | -4.941  | 3.696 | 1.00 | 0.00 |
| ATOM | 154 | HE2 | PHE | 9 | 0.661  | -4.557  | 2.763 | 1.00 | 0.00 |
| ATOM | 155 | CD2 | PHE | 9 | 0.506  | -6.259  | 4.083 | 1.00 | 0.00 |
| ATOM | 156 | HD2 | PHE | 9 | 1.134  | -6.897  | 3.461 | 1.00 | 0.00 |
| ATOM | 157 | C   | PHE | 9 | 0.863  | -7.203  | 7.885 | 1.00 | 0.00 |
| ATOM | 158 | O   | PHE | 9 | 1.537  | -6.193  | 7.905 | 1.00 | 0.00 |

|      |     |      |     |    |        |        |        |      |      |
|------|-----|------|-----|----|--------|--------|--------|------|------|
| ATOM | 159 | N    | GLN | 10 | -0.210 | -7.330 | 8.682  | 1.00 | 0.00 |
| ATOM | 160 | H    | GLN | 10 | -0.799 | -8.146 | 8.587  | 1.00 | 0.00 |
| ATOM | 161 | CA   | GLN | 10 | -0.598 | -6.312 | 9.629  | 1.00 | 0.00 |
| ATOM | 162 | HA   | GLN | 10 | -0.144 | -5.361 | 9.350  | 1.00 | 0.00 |
| ATOM | 163 | CB   | GLN | 10 | -2.121 | -6.140 | 9.652  | 1.00 | 0.00 |
| ATOM | 164 | HB2  | GLN | 10 | -2.417 | -5.542 | 8.791  | 1.00 | 0.00 |
| ATOM | 165 | HB3  | GLN | 10 | -2.584 | -7.125 | 9.586  | 1.00 | 0.00 |
| ATOM | 166 | CG   | GLN | 10 | -2.580 | -5.444 | 10.941 | 1.00 | 0.00 |
| ATOM | 167 | HG2  | GLN | 10 | -2.432 | -6.103 | 11.796 | 1.00 | 0.00 |
| ATOM | 168 | HG3  | GLN | 10 | -1.979 | -4.544 | 11.068 | 1.00 | 0.00 |
| ATOM | 169 | CD   | GLN | 10 | -4.031 | -5.049 | 10.883 | 1.00 | 0.00 |
| ATOM | 170 | OE1  | GLN | 10 | -4.400 | -4.052 | 10.283 | 1.00 | 0.00 |
| ATOM | 171 | NE2  | GLN | 10 | -4.870 | -5.864 | 11.496 | 1.00 | 0.00 |
| ATOM | 172 | HE21 | GLN | 10 | -5.859 | -5.659 | 11.496 | 1.00 | 0.00 |
| ATOM | 173 | HE22 | GLN | 10 | -4.519 | -6.689 | 11.962 | 1.00 | 0.00 |
| ATOM | 174 | C    | GLN | 10 | -0.055 | -6.683 | 11.003 | 1.00 | 0.00 |
| ATOM | 175 | O    | GLN | 10 | -0.072 | -5.875 | 11.930 | 1.00 | 0.00 |
| ATOM | 176 | N    | GLN | 11 | 0.414  | -7.915 | 11.161 | 1.00 | 0.00 |
| ATOM | 177 | H    | GLN | 11 | 0.370  | -8.567 | 10.390 | 1.00 | 0.00 |
| ATOM | 178 | CA   | GLN | 11 | 0.944  | -8.378 | 12.417 | 1.00 | 0.00 |
| ATOM | 179 | HA   | GLN | 11 | 0.139  | -8.478 | 13.145 | 1.00 | 0.00 |
| ATOM | 180 | CB   | GLN | 11 | 1.613  | -9.736 | 12.241 | 1.00 | 0.00 |

|      |     |      |     |    |       |         |        |      |      |
|------|-----|------|-----|----|-------|---------|--------|------|------|
| ATOM | 181 | HB2  | GLN | 11 | 1.285 | -10.173 | 11.297 | 1.00 | 0.00 |
| ATOM | 182 | HB3  | GLN | 11 | 2.694 | -9.598  | 12.221 | 1.00 | 0.00 |
| ATOM | 183 | CG   | GLN | 11 | 1.240 | -10.673 | 13.393 | 1.00 | 0.00 |
| ATOM | 184 | HG2  | GLN | 11 | 0.421 | -10.202 | 13.936 | 1.00 | 0.00 |
| ATOM | 185 | HG3  | GLN | 11 | 0.915 | -11.644 | 13.018 | 1.00 | 0.00 |
| ATOM | 186 | CD   | GLN | 11 | 2.396 | -10.885 | 14.349 | 1.00 | 0.00 |
| ATOM | 187 | OE1  | GLN | 11 | 3.550 | -10.924 | 13.981 | 1.00 | 0.00 |
| ATOM | 188 | NE2  | GLN | 11 | 2.056 | -11.077 | 15.613 | 1.00 | 0.00 |
| ATOM | 189 | HE21 | GLN | 11 | 2.773 | -11.226 | 16.309 | 1.00 | 0.00 |
| ATOM | 190 | HE22 | GLN | 11 | 1.081 | -11.075 | 15.876 | 1.00 | 0.00 |
| ATOM | 191 | C    | GLN | 11 | 1.932 | -7.377  | 12.985 | 1.00 | 0.00 |
| ATOM | 192 | O    | GLN | 11 | 1.733 | -6.862  | 14.081 | 1.00 | 0.00 |
| ATOM | 193 | N    | GLU | 12 | 2.922 | -7.008  | 12.171 | 1.00 | 0.00 |
| ATOM | 194 | H    | GLU | 12 | 2.992 | -7.421  | 11.252 | 1.00 | 0.00 |
| ATOM | 195 | CA   | GLU | 12 | 3.966 | -6.093  | 12.596 | 1.00 | 0.00 |
| ATOM | 196 | HA   | GLU | 12 | 3.519 | -5.121  | 12.805 | 1.00 | 0.00 |
| ATOM | 197 | CB   | GLU | 12 | 4.692 | -6.581  | 13.859 | 1.00 | 0.00 |
| ATOM | 198 | HB2  | GLU | 12 | 5.716 | -6.208  | 13.833 | 1.00 | 0.00 |
| ATOM | 199 | HB3  | GLU | 12 | 4.179 | -6.173  | 14.730 | 1.00 | 0.00 |
| ATOM | 200 | CG   | GLU | 12 | 4.708 | -8.110  | 13.947 | 1.00 | 0.00 |
| ATOM | 201 | HG2  | GLU | 12 | 3.809 | -8.476  | 14.443 | 1.00 | 0.00 |
| ATOM | 202 | HG3  | GLU | 12 | 4.727 | -8.471  | 12.918 | 1.00 | 0.00 |

|      |     |      |     |    |       |        |        |      |      |
|------|-----|------|-----|----|-------|--------|--------|------|------|
| ATOM | 203 | CD   | GLU | 12 | 5.934 | -8.618 | 14.683 | 1.00 | 0.00 |
| ATOM | 204 | OE1  | GLU | 12 | 6.984 | -8.757 | 14.015 | 1.00 | 0.00 |
| ATOM | 205 | OE2  | GLU | 12 | 5.823 | -8.809 | 15.918 | 1.00 | 0.00 |
| ATOM | 206 | C    | GLU | 12 | 4.952 | -5.853 | 11.461 | 1.00 | 0.00 |
| ATOM | 207 | O    | GLU | 12 | 6.137 | -5.617 | 11.667 | 1.00 | 0.00 |
| ATOM | 208 | N    | GLN | 13 | 4.443 | -5.870 | 10.230 | 1.00 | 0.00 |
| ATOM | 209 | H    | GLN | 13 | 3.466 | -6.091 | 10.098 | 1.00 | 0.00 |
| ATOM | 210 | CA   | GLN | 13 | 5.260 | -5.657 | 9.060  | 1.00 | 0.00 |
| ATOM | 211 | HA   | GLN | 13 | 6.004 | -4.888 | 9.266  | 1.00 | 0.00 |
| ATOM | 212 | CB   | GLN | 13 | 5.986 | -6.946 | 8.665  | 1.00 | 0.00 |
| ATOM | 213 | HB2  | GLN | 13 | 5.407 | -7.800 | 9.018  | 1.00 | 0.00 |
| ATOM | 214 | HB3  | GLN | 13 | 6.068 | -6.987 | 7.579  | 1.00 | 0.00 |
| ATOM | 215 | CG   | GLN | 13 | 7.382 | -6.988 | 9.282  | 1.00 | 0.00 |
| ATOM | 216 | HG2  | GLN | 13 | 7.866 | -6.012 | 9.273  | 1.00 | 0.00 |
| ATOM | 217 | HG3  | GLN | 13 | 7.252 | -7.319 | 10.312 | 1.00 | 0.00 |
| ATOM | 218 | CD   | GLN | 13 | 8.278 | -7.980 | 8.564  | 1.00 | 0.00 |
| ATOM | 219 | OE1  | GLN | 13 | 8.201 | -8.205 | 7.365  | 1.00 | 0.00 |
| ATOM | 220 | NE2  | GLN | 13 | 9.215 | -8.545 | 9.308  | 1.00 | 0.00 |
| ATOM | 221 | HE21 | GLN | 13 | 9.847 | -9.216 | 8.895  | 1.00 | 0.00 |
| ATOM | 222 | HE22 | GLN | 13 | 9.293 | -8.303 | 10.285 | 1.00 | 0.00 |
| ATOM | 223 | C    | GLN | 13 | 4.418 | -5.134 | 7.928  | 1.00 | 0.00 |
| ATOM | 224 | O    | GLN | 13 | 4.437 | -5.670 | 6.859  | 1.00 | 0.00 |



|      |     |     |     |    |       |        |        |      |      |
|------|-----|-----|-----|----|-------|--------|--------|------|------|
| ATOM | 225 | N   | HIE | 14 | 3.634 | -4.088 | 8.182  | 1.00 | 0.00 |
| ATOM | 226 | H   | HIE | 14 | 3.614 | -3.723 | 9.123  | 1.00 | 0.00 |
| ATOM | 227 | CA  | HIE | 14 | 2.739 | -3.509 | 7.202  | 1.00 | 0.00 |
| ATOM | 228 | HA  | HIE | 14 | 2.131 | -4.295 | 6.754  | 1.00 | 0.00 |
| ATOM | 229 | CB  | HIE | 14 | 1.809 | -2.480 | 7.851  | 1.00 | 0.00 |
| ATOM | 230 | HB2 | HIE | 14 | 2.271 | -1.493 | 7.856  | 1.00 | 0.00 |
| ATOM | 231 | HB3 | HIE | 14 | 0.888 | -2.447 | 7.268  | 1.00 | 0.00 |
| ATOM | 232 | CG  | HIE | 14 | 1.410 | -2.774 | 9.267  | 1.00 | 0.00 |
| ATOM | 233 | ND1 | HIE | 14 | 0.858 | -1.846 | 10.115 | 1.00 | 0.00 |
| ATOM | 234 | CE1 | HIE | 14 | 0.634 | -2.431 | 11.299 | 1.00 | 0.00 |
| ATOM | 235 | HE1 | HIE | 14 | 0.170 | -1.880 | 12.117 | 1.00 | 0.00 |
| ATOM | 236 | NE2 | HIE | 14 | 1.067 | -3.692 | 11.227 | 1.00 | 0.00 |
| ATOM | 237 | HE2 | HIE | 14 | 1.052 | -4.364 | 11.981 | 1.00 | 0.00 |
| ATOM | 238 | CD2 | HIE | 14 | 1.538 | -3.938 | 9.966  | 1.00 | 0.00 |
| ATOM | 239 | HD2 | HIE | 14 | 1.915 | -4.928 | 9.708  | 1.00 | 0.00 |
| ATOM | 240 | C   | HIE | 14 | 3.585 | -2.927 | 6.079  | 1.00 | 0.00 |
| ATOM | 241 | O   | HIE | 14 | 4.695 | -3.338 | 5.781  | 1.00 | 0.00 |
| ATOM | 242 | N   | LEU | 15 | 3.087 | -1.850 | 5.474  | 1.00 | 0.00 |
| ATOM | 243 | H   | LEU | 15 | 2.158 | -1.531 | 5.707  | 1.00 | 0.00 |
| ATOM | 244 | CA  | LEU | 15 | 3.790 | -1.185 | 4.401  | 1.00 | 0.00 |
| ATOM | 245 | HA  | LEU | 15 | 4.790 | -1.604 | 4.294  | 1.00 | 0.00 |
| ATOM | 246 | CB  | LEU | 15 | 3.035 | -1.376 | 3.079  | 1.00 | 0.00 |

|      |     |          |    |       |        |       |      |      |
|------|-----|----------|----|-------|--------|-------|------|------|
| ATOM | 247 | HB2 LEU  | 15 | 2.207 | -0.673 | 3.166 | 1.00 | 0.00 |
| ATOM | 248 | HB3 LEU  | 15 | 3.672 | -1.084 | 2.244 | 1.00 | 0.00 |
| ATOM | 249 | CG LEU   | 15 | 2.485 | -2.784 | 2.833 | 1.00 | 0.00 |
| ATOM | 250 | HG LEU   | 15 | 1.629 | -2.947 | 3.488 | 1.00 | 0.00 |
| ATOM | 251 | CD1 LEU  | 15 | 2.052 | -2.951 | 1.381 | 1.00 | 0.00 |
| ATOM | 252 | HD11 LEU | 15 | 2.907 | -2.789 | 0.725 | 1.00 | 0.00 |
| ATOM | 253 | HD12 LEU | 15 | 1.665 | -3.959 | 1.230 | 1.00 | 0.00 |
| ATOM | 254 | HD13 LEU | 15 | 1.273 | -2.225 | 1.147 | 1.00 | 0.00 |
| ATOM | 255 | CD2 LEU  | 15 | 3.470 | -3.848 | 3.225 | 1.00 | 0.00 |
| ATOM | 256 | HD21 LEU | 15 | 3.704 | -3.755 | 4.285 | 1.00 | 0.00 |
| ATOM | 257 | HD22 LEU | 15 | 3.039 | -4.831 | 3.034 | 1.00 | 0.00 |
| ATOM | 258 | HD23 LEU | 15 | 4.383 | -3.732 | 2.640 | 1.00 | 0.00 |
| ATOM | 259 | C LEU    | 15 | 4.017 | 0.265  | 4.757 | 1.00 | 0.00 |
| ATOM | 260 | O LEU    | 15 | 3.424 | 0.763  | 5.720 | 1.00 | 0.00 |
| ATOM | 261 | N ARG    | 16 | 4.829 | 0.955  | 3.955 | 1.00 | 0.00 |
| ATOM | 262 | H ARG    | 16 | 5.244 | 0.497  | 3.156 | 1.00 | 0.00 |
| ATOM | 263 | CA ARG   | 16 | 5.138 | 2.347  | 4.183 | 1.00 | 0.00 |
| ATOM | 264 | HA ARG   | 16 | 4.279 | 2.840  | 4.639 | 1.00 | 0.00 |
| ATOM | 265 | CB ARG   | 16 | 6.339 | 2.499  | 5.114 | 1.00 | 0.00 |
| ATOM | 266 | HB2 ARG  | 16 | 7.043 | 1.693  | 4.908 | 1.00 | 0.00 |
| ATOM | 267 | HB3 ARG  | 16 | 6.816 | 3.458  | 4.913 | 1.00 | 0.00 |
| ATOM | 268 | CG ARG   | 16 | 5.911 | 2.440  | 6.581 | 1.00 | 0.00 |

|      |     |          |    |       |       |        |      |      |
|------|-----|----------|----|-------|-------|--------|------|------|
| ATOM | 269 | HG2 ARG  | 16 | 4.840 | 2.243 | 6.624  | 1.00 | 0.00 |
| ATOM | 270 | HG3 ARG  | 16 | 6.449 | 1.627 | 7.069  | 1.00 | 0.00 |
| ATOM | 271 | CD ARG   | 16 | 6.217 | 3.757 | 7.297  | 1.00 | 0.00 |
| ATOM | 272 | HD2 ARG  | 16 | 6.185 | 4.577 | 6.580  | 1.00 | 0.00 |
| ATOM | 273 | HD3 ARG  | 16 | 5.476 | 3.928 | 8.077  | 1.00 | 0.00 |
| ATOM | 274 | NE ARG   | 16 | 7.556 | 3.722 | 7.916  | 1.00 | 0.00 |
| ATOM | 275 | HE ARG   | 16 | 8.193 | 3.024 | 7.560  | 1.00 | 0.00 |
| ATOM | 276 | CZ ARG   | 16 | 7.974 | 4.526 | 8.876  | 1.00 | 0.00 |
| ATOM | 277 | NH1 ARG  | 16 | 7.179 | 5.454 | 9.358  | 1.00 | 0.00 |
| ATOM | 278 | HH11 ARG | 16 | 6.243 | 5.552 | 8.992  | 1.00 | 0.00 |
| ATOM | 279 | HH12 ARG | 16 | 7.508 | 6.064 | 10.092 | 1.00 | 0.00 |
| ATOM | 280 | NH2 ARG  | 16 | 9.184 | 4.402 | 9.364  | 1.00 | 0.00 |
| ATOM | 281 | HH21 ARG | 16 | 9.800 | 3.687 | 9.003  | 1.00 | 0.00 |
| ATOM | 282 | HH22 ARG | 16 | 9.495 | 5.021 | 10.098 | 1.00 | 0.00 |
| ATOM | 283 | C ARG    | 16 | 5.460 | 3.001 | 2.888  | 1.00 | 0.00 |
| ATOM | 284 | O ARG    | 16 | 4.642 | 3.736 | 2.405  | 1.00 | 0.00 |
| ATOM | 285 | N ALA    | 17 | 6.596 | 2.714 | 2.290  | 1.00 | 0.00 |
| ATOM | 286 | H ALA    | 17 | 7.256 | 2.125 | 2.777  | 1.00 | 0.00 |
| ATOM | 287 | CA ALA   | 17 | 6.983 | 3.265 | 1.018  | 1.00 | 0.00 |
| ATOM | 288 | HA ALA   | 17 | 7.140 | 4.337 | 1.133  | 1.00 | 0.00 |
| ATOM | 289 | CB ALA   | 17 | 8.299 | 2.624 | 0.553  | 1.00 | 0.00 |
| ATOM | 290 | HB1 ALA  | 17 | 8.156 | 1.551 | 0.424  | 1.00 | 0.00 |

|      |     |         |    |        |        |        |      |      |
|------|-----|---------|----|--------|--------|--------|------|------|
| ATOM | 291 | HB2 ALA | 17 | 8.603  | 3.065  | -0.396 | 1.00 | 0.00 |
| ATOM | 292 | HB3 ALA | 17 | 9.073  | 2.799  | 1.300  | 1.00 | 0.00 |
| ATOM | 293 | C ALA   | 17 | 5.859  | 3.091  | -0.022 | 1.00 | 0.00 |
| ATOM | 294 | O ALA   | 17 | 5.761  | 3.834  | -0.989 | 1.00 | 0.00 |
| ATOM | 295 | N CYX   | 18 | 4.920  | 2.175  | 0.236  | 1.00 | 0.00 |
| ATOM | 296 | H CYX   | 18 | 5.021  | 1.617  | 1.072  | 1.00 | 0.00 |
| ATOM | 297 | CA CYX  | 18 | 3.823  | 1.901  | -0.630 | 1.00 | 0.00 |
| ATOM | 298 | HA CYX  | 18 | 4.110  | 2.118  | -1.659 | 1.00 | 0.00 |
| ATOM | 299 | CB CYX  | 18 | 3.402  | 0.440  | -0.541 | 1.00 | 0.00 |
| ATOM | 300 | HB2 CYX | 18 | 4.212  | -0.146 | -0.106 | 1.00 | 0.00 |
| ATOM | 301 | HB3 CYX | 18 | 2.515  | 0.354  | 0.086  | 1.00 | 0.00 |
| ATOM | 302 | SG CYX  | 18 | 3.040  | -0.355 | -2.124 | 1.00 | 0.00 |
| ATOM | 303 | C CYX   | 18 | 2.709  | 2.835  | -0.251 | 1.00 | 0.00 |
| ATOM | 304 | O CYX   | 18 | 2.153  | 3.533  | -1.081 | 1.00 | 0.00 |
| ATOM | 305 | N GLN   | 19 | 2.380  | 2.881  | 1.037  | 1.00 | 0.00 |
| ATOM | 306 | H GLN   | 19 | 2.813  | 2.232  | 1.678  | 1.00 | 0.00 |
| ATOM | 307 | CA GLN  | 19 | 1.365  | 3.761  | 1.542  | 1.00 | 0.00 |
| ATOM | 308 | HA GLN  | 19 | 0.647  | 3.998  | 0.757  | 1.00 | 0.00 |
| ATOM | 309 | CB GLN  | 19 | 0.630  | 3.088  | 2.683  | 1.00 | 0.00 |
| ATOM | 310 | HB2 GLN | 19 | -0.192 | 3.740  | 2.977  | 1.00 | 0.00 |
| ATOM | 311 | HB3 GLN | 19 | 0.229  | 2.146  | 2.308  | 1.00 | 0.00 |
| ATOM | 312 | CG GLN  | 19 | 1.519  | 2.816  | 3.890  | 1.00 | 0.00 |

|      |     |      |     |    |        |       |       |      |      |
|------|-----|------|-----|----|--------|-------|-------|------|------|
| ATOM | 313 | HG2  | GLN | 19 | 1.339  | 1.800 | 4.243 | 1.00 | 0.00 |
| ATOM | 314 | HG3  | GLN | 19 | 2.565  | 2.920 | 3.602 | 1.00 | 0.00 |
| ATOM | 315 | CD   | GLN | 19 | 1.229  | 3.785 | 5.027 | 1.00 | 0.00 |
| ATOM | 316 | OE1  | GLN | 19 | 2.115  | 4.417 | 5.602 | 1.00 | 0.00 |
| ATOM | 317 | NE2  | GLN | 19 | -0.046 | 3.906 | 5.369 | 1.00 | 0.00 |
| ATOM | 318 | HE21 | GLN | 19 | -0.308 | 4.532 | 6.116 | 1.00 | 0.00 |
| ATOM | 319 | HE22 | GLN | 19 | -0.750 | 3.371 | 4.880 | 1.00 | 0.00 |
| ATOM | 320 | C    | GLN | 19 | 1.948  | 5.088 | 1.958 | 1.00 | 0.00 |
| ATOM | 321 | O    | GLN | 19 | 1.452  | 5.702 | 2.873 | 1.00 | 0.00 |
| ATOM | 322 | N    | GLN | 20 | 3.031  | 5.529 | 1.341 | 1.00 | 0.00 |
| ATOM | 323 | H    | GLN | 20 | 3.410  | 4.961 | 0.596 | 1.00 | 0.00 |
| ATOM | 324 | CA   | GLN | 20 | 3.721  | 6.746 | 1.692 | 1.00 | 0.00 |
| ATOM | 325 | HA   | GLN | 20 | 3.075  | 7.340 | 2.338 | 1.00 | 0.00 |
| ATOM | 326 | CB   | GLN | 20 | 5.040  | 6.487 | 2.424 | 1.00 | 0.00 |
| ATOM | 327 | HB2  | GLN | 20 | 5.598  | 5.727 | 1.877 | 1.00 | 0.00 |
| ATOM | 328 | HB3  | GLN | 20 | 5.614  | 7.413 | 2.446 | 1.00 | 0.00 |
| ATOM | 329 | CG   | GLN | 20 | 4.792  | 6.005 | 3.861 | 1.00 | 0.00 |
| ATOM | 330 | HG2  | GLN | 20 | 3.830  | 5.495 | 3.922 | 1.00 | 0.00 |
| ATOM | 331 | HG3  | GLN | 20 | 5.590  | 5.306 | 4.114 | 1.00 | 0.00 |
| ATOM | 332 | CD   | GLN | 20 | 4.804  | 7.129 | 4.858 | 1.00 | 0.00 |
| ATOM | 333 | OE1  | GLN | 20 | 5.364  | 8.191 | 4.655 | 1.00 | 0.00 |
| ATOM | 334 | NE2  | GLN | 20 | 4.135  | 6.918 | 5.980 | 1.00 | 0.00 |

|      |     |      |     |    |       |       |        |      |      |
|------|-----|------|-----|----|-------|-------|--------|------|------|
| ATOM | 335 | HE21 | GLN | 20 | 4.106 | 7.636 | 6.689  | 1.00 | 0.00 |
| ATOM | 336 | HE22 | GLN | 20 | 3.657 | 6.039 | 6.121  | 1.00 | 0.00 |
| ATOM | 337 | C    | GLN | 20 | 3.985 | 7.534 | 0.435  | 1.00 | 0.00 |
| ATOM | 338 | O    | GLN | 20 | 3.802 | 8.742 | 0.411  | 1.00 | 0.00 |
| ATOM | 339 | N    | TRP | 21 | 4.361 | 6.847 | -0.644 | 1.00 | 0.00 |
| ATOM | 340 | H    | TRP | 21 | 4.527 | 5.853 | -0.574 | 1.00 | 0.00 |
| ATOM | 341 | CA   | TRP | 21 | 4.606 | 7.496 | -1.914 | 1.00 | 0.00 |
| ATOM | 342 | HA   | TRP | 21 | 5.369 | 8.265 | -1.796 | 1.00 | 0.00 |
| ATOM | 343 | CB   | TRP | 21 | 5.093 | 6.480 | -2.946 | 1.00 | 0.00 |
| ATOM | 344 | HB2  | TRP | 21 | 5.595 | 6.993 | -3.766 | 1.00 | 0.00 |
| ATOM | 345 | HB3  | TRP | 21 | 5.796 | 5.807 | -2.455 | 1.00 | 0.00 |
| ATOM | 346 | CG   | TRP | 21 | 4.038 | 5.621 | -3.562 | 1.00 | 0.00 |
| ATOM | 347 | CD1  | TRP | 21 | 3.693 | 4.352 | -3.254 | 1.00 | 0.00 |
| ATOM | 348 | HD1  | TRP | 21 | 4.280 | 3.896 | -2.457 | 1.00 | 0.00 |
| ATOM | 349 | NE1  | TRP | 21 | 2.647 | 3.895 | -4.034 | 1.00 | 0.00 |
| ATOM | 350 | HE1  | TRP | 21 | 2.208 | 2.988 | -3.957 | 1.00 | 0.00 |
| ATOM | 351 | CE2  | TRP | 21 | 2.279 | 4.886 | -4.909 | 1.00 | 0.00 |
| ATOM | 352 | CZ2  | TRP | 21 | 1.292 | 4.961 | -5.890 | 1.00 | 0.00 |
| ATOM | 353 | HZ2  | TRP | 21 | 0.670 | 4.080 | -6.052 | 1.00 | 0.00 |
| ATOM | 354 | CH2  | TRP | 21 | 1.159 | 6.151 | -6.603 | 1.00 | 0.00 |
| ATOM | 355 | HH2  | TRP | 21 | 0.416 | 6.236 | -7.396 | 1.00 | 0.00 |
| ATOM | 356 | CZ3  | TRP | 21 | 1.975 | 7.255 | -6.314 | 1.00 | 0.00 |

|      |     |          |    |        |       |        |      |      |
|------|-----|----------|----|--------|-------|--------|------|------|
| ATOM | 357 | HZ3 TRP  | 21 | 1.829  | 8.196 | -6.844 | 1.00 | 0.00 |
| ATOM | 358 | CE3 TRP  | 21 | 2.989  | 7.193 | -5.353 | 1.00 | 0.00 |
| ATOM | 359 | HE3 TRP  | 21 | 3.620  | 8.068 | -5.201 | 1.00 | 0.00 |
| ATOM | 360 | CD2 TRP  | 21 | 3.143  | 5.999 | -4.620 | 1.00 | 0.00 |
| ATOM | 361 | C TRP    | 21 | 3.331  | 8.190 | -2.361 | 1.00 | 0.00 |
| ATOM | 362 | O TRP    | 21 | 3.348  | 9.260 | -2.958 | 1.00 | 0.00 |
| ATOM | 363 | N ILE    | 22 | 2.180  | 7.590 | -2.034 | 1.00 | 0.00 |
| ATOM | 364 | H ILE    | 22 | 2.206  | 6.706 | -1.546 | 1.00 | 0.00 |
| ATOM | 365 | CA ILE   | 22 | 0.891  | 8.130 | -2.405 | 1.00 | 0.00 |
| ATOM | 366 | HA ILE   | 22 | 0.878  | 8.459 | -3.444 | 1.00 | 0.00 |
| ATOM | 367 | CB ILE   | 22 | -0.204 | 7.078 | -2.189 | 1.00 | 0.00 |
| ATOM | 368 | HB ILE   | 22 | -0.258 | 6.830 | -1.129 | 1.00 | 0.00 |
| ATOM | 369 | CG2 ILE  | 22 | -1.558 | 7.622 | -2.655 | 1.00 | 0.00 |
| ATOM | 370 | HG21 ILE | 22 | -1.505 | 7.869 | -3.715 | 1.00 | 0.00 |
| ATOM | 371 | HG22 ILE | 22 | -2.328 | 6.866 | -2.497 | 1.00 | 0.00 |
| ATOM | 372 | HG23 ILE | 22 | -1.806 | 8.517 | -2.085 | 1.00 | 0.00 |
| ATOM | 373 | CG1 ILE  | 22 | 0.142  | 5.777 | -2.920 | 1.00 | 0.00 |
| ATOM | 374 | HG12 ILE | 22 | -0.123 | 5.889 | -3.972 | 1.00 | 0.00 |
| ATOM | 375 | HG13 ILE | 22 | 1.215  | 5.605 | -2.832 | 1.00 | 0.00 |
| ATOM | 376 | CD1 ILE  | 22 | -0.613 | 4.590 | -2.330 | 1.00 | 0.00 |
| ATOM | 377 | HD11 ILE | 22 | -1.686 | 4.761 | -2.418 | 1.00 | 0.00 |
| ATOM | 378 | HD12 ILE | 22 | -0.345 | 3.682 | -2.872 | 1.00 | 0.00 |

|      |     |      |     |    |        |        |        |      |      |
|------|-----|------|-----|----|--------|--------|--------|------|------|
| ATOM | 379 | HD13 | ILE | 22 | -0.349 | 4.476  | -1.279 | 1.00 | 0.00 |
| ATOM | 380 | C    | ILE | 22 | 0.644  | 9.381  | -1.586 | 1.00 | 0.00 |
| ATOM | 381 | O    | ILE | 22 | 0.006  | 10.319 | -2.040 | 1.00 | 0.00 |
| ATOM | 382 | N    | ARG | 23 | 1.166  | 9.419  | -0.354 | 1.00 | 0.00 |
| ATOM | 383 | H    | ARG | 23 | 1.625  | 8.595  | 0.009  | 1.00 | 0.00 |
| ATOM | 384 | CA   | ARG | 23 | 1.066  | 10.580 | 0.500  | 1.00 | 0.00 |
| ATOM | 385 | HA   | ARG | 23 | 0.028  | 10.910 | 0.544  | 1.00 | 0.00 |
| ATOM | 386 | CB   | ARG | 23 | 1.536  | 10.265 | 1.913  | 1.00 | 0.00 |
| ATOM | 387 | HB2  | ARG | 23 | 2.313  | 9.502  | 1.864  | 1.00 | 0.00 |
| ATOM | 388 | HB3  | ARG | 23 | 1.945  | 11.171 | 2.358  | 1.00 | 0.00 |
| ATOM | 389 | CG   | ARG | 23 | 0.379  | 9.757  | 2.767  | 1.00 | 0.00 |
| ATOM | 390 | HG2  | ARG | 23 | 0.531  | 10.082 | 3.796  | 1.00 | 0.00 |
| ATOM | 391 | HG3  | ARG | 23 | -0.551 | 10.179 | 2.387  | 1.00 | 0.00 |
| ATOM | 392 | CD   | ARG | 23 | 0.302  | 8.236  | 2.722  | 1.00 | 0.00 |
| ATOM | 393 | HD2  | ARG | 23 | -0.620 | 7.921  | 2.233  | 1.00 | 0.00 |
| ATOM | 394 | HD3  | ARG | 23 | 1.156  | 7.833  | 2.178  | 1.00 | 0.00 |
| ATOM | 395 | NE   | ARG | 23 | 0.318  | 7.691  | 4.107  | 1.00 | 0.00 |
| ATOM | 396 | HE   | ARG | 23 | -0.466 | 7.101  | 4.348  | 1.00 | 0.00 |
| ATOM | 397 | CZ   | ARG | 23 | 1.276  | 7.845  | 4.985  | 1.00 | 0.00 |
| ATOM | 398 | NH1  | ARG | 23 | 2.303  | 8.598  | 4.683  | 1.00 | 0.00 |
| ATOM | 399 | HH11 | ARG | 23 | 2.346  | 9.050  | 3.781  | 1.00 | 0.00 |
| ATOM | 400 | HH12 | ARG | 23 | 3.048  | 8.723  | 5.353  | 1.00 | 0.00 |



|      |     |      |     |    |       |        |        |      |      |
|------|-----|------|-----|----|-------|--------|--------|------|------|
| ATOM | 401 | NH2  | ARG | 23 | 1.175 | 7.325  | 6.182  | 1.00 | 0.00 |
| ATOM | 402 | HH21 | ARG | 23 | 0.350 | 6.799  | 6.433  | 1.00 | 0.00 |
| ATOM | 403 | HH22 | ARG | 23 | 1.922 | 7.452  | 6.849  | 1.00 | 0.00 |
| ATOM | 404 | C    | ARG | 23 | 1.881 | 11.750 | -0.046 | 1.00 | 0.00 |
| ATOM | 405 | O    | ARG | 23 | 1.667 | 12.897 | 0.347  | 1.00 | 0.00 |
| ATOM | 406 | N    | GLN | 24 | 2.816 | 11.459 | -0.944 | 1.00 | 0.00 |
| ATOM | 407 | H    | GLN | 24 | 3.003 | 10.493 | -1.173 | 1.00 | 0.00 |
| ATOM | 408 | CA   | GLN | 24 | 3.622 | 12.476 | -1.566 | 1.00 | 0.00 |
| ATOM | 409 | HA   | GLN | 24 | 3.839 | 13.269 | -0.850 | 1.00 | 0.00 |
| ATOM | 410 | CB   | GLN | 24 | 4.942 | 11.879 | -2.047 | 1.00 | 0.00 |
| ATOM | 411 | HB2  | GLN | 24 | 4.816 | 10.805 | -2.184 | 1.00 | 0.00 |
| ATOM | 412 | HB3  | GLN | 24 | 5.212 | 12.337 | -2.999 | 1.00 | 0.00 |
| ATOM | 413 | CG   | GLN | 24 | 6.051 | 12.135 | -1.026 | 1.00 | 0.00 |
| ATOM | 414 | HG2  | GLN | 24 | 6.768 | 12.840 | -1.446 | 1.00 | 0.00 |
| ATOM | 415 | HG3  | GLN | 24 | 5.606 | 12.562 | -0.128 | 1.00 | 0.00 |
| ATOM | 416 | CD   | GLN | 24 | 6.785 | 10.866 | -0.646 | 1.00 | 0.00 |
| ATOM | 417 | OE1  | GLN | 24 | 6.810 | 9.897  | -1.377 | 1.00 | 0.00 |
| ATOM | 418 | NE2  | GLN | 24 | 7.401 | 10.868 | 0.515  | 1.00 | 0.00 |
| ATOM | 419 | HE21 | GLN | 24 | 7.906 | 10.047 | 0.817  | 1.00 | 0.00 |
| ATOM | 420 | HE22 | GLN | 24 | 7.367 | 11.690 | 1.100  | 1.00 | 0.00 |
| ATOM | 421 | C    | GLN | 24 | 2.886 | 13.134 | -2.720 | 1.00 | 0.00 |
| ATOM | 422 | O    | GLN | 24 | 3.315 | 14.163 | -3.229 | 1.00 | 0.00 |

|      |     |      |     |    |        |        |        |      |      |
|------|-----|------|-----|----|--------|--------|--------|------|------|
| ATOM | 423 | N    | GLN | 25 | 1.774  | 12.516 | -3.146 | 1.00 | 0.00 |
| ATOM | 424 | H    | GLN | 25 | 1.515  | 11.622 | -2.754 | 1.00 | 0.00 |
| ATOM | 425 | CA   | GLN | 25 | 0.964  | 13.057 | -4.210 | 1.00 | 0.00 |
| ATOM | 426 | HA   | GLN | 25 | 1.601  | 13.385 | -5.031 | 1.00 | 0.00 |
| ATOM | 427 | CB   | GLN | 25 | -0.003 | 11.992 | -4.736 | 1.00 | 0.00 |
| ATOM | 428 | HB2  | GLN | 25 | 0.090  | 11.094 | -4.126 | 1.00 | 0.00 |
| ATOM | 429 | HB3  | GLN | 25 | -1.022 | 12.372 | -4.669 | 1.00 | 0.00 |
| ATOM | 430 | CG   | GLN | 25 | 0.319  | 11.654 | -6.191 | 1.00 | 0.00 |
| ATOM | 431 | HG2  | GLN | 25 | 1.400  | 11.519 | -6.213 | 1.00 | 0.00 |
| ATOM | 432 | HG3  | GLN | 25 | -0.167 | 10.739 | -6.531 | 1.00 | 0.00 |
| ATOM | 433 | CD   | GLN | 25 | -0.049 | 12.781 | -7.140 | 1.00 | 0.00 |
| ATOM | 434 | OE1  | GLN | 25 | -0.541 | 13.823 | -6.787 | 1.00 | 0.00 |
| ATOM | 435 | NE2  | GLN | 25 | 0.101  | 12.535 | -8.424 | 1.00 | 0.00 |
| ATOM | 436 | HE21 | GLN | 25 | -0.128 | 13.248 | -9.102 | 1.00 | 0.00 |
| ATOM | 437 | HE22 | GLN | 25 | 0.445  | 11.634 | -8.726 | 1.00 | 0.00 |
| ATOM | 438 | C    | GLN | 25 | 0.212  | 14.299 | -3.736 | 1.00 | 0.00 |
| ATOM | 439 | O    | GLN | 25 | -0.401 | 15.030 | -4.502 | 1.00 | 0.00 |
| ATOM | 440 | N    | LEU | 26 | 0.223  | 14.549 | -2.430 | 1.00 | 0.00 |
| ATOM | 441 | H    | LEU | 26 | 0.646  | 13.873 | -1.810 | 1.00 | 0.00 |
| ATOM | 442 | CA   | LEU | 26 | -0.452 | 15.677 | -1.850 | 1.00 | 0.00 |
| ATOM | 443 | HA   | LEU | 26 | -0.970 | 16.236 | -2.629 | 1.00 | 0.00 |
| ATOM | 444 | CB   | LEU | 26 | -1.483 | 15.215 | -0.809 | 1.00 | 0.00 |

|      |     |          |    |        |        |        |      |      |
|------|-----|----------|----|--------|--------|--------|------|------|
| ATOM | 445 | HB2 LEU  | 26 | -0.968 | 15.315 | 0.146  | 1.00 | 0.00 |
| ATOM | 446 | HB3 LEU  | 26 | -2.333 | 15.896 | -0.837 | 1.00 | 0.00 |
| ATOM | 447 | CG LEU   | 26 | -1.979 | 13.771 | -0.973 | 1.00 | 0.00 |
| ATOM | 448 | HG LEU   | 26 | -1.864 | 13.471 | -2.015 | 1.00 | 0.00 |
| ATOM | 449 | CD1 LEU  | 26 | -1.179 | 12.833 | -0.086 | 1.00 | 0.00 |
| ATOM | 450 | HD11 LEU | 26 | -1.294 | 13.131 | 0.956  | 1.00 | 0.00 |
| ATOM | 451 | HD12 LEU | 26 | -1.543 | 11.813 | -0.214 | 1.00 | 0.00 |
| ATOM | 452 | HD13 LEU | 26 | -0.126 | 12.880 | -0.363 | 1.00 | 0.00 |
| ATOM | 453 | CD2 LEU  | 26 | -3.469 | 13.670 | -0.651 | 1.00 | 0.00 |
| ATOM | 454 | HD21 LEU | 26 | -4.032 | 14.313 | -1.327 | 1.00 | 0.00 |
| ATOM | 455 | HD22 LEU | 26 | -3.799 | 12.638 | -0.774 | 1.00 | 0.00 |
| ATOM | 456 | HD23 LEU | 26 | -3.641 | 13.986 | 0.378  | 1.00 | 0.00 |
| ATOM | 457 | C LEU    | 26 | 0.581  | 16.647 | -1.303 | 1.00 | 0.00 |
| ATOM | 458 | O LEU    | 26 | 1.775  | 16.523 | -1.546 | 1.00 | 0.00 |
| ATOM | 459 | N ALA    | 27 | 0.108  | 17.612 | -0.517 | 1.00 | 0.00 |
| ATOM | 460 | H ALA    | 27 | -0.890 | 17.711 | -0.394 | 1.00 | 0.00 |
| ATOM | 461 | CA ALA   | 27 | 0.979  | 18.588 | 0.110  | 1.00 | 0.00 |
| ATOM | 462 | HA ALA   | 27 | 1.875  | 18.739 | -0.492 | 1.00 | 0.00 |
| ATOM | 463 | CB ALA   | 27 | 0.232  | 19.912 | 0.212  | 1.00 | 0.00 |
| ATOM | 464 | HB1 ALA  | 27 | -0.663 | 19.779 | 0.819  | 1.00 | 0.00 |
| ATOM | 465 | HB2 ALA  | 27 | 0.877  | 20.659 | 0.675  | 1.00 | 0.00 |
| ATOM | 466 | HB3 ALA  | 27 | -0.053 | 20.247 | -0.786 | 1.00 | 0.00 |

|      |     |     |     |    |       |        |        |      |      |
|------|-----|-----|-----|----|-------|--------|--------|------|------|
| ATOM | 467 | C   | ALA | 27 | 1.455 | 18.074 | 1.466  | 1.00 | 0.00 |
| ATOM | 468 | O   | ALA | 27 | 1.894 | 18.841 | 2.318  | 1.00 | 0.00 |
| ATOM | 469 | N   | GLY | 28 | 1.311 | 16.761 | 1.699  | 1.00 | 0.00 |
| ATOM | 470 | H   | GLY | 28 | 0.884 | 16.184 | 0.988  | 1.00 | 0.00 |
| ATOM | 471 | CA  | GLY | 28 | 1.740 | 16.131 | 2.926  | 1.00 | 0.00 |
| ATOM | 472 | HA2 | GLY | 28 | 1.532 | 16.802 | 3.759  | 1.00 | 0.00 |
| ATOM | 473 | HA3 | GLY | 28 | 1.184 | 15.203 | 3.060  | 1.00 | 0.00 |
| ATOM | 474 | C   | GLY | 28 | 3.228 | 15.818 | 2.902  | 1.00 | 0.00 |
| ATOM | 475 | O   | GLY | 28 | 3.706 | 15.054 | 3.735  | 1.00 | 0.00 |
| ATOM | 476 | N   | SER | 29 | 3.948 | 16.363 | 1.921  | 1.00 | 0.00 |
| ATOM | 477 | H   | SER | 29 | 3.474 | 16.906 | 1.214  | 1.00 | 0.00 |
| ATOM | 478 | CA  | SER | 29 | 5.370 | 16.163 | 1.790  | 1.00 | 0.00 |
| ATOM | 479 | HA  | SER | 29 | 5.822 | 16.027 | 2.772  | 1.00 | 0.00 |
| ATOM | 480 | CB  | SER | 29 | 5.643 | 14.917 | 0.951  | 1.00 | 0.00 |
| ATOM | 481 | HB2 | SER | 29 | 5.393 | 14.050 | 1.563  | 1.00 | 0.00 |
| ATOM | 482 | HB3 | SER | 29 | 4.980 | 14.954 | 0.087  | 1.00 | 0.00 |
| ATOM | 483 | OG  | SER | 29 | 6.983 | 14.813 | 0.512  | 1.00 | 0.00 |
| ATOM | 484 | HG  | SER | 29 | 7.088 | 14.012 | -0.008 | 1.00 | 0.00 |
| ATOM | 485 | C   | SER | 29 | 6.042 | 17.370 | 1.179  | 1.00 | 0.00 |
| ATOM | 486 | O   | SER | 29 | 5.396 | 18.100 | 0.456  | 1.00 | 0.00 |
| ATOM | 487 | N   | PRO | 30 | 7.301 | 17.614 | 1.545  | 1.00 | 0.00 |
| ATOM | 488 | CD  | PRO | 30 | 8.084 | 16.803 | 2.461  | 1.00 | 0.00 |

|      |     |         |    |        |        |        |      |      |
|------|-----|---------|----|--------|--------|--------|------|------|
| ATOM | 489 | HD2 PRO | 30 | 8.254  | 15.834 | 1.991  | 1.00 | 0.00 |
| ATOM | 490 | HD3 PRO | 30 | 7.501  | 16.667 | 3.372  | 1.00 | 0.00 |
| ATOM | 491 | CG PRO  | 30 | 9.379  | 17.569 | 2.708  | 1.00 | 0.00 |
| ATOM | 492 | HG2 PRO | 30 | 10.218 | 16.977 | 2.341  | 1.00 | 0.00 |
| ATOM | 493 | HG3 PRO | 30 | 9.494  | 17.737 | 3.779  | 1.00 | 0.00 |
| ATOM | 494 | CB PRO  | 30 | 9.260  | 18.897 | 1.956  | 1.00 | 0.00 |
| ATOM | 495 | HB2 PRO | 30 | 10.162 | 19.115 | 1.384  | 1.00 | 0.00 |
| ATOM | 496 | HB3 PRO | 30 | 9.059  | 19.718 | 2.644  | 1.00 | 0.00 |
| ATOM | 497 | CA PRO  | 30 | 8.078  | 18.710 | 1.010  | 1.00 | 0.00 |
| ATOM | 498 | HA PRO  | 30 | 7.467  | 19.611 | 1.059  | 1.00 | 0.00 |
| ATOM | 499 | C PRO   | 30 | 8.506  | 18.470 | -0.417 | 1.00 | 0.00 |
| ATOM | 500 | O PRO   | 30 | 8.180  | 17.439 | -0.994 | 1.00 | 0.00 |
| ATOM | 501 | N PHE   | 31 | 9.275  | 19.414 | -0.971 | 1.00 | 0.00 |
| ATOM | 502 | H PHE   | 31 | 9.546  | 20.221 | -0.428 | 1.00 | 0.00 |
| ATOM | 503 | CA PHE  | 31 | 9.746  | 19.316 | -2.334 | 1.00 | 0.00 |
| ATOM | 504 | HA PHE  | 31 | 10.001 | 18.287 | -2.588 | 1.00 | 0.00 |
| ATOM | 505 | CB PHE  | 31 | 8.616  | 19.782 | -3.257 | 1.00 | 0.00 |
| ATOM | 506 | HB2 PHE | 31 | 8.548  | 20.868 | -3.315 | 1.00 | 0.00 |
| ATOM | 507 | HB3 PHE | 31 | 8.842  | 19.380 | -4.245 | 1.00 | 0.00 |
| ATOM | 508 | CG PHE  | 31 | 7.233  | 19.280 | -2.891 | 1.00 | 0.00 |
| ATOM | 509 | CD1 PHE | 31 | 6.826  | 17.991 | -3.270 | 1.00 | 0.00 |
| ATOM | 510 | HD1 PHE | 31 | 7.488  | 17.373 | -3.878 | 1.00 | 0.00 |

|      |     |     |     |    |        |        |        |      |      |
|------|-----|-----|-----|----|--------|--------|--------|------|------|
| ATOM | 511 | CE1 | PHE | 31 | 5.575  | 17.496 | -2.871 | 1.00 | 0.00 |
| ATOM | 512 | HE1 | PHE | 31 | 5.283  | 16.478 | -3.130 | 1.00 | 0.00 |
| ATOM | 513 | CZ  | PHE | 31 | 4.702  | 18.310 | -2.140 | 1.00 | 0.00 |
| ATOM | 514 | HZ  | PHE | 31 | 3.710  | 17.947 | -1.869 | 1.00 | 0.00 |
| ATOM | 515 | CE2 | PHE | 31 | 5.108  | 19.599 | -1.755 | 1.00 | 0.00 |
| ATOM | 516 | HE2 | PHE | 31 | 4.427  | 20.232 | -1.186 | 1.00 | 0.00 |
| ATOM | 517 | CD2 | PHE | 31 | 6.382  | 20.072 | -2.100 | 1.00 | 0.00 |
| ATOM | 518 | HD2 | PHE | 31 | 6.711  | 21.052 | -1.755 | 1.00 | 0.00 |
| ATOM | 519 | C   | PHE | 31 | 10.964 | 20.196 | -2.554 | 1.00 | 0.00 |
| ATOM | 520 | O   | PHE | 31 | 11.098 | 21.240 | -1.912 | 1.00 | 0.00 |
| ATOM | 521 | N   | SER | 32 | 11.844 | 19.769 | -3.457 | 1.00 | 0.00 |
| ATOM | 522 | H   | SER | 32 | 11.704 | 18.879 | -3.915 | 1.00 | 0.00 |
| ATOM | 523 | CA  | SER | 32 | 13.042 | 20.524 | -3.773 | 1.00 | 0.00 |
| ATOM | 524 | HA  | SER | 32 | 12.943 | 21.545 | -3.406 | 1.00 | 0.00 |
| ATOM | 525 | CB  | SER | 32 | 14.271 | 19.881 | -3.112 | 1.00 | 0.00 |
| ATOM | 526 | HB2 | SER | 32 | 13.958 | 18.950 | -2.639 | 1.00 | 0.00 |
| ATOM | 527 | HB3 | SER | 32 | 15.004 | 19.664 | -3.889 | 1.00 | 0.00 |
| ATOM | 528 | OG  | SER | 32 | 14.851 | 20.731 | -2.142 | 1.00 | 0.00 |
| ATOM | 529 | HG  | SER | 32 | 15.613 | 20.297 | -1.752 | 1.00 | 0.00 |
| ATOM | 530 | C   | SER | 32 | 13.223 | 20.604 | -5.281 | 1.00 | 0.00 |
| ATOM | 531 | O   | SER | 32 | 12.864 | 21.601 | -5.907 | 1.00 | 0.00 |
| ATOM | 532 | N   | GLU | 33 | 13.776 | 19.536 | -5.865 | 1.00 | 0.00 |

|      |     |     |     |    |        |        |         |      |      |
|------|-----|-----|-----|----|--------|--------|---------|------|------|
| ATOM | 533 | H   | GLU | 33 | 14.104 | 18.770 | -5.295  | 1.00 | 0.00 |
| ATOM | 534 | CA  | GLU | 33 | 14.009 | 19.478 | -7.287  | 1.00 | 0.00 |
| ATOM | 535 | HA  | GLU | 33 | 14.204 | 20.480 | -7.669  | 1.00 | 0.00 |
| ATOM | 536 | CB  | GLU | 33 | 15.219 | 18.589 | -7.601  | 1.00 | 0.00 |
| ATOM | 537 | HB2 | GLU | 33 | 15.490 | 18.042 | -6.698  | 1.00 | 0.00 |
| ATOM | 538 | HB3 | GLU | 33 | 14.936 | 17.883 | -8.382  | 1.00 | 0.00 |
| ATOM | 539 | CG  | GLU | 33 | 16.411 | 19.416 | -8.071  | 1.00 | 0.00 |
| ATOM | 540 | HG2 | GLU | 33 | 16.530 | 19.276 | -9.146  | 1.00 | 0.00 |
| ATOM | 541 | HG3 | GLU | 33 | 16.217 | 20.467 | -7.861  | 1.00 | 0.00 |
| ATOM | 542 | CD  | GLU | 33 | 17.689 | 18.982 | -7.357  | 1.00 | 0.00 |
| ATOM | 543 | OE1 | GLU | 33 | 18.070 | 17.802 | -7.534  | 1.00 | 0.00 |
| ATOM | 544 | OE2 | GLU | 33 | 18.260 | 19.835 | -6.645  | 1.00 | 0.00 |
| ATOM | 545 | C   | GLU | 33 | 12.753 | 19.007 | -8.010  | 1.00 | 0.00 |
| ATOM | 546 | O   | GLU | 33 | 11.670 | 18.913 | -7.425  | 1.00 | 0.00 |
| ATOM | 547 | N   | ASN | 34 | 12.905 | 18.682 | -9.299  | 1.00 | 0.00 |
| ATOM | 548 | H   | ASN | 34 | 13.803 | 18.807 | -9.743  | 1.00 | 0.00 |
| ATOM | 549 | CA  | ASN | 34 | 11.822 | 18.163 | -10.087 | 1.00 | 0.00 |
| ATOM | 550 | HA  | ASN | 34 | 10.872 | 18.556 | -9.725  | 1.00 | 0.00 |
| ATOM | 551 | CB  | ASN | 34 | 11.998 | 18.578 | -11.546 | 1.00 | 0.00 |
| ATOM | 552 | HB2 | ASN | 34 | 13.065 | 18.604 | -11.769 | 1.00 | 0.00 |
| ATOM | 553 | HB3 | ASN | 34 | 11.507 | 17.861 | -12.204 | 1.00 | 0.00 |
| ATOM | 554 | CG  | ASN | 34 | 11.416 | 19.950 | -11.806 | 1.00 | 0.00 |

|      |     |      |     |    |        |        |         |      |      |
|------|-----|------|-----|----|--------|--------|---------|------|------|
| ATOM | 555 | OD1  | ASN | 34 | 10.348 | 20.305 | -11.336 | 1.00 | 0.00 |
| ATOM | 556 | ND2  | ASN | 34 | 12.132 | 20.726 | -12.596 | 1.00 | 0.00 |
| ATOM | 557 | HD21 | ASN | 34 | 11.806 | 21.656 | -12.815 | 1.00 | 0.00 |
| ATOM | 558 | HD22 | ASN | 34 | 13.003 | 20.386 | -12.979 | 1.00 | 0.00 |
| ATOM | 559 | C    | ASN | 34 | 11.779 | 16.653 | -10.006 | 1.00 | 0.00 |
| ATOM | 560 | O    | ASN | 34 | 12.825 | 16.007 | -9.949  | 1.00 | 0.00 |
| ATOM | 561 | N    | GLN | 35 | 10.579 | 16.089 | -10.098 | 1.00 | 0.00 |
| ATOM | 562 | H    | GLN | 35 | 9.761  | 16.680 | -10.140 | 1.00 | 0.00 |
| ATOM | 563 | CA   | GLN | 35 | 10.389 | 14.661 | -10.080 | 1.00 | 0.00 |
| ATOM | 564 | HA   | GLN | 35 | 10.891 | 14.215 | -10.939 | 1.00 | 0.00 |
| ATOM | 565 | CB   | GLN | 35 | 10.967 | 14.049 | -8.804  | 1.00 | 0.00 |
| ATOM | 566 | HB2  | GLN | 35 | 11.747 | 14.710 | -8.428  | 1.00 | 0.00 |
| ATOM | 567 | HB3  | GLN | 35 | 10.168 | 13.974 | -8.066  | 1.00 | 0.00 |
| ATOM | 568 | CG   | GLN | 35 | 11.554 | 12.665 | -9.060  | 1.00 | 0.00 |
| ATOM | 569 | HG2  | GLN | 35 | 11.789 | 12.182 | -8.111  | 1.00 | 0.00 |
| ATOM | 570 | HG3  | GLN | 35 | 10.816 | 12.069 | -9.597  | 1.00 | 0.00 |
| ATOM | 571 | CD   | GLN | 35 | 12.822 | 12.737 | -9.896  | 1.00 | 0.00 |
| ATOM | 572 | OE1  | GLN | 35 | 13.864 | 13.197 | -9.473  | 1.00 | 0.00 |
| ATOM | 573 | NE2  | GLN | 35 | 12.716 | 12.246 | -11.120 | 1.00 | 0.00 |
| ATOM | 574 | HE21 | GLN | 35 | 13.516 | 12.258 | -11.737 | 1.00 | 0.00 |
| ATOM | 575 | HE22 | GLN | 35 | 11.836 | 11.861 | -11.432 | 1.00 | 0.00 |
| ATOM | 576 | C    | GLN | 35 | 8.922  | 14.341 | -10.213 | 1.00 | 0.00 |



|      |     |     |     |    |       |        |         |      |      |
|------|-----|-----|-----|----|-------|--------|---------|------|------|
| ATOM | 577 | O   | GLN | 35 | 8.078 | 15.194 | -9.934  | 1.00 | 0.00 |
| ATOM | 578 | N   | TRP | 36 | 8.626 | 13.084 | -10.592 | 1.00 | 0.00 |
| ATOM | 579 | H   | TRP | 36 | 9.368 | 12.443 | -10.835 | 1.00 | 0.00 |
| ATOM | 580 | CA  | TRP | 36 | 7.251 | 12.629 | -10.726 | 1.00 | 0.00 |
| ATOM | 581 | HA  | TRP | 36 | 6.795 | 13.087 | -11.604 | 1.00 | 0.00 |
| ATOM | 582 | CB  | TRP | 36 | 7.200 | 11.106 | -10.887 | 1.00 | 0.00 |
| ATOM | 583 | HB2 | TRP | 36 | 7.484 | 10.821 | -11.900 | 1.00 | 0.00 |
| ATOM | 584 | HB3 | TRP | 36 | 7.891 | 10.654 | -10.176 | 1.00 | 0.00 |
| ATOM | 585 | CG  | TRP | 36 | 5.853 | 10.490 | -10.628 | 1.00 | 0.00 |
| ATOM | 586 | CD1 | TRP | 36 | 5.171 | 10.410 | -9.452  | 1.00 | 0.00 |
| ATOM | 587 | HD1 | TRP | 36 | 5.678 | 10.839 | -8.588  | 1.00 | 0.00 |
| ATOM | 588 | NE1 | TRP | 36 | 3.947 | 9.783  | -9.613  | 1.00 | 0.00 |
| ATOM | 589 | HE1 | TRP | 36 | 3.280 | 9.598  | -8.878  | 1.00 | 0.00 |
| ATOM | 590 | CE2 | TRP | 36 | 3.796 | 9.433  | -10.934 | 1.00 | 0.00 |
| ATOM | 591 | CZ2 | TRP | 36 | 2.768 | 8.778  | -11.613 | 1.00 | 0.00 |
| ATOM | 592 | HZ2 | TRP | 36 | 1.888 | 8.475  | -11.046 | 1.00 | 0.00 |
| ATOM | 593 | CH2 | TRP | 36 | 2.932 | 8.550  | -12.988 | 1.00 | 0.00 |
| ATOM | 594 | HH2 | TRP | 36 | 2.153 | 8.042  | -13.557 | 1.00 | 0.00 |
| ATOM | 595 | CZ3 | TRP | 36 | 4.098 | 8.971  | -13.653 | 1.00 | 0.00 |
| ATOM | 596 | HZ3 | TRP | 36 | 4.214 | 8.788  | -14.722 | 1.00 | 0.00 |
| ATOM | 597 | CE3 | TRP | 36 | 5.137 | 9.629  | -12.982 | 1.00 | 0.00 |
| ATOM | 598 | HE3 | TRP | 36 | 6.021 | 9.922  | -13.548 | 1.00 | 0.00 |

|      |     |         |    |       |        |         |      |      |
|------|-----|---------|----|-------|--------|---------|------|------|
| ATOM | 599 | CD2 TRP | 36 | 4.996 | 9.869  | -11.601 | 1.00 | 0.00 |
| ATOM | 600 | C TRP   | 36 | 6.448 | 13.091 | -9.502  | 1.00 | 0.00 |
| ATOM | 601 | O TRP   | 36 | 5.253 | 13.340 | -9.594  | 1.00 | 0.00 |
| ATOM | 602 | N GLY   | 37 | 7.126 | 13.189 | -8.346  | 1.00 | 0.00 |
| ATOM | 603 | H GLY   | 37 | 8.090 | 12.889 | -8.311  | 1.00 | 0.00 |
| ATOM | 604 | CA GLY  | 37 | 6.530 | 13.707 | -7.146  | 1.00 | 0.00 |
| ATOM | 605 | HA2 GLY | 37 | 6.086 | 14.679 | -7.358  | 1.00 | 0.00 |
| ATOM | 606 | HA3 GLY | 37 | 5.754 | 13.020 | -6.807  | 1.00 | 0.00 |
| ATOM | 607 | C GLY   | 37 | 7.563 | 13.865 | -6.048  | 1.00 | 0.00 |
| ATOM | 608 | O GLY   | 37 | 8.105 | 14.950 | -5.852  | 1.00 | 0.00 |
| ATOM | 609 | N PRO   | 38 | 7.862 | 12.756 | -5.354  | 1.00 | 0.00 |
| ATOM | 610 | CD PRO  | 38 | 7.276 | 11.435 | -5.548  | 1.00 | 0.00 |
| ATOM | 611 | HD2 PRO | 38 | 7.618 | 11.055 | -6.511  | 1.00 | 0.00 |
| ATOM | 612 | HD3 PRO | 38 | 6.192 | 11.549 | -5.567  | 1.00 | 0.00 |
| ATOM | 613 | CG PRO  | 38 | 7.751 | 10.577 | -4.377  | 1.00 | 0.00 |
| ATOM | 614 | HG2 PRO | 38 | 8.361 | 9.758  | -4.758  | 1.00 | 0.00 |
| ATOM | 615 | HG3 PRO | 38 | 6.884 | 10.171 | -3.855  | 1.00 | 0.00 |
| ATOM | 616 | CB PRO  | 38 | 8.558 | 11.495 | -3.462  | 1.00 | 0.00 |
| ATOM | 617 | HB2 PRO | 38 | 9.499 | 11.027 | -3.172  | 1.00 | 0.00 |
| ATOM | 618 | HB3 PRO | 38 | 7.991 | 11.754 | -2.568  | 1.00 | 0.00 |
| ATOM | 619 | CA PRO  | 38 | 8.834 | 12.744 | -4.282  | 1.00 | 0.00 |
| ATOM | 620 | HA PRO  | 38 | 8.643 | 13.597 | -3.631  | 1.00 | 0.00 |

|      |     |      |     |    |        |        |        |      |      |
|------|-----|------|-----|----|--------|--------|--------|------|------|
| ATOM | 621 | C    | PRO | 38 | 10.242 | 12.826 | -4.817 | 1.00 | 0.00 |
| ATOM | 622 | O    | PRO | 38 | 10.955 | 11.838 | -4.865 | 1.00 | 0.00 |
| ATOM | 623 | N    | GLN | 39 | 10.667 | 14.015 | -5.234 | 1.00 | 0.00 |
| ATOM | 624 | H    | GLN | 39 | 10.038 | 14.804 | -5.218 | 1.00 | 0.00 |
| ATOM | 625 | CA   | GLN | 39 | 11.994 | 14.208 | -5.771 | 1.00 | 0.00 |
| ATOM | 626 | HA   | GLN | 39 | 12.151 | 13.547 | -6.624 | 1.00 | 0.00 |
| ATOM | 627 | CB   | GLN | 39 | 12.168 | 15.659 | -6.237 | 1.00 | 0.00 |
| ATOM | 628 | HB2  | GLN | 39 | 11.347 | 15.924 | -6.904 | 1.00 | 0.00 |
| ATOM | 629 | HB3  | GLN | 39 | 12.160 | 16.319 | -5.370 | 1.00 | 0.00 |
| ATOM | 630 | CG   | GLN | 39 | 13.499 | 15.810 | -6.981 | 1.00 | 0.00 |
| ATOM | 631 | HG2  | GLN | 39 | 13.630 | 14.980 | -7.676 | 1.00 | 0.00 |
| ATOM | 632 | HG3  | GLN | 39 | 13.461 | 16.747 | -7.537 | 1.00 | 0.00 |
| ATOM | 633 | CD   | GLN | 39 | 14.690 | 15.850 | -6.044 | 1.00 | 0.00 |
| ATOM | 634 | OE1  | GLN | 39 | 14.580 | 16.233 | -4.882 | 1.00 | 0.00 |
| ATOM | 635 | NE2  | GLN | 39 | 15.828 | 15.424 | -6.547 | 1.00 | 0.00 |
| ATOM | 636 | HE21 | GLN | 39 | 16.661 | 15.424 | -5.976 | 1.00 | 0.00 |
| ATOM | 637 | HE22 | GLN | 39 | 15.864 | 15.098 | -7.503 | 1.00 | 0.00 |
| ATOM | 638 | C    | GLN | 39 | 13.042 | 13.842 | -4.733 | 1.00 | 0.00 |
| ATOM | 639 | O    | GLN | 39 | 14.104 | 13.325 | -5.074 | 1.00 | 0.00 |
| ATOM | 640 | N    | GLN | 40 | 12.721 | 14.090 | -3.459 | 1.00 | 0.00 |
| ATOM | 641 | H    | GLN | 40 | 11.853 | 14.556 | -3.237 | 1.00 | 0.00 |
| ATOM | 642 | CA   | GLN | 40 | 13.618 | 13.767 | -2.380 | 1.00 | 0.00 |

|      |     |      |     |    |        |        |        |      |      |
|------|-----|------|-----|----|--------|--------|--------|------|------|
| ATOM | 643 | HA   | GLN | 40 | 14.653 | 13.864 | -2.709 | 1.00 | 0.00 |
| ATOM | 644 | CB   | GLN | 40 | 13.384 | 14.725 | -1.213 | 1.00 | 0.00 |
| ATOM | 645 | HB2  | GLN | 40 | 13.164 | 15.718 | -1.605 | 1.00 | 0.00 |
| ATOM | 646 | HB3  | GLN | 40 | 12.537 | 14.371 | -0.626 | 1.00 | 0.00 |
| ATOM | 647 | CG   | GLN | 40 | 14.631 | 14.792 | -0.322 | 1.00 | 0.00 |
| ATOM | 648 | HG2  | GLN | 40 | 15.458 | 14.374 | -0.897 | 1.00 | 0.00 |
| ATOM | 649 | HG3  | GLN | 40 | 14.862 | 15.822 | -0.050 | 1.00 | 0.00 |
| ATOM | 650 | CD   | GLN | 40 | 14.465 | 13.976 | 0.956  | 1.00 | 0.00 |
| ATOM | 651 | OE1  | GLN | 40 | 13.389 | 13.530 | 1.335  | 1.00 | 0.00 |
| ATOM | 652 | NE2  | GLN | 40 | 15.563 | 13.815 | 1.674  | 1.00 | 0.00 |
| ATOM | 653 | HE21 | GLN | 40 | 15.528 | 13.285 | 2.533  | 1.00 | 0.00 |
| ATOM | 654 | HE22 | GLN | 40 | 16.432 | 14.222 | 1.360  | 1.00 | 0.00 |
| ATOM | 655 | C    | GLN | 40 | 13.445 | 12.315 | -1.941 | 1.00 | 0.00 |
| ATOM | 656 | O    | GLN | 40 | 14.168 | 11.822 | -1.085 | 1.00 | 0.00 |
| ATOM | 657 | N    | GLY | 41 | 12.464 | 11.622 | -2.520 | 1.00 | 0.00 |
| ATOM | 658 | H    | GLY | 41 | 11.873 | 12.095 | -3.188 | 1.00 | 0.00 |
| ATOM | 659 | CA   | GLY | 41 | 12.203 | 10.230 | -2.241 | 1.00 | 0.00 |
| ATOM | 660 | HA2  | GLY | 41 | 13.135 | 9.744  | -1.953 | 1.00 | 0.00 |
| ATOM | 661 | HA3  | GLY | 41 | 11.488 | 10.159 | -1.422 | 1.00 | 0.00 |
| ATOM | 662 | C    | GLY | 41 | 11.634 | 9.524  | -3.454 | 1.00 | 0.00 |
| ATOM | 663 | O    | GLY | 41 | 10.510 | 9.065  | -3.449 | 1.00 | 0.00 |
| ATOM | 664 | N    | PRO | 42 | 12.387 | 9.454  | -4.551 | 1.00 | 0.00 |

|      |     |     |     |    |        |        |        |      |      |
|------|-----|-----|-----|----|--------|--------|--------|------|------|
| ATOM | 665 | CD  | PRO | 42 | 13.728 | 9.983  | -4.689 | 1.00 | 0.00 |
| ATOM | 666 | HD2 | PRO | 42 | 14.386 | 9.406  | -4.039 | 1.00 | 0.00 |
| ATOM | 667 | HD3 | PRO | 42 | 13.715 | 11.022 | -4.362 | 1.00 | 0.00 |
| ATOM | 668 | CG  | PRO | 42 | 14.091 | 9.842  | -6.164 | 1.00 | 0.00 |
| ATOM | 669 | HG2 | PRO | 42 | 14.941 | 9.165  | -6.258 | 1.00 | 0.00 |
| ATOM | 670 | HG3 | PRO | 42 | 14.362 | 10.821 | -6.558 | 1.00 | 0.00 |
| ATOM | 671 | CB  | PRO | 42 | 12.854 | 9.288  | -6.878 | 1.00 | 0.00 |
| ATOM | 672 | HB2 | PRO | 42 | 13.123 | 8.458  | -7.531 | 1.00 | 0.00 |
| ATOM | 673 | HB3 | PRO | 42 | 12.349 | 10.059 | -7.460 | 1.00 | 0.00 |
| ATOM | 674 | CA  | PRO | 42 | 11.937 | 8.794  | -5.763 | 1.00 | 0.00 |
| ATOM | 675 | HA  | PRO | 42 | 10.924 | 9.132  | -5.981 | 1.00 | 0.00 |
| ATOM | 676 | C   | PRO | 42 | 11.946 | 7.288  | -5.622 | 1.00 | 0.00 |
| ATOM | 677 | O   | PRO | 42 | 11.107 | 6.597  | -6.213 | 1.00 | 0.00 |
| ATOM | 678 | N   | SER | 43 | 12.881 | 6.790  | -4.820 | 1.00 | 0.00 |
| ATOM | 679 | H   | SER | 43 | 13.543 | 7.421  | -4.393 | 1.00 | 0.00 |
| ATOM | 680 | CA  | SER | 43 | 13.029 | 5.375  | -4.576 | 1.00 | 0.00 |
| ATOM | 681 | HA  | SER | 43 | 12.926 | 4.832  | -5.516 | 1.00 | 0.00 |
| ATOM | 682 | CB  | SER | 43 | 14.401 | 5.056  | -3.975 | 1.00 | 0.00 |
| ATOM | 683 | HB2 | SER | 43 | 14.299 | 5.003  | -2.891 | 1.00 | 0.00 |
| ATOM | 684 | HB3 | SER | 43 | 14.728 | 4.088  | -4.356 | 1.00 | 0.00 |
| ATOM | 685 | OG  | SER | 43 | 15.362 | 6.047  | -4.313 | 1.00 | 0.00 |
| ATOM | 686 | HG  | SER | 43 | 16.208 | 5.818  | -3.922 | 1.00 | 0.00 |

|      |     |      |     |    |        |       |        |      |      |
|------|-----|------|-----|----|--------|-------|--------|------|------|
| ATOM | 687 | C    | SER | 43 | 11.913 | 4.895 | -3.655 | 1.00 | 0.00 |
| ATOM | 688 | O    | SER | 43 | 12.122 | 4.584 | -2.489 | 1.00 | 0.00 |
| ATOM | 689 | N    | LEU | 44 | 10.686 | 4.850 | -4.172 | 1.00 | 0.00 |
| ATOM | 690 | H    | LEU | 44 | 10.543 | 5.158 | -5.123 | 1.00 | 0.00 |
| ATOM | 691 | CA   | LEU | 44 | 9.541  | 4.427 | -3.414 | 1.00 | 0.00 |
| ATOM | 692 | HA   | LEU | 44 | 9.865  | 3.963 | -2.482 | 1.00 | 0.00 |
| ATOM | 693 | CB   | LEU | 44 | 8.651  | 5.624 | -3.081 | 1.00 | 0.00 |
| ATOM | 694 | HB2  | LEU | 44 | 8.869  | 6.370 | -3.845 | 1.00 | 0.00 |
| ATOM | 695 | HB3  | LEU | 44 | 7.607  | 5.320 | -3.158 | 1.00 | 0.00 |
| ATOM | 696 | CG   | LEU | 44 | 8.909  | 6.226 | -1.689 | 1.00 | 0.00 |
| ATOM | 697 | HG   | LEU | 44 | 9.900  | 5.921 | -1.354 | 1.00 | 0.00 |
| ATOM | 698 | CD1  | LEU | 44 | 8.833  | 7.734 | -1.729 | 1.00 | 0.00 |
| ATOM | 699 | HD11 | LEU | 44 | 7.842  | 8.039 | -2.064 | 1.00 | 0.00 |
| ATOM | 700 | HD12 | LEU | 44 | 9.019  | 8.134 | -0.733 | 1.00 | 0.00 |
| ATOM | 701 | HD13 | LEU | 44 | 9.583  | 8.118 | -2.420 | 1.00 | 0.00 |
| ATOM | 702 | CD2  | LEU | 44 | 7.922  | 5.698 | -0.670 | 1.00 | 0.00 |
| ATOM | 703 | HD21 | LEU | 44 | 8.015  | 4.614 | -0.601 | 1.00 | 0.00 |
| ATOM | 704 | HD22 | LEU | 44 | 8.131  | 6.142 | 0.303  | 1.00 | 0.00 |
| ATOM | 705 | HD23 | LEU | 44 | 6.909  | 5.956 | -0.977 | 1.00 | 0.00 |
| ATOM | 706 | C    | LEU | 44 | 8.813  | 3.400 | -4.220 | 1.00 | 0.00 |
| ATOM | 707 | O    | LEU | 44 | 8.399  | 2.432 | -3.654 | 1.00 | 0.00 |
| ATOM | 708 | N    | ARG | 45 | 8.649  | 3.572 | -5.527 | 1.00 | 0.00 |

|      |     |      |     |    |       |       |        |      |      |
|------|-----|------|-----|----|-------|-------|--------|------|------|
| ATOM | 709 | H    | ARG | 45 | 9.018 | 4.413 | -5.946 | 1.00 | 0.00 |
| ATOM | 710 | CA   | ARG | 45 | 7.975 | 2.621 | -6.380 | 1.00 | 0.00 |
| ATOM | 711 | HA   | ARG | 45 | 6.962 | 2.452 | -6.014 | 1.00 | 0.00 |
| ATOM | 712 | CB   | ARG | 45 | 7.895 | 3.142 | -7.811 | 1.00 | 0.00 |
| ATOM | 713 | HB2  | ARG | 45 | 8.897 | 3.423 | -8.136 | 1.00 | 0.00 |
| ATOM | 714 | HB3  | ARG | 45 | 7.517 | 2.344 | -8.451 | 1.00 | 0.00 |
| ATOM | 715 | CG   | ARG | 45 | 6.972 | 4.351 | -7.907 | 1.00 | 0.00 |
| ATOM | 716 | HG2  | ARG | 45 | 7.481 | 5.209 | -7.468 | 1.00 | 0.00 |
| ATOM | 717 | HG3  | ARG | 45 | 6.771 | 4.548 | -8.960 | 1.00 | 0.00 |
| ATOM | 718 | CD   | ARG | 45 | 5.644 | 4.110 | -7.168 | 1.00 | 0.00 |
| ATOM | 719 | HD2  | ARG | 45 | 5.412 | 3.045 | -7.169 | 1.00 | 0.00 |
| ATOM | 720 | HD3  | ARG | 45 | 5.727 | 4.462 | -6.140 | 1.00 | 0.00 |
| ATOM | 721 | NE   | ARG | 45 | 4.545 | 4.832 | -7.826 | 1.00 | 0.00 |
| ATOM | 722 | HE   | ARG | 45 | 3.806 | 4.269 | -8.223 | 1.00 | 0.00 |
| ATOM | 723 | CZ   | ARG | 45 | 4.443 | 6.146 | -7.898 | 1.00 | 0.00 |
| ATOM | 724 | NH1  | ARG | 45 | 5.348 | 6.920 | -7.336 | 1.00 | 0.00 |
| ATOM | 725 | HH11 | ARG | 45 | 6.128 | 6.506 | -6.845 | 1.00 | 0.00 |
| ATOM | 726 | HH12 | ARG | 45 | 5.258 | 7.924 | -7.399 | 1.00 | 0.00 |
| ATOM | 727 | NH2  | ARG | 45 | 3.455 | 6.693 | -8.567 | 1.00 | 0.00 |
| ATOM | 728 | HH21 | ARG | 45 | 2.774 | 6.105 | -9.026 | 1.00 | 0.00 |
| ATOM | 729 | HH22 | ARG | 45 | 3.381 | 7.699 | -8.620 | 1.00 | 0.00 |
| ATOM | 730 | C    | ARG | 45 | 8.708 | 1.322 | -6.399 | 1.00 | 0.00 |

|      |     |     |     |    |        |        |         |      |      |
|------|-----|-----|-----|----|--------|--------|---------|------|------|
| ATOM | 731 | O   | ARG | 45 | 8.231  | 0.372  | -5.852  | 1.00 | 0.00 |
| ATOM | 732 | N   | GLU | 46 | 9.909  | 1.285  | -6.939  | 1.00 | 0.00 |
| ATOM | 733 | H   | GLU | 46 | 10.287 | 2.125  | -7.352  | 1.00 | 0.00 |
| ATOM | 734 | CA  | GLU | 46 | 10.704 | 0.069  | -7.000  | 1.00 | 0.00 |
| ATOM | 735 | HA  | GLU | 46 | 10.190 | -0.681 | -7.601  | 1.00 | 0.00 |
| ATOM | 736 | CB  | GLU | 46 | 12.068 | 0.358  | -7.638  | 1.00 | 0.00 |
| ATOM | 737 | HB2 | GLU | 46 | 12.534 | 1.190  | -7.111  | 1.00 | 0.00 |
| ATOM | 738 | HB3 | GLU | 46 | 12.696 | -0.528 | -7.543  | 1.00 | 0.00 |
| ATOM | 739 | CG  | GLU | 46 | 11.910 | 0.716  | -9.121  | 1.00 | 0.00 |
| ATOM | 740 | HG2 | GLU | 46 | 11.672 | -0.201 | -9.661  | 1.00 | 0.00 |
| ATOM | 741 | HG3 | GLU | 46 | 11.096 | 1.430  | -9.244  | 1.00 | 0.00 |
| ATOM | 742 | CD  | GLU | 46 | 13.201 | 1.314  | -9.677  | 1.00 | 0.00 |
| ATOM | 743 | OE1 | GLU | 46 | 13.703 | 2.274  | -9.047  | 1.00 | 0.00 |
| ATOM | 744 | OE2 | GLU | 46 | 13.653 | 0.823  | -10.731 | 1.00 | 0.00 |
| ATOM | 745 | C   | GLU | 46 | 10.897 | -0.518 | -5.602  | 1.00 | 0.00 |
| ATOM | 746 | O   | GLU | 46 | 11.176 | -1.705 | -5.461  | 1.00 | 0.00 |
| ATOM | 747 | N   | GLN | 47 | 10.712 | 0.318  | -4.568  | 1.00 | 0.00 |
| ATOM | 748 | H   | GLN | 47 | 10.533 | 1.294  | -4.753  | 1.00 | 0.00 |
| ATOM | 749 | CA  | GLN | 47 | 10.811 | -0.106 | -3.208  | 1.00 | 0.00 |
| ATOM | 750 | HA  | GLN | 47 | 11.577 | -0.876 | -3.114  | 1.00 | 0.00 |
| ATOM | 751 | CB  | GLN | 47 | 11.189 | 1.068  | -2.315  | 1.00 | 0.00 |
| ATOM | 752 | HB2 | GLN | 47 | 11.142 | 1.988  | -2.897  | 1.00 | 0.00 |



|      |     |      |     |    |        |        |        |      |      |
|------|-----|------|-----|----|--------|--------|--------|------|------|
| ATOM | 753 | HB3  | GLN | 47 | 10.484 | 1.126  | -1.486 | 1.00 | 0.00 |
| ATOM | 754 | CG   | GLN | 47 | 12.609 | 0.883  | -1.766 | 1.00 | 0.00 |
| ATOM | 755 | HG2  | GLN | 47 | 12.687 | -0.099 | -1.298 | 1.00 | 0.00 |
| ATOM | 756 | HG3  | GLN | 47 | 13.339 | 0.959  | -2.572 | 1.00 | 0.00 |
| ATOM | 757 | CD   | GLN | 47 | 12.924 | 1.945  | -0.723 | 1.00 | 0.00 |
| ATOM | 758 | OE1  | GLN | 47 | 13.883 | 2.694  | -0.824 | 1.00 | 0.00 |
| ATOM | 759 | NE2  | GLN | 47 | 12.098 | 1.996  | 0.311  | 1.00 | 0.00 |
| ATOM | 760 | HE21 | GLN | 47 | 12.249 | 2.677  | 1.041  | 1.00 | 0.00 |
| ATOM | 761 | HE22 | GLN | 47 | 11.321 | 1.353  | 0.365  | 1.00 | 0.00 |
| ATOM | 762 | C    | GLN | 47 | 9.523  | -0.719 | -2.752 | 1.00 | 0.00 |
| ATOM | 763 | O    | GLN | 47 | 9.573  | -1.817 | -2.286 | 1.00 | 0.00 |
| ATOM | 764 | N    | CYX | 48 | 8.388  | -0.063 | -2.889 | 1.00 | 0.00 |
| ATOM | 765 | H    | CYX | 48 | 8.477  | 0.865  | -3.277 | 1.00 | 0.00 |
| ATOM | 766 | CA   | CYX | 48 | 7.088  | -0.517 | -2.512 | 1.00 | 0.00 |
| ATOM | 767 | HA   | CYX | 48 | 7.128  | -0.878 | -1.484 | 1.00 | 0.00 |
| ATOM | 768 | CB   | CYX | 48 | 6.036  | 0.578  | -2.602 | 1.00 | 0.00 |
| ATOM | 769 | HB2  | CYX | 48 | 5.733  | 0.874  | -1.598 | 1.00 | 0.00 |
| ATOM | 770 | HB3  | CYX | 48 | 6.451  | 1.439  | -3.125 | 1.00 | 0.00 |
| ATOM | 771 | SG   | CYX | 48 | 4.501  | 0.148  | -3.459 | 1.00 | 0.00 |
| ATOM | 772 | C    | CYX | 48 | 6.712  | -1.662 | -3.394 | 1.00 | 0.00 |
| ATOM | 773 | O    | CYX | 48 | 6.254  | -2.667 | -2.926 | 1.00 | 0.00 |
| ATOM | 774 | N    | CYX | 49 | 6.941  | -1.575 | -4.696 | 1.00 | 0.00 |

|      |     |      |     |    |        |        |        |      |      |
|------|-----|------|-----|----|--------|--------|--------|------|------|
| ATOM | 775 | H    | CYX | 49 | 7.301  | -0.693 | -5.030 | 1.00 | 0.00 |
| ATOM | 776 | CA   | CYX | 49 | 6.671  | -2.610 | -5.659 | 1.00 | 0.00 |
| ATOM | 777 | HA   | CYX | 49 | 5.593  | -2.749 | -5.737 | 1.00 | 0.00 |
| ATOM | 778 | CB   | CYX | 49 | 7.223  | -2.266 | -7.049 | 1.00 | 0.00 |
| ATOM | 779 | HB2  | CYX | 49 | 8.304  | -2.139 | -6.990 | 1.00 | 0.00 |
| ATOM | 780 | HB3  | CYX | 49 | 6.991  | -3.074 | -7.743 | 1.00 | 0.00 |
| ATOM | 781 | SG   | CYX | 49 | 6.602  | -0.735 | -7.802 | 1.00 | 0.00 |
| ATOM | 782 | C    | CYX | 49 | 7.277  | -3.910 | -5.140 | 1.00 | 0.00 |
| ATOM | 783 | O    | CYX | 49 | 6.827  | -4.984 | -5.510 | 1.00 | 0.00 |
| ATOM | 784 | N    | ASN | 50 | 8.309  | -3.814 | -4.289 | 1.00 | 0.00 |
| ATOM | 785 | H    | ASN | 50 | 8.681  | -2.898 | -4.084 | 1.00 | 0.00 |
| ATOM | 786 | CA   | ASN | 50 | 8.897  | -4.943 | -3.644 | 1.00 | 0.00 |
| ATOM | 787 | HA   | ASN | 50 | 8.632  | -5.862 | -4.167 | 1.00 | 0.00 |
| ATOM | 788 | CB   | ASN | 50 | 10.413 | -4.794 | -3.660 | 1.00 | 0.00 |
| ATOM | 789 | HB2  | ASN | 50 | 10.695 | -3.777 | -3.933 | 1.00 | 0.00 |
| ATOM | 790 | HB3  | ASN | 50 | 10.797 | -5.023 | -2.666 | 1.00 | 0.00 |
| ATOM | 791 | CG   | ASN | 50 | 11.037 | -5.750 | -4.650 | 1.00 | 0.00 |
| ATOM | 792 | OD1  | ASN | 50 | 11.605 | -6.774 | -4.302 | 1.00 | 0.00 |
| ATOM | 793 | ND2  | ASN | 50 | 10.905 | -5.414 | -5.920 | 1.00 | 0.00 |
| ATOM | 794 | HD21 | ASN | 50 | 11.297 | -6.006 | -6.639 | 1.00 | 0.00 |
| ATOM | 795 | HD22 | ASN | 50 | 10.413 | -4.568 | -6.167 | 1.00 | 0.00 |
| ATOM | 796 | C    | ASN | 50 | 8.456  | -5.045 | -2.215 | 1.00 | 0.00 |

|      |     |     |     |    |       |        |        |      |      |
|------|-----|-----|-----|----|-------|--------|--------|------|------|
| ATOM | 797 | O   | ASN | 50 | 8.218 | -6.124 | -1.763 | 1.00 | 0.00 |
| ATOM | 798 | N   | GLU | 51 | 8.343 | -3.956 | -1.486 | 1.00 | 0.00 |
| ATOM | 799 | H   | GLU | 51 | 8.639 | -3.100 | -1.931 | 1.00 | 0.00 |
| ATOM | 800 | CA  | GLU | 51 | 7.927 | -3.901 | -0.113 | 1.00 | 0.00 |
| ATOM | 801 | HA  | GLU | 51 | 8.509 | -4.618 | 0.466  | 1.00 | 0.00 |
| ATOM | 802 | CB  | GLU | 51 | 8.131 | -2.505 | 0.487  | 1.00 | 0.00 |
| ATOM | 803 | HB2 | GLU | 51 | 8.704 | -2.605 | 1.409  | 1.00 | 0.00 |
| ATOM | 804 | HB3 | GLU | 51 | 8.692 | -1.901 | -0.226 | 1.00 | 0.00 |
| ATOM | 805 | CG  | GLU | 51 | 6.796 | -1.828 | 0.789  | 1.00 | 0.00 |
| ATOM | 806 | HG2 | GLU | 51 | 6.253 | -1.840 | -0.157 | 1.00 | 0.00 |
| ATOM | 807 | HG3 | GLU | 51 | 6.215 | -2.353 | 1.547  | 1.00 | 0.00 |
| ATOM | 808 | CD  | GLU | 51 | 7.013 | -0.424 | 1.217  | 1.00 | 0.00 |
| ATOM | 809 | OE1 | GLU | 51 | 7.278 | -0.124 | 2.398  | 1.00 | 0.00 |
| ATOM | 810 | OE2 | GLU | 51 | 6.819 | 0.416  | 0.346  | 1.00 | 0.00 |
| ATOM | 811 | C   | GLU | 51 | 6.474 | -4.359 | 0.006  | 1.00 | 0.00 |
| ATOM | 812 | O   | GLU | 51 | 5.977 | -4.586 | 1.099  | 1.00 | 0.00 |
| ATOM | 813 | N   | LEU | 52 | 5.780 | -4.484 | -1.119 | 1.00 | 0.00 |
| ATOM | 814 | H   | LEU | 52 | 6.215 | -4.170 | -1.975 | 1.00 | 0.00 |
| ATOM | 815 | CA  | LEU | 52 | 4.412 | -4.896 | -1.165 | 1.00 | 0.00 |
| ATOM | 816 | HA  | LEU | 52 | 3.988 | -4.904 | -0.161 | 1.00 | 0.00 |
| ATOM | 817 | CB  | LEU | 52 | 3.604 | -3.918 | -2.031 | 1.00 | 0.00 |
| ATOM | 818 | HB2 | LEU | 52 | 2.724 | -3.748 | -1.411 | 1.00 | 0.00 |

|      |     |          |    |       |        |        |      |      |
|------|-----|----------|----|-------|--------|--------|------|------|
| ATOM | 819 | HB3 LEU  | 52 | 4.150 | -2.982 | -2.150 | 1.00 | 0.00 |
| ATOM | 820 | CG LEU   | 52 | 3.168 | -4.433 | -3.407 | 1.00 | 0.00 |
| ATOM | 821 | HG LEU   | 52 | 2.801 | -3.584 | -3.984 | 1.00 | 0.00 |
| ATOM | 822 | CD1 LEU  | 52 | 4.297 | -5.100 | -4.156 | 1.00 | 0.00 |
| ATOM | 823 | HD11 LEU | 52 | 4.664 | -5.950 | -3.580 | 1.00 | 0.00 |
| ATOM | 824 | HD12 LEU | 52 | 3.936 | -5.447 | -5.124 | 1.00 | 0.00 |
| ATOM | 825 | HD13 LEU | 52 | 5.107 | -4.386 | -4.305 | 1.00 | 0.00 |
| ATOM | 826 | CD2 LEU  | 52 | 1.968 | -5.346 | -3.283 | 1.00 | 0.00 |
| ATOM | 827 | HD21 LEU | 52 | 1.139 | -4.799 | -2.834 | 1.00 | 0.00 |
| ATOM | 828 | HD22 LEU | 52 | 1.676 | -5.700 | -4.272 | 1.00 | 0.00 |
| ATOM | 829 | HD23 LEU | 52 | 2.223 | -6.199 | -2.654 | 1.00 | 0.00 |
| ATOM | 830 | C LEU    | 52 | 4.361 | -6.352 | -1.597 | 1.00 | 0.00 |
| ATOM | 831 | O LEU    | 52 | 3.367 | -7.012 | -1.351 | 1.00 | 0.00 |
| ATOM | 832 | N TYR    | 53 | 5.420 | -6.833 | -2.259 | 1.00 | 0.00 |
| ATOM | 833 | H TYR    | 53 | 6.237 | -6.246 | -2.340 | 1.00 | 0.00 |
| ATOM | 834 | CA TYR   | 53 | 5.470 | -8.146 | -2.824 | 1.00 | 0.00 |
| ATOM | 835 | HA TYR   | 53 | 4.465 | -8.539 | -2.977 | 1.00 | 0.00 |
| ATOM | 836 | CB TYR   | 53 | 6.175 | -8.067 | -4.178 | 1.00 | 0.00 |
| ATOM | 837 | HB2 TYR  | 53 | 5.700 | -7.261 | -4.737 | 1.00 | 0.00 |
| ATOM | 838 | HB3 TYR  | 53 | 7.216 | -7.810 | -3.984 | 1.00 | 0.00 |
| ATOM | 839 | CG TYR   | 53 | 6.113 | -9.346 | -4.988 | 1.00 | 0.00 |
| ATOM | 840 | CD1 TYR  | 53 | 4.874 | -9.889 | -5.359 | 1.00 | 0.00 |

|      |     |     |     |    |       |         |        |      |      |
|------|-----|-----|-----|----|-------|---------|--------|------|------|
| ATOM | 841 | HD1 | TYR | 53 | 3.961 | -9.378  | -5.054 | 1.00 | 0.00 |
| ATOM | 842 | CE1 | TYR | 53 | 4.798 | -11.071 | -6.110 | 1.00 | 0.00 |
| ATOM | 843 | HE1 | TYR | 53 | 3.834 | -11.481 | -6.412 | 1.00 | 0.00 |
| ATOM | 844 | CZ  | TYR | 53 | 5.988 | -11.722 | -6.485 | 1.00 | 0.00 |
| ATOM | 845 | OH  | TYR | 53 | 5.931 | -12.878 | -7.195 | 1.00 | 0.00 |
| ATOM | 846 | HH  | TYR | 53 | 5.032 | -13.158 | -7.385 | 1.00 | 0.00 |
| ATOM | 847 | CE2 | TYR | 53 | 7.240 | -11.189 | -6.117 | 1.00 | 0.00 |
| ATOM | 848 | HE2 | TYR | 53 | 8.161 | -11.695 | -6.408 | 1.00 | 0.00 |
| ATOM | 849 | CD2 | TYR | 53 | 7.297 | -9.997  | -5.369 | 1.00 | 0.00 |
| ATOM | 850 | HD2 | TYR | 53 | 8.262 | -9.578  | -5.085 | 1.00 | 0.00 |
| ATOM | 851 | C   | TYR | 53 | 6.268 | -9.026  | -1.915 | 1.00 | 0.00 |
| ATOM | 852 | O   | TYR | 53 | 6.055 | -10.218 | -1.877 | 1.00 | 0.00 |
| ATOM | 853 | N   | GLN | 54 | 7.224 | -8.463  | -1.188 | 1.00 | 0.00 |
| ATOM | 854 | H   | GLN | 54 | 7.374 | -7.473  | -1.322 | 1.00 | 0.00 |
| ATOM | 855 | CA  | GLN | 54 | 8.078 | -9.163  | -0.270 | 1.00 | 0.00 |
| ATOM | 856 | HA  | GLN | 54 | 8.704 | -9.865  | -0.821 | 1.00 | 0.00 |
| ATOM | 857 | CB  | GLN | 54 | 8.986 | -8.193  | 0.496  | 1.00 | 0.00 |
| ATOM | 858 | HB2 | GLN | 54 | 9.543 | -8.761  | 1.241  | 1.00 | 0.00 |
| ATOM | 859 | HB3 | GLN | 54 | 9.682 | -7.743  | -0.212 | 1.00 | 0.00 |
| ATOM | 860 | CG  | GLN | 54 | 8.181 | -7.093  | 1.190  | 1.00 | 0.00 |
| ATOM | 861 | HG2 | GLN | 54 | 7.701 | -6.444  | 0.457  | 1.00 | 0.00 |
| ATOM | 862 | HG3 | GLN | 54 | 7.418 | -7.581  | 1.797  | 1.00 | 0.00 |

|      |     |      |     |    |        |         |       |      |      |
|------|-----|------|-----|----|--------|---------|-------|------|------|
| ATOM | 863 | CD   | GLN | 54 | 9.048  | -6.244  | 2.094 | 1.00 | 0.00 |
| ATOM | 864 | OE1  | GLN | 54 | 10.214 | -5.975  | 1.820 | 1.00 | 0.00 |
| ATOM | 865 | NE2  | GLN | 54 | 8.463  | -5.774  | 3.173 | 1.00 | 0.00 |
| ATOM | 866 | HE21 | GLN | 54 | 8.987  | -5.200  | 3.818 | 1.00 | 0.00 |
| ATOM | 867 | HE22 | GLN | 54 | 7.492  | -5.989  | 3.352 | 1.00 | 0.00 |
| ATOM | 868 | C    | GLN | 54 | 7.228  | -9.968  | 0.701 | 1.00 | 0.00 |
| ATOM | 869 | O    | GLN | 54 | 7.675  | -10.994 | 1.198 | 1.00 | 0.00 |
| ATOM | 870 | N    | GLU | 55 | 5.993  | -9.510  | 0.936 | 1.00 | 0.00 |
| ATOM | 871 | H    | GLU | 55 | 5.722  | -8.614  | 0.556 | 1.00 | 0.00 |
| ATOM | 872 | CA   | GLU | 55 | 5.065  | -10.196 | 1.789 | 1.00 | 0.00 |
| ATOM | 873 | HA   | GLU | 55 | 5.603  | -10.712 | 2.584 | 1.00 | 0.00 |
| ATOM | 874 | CB   | GLU | 55 | 4.101  | -9.208  | 2.418 | 1.00 | 0.00 |
| ATOM | 875 | HB2  | GLU | 55 | 3.403  | -8.873  | 1.650 | 1.00 | 0.00 |
| ATOM | 876 | HB3  | GLU | 55 | 3.552  | -9.720  | 3.208 | 1.00 | 0.00 |
| ATOM | 877 | CG   | GLU | 55 | 4.828  | -8.006  | 3.002 | 1.00 | 0.00 |
| ATOM | 878 | HG2  | GLU | 55 | 5.759  | -8.401  | 3.407 | 1.00 | 0.00 |
| ATOM | 879 | HG3  | GLU | 55 | 5.052  | -7.257  | 2.243 | 1.00 | 0.00 |
| ATOM | 880 | CD   | GLU | 55 | 4.024  | -7.373  | 4.113 | 1.00 | 0.00 |
| ATOM | 881 | OE1  | GLU | 55 | 3.084  | -7.996  | 4.640 | 1.00 | 0.00 |
| ATOM | 882 | OE2  | GLU | 55 | 4.338  | -6.208  | 4.359 | 1.00 | 0.00 |
| ATOM | 883 | C    | GLU | 55 | 4.338  | -11.291 | 1.040 | 1.00 | 0.00 |
| ATOM | 884 | O    | GLU | 55 | 3.302  | -11.751 | 1.478 | 1.00 | 0.00 |

|      |     |     |     |    |       |         |        |      |      |
|------|-----|-----|-----|----|-------|---------|--------|------|------|
| ATOM | 885 | N   | ASP | 56 | 4.871 | -11.739 | -0.086 | 1.00 | 0.00 |
| ATOM | 886 | H   | ASP | 56 | 5.760 | -11.342 | -0.354 | 1.00 | 0.00 |
| ATOM | 887 | CA  | ASP | 56 | 4.284 | -12.729 | -0.941 | 1.00 | 0.00 |
| ATOM | 888 | HA  | ASP | 56 | 5.035 | -13.148 | -1.611 | 1.00 | 0.00 |
| ATOM | 889 | CB  | ASP | 56 | 3.709 | -13.861 | -0.082 | 1.00 | 0.00 |
| ATOM | 890 | HB2 | ASP | 56 | 4.399 | -13.893 | 0.761  | 1.00 | 0.00 |
| ATOM | 891 | HB3 | ASP | 56 | 2.711 | -13.606 | 0.274  | 1.00 | 0.00 |
| ATOM | 892 | CG  | ASP | 56 | 3.672 | -15.213 | -0.753 | 1.00 | 0.00 |
| ATOM | 893 | OD1 | ASP | 56 | 4.106 | -15.300 | -1.922 | 1.00 | 0.00 |
| ATOM | 894 | OD2 | ASP | 56 | 3.117 | -16.144 | -0.135 | 1.00 | 0.00 |
| ATOM | 895 | C   | ASP | 56 | 3.170 | -12.110 | -1.773 | 1.00 | 0.00 |
| ATOM | 896 | O   | ASP | 56 | 2.944 | -10.893 | -1.800 | 1.00 | 0.00 |
| ATOM | 897 | N   | GLN | 57 | 2.406 | -12.969 | -2.459 | 1.00 | 0.00 |
| ATOM | 898 | H   | GLN | 57 | 2.636 | -13.953 | -2.451 | 1.00 | 0.00 |
| ATOM | 899 | CA  | GLN | 57 | 1.290 | -12.535 | -3.261 | 1.00 | 0.00 |
| ATOM | 900 | HA  | GLN | 57 | 1.460 | -11.520 | -3.620 | 1.00 | 0.00 |
| ATOM | 901 | CB  | GLN | 57 | 1.123 | -13.459 | -4.468 | 1.00 | 0.00 |
| ATOM | 902 | HB2 | GLN | 57 | 2.043 | -14.025 | -4.613 | 1.00 | 0.00 |
| ATOM | 903 | HB3 | GLN | 57 | 0.300 | -14.148 | -4.278 | 1.00 | 0.00 |
| ATOM | 904 | CG  | GLN | 57 | 0.824 | -12.644 | -5.725 | 1.00 | 0.00 |
| ATOM | 905 | HG2 | GLN | 57 | 1.433 | -11.740 | -5.708 | 1.00 | 0.00 |
| ATOM | 906 | HG3 | GLN | 57 | 1.055 | -13.221 | -6.621 | 1.00 | 0.00 |

|      |     |      |     |    |        |         |        |      |      |
|------|-----|------|-----|----|--------|---------|--------|------|------|
| ATOM | 907 | CD   | GLN | 57 | -0.630 | -12.245 | -5.771 | 1.00 | 0.00 |
| ATOM | 908 | OE1  | GLN | 57 | -1.521 | -13.043 | -5.915 | 1.00 | 0.00 |
| ATOM | 909 | NE2  | GLN | 57 | -0.898 | -10.972 | -5.671 | 1.00 | 0.00 |
| ATOM | 910 | HE21 | GLN | 57 | -1.858 | -10.658 | -5.697 | 1.00 | 0.00 |
| ATOM | 911 | HE22 | GLN | 57 | -0.145 | -10.307 | -5.568 | 1.00 | 0.00 |
| ATOM | 912 | C    | GLN | 57 | 0.014  | -12.494 | -2.447 | 1.00 | 0.00 |
| ATOM | 913 | O    | GLN | 57 | -0.917 | -11.752 | -2.740 | 1.00 | 0.00 |
| ATOM | 914 | N    | VAL | 58 | -0.026 | -13.270 | -1.372 | 1.00 | 0.00 |
| ATOM | 915 | H    | VAL | 58 | 0.752  | -13.890 | -1.198 | 1.00 | 0.00 |
| ATOM | 916 | CA   | VAL | 58 | -1.170 | -13.337 | -0.483 | 1.00 | 0.00 |
| ATOM | 917 | HA   | VAL | 58 | -2.108 | -13.327 | -1.038 | 1.00 | 0.00 |
| ATOM | 918 | CB   | VAL | 58 | -1.118 | -14.612 | 0.368  | 1.00 | 0.00 |
| ATOM | 919 | HB   | VAL | 58 | -0.779 | -14.358 | 1.372  | 1.00 | 0.00 |
| ATOM | 920 | CG1  | VAL | 58 | -2.507 | -15.253 | 0.445  | 1.00 | 0.00 |
| ATOM | 921 | HG11 | VAL | 58 | -2.846 | -15.508 | -0.559 | 1.00 | 0.00 |
| ATOM | 922 | HG12 | VAL | 58 | -2.457 | -16.158 | 1.052  | 1.00 | 0.00 |
| ATOM | 923 | HG13 | VAL | 58 | -3.207 | -14.551 | 0.897  | 1.00 | 0.00 |
| ATOM | 924 | CG2  | VAL | 58 | -0.111 | -15.621 | -0.194 | 1.00 | 0.00 |
| ATOM | 925 | HG21 | VAL | 58 | 0.883  | -15.175 | -0.207 | 1.00 | 0.00 |
| ATOM | 926 | HG22 | VAL | 58 | -0.100 | -16.513 | 0.433  | 1.00 | 0.00 |
| ATOM | 927 | HG23 | VAL | 58 | -0.399 | -15.896 | -1.209 | 1.00 | 0.00 |
| ATOM | 928 | C    | VAL | 58 | -1.215 | -12.077 | 0.360  | 1.00 | 0.00 |



|      |     |      |     |    |        |         |        |      |      |
|------|-----|------|-----|----|--------|---------|--------|------|------|
| ATOM | 929 | O    | VAL | 58 | -2.158 | -11.902 | 1.129  | 1.00 | 0.00 |
| ATOM | 930 | N    | CYX | 59 | -0.230 | -11.191 | 0.184  | 1.00 | 0.00 |
| ATOM | 931 | H    | CYX | 59 | 0.509  | -11.413 | -0.467 | 1.00 | 0.00 |
| ATOM | 932 | CA   | CYX | 59 | -0.155 | -9.954  | 0.900  | 1.00 | 0.00 |
| ATOM | 933 | HA   | CYX | 59 | -0.985 | -9.887  | 1.603  | 1.00 | 0.00 |
| ATOM | 934 | CB   | CYX | 59 | 1.135  | -9.858  | 1.669  | 1.00 | 0.00 |
| ATOM | 935 | HB2  | CYX | 59 | 1.955  | -10.222 | 1.050  | 1.00 | 0.00 |
| ATOM | 936 | HB3  | CYX | 59 | 1.320  | -8.819  | 1.942  | 1.00 | 0.00 |
| ATOM | 937 | SG   | CYX | 59 | 1.211  | -10.832 | 3.216  | 1.00 | 0.00 |
| ATOM | 938 | C    | CYX | 59 | -0.266 | -8.804  | -0.070 | 1.00 | 0.00 |
| ATOM | 939 | O    | CYX | 59 | -0.851 | -7.767  | 0.258  | 1.00 | 0.00 |
| ATOM | 940 | N    | VAL | 60 | 0.177  | -9.015  | -1.318 | 1.00 | 0.00 |
| ATOM | 941 | H    | VAL | 60 | 0.645  | -9.884  | -1.532 | 1.00 | 0.00 |
| ATOM | 942 | CA   | VAL | 60 | 0.075  | -8.018  | -2.359 | 1.00 | 0.00 |
| ATOM | 943 | HA   | VAL | 60 | 0.691  | -7.137  | -2.183 | 1.00 | 0.00 |
| ATOM | 944 | CB   | VAL | 60 | 0.466  | -8.625  | -3.701 | 1.00 | 0.00 |
| ATOM | 945 | HB   | VAL | 60 | 0.113  | -9.656  | -3.736 | 1.00 | 0.00 |
| ATOM | 946 | CG1  | VAL | 60 | -0.147 | -7.839  | -4.855 | 1.00 | 0.00 |
| ATOM | 947 | HG11 | VAL | 60 | 0.206  | -6.809  | -4.822 | 1.00 | 0.00 |
| ATOM | 948 | HG12 | VAL | 60 | 0.147  | -8.293  | -5.801 | 1.00 | 0.00 |
| ATOM | 949 | HG13 | VAL | 60 | -1.234 | -7.854  | -4.768 | 1.00 | 0.00 |
| ATOM | 950 | CG2  | VAL | 60 | 1.970  | -8.722  | -3.837 | 1.00 | 0.00 |

|      |     |      |     |    |        |         |        |      |      |
|------|-----|------|-----|----|--------|---------|--------|------|------|
| ATOM | 951 | HG21 | VAL | 60 | 2.367  | -9.352  | -3.041 | 1.00 | 0.00 |
| ATOM | 952 | HG22 | VAL | 60 | 2.220  | -9.159  | -4.804 | 1.00 | 0.00 |
| ATOM | 953 | HG23 | VAL | 60 | 2.407  | -7.726  | -3.765 | 1.00 | 0.00 |
| ATOM | 954 | C    | VAL | 60 | -1.325 | -7.449  | -2.389 | 1.00 | 0.00 |
| ATOM | 955 | O    | VAL | 60 | -1.523 | -6.324  | -2.814 | 1.00 | 0.00 |
| ATOM | 956 | N    | CYX | 61 | -2.317 | -8.224  | -1.958 | 1.00 | 0.00 |
| ATOM | 957 | H    | CYX | 61 | -2.098 | -9.188  | -1.749 | 1.00 | 0.00 |
| ATOM | 958 | CA   | CYX | 61 | -3.664 | -7.802  | -1.847 | 1.00 | 0.00 |
| ATOM | 959 | HA   | CYX | 61 | -3.767 | -7.076  | -1.041 | 1.00 | 0.00 |
| ATOM | 960 | CB   | CYX | 61 | -4.101 | -7.148  | -3.150 | 1.00 | 0.00 |
| ATOM | 961 | HB2  | CYX | 61 | -3.336 | -7.305  | -3.910 | 1.00 | 0.00 |
| ATOM | 962 | HB3  | CYX | 61 | -5.039 | -7.592  | -3.483 | 1.00 | 0.00 |
| ATOM | 963 | SG   | CYX | 61 | -4.373 | -5.358  | -3.094 | 1.00 | 0.00 |
| ATOM | 964 | C    | CYX | 61 | -4.527 | -9.000  | -1.471 | 1.00 | 0.00 |
| ATOM | 965 | O    | CYX | 61 | -4.075 | -10.123 | -1.571 | 1.00 | 0.00 |
| ATOM | 966 | N    | PRO | 62 | -5.776 | -8.744  | -1.048 | 1.00 | 0.00 |
| ATOM | 967 | CD   | PRO | 62 | -6.785 | -9.697  | -0.631 | 1.00 | 0.00 |
| ATOM | 968 | HD2  | PRO | 62 | -6.431 | -10.195 | 0.272  | 1.00 | 0.00 |
| ATOM | 969 | HD3  | PRO | 62 | -6.909 | -10.433 | -1.426 | 1.00 | 0.00 |
| ATOM | 970 | CG   | PRO | 62 | -8.059 | -8.875  | -0.390 | 1.00 | 0.00 |
| ATOM | 971 | HG2  | PRO | 62 | -8.343 | -8.969  | 0.658  | 1.00 | 0.00 |
| ATOM | 972 | HG3  | PRO | 62 | -8.856 | -9.272  | -1.019 | 1.00 | 0.00 |

|      |     |      |     |    |        |        |        |      |      |
|------|-----|------|-----|----|--------|--------|--------|------|------|
| ATOM | 973 | CB   | PRO | 62 | -7.746 | -7.423 | -0.756 | 1.00 | 0.00 |
| ATOM | 974 | HB2  | PRO | 62 | -8.092 | -6.713 | -0.006 | 1.00 | 0.00 |
| ATOM | 975 | HB3  | PRO | 62 | -8.182 | -7.171 | -1.723 | 1.00 | 0.00 |
| ATOM | 976 | CA   | PRO | 62 | -6.235 | -7.383 | -0.844 | 1.00 | 0.00 |
| ATOM | 977 | HA   | PRO | 62 | -6.000 | -6.810 | -1.741 | 1.00 | 0.00 |
| ATOM | 978 | C    | PRO | 62 | -5.595 | -6.739 | 0.340  | 1.00 | 0.00 |
| ATOM | 979 | O    | PRO | 62 | -5.882 | -5.620 | 0.634  | 1.00 | 0.00 |
| ATOM | 980 | N    | THR | 63 | -4.763 | -7.451 | 1.055  | 1.00 | 0.00 |
| ATOM | 981 | H    | THR | 63 | -4.670 | -8.419 | 0.781  | 1.00 | 0.00 |
| ATOM | 982 | CA   | THR | 63 | -4.028 | -6.994 | 2.208  | 1.00 | 0.00 |
| ATOM | 983 | HA   | THR | 63 | -4.731 | -7.087 | 3.036  | 1.00 | 0.00 |
| ATOM | 984 | CB   | THR | 63 | -2.848 | -7.926 | 2.464  | 1.00 | 0.00 |
| ATOM | 985 | HB   | THR | 63 | -1.939 | -7.418 | 2.142  | 1.00 | 0.00 |
| ATOM | 986 | CG2  | THR | 63 | -2.724 | -8.304 | 3.916  | 1.00 | 0.00 |
| ATOM | 987 | HG21 | THR | 63 | -3.632 | -8.813 | 4.238  | 1.00 | 0.00 |
| ATOM | 988 | HG22 | THR | 63 | -1.870 | -8.968 | 4.047  | 1.00 | 0.00 |
| ATOM | 989 | HG23 | THR | 63 | -2.580 | -7.405 | 4.515  | 1.00 | 0.00 |
| ATOM | 990 | OG1  | THR | 63 | -3.163 | -9.149 | 1.811  | 1.00 | 0.00 |
| ATOM | 991 | HG1  | THR | 63 | -2.447 | -9.776 | 1.942  | 1.00 | 0.00 |
| ATOM | 992 | C    | THR | 63 | -3.558 | -5.586 | 2.035  | 1.00 | 0.00 |
| ATOM | 993 | O    | THR | 63 | -3.873 | -4.809 | 2.912  | 1.00 | 0.00 |
| ATOM | 994 | N    | LEU | 64 | -2.957 | -5.237 | 0.898  | 1.00 | 0.00 |

|      |      |      |     |    |        |        |        |      |      |
|------|------|------|-----|----|--------|--------|--------|------|------|
| ATOM | 995  | H    | LEU | 64 | -2.771 | -5.962 | 0.219  | 1.00 | 0.00 |
| ATOM | 996  | CA   | LEU | 64 | -2.517 | -3.888 | 0.602  | 1.00 | 0.00 |
| ATOM | 997  | HA   | LEU | 64 | -1.649 | -3.634 | 1.210  | 1.00 | 0.00 |
| ATOM | 998  | CB   | LEU | 64 | -2.128 | -3.783 | -0.871 | 1.00 | 0.00 |
| ATOM | 999  | HB2  | LEU | 64 | -1.947 | -4.812 | -1.181 | 1.00 | 0.00 |
| ATOM | 1000 | HB3  | LEU | 64 | -2.963 | -3.375 | -1.440 | 1.00 | 0.00 |
| ATOM | 1001 | CG   | LEU | 64 | -0.872 | -2.942 | -1.132 | 1.00 | 0.00 |
| ATOM | 1002 | HG   | LEU | 64 | -0.230 | -2.982 | -0.252 | 1.00 | 0.00 |
| ATOM | 1003 | CD1  | LEU | 64 | -0.118 | -3.472 | -2.330 | 1.00 | 0.00 |
| ATOM | 1004 | HD11 | LEU | 64 | -0.759 | -3.432 | -3.211 | 1.00 | 0.00 |
| ATOM | 1005 | HD12 | LEU | 64 | 0.770  | -2.863 | -2.500 | 1.00 | 0.00 |
| ATOM | 1006 | HD13 | LEU | 64 | 0.180  | -4.504 | -2.145 | 1.00 | 0.00 |
| ATOM | 1007 | CD2  | LEU | 64 | -1.226 | -1.471 | -1.330 | 1.00 | 0.00 |
| ATOM | 1008 | HD21 | LEU | 64 | -1.719 | -1.092 | -0.435 | 1.00 | 0.00 |
| ATOM | 1009 | HD22 | LEU | 64 | -0.316 | -0.900 | -1.513 | 1.00 | 0.00 |
| ATOM | 1010 | HD23 | LEU | 64 | -1.896 | -1.370 | -2.184 | 1.00 | 0.00 |
| ATOM | 1011 | C    | LEU | 64 | -3.592 | -2.879 | 0.930  | 1.00 | 0.00 |
| ATOM | 1012 | O    | LEU | 64 | -3.278 | -1.861 | 1.535  | 1.00 | 0.00 |
| ATOM | 1013 | N    | LYS | 65 | -4.863 | -3.209 | 0.640  | 1.00 | 0.00 |
| ATOM | 1014 | H    | LYS | 65 | -5.006 | -4.030 | 0.068  | 1.00 | 0.00 |
| ATOM | 1015 | CA   | LYS | 65 | -6.013 | -2.416 | 0.996  | 1.00 | 0.00 |
| ATOM | 1016 | HA   | LYS | 65 | -6.069 | -1.547 | 0.340  | 1.00 | 0.00 |

|      |      |     |     |    |         |        |        |      |      |
|------|------|-----|-----|----|---------|--------|--------|------|------|
| ATOM | 1017 | CB  | LYS | 65 | -7.314  | -3.219 | 0.857  | 1.00 | 0.00 |
| ATOM | 1018 | HB2 | LYS | 65 | -7.428  | -3.525 | -0.183 | 1.00 | 0.00 |
| ATOM | 1019 | HB3 | LYS | 65 | -7.249  | -4.104 | 1.490  | 1.00 | 0.00 |
| ATOM | 1020 | CG  | LYS | 65 | -8.517  | -2.383 | 1.275  | 1.00 | 0.00 |
| ATOM | 1021 | HG2 | LYS | 65 | -8.254  | -1.329 | 1.188  | 1.00 | 0.00 |
| ATOM | 1022 | HG3 | LYS | 65 | -9.346  | -2.607 | 0.603  | 1.00 | 0.00 |
| ATOM | 1023 | CD  | LYS | 65 | -8.934  | -2.688 | 2.720  | 1.00 | 0.00 |
| ATOM | 1024 | HD2 | LYS | 65 | -8.119  | -3.208 | 3.223  | 1.00 | 0.00 |
| ATOM | 1025 | HD3 | LYS | 65 | -9.140  | -1.751 | 3.236  | 1.00 | 0.00 |
| ATOM | 1026 | CE  | LYS | 65 | -10.186 | -3.566 | 2.739  | 1.00 | 0.00 |
| ATOM | 1027 | HE2 | LYS | 65 | -10.748 | -3.405 | 1.819  | 1.00 | 0.00 |
| ATOM | 1028 | HE3 | LYS | 65 | -9.887  | -4.612 | 2.802  | 1.00 | 0.00 |
| ATOM | 1029 | NZ  | LYS | 65 | -11.033 | -3.226 | 3.899  | 1.00 | 0.00 |
| ATOM | 1030 | HZ1 | LYS | 65 | -11.311 | -2.257 | 3.840  | 1.00 | 0.00 |
| ATOM | 1031 | HZ2 | LYS | 65 | -11.855 | -3.813 | 3.899  | 1.00 | 0.00 |
| ATOM | 1032 | HZ3 | LYS | 65 | -10.512 | -3.376 | 4.751  | 1.00 | 0.00 |
| ATOM | 1033 | C   | LYS | 65 | -5.832  | -1.845 | 2.384  | 1.00 | 0.00 |
| ATOM | 1034 | O   | LYS | 65 | -6.280  | -0.767 | 2.623  | 1.00 | 0.00 |
| ATOM | 1035 | N   | GLN | 66 | -5.200  | -2.541 | 3.308  | 1.00 | 0.00 |
| ATOM | 1036 | H   | GLN | 66 | -5.012  | -3.503 | 3.064  | 1.00 | 0.00 |
| ATOM | 1037 | CA  | GLN | 66 | -4.846  | -2.096 | 4.605  | 1.00 | 0.00 |
| ATOM | 1038 | HA  | GLN | 66 | -5.733  | -1.720 | 5.115  | 1.00 | 0.00 |

|      |      |      |     |    |        |        |       |      |      |
|------|------|------|-----|----|--------|--------|-------|------|------|
| ATOM | 1039 | CB   | GLN | 66 | -4.250 | -3.236 | 5.437 | 1.00 | 0.00 |
| ATOM | 1040 | HB2  | GLN | 66 | -4.957 | -4.065 | 5.469 | 1.00 | 0.00 |
| ATOM | 1041 | HB3  | GLN | 66 | -3.320 | -3.570 | 4.976 | 1.00 | 0.00 |
| ATOM | 1042 | CG   | GLN | 66 | -3.966 | -2.748 | 6.870 | 1.00 | 0.00 |
| ATOM | 1043 | HG2  | GLN | 66 | -3.688 | -3.557 | 7.546 | 1.00 | 0.00 |
| ATOM | 1044 | HG3  | GLN | 66 | -3.138 | -2.044 | 6.787 | 1.00 | 0.00 |
| ATOM | 1045 | CD   | GLN | 66 | -5.171 | -2.017 | 7.454 | 1.00 | 0.00 |
| ATOM | 1046 | OE1  | GLN | 66 | -5.058 | -0.984 | 8.090 | 1.00 | 0.00 |
| ATOM | 1047 | NE2  | GLN | 66 | -6.359 | -2.531 | 7.148 | 1.00 | 0.00 |
| ATOM | 1048 | HE21 | GLN | 66 | -7.200 | -2.097 | 7.501 | 1.00 | 0.00 |
| ATOM | 1049 | HE22 | GLN | 66 | -6.415 | -3.353 | 6.564 | 1.00 | 0.00 |
| ATOM | 1050 | C    | GLN | 66 | -3.900 | -0.922 | 4.587 | 1.00 | 0.00 |
| ATOM | 1051 | O    | GLN | 66 | -4.291 | 0.181  | 4.948 | 1.00 | 0.00 |
| ATOM | 1052 | N    | ALA | 67 | -2.645 | -1.145 | 4.203 | 1.00 | 0.00 |
| ATOM | 1053 | H    | ALA | 67 | -2.346 | -2.092 | 4.016 | 1.00 | 0.00 |
| ATOM | 1054 | CA   | ALA | 67 | -1.669 | -0.086 | 4.101 | 1.00 | 0.00 |
| ATOM | 1055 | HA   | ALA | 67 | -1.450 | 0.325  | 5.086 | 1.00 | 0.00 |
| ATOM | 1056 | CB   | ALA | 67 | -0.381 | -0.646 | 3.510 | 1.00 | 0.00 |
| ATOM | 1057 | HB1  | ALA | 67 | -0.582 | -1.053 | 2.519 | 1.00 | 0.00 |
| ATOM | 1058 | HB2  | ALA | 67 | 0.360  | 0.150  | 3.432 | 1.00 | 0.00 |
| ATOM | 1059 | HB3  | ALA | 67 | 0.002  | -1.436 | 4.156 | 1.00 | 0.00 |
| ATOM | 1060 | C    | ALA | 67 | -2.222 | 1.058  | 3.258 | 1.00 | 0.00 |

|      |      |     |     |    |        |        |        |      |      |
|------|------|-----|-----|----|--------|--------|--------|------|------|
| ATOM | 1061 | O   | ALA | 67 | -1.844 | 2.200  | 3.454  | 1.00 | 0.00 |
| ATOM | 1062 | N   | ALA | 68 | -3.199 | 0.783  | 2.401  | 1.00 | 0.00 |
| ATOM | 1063 | H   | ALA | 68 | -3.474 | -0.182 | 2.286  | 1.00 | 0.00 |
| ATOM | 1064 | CA  | ALA | 68 | -3.843 | 1.774  | 1.592  | 1.00 | 0.00 |
| ATOM | 1065 | HA  | ALA | 68 | -3.153 | 2.586  | 1.361  | 1.00 | 0.00 |
| ATOM | 1066 | CB  | ALA | 68 | -4.281 | 1.121  | 0.287  | 1.00 | 0.00 |
| ATOM | 1067 | HB1 | ALA | 68 | -4.979 | 0.312  | 0.501  | 1.00 | 0.00 |
| ATOM | 1068 | HB2 | ALA | 68 | -4.769 | 1.863  | -0.346 | 1.00 | 0.00 |
| ATOM | 1069 | HB3 | ALA | 68 | -3.409 | 0.720  | -0.230 | 1.00 | 0.00 |
| ATOM | 1070 | C   | ALA | 68 | -5.022 | 2.392  | 2.330  | 1.00 | 0.00 |
| ATOM | 1071 | O   | ALA | 68 | -5.394 | 3.543  | 2.129  | 1.00 | 0.00 |
| ATOM | 1072 | N   | LYS | 69 | -5.634 | 1.651  | 3.242  | 1.00 | 0.00 |
| ATOM | 1073 | H   | LYS | 69 | -5.335 | 0.690  | 3.325  | 1.00 | 0.00 |
| ATOM | 1074 | CA  | LYS | 69 | -6.738 | 2.092  | 4.045  | 1.00 | 0.00 |
| ATOM | 1075 | HA  | LYS | 69 | -7.440 | 2.650  | 3.425  | 1.00 | 0.00 |
| ATOM | 1076 | CB  | LYS | 69 | -7.476 | 0.899  | 4.669  | 1.00 | 0.00 |
| ATOM | 1077 | HB2 | LYS | 69 | -7.834 | 0.250  | 3.870  | 1.00 | 0.00 |
| ATOM | 1078 | HB3 | LYS | 69 | -6.780 | 0.346  | 5.301  | 1.00 | 0.00 |
| ATOM | 1079 | CG  | LYS | 69 | -8.663 | 1.373  | 5.511  | 1.00 | 0.00 |
| ATOM | 1080 | HG2 | LYS | 69 | -9.290 | 0.512  | 5.745  | 1.00 | 0.00 |
| ATOM | 1081 | HG3 | LYS | 69 | -8.283 | 1.807  | 6.436  | 1.00 | 0.00 |
| ATOM | 1082 | CD  | LYS | 69 | -9.494 | 2.422  | 4.756  | 1.00 | 0.00 |

|      |      |     |     |    |         |       |       |      |      |
|------|------|-----|-----|----|---------|-------|-------|------|------|
| ATOM | 1083 | HD2 | LYS | 69 | -8.951  | 3.367 | 4.762 | 1.00 | 0.00 |
| ATOM | 1084 | HD3 | LYS | 69 | -9.626  | 2.086 | 3.727 | 1.00 | 0.00 |
| ATOM | 1085 | CE  | LYS | 69 | -10.856 | 2.616 | 5.405 | 1.00 | 0.00 |
| ATOM | 1086 | HE2 | LYS | 69 | -11.584 | 1.988 | 4.891 | 1.00 | 0.00 |
| ATOM | 1087 | HE3 | LYS | 69 | -10.794 | 2.317 | 6.451 | 1.00 | 0.00 |
| ATOM | 1088 | NZ  | LYS | 69 | -11.278 | 4.027 | 5.321 | 1.00 | 0.00 |
| ATOM | 1089 | HZ1 | LYS | 69 | -11.336 | 4.303 | 4.351 | 1.00 | 0.00 |
| ATOM | 1090 | HZ2 | LYS | 69 | -12.183 | 4.134 | 5.757 | 1.00 | 0.00 |
| ATOM | 1091 | HZ3 | LYS | 69 | -10.604 | 4.609 | 5.797 | 1.00 | 0.00 |
| ATOM | 1092 | C   | LYS | 69 | -6.227  | 3.063 | 5.080 | 1.00 | 0.00 |
| ATOM | 1093 | O   | LYS | 69 | -6.913  | 4.013 | 5.398 | 1.00 | 0.00 |
| ATOM | 1094 | N   | SER | 70 | -5.006  | 2.877 | 5.565 | 1.00 | 0.00 |
| ATOM | 1095 | H   | SER | 70 | -4.487  | 2.062 | 5.271 | 1.00 | 0.00 |
| ATOM | 1096 | CA  | SER | 70 | -4.400  | 3.763 | 6.535 | 1.00 | 0.00 |
| ATOM | 1097 | HA  | SER | 70 | -5.168  | 4.379 | 7.003 | 1.00 | 0.00 |
| ATOM | 1098 | CB  | SER | 70 | -3.691  | 2.962 | 7.619 | 1.00 | 0.00 |
| ATOM | 1099 | HB2 | SER | 70 | -4.407  | 2.270 | 8.063 | 1.00 | 0.00 |
| ATOM | 1100 | HB3 | SER | 70 | -2.879  | 2.398 | 7.159 | 1.00 | 0.00 |
| ATOM | 1101 | OG  | SER | 70 | -3.165  | 3.811 | 8.628 | 1.00 | 0.00 |
| ATOM | 1102 | HG  | SER | 70 | -2.725  | 3.280 | 9.296 | 1.00 | 0.00 |
| ATOM | 1103 | C   | SER | 70 | -3.429  | 4.700 | 5.843 | 1.00 | 0.00 |
| ATOM | 1104 | O   | SER | 70 | -2.625  | 5.388 | 6.474 | 1.00 | 0.00 |



|      |      |      |     |    |        |       |       |      |      |
|------|------|------|-----|----|--------|-------|-------|------|------|
| ATOM | 1105 | N    | VAL | 71 | -3.489 | 4.753 | 4.507 | 1.00 | 0.00 |
| ATOM | 1106 | H    | VAL | 71 | -4.105 | 4.123 | 4.013 | 1.00 | 0.00 |
| ATOM | 1107 | CA   | VAL | 71 | -2.633 | 5.625 | 3.731 | 1.00 | 0.00 |
| ATOM | 1108 | HA   | VAL | 71 | -1.576 | 5.527 | 3.978 | 1.00 | 0.00 |
| ATOM | 1109 | CB   | VAL | 71 | -2.814 | 5.341 | 2.240 | 1.00 | 0.00 |
| ATOM | 1110 | HB   | VAL | 71 | -3.282 | 4.362 | 2.127 | 1.00 | 0.00 |
| ATOM | 1111 | CG1  | VAL | 71 | -3.677 | 6.389 | 1.583 | 1.00 | 0.00 |
| ATOM | 1112 | HG11 | VAL | 71 | -3.210 | 7.367 | 1.695 | 1.00 | 0.00 |
| ATOM | 1113 | HG12 | VAL | 71 | -3.786 | 6.158 | 0.523 | 1.00 | 0.00 |
| ATOM | 1114 | HG13 | VAL | 71 | -4.659 | 6.399 | 2.055 | 1.00 | 0.00 |
| ATOM | 1115 | CG2  | VAL | 71 | -1.483 | 5.223 | 1.526 | 1.00 | 0.00 |
| ATOM | 1116 | HG21 | VAL | 71 | -0.907 | 4.407 | 1.963 | 1.00 | 0.00 |
| ATOM | 1117 | HG22 | VAL | 71 | -1.654 | 5.021 | 0.468 | 1.00 | 0.00 |
| ATOM | 1118 | HG23 | VAL | 71 | -0.929 | 6.155 | 1.632 | 1.00 | 0.00 |
| ATOM | 1119 | C    | VAL | 71 | -2.942 | 7.068 | 4.103 | 1.00 | 0.00 |
| ATOM | 1120 | O    | VAL | 71 | -2.232 | 7.992 | 3.765 | 1.00 | 0.00 |
| ATOM | 1121 | N    | ARG | 72 | -4.068 | 7.322 | 4.763 | 1.00 | 0.00 |
| ATOM | 1122 | H    | ARG | 72 | -4.701 | 6.557 | 4.950 | 1.00 | 0.00 |
| ATOM | 1123 | CA   | ARG | 72 | -4.447 | 8.640 | 5.193 | 1.00 | 0.00 |
| ATOM | 1124 | HA   | ARG | 72 | -3.569 | 9.209 | 5.498 | 1.00 | 0.00 |
| ATOM | 1125 | CB   | ARG | 72 | -5.123 | 9.369 | 4.029 | 1.00 | 0.00 |
| ATOM | 1126 | HB2  | ARG | 72 | -5.104 | 8.726 | 3.148 | 1.00 | 0.00 |

|      |      |          |    |        |        |       |      |      |
|------|------|----------|----|--------|--------|-------|------|------|
| ATOM | 1127 | HB3 ARG  | 72 | -6.157 | 9.585  | 4.298 | 1.00 | 0.00 |
| ATOM | 1128 | CG ARG   | 72 | -4.393 | 10.675 | 3.722 | 1.00 | 0.00 |
| ATOM | 1129 | HG2 ARG  | 72 | -3.461 | 10.689 | 4.286 | 1.00 | 0.00 |
| ATOM | 1130 | HG3 ARG  | 72 | -4.172 | 10.703 | 2.655 | 1.00 | 0.00 |
| ATOM | 1131 | CD ARG   | 72 | -5.232 | 11.889 | 4.098 | 1.00 | 0.00 |
| ATOM | 1132 | HD2 ARG  | 72 | -5.965 | 12.069 | 3.311 | 1.00 | 0.00 |
| ATOM | 1133 | HD3 ARG  | 72 | -5.749 | 11.683 | 5.035 | 1.00 | 0.00 |
| ATOM | 1134 | NE ARG   | 72 | -4.417 | 13.096 | 4.266 | 1.00 | 0.00 |
| ATOM | 1135 | HE ARG   | 72 | -4.464 | 13.783 | 3.528 | 1.00 | 0.00 |
| ATOM | 1136 | CZ ARG   | 72 | -3.624 | 13.333 | 5.303 | 1.00 | 0.00 |
| ATOM | 1137 | NH1 ARG  | 72 | -3.565 | 12.476 | 6.298 | 1.00 | 0.00 |
| ATOM | 1138 | HH11 ARG | 72 | -4.125 | 11.636 | 6.271 | 1.00 | 0.00 |
| ATOM | 1139 | HH12 ARG | 72 | -2.960 | 12.661 | 7.085 | 1.00 | 0.00 |
| ATOM | 1140 | NH2 ARG  | 72 | -2.909 | 14.428 | 5.344 | 1.00 | 0.00 |
| ATOM | 1141 | HH21 ARG | 72 | -2.963 | 15.091 | 4.584 | 1.00 | 0.00 |
| ATOM | 1142 | HH22 ARG | 72 | -2.307 | 14.604 | 6.135 | 1.00 | 0.00 |
| ATOM | 1143 | C ARG    | 72 | -5.372 | 8.547  | 6.378 | 1.00 | 0.00 |
| ATOM | 1144 | O ARG    | 72 | -4.967 | 8.889  | 7.481 | 1.00 | 0.00 |
| ATOM | 1145 | N VAL    | 73 | -6.637 | 8.180  | 6.112 | 1.00 | 0.00 |
| ATOM | 1146 | H VAL    | 73 | -6.911 | 8.026  | 5.152 | 1.00 | 0.00 |
| ATOM | 1147 | CA VAL   | 73 | -7.649 | 8.079  | 7.137 | 1.00 | 0.00 |
| ATOM | 1148 | HA VAL   | 73 | -7.933 | 9.048  | 7.547 | 1.00 | 0.00 |

|      |      |      |     |    |         |       |        |      |      |
|------|------|------|-----|----|---------|-------|--------|------|------|
| ATOM | 1149 | CB   | VAL | 73 | -8.897  | 7.407 | 6.564  | 1.00 | 0.00 |
| ATOM | 1150 | HB   | VAL | 73 | -9.067  | 7.802 | 5.563  | 1.00 | 0.00 |
| ATOM | 1151 | CG1  | VAL | 73 | -8.749  | 5.894 | 6.493  | 1.00 | 0.00 |
| ATOM | 1152 | HG11 | VAL | 73 | -8.579  | 5.497 | 7.494  | 1.00 | 0.00 |
| ATOM | 1153 | HG12 | VAL | 73 | -9.659  | 5.458 | 6.080  | 1.00 | 0.00 |
| ATOM | 1154 | HG13 | VAL | 73 | -7.903  | 5.640 | 5.854  | 1.00 | 0.00 |
| ATOM | 1155 | CG2  | VAL | 73 | -10.136 | 7.772 | 7.385  | 1.00 | 0.00 |
| ATOM | 1156 | HG21 | VAL | 73 | -10.279 | 8.852 | 7.367  | 1.00 | 0.00 |
| ATOM | 1157 | HG22 | VAL | 73 | -11.012 | 7.282 | 6.959  | 1.00 | 0.00 |
| ATOM | 1158 | HG23 | VAL | 73 | -10.001 | 7.441 | 8.415  | 1.00 | 0.00 |
| ATOM | 1159 | C    | VAL | 73 | -7.068  | 7.332 | 8.336  | 1.00 | 0.00 |
| ATOM | 1160 | O    | VAL | 73 | -6.102  | 6.569 | 8.213  | 1.00 | 0.00 |
| ATOM | 1161 | N    | GLN | 74 | -7.696  | 7.521 | 9.482  | 1.00 | 0.00 |
| ATOM | 1162 | H    | GLN | 74 | -8.471  | 8.166 | 9.537  | 1.00 | 0.00 |
| ATOM | 1163 | CA   | GLN | 74 | -7.252  | 6.876 | 10.700 | 1.00 | 0.00 |
| ATOM | 1164 | HA   | GLN | 74 | -7.268  | 5.793 | 10.571 | 1.00 | 0.00 |
| ATOM | 1165 | CB   | GLN | 74 | -5.822  | 7.307 | 11.046 | 1.00 | 0.00 |
| ATOM | 1166 | HB2  | GLN | 74 | -5.338  | 7.691 | 10.148 | 1.00 | 0.00 |
| ATOM | 1167 | HB3  | GLN | 74 | -5.859  | 8.091 | 11.802 | 1.00 | 0.00 |
| ATOM | 1168 | CG   | GLN | 74 | -5.025  | 6.114 | 11.585 | 1.00 | 0.00 |
| ATOM | 1169 | HG2  | GLN | 74 | -5.719  | 5.427 | 12.070 | 1.00 | 0.00 |
| ATOM | 1170 | HG3  | GLN | 74 | -4.518  | 5.600 | 10.768 | 1.00 | 0.00 |

|      |      |      |     |    |         |        |        |      |      |
|------|------|------|-----|----|---------|--------|--------|------|------|
| ATOM | 1171 | CD   | GLN | 74 | -3.983  | 6.553  | 12.604 | 1.00 | 0.00 |
| ATOM | 1172 | OE1  | GLN | 74 | -3.640  | 7.720  | 12.733 | 1.00 | 0.00 |
| ATOM | 1173 | NE2  | GLN | 74 | -3.452  | 5.586  | 13.330 | 1.00 | 0.00 |
| ATOM | 1174 | HE21 | GLN | 74 | -2.754  | 5.806  | 14.026 | 1.00 | 0.00 |
| ATOM | 1175 | HE22 | GLN | 74 | -3.747  | 4.630  | 13.186 | 1.00 | 0.00 |
| ATOM | 1176 | C    | GLN | 74 | -8.210  | 7.178  | 11.848 | 1.00 | 0.00 |
| ATOM | 1177 | O    | GLN | 74 | -7.814  | 7.354  | 12.994 | 1.00 | 0.00 |
| ATOM | 1178 | N    | GLY | 75 | -9.498  | 7.306  | 11.516 | 1.00 | 0.00 |
| ATOM | 1179 | H    | GLY | 75 | -9.779  | 7.201  | 10.551 | 1.00 | 0.00 |
| ATOM | 1180 | CA   | GLY | 75 | -10.519 | 7.593  | 12.501 | 1.00 | 0.00 |
| ATOM | 1181 | HA2  | GLY | 75 | -10.634 | 6.733  | 13.161 | 1.00 | 0.00 |
| ATOM | 1182 | HA3  | GLY | 75 | -10.220 | 8.462  | 13.086 | 1.00 | 0.00 |
| ATOM | 1183 | C    | GLY | 75 | -11.842 | 7.881  | 11.835 | 1.00 | 0.00 |
| ATOM | 1184 | O    | GLY | 75 | -12.830 | 7.205  | 12.105 | 1.00 | 0.00 |
| ATOM | 1185 | N    | GLN | 76 | -11.842 | 8.841  | 10.897 | 1.00 | 0.00 |
| ATOM | 1186 | H    | GLN | 76 | -10.990 | 9.347  | 10.704 | 1.00 | 0.00 |
| ATOM | 1187 | CA   | GLN | 76 | -13.044 | 9.224  | 10.186 | 1.00 | 0.00 |
| ATOM | 1188 | HA   | GLN | 76 | -13.356 | 8.405  | 9.538  | 1.00 | 0.00 |
| ATOM | 1189 | CB   | GLN | 76 | -14.189 | 9.547  | 11.154 | 1.00 | 0.00 |
| ATOM | 1190 | HB2  | GLN | 76 | -13.928 | 9.182  | 12.147 | 1.00 | 0.00 |
| ATOM | 1191 | HB3  | GLN | 76 | -14.331 | 10.627 | 11.189 | 1.00 | 0.00 |
| ATOM | 1192 | CG   | GLN | 76 | -15.485 | 8.878  | 10.689 | 1.00 | 0.00 |

|      |      |      |     |    |         |        |        |      |      |
|------|------|------|-----|----|---------|--------|--------|------|------|
| ATOM | 1193 | HG2  | GLN | 76 | -15.539 | 8.905  | 9.601  | 1.00 | 0.00 |
| ATOM | 1194 | HG3  | GLN | 76 | -15.512 | 7.842  | 11.027 | 1.00 | 0.00 |
| ATOM | 1195 | CD   | GLN | 76 | -16.693 | 9.604  | 11.253 | 1.00 | 0.00 |
| ATOM | 1196 | OE1  | GLN | 76 | -17.268 | 10.471 | 10.616 | 1.00 | 0.00 |
| ATOM | 1197 | NE2  | GLN | 76 | -17.065 | 9.239  | 12.463 | 1.00 | 0.00 |
| ATOM | 1198 | HE21 | GLN | 76 | -17.862 | 9.682  | 12.898 | 1.00 | 0.00 |
| ATOM | 1199 | HE22 | GLN | 76 | -16.552 | 8.518  | 12.950 | 1.00 | 0.00 |
| ATOM | 1200 | C    | GLN | 76 | -12.769 | 10.412 | 9.284  | 1.00 | 0.00 |
| ATOM | 1201 | O    | GLN | 76 | -12.590 | 11.539 | 9.733  | 1.00 | 0.00 |
| ATOM | 1202 | N    | HID | 77 | -12.652 | 10.144 | 7.985  | 1.00 | 0.00 |
| ATOM | 1203 | H    | HID | 77 | -12.636 | 9.181  | 7.681  | 1.00 | 0.00 |
| ATOM | 1204 | CA   | HID | 77 | -12.418 | 11.183 | 6.995  | 1.00 | 0.00 |
| ATOM | 1205 | HA   | HID | 77 | -12.587 | 12.167 | 7.432  | 1.00 | 0.00 |
| ATOM | 1206 | CB   | HID | 77 | -10.969 | 11.106 | 6.509  | 1.00 | 0.00 |
| ATOM | 1207 | HB2  | HID | 77 | -10.284 | 11.271 | 7.340  | 1.00 | 0.00 |
| ATOM | 1208 | HB3  | HID | 77 | -10.766 | 10.133 | 6.060  | 1.00 | 0.00 |
| ATOM | 1209 | CG   | HID | 77 | -10.638 | 12.139 | 5.466  | 1.00 | 0.00 |
| ATOM | 1210 | ND1  | HID | 77 | -10.018 | 13.341 | 5.731  | 1.00 | 0.00 |
| ATOM | 1211 | HD1  | HID | 77 | -9.724  | 13.663 | 6.642  | 1.00 | 0.00 |
| ATOM | 1212 | CE1  | HID | 77 | -9.873  | 14.009 | 4.570  | 1.00 | 0.00 |
| ATOM | 1213 | HE1  | HID | 77 | -9.392  | 14.987 | 4.555  | 1.00 | 0.00 |
| ATOM | 1214 | NE2  | HID | 77 | -10.397 | 13.269 | 3.578  | 1.00 | 0.00 |

|      |      |     |     |    |         |        |        |      |      |
|------|------|-----|-----|----|---------|--------|--------|------|------|
| ATOM | 1215 | CD2 | HID | 77 | -10.873 | 12.086 | 4.114  | 1.00 | 0.00 |
| ATOM | 1216 | HD2 | HID | 77 | -11.328 | 11.337 | 3.465  | 1.00 | 0.00 |
| ATOM | 1217 | C   | HID | 77 | -13.450 | 11.085 | 5.878  | 1.00 | 0.00 |
| ATOM | 1218 | O   | HID | 77 | -13.339 | 11.753 | 4.861  | 1.00 | 0.00 |
| ATOM | 1219 | N   | GLY | 78 | -14.459 | 10.233 | 6.063  | 1.00 | 0.00 |
| ATOM | 1220 | H   | GLY | 78 | -14.515 | 9.710  | 6.925  | 1.00 | 0.00 |
| ATOM | 1221 | CA  | GLY | 78 | -15.483 | 10.027 | 5.071  | 1.00 | 0.00 |
| ATOM | 1222 | HA2 | GLY | 78 | -16.148 | 9.230  | 5.406  | 1.00 | 0.00 |
| ATOM | 1223 | HA3 | GLY | 78 | -16.053 | 10.948 | 4.952  | 1.00 | 0.00 |
| ATOM | 1224 | C   | GLY | 78 | -14.880 | 9.636  | 3.720  | 1.00 | 0.00 |
| ATOM | 1225 | O   | GLY | 78 | -13.657 | 9.460  | 3.565  | 1.00 | 0.00 |
| ATOM | 1226 | N   | PRO | 79 | -15.757 | 9.434  | 2.736  | 1.00 | 0.00 |
| ATOM | 1227 | CD  | PRO | 79 | -17.204 | 9.562  | 2.837  | 1.00 | 0.00 |
| ATOM | 1228 | HD2 | PRO | 79 | -17.440 | 10.613 | 2.999  | 1.00 | 0.00 |
| ATOM | 1229 | HD3 | PRO | 79 | -17.536 | 8.979  | 3.696  | 1.00 | 0.00 |
| ATOM | 1230 | CG  | PRO | 79 | -17.768 | 9.029  | 1.516  | 1.00 | 0.00 |
| ATOM | 1231 | HG2 | PRO | 79 | -18.282 | 9.838  | 0.998  | 1.00 | 0.00 |
| ATOM | 1232 | HG3 | PRO | 79 | -18.476 | 8.228  | 1.730  | 1.00 | 0.00 |
| ATOM | 1233 | CB  | PRO | 79 | -16.581 | 8.506  | 0.698  | 1.00 | 0.00 |
| ATOM | 1234 | HB2 | PRO | 79 | -16.614 | 8.848  | -0.337 | 1.00 | 0.00 |
| ATOM | 1235 | HB3 | PRO | 79 | -16.549 | 7.416  | 0.719  | 1.00 | 0.00 |
| ATOM | 1236 | CA  | PRO | 79 | -15.348 | 9.077  | 1.395  | 1.00 | 0.00 |

|      |      |     |     |    |         |        |        |      |      |
|------|------|-----|-----|----|---------|--------|--------|------|------|
| ATOM | 1237 | HA  | PRO | 79 | -14.624 | 8.265  | 1.466  | 1.00 | 0.00 |
| ATOM | 1238 | C   | PRO | 79 | -14.725 | 10.245 | 0.655  | 1.00 | 0.00 |
| ATOM | 1239 | O   | PRO | 79 | -15.427 | 11.095 | 0.128  | 1.00 | 0.00 |
| ATOM | 1240 | N   | PHE | 80 | -13.387 | 10.284 | 0.630  | 1.00 | 0.00 |
| ATOM | 1241 | H   | PHE | 80 | -12.849 | 9.549  | 1.068  | 1.00 | 0.00 |
| ATOM | 1242 | CA  | PHE | 80 | -12.674 | 11.362 | -0.019 | 1.00 | 0.00 |
| ATOM | 1243 | HA  | PHE | 80 | -13.233 | 11.751 | -0.870 | 1.00 | 0.00 |
| ATOM | 1244 | CB  | PHE | 80 | -12.506 | 12.482 | 1.008  | 1.00 | 0.00 |
| ATOM | 1245 | HB2 | PHE | 80 | -13.350 | 12.489 | 1.698  | 1.00 | 0.00 |
| ATOM | 1246 | HB3 | PHE | 80 | -11.582 | 12.333 | 1.566  | 1.00 | 0.00 |
| ATOM | 1247 | CG  | PHE | 80 | -12.429 | 13.859 | 0.407  | 1.00 | 0.00 |
| ATOM | 1248 | CD1 | PHE | 80 | -13.599 | 14.500 | -0.022 | 1.00 | 0.00 |
| ATOM | 1249 | HD1 | PHE | 80 | -14.560 | 13.996 | 0.079  | 1.00 | 0.00 |
| ATOM | 1250 | CE1 | PHE | 80 | -13.536 | 15.787 | -0.581 | 1.00 | 0.00 |
| ATOM | 1251 | HE1 | PHE | 80 | -14.452 | 16.277 | -0.912 | 1.00 | 0.00 |
| ATOM | 1252 | CZ  | PHE | 80 | -12.303 | 16.441 | -0.715 | 1.00 | 0.00 |
| ATOM | 1253 | HZ  | PHE | 80 | -12.248 | 17.438 | -1.151 | 1.00 | 0.00 |
| ATOM | 1254 | CE2 | PHE | 80 | -11.133 | 15.799 | -0.282 | 1.00 | 0.00 |
| ATOM | 1255 | HE2 | PHE | 80 | -10.172 | 16.303 | -0.381 | 1.00 | 0.00 |
| ATOM | 1256 | CD2 | PHE | 80 | -11.197 | 14.513 | 0.277  | 1.00 | 0.00 |
| ATOM | 1257 | HD2 | PHE | 80 | -10.285 | 14.018 | 0.612  | 1.00 | 0.00 |
| ATOM | 1258 | C   | PHE | 80 | -11.311 | 10.896 | -0.497 | 1.00 | 0.00 |

|      |      |      |     |    |         |        |        |      |      |
|------|------|------|-----|----|---------|--------|--------|------|------|
| ATOM | 1259 | O    | PHE | 80 | -11.015 | 10.862 | -1.680 | 1.00 | 0.00 |
| ATOM | 1260 | N    | GLN | 81 | -10.463 | 10.499 | 0.460  | 1.00 | 0.00 |
| ATOM | 1261 | H    | GLN | 81 | -10.769 | 10.500 | 1.422  | 1.00 | 0.00 |
| ATOM | 1262 | CA   | GLN | 81 | -9.112  | 10.083 | 0.172  | 1.00 | 0.00 |
| ATOM | 1263 | HA   | GLN | 81 | -8.654  | 10.800 | -0.509 | 1.00 | 0.00 |
| ATOM | 1264 | CB   | GLN | 81 | -8.266  | 10.002 | 1.436  | 1.00 | 0.00 |
| ATOM | 1265 | HB2  | GLN | 81 | -8.620  | 9.166  | 2.040  | 1.00 | 0.00 |
| ATOM | 1266 | HB3  | GLN | 81 | -7.228  | 9.829  | 1.151  | 1.00 | 0.00 |
| ATOM | 1267 | CG   | GLN | 81 | -8.363  | 11.289 | 2.244  | 1.00 | 0.00 |
| ATOM | 1268 | HG2  | GLN | 81 | -7.509  | 11.916 | 1.988  | 1.00 | 0.00 |
| ATOM | 1269 | HG3  | GLN | 81 | -9.286  | 11.820 | 2.012  | 1.00 | 0.00 |
| ATOM | 1270 | CD   | GLN | 81 | -8.328  | 11.007 | 3.733  | 1.00 | 0.00 |
| ATOM | 1271 | OE1  | GLN | 81 | -8.652  | 9.944  | 4.230  | 1.00 | 0.00 |
| ATOM | 1272 | NE2  | GLN | 81 | -7.946  | 12.014 | 4.487  | 1.00 | 0.00 |
| ATOM | 1273 | HE21 | GLN | 81 | -7.898  | 11.900 | 5.489  | 1.00 | 0.00 |
| ATOM | 1274 | HE22 | GLN | 81 | -7.702  | 12.896 | 4.060  | 1.00 | 0.00 |
| ATOM | 1275 | C    | GLN | 81 | -9.181  | 8.743  | -0.483 | 1.00 | 0.00 |
| ATOM | 1276 | O    | GLN | 81 | -8.729  | 8.658  | -1.593 | 1.00 | 0.00 |
| ATOM | 1277 | N    | SER | 82 | -9.795  | 7.741  | 0.158  | 1.00 | 0.00 |
| ATOM | 1278 | H    | SER | 82 | -10.194 | 7.928  | 1.066  | 1.00 | 0.00 |
| ATOM | 1279 | CA   | SER | 82 | -9.913  | 6.398  | -0.382 | 1.00 | 0.00 |
| ATOM | 1280 | HA   | SER | 82 | -8.982  | 5.854  | -0.222 | 1.00 | 0.00 |



|      |      |      |     |    |         |        |        |      |      |
|------|------|------|-----|----|---------|--------|--------|------|------|
| ATOM | 1281 | CB   | SER | 82 | -11.045 | 5.640  | 0.304  | 1.00 | 0.00 |
| ATOM | 1282 | HB2  | SER | 82 | -10.782 | 5.527  | 1.355  | 1.00 | 0.00 |
| ATOM | 1283 | HB3  | SER | 82 | -11.949 | 6.242  | 0.219  | 1.00 | 0.00 |
| ATOM | 1284 | OG   | SER | 82 | -11.272 | 4.372  | -0.261 | 1.00 | 0.00 |
| ATOM | 1285 | HG   | SER | 82 | -11.991 | 3.938  | 0.204  | 1.00 | 0.00 |
| ATOM | 1286 | C    | SER | 82 | -10.198 | 6.444  | -1.866 | 1.00 | 0.00 |
| ATOM | 1287 | O    | SER | 82 | -9.495  | 5.820  | -2.617 | 1.00 | 0.00 |
| ATOM | 1288 | N    | THR | 83 | -11.135 | 7.290  | -2.282 | 1.00 | 0.00 |
| ATOM | 1289 | H    | THR | 83 | -11.702 | 7.765  | -1.594 | 1.00 | 0.00 |
| ATOM | 1290 | CA   | THR | 83 | -11.457 | 7.473  | -3.680 | 1.00 | 0.00 |
| ATOM | 1291 | HA   | THR | 83 | -12.036 | 6.606  | -3.999 | 1.00 | 0.00 |
| ATOM | 1292 | CB   | THR | 83 | -12.324 | 8.722  | -3.833 | 1.00 | 0.00 |
| ATOM | 1293 | HB   | THR | 83 | -12.149 | 9.349  | -2.959 | 1.00 | 0.00 |
| ATOM | 1294 | CG2  | THR | 83 | -12.027 | 9.520  | -5.099 | 1.00 | 0.00 |
| ATOM | 1295 | HG21 | THR | 83 | -12.202 | 8.893  | -5.974 | 1.00 | 0.00 |
| ATOM | 1296 | HG22 | THR | 83 | -12.680 | 10.392 | -5.141 | 1.00 | 0.00 |
| ATOM | 1297 | HG23 | THR | 83 | -10.987 | 9.845  | -5.088 | 1.00 | 0.00 |
| ATOM | 1298 | OG1  | THR | 83 | -13.639 | 8.266  | -3.957 | 1.00 | 0.00 |
| ATOM | 1299 | HG1  | THR | 83 | -14.230 | 9.016  | -4.057 | 1.00 | 0.00 |
| ATOM | 1300 | C    | THR | 83 | -10.202 | 7.510  | -4.542 | 1.00 | 0.00 |
| ATOM | 1301 | O    | THR | 83 | -9.877  | 6.549  | -5.241 | 1.00 | 0.00 |
| ATOM | 1302 | N    | ARG | 84 | -9.445  | 8.610  | -4.448 | 1.00 | 0.00 |

|      |      |      |     |    |        |        |         |      |      |
|------|------|------|-----|----|--------|--------|---------|------|------|
| ATOM | 1303 | H    | ARG | 84 | -9.725 | 9.352  | -3.824  | 1.00 | 0.00 |
| ATOM | 1304 | CA   | ARG | 84 | -8.248 | 8.784  | -5.217  | 1.00 | 0.00 |
| ATOM | 1305 | HA   | ARG | 84 | -8.445 | 8.538  | -6.261  | 1.00 | 0.00 |
| ATOM | 1306 | CB   | ARG | 84 | -7.756 | 10.230 | -5.140  | 1.00 | 0.00 |
| ATOM | 1307 | HB2  | ARG | 84 | -8.425 | 10.795 | -4.491  | 1.00 | 0.00 |
| ATOM | 1308 | HB3  | ARG | 84 | -6.750 | 10.238 | -4.720  | 1.00 | 0.00 |
| ATOM | 1309 | CG   | ARG | 84 | -7.733 | 10.871 | -6.533  | 1.00 | 0.00 |
| ATOM | 1310 | HG2  | ARG | 84 | -8.762 | 11.055 | -6.841  | 1.00 | 0.00 |
| ATOM | 1311 | HG3  | ARG | 84 | -7.199 | 11.819 | -6.464  | 1.00 | 0.00 |
| ATOM | 1312 | CD   | ARG | 84 | -7.045 | 9.972  | -7.565  | 1.00 | 0.00 |
| ATOM | 1313 | HD2  | ARG | 84 | -6.576 | 9.129  | -7.057  | 1.00 | 0.00 |
| ATOM | 1314 | HD3  | ARG | 84 | -7.785 | 9.601  | -8.275  | 1.00 | 0.00 |
| ATOM | 1315 | NE   | ARG | 84 | -6.010 | 10.712 | -8.306  | 1.00 | 0.00 |
| ATOM | 1316 | HE   | ARG | 84 | -5.678 | 11.560 | -7.869  | 1.00 | 0.00 |
| ATOM | 1317 | CZ   | ARG | 84 | -5.508 | 10.369 | -9.475  | 1.00 | 0.00 |
| ATOM | 1318 | NH1  | ARG | 84 | -5.969 | 9.316  | -10.109 | 1.00 | 0.00 |
| ATOM | 1319 | HH11 | ARG | 84 | -6.711 | 8.767  | -9.698  | 1.00 | 0.00 |
| ATOM | 1320 | HH12 | ARG | 84 | -5.580 | 9.059  | -11.005 | 1.00 | 0.00 |
| ATOM | 1321 | NH2  | ARG | 84 | -4.531 | 11.068 | -10.005 | 1.00 | 0.00 |
| ATOM | 1322 | HH21 | ARG | 84 | -4.164 | 11.870 | -9.514  | 1.00 | 0.00 |
| ATOM | 1323 | HH22 | ARG | 84 | -4.151 | 10.799 | -10.902 | 1.00 | 0.00 |
| ATOM | 1324 | C    | ARG | 84 | -7.177 | 7.869  | -4.698  | 1.00 | 0.00 |

|      |      |      |     |    |        |       |        |      |      |
|------|------|------|-----|----|--------|-------|--------|------|------|
| ATOM | 1325 | O    | ARG | 84 | -6.458 | 7.274 | -5.481 | 1.00 | 0.00 |
| ATOM | 1326 | N    | ILE | 85 | -7.012 | 7.800 | -3.385 | 1.00 | 0.00 |
| ATOM | 1327 | H    | ILE | 85 | -7.547 | 8.447 | -2.824 | 1.00 | 0.00 |
| ATOM | 1328 | CA   | ILE | 85 | -6.064 | 6.946 | -2.723 | 1.00 | 0.00 |
| ATOM | 1329 | HA   | ILE | 85 | -5.032 | 7.258 | -2.883 | 1.00 | 0.00 |
| ATOM | 1330 | CB   | ILE | 85 | -6.346 | 6.863 | -1.217 | 1.00 | 0.00 |
| ATOM | 1331 | HB   | ILE | 85 | -7.424 | 6.905 | -1.060 | 1.00 | 0.00 |
| ATOM | 1332 | CG2  | ILE | 85 | -5.798 | 5.569 | -0.629 | 1.00 | 0.00 |
| ATOM | 1333 | HG21 | ILE | 85 | -4.720 | 5.526 | -0.785 | 1.00 | 0.00 |
| ATOM | 1334 | HG22 | ILE | 85 | -6.011 | 5.535 | 0.439  | 1.00 | 0.00 |
| ATOM | 1335 | HG23 | ILE | 85 | -6.270 | 4.717 | -1.120 | 1.00 | 0.00 |
| ATOM | 1336 | CG1  | ILE | 85 | -5.804 | 8.105 | -0.488 | 1.00 | 0.00 |
| ATOM | 1337 | HG12 | ILE | 85 | -6.345 | 8.980 | -0.847 | 1.00 | 0.00 |
| ATOM | 1338 | HG13 | ILE | 85 | -5.980 | 7.983 | 0.581  | 1.00 | 0.00 |
| ATOM | 1339 | CD1  | ILE | 85 | -4.309 | 8.292 | -0.740 | 1.00 | 0.00 |
| ATOM | 1340 | HD11 | ILE | 85 | -4.133 | 8.414 | -1.809 | 1.00 | 0.00 |
| ATOM | 1341 | HD12 | ILE | 85 | -3.959 | 9.178 | -0.211 | 1.00 | 0.00 |
| ATOM | 1342 | HD13 | ILE | 85 | -3.767 | 7.417 | -0.381 | 1.00 | 0.00 |
| ATOM | 1343 | C    | ILE | 85 | -6.058 | 5.581 | -3.382 | 1.00 | 0.00 |
| ATOM | 1344 | O    | ILE | 85 | -5.004 | 4.999 | -3.533 | 1.00 | 0.00 |
| ATOM | 1345 | N    | TYR | 86 | -7.204 | 5.124 | -3.861 | 1.00 | 0.00 |
| ATOM | 1346 | H    | TYR | 86 | -8.019 | 5.710 | -3.751 | 1.00 | 0.00 |

|      |      |     |     |    |         |        |        |      |      |
|------|------|-----|-----|----|---------|--------|--------|------|------|
| ATOM | 1347 | CA  | TYR | 86 | -7.352  | 3.880  | -4.547 | 1.00 | 0.00 |
| ATOM | 1348 | HA  | TYR | 86 | -6.666  | 3.126  | -4.161 | 1.00 | 0.00 |
| ATOM | 1349 | CB  | TYR | 86 | -8.778  | 3.407  | -4.308 | 1.00 | 0.00 |
| ATOM | 1350 | HB2 | TYR | 86 | -9.398  | 4.302  | -4.268 | 1.00 | 0.00 |
| ATOM | 1351 | HB3 | TYR | 86 | -9.070  | 2.800  | -5.166 | 1.00 | 0.00 |
| ATOM | 1352 | CG  | TYR | 86 | -8.966  | 2.606  | -3.036 | 1.00 | 0.00 |
| ATOM | 1353 | CD1 | TYR | 86 | -8.654  | 3.165  | -1.785 | 1.00 | 0.00 |
| ATOM | 1354 | HD1 | TYR | 86 | -8.277  | 4.186  | -1.739 | 1.00 | 0.00 |
| ATOM | 1355 | CE1 | TYR | 86 | -8.822  | 2.425  | -0.605 | 1.00 | 0.00 |
| ATOM | 1356 | HE1 | TYR | 86 | -8.543  | 2.842  | 0.362  | 1.00 | 0.00 |
| ATOM | 1357 | CZ  | TYR | 86 | -9.307  | 1.112  | -0.689 | 1.00 | 0.00 |
| ATOM | 1358 | OH  | TYR | 86 | -9.519  | 0.419  | 0.455  | 1.00 | 0.00 |
| ATOM | 1359 | HH  | TYR | 86 | -9.305  | 0.922  | 1.244  | 1.00 | 0.00 |
| ATOM | 1360 | CE2 | TYR | 86 | -9.622  | 0.533  | -1.930 | 1.00 | 0.00 |
| ATOM | 1361 | HE2 | TYR | 86 | -10.000 | -0.488 | -1.989 | 1.00 | 0.00 |
| ATOM | 1362 | CD2 | TYR | 86 | -9.444  | 1.286  | -3.106 | 1.00 | 0.00 |
| ATOM | 1363 | HD2 | TYR | 86 | -9.677  | 0.845  | -4.076 | 1.00 | 0.00 |
| ATOM | 1364 | C   | TYR | 86 | -7.145  | 4.047  | -6.028 | 1.00 | 0.00 |
| ATOM | 1365 | O   | TYR | 86 | -6.478  | 3.245  | -6.662 | 1.00 | 0.00 |
| ATOM | 1366 | N   | GLN | 87 | -7.650  | 5.130  | -6.611 | 1.00 | 0.00 |
| ATOM | 1367 | H   | GLN | 87 | -8.210  | 5.758  | -6.052 | 1.00 | 0.00 |
| ATOM | 1368 | CA  | GLN | 87 | -7.482  | 5.427  | -8.009 | 1.00 | 0.00 |

|      |      |      |     |    |         |       |         |      |      |
|------|------|------|-----|----|---------|-------|---------|------|------|
| ATOM | 1369 | HA   | GLN | 87 | -7.812  | 4.578 | -8.608  | 1.00 | 0.00 |
| ATOM | 1370 | CB   | GLN | 87 | -8.306  | 6.649 | -8.400  | 1.00 | 0.00 |
| ATOM | 1371 | HB2  | GLN | 87 | -9.027  | 6.856 | -7.610  | 1.00 | 0.00 |
| ATOM | 1372 | HB3  | GLN | 87 | -7.638  | 7.503 | -8.515  | 1.00 | 0.00 |
| ATOM | 1373 | CG   | GLN | 87 | -9.048  | 6.402 | -9.715  | 1.00 | 0.00 |
| ATOM | 1374 | HG2  | GLN | 87 | -8.430  | 6.463 | -10.611 | 1.00 | 0.00 |
| ATOM | 1375 | HG3  | GLN | 87 | -9.423  | 5.385 | -9.602  | 1.00 | 0.00 |
| ATOM | 1376 | CD   | GLN | 87 | -10.234 | 7.343 | -9.876  | 1.00 | 0.00 |
| ATOM | 1377 | OE1  | GLN | 87 | -10.284 | 8.409 | -9.273  | 1.00 | 0.00 |
| ATOM | 1378 | NE2  | GLN | 87 | -11.100 | 7.009 | -10.798 | 1.00 | 0.00 |
| ATOM | 1379 | HE21 | GLN | 87 | -11.911 | 7.589 | -10.959 | 1.00 | 0.00 |
| ATOM | 1380 | HE22 | GLN | 87 | -10.953 | 6.172 | -11.345 | 1.00 | 0.00 |
| ATOM | 1381 | C    | GLN | 87 | -6.019  | 5.656 | -8.338  | 1.00 | 0.00 |
| ATOM | 1382 | O    | GLN | 87 | -5.644  | 5.754 | -9.500  | 1.00 | 0.00 |
| ATOM | 1383 | N    | ILE | 88 | -5.154  | 5.765 | -7.344  | 1.00 | 0.00 |
| ATOM | 1384 | H    | ILE | 88 | -5.527  | 5.771 | -6.405  | 1.00 | 0.00 |
| ATOM | 1385 | CA   | ILE | 88 | -3.741  | 5.947 | -7.516  | 1.00 | 0.00 |
| ATOM | 1386 | HA   | ILE | 88 | -3.465  | 5.947 | -8.571  | 1.00 | 0.00 |
| ATOM | 1387 | CB   | ILE | 88 | -3.315  | 7.270 | -6.877  | 1.00 | 0.00 |
| ATOM | 1388 | HB   | ILE | 88 | -3.658  | 7.288 | -5.843  | 1.00 | 0.00 |
| ATOM | 1389 | CG2  | ILE | 88 | -1.796  | 7.422 | -6.912  | 1.00 | 0.00 |
| ATOM | 1390 | HG21 | ILE | 88 | -1.452  | 7.404 | -7.946  | 1.00 | 0.00 |

|      |      |      |     |    |        |        |        |      |      |
|------|------|------|-----|----|--------|--------|--------|------|------|
| ATOM | 1391 | HG22 | ILE | 88 | -1.515 | 8.369  | -6.453 | 1.00 | 0.00 |
| ATOM | 1392 | HG23 | ILE | 88 | -1.335 | 6.601  | -6.362 | 1.00 | 0.00 |
| ATOM | 1393 | CG1  | ILE | 88 | -3.981 | 8.449  | -7.591 | 1.00 | 0.00 |
| ATOM | 1394 | HG12 | ILE | 88 | -3.438 | 8.664  | -8.511 | 1.00 | 0.00 |
| ATOM | 1395 | HG13 | ILE | 88 | -5.012 | 8.187  | -7.831 | 1.00 | 0.00 |
| ATOM | 1396 | CD1  | ILE | 88 | -3.966 | 9.689  | -6.686 | 1.00 | 0.00 |
| ATOM | 1397 | HD11 | ILE | 88 | -2.936 | 9.951  | -6.446 | 1.00 | 0.00 |
| ATOM | 1398 | HD12 | ILE | 88 | -4.442 | 10.522 | -7.203 | 1.00 | 0.00 |
| ATOM | 1399 | HD13 | ILE | 88 | -4.510 | 9.474  | -5.766 | 1.00 | 0.00 |
| ATOM | 1400 | C    | ILE | 88 | -3.016 | 4.755  | -6.926 | 1.00 | 0.00 |
| ATOM | 1401 | O    | ILE | 88 | -1.833 | 4.599  | -7.139 | 1.00 | 0.00 |
| ATOM | 1402 | N    | ALA | 89 | -3.716 | 3.894  | -6.208 | 1.00 | 0.00 |
| ATOM | 1403 | H    | ALA | 89 | -4.681 | 4.111  | -6.001 | 1.00 | 0.00 |
| ATOM | 1404 | CA   | ALA | 89 | -3.149 | 2.696  | -5.642 | 1.00 | 0.00 |
| ATOM | 1405 | HA   | ALA | 89 | -2.060 | 2.743  | -5.669 | 1.00 | 0.00 |
| ATOM | 1406 | CB   | ALA | 89 | -3.594 | 2.575  | -4.194 | 1.00 | 0.00 |
| ATOM | 1407 | HB1  | ALA | 89 | -4.682 | 2.517  | -4.151 | 1.00 | 0.00 |
| ATOM | 1408 | HB2  | ALA | 89 | -3.166 | 1.673  | -3.756 | 1.00 | 0.00 |
| ATOM | 1409 | HB3  | ALA | 89 | -3.255 | 3.447  | -3.635 | 1.00 | 0.00 |
| ATOM | 1410 | C    | ALA | 89 | -3.549 | 1.488  | -6.472 | 1.00 | 0.00 |
| ATOM | 1411 | O    | ALA | 89 | -3.213 | 0.354  | -6.143 | 1.00 | 0.00 |
| ATOM | 1412 | N    | LYS | 90 | -4.264 | 1.728  | -7.577 | 1.00 | 0.00 |

|      |      |     |     |    |        |        |         |      |      |
|------|------|-----|-----|----|--------|--------|---------|------|------|
| ATOM | 1413 | H   | LYS | 90 | -4.569 | 2.673  | -7.762  | 1.00 | 0.00 |
| ATOM | 1414 | CA  | LYS | 90 | -4.715 | 0.675  | -8.463  | 1.00 | 0.00 |
| ATOM | 1415 | HA  | LYS | 90 | -4.668 | -0.286 | -7.951  | 1.00 | 0.00 |
| ATOM | 1416 | CB  | LYS | 90 | -6.165 | 0.929  | -8.897  | 1.00 | 0.00 |
| ATOM | 1417 | HB2 | LYS | 90 | -6.682 | -0.031 | -8.913  | 1.00 | 0.00 |
| ATOM | 1418 | HB3 | LYS | 90 | -6.627 | 1.578  | -8.153  | 1.00 | 0.00 |
| ATOM | 1419 | CG  | LYS | 90 | -6.263 | 1.579  | -10.267 | 1.00 | 0.00 |
| ATOM | 1420 | HG2 | LYS | 90 | -5.680 | 0.988  | -10.974 | 1.00 | 0.00 |
| ATOM | 1421 | HG3 | LYS | 90 | -7.309 | 1.583  | -10.575 | 1.00 | 0.00 |
| ATOM | 1422 | CD  | LYS | 90 | -5.739 | 2.997  | -10.242 | 1.00 | 0.00 |
| ATOM | 1423 | HD2 | LYS | 90 | -6.424 | 3.615  | -9.661  | 1.00 | 0.00 |
| ATOM | 1424 | HD3 | LYS | 90 | -4.757 | 3.000  | -9.769  | 1.00 | 0.00 |
| ATOM | 1425 | CE  | LYS | 90 | -5.624 | 3.558  | -11.658 | 1.00 | 0.00 |
| ATOM | 1426 | HE2 | LYS | 90 | -5.199 | 2.789  | -12.304 | 1.00 | 0.00 |
| ATOM | 1427 | HE3 | LYS | 90 | -6.622 | 3.817  | -12.012 | 1.00 | 0.00 |
| ATOM | 1428 | NZ  | LYS | 90 | -4.766 | 4.755  | -11.689 | 1.00 | 0.00 |
| ATOM | 1429 | HZ1 | LYS | 90 | -3.841 | 4.515  | -11.362 | 1.00 | 0.00 |
| ATOM | 1430 | HZ2 | LYS | 90 | -4.708 | 5.103  | -12.635 | 1.00 | 0.00 |
| ATOM | 1431 | HZ3 | LYS | 90 | -5.160 | 5.467  | -11.092 | 1.00 | 0.00 |
| ATOM | 1432 | C   | LYS | 90 | -3.758 | 0.555  | -9.620  | 1.00 | 0.00 |
| ATOM | 1433 | O   | LYS | 90 | -3.776 | -0.419 | -10.354 | 1.00 | 0.00 |
| ATOM | 1434 | N   | ASN | 91 | -2.954 | 1.604  | -9.838  | 1.00 | 0.00 |

|      |      |      |     |    |        |        |         |      |      |
|------|------|------|-----|----|--------|--------|---------|------|------|
| ATOM | 1435 | H    | ASN | 91 | -3.051 | 2.419  | -9.250  | 1.00 | 0.00 |
| ATOM | 1436 | CA   | ASN | 91 | -1.972 | 1.633  | -10.885 | 1.00 | 0.00 |
| ATOM | 1437 | HA   | ASN | 91 | -2.293 | 0.996  | -11.710 | 1.00 | 0.00 |
| ATOM | 1438 | CB   | ASN | 91 | -1.789 | 3.058  | -11.410 | 1.00 | 0.00 |
| ATOM | 1439 | HB2  | ASN | 91 | -0.911 | 3.046  | -12.055 | 1.00 | 0.00 |
| ATOM | 1440 | HB3  | ASN | 91 | -2.658 | 3.376  | -11.986 | 1.00 | 0.00 |
| ATOM | 1441 | CG   | ASN | 91 | -1.558 | 4.049  | -10.301 | 1.00 | 0.00 |
| ATOM | 1442 | OD1  | ASN | 91 | -0.916 | 3.748  | -9.324  | 1.00 | 0.00 |
| ATOM | 1443 | ND2  | ASN | 91 | -2.143 | 5.222  | -10.453 | 1.00 | 0.00 |
| ATOM | 1444 | HD21 | ASN | 91 | -2.030 | 5.934  | -9.746  | 1.00 | 0.00 |
| ATOM | 1445 | HD22 | ASN | 91 | -2.701 | 5.401  | -11.276 | 1.00 | 0.00 |
| ATOM | 1446 | C    | ASN | 91 | -0.634 | 1.110  | -10.372 | 1.00 | 0.00 |
| ATOM | 1447 | O    | ASN | 91 | 0.362  | 1.145  | -11.086 | 1.00 | 0.00 |
| ATOM | 1448 | N    | LEU | 92 | -0.599 | 0.707  | -9.106  | 1.00 | 0.00 |
| ATOM | 1449 | H    | LEU | 92 | -1.418 | 0.836  | -8.529  | 1.00 | 0.00 |
| ATOM | 1450 | CA   | LEU | 92 | 0.583  | 0.157  | -8.498  | 1.00 | 0.00 |
| ATOM | 1451 | HA   | LEU | 92 | 1.455  | 0.752  | -8.768  | 1.00 | 0.00 |
| ATOM | 1452 | CB   | LEU | 92 | 0.435  | 0.168  | -6.970  | 1.00 | 0.00 |
| ATOM | 1453 | HB2  | LEU | 92 | -0.642 | 0.185  | -6.805  | 1.00 | 0.00 |
| ATOM | 1454 | HB3  | LEU | 92 | 0.853  | -0.745 | -6.545  | 1.00 | 0.00 |
| ATOM | 1455 | CG   | LEU | 92 | 1.075  | 1.386  | -6.294  | 1.00 | 0.00 |
| ATOM | 1456 | HG   | LEU | 92 | 0.893  | 2.270  | -6.905  | 1.00 | 0.00 |



|      |      |          |    |        |        |        |      |      |
|------|------|----------|----|--------|--------|--------|------|------|
| ATOM | 1457 | CD1 LEU  | 92 | 0.474  | 1.596  | -4.902 | 1.00 | 0.00 |
| ATOM | 1458 | HD11 LEU | 92 | 0.656  | 0.712  | -4.290 | 1.00 | 0.00 |
| ATOM | 1459 | HD12 LEU | 92 | 0.937  | 2.464  | -4.433 | 1.00 | 0.00 |
| ATOM | 1460 | HD13 LEU | 92 | -0.600 | 1.761  | -4.991 | 1.00 | 0.00 |
| ATOM | 1461 | CD2 LEU  | 92 | 2.591  | 1.242  | -6.225 | 1.00 | 0.00 |
| ATOM | 1462 | HD21 LEU | 92 | 2.994  | 1.151  | -7.234 | 1.00 | 0.00 |
| ATOM | 1463 | HD22 LEU | 92 | 3.018  | 2.120  | -5.741 | 1.00 | 0.00 |
| ATOM | 1464 | HD23 LEU | 92 | 2.846  | 0.351  | -5.651 | 1.00 | 0.00 |
| ATOM | 1465 | C LEU    | 92 | 0.839  | -1.242 | -9.028 | 1.00 | 0.00 |
| ATOM | 1466 | O LEU    | 92 | 1.921  | -1.501 | -9.513 | 1.00 | 0.00 |
| ATOM | 1467 | N PRO    | 93 | -0.177 | -2.119 | -9.017 | 1.00 | 0.00 |
| ATOM | 1468 | CD PRO   | 93 | -1.521 | -1.868 | -8.524 | 1.00 | 0.00 |
| ATOM | 1469 | HD2 PRO  | 93 | -1.982 | -1.138 | -9.189 | 1.00 | 0.00 |
| ATOM | 1470 | HD3 PRO  | 93 | -1.429 | -1.442 | -7.525 | 1.00 | 0.00 |
| ATOM | 1471 | CG PRO   | 93 | -2.252 | -3.193 | -8.521 | 1.00 | 0.00 |
| ATOM | 1472 | HG2 PRO  | 93 | -3.092 | -3.142 | -9.214 | 1.00 | 0.00 |
| ATOM | 1473 | HG3 PRO  | 93 | -2.623 | -3.397 | -7.517 | 1.00 | 0.00 |
| ATOM | 1474 | CB PRO   | 93 | -1.234 | -4.251 | -8.953 | 1.00 | 0.00 |
| ATOM | 1475 | HB2 PRO  | 93 | -1.645 | -4.926 | -9.704 | 1.00 | 0.00 |
| ATOM | 1476 | HB3 PRO  | 93 | -0.896 | -4.828 | -8.093 | 1.00 | 0.00 |
| ATOM | 1477 | CA PRO   | 93 | -0.065 | -3.465 | -9.546 | 1.00 | 0.00 |
| ATOM | 1478 | HA PRO   | 93 | 0.852  | -3.905 | -9.153 | 1.00 | 0.00 |

|      |      |      |     |    |        |        |         |      |      |
|------|------|------|-----|----|--------|--------|---------|------|------|
| ATOM | 1479 | C    | PRO | 93 | -0.030 | -3.495 | -11.064 | 1.00 | 0.00 |
| ATOM | 1480 | O    | PRO | 93 | 0.093  | -4.562 | -11.661 | 1.00 | 0.00 |
| ATOM | 1481 | N    | ASN | 94 | -0.137 | -2.312 | -11.674 | 1.00 | 0.00 |
| ATOM | 1482 | H    | ASN | 94 | -0.240 | -1.473 | -11.121 | 1.00 | 0.00 |
| ATOM | 1483 | CA   | ASN | 94 | -0.106 | -2.186 | -13.101 | 1.00 | 0.00 |
| ATOM | 1484 | HA   | ASN | 94 | -0.543 | -3.071 | -13.564 | 1.00 | 0.00 |
| ATOM | 1485 | CB   | ASN | 94 | -0.911 | -0.960 | -13.535 | 1.00 | 0.00 |
| ATOM | 1486 | HB2  | ASN | 94 | -0.681 | -0.125 | -12.874 | 1.00 | 0.00 |
| ATOM | 1487 | HB3  | ASN | 94 | -0.631 | -0.702 | -14.556 | 1.00 | 0.00 |
| ATOM | 1488 | CG   | ASN | 94 | -2.400 | -1.215 | -13.492 | 1.00 | 0.00 |
| ATOM | 1489 | OD1  | ASN | 94 | -2.876 | -2.335 | -13.425 | 1.00 | 0.00 |
| ATOM | 1490 | ND2  | ASN | 94 | -3.157 | -0.133 | -13.524 | 1.00 | 0.00 |
| ATOM | 1491 | HD21 | ASN | 94 | -4.163 | -0.223 | -13.499 | 1.00 | 0.00 |
| ATOM | 1492 | HD22 | ASN | 94 | -2.727 | 0.779  | -13.574 | 1.00 | 0.00 |
| ATOM | 1493 | C    | ASN | 94 | 1.323  | -2.023 | -13.577 | 1.00 | 0.00 |
| ATOM | 1494 | O    | ASN | 94 | 1.710  | -2.566 | -14.604 | 1.00 | 0.00 |
| ATOM | 1495 | N    | VAL | 95 | 2.105  | -1.250 | -12.821 | 1.00 | 0.00 |
| ATOM | 1496 | H    | VAL | 95 | 1.709  | -0.771 | -12.025 | 1.00 | 0.00 |
| ATOM | 1497 | CA   | VAL | 95 | 3.498  | -1.010 | -13.144 | 1.00 | 0.00 |
| ATOM | 1498 | HA   | VAL | 95 | 3.759  | -1.375 | -14.138 | 1.00 | 0.00 |
| ATOM | 1499 | CB   | VAL | 95 | 3.787  | 0.491  | -13.082 | 1.00 | 0.00 |
| ATOM | 1500 | HB   | VAL | 95 | 3.652  | 0.831  | -12.055 | 1.00 | 0.00 |

|      |      |          |    |       |        |         |      |      |
|------|------|----------|----|-------|--------|---------|------|------|
| ATOM | 1501 | CG1 VAL  | 95 | 5.214 | 0.793  | -13.535 | 1.00 | 0.00 |
| ATOM | 1502 | HG11 VAL | 95 | 5.349 | 0.453  | -14.562 | 1.00 | 0.00 |
| ATOM | 1503 | HG12 VAL | 95 | 5.393 | 1.866  | -13.481 | 1.00 | 0.00 |
| ATOM | 1504 | HG13 VAL | 95 | 5.919 | 0.274  | -12.886 | 1.00 | 0.00 |
| ATOM | 1505 | CG2 VAL  | 95 | 2.785 | 1.269  | -13.947 | 1.00 | 0.00 |
| ATOM | 1506 | HG21 VAL | 95 | 1.773 | 1.088  | -13.583 | 1.00 | 0.00 |
| ATOM | 1507 | HG22 VAL | 95 | 3.006 | 2.334  | -13.891 | 1.00 | 0.00 |
| ATOM | 1508 | HG23 VAL | 95 | 2.863 | 0.936  | -14.982 | 1.00 | 0.00 |
| ATOM | 1509 | C VAL    | 95 | 4.395 | -1.801 | -12.204 | 1.00 | 0.00 |
| ATOM | 1510 | O VAL    | 95 | 5.602 | -1.867 | -12.386 | 1.00 | 0.00 |
| ATOM | 1511 | N CYX    | 96 | 3.790 | -2.460 | -11.220 | 1.00 | 0.00 |
| ATOM | 1512 | H CYX    | 96 | 2.793 | -2.348 | -11.108 | 1.00 | 0.00 |
| ATOM | 1513 | CA CYX   | 96 | 4.499 | -3.252 | -10.255 | 1.00 | 0.00 |
| ATOM | 1514 | HA CYX   | 96 | 5.538 | -3.348 | -10.570 | 1.00 | 0.00 |
| ATOM | 1515 | CB CYX   | 96 | 4.467 | -2.627 | -8.860  | 1.00 | 0.00 |
| ATOM | 1516 | HB2 CYX  | 96 | 3.464 | -2.719 | -8.443  | 1.00 | 0.00 |
| ATOM | 1517 | HB3 CYX  | 96 | 5.177 | -3.143 | -8.214  | 1.00 | 0.00 |
| ATOM | 1518 | SG CYX   | 96 | 4.888 | -0.892 | -8.825  | 1.00 | 0.00 |
| ATOM | 1519 | C CYX    | 96 | 3.919 | -4.628 | -10.275 | 1.00 | 0.00 |
| ATOM | 1520 | O CYX    | 96 | 3.793 | -5.162 | -9.199  | 1.00 | 0.00 |
| ATOM | 1521 | N ASN    | 97 | 3.542 | -5.151 | -11.453 | 1.00 | 0.00 |
| ATOM | 1522 | H ASN    | 97 | 3.671 | -4.585 | -12.279 | 1.00 | 0.00 |

|      |      |      |     |    |       |        |         |      |      |
|------|------|------|-----|----|-------|--------|---------|------|------|
| ATOM | 1523 | CA   | ASN | 97 | 2.965 | -6.469 | -11.608 | 1.00 | 0.00 |
| ATOM | 1524 | HA   | ASN | 97 | 1.878 | -6.394 | -11.633 | 1.00 | 0.00 |
| ATOM | 1525 | CB   | ASN | 97 | 3.439 | -7.117 | -12.909 | 1.00 | 0.00 |
| ATOM | 1526 | HB2  | ASN | 97 | 4.421 | -6.736 | -13.189 | 1.00 | 0.00 |
| ATOM | 1527 | HB3  | ASN | 97 | 3.501 | -8.193 | -12.744 | 1.00 | 0.00 |
| ATOM | 1528 | CG   | ASN | 97 | 2.483 | -6.859 | -14.041 | 1.00 | 0.00 |
| ATOM | 1529 | OD1  | ASN | 97 | 1.752 | -7.729 | -14.484 | 1.00 | 0.00 |
| ATOM | 1530 | ND2  | ASN | 97 | 2.473 | -5.623 | -14.490 | 1.00 | 0.00 |
| ATOM | 1531 | HD21 | ASN | 97 | 1.857 | -5.370 | -15.250 | 1.00 | 0.00 |
| ATOM | 1532 | HD22 | ASN | 97 | 3.081 | -4.933 | -14.073 | 1.00 | 0.00 |
| ATOM | 1533 | C    | ASN | 97 | 3.361 | -7.388 | -10.454 | 1.00 | 0.00 |
| ATOM | 1534 | O    | ASN | 97 | 4.464 | -7.935 | -10.448 | 1.00 | 0.00 |
| ATOM | 1535 | N    | MET | 98 | 2.492 | -7.467 | -9.449  | 1.00 | 0.00 |
| ATOM | 1536 | H    | MET | 98 | 1.617 | -6.965 | -9.501  | 1.00 | 0.00 |
| ATOM | 1537 | CA   | MET | 98 | 2.792 | -8.197 | -8.238  | 1.00 | 0.00 |
| ATOM | 1538 | HA   | MET | 98 | 3.640 | -8.858 | -8.420  | 1.00 | 0.00 |
| ATOM | 1539 | CB   | MET | 98 | 3.141 | -7.262 | -7.082  | 1.00 | 0.00 |
| ATOM | 1540 | HB2  | MET | 98 | 3.480 | -7.862 | -6.237  | 1.00 | 0.00 |
| ATOM | 1541 | HB3  | MET | 98 | 3.943 | -6.596 | -7.400  | 1.00 | 0.00 |
| ATOM | 1542 | CG   | MET | 98 | 1.930 | -6.435 | -6.664  | 1.00 | 0.00 |
| ATOM | 1543 | HG2  | MET | 98 | 1.066 | -6.784 | -7.229  | 1.00 | 0.00 |
| ATOM | 1544 | HG3  | MET | 98 | 1.756 | -6.596 | -5.600  | 1.00 | 0.00 |

|      |      |     |     |    |        |         |         |      |      |
|------|------|-----|-----|----|--------|---------|---------|------|------|
| ATOM | 1545 | SD  | MET | 98 | 2.163  | -4.690  | -6.964  | 1.00 | 0.00 |
| ATOM | 1546 | CE  | MET | 98 | 0.830  | -3.995  | -6.030  | 1.00 | 0.00 |
| ATOM | 1547 | HE1 | MET | 98 | 0.938  | -4.272  | -4.981  | 1.00 | 0.00 |
| ATOM | 1548 | HE2 | MET | 98 | 0.848  | -2.909  | -6.123  | 1.00 | 0.00 |
| ATOM | 1549 | HE3 | MET | 98 | -0.118 | -4.376  | -6.410  | 1.00 | 0.00 |
| ATOM | 1550 | C   | MET | 98 | 1.617  | -9.078  | -7.895  | 1.00 | 0.00 |
| ATOM | 1551 | O   | MET | 98 | 1.546  | -9.646  | -6.815  | 1.00 | 0.00 |
| ATOM | 1552 | N   | LYS | 99 | 0.633  | -9.158  | -8.799  | 1.00 | 0.00 |
| ATOM | 1553 | H   | LYS | 99 | 0.680  | -8.549  | -9.604  | 1.00 | 0.00 |
| ATOM | 1554 | CA  | LYS | 99 | -0.556 | -9.942  | -8.607  | 1.00 | 0.00 |
| ATOM | 1555 | HA  | LYS | 99 | -0.356 | -10.768 | -7.924  | 1.00 | 0.00 |
| ATOM | 1556 | CB  | LYS | 99 | -1.664 | -9.065  | -8.005  | 1.00 | 0.00 |
| ATOM | 1557 | HB2 | LYS | 99 | -1.594 | -9.116  | -6.919  | 1.00 | 0.00 |
| ATOM | 1558 | HB3 | LYS | 99 | -1.507 | -8.037  | -8.331  | 1.00 | 0.00 |
| ATOM | 1559 | CG  | LYS | 99 | -3.056 | -9.536  | -8.450  | 1.00 | 0.00 |
| ATOM | 1560 | HG2 | LYS | 99 | -2.991 | -10.570 | -8.790  | 1.00 | 0.00 |
| ATOM | 1561 | HG3 | LYS | 99 | -3.740 | -9.475  | -7.604  | 1.00 | 0.00 |
| ATOM | 1562 | CD  | LYS | 99 | -3.579 | -8.649  | -9.599  | 1.00 | 0.00 |
| ATOM | 1563 | HD2 | LYS | 99 | -4.296 | -7.937  | -9.191  | 1.00 | 0.00 |
| ATOM | 1564 | HD3 | LYS | 99 | -2.738 | -8.109  | -10.033 | 1.00 | 0.00 |
| ATOM | 1565 | CE  | LYS | 99 | -4.262 | -9.498  | -10.690 | 1.00 | 0.00 |
| ATOM | 1566 | HE2 | LYS | 99 | -4.099 | -10.552 | -10.463 | 1.00 | 0.00 |

|      |      |      |     |     |        |         |         |      |      |
|------|------|------|-----|-----|--------|---------|---------|------|------|
| ATOM | 1567 | HE3  | LYS | 99  | -5.331 | -9.285  | -10.678 | 1.00 | 0.00 |
| ATOM | 1568 | NZ   | LYS | 99  | -3.714 | -9.192  | -12.029 | 1.00 | 0.00 |
| ATOM | 1569 | HZ1  | LYS | 99  | -2.724 | -9.390  | -12.041 | 1.00 | 0.00 |
| ATOM | 1570 | HZ2  | LYS | 99  | -4.179 | -9.762  | -12.721 | 1.00 | 0.00 |
| ATOM | 1571 | HZ3  | LYS | 99  | -3.865 | -8.216  | -12.240 | 1.00 | 0.00 |
| ATOM | 1572 | C    | LYS | 99  | -0.892 | -10.633 | -9.909  | 1.00 | 0.00 |
| ATOM | 1573 | O    | LYS | 99  | -1.581 | -10.100 | -10.755 | 1.00 | 0.00 |
| ATOM | 1574 | N    | GLN | 100 | -0.387 | -11.825 | -10.118 | 1.00 | 0.00 |
| ATOM | 1575 | H    | GLN | 100 | 0.256  | -12.230 | -9.453  | 1.00 | 0.00 |
| ATOM | 1576 | CA   | GLN | 100 | -0.683 | -12.566 | -11.322 | 1.00 | 0.00 |
| ATOM | 1577 | HA   | GLN | 100 | -0.615 | -11.913 | -12.192 | 1.00 | 0.00 |
| ATOM | 1578 | CB   | GLN | 100 | 0.325  | -13.709 | -11.487 | 1.00 | 0.00 |
| ATOM | 1579 | HB2  | GLN | 100 | 1.234  | -13.466 | -10.937 | 1.00 | 0.00 |
| ATOM | 1580 | HB3  | GLN | 100 | -0.107 | -14.627 | -11.087 | 1.00 | 0.00 |
| ATOM | 1581 | CG   | GLN | 100 | 0.663  | -13.907 | -12.969 | 1.00 | 0.00 |
| ATOM | 1582 | HG2  | GLN | 100 | 0.796  | -12.915 | -13.400 | 1.00 | 0.00 |
| ATOM | 1583 | HG3  | GLN | 100 | 1.585  | -14.478 | -13.080 | 1.00 | 0.00 |
| ATOM | 1584 | CD   | GLN | 100 | -0.447 | -14.623 | -13.729 | 1.00 | 0.00 |
| ATOM | 1585 | OE1  | GLN | 100 | -1.507 | -14.932 | -13.223 | 1.00 | 0.00 |
| ATOM | 1586 | NE2  | GLN | 100 | -0.183 | -14.941 | -14.974 | 1.00 | 0.00 |
| ATOM | 1587 | HE21 | GLN | 100 | -0.880 | -15.417 | -15.529 | 1.00 | 0.00 |
| ATOM | 1588 | HE22 | GLN | 100 | 0.716  | -14.709 | -15.372 | 1.00 | 0.00 |

|      |      |      |     |     |        |         |         |      |      |
|------|------|------|-----|-----|--------|---------|---------|------|------|
| ATOM | 1589 | C    | GLN | 100 | -2.107 | -13.097 | -11.284 | 1.00 | 0.00 |
| ATOM | 1590 | O    | GLN | 100 | -2.868 | -12.886 | -12.221 | 1.00 | 0.00 |
| ATOM | 1591 | N    | ILE | 101 | -2.458 | -13.740 | -10.170 | 1.00 | 0.00 |
| ATOM | 1592 | H    | ILE | 101 | -1.760 | -13.929 | -9.465  | 1.00 | 0.00 |
| ATOM | 1593 | CA   | ILE | 101 | -3.775 | -14.290 | -9.990  | 1.00 | 0.00 |
| ATOM | 1594 | HA   | ILE | 101 | -4.084 | -14.903 | -10.837 | 1.00 | 0.00 |
| ATOM | 1595 | CB   | ILE | 101 | -3.853 | -15.124 | -8.698  | 1.00 | 0.00 |
| ATOM | 1596 | HB   | ILE | 101 | -3.427 | -16.109 | -8.888  | 1.00 | 0.00 |
| ATOM | 1597 | CG2  | ILE | 101 | -3.084 | -14.447 | -7.574  | 1.00 | 0.00 |
| ATOM | 1598 | HG21 | ILE | 101 | -3.510 | -13.462 | -7.384  | 1.00 | 0.00 |
| ATOM | 1599 | HG22 | ILE | 101 | -3.152 | -15.053 | -6.671  | 1.00 | 0.00 |
| ATOM | 1600 | HG23 | ILE | 101 | -2.038 | -14.341 | -7.862  | 1.00 | 0.00 |
| ATOM | 1601 | CG1  | ILE | 101 | -5.308 | -15.399 | -8.284  | 1.00 | 0.00 |
| ATOM | 1602 | HG12 | ILE | 101 | -5.327 | -16.259 | -7.614  | 1.00 | 0.00 |
| ATOM | 1603 | HG13 | ILE | 101 | -5.697 | -14.525 | -7.763  | 1.00 | 0.00 |
| ATOM | 1604 | CD1  | ILE | 101 | -6.177 | -15.690 | -9.514  | 1.00 | 0.00 |
| ATOM | 1605 | HD11 | ILE | 101 | -5.788 | -16.565 | -10.035 | 1.00 | 0.00 |
| ATOM | 1606 | HD12 | ILE | 101 | -7.202 | -15.882 | -9.198  | 1.00 | 0.00 |
| ATOM | 1607 | HD13 | ILE | 101 | -6.159 | -14.831 | -10.184 | 1.00 | 0.00 |
| ATOM | 1608 | C    | ILE | 101 | -4.806 | -13.159 | -10.053 | 1.00 | 0.00 |
| ATOM | 1609 | O    | ILE | 101 | -5.330 | -12.825 | -11.110 | 1.00 | 0.00 |
| ATOM | 1610 | N    | GLY | 102 | -5.105 | -12.544 | -8.904  | 1.00 | 0.00 |

|      |      |      |     |     |        |         |        |      |      |
|------|------|------|-----|-----|--------|---------|--------|------|------|
| ATOM | 1611 | H    | GLY | 102 | -4.612 | -12.810 | -8.063 | 1.00 | 0.00 |
| ATOM | 1612 | CA   | GLY | 102 | -6.103 | -11.515 | -8.812 | 1.00 | 0.00 |
| ATOM | 1613 | HA2  | GLY | 102 | -5.636 | -10.553 | -9.023 | 1.00 | 0.00 |
| ATOM | 1614 | HA3  | GLY | 102 | -6.879 | -11.712 | -9.552 | 1.00 | 0.00 |
| ATOM | 1615 | C    | GLY | 102 | -6.731 | -11.465 | -7.446 | 1.00 | 0.00 |
| ATOM | 1616 | O    | GLY | 102 | -7.829 | -11.931 | -7.211 | 1.00 | 0.00 |
| ATOM | 1617 | N    | THR | 103 | -6.018 | -10.873 | -6.508 | 1.00 | 0.00 |
| ATOM | 1618 | H    | THR | 103 | -5.102 | -10.526 | -6.753 | 1.00 | 0.00 |
| ATOM | 1619 | CA   | THR | 103 | -6.451 | -10.762 | -5.120 | 1.00 | 0.00 |
| ATOM | 1620 | HA   | THR | 103 | -7.009 | -11.674 | -4.906 | 1.00 | 0.00 |
| ATOM | 1621 | CB   | THR | 103 | -5.211 | -10.725 | -4.223 | 1.00 | 0.00 |
| ATOM | 1622 | HB   | THR | 103 | -5.227 | -9.796  | -3.654 | 1.00 | 0.00 |
| ATOM | 1623 | CG2  | THR | 103 | -5.174 | -11.910 | -3.261 | 1.00 | 0.00 |
| ATOM | 1624 | HG21 | THR | 103 | -5.158 | -12.840 | -3.830 | 1.00 | 0.00 |
| ATOM | 1625 | HG22 | THR | 103 | -4.279 | -11.848 | -2.642 | 1.00 | 0.00 |
| ATOM | 1626 | HG23 | THR | 103 | -6.058 | -11.890 | -2.624 | 1.00 | 0.00 |
| ATOM | 1627 | OG1  | THR | 103 | -4.059 | -10.902 | -5.047 | 1.00 | 0.00 |
| ATOM | 1628 | HG1  | THR | 103 | -3.269 | -10.882 | -4.502 | 1.00 | 0.00 |
| ATOM | 1629 | C    | THR | 103 | -7.330 | -9.538  | -4.954 | 1.00 | 0.00 |
| ATOM | 1630 | O    | THR | 103 | -8.448 | -9.635  | -4.450 | 1.00 | 0.00 |
| ATOM | 1631 | N    | CYX | 104 | -6.842 | -8.379  | -5.417 | 1.00 | 0.00 |
| ATOM | 1632 | H    | CYX | 104 | -5.883 | -8.342  | -5.732 | 1.00 | 0.00 |



|      |      |     |     |     |         |        |         |      |      |
|------|------|-----|-----|-----|---------|--------|---------|------|------|
| ATOM | 1633 | CA  | CYX | 104 | -7.604  | -7.146 | -5.388  | 1.00 | 0.00 |
| ATOM | 1634 | HA  | CYX | 104 | -8.643  | -7.358 | -5.136  | 1.00 | 0.00 |
| ATOM | 1635 | CB  | CYX | 104 | -7.030  | -6.191 | -4.337  | 1.00 | 0.00 |
| ATOM | 1636 | HB2 | CYX | 104 | -7.753  | -5.403 | -4.128  | 1.00 | 0.00 |
| ATOM | 1637 | HB3 | CYX | 104 | -6.820  | -6.743 | -3.421  | 1.00 | 0.00 |
| ATOM | 1638 | SG  | CYX | 104 | -5.455  | -5.344 | -4.753  | 1.00 | 0.00 |
| ATOM | 1639 | C   | CYX | 104 | -7.640  | -6.544 | -6.785  | 1.00 | 0.00 |
| ATOM | 1640 | O   | CYX | 104 | -7.029  | -5.517 | -7.054  | 1.00 | 0.00 |
| ATOM | 1641 | N   | PRO | 105 | -8.306  | -7.221 | -7.722  | 1.00 | 0.00 |
| ATOM | 1642 | CD  | PRO | 105 | -9.039  | -8.461 | -7.525  | 1.00 | 0.00 |
| ATOM | 1643 | HD2 | PRO | 105 | -9.890  | -8.246 | -6.878  | 1.00 | 0.00 |
| ATOM | 1644 | HD3 | PRO | 105 | -8.374  | -9.167 | -7.027  | 1.00 | 0.00 |
| ATOM | 1645 | CG  | PRO | 105 | -9.463  | -8.940 | -8.911  | 1.00 | 0.00 |
| ATOM | 1646 | HG2 | PRO | 105 | -10.552 | -8.956 | -8.965  | 1.00 | 0.00 |
| ATOM | 1647 | HG3 | PRO | 105 | -9.078  | -9.947 | -9.074  | 1.00 | 0.00 |
| ATOM | 1648 | CB  | PRO | 105 | -8.867  | -7.957 | -9.921  | 1.00 | 0.00 |
| ATOM | 1649 | HB2 | PRO | 105 | -9.592  | -7.647 | -10.673 | 1.00 | 0.00 |
| ATOM | 1650 | HB3 | PRO | 105 | -8.001  | -8.399 | -10.413 | 1.00 | 0.00 |
| ATOM | 1651 | CA  | PRO | 105 | -8.435  | -6.752 | -9.088  | 1.00 | 0.00 |
| ATOM | 1652 | HA  | PRO | 105 | -7.443  | -6.472 | -9.443  | 1.00 | 0.00 |
| ATOM | 1653 | C   | PRO | 105 | -9.372  | -5.559 | -9.207  | 1.00 | 0.00 |
| ATOM | 1654 | O   | PRO | 105 | -10.320 | -5.562 | -9.982  | 1.00 | 0.00 |

|      |      |     |     |     |         |        |        |      |      |
|------|------|-----|-----|-----|---------|--------|--------|------|------|
| ATOM | 1655 | N   | PHE | 106 | -9.123  | -4.534 | -8.402 | 1.00 | 0.00 |
| ATOM | 1656 | H   | PHE | 106 | -8.323  | -4.583 | -7.788 | 1.00 | 0.00 |
| ATOM | 1657 | CA  | PHE | 106 | -9.929  | -3.347 | -8.376 | 1.00 | 0.00 |
| ATOM | 1658 | HA  | PHE | 106 | -10.965 | -3.570 | -8.632 | 1.00 | 0.00 |
| ATOM | 1659 | CB  | PHE | 106 | -9.887  | -2.788 | -6.958 | 1.00 | 0.00 |
| ATOM | 1660 | HB2 | PHE | 106 | -10.819 | -2.285 | -6.701 | 1.00 | 0.00 |
| ATOM | 1661 | HB3 | PHE | 106 | -9.719  | -3.615 | -6.268 | 1.00 | 0.00 |
| ATOM | 1662 | CG  | PHE | 106 | -8.772  | -1.787 | -6.716 | 1.00 | 0.00 |
| ATOM | 1663 | CD1 | PHE | 106 | -7.448  | -2.220 | -6.553 | 1.00 | 0.00 |
| ATOM | 1664 | HD1 | PHE | 106 | -7.226  | -3.287 | -6.598 | 1.00 | 0.00 |
| ATOM | 1665 | CE1 | PHE | 106 | -6.419  | -1.301 | -6.335 | 1.00 | 0.00 |
| ATOM | 1666 | HE1 | PHE | 106 | -5.387  | -1.639 | -6.236 | 1.00 | 0.00 |
| ATOM | 1667 | CZ  | PHE | 106 | -6.720  | 0.057  | -6.245 | 1.00 | 0.00 |
| ATOM | 1668 | HZ  | PHE | 106 | -5.933  | 0.772  | -6.007 | 1.00 | 0.00 |
| ATOM | 1669 | CE2 | PHE | 106 | -8.029  | 0.503  | -6.459 | 1.00 | 0.00 |
| ATOM | 1670 | HE2 | PHE | 106 | -8.248  | 1.570  | -6.442 | 1.00 | 0.00 |
| ATOM | 1671 | CD2 | PHE | 106 | -9.053  | -0.415 | -6.694 | 1.00 | 0.00 |
| ATOM | 1672 | HD2 | PHE | 106 | -10.072 | -0.065 | -6.861 | 1.00 | 0.00 |
| ATOM | 1673 | C   | PHE | 106 | -9.393  | -2.314 | -9.320 | 1.00 | 0.00 |
| ATOM | 1674 | O   | PHE | 106 | -8.196  | -2.347 | -9.596 | 1.00 | 0.00 |
| ATOM | 1675 | N   | ILE | 107 | -10.254 | -1.389 | -9.747 | 1.00 | 0.00 |
| ATOM | 1676 | H   | ILE | 107 | -11.214 | -1.440 | -9.438 | 1.00 | 0.00 |

|      |      |      |     |     |         |        |         |      |      |
|------|------|------|-----|-----|---------|--------|---------|------|------|
| ATOM | 1677 | CA   | ILE | 107 | -9.890  | -0.350 | -10.693 | 1.00 | 0.00 |
| ATOM | 1678 | HA   | ILE | 107 | -9.282  | 0.428  | -10.232 | 1.00 | 0.00 |
| ATOM | 1679 | CB   | ILE | 107 | -9.145  | -0.927 | -11.917 | 1.00 | 0.00 |
| ATOM | 1680 | HB   | ILE | 107 | -9.459  | -0.386 | -12.810 | 1.00 | 0.00 |
| ATOM | 1681 | CG2  | ILE | 107 | -7.625  | -0.785 | -11.740 | 1.00 | 0.00 |
| ATOM | 1682 | HG21 | ILE | 107 | -7.311  | -1.327 | -10.848 | 1.00 | 0.00 |
| ATOM | 1683 | HG22 | ILE | 107 | -7.117  | -1.197 | -12.612 | 1.00 | 0.00 |
| ATOM | 1684 | HG23 | ILE | 107 | -7.368  | 0.269  | -11.635 | 1.00 | 0.00 |
| ATOM | 1685 | CG1  | ILE | 107 | -9.545  | -2.394 | -12.192 | 1.00 | 0.00 |
| ATOM | 1686 | HG12 | ILE | 107 | -8.834  | -3.048 | -11.686 | 1.00 | 0.00 |
| ATOM | 1687 | HG13 | ILE | 107 | -10.543 | -2.562 | -11.788 | 1.00 | 0.00 |
| ATOM | 1688 | CD1  | ILE | 107 | -9.543  | -2.698 | -13.670 | 1.00 | 0.00 |
| ATOM | 1689 | HD11 | ILE | 107 | -8.545  | -2.531 | -14.075 | 1.00 | 0.00 |
| ATOM | 1690 | HD12 | ILE | 107 | -9.829  | -3.738 | -13.828 | 1.00 | 0.00 |
| ATOM | 1691 | HD13 | ILE | 107 | -10.254 | -2.046 | -14.177 | 1.00 | 0.00 |
| ATOM | 1692 | C    | ILE | 107 | -11.122 | 0.411  | -11.131 | 1.00 | 0.00 |
| ATOM | 1693 | O    | ILE | 107 | -11.039 | 1.624  | -11.266 | 1.00 | 0.00 |
| ATOM | 1694 | N    | ALA | 108 | -12.237 | -0.298 | -11.343 | 1.00 | 0.00 |
| ATOM | 1695 | H    | ALA | 108 | -12.191 | -1.306 | -11.292 | 1.00 | 0.00 |
| ATOM | 1696 | CA   | ALA | 108 | -13.492 | 0.312  | -11.718 | 1.00 | 0.00 |
| ATOM | 1697 | HA   | ALA | 108 | -13.331 | 1.031  | -12.521 | 1.00 | 0.00 |
| ATOM | 1698 | CB   | ALA | 108 | -14.447 | -0.771 | -12.217 | 1.00 | 0.00 |

|      |      |      |     |     |         |        |         |      |      |
|------|------|------|-----|-----|---------|--------|---------|------|------|
| ATOM | 1699 | HB1  | ALA | 108 | -14.626 | -1.494 | -11.421 | 1.00 | 0.00 |
| ATOM | 1700 | HB2  | ALA | 108 | -15.392 | -0.315 | -12.512 | 1.00 | 0.00 |
| ATOM | 1701 | HB3  | ALA | 108 | -14.006 | -1.278 | -13.075 | 1.00 | 0.00 |
| ATOM | 1702 | C    | ALA | 108 | -14.075 | 1.094  | -10.542 | 1.00 | 0.00 |
| ATOM | 1703 | O    | ALA | 108 | -15.114 | 0.735  | -10.001 | 1.00 | 0.00 |
| ATOM | 1704 | N    | ILE | 109 | -13.386 | 2.148  | -10.134 | 1.00 | 0.00 |
| ATOM | 1705 | H    | ILE | 109 | -12.500 | 2.316  | -10.588 | 1.00 | 0.00 |
| ATOM | 1706 | CA   | ILE | 109 | -13.748 | 2.979  | -9.009  | 1.00 | 0.00 |
| ATOM | 1707 | HA   | ILE | 109 | -14.795 | 2.858  | -8.729  | 1.00 | 0.00 |
| ATOM | 1708 | CB   | ILE | 109 | -12.855 | 2.695  | -7.789  | 1.00 | 0.00 |
| ATOM | 1709 | HB   | ILE | 109 | -12.721 | 3.618  | -7.226  | 1.00 | 0.00 |
| ATOM | 1710 | CG2  | ILE | 109 | -13.499 | 1.633  | -6.884  | 1.00 | 0.00 |
| ATOM | 1711 | HG21 | ILE | 109 | -13.633 | 0.709  | -7.446  | 1.00 | 0.00 |
| ATOM | 1712 | HG22 | ILE | 109 | -12.853 | 1.445  | -6.027  | 1.00 | 0.00 |
| ATOM | 1713 | HG23 | ILE | 109 | -14.468 | 1.990  | -6.537  | 1.00 | 0.00 |
| ATOM | 1714 | CG1  | ILE | 109 | -11.430 | 2.285  | -8.188  | 1.00 | 0.00 |
| ATOM | 1715 | HG12 | ILE | 109 | -10.897 | 1.951  | -7.298  | 1.00 | 0.00 |
| ATOM | 1716 | HG13 | ILE | 109 | -11.487 | 1.466  | -8.905  | 1.00 | 0.00 |
| ATOM | 1717 | CD1  | ILE | 109 | -10.686 | 3.457  | -8.815  | 1.00 | 0.00 |
| ATOM | 1718 | HD11 | ILE | 109 | -10.628 | 4.276  | -8.099  | 1.00 | 0.00 |
| ATOM | 1719 | HD12 | ILE | 109 | -9.679  | 3.143  | -9.090  | 1.00 | 0.00 |
| ATOM | 1720 | HD13 | ILE | 109 | -11.218 | 3.791  | -9.706  | 1.00 | 0.00 |

|      |      |     |     |     |         |         |        |      |      |
|------|------|-----|-----|-----|---------|---------|--------|------|------|
| ATOM | 1721 | C   | ILE | 109 | -13.752 | 4.454   | -9.440 | 1.00 | 0.00 |
| ATOM | 1722 | O   | ILE | 109 | -14.779 | 5.114   | -9.254 | 1.00 | 0.00 |
| ATOM | 1723 | OXT | ILE | 109 | -12.739 | 4.949   | -9.968 | 1.00 | 0.00 |
| TER  |      |     |     |     |         |         |        |      |      |
| ATOM | 1724 | S1  | LIG | 110 | 20.756  | -8.510  | -8.217 | 1.00 | 0.00 |
| ATOM | 1725 | O1  | LIG | 110 | 20.927  | -9.884  | -7.373 | 1.00 | 0.00 |
| ATOM | 1726 | O2  | LIG | 110 | 22.108  | -8.645  | -9.090 | 1.00 | 0.00 |
| ATOM | 1727 | H26 | LIG | 110 | 22.877  | -8.441  | -8.535 | 1.00 | 0.00 |
| ATOM | 1728 | O3  | LIG | 110 | 19.659  | -8.627  | -9.145 | 1.00 | 0.00 |
| ATOM | 1729 | O4  | LIG | 110 | 20.869  | -7.383  | -7.314 | 1.00 | 0.00 |
| ATOM | 1730 | C1  | LIG | 110 | 18.704  | -15.171 | -2.513 | 1.00 | 0.00 |
| ATOM | 1731 | H1  | LIG | 110 | 18.901  | -15.939 | -3.272 | 1.00 | 0.00 |
| ATOM | 1732 | H2  | LIG | 110 | 19.641  | -15.048 | -1.954 | 1.00 | 0.00 |
| ATOM | 1733 | C2  | LIG | 110 | 17.611  | -15.669 | -1.561 | 1.00 | 0.00 |
| ATOM | 1734 | H3  | LIG | 110 | 16.674  | -15.792 | -2.119 | 1.00 | 0.00 |
| ATOM | 1735 | H4  | LIG | 110 | 17.413  | -14.900 | -0.803 | 1.00 | 0.00 |
| ATOM | 1736 | C3  | LIG | 110 | 18.354  | -13.851 | -3.209 | 1.00 | 0.00 |
| ATOM | 1737 | H5  | LIG | 110 | 18.159  | -13.082 | -2.450 | 1.00 | 0.00 |
| ATOM | 1738 | H6  | LIG | 110 | 17.416  | -13.974 | -3.766 | 1.00 | 0.00 |
| ATOM | 1739 | C4  | LIG | 110 | 17.959  | -16.989 | -0.863 | 1.00 | 0.00 |
| ATOM | 1740 | H7  | LIG | 110 | 18.896  | -16.865 | -0.303 | 1.00 | 0.00 |
| ATOM | 1741 | H8  | LIG | 110 | 18.158  | -17.757 | -1.620 | 1.00 | 0.00 |

|      |      |     |     |     |        |         |        |      |      |
|------|------|-----|-----|-----|--------|---------|--------|------|------|
| ATOM | 1742 | C5  | LIG | 110 | 19.446 | -13.354 | -4.164 | 1.00 | 0.00 |
| ATOM | 1743 | H9  | LIG | 110 | 20.385 | -13.233 | -3.609 | 1.00 | 0.00 |
| ATOM | 1744 | H10 | LIG | 110 | 19.639 | -14.120 | -4.925 | 1.00 | 0.00 |
| ATOM | 1745 | C6  | LIG | 110 | 16.866 | -17.488 | 0.089  | 1.00 | 0.00 |
| ATOM | 1746 | H11 | LIG | 110 | 15.929 | -17.610 | -0.470 | 1.00 | 0.00 |
| ATOM | 1747 | H12 | LIG | 110 | 16.667 | -16.719 | 0.847  | 1.00 | 0.00 |
| ATOM | 1748 | C7  | LIG | 110 | 19.094 | -12.033 | -4.856 | 1.00 | 0.00 |
| ATOM | 1749 | H13 | LIG | 110 | 18.154 | -12.154 | -5.409 | 1.00 | 0.00 |
| ATOM | 1750 | H14 | LIG | 110 | 18.906 | -11.265 | -4.094 | 1.00 | 0.00 |
| ATOM | 1751 | C8  | LIG | 110 | 17.213 | -18.807 | 0.787  | 1.00 | 0.00 |
| ATOM | 1752 | H15 | LIG | 110 | 17.411 | -19.577 | 0.030  | 1.00 | 0.00 |
| ATOM | 1753 | H16 | LIG | 110 | 18.150 | -18.685 | 1.346  | 1.00 | 0.00 |
| ATOM | 1754 | C9  | LIG | 110 | 20.192 | -11.549 | -5.813 | 1.00 | 0.00 |
| ATOM | 1755 | H17 | LIG | 110 | 20.371 | -12.300 | -6.589 | 1.00 | 0.00 |
| ATOM | 1756 | H18 | LIG | 110 | 21.133 | -11.418 | -5.268 | 1.00 | 0.00 |
| ATOM | 1757 | C10 | LIG | 110 | 16.120 | -19.307 | 1.739  | 1.00 | 0.00 |
| ATOM | 1758 | H19 | LIG | 110 | 15.184 | -19.429 | 1.181  | 1.00 | 0.00 |
| ATOM | 1759 | H20 | LIG | 110 | 15.924 | -18.538 | 2.497  | 1.00 | 0.00 |
| ATOM | 1760 | C11 | LIG | 110 | 19.821 | -10.237 | -6.477 | 1.00 | 0.00 |
| ATOM | 1761 | H21 | LIG | 110 | 18.912 | -10.330 | -7.077 | 1.00 | 0.00 |
| ATOM | 1762 | H22 | LIG | 110 | 19.697 | -9.433  | -5.748 | 1.00 | 0.00 |
| ATOM | 1763 | C12 | LIG | 110 | 16.477 | -20.626 | 2.431  | 1.00 | 0.00 |

|      |      |     |     |     |        |         |        |      |      |
|------|------|-----|-----|-----|--------|---------|--------|------|------|
| ATOM | 1764 | H23 | LIG | 110 | 17.391 | -20.526 | 3.026  | 1.00 | 0.00 |
| ATOM | 1765 | H24 | LIG | 110 | 15.679 | -20.953 | 3.103  | 1.00 | 0.00 |
| ATOM | 1766 | H25 | LIG | 110 | 16.644 | -21.423 | 1.701  | 1.00 | 0.00 |
| TER  |      |     |     |     |        |         |        |      |      |
| ATOM | 1767 | S1  | LIG | 111 | 17.036 | -11.130 | 26.543 | 1.00 | 0.00 |
| ATOM | 1768 | O1  | LIG | 111 | 16.242 | -10.699 | 25.196 | 1.00 | 0.00 |
| ATOM | 1769 | O2  | LIG | 111 | 16.152 | -10.262 | 27.579 | 1.00 | 0.00 |
| ATOM | 1770 | H26 | LIG | 111 | 16.386 | -9.325  | 27.503 | 1.00 | 0.00 |
| ATOM | 1771 | O3  | LIG | 111 | 16.783 | -12.515 | 26.851 | 1.00 | 0.00 |
| ATOM | 1772 | O4  | LIG | 111 | 18.383 | -10.598 | 26.488 | 1.00 | 0.00 |
| ATOM | 1773 | C1  | LIG | 111 | 14.711 | -11.006 | 17.843 | 1.00 | 0.00 |
| ATOM | 1774 | H1  | LIG | 111 | 13.653 | -11.177 | 18.079 | 1.00 | 0.00 |
| ATOM | 1775 | H2  | LIG | 111 | 14.835 | -9.918  | 17.774 | 1.00 | 0.00 |
| ATOM | 1776 | C2  | LIG | 111 | 15.034 | -11.638 | 16.484 | 1.00 | 0.00 |
| ATOM | 1777 | H3  | LIG | 111 | 14.910 | -12.727 | 16.552 | 1.00 | 0.00 |
| ATOM | 1778 | H4  | LIG | 111 | 16.093 | -11.468 | 16.248 | 1.00 | 0.00 |
| ATOM | 1779 | C3  | LIG | 111 | 15.577 | -11.542 | 18.988 | 1.00 | 0.00 |
| ATOM | 1780 | H5  | LIG | 111 | 16.636 | -11.369 | 18.753 | 1.00 | 0.00 |
| ATOM | 1781 | H6  | LIG | 111 | 15.455 | -12.631 | 19.055 | 1.00 | 0.00 |
| ATOM | 1782 | C4  | LIG | 111 | 14.169 | -11.103 | 15.336 | 1.00 | 0.00 |
| ATOM | 1783 | H7  | LIG | 111 | 14.294 | -10.015 | 15.267 | 1.00 | 0.00 |
| ATOM | 1784 | H8  | LIG | 111 | 13.111 | -11.272 | 15.572 | 1.00 | 0.00 |

|      |      |     |     |     |        |         |        |      |      |
|------|------|-----|-----|-----|--------|---------|--------|------|------|
| ATOM | 1785 | C5  | LIG | 111 | 15.252 | -10.913 | 20.348 | 1.00 | 0.00 |
| ATOM | 1786 | H9  | LIG | 111 | 15.372 | -9.824  | 20.281 | 1.00 | 0.00 |
| ATOM | 1787 | H10 | LIG | 111 | 14.195 | -11.089 | 20.585 | 1.00 | 0.00 |
| ATOM | 1788 | C6  | LIG | 111 | 14.492 | -11.735 | 13.978 | 1.00 | 0.00 |
| ATOM | 1789 | H11 | LIG | 111 | 14.368 | -12.823 | 14.047 | 1.00 | 0.00 |
| ATOM | 1790 | H12 | LIG | 111 | 15.551 | -11.566 | 13.741 | 1.00 | 0.00 |
| ATOM | 1791 | C7  | LIG | 111 | 16.122 | -11.449 | 21.490 | 1.00 | 0.00 |
| ATOM | 1792 | H13 | LIG | 111 | 16.003 | -12.538 | 21.554 | 1.00 | 0.00 |
| ATOM | 1793 | H14 | LIG | 111 | 17.179 | -11.268 | 21.254 | 1.00 | 0.00 |
| ATOM | 1794 | C8  | LIG | 111 | 13.628 | -11.201 | 12.830 | 1.00 | 0.00 |
| ATOM | 1795 | H15 | LIG | 111 | 12.568 | -11.371 | 13.064 | 1.00 | 0.00 |
| ATOM | 1796 | H16 | LIG | 111 | 13.751 | -10.112 | 12.761 | 1.00 | 0.00 |
| ATOM | 1797 | C9  | LIG | 111 | 15.783 | -10.816 | 22.846 | 1.00 | 0.00 |
| ATOM | 1798 | H17 | LIG | 111 | 14.736 | -11.009 | 23.100 | 1.00 | 0.00 |
| ATOM | 1799 | H18 | LIG | 111 | 15.906 | -9.729  | 22.793 | 1.00 | 0.00 |
| ATOM | 1800 | C10 | LIG | 111 | 13.949 | -11.832 | 11.470 | 1.00 | 0.00 |
| ATOM | 1801 | H19 | LIG | 111 | 13.826 | -12.920 | 11.541 | 1.00 | 0.00 |
| ATOM | 1802 | H20 | LIG | 111 | 15.007 | -11.661 | 11.235 | 1.00 | 0.00 |
| ATOM | 1803 | C11 | LIG | 111 | 16.664 | -11.358 | 23.955 | 1.00 | 0.00 |
| ATOM | 1804 | H21 | LIG | 111 | 16.538 | -12.436 | 24.081 | 1.00 | 0.00 |
| ATOM | 1805 | H22 | LIG | 111 | 17.719 | -11.130 | 23.785 | 1.00 | 0.00 |
| ATOM | 1806 | C12 | LIG | 111 | 13.079 | -11.292 | 10.331 | 1.00 | 0.00 |



|      |      |     |     |     |         |         |         |      |      |
|------|------|-----|-----|-----|---------|---------|---------|------|------|
| ATOM | 1807 | H23 | LIG | 111 | 13.207  | -10.211 | 10.215  | 1.00 | 0.00 |
| ATOM | 1808 | H24 | LIG | 111 | 13.335  | -11.760 | 9.377   | 1.00 | 0.00 |
| ATOM | 1809 | H25 | LIG | 111 | 12.018  | -11.480 | 10.520  | 1.00 | 0.00 |
| TER  |      |     |     |     |         |         |         |      |      |
| ATOM | 1810 | S1  | LIG | 112 | -19.419 | 18.689  | -26.943 | 1.00 | 0.00 |
| ATOM | 1811 | O1  | LIG | 112 | -19.642 | 18.067  | -25.462 | 1.00 | 0.00 |
| ATOM | 1812 | O2  | LIG | 112 | -18.663 | 17.413  | -27.581 | 1.00 | 0.00 |
| ATOM | 1813 | H26 | LIG | 112 | -17.755 | 17.369  | -27.245 | 1.00 | 0.00 |
| ATOM | 1814 | O3  | LIG | 112 | -20.680 | 18.804  | -27.632 | 1.00 | 0.00 |
| ATOM | 1815 | O4  | LIG | 112 | -18.499 | 19.805  | -26.853 | 1.00 | 0.00 |
| ATOM | 1816 | C1  | LIG | 112 | -22.329 | 18.085  | -18.441 | 1.00 | 0.00 |
| ATOM | 1817 | H1  | LIG | 112 | -22.778 | 17.100  | -18.619 | 1.00 | 0.00 |
| ATOM | 1818 | H2  | LIG | 112 | -21.319 | 17.893  | -18.056 | 1.00 | 0.00 |
| ATOM | 1819 | C2  | LIG | 112 | -23.142 | 18.826  | -17.373 | 1.00 | 0.00 |
| ATOM | 1820 | H3  | LIG | 112 | -24.152 | 19.018  | -17.757 | 1.00 | 0.00 |
| ATOM | 1821 | H4  | LIG | 112 | -22.693 | 19.812  | -17.195 | 1.00 | 0.00 |
| ATOM | 1822 | C3  | LIG | 112 | -22.228 | 18.843  | -19.769 | 1.00 | 0.00 |
| ATOM | 1823 | H5  | LIG | 112 | -21.776 | 19.828  | -19.591 | 1.00 | 0.00 |
| ATOM | 1824 | H6  | LIG | 112 | -23.238 | 19.037  | -20.152 | 1.00 | 0.00 |
| ATOM | 1825 | C4  | LIG | 112 | -23.244 | 18.070  | -16.043 | 1.00 | 0.00 |
| ATOM | 1826 | H7  | LIG | 112 | -22.233 | 17.879  | -15.658 | 1.00 | 0.00 |
| ATOM | 1827 | H8  | LIG | 112 | -23.691 | 17.084  | -16.221 | 1.00 | 0.00 |

|      |      |     |     |     |         |        |         |      |      |
|------|------|-----|-----|-----|---------|--------|---------|------|------|
| ATOM | 1828 | C5  | LIG | 112 | -21.417 | 18.101 | -20.837 | 1.00 | 0.00 |
| ATOM | 1829 | H9  | LIG | 112 | -20.407 | 17.904 | -20.455 | 1.00 | 0.00 |
| ATOM | 1830 | H10 | LIG | 112 | -21.870 | 17.118 | -21.019 | 1.00 | 0.00 |
| ATOM | 1831 | C6  | LIG | 112 | -24.057 | 18.811 | -14.976 | 1.00 | 0.00 |
| ATOM | 1832 | H11 | LIG | 112 | -25.067 | 19.003 | -15.361 | 1.00 | 0.00 |
| ATOM | 1833 | H12 | LIG | 112 | -23.609 | 19.797 | -14.798 | 1.00 | 0.00 |
| ATOM | 1834 | C7  | LIG | 112 | -21.316 | 18.863 | -22.163 | 1.00 | 0.00 |
| ATOM | 1835 | H13 | LIG | 112 | -22.326 | 19.061 | -22.544 | 1.00 | 0.00 |
| ATOM | 1836 | H14 | LIG | 112 | -20.858 | 19.843 | -21.982 | 1.00 | 0.00 |
| ATOM | 1837 | C8  | LIG | 112 | -24.159 | 18.056 | -13.646 | 1.00 | 0.00 |
| ATOM | 1838 | H15 | LIG | 112 | -24.609 | 17.069 | -13.823 | 1.00 | 0.00 |
| ATOM | 1839 | H16 | LIG | 112 | -23.149 | 17.863 | -13.261 | 1.00 | 0.00 |
| ATOM | 1840 | C9  | LIG | 112 | -20.507 | 18.107 | -23.226 | 1.00 | 0.00 |
| ATOM | 1841 | H17 | LIG | 112 | -20.969 | 17.135 | -23.429 | 1.00 | 0.00 |
| ATOM | 1842 | H18 | LIG | 112 | -19.495 | 17.911 | -22.858 | 1.00 | 0.00 |
| ATOM | 1843 | C10 | LIG | 112 | -24.973 | 18.795 | -12.578 | 1.00 | 0.00 |
| ATOM | 1844 | H19 | LIG | 112 | -25.982 | 18.988 | -12.963 | 1.00 | 0.00 |
| ATOM | 1845 | H20 | LIG | 112 | -24.523 | 19.780 | -12.400 | 1.00 | 0.00 |
| ATOM | 1846 | C11 | LIG | 112 | -20.417 | 18.887 | -24.524 | 1.00 | 0.00 |
| ATOM | 1847 | H21 | LIG | 112 | -21.404 | 19.063 | -24.959 | 1.00 | 0.00 |
| ATOM | 1848 | H22 | LIG | 112 | -19.900 | 19.840 | -24.390 | 1.00 | 0.00 |
| ATOM | 1849 | C12 | LIG | 112 | -25.069 | 18.032 | -11.254 | 1.00 | 0.00 |

|      |      |     |     |     |         |         |         |      |      |
|------|------|-----|-----|-----|---------|---------|---------|------|------|
| ATOM | 1850 | H23 | LIG | 112 | -24.077 | 17.854  | -10.827 | 1.00 | 0.00 |
| ATOM | 1851 | H24 | LIG | 112 | -25.654 | 18.586  | -10.514 | 1.00 | 0.00 |
| ATOM | 1852 | H25 | LIG | 112 | -25.548 | 17.058  | -11.392 | 1.00 | 0.00 |
| TER  |      |     |     |     |         |         |         |      |      |
| ATOM | 1853 | S1  | LIG | 113 | -23.363 | -23.592 | -11.157 | 1.00 | 0.00 |
| ATOM | 1854 | O1  | LIG | 113 | -22.498 | -22.827 | -12.296 | 1.00 | 0.00 |
| ATOM | 1855 | O2  | LIG | 113 | -24.788 | -23.523 | -11.913 | 1.00 | 0.00 |
| ATOM | 1856 | H26 | LIG | 113 | -25.143 | -22.622 | -11.859 | 1.00 | 0.00 |
| ATOM | 1857 | O3  | LIG | 113 | -22.997 | -24.986 | -11.103 | 1.00 | 0.00 |
| ATOM | 1858 | O4  | LIG | 113 | -23.404 | -22.772 | -9.963  | 1.00 | 0.00 |
| ATOM | 1859 | C1  | LIG | 113 | -16.152 | -20.238 | -15.383 | 1.00 | 0.00 |
| ATOM | 1860 | H1  | LIG | 113 | -16.405 | -20.755 | -16.317 | 1.00 | 0.00 |
| ATOM | 1861 | H2  | LIG | 113 | -16.598 | -19.239 | -15.458 | 1.00 | 0.00 |
| ATOM | 1862 | C2  | LIG | 113 | -14.628 | -20.103 | -15.277 | 1.00 | 0.00 |
| ATOM | 1863 | H3  | LIG | 113 | -14.181 | -21.103 | -15.202 | 1.00 | 0.00 |
| ATOM | 1864 | H4  | LIG | 113 | -14.374 | -19.587 | -14.342 | 1.00 | 0.00 |
| ATOM | 1865 | C3  | LIG | 113 | -16.782 | -20.987 | -14.204 | 1.00 | 0.00 |
| ATOM | 1866 | H5  | LIG | 113 | -16.531 | -20.468 | -13.269 | 1.00 | 0.00 |
| ATOM | 1867 | H6  | LIG | 113 | -16.333 | -21.986 | -14.128 | 1.00 | 0.00 |
| ATOM | 1868 | C4  | LIG | 113 | -13.994 | -19.354 | -16.455 | 1.00 | 0.00 |
| ATOM | 1869 | H7  | LIG | 113 | -14.441 | -18.353 | -16.529 | 1.00 | 0.00 |
| ATOM | 1870 | H8  | LIG | 113 | -14.249 | -19.869 | -17.390 | 1.00 | 0.00 |

|      |      |     |     |     |         |         |         |      |      |
|------|------|-----|-----|-----|---------|---------|---------|------|------|
| ATOM | 1871 | C5  | LIG | 113 | -18.305 | -21.125 | -14.310 | 1.00 | 0.00 |
| ATOM | 1872 | H9  | LIG | 113 | -18.755 | -20.127 | -14.389 | 1.00 | 0.00 |
| ATOM | 1873 | H10 | LIG | 113 | -18.558 | -21.647 | -15.242 | 1.00 | 0.00 |
| ATOM | 1874 | C6  | LIG | 113 | -12.471 | -19.219 | -16.350 | 1.00 | 0.00 |
| ATOM | 1875 | H11 | LIG | 113 | -12.025 | -20.219 | -16.275 | 1.00 | 0.00 |
| ATOM | 1876 | H12 | LIG | 113 | -12.217 | -18.703 | -15.415 | 1.00 | 0.00 |
| ATOM | 1877 | C7  | LIG | 113 | -18.933 | -21.871 | -13.128 | 1.00 | 0.00 |
| ATOM | 1878 | H13 | LIG | 113 | -18.481 | -22.868 | -13.049 | 1.00 | 0.00 |
| ATOM | 1879 | H14 | LIG | 113 | -18.685 | -21.346 | -12.197 | 1.00 | 0.00 |
| ATOM | 1880 | C8  | LIG | 113 | -11.837 | -18.470 | -17.527 | 1.00 | 0.00 |
| ATOM | 1881 | H15 | LIG | 113 | -12.090 | -18.986 | -18.464 | 1.00 | 0.00 |
| ATOM | 1882 | H16 | LIG | 113 | -12.284 | -17.470 | -17.603 | 1.00 | 0.00 |
| ATOM | 1883 | C9  | LIG | 113 | -20.457 | -22.008 | -13.250 | 1.00 | 0.00 |
| ATOM | 1884 | H17 | LIG | 113 | -20.714 | -22.550 | -14.166 | 1.00 | 0.00 |
| ATOM | 1885 | H18 | LIG | 113 | -20.917 | -21.017 | -13.322 | 1.00 | 0.00 |
| ATOM | 1886 | C10 | LIG | 113 | -10.313 | -18.335 | -17.424 | 1.00 | 0.00 |
| ATOM | 1887 | H19 | LIG | 113 | -9.868  | -19.334 | -17.348 | 1.00 | 0.00 |
| ATOM | 1888 | H20 | LIG | 113 | -10.061 | -17.819 | -16.489 | 1.00 | 0.00 |
| ATOM | 1889 | C11 | LIG | 113 | -21.052 | -22.743 | -12.064 | 1.00 | 0.00 |
| ATOM | 1890 | H21 | LIG | 113 | -20.660 | -23.759 | -11.980 | 1.00 | 0.00 |
| ATOM | 1891 | H22 | LIG | 113 | -20.883 | -22.206 | -11.127 | 1.00 | 0.00 |
| ATOM | 1892 | C12 | LIG | 113 | -9.690  | -17.586 | -18.605 | 1.00 | 0.00 |

|      |      |     |     |     |         |         |         |      |      |
|------|------|-----|-----|-----|---------|---------|---------|------|------|
| ATOM | 1893 | H23 | LIG | 113 | -10.092 | -16.571 | -18.686 | 1.00 | 0.00 |
| ATOM | 1894 | H24 | LIG | 113 | -8.605  | -17.505 | -18.500 | 1.00 | 0.00 |
| ATOM | 1895 | H25 | LIG | 113 | -9.895  | -18.097 | -19.551 | 1.00 | 0.00 |
| TER  |      |     |     |     |         |         |         |      |      |
| ATOM | 1896 | S1  | LIG | 114 | 0.406   | 12.640  | -20.513 | 1.00 | 0.00 |
| ATOM | 1897 | O1  | LIG | 114 | 0.467   | 13.293  | -19.030 | 1.00 | 0.00 |
| ATOM | 1898 | O2  | LIG | 114 | 1.079   | 11.222  | -20.131 | 1.00 | 0.00 |
| ATOM | 1899 | H26 | LIG | 114 | 2.033   | 11.337  | -20.005 | 1.00 | 0.00 |
| ATOM | 1900 | O3  | LIG | 114 | -0.960  | 12.358  | -20.879 | 1.00 | 0.00 |
| ATOM | 1901 | O4  | LIG | 114 | 1.290   | 13.378  | -21.392 | 1.00 | 0.00 |
| ATOM | 1902 | C1  | LIG | 114 | -0.943  | 18.611  | -13.907 | 1.00 | 0.00 |
| ATOM | 1903 | H1  | LIG | 114 | -1.385  | 17.851  | -13.251 | 1.00 | 0.00 |
| ATOM | 1904 | H2  | LIG | 114 | 0.124   | 18.648  | -13.655 | 1.00 | 0.00 |
| ATOM | 1905 | C2  | LIG | 114 | -1.581  | 19.972  | -13.604 | 1.00 | 0.00 |
| ATOM | 1906 | H3  | LIG | 114 | -2.648  | 19.936  | -13.856 | 1.00 | 0.00 |
| ATOM | 1907 | H4  | LIG | 114 | -1.140  | 20.734  | -14.260 | 1.00 | 0.00 |
| ATOM | 1908 | C3  | LIG | 114 | -1.103  | 18.174  | -15.367 | 1.00 | 0.00 |
| ATOM | 1909 | H5  | LIG | 114 | -0.659  | 18.934  | -16.024 | 1.00 | 0.00 |
| ATOM | 1910 | H6  | LIG | 114 | -2.171  | 18.140  | -15.620 | 1.00 | 0.00 |
| ATOM | 1911 | C4  | LIG | 114 | -1.422  | 20.413  | -12.144 | 1.00 | 0.00 |
| ATOM | 1912 | H7  | LIG | 114 | -0.354  | 20.451  | -11.891 | 1.00 | 0.00 |
| ATOM | 1913 | H8  | LIG | 114 | -1.861  | 19.652  | -11.487 | 1.00 | 0.00 |

|      |      |     |     |     |        |        |         |      |      |
|------|------|-----|-----|-----|--------|--------|---------|------|------|
| ATOM | 1914 | C5  | LIG | 114 | -0.468 | 16.812 | -15.671 | 1.00 | 0.00 |
| ATOM | 1915 | H9  | LIG | 114 | 0.599  | 16.844 | -15.416 | 1.00 | 0.00 |
| ATOM | 1916 | H10 | LIG | 114 | -0.914 | 16.050 | -15.018 | 1.00 | 0.00 |
| ATOM | 1917 | C6  | LIG | 114 | -2.060 | 21.773 | -11.839 | 1.00 | 0.00 |
| ATOM | 1918 | H11 | LIG | 114 | -3.127 | 21.736 | -12.092 | 1.00 | 0.00 |
| ATOM | 1919 | H12 | LIG | 114 | -1.619 | 22.535 | -12.497 | 1.00 | 0.00 |
| ATOM | 1920 | C7  | LIG | 114 | -0.627 | 16.378 | -17.132 | 1.00 | 0.00 |
| ATOM | 1921 | H13 | LIG | 114 | -1.694 | 16.349 | -17.387 | 1.00 | 0.00 |
| ATOM | 1922 | H14 | LIG | 114 | -0.177 | 17.138 | -17.785 | 1.00 | 0.00 |
| ATOM | 1923 | C8  | LIG | 114 | -1.901 | 22.214 | -10.380 | 1.00 | 0.00 |
| ATOM | 1924 | H15 | LIG | 114 | -2.342 | 21.454 | -9.721  | 1.00 | 0.00 |
| ATOM | 1925 | H16 | LIG | 114 | -0.834 | 22.251 | -10.127 | 1.00 | 0.00 |
| ATOM | 1926 | C9  | LIG | 114 | 0.007  | 15.011 | -17.422 | 1.00 | 0.00 |
| ATOM | 1927 | H17 | LIG | 114 | -0.451 | 14.243 | -16.790 | 1.00 | 0.00 |
| ATOM | 1928 | H18 | LIG | 114 | 1.074  | 15.034 | -17.178 | 1.00 | 0.00 |
| ATOM | 1929 | C10 | LIG | 114 | -2.539 | 23.575 | -10.074 | 1.00 | 0.00 |
| ATOM | 1930 | H19 | LIG | 114 | -3.605 | 23.537 | -10.328 | 1.00 | 0.00 |
| ATOM | 1931 | H20 | LIG | 114 | -2.097 | 24.334 | -10.731 | 1.00 | 0.00 |
| ATOM | 1932 | C11 | LIG | 114 | -0.158 | 14.611 | -18.876 | 1.00 | 0.00 |
| ATOM | 1933 | H21 | LIG | 114 | -1.211 | 14.525 | -19.155 | 1.00 | 0.00 |
| ATOM | 1934 | H22 | LIG | 114 | 0.343  | 15.312 | -19.549 | 1.00 | 0.00 |
| ATOM | 1935 | C12 | LIG | 114 | -2.376 | 24.005 | -8.613  | 1.00 | 0.00 |

|      |      |     |     |     |        |        |        |      |      |
|------|------|-----|-----|-----|--------|--------|--------|------|------|
| ATOM | 1936 | H23 | LIG | 114 | -1.318 | 24.084 | -8.341 | 1.00 | 0.00 |
| ATOM | 1937 | H24 | LIG | 114 | -2.839 | 24.978 | -8.430 | 1.00 | 0.00 |
| ATOM | 1938 | H25 | LIG | 114 | -2.838 | 23.283 | -7.934 | 1.00 | 0.00 |
| TER  |      |     |     |     |        |        |        |      |      |
| ATOM | 1939 | S1  | LIG | 115 | 11.892 | -1.318 | 17.091 | 1.00 | 0.00 |
| ATOM | 1940 | O1  | LIG | 115 | 12.752 | -0.186 | 16.311 | 1.00 | 0.00 |
| ATOM | 1941 | O2  | LIG | 115 | 11.579 | -0.449 | 18.416 | 1.00 | 0.00 |
| ATOM | 1942 | H26 | LIG | 115 | 12.376 | -0.393 | 18.965 | 1.00 | 0.00 |
| ATOM | 1943 | O3  | LIG | 115 | 10.626 | -1.526 | 16.432 | 1.00 | 0.00 |
| ATOM | 1944 | O4  | LIG | 115 | 12.763 | -2.425 | 17.429 | 1.00 | 0.00 |
| ATOM | 1945 | C1  | LIG | 115 | 16.502 | 2.615  | 10.428 | 1.00 | 0.00 |
| ATOM | 1946 | H1  | LIG | 115 | 15.876 | 3.516  | 10.469 | 1.00 | 0.00 |
| ATOM | 1947 | H2  | LIG | 115 | 17.365 | 2.816  | 11.076 | 1.00 | 0.00 |
| ATOM | 1948 | C2  | LIG | 115 | 16.989 | 2.403  | 8.990  | 1.00 | 0.00 |
| ATOM | 1949 | H3  | LIG | 115 | 16.127 | 2.203  | 8.342  | 1.00 | 0.00 |
| ATOM | 1950 | H4  | LIG | 115 | 17.615 | 1.502  | 8.949  | 1.00 | 0.00 |
| ATOM | 1951 | C3  | LIG | 115 | 15.714 | 1.426  | 10.989 | 1.00 | 0.00 |
| ATOM | 1952 | H5  | LIG | 115 | 16.341 | 0.526  | 10.950 | 1.00 | 0.00 |
| ATOM | 1953 | H6  | LIG | 115 | 14.852 | 1.225  | 10.338 | 1.00 | 0.00 |
| ATOM | 1954 | C4  | LIG | 115 | 17.779 | 3.590  | 8.427  | 1.00 | 0.00 |
| ATOM | 1955 | H7  | LIG | 115 | 18.643 | 3.790  | 9.075  | 1.00 | 0.00 |
| ATOM | 1956 | H8  | LIG | 115 | 17.154 | 4.492  | 8.469  | 1.00 | 0.00 |

|      |      |     |     |     |        |        |        |      |      |
|------|------|-----|-----|-----|--------|--------|--------|------|------|
| ATOM | 1957 | C5  | LIG | 115 | 15.223 | 1.640  | 12.425 | 1.00 | 0.00 |
| ATOM | 1958 | H9  | LIG | 115 | 16.083 | 1.843  | 13.076 | 1.00 | 0.00 |
| ATOM | 1959 | H10 | LIG | 115 | 14.593 | 2.537  | 12.464 | 1.00 | 0.00 |
| ATOM | 1960 | C6  | LIG | 115 | 18.266 | 3.379  | 6.989  | 1.00 | 0.00 |
| ATOM | 1961 | H11 | LIG | 115 | 17.403 | 3.179  | 6.342  | 1.00 | 0.00 |
| ATOM | 1962 | H12 | LIG | 115 | 18.891 | 2.477  | 6.948  | 1.00 | 0.00 |
| ATOM | 1963 | C7  | LIG | 115 | 14.438 | 0.448  | 12.983 | 1.00 | 0.00 |
| ATOM | 1964 | H13 | LIG | 115 | 13.579 | 0.243  | 12.331 | 1.00 | 0.00 |
| ATOM | 1965 | H14 | LIG | 115 | 15.070 | -0.449 | 12.949 | 1.00 | 0.00 |
| ATOM | 1966 | C8  | LIG | 115 | 19.055 | 4.566  | 6.426  | 1.00 | 0.00 |
| ATOM | 1967 | H15 | LIG | 115 | 18.431 | 5.469  | 6.466  | 1.00 | 0.00 |
| ATOM | 1968 | H16 | LIG | 115 | 19.918 | 4.767  | 7.075  | 1.00 | 0.00 |
| ATOM | 1969 | C9  | LIG | 115 | 13.948 | 0.675  | 14.420 | 1.00 | 0.00 |
| ATOM | 1970 | H17 | LIG | 115 | 13.298 | 1.556  | 14.460 | 1.00 | 0.00 |
| ATOM | 1971 | H18 | LIG | 115 | 14.799 | 0.873  | 15.079 | 1.00 | 0.00 |
| ATOM | 1972 | C10 | LIG | 115 | 19.543 | 4.356  | 4.988  | 1.00 | 0.00 |
| ATOM | 1973 | H19 | LIG | 115 | 18.680 | 4.155  | 4.342  | 1.00 | 0.00 |
| ATOM | 1974 | H20 | LIG | 115 | 20.168 | 3.455  | 4.948  | 1.00 | 0.00 |
| ATOM | 1975 | C11 | LIG | 115 | 13.181 | -0.521 | 14.949 | 1.00 | 0.00 |
| ATOM | 1976 | H21 | LIG | 115 | 12.291 | -0.728 | 14.351 | 1.00 | 0.00 |
| ATOM | 1977 | H22 | LIG | 115 | 13.807 | -1.417 | 14.995 | 1.00 | 0.00 |
| ATOM | 1978 | C12 | LIG | 115 | 20.330 | 5.548  | 4.435  | 1.00 | 0.00 |



|      |      |     |     |     |        |        |         |      |      |
|------|------|-----|-----|-----|--------|--------|---------|------|------|
| ATOM | 1979 | H23 | LIG | 115 | 21.218 | 5.751  | 5.042   | 1.00 | 0.00 |
| ATOM | 1980 | H24 | LIG | 115 | 20.664 | 5.365  | 3.410   | 1.00 | 0.00 |
| ATOM | 1981 | H25 | LIG | 115 | 19.719 | 6.456  | 4.428   | 1.00 | 0.00 |
| TER  |      |     |     |     |        |        |         |      |      |
| ATOM | 1982 | S1  | LIG | 116 | 24.340 | 1.745  | -16.820 | 1.00 | 0.00 |
| ATOM | 1983 | O1  | LIG | 116 | 23.954 | 2.141  | -15.296 | 1.00 | 0.00 |
| ATOM | 1984 | O2  | LIG | 116 | 24.743 | 3.229  | -17.313 | 1.00 | 0.00 |
| ATOM | 1985 | H26 | LIG | 116 | 23.942 | 3.759  | -17.443 | 1.00 | 0.00 |
| ATOM | 1986 | O3  | LIG | 116 | 25.551 | 0.964  | -16.843 | 1.00 | 0.00 |
| ATOM | 1987 | O4  | LIG | 116 | 23.143 | 1.310  | -17.513 | 1.00 | 0.00 |
| ATOM | 1988 | C1  | LIG | 116 | 21.922 | 0.643  | -8.215  | 1.00 | 0.00 |
| ATOM | 1989 | H1  | LIG | 116 | 22.779 | 1.224  | -7.855  | 1.00 | 0.00 |
| ATOM | 1990 | H2  | LIG | 116 | 21.090 | 1.353  | -8.306  | 1.00 | 0.00 |
| ATOM | 1991 | C2  | LIG | 116 | 21.562 | -0.426 | -7.175  | 1.00 | 0.00 |
| ATOM | 1992 | H3  | LIG | 116 | 22.393 | -1.136 | -7.084  | 1.00 | 0.00 |
| ATOM | 1993 | H4  | LIG | 116 | 20.704 | -1.008 | -7.536  | 1.00 | 0.00 |
| ATOM | 1994 | C3  | LIG | 116 | 22.247 | 0.066  | -9.597  | 1.00 | 0.00 |
| ATOM | 1995 | H5  | LIG | 116 | 21.387 | -0.515 | -9.959  | 1.00 | 0.00 |
| ATOM | 1996 | H6  | LIG | 116 | 23.077 | -0.647 | -9.505  | 1.00 | 0.00 |
| ATOM | 1997 | C4  | LIG | 116 | 21.235 | 0.149  | -5.792  | 1.00 | 0.00 |
| ATOM | 1998 | H7  | LIG | 116 | 20.402 | 0.859  | -5.883  | 1.00 | 0.00 |
| ATOM | 1999 | H8  | LIG | 116 | 22.092 | 0.733  | -5.432  | 1.00 | 0.00 |

|      |      |     |     |     |        |        |         |      |      |
|------|------|-----|-----|-----|--------|--------|---------|------|------|
| ATOM | 2000 | C5  | LIG | 116 | 22.609 | 1.132  | -10.636 | 1.00 | 0.00 |
| ATOM | 2001 | H9  | LIG | 116 | 21.781 | 1.847  | -10.727 | 1.00 | 0.00 |
| ATOM | 2002 | H10 | LIG | 116 | 23.471 | 1.710  | -10.277 | 1.00 | 0.00 |
| ATOM | 2003 | C6  | LIG | 116 | 20.876 | -0.918 | -4.752  | 1.00 | 0.00 |
| ATOM | 2004 | H11 | LIG | 116 | 21.708 | -1.628 | -4.661  | 1.00 | 0.00 |
| ATOM | 2005 | H12 | LIG | 116 | 20.018 | -1.501 | -5.113  | 1.00 | 0.00 |
| ATOM | 2006 | C7  | LIG | 116 | 22.931 | 0.552  | -12.018 | 1.00 | 0.00 |
| ATOM | 2007 | H13 | LIG | 116 | 23.758 | -0.163 | -11.925 | 1.00 | 0.00 |
| ATOM | 2008 | H14 | LIG | 116 | 22.068 | -0.021 | -12.378 | 1.00 | 0.00 |
| ATOM | 2009 | C8  | LIG | 116 | 20.550 | -0.344 | -3.369  | 1.00 | 0.00 |
| ATOM | 2010 | H15 | LIG | 116 | 21.407 | 0.239  | -3.006  | 1.00 | 0.00 |
| ATOM | 2011 | H16 | LIG | 116 | 19.718 | 0.367  | -3.459  | 1.00 | 0.00 |
| ATOM | 2012 | C9  | LIG | 116 | 23.298 | 1.630  | -13.047 | 1.00 | 0.00 |
| ATOM | 2013 | H17 | LIG | 116 | 24.173 | 2.193  | -12.705 | 1.00 | 0.00 |
| ATOM | 2014 | H18 | LIG | 116 | 22.475 | 2.344  | -13.151 | 1.00 | 0.00 |
| ATOM | 2015 | C10 | LIG | 116 | 20.190 | -1.411 | -2.328  | 1.00 | 0.00 |
| ATOM | 2016 | H19 | LIG | 116 | 21.022 | -2.120 | -2.238  | 1.00 | 0.00 |
| ATOM | 2017 | H20 | LIG | 116 | 19.333 | -1.992 | -2.689  | 1.00 | 0.00 |
| ATOM | 2018 | C11 | LIG | 116 | 23.604 | 1.029  | -14.405 | 1.00 | 0.00 |
| ATOM | 2019 | H21 | LIG | 116 | 24.455 | 0.344  | -14.363 | 1.00 | 0.00 |
| ATOM | 2020 | H22 | LIG | 116 | 22.738 | 0.510  | -14.825 | 1.00 | 0.00 |
| ATOM | 2021 | C12 | LIG | 116 | 19.867 | -0.827 | -0.949  | 1.00 | 0.00 |

|      |      |     |     |     |         |         |        |      |      |
|------|------|-----|-----|-----|---------|---------|--------|------|------|
| ATOM | 2022 | H23 | LIG | 116 | 19.017  | -0.138  | -1.002 | 1.00 | 0.00 |
| ATOM | 2023 | H24 | LIG | 116 | 19.613  | -1.612  | -0.232 | 1.00 | 0.00 |
| ATOM | 2024 | H25 | LIG | 116 | 20.718  | -0.270  | -0.546 | 1.00 | 0.00 |
| TER  |      |     |     |     |         |         |        |      |      |
| ATOM | 2025 | S1  | LIG | 117 | -20.265 | -13.420 | 14.722 | 1.00 | 0.00 |
| ATOM | 2026 | O1  | LIG | 117 | -19.130 | -12.532 | 15.466 | 1.00 | 0.00 |
| ATOM | 2027 | O2  | LIG | 117 | -19.710 | -14.868 | 15.174 | 1.00 | 0.00 |
| ATOM | 2028 | H26 | LIG | 117 | -18.919 | -15.089 | 14.660 | 1.00 | 0.00 |
| ATOM | 2029 | O3  | LIG | 117 | -21.539 | -13.250 | 15.375 | 1.00 | 0.00 |
| ATOM | 2030 | O4  | LIG | 117 | -20.120 | -13.268 | 13.288 | 1.00 | 0.00 |
| ATOM | 2031 | C1  | LIG | 117 | -15.970 | -6.100  | 17.736 | 1.00 | 0.00 |
| ATOM | 2032 | H1  | LIG | 117 | -15.948 | -6.484  | 18.764 | 1.00 | 0.00 |
| ATOM | 2033 | H2  | LIG | 117 | -15.021 | -6.407  | 17.277 | 1.00 | 0.00 |
| ATOM | 2034 | C2  | LIG | 117 | -16.043 | -4.569  | 17.769 | 1.00 | 0.00 |
| ATOM | 2035 | H3  | LIG | 117 | -16.991 | -4.262  | 18.229 | 1.00 | 0.00 |
| ATOM | 2036 | H4  | LIG | 117 | -16.066 | -4.185  | 16.741 | 1.00 | 0.00 |
| ATOM | 2037 | C3  | LIG | 117 | -17.132 | -6.752  | 16.979 | 1.00 | 0.00 |
| ATOM | 2038 | H5  | LIG | 117 | -17.153 | -6.370  | 15.949 | 1.00 | 0.00 |
| ATOM | 2039 | H6  | LIG | 117 | -18.080 | -6.443  | 17.437 | 1.00 | 0.00 |
| ATOM | 2040 | C4  | LIG | 117 | -14.881 | -3.915  | 18.526 | 1.00 | 0.00 |
| ATOM | 2041 | H7  | LIG | 117 | -13.932 | -4.221  | 18.066 | 1.00 | 0.00 |
| ATOM | 2042 | H8  | LIG | 117 | -14.857 | -4.299  | 19.553 | 1.00 | 0.00 |

|      |      |     |     |     |         |         |        |      |      |
|------|------|-----|-----|-----|---------|---------|--------|------|------|
| ATOM | 2043 | C5  | LIG | 117 | -17.061 | -8.283  | 16.948 | 1.00 | 0.00 |
| ATOM | 2044 | H9  | LIG | 117 | -16.112 | -8.593  | 16.492 | 1.00 | 0.00 |
| ATOM | 2045 | H10 | LIG | 117 | -17.044 | -8.666  | 17.976 | 1.00 | 0.00 |
| ATOM | 2046 | C6  | LIG | 117 | -14.953 | -2.384  | 18.560 | 1.00 | 0.00 |
| ATOM | 2047 | H11 | LIG | 117 | -15.902 | -2.078  | 19.019 | 1.00 | 0.00 |
| ATOM | 2048 | H12 | LIG | 117 | -14.977 | -2.000  | 17.531 | 1.00 | 0.00 |
| ATOM | 2049 | C7  | LIG | 117 | -18.223 | -8.931  | 16.187 | 1.00 | 0.00 |
| ATOM | 2050 | H13 | LIG | 117 | -19.172 | -8.618  | 16.642 | 1.00 | 0.00 |
| ATOM | 2051 | H14 | LIG | 117 | -18.236 | -8.551  | 15.157 | 1.00 | 0.00 |
| ATOM | 2052 | C8  | LIG | 117 | -13.792 | -1.730  | 19.316 | 1.00 | 0.00 |
| ATOM | 2053 | H15 | LIG | 117 | -13.768 | -2.112  | 20.345 | 1.00 | 0.00 |
| ATOM | 2054 | H16 | LIG | 117 | -12.843 | -2.036  | 18.857 | 1.00 | 0.00 |
| ATOM | 2055 | C9  | LIG | 117 | -18.144 | -10.463 | 16.168 | 1.00 | 0.00 |
| ATOM | 2056 | H17 | LIG | 117 | -18.152 | -10.852 | 17.192 | 1.00 | 0.00 |
| ATOM | 2057 | H18 | LIG | 117 | -17.203 | -10.784 | 15.709 | 1.00 | 0.00 |
| ATOM | 2058 | C10 | LIG | 117 | -13.864 | -0.199  | 19.351 | 1.00 | 0.00 |
| ATOM | 2059 | H19 | LIG | 117 | -14.812 | 0.107   | 19.809 | 1.00 | 0.00 |
| ATOM | 2060 | H20 | LIG | 117 | -13.886 | 0.184   | 18.323 | 1.00 | 0.00 |
| ATOM | 2061 | C11 | LIG | 117 | -19.301 | -11.077 | 15.403 | 1.00 | 0.00 |
| ATOM | 2062 | H21 | LIG | 117 | -20.263 | -10.826 | 15.855 | 1.00 | 0.00 |
| ATOM | 2063 | H22 | LIG | 117 | -19.299 | -10.774 | 14.353 | 1.00 | 0.00 |
| ATOM | 2064 | C12 | LIG | 117 | -12.699 | 0.445   | 20.109 | 1.00 | 0.00 |

|      |      |     |     |     |         |        |        |      |      |
|------|------|-----|-----|-----|---------|--------|--------|------|------|
| ATOM | 2065 | H23 | LIG | 117 | -11.739 | 0.185  | 19.653 | 1.00 | 0.00 |
| ATOM | 2066 | H24 | LIG | 117 | -12.780 | 1.535  | 20.114 | 1.00 | 0.00 |
| ATOM | 2067 | H25 | LIG | 117 | -12.672 | 0.110  | 21.151 | 1.00 | 0.00 |
| TER  |      |     |     |     |         |        |        |      |      |
| ATOM | 2068 | S1  | LIG | 118 | 9.217   | 9.957  | 13.878 | 1.00 | 0.00 |
| ATOM | 2069 | O1  | LIG | 118 | 10.120  | 11.134 | 13.223 | 1.00 | 0.00 |
| ATOM | 2070 | O2  | LIG | 118 | 7.783   | 10.670 | 13.668 | 1.00 | 0.00 |
| ATOM | 2071 | H26 | LIG | 118 | 7.675   | 11.385 | 14.313 | 1.00 | 0.00 |
| ATOM | 2072 | O3  | LIG | 118 | 9.222   | 8.792  | 13.030 | 1.00 | 0.00 |
| ATOM | 2073 | O4  | LIG | 118 | 9.513   | 9.867  | 15.294 | 1.00 | 0.00 |
| ATOM | 2074 | C1  | LIG | 118 | 16.547  | 14.180 | 10.788 | 1.00 | 0.00 |
| ATOM | 2075 | H1  | LIG | 118 | 16.073  | 14.386 | 9.820  | 1.00 | 0.00 |
| ATOM | 2076 | H2  | LIG | 118 | 16.363  | 15.063 | 11.412 | 1.00 | 0.00 |
| ATOM | 2077 | C2  | LIG | 118 | 18.058  | 14.012 | 10.585 | 1.00 | 0.00 |
| ATOM | 2078 | H3  | LIG | 118 | 18.243  | 13.129 | 9.960  | 1.00 | 0.00 |
| ATOM | 2079 | H4  | LIG | 118 | 18.533  | 13.805 | 11.553 | 1.00 | 0.00 |
| ATOM | 2080 | C3  | LIG | 118 | 15.877  | 12.959 | 11.428 | 1.00 | 0.00 |
| ATOM | 2081 | H5  | LIG | 118 | 16.351  | 12.753 | 12.398 | 1.00 | 0.00 |
| ATOM | 2082 | H6  | LIG | 118 | 16.065  | 12.075 | 10.805 | 1.00 | 0.00 |
| ATOM | 2083 | C4  | LIG | 118 | 18.730  | 15.232 | 9.945  | 1.00 | 0.00 |
| ATOM | 2084 | H7  | LIG | 118 | 18.546  | 16.116 | 10.570 | 1.00 | 0.00 |
| ATOM | 2085 | H8  | LIG | 118 | 18.255  | 15.441 | 8.978  | 1.00 | 0.00 |

|      |      |     |     |     |        |        |        |      |      |
|------|------|-----|-----|-----|--------|--------|--------|------|------|
| ATOM | 2086 | C5  | LIG | 118 | 14.367 | 13.124 | 11.629 | 1.00 | 0.00 |
| ATOM | 2087 | H9  | LIG | 118 | 14.178 | 14.010 | 12.250 | 1.00 | 0.00 |
| ATOM | 2088 | H10 | LIG | 118 | 13.892 | 13.326 | 10.660 | 1.00 | 0.00 |
| ATOM | 2089 | C6  | LIG | 118 | 20.240 | 15.065 | 9.741  | 1.00 | 0.00 |
| ATOM | 2090 | H11 | LIG | 118 | 20.425 | 14.182 | 9.117  | 1.00 | 0.00 |
| ATOM | 2091 | H12 | LIG | 118 | 20.716 | 14.857 | 10.709 | 1.00 | 0.00 |
| ATOM | 2092 | C7  | LIG | 118 | 13.701 | 11.903 | 12.272 | 1.00 | 0.00 |
| ATOM | 2093 | H13 | LIG | 118 | 13.892 | 11.019 | 11.652 | 1.00 | 0.00 |
| ATOM | 2094 | H14 | LIG | 118 | 14.172 | 11.705 | 13.243 | 1.00 | 0.00 |
| ATOM | 2095 | C8  | LIG | 118 | 20.913 | 16.285 | 9.101  | 1.00 | 0.00 |
| ATOM | 2096 | H15 | LIG | 118 | 20.440 | 16.494 | 8.132  | 1.00 | 0.00 |
| ATOM | 2097 | H16 | LIG | 118 | 20.728 | 17.169 | 9.725  | 1.00 | 0.00 |
| ATOM | 2098 | C9  | LIG | 118 | 12.188 | 12.079 | 12.462 | 1.00 | 0.00 |
| ATOM | 2099 | H17 | LIG | 118 | 11.706 | 12.256 | 11.495 | 1.00 | 0.00 |
| ATOM | 2100 | H18 | LIG | 118 | 11.988 | 12.956 | 13.087 | 1.00 | 0.00 |
| ATOM | 2101 | C10 | LIG | 118 | 22.424 | 16.119 | 8.896  | 1.00 | 0.00 |
| ATOM | 2102 | H19 | LIG | 118 | 22.608 | 15.235 | 8.274  | 1.00 | 0.00 |
| ATOM | 2103 | H20 | LIG | 118 | 22.897 | 15.912 | 9.864  | 1.00 | 0.00 |
| ATOM | 2104 | C11 | LIG | 118 | 11.557 | 10.860 | 13.107 | 1.00 | 0.00 |
| ATOM | 2105 | H21 | LIG | 118 | 11.686 | 9.965  | 12.494 | 1.00 | 0.00 |
| ATOM | 2106 | H22 | LIG | 118 | 11.955 | 10.678 | 14.109 | 1.00 | 0.00 |
| ATOM | 2107 | C12 | LIG | 118 | 23.086 | 17.342 | 8.256  | 1.00 | 0.00 |

|      |      |     |     |     |        |         |        |      |      |
|------|------|-----|-----|-----|--------|---------|--------|------|------|
| ATOM | 2108 | H23 | LIG | 118 | 22.948 | 18.235  | 8.874  | 1.00 | 0.00 |
| ATOM | 2109 | H24 | LIG | 118 | 24.161 | 17.193  | 8.126  | 1.00 | 0.00 |
| ATOM | 2110 | H25 | LIG | 118 | 22.659 | 17.553  | 7.271  | 1.00 | 0.00 |
| TER  |      |     |     |     |        |         |        |      |      |
| ATOM | 2111 | S1  | LIG | 119 | 5.357  | -20.549 | 6.966  | 1.00 | 0.00 |
| ATOM | 2112 | O1  | LIG | 119 | 4.345  | -21.084 | 8.115  | 1.00 | 0.00 |
| ATOM | 2113 | O2  | LIG | 119 | 6.720  | -21.101 | 7.632  | 1.00 | 0.00 |
| ATOM | 2114 | H26 | LIG | 119 | 6.965  | -20.542 | 8.386  | 1.00 | 0.00 |
| ATOM | 2115 | O3  | LIG | 119 | 5.168  | -21.295 | 5.747  | 1.00 | 0.00 |
| ATOM | 2116 | O4  | LIG | 119 | 5.361  | -19.100 | 6.976  | 1.00 | 0.00 |
| ATOM | 2117 | C1  | LIG | 119 | -2.427 | -22.343 | 11.125 | 1.00 | 0.00 |
| ATOM | 2118 | H1  | LIG | 119 | -2.163 | -23.399 | 11.258 | 1.00 | 0.00 |
| ATOM | 2119 | H2  | LIG | 119 | -2.111 | -21.833 | 12.045 | 1.00 | 0.00 |
| ATOM | 2120 | C2  | LIG | 119 | -3.948 | -22.217 | 10.977 | 1.00 | 0.00 |
| ATOM | 2121 | H3  | LIG | 119 | -4.265 | -22.727 | 10.058 | 1.00 | 0.00 |
| ATOM | 2122 | H4  | LIG | 119 | -4.213 | -21.160 | 10.843 | 1.00 | 0.00 |
| ATOM | 2123 | C3  | LIG | 119 | -1.647 | -21.771 | 9.937  | 1.00 | 0.00 |
| ATOM | 2124 | H5  | LIG | 119 | -1.910 | -20.713 | 9.805  | 1.00 | 0.00 |
| ATOM | 2125 | H6  | LIG | 119 | -1.966 | -22.280 | 9.017  | 1.00 | 0.00 |
| ATOM | 2126 | C4  | LIG | 119 | -4.731 | -22.787 | 12.165 | 1.00 | 0.00 |
| ATOM | 2127 | H7  | LIG | 119 | -4.415 | -22.276 | 13.085 | 1.00 | 0.00 |
| ATOM | 2128 | H8  | LIG | 119 | -4.465 | -23.844 | 12.299 | 1.00 | 0.00 |

|      |      |     |     |     |        |         |        |      |      |
|------|------|-----|-----|-----|--------|---------|--------|------|------|
| ATOM | 2129 | C5  | LIG | 119 | -0.127 | -21.900 | 10.083 | 1.00 | 0.00 |
| ATOM | 2130 | H9  | LIG | 119 | 0.193  | -21.394 | 11.003 | 1.00 | 0.00 |
| ATOM | 2131 | H10 | LIG | 119 | 0.138  | -22.957 | 10.210 | 1.00 | 0.00 |
| ATOM | 2132 | C6  | LIG | 119 | -6.251 | -22.663 | 12.017 | 1.00 | 0.00 |
| ATOM | 2133 | H11 | LIG | 119 | -6.567 | -23.172 | 11.098 | 1.00 | 0.00 |
| ATOM | 2134 | H12 | LIG | 119 | -6.517 | -21.605 | 11.883 | 1.00 | 0.00 |
| ATOM | 2135 | C7  | LIG | 119 | 0.650  | -21.325 | 8.894  | 1.00 | 0.00 |
| ATOM | 2136 | H13 | LIG | 119 | 0.329  | -21.830 | 7.974  | 1.00 | 0.00 |
| ATOM | 2137 | H14 | LIG | 119 | 0.390  | -20.266 | 8.771  | 1.00 | 0.00 |
| ATOM | 2138 | C8  | LIG | 119 | -7.034 | -23.232 | 13.204 | 1.00 | 0.00 |
| ATOM | 2139 | H15 | LIG | 119 | -6.771 | -24.290 | 13.339 | 1.00 | 0.00 |
| ATOM | 2140 | H16 | LIG | 119 | -6.718 | -22.723 | 14.124 | 1.00 | 0.00 |
| ATOM | 2141 | C9  | LIG | 119 | 2.171  | -21.464 | 9.050  | 1.00 | 0.00 |
| ATOM | 2142 | H17 | LIG | 119 | 2.442  | -22.520 | 9.153  | 1.00 | 0.00 |
| ATOM | 2143 | H18 | LIG | 119 | 2.502  | -20.957 | 9.962  | 1.00 | 0.00 |
| ATOM | 2144 | C10 | LIG | 119 | -8.555 | -23.108 | 13.057 | 1.00 | 0.00 |
| ATOM | 2145 | H19 | LIG | 119 | -8.870 | -23.617 | 12.138 | 1.00 | 0.00 |
| ATOM | 2146 | H20 | LIG | 119 | -8.819 | -22.052 | 12.924 | 1.00 | 0.00 |
| ATOM | 2147 | C11 | LIG | 119 | 2.914  | -20.881 | 7.864  | 1.00 | 0.00 |
| ATOM | 2148 | H21 | LIG | 119 | 2.654  | -21.391 | 6.933  | 1.00 | 0.00 |
| ATOM | 2149 | H22 | LIG | 119 | 2.731  | -19.808 | 7.757  | 1.00 | 0.00 |
| ATOM | 2150 | C12 | LIG | 119 | -9.328 | -23.681 | 14.249 | 1.00 | 0.00 |



```

ATOM 2151 H23 LIG 119 -9.059 -23.169 15.178 1.00 0.00
ATOM 2152 H24 LIG 119 -10.408 -23.575 14.113 1.00 0.00
ATOM 2153 H25 LIG 119 -9.113 -24.745 14.385 1.00 0.00
TER
END

```

**Table L:** The number of atoms present in the system of BN-Sum

```

ATOM 1 N GLN 1 -7.420 -12.315 1.093 1.00 0.00
ATOM 2 H1 GLN 1 -6.489 -12.646 1.302 1.00 0.00
ATOM 3 H2 GLN 1 -7.651 -11.569 1.733 1.00 0.00
ATOM 4 H3 GLN 1 -7.497 -12.168 0.097 1.00 0.00
ATOM 5 CA GLN 1 -8.365 -13.393 1.399 1.00 0.00
ATOM 6 HA GLN 1 -9.067 -13.055 2.161 1.00 0.00
ATOM 7 CB GLN 1 -9.158 -13.809 0.152 1.00 0.00
ATOM 8 HB2 GLN 1 -8.861 -13.175 -0.683 1.00 0.00
ATOM 9 HB3 GLN 1 -8.928 -14.849 -0.082 1.00 0.00
ATOM 10 CG GLN 1 -10.658 -13.662 0.393 1.00 0.00
ATOM 11 HG2 GLN 1 -11.273 -14.469 -0.006 1.00 0.00
ATOM 12 HG3 GLN 1 -10.734 -13.651 1.480 1.00 0.00
ATOM 13 CD GLN 1 -11.183 -12.341 -0.144 1.00 0.00
ATOM 14 OE1 GLN 1 -11.541 -11.440 0.596 1.00 0.00
ATOM 15 NE2 GLN 1 -11.079 -12.181 -1.450 1.00 0.00

```

|      |    |      |     |   |         |         |        |      |      |
|------|----|------|-----|---|---------|---------|--------|------|------|
| ATOM | 16 | HE21 | GLN | 1 | -11.407 | -11.328 | -1.879 | 1.00 | 0.00 |
| ATOM | 17 | HE22 | GLN | 1 | -10.672 | -12.913 | -2.015 | 1.00 | 0.00 |
| ATOM | 18 | C    | GLN | 1 | -7.633  | -14.596 | 1.983  | 1.00 | 0.00 |
| ATOM | 19 | O    | GLN | 1 | -7.985  | -15.076 | 3.051  | 1.00 | 0.00 |
| ATOM | 20 | N    | PRO | 2 | -6.575  | -15.047 | 1.287  | 1.00 | 0.00 |
| ATOM | 21 | CD   | PRO | 2 | -6.079  | -14.523 | 0.016  | 1.00 | 0.00 |
| ATOM | 22 | HD2  | PRO | 2 | -5.674  | -13.529 | 0.206  | 1.00 | 0.00 |
| ATOM | 23 | HD3  | PRO | 2 | -6.929  | -14.445 | -0.661 | 1.00 | 0.00 |
| ATOM | 24 | CG   | PRO | 2 | -5.025  | -15.496 | -0.487 | 1.00 | 0.00 |
| ATOM | 25 | HG2  | PRO | 2 | -4.060  | -14.991 | -0.528 | 1.00 | 0.00 |
| ATOM | 26 | HG3  | PRO | 2 | -5.299  | -15.837 | -1.486 | 1.00 | 0.00 |
| ATOM | 27 | CB   | PRO | 2 | -5.002  | -16.662 | 0.500  | 1.00 | 0.00 |
| ATOM | 28 | HB2  | PRO | 2 | -3.982  | -16.923 | 0.783  | 1.00 | 0.00 |
| ATOM | 29 | HB3  | PRO | 2 | -5.496  | -17.537 | 0.078  | 1.00 | 0.00 |
| ATOM | 30 | CA   | PRO | 2 | -5.771  | -16.169 | 1.724  | 1.00 | 0.00 |
| ATOM | 31 | HA   | PRO | 2 | -6.441  | -16.975 | 2.023  | 1.00 | 0.00 |
| ATOM | 32 | C    | PRO | 2 | -4.881  | -15.803 | 2.880  | 1.00 | 0.00 |
| ATOM | 33 | O    | PRO | 2 | -3.892  | -15.122 | 2.668  | 1.00 | 0.00 |
| ATOM | 34 | N    | GLN | 3 | -5.227  | -16.266 | 4.085  | 1.00 | 0.00 |
| ATOM | 35 | H    | GLN | 3 | -6.050  | -16.844 | 4.180  | 1.00 | 0.00 |
| ATOM | 36 | CA   | GLN | 3 | -4.459  | -15.964 | 5.274  | 1.00 | 0.00 |
| ATOM | 37 | HA   | GLN | 3 | -4.385  | -14.884 | 5.397  | 1.00 | 0.00 |

|      |    |      |     |   |        |         |       |      |      |
|------|----|------|-----|---|--------|---------|-------|------|------|
| ATOM | 38 | CB   | GLN | 3 | -5.125 | -16.552 | 6.517 | 1.00 | 0.00 |
| ATOM | 39 | HB2  | GLN | 3 | -6.176 | -16.741 | 6.298 | 1.00 | 0.00 |
| ATOM | 40 | HB3  | GLN | 3 | -4.633 | -17.492 | 6.769 | 1.00 | 0.00 |
| ATOM | 41 | CG   | GLN | 3 | -5.016 | -15.583 | 7.702 | 1.00 | 0.00 |
| ATOM | 42 | HG2  | GLN | 3 | -4.570 | -16.127 | 8.535 | 1.00 | 0.00 |
| ATOM | 43 | HG3  | GLN | 3 | -4.386 | -14.731 | 7.446 | 1.00 | 0.00 |
| ATOM | 44 | CD   | GLN | 3 | -6.373 | -15.070 | 8.131 | 1.00 | 0.00 |
| ATOM | 45 | OE1  | GLN | 3 | -6.993 | -15.584 | 9.041 | 1.00 | 0.00 |
| ATOM | 46 | NE2  | GLN | 3 | -6.839 | -14.058 | 7.421 | 1.00 | 0.00 |
| ATOM | 47 | HE21 | GLN | 3 | -7.739 | -13.660 | 7.646 | 1.00 | 0.00 |
| ATOM | 48 | HE22 | GLN | 3 | -6.293 | -13.688 | 6.656 | 1.00 | 0.00 |
| ATOM | 49 | C    | GLN | 3 | -3.077 | -16.541 | 5.150 | 1.00 | 0.00 |
| ATOM | 50 | O    | GLN | 3 | -2.136 | -15.964 | 5.622 | 1.00 | 0.00 |
| ATOM | 51 | N    | LYS | 4 | -2.911 | -17.655 | 4.445 | 1.00 | 0.00 |
| ATOM | 52 | H    | LYS | 4 | -3.727 | -18.137 | 4.096 | 1.00 | 0.00 |
| ATOM | 53 | CA   | LYS | 4 | -1.607 | -18.262 | 4.229 | 1.00 | 0.00 |
| ATOM | 54 | HA   | LYS | 4 | -1.256 | -18.741 | 5.143 | 1.00 | 0.00 |
| ATOM | 55 | CB   | LYS | 4 | -1.714 | -19.324 | 3.131 | 1.00 | 0.00 |
| ATOM | 56 | HB2  | LYS | 4 | -0.882 | -20.020 | 3.242 | 1.00 | 0.00 |
| ATOM | 57 | HB3  | LYS | 4 | -2.654 | -19.860 | 3.260 | 1.00 | 0.00 |
| ATOM | 58 | CG   | LYS | 4 | -1.672 | -18.695 | 1.729 | 1.00 | 0.00 |
| ATOM | 59 | HG2  | LYS | 4 | -1.881 | -17.629 | 1.817 | 1.00 | 0.00 |

|      |    |         |   |        |         |        |      |      |
|------|----|---------|---|--------|---------|--------|------|------|
| ATOM | 60 | HG3 LYS | 4 | -0.675 | -18.837 | 1.311  | 1.00 | 0.00 |
| ATOM | 61 | CD LYS  | 4 | -2.706 | -19.342 | 0.809  | 1.00 | 0.00 |
| ATOM | 62 | HD2 LYS | 4 | -3.669 | -19.364 | 1.320  | 1.00 | 0.00 |
| ATOM | 63 | HD3 LYS | 4 | -2.791 | -18.747 | -0.100 | 1.00 | 0.00 |
| ATOM | 64 | CE LYS  | 4 | -2.290 | -20.767 | 0.447  | 1.00 | 0.00 |
| ATOM | 65 | HE2 LYS | 4 | -2.089 | -20.820 | -0.623 | 1.00 | 0.00 |
| ATOM | 66 | HE3 LYS | 4 | -1.387 | -21.027 | 0.999  | 1.00 | 0.00 |
| ATOM | 67 | NZ LYS  | 4 | -3.366 | -21.714 | 0.792  | 1.00 | 0.00 |
| ATOM | 68 | HZ1 LYS | 4 | -4.203 | -21.474 | 0.280  | 1.00 | 0.00 |
| ATOM | 69 | HZ2 LYS | 4 | -3.080 | -22.652 | 0.548  | 1.00 | 0.00 |
| ATOM | 70 | HZ3 LYS | 4 | -3.552 | -21.666 | 1.783  | 1.00 | 0.00 |
| ATOM | 71 | C LYS   | 4 | -0.553 | -17.190 | 3.900  | 1.00 | 0.00 |
| ATOM | 72 | O LYS   | 4 | 0.590  | -17.354 | 4.264  | 1.00 | 0.00 |
| ATOM | 73 | N CYX   | 5 | -0.997 | -16.091 | 3.264  | 1.00 | 0.00 |
| ATOM | 74 | H CYX   | 5 | -1.957 | -16.058 | 2.952  | 1.00 | 0.00 |
| ATOM | 75 | CA CYX  | 5 | -0.158 | -14.974 | 2.988  | 1.00 | 0.00 |
| ATOM | 76 | HA CYX  | 5 | 0.859  | -15.170 | 3.327  | 1.00 | 0.00 |
| ATOM | 77 | CB CYX  | 5 | -0.131 | -14.729 | 1.502  | 1.00 | 0.00 |
| ATOM | 78 | HB2 CYX | 5 | -0.722 | -15.493 | 0.996  | 1.00 | 0.00 |
| ATOM | 79 | HB3 CYX | 5 | -0.549 | -13.746 | 1.288  | 1.00 | 0.00 |
| ATOM | 80 | SG CYX  | 5 | 1.535  | -14.807 | 0.776  | 1.00 | 0.00 |
| ATOM | 81 | C CYX   | 5 | -0.670 | -13.768 | 3.706  | 1.00 | 0.00 |

|      |     |      |     |   |        |         |       |      |      |
|------|-----|------|-----|---|--------|---------|-------|------|------|
| ATOM | 82  | O    | CYX | 5 | 0.086  | -13.011 | 4.232 | 1.00 | 0.00 |
| ATOM | 83  | N    | GLN | 6 | -1.980 | -13.577 | 3.829 | 1.00 | 0.00 |
| ATOM | 84  | H    | GLN | 6 | -2.594 | -14.215 | 3.342 | 1.00 | 0.00 |
| ATOM | 85  | CA   | GLN | 6 | -2.570 | -12.472 | 4.548 | 1.00 | 0.00 |
| ATOM | 86  | HA   | GLN | 6 | -2.159 | -11.532 | 4.180 | 1.00 | 0.00 |
| ATOM | 87  | CB   | GLN | 6 | -4.087 | -12.452 | 4.353 | 1.00 | 0.00 |
| ATOM | 88  | HB2  | GLN | 6 | -4.405 | -13.438 | 4.015 | 1.00 | 0.00 |
| ATOM | 89  | HB3  | GLN | 6 | -4.556 | -12.228 | 5.311 | 1.00 | 0.00 |
| ATOM | 90  | CG   | GLN | 6 | -4.503 | -11.405 | 3.327 | 1.00 | 0.00 |
| ATOM | 91  | HG2  | GLN | 6 | -3.589 | -10.900 | 3.014 | 1.00 | 0.00 |
| ATOM | 92  | HG3  | GLN | 6 | -4.977 | -11.867 | 2.461 | 1.00 | 0.00 |
| ATOM | 93  | CD   | GLN | 6 | -5.449 | -10.377 | 3.905 | 1.00 | 0.00 |
| ATOM | 94  | OE1  | GLN | 6 | -5.469 | -10.078 | 5.084 | 1.00 | 0.00 |
| ATOM | 95  | NE2  | GLN | 6 | -6.311 | -9.859  | 3.041 | 1.00 | 0.00 |
| ATOM | 96  | HE21 | GLN | 6 | -6.976 | -9.165  | 3.350 | 1.00 | 0.00 |
| ATOM | 97  | HE22 | GLN | 6 | -6.298 | -10.161 | 2.077 | 1.00 | 0.00 |
| ATOM | 98  | C    | GLN | 6 | -2.218 | -12.511 | 6.025 | 1.00 | 0.00 |
| ATOM | 99  | O    | GLN | 6 | -2.463 | -11.564 | 6.753 | 1.00 | 0.00 |
| ATOM | 100 | N    | ARG | 7 | -1.652 | -13.619 | 6.485 | 1.00 | 0.00 |
| ATOM | 101 | H    | ARG | 7 | -1.528 | -14.369 | 5.819 | 1.00 | 0.00 |
| ATOM | 102 | CA   | ARG | 7 | -1.241 | -13.839 | 7.839 | 1.00 | 0.00 |
| ATOM | 103 | HA   | ARG | 7 | -1.646 | -13.048 | 8.470 | 1.00 | 0.00 |

|      |     |      |     |   |        |         |        |      |      |
|------|-----|------|-----|---|--------|---------|--------|------|------|
| ATOM | 104 | CB   | ARG | 7 | -1.736 | -15.189 | 8.368  | 1.00 | 0.00 |
| ATOM | 105 | HB2  | ARG | 7 | -2.541 | -15.548 | 7.726  | 1.00 | 0.00 |
| ATOM | 106 | HB3  | ARG | 7 | -0.911 | -15.902 | 8.348  | 1.00 | 0.00 |
| ATOM | 107 | CG   | ARG | 7 | -2.251 | -15.047 | 9.797  | 1.00 | 0.00 |
| ATOM | 108 | HG2  | ARG | 7 | -1.523 | -14.480 | 10.376 | 1.00 | 0.00 |
| ATOM | 109 | HG3  | ARG | 7 | -3.198 | -14.507 | 9.775  | 1.00 | 0.00 |
| ATOM | 110 | CD   | ARG | 7 | -2.461 | -16.420 | 10.445 | 1.00 | 0.00 |
| ATOM | 111 | HD2  | ARG | 7 | -3.455 | -16.796 | 10.200 | 1.00 | 0.00 |
| ATOM | 112 | HD3  | ARG | 7 | -1.709 | -17.120 | 10.079 | 1.00 | 0.00 |
| ATOM | 113 | NE   | ARG | 7 | -2.341 | -16.321 | 11.914 | 1.00 | 0.00 |
| ATOM | 114 | HE   | ARG | 7 | -3.203 | -16.229 | 12.432 | 1.00 | 0.00 |
| ATOM | 115 | CZ   | ARG | 7 | -1.199 | -16.339 | 12.585 | 1.00 | 0.00 |
| ATOM | 116 | NH1  | ARG | 7 | -0.057 | -16.470 | 11.951 | 1.00 | 0.00 |
| ATOM | 117 | HH11 | ARG | 7 | -0.049 | -16.558 | 10.945 | 1.00 | 0.00 |
| ATOM | 118 | HH12 | ARG | 7 | 0.808  | -16.483 | 12.472 | 1.00 | 0.00 |
| ATOM | 119 | NH2  | ARG | 7 | -1.197 | -16.232 | 13.892 | 1.00 | 0.00 |
| ATOM | 120 | HH21 | ARG | 7 | -2.071 | -16.136 | 14.389 | 1.00 | 0.00 |
| ATOM | 121 | HH22 | ARG | 7 | -0.322 | -16.247 | 14.395 | 1.00 | 0.00 |
| ATOM | 122 | C    | ARG | 7 | 0.260  | -13.785 | 7.940  | 1.00 | 0.00 |
| ATOM | 123 | O    | ARG | 7 | 0.736  | -13.792 | 9.048  | 1.00 | 0.00 |
| ATOM | 124 | N    | GLU | 8 | 0.956  | -13.773 | 6.816  | 1.00 | 0.00 |
| ATOM | 125 | H    | GLU | 8 | 0.458  | -13.866 | 5.942  | 1.00 | 0.00 |

|      |     |     |     |   |       |         |       |      |      |
|------|-----|-----|-----|---|-------|---------|-------|------|------|
| ATOM | 126 | CA  | GLU | 8 | 2.401 | -13.696 | 6.777 | 1.00 | 0.00 |
| ATOM | 127 | HA  | GLU | 8 | 2.803 | -13.738 | 7.789 | 1.00 | 0.00 |
| ATOM | 128 | CB  | GLU | 8 | 2.970 | -14.868 | 5.977 | 1.00 | 0.00 |
| ATOM | 129 | HB2 | GLU | 8 | 2.147 | -15.412 | 5.512 | 1.00 | 0.00 |
| ATOM | 130 | HB3 | GLU | 8 | 3.632 | -14.480 | 5.203 | 1.00 | 0.00 |
| ATOM | 131 | CG  | GLU | 8 | 3.755 | -15.815 | 6.892 | 1.00 | 0.00 |
| ATOM | 132 | HG2 | GLU | 8 | 3.411 | -15.620 | 7.907 | 1.00 | 0.00 |
| ATOM | 133 | HG3 | GLU | 8 | 3.563 | -16.858 | 6.638 | 1.00 | 0.00 |
| ATOM | 134 | CD  | GLU | 8 | 5.259 | -15.536 | 6.800 | 1.00 | 0.00 |
| ATOM | 135 | OE1 | GLU | 8 | 5.818 | -15.800 | 5.716 | 1.00 | 0.00 |
| ATOM | 136 | OE2 | GLU | 8 | 5.815 | -15.120 | 7.835 | 1.00 | 0.00 |
| ATOM | 137 | C   | GLU | 8 | 2.877 | -12.375 | 6.190 | 1.00 | 0.00 |
| ATOM | 138 | O   | GLU | 8 | 3.945 | -11.890 | 6.506 | 1.00 | 0.00 |
| ATOM | 139 | N   | PHE | 9 | 2.018 | -11.719 | 5.422 | 1.00 | 0.00 |
| ATOM | 140 | H   | PHE | 9 | 1.104 | -12.129 | 5.290 | 1.00 | 0.00 |
| ATOM | 141 | CA  | PHE | 9 | 2.303 | -10.477 | 4.777 | 1.00 | 0.00 |
| ATOM | 142 | HA  | PHE | 9 | 3.341 | -10.444 | 4.447 | 1.00 | 0.00 |
| ATOM | 143 | CB  | PHE | 9 | 1.399 | -10.341 | 3.556 | 1.00 | 0.00 |
| ATOM | 144 | HB2 | PHE | 9 | 1.874 | -10.837 | 2.709 | 1.00 | 0.00 |
| ATOM | 145 | HB3 | PHE | 9 | 0.428 | -10.799 | 3.747 | 1.00 | 0.00 |
| ATOM | 146 | CG  | PHE | 9 | 1.128 | -8.914  | 3.127 | 1.00 | 0.00 |
| ATOM | 147 | CD1 | PHE | 9 | 0.305 | -8.075  | 3.897 | 1.00 | 0.00 |

|      |     |         |    |        |         |       |      |      |
|------|-----|---------|----|--------|---------|-------|------|------|
| ATOM | 148 | HD1 PHE | 9  | -0.167 | -8.477  | 4.793 | 1.00 | 0.00 |
| ATOM | 149 | CE1 PHE | 9  | 0.088  | -6.749  | 3.531 | 1.00 | 0.00 |
| ATOM | 150 | HE1 PHE | 9  | -0.511 | -6.096  | 4.165 | 1.00 | 0.00 |
| ATOM | 151 | CZ PHE  | 9  | 0.639  | -6.259  | 2.350 | 1.00 | 0.00 |
| ATOM | 152 | HZ PHE  | 9  | 0.465  | -5.228  | 2.041 | 1.00 | 0.00 |
| ATOM | 153 | CE2 PHE | 9  | 1.421  | -7.102  | 1.558 | 1.00 | 0.00 |
| ATOM | 154 | HE2 PHE | 9  | 1.833  | -6.718  | 0.625 | 1.00 | 0.00 |
| ATOM | 155 | CD2 PHE | 9  | 1.678  | -8.420  | 1.945 | 1.00 | 0.00 |
| ATOM | 156 | HD2 PHE | 9  | 2.306  | -9.058  | 1.323 | 1.00 | 0.00 |
| ATOM | 157 | C PHE   | 9  | 2.035  | -9.364  | 5.747 | 1.00 | 0.00 |
| ATOM | 158 | O PHE   | 9  | 2.709  | -8.354  | 5.767 | 1.00 | 0.00 |
| ATOM | 159 | N GLN   | 10 | 0.962  | -9.491  | 6.544 | 1.00 | 0.00 |
| ATOM | 160 | H GLN   | 10 | 0.373  | -10.307 | 6.449 | 1.00 | 0.00 |
| ATOM | 161 | CA GLN  | 10 | 0.574  | -8.473  | 7.491 | 1.00 | 0.00 |
| ATOM | 162 | HA GLN  | 10 | 1.028  | -7.522  | 7.212 | 1.00 | 0.00 |
| ATOM | 163 | CB GLN  | 10 | -0.949 | -8.301  | 7.514 | 1.00 | 0.00 |
| ATOM | 164 | HB2 GLN | 10 | -1.245 | -7.703  | 6.653 | 1.00 | 0.00 |
| ATOM | 165 | HB3 GLN | 10 | -1.412 | -9.286  | 7.448 | 1.00 | 0.00 |
| ATOM | 166 | CG GLN  | 10 | -1.408 | -7.605  | 8.803 | 1.00 | 0.00 |
| ATOM | 167 | HG2 GLN | 10 | -1.260 | -8.264  | 9.658 | 1.00 | 0.00 |
| ATOM | 168 | HG3 GLN | 10 | -0.807 | -6.705  | 8.930 | 1.00 | 0.00 |
| ATOM | 169 | CD GLN  | 10 | -2.859 | -7.210  | 8.745 | 1.00 | 0.00 |



|      |     |      |     |    |        |         |        |      |      |
|------|-----|------|-----|----|--------|---------|--------|------|------|
| ATOM | 170 | OE1  | GLN | 10 | -3.228 | -6.213  | 8.145  | 1.00 | 0.00 |
| ATOM | 171 | NE2  | GLN | 10 | -3.698 | -8.025  | 9.358  | 1.00 | 0.00 |
| ATOM | 172 | HE21 | GLN | 10 | -4.687 | -7.820  | 9.358  | 1.00 | 0.00 |
| ATOM | 173 | HE22 | GLN | 10 | -3.347 | -8.850  | 9.824  | 1.00 | 0.00 |
| ATOM | 174 | C    | GLN | 10 | 1.117  | -8.844  | 8.865  | 1.00 | 0.00 |
| ATOM | 175 | O    | GLN | 10 | 1.100  | -8.036  | 9.792  | 1.00 | 0.00 |
| ATOM | 176 | N    | GLN | 11 | 1.586  | -10.076 | 9.023  | 1.00 | 0.00 |
| ATOM | 177 | H    | GLN | 11 | 1.542  | -10.728 | 8.252  | 1.00 | 0.00 |
| ATOM | 178 | CA   | GLN | 11 | 2.116  | -10.539 | 10.279 | 1.00 | 0.00 |
| ATOM | 179 | HA   | GLN | 11 | 1.311  | -10.639 | 11.007 | 1.00 | 0.00 |
| ATOM | 180 | CB   | GLN | 11 | 2.785  | -11.897 | 10.103 | 1.00 | 0.00 |
| ATOM | 181 | HB2  | GLN | 11 | 2.457  | -12.334 | 9.159  | 1.00 | 0.00 |
| ATOM | 182 | HB3  | GLN | 11 | 3.866  | -11.759 | 10.083 | 1.00 | 0.00 |
| ATOM | 183 | CG   | GLN | 11 | 2.412  | -12.834 | 11.255 | 1.00 | 0.00 |
| ATOM | 184 | HG2  | GLN | 11 | 1.593  | -12.363 | 11.798 | 1.00 | 0.00 |
| ATOM | 185 | HG3  | GLN | 11 | 2.087  | -13.805 | 10.880 | 1.00 | 0.00 |
| ATOM | 186 | CD   | GLN | 11 | 3.568  | -13.046 | 12.211 | 1.00 | 0.00 |
| ATOM | 187 | OE1  | GLN | 11 | 4.722  | -13.085 | 11.843 | 1.00 | 0.00 |
| ATOM | 188 | NE2  | GLN | 11 | 3.228  | -13.238 | 13.475 | 1.00 | 0.00 |
| ATOM | 189 | HE21 | GLN | 11 | 3.945  | -13.387 | 14.171 | 1.00 | 0.00 |
| ATOM | 190 | HE22 | GLN | 11 | 2.253  | -13.236 | 13.738 | 1.00 | 0.00 |
| ATOM | 191 | C    | GLN | 11 | 3.104  | -9.538  | 10.847 | 1.00 | 0.00 |

|      |     |     |     |    |       |         |        |      |      |
|------|-----|-----|-----|----|-------|---------|--------|------|------|
| ATOM | 192 | O   | GLN | 11 | 2.905 | -9.023  | 11.943 | 1.00 | 0.00 |
| ATOM | 193 | N   | GLU | 12 | 4.094 | -9.169  | 10.033 | 1.00 | 0.00 |
| ATOM | 194 | H   | GLU | 12 | 4.164 | -9.582  | 9.114  | 1.00 | 0.00 |
| ATOM | 195 | CA  | GLU | 12 | 5.138 | -8.254  | 10.458 | 1.00 | 0.00 |
| ATOM | 196 | HA  | GLU | 12 | 4.691 | -7.282  | 10.667 | 1.00 | 0.00 |
| ATOM | 197 | CB  | GLU | 12 | 5.864 | -8.742  | 11.721 | 1.00 | 0.00 |
| ATOM | 198 | HB2 | GLU | 12 | 6.888 | -8.369  | 11.695 | 1.00 | 0.00 |
| ATOM | 199 | HB3 | GLU | 12 | 5.351 | -8.334  | 12.592 | 1.00 | 0.00 |
| ATOM | 200 | CG  | GLU | 12 | 5.880 | -10.271 | 11.809 | 1.00 | 0.00 |
| ATOM | 201 | HG2 | GLU | 12 | 4.981 | -10.637 | 12.305 | 1.00 | 0.00 |
| ATOM | 202 | HG3 | GLU | 12 | 5.899 | -10.632 | 10.780 | 1.00 | 0.00 |
| ATOM | 203 | CD  | GLU | 12 | 7.106 | -10.779 | 12.545 | 1.00 | 0.00 |
| ATOM | 204 | OE1 | GLU | 12 | 8.156 | -10.918 | 11.877 | 1.00 | 0.00 |
| ATOM | 205 | OE2 | GLU | 12 | 6.995 | -10.970 | 13.780 | 1.00 | 0.00 |
| ATOM | 206 | C   | GLU | 12 | 6.124 | -8.014  | 9.323  | 1.00 | 0.00 |
| ATOM | 207 | O   | GLU | 12 | 7.309 | -7.778  | 9.529  | 1.00 | 0.00 |
| ATOM | 208 | N   | GLN | 13 | 5.615 | -8.031  | 8.092  | 1.00 | 0.00 |
| ATOM | 209 | H   | GLN | 13 | 4.638 | -8.252  | 7.960  | 1.00 | 0.00 |
| ATOM | 210 | CA  | GLN | 13 | 6.432 | -7.818  | 6.922  | 1.00 | 0.00 |
| ATOM | 211 | HA  | GLN | 13 | 7.176 | -7.049  | 7.128  | 1.00 | 0.00 |
| ATOM | 212 | CB  | GLN | 13 | 7.158 | -9.107  | 6.527  | 1.00 | 0.00 |
| ATOM | 213 | HB2 | GLN | 13 | 6.579 | -9.961  | 6.880  | 1.00 | 0.00 |

|      |     |      |     |    |        |         |       |      |      |
|------|-----|------|-----|----|--------|---------|-------|------|------|
| ATOM | 214 | HB3  | GLN | 13 | 7.240  | -9.148  | 5.441 | 1.00 | 0.00 |
| ATOM | 215 | CG   | GLN | 13 | 8.554  | -9.149  | 7.144 | 1.00 | 0.00 |
| ATOM | 216 | HG2  | GLN | 13 | 9.038  | -8.173  | 7.135 | 1.00 | 0.00 |
| ATOM | 217 | HG3  | GLN | 13 | 8.424  | -9.480  | 8.174 | 1.00 | 0.00 |
| ATOM | 218 | CD   | GLN | 13 | 9.450  | -10.141 | 6.426 | 1.00 | 0.00 |
| ATOM | 219 | OE1  | GLN | 13 | 9.373  | -10.366 | 5.227 | 1.00 | 0.00 |
| ATOM | 220 | NE2  | GLN | 13 | 10.387 | -10.706 | 7.170 | 1.00 | 0.00 |
| ATOM | 221 | HE21 | GLN | 13 | 11.019 | -11.377 | 6.757 | 1.00 | 0.00 |
| ATOM | 222 | HE22 | GLN | 13 | 10.465 | -10.464 | 8.147 | 1.00 | 0.00 |
| ATOM | 223 | C    | GLN | 13 | 5.590  | -7.295  | 5.790 | 1.00 | 0.00 |
| ATOM | 224 | O    | GLN | 13 | 5.609  | -7.831  | 4.721 | 1.00 | 0.00 |
| ATOM | 225 | N    | HIE | 14 | 4.806  | -6.249  | 6.044 | 1.00 | 0.00 |
| ATOM | 226 | H    | HIE | 14 | 4.786  | -5.884  | 6.985 | 1.00 | 0.00 |
| ATOM | 227 | CA   | HIE | 14 | 3.911  | -5.670  | 5.064 | 1.00 | 0.00 |
| ATOM | 228 | HA   | HIE | 14 | 3.303  | -6.456  | 4.616 | 1.00 | 0.00 |
| ATOM | 229 | CB   | HIE | 14 | 2.981  | -4.641  | 5.713 | 1.00 | 0.00 |
| ATOM | 230 | HB2  | HIE | 14 | 3.443  | -3.654  | 5.718 | 1.00 | 0.00 |
| ATOM | 231 | HB3  | HIE | 14 | 2.060  | -4.608  | 5.130 | 1.00 | 0.00 |
| ATOM | 232 | CG   | HIE | 14 | 2.582  | -4.935  | 7.129 | 1.00 | 0.00 |
| ATOM | 233 | ND1  | HIE | 14 | 2.030  | -4.007  | 7.977 | 1.00 | 0.00 |
| ATOM | 234 | CE1  | HIE | 14 | 1.806  | -4.592  | 9.161 | 1.00 | 0.00 |
| ATOM | 235 | HE1  | HIE | 14 | 1.342  | -4.041  | 9.979 | 1.00 | 0.00 |

|      |     |          |    |       |        |        |      |      |
|------|-----|----------|----|-------|--------|--------|------|------|
| ATOM | 236 | NE2 HIE  | 14 | 2.239 | -5.853 | 9.089  | 1.00 | 0.00 |
| ATOM | 237 | HE2 HIE  | 14 | 2.224 | -6.525 | 9.843  | 1.00 | 0.00 |
| ATOM | 238 | CD2 HIE  | 14 | 2.710 | -6.099 | 7.828  | 1.00 | 0.00 |
| ATOM | 239 | HD2 HIE  | 14 | 3.087 | -7.089 | 7.570  | 1.00 | 0.00 |
| ATOM | 240 | C HIE    | 14 | 4.757 | -5.088 | 3.941  | 1.00 | 0.00 |
| ATOM | 241 | O HIE    | 14 | 5.867 | -5.499 | 3.643  | 1.00 | 0.00 |
| ATOM | 242 | N LEU    | 15 | 4.259 | -4.011 | 3.336  | 1.00 | 0.00 |
| ATOM | 243 | H LEU    | 15 | 3.330 | -3.692 | 3.569  | 1.00 | 0.00 |
| ATOM | 244 | CA LEU   | 15 | 4.962 | -3.346 | 2.263  | 1.00 | 0.00 |
| ATOM | 245 | HA LEU   | 15 | 5.962 | -3.765 | 2.156  | 1.00 | 0.00 |
| ATOM | 246 | CB LEU   | 15 | 4.207 | -3.537 | 0.941  | 1.00 | 0.00 |
| ATOM | 247 | HB2 LEU  | 15 | 3.379 | -2.834 | 1.028  | 1.00 | 0.00 |
| ATOM | 248 | HB3 LEU  | 15 | 4.844 | -3.245 | 0.106  | 1.00 | 0.00 |
| ATOM | 249 | CG LEU   | 15 | 3.657 | -4.945 | 0.695  | 1.00 | 0.00 |
| ATOM | 250 | HG LEU   | 15 | 2.801 | -5.108 | 1.350  | 1.00 | 0.00 |
| ATOM | 251 | CD1 LEU  | 15 | 3.224 | -5.112 | -0.757 | 1.00 | 0.00 |
| ATOM | 252 | HD11 LEU | 15 | 4.079 | -4.950 | -1.413 | 1.00 | 0.00 |
| ATOM | 253 | HD12 LEU | 15 | 2.837 | -6.120 | -0.908 | 1.00 | 0.00 |
| ATOM | 254 | HD13 LEU | 15 | 2.445 | -4.386 | -0.991 | 1.00 | 0.00 |
| ATOM | 255 | CD2 LEU  | 15 | 4.642 | -6.009 | 1.087  | 1.00 | 0.00 |
| ATOM | 256 | HD21 LEU | 15 | 4.876 | -5.916 | 2.147  | 1.00 | 0.00 |
| ATOM | 257 | HD22 LEU | 15 | 4.211 | -6.992 | 0.896  | 1.00 | 0.00 |

|      |     |      |     |    |       |        |       |      |      |
|------|-----|------|-----|----|-------|--------|-------|------|------|
| ATOM | 258 | HD23 | LEU | 15 | 5.555 | -5.893 | 0.502 | 1.00 | 0.00 |
| ATOM | 259 | C    | LEU | 15 | 5.189 | -1.896 | 2.619 | 1.00 | 0.00 |
| ATOM | 260 | O    | LEU | 15 | 4.596 | -1.398 | 3.582 | 1.00 | 0.00 |
| ATOM | 261 | N    | ARG | 16 | 6.001 | -1.206 | 1.817 | 1.00 | 0.00 |
| ATOM | 262 | H    | ARG | 16 | 6.416 | -1.664 | 1.018 | 1.00 | 0.00 |
| ATOM | 263 | CA   | ARG | 16 | 6.310 | 0.186  | 2.045 | 1.00 | 0.00 |
| ATOM | 264 | HA   | ARG | 16 | 5.451 | 0.679  | 2.501 | 1.00 | 0.00 |
| ATOM | 265 | CB   | ARG | 16 | 7.511 | 0.338  | 2.976 | 1.00 | 0.00 |
| ATOM | 266 | HB2  | ARG | 16 | 8.215 | -0.468 | 2.770 | 1.00 | 0.00 |
| ATOM | 267 | HB3  | ARG | 16 | 7.988 | 1.297  | 2.775 | 1.00 | 0.00 |
| ATOM | 268 | CG   | ARG | 16 | 7.083 | 0.279  | 4.443 | 1.00 | 0.00 |
| ATOM | 269 | HG2  | ARG | 16 | 6.012 | 0.082  | 4.486 | 1.00 | 0.00 |
| ATOM | 270 | HG3  | ARG | 16 | 7.621 | -0.534 | 4.931 | 1.00 | 0.00 |
| ATOM | 271 | CD   | ARG | 16 | 7.389 | 1.596  | 5.159 | 1.00 | 0.00 |
| ATOM | 272 | HD2  | ARG | 16 | 7.357 | 2.416  | 4.442 | 1.00 | 0.00 |
| ATOM | 273 | HD3  | ARG | 16 | 6.648 | 1.767  | 5.939 | 1.00 | 0.00 |
| ATOM | 274 | NE   | ARG | 16 | 8.728 | 1.561  | 5.778 | 1.00 | 0.00 |
| ATOM | 275 | HE   | ARG | 16 | 9.365 | 0.863  | 5.422 | 1.00 | 0.00 |
| ATOM | 276 | CZ   | ARG | 16 | 9.146 | 2.365  | 6.738 | 1.00 | 0.00 |
| ATOM | 277 | NH1  | ARG | 16 | 8.351 | 3.293  | 7.220 | 1.00 | 0.00 |
| ATOM | 278 | HH11 | ARG | 16 | 7.415 | 3.391  | 6.854 | 1.00 | 0.00 |
| ATOM | 279 | HH12 | ARG | 16 | 8.680 | 3.903  | 7.954 | 1.00 | 0.00 |

|      |     |      |     |    |        |        |        |      |      |
|------|-----|------|-----|----|--------|--------|--------|------|------|
| ATOM | 280 | NH2  | ARG | 16 | 10.356 | 2.241  | 7.226  | 1.00 | 0.00 |
| ATOM | 281 | HH21 | ARG | 16 | 10.972 | 1.526  | 6.865  | 1.00 | 0.00 |
| ATOM | 282 | HH22 | ARG | 16 | 10.667 | 2.860  | 7.960  | 1.00 | 0.00 |
| ATOM | 283 | C    | ARG | 16 | 6.632  | 0.840  | 0.750  | 1.00 | 0.00 |
| ATOM | 284 | O    | ARG | 16 | 5.814  | 1.575  | 0.267  | 1.00 | 0.00 |
| ATOM | 285 | N    | ALA | 17 | 7.768  | 0.553  | 0.152  | 1.00 | 0.00 |
| ATOM | 286 | H    | ALA | 17 | 8.428  | -0.036 | 0.639  | 1.00 | 0.00 |
| ATOM | 287 | CA   | ALA | 17 | 8.155  | 1.104  | -1.120 | 1.00 | 0.00 |
| ATOM | 288 | HA   | ALA | 17 | 8.312  | 2.176  | -1.005 | 1.00 | 0.00 |
| ATOM | 289 | CB   | ALA | 17 | 9.471  | 0.463  | -1.585 | 1.00 | 0.00 |
| ATOM | 290 | HB1  | ALA | 17 | 9.328  | -0.610 | -1.714 | 1.00 | 0.00 |
| ATOM | 291 | HB2  | ALA | 17 | 9.775  | 0.904  | -2.534 | 1.00 | 0.00 |
| ATOM | 292 | HB3  | ALA | 17 | 10.245 | 0.638  | -0.838 | 1.00 | 0.00 |
| ATOM | 293 | C    | ALA | 17 | 7.031  | 0.930  | -2.160 | 1.00 | 0.00 |
| ATOM | 294 | O    | ALA | 17 | 6.933  | 1.673  | -3.127 | 1.00 | 0.00 |
| ATOM | 295 | N    | CYX | 18 | 6.092  | 0.014  | -1.902 | 1.00 | 0.00 |
| ATOM | 296 | H    | CYX | 18 | 6.193  | -0.544 | -1.066 | 1.00 | 0.00 |
| ATOM | 297 | CA   | CYX | 18 | 4.995  | -0.260 | -2.768 | 1.00 | 0.00 |
| ATOM | 298 | HA   | CYX | 18 | 5.282  | -0.043 | -3.797 | 1.00 | 0.00 |
| ATOM | 299 | CB   | CYX | 18 | 4.574  | -1.721 | -2.679 | 1.00 | 0.00 |
| ATOM | 300 | HB2  | CYX | 18 | 5.384  | -2.307 | -2.244 | 1.00 | 0.00 |
| ATOM | 301 | HB3  | CYX | 18 | 3.687  | -1.807 | -2.052 | 1.00 | 0.00 |

|      |     |      |     |    |       |        |        |      |      |
|------|-----|------|-----|----|-------|--------|--------|------|------|
| ATOM | 302 | SG   | CYX | 18 | 4.212 | -2.516 | -4.262 | 1.00 | 0.00 |
| ATOM | 303 | C    | CYX | 18 | 3.881 | 0.674  | -2.389 | 1.00 | 0.00 |
| ATOM | 304 | O    | CYX | 18 | 3.325 | 1.372  | -3.219 | 1.00 | 0.00 |
| ATOM | 305 | N    | GLN | 19 | 3.552 | 0.720  | -1.101 | 1.00 | 0.00 |
| ATOM | 306 | H    | GLN | 19 | 3.985 | 0.071  | -0.460 | 1.00 | 0.00 |
| ATOM | 307 | CA   | GLN | 19 | 2.537 | 1.600  | -0.596 | 1.00 | 0.00 |
| ATOM | 308 | HA   | GLN | 19 | 1.819 | 1.837  | -1.381 | 1.00 | 0.00 |
| ATOM | 309 | CB   | GLN | 19 | 1.802 | 0.927  | 0.545  | 1.00 | 0.00 |
| ATOM | 310 | HB2  | GLN | 19 | 0.980 | 1.579  | 0.839  | 1.00 | 0.00 |
| ATOM | 311 | HB3  | GLN | 19 | 1.401 | -0.015 | 0.170  | 1.00 | 0.00 |
| ATOM | 312 | CG   | GLN | 19 | 2.691 | 0.655  | 1.752  | 1.00 | 0.00 |
| ATOM | 313 | HG2  | GLN | 19 | 2.511 | -0.361 | 2.105  | 1.00 | 0.00 |
| ATOM | 314 | HG3  | GLN | 19 | 3.737 | 0.759  | 1.464  | 1.00 | 0.00 |
| ATOM | 315 | CD   | GLN | 19 | 2.401 | 1.624  | 2.889  | 1.00 | 0.00 |
| ATOM | 316 | OE1  | GLN | 19 | 3.287 | 2.256  | 3.464  | 1.00 | 0.00 |
| ATOM | 317 | NE2  | GLN | 19 | 1.126 | 1.745  | 3.231  | 1.00 | 0.00 |
| ATOM | 318 | HE21 | GLN | 19 | 0.864 | 2.371  | 3.978  | 1.00 | 0.00 |
| ATOM | 319 | HE22 | GLN | 19 | 0.422 | 1.210  | 2.742  | 1.00 | 0.00 |
| ATOM | 320 | C    | GLN | 19 | 3.120 | 2.927  | -0.180 | 1.00 | 0.00 |
| ATOM | 321 | O    | GLN | 19 | 2.624 | 3.541  | 0.735  | 1.00 | 0.00 |
| ATOM | 322 | N    | GLN | 20 | 4.203 | 3.368  | -0.797 | 1.00 | 0.00 |
| ATOM | 323 | H    | GLN | 20 | 4.582 | 2.800  | -1.542 | 1.00 | 0.00 |

|      |     |      |     |    |       |       |        |      |      |
|------|-----|------|-----|----|-------|-------|--------|------|------|
| ATOM | 324 | CA   | GLN | 20 | 4.893 | 4.585 | -0.446 | 1.00 | 0.00 |
| ATOM | 325 | HA   | GLN | 20 | 4.247 | 5.179 | 0.200  | 1.00 | 0.00 |
| ATOM | 326 | CB   | GLN | 20 | 6.212 | 4.326 | 0.286  | 1.00 | 0.00 |
| ATOM | 327 | HB2  | GLN | 20 | 6.770 | 3.566 | -0.261 | 1.00 | 0.00 |
| ATOM | 328 | HB3  | GLN | 20 | 6.786 | 5.252 | 0.308  | 1.00 | 0.00 |
| ATOM | 329 | CG   | GLN | 20 | 5.964 | 3.844 | 1.723  | 1.00 | 0.00 |
| ATOM | 330 | HG2  | GLN | 20 | 5.002 | 3.334 | 1.784  | 1.00 | 0.00 |
| ATOM | 331 | HG3  | GLN | 20 | 6.762 | 3.145 | 1.976  | 1.00 | 0.00 |
| ATOM | 332 | CD   | GLN | 20 | 5.976 | 4.968 | 2.720  | 1.00 | 0.00 |
| ATOM | 333 | OE1  | GLN | 20 | 6.536 | 6.030 | 2.517  | 1.00 | 0.00 |
| ATOM | 334 | NE2  | GLN | 20 | 5.307 | 4.757 | 3.842  | 1.00 | 0.00 |
| ATOM | 335 | HE21 | GLN | 20 | 5.278 | 5.475 | 4.551  | 1.00 | 0.00 |
| ATOM | 336 | HE22 | GLN | 20 | 4.829 | 3.878 | 3.983  | 1.00 | 0.00 |
| ATOM | 337 | C    | GLN | 20 | 5.157 | 5.373 | -1.703 | 1.00 | 0.00 |
| ATOM | 338 | O    | GLN | 20 | 4.974 | 6.581 | -1.727 | 1.00 | 0.00 |
| ATOM | 339 | N    | TRP | 21 | 5.533 | 4.686 | -2.782 | 1.00 | 0.00 |
| ATOM | 340 | H    | TRP | 21 | 5.699 | 3.692 | -2.712 | 1.00 | 0.00 |
| ATOM | 341 | CA   | TRP | 21 | 5.778 | 5.335 | -4.052 | 1.00 | 0.00 |
| ATOM | 342 | HA   | TRP | 21 | 6.541 | 6.104 | -3.934 | 1.00 | 0.00 |
| ATOM | 343 | CB   | TRP | 21 | 6.265 | 4.319 | -5.084 | 1.00 | 0.00 |
| ATOM | 344 | HB2  | TRP | 21 | 6.767 | 4.832 | -5.904 | 1.00 | 0.00 |
| ATOM | 345 | HB3  | TRP | 21 | 6.968 | 3.646 | -4.593 | 1.00 | 0.00 |



|      |     |     |     |    |       |       |        |      |      |
|------|-----|-----|-----|----|-------|-------|--------|------|------|
| ATOM | 346 | CG  | TRP | 21 | 5.210 | 3.460 | -5.700 | 1.00 | 0.00 |
| ATOM | 347 | CD1 | TRP | 21 | 4.865 | 2.191 | -5.392 | 1.00 | 0.00 |
| ATOM | 348 | HD1 | TRP | 21 | 5.452 | 1.735 | -4.595 | 1.00 | 0.00 |
| ATOM | 349 | NE1 | TRP | 21 | 3.819 | 1.734 | -6.172 | 1.00 | 0.00 |
| ATOM | 350 | HE1 | TRP | 21 | 3.380 | 0.827 | -6.095 | 1.00 | 0.00 |
| ATOM | 351 | CE2 | TRP | 21 | 3.451 | 2.725 | -7.047 | 1.00 | 0.00 |
| ATOM | 352 | CZ2 | TRP | 21 | 2.464 | 2.800 | -8.028 | 1.00 | 0.00 |
| ATOM | 353 | HZ2 | TRP | 21 | 1.842 | 1.919 | -8.190 | 1.00 | 0.00 |
| ATOM | 354 | CH2 | TRP | 21 | 2.331 | 3.990 | -8.741 | 1.00 | 0.00 |
| ATOM | 355 | HH2 | TRP | 21 | 1.588 | 4.075 | -9.534 | 1.00 | 0.00 |
| ATOM | 356 | CZ3 | TRP | 21 | 3.147 | 5.094 | -8.452 | 1.00 | 0.00 |
| ATOM | 357 | HZ3 | TRP | 21 | 3.001 | 6.035 | -8.982 | 1.00 | 0.00 |
| ATOM | 358 | CE3 | TRP | 21 | 4.161 | 5.032 | -7.491 | 1.00 | 0.00 |
| ATOM | 359 | HE3 | TRP | 21 | 4.792 | 5.907 | -7.339 | 1.00 | 0.00 |
| ATOM | 360 | CD2 | TRP | 21 | 4.315 | 3.838 | -6.758 | 1.00 | 0.00 |
| ATOM | 361 | C   | TRP | 21 | 4.503 | 6.029 | -4.499 | 1.00 | 0.00 |
| ATOM | 362 | O   | TRP | 21 | 4.520 | 7.099 | -5.096 | 1.00 | 0.00 |
| ATOM | 363 | N   | ILE | 22 | 3.352 | 5.429 | -4.172 | 1.00 | 0.00 |
| ATOM | 364 | H   | ILE | 22 | 3.378 | 4.545 | -3.684 | 1.00 | 0.00 |
| ATOM | 365 | CA  | ILE | 22 | 2.063 | 5.969 | -4.543 | 1.00 | 0.00 |
| ATOM | 366 | HA  | ILE | 22 | 2.050 | 6.298 | -5.582 | 1.00 | 0.00 |
| ATOM | 367 | CB  | ILE | 22 | 0.968 | 4.917 | -4.327 | 1.00 | 0.00 |

|      |     |      |     |    |        |       |        |      |      |
|------|-----|------|-----|----|--------|-------|--------|------|------|
| ATOM | 368 | HB   | ILE | 22 | 0.914  | 4.669 | -3.267 | 1.00 | 0.00 |
| ATOM | 369 | CG2  | ILE | 22 | -0.386 | 5.461 | -4.793 | 1.00 | 0.00 |
| ATOM | 370 | HG21 | ILE | 22 | -0.333 | 5.708 | -5.853 | 1.00 | 0.00 |
| ATOM | 371 | HG22 | ILE | 22 | -1.156 | 4.705 | -4.635 | 1.00 | 0.00 |
| ATOM | 372 | HG23 | ILE | 22 | -0.634 | 6.356 | -4.223 | 1.00 | 0.00 |
| ATOM | 373 | CG1  | ILE | 22 | 1.314  | 3.616 | -5.058 | 1.00 | 0.00 |
| ATOM | 374 | HG12 | ILE | 22 | 1.049  | 3.728 | -6.110 | 1.00 | 0.00 |
| ATOM | 375 | HG13 | ILE | 22 | 2.387  | 3.444 | -4.970 | 1.00 | 0.00 |
| ATOM | 376 | CD1  | ILE | 22 | 0.559  | 2.429 | -4.468 | 1.00 | 0.00 |
| ATOM | 377 | HD11 | ILE | 22 | -0.514 | 2.600 | -4.556 | 1.00 | 0.00 |
| ATOM | 378 | HD12 | ILE | 22 | 0.827  | 1.521 | -5.010 | 1.00 | 0.00 |
| ATOM | 379 | HD13 | ILE | 22 | 0.823  | 2.315 | -3.417 | 1.00 | 0.00 |
| ATOM | 380 | C    | ILE | 22 | 1.816  | 7.220 | -3.724 | 1.00 | 0.00 |
| ATOM | 381 | O    | ILE | 22 | 1.178  | 8.158 | -4.178 | 1.00 | 0.00 |
| ATOM | 382 | N    | ARG | 23 | 2.338  | 7.258 | -2.492 | 1.00 | 0.00 |
| ATOM | 383 | H    | ARG | 23 | 2.797  | 6.434 | -2.129 | 1.00 | 0.00 |
| ATOM | 384 | CA   | ARG | 23 | 2.238  | 8.419 | -1.638 | 1.00 | 0.00 |
| ATOM | 385 | HA   | ARG | 23 | 1.200  | 8.749 | -1.594 | 1.00 | 0.00 |
| ATOM | 386 | CB   | ARG | 23 | 2.708  | 8.104 | -0.225 | 1.00 | 0.00 |
| ATOM | 387 | HB2  | ARG | 23 | 3.485  | 7.341 | -0.274 | 1.00 | 0.00 |
| ATOM | 388 | HB3  | ARG | 23 | 3.117  | 9.010 | 0.220  | 1.00 | 0.00 |
| ATOM | 389 | CG   | ARG | 23 | 1.551  | 7.596 | 0.629  | 1.00 | 0.00 |

|      |     |          |    |       |        |        |      |      |
|------|-----|----------|----|-------|--------|--------|------|------|
| ATOM | 390 | HG2 ARG  | 23 | 1.703 | 7.921  | 1.658  | 1.00 | 0.00 |
| ATOM | 391 | HG3 ARG  | 23 | 0.621 | 8.018  | 0.249  | 1.00 | 0.00 |
| ATOM | 392 | CD ARG   | 23 | 1.474 | 6.075  | 0.584  | 1.00 | 0.00 |
| ATOM | 393 | HD2 ARG  | 23 | 0.552 | 5.760  | 0.095  | 1.00 | 0.00 |
| ATOM | 394 | HD3 ARG  | 23 | 2.328 | 5.672  | 0.040  | 1.00 | 0.00 |
| ATOM | 395 | NE ARG   | 23 | 1.490 | 5.530  | 1.969  | 1.00 | 0.00 |
| ATOM | 396 | HE ARG   | 23 | 0.706 | 4.940  | 2.210  | 1.00 | 0.00 |
| ATOM | 397 | CZ ARG   | 23 | 2.448 | 5.684  | 2.847  | 1.00 | 0.00 |
| ATOM | 398 | NH1 ARG  | 23 | 3.475 | 6.437  | 2.545  | 1.00 | 0.00 |
| ATOM | 399 | HH11 ARG | 23 | 3.518 | 6.889  | 1.643  | 1.00 | 0.00 |
| ATOM | 400 | HH12 ARG | 23 | 4.220 | 6.562  | 3.215  | 1.00 | 0.00 |
| ATOM | 401 | NH2 ARG  | 23 | 2.347 | 5.164  | 4.044  | 1.00 | 0.00 |
| ATOM | 402 | HH21 ARG | 23 | 1.522 | 4.638  | 4.295  | 1.00 | 0.00 |
| ATOM | 403 | HH22 ARG | 23 | 3.094 | 5.291  | 4.711  | 1.00 | 0.00 |
| ATOM | 404 | C ARG    | 23 | 3.053 | 9.589  | -2.184 | 1.00 | 0.00 |
| ATOM | 405 | O ARG    | 23 | 2.839 | 10.736 | -1.791 | 1.00 | 0.00 |
| ATOM | 406 | N GLN    | 24 | 3.988 | 9.298  | -3.082 | 1.00 | 0.00 |
| ATOM | 407 | H GLN    | 24 | 4.175 | 8.332  | -3.311 | 1.00 | 0.00 |
| ATOM | 408 | CA GLN   | 24 | 4.794 | 10.315 | -3.704 | 1.00 | 0.00 |
| ATOM | 409 | HA GLN   | 24 | 5.011 | 11.108 | -2.988 | 1.00 | 0.00 |
| ATOM | 410 | CB GLN   | 24 | 6.114 | 9.718  | -4.185 | 1.00 | 0.00 |
| ATOM | 411 | HB2 GLN  | 24 | 5.988 | 8.644  | -4.322 | 1.00 | 0.00 |

|      |     |      |     |    |       |        |        |      |      |
|------|-----|------|-----|----|-------|--------|--------|------|------|
| ATOM | 412 | HB3  | GLN | 24 | 6.384 | 10.176 | -5.137 | 1.00 | 0.00 |
| ATOM | 413 | CG   | GLN | 24 | 7.223 | 9.974  | -3.164 | 1.00 | 0.00 |
| ATOM | 414 | HG2  | GLN | 24 | 7.940 | 10.679 | -3.584 | 1.00 | 0.00 |
| ATOM | 415 | HG3  | GLN | 24 | 6.778 | 10.401 | -2.266 | 1.00 | 0.00 |
| ATOM | 416 | CD   | GLN | 24 | 7.957 | 8.705  | -2.784 | 1.00 | 0.00 |
| ATOM | 417 | OE1  | GLN | 24 | 7.982 | 7.736  | -3.515 | 1.00 | 0.00 |
| ATOM | 418 | NE2  | GLN | 24 | 8.573 | 8.707  | -1.623 | 1.00 | 0.00 |
| ATOM | 419 | HE21 | GLN | 24 | 9.078 | 7.886  | -1.321 | 1.00 | 0.00 |
| ATOM | 420 | HE22 | GLN | 24 | 8.539 | 9.529  | -1.038 | 1.00 | 0.00 |
| ATOM | 421 | C    | GLN | 24 | 4.058 | 10.973 | -4.858 | 1.00 | 0.00 |
| ATOM | 422 | O    | GLN | 24 | 4.487 | 12.002 | -5.367 | 1.00 | 0.00 |
| ATOM | 423 | N    | GLN | 25 | 2.946 | 10.355 | -5.284 | 1.00 | 0.00 |
| ATOM | 424 | H    | GLN | 25 | 2.687 | 9.461  | -4.892 | 1.00 | 0.00 |
| ATOM | 425 | CA   | GLN | 25 | 2.136 | 10.896 | -6.348 | 1.00 | 0.00 |
| ATOM | 426 | HA   | GLN | 25 | 2.773 | 11.224 | -7.169 | 1.00 | 0.00 |
| ATOM | 427 | CB   | GLN | 25 | 1.169 | 9.831  | -6.874 | 1.00 | 0.00 |
| ATOM | 428 | HB2  | GLN | 25 | 1.262 | 8.933  | -6.264 | 1.00 | 0.00 |
| ATOM | 429 | HB3  | GLN | 25 | 0.150 | 10.211 | -6.807 | 1.00 | 0.00 |
| ATOM | 430 | CG   | GLN | 25 | 1.491 | 9.493  | -8.329 | 1.00 | 0.00 |
| ATOM | 431 | HG2  | GLN | 25 | 2.572 | 9.358  | -8.351 | 1.00 | 0.00 |
| ATOM | 432 | HG3  | GLN | 25 | 1.005 | 8.578  | -8.669 | 1.00 | 0.00 |
| ATOM | 433 | CD   | GLN | 25 | 1.123 | 10.620 | -9.278 | 1.00 | 0.00 |

|      |     |      |     |    |        |        |         |      |      |
|------|-----|------|-----|----|--------|--------|---------|------|------|
| ATOM | 434 | OE1  | GLN | 25 | 0.631  | 11.662 | -8.925  | 1.00 | 0.00 |
| ATOM | 435 | NE2  | GLN | 25 | 1.273  | 10.374 | -10.562 | 1.00 | 0.00 |
| ATOM | 436 | HE21 | GLN | 25 | 1.044  | 11.087 | -11.240 | 1.00 | 0.00 |
| ATOM | 437 | HE22 | GLN | 25 | 1.617  | 9.473  | -10.864 | 1.00 | 0.00 |
| ATOM | 438 | C    | GLN | 25 | 1.384  | 12.138 | -5.874  | 1.00 | 0.00 |
| ATOM | 439 | O    | GLN | 25 | 0.771  | 12.869 | -6.640  | 1.00 | 0.00 |
| ATOM | 440 | N    | LEU | 26 | 1.395  | 12.388 | -4.568  | 1.00 | 0.00 |
| ATOM | 441 | H    | LEU | 26 | 1.818  | 11.712 | -3.948  | 1.00 | 0.00 |
| ATOM | 442 | CA   | LEU | 26 | 0.720  | 13.516 | -3.988  | 1.00 | 0.00 |
| ATOM | 443 | HA   | LEU | 26 | 0.202  | 14.075 | -4.767  | 1.00 | 0.00 |
| ATOM | 444 | CB   | LEU | 26 | -0.311 | 13.054 | -2.947  | 1.00 | 0.00 |
| ATOM | 445 | HB2  | LEU | 26 | 0.204  | 13.154 | -1.992  | 1.00 | 0.00 |
| ATOM | 446 | HB3  | LEU | 26 | -1.161 | 13.735 | -2.975  | 1.00 | 0.00 |
| ATOM | 447 | CG   | LEU | 26 | -0.807 | 11.610 | -3.111  | 1.00 | 0.00 |
| ATOM | 448 | HG   | LEU | 26 | -0.692 | 11.310 | -4.153  | 1.00 | 0.00 |
| ATOM | 449 | CD1  | LEU | 26 | -0.007 | 10.672 | -2.224  | 1.00 | 0.00 |
| ATOM | 450 | HD11 | LEU | 26 | -0.122 | 10.970 | -1.182  | 1.00 | 0.00 |
| ATOM | 451 | HD12 | LEU | 26 | -0.371 | 9.652  | -2.352  | 1.00 | 0.00 |
| ATOM | 452 | HD13 | LEU | 26 | 1.046  | 10.719 | -2.501  | 1.00 | 0.00 |
| ATOM | 453 | CD2  | LEU | 26 | -2.297 | 11.509 | -2.789  | 1.00 | 0.00 |
| ATOM | 454 | HD21 | LEU | 26 | -2.860 | 12.152 | -3.465  | 1.00 | 0.00 |
| ATOM | 455 | HD22 | LEU | 26 | -2.627 | 10.477 | -2.912  | 1.00 | 0.00 |

|      |     |      |     |    |        |        |        |      |      |
|------|-----|------|-----|----|--------|--------|--------|------|------|
| ATOM | 456 | HD23 | LEU | 26 | -2.469 | 11.825 | -1.760 | 1.00 | 0.00 |
| ATOM | 457 | C    | LEU | 26 | 1.753  | 14.486 | -3.441 | 1.00 | 0.00 |
| ATOM | 458 | O    | LEU | 26 | 2.947  | 14.362 | -3.684 | 1.00 | 0.00 |
| ATOM | 459 | N    | ALA | 27 | 1.280  | 15.451 | -2.655 | 1.00 | 0.00 |
| ATOM | 460 | H    | ALA | 27 | 0.282  | 15.550 | -2.532 | 1.00 | 0.00 |
| ATOM | 461 | CA   | ALA | 27 | 2.151  | 16.427 | -2.028 | 1.00 | 0.00 |
| ATOM | 462 | HA   | ALA | 27 | 3.047  | 16.578 | -2.630 | 1.00 | 0.00 |
| ATOM | 463 | CB   | ALA | 27 | 1.404  | 17.751 | -1.926 | 1.00 | 0.00 |
| ATOM | 464 | HB1  | ALA | 27 | 0.509  | 17.618 | -1.319 | 1.00 | 0.00 |
| ATOM | 465 | HB2  | ALA | 27 | 2.049  | 18.498 | -1.463 | 1.00 | 0.00 |
| ATOM | 466 | HB3  | ALA | 27 | 1.119  | 18.086 | -2.924 | 1.00 | 0.00 |
| ATOM | 467 | C    | ALA | 27 | 2.627  | 15.913 | -0.672 | 1.00 | 0.00 |
| ATOM | 468 | O    | ALA | 27 | 3.066  | 16.680 | 0.180  | 1.00 | 0.00 |
| ATOM | 469 | N    | GLY | 28 | 2.483  | 14.600 | -0.439 | 1.00 | 0.00 |
| ATOM | 470 | H    | GLY | 28 | 2.056  | 14.023 | -1.150 | 1.00 | 0.00 |
| ATOM | 471 | CA   | GLY | 28 | 2.912  | 13.970 | 0.788  | 1.00 | 0.00 |
| ATOM | 472 | HA2  | GLY | 28 | 2.704  | 14.641 | 1.621  | 1.00 | 0.00 |
| ATOM | 473 | HA3  | GLY | 28 | 2.356  | 13.042 | 0.922  | 1.00 | 0.00 |
| ATOM | 474 | C    | GLY | 28 | 4.400  | 13.657 | 0.764  | 1.00 | 0.00 |
| ATOM | 475 | O    | GLY | 28 | 4.878  | 12.893 | 1.597  | 1.00 | 0.00 |
| ATOM | 476 | N    | SER | 29 | 5.120  | 14.202 | -0.217 | 1.00 | 0.00 |
| ATOM | 477 | H    | SER | 29 | 4.646  | 14.745 | -0.924 | 1.00 | 0.00 |

|      |     |     |     |    |        |        |        |      |      |
|------|-----|-----|-----|----|--------|--------|--------|------|------|
| ATOM | 478 | CA  | SER | 29 | 6.542  | 14.002 | -0.348 | 1.00 | 0.00 |
| ATOM | 479 | HA  | SER | 29 | 6.994  | 13.866 | 0.634  | 1.00 | 0.00 |
| ATOM | 480 | CB  | SER | 29 | 6.815  | 12.756 | -1.187 | 1.00 | 0.00 |
| ATOM | 481 | HB2 | SER | 29 | 6.565  | 11.889 | -0.575 | 1.00 | 0.00 |
| ATOM | 482 | HB3 | SER | 29 | 6.152  | 12.793 | -2.051 | 1.00 | 0.00 |
| ATOM | 483 | OG  | SER | 29 | 8.155  | 12.652 | -1.626 | 1.00 | 0.00 |
| ATOM | 484 | HG  | SER | 29 | 8.260  | 11.851 | -2.146 | 1.00 | 0.00 |
| ATOM | 485 | C   | SER | 29 | 7.214  | 15.209 | -0.959 | 1.00 | 0.00 |
| ATOM | 486 | O   | SER | 29 | 6.568  | 15.939 | -1.682 | 1.00 | 0.00 |
| ATOM | 487 | N   | PRO | 30 | 8.473  | 15.453 | -0.593 | 1.00 | 0.00 |
| ATOM | 488 | CD  | PRO | 30 | 9.256  | 14.642 | 0.323  | 1.00 | 0.00 |
| ATOM | 489 | HD2 | PRO | 30 | 9.426  | 13.673 | -0.147 | 1.00 | 0.00 |
| ATOM | 490 | HD3 | PRO | 30 | 8.673  | 14.506 | 1.234  | 1.00 | 0.00 |
| ATOM | 491 | CG  | PRO | 30 | 10.551 | 15.408 | 0.570  | 1.00 | 0.00 |
| ATOM | 492 | HG2 | PRO | 30 | 11.390 | 14.816 | 0.203  | 1.00 | 0.00 |
| ATOM | 493 | HG3 | PRO | 30 | 10.666 | 15.576 | 1.641  | 1.00 | 0.00 |
| ATOM | 494 | CB  | PRO | 30 | 10.432 | 16.736 | -0.182 | 1.00 | 0.00 |
| ATOM | 495 | HB2 | PRO | 30 | 11.334 | 16.954 | -0.754 | 1.00 | 0.00 |
| ATOM | 496 | HB3 | PRO | 30 | 10.231 | 17.557 | 0.506  | 1.00 | 0.00 |
| ATOM | 497 | CA  | PRO | 30 | 9.250  | 16.549 | -1.128 | 1.00 | 0.00 |
| ATOM | 498 | HA  | PRO | 30 | 8.639  | 17.450 | -1.079 | 1.00 | 0.00 |
| ATOM | 499 | C   | PRO | 30 | 9.678  | 16.309 | -2.555 | 1.00 | 0.00 |

|      |     |     |     |    |        |        |        |      |      |
|------|-----|-----|-----|----|--------|--------|--------|------|------|
| ATOM | 500 | O   | PRO | 30 | 9.352  | 15.278 | -3.132 | 1.00 | 0.00 |
| ATOM | 501 | N   | PHE | 31 | 10.447 | 17.253 | -3.109 | 1.00 | 0.00 |
| ATOM | 502 | H   | PHE | 31 | 10.718 | 18.060 | -2.566 | 1.00 | 0.00 |
| ATOM | 503 | CA  | PHE | 31 | 10.918 | 17.155 | -4.472 | 1.00 | 0.00 |
| ATOM | 504 | HA  | PHE | 31 | 11.173 | 16.126 | -4.726 | 1.00 | 0.00 |
| ATOM | 505 | CB  | PHE | 31 | 9.788  | 17.621 | -5.395 | 1.00 | 0.00 |
| ATOM | 506 | HB2 | PHE | 31 | 9.720  | 18.707 | -5.453 | 1.00 | 0.00 |
| ATOM | 507 | HB3 | PHE | 31 | 10.014 | 17.219 | -6.383 | 1.00 | 0.00 |
| ATOM | 508 | CG  | PHE | 31 | 8.405  | 17.119 | -5.029 | 1.00 | 0.00 |
| ATOM | 509 | CD1 | PHE | 31 | 7.998  | 15.830 | -5.408 | 1.00 | 0.00 |
| ATOM | 510 | HD1 | PHE | 31 | 8.660  | 15.212 | -6.016 | 1.00 | 0.00 |
| ATOM | 511 | CE1 | PHE | 31 | 6.747  | 15.335 | -5.009 | 1.00 | 0.00 |
| ATOM | 512 | HE1 | PHE | 31 | 6.455  | 14.317 | -5.268 | 1.00 | 0.00 |
| ATOM | 513 | CZ  | PHE | 31 | 5.874  | 16.149 | -4.278 | 1.00 | 0.00 |
| ATOM | 514 | HZ  | PHE | 31 | 4.882  | 15.786 | -4.007 | 1.00 | 0.00 |
| ATOM | 515 | CE2 | PHE | 31 | 6.280  | 17.438 | -3.893 | 1.00 | 0.00 |
| ATOM | 516 | HE2 | PHE | 31 | 5.599  | 18.071 | -3.324 | 1.00 | 0.00 |
| ATOM | 517 | CD2 | PHE | 31 | 7.554  | 17.911 | -4.238 | 1.00 | 0.00 |
| ATOM | 518 | HD2 | PHE | 31 | 7.883  | 18.891 | -3.893 | 1.00 | 0.00 |
| ATOM | 519 | C   | PHE | 31 | 12.136 | 18.035 | -4.692 | 1.00 | 0.00 |
| ATOM | 520 | O   | PHE | 31 | 12.270 | 19.079 | -4.050 | 1.00 | 0.00 |
| ATOM | 521 | N   | SER | 32 | 13.016 | 17.608 | -5.595 | 1.00 | 0.00 |



|      |     |     |     |    |        |        |         |      |      |
|------|-----|-----|-----|----|--------|--------|---------|------|------|
| ATOM | 522 | H   | SER | 32 | 12.876 | 16.718 | -6.053  | 1.00 | 0.00 |
| ATOM | 523 | CA  | SER | 32 | 14.214 | 18.363 | -5.911  | 1.00 | 0.00 |
| ATOM | 524 | HA  | SER | 32 | 14.115 | 19.384 | -5.544  | 1.00 | 0.00 |
| ATOM | 525 | CB  | SER | 32 | 15.443 | 17.720 | -5.250  | 1.00 | 0.00 |
| ATOM | 526 | HB2 | SER | 32 | 15.130 | 16.789 | -4.777  | 1.00 | 0.00 |
| ATOM | 527 | HB3 | SER | 32 | 16.176 | 17.503 | -6.027  | 1.00 | 0.00 |
| ATOM | 528 | OG  | SER | 32 | 16.023 | 18.570 | -4.280  | 1.00 | 0.00 |
| ATOM | 529 | HG  | SER | 32 | 16.785 | 18.136 | -3.890  | 1.00 | 0.00 |
| ATOM | 530 | C   | SER | 32 | 14.395 | 18.443 | -7.419  | 1.00 | 0.00 |
| ATOM | 531 | O   | SER | 32 | 14.036 | 19.440 | -8.045  | 1.00 | 0.00 |
| ATOM | 532 | N   | GLU | 33 | 14.948 | 17.375 | -8.003  | 1.00 | 0.00 |
| ATOM | 533 | H   | GLU | 33 | 15.276 | 16.609 | -7.433  | 1.00 | 0.00 |
| ATOM | 534 | CA  | GLU | 33 | 15.181 | 17.317 | -9.425  | 1.00 | 0.00 |
| ATOM | 535 | HA  | GLU | 33 | 15.376 | 18.319 | -9.807  | 1.00 | 0.00 |
| ATOM | 536 | CB  | GLU | 33 | 16.391 | 16.428 | -9.739  | 1.00 | 0.00 |
| ATOM | 537 | HB2 | GLU | 33 | 16.662 | 15.881 | -8.836  | 1.00 | 0.00 |
| ATOM | 538 | HB3 | GLU | 33 | 16.108 | 15.722 | -10.520 | 1.00 | 0.00 |
| ATOM | 539 | CG  | GLU | 33 | 17.583 | 17.255 | -10.209 | 1.00 | 0.00 |
| ATOM | 540 | HG2 | GLU | 33 | 17.702 | 17.115 | -11.284 | 1.00 | 0.00 |
| ATOM | 541 | HG3 | GLU | 33 | 17.389 | 18.306 | -9.999  | 1.00 | 0.00 |
| ATOM | 542 | CD  | GLU | 33 | 18.861 | 16.821 | -9.495  | 1.00 | 0.00 |
| ATOM | 543 | OE1 | GLU | 33 | 19.242 | 15.641 | -9.672  | 1.00 | 0.00 |

|      |     |      |     |    |        |        |         |      |      |
|------|-----|------|-----|----|--------|--------|---------|------|------|
| ATOM | 544 | OE2  | GLU | 33 | 19.432 | 17.674 | -8.783  | 1.00 | 0.00 |
| ATOM | 545 | C    | GLU | 33 | 13.925 | 16.846 | -10.148 | 1.00 | 0.00 |
| ATOM | 546 | O    | GLU | 33 | 12.842 | 16.752 | -9.563  | 1.00 | 0.00 |
| ATOM | 547 | N    | ASN | 34 | 14.077 | 16.521 | -11.437 | 1.00 | 0.00 |
| ATOM | 548 | H    | ASN | 34 | 14.975 | 16.646 | -11.881 | 1.00 | 0.00 |
| ATOM | 549 | CA   | ASN | 34 | 12.994 | 16.002 | -12.225 | 1.00 | 0.00 |
| ATOM | 550 | HA   | ASN | 34 | 12.044 | 16.395 | -11.863 | 1.00 | 0.00 |
| ATOM | 551 | CB   | ASN | 34 | 13.170 | 16.417 | -13.684 | 1.00 | 0.00 |
| ATOM | 552 | HB2  | ASN | 34 | 14.237 | 16.443 | -13.907 | 1.00 | 0.00 |
| ATOM | 553 | HB3  | ASN | 34 | 12.679 | 15.700 | -14.342 | 1.00 | 0.00 |
| ATOM | 554 | CG   | ASN | 34 | 12.588 | 17.789 | -13.944 | 1.00 | 0.00 |
| ATOM | 555 | OD1  | ASN | 34 | 11.520 | 18.144 | -13.474 | 1.00 | 0.00 |
| ATOM | 556 | ND2  | ASN | 34 | 13.304 | 18.565 | -14.734 | 1.00 | 0.00 |
| ATOM | 557 | HD21 | ASN | 34 | 12.978 | 19.495 | -14.953 | 1.00 | 0.00 |
| ATOM | 558 | HD22 | ASN | 34 | 14.175 | 18.225 | -15.117 | 1.00 | 0.00 |
| ATOM | 559 | C    | ASN | 34 | 12.951 | 14.492 | -12.144 | 1.00 | 0.00 |
| ATOM | 560 | O    | ASN | 34 | 13.997 | 13.846 | -12.087 | 1.00 | 0.00 |
| ATOM | 561 | N    | GLN | 35 | 11.751 | 13.928 | -12.236 | 1.00 | 0.00 |
| ATOM | 562 | H    | GLN | 35 | 10.933 | 14.519 | -12.278 | 1.00 | 0.00 |
| ATOM | 563 | CA   | GLN | 35 | 11.561 | 12.500 | -12.218 | 1.00 | 0.00 |
| ATOM | 564 | HA   | GLN | 35 | 12.063 | 12.054 | -13.077 | 1.00 | 0.00 |
| ATOM | 565 | CB   | GLN | 35 | 12.139 | 11.888 | -10.942 | 1.00 | 0.00 |

|      |     |      |     |    |        |        |         |      |      |
|------|-----|------|-----|----|--------|--------|---------|------|------|
| ATOM | 566 | HB2  | GLN | 35 | 12.919 | 12.549 | -10.566 | 1.00 | 0.00 |
| ATOM | 567 | HB3  | GLN | 35 | 11.340 | 11.813 | -10.204 | 1.00 | 0.00 |
| ATOM | 568 | CG   | GLN | 35 | 12.726 | 10.504 | -11.198 | 1.00 | 0.00 |
| ATOM | 569 | HG2  | GLN | 35 | 12.961 | 10.021 | -10.249 | 1.00 | 0.00 |
| ATOM | 570 | HG3  | GLN | 35 | 11.988 | 9.908  | -11.735 | 1.00 | 0.00 |
| ATOM | 571 | CD   | GLN | 35 | 13.994 | 10.576 | -12.034 | 1.00 | 0.00 |
| ATOM | 572 | OE1  | GLN | 35 | 15.036 | 11.036 | -11.611 | 1.00 | 0.00 |
| ATOM | 573 | NE2  | GLN | 35 | 13.888 | 10.085 | -13.258 | 1.00 | 0.00 |
| ATOM | 574 | HE21 | GLN | 35 | 14.688 | 10.097 | -13.875 | 1.00 | 0.00 |
| ATOM | 575 | HE22 | GLN | 35 | 13.008 | 9.700  | -13.570 | 1.00 | 0.00 |
| ATOM | 576 | C    | GLN | 35 | 10.094 | 12.180 | -12.351 | 1.00 | 0.00 |
| ATOM | 577 | O    | GLN | 35 | 9.250  | 13.033 | -12.072 | 1.00 | 0.00 |
| ATOM | 578 | N    | TRP | 36 | 9.798  | 10.923 | -12.730 | 1.00 | 0.00 |
| ATOM | 579 | H    | TRP | 36 | 10.540 | 10.282 | -12.973 | 1.00 | 0.00 |
| ATOM | 580 | CA   | TRP | 36 | 8.423  | 10.468 | -12.864 | 1.00 | 0.00 |
| ATOM | 581 | HA   | TRP | 36 | 7.967  | 10.926 | -13.742 | 1.00 | 0.00 |
| ATOM | 582 | CB   | TRP | 36 | 8.372  | 8.945  | -13.025 | 1.00 | 0.00 |
| ATOM | 583 | HB2  | TRP | 36 | 8.656  | 8.660  | -14.038 | 1.00 | 0.00 |
| ATOM | 584 | HB3  | TRP | 36 | 9.063  | 8.493  | -12.314 | 1.00 | 0.00 |
| ATOM | 585 | CG   | TRP | 36 | 7.025  | 8.329  | -12.766 | 1.00 | 0.00 |
| ATOM | 586 | CD1  | TRP | 36 | 6.343  | 8.249  | -11.590 | 1.00 | 0.00 |
| ATOM | 587 | HD1  | TRP | 36 | 6.850  | 8.678  | -10.726 | 1.00 | 0.00 |

|      |     |         |    |       |        |         |      |      |
|------|-----|---------|----|-------|--------|---------|------|------|
| ATOM | 588 | NE1 TRP | 36 | 5.119 | 7.622  | -11.751 | 1.00 | 0.00 |
| ATOM | 589 | HE1 TRP | 36 | 4.452 | 7.437  | -11.016 | 1.00 | 0.00 |
| ATOM | 590 | CE2 TRP | 36 | 4.968 | 7.272  | -13.072 | 1.00 | 0.00 |
| ATOM | 591 | CZ2 TRP | 36 | 3.940 | 6.617  | -13.751 | 1.00 | 0.00 |
| ATOM | 592 | HZ2 TRP | 36 | 3.060 | 6.314  | -13.184 | 1.00 | 0.00 |
| ATOM | 593 | CH2 TRP | 36 | 4.104 | 6.389  | -15.126 | 1.00 | 0.00 |
| ATOM | 594 | HH2 TRP | 36 | 3.325 | 5.881  | -15.695 | 1.00 | 0.00 |
| ATOM | 595 | CZ3 TRP | 36 | 5.270 | 6.810  | -15.791 | 1.00 | 0.00 |
| ATOM | 596 | HZ3 TRP | 36 | 5.386 | 6.627  | -16.860 | 1.00 | 0.00 |
| ATOM | 597 | CE3 TRP | 36 | 6.309 | 7.468  | -15.120 | 1.00 | 0.00 |
| ATOM | 598 | HE3 TRP | 36 | 7.193 | 7.761  | -15.686 | 1.00 | 0.00 |
| ATOM | 599 | CD2 TRP | 36 | 6.168 | 7.708  | -13.739 | 1.00 | 0.00 |
| ATOM | 600 | C TRP   | 36 | 7.620 | 10.930 | -11.640 | 1.00 | 0.00 |
| ATOM | 601 | O TRP   | 36 | 6.425 | 11.179 | -11.732 | 1.00 | 0.00 |
| ATOM | 602 | N GLY   | 37 | 8.298 | 11.028 | -10.484 | 1.00 | 0.00 |
| ATOM | 603 | H GLY   | 37 | 9.262 | 10.728 | -10.449 | 1.00 | 0.00 |
| ATOM | 604 | CA GLY  | 37 | 7.702 | 11.546 | -9.284  | 1.00 | 0.00 |
| ATOM | 605 | HA2 GLY | 37 | 7.258 | 12.518 | -9.496  | 1.00 | 0.00 |
| ATOM | 606 | HA3 GLY | 37 | 6.926 | 10.859 | -8.945  | 1.00 | 0.00 |
| ATOM | 607 | C GLY   | 37 | 8.735 | 11.704 | -8.186  | 1.00 | 0.00 |
| ATOM | 608 | O GLY   | 37 | 9.277 | 12.789 | -7.990  | 1.00 | 0.00 |
| ATOM | 609 | N PRO   | 38 | 9.034 | 10.595 | -7.492  | 1.00 | 0.00 |

|      |     |     |     |    |        |        |        |      |      |
|------|-----|-----|-----|----|--------|--------|--------|------|------|
| ATOM | 610 | CD  | PRO | 38 | 8.448  | 9.274  | -7.686 | 1.00 | 0.00 |
| ATOM | 611 | HD2 | PRO | 38 | 8.790  | 8.894  | -8.649 | 1.00 | 0.00 |
| ATOM | 612 | HD3 | PRO | 38 | 7.364  | 9.388  | -7.705 | 1.00 | 0.00 |
| ATOM | 613 | CG  | PRO | 38 | 8.923  | 8.416  | -6.515 | 1.00 | 0.00 |
| ATOM | 614 | HG2 | PRO | 38 | 9.533  | 7.597  | -6.896 | 1.00 | 0.00 |
| ATOM | 615 | HG3 | PRO | 38 | 8.056  | 8.010  | -5.993 | 1.00 | 0.00 |
| ATOM | 616 | CB  | PRO | 38 | 9.730  | 9.334  | -5.600 | 1.00 | 0.00 |
| ATOM | 617 | HB2 | PRO | 38 | 10.671 | 8.866  | -5.310 | 1.00 | 0.00 |
| ATOM | 618 | HB3 | PRO | 38 | 9.163  | 9.593  | -4.706 | 1.00 | 0.00 |
| ATOM | 619 | CA  | PRO | 38 | 10.006 | 10.583 | -6.420 | 1.00 | 0.00 |
| ATOM | 620 | HA  | PRO | 38 | 9.815  | 11.436 | -5.769 | 1.00 | 0.00 |
| ATOM | 621 | C   | PRO | 38 | 11.414 | 10.665 | -6.955 | 1.00 | 0.00 |
| ATOM | 622 | O   | PRO | 38 | 12.127 | 9.677  | -7.003 | 1.00 | 0.00 |
| ATOM | 623 | N   | GLN | 39 | 11.839 | 11.854 | -7.372 | 1.00 | 0.00 |
| ATOM | 624 | H   | GLN | 39 | 11.210 | 12.643 | -7.356 | 1.00 | 0.00 |
| ATOM | 625 | CA  | GLN | 39 | 13.166 | 12.047 | -7.909 | 1.00 | 0.00 |
| ATOM | 626 | HA  | GLN | 39 | 13.323 | 11.386 | -8.762 | 1.00 | 0.00 |
| ATOM | 627 | CB  | GLN | 39 | 13.340 | 13.498 | -8.375 | 1.00 | 0.00 |
| ATOM | 628 | HB2 | GLN | 39 | 12.519 | 13.763 | -9.042 | 1.00 | 0.00 |
| ATOM | 629 | HB3 | GLN | 39 | 13.332 | 14.158 | -7.508 | 1.00 | 0.00 |
| ATOM | 630 | CG  | GLN | 39 | 14.671 | 13.649 | -9.119 | 1.00 | 0.00 |
| ATOM | 631 | HG2 | GLN | 39 | 14.802 | 12.819 | -9.814 | 1.00 | 0.00 |

|      |     |      |     |    |        |        |        |      |      |
|------|-----|------|-----|----|--------|--------|--------|------|------|
| ATOM | 632 | HG3  | GLN | 39 | 14.633 | 14.586 | -9.675 | 1.00 | 0.00 |
| ATOM | 633 | CD   | GLN | 39 | 15.862 | 13.689 | -8.182 | 1.00 | 0.00 |
| ATOM | 634 | OE1  | GLN | 39 | 15.752 | 14.072 | -7.020 | 1.00 | 0.00 |
| ATOM | 635 | NE2  | GLN | 39 | 17.000 | 13.263 | -8.685 | 1.00 | 0.00 |
| ATOM | 636 | HE21 | GLN | 39 | 17.833 | 13.263 | -8.114 | 1.00 | 0.00 |
| ATOM | 637 | HE22 | GLN | 39 | 17.036 | 12.937 | -9.641 | 1.00 | 0.00 |
| ATOM | 638 | C    | GLN | 39 | 14.214 | 11.681 | -6.871 | 1.00 | 0.00 |
| ATOM | 639 | O    | GLN | 39 | 15.276 | 11.164 | -7.212 | 1.00 | 0.00 |
| ATOM | 640 | N    | GLN | 40 | 13.893 | 11.929 | -5.597 | 1.00 | 0.00 |
| ATOM | 641 | H    | GLN | 40 | 13.025 | 12.395 | -5.375 | 1.00 | 0.00 |
| ATOM | 642 | CA   | GLN | 40 | 14.790 | 11.606 | -4.518 | 1.00 | 0.00 |
| ATOM | 643 | HA   | GLN | 40 | 15.825 | 11.703 | -4.847 | 1.00 | 0.00 |
| ATOM | 644 | CB   | GLN | 40 | 14.556 | 12.564 | -3.351 | 1.00 | 0.00 |
| ATOM | 645 | HB2  | GLN | 40 | 14.336 | 13.557 | -3.743 | 1.00 | 0.00 |
| ATOM | 646 | HB3  | GLN | 40 | 13.709 | 12.210 | -2.764 | 1.00 | 0.00 |
| ATOM | 647 | CG   | GLN | 40 | 15.803 | 12.631 | -2.460 | 1.00 | 0.00 |
| ATOM | 648 | HG2  | GLN | 40 | 16.630 | 12.213 | -3.035 | 1.00 | 0.00 |
| ATOM | 649 | HG3  | GLN | 40 | 16.034 | 13.661 | -2.188 | 1.00 | 0.00 |
| ATOM | 650 | CD   | GLN | 40 | 15.637 | 11.815 | -1.182 | 1.00 | 0.00 |
| ATOM | 651 | OE1  | GLN | 40 | 14.561 | 11.369 | -0.803 | 1.00 | 0.00 |
| ATOM | 652 | NE2  | GLN | 40 | 16.735 | 11.654 | -0.464 | 1.00 | 0.00 |
| ATOM | 653 | HE21 | GLN | 40 | 16.700 | 11.124 | 0.395  | 1.00 | 0.00 |

|      |     |      |     |    |        |        |        |      |      |
|------|-----|------|-----|----|--------|--------|--------|------|------|
| ATOM | 654 | HE22 | GLN | 40 | 17.604 | 12.061 | -0.778 | 1.00 | 0.00 |
| ATOM | 655 | C    | GLN | 40 | 14.617 | 10.154 | -4.079 | 1.00 | 0.00 |
| ATOM | 656 | O    | GLN | 40 | 15.340 | 9.661  | -3.223 | 1.00 | 0.00 |
| ATOM | 657 | N    | GLY | 41 | 13.636 | 9.461  | -4.658 | 1.00 | 0.00 |
| ATOM | 658 | H    | GLY | 41 | 13.045 | 9.934  | -5.326 | 1.00 | 0.00 |
| ATOM | 659 | CA   | GLY | 41 | 13.375 | 8.069  | -4.379 | 1.00 | 0.00 |
| ATOM | 660 | HA2  | GLY | 41 | 14.307 | 7.583  | -4.091 | 1.00 | 0.00 |
| ATOM | 661 | HA3  | GLY | 41 | 12.660 | 7.998  | -3.560 | 1.00 | 0.00 |
| ATOM | 662 | C    | GLY | 41 | 12.806 | 7.363  | -5.592 | 1.00 | 0.00 |
| ATOM | 663 | O    | GLY | 41 | 11.682 | 6.904  | -5.587 | 1.00 | 0.00 |
| ATOM | 664 | N    | PRO | 42 | 13.559 | 7.293  | -6.689 | 1.00 | 0.00 |
| ATOM | 665 | CD   | PRO | 42 | 14.900 | 7.822  | -6.827 | 1.00 | 0.00 |
| ATOM | 666 | HD2  | PRO | 42 | 15.558 | 7.245  | -6.177 | 1.00 | 0.00 |
| ATOM | 667 | HD3  | PRO | 42 | 14.887 | 8.861  | -6.500 | 1.00 | 0.00 |
| ATOM | 668 | CG   | PRO | 42 | 15.263 | 7.681  | -8.302 | 1.00 | 0.00 |
| ATOM | 669 | HG2  | PRO | 42 | 16.113 | 7.004  | -8.396 | 1.00 | 0.00 |
| ATOM | 670 | HG3  | PRO | 42 | 15.534 | 8.660  | -8.696 | 1.00 | 0.00 |
| ATOM | 671 | CB   | PRO | 42 | 14.026 | 7.127  | -9.016 | 1.00 | 0.00 |
| ATOM | 672 | HB2  | PRO | 42 | 14.295 | 6.297  | -9.669 | 1.00 | 0.00 |
| ATOM | 673 | HB3  | PRO | 42 | 13.521 | 7.898  | -9.598 | 1.00 | 0.00 |
| ATOM | 674 | CA   | PRO | 42 | 13.109 | 6.633  | -7.901 | 1.00 | 0.00 |
| ATOM | 675 | HA   | PRO | 42 | 12.096 | 6.971  | -8.119 | 1.00 | 0.00 |

|      |     |     |     |    |        |       |        |      |      |
|------|-----|-----|-----|----|--------|-------|--------|------|------|
| ATOM | 676 | C   | PRO | 42 | 13.118 | 5.127 | -7.760 | 1.00 | 0.00 |
| ATOM | 677 | O   | PRO | 42 | 12.279 | 4.436 | -8.351 | 1.00 | 0.00 |
| ATOM | 678 | N   | SER | 43 | 14.053 | 4.629 | -6.958 | 1.00 | 0.00 |
| ATOM | 679 | H   | SER | 43 | 14.715 | 5.260 | -6.531 | 1.00 | 0.00 |
| ATOM | 680 | CA  | SER | 43 | 14.201 | 3.214 | -6.714 | 1.00 | 0.00 |
| ATOM | 681 | HA  | SER | 43 | 14.098 | 2.671 | -7.654 | 1.00 | 0.00 |
| ATOM | 682 | CB  | SER | 43 | 15.573 | 2.895 | -6.113 | 1.00 | 0.00 |
| ATOM | 683 | HB2 | SER | 43 | 15.471 | 2.842 | -5.029 | 1.00 | 0.00 |
| ATOM | 684 | HB3 | SER | 43 | 15.900 | 1.927 | -6.494 | 1.00 | 0.00 |
| ATOM | 685 | OG  | SER | 43 | 16.534 | 3.886 | -6.451 | 1.00 | 0.00 |
| ATOM | 686 | HG  | SER | 43 | 17.380 | 3.657 | -6.060 | 1.00 | 0.00 |
| ATOM | 687 | C   | SER | 43 | 13.085 | 2.734 | -5.793 | 1.00 | 0.00 |
| ATOM | 688 | O   | SER | 43 | 13.294 | 2.423 | -4.627 | 1.00 | 0.00 |
| ATOM | 689 | N   | LEU | 44 | 11.858 | 2.689 | -6.310 | 1.00 | 0.00 |
| ATOM | 690 | H   | LEU | 44 | 11.715 | 2.997 | -7.261 | 1.00 | 0.00 |
| ATOM | 691 | CA  | LEU | 44 | 10.713 | 2.266 | -5.552 | 1.00 | 0.00 |
| ATOM | 692 | HA  | LEU | 44 | 11.037 | 1.802 | -4.620 | 1.00 | 0.00 |
| ATOM | 693 | CB  | LEU | 44 | 9.823  | 3.463 | -5.219 | 1.00 | 0.00 |
| ATOM | 694 | HB2 | LEU | 44 | 10.041 | 4.209 | -5.983 | 1.00 | 0.00 |
| ATOM | 695 | HB3 | LEU | 44 | 8.779  | 3.159 | -5.296 | 1.00 | 0.00 |
| ATOM | 696 | CG  | LEU | 44 | 10.081 | 4.065 | -3.827 | 1.00 | 0.00 |
| ATOM | 697 | HG  | LEU | 44 | 11.072 | 3.760 | -3.492 | 1.00 | 0.00 |



|      |     |          |    |        |       |         |      |      |
|------|-----|----------|----|--------|-------|---------|------|------|
| ATOM | 698 | CD1 LEU  | 44 | 10.005 | 5.573 | -3.867  | 1.00 | 0.00 |
| ATOM | 699 | HD11 LEU | 44 | 9.014  | 5.878 | -4.202  | 1.00 | 0.00 |
| ATOM | 700 | HD12 LEU | 44 | 10.191 | 5.973 | -2.871  | 1.00 | 0.00 |
| ATOM | 701 | HD13 LEU | 44 | 10.755 | 5.957 | -4.558  | 1.00 | 0.00 |
| ATOM | 702 | CD2 LEU  | 44 | 9.094  | 3.537 | -2.808  | 1.00 | 0.00 |
| ATOM | 703 | HD21 LEU | 44 | 9.187  | 2.453 | -2.739  | 1.00 | 0.00 |
| ATOM | 704 | HD22 LEU | 44 | 9.303  | 3.981 | -1.835  | 1.00 | 0.00 |
| ATOM | 705 | HD23 LEU | 44 | 8.081  | 3.795 | -3.115  | 1.00 | 0.00 |
| ATOM | 706 | C LEU    | 44 | 9.985  | 1.239 | -6.358  | 1.00 | 0.00 |
| ATOM | 707 | O LEU    | 44 | 9.571  | 0.271 | -5.792  | 1.00 | 0.00 |
| ATOM | 708 | N ARG    | 45 | 9.821  | 1.411 | -7.665  | 1.00 | 0.00 |
| ATOM | 709 | H ARG    | 45 | 10.190 | 2.252 | -8.084  | 1.00 | 0.00 |
| ATOM | 710 | CA ARG   | 45 | 9.147  | 0.460 | -8.518  | 1.00 | 0.00 |
| ATOM | 711 | HA ARG   | 45 | 8.134  | 0.291 | -8.152  | 1.00 | 0.00 |
| ATOM | 712 | CB ARG   | 45 | 9.067  | 0.981 | -9.949  | 1.00 | 0.00 |
| ATOM | 713 | HB2 ARG  | 45 | 10.069 | 1.262 | -10.274 | 1.00 | 0.00 |
| ATOM | 714 | HB3 ARG  | 45 | 8.689  | 0.183 | -10.589 | 1.00 | 0.00 |
| ATOM | 715 | CG ARG   | 45 | 8.144  | 2.190 | -10.045 | 1.00 | 0.00 |
| ATOM | 716 | HG2 ARG  | 45 | 8.653  | 3.048 | -9.606  | 1.00 | 0.00 |
| ATOM | 717 | HG3 ARG  | 45 | 7.943  | 2.387 | -11.098 | 1.00 | 0.00 |
| ATOM | 718 | CD ARG   | 45 | 6.816  | 1.949 | -9.306  | 1.00 | 0.00 |
| ATOM | 719 | HD2 ARG  | 45 | 6.584  | 0.884 | -9.307  | 1.00 | 0.00 |

|      |     |      |     |    |        |        |         |      |      |
|------|-----|------|-----|----|--------|--------|---------|------|------|
| ATOM | 720 | HD3  | ARG | 45 | 6.899  | 2.301  | -8.278  | 1.00 | 0.00 |
| ATOM | 721 | NE   | ARG | 45 | 5.717  | 2.671  | -9.964  | 1.00 | 0.00 |
| ATOM | 722 | HE   | ARG | 45 | 4.978  | 2.108  | -10.361 | 1.00 | 0.00 |
| ATOM | 723 | CZ   | ARG | 45 | 5.615  | 3.985  | -10.036 | 1.00 | 0.00 |
| ATOM | 724 | NH1  | ARG | 45 | 6.520  | 4.759  | -9.474  | 1.00 | 0.00 |
| ATOM | 725 | HH11 | ARG | 45 | 7.300  | 4.345  | -8.983  | 1.00 | 0.00 |
| ATOM | 726 | HH12 | ARG | 45 | 6.430  | 5.763  | -9.537  | 1.00 | 0.00 |
| ATOM | 727 | NH2  | ARG | 45 | 4.627  | 4.532  | -10.705 | 1.00 | 0.00 |
| ATOM | 728 | HH21 | ARG | 45 | 3.946  | 3.944  | -11.164 | 1.00 | 0.00 |
| ATOM | 729 | HH22 | ARG | 45 | 4.553  | 5.538  | -10.758 | 1.00 | 0.00 |
| ATOM | 730 | C    | ARG | 45 | 9.880  | -0.839 | -8.537  | 1.00 | 0.00 |
| ATOM | 731 | O    | ARG | 45 | 9.403  | -1.789 | -7.990  | 1.00 | 0.00 |
| ATOM | 732 | N    | GLU | 46 | 11.081 | -0.876 | -9.077  | 1.00 | 0.00 |
| ATOM | 733 | H    | GLU | 46 | 11.459 | -0.036 | -9.490  | 1.00 | 0.00 |
| ATOM | 734 | CA   | GLU | 46 | 11.876 | -2.092 | -9.138  | 1.00 | 0.00 |
| ATOM | 735 | HA   | GLU | 46 | 11.362 | -2.842 | -9.739  | 1.00 | 0.00 |
| ATOM | 736 | CB   | GLU | 46 | 13.240 | -1.803 | -9.776  | 1.00 | 0.00 |
| ATOM | 737 | HB2  | GLU | 46 | 13.706 | -0.971 | -9.249  | 1.00 | 0.00 |
| ATOM | 738 | HB3  | GLU | 46 | 13.868 | -2.689 | -9.681  | 1.00 | 0.00 |
| ATOM | 739 | CG   | GLU | 46 | 13.082 | -1.445 | -11.259 | 1.00 | 0.00 |
| ATOM | 740 | HG2  | GLU | 46 | 12.844 | -2.362 | -11.799 | 1.00 | 0.00 |
| ATOM | 741 | HG3  | GLU | 46 | 12.268 | -0.731 | -11.382 | 1.00 | 0.00 |

|      |     |      |     |    |        |        |         |      |      |
|------|-----|------|-----|----|--------|--------|---------|------|------|
| ATOM | 742 | CD   | GLU | 46 | 14.373 | -0.847 | -11.815 | 1.00 | 0.00 |
| ATOM | 743 | OE1  | GLU | 46 | 14.875 | 0.113  | -11.185 | 1.00 | 0.00 |
| ATOM | 744 | OE2  | GLU | 46 | 14.825 | -1.338 | -12.869 | 1.00 | 0.00 |
| ATOM | 745 | C    | GLU | 46 | 12.069 | -2.679 | -7.740  | 1.00 | 0.00 |
| ATOM | 746 | O    | GLU | 46 | 12.348 | -3.866 | -7.599  | 1.00 | 0.00 |
| ATOM | 747 | N    | GLN | 47 | 11.884 | -1.843 | -6.706  | 1.00 | 0.00 |
| ATOM | 748 | H    | GLN | 47 | 11.705 | -0.867 | -6.891  | 1.00 | 0.00 |
| ATOM | 749 | CA   | GLN | 47 | 11.983 | -2.267 | -5.346  | 1.00 | 0.00 |
| ATOM | 750 | HA   | GLN | 47 | 12.749 | -3.037 | -5.252  | 1.00 | 0.00 |
| ATOM | 751 | CB   | GLN | 47 | 12.361 | -1.093 | -4.453  | 1.00 | 0.00 |
| ATOM | 752 | HB2  | GLN | 47 | 12.314 | -0.173 | -5.035  | 1.00 | 0.00 |
| ATOM | 753 | HB3  | GLN | 47 | 11.656 | -1.035 | -3.624  | 1.00 | 0.00 |
| ATOM | 754 | CG   | GLN | 47 | 13.781 | -1.278 | -3.904  | 1.00 | 0.00 |
| ATOM | 755 | HG2  | GLN | 47 | 13.859 | -2.260 | -3.436  | 1.00 | 0.00 |
| ATOM | 756 | HG3  | GLN | 47 | 14.511 | -1.202 | -4.710  | 1.00 | 0.00 |
| ATOM | 757 | CD   | GLN | 47 | 14.096 | -0.216 | -2.861  | 1.00 | 0.00 |
| ATOM | 758 | OE1  | GLN | 47 | 15.055 | 0.533  | -2.962  | 1.00 | 0.00 |
| ATOM | 759 | NE2  | GLN | 47 | 13.270 | -0.165 | -1.827  | 1.00 | 0.00 |
| ATOM | 760 | HE21 | GLN | 47 | 13.421 | 0.516  | -1.097  | 1.00 | 0.00 |
| ATOM | 761 | HE22 | GLN | 47 | 12.493 | -0.808 | -1.773  | 1.00 | 0.00 |
| ATOM | 762 | C    | GLN | 47 | 10.695 | -2.880 | -4.890  | 1.00 | 0.00 |
| ATOM | 763 | O    | GLN | 47 | 10.745 | -3.978 | -4.424  | 1.00 | 0.00 |

|      |     |     |     |    |       |        |        |      |      |
|------|-----|-----|-----|----|-------|--------|--------|------|------|
| ATOM | 764 | N   | CYX | 48 | 9.560 | -2.224 | -5.027 | 1.00 | 0.00 |
| ATOM | 765 | H   | CYX | 48 | 9.649 | -1.296 | -5.415 | 1.00 | 0.00 |
| ATOM | 766 | CA  | CYX | 48 | 8.260 | -2.678 | -4.650 | 1.00 | 0.00 |
| ATOM | 767 | HA  | CYX | 48 | 8.300 | -3.039 | -3.622 | 1.00 | 0.00 |
| ATOM | 768 | CB  | CYX | 48 | 7.208 | -1.583 | -4.740 | 1.00 | 0.00 |
| ATOM | 769 | HB2 | CYX | 48 | 6.905 | -1.287 | -3.736 | 1.00 | 0.00 |
| ATOM | 770 | HB3 | CYX | 48 | 7.623 | -0.722 | -5.263 | 1.00 | 0.00 |
| ATOM | 771 | SG  | CYX | 48 | 5.673 | -2.013 | -5.597 | 1.00 | 0.00 |
| ATOM | 772 | C   | CYX | 48 | 7.884 | -3.823 | -5.532 | 1.00 | 0.00 |
| ATOM | 773 | O   | CYX | 48 | 7.426 | -4.828 | -5.064 | 1.00 | 0.00 |
| ATOM | 774 | N   | CYX | 49 | 8.113 | -3.736 | -6.834 | 1.00 | 0.00 |
| ATOM | 775 | H   | CYX | 49 | 8.473 | -2.854 | -7.168 | 1.00 | 0.00 |
| ATOM | 776 | CA  | CYX | 49 | 7.843 | -4.771 | -7.797 | 1.00 | 0.00 |
| ATOM | 777 | HA  | CYX | 49 | 6.765 | -4.910 | -7.875 | 1.00 | 0.00 |
| ATOM | 778 | CB  | CYX | 49 | 8.395 | -4.427 | -9.187 | 1.00 | 0.00 |
| ATOM | 779 | HB2 | CYX | 49 | 9.476 | -4.300 | -9.128 | 1.00 | 0.00 |
| ATOM | 780 | HB3 | CYX | 49 | 8.163 | -5.235 | -9.881 | 1.00 | 0.00 |
| ATOM | 781 | SG  | CYX | 49 | 7.774 | -2.896 | -9.940 | 1.00 | 0.00 |
| ATOM | 782 | C   | CYX | 49 | 8.449 | -6.071 | -7.278 | 1.00 | 0.00 |
| ATOM | 783 | O   | CYX | 49 | 7.999 | -7.145 | -7.648 | 1.00 | 0.00 |
| ATOM | 784 | N   | ASN | 50 | 9.481 | -5.975 | -6.427 | 1.00 | 0.00 |
| ATOM | 785 | H   | ASN | 50 | 9.853 | -5.059 | -6.222 | 1.00 | 0.00 |

|      |     |      |     |    |        |        |        |      |      |
|------|-----|------|-----|----|--------|--------|--------|------|------|
| ATOM | 786 | CA   | ASN | 50 | 10.069 | -7.104 | -5.782 | 1.00 | 0.00 |
| ATOM | 787 | HA   | ASN | 50 | 9.804  | -8.023 | -6.305 | 1.00 | 0.00 |
| ATOM | 788 | CB   | ASN | 50 | 11.585 | -6.955 | -5.798 | 1.00 | 0.00 |
| ATOM | 789 | HB2  | ASN | 50 | 11.867 | -5.938 | -6.071 | 1.00 | 0.00 |
| ATOM | 790 | HB3  | ASN | 50 | 11.969 | -7.184 | -4.804 | 1.00 | 0.00 |
| ATOM | 791 | CG   | ASN | 50 | 12.209 | -7.911 | -6.788 | 1.00 | 0.00 |
| ATOM | 792 | OD1  | ASN | 50 | 12.777 | -8.935 | -6.440 | 1.00 | 0.00 |
| ATOM | 793 | ND2  | ASN | 50 | 12.077 | -7.575 | -8.058 | 1.00 | 0.00 |
| ATOM | 794 | HD21 | ASN | 50 | 12.469 | -8.167 | -8.777 | 1.00 | 0.00 |
| ATOM | 795 | HD22 | ASN | 50 | 11.585 | -6.729 | -8.305 | 1.00 | 0.00 |
| ATOM | 796 | C    | ASN | 50 | 9.628  | -7.206 | -4.353 | 1.00 | 0.00 |
| ATOM | 797 | O    | ASN | 50 | 9.390  | -8.285 | -3.901 | 1.00 | 0.00 |
| ATOM | 798 | N    | GLU | 51 | 9.515  | -6.117 | -3.624 | 1.00 | 0.00 |
| ATOM | 799 | H    | GLU | 51 | 9.811  | -5.261 | -4.069 | 1.00 | 0.00 |
| ATOM | 800 | CA   | GLU | 51 | 9.099  | -6.062 | -2.251 | 1.00 | 0.00 |
| ATOM | 801 | HA   | GLU | 51 | 9.681  | -6.779 | -1.672 | 1.00 | 0.00 |
| ATOM | 802 | CB   | GLU | 51 | 9.303  | -4.666 | -1.651 | 1.00 | 0.00 |
| ATOM | 803 | HB2  | GLU | 51 | 9.876  | -4.766 | -0.729 | 1.00 | 0.00 |
| ATOM | 804 | HB3  | GLU | 51 | 9.864  | -4.062 | -2.364 | 1.00 | 0.00 |
| ATOM | 805 | CG   | GLU | 51 | 7.968  | -3.989 | -1.349 | 1.00 | 0.00 |
| ATOM | 806 | HG2  | GLU | 51 | 7.425  | -4.001 | -2.295 | 1.00 | 0.00 |
| ATOM | 807 | HG3  | GLU | 51 | 7.387  | -4.514 | -0.591 | 1.00 | 0.00 |

|      |     |      |     |    |       |        |        |      |      |
|------|-----|------|-----|----|-------|--------|--------|------|------|
| ATOM | 808 | CD   | GLU | 51 | 8.185 | -2.585 | -0.921 | 1.00 | 0.00 |
| ATOM | 809 | OE1  | GLU | 51 | 8.450 | -2.285 | 0.260  | 1.00 | 0.00 |
| ATOM | 810 | OE2  | GLU | 51 | 7.991 | -1.745 | -1.792 | 1.00 | 0.00 |
| ATOM | 811 | C    | GLU | 51 | 7.646 | -6.520 | -2.132 | 1.00 | 0.00 |
| ATOM | 812 | O    | GLU | 51 | 7.149 | -6.747 | -1.039 | 1.00 | 0.00 |
| ATOM | 813 | N    | LEU | 52 | 6.952 | -6.645 | -3.257 | 1.00 | 0.00 |
| ATOM | 814 | H    | LEU | 52 | 7.387 | -6.331 | -4.113 | 1.00 | 0.00 |
| ATOM | 815 | CA   | LEU | 52 | 5.584 | -7.057 | -3.303 | 1.00 | 0.00 |
| ATOM | 816 | HA   | LEU | 52 | 5.160 | -7.065 | -2.299 | 1.00 | 0.00 |
| ATOM | 817 | CB   | LEU | 52 | 4.776 | -6.079 | -4.169 | 1.00 | 0.00 |
| ATOM | 818 | HB2  | LEU | 52 | 3.896 | -5.909 | -3.549 | 1.00 | 0.00 |
| ATOM | 819 | HB3  | LEU | 52 | 5.322 | -5.143 | -4.288 | 1.00 | 0.00 |
| ATOM | 820 | CG   | LEU | 52 | 4.340 | -6.594 | -5.545 | 1.00 | 0.00 |
| ATOM | 821 | HG   | LEU | 52 | 3.973 | -5.745 | -6.122 | 1.00 | 0.00 |
| ATOM | 822 | CD1  | LEU | 52 | 5.469 | -7.261 | -6.294 | 1.00 | 0.00 |
| ATOM | 823 | HD11 | LEU | 52 | 5.836 | -8.111 | -5.718 | 1.00 | 0.00 |
| ATOM | 824 | HD12 | LEU | 52 | 5.108 | -7.608 | -7.262 | 1.00 | 0.00 |
| ATOM | 825 | HD13 | LEU | 52 | 6.279 | -6.547 | -6.443 | 1.00 | 0.00 |
| ATOM | 826 | CD2  | LEU | 52 | 3.140 | -7.507 | -5.421 | 1.00 | 0.00 |
| ATOM | 827 | HD21 | LEU | 52 | 2.311 | -6.960 | -4.972 | 1.00 | 0.00 |
| ATOM | 828 | HD22 | LEU | 52 | 2.848 | -7.861 | -6.410 | 1.00 | 0.00 |
| ATOM | 829 | HD23 | LEU | 52 | 3.395 | -8.360 | -4.792 | 1.00 | 0.00 |

|      |     |     |     |    |       |         |        |      |      |
|------|-----|-----|-----|----|-------|---------|--------|------|------|
| ATOM | 830 | C   | LEU | 52 | 5.533 | -8.513  | -3.735 | 1.00 | 0.00 |
| ATOM | 831 | O   | LEU | 52 | 4.539 | -9.173  | -3.489 | 1.00 | 0.00 |
| ATOM | 832 | N   | TYR | 53 | 6.592 | -8.994  | -4.397 | 1.00 | 0.00 |
| ATOM | 833 | H   | TYR | 53 | 7.409 | -8.407  | -4.478 | 1.00 | 0.00 |
| ATOM | 834 | CA  | TYR | 53 | 6.642 | -10.307 | -4.962 | 1.00 | 0.00 |
| ATOM | 835 | HA  | TYR | 53 | 5.637 | -10.700 | -5.115 | 1.00 | 0.00 |
| ATOM | 836 | CB  | TYR | 53 | 7.347 | -10.228 | -6.316 | 1.00 | 0.00 |
| ATOM | 837 | HB2 | TYR | 53 | 6.872 | -9.422  | -6.875 | 1.00 | 0.00 |
| ATOM | 838 | HB3 | TYR | 53 | 8.388 | -9.971  | -6.122 | 1.00 | 0.00 |
| ATOM | 839 | CG  | TYR | 53 | 7.285 | -11.507 | -7.126 | 1.00 | 0.00 |
| ATOM | 840 | CD1 | TYR | 53 | 6.046 | -12.050 | -7.497 | 1.00 | 0.00 |
| ATOM | 841 | HD1 | TYR | 53 | 5.133 | -11.539 | -7.192 | 1.00 | 0.00 |
| ATOM | 842 | CE1 | TYR | 53 | 5.970 | -13.232 | -8.248 | 1.00 | 0.00 |
| ATOM | 843 | HE1 | TYR | 53 | 5.006 | -13.642 | -8.550 | 1.00 | 0.00 |
| ATOM | 844 | CZ  | TYR | 53 | 7.160 | -13.883 | -8.623 | 1.00 | 0.00 |
| ATOM | 845 | OH  | TYR | 53 | 7.103 | -15.039 | -9.333 | 1.00 | 0.00 |
| ATOM | 846 | HH  | TYR | 53 | 6.204 | -15.319 | -9.523 | 1.00 | 0.00 |
| ATOM | 847 | CE2 | TYR | 53 | 8.412 | -13.350 | -8.255 | 1.00 | 0.00 |
| ATOM | 848 | HE2 | TYR | 53 | 9.333 | -13.856 | -8.546 | 1.00 | 0.00 |
| ATOM | 849 | CD2 | TYR | 53 | 8.469 | -12.158 | -7.507 | 1.00 | 0.00 |
| ATOM | 850 | HD2 | TYR | 53 | 9.434 | -11.739 | -7.223 | 1.00 | 0.00 |
| ATOM | 851 | C   | TYR | 53 | 7.440 | -11.187 | -4.053 | 1.00 | 0.00 |

|      |     |      |     |    |        |         |        |      |      |
|------|-----|------|-----|----|--------|---------|--------|------|------|
| ATOM | 852 | O    | TYR | 53 | 7.227  | -12.379 | -4.015 | 1.00 | 0.00 |
| ATOM | 853 | N    | GLN | 54 | 8.396  | -10.624 | -3.326 | 1.00 | 0.00 |
| ATOM | 854 | H    | GLN | 54 | 8.546  | -9.634  | -3.460 | 1.00 | 0.00 |
| ATOM | 855 | CA   | GLN | 54 | 9.250  | -11.324 | -2.408 | 1.00 | 0.00 |
| ATOM | 856 | HA   | GLN | 54 | 9.876  | -12.026 | -2.959 | 1.00 | 0.00 |
| ATOM | 857 | CB   | GLN | 54 | 10.158 | -10.354 | -1.642 | 1.00 | 0.00 |
| ATOM | 858 | HB2  | GLN | 54 | 10.715 | -10.922 | -0.897 | 1.00 | 0.00 |
| ATOM | 859 | HB3  | GLN | 54 | 10.854 | -9.904  | -2.350 | 1.00 | 0.00 |
| ATOM | 860 | CG   | GLN | 54 | 9.353  | -9.254  | -0.948 | 1.00 | 0.00 |
| ATOM | 861 | HG2  | GLN | 54 | 8.873  | -8.605  | -1.681 | 1.00 | 0.00 |
| ATOM | 862 | HG3  | GLN | 54 | 8.590  | -9.742  | -0.341 | 1.00 | 0.00 |
| ATOM | 863 | CD   | GLN | 54 | 10.220 | -8.405  | -0.044 | 1.00 | 0.00 |
| ATOM | 864 | OE1  | GLN | 54 | 11.386 | -8.136  | -0.318 | 1.00 | 0.00 |
| ATOM | 865 | NE2  | GLN | 54 | 9.635  | -7.935  | 1.035  | 1.00 | 0.00 |
| ATOM | 866 | HE21 | GLN | 54 | 10.159 | -7.361  | 1.680  | 1.00 | 0.00 |
| ATOM | 867 | HE22 | GLN | 54 | 8.664  | -8.150  | 1.214  | 1.00 | 0.00 |
| ATOM | 868 | C    | GLN | 54 | 8.400  | -12.129 | -1.437 | 1.00 | 0.00 |
| ATOM | 869 | O    | GLN | 54 | 8.847  | -13.155 | -0.940 | 1.00 | 0.00 |
| ATOM | 870 | N    | GLU | 55 | 7.165  | -11.671 | -1.202 | 1.00 | 0.00 |
| ATOM | 871 | H    | GLU | 55 | 6.894  | -10.775 | -1.582 | 1.00 | 0.00 |
| ATOM | 872 | CA   | GLU | 55 | 6.237  | -12.357 | -0.349 | 1.00 | 0.00 |
| ATOM | 873 | HA   | GLU | 55 | 6.775  | -12.873 | 0.446  | 1.00 | 0.00 |



|      |     |     |     |    |       |         |        |      |      |
|------|-----|-----|-----|----|-------|---------|--------|------|------|
| ATOM | 874 | CB  | GLU | 55 | 5.273 | -11.369 | 0.280  | 1.00 | 0.00 |
| ATOM | 875 | HB2 | GLU | 55 | 4.575 | -11.034 | -0.488 | 1.00 | 0.00 |
| ATOM | 876 | HB3 | GLU | 55 | 4.724 | -11.881 | 1.070  | 1.00 | 0.00 |
| ATOM | 877 | CG  | GLU | 55 | 6.000 | -10.167 | 0.864  | 1.00 | 0.00 |
| ATOM | 878 | HG2 | GLU | 55 | 6.931 | -10.562 | 1.269  | 1.00 | 0.00 |
| ATOM | 879 | HG3 | GLU | 55 | 6.224 | -9.418  | 0.105  | 1.00 | 0.00 |
| ATOM | 880 | CD  | GLU | 55 | 5.196 | -9.534  | 1.975  | 1.00 | 0.00 |
| ATOM | 881 | OE1 | GLU | 55 | 4.256 | -10.157 | 2.502  | 1.00 | 0.00 |
| ATOM | 882 | OE2 | GLU | 55 | 5.510 | -8.369  | 2.221  | 1.00 | 0.00 |
| ATOM | 883 | C   | GLU | 55 | 5.510 | -13.452 | -1.098 | 1.00 | 0.00 |
| ATOM | 884 | O   | GLU | 55 | 4.474 | -13.912 | -0.660 | 1.00 | 0.00 |
| ATOM | 885 | N   | ASP | 56 | 6.043 | -13.900 | -2.224 | 1.00 | 0.00 |
| ATOM | 886 | H   | ASP | 56 | 6.932 | -13.503 | -2.492 | 1.00 | 0.00 |
| ATOM | 887 | CA  | ASP | 56 | 5.456 | -14.890 | -3.079 | 1.00 | 0.00 |
| ATOM | 888 | HA  | ASP | 56 | 6.207 | -15.309 | -3.749 | 1.00 | 0.00 |
| ATOM | 889 | CB  | ASP | 56 | 4.881 | -16.022 | -2.220 | 1.00 | 0.00 |
| ATOM | 890 | HB2 | ASP | 56 | 5.571 | -16.054 | -1.377 | 1.00 | 0.00 |
| ATOM | 891 | HB3 | ASP | 56 | 3.883 | -15.767 | -1.864 | 1.00 | 0.00 |
| ATOM | 892 | CG  | ASP | 56 | 4.844 | -17.374 | -2.891 | 1.00 | 0.00 |
| ATOM | 893 | OD1 | ASP | 56 | 5.278 | -17.461 | -4.060 | 1.00 | 0.00 |
| ATOM | 894 | OD2 | ASP | 56 | 4.289 | -18.305 | -2.273 | 1.00 | 0.00 |
| ATOM | 895 | C   | ASP | 56 | 4.342 | -14.271 | -3.911 | 1.00 | 0.00 |

|      |     |      |     |    |        |         |        |      |      |
|------|-----|------|-----|----|--------|---------|--------|------|------|
| ATOM | 896 | O    | ASP | 56 | 4.116  | -13.054 | -3.938 | 1.00 | 0.00 |
| ATOM | 897 | N    | GLN | 57 | 3.578  | -15.130 | -4.597 | 1.00 | 0.00 |
| ATOM | 898 | H    | GLN | 57 | 3.808  | -16.114 | -4.589 | 1.00 | 0.00 |
| ATOM | 899 | CA   | GLN | 57 | 2.462  | -14.696 | -5.399 | 1.00 | 0.00 |
| ATOM | 900 | HA   | GLN | 57 | 2.632  | -13.681 | -5.758 | 1.00 | 0.00 |
| ATOM | 901 | CB   | GLN | 57 | 2.295  | -15.620 | -6.606 | 1.00 | 0.00 |
| ATOM | 902 | HB2  | GLN | 57 | 3.215  | -16.186 | -6.751 | 1.00 | 0.00 |
| ATOM | 903 | HB3  | GLN | 57 | 1.472  | -16.309 | -6.416 | 1.00 | 0.00 |
| ATOM | 904 | CG   | GLN | 57 | 1.996  | -14.805 | -7.863 | 1.00 | 0.00 |
| ATOM | 905 | HG2  | GLN | 57 | 2.605  | -13.901 | -7.846 | 1.00 | 0.00 |
| ATOM | 906 | HG3  | GLN | 57 | 2.227  | -15.382 | -8.759 | 1.00 | 0.00 |
| ATOM | 907 | CD   | GLN | 57 | 0.542  | -14.406 | -7.909 | 1.00 | 0.00 |
| ATOM | 908 | OE1  | GLN | 57 | -0.349 | -15.204 | -8.053 | 1.00 | 0.00 |
| ATOM | 909 | NE2  | GLN | 57 | 0.274  | -13.133 | -7.809 | 1.00 | 0.00 |
| ATOM | 910 | HE21 | GLN | 57 | -0.686 | -12.819 | -7.835 | 1.00 | 0.00 |
| ATOM | 911 | HE22 | GLN | 57 | 1.027  | -12.468 | -7.706 | 1.00 | 0.00 |
| ATOM | 912 | C    | GLN | 57 | 1.186  | -14.655 | -4.585 | 1.00 | 0.00 |
| ATOM | 913 | O    | GLN | 57 | 0.255  | -13.913 | -4.878 | 1.00 | 0.00 |
| ATOM | 914 | N    | VAL | 58 | 1.146  | -15.431 | -3.510 | 1.00 | 0.00 |
| ATOM | 915 | H    | VAL | 58 | 1.924  | -16.051 | -3.336 | 1.00 | 0.00 |
| ATOM | 916 | CA   | VAL | 58 | 0.002  | -15.498 | -2.621 | 1.00 | 0.00 |
| ATOM | 917 | HA   | VAL | 58 | -0.936 | -15.488 | -3.176 | 1.00 | 0.00 |

|      |     |      |     |    |        |         |        |      |      |
|------|-----|------|-----|----|--------|---------|--------|------|------|
| ATOM | 918 | CB   | VAL | 58 | 0.054  | -16.773 | -1.770 | 1.00 | 0.00 |
| ATOM | 919 | HB   | VAL | 58 | 0.393  | -16.519 | -0.766 | 1.00 | 0.00 |
| ATOM | 920 | CG1  | VAL | 58 | -1.335 | -17.414 | -1.693 | 1.00 | 0.00 |
| ATOM | 921 | HG11 | VAL | 58 | -1.674 | -17.669 | -2.697 | 1.00 | 0.00 |
| ATOM | 922 | HG12 | VAL | 58 | -1.285 | -18.319 | -1.086 | 1.00 | 0.00 |
| ATOM | 923 | HG13 | VAL | 58 | -2.035 | -16.712 | -1.241 | 1.00 | 0.00 |
| ATOM | 924 | CG2  | VAL | 58 | 1.061  | -17.782 | -2.332 | 1.00 | 0.00 |
| ATOM | 925 | HG21 | VAL | 58 | 2.055  | -17.336 | -2.345 | 1.00 | 0.00 |
| ATOM | 926 | HG22 | VAL | 58 | 1.072  | -18.674 | -1.705 | 1.00 | 0.00 |
| ATOM | 927 | HG23 | VAL | 58 | 0.773  | -18.057 | -3.347 | 1.00 | 0.00 |
| ATOM | 928 | C    | VAL | 58 | -0.043 | -14.238 | -1.778 | 1.00 | 0.00 |
| ATOM | 929 | O    | VAL | 58 | -0.986 | -14.063 | -1.009 | 1.00 | 0.00 |
| ATOM | 930 | N    | CYX | 59 | 0.942  | -13.352 | -1.954 | 1.00 | 0.00 |
| ATOM | 931 | H    | CYX | 59 | 1.681  | -13.574 | -2.605 | 1.00 | 0.00 |
| ATOM | 932 | CA   | CYX | 59 | 1.017  | -12.115 | -1.238 | 1.00 | 0.00 |
| ATOM | 933 | HA   | CYX | 59 | 0.187  | -12.048 | -0.535 | 1.00 | 0.00 |
| ATOM | 934 | CB   | CYX | 59 | 2.307  | -12.019 | -0.469 | 1.00 | 0.00 |
| ATOM | 935 | HB2  | CYX | 59 | 3.127  | -12.383 | -1.088 | 1.00 | 0.00 |
| ATOM | 936 | HB3  | CYX | 59 | 2.492  | -10.980 | -0.196 | 1.00 | 0.00 |
| ATOM | 937 | SG   | CYX | 59 | 2.383  | -12.993 | 1.078  | 1.00 | 0.00 |
| ATOM | 938 | C    | CYX | 59 | 0.906  | -10.965 | -2.208 | 1.00 | 0.00 |
| ATOM | 939 | O    | CYX | 59 | 0.321  | -9.928  | -1.880 | 1.00 | 0.00 |

|      |     |      |     |    |        |         |        |      |      |
|------|-----|------|-----|----|--------|---------|--------|------|------|
| ATOM | 940 | N    | VAL | 60 | 1.349  | -11.176 | -3.456 | 1.00 | 0.00 |
| ATOM | 941 | H    | VAL | 60 | 1.817  | -12.045 | -3.670 | 1.00 | 0.00 |
| ATOM | 942 | CA   | VAL | 60 | 1.247  | -10.179 | -4.497 | 1.00 | 0.00 |
| ATOM | 943 | HA   | VAL | 60 | 1.863  | -9.298  | -4.321 | 1.00 | 0.00 |
| ATOM | 944 | CB   | VAL | 60 | 1.638  | -10.786 | -5.839 | 1.00 | 0.00 |
| ATOM | 945 | HB   | VAL | 60 | 1.285  | -11.817 | -5.874 | 1.00 | 0.00 |
| ATOM | 946 | CG1  | VAL | 60 | 1.025  | -10.000 | -6.993 | 1.00 | 0.00 |
| ATOM | 947 | HG11 | VAL | 60 | 1.378  | -8.970  | -6.960 | 1.00 | 0.00 |
| ATOM | 948 | HG12 | VAL | 60 | 1.319  | -10.454 | -7.939 | 1.00 | 0.00 |
| ATOM | 949 | HG13 | VAL | 60 | -0.062 | -10.015 | -6.906 | 1.00 | 0.00 |
| ATOM | 950 | CG2  | VAL | 60 | 3.142  | -10.883 | -5.975 | 1.00 | 0.00 |
| ATOM | 951 | HG21 | VAL | 60 | 3.539  | -11.513 | -5.179 | 1.00 | 0.00 |
| ATOM | 952 | HG22 | VAL | 60 | 3.392  | -11.320 | -6.942 | 1.00 | 0.00 |
| ATOM | 953 | HG23 | VAL | 60 | 3.579  | -9.887  | -5.903 | 1.00 | 0.00 |
| ATOM | 954 | C    | VAL | 60 | -0.153 | -9.610  | -4.527 | 1.00 | 0.00 |
| ATOM | 955 | O    | VAL | 60 | -0.351 | -8.485  | -4.952 | 1.00 | 0.00 |
| ATOM | 956 | N    | CYX | 61 | -1.145 | -10.385 | -4.096 | 1.00 | 0.00 |
| ATOM | 957 | H    | CYX | 61 | -0.926 | -11.349 | -3.887 | 1.00 | 0.00 |
| ATOM | 958 | CA   | CYX | 61 | -2.492 | -9.963  | -3.985 | 1.00 | 0.00 |
| ATOM | 959 | HA   | CYX | 61 | -2.595 | -9.237  | -3.179 | 1.00 | 0.00 |
| ATOM | 960 | CB   | CYX | 61 | -2.929 | -9.309  | -5.288 | 1.00 | 0.00 |
| ATOM | 961 | HB2  | CYX | 61 | -2.164 | -9.466  | -6.048 | 1.00 | 0.00 |

|      |     |     |     |    |        |         |        |      |      |
|------|-----|-----|-----|----|--------|---------|--------|------|------|
| ATOM | 962 | HB3 | CYX | 61 | -3.867 | -9.753  | -5.621 | 1.00 | 0.00 |
| ATOM | 963 | SG  | CYX | 61 | -3.201 | -7.519  | -5.232 | 1.00 | 0.00 |
| ATOM | 964 | C   | CYX | 61 | -3.355 | -11.161 | -3.609 | 1.00 | 0.00 |
| ATOM | 965 | O   | CYX | 61 | -2.903 | -12.284 | -3.709 | 1.00 | 0.00 |
| ATOM | 966 | N   | PRO | 62 | -4.604 | -10.905 | -3.186 | 1.00 | 0.00 |
| ATOM | 967 | CD  | PRO | 62 | -5.613 | -11.858 | -2.769 | 1.00 | 0.00 |
| ATOM | 968 | HD2 | PRO | 62 | -5.259 | -12.356 | -1.866 | 1.00 | 0.00 |
| ATOM | 969 | HD3 | PRO | 62 | -5.737 | -12.594 | -3.564 | 1.00 | 0.00 |
| ATOM | 970 | CG  | PRO | 62 | -6.887 | -11.036 | -2.528 | 1.00 | 0.00 |
| ATOM | 971 | HG2 | PRO | 62 | -7.171 | -11.130 | -1.480 | 1.00 | 0.00 |
| ATOM | 972 | HG3 | PRO | 62 | -7.684 | -11.433 | -3.157 | 1.00 | 0.00 |
| ATOM | 973 | CB  | PRO | 62 | -6.574 | -9.584  | -2.894 | 1.00 | 0.00 |
| ATOM | 974 | HB2 | PRO | 62 | -6.920 | -8.874  | -2.144 | 1.00 | 0.00 |
| ATOM | 975 | HB3 | PRO | 62 | -7.010 | -9.332  | -3.861 | 1.00 | 0.00 |
| ATOM | 976 | CA  | PRO | 62 | -5.063 | -9.544  | -2.982 | 1.00 | 0.00 |
| ATOM | 977 | HA  | PRO | 62 | -4.828 | -8.971  | -3.879 | 1.00 | 0.00 |
| ATOM | 978 | C   | PRO | 62 | -4.423 | -8.900  | -1.798 | 1.00 | 0.00 |
| ATOM | 979 | O   | PRO | 62 | -4.710 | -7.781  | -1.504 | 1.00 | 0.00 |
| ATOM | 980 | N   | THR | 63 | -3.591 | -9.612  | -1.083 | 1.00 | 0.00 |
| ATOM | 981 | H   | THR | 63 | -3.498 | -10.580 | -1.357 | 1.00 | 0.00 |
| ATOM | 982 | CA  | THR | 63 | -2.856 | -9.155  | 0.070  | 1.00 | 0.00 |
| ATOM | 983 | HA  | THR | 63 | -3.559 | -9.248  | 0.898  | 1.00 | 0.00 |

|      |      |      |     |    |        |         |        |      |      |
|------|------|------|-----|----|--------|---------|--------|------|------|
| ATOM | 984  | CB   | THR | 63 | -1.676 | -10.087 | 0.326  | 1.00 | 0.00 |
| ATOM | 985  | HB   | THR | 63 | -0.767 | -9.579  | 0.004  | 1.00 | 0.00 |
| ATOM | 986  | CG2  | THR | 63 | -1.552 | -10.465 | 1.778  | 1.00 | 0.00 |
| ATOM | 987  | HG21 | THR | 63 | -2.460 | -10.974 | 2.100  | 1.00 | 0.00 |
| ATOM | 988  | HG22 | THR | 63 | -0.698 | -11.129 | 1.909  | 1.00 | 0.00 |
| ATOM | 989  | HG23 | THR | 63 | -1.408 | -9.566  | 2.377  | 1.00 | 0.00 |
| ATOM | 990  | OG1  | THR | 63 | -1.991 | -11.310 | -0.327 | 1.00 | 0.00 |
| ATOM | 991  | HG1  | THR | 63 | -1.275 | -11.937 | -0.196 | 1.00 | 0.00 |
| ATOM | 992  | C    | THR | 63 | -2.386 | -7.747  | -0.103 | 1.00 | 0.00 |
| ATOM | 993  | O    | THR | 63 | -2.701 | -6.970  | 0.774  | 1.00 | 0.00 |
| ATOM | 994  | N    | LEU | 64 | -1.785 | -7.398  | -1.240 | 1.00 | 0.00 |
| ATOM | 995  | H    | LEU | 64 | -1.599 | -8.123  | -1.919 | 1.00 | 0.00 |
| ATOM | 996  | CA   | LEU | 64 | -1.345 | -6.049  | -1.536 | 1.00 | 0.00 |
| ATOM | 997  | HA   | LEU | 64 | -0.477 | -5.795  | -0.928 | 1.00 | 0.00 |
| ATOM | 998  | CB   | LEU | 64 | -0.956 | -5.944  | -3.009 | 1.00 | 0.00 |
| ATOM | 999  | HB2  | LEU | 64 | -0.775 | -6.973  | -3.319 | 1.00 | 0.00 |
| ATOM | 1000 | HB3  | LEU | 64 | -1.791 | -5.536  | -3.578 | 1.00 | 0.00 |
| ATOM | 1001 | CG   | LEU | 64 | 0.300  | -5.103  | -3.270 | 1.00 | 0.00 |
| ATOM | 1002 | HG   | LEU | 64 | 0.942  | -5.143  | -2.390 | 1.00 | 0.00 |
| ATOM | 1003 | CD1  | LEU | 64 | 1.054  | -5.633  | -4.468 | 1.00 | 0.00 |
| ATOM | 1004 | HD11 | LEU | 64 | 0.413  | -5.593  | -5.349 | 1.00 | 0.00 |
| ATOM | 1005 | HD12 | LEU | 64 | 1.942  | -5.024  | -4.638 | 1.00 | 0.00 |

|      |      |      |     |    |        |        |        |      |      |
|------|------|------|-----|----|--------|--------|--------|------|------|
| ATOM | 1006 | HD13 | LEU | 64 | 1.352  | -6.665 | -4.283 | 1.00 | 0.00 |
| ATOM | 1007 | CD2  | LEU | 64 | -0.054 | -3.632 | -3.468 | 1.00 | 0.00 |
| ATOM | 1008 | HD21 | LEU | 64 | -0.547 | -3.253 | -2.573 | 1.00 | 0.00 |
| ATOM | 1009 | HD22 | LEU | 64 | 0.856  | -3.061 | -3.651 | 1.00 | 0.00 |
| ATOM | 1010 | HD23 | LEU | 64 | -0.724 | -3.531 | -4.322 | 1.00 | 0.00 |
| ATOM | 1011 | C    | LEU | 64 | -2.420 | -5.040 | -1.208 | 1.00 | 0.00 |
| ATOM | 1012 | O    | LEU | 64 | -2.106 | -4.022 | -0.603 | 1.00 | 0.00 |
| ATOM | 1013 | N    | LYS | 65 | -3.691 | -5.370 | -1.498 | 1.00 | 0.00 |
| ATOM | 1014 | H    | LYS | 65 | -3.834 | -6.191 | -2.070 | 1.00 | 0.00 |
| ATOM | 1015 | CA   | LYS | 65 | -4.841 | -4.577 | -1.142 | 1.00 | 0.00 |
| ATOM | 1016 | HA   | LYS | 65 | -4.897 | -3.708 | -1.798 | 1.00 | 0.00 |
| ATOM | 1017 | CB   | LYS | 65 | -6.142 | -5.380 | -1.281 | 1.00 | 0.00 |
| ATOM | 1018 | HB2  | LYS | 65 | -6.256 | -5.686 | -2.321 | 1.00 | 0.00 |
| ATOM | 1019 | HB3  | LYS | 65 | -6.077 | -6.265 | -0.648 | 1.00 | 0.00 |
| ATOM | 1020 | CG   | LYS | 65 | -7.345 | -4.544 | -0.863 | 1.00 | 0.00 |
| ATOM | 1021 | HG2  | LYS | 65 | -7.082 | -3.490 | -0.950 | 1.00 | 0.00 |
| ATOM | 1022 | HG3  | LYS | 65 | -8.174 | -4.768 | -1.535 | 1.00 | 0.00 |
| ATOM | 1023 | CD   | LYS | 65 | -7.762 | -4.849 | 0.582  | 1.00 | 0.00 |
| ATOM | 1024 | HD2  | LYS | 65 | -6.947 | -5.369 | 1.085  | 1.00 | 0.00 |
| ATOM | 1025 | HD3  | LYS | 65 | -7.968 | -3.912 | 1.098  | 1.00 | 0.00 |
| ATOM | 1026 | CE   | LYS | 65 | -9.014 | -5.727 | 0.601  | 1.00 | 0.00 |
| ATOM | 1027 | HE2  | LYS | 65 | -9.576 | -5.566 | -0.319 | 1.00 | 0.00 |

|      |      |          |    |         |        |       |      |      |
|------|------|----------|----|---------|--------|-------|------|------|
| ATOM | 1028 | HE3 LYS  | 65 | -8.715  | -6.773 | 0.664 | 1.00 | 0.00 |
| ATOM | 1029 | NZ LYS   | 65 | -9.861  | -5.387 | 1.761 | 1.00 | 0.00 |
| ATOM | 1030 | HZ1 LYS  | 65 | -10.139 | -4.418 | 1.702 | 1.00 | 0.00 |
| ATOM | 1031 | HZ2 LYS  | 65 | -10.683 | -5.974 | 1.761 | 1.00 | 0.00 |
| ATOM | 1032 | HZ3 LYS  | 65 | -9.340  | -5.537 | 2.613 | 1.00 | 0.00 |
| ATOM | 1033 | C LYS    | 65 | -4.660  | -4.006 | 0.246 | 1.00 | 0.00 |
| ATOM | 1034 | O LYS    | 65 | -5.108  | -2.928 | 0.485 | 1.00 | 0.00 |
| ATOM | 1035 | N GLN    | 66 | -4.028  | -4.702 | 1.170 | 1.00 | 0.00 |
| ATOM | 1036 | H GLN    | 66 | -3.840  | -5.664 | 0.926 | 1.00 | 0.00 |
| ATOM | 1037 | CA GLN   | 66 | -3.674  | -4.257 | 2.467 | 1.00 | 0.00 |
| ATOM | 1038 | HA GLN   | 66 | -4.561  | -3.881 | 2.977 | 1.00 | 0.00 |
| ATOM | 1039 | CB GLN   | 66 | -3.078  | -5.397 | 3.299 | 1.00 | 0.00 |
| ATOM | 1040 | HB2 GLN  | 66 | -3.785  | -6.226 | 3.331 | 1.00 | 0.00 |
| ATOM | 1041 | HB3 GLN  | 66 | -2.148  | -5.731 | 2.838 | 1.00 | 0.00 |
| ATOM | 1042 | CG GLN   | 66 | -2.794  | -4.909 | 4.732 | 1.00 | 0.00 |
| ATOM | 1043 | HG2 GLN  | 66 | -2.516  | -5.718 | 5.408 | 1.00 | 0.00 |
| ATOM | 1044 | HG3 GLN  | 66 | -1.966  | -4.205 | 4.649 | 1.00 | 0.00 |
| ATOM | 1045 | CD GLN   | 66 | -3.999  | -4.178 | 5.316 | 1.00 | 0.00 |
| ATOM | 1046 | OE1 GLN  | 66 | -3.886  | -3.145 | 5.952 | 1.00 | 0.00 |
| ATOM | 1047 | NE2 GLN  | 66 | -5.187  | -4.692 | 5.010 | 1.00 | 0.00 |
| ATOM | 1048 | HE21 GLN | 66 | -6.028  | -4.258 | 5.363 | 1.00 | 0.00 |
| ATOM | 1049 | HE22 GLN | 66 | -5.243  | -5.514 | 4.426 | 1.00 | 0.00 |



|      |      |     |     |    |        |        |        |      |      |
|------|------|-----|-----|----|--------|--------|--------|------|------|
| ATOM | 1050 | C   | GLN | 66 | -2.728 | -3.083 | 2.449  | 1.00 | 0.00 |
| ATOM | 1051 | O   | GLN | 66 | -3.119 | -1.980 | 2.810  | 1.00 | 0.00 |
| ATOM | 1052 | N   | ALA | 67 | -1.473 | -3.306 | 2.065  | 1.00 | 0.00 |
| ATOM | 1053 | H   | ALA | 67 | -1.174 | -4.253 | 1.878  | 1.00 | 0.00 |
| ATOM | 1054 | CA  | ALA | 67 | -0.497 | -2.247 | 1.963  | 1.00 | 0.00 |
| ATOM | 1055 | HA  | ALA | 67 | -0.278 | -1.836 | 2.948  | 1.00 | 0.00 |
| ATOM | 1056 | CB  | ALA | 67 | 0.791  | -2.807 | 1.372  | 1.00 | 0.00 |
| ATOM | 1057 | HB1 | ALA | 67 | 0.590  | -3.214 | 0.381  | 1.00 | 0.00 |
| ATOM | 1058 | HB2 | ALA | 67 | 1.532  | -2.011 | 1.294  | 1.00 | 0.00 |
| ATOM | 1059 | HB3 | ALA | 67 | 1.174  | -3.597 | 2.018  | 1.00 | 0.00 |
| ATOM | 1060 | C   | ALA | 67 | -1.050 | -1.103 | 1.120  | 1.00 | 0.00 |
| ATOM | 1061 | O   | ALA | 67 | -0.672 | 0.039  | 1.316  | 1.00 | 0.00 |
| ATOM | 1062 | N   | ALA | 68 | -2.027 | -1.378 | 0.263  | 1.00 | 0.00 |
| ATOM | 1063 | H   | ALA | 68 | -2.302 | -2.343 | 0.148  | 1.00 | 0.00 |
| ATOM | 1064 | CA  | ALA | 68 | -2.671 | -0.387 | -0.546 | 1.00 | 0.00 |
| ATOM | 1065 | HA  | ALA | 68 | -1.981 | 0.425  | -0.777 | 1.00 | 0.00 |
| ATOM | 1066 | CB  | ALA | 68 | -3.109 | -1.040 | -1.851 | 1.00 | 0.00 |
| ATOM | 1067 | HB1 | ALA | 68 | -3.807 | -1.849 | -1.637 | 1.00 | 0.00 |
| ATOM | 1068 | HB2 | ALA | 68 | -3.597 | -0.298 | -2.484 | 1.00 | 0.00 |
| ATOM | 1069 | HB3 | ALA | 68 | -2.237 | -1.441 | -2.368 | 1.00 | 0.00 |
| ATOM | 1070 | C   | ALA | 68 | -3.850 | 0.231  | 0.192  | 1.00 | 0.00 |
| ATOM | 1071 | O   | ALA | 68 | -4.222 | 1.382  | -0.009 | 1.00 | 0.00 |

|      |      |     |     |    |         |        |       |      |      |
|------|------|-----|-----|----|---------|--------|-------|------|------|
| ATOM | 1072 | N   | LYS | 69 | -4.462  | -0.510 | 1.104 | 1.00 | 0.00 |
| ATOM | 1073 | H   | LYS | 69 | -4.163  | -1.471 | 1.187 | 1.00 | 0.00 |
| ATOM | 1074 | CA  | LYS | 69 | -5.566  | -0.069 | 1.907 | 1.00 | 0.00 |
| ATOM | 1075 | HA  | LYS | 69 | -6.268  | 0.489  | 1.287 | 1.00 | 0.00 |
| ATOM | 1076 | CB  | LYS | 69 | -6.304  | -1.262 | 2.531 | 1.00 | 0.00 |
| ATOM | 1077 | HB2 | LYS | 69 | -6.662  | -1.911 | 1.732 | 1.00 | 0.00 |
| ATOM | 1078 | HB3 | LYS | 69 | -5.608  | -1.815 | 3.163 | 1.00 | 0.00 |
| ATOM | 1079 | CG  | LYS | 69 | -7.491  | -0.788 | 3.373 | 1.00 | 0.00 |
| ATOM | 1080 | HG2 | LYS | 69 | -8.118  | -1.649 | 3.607 | 1.00 | 0.00 |
| ATOM | 1081 | HG3 | LYS | 69 | -7.111  | -0.354 | 4.298 | 1.00 | 0.00 |
| ATOM | 1082 | CD  | LYS | 69 | -8.322  | 0.261  | 2.618 | 1.00 | 0.00 |
| ATOM | 1083 | HD2 | LYS | 69 | -7.779  | 1.206  | 2.624 | 1.00 | 0.00 |
| ATOM | 1084 | HD3 | LYS | 69 | -8.454  | -0.075 | 1.589 | 1.00 | 0.00 |
| ATOM | 1085 | CE  | LYS | 69 | -9.684  | 0.455  | 3.267 | 1.00 | 0.00 |
| ATOM | 1086 | HE2 | LYS | 69 | -10.412 | -0.173 | 2.753 | 1.00 | 0.00 |
| ATOM | 1087 | HE3 | LYS | 69 | -9.622  | 0.156  | 4.313 | 1.00 | 0.00 |
| ATOM | 1088 | NZ  | LYS | 69 | -10.106 | 1.866  | 3.183 | 1.00 | 0.00 |
| ATOM | 1089 | HZ1 | LYS | 69 | -10.164 | 2.142  | 2.213 | 1.00 | 0.00 |
| ATOM | 1090 | HZ2 | LYS | 69 | -11.011 | 1.973  | 3.619 | 1.00 | 0.00 |
| ATOM | 1091 | HZ3 | LYS | 69 | -9.432  | 2.448  | 3.659 | 1.00 | 0.00 |
| ATOM | 1092 | C   | LYS | 69 | -5.055  | 0.902  | 2.942 | 1.00 | 0.00 |
| ATOM | 1093 | O   | LYS | 69 | -5.741  | 1.852  | 3.260 | 1.00 | 0.00 |

|      |      |      |     |    |        |        |        |      |      |
|------|------|------|-----|----|--------|--------|--------|------|------|
| ATOM | 1094 | N    | SER | 70 | -3.834 | 0.716  | 3.427  | 1.00 | 0.00 |
| ATOM | 1095 | H    | SER | 70 | -3.315 | -0.099 | 3.133  | 1.00 | 0.00 |
| ATOM | 1096 | CA   | SER | 70 | -3.228 | 1.602  | 4.397  | 1.00 | 0.00 |
| ATOM | 1097 | HA   | SER | 70 | -3.996 | 2.218  | 4.865  | 1.00 | 0.00 |
| ATOM | 1098 | CB   | SER | 70 | -2.519 | 0.801  | 5.481  | 1.00 | 0.00 |
| ATOM | 1099 | HB2  | SER | 70 | -3.235 | 0.109  | 5.925  | 1.00 | 0.00 |
| ATOM | 1100 | HB3  | SER | 70 | -1.707 | 0.237  | 5.021  | 1.00 | 0.00 |
| ATOM | 1101 | OG   | SER | 70 | -1.993 | 1.650  | 6.490  | 1.00 | 0.00 |
| ATOM | 1102 | HG   | SER | 70 | -1.553 | 1.119  | 7.158  | 1.00 | 0.00 |
| ATOM | 1103 | C    | SER | 70 | -2.257 | 2.539  | 3.705  | 1.00 | 0.00 |
| ATOM | 1104 | O    | SER | 70 | -1.453 | 3.227  | 4.336  | 1.00 | 0.00 |
| ATOM | 1105 | N    | VAL | 71 | -2.317 | 2.592  | 2.369  | 1.00 | 0.00 |
| ATOM | 1106 | H    | VAL | 71 | -2.933 | 1.962  | 1.875  | 1.00 | 0.00 |
| ATOM | 1107 | CA   | VAL | 71 | -1.461 | 3.464  | 1.593  | 1.00 | 0.00 |
| ATOM | 1108 | HA   | VAL | 71 | -0.404 | 3.366  | 1.840  | 1.00 | 0.00 |
| ATOM | 1109 | CB   | VAL | 71 | -1.642 | 3.180  | 0.102  | 1.00 | 0.00 |
| ATOM | 1110 | HB   | VAL | 71 | -2.110 | 2.201  | -0.011 | 1.00 | 0.00 |
| ATOM | 1111 | CG1  | VAL | 71 | -2.505 | 4.228  | -0.555 | 1.00 | 0.00 |
| ATOM | 1112 | HG11 | VAL | 71 | -2.038 | 5.206  | -0.443 | 1.00 | 0.00 |
| ATOM | 1113 | HG12 | VAL | 71 | -2.614 | 3.997  | -1.615 | 1.00 | 0.00 |
| ATOM | 1114 | HG13 | VAL | 71 | -3.487 | 4.238  | -0.083 | 1.00 | 0.00 |
| ATOM | 1115 | CG2  | VAL | 71 | -0.311 | 3.062  | -0.612 | 1.00 | 0.00 |

|      |      |      |     |    |        |        |        |      |      |
|------|------|------|-----|----|--------|--------|--------|------|------|
| ATOM | 1116 | HG21 | VAL | 71 | 0.265  | 2.246  | -0.175 | 1.00 | 0.00 |
| ATOM | 1117 | HG22 | VAL | 71 | -0.482 | 2.860  | -1.670 | 1.00 | 0.00 |
| ATOM | 1118 | HG23 | VAL | 71 | 0.243  | 3.994  | -0.506 | 1.00 | 0.00 |
| ATOM | 1119 | C    | VAL | 71 | -1.770 | 4.907  | 1.965  | 1.00 | 0.00 |
| ATOM | 1120 | O    | VAL | 71 | -1.060 | 5.831  | 1.627  | 1.00 | 0.00 |
| ATOM | 1121 | N    | ARG | 72 | -2.896 | 5.161  | 2.625  | 1.00 | 0.00 |
| ATOM | 1122 | H    | ARG | 72 | -3.529 | 4.396  | 2.812  | 1.00 | 0.00 |
| ATOM | 1123 | CA   | ARG | 72 | -3.275 | 6.479  | 3.055  | 1.00 | 0.00 |
| ATOM | 1124 | HA   | ARG | 72 | -2.397 | 7.048  | 3.360  | 1.00 | 0.00 |
| ATOM | 1125 | CB   | ARG | 72 | -3.951 | 7.208  | 1.891  | 1.00 | 0.00 |
| ATOM | 1126 | HB2  | ARG | 72 | -3.932 | 6.565  | 1.010  | 1.00 | 0.00 |
| ATOM | 1127 | HB3  | ARG | 72 | -4.985 | 7.424  | 2.160  | 1.00 | 0.00 |
| ATOM | 1128 | CG   | ARG | 72 | -3.221 | 8.514  | 1.584  | 1.00 | 0.00 |
| ATOM | 1129 | HG2  | ARG | 72 | -2.289 | 8.528  | 2.148  | 1.00 | 0.00 |
| ATOM | 1130 | HG3  | ARG | 72 | -3.000 | 8.542  | 0.517  | 1.00 | 0.00 |
| ATOM | 1131 | CD   | ARG | 72 | -4.060 | 9.728  | 1.960  | 1.00 | 0.00 |
| ATOM | 1132 | HD2  | ARG | 72 | -4.793 | 9.908  | 1.173  | 1.00 | 0.00 |
| ATOM | 1133 | HD3  | ARG | 72 | -4.577 | 9.522  | 2.897  | 1.00 | 0.00 |
| ATOM | 1134 | NE   | ARG | 72 | -3.245 | 10.935 | 2.128  | 1.00 | 0.00 |
| ATOM | 1135 | HE   | ARG | 72 | -3.292 | 11.622 | 1.390  | 1.00 | 0.00 |
| ATOM | 1136 | CZ   | ARG | 72 | -2.452 | 11.172 | 3.165  | 1.00 | 0.00 |
| ATOM | 1137 | NH1  | ARG | 72 | -2.393 | 10.315 | 4.160  | 1.00 | 0.00 |

|      |      |      |     |    |        |        |       |      |      |
|------|------|------|-----|----|--------|--------|-------|------|------|
| ATOM | 1138 | HH11 | ARG | 72 | -2.953 | 9.475  | 4.133 | 1.00 | 0.00 |
| ATOM | 1139 | HH12 | ARG | 72 | -1.788 | 10.500 | 4.947 | 1.00 | 0.00 |
| ATOM | 1140 | NH2  | ARG | 72 | -1.737 | 12.267 | 3.206 | 1.00 | 0.00 |
| ATOM | 1141 | HH21 | ARG | 72 | -1.791 | 12.930 | 2.446 | 1.00 | 0.00 |
| ATOM | 1142 | HH22 | ARG | 72 | -1.135 | 12.443 | 3.997 | 1.00 | 0.00 |
| ATOM | 1143 | C    | ARG | 72 | -4.200 | 6.386  | 4.240 | 1.00 | 0.00 |
| ATOM | 1144 | O    | ARG | 72 | -3.795 | 6.728  | 5.343 | 1.00 | 0.00 |
| ATOM | 1145 | N    | VAL | 73 | -5.465 | 6.019  | 3.974 | 1.00 | 0.00 |
| ATOM | 1146 | H    | VAL | 73 | -5.739 | 5.865  | 3.014 | 1.00 | 0.00 |
| ATOM | 1147 | CA   | VAL | 73 | -6.477 | 5.918  | 4.999 | 1.00 | 0.00 |
| ATOM | 1148 | HA   | VAL | 73 | -6.761 | 6.887  | 5.409 | 1.00 | 0.00 |
| ATOM | 1149 | CB   | VAL | 73 | -7.725 | 5.246  | 4.426 | 1.00 | 0.00 |
| ATOM | 1150 | HB   | VAL | 73 | -7.895 | 5.641  | 3.425 | 1.00 | 0.00 |
| ATOM | 1151 | CG1  | VAL | 73 | -7.577 | 3.733  | 4.355 | 1.00 | 0.00 |
| ATOM | 1152 | HG11 | VAL | 73 | -7.407 | 3.336  | 5.356 | 1.00 | 0.00 |
| ATOM | 1153 | HG12 | VAL | 73 | -8.487 | 3.297  | 3.942 | 1.00 | 0.00 |
| ATOM | 1154 | HG13 | VAL | 73 | -6.731 | 3.479  | 3.716 | 1.00 | 0.00 |
| ATOM | 1155 | CG2  | VAL | 73 | -8.964 | 5.611  | 5.247 | 1.00 | 0.00 |
| ATOM | 1156 | HG21 | VAL | 73 | -9.107 | 6.691  | 5.229 | 1.00 | 0.00 |
| ATOM | 1157 | HG22 | VAL | 73 | -9.840 | 5.121  | 4.821 | 1.00 | 0.00 |
| ATOM | 1158 | HG23 | VAL | 73 | -8.829 | 5.280  | 6.277 | 1.00 | 0.00 |
| ATOM | 1159 | C    | VAL | 73 | -5.896 | 5.171  | 6.198 | 1.00 | 0.00 |

|      |      |      |     |    |        |       |        |      |      |
|------|------|------|-----|----|--------|-------|--------|------|------|
| ATOM | 1160 | O    | VAL | 73 | -4.930 | 4.408 | 6.075  | 1.00 | 0.00 |
| ATOM | 1161 | N    | GLN | 74 | -6.524 | 5.360 | 7.344  | 1.00 | 0.00 |
| ATOM | 1162 | H    | GLN | 74 | -7.299 | 6.005 | 7.399  | 1.00 | 0.00 |
| ATOM | 1163 | CA   | GLN | 74 | -6.080 | 4.715 | 8.562  | 1.00 | 0.00 |
| ATOM | 1164 | HA   | GLN | 74 | -6.096 | 3.632 | 8.433  | 1.00 | 0.00 |
| ATOM | 1165 | CB   | GLN | 74 | -4.650 | 5.146 | 8.908  | 1.00 | 0.00 |
| ATOM | 1166 | HB2  | GLN | 74 | -4.166 | 5.530 | 8.010  | 1.00 | 0.00 |
| ATOM | 1167 | HB3  | GLN | 74 | -4.687 | 5.930 | 9.664  | 1.00 | 0.00 |
| ATOM | 1168 | CG   | GLN | 74 | -3.853 | 3.953 | 9.447  | 1.00 | 0.00 |
| ATOM | 1169 | HG2  | GLN | 74 | -4.547 | 3.266 | 9.932  | 1.00 | 0.00 |
| ATOM | 1170 | HG3  | GLN | 74 | -3.346 | 3.439 | 8.630  | 1.00 | 0.00 |
| ATOM | 1171 | CD   | GLN | 74 | -2.811 | 4.392 | 10.466 | 1.00 | 0.00 |
| ATOM | 1172 | OE1  | GLN | 74 | -2.468 | 5.559 | 10.595 | 1.00 | 0.00 |
| ATOM | 1173 | NE2  | GLN | 74 | -2.280 | 3.425 | 11.192 | 1.00 | 0.00 |
| ATOM | 1174 | HE21 | GLN | 74 | -1.582 | 3.645 | 11.888 | 1.00 | 0.00 |
| ATOM | 1175 | HE22 | GLN | 74 | -2.575 | 2.469 | 11.048 | 1.00 | 0.00 |
| ATOM | 1176 | C    | GLN | 74 | -7.038 | 5.017 | 9.710  | 1.00 | 0.00 |
| ATOM | 1177 | O    | GLN | 74 | -6.642 | 5.193 | 10.856 | 1.00 | 0.00 |
| ATOM | 1178 | N    | GLY | 75 | -8.326 | 5.145 | 9.378  | 1.00 | 0.00 |
| ATOM | 1179 | H    | GLY | 75 | -8.607 | 5.040 | 8.413  | 1.00 | 0.00 |
| ATOM | 1180 | CA   | GLY | 75 | -9.347 | 5.432 | 10.363 | 1.00 | 0.00 |
| ATOM | 1181 | HA2  | GLY | 75 | -9.462 | 4.572 | 11.023 | 1.00 | 0.00 |

|      |      |      |     |    |         |       |        |      |      |
|------|------|------|-----|----|---------|-------|--------|------|------|
| ATOM | 1182 | HA3  | GLY | 75 | -9.048  | 6.301 | 10.948 | 1.00 | 0.00 |
| ATOM | 1183 | C    | GLY | 75 | -10.670 | 5.720 | 9.697  | 1.00 | 0.00 |
| ATOM | 1184 | O    | GLY | 75 | -11.658 | 5.044 | 9.967  | 1.00 | 0.00 |
| ATOM | 1185 | N    | GLN | 76 | -10.670 | 6.680 | 8.759  | 1.00 | 0.00 |
| ATOM | 1186 | H    | GLN | 76 | -9.818  | 7.186 | 8.566  | 1.00 | 0.00 |
| ATOM | 1187 | CA   | GLN | 76 | -11.872 | 7.063 | 8.048  | 1.00 | 0.00 |
| ATOM | 1188 | HA   | GLN | 76 | -12.184 | 6.244 | 7.400  | 1.00 | 0.00 |
| ATOM | 1189 | CB   | GLN | 76 | -13.017 | 7.386 | 9.016  | 1.00 | 0.00 |
| ATOM | 1190 | HB2  | GLN | 76 | -12.756 | 7.021 | 10.009 | 1.00 | 0.00 |
| ATOM | 1191 | HB3  | GLN | 76 | -13.159 | 8.466 | 9.051  | 1.00 | 0.00 |
| ATOM | 1192 | CG   | GLN | 76 | -14.313 | 6.717 | 8.551  | 1.00 | 0.00 |
| ATOM | 1193 | HG2  | GLN | 76 | -14.367 | 6.744 | 7.463  | 1.00 | 0.00 |
| ATOM | 1194 | HG3  | GLN | 76 | -14.340 | 5.681 | 8.889  | 1.00 | 0.00 |
| ATOM | 1195 | CD   | GLN | 76 | -15.521 | 7.443 | 9.115  | 1.00 | 0.00 |
| ATOM | 1196 | OE1  | GLN | 76 | -16.096 | 8.310 | 8.478  | 1.00 | 0.00 |
| ATOM | 1197 | NE2  | GLN | 76 | -15.893 | 7.078 | 10.325 | 1.00 | 0.00 |
| ATOM | 1198 | HE21 | GLN | 76 | -16.690 | 7.521 | 10.760 | 1.00 | 0.00 |
| ATOM | 1199 | HE22 | GLN | 76 | -15.380 | 6.357 | 10.812 | 1.00 | 0.00 |
| ATOM | 1200 | C    | GLN | 76 | -11.597 | 8.251 | 7.146  | 1.00 | 0.00 |
| ATOM | 1201 | O    | GLN | 76 | -11.418 | 9.378 | 7.595  | 1.00 | 0.00 |
| ATOM | 1202 | N    | HID | 77 | -11.480 | 7.983 | 5.847  | 1.00 | 0.00 |
| ATOM | 1203 | H    | HID | 77 | -11.464 | 7.020 | 5.543  | 1.00 | 0.00 |

|      |      |     |     |    |         |        |       |      |      |
|------|------|-----|-----|----|---------|--------|-------|------|------|
| ATOM | 1204 | CA  | HID | 77 | -11.246 | 9.022  | 4.857 | 1.00 | 0.00 |
| ATOM | 1205 | HA  | HID | 77 | -11.415 | 10.006 | 5.294 | 1.00 | 0.00 |
| ATOM | 1206 | CB  | HID | 77 | -9.797  | 8.945  | 4.371 | 1.00 | 0.00 |
| ATOM | 1207 | HB2 | HID | 77 | -9.112  | 9.110  | 5.202 | 1.00 | 0.00 |
| ATOM | 1208 | HB3 | HID | 77 | -9.594  | 7.972  | 3.922 | 1.00 | 0.00 |
| ATOM | 1209 | CG  | HID | 77 | -9.466  | 9.978  | 3.328 | 1.00 | 0.00 |
| ATOM | 1210 | ND1 | HID | 77 | -8.846  | 11.180 | 3.593 | 1.00 | 0.00 |
| ATOM | 1211 | HD1 | HID | 77 | -8.552  | 11.502 | 4.504 | 1.00 | 0.00 |
| ATOM | 1212 | CE1 | HID | 77 | -8.701  | 11.848 | 2.432 | 1.00 | 0.00 |
| ATOM | 1213 | HE1 | HID | 77 | -8.220  | 12.826 | 2.417 | 1.00 | 0.00 |
| ATOM | 1214 | NE2 | HID | 77 | -9.225  | 11.108 | 1.440 | 1.00 | 0.00 |
| ATOM | 1215 | CD2 | HID | 77 | -9.701  | 9.925  | 1.976 | 1.00 | 0.00 |
| ATOM | 1216 | HD2 | HID | 77 | -10.156 | 9.176  | 1.327 | 1.00 | 0.00 |
| ATOM | 1217 | C   | HID | 77 | -12.278 | 8.924  | 3.740 | 1.00 | 0.00 |
| ATOM | 1218 | O   | HID | 77 | -12.167 | 9.592  | 2.723 | 1.00 | 0.00 |
| ATOM | 1219 | N   | GLY | 78 | -13.287 | 8.072  | 3.925 | 1.00 | 0.00 |
| ATOM | 1220 | H   | GLY | 78 | -13.343 | 7.549  | 4.787 | 1.00 | 0.00 |
| ATOM | 1221 | CA  | GLY | 78 | -14.311 | 7.866  | 2.933 | 1.00 | 0.00 |
| ATOM | 1222 | HA2 | GLY | 78 | -14.976 | 7.069  | 3.268 | 1.00 | 0.00 |
| ATOM | 1223 | HA3 | GLY | 78 | -14.881 | 8.787  | 2.814 | 1.00 | 0.00 |
| ATOM | 1224 | C   | GLY | 78 | -13.708 | 7.475  | 1.582 | 1.00 | 0.00 |
| ATOM | 1225 | O   | GLY | 78 | -12.485 | 7.299  | 1.427 | 1.00 | 0.00 |



|      |      |     |     |    |         |        |        |      |      |
|------|------|-----|-----|----|---------|--------|--------|------|------|
| ATOM | 1226 | N   | PRO | 79 | -14.585 | 7.273  | 0.598  | 1.00 | 0.00 |
| ATOM | 1227 | CD  | PRO | 79 | -16.032 | 7.401  | 0.699  | 1.00 | 0.00 |
| ATOM | 1228 | HD2 | PRO | 79 | -16.268 | 8.452  | 0.861  | 1.00 | 0.00 |
| ATOM | 1229 | HD3 | PRO | 79 | -16.364 | 6.818  | 1.558  | 1.00 | 0.00 |
| ATOM | 1230 | CG  | PRO | 79 | -16.596 | 6.868  | -0.622 | 1.00 | 0.00 |
| ATOM | 1231 | HG2 | PRO | 79 | -17.110 | 7.677  | -1.140 | 1.00 | 0.00 |
| ATOM | 1232 | HG3 | PRO | 79 | -17.304 | 6.067  | -0.408 | 1.00 | 0.00 |
| ATOM | 1233 | CB  | PRO | 79 | -15.409 | 6.345  | -1.440 | 1.00 | 0.00 |
| ATOM | 1234 | HB2 | PRO | 79 | -15.442 | 6.687  | -2.475 | 1.00 | 0.00 |
| ATOM | 1235 | HB3 | PRO | 79 | -15.377 | 5.255  | -1.419 | 1.00 | 0.00 |
| ATOM | 1236 | CA  | PRO | 79 | -14.176 | 6.916  | -0.743 | 1.00 | 0.00 |
| ATOM | 1237 | HA  | PRO | 79 | -13.452 | 6.104  | -0.672 | 1.00 | 0.00 |
| ATOM | 1238 | C   | PRO | 79 | -13.553 | 8.084  | -1.483 | 1.00 | 0.00 |
| ATOM | 1239 | O   | PRO | 79 | -14.255 | 8.934  | -2.010 | 1.00 | 0.00 |
| ATOM | 1240 | N   | PHE | 80 | -12.215 | 8.123  | -1.508 | 1.00 | 0.00 |
| ATOM | 1241 | H   | PHE | 80 | -11.677 | 7.388  | -1.070 | 1.00 | 0.00 |
| ATOM | 1242 | CA  | PHE | 80 | -11.502 | 9.201  | -2.157 | 1.00 | 0.00 |
| ATOM | 1243 | HA  | PHE | 80 | -12.061 | 9.590  | -3.008 | 1.00 | 0.00 |
| ATOM | 1244 | CB  | PHE | 80 | -11.334 | 10.321 | -1.130 | 1.00 | 0.00 |
| ATOM | 1245 | HB2 | PHE | 80 | -12.178 | 10.328 | -0.440 | 1.00 | 0.00 |
| ATOM | 1246 | HB3 | PHE | 80 | -10.410 | 10.172 | -0.572 | 1.00 | 0.00 |
| ATOM | 1247 | CG  | PHE | 80 | -11.257 | 11.698 | -1.731 | 1.00 | 0.00 |

|      |      |         |    |         |        |        |      |      |
|------|------|---------|----|---------|--------|--------|------|------|
| ATOM | 1248 | CD1 PHE | 80 | -12.427 | 12.339 | -2.160 | 1.00 | 0.00 |
| ATOM | 1249 | HD1 PHE | 80 | -13.388 | 11.835 | -2.059 | 1.00 | 0.00 |
| ATOM | 1250 | CE1 PHE | 80 | -12.364 | 13.626 | -2.719 | 1.00 | 0.00 |
| ATOM | 1251 | HE1 PHE | 80 | -13.280 | 14.116 | -3.050 | 1.00 | 0.00 |
| ATOM | 1252 | CZ PHE  | 80 | -11.131 | 14.280 | -2.853 | 1.00 | 0.00 |
| ATOM | 1253 | HZ PHE  | 80 | -11.076 | 15.277 | -3.289 | 1.00 | 0.00 |
| ATOM | 1254 | CE2 PHE | 80 | -9.961  | 13.638 | -2.420 | 1.00 | 0.00 |
| ATOM | 1255 | HE2 PHE | 80 | -9.000  | 14.142 | -2.519 | 1.00 | 0.00 |
| ATOM | 1256 | CD2 PHE | 80 | -10.025 | 12.352 | -1.861 | 1.00 | 0.00 |
| ATOM | 1257 | HD2 PHE | 80 | -9.113  | 11.857 | -1.526 | 1.00 | 0.00 |
| ATOM | 1258 | C PHE   | 80 | -10.139 | 8.735  | -2.635 | 1.00 | 0.00 |
| ATOM | 1259 | O PHE   | 80 | -9.843  | 8.701  | -3.818 | 1.00 | 0.00 |
| ATOM | 1260 | N GLN   | 81 | -9.291  | 8.338  | -1.678 | 1.00 | 0.00 |
| ATOM | 1261 | H GLN   | 81 | -9.597  | 8.339  | -0.716 | 1.00 | 0.00 |
| ATOM | 1262 | CA GLN  | 81 | -7.940  | 7.922  | -1.966 | 1.00 | 0.00 |
| ATOM | 1263 | HA GLN  | 81 | -7.482  | 8.639  | -2.647 | 1.00 | 0.00 |
| ATOM | 1264 | CB GLN  | 81 | -7.094  | 7.841  | -0.702 | 1.00 | 0.00 |
| ATOM | 1265 | HB2 GLN | 81 | -7.448  | 7.005  | -0.098 | 1.00 | 0.00 |
| ATOM | 1266 | HB3 GLN | 81 | -6.056  | 7.668  | -0.987 | 1.00 | 0.00 |
| ATOM | 1267 | CG GLN  | 81 | -7.191  | 9.128  | 0.106  | 1.00 | 0.00 |
| ATOM | 1268 | HG2 GLN | 81 | -6.337  | 9.755  | -0.150 | 1.00 | 0.00 |
| ATOM | 1269 | HG3 GLN | 81 | -8.114  | 9.659  | -0.126 | 1.00 | 0.00 |

|      |      |      |     |    |         |        |        |      |      |
|------|------|------|-----|----|---------|--------|--------|------|------|
| ATOM | 1270 | CD   | GLN | 81 | -7.156  | 8.846  | 1.595  | 1.00 | 0.00 |
| ATOM | 1271 | OE1  | GLN | 81 | -7.480  | 7.783  | 2.092  | 1.00 | 0.00 |
| ATOM | 1272 | NE2  | GLN | 81 | -6.774  | 9.853  | 2.349  | 1.00 | 0.00 |
| ATOM | 1273 | HE21 | GLN | 81 | -6.726  | 9.739  | 3.351  | 1.00 | 0.00 |
| ATOM | 1274 | HE22 | GLN | 81 | -6.530  | 10.735 | 1.922  | 1.00 | 0.00 |
| ATOM | 1275 | C    | GLN | 81 | -8.009  | 6.582  | -2.621 | 1.00 | 0.00 |
| ATOM | 1276 | O    | GLN | 81 | -7.557  | 6.497  | -3.731 | 1.00 | 0.00 |
| ATOM | 1277 | N    | SER | 82 | -8.623  | 5.580  | -1.980 | 1.00 | 0.00 |
| ATOM | 1278 | H    | SER | 82 | -9.022  | 5.767  | -1.072 | 1.00 | 0.00 |
| ATOM | 1279 | CA   | SER | 82 | -8.741  | 4.237  | -2.520 | 1.00 | 0.00 |
| ATOM | 1280 | HA   | SER | 82 | -7.810  | 3.693  | -2.360 | 1.00 | 0.00 |
| ATOM | 1281 | CB   | SER | 82 | -9.873  | 3.479  | -1.834 | 1.00 | 0.00 |
| ATOM | 1282 | HB2  | SER | 82 | -9.610  | 3.366  | -0.783 | 1.00 | 0.00 |
| ATOM | 1283 | HB3  | SER | 82 | -10.777 | 4.081  | -1.919 | 1.00 | 0.00 |
| ATOM | 1284 | OG   | SER | 82 | -10.100 | 2.211  | -2.399 | 1.00 | 0.00 |
| ATOM | 1285 | HG   | SER | 82 | -10.819 | 1.777  | -1.934 | 1.00 | 0.00 |
| ATOM | 1286 | C    | SER | 82 | -9.026  | 4.283  | -4.004 | 1.00 | 0.00 |
| ATOM | 1287 | O    | SER | 82 | -8.323  | 3.659  | -4.755 | 1.00 | 0.00 |
| ATOM | 1288 | N    | THR | 83 | -9.963  | 5.129  | -4.420 | 1.00 | 0.00 |
| ATOM | 1289 | H    | THR | 83 | -10.530 | 5.604  | -3.732 | 1.00 | 0.00 |
| ATOM | 1290 | CA   | THR | 83 | -10.285 | 5.312  | -5.818 | 1.00 | 0.00 |
| ATOM | 1291 | HA   | THR | 83 | -10.864 | 4.445  | -6.137 | 1.00 | 0.00 |

|      |      |      |     |    |         |       |        |      |      |
|------|------|------|-----|----|---------|-------|--------|------|------|
| ATOM | 1292 | CB   | THR | 83 | -11.152 | 6.561 | -5.971 | 1.00 | 0.00 |
| ATOM | 1293 | HB   | THR | 83 | -10.977 | 7.188 | -5.097 | 1.00 | 0.00 |
| ATOM | 1294 | CG2  | THR | 83 | -10.855 | 7.359 | -7.237 | 1.00 | 0.00 |
| ATOM | 1295 | HG21 | THR | 83 | -11.030 | 6.732 | -8.112 | 1.00 | 0.00 |
| ATOM | 1296 | HG22 | THR | 83 | -11.508 | 8.231 | -7.279 | 1.00 | 0.00 |
| ATOM | 1297 | HG23 | THR | 83 | -9.815  | 7.684 | -7.226 | 1.00 | 0.00 |
| ATOM | 1298 | OG1  | THR | 83 | -12.467 | 6.105 | -6.095 | 1.00 | 0.00 |
| ATOM | 1299 | HG1  | THR | 83 | -13.058 | 6.855 | -6.195 | 1.00 | 0.00 |
| ATOM | 1300 | C    | THR | 83 | -9.030  | 5.349 | -6.680 | 1.00 | 0.00 |
| ATOM | 1301 | O    | THR | 83 | -8.705  | 4.388 | -7.379 | 1.00 | 0.00 |
| ATOM | 1302 | N    | ARG | 84 | -8.273  | 6.449 | -6.586 | 1.00 | 0.00 |
| ATOM | 1303 | H    | ARG | 84 | -8.553  | 7.191 | -5.962 | 1.00 | 0.00 |
| ATOM | 1304 | CA   | ARG | 84 | -7.076  | 6.623 | -7.355 | 1.00 | 0.00 |
| ATOM | 1305 | HA   | ARG | 84 | -7.273  | 6.377 | -8.399 | 1.00 | 0.00 |
| ATOM | 1306 | CB   | ARG | 84 | -6.584  | 8.069 | -7.278 | 1.00 | 0.00 |
| ATOM | 1307 | HB2  | ARG | 84 | -7.253  | 8.634 | -6.629 | 1.00 | 0.00 |
| ATOM | 1308 | HB3  | ARG | 84 | -5.578  | 8.077 | -6.858 | 1.00 | 0.00 |
| ATOM | 1309 | CG   | ARG | 84 | -6.561  | 8.710 | -8.671 | 1.00 | 0.00 |
| ATOM | 1310 | HG2  | ARG | 84 | -7.590  | 8.894 | -8.979 | 1.00 | 0.00 |
| ATOM | 1311 | HG3  | ARG | 84 | -6.027  | 9.658 | -8.602 | 1.00 | 0.00 |
| ATOM | 1312 | CD   | ARG | 84 | -5.873  | 7.811 | -9.703 | 1.00 | 0.00 |
| ATOM | 1313 | HD2  | ARG | 84 | -5.404  | 6.968 | -9.195 | 1.00 | 0.00 |

|      |      |      |     |    |        |       |         |      |      |
|------|------|------|-----|----|--------|-------|---------|------|------|
| ATOM | 1314 | HD3  | ARG | 84 | -6.613 | 7.440 | -10.413 | 1.00 | 0.00 |
| ATOM | 1315 | NE   | ARG | 84 | -4.838 | 8.551 | -10.444 | 1.00 | 0.00 |
| ATOM | 1316 | HE   | ARG | 84 | -4.506 | 9.399 | -10.007 | 1.00 | 0.00 |
| ATOM | 1317 | CZ   | ARG | 84 | -4.336 | 8.208 | -11.613 | 1.00 | 0.00 |
| ATOM | 1318 | NH1  | ARG | 84 | -4.797 | 7.155 | -12.247 | 1.00 | 0.00 |
| ATOM | 1319 | HH11 | ARG | 84 | -5.539 | 6.606 | -11.836 | 1.00 | 0.00 |
| ATOM | 1320 | HH12 | ARG | 84 | -4.408 | 6.898 | -13.143 | 1.00 | 0.00 |
| ATOM | 1321 | NH2  | ARG | 84 | -3.359 | 8.907 | -12.143 | 1.00 | 0.00 |
| ATOM | 1322 | HH21 | ARG | 84 | -2.992 | 9.709 | -11.652 | 1.00 | 0.00 |
| ATOM | 1323 | HH22 | ARG | 84 | -2.979 | 8.638 | -13.040 | 1.00 | 0.00 |
| ATOM | 1324 | C    | ARG | 84 | -6.005 | 5.708 | -6.836  | 1.00 | 0.00 |
| ATOM | 1325 | O    | ARG | 84 | -5.286 | 5.113 | -7.619  | 1.00 | 0.00 |
| ATOM | 1326 | N    | ILE | 85 | -5.840 | 5.639 | -5.523  | 1.00 | 0.00 |
| ATOM | 1327 | H    | ILE | 85 | -6.375 | 6.286 | -4.962  | 1.00 | 0.00 |
| ATOM | 1328 | CA   | ILE | 85 | -4.892 | 4.785 | -4.861  | 1.00 | 0.00 |
| ATOM | 1329 | HA   | ILE | 85 | -3.860 | 5.097 | -5.021  | 1.00 | 0.00 |
| ATOM | 1330 | CB   | ILE | 85 | -5.174 | 4.702 | -3.355  | 1.00 | 0.00 |
| ATOM | 1331 | HB   | ILE | 85 | -6.252 | 4.744 | -3.198  | 1.00 | 0.00 |
| ATOM | 1332 | CG2  | ILE | 85 | -4.626 | 3.408 | -2.767  | 1.00 | 0.00 |
| ATOM | 1333 | HG21 | ILE | 85 | -3.548 | 3.365 | -2.923  | 1.00 | 0.00 |
| ATOM | 1334 | HG22 | ILE | 85 | -4.839 | 3.374 | -1.699  | 1.00 | 0.00 |
| ATOM | 1335 | HG23 | ILE | 85 | -5.098 | 2.556 | -3.258  | 1.00 | 0.00 |

|      |      |      |     |    |        |        |        |      |      |
|------|------|------|-----|----|--------|--------|--------|------|------|
| ATOM | 1336 | CG1  | ILE | 85 | -4.632 | 5.944  | -2.626 | 1.00 | 0.00 |
| ATOM | 1337 | HG12 | ILE | 85 | -5.173 | 6.819  | -2.985 | 1.00 | 0.00 |
| ATOM | 1338 | HG13 | ILE | 85 | -4.808 | 5.822  | -1.557 | 1.00 | 0.00 |
| ATOM | 1339 | CD1  | ILE | 85 | -3.137 | 6.131  | -2.878 | 1.00 | 0.00 |
| ATOM | 1340 | HD11 | ILE | 85 | -2.961 | 6.253  | -3.947 | 1.00 | 0.00 |
| ATOM | 1341 | HD12 | ILE | 85 | -2.787 | 7.017  | -2.349 | 1.00 | 0.00 |
| ATOM | 1342 | HD13 | ILE | 85 | -2.595 | 5.256  | -2.519 | 1.00 | 0.00 |
| ATOM | 1343 | C    | ILE | 85 | -4.886 | 3.420  | -5.520 | 1.00 | 0.00 |
| ATOM | 1344 | O    | ILE | 85 | -3.832 | 2.838  | -5.671 | 1.00 | 0.00 |
| ATOM | 1345 | N    | TYR | 86 | -6.032 | 2.963  | -5.999 | 1.00 | 0.00 |
| ATOM | 1346 | H    | TYR | 86 | -6.847 | 3.549  | -5.889 | 1.00 | 0.00 |
| ATOM | 1347 | CA   | TYR | 86 | -6.180 | 1.719  | -6.685 | 1.00 | 0.00 |
| ATOM | 1348 | HA   | TYR | 86 | -5.494 | 0.965  | -6.299 | 1.00 | 0.00 |
| ATOM | 1349 | CB   | TYR | 86 | -7.606 | 1.246  | -6.446 | 1.00 | 0.00 |
| ATOM | 1350 | HB2  | TYR | 86 | -8.226 | 2.141  | -6.406 | 1.00 | 0.00 |
| ATOM | 1351 | HB3  | TYR | 86 | -7.898 | 0.639  | -7.304 | 1.00 | 0.00 |
| ATOM | 1352 | CG   | TYR | 86 | -7.794 | 0.445  | -5.174 | 1.00 | 0.00 |
| ATOM | 1353 | CD1  | TYR | 86 | -7.482 | 1.004  | -3.923 | 1.00 | 0.00 |
| ATOM | 1354 | HD1  | TYR | 86 | -7.105 | 2.025  | -3.877 | 1.00 | 0.00 |
| ATOM | 1355 | CE1  | TYR | 86 | -7.650 | 0.264  | -2.743 | 1.00 | 0.00 |
| ATOM | 1356 | HE1  | TYR | 86 | -7.371 | 0.681  | -1.776 | 1.00 | 0.00 |
| ATOM | 1357 | CZ   | TYR | 86 | -8.135 | -1.049 | -2.827 | 1.00 | 0.00 |

|      |      |      |     |    |         |        |         |      |      |
|------|------|------|-----|----|---------|--------|---------|------|------|
| ATOM | 1358 | OH   | TYR | 86 | -8.347  | -1.742 | -1.683  | 1.00 | 0.00 |
| ATOM | 1359 | HH   | TYR | 86 | -8.133  | -1.239 | -0.894  | 1.00 | 0.00 |
| ATOM | 1360 | CE2  | TYR | 86 | -8.450  | -1.628 | -4.068  | 1.00 | 0.00 |
| ATOM | 1361 | HE2  | TYR | 86 | -8.828  | -2.649 | -4.127  | 1.00 | 0.00 |
| ATOM | 1362 | CD2  | TYR | 86 | -8.272  | -0.875 | -5.244  | 1.00 | 0.00 |
| ATOM | 1363 | HD2  | TYR | 86 | -8.505  | -1.316 | -6.214  | 1.00 | 0.00 |
| ATOM | 1364 | C    | TYR | 86 | -5.973  | 1.886  | -8.166  | 1.00 | 0.00 |
| ATOM | 1365 | O    | TYR | 86 | -5.306  | 1.084  | -8.800  | 1.00 | 0.00 |
| ATOM | 1366 | N    | GLN | 87 | -6.478  | 2.969  | -8.749  | 1.00 | 0.00 |
| ATOM | 1367 | H    | GLN | 87 | -7.038  | 3.597  | -8.190  | 1.00 | 0.00 |
| ATOM | 1368 | CA   | GLN | 87 | -6.310  | 3.266  | -10.147 | 1.00 | 0.00 |
| ATOM | 1369 | HA   | GLN | 87 | -6.640  | 2.417  | -10.746 | 1.00 | 0.00 |
| ATOM | 1370 | CB   | GLN | 87 | -7.134  | 4.488  | -10.538 | 1.00 | 0.00 |
| ATOM | 1371 | HB2  | GLN | 87 | -7.855  | 4.695  | -9.748  | 1.00 | 0.00 |
| ATOM | 1372 | HB3  | GLN | 87 | -6.466  | 5.342  | -10.653 | 1.00 | 0.00 |
| ATOM | 1373 | CG   | GLN | 87 | -7.876  | 4.241  | -11.853 | 1.00 | 0.00 |
| ATOM | 1374 | HG2  | GLN | 87 | -7.258  | 4.302  | -12.749 | 1.00 | 0.00 |
| ATOM | 1375 | HG3  | GLN | 87 | -8.251  | 3.224  | -11.740 | 1.00 | 0.00 |
| ATOM | 1376 | CD   | GLN | 87 | -9.062  | 5.182  | -12.014 | 1.00 | 0.00 |
| ATOM | 1377 | OE1  | GLN | 87 | -9.112  | 6.248  | -11.411 | 1.00 | 0.00 |
| ATOM | 1378 | NE2  | GLN | 87 | -9.928  | 4.848  | -12.936 | 1.00 | 0.00 |
| ATOM | 1379 | HE21 | GLN | 87 | -10.739 | 5.428  | -13.097 | 1.00 | 0.00 |

|      |      |      |     |    |        |       |         |      |      |
|------|------|------|-----|----|--------|-------|---------|------|------|
| ATOM | 1380 | HE22 | GLN | 87 | -9.781 | 4.011 | -13.483 | 1.00 | 0.00 |
| ATOM | 1381 | C    | GLN | 87 | -4.847 | 3.495 | -10.476 | 1.00 | 0.00 |
| ATOM | 1382 | O    | GLN | 87 | -4.472 | 3.593 | -11.638 | 1.00 | 0.00 |
| ATOM | 1383 | N    | ILE | 88 | -3.982 | 3.604 | -9.482  | 1.00 | 0.00 |
| ATOM | 1384 | H    | ILE | 88 | -4.355 | 3.610 | -8.543  | 1.00 | 0.00 |
| ATOM | 1385 | CA   | ILE | 88 | -2.569 | 3.786 | -9.654  | 1.00 | 0.00 |
| ATOM | 1386 | HA   | ILE | 88 | -2.293 | 3.786 | -10.709 | 1.00 | 0.00 |
| ATOM | 1387 | CB   | ILE | 88 | -2.143 | 5.109 | -9.015  | 1.00 | 0.00 |
| ATOM | 1388 | HB   | ILE | 88 | -2.486 | 5.127 | -7.981  | 1.00 | 0.00 |
| ATOM | 1389 | CG2  | ILE | 88 | -0.624 | 5.261 | -9.050  | 1.00 | 0.00 |
| ATOM | 1390 | HG21 | ILE | 88 | -0.280 | 5.243 | -10.084 | 1.00 | 0.00 |
| ATOM | 1391 | HG22 | ILE | 88 | -0.343 | 6.208 | -8.591  | 1.00 | 0.00 |
| ATOM | 1392 | HG23 | ILE | 88 | -0.163 | 4.440 | -8.500  | 1.00 | 0.00 |
| ATOM | 1393 | CG1  | ILE | 88 | -2.809 | 6.288 | -9.729  | 1.00 | 0.00 |
| ATOM | 1394 | HG12 | ILE | 88 | -2.266 | 6.503 | -10.649 | 1.00 | 0.00 |
| ATOM | 1395 | HG13 | ILE | 88 | -3.840 | 6.026 | -9.969  | 1.00 | 0.00 |
| ATOM | 1396 | CD1  | ILE | 88 | -2.794 | 7.528 | -8.824  | 1.00 | 0.00 |
| ATOM | 1397 | HD11 | ILE | 88 | -1.764 | 7.790 | -8.584  | 1.00 | 0.00 |
| ATOM | 1398 | HD12 | ILE | 88 | -3.270 | 8.361 | -9.341  | 1.00 | 0.00 |
| ATOM | 1399 | HD13 | ILE | 88 | -3.338 | 7.313 | -7.904  | 1.00 | 0.00 |
| ATOM | 1400 | C    | ILE | 88 | -1.844 | 2.594 | -9.064  | 1.00 | 0.00 |
| ATOM | 1401 | O    | ILE | 88 | -0.661 | 2.438 | -9.277  | 1.00 | 0.00 |



|      |      |     |     |    |        |        |         |      |      |
|------|------|-----|-----|----|--------|--------|---------|------|------|
| ATOM | 1402 | N   | ALA | 89 | -2.544 | 1.733  | -8.346  | 1.00 | 0.00 |
| ATOM | 1403 | H   | ALA | 89 | -3.509 | 1.950  | -8.139  | 1.00 | 0.00 |
| ATOM | 1404 | CA  | ALA | 89 | -1.977 | 0.535  | -7.780  | 1.00 | 0.00 |
| ATOM | 1405 | HA  | ALA | 89 | -0.888 | 0.582  | -7.807  | 1.00 | 0.00 |
| ATOM | 1406 | CB  | ALA | 89 | -2.422 | 0.414  | -6.332  | 1.00 | 0.00 |
| ATOM | 1407 | HB1 | ALA | 89 | -3.510 | 0.356  | -6.289  | 1.00 | 0.00 |
| ATOM | 1408 | HB2 | ALA | 89 | -1.994 | -0.488 | -5.894  | 1.00 | 0.00 |
| ATOM | 1409 | HB3 | ALA | 89 | -2.083 | 1.286  | -5.773  | 1.00 | 0.00 |
| ATOM | 1410 | C   | ALA | 89 | -2.377 | -0.673 | -8.610  | 1.00 | 0.00 |
| ATOM | 1411 | O   | ALA | 89 | -2.041 | -1.807 | -8.281  | 1.00 | 0.00 |
| ATOM | 1412 | N   | LYS | 90 | -3.092 | -0.433 | -9.715  | 1.00 | 0.00 |
| ATOM | 1413 | H   | LYS | 90 | -3.397 | 0.512  | -9.900  | 1.00 | 0.00 |
| ATOM | 1414 | CA  | LYS | 90 | -3.543 | -1.486 | -10.601 | 1.00 | 0.00 |
| ATOM | 1415 | HA  | LYS | 90 | -3.496 | -2.447 | -10.089 | 1.00 | 0.00 |
| ATOM | 1416 | CB  | LYS | 90 | -4.993 | -1.232 | -11.035 | 1.00 | 0.00 |
| ATOM | 1417 | HB2 | LYS | 90 | -5.510 | -2.192 | -11.051 | 1.00 | 0.00 |
| ATOM | 1418 | HB3 | LYS | 90 | -5.455 | -0.583 | -10.291 | 1.00 | 0.00 |
| ATOM | 1419 | CG  | LYS | 90 | -5.091 | -0.582 | -12.405 | 1.00 | 0.00 |
| ATOM | 1420 | HG2 | LYS | 90 | -4.508 | -1.173 | -13.112 | 1.00 | 0.00 |
| ATOM | 1421 | HG3 | LYS | 90 | -6.137 | -0.578 | -12.713 | 1.00 | 0.00 |
| ATOM | 1422 | CD  | LYS | 90 | -4.567 | 0.836  | -12.380 | 1.00 | 0.00 |
| ATOM | 1423 | HD2 | LYS | 90 | -5.252 | 1.454  | -11.799 | 1.00 | 0.00 |

|      |      |          |    |        |        |         |      |      |
|------|------|----------|----|--------|--------|---------|------|------|
| ATOM | 1424 | HD3 LYS  | 90 | -3.585 | 0.839  | -11.907 | 1.00 | 0.00 |
| ATOM | 1425 | CE LYS   | 90 | -4.452 | 1.397  | -13.796 | 1.00 | 0.00 |
| ATOM | 1426 | HE2 LYS  | 90 | -4.027 | 0.628  | -14.442 | 1.00 | 0.00 |
| ATOM | 1427 | HE3 LYS  | 90 | -5.450 | 1.656  | -14.150 | 1.00 | 0.00 |
| ATOM | 1428 | NZ LYS   | 90 | -3.594 | 2.594  | -13.827 | 1.00 | 0.00 |
| ATOM | 1429 | HZ1 LYS  | 90 | -2.669 | 2.354  | -13.500 | 1.00 | 0.00 |
| ATOM | 1430 | HZ2 LYS  | 90 | -3.536 | 2.942  | -14.773 | 1.00 | 0.00 |
| ATOM | 1431 | HZ3 LYS  | 90 | -3.988 | 3.306  | -13.230 | 1.00 | 0.00 |
| ATOM | 1432 | C LYS    | 90 | -2.586 | -1.606 | -11.758 | 1.00 | 0.00 |
| ATOM | 1433 | O LYS    | 90 | -2.604 | -2.580 | -12.492 | 1.00 | 0.00 |
| ATOM | 1434 | N ASN    | 91 | -1.782 | -0.557 | -11.976 | 1.00 | 0.00 |
| ATOM | 1435 | H ASN    | 91 | -1.879 | 0.258  | -11.388 | 1.00 | 0.00 |
| ATOM | 1436 | CA ASN   | 91 | -0.800 | -0.528 | -13.023 | 1.00 | 0.00 |
| ATOM | 1437 | HA ASN   | 91 | -1.121 | -1.165 | -13.848 | 1.00 | 0.00 |
| ATOM | 1438 | CB ASN   | 91 | -0.617 | 0.897  | -13.548 | 1.00 | 0.00 |
| ATOM | 1439 | HB2 ASN  | 91 | 0.261  | 0.885  | -14.193 | 1.00 | 0.00 |
| ATOM | 1440 | HB3 ASN  | 91 | -1.486 | 1.215  | -14.124 | 1.00 | 0.00 |
| ATOM | 1441 | CG ASN   | 91 | -0.386 | 1.888  | -12.439 | 1.00 | 0.00 |
| ATOM | 1442 | OD1 ASN  | 91 | 0.256  | 1.587  | -11.462 | 1.00 | 0.00 |
| ATOM | 1443 | ND2 ASN  | 91 | -0.971 | 3.061  | -12.591 | 1.00 | 0.00 |
| ATOM | 1444 | HD21 ASN | 91 | -0.858 | 3.773  | -11.884 | 1.00 | 0.00 |
| ATOM | 1445 | HD22 ASN | 91 | -1.529 | 3.240  | -13.414 | 1.00 | 0.00 |

|      |      |      |     |    |        |        |         |      |      |
|------|------|------|-----|----|--------|--------|---------|------|------|
| ATOM | 1446 | C    | ASN | 91 | 0.538  | -1.051 | -12.510 | 1.00 | 0.00 |
| ATOM | 1447 | O    | ASN | 91 | 1.534  | -1.016 | -13.224 | 1.00 | 0.00 |
| ATOM | 1448 | N    | LEU | 92 | 0.573  | -1.454 | -11.244 | 1.00 | 0.00 |
| ATOM | 1449 | H    | LEU | 92 | -0.246 | -1.325 | -10.667 | 1.00 | 0.00 |
| ATOM | 1450 | CA   | LEU | 92 | 1.755  | -2.004 | -10.636 | 1.00 | 0.00 |
| ATOM | 1451 | HA   | LEU | 92 | 2.627  | -1.409 | -10.906 | 1.00 | 0.00 |
| ATOM | 1452 | CB   | LEU | 92 | 1.607  | -1.993 | -9.108  | 1.00 | 0.00 |
| ATOM | 1453 | HB2  | LEU | 92 | 0.530  | -1.976 | -8.943  | 1.00 | 0.00 |
| ATOM | 1454 | HB3  | LEU | 92 | 2.025  | -2.906 | -8.683  | 1.00 | 0.00 |
| ATOM | 1455 | CG   | LEU | 92 | 2.247  | -0.775 | -8.432  | 1.00 | 0.00 |
| ATOM | 1456 | HG   | LEU | 92 | 2.065  | 0.109  | -9.043  | 1.00 | 0.00 |
| ATOM | 1457 | CD1  | LEU | 92 | 1.646  | -0.565 | -7.040  | 1.00 | 0.00 |
| ATOM | 1458 | HD11 | LEU | 92 | 1.828  | -1.449 | -6.428  | 1.00 | 0.00 |
| ATOM | 1459 | HD12 | LEU | 92 | 2.109  | 0.303  | -6.571  | 1.00 | 0.00 |
| ATOM | 1460 | HD13 | LEU | 92 | 0.572  | -0.400 | -7.129  | 1.00 | 0.00 |
| ATOM | 1461 | CD2  | LEU | 92 | 3.763  | -0.919 | -8.363  | 1.00 | 0.00 |
| ATOM | 1462 | HD21 | LEU | 92 | 4.166  | -1.010 | -9.372  | 1.00 | 0.00 |
| ATOM | 1463 | HD22 | LEU | 92 | 4.190  | -0.041 | -7.879  | 1.00 | 0.00 |
| ATOM | 1464 | HD23 | LEU | 92 | 4.018  | -1.810 | -7.789  | 1.00 | 0.00 |
| ATOM | 1465 | C    | LEU | 92 | 2.011  | -3.403 | -11.166 | 1.00 | 0.00 |
| ATOM | 1466 | O    | LEU | 92 | 3.093  | -3.662 | -11.651 | 1.00 | 0.00 |
| ATOM | 1467 | N    | PRO | 93 | 0.995  | -4.280 | -11.155 | 1.00 | 0.00 |

|      |      |     |     |    |        |        |         |      |      |
|------|------|-----|-----|----|--------|--------|---------|------|------|
| ATOM | 1468 | CD  | PRO | 93 | -0.349 | -4.029 | -10.662 | 1.00 | 0.00 |
| ATOM | 1469 | HD2 | PRO | 93 | -0.810 | -3.299 | -11.327 | 1.00 | 0.00 |
| ATOM | 1470 | HD3 | PRO | 93 | -0.257 | -3.603 | -9.663  | 1.00 | 0.00 |
| ATOM | 1471 | CG  | PRO | 93 | -1.080 | -5.354 | -10.659 | 1.00 | 0.00 |
| ATOM | 1472 | HG2 | PRO | 93 | -1.920 | -5.303 | -11.352 | 1.00 | 0.00 |
| ATOM | 1473 | HG3 | PRO | 93 | -1.451 | -5.558 | -9.655  | 1.00 | 0.00 |
| ATOM | 1474 | CB  | PRO | 93 | -0.062 | -6.412 | -11.091 | 1.00 | 0.00 |
| ATOM | 1475 | HB2 | PRO | 93 | -0.473 | -7.087 | -11.842 | 1.00 | 0.00 |
| ATOM | 1476 | HB3 | PRO | 93 | 0.276  | -6.989 | -10.231 | 1.00 | 0.00 |
| ATOM | 1477 | CA  | PRO | 93 | 1.107  | -5.626 | -11.684 | 1.00 | 0.00 |
| ATOM | 1478 | HA  | PRO | 93 | 2.024  | -6.066 | -11.291 | 1.00 | 0.00 |
| ATOM | 1479 | C   | PRO | 93 | 1.142  | -5.656 | -13.202 | 1.00 | 0.00 |
| ATOM | 1480 | O   | PRO | 93 | 1.265  | -6.723 | -13.799 | 1.00 | 0.00 |
| ATOM | 1481 | N   | ASN | 94 | 1.035  | -4.473 | -13.812 | 1.00 | 0.00 |
| ATOM | 1482 | H   | ASN | 94 | 0.932  | -3.634 | -13.259 | 1.00 | 0.00 |
| ATOM | 1483 | CA  | ASN | 94 | 1.066  | -4.347 | -15.239 | 1.00 | 0.00 |
| ATOM | 1484 | HA  | ASN | 94 | 0.629  | -5.232 | -15.702 | 1.00 | 0.00 |
| ATOM | 1485 | CB  | ASN | 94 | 0.261  | -3.121 | -15.673 | 1.00 | 0.00 |
| ATOM | 1486 | HB2 | ASN | 94 | 0.491  | -2.286 | -15.012 | 1.00 | 0.00 |
| ATOM | 1487 | HB3 | ASN | 94 | 0.541  | -2.863 | -16.694 | 1.00 | 0.00 |
| ATOM | 1488 | CG  | ASN | 94 | -1.228 | -3.376 | -15.630 | 1.00 | 0.00 |
| ATOM | 1489 | OD1 | ASN | 94 | -1.704 | -4.496 | -15.563 | 1.00 | 0.00 |

|      |      |      |     |    |        |        |         |      |      |
|------|------|------|-----|----|--------|--------|---------|------|------|
| ATOM | 1490 | ND2  | ASN | 94 | -1.985 | -2.294 | -15.662 | 1.00 | 0.00 |
| ATOM | 1491 | HD21 | ASN | 94 | -2.991 | -2.384 | -15.637 | 1.00 | 0.00 |
| ATOM | 1492 | HD22 | ASN | 94 | -1.555 | -1.382 | -15.712 | 1.00 | 0.00 |
| ATOM | 1493 | C    | ASN | 94 | 2.495  | -4.184 | -15.715 | 1.00 | 0.00 |
| ATOM | 1494 | O    | ASN | 94 | 2.882  | -4.727 | -16.742 | 1.00 | 0.00 |
| ATOM | 1495 | N    | VAL | 95 | 3.277  | -3.411 | -14.959 | 1.00 | 0.00 |
| ATOM | 1496 | H    | VAL | 95 | 2.881  | -2.932 | -14.163 | 1.00 | 0.00 |
| ATOM | 1497 | CA   | VAL | 95 | 4.670  | -3.171 | -15.282 | 1.00 | 0.00 |
| ATOM | 1498 | HA   | VAL | 95 | 4.931  | -3.536 | -16.276 | 1.00 | 0.00 |
| ATOM | 1499 | CB   | VAL | 95 | 4.959  | -1.670 | -15.220 | 1.00 | 0.00 |
| ATOM | 1500 | HB   | VAL | 95 | 4.824  | -1.330 | -14.193 | 1.00 | 0.00 |
| ATOM | 1501 | CG1  | VAL | 95 | 6.386  | -1.368 | -15.673 | 1.00 | 0.00 |
| ATOM | 1502 | HG11 | VAL | 95 | 6.521  | -1.708 | -16.700 | 1.00 | 0.00 |
| ATOM | 1503 | HG12 | VAL | 95 | 6.565  | -0.295 | -15.619 | 1.00 | 0.00 |
| ATOM | 1504 | HG13 | VAL | 95 | 7.091  | -1.887 | -15.024 | 1.00 | 0.00 |
| ATOM | 1505 | CG2  | VAL | 95 | 3.957  | -0.892 | -16.085 | 1.00 | 0.00 |
| ATOM | 1506 | HG21 | VAL | 95 | 2.945  | -1.073 | -15.721 | 1.00 | 0.00 |
| ATOM | 1507 | HG22 | VAL | 95 | 4.178  | 0.173  | -16.029 | 1.00 | 0.00 |
| ATOM | 1508 | HG23 | VAL | 95 | 4.035  | -1.225 | -17.120 | 1.00 | 0.00 |
| ATOM | 1509 | C    | VAL | 95 | 5.567  | -3.962 | -14.342 | 1.00 | 0.00 |
| ATOM | 1510 | O    | VAL | 95 | 6.774  | -4.028 | -14.524 | 1.00 | 0.00 |
| ATOM | 1511 | N    | CYX | 96 | 4.962  | -4.621 | -13.358 | 1.00 | 0.00 |

|      |      |      |     |    |       |         |         |      |      |
|------|------|------|-----|----|-------|---------|---------|------|------|
| ATOM | 1512 | H    | CYX | 96 | 3.965 | -4.509  | -13.246 | 1.00 | 0.00 |
| ATOM | 1513 | CA   | CYX | 96 | 5.671 | -5.413  | -12.393 | 1.00 | 0.00 |
| ATOM | 1514 | HA   | CYX | 96 | 6.710 | -5.509  | -12.708 | 1.00 | 0.00 |
| ATOM | 1515 | CB   | CYX | 96 | 5.639 | -4.788  | -10.998 | 1.00 | 0.00 |
| ATOM | 1516 | HB2  | CYX | 96 | 4.636 | -4.880  | -10.581 | 1.00 | 0.00 |
| ATOM | 1517 | HB3  | CYX | 96 | 6.349 | -5.304  | -10.352 | 1.00 | 0.00 |
| ATOM | 1518 | SG   | CYX | 96 | 6.060 | -3.053  | -10.963 | 1.00 | 0.00 |
| ATOM | 1519 | C    | CYX | 96 | 5.091 | -6.789  | -12.413 | 1.00 | 0.00 |
| ATOM | 1520 | O    | CYX | 96 | 4.965 | -7.323  | -11.337 | 1.00 | 0.00 |
| ATOM | 1521 | N    | ASN | 97 | 4.714 | -7.312  | -13.591 | 1.00 | 0.00 |
| ATOM | 1522 | H    | ASN | 97 | 4.843 | -6.746  | -14.417 | 1.00 | 0.00 |
| ATOM | 1523 | CA   | ASN | 97 | 4.137 | -8.630  | -13.746 | 1.00 | 0.00 |
| ATOM | 1524 | HA   | ASN | 97 | 3.050 | -8.555  | -13.771 | 1.00 | 0.00 |
| ATOM | 1525 | CB   | ASN | 97 | 4.611 | -9.278  | -15.047 | 1.00 | 0.00 |
| ATOM | 1526 | HB2  | ASN | 97 | 5.593 | -8.897  | -15.327 | 1.00 | 0.00 |
| ATOM | 1527 | HB3  | ASN | 97 | 4.673 | -10.354 | -14.882 | 1.00 | 0.00 |
| ATOM | 1528 | CG   | ASN | 97 | 3.655 | -9.020  | -16.179 | 1.00 | 0.00 |
| ATOM | 1529 | OD1  | ASN | 97 | 2.924 | -9.890  | -16.622 | 1.00 | 0.00 |
| ATOM | 1530 | ND2  | ASN | 97 | 3.645 | -7.784  | -16.628 | 1.00 | 0.00 |
| ATOM | 1531 | HD21 | ASN | 97 | 3.029 | -7.531  | -17.388 | 1.00 | 0.00 |
| ATOM | 1532 | HD22 | ASN | 97 | 4.253 | -7.094  | -16.211 | 1.00 | 0.00 |
| ATOM | 1533 | C    | ASN | 97 | 4.533 | -9.549  | -12.592 | 1.00 | 0.00 |

|      |      |     |     |    |       |         |         |      |      |
|------|------|-----|-----|----|-------|---------|---------|------|------|
| ATOM | 1534 | O   | ASN | 97 | 5.636 | -10.096 | -12.586 | 1.00 | 0.00 |
| ATOM | 1535 | N   | MET | 98 | 3.664 | -9.628  | -11.587 | 1.00 | 0.00 |
| ATOM | 1536 | H   | MET | 98 | 2.789 | -9.126  | -11.639 | 1.00 | 0.00 |
| ATOM | 1537 | CA  | MET | 98 | 3.964 | -10.358 | -10.376 | 1.00 | 0.00 |
| ATOM | 1538 | HA  | MET | 98 | 4.812 | -11.019 | -10.558 | 1.00 | 0.00 |
| ATOM | 1539 | CB  | MET | 98 | 4.313 | -9.423  | -9.220  | 1.00 | 0.00 |
| ATOM | 1540 | HB2 | MET | 98 | 4.652 | -10.023 | -8.375  | 1.00 | 0.00 |
| ATOM | 1541 | HB3 | MET | 98 | 5.115 | -8.757  | -9.538  | 1.00 | 0.00 |
| ATOM | 1542 | CG  | MET | 98 | 3.102 | -8.596  | -8.802  | 1.00 | 0.00 |
| ATOM | 1543 | HG2 | MET | 98 | 2.238 | -8.945  | -9.367  | 1.00 | 0.00 |
| ATOM | 1544 | HG3 | MET | 98 | 2.928 | -8.757  | -7.738  | 1.00 | 0.00 |
| ATOM | 1545 | SD  | MET | 98 | 3.335 | -6.851  | -9.102  | 1.00 | 0.00 |
| ATOM | 1546 | CE  | MET | 98 | 2.002 | -6.156  | -8.168  | 1.00 | 0.00 |
| ATOM | 1547 | HE1 | MET | 98 | 2.110 | -6.433  | -7.119  | 1.00 | 0.00 |
| ATOM | 1548 | HE2 | MET | 98 | 2.020 | -5.070  | -8.261  | 1.00 | 0.00 |
| ATOM | 1549 | HE3 | MET | 98 | 1.054 | -6.537  | -8.548  | 1.00 | 0.00 |
| ATOM | 1550 | C   | MET | 98 | 2.789 | -11.239 | -10.033 | 1.00 | 0.00 |
| ATOM | 1551 | O   | MET | 98 | 2.718 | -11.807 | -8.953  | 1.00 | 0.00 |
| ATOM | 1552 | N   | LYS | 99 | 1.805 | -11.319 | -10.937 | 1.00 | 0.00 |
| ATOM | 1553 | H   | LYS | 99 | 1.852 | -10.710 | -11.742 | 1.00 | 0.00 |
| ATOM | 1554 | CA  | LYS | 99 | 0.616 | -12.103 | -10.745 | 1.00 | 0.00 |
| ATOM | 1555 | HA  | LYS | 99 | 0.816 | -12.929 | -10.062 | 1.00 | 0.00 |

|      |      |     |     |     |        |         |         |      |      |
|------|------|-----|-----|-----|--------|---------|---------|------|------|
| ATOM | 1556 | CB  | LYS | 99  | -0.492 | -11.226 | -10.143 | 1.00 | 0.00 |
| ATOM | 1557 | HB2 | LYS | 99  | -0.422 | -11.277 | -9.057  | 1.00 | 0.00 |
| ATOM | 1558 | HB3 | LYS | 99  | -0.335 | -10.198 | -10.469 | 1.00 | 0.00 |
| ATOM | 1559 | CG  | LYS | 99  | -1.884 | -11.697 | -10.588 | 1.00 | 0.00 |
| ATOM | 1560 | HG2 | LYS | 99  | -1.819 | -12.731 | -10.928 | 1.00 | 0.00 |
| ATOM | 1561 | HG3 | LYS | 99  | -2.568 | -11.636 | -9.742  | 1.00 | 0.00 |
| ATOM | 1562 | CD  | LYS | 99  | -2.407 | -10.810 | -11.737 | 1.00 | 0.00 |
| ATOM | 1563 | HD2 | LYS | 99  | -3.124 | -10.098 | -11.329 | 1.00 | 0.00 |
| ATOM | 1564 | HD3 | LYS | 99  | -1.566 | -10.270 | -12.171 | 1.00 | 0.00 |
| ATOM | 1565 | CE  | LYS | 99  | -3.090 | -11.659 | -12.828 | 1.00 | 0.00 |
| ATOM | 1566 | HE2 | LYS | 99  | -2.927 | -12.713 | -12.601 | 1.00 | 0.00 |
| ATOM | 1567 | HE3 | LYS | 99  | -4.159 | -11.446 | -12.816 | 1.00 | 0.00 |
| ATOM | 1568 | NZ  | LYS | 99  | -2.542 | -11.353 | -14.167 | 1.00 | 0.00 |
| ATOM | 1569 | HZ1 | LYS | 99  | -1.552 | -11.551 | -14.179 | 1.00 | 0.00 |
| ATOM | 1570 | HZ2 | LYS | 99  | -3.007 | -11.923 | -14.859 | 1.00 | 0.00 |
| ATOM | 1571 | HZ3 | LYS | 99  | -2.693 | -10.377 | -14.378 | 1.00 | 0.00 |
| ATOM | 1572 | C   | LYS | 99  | 0.280  | -12.794 | -12.047 | 1.00 | 0.00 |
| ATOM | 1573 | O   | LYS | 99  | -0.409 | -12.261 | -12.893 | 1.00 | 0.00 |
| ATOM | 1574 | N   | GLN | 100 | 0.785  | -13.986 | -12.256 | 1.00 | 0.00 |
| ATOM | 1575 | H   | GLN | 100 | 1.428  | -14.391 | -11.591 | 1.00 | 0.00 |
| ATOM | 1576 | CA  | GLN | 100 | 0.489  | -14.727 | -13.460 | 1.00 | 0.00 |
| ATOM | 1577 | HA  | GLN | 100 | 0.557  | -14.074 | -14.330 | 1.00 | 0.00 |



|      |      |      |     |     |        |         |         |      |      |
|------|------|------|-----|-----|--------|---------|---------|------|------|
| ATOM | 1578 | CB   | GLN | 100 | 1.497  | -15.870 | -13.625 | 1.00 | 0.00 |
| ATOM | 1579 | HB2  | GLN | 100 | 2.406  | -15.627 | -13.075 | 1.00 | 0.00 |
| ATOM | 1580 | HB3  | GLN | 100 | 1.065  | -16.788 | -13.225 | 1.00 | 0.00 |
| ATOM | 1581 | CG   | GLN | 100 | 1.835  | -16.068 | -15.107 | 1.00 | 0.00 |
| ATOM | 1582 | HG2  | GLN | 100 | 1.968  | -15.076 | -15.538 | 1.00 | 0.00 |
| ATOM | 1583 | HG3  | GLN | 100 | 2.757  | -16.639 | -15.218 | 1.00 | 0.00 |
| ATOM | 1584 | CD   | GLN | 100 | 0.725  | -16.784 | -15.867 | 1.00 | 0.00 |
| ATOM | 1585 | OE1  | GLN | 100 | -0.335 | -17.093 | -15.361 | 1.00 | 0.00 |
| ATOM | 1586 | NE2  | GLN | 100 | 0.989  | -17.102 | -17.112 | 1.00 | 0.00 |
| ATOM | 1587 | HE21 | GLN | 100 | 0.292  | -17.578 | -17.667 | 1.00 | 0.00 |
| ATOM | 1588 | HE22 | GLN | 100 | 1.888  | -16.870 | -17.510 | 1.00 | 0.00 |
| ATOM | 1589 | C    | GLN | 100 | -0.935 | -15.258 | -13.422 | 1.00 | 0.00 |
| ATOM | 1590 | O    | GLN | 100 | -1.696 | -15.047 | -14.359 | 1.00 | 0.00 |
| ATOM | 1591 | N    | ILE | 101 | -1.286 | -15.901 | -12.308 | 1.00 | 0.00 |
| ATOM | 1592 | H    | ILE | 101 | -0.588 | -16.090 | -11.603 | 1.00 | 0.00 |
| ATOM | 1593 | CA   | ILE | 101 | -2.603 | -16.451 | -12.128 | 1.00 | 0.00 |
| ATOM | 1594 | HA   | ILE | 101 | -2.912 | -17.064 | -12.975 | 1.00 | 0.00 |
| ATOM | 1595 | CB   | ILE | 101 | -2.681 | -17.285 | -10.836 | 1.00 | 0.00 |
| ATOM | 1596 | HB   | ILE | 101 | -2.255 | -18.270 | -11.026 | 1.00 | 0.00 |
| ATOM | 1597 | CG2  | ILE | 101 | -1.912 | -16.608 | -9.712  | 1.00 | 0.00 |
| ATOM | 1598 | HG21 | ILE | 101 | -2.338 | -15.623 | -9.522  | 1.00 | 0.00 |
| ATOM | 1599 | HG22 | ILE | 101 | -1.980 | -17.214 | -8.809  | 1.00 | 0.00 |

|      |      |      |     |     |        |         |         |      |      |
|------|------|------|-----|-----|--------|---------|---------|------|------|
| ATOM | 1600 | HG23 | ILE | 101 | -0.866 | -16.502 | -10.000 | 1.00 | 0.00 |
| ATOM | 1601 | CG1  | ILE | 101 | -4.136 | -17.560 | -10.422 | 1.00 | 0.00 |
| ATOM | 1602 | HG12 | ILE | 101 | -4.155 | -18.420 | -9.752  | 1.00 | 0.00 |
| ATOM | 1603 | HG13 | ILE | 101 | -4.525 | -16.686 | -9.901  | 1.00 | 0.00 |
| ATOM | 1604 | CD1  | ILE | 101 | -5.005 | -17.851 | -11.652 | 1.00 | 0.00 |
| ATOM | 1605 | HD11 | ILE | 101 | -4.616 | -18.726 | -12.173 | 1.00 | 0.00 |
| ATOM | 1606 | HD12 | ILE | 101 | -6.030 | -18.043 | -11.336 | 1.00 | 0.00 |
| ATOM | 1607 | HD13 | ILE | 101 | -4.987 | -16.992 | -12.322 | 1.00 | 0.00 |
| ATOM | 1608 | C    | ILE | 101 | -3.634 | -15.320 | -12.191 | 1.00 | 0.00 |
| ATOM | 1609 | O    | ILE | 101 | -4.158 | -14.986 | -13.248 | 1.00 | 0.00 |
| ATOM | 1610 | N    | GLY | 102 | -3.933 | -14.705 | -11.042 | 1.00 | 0.00 |
| ATOM | 1611 | H    | GLY | 102 | -3.440 | -14.971 | -10.201 | 1.00 | 0.00 |
| ATOM | 1612 | CA   | GLY | 102 | -4.931 | -13.676 | -10.950 | 1.00 | 0.00 |
| ATOM | 1613 | HA2  | GLY | 102 | -4.464 | -12.714 | -11.161 | 1.00 | 0.00 |
| ATOM | 1614 | HA3  | GLY | 102 | -5.707 | -13.873 | -11.690 | 1.00 | 0.00 |
| ATOM | 1615 | C    | GLY | 102 | -5.559 | -13.626 | -9.584  | 1.00 | 0.00 |
| ATOM | 1616 | O    | GLY | 102 | -6.657 | -14.092 | -9.349  | 1.00 | 0.00 |
| ATOM | 1617 | N    | THR | 103 | -4.846 | -13.034 | -8.646  | 1.00 | 0.00 |
| ATOM | 1618 | H    | THR | 103 | -3.930 | -12.687 | -8.891  | 1.00 | 0.00 |
| ATOM | 1619 | CA   | THR | 103 | -5.279 | -12.923 | -7.258  | 1.00 | 0.00 |
| ATOM | 1620 | HA   | THR | 103 | -5.837 | -13.835 | -7.044  | 1.00 | 0.00 |
| ATOM | 1621 | CB   | THR | 103 | -4.039 | -12.886 | -6.361  | 1.00 | 0.00 |

|      |      |      |     |     |        |         |        |      |      |
|------|------|------|-----|-----|--------|---------|--------|------|------|
| ATOM | 1622 | HB   | THR | 103 | -4.055 | -11.957 | -5.792 | 1.00 | 0.00 |
| ATOM | 1623 | CG2  | THR | 103 | -4.002 | -14.071 | -5.399 | 1.00 | 0.00 |
| ATOM | 1624 | HG21 | THR | 103 | -3.986 | -15.001 | -5.968 | 1.00 | 0.00 |
| ATOM | 1625 | HG22 | THR | 103 | -3.107 | -14.009 | -4.780 | 1.00 | 0.00 |
| ATOM | 1626 | HG23 | THR | 103 | -4.886 | -14.051 | -4.762 | 1.00 | 0.00 |
| ATOM | 1627 | OG1  | THR | 103 | -2.887 | -13.063 | -7.185 | 1.00 | 0.00 |
| ATOM | 1628 | HG1  | THR | 103 | -2.097 | -13.043 | -6.640 | 1.00 | 0.00 |
| ATOM | 1629 | C    | THR | 103 | -6.158 | -11.699 | -7.092 | 1.00 | 0.00 |
| ATOM | 1630 | O    | THR | 103 | -7.276 | -11.796 | -6.588 | 1.00 | 0.00 |
| ATOM | 1631 | N    | CYX | 104 | -5.670 | -10.540 | -7.555 | 1.00 | 0.00 |
| ATOM | 1632 | H    | CYX | 104 | -4.711 | -10.503 | -7.870 | 1.00 | 0.00 |
| ATOM | 1633 | CA   | CYX | 104 | -6.432 | -9.307  | -7.526 | 1.00 | 0.00 |
| ATOM | 1634 | HA   | CYX | 104 | -7.471 | -9.519  | -7.274 | 1.00 | 0.00 |
| ATOM | 1635 | CB   | CYX | 104 | -5.858 | -8.352  | -6.475 | 1.00 | 0.00 |
| ATOM | 1636 | HB2  | CYX | 104 | -6.581 | -7.564  | -6.266 | 1.00 | 0.00 |
| ATOM | 1637 | HB3  | CYX | 104 | -5.648 | -8.904  | -5.559 | 1.00 | 0.00 |
| ATOM | 1638 | SG   | CYX | 104 | -4.283 | -7.505  | -6.891 | 1.00 | 0.00 |
| ATOM | 1639 | C    | CYX | 104 | -6.468 | -8.705  | -8.923 | 1.00 | 0.00 |
| ATOM | 1640 | O    | CYX | 104 | -5.857 | -7.678  | -9.192 | 1.00 | 0.00 |
| ATOM | 1641 | N    | PRO | 105 | -7.134 | -9.382  | -9.860 | 1.00 | 0.00 |
| ATOM | 1642 | CD   | PRO | 105 | -7.867 | -10.622 | -9.663 | 1.00 | 0.00 |
| ATOM | 1643 | HD2  | PRO | 105 | -8.718 | -10.407 | -9.016 | 1.00 | 0.00 |

|      |      |         |     |        |         |         |      |      |
|------|------|---------|-----|--------|---------|---------|------|------|
| ATOM | 1644 | HD3 PRO | 105 | -7.202 | -11.328 | -9.165  | 1.00 | 0.00 |
| ATOM | 1645 | CG PRO  | 105 | -8.291 | -11.101 | -11.049 | 1.00 | 0.00 |
| ATOM | 1646 | HG2 PRO | 105 | -9.380 | -11.117 | -11.103 | 1.00 | 0.00 |
| ATOM | 1647 | HG3 PRO | 105 | -7.906 | -12.108 | -11.212 | 1.00 | 0.00 |
| ATOM | 1648 | CB PRO  | 105 | -7.695 | -10.118 | -12.059 | 1.00 | 0.00 |
| ATOM | 1649 | HB2 PRO | 105 | -8.420 | -9.808  | -12.811 | 1.00 | 0.00 |
| ATOM | 1650 | HB3 PRO | 105 | -6.829 | -10.560 | -12.551 | 1.00 | 0.00 |
| ATOM | 1651 | CA PRO  | 105 | -7.263 | -8.913  | -11.226 | 1.00 | 0.00 |
| ATOM | 1652 | HA PRO  | 105 | -6.271 | -8.633  | -11.581 | 1.00 | 0.00 |
| ATOM | 1653 | C PRO   | 105 | -8.200 | -7.720  | -11.345 | 1.00 | 0.00 |
| ATOM | 1654 | O PRO   | 105 | -9.148 | -7.723  | -12.120 | 1.00 | 0.00 |
| ATOM | 1655 | N PHE   | 106 | -7.951 | -6.695  | -10.540 | 1.00 | 0.00 |
| ATOM | 1656 | H PHE   | 106 | -7.151 | -6.744  | -9.926  | 1.00 | 0.00 |
| ATOM | 1657 | CA PHE  | 106 | -8.757 | -5.508  | -10.514 | 1.00 | 0.00 |
| ATOM | 1658 | HA PHE  | 106 | -9.793 | -5.731  | -10.770 | 1.00 | 0.00 |
| ATOM | 1659 | CB PHE  | 106 | -8.715 | -4.949  | -9.096  | 1.00 | 0.00 |
| ATOM | 1660 | HB2 PHE | 106 | -9.647 | -4.446  | -8.839  | 1.00 | 0.00 |
| ATOM | 1661 | HB3 PHE | 106 | -8.547 | -5.776  | -8.406  | 1.00 | 0.00 |
| ATOM | 1662 | CG PHE  | 106 | -7.600 | -3.948  | -8.854  | 1.00 | 0.00 |
| ATOM | 1663 | CD1 PHE | 106 | -6.276 | -4.381  | -8.691  | 1.00 | 0.00 |
| ATOM | 1664 | HD1 PHE | 106 | -6.054 | -5.448  | -8.736  | 1.00 | 0.00 |
| ATOM | 1665 | CE1 PHE | 106 | -5.247 | -3.462  | -8.473  | 1.00 | 0.00 |

|      |      |          |     |         |        |         |      |      |
|------|------|----------|-----|---------|--------|---------|------|------|
| ATOM | 1666 | HE1 PHE  | 106 | -4.215  | -3.800 | -8.374  | 1.00 | 0.00 |
| ATOM | 1667 | CZ PHE   | 106 | -5.548  | -2.104 | -8.383  | 1.00 | 0.00 |
| ATOM | 1668 | HZ PHE   | 106 | -4.761  | -1.389 | -8.145  | 1.00 | 0.00 |
| ATOM | 1669 | CE2 PHE  | 106 | -6.857  | -1.658 | -8.597  | 1.00 | 0.00 |
| ATOM | 1670 | HE2 PHE  | 106 | -7.076  | -0.591 | -8.580  | 1.00 | 0.00 |
| ATOM | 1671 | CD2 PHE  | 106 | -7.881  | -2.576 | -8.832  | 1.00 | 0.00 |
| ATOM | 1672 | HD2 PHE  | 106 | -8.900  | -2.226 | -8.999  | 1.00 | 0.00 |
| ATOM | 1673 | C PHE    | 106 | -8.221  | -4.475 | -11.458 | 1.00 | 0.00 |
| ATOM | 1674 | O PHE    | 106 | -7.024  | -4.508 | -11.734 | 1.00 | 0.00 |
| ATOM | 1675 | N ILE    | 107 | -9.082  | -3.550 | -11.885 | 1.00 | 0.00 |
| ATOM | 1676 | H ILE    | 107 | -10.042 | -3.601 | -11.576 | 1.00 | 0.00 |
| ATOM | 1677 | CA ILE   | 107 | -8.718  | -2.511 | -12.831 | 1.00 | 0.00 |
| ATOM | 1678 | HA ILE   | 107 | -8.110  | -1.733 | -12.370 | 1.00 | 0.00 |
| ATOM | 1679 | CB ILE   | 107 | -7.973  | -3.088 | -14.055 | 1.00 | 0.00 |
| ATOM | 1680 | HB ILE   | 107 | -8.287  | -2.547 | -14.948 | 1.00 | 0.00 |
| ATOM | 1681 | CG2 ILE  | 107 | -6.453  | -2.946 | -13.878 | 1.00 | 0.00 |
| ATOM | 1682 | HG21 ILE | 107 | -6.139  | -3.488 | -12.986 | 1.00 | 0.00 |
| ATOM | 1683 | HG22 ILE | 107 | -5.945  | -3.358 | -14.750 | 1.00 | 0.00 |
| ATOM | 1684 | HG23 ILE | 107 | -6.196  | -1.892 | -13.773 | 1.00 | 0.00 |
| ATOM | 1685 | CG1 ILE  | 107 | -8.373  | -4.555 | -14.330 | 1.00 | 0.00 |
| ATOM | 1686 | HG12 ILE | 107 | -7.662  | -5.209 | -13.824 | 1.00 | 0.00 |
| ATOM | 1687 | HG13 ILE | 107 | -9.371  | -4.723 | -13.926 | 1.00 | 0.00 |

|      |      |      |     |     |         |        |         |      |      |
|------|------|------|-----|-----|---------|--------|---------|------|------|
| ATOM | 1688 | CD1  | ILE | 107 | -8.371  | -4.859 | -15.808 | 1.00 | 0.00 |
| ATOM | 1689 | HD11 | ILE | 107 | -7.373  | -4.692 | -16.213 | 1.00 | 0.00 |
| ATOM | 1690 | HD12 | ILE | 107 | -8.657  | -5.899 | -15.966 | 1.00 | 0.00 |
| ATOM | 1691 | HD13 | ILE | 107 | -9.082  | -4.207 | -16.315 | 1.00 | 0.00 |
| ATOM | 1692 | C    | ILE | 107 | -9.950  | -1.750 | -13.269 | 1.00 | 0.00 |
| ATOM | 1693 | O    | ILE | 107 | -9.867  | -0.537 | -13.404 | 1.00 | 0.00 |
| ATOM | 1694 | N    | ALA | 108 | -11.065 | -2.459 | -13.481 | 1.00 | 0.00 |
| ATOM | 1695 | H    | ALA | 108 | -11.019 | -3.467 | -13.430 | 1.00 | 0.00 |
| ATOM | 1696 | CA   | ALA | 108 | -12.320 | -1.849 | -13.856 | 1.00 | 0.00 |
| ATOM | 1697 | HA   | ALA | 108 | -12.159 | -1.130 | -14.659 | 1.00 | 0.00 |
| ATOM | 1698 | CB   | ALA | 108 | -13.275 | -2.932 | -14.355 | 1.00 | 0.00 |
| ATOM | 1699 | HB1  | ALA | 108 | -13.454 | -3.655 | -13.559 | 1.00 | 0.00 |
| ATOM | 1700 | HB2  | ALA | 108 | -14.220 | -2.476 | -14.650 | 1.00 | 0.00 |
| ATOM | 1701 | HB3  | ALA | 108 | -12.834 | -3.439 | -15.213 | 1.00 | 0.00 |
| ATOM | 1702 | C    | ALA | 108 | -12.903 | -1.067 | -12.680 | 1.00 | 0.00 |
| ATOM | 1703 | O    | ALA | 108 | -13.942 | -1.426 | -12.139 | 1.00 | 0.00 |
| ATOM | 1704 | N    | ILE | 109 | -12.214 | -0.013 | -12.272 | 1.00 | 0.00 |
| ATOM | 1705 | H    | ILE | 109 | -11.328 | 0.155  | -12.726 | 1.00 | 0.00 |
| ATOM | 1706 | CA   | ILE | 109 | -12.576 | 0.818  | -11.147 | 1.00 | 0.00 |
| ATOM | 1707 | HA   | ILE | 109 | -13.623 | 0.697  | -10.867 | 1.00 | 0.00 |
| ATOM | 1708 | CB   | ILE | 109 | -11.683 | 0.534  | -9.927  | 1.00 | 0.00 |
| ATOM | 1709 | HB   | ILE | 109 | -11.549 | 1.457  | -9.364  | 1.00 | 0.00 |

|      |      |      |     |     |         |         |         |      |      |
|------|------|------|-----|-----|---------|---------|---------|------|------|
| ATOM | 1710 | CG2  | ILE | 109 | -12.327 | -0.528  | -9.022  | 1.00 | 0.00 |
| ATOM | 1711 | HG21 | ILE | 109 | -12.461 | -1.452  | -9.584  | 1.00 | 0.00 |
| ATOM | 1712 | HG22 | ILE | 109 | -11.681 | -0.716  | -8.165  | 1.00 | 0.00 |
| ATOM | 1713 | HG23 | ILE | 109 | -13.296 | -0.171  | -8.675  | 1.00 | 0.00 |
| ATOM | 1714 | CG1  | ILE | 109 | -10.258 | 0.124   | -10.326 | 1.00 | 0.00 |
| ATOM | 1715 | HG12 | ILE | 109 | -9.725  | -0.210  | -9.436  | 1.00 | 0.00 |
| ATOM | 1716 | HG13 | ILE | 109 | -10.315 | -0.695  | -11.043 | 1.00 | 0.00 |
| ATOM | 1717 | CD1  | ILE | 109 | -9.514  | 1.296   | -10.953 | 1.00 | 0.00 |
| ATOM | 1718 | HD11 | ILE | 109 | -9.456  | 2.115   | -10.237 | 1.00 | 0.00 |
| ATOM | 1719 | HD12 | ILE | 109 | -8.507  | 0.982   | -11.228 | 1.00 | 0.00 |
| ATOM | 1720 | HD13 | ILE | 109 | -10.046 | 1.630   | -11.844 | 1.00 | 0.00 |
| ATOM | 1721 | C    | ILE | 109 | -12.580 | 2.293   | -11.578 | 1.00 | 0.00 |
| ATOM | 1722 | O    | ILE | 109 | -13.607 | 2.953   | -11.392 | 1.00 | 0.00 |
| ATOM | 1723 | OXT  | ILE | 109 | -11.567 | 2.788   | -12.106 | 1.00 | 0.00 |
| TER  |      |      |     |     |         |         |         |      |      |
| ATOM | 1724 | S1   | LIG | 110 | 18.164  | -15.327 | -4.429  | 1.00 | 0.00 |
| ATOM | 1725 | O1   | LIG | 110 | 20.188  | -19.119 | -2.802  | 1.00 | 0.00 |
| ATOM | 1726 | O2   | LIG | 110 | 16.769  | -14.735 | -5.050  | 1.00 | 0.00 |
| ATOM | 1727 | O3   | LIG | 110 | 18.640  | -14.927 | -2.923  | 1.00 | 0.00 |
| ATOM | 1728 | N1   | LIG | 110 | 17.793  | -17.147 | -4.501  | 1.00 | 0.00 |
| ATOM | 1729 | H1   | LIG | 110 | 16.786  | -17.243 | -4.596  | 1.00 | 0.00 |
| ATOM | 1730 | N2   | LIG | 110 | 19.826  | -17.960 | -3.613  | 1.00 | 0.00 |

|      |      |     |     |     |        |         |        |      |      |
|------|------|-----|-----|-----|--------|---------|--------|------|------|
| ATOM | 1731 | N3  | LIG | 110 | 22.573 | -14.285 | -8.362 | 1.00 | 0.00 |
| ATOM | 1732 | H10 | LIG | 110 | 22.376 | -13.880 | -9.262 | 1.00 | 0.00 |
| ATOM | 1733 | H11 | LIG | 110 | 23.531 | -14.496 | -8.142 | 1.00 | 0.00 |
| ATOM | 1734 | C1  | LIG | 110 | 19.535 | -15.046 | -5.637 | 1.00 | 0.00 |
| ATOM | 1735 | C2  | LIG | 110 | 19.201 | -14.487 | -6.869 | 1.00 | 0.00 |
| ATOM | 1736 | H2  | LIG | 110 | 18.167 | -14.249 | -7.094 | 1.00 | 0.00 |
| ATOM | 1737 | C3  | LIG | 110 | 20.845 | -15.361 | -5.278 | 1.00 | 0.00 |
| ATOM | 1738 | H3  | LIG | 110 | 21.062 | -15.819 | -4.321 | 1.00 | 0.00 |
| ATOM | 1739 | C4  | LIG | 110 | 18.504 | -18.077 | -3.766 | 1.00 | 0.00 |
| ATOM | 1740 | C5  | LIG | 110 | 21.565 | -14.537 | -7.460 | 1.00 | 0.00 |
| ATOM | 1741 | C6  | LIG | 110 | 20.220 | -14.231 | -7.781 | 1.00 | 0.00 |
| ATOM | 1742 | H4  | LIG | 110 | 19.983 | -13.792 | -8.744 | 1.00 | 0.00 |
| ATOM | 1743 | C7  | LIG | 110 | 21.858 | -15.106 | -6.196 | 1.00 | 0.00 |
| ATOM | 1744 | H5  | LIG | 110 | 22.885 | -15.349 | -5.943 | 1.00 | 0.00 |
| ATOM | 1745 | C8  | LIG | 110 | 17.973 | -19.250 | -3.126 | 1.00 | 0.00 |
| ATOM | 1746 | H6  | LIG | 110 | 16.943 | -19.565 | -3.103 | 1.00 | 0.00 |
| ATOM | 1747 | C9  | LIG | 110 | 19.049 | -19.863 | -2.553 | 1.00 | 0.00 |
| ATOM | 1748 | C10 | LIG | 110 | 19.220 | -21.098 | -1.743 | 1.00 | 0.00 |
| ATOM | 1749 | H7  | LIG | 110 | 18.257 | -21.597 | -1.602 | 1.00 | 0.00 |
| ATOM | 1750 | H8  | LIG | 110 | 19.906 | -21.796 | -2.235 | 1.00 | 0.00 |
| ATOM | 1751 | H9  | LIG | 110 | 19.639 | -20.863 | -0.759 | 1.00 | 0.00 |

TER



|      |      |     |     |     |        |         |        |      |      |
|------|------|-----|-----|-----|--------|---------|--------|------|------|
| ATOM | 1752 | S1  | LIG | 111 | 18.119 | -14.532 | 16.073 | 1.00 | 0.00 |
| ATOM | 1753 | O1  | LIG | 111 | 15.184 | -12.219 | 13.398 | 1.00 | 0.00 |
| ATOM | 1754 | O2  | LIG | 111 | 18.685 | -16.026 | 16.432 | 1.00 | 0.00 |
| ATOM | 1755 | O3  | LIG | 111 | 19.049 | -13.461 | 15.271 | 1.00 | 0.00 |
| ATOM | 1756 | N1  | LIG | 111 | 16.655 | -14.994 | 15.024 | 1.00 | 0.00 |
| ATOM | 1757 | H1  | LIG | 111 | 16.795 | -15.955 | 14.725 | 1.00 | 0.00 |
| ATOM | 1758 | N2  | LIG | 111 | 15.865 | -12.820 | 14.541 | 1.00 | 0.00 |
| ATOM | 1759 | N3  | LIG | 111 | 15.960 | -12.074 | 21.102 | 1.00 | 0.00 |
| ATOM | 1760 | H10 | LIG | 111 | 15.922 | -12.601 | 21.957 | 1.00 | 0.00 |
| ATOM | 1761 | H11 | LIG | 111 | 15.636 | -11.122 | 21.122 | 1.00 | 0.00 |
| ATOM | 1762 | C1  | LIG | 111 | 17.419 | -13.764 | 17.601 | 1.00 | 0.00 |
| ATOM | 1763 | C2  | LIG | 111 | 17.388 | -14.544 | 18.756 | 1.00 | 0.00 |
| ATOM | 1764 | H2  | LIG | 111 | 17.750 | -15.565 | 18.730 | 1.00 | 0.00 |
| ATOM | 1765 | C3  | LIG | 111 | 16.983 | -12.440 | 17.570 | 1.00 | 0.00 |
| ATOM | 1766 | H3  | LIG | 111 | 16.998 | -11.874 | 16.646 | 1.00 | 0.00 |
| ATOM | 1767 | C4  | LIG | 111 | 16.040 | -14.093 | 14.175 | 1.00 | 0.00 |
| ATOM | 1768 | C5  | LIG | 111 | 16.443 | -12.636 | 19.942 | 1.00 | 0.00 |
| ATOM | 1769 | C6  | LIG | 111 | 16.899 | -13.976 | 19.928 | 1.00 | 0.00 |
| ATOM | 1770 | H4  | LIG | 111 | 16.870 | -14.564 | 20.840 | 1.00 | 0.00 |
| ATOM | 1771 | C7  | LIG | 111 | 16.492 | -11.880 | 18.745 | 1.00 | 0.00 |
| ATOM | 1772 | H5  | LIG | 111 | 16.140 | -10.854 | 18.743 | 1.00 | 0.00 |
| ATOM | 1773 | C8  | LIG | 111 | 15.501 | -14.375 | 12.873 | 1.00 | 0.00 |

|      |      |     |     |     |        |         |        |      |      |
|------|------|-----|-----|-----|--------|---------|--------|------|------|
| ATOM | 1774 | H6  | LIG | 111 | 15.518 | -15.320 | 12.355 | 1.00 | 0.00 |
| ATOM | 1775 | C9  | LIG | 111 | 14.978 | -13.193 | 12.438 | 1.00 | 0.00 |
| ATOM | 1776 | C10 | LIG | 111 | 14.284 | -12.770 | 11.193 | 1.00 | 0.00 |
| ATOM | 1777 | H7  | LIG | 111 | 14.185 | -13.614 | 10.506 | 1.00 | 0.00 |
| ATOM | 1778 | H8  | LIG | 111 | 13.284 | -12.382 | 11.416 | 1.00 | 0.00 |
| ATOM | 1779 | H9  | LIG | 111 | 14.841 | -11.972 | 10.689 | 1.00 | 0.00 |
| TER  |      |     |     |     |        |         |        |      |      |
| ATOM | 1780 | S1  | LIG | 112 | -6.616 | -7.351  | 15.094 | 1.00 | 0.00 |
| ATOM | 1781 | O1  | LIG | 112 | -6.079 | -11.771 | 16.233 | 1.00 | 0.00 |
| ATOM | 1782 | O2  | LIG | 112 | -6.677 | -6.308  | 13.833 | 1.00 | 0.00 |
| ATOM | 1783 | O3  | LIG | 112 | -7.964 | -7.729  | 15.926 | 1.00 | 0.00 |
| ATOM | 1784 | N1  | LIG | 112 | -5.978 | -8.864  | 14.221 | 1.00 | 0.00 |
| ATOM | 1785 | H1  | LIG | 112 | -6.141 | -8.725  | 13.227 | 1.00 | 0.00 |
| ATOM | 1786 | N2  | LIG | 112 | -5.894 | -10.332 | 16.071 | 1.00 | 0.00 |
| ATOM | 1787 | N3  | LIG | 112 | -2.289 | -5.539  | 18.833 | 1.00 | 0.00 |
| ATOM | 1788 | H10 | LIG | 112 | -1.698 | -4.759  | 18.599 | 1.00 | 0.00 |
| ATOM | 1789 | H11 | LIG | 112 | -2.137 | -5.993  | 19.717 | 1.00 | 0.00 |
| ATOM | 1790 | C1  | LIG | 112 | -5.268 | -6.833  | 16.247 | 1.00 | 0.00 |
| ATOM | 1791 | C2  | LIG | 112 | -4.479 | -5.748  | 15.866 | 1.00 | 0.00 |
| ATOM | 1792 | H2  | LIG | 112 | -4.657 | -5.255  | 14.918 | 1.00 | 0.00 |
| ATOM | 1793 | C3  | LIG | 112 | -5.102 | -7.502  | 17.459 | 1.00 | 0.00 |
| ATOM | 1794 | H3  | LIG | 112 | -5.717 | -8.357  | 17.708 | 1.00 | 0.00 |

|      |      |     |     |     |        |         |         |      |      |
|------|------|-----|-----|-----|--------|---------|---------|------|------|
| ATOM | 1795 | C4  | LIG | 112 | -6.085 | -10.131 | 14.763  | 1.00 | 0.00 |
| ATOM | 1796 | C5  | LIG | 112 | -3.276 | -5.967  | 17.975  | 1.00 | 0.00 |
| ATOM | 1797 | C6  | LIG | 112 | -3.481 | -5.315  | 16.734  | 1.00 | 0.00 |
| ATOM | 1798 | H4  | LIG | 112 | -2.858 | -4.471  | 16.461  | 1.00 | 0.00 |
| ATOM | 1799 | C7  | LIG | 112 | -4.100 | -7.066  | 18.320  | 1.00 | 0.00 |
| ATOM | 1800 | H5  | LIG | 112 | -3.947 | -7.575  | 19.266  | 1.00 | 0.00 |
| ATOM | 1801 | C8  | LIG | 112 | -6.363 | -11.347 | 14.050  | 1.00 | 0.00 |
| ATOM | 1802 | H6  | LIG | 112 | -6.555 | -11.450 | 12.994  | 1.00 | 0.00 |
| ATOM | 1803 | C9  | LIG | 112 | -6.342 | -12.330 | 14.996  | 1.00 | 0.00 |
| ATOM | 1804 | C10 | LIG | 112 | -6.551 | -13.802 | 14.956  | 1.00 | 0.00 |
| ATOM | 1805 | H7  | LIG | 112 | -6.760 | -14.129 | 13.935  | 1.00 | 0.00 |
| ATOM | 1806 | H8  | LIG | 112 | -5.665 | -14.333 | 15.320  | 1.00 | 0.00 |
| ATOM | 1807 | H9  | LIG | 112 | -7.393 | -14.091 | 15.595  | 1.00 | 0.00 |
| TER  |      |     |     |     |        |         |         |      |      |
| ATOM | 1808 | S1  | LIG | 113 | 16.910 | 9.419   | -18.652 | 1.00 | 0.00 |
| ATOM | 1809 | O1  | LIG | 113 | 14.508 | 12.764  | -20.692 | 1.00 | 0.00 |
| ATOM | 1810 | O2  | LIG | 113 | 17.081 | 8.573   | -17.261 | 1.00 | 0.00 |
| ATOM | 1811 | O3  | LIG | 113 | 16.273 | 8.719   | -19.978 | 1.00 | 0.00 |
| ATOM | 1812 | N1  | LIG | 113 | 15.783 | 10.774  | -18.061 | 1.00 | 0.00 |
| ATOM | 1813 | H1  | LIG | 113 | 15.363 | 10.454  | -17.193 | 1.00 | 0.00 |
| ATOM | 1814 | N2  | LIG | 113 | 15.575 | 11.972  | -20.087 | 1.00 | 0.00 |
| ATOM | 1815 | N3  | LIG | 113 | 22.177 | 11.976  | -19.962 | 1.00 | 0.00 |

|      |      |     |     |     |         |        |         |      |      |
|------|------|-----|-----|-----|---------|--------|---------|------|------|
| ATOM | 1816 | H10 | LIG | 113 | 22.955  | 11.906 | -19.329 | 1.00 | 0.00 |
| ATOM | 1817 | H11 | LIG | 113 | 22.316  | 12.477 | -20.823 | 1.00 | 0.00 |
| ATOM | 1818 | C1  | LIG | 113 | 18.513  | 10.244 | -19.063 | 1.00 | 0.00 |
| ATOM | 1819 | C2  | LIG | 113 | 19.554  | 10.115 | -18.145 | 1.00 | 0.00 |
| ATOM | 1820 | H2  | LIG | 113 | 19.402  | 9.563  | -17.225 | 1.00 | 0.00 |
| ATOM | 1821 | C3  | LIG | 113 | 18.647  | 10.927 | -20.271 | 1.00 | 0.00 |
| ATOM | 1822 | H3  | LIG | 113 | 17.807  | 11.028 | -20.946 | 1.00 | 0.00 |
| ATOM | 1823 | C4  | LIG | 113 | 15.048  | 11.557 | -18.931 | 1.00 | 0.00 |
| ATOM | 1824 | C5  | LIG | 113 | 20.963  | 11.402 | -19.663 | 1.00 | 0.00 |
| ATOM | 1825 | C6  | LIG | 113 | 20.782  | 10.696 | -18.448 | 1.00 | 0.00 |
| ATOM | 1826 | H4  | LIG | 113 | 21.608  | 10.605 | -17.751 | 1.00 | 0.00 |
| ATOM | 1827 | C7  | LIG | 113 | 19.876  | 11.508 | -20.565 | 1.00 | 0.00 |
| ATOM | 1828 | H5  | LIG | 113 | 20.003  | 12.051 | -21.496 | 1.00 | 0.00 |
| ATOM | 1829 | C8  | LIG | 113 | 13.710  | 12.041 | -18.725 | 1.00 | 0.00 |
| ATOM | 1830 | H6  | LIG | 113 | 13.073  | 11.845 | -17.878 | 1.00 | 0.00 |
| ATOM | 1831 | C9  | LIG | 113 | 13.424  | 12.785 | -19.833 | 1.00 | 0.00 |
| ATOM | 1832 | C10 | LIG | 113 | 12.233  | 13.557 | -20.275 | 1.00 | 0.00 |
| ATOM | 1833 | H7  | LIG | 113 | 11.440  | 13.495 | -19.526 | 1.00 | 0.00 |
| ATOM | 1834 | H8  | LIG | 113 | 12.486  | 14.611 | -20.431 | 1.00 | 0.00 |
| ATOM | 1835 | H9  | LIG | 113 | 11.849  | 13.167 | -21.224 | 1.00 | 0.00 |
| TER  |      |     |     |     |         |        |         |      |      |
| ATOM | 1836 | S1  | LIG | 114 | -22.208 | 16.359 | 6.968   | 1.00 | 0.00 |

|      |      |     |     |     |         |        |        |      |      |
|------|------|-----|-----|-----|---------|--------|--------|------|------|
| ATOM | 1837 | O1  | LIG | 114 | -22.398 | 16.087 | 11.552 | 1.00 | 0.00 |
| ATOM | 1838 | O2  | LIG | 114 | -21.610 | 15.641 | 5.624  | 1.00 | 0.00 |
| ATOM | 1839 | O3  | LIG | 114 | -23.800 | 16.286 | 7.311  | 1.00 | 0.00 |
| ATOM | 1840 | N1  | LIG | 114 | -21.249 | 15.443 | 8.269  | 1.00 | 0.00 |
| ATOM | 1841 | H1  | LIG | 114 | -20.889 | 14.598 | 7.834  | 1.00 | 0.00 |
| ATOM | 1842 | N2  | LIG | 114 | -22.130 | 16.515 | 10.182 | 1.00 | 0.00 |
| ATOM | 1843 | N3  | LIG | 114 | -20.304 | 22.047 | 7.073  | 1.00 | 0.00 |
| ATOM | 1844 | H10 | LIG | 114 | -19.661 | 22.388 | 6.380  | 1.00 | 0.00 |
| ATOM | 1845 | H11 | LIG | 114 | -20.624 | 22.694 | 7.774  | 1.00 | 0.00 |
| ATOM | 1846 | C1  | LIG | 114 | -21.611 | 18.107 | 7.041  | 1.00 | 0.00 |
| ATOM | 1847 | C2  | LIG | 114 | -20.716 | 18.521 | 6.055  | 1.00 | 0.00 |
| ATOM | 1848 | H2  | LIG | 114 | -20.386 | 17.823 | 5.294  | 1.00 | 0.00 |
| ATOM | 1849 | C3  | LIG | 114 | -22.087 | 18.958 | 8.037  | 1.00 | 0.00 |
| ATOM | 1850 | H3  | LIG | 114 | -22.760 | 18.591 | 8.803  | 1.00 | 0.00 |
| ATOM | 1851 | C4  | LIG | 114 | -21.636 | 15.420 | 9.596  | 1.00 | 0.00 |
| ATOM | 1852 | C5  | LIG | 114 | -20.736 | 20.741 | 7.062  | 1.00 | 0.00 |
| ATOM | 1853 | C6  | LIG | 114 | -20.280 | 19.842 | 6.067  | 1.00 | 0.00 |
| ATOM | 1854 | H4  | LIG | 114 | -19.588 | 20.188 | 5.306  | 1.00 | 0.00 |
| ATOM | 1855 | C7  | LIG | 114 | -21.643 | 20.276 | 8.045  | 1.00 | 0.00 |
| ATOM | 1856 | H5  | LIG | 114 | -21.994 | 20.955 | 8.815  | 1.00 | 0.00 |
| ATOM | 1857 | C8  | LIG | 114 | -21.543 | 14.303 | 10.496 | 1.00 | 0.00 |
| ATOM | 1858 | H6  | LIG | 114 | -21.182 | 13.314 | 10.266 | 1.00 | 0.00 |

|      |      |     |     |     |         |        |        |      |      |
|------|------|-----|-----|-----|---------|--------|--------|------|------|
| ATOM | 1859 | C9  | LIG | 114 | -22.016 | 14.765 | 11.690 | 1.00 | 0.00 |
| ATOM | 1860 | C10 | LIG | 114 | -22.206 | 14.149 | 13.029 | 1.00 | 0.00 |
| ATOM | 1861 | H7  | LIG | 114 | -21.881 | 13.106 | 13.019 | 1.00 | 0.00 |
| ATOM | 1862 | H8  | LIG | 114 | -21.631 | 14.687 | 13.792 | 1.00 | 0.00 |
| ATOM | 1863 | H9  | LIG | 114 | -23.259 | 14.184 | 13.327 | 1.00 | 0.00 |
| TER  |      |     |     |     |         |        |        |      |      |
| ATOM | 1864 | S1  | LIG | 115 | -23.262 | -3.831 | 16.484 | 1.00 | 0.00 |
| ATOM | 1865 | O1  | LIG | 115 | -22.882 | 0.422  | 18.184 | 1.00 | 0.00 |
| ATOM | 1866 | O2  | LIG | 115 | -23.225 | -5.420 | 16.876 | 1.00 | 0.00 |
| ATOM | 1867 | O3  | LIG | 115 | -24.666 | -3.104 | 16.092 | 1.00 | 0.00 |
| ATOM | 1868 | N1  | LIG | 115 | -22.602 | -3.101 | 18.061 | 1.00 | 0.00 |
| ATOM | 1869 | H1  | LIG | 115 | -22.700 | -3.812 | 18.782 | 1.00 | 0.00 |
| ATOM | 1870 | N2  | LIG | 115 | -22.660 | -0.820 | 17.449 | 1.00 | 0.00 |
| ATOM | 1871 | N3  | LIG | 115 | -19.138 | -2.838 | 12.240 | 1.00 | 0.00 |
| ATOM | 1872 | H10 | LIG | 115 | -18.519 | -3.572 | 11.942 | 1.00 | 0.00 |
| ATOM | 1873 | H11 | LIG | 115 | -19.050 | -1.940 | 11.797 | 1.00 | 0.00 |
| ATOM | 1874 | C1  | LIG | 115 | -21.977 | -3.491 | 15.198 | 1.00 | 0.00 |
| ATOM | 1875 | C2  | LIG | 115 | -21.145 | -4.547 | 14.828 | 1.00 | 0.00 |
| ATOM | 1876 | H2  | LIG | 115 | -21.255 | -5.516 | 15.301 | 1.00 | 0.00 |
| ATOM | 1877 | C3  | LIG | 115 | -21.899 | -2.226 | 14.619 | 1.00 | 0.00 |
| ATOM | 1878 | H3  | LIG | 115 | -22.546 | -1.423 | 14.953 | 1.00 | 0.00 |
| ATOM | 1879 | C4  | LIG | 115 | -22.766 | -1.768 | 18.385 | 1.00 | 0.00 |

|      |      |     |     |     |         |         |         |      |      |
|------|------|-----|-----|-----|---------|---------|---------|------|------|
| ATOM | 1880 | C5  | LIG | 115 | -20.079 | -3.055  | 13.222  | 1.00 | 0.00 |
| ATOM | 1881 | C6  | LIG | 115 | -20.195 | -4.326  | 13.836  | 1.00 | 0.00 |
| ATOM | 1882 | H4  | LIG | 115 | -19.540 | -5.134  | 13.528  | 1.00 | 0.00 |
| ATOM | 1883 | C7  | LIG | 115 | -20.944 | -2.012  | 13.631  | 1.00 | 0.00 |
| ATOM | 1884 | H5  | LIG | 115 | -20.859 | -1.033  | 13.170  | 1.00 | 0.00 |
| ATOM | 1885 | C8  | LIG | 115 | -23.024 | -1.230  | 19.693  | 1.00 | 0.00 |
| ATOM | 1886 | H6  | LIG | 115 | -23.152 | -1.785  | 20.608  | 1.00 | 0.00 |
| ATOM | 1887 | C9  | LIG | 115 | -23.079 | 0.122   | 19.520  | 1.00 | 0.00 |
| ATOM | 1888 | C10 | LIG | 115 | -23.315 | 1.269   | 20.436  | 1.00 | 0.00 |
| ATOM | 1889 | H7  | LIG | 115 | -23.467 | 0.914   | 21.458  | 1.00 | 0.00 |
| ATOM | 1890 | H8  | LIG | 115 | -22.463 | 1.957   | 20.428  | 1.00 | 0.00 |
| ATOM | 1891 | H9  | LIG | 115 | -24.199 | 1.837   | 20.128  | 1.00 | 0.00 |
| TER  |      |     |     |     |         |         |         |      |      |
| ATOM | 1892 | S1  | LIG | 116 | -15.105 | -23.794 | -18.853 | 1.00 | 0.00 |
| ATOM | 1893 | O1  | LIG | 116 | -12.427 | -22.127 | -15.510 | 1.00 | 0.00 |
| ATOM | 1894 | O2  | LIG | 116 | -15.531 | -23.609 | -20.423 | 1.00 | 0.00 |
| ATOM | 1895 | O3  | LIG | 116 | -14.195 | -25.062 | -18.382 | 1.00 | 0.00 |
| ATOM | 1896 | N1  | LIG | 116 | -14.155 | -22.217 | -18.595 | 1.00 | 0.00 |
| ATOM | 1897 | H1  | LIG | 116 | -13.911 | -21.863 | -19.516 | 1.00 | 0.00 |
| ATOM | 1898 | N2  | LIG | 116 | -13.573 | -22.520 | -16.325 | 1.00 | 0.00 |
| ATOM | 1899 | N3  | LIG | 116 | -20.063 | -23.417 | -15.496 | 1.00 | 0.00 |
| ATOM | 1900 | H10 | LIG | 116 | -20.951 | -23.193 | -15.911 | 1.00 | 0.00 |

|      |      |     |     |     |         |         |         |      |      |
|------|------|-----|-----|-----|---------|---------|---------|------|------|
| ATOM | 1901 | H11 | LIG | 116 | -20.038 | -23.585 | -14.505 | 1.00 | 0.00 |
| ATOM | 1902 | C1  | LIG | 116 | -16.612 | -23.651 | -17.792 | 1.00 | 0.00 |
| ATOM | 1903 | C2  | LIG | 116 | -17.814 | -23.335 | -18.425 | 1.00 | 0.00 |
| ATOM | 1904 | H2  | LIG | 116 | -17.836 | -23.167 | -19.495 | 1.00 | 0.00 |
| ATOM | 1905 | C3  | LIG | 116 | -16.518 | -23.894 | -16.423 | 1.00 | 0.00 |
| ATOM | 1906 | H3  | LIG | 116 | -15.561 | -24.110 | -15.964 | 1.00 | 0.00 |
| ATOM | 1907 | C4  | LIG | 116 | -13.280 | -22.044 | -17.539 | 1.00 | 0.00 |
| ATOM | 1908 | C5  | LIG | 116 | -18.919 | -23.493 | -16.258 | 1.00 | 0.00 |
| ATOM | 1909 | C6  | LIG | 116 | -18.969 | -23.257 | -17.654 | 1.00 | 0.00 |
| ATOM | 1910 | H4  | LIG | 116 | -19.917 | -23.017 | -18.125 | 1.00 | 0.00 |
| ATOM | 1911 | C7  | LIG | 116 | -17.677 | -23.810 | -15.658 | 1.00 | 0.00 |
| ATOM | 1912 | H5  | LIG | 116 | -17.627 | -23.988 | -14.589 | 1.00 | 0.00 |
| ATOM | 1913 | C8  | LIG | 116 | -12.024 | -21.347 | -17.573 | 1.00 | 0.00 |
| ATOM | 1914 | H6  | LIG | 116 | -11.567 | -20.878 | -18.429 | 1.00 | 0.00 |
| ATOM | 1915 | C9  | LIG | 116 | -11.540 | -21.418 | -16.300 | 1.00 | 0.00 |
| ATOM | 1916 | C10 | LIG | 116 | -10.304 | -20.922 | -15.639 | 1.00 | 0.00 |
| ATOM | 1917 | H7  | LIG | 116 | -9.677  | -20.387 | -16.356 | 1.00 | 0.00 |
| ATOM | 1918 | H8  | LIG | 116 | -10.548 | -20.243 | -14.813 | 1.00 | 0.00 |
| ATOM | 1919 | H9  | LIG | 116 | -9.726  | -21.753 | -15.221 | 1.00 | 0.00 |
| TER  |      |     |     |     |         |         |         |      |      |
| ATOM | 1920 | S1  | LIG | 117 | 18.930  | -1.436  | -6.986  | 1.00 | 0.00 |
| ATOM | 1921 | O1  | LIG | 117 | 23.213  | 0.123   | -6.397  | 1.00 | 0.00 |



|      |      |     |     |     |        |        |        |      |      |
|------|------|-----|-----|-----|--------|--------|--------|------|------|
| ATOM | 1922 | O2  | LIG | 117 | 17.356 | -1.142 | -6.642 | 1.00 | 0.00 |
| ATOM | 1923 | O3  | LIG | 117 | 19.503 | -1.226 | -8.497 | 1.00 | 0.00 |
| ATOM | 1924 | N1  | LIG | 117 | 19.736 | -0.216 | -5.839 | 1.00 | 0.00 |
| ATOM | 1925 | H1  | LIG | 117 | 19.026 | 0.462  | -5.578 | 1.00 | 0.00 |
| ATOM | 1926 | N2  | LIG | 117 | 21.994 | -0.681 | -6.358 | 1.00 | 0.00 |
| ATOM | 1927 | N3  | LIG | 117 | 20.312 | -6.913 | -4.967 | 1.00 | 0.00 |
| ATOM | 1928 | H10 | LIG | 117 | 19.644 | -7.453 | -4.444 | 1.00 | 0.00 |
| ATOM | 1929 | H11 | LIG | 117 | 21.211 | -7.326 | -5.148 | 1.00 | 0.00 |
| ATOM | 1930 | C1  | LIG | 117 | 19.391 | -3.108 | -6.346 | 1.00 | 0.00 |
| ATOM | 1931 | C2  | LIG | 117 | 18.425 | -3.808 | -5.625 | 1.00 | 0.00 |
| ATOM | 1932 | H2  | LIG | 117 | 17.453 | -3.361 | -5.445 | 1.00 | 0.00 |
| ATOM | 1933 | C3  | LIG | 117 | 20.653 | -3.629 | -6.626 | 1.00 | 0.00 |
| ATOM | 1934 | H3  | LIG | 117 | 21.386 | -3.044 | -7.167 | 1.00 | 0.00 |
| ATOM | 1935 | C4  | LIG | 117 | 21.048 | 0.190  | -5.995 | 1.00 | 0.00 |
| ATOM | 1936 | C5  | LIG | 117 | 20.006 | -5.651 | -5.423 | 1.00 | 0.00 |
| ATOM | 1937 | C6  | LIG | 117 | 18.735 | -5.083 | -5.164 | 1.00 | 0.00 |
| ATOM | 1938 | H4  | LIG | 117 | 17.997 | -5.648 | -4.604 | 1.00 | 0.00 |
| ATOM | 1939 | C7  | LIG | 117 | 20.957 | -4.904 | -6.159 | 1.00 | 0.00 |
| ATOM | 1940 | H5  | LIG | 117 | 21.935 | -5.328 | -6.358 | 1.00 | 0.00 |
| ATOM | 1941 | C8  | LIG | 117 | 21.566 | 1.513  | -5.774 | 1.00 | 0.00 |
| ATOM | 1942 | H6  | LIG | 117 | 21.009 | 2.387  | -5.480 | 1.00 | 0.00 |
| ATOM | 1943 | C9  | LIG | 117 | 22.904 | 1.420  | -6.027 | 1.00 | 0.00 |

|      |      |     |     |     |        |        |        |      |      |
|------|------|-----|-----|-----|--------|--------|--------|------|------|
| ATOM | 1944 | C10 | LIG | 117 | 24.027 | 2.393  | -5.998 | 1.00 | 0.00 |
| ATOM | 1945 | H7  | LIG | 117 | 23.667 | 3.382  | -5.703 | 1.00 | 0.00 |
| ATOM | 1946 | H8  | LIG | 117 | 24.801 | 2.077  | -5.290 | 1.00 | 0.00 |
| ATOM | 1947 | H9  | LIG | 117 | 24.498 | 2.473  | -6.984 | 1.00 | 0.00 |
| TER  |      |     |     |     |        |        |        |      |      |
| ATOM | 1948 | S1  | LIG | 118 | -4.296 | 14.715 | 15.888 | 1.00 | 0.00 |
| ATOM | 1949 | O1  | LIG | 118 | -2.133 | 18.713 | 15.209 | 1.00 | 0.00 |
| ATOM | 1950 | O2  | LIG | 118 | -4.174 | 13.094 | 15.686 | 1.00 | 0.00 |
| ATOM | 1951 | O3  | LIG | 118 | -4.182 | 15.378 | 17.371 | 1.00 | 0.00 |
| ATOM | 1952 | N1  | LIG | 118 | -2.861 | 15.271 | 14.845 | 1.00 | 0.00 |
| ATOM | 1953 | H1  | LIG | 118 | -2.257 | 14.464 | 14.715 | 1.00 | 0.00 |
| ATOM | 1954 | N2  | LIG | 118 | -3.081 | 17.603 | 15.153 | 1.00 | 0.00 |
| ATOM | 1955 | N3  | LIG | 118 | -9.286 | 16.589 | 13.135 | 1.00 | 0.00 |
| ATOM | 1956 | H10 | LIG | 118 | -9.848 | 15.952 | 12.597 | 1.00 | 0.00 |
| ATOM | 1957 | H11 | LIG | 118 | -9.596 | 17.543 | 13.206 | 1.00 | 0.00 |
| ATOM | 1958 | C1  | LIG | 118 | -5.811 | 15.323 | 15.022 | 1.00 | 0.00 |
| ATOM | 1959 | C2  | LIG | 118 | -6.547 | 14.395 | 14.286 | 1.00 | 0.00 |
| ATOM | 1960 | H2  | LIG | 118 | -6.214 | 13.365 | 14.226 | 1.00 | 0.00 |
| ATOM | 1961 | C3  | LIG | 118 | -6.191 | 16.658 | 15.153 | 1.00 | 0.00 |
| ATOM | 1962 | H3  | LIG | 118 | -5.578 | 17.356 | 15.711 | 1.00 | 0.00 |
| ATOM | 1963 | C4  | LIG | 118 | -2.306 | 16.531 | 14.962 | 1.00 | 0.00 |
| ATOM | 1964 | C5  | LIG | 118 | -8.134 | 16.168 | 13.760 | 1.00 | 0.00 |

|      |      |     |     |     |        |        |        |      |      |
|------|------|-----|-----|-----|--------|--------|--------|------|------|
| ATOM | 1965 | C6  | LIG | 118 | -7.711 | 14.820 | 13.656 | 1.00 | 0.00 |
| ATOM | 1966 | H4  | LIG | 118 | -8.302 | 14.114 | 13.082 | 1.00 | 0.00 |
| ATOM | 1967 | C7  | LIG | 118 | -7.355 | 17.077 | 14.516 | 1.00 | 0.00 |
| ATOM | 1968 | H5  | LIG | 118 | -7.667 | 18.113 | 14.597 | 1.00 | 0.00 |
| ATOM | 1969 | C8  | LIG | 118 | -0.911 | 16.864 | 14.868 | 1.00 | 0.00 |
| ATOM | 1970 | H6  | LIG | 118 | -0.090 | 16.182 | 14.719 | 1.00 | 0.00 |
| ATOM | 1971 | C9  | LIG | 118 | -0.856 | 18.219 | 15.019 | 1.00 | 0.00 |
| ATOM | 1972 | C10 | LIG | 118 | 0.254  | 19.209 | 15.033 | 1.00 | 0.00 |
| ATOM | 1973 | H7  | LIG | 118 | 1.213  | 18.708 | 14.884 | 1.00 | 0.00 |
| ATOM | 1974 | H8  | LIG | 118 | 0.122  | 19.956 | 14.242 | 1.00 | 0.00 |
| ATOM | 1975 | H9  | LIG | 118 | 0.284  | 19.744 | 15.989 | 1.00 | 0.00 |
| TER  |      |     |     |     |        |        |        |      |      |
| ATOM | 1976 | S1  | LIG | 119 | 12.456 | 21.961 | 2.985  | 1.00 | 0.00 |
| ATOM | 1977 | O1  | LIG | 119 | 11.838 | 23.395 | 7.308  | 1.00 | 0.00 |
| ATOM | 1978 | O2  | LIG | 119 | 11.738 | 21.188 | 1.733  | 1.00 | 0.00 |
| ATOM | 1979 | O3  | LIG | 119 | 12.721 | 23.568 | 2.929  | 1.00 | 0.00 |
| ATOM | 1980 | N1  | LIG | 119 | 11.234 | 21.579 | 4.333  | 1.00 | 0.00 |
| ATOM | 1981 | H1  | LIG | 119 | 10.369 | 21.296 | 3.880  | 1.00 | 0.00 |
| ATOM | 1982 | N2  | LIG | 119 | 12.310 | 22.698 | 6.115  | 1.00 | 0.00 |
| ATOM | 1983 | N3  | LIG | 119 | 17.523 | 19.051 | 4.344  | 1.00 | 0.00 |
| ATOM | 1984 | H10 | LIG | 119 | 17.765 | 18.194 | 3.878  | 1.00 | 0.00 |
| ATOM | 1985 | H11 | LIG | 119 | 18.162 | 19.407 | 5.034  | 1.00 | 0.00 |

|      |      |     |     |     |        |        |       |      |      |
|------|------|-----|-----|-----|--------|--------|-------|------|------|
| ATOM | 1986 | C1  | LIG | 119 | 14.006 | 21.066 | 3.445 | 1.00 | 0.00 |
| ATOM | 1987 | C2  | LIG | 119 | 14.287 | 19.881 | 2.767 | 1.00 | 0.00 |
| ATOM | 1988 | H2  | LIG | 119 | 13.601 | 19.510 | 2.015 | 1.00 | 0.00 |
| ATOM | 1989 | C3  | LIG | 119 | 14.853 | 21.606 | 4.411 | 1.00 | 0.00 |
| ATOM | 1990 | H3  | LIG | 119 | 14.587 | 22.515 | 4.936 | 1.00 | 0.00 |
| ATOM | 1991 | C4  | LIG | 119 | 11.186 | 22.297 | 5.513 | 1.00 | 0.00 |
| ATOM | 1992 | C5  | LIG | 119 | 16.356 | 19.718 | 4.046 | 1.00 | 0.00 |
| ATOM | 1993 | C6  | LIG | 119 | 15.467 | 19.207 | 3.069 | 1.00 | 0.00 |
| ATOM | 1994 | H4  | LIG | 119 | 15.709 | 18.285 | 2.551 | 1.00 | 0.00 |
| ATOM | 1995 | C7  | LIG | 119 | 16.029 | 20.925 | 4.711 | 1.00 | 0.00 |
| ATOM | 1996 | H5  | LIG | 119 | 16.701 | 21.321 | 5.464 | 1.00 | 0.00 |
| ATOM | 1997 | C8  | LIG | 119 | 10.004 | 22.668 | 6.242 | 1.00 | 0.00 |
| ATOM | 1998 | H6  | LIG | 119 | 8.982  | 22.466 | 5.966 | 1.00 | 0.00 |
| ATOM | 1999 | C9  | LIG | 119 | 10.456 | 23.335 | 7.343 | 1.00 | 0.00 |
| ATOM | 2000 | C10 | LIG | 119 | 9.787  | 23.988 | 8.499 | 1.00 | 0.00 |
| ATOM | 2001 | H7  | LIG | 119 | 8.702  | 23.888 | 8.417 | 1.00 | 0.00 |
| ATOM | 2002 | H8  | LIG | 119 | 10.110 | 23.537 | 9.444 | 1.00 | 0.00 |
| ATOM | 2003 | H9  | LIG | 119 | 10.037 | 25.054 | 8.541 | 1.00 | 0.00 |
| TER  |      |     |     |     |        |        |       |      |      |
| END  |      |     |     |     |        |        |       |      |      |

**Table M:** The number of atoms present in the system of HA-Dic

|      |    |     |     |   |       |        |        |      |      |
|------|----|-----|-----|---|-------|--------|--------|------|------|
| ATOM | 1  | N   | PRO | 1 | 5.137 | -6.696 | 13.483 | 1.00 | 0.00 |
| ATOM | 2  | H2  | PRO | 1 | 5.624 | -5.814 | 13.557 | 1.00 | 0.00 |
| ATOM | 3  | H3  | PRO | 1 | 5.589 | -7.548 | 13.781 | 1.00 | 0.00 |
| ATOM | 4  | CD  | PRO | 1 | 3.871 | -6.651 | 14.277 | 1.00 | 0.00 |
| ATOM | 5  | HD2 | PRO | 1 | 3.805 | -5.635 | 14.668 | 1.00 | 0.00 |
| ATOM | 6  | HD3 | PRO | 1 | 4.016 | -7.348 | 15.101 | 1.00 | 0.00 |
| ATOM | 7  | CG  | PRO | 1 | 2.667 | -7.024 | 13.399 | 1.00 | 0.00 |
| ATOM | 8  | HG2 | PRO | 1 | 1.965 | -6.190 | 13.374 | 1.00 | 0.00 |
| ATOM | 9  | HG3 | PRO | 1 | 2.173 | -7.901 | 13.816 | 1.00 | 0.00 |
| ATOM | 10 | CB  | PRO | 1 | 3.227 | -7.322 | 12.012 | 1.00 | 0.00 |
| ATOM | 11 | HB2 | PRO | 1 | 2.676 | -6.854 | 11.196 | 1.00 | 0.00 |
| ATOM | 12 | HB3 | PRO | 1 | 3.247 | -8.401 | 11.864 | 1.00 | 0.00 |
| ATOM | 13 | CA  | PRO | 1 | 4.666 | -6.770 | 12.056 | 1.00 | 0.00 |
| ATOM | 14 | HA  | PRO | 1 | 5.259 | -7.530 | 11.548 | 1.00 | 0.00 |
| ATOM | 15 | C   | PRO | 1 | 4.806 | -5.429 | 11.311 | 1.00 | 0.00 |
| ATOM | 16 | O   | PRO | 1 | 3.834 | -4.824 | 10.860 | 1.00 | 0.00 |
| ATOM | 17 | N   | TYR | 2 | 6.050 | -4.994 | 11.172 | 1.00 | 0.00 |
| ATOM | 18 | H   | TYR | 2 | 6.812 | -5.544 | 11.541 | 1.00 | 0.00 |
| ATOM | 19 | CA  | TYR | 2 | 6.364 | -3.742 | 10.506 | 1.00 | 0.00 |
| ATOM | 20 | HA  | TYR | 2 | 5.488 | -3.097 | 10.443 | 1.00 | 0.00 |
| ATOM | 21 | CB  | TYR | 2 | 7.435 | -3.033 | 11.338 | 1.00 | 0.00 |

|      |    |         |   |        |        |        |      |      |
|------|----|---------|---|--------|--------|--------|------|------|
| ATOM | 22 | HB2 TYR | 2 | 7.768  | -2.139 | 10.809 | 1.00 | 0.00 |
| ATOM | 23 | HB3 TYR | 2 | 6.941  | -2.743 | 12.265 | 1.00 | 0.00 |
| ATOM | 24 | CG TYR  | 2 | 8.638  | -3.911 | 11.657 | 1.00 | 0.00 |
| ATOM | 25 | CD1 TYR | 2 | 8.625  | -4.737 | 12.801 | 1.00 | 0.00 |
| ATOM | 26 | HD1 TYR | 2 | 7.759  | -4.734 | 13.462 | 1.00 | 0.00 |
| ATOM | 27 | CE1 TYR | 2 | 9.728  | -5.564 | 13.089 | 1.00 | 0.00 |
| ATOM | 28 | HE1 TYR | 2 | 9.744  | -6.154 | 14.005 | 1.00 | 0.00 |
| ATOM | 29 | CZ TYR  | 2 | 10.851 | -5.552 | 12.239 | 1.00 | 0.00 |
| ATOM | 30 | OH TYR  | 2 | 11.908 | -6.372 | 12.473 | 1.00 | 0.00 |
| ATOM | 31 | HH TYR  | 2 | 11.789 | -6.924 | 13.248 | 1.00 | 0.00 |
| ATOM | 32 | CE2 TYR | 2 | 10.843 | -4.756 | 11.084 | 1.00 | 0.00 |
| ATOM | 33 | HE2 TYR | 2 | 11.704 | -4.777 | 10.415 | 1.00 | 0.00 |
| ATOM | 34 | CD2 TYR | 2 | 9.741  | -3.936 | 10.785 | 1.00 | 0.00 |
| ATOM | 35 | HD2 TYR | 2 | 9.745  | -3.325 | 9.882  | 1.00 | 0.00 |
| ATOM | 36 | C TYR   | 2 | 6.883  | -3.984 | 9.097  | 1.00 | 0.00 |
| ATOM | 37 | O TYR   | 2 | 6.674  | -3.135 | 8.248  | 1.00 | 0.00 |
| ATOM | 38 | N GLY   | 3 | 7.470  | -5.167 | 8.862  | 1.00 | 0.00 |
| ATOM | 39 | H GLY   | 3 | 7.510  | -5.840 | 9.613  | 1.00 | 0.00 |
| ATOM | 40 | CA GLY  | 3 | 8.048  | -5.527 | 7.588  | 1.00 | 0.00 |
| ATOM | 41 | HA2 GLY | 3 | 8.387  | -6.562 | 7.629  | 1.00 | 0.00 |
| ATOM | 42 | HA3 GLY | 3 | 7.291  | -5.423 | 6.810  | 1.00 | 0.00 |
| ATOM | 43 | C GLY   | 3 | 9.234  | -4.630 | 7.249  | 1.00 | 0.00 |

|      |    |      |     |   |        |        |       |      |      |
|------|----|------|-----|---|--------|--------|-------|------|------|
| ATOM | 44 | O    | GLY | 3 | 9.183  | -3.405 | 7.253 | 1.00 | 0.00 |
| ATOM | 45 | N    | ARG | 4 | 10.374 | -5.258 | 6.999 | 1.00 | 0.00 |
| ATOM | 46 | H    | ARG | 4 | 10.446 | -6.253 | 7.151 | 1.00 | 0.00 |
| ATOM | 47 | CA   | ARG | 4 | 11.573 | -4.532 | 6.592 | 1.00 | 0.00 |
| ATOM | 48 | HA   | ARG | 4 | 11.402 | -3.456 | 6.646 | 1.00 | 0.00 |
| ATOM | 49 | CB   | ARG | 4 | 12.729 | -4.892 | 7.531 | 1.00 | 0.00 |
| ATOM | 50 | HB2  | ARG | 4 | 12.340 | -4.993 | 8.544 | 1.00 | 0.00 |
| ATOM | 51 | HB3  | ARG | 4 | 13.160 | -5.840 | 7.210 | 1.00 | 0.00 |
| ATOM | 52 | CG   | ARG | 4 | 13.813 | -3.804 | 7.506 | 1.00 | 0.00 |
| ATOM | 53 | HG2  | ARG | 4 | 13.653 | -3.166 | 6.636 | 1.00 | 0.00 |
| ATOM | 54 | HG3  | ARG | 4 | 13.733 | -3.206 | 8.413 | 1.00 | 0.00 |
| ATOM | 55 | CD   | ARG | 4 | 15.207 | -4.430 | 7.429 | 1.00 | 0.00 |
| ATOM | 56 | HD2  | ARG | 4 | 15.364 | -5.074 | 8.293 | 1.00 | 0.00 |
| ATOM | 57 | HD3  | ARG | 4 | 15.290 | -5.020 | 6.516 | 1.00 | 0.00 |
| ATOM | 58 | NE   | ARG | 4 | 16.251 | -3.395 | 7.417 | 1.00 | 0.00 |
| ATOM | 59 | HE   | ARG | 4 | 15.934 | -2.447 | 7.271 | 1.00 | 0.00 |
| ATOM | 60 | CZ   | ARG | 4 | 17.544 | -3.610 | 7.565 | 1.00 | 0.00 |
| ATOM | 61 | NH1  | ARG | 4 | 18.000 | -4.821 | 7.757 | 1.00 | 0.00 |
| ATOM | 62 | HH11 | ARG | 4 | 17.358 | -5.599 | 7.792 | 1.00 | 0.00 |
| ATOM | 63 | HH12 | ARG | 4 | 18.993 | -4.971 | 7.868 | 1.00 | 0.00 |
| ATOM | 64 | NH2  | ARG | 4 | 18.392 | -2.618 | 7.537 | 1.00 | 0.00 |
| ATOM | 65 | HH21 | ARG | 4 | 18.057 | -1.675 | 7.400 | 1.00 | 0.00 |

|      |    |      |     |   |        |         |       |      |      |
|------|----|------|-----|---|--------|---------|-------|------|------|
| ATOM | 66 | HH22 | ARG | 4 | 19.379 | -2.798  | 7.651 | 1.00 | 0.00 |
| ATOM | 67 | C    | ARG | 4 | 11.929 | -4.797  | 5.131 | 1.00 | 0.00 |
| ATOM | 68 | O    | ARG | 4 | 13.013 | -4.428  | 4.700 | 1.00 | 0.00 |
| ATOM | 69 | N    | GLY | 5 | 11.088 | -5.573  | 4.444 | 1.00 | 0.00 |
| ATOM | 70 | H    | GLY | 5 | 10.248 | -5.911  | 4.891 | 1.00 | 0.00 |
| ATOM | 71 | CA   | GLY | 5 | 11.333 | -5.951  | 3.074 | 1.00 | 0.00 |
| ATOM | 72 | HA2  | GLY | 5 | 10.507 | -6.564  | 2.713 | 1.00 | 0.00 |
| ATOM | 73 | HA3  | GLY | 5 | 11.414 | -5.054  | 2.459 | 1.00 | 0.00 |
| ATOM | 74 | C    | GLY | 5 | 12.619 | -6.742  | 2.963 | 1.00 | 0.00 |
| ATOM | 75 | O    | GLY | 5 | 13.363 | -6.558  | 2.015 | 1.00 | 0.00 |
| ATOM | 76 | N    | ARG | 6 | 12.905 | -7.585  | 3.963 | 1.00 | 0.00 |
| ATOM | 77 | H    | ARG | 6 | 12.293 | -7.599  | 4.766 | 1.00 | 0.00 |
| ATOM | 78 | CA   | ARG | 6 | 14.097 | -8.425  | 3.986 | 1.00 | 0.00 |
| ATOM | 79 | HA   | ARG | 6 | 14.958 | -7.849  | 3.647 | 1.00 | 0.00 |
| ATOM | 80 | CB   | ARG | 6 | 14.375 | -8.933  | 5.403 | 1.00 | 0.00 |
| ATOM | 81 | HB2  | ARG | 6 | 15.139 | -9.708  | 5.350 | 1.00 | 0.00 |
| ATOM | 82 | HB3  | ARG | 6 | 14.743 | -8.101  | 6.004 | 1.00 | 0.00 |
| ATOM | 83 | CG   | ARG | 6 | 13.101 | -9.511  | 6.050 | 1.00 | 0.00 |
| ATOM | 84 | HG2  | ARG | 6 | 12.651 | -8.744  | 6.681 | 1.00 | 0.00 |
| ATOM | 85 | HG3  | ARG | 6 | 12.402 | -9.786  | 5.260 | 1.00 | 0.00 |
| ATOM | 86 | CD   | ARG | 6 | 13.425 | -10.742 | 6.896 | 1.00 | 0.00 |
| ATOM | 87 | HD2  | ARG | 6 | 14.503 | -10.806 | 7.045 | 1.00 | 0.00 |



|      |     |          |   |        |         |        |      |      |
|------|-----|----------|---|--------|---------|--------|------|------|
| ATOM | 88  | HD3 ARG  | 6 | 12.929 | -10.658 | 7.863  | 1.00 | 0.00 |
| ATOM | 89  | NE ARG   | 6 | 12.966 | -11.975 | 6.236  | 1.00 | 0.00 |
| ATOM | 90  | HE ARG   | 6 | 12.714 | -11.890 | 5.261  | 1.00 | 0.00 |
| ATOM | 91  | CZ ARG   | 6 | 12.884 | -13.162 | 6.807  | 1.00 | 0.00 |
| ATOM | 92  | NH1 ARG  | 6 | 13.199 | -13.317 | 8.069  | 1.00 | 0.00 |
| ATOM | 93  | HH11 ARG | 6 | 13.507 | -12.522 | 8.610  | 1.00 | 0.00 |
| ATOM | 94  | HH12 ARG | 6 | 13.132 | -14.230 | 8.494  | 1.00 | 0.00 |
| ATOM | 95  | NH2 ARG  | 6 | 12.465 | -14.194 | 6.129  | 1.00 | 0.00 |
| ATOM | 96  | HH21 ARG | 6 | 12.201 | -14.084 | 5.160  | 1.00 | 0.00 |
| ATOM | 97  | HH22 ARG | 6 | 12.406 | -15.097 | 6.575  | 1.00 | 0.00 |
| ATOM | 98  | C ARG    | 6 | 13.996 | -9.592  | 3.017  | 1.00 | 0.00 |
| ATOM | 99  | O ARG    | 6 | 14.140 | -10.734 | 3.451  | 1.00 | 0.00 |
| ATOM | 100 | N THR    | 7 | 13.658 | -9.324  | 1.772  | 1.00 | 0.00 |
| ATOM | 101 | H THR    | 7 | 13.525 | -8.355  | 1.518  | 1.00 | 0.00 |
| ATOM | 102 | CA THR   | 7 | 13.403 | -10.338 | 0.770  | 1.00 | 0.00 |
| ATOM | 103 | HA THR   | 7 | 14.067 | -11.181 | 0.962  | 1.00 | 0.00 |
| ATOM | 104 | CB THR   | 7 | 11.944 | -10.820 | 0.897  | 1.00 | 0.00 |
| ATOM | 105 | HB THR   | 7 | 11.677 | -11.361 | -0.011 | 1.00 | 0.00 |
| ATOM | 106 | CG2 THR  | 7 | 11.763 | -11.740 | 2.113  | 1.00 | 0.00 |
| ATOM | 107 | HG21 THR | 7 | 12.029 | -11.199 | 3.021  | 1.00 | 0.00 |
| ATOM | 108 | HG22 THR | 7 | 10.724 | -12.062 | 2.173  | 1.00 | 0.00 |
| ATOM | 109 | HG23 THR | 7 | 12.408 | -12.612 | 2.008  | 1.00 | 0.00 |

|      |     |         |   |        |         |        |      |      |
|------|-----|---------|---|--------|---------|--------|------|------|
| ATOM | 110 | OG1 THR | 7 | 11.071 | -9.721  | 1.112  | 1.00 | 0.00 |
| ATOM | 111 | HG1 THR | 7 | 10.169 | -10.039 | 1.188  | 1.00 | 0.00 |
| ATOM | 112 | C THR   | 7 | 13.702 | -9.782  | -0.607 | 1.00 | 0.00 |
| ATOM | 113 | O THR   | 7 | 14.168 | -8.654  | -0.726 | 1.00 | 0.00 |
| ATOM | 114 | N GLU   | 8 | 13.459 | -10.586 | -1.632 | 1.00 | 0.00 |
| ATOM | 115 | H GLU   | 8 | 13.163 | -11.535 | -1.459 | 1.00 | 0.00 |
| ATOM | 116 | CA GLU  | 8 | 13.681 | -10.173 | -3.011 | 1.00 | 0.00 |
| ATOM | 117 | HA GLU  | 8 | 14.267 | -9.254  | -3.041 | 1.00 | 0.00 |
| ATOM | 118 | CB GLU  | 8 | 14.452 | -11.270 | -3.756 | 1.00 | 0.00 |
| ATOM | 119 | HB2 GLU | 8 | 13.997 | -12.235 | -3.534 | 1.00 | 0.00 |
| ATOM | 120 | HB3 GLU | 8 | 14.392 | -11.079 | -4.828 | 1.00 | 0.00 |
| ATOM | 121 | CG GLU  | 8 | 15.921 | -11.286 | -3.322 | 1.00 | 0.00 |
| ATOM | 122 | HG2 GLU | 8 | 16.049 | -10.738 | -2.389 | 1.00 | 0.00 |
| ATOM | 123 | HG3 GLU | 8 | 16.196 | -12.330 | -3.171 | 1.00 | 0.00 |
| ATOM | 124 | CD GLU  | 8 | 16.818 | -10.674 | -4.399 | 1.00 | 0.00 |
| ATOM | 125 | OE1 GLU | 8 | 17.124 | -11.405 | -5.368 | 1.00 | 0.00 |
| ATOM | 126 | OE2 GLU | 8 | 17.150 | -9.476  | -4.263 | 1.00 | 0.00 |
| ATOM | 127 | C GLU   | 8 | 12.359 | -9.844  | -3.703 | 1.00 | 0.00 |
| ATOM | 128 | O GLU   | 8 | 11.280 | -9.842  | -3.091 | 1.00 | 0.00 |
| ATOM | 129 | N SER   | 9 | 12.449 | -9.526  | -4.990 | 1.00 | 0.00 |
| ATOM | 130 | H SER   | 9 | 13.364 | -9.411  | -5.402 | 1.00 | 0.00 |
| ATOM | 131 | CA SER  | 9 | 11.286 | -9.257  | -5.814 | 1.00 | 0.00 |

|      |     |     |     |    |        |         |        |      |      |
|------|-----|-----|-----|----|--------|---------|--------|------|------|
| ATOM | 132 | HA  | SER | 9  | 10.664 | -8.506  | -5.327 | 1.00 | 0.00 |
| ATOM | 133 | CB  | SER | 9  | 11.690 | -8.734  | -7.201 | 1.00 | 0.00 |
| ATOM | 134 | HB2 | SER | 9  | 11.079 | -9.245  | -7.945 | 1.00 | 0.00 |
| ATOM | 135 | HB3 | SER | 9  | 11.481 | -7.664  | -7.232 | 1.00 | 0.00 |
| ATOM | 136 | OG  | SER | 9  | 13.057 | -8.954  | -7.484 | 1.00 | 0.00 |
| ATOM | 137 | HG  | SER | 9  | 13.262 | -8.612  | -8.358 | 1.00 | 0.00 |
| ATOM | 138 | C   | SER | 9  | 10.392 | -10.495 | -5.953 | 1.00 | 0.00 |
| ATOM | 139 | O   | SER | 9  | 10.744 | -11.614 | -5.584 | 1.00 | 0.00 |
| ATOM | 140 | N   | GLY | 10 | 9.198  | -10.302 | -6.510 | 1.00 | 0.00 |
| ATOM | 141 | H   | GLY | 10 | 8.910  | -9.372  | -6.782 | 1.00 | 0.00 |
| ATOM | 142 | CA  | GLY | 10 | 8.276  | -11.408 | -6.745 | 1.00 | 0.00 |
| ATOM | 143 | HA2 | GLY | 10 | 8.409  | -11.772 | -7.764 | 1.00 | 0.00 |
| ATOM | 144 | HA3 | GLY | 10 | 8.496  | -12.210 | -6.041 | 1.00 | 0.00 |
| ATOM | 145 | C   | GLY | 10 | 6.848  | -10.975 | -6.563 | 1.00 | 0.00 |
| ATOM | 146 | O   | GLY | 10 | 6.258  | -10.409 | -7.473 | 1.00 | 0.00 |
| ATOM | 147 | N   | CYX | 11 | 6.343  | -11.078 | -5.333 | 1.00 | 0.00 |
| ATOM | 148 | H   | CYX | 11 | 6.870  | -11.544 | -4.608 | 1.00 | 0.00 |
| ATOM | 149 | CA  | CYX | 11 | 5.018  | -10.605 | -5.019 | 1.00 | 0.00 |
| ATOM | 150 | HA  | CYX | 11 | 4.300  | -11.014 | -5.730 | 1.00 | 0.00 |
| ATOM | 151 | CB  | CYX | 11 | 4.620  | -11.042 | -3.619 | 1.00 | 0.00 |
| ATOM | 152 | HB2 | CYX | 11 | 5.238  | -10.522 | -2.887 | 1.00 | 0.00 |
| ATOM | 153 | HB3 | CYX | 11 | 3.571  | -10.800 | -3.447 | 1.00 | 0.00 |

|      |     |     |     |    |       |         |        |      |      |
|------|-----|-----|-----|----|-------|---------|--------|------|------|
| ATOM | 154 | SG  | CYX | 11 | 4.736 | -12.800 | -3.266 | 1.00 | 0.00 |
| ATOM | 155 | C   | CYX | 11 | 4.918 | -9.081  | -5.164 | 1.00 | 0.00 |
| ATOM | 156 | O   | CYX | 11 | 3.831 | -8.520  | -5.134 | 1.00 | 0.00 |
| ATOM | 157 | N   | TYR | 12 | 6.061 | -8.414  | -5.255 | 1.00 | 0.00 |
| ATOM | 158 | H   | TYR | 12 | 6.913 | -8.951  | -5.179 | 1.00 | 0.00 |
| ATOM | 159 | CA  | TYR | 12 | 6.166 | -6.996  | -5.474 | 1.00 | 0.00 |
| ATOM | 160 | HA  | TYR | 12 | 5.420 | -6.441  | -4.905 | 1.00 | 0.00 |
| ATOM | 161 | CB  | TYR | 12 | 7.549 | -6.591  | -4.987 | 1.00 | 0.00 |
| ATOM | 162 | HB2 | TYR | 12 | 7.626 | -6.921  | -3.951 | 1.00 | 0.00 |
| ATOM | 163 | HB3 | TYR | 12 | 8.286 | -7.119  | -5.592 | 1.00 | 0.00 |
| ATOM | 164 | CG  | TYR | 12 | 7.808 | -5.109  | -5.062 | 1.00 | 0.00 |
| ATOM | 165 | CD1 | TYR | 12 | 6.986 | -4.217  | -4.354 | 1.00 | 0.00 |
| ATOM | 166 | HD1 | TYR | 12 | 6.160 | -4.603  | -3.758 | 1.00 | 0.00 |
| ATOM | 167 | CE1 | TYR | 12 | 7.224 | -2.833  | -4.412 | 1.00 | 0.00 |
| ATOM | 168 | HE1 | TYR | 12 | 6.559 | -2.142  | -3.895 | 1.00 | 0.00 |
| ATOM | 169 | CZ  | TYR | 12 | 8.274 | -2.337  | -5.204 | 1.00 | 0.00 |
| ATOM | 170 | OH  | TYR | 12 | 8.539 | -1.003  | -5.220 | 1.00 | 0.00 |
| ATOM | 171 | HH  | TYR | 12 | 7.950 | -0.496  | -4.657 | 1.00 | 0.00 |
| ATOM | 172 | CE2 | TYR | 12 | 9.100 | -3.232  | -5.917 | 1.00 | 0.00 |
| ATOM | 173 | HE2 | TYR | 12 | 9.925 | -2.849  | -6.519 | 1.00 | 0.00 |
| ATOM | 174 | CD2 | TYR | 12 | 8.860 | -4.617  | -5.852 | 1.00 | 0.00 |
| ATOM | 175 | HD2 | TYR | 12 | 9.490 | -5.306  | -6.415 | 1.00 | 0.00 |

|      |     |      |     |    |       |        |         |      |      |
|------|-----|------|-----|----|-------|--------|---------|------|------|
| ATOM | 176 | C    | TYR | 12 | 6.033 | -6.630 | -6.947  | 1.00 | 0.00 |
| ATOM | 177 | O    | TYR | 12 | 5.370 | -5.668 | -7.285  | 1.00 | 0.00 |
| ATOM | 178 | N    | GLN | 13 | 6.648 | -7.420 | -7.820  | 1.00 | 0.00 |
| ATOM | 179 | H    | GLN | 13 | 7.192 | -8.210 | -7.505  | 1.00 | 0.00 |
| ATOM | 180 | CA   | GLN | 13 | 6.577 | -7.159 | -9.242  | 1.00 | 0.00 |
| ATOM | 181 | HA   | GLN | 13 | 6.947 | -6.157 | -9.463  | 1.00 | 0.00 |
| ATOM | 182 | CB   | GLN | 13 | 7.442 | -8.174 | -9.988  | 1.00 | 0.00 |
| ATOM | 183 | HB2  | GLN | 13 | 8.492 | -7.963 | -9.785  | 1.00 | 0.00 |
| ATOM | 184 | HB3  | GLN | 13 | 7.198 | -9.176 | -9.636  | 1.00 | 0.00 |
| ATOM | 185 | CG   | GLN | 13 | 7.187 | -8.087 | -11.498 | 1.00 | 0.00 |
| ATOM | 186 | HG2  | GLN | 13 | 6.151 | -8.339 | -11.724 | 1.00 | 0.00 |
| ATOM | 187 | HG3  | GLN | 13 | 7.383 | -7.057 | -11.797 | 1.00 | 0.00 |
| ATOM | 188 | CD   | GLN | 13 | 8.093 | -9.003 | -12.296 | 1.00 | 0.00 |
| ATOM | 189 | OE1  | GLN | 13 | 9.064 | -9.563 | -11.808 | 1.00 | 0.00 |
| ATOM | 190 | NE2  | GLN | 13 | 7.771 | -9.216 | -13.551 | 1.00 | 0.00 |
| ATOM | 191 | HE21 | GLN | 13 | 8.346 | -9.819 | -14.122 | 1.00 | 0.00 |
| ATOM | 192 | HE22 | GLN | 13 | 6.950 | -8.775 | -13.941 | 1.00 | 0.00 |
| ATOM | 193 | C    | GLN | 13 | 5.130 | -7.253 | -9.709  | 1.00 | 0.00 |
| ATOM | 194 | O    | GLN | 13 | 4.661 | -6.463 | -10.491 | 1.00 | 0.00 |
| ATOM | 195 | N    | GLN | 14 | 4.403 | -8.263 | -9.249  | 1.00 | 0.00 |
| ATOM | 196 | H    | GLN | 14 | 4.828 | -8.978 | -8.677  | 1.00 | 0.00 |
| ATOM | 197 | CA   | GLN | 14 | 3.002 | -8.408 | -9.607  | 1.00 | 0.00 |

|      |     |      |     |    |       |         |         |      |      |
|------|-----|------|-----|----|-------|---------|---------|------|------|
| ATOM | 198 | HA   | GLN | 14 | 2.885 | -8.320  | -10.688 | 1.00 | 0.00 |
| ATOM | 199 | CB   | GLN | 14 | 2.478 | -9.777  | -9.168  | 1.00 | 0.00 |
| ATOM | 200 | HB2  | GLN | 14 | 1.389 | -9.739  | -9.147  | 1.00 | 0.00 |
| ATOM | 201 | HB3  | GLN | 14 | 2.801 | -10.520 | -9.897  | 1.00 | 0.00 |
| ATOM | 202 | CG   | GLN | 14 | 3.000 | -10.159 | -7.788  | 1.00 | 0.00 |
| ATOM | 203 | HG2  | GLN | 14 | 3.923 | -10.718 | -7.941  | 1.00 | 0.00 |
| ATOM | 204 | HG3  | GLN | 14 | 3.217 | -9.245  | -7.235  | 1.00 | 0.00 |
| ATOM | 205 | CD   | GLN | 14 | 2.062 | -10.996 | -6.979  | 1.00 | 0.00 |
| ATOM | 206 | OE1  | GLN | 14 | 1.305 | -11.753 | -7.532  | 1.00 | 0.00 |
| ATOM | 207 | NE2  | GLN | 14 | 2.096 | -10.847 | -5.662  | 1.00 | 0.00 |
| ATOM | 208 | HE21 | GLN | 14 | 1.479 | -11.393 | -5.079  | 1.00 | 0.00 |
| ATOM | 209 | HE22 | GLN | 14 | 2.739 | -10.187 | -5.248  | 1.00 | 0.00 |
| ATOM | 210 | C    | GLN | 14 | 2.147 | -7.298  | -9.006  | 1.00 | 0.00 |
| ATOM | 211 | O    | GLN | 14 | 1.128 | -6.941  | -9.566  | 1.00 | 0.00 |
| ATOM | 212 | N    | MET | 15 | 2.541 | -6.790  | -7.844  | 1.00 | 0.00 |
| ATOM | 213 | H    | MET | 15 | 3.382 | -7.167  | -7.432  | 1.00 | 0.00 |
| ATOM | 214 | CA   | MET | 15 | 1.863 | -5.725  | -7.157  | 1.00 | 0.00 |
| ATOM | 215 | HA   | MET | 15 | 0.890 | -6.075  | -6.815  | 1.00 | 0.00 |
| ATOM | 216 | CB   | MET | 15 | 2.659 | -5.255  | -5.956  | 1.00 | 0.00 |
| ATOM | 217 | HB2  | MET | 15 | 3.588 | -5.823  | -5.911  | 1.00 | 0.00 |
| ATOM | 218 | HB3  | MET | 15 | 2.888 | -4.196  | -6.084  | 1.00 | 0.00 |
| ATOM | 219 | CG   | MET | 15 | 1.890 | -5.451  | -4.682  | 1.00 | 0.00 |

|      |     |         |    |       |        |         |      |      |
|------|-----|---------|----|-------|--------|---------|------|------|
| ATOM | 220 | HG2 MET | 15 | 0.881 | -5.056 | -4.799  | 1.00 | 0.00 |
| ATOM | 221 | HG3 MET | 15 | 1.839 | -6.513 | -4.445  | 1.00 | 0.00 |
| ATOM | 222 | SD MET  | 15 | 2.710 | -4.586 | -3.342  | 1.00 | 0.00 |
| ATOM | 223 | CE MET  | 15 | 3.549 | -5.964 | -2.609  | 1.00 | 0.00 |
| ATOM | 224 | HE1 MET | 15 | 4.223 | -6.410 | -3.340  | 1.00 | 0.00 |
| ATOM | 225 | HE2 MET | 15 | 4.123 | -5.624 | -1.747  | 1.00 | 0.00 |
| ATOM | 226 | HE3 MET | 15 | 2.818 | -6.706 | -2.289  | 1.00 | 0.00 |
| ATOM | 227 | C MET   | 15 | 1.689 | -4.536 | -8.057  | 1.00 | 0.00 |
| ATOM | 228 | O MET   | 15 | 0.587 | -4.039 | -8.109  | 1.00 | 0.00 |
| ATOM | 229 | N GLU   | 16 | 2.741 | -4.062 | -8.716  | 1.00 | 0.00 |
| ATOM | 230 | H GLU   | 16 | 3.652 | -4.464 | -8.546  | 1.00 | 0.00 |
| ATOM | 231 | CA GLU  | 16 | 2.643 | -2.936 | -9.641  | 1.00 | 0.00 |
| ATOM | 232 | HA GLU  | 16 | 2.388 | -2.024 | -9.102  | 1.00 | 0.00 |
| ATOM | 233 | CB GLU  | 16 | 3.995 | -2.730 | -10.341 | 1.00 | 0.00 |
| ATOM | 234 | HB2 GLU | 16 | 4.096 | -1.672 | -10.587 | 1.00 | 0.00 |
| ATOM | 235 | HB3 GLU | 16 | 4.787 | -3.019 | -9.650  | 1.00 | 0.00 |
| ATOM | 236 | CG GLU  | 16 | 4.106 | -3.566 | -11.625 | 1.00 | 0.00 |
| ATOM | 237 | HG2 GLU | 16 | 3.732 | -4.550 | -11.345 | 1.00 | 0.00 |
| ATOM | 238 | HG3 GLU | 16 | 3.487 | -3.157 | -12.424 | 1.00 | 0.00 |
| ATOM | 239 | CD GLU  | 16 | 5.548 | -3.689 | -12.111 | 1.00 | 0.00 |
| ATOM | 240 | OE1 GLU | 16 | 6.391 | -4.256 | -11.374 | 1.00 | 0.00 |
| ATOM | 241 | OE2 GLU | 16 | 5.848 | -3.143 | -13.193 | 1.00 | 0.00 |

|      |     |     |     |    |        |        |         |      |      |
|------|-----|-----|-----|----|--------|--------|---------|------|------|
| ATOM | 242 | C   | GLU | 16 | 1.527  | -3.154 | -10.672 | 1.00 | 0.00 |
| ATOM | 243 | O   | GLU | 16 | 0.844  | -2.209 | -11.057 | 1.00 | 0.00 |
| ATOM | 244 | N   | GLU | 17 | 1.313  | -4.419 | -11.050 | 1.00 | 0.00 |
| ATOM | 245 | H   | GLU | 17 | 1.893  | -5.152 | -10.669 | 1.00 | 0.00 |
| ATOM | 246 | CA  | GLU | 17 | 0.300  | -4.778 | -12.010 | 1.00 | 0.00 |
| ATOM | 247 | HA  | GLU | 17 | 0.297  | -4.060 | -12.831 | 1.00 | 0.00 |
| ATOM | 248 | CB  | GLU | 17 | 0.577  | -6.175 | -12.581 | 1.00 | 0.00 |
| ATOM | 249 | HB2 | GLU | 17 | 1.612  | -6.451 | -12.379 | 1.00 | 0.00 |
| ATOM | 250 | HB3 | GLU | 17 | -0.090 | -6.898 | -12.113 | 1.00 | 0.00 |
| ATOM | 251 | CG  | GLU | 17 | 0.338  | -6.166 | -14.094 | 1.00 | 0.00 |
| ATOM | 252 | HG2 | GLU | 17 | -0.252 | -7.042 | -14.362 | 1.00 | 0.00 |
| ATOM | 253 | HG3 | GLU | 17 | -0.215 | -5.263 | -14.354 | 1.00 | 0.00 |
| ATOM | 254 | CD  | GLU | 17 | 1.663  | -6.190 | -14.860 | 1.00 | 0.00 |
| ATOM | 255 | OE1 | GLU | 17 | 2.551  | -5.386 | -14.525 | 1.00 | 0.00 |
| ATOM | 256 | OE2 | GLU | 17 | 1.774  | -7.026 | -15.784 | 1.00 | 0.00 |
| ATOM | 257 | C   | GLU | 17 | -1.074 | -4.748 | -11.349 | 1.00 | 0.00 |
| ATOM | 258 | O   | GLU | 17 | -2.087 | -4.509 | -12.006 | 1.00 | 0.00 |
| ATOM | 259 | N   | ALA | 18 | -1.134 | -5.009 | -10.045 | 1.00 | 0.00 |
| ATOM | 260 | H   | ALA | 18 | -0.292 | -5.323 | -9.584  | 1.00 | 0.00 |
| ATOM | 261 | CA  | ALA | 18 | -2.346 | -4.947 | -9.280  | 1.00 | 0.00 |
| ATOM | 262 | HA  | ALA | 18 | -3.190 | -4.594 | -9.873  | 1.00 | 0.00 |
| ATOM | 263 | CB  | ALA | 18 | -2.648 | -6.359 | -8.793  | 1.00 | 0.00 |



|      |     |     |     |    |        |        |        |      |      |
|------|-----|-----|-----|----|--------|--------|--------|------|------|
| ATOM | 264 | HB1 | ALA | 18 | -1.815 | -6.721 | -8.191 | 1.00 | 0.00 |
| ATOM | 265 | HB2 | ALA | 18 | -3.556 | -6.349 | -8.190 | 1.00 | 0.00 |
| ATOM | 266 | HB3 | ALA | 18 | -2.789 | -7.017 | -9.651 | 1.00 | 0.00 |
| ATOM | 267 | C   | ALA | 18 | -2.177 | -3.936 | -8.171 | 1.00 | 0.00 |
| ATOM | 268 | O   | ALA | 18 | -2.083 | -4.336 | -7.024 | 1.00 | 0.00 |
| ATOM | 269 | N   | GLU | 19 | -2.058 | -2.647 | -8.464 | 1.00 | 0.00 |
| ATOM | 270 | H   | GLU | 19 | -2.003 | -2.391 | -9.440 | 1.00 | 0.00 |
| ATOM | 271 | CA  | GLU | 19 | -1.887 | -1.602 | -7.467 | 1.00 | 0.00 |
| ATOM | 272 | HA  | GLU | 19 | -1.092 | -1.874 | -6.774 | 1.00 | 0.00 |
| ATOM | 273 | CB  | GLU | 19 | -1.511 | -0.283 | -8.148 | 1.00 | 0.00 |
| ATOM | 274 | HB2 | GLU | 19 | -0.464 | -0.332 | -8.449 | 1.00 | 0.00 |
| ATOM | 275 | HB3 | GLU | 19 | -2.136 | -0.157 | -9.032 | 1.00 | 0.00 |
| ATOM | 276 | CG  | GLU | 19 | -1.714 | 0.899  | -7.211 | 1.00 | 0.00 |
| ATOM | 277 | HG2 | GLU | 19 | -1.904 | 0.625  | -6.174 | 1.00 | 0.00 |
| ATOM | 278 | HG3 | GLU | 19 | -0.778 | 1.455  | -7.275 | 1.00 | 0.00 |
| ATOM | 279 | CD  | GLU | 19 | -2.886 | 1.790  | -7.737 | 1.00 | 0.00 |
| ATOM | 280 | OE1 | GLU | 19 | -3.868 | 1.401  | -8.414 | 1.00 | 0.00 |
| ATOM | 281 | OE2 | GLU | 19 | -2.909 | 2.968  | -7.363 | 1.00 | 0.00 |
| ATOM | 282 | C   | GLU | 19 | -3.186 | -1.541 | -6.614 | 1.00 | 0.00 |
| ATOM | 283 | O   | GLU | 19 | -4.028 | -0.650 | -6.597 | 1.00 | 0.00 |
| ATOM | 284 | N   | MET | 20 | -3.410 | -2.497 | -5.758 | 1.00 | 0.00 |
| ATOM | 285 | H   | MET | 20 | -2.741 | -3.248 | -5.665 | 1.00 | 0.00 |

|      |     |     |     |    |        |        |        |      |      |
|------|-----|-----|-----|----|--------|--------|--------|------|------|
| ATOM | 286 | CA  | MET | 20 | -4.602 | -2.538 | -4.948 | 1.00 | 0.00 |
| ATOM | 287 | HA  | MET | 20 | -5.382 | -1.907 | -5.376 | 1.00 | 0.00 |
| ATOM | 288 | CB  | MET | 20 | -5.103 | -3.962 | -4.903 | 1.00 | 0.00 |
| ATOM | 289 | HB2 | MET | 20 | -6.173 | -3.924 | -4.699 | 1.00 | 0.00 |
| ATOM | 290 | HB3 | MET | 20 | -4.936 | -4.397 | -5.889 | 1.00 | 0.00 |
| ATOM | 291 | CG  | MET | 20 | -4.423 | -4.807 | -3.860 | 1.00 | 0.00 |
| ATOM | 292 | HG2 | MET | 20 | -3.437 | -4.371 | -3.696 | 1.00 | 0.00 |
| ATOM | 293 | HG3 | MET | 20 | -5.015 | -4.719 | -2.949 | 1.00 | 0.00 |
| ATOM | 294 | SD  | MET | 20 | -4.242 | -6.514 | -4.272 | 1.00 | 0.00 |
| ATOM | 295 | CE  | MET | 20 | -2.973 | -6.432 | -5.493 | 1.00 | 0.00 |
| ATOM | 296 | HE1 | MET | 20 | -2.076 | -5.992 | -5.057 | 1.00 | 0.00 |
| ATOM | 297 | HE2 | MET | 20 | -2.747 | -7.436 | -5.852 | 1.00 | 0.00 |
| ATOM | 298 | HE3 | MET | 20 | -3.310 | -5.816 | -6.328 | 1.00 | 0.00 |
| ATOM | 299 | C   | MET | 20 | -4.255 | -2.030 | -3.577 | 1.00 | 0.00 |
| ATOM | 300 | O   | MET | 20 | -5.149 | -1.695 | -2.801 | 1.00 | 0.00 |
| ATOM | 301 | N   | LEU | 21 | -2.955 | -2.010 | -3.260 | 1.00 | 0.00 |
| ATOM | 302 | H   | LEU | 21 | -2.283 | -2.391 | -3.911 | 1.00 | 0.00 |
| ATOM | 303 | CA  | LEU | 21 | -2.483 | -1.569 | -1.971 | 1.00 | 0.00 |
| ATOM | 304 | HA  | LEU | 21 | -3.234 | -1.766 | -1.207 | 1.00 | 0.00 |
| ATOM | 305 | CB  | LEU | 21 | -1.213 | -2.321 | -1.610 | 1.00 | 0.00 |
| ATOM | 306 | HB2 | LEU | 21 | -0.546 | -1.965 | -2.396 | 1.00 | 0.00 |
| ATOM | 307 | HB3 | LEU | 21 | -0.828 | -2.010 | -0.639 | 1.00 | 0.00 |

|      |     |      |     |    |        |        |        |      |      |
|------|-----|------|-----|----|--------|--------|--------|------|------|
| ATOM | 308 | CG   | LEU | 21 | -1.293 | -3.860 | -1.662 | 1.00 | 0.00 |
| ATOM | 309 | HG   | LEU | 21 | -0.525 | -4.248 | -0.993 | 1.00 | 0.00 |
| ATOM | 310 | CD1  | LEU | 21 | -2.645 | -4.414 | -1.256 | 1.00 | 0.00 |
| ATOM | 311 | HD11 | LEU | 21 | -3.413 | -4.026 | -1.926 | 1.00 | 0.00 |
| ATOM | 312 | HD12 | LEU | 21 | -2.625 | -5.502 | -1.318 | 1.00 | 0.00 |
| ATOM | 313 | HD13 | LEU | 21 | -2.870 | -4.112 | -0.234 | 1.00 | 0.00 |
| ATOM | 314 | CD2  | LEU | 21 | -0.843 | -4.349 | -3.026 | 1.00 | 0.00 |
| ATOM | 315 | HD21 | LEU | 21 | 0.185  | -4.034 | -3.205 | 1.00 | 0.00 |
| ATOM | 316 | HD22 | LEU | 21 | -0.900 | -5.437 | -3.060 | 1.00 | 0.00 |
| ATOM | 317 | HD23 | LEU | 21 | -1.490 | -3.927 | -3.796 | 1.00 | 0.00 |
| ATOM | 318 | C    | LEU | 21 | -2.319 | -0.061 | -1.975 | 1.00 | 0.00 |
| ATOM | 319 | O    | LEU | 21 | -1.747 | 0.507  | -1.058 | 1.00 | 0.00 |
| ATOM | 320 | N    | ASN | 22 | -2.893 | 0.582  | -2.990 | 1.00 | 0.00 |
| ATOM | 321 | H    | ASN | 22 | -3.390 | 0.056  | -3.695 | 1.00 | 0.00 |
| ATOM | 322 | CA   | ASN | 22 | -2.864 | 2.014  | -3.103 | 1.00 | 0.00 |
| ATOM | 323 | HA   | ASN | 22 | -2.073 | 2.422  | -2.474 | 1.00 | 0.00 |
| ATOM | 324 | CB   | ASN | 22 | -2.598 | 2.418  | -4.536 | 1.00 | 0.00 |
| ATOM | 325 | HB2  | ASN | 22 | -1.652 | 2.157  | -5.010 | 1.00 | 0.00 |
| ATOM | 326 | HB3  | ASN | 22 | -3.402 | 1.839  | -4.989 | 1.00 | 0.00 |
| ATOM | 327 | CG   | ASN | 22 | -2.871 | 3.901  | -4.776 | 1.00 | 0.00 |
| ATOM | 328 | OD1  | ASN | 22 | -3.958 | 4.336  | -5.140 | 1.00 | 0.00 |
| ATOM | 329 | ND2  | ASN | 22 | -1.963 | 4.714  | -4.286 | 1.00 | 0.00 |

|      |     |      |     |    |        |       |        |      |      |
|------|-----|------|-----|----|--------|-------|--------|------|------|
| ATOM | 330 | HD21 | ASN | 22 | -2.068 | 5.712 | -4.402 | 1.00 | 0.00 |
| ATOM | 331 | HD22 | ASN | 22 | -1.164 | 4.338 | -3.797 | 1.00 | 0.00 |
| ATOM | 332 | C    | ASN | 22 | -4.209 | 2.576 | -2.709 | 1.00 | 0.00 |
| ATOM | 333 | O    | ASN | 22 | -4.263 | 3.593 | -2.046 | 1.00 | 0.00 |
| ATOM | 334 | N    | HIE | 23 | -5.307 | 1.899 | -3.057 | 1.00 | 0.00 |
| ATOM | 335 | H    | HIE | 23 | -5.207 | 1.045 | -3.586 | 1.00 | 0.00 |
| ATOM | 336 | CA   | HIE | 23 | -6.643 | 2.361 | -2.744 | 1.00 | 0.00 |
| ATOM | 337 | HA   | HIE | 23 | -6.749 | 3.415 | -3.003 | 1.00 | 0.00 |
| ATOM | 338 | CB   | HIE | 23 | -7.659 | 1.558 | -3.547 | 1.00 | 0.00 |
| ATOM | 339 | HB2  | HIE | 23 | -7.486 | 0.489 | -3.429 | 1.00 | 0.00 |
| ATOM | 340 | HB3  | HIE | 23 | -8.666 | 1.803 | -3.209 | 1.00 | 0.00 |
| ATOM | 341 | CG   | HIE | 23 | -7.622 | 1.839 | -5.022 | 1.00 | 0.00 |
| ATOM | 342 | ND1  | HIE | 23 | -8.581 | 2.554 | -5.713 | 1.00 | 0.00 |
| ATOM | 343 | CE1  | HIE | 23 | -8.212 | 2.588 | -7.014 | 1.00 | 0.00 |
| ATOM | 344 | HE1  | HIE | 23 | -8.833 | 3.111 | -7.741 | 1.00 | 0.00 |
| ATOM | 345 | NE2  | HIE | 23 | -7.048 | 1.909 | -7.164 | 1.00 | 0.00 |
| ATOM | 346 | HE2  | HIE | 23 | -6.535 | 1.765 | -8.023 | 1.00 | 0.00 |
| ATOM | 347 | CD2  | HIE | 23 | -6.666 | 1.435 | -5.922 | 1.00 | 0.00 |
| ATOM | 348 | HD2  | HIE | 23 | -5.747 | 0.858 | -5.818 | 1.00 | 0.00 |
| ATOM | 349 | C    | HIE | 23 | -6.885 | 2.218 | -1.255 | 1.00 | 0.00 |
| ATOM | 350 | O    | HIE | 23 | -7.142 | 3.225 | -0.600 | 1.00 | 0.00 |
| ATOM | 351 | N    | CYX | 24 | -6.817 | 0.980 | -0.741 | 1.00 | 0.00 |

|      |     |     |     |    |        |        |        |      |      |
|------|-----|-----|-----|----|--------|--------|--------|------|------|
| ATOM | 352 | H   | CYX | 24 | -6.687 | 0.183  | -1.348 | 1.00 | 0.00 |
| ATOM | 353 | CA  | CYX | 24 | -6.960 | 0.743  | 0.690  | 1.00 | 0.00 |
| ATOM | 354 | HA  | CYX | 24 | -7.959 | 1.041  | 1.008  | 1.00 | 0.00 |
| ATOM | 355 | CB  | CYX | 24 | -6.758 | -0.731 | 1.031  | 1.00 | 0.00 |
| ATOM | 356 | HB2 | CYX | 24 | -6.348 | -1.251 | 0.165  | 1.00 | 0.00 |
| ATOM | 357 | HB3 | CYX | 24 | -6.066 | -0.819 | 1.868  | 1.00 | 0.00 |
| ATOM | 358 | SG  | CYX | 24 | -8.257 | -1.600 | 1.493  | 1.00 | 0.00 |
| ATOM | 359 | C   | CYX | 24 | -5.951 | 1.586  | 1.458  | 1.00 | 0.00 |
| ATOM | 360 | O   | CYX | 24 | -6.275 | 2.019  | 2.542  | 1.00 | 0.00 |
| ATOM | 361 | N   | GLY | 25 | -4.808 | 1.913  | 0.852  | 1.00 | 0.00 |
| ATOM | 362 | H   | GLY | 25 | -4.637 | 1.540  | -0.071 | 1.00 | 0.00 |
| ATOM | 363 | CA  | GLY | 25 | -3.809 | 2.765  | 1.439  | 1.00 | 0.00 |
| ATOM | 364 | HA2 | GLY | 25 | -3.619 | 2.436  | 2.460  | 1.00 | 0.00 |
| ATOM | 365 | HA3 | GLY | 25 | -2.891 | 2.687  | 0.856  | 1.00 | 0.00 |
| ATOM | 366 | C   | GLY | 25 | -4.254 | 4.206  | 1.463  | 1.00 | 0.00 |
| ATOM | 367 | O   | GLY | 25 | -4.218 | 4.819  | 2.513  | 1.00 | 0.00 |
| ATOM | 368 | N   | MET | 26 | -4.793 | 4.724  | 0.368  | 1.00 | 0.00 |
| ATOM | 369 | H   | MET | 26 | -4.924 | 4.098  | -0.414 | 1.00 | 0.00 |
| ATOM | 370 | CA  | MET | 26 | -5.238 | 6.088  | 0.233  | 1.00 | 0.00 |
| ATOM | 371 | HA  | MET | 26 | -4.387 | 6.763  | 0.333  | 1.00 | 0.00 |
| ATOM | 372 | CB  | MET | 26 | -5.883 | 6.316  | -1.131 | 1.00 | 0.00 |
| ATOM | 373 | HB2 | MET | 26 | -5.815 | 5.395  | -1.709 | 1.00 | 0.00 |

|      |     |         |    |         |       |        |      |      |
|------|-----|---------|----|---------|-------|--------|------|------|
| ATOM | 374 | HB3 MET | 26 | -6.931  | 6.576 | -0.984 | 1.00 | 0.00 |
| ATOM | 375 | CG MET  | 26 | -5.184  | 7.438 | -1.883 | 1.00 | 0.00 |
| ATOM | 376 | HG2 MET | 26 | -5.794  | 8.341 | -1.836 | 1.00 | 0.00 |
| ATOM | 377 | HG3 MET | 26 | -4.214  | 7.631 | -1.425 | 1.00 | 0.00 |
| ATOM | 378 | SD MET  | 26 | -4.943  | 6.978 | -3.605 | 1.00 | 0.00 |
| ATOM | 379 | CE MET  | 26 | -3.607  | 8.113 | -4.035 | 1.00 | 0.00 |
| ATOM | 380 | HE1 MET | 26 | -2.745  | 7.919 | -3.397 | 1.00 | 0.00 |
| ATOM | 381 | HE2 MET | 26 | -3.326  | 7.967 | -5.078 | 1.00 | 0.00 |
| ATOM | 382 | HE3 MET | 26 | -3.941  | 9.141 | -3.891 | 1.00 | 0.00 |
| ATOM | 383 | C MET   | 26 | -6.284  | 6.393 | 1.260  | 1.00 | 0.00 |
| ATOM | 384 | O MET   | 26 | -6.203  | 7.436 | 1.864  | 1.00 | 0.00 |
| ATOM | 385 | N TYR   | 27 | -7.292  | 5.545 | 1.426  | 1.00 | 0.00 |
| ATOM | 386 | H TYR   | 27 | -7.344  | 4.740 | 0.819  | 1.00 | 0.00 |
| ATOM | 387 | CA TYR  | 27 | -8.317  | 5.709 | 2.445  | 1.00 | 0.00 |
| ATOM | 388 | HA TYR  | 27 | -9.037  | 6.481 | 2.172  | 1.00 | 0.00 |
| ATOM | 389 | CB TYR  | 27 | -9.047  | 4.374 | 2.544  | 1.00 | 0.00 |
| ATOM | 390 | HB2 TYR | 27 | -9.482  | 4.183 | 1.563  | 1.00 | 0.00 |
| ATOM | 391 | HB3 TYR | 27 | -8.304  | 3.608 | 2.767  | 1.00 | 0.00 |
| ATOM | 392 | CG TYR  | 27 | -10.135 | 4.341 | 3.592  | 1.00 | 0.00 |
| ATOM | 393 | CD1 TYR | 27 | -11.284 | 5.132 | 3.425  | 1.00 | 0.00 |
| ATOM | 394 | HD1 TYR | 27 | -11.389 | 5.764 | 2.542  | 1.00 | 0.00 |
| ATOM | 395 | CE1 TYR | 27 | -12.300 | 5.109 | 4.398  | 1.00 | 0.00 |

|      |     |          |    |         |       |       |      |      |
|------|-----|----------|----|---------|-------|-------|------|------|
| ATOM | 396 | HE1 TYR  | 27 | -13.203 | 5.703 | 4.258 | 1.00 | 0.00 |
| ATOM | 397 | CZ TYR   | 27 | -12.165 | 4.286 | 5.536 | 1.00 | 0.00 |
| ATOM | 398 | OH TYR   | 27 | -13.129 | 4.272 | 6.495 | 1.00 | 0.00 |
| ATOM | 399 | HH TYR   | 27 | -13.861 | 4.861 | 6.299 | 1.00 | 0.00 |
| ATOM | 400 | CE2 TYR  | 27 | -11.010 | 3.502 | 5.704 | 1.00 | 0.00 |
| ATOM | 401 | HE2 TYR  | 27 | -10.905 | 2.871 | 6.586 | 1.00 | 0.00 |
| ATOM | 402 | CD2 TYR  | 27 | -9.991  | 3.532 | 4.735 | 1.00 | 0.00 |
| ATOM | 403 | HD2 TYR  | 27 | -9.092  | 2.930 | 4.870 | 1.00 | 0.00 |
| ATOM | 404 | C TYR    | 27 | -7.740  | 6.058 | 3.813 | 1.00 | 0.00 |
| ATOM | 405 | O TYR    | 27 | -8.280  | 6.896 | 4.527 | 1.00 | 0.00 |
| ATOM | 406 | N LEU    | 28 | -6.584  | 5.481 | 4.122 | 1.00 | 0.00 |
| ATOM | 407 | H LEU    | 28 | -6.183  | 4.819 | 3.473 | 1.00 | 0.00 |
| ATOM | 408 | CA LEU   | 28 | -5.904  | 5.710 | 5.374 | 1.00 | 0.00 |
| ATOM | 409 | HA LEU   | 28 | -6.626  | 6.007 | 6.135 | 1.00 | 0.00 |
| ATOM | 410 | CB LEU   | 28 | -5.196  | 4.447 | 5.841 | 1.00 | 0.00 |
| ATOM | 411 | HB2 LEU  | 28 | -4.243  | 4.514 | 5.315 | 1.00 | 0.00 |
| ATOM | 412 | HB3 LEU  | 28 | -5.021  | 4.489 | 6.916 | 1.00 | 0.00 |
| ATOM | 413 | CG LEU   | 28 | -5.887  | 3.118 | 5.485 | 1.00 | 0.00 |
| ATOM | 414 | HG LEU   | 28 | -6.587  | 3.301 | 4.669 | 1.00 | 0.00 |
| ATOM | 415 | CD1 LEU  | 28 | -4.880  | 2.061 | 5.061 | 1.00 | 0.00 |
| ATOM | 416 | HD11 LEU | 28 | -4.180  | 1.878 | 5.876 | 1.00 | 0.00 |
| ATOM | 417 | HD12 LEU | 28 | -5.403  | 1.137 | 4.817 | 1.00 | 0.00 |

|      |     |          |    |        |        |       |      |      |
|------|-----|----------|----|--------|--------|-------|------|------|
| ATOM | 418 | HD13 LEU | 28 | -4.333 | 2.410  | 4.185 | 1.00 | 0.00 |
| ATOM | 419 | CD2 LEU  | 28 | -6.750 | 2.645  | 6.617 | 1.00 | 0.00 |
| ATOM | 420 | HD21 LEU | 28 | -7.515 | 3.393  | 6.828 | 1.00 | 0.00 |
| ATOM | 421 | HD22 LEU | 28 | -7.228 | 1.705  | 6.342 | 1.00 | 0.00 |
| ATOM | 422 | HD23 LEU | 28 | -6.135 | 2.494  | 7.504 | 1.00 | 0.00 |
| ATOM | 423 | C LEU    | 28 | -4.927 | 6.863  | 5.216 | 1.00 | 0.00 |
| ATOM | 424 | O LEU    | 28 | -4.711 | 7.597  | 6.163 | 1.00 | 0.00 |
| ATOM | 425 | N MET    | 29 | -4.437 | 7.121  | 4.007 | 1.00 | 0.00 |
| ATOM | 426 | H MET    | 29 | -4.629 | 6.414  | 3.312 | 1.00 | 0.00 |
| ATOM | 427 | CA MET   | 29 | -3.599 | 8.236  | 3.634 | 1.00 | 0.00 |
| ATOM | 428 | HA MET   | 29 | -2.957 | 8.523  | 4.467 | 1.00 | 0.00 |
| ATOM | 429 | CB MET   | 29 | -2.718 | 7.838  | 2.455 | 1.00 | 0.00 |
| ATOM | 430 | HB2 MET  | 29 | -2.920 | 6.797  | 2.203 | 1.00 | 0.00 |
| ATOM | 431 | HB3 MET  | 29 | -2.966 | 8.472  | 1.603 | 1.00 | 0.00 |
| ATOM | 432 | CG MET   | 29 | -1.247 | 8.000  | 2.795 | 1.00 | 0.00 |
| ATOM | 433 | HG2 MET  | 29 | -1.072 | 7.596  | 3.791 | 1.00 | 0.00 |
| ATOM | 434 | HG3 MET  | 29 | -0.657 | 7.442  | 2.068 | 1.00 | 0.00 |
| ATOM | 435 | SD MET   | 29 | -0.747 | 9.724  | 2.762 | 1.00 | 0.00 |
| ATOM | 436 | CE MET   | 29 | -0.752 | 9.972  | 0.977 | 1.00 | 0.00 |
| ATOM | 437 | HE1 MET  | 29 | -1.751 | 9.783  | 0.586 | 1.00 | 0.00 |
| ATOM | 438 | HE2 MET  | 29 | -0.463 | 10.999 | 0.751 | 1.00 | 0.00 |
| ATOM | 439 | HE3 MET  | 29 | -0.044 | 9.286  | 0.512 | 1.00 | 0.00 |



|      |     |     |     |    |        |        |        |      |      |
|------|-----|-----|-----|----|--------|--------|--------|------|------|
| ATOM | 440 | C   | MET | 29 | -4.387 | 9.507  | 3.335  | 1.00 | 0.00 |
| ATOM | 441 | O   | MET | 29 | -3.853 | 10.498 | 2.850  | 1.00 | 0.00 |
| ATOM | 442 | N   | LYS | 30 | -5.695 | 9.490  | 3.562  | 1.00 | 0.00 |
| ATOM | 443 | H   | LYS | 30 | -6.118 | 8.631  | 3.881  | 1.00 | 0.00 |
| ATOM | 444 | CA  | LYS | 30 | -6.555 | 10.620 | 3.296  | 1.00 | 0.00 |
| ATOM | 445 | HA  | LYS | 30 | -6.213 | 11.156 | 2.410  | 1.00 | 0.00 |
| ATOM | 446 | CB  | LYS | 30 | -7.985 | 10.126 | 3.048  | 1.00 | 0.00 |
| ATOM | 447 | HB2 | LYS | 30 | -8.054 | 9.072  | 3.314  | 1.00 | 0.00 |
| ATOM | 448 | HB3 | LYS | 30 | -8.677 | 10.702 | 3.662  | 1.00 | 0.00 |
| ATOM | 449 | CG  | LYS | 30 | -8.346 | 10.303 | 1.568  | 1.00 | 0.00 |
| ATOM | 450 | HG2 | LYS | 30 | -7.435 | 10.260 | 0.970  | 1.00 | 0.00 |
| ATOM | 451 | HG3 | LYS | 30 | -9.017 | 9.500  | 1.265  | 1.00 | 0.00 |
| ATOM | 452 | CD  | LYS | 30 | -9.036 | 11.654 | 1.350  | 1.00 | 0.00 |
| ATOM | 453 | HD2 | LYS | 30 | -9.944 | 11.478 | 0.774  | 1.00 | 0.00 |
| ATOM | 454 | HD3 | LYS | 30 | -9.299 | 12.059 | 2.327  | 1.00 | 0.00 |
| ATOM | 455 | CE  | LYS | 30 | -8.151 | 12.650 | 0.610  | 1.00 | 0.00 |
| ATOM | 456 | HE2 | LYS | 30 | -8.575 | 13.649 | 0.718  | 1.00 | 0.00 |
| ATOM | 457 | HE3 | LYS | 30 | -7.153 | 12.630 | 1.048  | 1.00 | 0.00 |
| ATOM | 458 | NZ  | LYS | 30 | -8.065 | 12.303 | -0.832 | 1.00 | 0.00 |
| ATOM | 459 | HZ1 | LYS | 30 | -8.989 | 12.322 | -1.239 | 1.00 | 0.00 |
| ATOM | 460 | HZ2 | LYS | 30 | -7.475 | 12.973 | -1.305 | 1.00 | 0.00 |
| ATOM | 461 | HZ3 | LYS | 30 | -7.672 | 11.379 | -0.933 | 1.00 | 0.00 |

|      |     |      |     |    |        |        |       |      |      |
|------|-----|------|-----|----|--------|--------|-------|------|------|
| ATOM | 462 | C    | LYS | 30 | -6.456 | 11.587 | 4.453 | 1.00 | 0.00 |
| ATOM | 463 | O    | LYS | 30 | -6.761 | 12.751 | 4.242 | 1.00 | 0.00 |
| ATOM | 464 | N    | ASN | 31 | -6.066 | 11.087 | 5.629 | 1.00 | 0.00 |
| ATOM | 465 | H    | ASN | 31 | -5.938 | 10.090 | 5.721 | 1.00 | 0.00 |
| ATOM | 466 | CA   | ASN | 31 | -5.829 | 11.924 | 6.795 | 1.00 | 0.00 |
| ATOM | 467 | HA   | ASN | 31 | -6.244 | 12.921 | 6.647 | 1.00 | 0.00 |
| ATOM | 468 | CB   | ASN | 31 | -6.519 | 11.280 | 8.000 | 1.00 | 0.00 |
| ATOM | 469 | HB2  | ASN | 31 | -6.499 | 10.193 | 7.935 | 1.00 | 0.00 |
| ATOM | 470 | HB3  | ASN | 31 | -5.983 | 11.601 | 8.893 | 1.00 | 0.00 |
| ATOM | 471 | CG   | ASN | 31 | -7.955 | 11.730 | 8.112 | 1.00 | 0.00 |
| ATOM | 472 | OD1  | ASN | 31 | -8.358 | 12.446 | 9.003 | 1.00 | 0.00 |
| ATOM | 473 | ND2  | ASN | 31 | -8.758 | 11.342 | 7.150 | 1.00 | 0.00 |
| ATOM | 474 | HD21 | ASN | 31 | -9.731 | 11.612 | 7.169 | 1.00 | 0.00 |
| ATOM | 475 | HD22 | ASN | 31 | -8.399 | 10.776 | 6.394 | 1.00 | 0.00 |
| ATOM | 476 | C    | ASN | 31 | -4.338 | 12.077 | 7.084 | 1.00 | 0.00 |
| ATOM | 477 | O    | ASN | 31 | -3.974 | 12.826 | 7.979 | 1.00 | 0.00 |
| ATOM | 478 | N    | LEU | 32 | -3.513 | 11.324 | 6.355 | 1.00 | 0.00 |
| ATOM | 479 | H    | LEU | 32 | -3.885 | 10.646 | 5.706 | 1.00 | 0.00 |
| ATOM | 480 | CA   | LEU | 32 | -2.092 | 11.392 | 6.526 | 1.00 | 0.00 |
| ATOM | 481 | HA   | LEU | 32 | -1.855 | 11.632 | 7.562 | 1.00 | 0.00 |
| ATOM | 482 | CB   | LEU | 32 | -1.449 | 10.056 | 6.176 | 1.00 | 0.00 |
| ATOM | 483 | HB2  | LEU | 32 | -1.792 | 9.823  | 5.167 | 1.00 | 0.00 |

|      |     |          |    |        |        |       |      |      |
|------|-----|----------|----|--------|--------|-------|------|------|
| ATOM | 484 | HB3 LEU  | 32 | -0.363 | 10.156 | 6.175 | 1.00 | 0.00 |
| ATOM | 485 | CG LEU   | 32 | -1.855 | 8.934  | 7.122 | 1.00 | 0.00 |
| ATOM | 486 | HG LEU   | 32 | -2.924 | 9.006  | 7.319 | 1.00 | 0.00 |
| ATOM | 487 | CD1 LEU  | 32 | -1.544 | 7.582  | 6.505 | 1.00 | 0.00 |
| ATOM | 488 | HD11 LEU | 32 | -0.474 | 7.510  | 6.307 | 1.00 | 0.00 |
| ATOM | 489 | HD12 LEU | 32 | -1.840 | 6.791  | 7.193 | 1.00 | 0.00 |
| ATOM | 490 | HD13 LEU | 32 | -2.094 | 7.474  | 5.570 | 1.00 | 0.00 |
| ATOM | 491 | CD2 LEU  | 32 | -1.150 | 9.094  | 8.456 | 1.00 | 0.00 |
| ATOM | 492 | HD21 LEU | 32 | -1.423 | 10.052 | 8.899 | 1.00 | 0.00 |
| ATOM | 493 | HD22 LEU | 32 | -1.448 | 8.287  | 9.124 | 1.00 | 0.00 |
| ATOM | 494 | HD23 LEU | 32 | -0.071 | 9.060  | 8.303 | 1.00 | 0.00 |
| ATOM | 495 | C LEU    | 32 | -1.532 | 12.517 | 5.699 | 1.00 | 0.00 |
| ATOM | 496 | O LEU    | 32 | -0.471 | 12.947 | 6.103 | 1.00 | 0.00 |
| ATOM | 497 | N GLY    | 33 | -2.245 | 12.981 | 4.646 | 1.00 | 0.00 |
| ATOM | 498 | H GLY    | 33 | -3.129 | 12.527 | 4.466 | 1.00 | 0.00 |
| ATOM | 499 | CA GLY   | 33 | -1.837 | 14.068 | 3.768 | 1.00 | 0.00 |
| ATOM | 500 | HA2 GLY  | 33 | -2.360 | 13.968 | 2.816 | 1.00 | 0.00 |
| ATOM | 501 | HA3 GLY  | 33 | -2.107 | 15.017 | 4.232 | 1.00 | 0.00 |
| ATOM | 502 | C GLY    | 33 | -0.334 | 14.052 | 3.512 | 1.00 | 0.00 |
| ATOM | 503 | O GLY    | 33 | 0.446  | 14.734 | 4.168 | 1.00 | 0.00 |
| ATOM | 504 | N GLU    | 34 | 0.072  | 13.307 | 2.492 | 1.00 | 0.00 |
| ATOM | 505 | H GLU    | 34 | -0.585 | 12.769 | 1.946 | 1.00 | 0.00 |

|      |     |     |     |    |       |        |        |      |      |
|------|-----|-----|-----|----|-------|--------|--------|------|------|
| ATOM | 506 | CA  | GLU | 34 | 1.488 | 13.186 | 2.182  | 1.00 | 0.00 |
| ATOM | 507 | HA  | GLU | 34 | 2.066 | 13.187 | 3.106  | 1.00 | 0.00 |
| ATOM | 508 | CB  | GLU | 34 | 1.773 | 11.886 | 1.429  | 1.00 | 0.00 |
| ATOM | 509 | HB2 | GLU | 34 | 1.466 | 11.046 | 2.051  | 1.00 | 0.00 |
| ATOM | 510 | HB3 | GLU | 34 | 1.195 | 11.883 | 0.504  | 1.00 | 0.00 |
| ATOM | 511 | CG  | GLU | 34 | 3.262 | 11.759 | 1.100  | 1.00 | 0.00 |
| ATOM | 512 | HG2 | GLU | 34 | 3.407 | 10.760 | 0.690  | 1.00 | 0.00 |
| ATOM | 513 | HG3 | GLU | 34 | 3.538 | 12.502 | 0.351  | 1.00 | 0.00 |
| ATOM | 514 | CD  | GLU | 34 | 4.141 | 11.934 | 2.339  | 1.00 | 0.00 |
| ATOM | 515 | OE1 | GLU | 34 | 3.657 | 11.679 | 3.459  | 1.00 | 0.00 |
| ATOM | 516 | OE2 | GLU | 34 | 5.299 | 12.362 | 2.174  | 1.00 | 0.00 |
| ATOM | 517 | C   | GLU | 34 | 1.965 | 14.395 | 1.385  | 1.00 | 0.00 |
| ATOM | 518 | O   | GLU | 34 | 2.180 | 14.321 | 0.173  | 1.00 | 0.00 |
| ATOM | 519 | N   | ARG | 35 | 1.974 | 15.566 | 2.018  | 1.00 | 0.00 |
| ATOM | 520 | H   | ARG | 35 | 1.642 | 15.616 | 2.970  | 1.00 | 0.00 |
| ATOM | 521 | CA  | ARG | 35 | 2.414 | 16.791 | 1.379  | 1.00 | 0.00 |
| ATOM | 522 | HA  | ARG | 35 | 3.435 | 16.674 | 1.016  | 1.00 | 0.00 |
| ATOM | 523 | CB  | ARG | 35 | 1.502 | 17.128 | 0.183  | 1.00 | 0.00 |
| ATOM | 524 | HB2 | ARG | 35 | 1.209 | 16.203 | -0.312 | 1.00 | 0.00 |
| ATOM | 525 | HB3 | ARG | 35 | 0.613 | 17.642 | 0.548  | 1.00 | 0.00 |
| ATOM | 526 | CG  | ARG | 35 | 2.234 | 18.024 | -0.809 | 1.00 | 0.00 |
| ATOM | 527 | HG2 | ARG | 35 | 1.617 | 18.901 | -1.010 | 1.00 | 0.00 |

|      |     |      |     |    |       |        |        |      |      |
|------|-----|------|-----|----|-------|--------|--------|------|------|
| ATOM | 528 | HG3  | ARG | 35 | 3.178 | 18.339 | -0.365 | 1.00 | 0.00 |
| ATOM | 529 | CD   | ARG | 35 | 2.510 | 17.282 | -2.123 | 1.00 | 0.00 |
| ATOM | 530 | HD2  | ARG | 35 | 2.521 | 16.208 | -1.938 | 1.00 | 0.00 |
| ATOM | 531 | HD3  | ARG | 35 | 1.728 | 17.519 | -2.845 | 1.00 | 0.00 |
| ATOM | 532 | NE   | ARG | 35 | 3.809 | 17.675 | -2.691 | 1.00 | 0.00 |
| ATOM | 533 | HE   | ARG | 35 | 4.439 | 18.158 | -2.067 | 1.00 | 0.00 |
| ATOM | 534 | CZ   | ARG | 35 | 4.221 | 17.401 | -3.912 | 1.00 | 0.00 |
| ATOM | 535 | NH1  | ARG | 35 | 3.444 | 16.777 | -4.762 | 1.00 | 0.00 |
| ATOM | 536 | HH11 | ARG | 35 | 2.514 | 16.500 | -4.482 | 1.00 | 0.00 |
| ATOM | 537 | HH12 | ARG | 35 | 3.779 | 16.577 | -5.694 | 1.00 | 0.00 |
| ATOM | 538 | NH2  | ARG | 35 | 5.399 | 17.801 | -4.313 | 1.00 | 0.00 |
| ATOM | 539 | HH21 | ARG | 35 | 5.994 | 18.322 | -3.684 | 1.00 | 0.00 |
| ATOM | 540 | HH22 | ARG | 35 | 5.709 | 17.588 | -5.251 | 1.00 | 0.00 |
| ATOM | 541 | C    | ARG | 35 | 2.394 | 17.913 | 2.393  | 1.00 | 0.00 |
| ATOM | 542 | O    | ARG | 35 | 3.447 | 18.428 | 2.729  | 1.00 | 0.00 |
| ATOM | 543 | N    | SER | 36 | 1.189 | 18.344 | 2.777  | 1.00 | 0.00 |
| ATOM | 544 | H    | SER | 36 | 0.371 | 17.912 | 2.372  | 1.00 | 0.00 |
| ATOM | 545 | CA   | SER | 36 | 0.997 | 19.420 | 3.736  | 1.00 | 0.00 |
| ATOM | 546 | HA   | SER | 36 | 1.512 | 19.192 | 4.669  | 1.00 | 0.00 |
| ATOM | 547 | CB   | SER | 36 | 1.571 | 20.720 | 3.166  | 1.00 | 0.00 |
| ATOM | 548 | HB2  | SER | 36 | 2.649 | 20.608 | 3.051  | 1.00 | 0.00 |
| ATOM | 549 | HB3  | SER | 36 | 1.120 | 20.907 | 2.191  | 1.00 | 0.00 |

|      |     |      |     |    |        |        |       |      |      |
|------|-----|------|-----|----|--------|--------|-------|------|------|
| ATOM | 550 | OG   | SER | 36 | 1.302  | 21.801 | 4.020 | 1.00 | 0.00 |
| ATOM | 551 | HG   | SER | 36 | 1.670  | 22.605 | 3.644 | 1.00 | 0.00 |
| ATOM | 552 | C    | SER | 36 | -0.487 | 19.588 | 4.028 | 1.00 | 0.00 |
| ATOM | 553 | O    | SER | 36 | -0.936 | 19.369 | 5.146 | 1.00 | 0.00 |
| ATOM | 554 | N    | GLN | 37 | -1.269 | 19.925 | 2.996 | 1.00 | 0.00 |
| ATOM | 555 | H    | GLN | 37 | -0.854 | 20.094 | 2.090 | 1.00 | 0.00 |
| ATOM | 556 | CA   | GLN | 37 | -2.705 | 20.123 | 3.145 | 1.00 | 0.00 |
| ATOM | 557 | HA   | GLN | 37 | -3.140 | 19.301 | 3.712 | 1.00 | 0.00 |
| ATOM | 558 | CB   | GLN | 37 | -2.975 | 21.429 | 3.893 | 1.00 | 0.00 |
| ATOM | 559 | HB2  | GLN | 37 | -2.251 | 21.543 | 4.700 | 1.00 | 0.00 |
| ATOM | 560 | HB3  | GLN | 37 | -2.884 | 22.269 | 3.203 | 1.00 | 0.00 |
| ATOM | 561 | CG   | GLN | 37 | -4.389 | 21.400 | 4.477 | 1.00 | 0.00 |
| ATOM | 562 | HG2  | GLN | 37 | -5.118 | 21.569 | 3.684 | 1.00 | 0.00 |
| ATOM | 563 | HG3  | GLN | 37 | -4.556 | 20.419 | 4.921 | 1.00 | 0.00 |
| ATOM | 564 | CD   | GLN | 37 | -4.585 | 22.459 | 5.550 | 1.00 | 0.00 |
| ATOM | 565 | OE1  | GLN | 37 | -3.683 | 23.149 | 5.986 | 1.00 | 0.00 |
| ATOM | 566 | NE2  | GLN | 37 | -5.808 | 22.628 | 6.000 | 1.00 | 0.00 |
| ATOM | 567 | HE21 | GLN | 37 | -5.989 | 23.320 | 6.713 | 1.00 | 0.00 |
| ATOM | 568 | HE22 | GLN | 37 | -6.561 | 22.066 | 5.630 | 1.00 | 0.00 |
| ATOM | 569 | C    | GLN | 37 | -3.387 | 20.118 | 1.785 | 1.00 | 0.00 |
| ATOM | 570 | O    | GLN | 37 | -3.774 | 21.145 | 1.233 | 1.00 | 0.00 |
| ATOM | 571 | N    | VAL | 38 | -3.406 | 18.947 | 1.160 | 1.00 | 0.00 |

|      |     |      |     |    |        |        |        |      |      |
|------|-----|------|-----|----|--------|--------|--------|------|------|
| ATOM | 572 | H    | VAL | 38 | -2.896 | 18.159 | 1.532  | 1.00 | 0.00 |
| ATOM | 573 | CA   | VAL | 38 | -4.062 | 18.797 | -0.131 | 1.00 | 0.00 |
| ATOM | 574 | HA   | VAL | 38 | -3.849 | 19.635 | -0.796 | 1.00 | 0.00 |
| ATOM | 575 | CB   | VAL | 38 | -3.598 | 17.506 | -0.808 | 1.00 | 0.00 |
| ATOM | 576 | HB   | VAL | 38 | -4.125 | 17.381 | -1.754 | 1.00 | 0.00 |
| ATOM | 577 | CG1  | VAL | 38 | -2.088 | 17.582 | -1.071 | 1.00 | 0.00 |
| ATOM | 578 | HG11 | VAL | 38 | -1.560 | 17.707 | -0.126 | 1.00 | 0.00 |
| ATOM | 579 | HG12 | VAL | 38 | -1.756 | 16.663 | -1.554 | 1.00 | 0.00 |
| ATOM | 580 | HG13 | VAL | 38 | -1.874 | 18.431 | -1.721 | 1.00 | 0.00 |
| ATOM | 581 | CG2  | VAL | 38 | -3.925 | 16.269 | 0.037  | 1.00 | 0.00 |
| ATOM | 582 | HG21 | VAL | 38 | -5.002 | 16.207 | 0.188  | 1.00 | 0.00 |
| ATOM | 583 | HG22 | VAL | 38 | -3.579 | 15.374 | -0.480 | 1.00 | 0.00 |
| ATOM | 584 | HG23 | VAL | 38 | -3.426 | 16.347 | 1.003  | 1.00 | 0.00 |
| ATOM | 585 | C    | VAL | 38 | -5.573 | 18.868 | 0.022  | 1.00 | 0.00 |
| ATOM | 586 | O    | VAL | 38 | -6.077 | 18.889 | 1.146  | 1.00 | 0.00 |
| ATOM | 587 | N    | SER | 39 | -6.284 | 18.876 | -1.111 | 1.00 | 0.00 |
| ATOM | 588 | H    | SER | 39 | -5.807 | 18.929 | -2.000 | 1.00 | 0.00 |
| ATOM | 589 | CA   | SER | 39 | -7.736 | 18.900 | -1.107 | 1.00 | 0.00 |
| ATOM | 590 | HA   | SER | 39 | -8.085 | 19.853 | -0.709 | 1.00 | 0.00 |
| ATOM | 591 | CB   | SER | 39 | -8.291 | 18.730 | -2.536 | 1.00 | 0.00 |
| ATOM | 592 | HB2  | SER | 39 | -9.125 | 19.422 | -2.656 | 1.00 | 0.00 |
| ATOM | 593 | HB3  | SER | 39 | -7.498 | 18.993 | -3.237 | 1.00 | 0.00 |

|      |     |     |     |    |         |        |        |      |      |
|------|-----|-----|-----|----|---------|--------|--------|------|------|
| ATOM | 594 | OG  | SER | 39 | -8.733  | 17.405 | -2.797 | 1.00 | 0.00 |
| ATOM | 595 | HG  | SER | 39 | -9.068  | 17.351 | -3.695 | 1.00 | 0.00 |
| ATOM | 596 | C   | SER | 39 | -8.314  | 17.834 | -0.163 | 1.00 | 0.00 |
| ATOM | 597 | O   | SER | 39 | -7.679  | 16.825 | 0.184  | 1.00 | 0.00 |
| ATOM | 598 | N   | PRO | 40 | -9.603  | 17.974 | 0.151  | 1.00 | 0.00 |
| ATOM | 599 | CD  | PRO | 40 | -10.502 | 19.024 | -0.299 | 1.00 | 0.00 |
| ATOM | 600 | HD2 | PRO | 40 | -10.647 | 18.903 | -1.373 | 1.00 | 0.00 |
| ATOM | 601 | HD3 | PRO | 40 | -10.021 | 19.983 | -0.105 | 1.00 | 0.00 |
| ATOM | 602 | CG  | PRO | 40 | -11.796 | 18.852 | 0.491  | 1.00 | 0.00 |
| ATOM | 603 | HG2 | PRO | 40 | -12.607 | 18.619 | -0.199 | 1.00 | 0.00 |
| ATOM | 604 | HG3 | PRO | 40 | -12.021 | 19.782 | 1.013  | 1.00 | 0.00 |
| ATOM | 605 | CB  | PRO | 40 | -11.560 | 17.714 | 1.480  | 1.00 | 0.00 |
| ATOM | 606 | HB2 | PRO | 40 | -12.395 | 17.015 | 1.452  | 1.00 | 0.00 |
| ATOM | 607 | HB3 | PRO | 40 | -11.429 | 18.083 | 2.497  | 1.00 | 0.00 |
| ATOM | 608 | CA  | PRO | 40 | -10.277 | 17.014 | 1.007  | 1.00 | 0.00 |
| ATOM | 609 | HA  | PRO | 40 | -9.645  | 16.822 | 1.873  | 1.00 | 0.00 |
| ATOM | 610 | C   | PRO | 40 | -10.550 | 15.698 | 0.273  | 1.00 | 0.00 |
| ATOM | 611 | O   | PRO | 40 | -9.989  | 15.368 | -0.779 | 1.00 | 0.00 |
| ATOM | 612 | N   | ARG | 41 | -11.407 | 14.866 | 0.858  | 1.00 | 0.00 |
| ATOM | 613 | H   | ARG | 41 | -11.743 | 15.088 | 1.784  | 1.00 | 0.00 |
| ATOM | 614 | CA  | ARG | 41 | -11.828 | 13.628 | 0.258  | 1.00 | 0.00 |
| ATOM | 615 | HA  | ARG | 41 | -10.981 | 13.151 | -0.235 | 1.00 | 0.00 |



|      |     |      |     |    |         |        |        |      |      |
|------|-----|------|-----|----|---------|--------|--------|------|------|
| ATOM | 616 | CB   | ARG | 41 | -12.377 | 12.674 | 1.322  | 1.00 | 0.00 |
| ATOM | 617 | HB2  | ARG | 41 | -11.750 | 12.735 | 2.211  | 1.00 | 0.00 |
| ATOM | 618 | HB3  | ARG | 41 | -13.395 | 12.970 | 1.574  | 1.00 | 0.00 |
| ATOM | 619 | CG   | ARG | 41 | -12.379 | 11.228 | 0.794  | 1.00 | 0.00 |
| ATOM | 620 | HG2  | ARG | 41 | -11.797 | 11.208 | -0.128 | 1.00 | 0.00 |
| ATOM | 621 | HG3  | ARG | 41 | -11.897 | 10.598 | 1.541  | 1.00 | 0.00 |
| ATOM | 622 | CD   | ARG | 41 | -13.786 | 10.705 | 0.518  | 1.00 | 0.00 |
| ATOM | 623 | HD2  | ARG | 41 | -14.513 | 11.497 | 0.700  | 1.00 | 0.00 |
| ATOM | 624 | HD3  | ARG | 41 | -13.858 | 10.378 | -0.520 | 1.00 | 0.00 |
| ATOM | 625 | NE   | ARG | 41 | -14.097 | 9.574  | 1.388  | 1.00 | 0.00 |
| ATOM | 626 | HE   | ARG | 41 | -14.025 | 8.656  | 0.975  | 1.00 | 0.00 |
| ATOM | 627 | CZ   | ARG | 41 | -14.557 | 9.676  | 2.622  | 1.00 | 0.00 |
| ATOM | 628 | NH1  | ARG | 41 | -14.707 | 10.847 | 3.194  | 1.00 | 0.00 |
| ATOM | 629 | HH11 | ARG | 41 | -14.468 | 11.688 | 2.687  | 1.00 | 0.00 |
| ATOM | 630 | HH12 | ARG | 41 | -15.060 | 10.903 | 4.138  | 1.00 | 0.00 |
| ATOM | 631 | NH2  | ARG | 41 | -14.765 | 8.597  | 3.323  | 1.00 | 0.00 |
| ATOM | 632 | HH21 | ARG | 41 | -14.573 | 7.692  | 2.919  | 1.00 | 0.00 |
| ATOM | 633 | HH22 | ARG | 41 | -15.117 | 8.672  | 4.266  | 1.00 | 0.00 |
| ATOM | 634 | C    | ARG | 41 | -12.857 | 13.891 | -0.818 | 1.00 | 0.00 |
| ATOM | 635 | O    | ARG | 41 | -13.870 | 13.236 | -0.810 | 1.00 | 0.00 |
| ATOM | 636 | N    | MET | 42 | -12.609 | 14.823 | -1.725 | 1.00 | 0.00 |
| ATOM | 637 | H    | MET | 42 | -11.754 | 15.358 | -1.659 | 1.00 | 0.00 |

|      |     |     |     |    |         |        |        |      |      |
|------|-----|-----|-----|----|---------|--------|--------|------|------|
| ATOM | 638 | CA  | MET | 42 | -13.521 | 15.114 | -2.819 | 1.00 | 0.00 |
| ATOM | 639 | HA  | MET | 42 | -14.396 | 15.654 | -2.457 | 1.00 | 0.00 |
| ATOM | 640 | CB  | MET | 42 | -12.797 | 15.988 | -3.844 | 1.00 | 0.00 |
| ATOM | 641 | HB2 | MET | 42 | -13.417 | 16.061 | -4.738 | 1.00 | 0.00 |
| ATOM | 642 | HB3 | MET | 42 | -12.658 | 16.981 | -3.417 | 1.00 | 0.00 |
| ATOM | 643 | CG  | MET | 42 | -11.429 | 15.396 | -4.218 | 1.00 | 0.00 |
| ATOM | 644 | HG2 | MET | 42 | -10.687 | 15.801 | -3.529 | 1.00 | 0.00 |
| ATOM | 645 | HG3 | MET | 42 | -11.486 | 14.315 | -4.096 | 1.00 | 0.00 |
| ATOM | 646 | SD  | MET | 42 | -10.936 | 15.776 | -5.908 | 1.00 | 0.00 |
| ATOM | 647 | CE  | MET | 42 | -10.463 | 17.508 | -5.656 | 1.00 | 0.00 |
| ATOM | 648 | HE1 | MET | 42 | -9.658  | 17.563 | -4.923 | 1.00 | 0.00 |
| ATOM | 649 | HE2 | MET | 42 | -10.122 | 17.934 | -6.601 | 1.00 | 0.00 |
| ATOM | 650 | HE3 | MET | 42 | -11.323 | 18.071 | -5.294 | 1.00 | 0.00 |
| ATOM | 651 | C   | MET | 42 | -14.009 | 13.841 | -3.522 | 1.00 | 0.00 |
| ATOM | 652 | O   | MET | 42 | -15.105 | 13.836 | -4.055 | 1.00 | 0.00 |
| ATOM | 653 | N   | ARG | 43 | -13.179 | 12.780 | -3.504 | 1.00 | 0.00 |
| ATOM | 654 | H   | ARG | 43 | -12.239 | 12.911 | -3.159 | 1.00 | 0.00 |
| ATOM | 655 | CA  | ARG | 43 | -13.539 | 11.490 | -4.029 | 1.00 | 0.00 |
| ATOM | 656 | HA  | ARG | 43 | -13.677 | 11.557 | -5.109 | 1.00 | 0.00 |
| ATOM | 657 | CB  | ARG | 43 | -12.437 | 10.464 | -3.739 | 1.00 | 0.00 |
| ATOM | 658 | HB2 | ARG | 43 | -11.516 | 10.982 | -3.468 | 1.00 | 0.00 |
| ATOM | 659 | HB3 | ARG | 43 | -12.745 | 9.818  | -2.918 | 1.00 | 0.00 |

|      |     |      |     |    |         |        |        |      |      |
|------|-----|------|-----|----|---------|--------|--------|------|------|
| ATOM | 660 | CG   | ARG | 43 | -12.196 | 9.617  | -4.993 | 1.00 | 0.00 |
| ATOM | 661 | HG2  | ARG | 43 | -11.901 | 8.612  | -4.692 | 1.00 | 0.00 |
| ATOM | 662 | HG3  | ARG | 43 | -13.119 | 9.567  | -5.571 | 1.00 | 0.00 |
| ATOM | 663 | CD   | ARG | 43 | -11.087 | 10.239 | -5.854 | 1.00 | 0.00 |
| ATOM | 664 | HD2  | ARG | 43 | -11.123 | 9.812  | -6.857 | 1.00 | 0.00 |
| ATOM | 665 | HD3  | ARG | 43 | -11.236 | 11.318 | -5.914 | 1.00 | 0.00 |
| ATOM | 666 | NE   | ARG | 43 | -9.751  | 9.976  | -5.274 | 1.00 | 0.00 |
| ATOM | 667 | HE   | ARG | 43 | -9.691  | 9.196  | -4.637 | 1.00 | 0.00 |
| ATOM | 668 | CZ   | ARG | 43 | -8.643  | 10.626 | -5.580 | 1.00 | 0.00 |
| ATOM | 669 | NH1  | ARG | 43 | -8.660  | 11.618 | -6.429 | 1.00 | 0.00 |
| ATOM | 670 | HH11 | ARG | 43 | -9.530  | 11.896 | -6.860 | 1.00 | 0.00 |
| ATOM | 671 | HH12 | ARG | 43 | -7.802  | 12.104 | -6.651 | 1.00 | 0.00 |
| ATOM | 672 | NH2  | ARG | 43 | -7.518  | 10.332 | -4.972 | 1.00 | 0.00 |
| ATOM | 673 | HH21 | ARG | 43 | -7.502  | 9.607  | -4.270 | 1.00 | 0.00 |
| ATOM | 674 | HH22 | ARG | 43 | -6.673  | 10.833 | -5.210 | 1.00 | 0.00 |
| ATOM | 675 | C    | ARG | 43 | -14.880 | 11.045 | -3.466 | 1.00 | 0.00 |
| ATOM | 676 | O    | ARG | 43 | -15.123 | 11.155 | -2.272 | 1.00 | 0.00 |
| ATOM | 677 | N    | GLU | 44 | -15.671 | 10.421 | -4.301 | 1.00 | 0.00 |
| ATOM | 678 | H    | GLU | 44 | -15.408 | 10.340 | -5.273 | 1.00 | 0.00 |
| ATOM | 679 | CA   | GLU | 44 | -16.958 | 9.875  | -3.885 | 1.00 | 0.00 |
| ATOM | 680 | HA   | GLU | 44 | -17.175 | 10.171 | -2.859 | 1.00 | 0.00 |
| ATOM | 681 | CB   | GLU | 44 | -18.068 | 10.407 | -4.792 | 1.00 | 0.00 |

|      |     |     |     |    |         |        |        |      |      |
|------|-----|-----|-----|----|---------|--------|--------|------|------|
| ATOM | 682 | HB2 | GLU | 44 | -19.012 | 9.965  | -4.476 | 1.00 | 0.00 |
| ATOM | 683 | HB3 | GLU | 44 | -18.117 | 11.490 | -4.677 | 1.00 | 0.00 |
| ATOM | 684 | CG  | GLU | 44 | -17.809 | 10.060 | -6.272 | 1.00 | 0.00 |
| ATOM | 685 | HG2 | GLU | 44 | -17.642 | 10.958 | -6.868 | 1.00 | 0.00 |
| ATOM | 686 | HG3 | GLU | 44 | -16.906 | 9.450  | -6.275 | 1.00 | 0.00 |
| ATOM | 687 | CD  | GLU | 44 | -18.968 | 9.259  | -6.870 | 1.00 | 0.00 |
| ATOM | 688 | OE1 | GLU | 44 | -18.978 | 8.029  | -6.640 | 1.00 | 0.00 |
| ATOM | 689 | OE2 | GLU | 44 | -19.847 | 9.912  | -7.479 | 1.00 | 0.00 |
| ATOM | 690 | C   | GLU | 44 | -16.935 | 8.345  | -3.912 | 1.00 | 0.00 |
| ATOM | 691 | O   | GLU | 44 | -17.666 | 7.703  | -3.167 | 1.00 | 0.00 |
| ATOM | 692 | N   | GLU | 45 | -15.983 | 7.772  | -4.657 | 1.00 | 0.00 |
| ATOM | 693 | H   | GLU | 45 | -15.335 | 8.355  | -5.168 | 1.00 | 0.00 |
| ATOM | 694 | CA  | GLU | 45 | -15.876 | 6.339  | -4.803 | 1.00 | 0.00 |
| ATOM | 695 | HA  | GLU | 45 | -16.872 | 5.900  | -4.852 | 1.00 | 0.00 |
| ATOM | 696 | CB  | GLU | 45 | -15.117 | 5.978  | -6.089 | 1.00 | 0.00 |
| ATOM | 697 | HB2 | GLU | 45 | -14.590 | 6.861  | -6.451 | 1.00 | 0.00 |
| ATOM | 698 | HB3 | GLU | 45 | -14.397 | 5.191  | -5.869 | 1.00 | 0.00 |
| ATOM | 699 | CG  | GLU | 45 | -16.098 | 5.488  | -7.169 | 1.00 | 0.00 |
| ATOM | 700 | HG2 | GLU | 45 | -16.343 | 4.427  | -7.190 | 1.00 | 0.00 |
| ATOM | 701 | HG3 | GLU | 45 | -16.973 | 6.057  | -6.855 | 1.00 | 0.00 |
| ATOM | 702 | CD  | GLU | 45 | -15.672 | 5.940  | -8.567 | 1.00 | 0.00 |
| ATOM | 703 | OE1 | GLU | 45 | -15.759 | 7.157  | -8.839 | 1.00 | 0.00 |

|      |     |     |     |    |         |       |        |      |      |
|------|-----|-----|-----|----|---------|-------|--------|------|------|
| ATOM | 704 | OE2 | GLU | 45 | -15.045 | 5.105 | -9.262 | 1.00 | 0.00 |
| ATOM | 705 | C   | GLU | 45 | -15.177 | 5.797 | -3.567 | 1.00 | 0.00 |
| ATOM | 706 | O   | GLU | 45 | -13.999 | 6.101 | -3.306 | 1.00 | 0.00 |
| ATOM | 707 | N   | ASP | 46 | -15.894 | 4.964 | -2.821 | 1.00 | 0.00 |
| ATOM | 708 | H   | ASP | 46 | -16.839 | 4.741 | -3.098 | 1.00 | 0.00 |
| ATOM | 709 | CA  | ASP | 46 | -15.371 | 4.361 | -1.614 | 1.00 | 0.00 |
| ATOM | 710 | HA  | ASP | 46 | -14.970 | 5.137 | -0.962 | 1.00 | 0.00 |
| ATOM | 711 | CB  | ASP | 46 | -16.472 | 3.608 | -0.861 | 1.00 | 0.00 |
| ATOM | 712 | HB2 | ASP | 46 | -17.347 | 4.241 | -1.008 | 1.00 | 0.00 |
| ATOM | 713 | HB3 | ASP | 46 | -16.660 | 2.624 | -1.290 | 1.00 | 0.00 |
| ATOM | 714 | CG  | ASP | 46 | -16.190 | 3.467 | 0.638  | 1.00 | 0.00 |
| ATOM | 715 | OD1 | ASP | 46 | -15.163 | 4.022 | 1.107  | 1.00 | 0.00 |
| ATOM | 716 | OD2 | ASP | 46 | -16.936 | 2.717 | 1.298  | 1.00 | 0.00 |
| ATOM | 717 | C   | ASP | 46 | -14.261 | 3.384 | -1.987 | 1.00 | 0.00 |
| ATOM | 718 | O   | ASP | 46 | -14.326 | 2.643 | -2.980 | 1.00 | 0.00 |
| ATOM | 719 | N   | HID | 47 | -13.183 | 3.365 | -1.215 | 1.00 | 0.00 |
| ATOM | 720 | H   | HID | 47 | -13.101 | 4.025 | -0.455 | 1.00 | 0.00 |
| ATOM | 721 | CA  | HID | 47 | -12.072 | 2.461 | -1.465 | 1.00 | 0.00 |
| ATOM | 722 | HA  | HID | 47 | -12.311 | 1.790 | -2.290 | 1.00 | 0.00 |
| ATOM | 723 | CB  | HID | 47 | -10.830 | 3.263 | -1.835 | 1.00 | 0.00 |
| ATOM | 724 | HB2 | HID | 47 | -10.652 | 4.065 | -1.118 | 1.00 | 0.00 |
| ATOM | 725 | HB3 | HID | 47 | -9.953  | 2.618 | -1.884 | 1.00 | 0.00 |

|      |     |     |     |    |         |        |        |      |      |
|------|-----|-----|-----|----|---------|--------|--------|------|------|
| ATOM | 726 | CG  | HID | 47 | -10.960 | 3.918  | -3.192 | 1.00 | 0.00 |
| ATOM | 727 | ND1 | HID | 47 | -11.939 | 3.618  | -4.131 | 1.00 | 0.00 |
| ATOM | 728 | HD1 | HID | 47 | -12.662 | 2.920  | -4.034 | 1.00 | 0.00 |
| ATOM | 729 | CE1 | HID | 47 | -11.754 | 4.422  | -5.195 | 1.00 | 0.00 |
| ATOM | 730 | HE1 | HID | 47 | -12.436 | 4.376  | -6.045 | 1.00 | 0.00 |
| ATOM | 731 | NE2 | HID | 47 | -10.660 | 5.194  | -4.973 | 1.00 | 0.00 |
| ATOM | 732 | CD2 | HID | 47 | -10.150 | 4.895  | -3.718 | 1.00 | 0.00 |
| ATOM | 733 | HD2 | HID | 47 | -9.267  | 5.418  | -3.350 | 1.00 | 0.00 |
| ATOM | 734 | C   | HID | 47 | -11.854 | 1.613  | -0.248 | 1.00 | 0.00 |
| ATOM | 735 | O   | HID | 47 | -11.631 | 2.168  | 0.818  | 1.00 | 0.00 |
| ATOM | 736 | N   | LYS | 48 | -11.838 | 0.292  | -0.448 | 1.00 | 0.00 |
| ATOM | 737 | H   | LYS | 48 | -12.019 | -0.044 | -1.383 | 1.00 | 0.00 |
| ATOM | 738 | CA  | LYS | 48 | -11.631 | -0.687 | 0.611  | 1.00 | 0.00 |
| ATOM | 739 | HA  | LYS | 48 | -10.598 | -0.648 | 0.958  | 1.00 | 0.00 |
| ATOM | 740 | CB  | LYS | 48 | -12.556 | -0.386 | 1.793  | 1.00 | 0.00 |
| ATOM | 741 | HB2 | LYS | 48 | -13.132 | 0.513  | 1.571  | 1.00 | 0.00 |
| ATOM | 742 | HB3 | LYS | 48 | -13.235 | -1.227 | 1.933  | 1.00 | 0.00 |
| ATOM | 743 | CG  | LYS | 48 | -11.741 | -0.167 | 3.074  | 1.00 | 0.00 |
| ATOM | 744 | HG2 | LYS | 48 | -11.090 | -1.028 | 3.224  | 1.00 | 0.00 |
| ATOM | 745 | HG3 | LYS | 48 | -11.133 | 0.730  | 2.950  | 1.00 | 0.00 |
| ATOM | 746 | CD  | LYS | 48 | -12.657 | 0.000  | 4.293  | 1.00 | 0.00 |
| ATOM | 747 | HD2 | LYS | 48 | -12.069 | 0.390  | 5.124  | 1.00 | 0.00 |

|      |     |         |    |         |        |        |      |      |
|------|-----|---------|----|---------|--------|--------|------|------|
| ATOM | 748 | HD3 LYS | 48 | -13.448 | 0.708  | 4.044  | 1.00 | 0.00 |
| ATOM | 749 | CE LYS  | 48 | -13.281 | -1.346 | 4.694  | 1.00 | 0.00 |
| ATOM | 750 | HE2 LYS | 48 | -12.543 | -2.134 | 4.542  | 1.00 | 0.00 |
| ATOM | 751 | HE3 LYS | 48 | -13.557 | -1.305 | 5.747  | 1.00 | 0.00 |
| ATOM | 752 | NZ LYS  | 48 | -14.488 | -1.634 | 3.877  | 1.00 | 0.00 |
| ATOM | 753 | HZ1 LYS | 48 | -14.232 | -1.672 | 2.900  | 1.00 | 0.00 |
| ATOM | 754 | HZ2 LYS | 48 | -14.880 | -2.521 | 4.157  | 1.00 | 0.00 |
| ATOM | 755 | HZ3 LYS | 48 | -15.172 | -0.904 | 4.017  | 1.00 | 0.00 |
| ATOM | 756 | C LYS   | 48 | -11.863 | -2.097 | 0.096  | 1.00 | 0.00 |
| ATOM | 757 | O LYS   | 48 | -11.154 | -3.020 | 0.457  | 1.00 | 0.00 |
| ATOM | 758 | N GLN   | 49 | -12.783 | -2.233 | -0.854 | 1.00 | 0.00 |
| ATOM | 759 | H GLN   | 49 | -13.299 | -1.424 | -1.173 | 1.00 | 0.00 |
| ATOM | 760 | CA GLN  | 49 | -13.063 | -3.503 | -1.464 | 1.00 | 0.00 |
| ATOM | 761 | HA GLN  | 49 | -12.859 | -4.299 | -0.749 | 1.00 | 0.00 |
| ATOM | 762 | CB GLN  | 49 | -14.517 | -3.602 | -1.901 | 1.00 | 0.00 |
| ATOM | 763 | HB2 GLN | 49 | -14.972 | -2.611 | -1.876 | 1.00 | 0.00 |
| ATOM | 764 | HB3 GLN | 49 | -14.565 | -3.997 | -2.916 | 1.00 | 0.00 |
| ATOM | 765 | CG GLN  | 49 | -15.273 | -4.533 | -0.956 | 1.00 | 0.00 |
| ATOM | 766 | HG2 GLN | 49 | -14.790 | -5.509 | -0.986 | 1.00 | 0.00 |
| ATOM | 767 | HG3 GLN | 49 | -15.236 | -4.140 | 0.060  | 1.00 | 0.00 |
| ATOM | 768 | CD GLN  | 49 | -16.729 | -4.698 | -1.360 | 1.00 | 0.00 |
| ATOM | 769 | OE1 GLN | 49 | -17.169 | -4.287 | -2.414 | 1.00 | 0.00 |

|      |     |      |     |    |         |        |        |      |      |
|------|-----|------|-----|----|---------|--------|--------|------|------|
| ATOM | 770 | NE2  | GLN | 49 | -17.511 | -5.296 | -0.492 | 1.00 | 0.00 |
| ATOM | 771 | HE21 | GLN | 49 | -18.488 | -5.432 | -0.708 | 1.00 | 0.00 |
| ATOM | 772 | HE22 | GLN | 49 | -17.132 | -5.616 | 0.387  | 1.00 | 0.00 |
| ATOM | 773 | C    | GLN | 49 | -12.200 | -3.661 | -2.677 | 1.00 | 0.00 |
| ATOM | 774 | O    | GLN | 49 | -11.850 | -4.773 | -2.931 | 1.00 | 0.00 |
| ATOM | 775 | N    | LEU | 50 | -11.732 | -2.611 | -3.345 | 1.00 | 0.00 |
| ATOM | 776 | H    | LEU | 50 | -12.050 | -1.695 | -3.062 | 1.00 | 0.00 |
| ATOM | 777 | CA   | LEU | 50 | -10.837 | -2.706 | -4.486 | 1.00 | 0.00 |
| ATOM | 778 | HA   | LEU | 50 | -11.251 | -3.364 | -5.250 | 1.00 | 0.00 |
| ATOM | 779 | CB   | LEU | 50 | -10.666 | -1.301 | -5.088 | 1.00 | 0.00 |
| ATOM | 780 | HB2  | LEU | 50 | -10.779 | -0.608 | -4.254 | 1.00 | 0.00 |
| ATOM | 781 | HB3  | LEU | 50 | -9.664  | -1.203 | -5.508 | 1.00 | 0.00 |
| ATOM | 782 | CG   | LEU | 50 | -11.709 | -0.974 | -6.171 | 1.00 | 0.00 |
| ATOM | 783 | HG   | LEU | 50 | -12.648 | -1.474 | -5.934 | 1.00 | 0.00 |
| ATOM | 784 | CD1  | LEU | 50 | -11.937 | 0.541  | -6.224 | 1.00 | 0.00 |
| ATOM | 785 | HD11 | LEU | 50 | -10.999 | 1.042  | -6.462 | 1.00 | 0.00 |
| ATOM | 786 | HD12 | LEU | 50 | -12.676 | 0.772  | -6.992 | 1.00 | 0.00 |
| ATOM | 787 | HD13 | LEU | 50 | -12.299 | 0.889  | -5.257 | 1.00 | 0.00 |
| ATOM | 788 | CD2  | LEU | 50 | -11.259 | -1.503 | -7.535 | 1.00 | 0.00 |
| ATOM | 789 | HD21 | LEU | 50 | -11.134 | -2.584 | -7.483 | 1.00 | 0.00 |
| ATOM | 790 | HD22 | LEU | 50 | -12.011 | -1.260 | -8.286 | 1.00 | 0.00 |
| ATOM | 791 | HD23 | LEU | 50 | -10.311 | -1.041 | -7.810 | 1.00 | 0.00 |



|      |     |     |     |    |         |        |        |      |      |
|------|-----|-----|-----|----|---------|--------|--------|------|------|
| ATOM | 792 | C   | LEU | 50 | -9.498  | -3.306 | -4.054 | 1.00 | 0.00 |
| ATOM | 793 | O   | LEU | 50 | -8.814  | -3.900 | -4.866 | 1.00 | 0.00 |
| ATOM | 794 | N   | CYX | 51 | -9.159  | -3.203 | -2.766 | 1.00 | 0.00 |
| ATOM | 795 | H   | CYX | 51 | -9.734  | -2.642 | -2.154 | 1.00 | 0.00 |
| ATOM | 796 | CA  | CYX | 51 | -7.972  | -3.813 | -2.221 | 1.00 | 0.00 |
| ATOM | 797 | HA  | CYX | 51 | -7.199  | -3.874 | -2.987 | 1.00 | 0.00 |
| ATOM | 798 | CB  | CYX | 51 | -7.446  | -2.986 | -1.068 | 1.00 | 0.00 |
| ATOM | 799 | HB2 | CYX | 51 | -6.360  | -3.067 | -1.028 | 1.00 | 0.00 |
| ATOM | 800 | HB3 | CYX | 51 | -7.726  | -1.942 | -1.212 | 1.00 | 0.00 |
| ATOM | 801 | SG  | CYX | 51 | -8.002  | -3.369 | 0.624  | 1.00 | 0.00 |
| ATOM | 802 | C   | CYX | 51 | -8.265  | -5.221 | -1.783 | 1.00 | 0.00 |
| ATOM | 803 | O   | CYX | 51 | -7.557  | -6.100 | -2.230 | 1.00 | 0.00 |
| ATOM | 804 | N   | CYX | 52 | -9.371  | -5.444 | -1.061 | 1.00 | 0.00 |
| ATOM | 805 | H   | CYX | 52 | -9.907  | -4.651 | -0.738 | 1.00 | 0.00 |
| ATOM | 806 | CA  | CYX | 52 | -9.780  | -6.773 | -0.637 | 1.00 | 0.00 |
| ATOM | 807 | HA  | CYX | 52 | -8.919  | -7.323 | -0.257 | 1.00 | 0.00 |
| ATOM | 808 | CB  | CYX | 52 | -10.831 | -6.674 | 0.477  | 1.00 | 0.00 |
| ATOM | 809 | HB2 | CYX | 52 | -11.421 | -5.767 | 0.341  | 1.00 | 0.00 |
| ATOM | 810 | HB3 | CYX | 52 | -11.487 | -7.543 | 0.436  | 1.00 | 0.00 |
| ATOM | 811 | SG  | CYX | 52 | -10.083 | -6.657 | 2.138  | 1.00 | 0.00 |
| ATOM | 812 | C   | CYX | 52 | -10.276 | -7.584 | -1.839 | 1.00 | 0.00 |
| ATOM | 813 | O   | CYX | 52 | -10.610 | -8.751 | -1.697 | 1.00 | 0.00 |

|      |     |     |     |    |         |        |        |      |      |
|------|-----|-----|-----|----|---------|--------|--------|------|------|
| ATOM | 814 | N   | MET | 53 | -10.335 | -6.971 | -3.020 | 1.00 | 0.00 |
| ATOM | 815 | H   | MET | 53 | -10.012 | -6.014 | -3.056 | 1.00 | 0.00 |
| ATOM | 816 | CA  | MET | 53 | -10.836 | -7.567 | -4.229 | 1.00 | 0.00 |
| ATOM | 817 | HA  | MET | 53 | -11.494 | -8.398 | -3.979 | 1.00 | 0.00 |
| ATOM | 818 | CB  | MET | 53 | -11.626 | -6.551 | -5.061 | 1.00 | 0.00 |
| ATOM | 819 | HB2 | MET | 53 | -12.587 | -6.378 | -4.577 | 1.00 | 0.00 |
| ATOM | 820 | HB3 | MET | 53 | -11.063 | -5.617 | -5.094 | 1.00 | 0.00 |
| ATOM | 821 | CG  | MET | 53 | -11.856 | -7.052 | -6.476 | 1.00 | 0.00 |
| ATOM | 822 | HG2 | MET | 53 | -11.617 | -8.114 | -6.524 | 1.00 | 0.00 |
| ATOM | 823 | HG3 | MET | 53 | -12.902 | -6.902 | -6.744 | 1.00 | 0.00 |
| ATOM | 824 | SD  | MET | 53 | -10.810 | -6.156 | -7.646 | 1.00 | 0.00 |
| ATOM | 825 | CE  | MET | 53 | -10.486 | -7.496 | -8.811 | 1.00 | 0.00 |
| ATOM | 826 | HE1 | MET | 53 | -11.428 | -7.851 | -9.228 | 1.00 | 0.00 |
| ATOM | 827 | HE2 | MET | 53 | -9.847  | -7.131 | -9.616 | 1.00 | 0.00 |
| ATOM | 828 | HE3 | MET | 53 | -9.986  | -8.315 | -8.294 | 1.00 | 0.00 |
| ATOM | 829 | C   | MET | 53 | -9.646  | -8.072 | -5.008 | 1.00 | 0.00 |
| ATOM | 830 | O   | MET | 53 | -9.634  | -9.226 | -5.402 | 1.00 | 0.00 |
| ATOM | 831 | N   | GLN | 54 | -8.683  | -7.196 | -5.286 | 1.00 | 0.00 |
| ATOM | 832 | H   | GLN | 54 | -8.739  | -6.242 | -4.958 | 1.00 | 0.00 |
| ATOM | 833 | CA  | GLN | 54 | -7.524  | -7.588 | -6.058 | 1.00 | 0.00 |
| ATOM | 834 | HA  | GLN | 54 | -7.840  | -8.126 | -6.952 | 1.00 | 0.00 |
| ATOM | 835 | CB  | GLN | 54 | -6.734  | -6.371 | -6.482 | 1.00 | 0.00 |

|      |     |      |     |    |        |        |        |      |      |
|------|-----|------|-----|----|--------|--------|--------|------|------|
| ATOM | 836 | HB2  | GLN | 54 | -6.821 | -5.620 | -5.697 | 1.00 | 0.00 |
| ATOM | 837 | HB3  | GLN | 54 | -5.690 | -6.665 | -6.588 | 1.00 | 0.00 |
| ATOM | 838 | CG   | GLN | 54 | -7.230 | -5.791 | -7.792 | 1.00 | 0.00 |
| ATOM | 839 | HG2  | GLN | 54 | -6.482 | -5.978 | -8.563 | 1.00 | 0.00 |
| ATOM | 840 | HG3  | GLN | 54 | -8.155 | -6.306 | -8.051 | 1.00 | 0.00 |
| ATOM | 841 | CD   | GLN | 54 | -7.506 | -4.296 | -7.736 | 1.00 | 0.00 |
| ATOM | 842 | OE1  | GLN | 54 | -6.814 | -3.485 | -7.161 | 1.00 | 0.00 |
| ATOM | 843 | NE2  | GLN | 54 | -8.558 | -3.852 | -8.365 | 1.00 | 0.00 |
| ATOM | 844 | HE21 | GLN | 54 | -8.773 | -2.865 | -8.350 | 1.00 | 0.00 |
| ATOM | 845 | HE22 | GLN | 54 | -9.153 | -4.496 | -8.865 | 1.00 | 0.00 |
| ATOM | 846 | C    | GLN | 54 | -6.623 | -8.470 | -5.233 | 1.00 | 0.00 |
| ATOM | 847 | O    | GLN | 54 | -6.009 | -9.352 | -5.802 | 1.00 | 0.00 |
| ATOM | 848 | N    | LEU | 55 | -6.579 | -8.296 | -3.910 | 1.00 | 0.00 |
| ATOM | 849 | H    | LEU | 55 | -7.133 | -7.566 | -3.485 | 1.00 | 0.00 |
| ATOM | 850 | CA   | LEU | 55 | -5.745 | -9.119 | -3.050 | 1.00 | 0.00 |
| ATOM | 851 | HA   | LEU | 55 | -4.691 | -8.986 | -3.297 | 1.00 | 0.00 |
| ATOM | 852 | CB   | LEU | 55 | -5.962 | -8.699 | -1.606 | 1.00 | 0.00 |
| ATOM | 853 | HB2  | LEU | 55 | -6.935 | -8.210 | -1.645 | 1.00 | 0.00 |
| ATOM | 854 | HB3  | LEU | 55 | -6.023 | -9.579 | -0.966 | 1.00 | 0.00 |
| ATOM | 855 | CG   | LEU | 55 | -4.916 | -7.718 | -1.033 | 1.00 | 0.00 |
| ATOM | 856 | HG   | LEU | 55 | -4.366 | -7.293 | -1.874 | 1.00 | 0.00 |
| ATOM | 857 | CD1  | LEU | 55 | -5.541 | -6.583 | -0.204 | 1.00 | 0.00 |

|      |     |      |     |    |         |         |        |      |      |
|------|-----|------|-----|----|---------|---------|--------|------|------|
| ATOM | 858 | HD11 | LEU | 55 | -6.090  | -7.006  | 0.636  | 1.00 | 0.00 |
| ATOM | 859 | HD12 | LEU | 55 | -4.753  | -5.929  | 0.169  | 1.00 | 0.00 |
| ATOM | 860 | HD13 | LEU | 55 | -6.223  | -6.008  | -0.831 | 1.00 | 0.00 |
| ATOM | 861 | CD2  | LEU | 55 | -3.858  | -8.461  | -0.212 | 1.00 | 0.00 |
| ATOM | 862 | HD21 | LEU | 55 | -3.347  | -9.184  | -0.847 | 1.00 | 0.00 |
| ATOM | 863 | HD22 | LEU | 55 | -3.134  | -7.746  | 0.179  | 1.00 | 0.00 |
| ATOM | 864 | HD23 | LEU | 55 | -4.339  | -8.981  | 0.616  | 1.00 | 0.00 |
| ATOM | 865 | C    | LEU | 55 | -6.120  | -10.581 | -3.236 | 1.00 | 0.00 |
| ATOM | 866 | O    | LEU | 55 | -5.271  | -11.437 | -3.090 | 1.00 | 0.00 |
| ATOM | 867 | N    | LYS | 56 | -7.369  | -10.859 | -3.611 | 1.00 | 0.00 |
| ATOM | 868 | H    | LYS | 56 | -8.075  | -10.137 | -3.572 | 1.00 | 0.00 |
| ATOM | 869 | CA   | LYS | 56 | -7.777  | -12.197 | -3.973 | 1.00 | 0.00 |
| ATOM | 870 | HA   | LYS | 56 | -7.459  | -12.914 | -3.217 | 1.00 | 0.00 |
| ATOM | 871 | CB   | LYS | 56 | -9.300  | -12.234 | -4.071 | 1.00 | 0.00 |
| ATOM | 872 | HB2  | LYS | 56 | -9.722  | -11.986 | -3.098 | 1.00 | 0.00 |
| ATOM | 873 | HB3  | LYS | 56 | -9.624  | -11.496 | -4.806 | 1.00 | 0.00 |
| ATOM | 874 | CG   | LYS | 56 | -9.782  | -13.624 | -4.497 | 1.00 | 0.00 |
| ATOM | 875 | HG2  | LYS | 56 | -10.085 | -13.586 | -5.544 | 1.00 | 0.00 |
| ATOM | 876 | HG3  | LYS | 56 | -8.961  | -14.332 | -4.382 | 1.00 | 0.00 |
| ATOM | 877 | CD   | LYS | 56 | -10.966 | -14.073 | -3.640 | 1.00 | 0.00 |
| ATOM | 878 | HD2  | LYS | 56 | -10.590 | -14.538 | -2.730 | 1.00 | 0.00 |
| ATOM | 879 | HD3  | LYS | 56 | -11.568 | -13.202 | -3.381 | 1.00 | 0.00 |

|      |     |      |     |    |         |         |         |      |      |
|------|-----|------|-----|----|---------|---------|---------|------|------|
| ATOM | 880 | CE   | LYS | 56 | -11.829 | -15.079 | -4.409  | 1.00 | 0.00 |
| ATOM | 881 | HE2  | LYS | 56 | -11.782 | -14.851 | -5.474  | 1.00 | 0.00 |
| ATOM | 882 | HE3  | LYS | 56 | -11.447 | -16.085 | -4.236  | 1.00 | 0.00 |
| ATOM | 883 | NZ   | LYS | 56 | -13.236 | -14.999 | -3.949  | 1.00 | 0.00 |
| ATOM | 884 | HZ1  | LYS | 56 | -13.590 | -14.067 | -4.110  | 1.00 | 0.00 |
| ATOM | 885 | HZ2  | LYS | 56 | -13.796 | -15.665 | -4.462  | 1.00 | 0.00 |
| ATOM | 886 | HZ3  | LYS | 56 | -13.280 | -15.210 | -2.963  | 1.00 | 0.00 |
| ATOM | 887 | C    | LYS | 56 | -7.099  | -12.686 | -5.250  | 1.00 | 0.00 |
| ATOM | 888 | O    | LYS | 56 | -6.713  | -13.841 | -5.302  | 1.00 | 0.00 |
| ATOM | 889 | N    | ASN | 57 | -7.063  | -11.849 | -6.287  | 1.00 | 0.00 |
| ATOM | 890 | H    | ASN | 57 | -7.587  | -10.986 | -6.256  | 1.00 | 0.00 |
| ATOM | 891 | CA   | ASN | 57 | -6.319  | -12.157 | -7.491  | 1.00 | 0.00 |
| ATOM | 892 | HA   | ASN | 57 | -6.752  | -13.029 | -7.980  | 1.00 | 0.00 |
| ATOM | 893 | CB   | ASN | 57 | -6.365  | -10.969 | -8.473  | 1.00 | 0.00 |
| ATOM | 894 | HB2  | ASN | 57 | -6.669  | -10.049 | -7.974  | 1.00 | 0.00 |
| ATOM | 895 | HB3  | ASN | 57 | -5.348  | -10.858 | -8.849  | 1.00 | 0.00 |
| ATOM | 896 | CG   | ASN | 57 | -7.288  | -11.210 | -9.643  | 1.00 | 0.00 |
| ATOM | 897 | OD1  | ASN | 57 | -7.701  | -12.307 | -9.969  | 1.00 | 0.00 |
| ATOM | 898 | ND2  | ASN | 57 | -7.704  | -10.139 | -10.279 | 1.00 | 0.00 |
| ATOM | 899 | HD21 | ASN | 57 | -8.324  | -10.234 | -11.071 | 1.00 | 0.00 |
| ATOM | 900 | HD22 | ASN | 57 | -7.402  | -9.224  | -9.974  | 1.00 | 0.00 |
| ATOM | 901 | C    | ASN | 57 | -4.856  | -12.506 | -7.216  | 1.00 | 0.00 |

|      |     |      |     |    |        |         |        |      |      |
|------|-----|------|-----|----|--------|---------|--------|------|------|
| ATOM | 902 | O    | ASN | 57 | -4.255 | -13.200 | -8.028 | 1.00 | 0.00 |
| ATOM | 903 | N    | LEU | 58 | -4.279 | -11.893 | -6.176 | 1.00 | 0.00 |
| ATOM | 904 | H    | LEU | 58 | -4.760 | -11.134 | -5.714 | 1.00 | 0.00 |
| ATOM | 905 | CA   | LEU | 58 | -2.929 | -12.196 | -5.767 | 1.00 | 0.00 |
| ATOM | 906 | HA   | LEU | 58 | -2.252 | -12.139 | -6.620 | 1.00 | 0.00 |
| ATOM | 907 | CB   | LEU | 58 | -2.475 | -11.174 | -4.711 | 1.00 | 0.00 |
| ATOM | 908 | HB2  | LEU | 58 | -3.366 | -10.913 | -4.140 | 1.00 | 0.00 |
| ATOM | 909 | HB3  | LEU | 58 | -1.757 | -11.670 | -4.058 | 1.00 | 0.00 |
| ATOM | 910 | CG   | LEU | 58 | -1.852 | -9.912  | -5.280 | 1.00 | 0.00 |
| ATOM | 911 | HG   | LEU | 58 | -2.606 | -9.363  | -5.845 | 1.00 | 0.00 |
| ATOM | 912 | CD1  | LEU | 58 | -1.321 | -9.028  | -4.145 | 1.00 | 0.00 |
| ATOM | 913 | HD11 | LEU | 58 | -0.566 | -9.575  | -3.580 | 1.00 | 0.00 |
| ATOM | 914 | HD12 | LEU | 58 | -0.876 | -8.125  | -4.565 | 1.00 | 0.00 |
| ATOM | 915 | HD13 | LEU | 58 | -2.142 | -8.753  | -3.483 | 1.00 | 0.00 |
| ATOM | 916 | CD2  | LEU | 58 | -0.728 | -10.257 | -6.212 | 1.00 | 0.00 |
| ATOM | 917 | HD21 | LEU | 58 | -1.109 | -10.865 | -7.033 | 1.00 | 0.00 |
| ATOM | 918 | HD22 | LEU | 58 | -0.292 | -9.341  | -6.612 | 1.00 | 0.00 |
| ATOM | 919 | HD23 | LEU | 58 | 0.035  | -10.815 | -5.671 | 1.00 | 0.00 |
| ATOM | 920 | C    | LEU | 58 | -2.795 | -13.650 | -5.295 | 1.00 | 0.00 |
| ATOM | 921 | O    | LEU | 58 | -3.705 | -14.469 | -5.391 | 1.00 | 0.00 |
| ATOM | 922 | N    | ASP | 59 | -1.620 | -13.980 | -4.782 | 1.00 | 0.00 |
| ATOM | 923 | H    | ASP | 59 | -0.874 | -13.300 | -4.731 | 1.00 | 0.00 |

|      |     |     |     |    |        |         |        |      |      |
|------|-----|-----|-----|----|--------|---------|--------|------|------|
| ATOM | 924 | CA  | ASP | 59 | -1.368 | -15.311 | -4.286 | 1.00 | 0.00 |
| ATOM | 925 | HA  | ASP | 59 | -2.045 | -16.019 | -4.762 | 1.00 | 0.00 |
| ATOM | 926 | CB  | ASP | 59 | 0.067  | -15.725 | -4.596 | 1.00 | 0.00 |
| ATOM | 927 | HB2 | ASP | 59 | 0.608  | -14.964 | -4.034 | 1.00 | 0.00 |
| ATOM | 928 | HB3 | ASP | 59 | 0.348  | -16.713 | -4.233 | 1.00 | 0.00 |
| ATOM | 929 | CG  | ASP | 59 | 0.418  | -15.609 | -6.076 | 1.00 | 0.00 |
| ATOM | 930 | OD1 | ASP | 59 | -0.343 | -16.157 | -6.892 | 1.00 | 0.00 |
| ATOM | 931 | OD2 | ASP | 59 | 1.541  | -15.129 | -6.335 | 1.00 | 0.00 |
| ATOM | 932 | C   | ASP | 59 | -1.582 | -15.338 | -2.786 | 1.00 | 0.00 |
| ATOM | 933 | O   | ASP | 59 | -1.252 | -14.374 | -2.092 | 1.00 | 0.00 |
| ATOM | 934 | N   | GLU | 60 | -1.824 | -16.529 | -2.243 | 1.00 | 0.00 |
| ATOM | 935 | H   | GLU | 60 | -1.893 | -17.345 | -2.834 | 1.00 | 0.00 |
| ATOM | 936 | CA  | GLU | 60 | -2.022 | -16.696 | -0.803 | 1.00 | 0.00 |
| ATOM | 937 | HA  | GLU | 60 | -2.685 | -15.916 | -0.429 | 1.00 | 0.00 |
| ATOM | 938 | CB  | GLU | 60 | -2.652 | -18.062 | -0.502 | 1.00 | 0.00 |
| ATOM | 939 | HB2 | GLU | 60 | -3.005 | -18.505 | -1.433 | 1.00 | 0.00 |
| ATOM | 940 | HB3 | GLU | 60 | -1.900 | -18.711 | -0.053 | 1.00 | 0.00 |
| ATOM | 941 | CG  | GLU | 60 | -3.831 | -17.899 | 0.466  | 1.00 | 0.00 |
| ATOM | 942 | HG2 | GLU | 60 | -3.549 | -17.128 | 1.184  | 1.00 | 0.00 |
| ATOM | 943 | HG3 | GLU | 60 | -4.726 | -17.584 | -0.071 | 1.00 | 0.00 |
| ATOM | 944 | CD  | GLU | 60 | -4.114 | -19.210 | 1.208  | 1.00 | 0.00 |
| ATOM | 945 | OE1 | GLU | 60 | -3.501 | -19.402 | 2.283  | 1.00 | 0.00 |

|      |     |     |     |    |        |         |        |      |      |
|------|-----|-----|-----|----|--------|---------|--------|------|------|
| ATOM | 946 | OE2 | GLU | 60 | -4.903 | -20.015 | 0.669  | 1.00 | 0.00 |
| ATOM | 947 | C   | GLU | 60 | -0.688 | -16.577 | -0.066 | 1.00 | 0.00 |
| ATOM | 948 | O   | GLU | 60 | -0.625 | -16.232 | 1.109  | 1.00 | 0.00 |
| ATOM | 949 | N   | LYS | 61 | 0.412  | -16.822 | -0.786 | 1.00 | 0.00 |
| ATOM | 950 | H   | LYS | 61 | 0.318  | -17.199 | -1.718 | 1.00 | 0.00 |
| ATOM | 951 | CA  | LYS | 61 | 1.737  | -16.653 | -0.248 | 1.00 | 0.00 |
| ATOM | 952 | HA  | LYS | 61 | 1.726  | -16.771 | 0.835  | 1.00 | 0.00 |
| ATOM | 953 | CB  | LYS | 61 | 2.663  | -17.713 | -0.846 | 1.00 | 0.00 |
| ATOM | 954 | HB2 | LYS | 61 | 3.569  | -17.754 | -0.241 | 1.00 | 0.00 |
| ATOM | 955 | HB3 | LYS | 61 | 2.153  | -18.675 | -0.802 | 1.00 | 0.00 |
| ATOM | 956 | CG  | LYS | 61 | 3.035  | -17.398 | -2.301 | 1.00 | 0.00 |
| ATOM | 957 | HG2 | LYS | 61 | 2.123  | -17.189 | -2.861 | 1.00 | 0.00 |
| ATOM | 958 | HG3 | LYS | 61 | 3.680  | -16.519 | -2.318 | 1.00 | 0.00 |
| ATOM | 959 | CD  | LYS | 61 | 3.768  | -18.580 | -2.943 | 1.00 | 0.00 |
| ATOM | 960 | HD2 | LYS | 61 | 4.696  | -18.221 | -3.389 | 1.00 | 0.00 |
| ATOM | 961 | HD3 | LYS | 61 | 3.996  | -19.316 | -2.173 | 1.00 | 0.00 |
| ATOM | 962 | CE  | LYS | 61 | 2.897  | -19.228 | -4.027 | 1.00 | 0.00 |
| ATOM | 963 | HE2 | LYS | 61 | 2.240  | -18.469 | -4.453 | 1.00 | 0.00 |
| ATOM | 964 | HE3 | LYS | 61 | 3.544  | -19.627 | -4.809 | 1.00 | 0.00 |
| ATOM | 965 | NZ  | LYS | 61 | 2.079  | -20.325 | -3.453 | 1.00 | 0.00 |
| ATOM | 966 | HZ1 | LYS | 61 | 1.480  | -19.954 | -2.730 | 1.00 | 0.00 |
| ATOM | 967 | HZ2 | LYS | 61 | 1.513  | -20.738 | -4.181 | 1.00 | 0.00 |



|      |     |     |     |    |        |         |        |      |      |
|------|-----|-----|-----|----|--------|---------|--------|------|------|
| ATOM | 968 | HZ3 | LYS | 61 | 2.688  | -21.028 | -3.059 | 1.00 | 0.00 |
| ATOM | 969 | C   | LYS | 61 | 2.224  | -15.249 | -0.496 | 1.00 | 0.00 |
| ATOM | 970 | O   | LYS | 61 | 3.290  | -14.956 | -0.010 | 1.00 | 0.00 |
| ATOM | 971 | N   | CYX | 62 | 1.542  | -14.435 | -1.295 | 1.00 | 0.00 |
| ATOM | 972 | H   | CYX | 62 | 0.758  | -14.829 | -1.795 | 1.00 | 0.00 |
| ATOM | 973 | CA  | CYX | 62 | 1.874  | -13.048 | -1.527 | 1.00 | 0.00 |
| ATOM | 974 | HA  | CYX | 62 | 2.903  | -12.846 | -1.231 | 1.00 | 0.00 |
| ATOM | 975 | CB  | CYX | 62 | 1.728  | -12.746 | -3.004 | 1.00 | 0.00 |
| ATOM | 976 | HB2 | CYX | 62 | 0.777  | -13.139 | -3.364 | 1.00 | 0.00 |
| ATOM | 977 | HB3 | CYX | 62 | 1.757  | -11.667 | -3.160 | 1.00 | 0.00 |
| ATOM | 978 | SG  | CYX | 62 | 3.022  | -13.494 | -4.031 | 1.00 | 0.00 |
| ATOM | 979 | C   | CYX | 62 | 0.965  | -12.154 | -0.681 | 1.00 | 0.00 |
| ATOM | 980 | O   | CYX | 62 | 1.277  | -11.002 | -0.408 | 1.00 | 0.00 |
| ATOM | 981 | N   | MET | 63 | -0.089 | -12.692 | -0.102 | 1.00 | 0.00 |
| ATOM | 982 | H   | MET | 63 | -0.284 | -13.671 | -0.255 | 1.00 | 0.00 |
| ATOM | 983 | CA  | MET | 63 | -1.000 | -11.934 | 0.711  | 1.00 | 0.00 |
| ATOM | 984 | HA  | MET | 63 | -1.091 | -10.913 | 0.340  | 1.00 | 0.00 |
| ATOM | 985 | CB  | MET | 63 | -2.358 | -12.593 | 0.651  | 1.00 | 0.00 |
| ATOM | 986 | HB2 | MET | 63 | -2.216 | -13.665 | 0.787  | 1.00 | 0.00 |
| ATOM | 987 | HB3 | MET | 63 | -2.957 | -12.199 | 1.471  | 1.00 | 0.00 |
| ATOM | 988 | CG  | MET | 63 | -3.074 | -12.341 | -0.664 | 1.00 | 0.00 |
| ATOM | 989 | HG2 | MET | 63 | -3.717 | -11.470 | -0.538 | 1.00 | 0.00 |

|      |      |         |    |        |         |        |      |      |
|------|------|---------|----|--------|---------|--------|------|------|
| ATOM | 990  | HG3 MET | 63 | -2.322 | -12.129 | -1.425 | 1.00 | 0.00 |
| ATOM | 991  | SD MET  | 63 | -4.074 | -13.746 | -1.194 | 1.00 | 0.00 |
| ATOM | 992  | CE MET  | 63 | -4.932 | -14.124 | 0.337  | 1.00 | 0.00 |
| ATOM | 993  | HE1 MET | 63 | -5.517 | -13.259 | 0.649  | 1.00 | 0.00 |
| ATOM | 994  | HE2 MET | 63 | -5.596 | -14.974 | 0.181  | 1.00 | 0.00 |
| ATOM | 995  | HE3 MET | 63 | -4.204 | -14.368 | 1.111  | 1.00 | 0.00 |
| ATOM | 996  | C MET   | 63 | -0.464 | -11.882 | 2.117  | 1.00 | 0.00 |
| ATOM | 997  | O MET   | 63 | -1.042 | -12.392 | 3.034  | 1.00 | 0.00 |
| ATOM | 998  | N CYX   | 64 | 0.680  | -11.295 | 2.360  | 1.00 | 0.00 |
| ATOM | 999  | H CYX   | 64 | 1.177  | -10.912 | 1.567  | 1.00 | 0.00 |
| ATOM | 1000 | CA CYX  | 64 | 1.310  | -11.222 | 3.670  | 1.00 | 0.00 |
| ATOM | 1001 | HA CYX  | 64 | 0.736  | -10.530 | 4.286  | 1.00 | 0.00 |
| ATOM | 1002 | CB CYX  | 64 | 1.386  | -12.581 | 4.394  | 1.00 | 0.00 |
| ATOM | 1003 | HB2 CYX | 64 | 0.569  | -12.657 | 5.111  | 1.00 | 0.00 |
| ATOM | 1004 | HB3 CYX | 64 | 1.304  | -13.386 | 3.664  | 1.00 | 0.00 |
| ATOM | 1005 | SG CYX  | 64 | 2.928  | -12.895 | 5.346  | 1.00 | 0.00 |
| ATOM | 1006 | C CYX   | 64 | 2.684  | -10.627 | 3.487  | 1.00 | 0.00 |
| ATOM | 1007 | O CYX   | 64 | 2.946  | -9.551  | 4.026  | 1.00 | 0.00 |
| ATOM | 1008 | N PRO   | 65 | 3.535  | -11.293 | 2.685  | 1.00 | 0.00 |
| ATOM | 1009 | CD PRO  | 65 | 3.276  | -12.542 | 1.981  | 1.00 | 0.00 |
| ATOM | 1010 | HD2 PRO | 65 | 2.537  | -12.335 | 1.207  | 1.00 | 0.00 |
| ATOM | 1011 | HD3 PRO | 65 | 2.860  | -13.245 | 2.702  | 1.00 | 0.00 |

|      |      |     |     |    |       |         |        |      |      |
|------|------|-----|-----|----|-------|---------|--------|------|------|
| ATOM | 1012 | CG  | PRO | 65 | 4.597 | -13.012 | 1.412  | 1.00 | 0.00 |
| ATOM | 1013 | HG2 | PRO | 65 | 4.529 | -13.023 | 0.324  | 1.00 | 0.00 |
| ATOM | 1014 | HG3 | PRO | 65 | 4.798 | -14.020 | 1.773  | 1.00 | 0.00 |
| ATOM | 1015 | CB  | PRO | 65 | 5.659 | -12.046 | 1.889  | 1.00 | 0.00 |
| ATOM | 1016 | HB2 | PRO | 65 | 6.260 | -11.740 | 1.032  | 1.00 | 0.00 |
| ATOM | 1017 | HB3 | PRO | 65 | 6.309 | -12.463 | 2.658  | 1.00 | 0.00 |
| ATOM | 1018 | CA  | PRO | 65 | 4.895 | -10.837 | 2.448  | 1.00 | 0.00 |
| ATOM | 1019 | HA  | PRO | 65 | 5.331 | -10.517 | 3.394  | 1.00 | 0.00 |
| ATOM | 1020 | C   | PRO | 65 | 4.906 | -9.672  | 1.465  | 1.00 | 0.00 |
| ATOM | 1021 | O   | PRO | 65 | 5.711 | -8.762  | 1.605  | 1.00 | 0.00 |
| ATOM | 1022 | N   | ALA | 66 | 3.994 | -9.690  | 0.493  | 1.00 | 0.00 |
| ATOM | 1023 | H   | ALA | 66 | 3.369 | -10.479 | 0.412  | 1.00 | 0.00 |
| ATOM | 1024 | CA  | ALA | 66 | 3.880 | -8.635  | -0.464 | 1.00 | 0.00 |
| ATOM | 1025 | HA  | ALA | 66 | 4.850 | -8.361  | -0.881 | 1.00 | 0.00 |
| ATOM | 1026 | CB  | ALA | 66 | 2.969 | -9.058  | -1.596 | 1.00 | 0.00 |
| ATOM | 1027 | HB1 | ALA | 66 | 1.992 | -9.326  | -1.196 | 1.00 | 0.00 |
| ATOM | 1028 | HB2 | ALA | 66 | 2.859 | -8.234  | -2.302 | 1.00 | 0.00 |
| ATOM | 1029 | HB3 | ALA | 66 | 3.400 | -9.918  | -2.108 | 1.00 | 0.00 |
| ATOM | 1030 | C   | ALA | 66 | 3.333 | -7.422  | 0.228  | 1.00 | 0.00 |
| ATOM | 1031 | O   | ALA | 66 | 3.938 | -6.391  | 0.081  | 1.00 | 0.00 |
| ATOM | 1032 | N   | ILE | 67 | 2.251 | -7.524  | 0.995  | 1.00 | 0.00 |
| ATOM | 1033 | H   | ILE | 67 | 1.819 | -8.432  | 1.084  | 1.00 | 0.00 |

|      |      |      |     |    |        |        |       |      |      |
|------|------|------|-----|----|--------|--------|-------|------|------|
| ATOM | 1034 | CA   | ILE | 67 | 1.652  | -6.405 | 1.701 | 1.00 | 0.00 |
| ATOM | 1035 | HA   | ILE | 67 | 1.072  | -5.740 | 1.060 | 1.00 | 0.00 |
| ATOM | 1036 | CB   | ILE | 67 | 0.774  | -6.908 | 2.838 | 1.00 | 0.00 |
| ATOM | 1037 | HB   | ILE | 67 | 1.313  | -7.677 | 3.389 | 1.00 | 0.00 |
| ATOM | 1038 | CG2  | ILE | 67 | 0.414  | -5.751 | 3.790 | 1.00 | 0.00 |
| ATOM | 1039 | HG21 | ILE | 67 | -0.125 | -4.980 | 3.238 | 1.00 | 0.00 |
| ATOM | 1040 | HG22 | ILE | 67 | -0.214 | -6.126 | 4.597 | 1.00 | 0.00 |
| ATOM | 1041 | HG23 | ILE | 67 | 1.327  | -5.326 | 4.207 | 1.00 | 0.00 |
| ATOM | 1042 | CG1  | ILE | 67 | -0.456 | -7.638 | 2.265 | 1.00 | 0.00 |
| ATOM | 1043 | HG12 | ILE | 67 | -0.526 | -7.401 | 1.203 | 1.00 | 0.00 |
| ATOM | 1044 | HG13 | ILE | 67 | -0.302 | -8.710 | 2.388 | 1.00 | 0.00 |
| ATOM | 1045 | CD1  | ILE | 67 | -1.748 | -7.227 | 2.964 | 1.00 | 0.00 |
| ATOM | 1046 | HD11 | ILE | 67 | -1.903 | -6.155 | 2.840 | 1.00 | 0.00 |
| ATOM | 1047 | HD12 | ILE | 67 | -2.587 | -7.767 | 2.525 | 1.00 | 0.00 |
| ATOM | 1048 | HD13 | ILE | 67 | -1.678 | -7.463 | 4.025 | 1.00 | 0.00 |
| ATOM | 1049 | C    | ILE | 67 | 2.739  | -5.507 | 2.269 | 1.00 | 0.00 |
| ATOM | 1050 | O    | ILE | 67 | 2.769  | -4.339 | 1.999 | 1.00 | 0.00 |
| ATOM | 1051 | N    | MET | 68 | 3.691  | -6.010 | 3.022 | 1.00 | 0.00 |
| ATOM | 1052 | H    | MET | 68 | 3.662  | -6.990 | 3.264 | 1.00 | 0.00 |
| ATOM | 1053 | CA   | MET | 68 | 4.790  | -5.206 | 3.534 | 1.00 | 0.00 |
| ATOM | 1054 | HA   | MET | 68 | 4.451  | -4.556 | 4.341 | 1.00 | 0.00 |
| ATOM | 1055 | CB   | MET | 68 | 5.852  | -6.136 | 4.076 | 1.00 | 0.00 |

|      |      |         |    |       |         |        |      |      |
|------|------|---------|----|-------|---------|--------|------|------|
| ATOM | 1056 | HB2 MET | 68 | 6.176 | -6.798  | 3.273  | 1.00 | 0.00 |
| ATOM | 1057 | HB3 MET | 68 | 6.697 | -5.537  | 4.416  | 1.00 | 0.00 |
| ATOM | 1058 | CG MET  | 68 | 5.320 | -6.968  | 5.236  | 1.00 | 0.00 |
| ATOM | 1059 | HG2 MET | 68 | 5.529 | -6.451  | 6.172  | 1.00 | 0.00 |
| ATOM | 1060 | HG3 MET | 68 | 4.243 | -7.093  | 5.122  | 1.00 | 0.00 |
| ATOM | 1061 | SD MET  | 68 | 6.108 | -8.596  | 5.266  | 1.00 | 0.00 |
| ATOM | 1062 | CE MET  | 68 | 4.939 | -9.459  | 6.334  | 1.00 | 0.00 |
| ATOM | 1063 | HE1 MET | 68 | 3.950 | -9.446  | 5.875  | 1.00 | 0.00 |
| ATOM | 1064 | HE2 MET | 68 | 5.263 | -10.490 | 6.469  | 1.00 | 0.00 |
| ATOM | 1065 | HE3 MET | 68 | 4.896 | -8.962  | 7.303  | 1.00 | 0.00 |
| ATOM | 1066 | C MET   | 68 | 5.414 | -4.321  | 2.471  | 1.00 | 0.00 |
| ATOM | 1067 | O MET   | 68 | 5.303 | -3.103  | 2.617  | 1.00 | 0.00 |
| ATOM | 1068 | N MET   | 69 | 5.868 | -4.942  | 1.369  | 1.00 | 0.00 |
| ATOM | 1069 | H MET   | 69 | 5.897 | -5.951  | 1.362  | 1.00 | 0.00 |
| ATOM | 1070 | CA MET  | 69 | 6.370 | -4.235  | 0.213  | 1.00 | 0.00 |
| ATOM | 1071 | HA MET  | 69 | 7.244 | -3.642  | 0.482  | 1.00 | 0.00 |
| ATOM | 1072 | CB MET  | 69 | 6.773 | -5.236  | -0.858 | 1.00 | 0.00 |
| ATOM | 1073 | HB2 MET | 69 | 6.043 | -6.045  | -0.864 | 1.00 | 0.00 |
| ATOM | 1074 | HB3 MET | 69 | 6.761 | -4.729  | -1.824 | 1.00 | 0.00 |
| ATOM | 1075 | CG MET  | 69 | 8.153 | -5.803  | -0.603 | 1.00 | 0.00 |
| ATOM | 1076 | HG2 MET | 69 | 8.191 | -6.221  | 0.402  | 1.00 | 0.00 |
| ATOM | 1077 | HG3 MET | 69 | 8.360 | -6.588  | -1.331 | 1.00 | 0.00 |

|      |      |     |     |    |        |        |        |      |      |
|------|------|-----|-----|----|--------|--------|--------|------|------|
| ATOM | 1078 | SD  | MET | 69 | 9.405  | -4.506 | -0.755 | 1.00 | 0.00 |
| ATOM | 1079 | CE  | MET | 69 | 10.823 | -5.393 | -0.106 | 1.00 | 0.00 |
| ATOM | 1080 | HE1 | MET | 69 | 11.014 | -6.273 | -0.720 | 1.00 | 0.00 |
| ATOM | 1081 | HE2 | MET | 69 | 11.698 | -4.742 | -0.123 | 1.00 | 0.00 |
| ATOM | 1082 | HE3 | MET | 69 | 10.621 | -5.702 | 0.919  | 1.00 | 0.00 |
| ATOM | 1083 | C   | MET | 69 | 5.390  | -3.231 | -0.388 | 1.00 | 0.00 |
| ATOM | 1084 | O   | MET | 69 | 5.791  | -2.203 | -0.925 | 1.00 | 0.00 |
| ATOM | 1085 | N   | MET | 70 | 4.099  | -3.502 | -0.296 | 1.00 | 0.00 |
| ATOM | 1086 | H   | MET | 70 | 3.827  | -4.405 | 0.063  | 1.00 | 0.00 |
| ATOM | 1087 | CA  | MET | 70 | 3.068  | -2.605 | -0.731 | 1.00 | 0.00 |
| ATOM | 1088 | HA  | MET | 70 | 3.114  | -2.459 | -1.811 | 1.00 | 0.00 |
| ATOM | 1089 | CB  | MET | 70 | 1.719  | -3.210 | -0.379 | 1.00 | 0.00 |
| ATOM | 1090 | HB2 | MET | 70 | 1.100  | -3.133 | -1.273 | 1.00 | 0.00 |
| ATOM | 1091 | HB3 | MET | 70 | 1.898  | -4.260 | -0.151 | 1.00 | 0.00 |
| ATOM | 1092 | CG  | MET | 70 | 1.002  | -2.551 | 0.793  | 1.00 | 0.00 |
| ATOM | 1093 | HG2 | MET | 70 | 1.758  | -2.371 | 1.557  | 1.00 | 0.00 |
| ATOM | 1094 | HG3 | MET | 70 | 0.622  | -1.597 | 0.427  | 1.00 | 0.00 |
| ATOM | 1095 | SD  | MET | 70 | -0.349 | -3.490 | 1.508  | 1.00 | 0.00 |
| ATOM | 1096 | CE  | MET | 70 | -1.255 | -2.178 | 2.294  | 1.00 | 0.00 |
| ATOM | 1097 | HE1 | MET | 70 | -1.569 | -1.452 | 1.543  | 1.00 | 0.00 |
| ATOM | 1098 | HE2 | MET | 70 | -2.134 | -2.589 | 2.790  | 1.00 | 0.00 |
| ATOM | 1099 | HE3 | MET | 70 | -0.619 | -1.686 | 3.030  | 1.00 | 0.00 |

|      |      |      |     |    |        |        |        |      |      |
|------|------|------|-----|----|--------|--------|--------|------|------|
| ATOM | 1100 | C    | MET | 70 | 3.219  | -1.229 | -0.116 | 1.00 | 0.00 |
| ATOM | 1101 | O    | MET | 70 | 2.883  | -0.242 | -0.752 | 1.00 | 0.00 |
| ATOM | 1102 | N    | LEU | 71 | 3.645  | -1.179 | 1.149  | 1.00 | 0.00 |
| ATOM | 1103 | H    | LEU | 71 | 3.790  | -2.050 | 1.639  | 1.00 | 0.00 |
| ATOM | 1104 | CA   | LEU | 71 | 3.797  | 0.055  | 1.885  | 1.00 | 0.00 |
| ATOM | 1105 | HA   | LEU | 71 | 3.340  | 0.873  | 1.328  | 1.00 | 0.00 |
| ATOM | 1106 | CB   | LEU | 71 | 3.122  | -0.042 | 3.253  | 1.00 | 0.00 |
| ATOM | 1107 | HB2  | LEU | 71 | 3.595  | -0.914 | 3.704  | 1.00 | 0.00 |
| ATOM | 1108 | HB3  | LEU | 71 | 3.354  | 0.844  | 3.844  | 1.00 | 0.00 |
| ATOM | 1109 | CG   | LEU | 71 | 1.616  | -0.246 | 3.215  | 1.00 | 0.00 |
| ATOM | 1110 | HG   | LEU | 71 | 1.399  | -1.286 | 2.972  | 1.00 | 0.00 |
| ATOM | 1111 | CD1  | LEU | 71 | 1.023  | 0.090  | 4.556  | 1.00 | 0.00 |
| ATOM | 1112 | HD11 | LEU | 71 | 1.240  | 1.131  | 4.799  | 1.00 | 0.00 |
| ATOM | 1113 | HD12 | LEU | 71 | -0.056 | -0.057 | 4.523  | 1.00 | 0.00 |
| ATOM | 1114 | HD13 | LEU | 71 | 1.456  | -0.558 | 5.317  | 1.00 | 0.00 |
| ATOM | 1115 | CD2  | LEU | 71 | 0.918  | 0.541  | 2.112  | 1.00 | 0.00 |
| ATOM | 1116 | HD21 | LEU | 71 | 1.311  | 0.236  | 1.142  | 1.00 | 0.00 |
| ATOM | 1117 | HD22 | LEU | 71 | -0.154 | 0.345  | 2.147  | 1.00 | 0.00 |
| ATOM | 1118 | HD23 | LEU | 71 | 1.097  | 1.607  | 2.256  | 1.00 | 0.00 |
| ATOM | 1119 | C    | LEU | 71 | 5.273  | 0.381  | 1.946  | 1.00 | 0.00 |
| ATOM | 1120 | O    | LEU | 71 | 5.753  | 0.925  | 2.932  | 1.00 | 0.00 |
| ATOM | 1121 | N    | ASN | 72 | 6.020  | -0.020 | 0.930  | 1.00 | 0.00 |

|      |      |      |     |    |       |        |        |      |      |
|------|------|------|-----|----|-------|--------|--------|------|------|
| ATOM | 1122 | H    | ASN | 72 | 5.581 | -0.583 | 0.215  | 1.00 | 0.00 |
| ATOM | 1123 | CA   | ASN | 72 | 7.430 | 0.270  | 0.804  | 1.00 | 0.00 |
| ATOM | 1124 | HA   | ASN | 72 | 7.750 | 0.948  | 1.595  | 1.00 | 0.00 |
| ATOM | 1125 | CB   | ASN | 72 | 8.225 | -1.024 | 0.921  | 1.00 | 0.00 |
| ATOM | 1126 | HB2  | ASN | 72 | 7.938 | -1.819 | 0.233  | 1.00 | 0.00 |
| ATOM | 1127 | HB3  | ASN | 72 | 9.238 | -0.693 | 0.691  | 1.00 | 0.00 |
| ATOM | 1128 | CG   | ASN | 72 | 8.204 | -1.571 | 2.326  | 1.00 | 0.00 |
| ATOM | 1129 | OD1  | ASN | 72 | 8.038 | -2.740 | 2.591  | 1.00 | 0.00 |
| ATOM | 1130 | ND2  | ASN | 72 | 8.543 | -0.760 | 3.295  | 1.00 | 0.00 |
| ATOM | 1131 | HD21 | ASN | 72 | 8.541 | -1.090 | 4.249  | 1.00 | 0.00 |
| ATOM | 1132 | HD22 | ASN | 72 | 8.805 | 0.193  | 3.084  | 1.00 | 0.00 |
| ATOM | 1133 | C    | ASN | 72 | 7.731 | 0.949  | -0.518 | 1.00 | 0.00 |
| ATOM | 1134 | O    | ASN | 72 | 8.895 | 1.190  | -0.827 | 1.00 | 0.00 |
| ATOM | 1135 | N    | GLU | 73 | 6.689 | 1.200  | -1.306 | 1.00 | 0.00 |
| ATOM | 1136 | H    | GLU | 73 | 5.770 | 0.881  | -1.035 | 1.00 | 0.00 |
| ATOM | 1137 | CA   | GLU | 73 | 6.839 | 1.832  | -2.582 | 1.00 | 0.00 |
| ATOM | 1138 | HA   | GLU | 73 | 7.609 | 1.327  | -3.166 | 1.00 | 0.00 |
| ATOM | 1139 | CB   | GLU | 73 | 5.510 | 1.759  | -3.354 | 1.00 | 0.00 |
| ATOM | 1140 | HB2  | GLU | 73 | 4.748 | 1.318  | -2.712 | 1.00 | 0.00 |
| ATOM | 1141 | HB3  | GLU | 73 | 5.207 | 2.767  | -3.637 | 1.00 | 0.00 |
| ATOM | 1142 | CG   | GLU | 73 | 5.674 | 0.897  | -4.622 | 1.00 | 0.00 |
| ATOM | 1143 | HG2  | GLU | 73 | 6.709 | 0.768  | -4.938 | 1.00 | 0.00 |



|      |      |     |     |    |       |        |        |      |      |
|------|------|-----|-----|----|-------|--------|--------|------|------|
| ATOM | 1144 | HG3 | GLU | 73 | 5.270 | -0.063 | -4.301 | 1.00 | 0.00 |
| ATOM | 1145 | CD  | GLU | 73 | 4.846 | 1.432  | -5.794 | 1.00 | 0.00 |
| ATOM | 1146 | OE1 | GLU | 73 | 3.712 | 1.893  | -5.528 | 1.00 | 0.00 |
| ATOM | 1147 | OE2 | GLU | 73 | 5.413 | 1.502  | -6.907 | 1.00 | 0.00 |
| ATOM | 1148 | C   | GLU | 73 | 7.336 | 3.269  | -2.426 | 1.00 | 0.00 |
| ATOM | 1149 | O   | GLU | 73 | 7.461 | 3.797  | -1.308 | 1.00 | 0.00 |
| ATOM | 1150 | N   | PRO | 74 | 7.561 | 3.961  | -3.553 | 1.00 | 0.00 |
| ATOM | 1151 | CD  | PRO | 74 | 7.405 | 3.475  | -4.916 | 1.00 | 0.00 |
| ATOM | 1152 | HD2 | PRO | 74 | 6.341 | 3.290  | -5.065 | 1.00 | 0.00 |
| ATOM | 1153 | HD3 | PRO | 74 | 7.950 | 2.534  | -4.979 | 1.00 | 0.00 |
| ATOM | 1154 | CG  | PRO | 74 | 7.949 | 4.520  | -5.863 | 1.00 | 0.00 |
| ATOM | 1155 | HG2 | PRO | 74 | 7.144 | 4.902  | -6.492 | 1.00 | 0.00 |
| ATOM | 1156 | HG3 | PRO | 74 | 8.722 | 4.079  | -6.493 | 1.00 | 0.00 |
| ATOM | 1157 | CB  | PRO | 74 | 8.528 | 5.613  | -4.978 | 1.00 | 0.00 |
| ATOM | 1158 | HB2 | PRO | 74 | 8.212 | 6.597  | -5.325 | 1.00 | 0.00 |
| ATOM | 1159 | HB3 | PRO | 74 | 9.617 | 5.565  | -4.969 | 1.00 | 0.00 |
| ATOM | 1160 | CA  | PRO | 74 | 7.978 | 5.355  | -3.564 | 1.00 | 0.00 |
| ATOM | 1161 | HA  | PRO | 74 | 8.798 | 5.468  | -2.856 | 1.00 | 0.00 |
| ATOM | 1162 | C   | PRO | 74 | 6.839 | 6.307  | -3.182 | 1.00 | 0.00 |
| ATOM | 1163 | O   | PRO | 74 | 6.678 | 7.377  | -3.769 | 1.00 | 0.00 |
| ATOM | 1164 | N   | MET | 75 | 6.064 | 5.938  | -2.170 | 1.00 | 0.00 |
| ATOM | 1165 | H   | MET | 75 | 6.258 | 5.057  | -1.717 | 1.00 | 0.00 |

|      |      |     |     |    |        |        |        |      |      |
|------|------|-----|-----|----|--------|--------|--------|------|------|
| ATOM | 1166 | CA  | MET | 75 | 4.956  | 6.719  | -1.696 | 1.00 | 0.00 |
| ATOM | 1167 | HA  | MET | 75 | 5.277  | 7.729  | -1.440 | 1.00 | 0.00 |
| ATOM | 1168 | CB  | MET | 75 | 3.910  | 6.806  | -2.809 | 1.00 | 0.00 |
| ATOM | 1169 | HB2 | MET | 75 | 4.408  | 6.731  | -3.776 | 1.00 | 0.00 |
| ATOM | 1170 | HB3 | MET | 75 | 3.201  | 5.986  | -2.701 | 1.00 | 0.00 |
| ATOM | 1171 | CG  | MET | 75 | 3.168  | 8.131  | -2.723 | 1.00 | 0.00 |
| ATOM | 1172 | HG2 | MET | 75 | 3.424  | 8.622  | -1.784 | 1.00 | 0.00 |
| ATOM | 1173 | HG3 | MET | 75 | 3.472  | 8.764  | -3.558 | 1.00 | 0.00 |
| ATOM | 1174 | SD  | MET | 75 | 1.373  | 7.875  | -2.792 | 1.00 | 0.00 |
| ATOM | 1175 | CE  | MET | 75 | 0.969  | 9.048  | -4.095 | 1.00 | 0.00 |
| ATOM | 1176 | HE1 | MET | 75 | 1.498  | 8.775  | -5.008 | 1.00 | 0.00 |
| ATOM | 1177 | HE2 | MET | 75 | -0.105 | 9.032  | -4.280 | 1.00 | 0.00 |
| ATOM | 1178 | HE3 | MET | 75 | 1.269  | 10.050 | -3.789 | 1.00 | 0.00 |
| ATOM | 1179 | C   | MET | 75 | 4.350  | 6.075  | -0.457 | 1.00 | 0.00 |
| ATOM | 1180 | O   | MET | 75 | 3.144  | 6.124  | -0.261 | 1.00 | 0.00 |
| ATOM | 1181 | N   | TRP | 76 | 5.161  | 5.412  | 0.358  | 1.00 | 0.00 |
| ATOM | 1182 | H   | TRP | 76 | 6.128  | 5.290  | 0.093  | 1.00 | 0.00 |
| ATOM | 1183 | CA  | TRP | 76 | 4.696  | 4.775  | 1.569  | 1.00 | 0.00 |
| ATOM | 1184 | HA  | TRP | 76 | 3.871  | 5.342  | 1.999  | 1.00 | 0.00 |
| ATOM | 1185 | CB  | TRP | 76 | 4.207  | 3.366  | 1.252  | 1.00 | 0.00 |
| ATOM | 1186 | HB2 | TRP | 76 | 4.882  | 2.934  | 0.512  | 1.00 | 0.00 |
| ATOM | 1187 | HB3 | TRP | 76 | 4.196  | 2.739  | 2.143  | 1.00 | 0.00 |

|      |      |     |     |    |        |       |        |      |      |
|------|------|-----|-----|----|--------|-------|--------|------|------|
| ATOM | 1188 | CG  | TRP | 76 | 2.832  | 3.302 | 0.666  | 1.00 | 0.00 |
| ATOM | 1189 | CD1 | TRP | 76 | 2.452  | 2.746 | -0.501 | 1.00 | 0.00 |
| ATOM | 1190 | HD1 | TRP | 76 | 3.227  | 2.271 | -1.103 | 1.00 | 0.00 |
| ATOM | 1191 | NE1 | TRP | 76 | 1.096  | 2.915 | -0.678 | 1.00 | 0.00 |
| ATOM | 1192 | HE1 | TRP | 76 | 0.597  | 2.552 | -1.478 | 1.00 | 0.00 |
| ATOM | 1193 | CE2 | TRP | 76 | 0.538  | 3.610 | 0.356  | 1.00 | 0.00 |
| ATOM | 1194 | CZ2 | TRP | 76 | -0.757 | 4.021 | 0.635  | 1.00 | 0.00 |
| ATOM | 1195 | HZ2 | TRP | 76 | -1.543 | 3.791 | -0.084 | 1.00 | 0.00 |
| ATOM | 1196 | CH2 | TRP | 76 | -0.969 | 4.710 | 1.830  | 1.00 | 0.00 |
| ATOM | 1197 | HH2 | TRP | 76 | -1.979 | 5.036 | 2.077  | 1.00 | 0.00 |
| ATOM | 1198 | CZ3 | TRP | 76 | 0.068  | 4.995 | 2.715  | 1.00 | 0.00 |
| ATOM | 1199 | HZ3 | TRP | 76 | -0.095 | 5.549 | 3.639  | 1.00 | 0.00 |
| ATOM | 1200 | CE3 | TRP | 76 | 1.361  | 4.569 | 2.428  | 1.00 | 0.00 |
| ATOM | 1201 | HE3 | TRP | 76 | 2.126  | 4.774 | 3.176  | 1.00 | 0.00 |
| ATOM | 1202 | CD2 | TRP | 76 | 1.625  | 3.874 | 1.230  | 1.00 | 0.00 |
| ATOM | 1203 | C   | TRP | 76 | 5.800  | 4.800 | 2.603  | 1.00 | 0.00 |
| ATOM | 1204 | O   | TRP | 76 | 6.571  | 3.852 | 2.735  | 1.00 | 0.00 |
| ATOM | 1205 | N   | ILE | 77 | 5.923  | 5.919 | 3.320  | 1.00 | 0.00 |
| ATOM | 1206 | H   | ILE | 77 | 5.268  | 6.670 | 3.155  | 1.00 | 0.00 |
| ATOM | 1207 | CA  | ILE | 77 | 7.025  | 6.152 | 4.254  | 1.00 | 0.00 |
| ATOM | 1208 | HA  | ILE | 77 | 7.625  | 5.254 | 4.398  | 1.00 | 0.00 |
| ATOM | 1209 | CB  | ILE | 77 | 7.940  | 7.318 | 3.840  | 1.00 | 0.00 |

|      |      |      |     |    |       |       |       |      |      |
|------|------|------|-----|----|-------|-------|-------|------|------|
| ATOM | 1210 | HB   | ILE | 77 | 7.520 | 8.256 | 4.205 | 1.00 | 0.00 |
| ATOM | 1211 | CG2  | ILE | 77 | 9.342 | 7.115 | 4.442 | 1.00 | 0.00 |
| ATOM | 1212 | HG21 | ILE | 77 | 9.763 | 6.179 | 4.076 | 1.00 | 0.00 |
| ATOM | 1213 | HG22 | ILE | 77 | 9.988 | 7.943 | 4.147 | 1.00 | 0.00 |
| ATOM | 1214 | HG23 | ILE | 77 | 9.270 | 7.081 | 5.529 | 1.00 | 0.00 |
| ATOM | 1215 | CG1  | ILE | 77 | 7.992 | 7.511 | 2.323 | 1.00 | 0.00 |
| ATOM | 1216 | HG12 | ILE | 77 | 7.006 | 7.836 | 1.991 | 1.00 | 0.00 |
| ATOM | 1217 | HG13 | ILE | 77 | 8.722 | 8.291 | 2.107 | 1.00 | 0.00 |
| ATOM | 1218 | CD1  | ILE | 77 | 8.382 | 6.230 | 1.584 | 1.00 | 0.00 |
| ATOM | 1219 | HD11 | ILE | 77 | 7.652 | 5.450 | 1.798 | 1.00 | 0.00 |
| ATOM | 1220 | HD12 | ILE | 77 | 8.404 | 6.422 | 0.511 | 1.00 | 0.00 |
| ATOM | 1221 | HD13 | ILE | 77 | 9.368 | 5.905 | 1.915 | 1.00 | 0.00 |
| ATOM | 1222 | C    | ILE | 77 | 6.436 | 6.344 | 5.621 | 1.00 | 0.00 |
| ATOM | 1223 | O    | ILE | 77 | 5.497 | 5.672 | 5.985 | 1.00 | 0.00 |
| ATOM | 1224 | N    | ARG | 78 | 6.933 | 7.256 | 6.426 | 1.00 | 0.00 |
| ATOM | 1225 | H    | ARG | 78 | 7.715 | 7.802 | 6.094 | 1.00 | 0.00 |
| ATOM | 1226 | CA   | ARG | 78 | 6.406 | 7.544 | 7.731 | 1.00 | 0.00 |
| ATOM | 1227 | HA   | ARG | 78 | 6.628 | 6.716 | 8.403 | 1.00 | 0.00 |
| ATOM | 1228 | CB   | ARG | 78 | 7.018 | 8.810 | 8.303 | 1.00 | 0.00 |
| ATOM | 1229 | HB2  | ARG | 78 | 7.278 | 9.482 | 7.484 | 1.00 | 0.00 |
| ATOM | 1230 | HB3  | ARG | 78 | 6.290 | 9.296 | 8.953 | 1.00 | 0.00 |
| ATOM | 1231 | CG   | ARG | 78 | 8.274 | 8.476 | 9.105 | 1.00 | 0.00 |

|      |      |          |    |        |       |        |      |      |
|------|------|----------|----|--------|-------|--------|------|------|
| ATOM | 1232 | HG2 ARG  | 78 | 8.263  | 9.047 | 10.033 | 1.00 | 0.00 |
| ATOM | 1233 | HG3 ARG  | 78 | 8.274  | 7.411 | 9.333  | 1.00 | 0.00 |
| ATOM | 1234 | CD ARG   | 78 | 9.531  | 8.826 | 8.308  | 1.00 | 0.00 |
| ATOM | 1235 | HD2 ARG  | 78 | 9.449  | 8.417 | 7.301  | 1.00 | 0.00 |
| ATOM | 1236 | HD3 ARG  | 78 | 9.636  | 9.910 | 8.251  | 1.00 | 0.00 |
| ATOM | 1237 | NE ARG   | 78 | 10.732 | 8.269 | 8.946  | 1.00 | 0.00 |
| ATOM | 1238 | HE ARG   | 78 | 10.582 | 7.754 | 9.801  | 1.00 | 0.00 |
| ATOM | 1239 | CZ ARG   | 78 | 11.968 | 8.421 | 8.511  | 1.00 | 0.00 |
| ATOM | 1240 | NH1 ARG  | 78 | 12.212 | 9.085 | 7.411  | 1.00 | 0.00 |
| ATOM | 1241 | HH11 ARG | 78 | 11.448 | 9.487 | 6.887  | 1.00 | 0.00 |
| ATOM | 1242 | HH12 ARG | 78 | 13.164 | 9.193 | 7.090  | 1.00 | 0.00 |
| ATOM | 1243 | NH2 ARG  | 78 | 12.968 | 7.876 | 9.154  | 1.00 | 0.00 |
| ATOM | 1244 | HH21 ARG | 78 | 12.793 | 7.336 | 9.988  | 1.00 | 0.00 |
| ATOM | 1245 | HH22 ARG | 78 | 13.911 | 7.999 | 8.812  | 1.00 | 0.00 |
| ATOM | 1246 | C ARG    | 78 | 4.927  | 7.784 | 7.713  | 1.00 | 0.00 |
| ATOM | 1247 | O ARG    | 78 | 4.324  | 7.365 | 8.673  | 1.00 | 0.00 |
| ATOM | 1248 | N MET    | 79 | 4.374  | 8.320 | 6.629  | 1.00 | 0.00 |
| ATOM | 1249 | H MET    | 79 | 5.003  | 8.628 | 5.901  | 1.00 | 0.00 |
| ATOM | 1250 | CA MET   | 79 | 2.952  | 8.472 | 6.415  | 1.00 | 0.00 |
| ATOM | 1251 | HA MET   | 79 | 2.569  | 9.260 | 7.063  | 1.00 | 0.00 |
| ATOM | 1252 | CB MET   | 79 | 2.651  | 8.843 | 4.967  | 1.00 | 0.00 |
| ATOM | 1253 | HB2 MET  | 79 | 1.579  | 8.736 | 4.801  | 1.00 | 0.00 |

|      |      |         |    |       |       |       |      |      |
|------|------|---------|----|-------|-------|-------|------|------|
| ATOM | 1254 | HB3 MET | 79 | 2.940 | 9.883 | 4.812 | 1.00 | 0.00 |
| ATOM | 1255 | CG MET  | 79 | 3.412 | 7.949 | 3.980 | 1.00 | 0.00 |
| ATOM | 1256 | HG2 MET | 79 | 4.134 | 7.379 | 4.564 | 1.00 | 0.00 |
| ATOM | 1257 | HG3 MET | 79 | 2.681 | 7.269 | 3.543 | 1.00 | 0.00 |
| ATOM | 1258 | SD MET  | 79 | 4.264 | 8.809 | 2.675 | 1.00 | 0.00 |
| ATOM | 1259 | CE MET  | 79 | 3.179 | 8.402 | 1.315 | 1.00 | 0.00 |
| ATOM | 1260 | HE1 MET | 79 | 2.178 | 8.779 | 1.523 | 1.00 | 0.00 |
| ATOM | 1261 | HE2 MET | 79 | 3.556 | 8.860 | 0.399 | 1.00 | 0.00 |
| ATOM | 1262 | HE3 MET | 79 | 3.141 | 7.320 | 1.191 | 1.00 | 0.00 |
| ATOM | 1263 | C MET   | 79 | 2.210 | 7.192 | 6.699 | 1.00 | 0.00 |
| ATOM | 1264 | O MET   | 79 | 1.094 | 7.246 | 7.135 | 1.00 | 0.00 |
| ATOM | 1265 | N ARG   | 80 | 2.825 | 6.024 | 6.581 | 1.00 | 0.00 |
| ATOM | 1266 | H ARG   | 80 | 3.721 | 6.025 | 6.114 | 1.00 | 0.00 |
| ATOM | 1267 | CA ARG  | 80 | 2.276 | 4.777 | 6.983 | 1.00 | 0.00 |
| ATOM | 1268 | HA ARG  | 80 | 1.347 | 4.615 | 6.436 | 1.00 | 0.00 |
| ATOM | 1269 | CB ARG  | 80 | 3.198 | 3.616 | 6.719 | 1.00 | 0.00 |
| ATOM | 1270 | HB2 ARG | 80 | 4.116 | 3.760 | 7.289 | 1.00 | 0.00 |
| ATOM | 1271 | HB3 ARG | 80 | 2.709 | 2.698 | 7.044 | 1.00 | 0.00 |
| ATOM | 1272 | CG ARG  | 80 | 3.533 | 3.515 | 5.235 | 1.00 | 0.00 |
| ATOM | 1273 | HG2 ARG | 80 | 2.703 | 3.046 | 4.707 | 1.00 | 0.00 |
| ATOM | 1274 | HG3 ARG | 80 | 3.701 | 4.514 | 4.832 | 1.00 | 0.00 |
| ATOM | 1275 | CD ARG  | 80 | 4.792 | 2.675 | 5.050 | 1.00 | 0.00 |

|      |      |      |     |    |       |       |        |      |      |
|------|------|------|-----|----|-------|-------|--------|------|------|
| ATOM | 1276 | HD2  | ARG | 80 | 4.523 | 1.635 | 5.228  | 1.00 | 0.00 |
| ATOM | 1277 | HD3  | ARG | 80 | 5.118 | 2.794 | 4.016  | 1.00 | 0.00 |
| ATOM | 1278 | NE   | ARG | 80 | 5.901 | 3.030 | 5.934  | 1.00 | 0.00 |
| ATOM | 1279 | HE   | ARG | 80 | 5.845 | 3.978 | 6.278  | 1.00 | 0.00 |
| ATOM | 1280 | CZ   | ARG | 80 | 6.912 | 2.294 | 6.301  | 1.00 | 0.00 |
| ATOM | 1281 | NH1  | ARG | 80 | 7.027 | 1.083 | 5.847  | 1.00 | 0.00 |
| ATOM | 1282 | HH11 | ARG | 80 | 6.333 | 0.718 | 5.211  | 1.00 | 0.00 |
| ATOM | 1283 | HH12 | ARG | 80 | 7.811 | 0.513 | 6.131  | 1.00 | 0.00 |
| ATOM | 1284 | NH2  | ARG | 80 | 7.802 | 2.772 | 7.134  | 1.00 | 0.00 |
| ATOM | 1285 | HH21 | ARG | 80 | 7.702 | 3.712 | 7.490  | 1.00 | 0.00 |
| ATOM | 1286 | HH22 | ARG | 80 | 8.584 | 2.199 | 7.416  | 1.00 | 0.00 |
| ATOM | 1287 | C    | ARG | 80 | 1.881 | 4.801 | 8.421  | 1.00 | 0.00 |
| ATOM | 1288 | O    | ARG | 80 | 1.163 | 3.915 | 8.737  | 1.00 | 0.00 |
| ATOM | 1289 | N    | ASP | 81 | 2.219 | 5.750 | 9.261  | 1.00 | 0.00 |
| ATOM | 1290 | H    | ASP | 81 | 2.759 | 6.493 | 8.840  | 1.00 | 0.00 |
| ATOM | 1291 | CA   | ASP | 81 | 1.889 | 5.853 | 10.668 | 1.00 | 0.00 |
| ATOM | 1292 | HA   | ASP | 81 | 2.625 | 5.323 | 11.272 | 1.00 | 0.00 |
| ATOM | 1293 | CB   | ASP | 81 | 1.892 | 7.323 | 11.075 | 1.00 | 0.00 |
| ATOM | 1294 | HB2  | ASP | 81 | 2.690 | 7.813 | 10.515 | 1.00 | 0.00 |
| ATOM | 1295 | HB3  | ASP | 81 | 0.934 | 7.767 | 10.804 | 1.00 | 0.00 |
| ATOM | 1296 | CG   | ASP | 81 | 2.133 | 7.507 | 12.570 | 1.00 | 0.00 |
| ATOM | 1297 | OD1  | ASP | 81 | 2.389 | 6.503 | 13.268 | 1.00 | 0.00 |

|      |      |      |     |    |        |       |        |      |      |
|------|------|------|-----|----|--------|-------|--------|------|------|
| ATOM | 1298 | OD2  | ASP | 81 | 2.036  | 8.670 | 13.002 | 1.00 | 0.00 |
| ATOM | 1299 | C    | ASP | 81 | 0.494  | 5.295 | 10.949 | 1.00 | 0.00 |
| ATOM | 1300 | O    | ASP | 81 | 0.318  | 4.325 | 11.680 | 1.00 | 0.00 |
| ATOM | 1301 | N    | GLN | 82 | -0.485 | 5.781 | 10.175 | 1.00 | 0.00 |
| ATOM | 1302 | H    | GLN | 82 | -0.280 | 6.527 | 9.525  | 1.00 | 0.00 |
| ATOM | 1303 | CA   | GLN | 82 | -1.841 | 5.328 | 10.285 | 1.00 | 0.00 |
| ATOM | 1304 | HA   | GLN | 82 | -2.056 | 5.127 | 11.334 | 1.00 | 0.00 |
| ATOM | 1305 | CB   | GLN | 82 | -2.841 | 6.339 | 9.772  | 1.00 | 0.00 |
| ATOM | 1306 | HB2  | GLN | 82 | -2.326 | 7.043 | 9.118  | 1.00 | 0.00 |
| ATOM | 1307 | HB3  | GLN | 82 | -3.612 | 5.816 | 9.206  | 1.00 | 0.00 |
| ATOM | 1308 | CG   | GLN | 82 | -3.482 | 7.094 | 10.923 | 1.00 | 0.00 |
| ATOM | 1309 | HG2  | GLN | 82 | -4.388 | 7.569 | 10.546 | 1.00 | 0.00 |
| ATOM | 1310 | HG3  | GLN | 82 | -3.741 | 6.401 | 11.723 | 1.00 | 0.00 |
| ATOM | 1311 | CD   | GLN | 82 | -2.570 | 8.169 | 11.488 | 1.00 | 0.00 |
| ATOM | 1312 | OE1  | GLN | 82 | -2.811 | 9.352 | 11.351 | 1.00 | 0.00 |
| ATOM | 1313 | NE2  | GLN | 82 | -1.488 | 7.769 | 12.113 | 1.00 | 0.00 |
| ATOM | 1314 | HE21 | GLN | 82 | -0.853 | 8.451 | 12.504 | 1.00 | 0.00 |
| ATOM | 1315 | HE22 | GLN | 82 | -1.294 | 6.782 | 12.199 | 1.00 | 0.00 |
| ATOM | 1316 | C    | GLN | 82 | -2.047 | 4.044 | 9.583  | 1.00 | 0.00 |
| ATOM | 1317 | O    | GLN | 82 | -2.136 | 3.067 | 10.307 | 1.00 | 0.00 |
| ATOM | 1318 | N    | VAL | 83 | -2.231 | 4.062 | 8.256  | 1.00 | 0.00 |
| ATOM | 1319 | H    | VAL | 83 | -2.378 | 4.979 | 7.858  | 1.00 | 0.00 |



|      |      |      |     |    |        |       |        |      |      |
|------|------|------|-----|----|--------|-------|--------|------|------|
| ATOM | 1320 | CA   | VAL | 83 | -2.304 | 2.915 | 7.379  | 1.00 | 0.00 |
| ATOM | 1321 | HA   | VAL | 83 | -3.317 | 2.525 | 7.285  | 1.00 | 0.00 |
| ATOM | 1322 | CB   | VAL | 83 | -1.759 | 3.189 | 5.988  | 1.00 | 0.00 |
| ATOM | 1323 | HB   | VAL | 83 | -2.608 | 3.290 | 5.312  | 1.00 | 0.00 |
| ATOM | 1324 | CG1  | VAL | 83 | -0.921 | 4.427 | 5.923  | 1.00 | 0.00 |
| ATOM | 1325 | HG11 | VAL | 83 | -0.071 | 4.327 | 6.597  | 1.00 | 0.00 |
| ATOM | 1326 | HG12 | VAL | 83 | -0.560 | 4.570 | 4.904  | 1.00 | 0.00 |
| ATOM | 1327 | HG13 | VAL | 83 | -1.520 | 5.288 | 6.219  | 1.00 | 0.00 |
| ATOM | 1328 | CG2  | VAL | 83 | -0.995 | 2.026 | 5.425  | 1.00 | 0.00 |
| ATOM | 1329 | HG21 | VAL | 83 | -1.650 | 1.157 | 5.361  | 1.00 | 0.00 |
| ATOM | 1330 | HG22 | VAL | 83 | -0.629 | 2.279 | 4.429  | 1.00 | 0.00 |
| ATOM | 1331 | HG23 | VAL | 83 | -0.150 | 1.797 | 6.074  | 1.00 | 0.00 |
| ATOM | 1332 | C    | VAL | 83 | -1.583 | 1.725 | 7.968  | 1.00 | 0.00 |
| ATOM | 1333 | O    | VAL | 83 | -2.166 | 0.685 | 8.046  | 1.00 | 0.00 |
| ATOM | 1334 | N    | MET | 84 | -0.353 | 1.813 | 8.415  | 1.00 | 0.00 |
| ATOM | 1335 | H    | MET | 84 | 0.108  | 2.688 | 8.208  | 1.00 | 0.00 |
| ATOM | 1336 | CA   | MET | 84 | 0.386  | 0.803 | 9.130  | 1.00 | 0.00 |
| ATOM | 1337 | HA   | MET | 84 | 0.814  | 0.089 | 8.427  | 1.00 | 0.00 |
| ATOM | 1338 | CB   | MET | 84 | 1.513  | 1.440 | 9.921  | 1.00 | 0.00 |
| ATOM | 1339 | HB2  | MET | 84 | 2.212  | 1.894 | 9.218  | 1.00 | 0.00 |
| ATOM | 1340 | HB3  | MET | 84 | 1.089  | 2.214 | 10.560 | 1.00 | 0.00 |
| ATOM | 1341 | CG   | MET | 84 | 2.244  | 0.423 | 10.776 | 1.00 | 0.00 |

|      |      |     |     |    |        |        |        |      |      |
|------|------|-----|-----|----|--------|--------|--------|------|------|
| ATOM | 1342 | HG2 | MET | 84 | 1.523  | -0.031 | 11.454 | 1.00 | 0.00 |
| ATOM | 1343 | HG3 | MET | 84 | 2.655  | -0.342 | 10.117 | 1.00 | 0.00 |
| ATOM | 1344 | SD  | MET | 84 | 3.582  | 1.159  | 11.738 | 1.00 | 0.00 |
| ATOM | 1345 | CE  | MET | 84 | 2.684  | 2.590  | 12.420 | 1.00 | 0.00 |
| ATOM | 1346 | HE1 | MET | 84 | 1.840  | 2.241  | 13.014 | 1.00 | 0.00 |
| ATOM | 1347 | HE2 | MET | 84 | 3.355  | 3.174  | 13.050 | 1.00 | 0.00 |
| ATOM | 1348 | HE3 | MET | 84 | 2.319  | 3.214  | 11.603 | 1.00 | 0.00 |
| ATOM | 1349 | C   | MET | 84 | -0.487 | 0.011  | 10.090 | 1.00 | 0.00 |
| ATOM | 1350 | O   | MET | 84 | -0.679 | -1.188 | 9.891  | 1.00 | 0.00 |
| ATOM | 1351 | N   | SER | 85 | -1.051 | 0.677  | 11.099 | 1.00 | 0.00 |
| ATOM | 1352 | H   | SER | 85 | -0.757 | 1.629  | 11.266 | 1.00 | 0.00 |
| ATOM | 1353 | CA  | SER | 85 | -2.002 | 0.080  | 12.015 | 1.00 | 0.00 |
| ATOM | 1354 | HA  | SER | 85 | -1.739 | -0.961 | 12.200 | 1.00 | 0.00 |
| ATOM | 1355 | CB  | SER | 85 | -1.988 | 0.827  | 13.338 | 1.00 | 0.00 |
| ATOM | 1356 | HB2 | SER | 85 | -0.962 | 1.053  | 13.628 | 1.00 | 0.00 |
| ATOM | 1357 | HB3 | SER | 85 | -2.552 | 1.756  | 13.248 | 1.00 | 0.00 |
| ATOM | 1358 | OG  | SER | 85 | -2.587 | 0.003  | 14.324 | 1.00 | 0.00 |
| ATOM | 1359 | HG  | SER | 85 | -2.586 | 0.462  | 15.167 | 1.00 | 0.00 |
| ATOM | 1360 | C   | SER | 85 | -3.422 | 0.030  | 11.435 | 1.00 | 0.00 |
| ATOM | 1361 | O   | SER | 85 | -4.412 | 0.135  | 12.146 | 1.00 | 0.00 |
| ATOM | 1362 | N   | MET | 86 | -3.551 | -0.274 | 10.152 | 1.00 | 0.00 |
| ATOM | 1363 | H   | MET | 86 | -2.706 | -0.445 | 9.626  | 1.00 | 0.00 |

|      |      |     |     |    |        |        |        |      |      |
|------|------|-----|-----|----|--------|--------|--------|------|------|
| ATOM | 1364 | CA  | MET | 86 | -4.815 | -0.360 | 9.462  | 1.00 | 0.00 |
| ATOM | 1365 | HA  | MET | 86 | -5.599 | -0.698 | 10.139 | 1.00 | 0.00 |
| ATOM | 1366 | CB  | MET | 86 | -5.185 | 1.010  | 8.941  | 1.00 | 0.00 |
| ATOM | 1367 | HB2 | MET | 86 | -4.265 | 1.516  | 8.646  | 1.00 | 0.00 |
| ATOM | 1368 | HB3 | MET | 86 | -5.821 | 0.875  | 8.066  | 1.00 | 0.00 |
| ATOM | 1369 | CG  | MET | 86 | -5.914 | 1.849  | 9.970  | 1.00 | 0.00 |
| ATOM | 1370 | HG2 | MET | 86 | -5.285 | 1.973  | 10.851 | 1.00 | 0.00 |
| ATOM | 1371 | HG3 | MET | 86 | -6.143 | 2.828  | 9.547  | 1.00 | 0.00 |
| ATOM | 1372 | SD  | MET | 86 | -7.455 | 1.033  | 10.449 | 1.00 | 0.00 |
| ATOM | 1373 | CE  | MET | 86 | -7.893 | 2.071  | 11.854 | 1.00 | 0.00 |
| ATOM | 1374 | HE1 | MET | 86 | -8.012 | 3.103  | 11.521 | 1.00 | 0.00 |
| ATOM | 1375 | HE2 | MET | 86 | -8.829 | 1.720  | 12.288 | 1.00 | 0.00 |
| ATOM | 1376 | HE3 | MET | 86 | -7.103 | 2.021  | 12.603 | 1.00 | 0.00 |
| ATOM | 1377 | C   | MET | 86 | -4.776 | -1.329 | 8.298  | 1.00 | 0.00 |
| ATOM | 1378 | O   | MET | 86 | -5.590 | -2.229 | 8.230  | 1.00 | 0.00 |
| ATOM | 1379 | N   | ALA | 87 | -3.757 | -1.292 | 7.464  | 1.00 | 0.00 |
| ATOM | 1380 | H   | ALA | 87 | -3.123 | -0.518 | 7.600  | 1.00 | 0.00 |
| ATOM | 1381 | CA  | ALA | 87 | -3.505 | -2.190 | 6.385  | 1.00 | 0.00 |
| ATOM | 1382 | HA  | ALA | 87 | -4.431 | -2.450 | 5.872  | 1.00 | 0.00 |
| ATOM | 1383 | CB  | ALA | 87 | -2.561 | -1.533 | 5.382  | 1.00 | 0.00 |
| ATOM | 1384 | HB1 | ALA | 87 | -1.625 | -1.274 | 5.878  | 1.00 | 0.00 |
| ATOM | 1385 | HB2 | ALA | 87 | -2.359 | -2.225 | 4.564  | 1.00 | 0.00 |

|      |      |     |     |    |        |        |        |      |      |
|------|------|-----|-----|----|--------|--------|--------|------|------|
| ATOM | 1386 | HB3 | ALA | 87 | -3.023 | -0.629 | 4.985  | 1.00 | 0.00 |
| ATOM | 1387 | C   | ALA | 87 | -2.929 | -3.480 | 6.933  | 1.00 | 0.00 |
| ATOM | 1388 | O   | ALA | 87 | -2.530 | -4.322 | 6.164  | 1.00 | 0.00 |
| ATOM | 1389 | N   | HIE | 88 | -2.806 | -3.645 | 8.242  | 1.00 | 0.00 |
| ATOM | 1390 | H   | HIE | 88 | -2.987 | -2.853 | 8.842  | 1.00 | 0.00 |
| ATOM | 1391 | CA  | HIE | 88 | -2.359 | -4.869 | 8.846  | 1.00 | 0.00 |
| ATOM | 1392 | HA  | HIE | 88 | -1.830 | -5.488 | 8.121  | 1.00 | 0.00 |
| ATOM | 1393 | CB  | HIE | 88 | -1.404 | -4.524 | 9.980  | 1.00 | 0.00 |
| ATOM | 1394 | HB2 | HIE | 88 | -0.781 | -5.388 | 10.208 | 1.00 | 0.00 |
| ATOM | 1395 | HB3 | HIE | 88 | -0.772 | -3.696 | 9.658  | 1.00 | 0.00 |
| ATOM | 1396 | CG  | HIE | 88 | -2.046 | -4.099 | 11.280 | 1.00 | 0.00 |
| ATOM | 1397 | ND1 | HIE | 88 | -1.772 | -4.654 | 12.511 | 1.00 | 0.00 |
| ATOM | 1398 | CE1 | HIE | 88 | -2.505 | -3.993 | 13.436 | 1.00 | 0.00 |
| ATOM | 1399 | HE1 | HIE | 88 | -2.410 | -4.257 | 14.489 | 1.00 | 0.00 |
| ATOM | 1400 | NE2 | HIE | 88 | -3.272 | -3.059 | 12.818 | 1.00 | 0.00 |
| ATOM | 1401 | HE2 | HIE | 88 | -3.930 | -2.420 | 13.240 | 1.00 | 0.00 |
| ATOM | 1402 | CD2 | HIE | 88 | -2.993 | -3.130 | 11.467 | 1.00 | 0.00 |
| ATOM | 1403 | HD2 | HIE | 88 | -3.508 | -2.470 | 10.768 | 1.00 | 0.00 |
| ATOM | 1404 | C   | HIE | 88 | -3.546 | -5.675 | 9.311  | 1.00 | 0.00 |
| ATOM | 1405 | O   | HIE | 88 | -3.409 | -6.859 | 9.481  | 1.00 | 0.00 |
| ATOM | 1406 | N   | ASN | 89 | -4.677 | -5.035 | 9.588  | 1.00 | 0.00 |
| ATOM | 1407 | H   | ASN | 89 | -4.686 | -4.028 | 9.502  | 1.00 | 0.00 |

|      |      |      |     |    |        |        |        |      |      |
|------|------|------|-----|----|--------|--------|--------|------|------|
| ATOM | 1408 | CA   | ASN | 89 | -5.897 | -5.700 | 9.980  | 1.00 | 0.00 |
| ATOM | 1409 | HA   | ASN | 89 | -5.686 | -6.730 | 10.265 | 1.00 | 0.00 |
| ATOM | 1410 | CB   | ASN | 89 | -6.520 | -4.983 | 11.170 | 1.00 | 0.00 |
| ATOM | 1411 | HB2  | ASN | 89 | -6.285 | -3.919 | 11.123 | 1.00 | 0.00 |
| ATOM | 1412 | HB3  | ASN | 89 | -7.602 | -5.116 | 11.162 | 1.00 | 0.00 |
| ATOM | 1413 | CG   | ASN | 89 | -5.975 | -5.540 | 12.459 | 1.00 | 0.00 |
| ATOM | 1414 | OD1  | ASN | 89 | -6.654 | -5.905 | 13.384 | 1.00 | 0.00 |
| ATOM | 1415 | ND2  | ASN | 89 | -4.673 | -5.614 | 12.546 | 1.00 | 0.00 |
| ATOM | 1416 | HD21 | ASN | 89 | -4.246 | -5.978 | 13.385 | 1.00 | 0.00 |
| ATOM | 1417 | HD22 | ASN | 89 | -4.100 | -5.306 | 11.773 | 1.00 | 0.00 |
| ATOM | 1418 | C    | ASN | 89 | -6.899 | -5.675 | 8.853  | 1.00 | 0.00 |
| ATOM | 1419 | O    | ASN | 89 | -7.757 | -6.514 | 8.833  | 1.00 | 0.00 |
| ATOM | 1420 | N    | LEU | 90 | -6.795 | -4.746 | 7.912  | 1.00 | 0.00 |
| ATOM | 1421 | H    | LEU | 90 | -6.127 | -4.001 | 8.053  | 1.00 | 0.00 |
| ATOM | 1422 | CA   | LEU | 90 | -7.639 | -4.697 | 6.735  | 1.00 | 0.00 |
| ATOM | 1423 | HA   | LEU | 90 | -8.688 | -4.641 | 7.024  | 1.00 | 0.00 |
| ATOM | 1424 | CB   | LEU | 90 | -7.293 | -3.453 | 5.906  | 1.00 | 0.00 |
| ATOM | 1425 | HB2  | LEU | 90 | -6.224 | -3.291 | 6.045  | 1.00 | 0.00 |
| ATOM | 1426 | HB3  | LEU | 90 | -7.494 | -3.663 | 4.855  | 1.00 | 0.00 |
| ATOM | 1427 | CG   | LEU | 90 | -8.056 | -2.199 | 6.329  | 1.00 | 0.00 |
| ATOM | 1428 | HG   | LEU | 90 | -8.079 | -2.142 | 7.417  | 1.00 | 0.00 |
| ATOM | 1429 | CD1  | LEU | 90 | -7.365 | -0.951 | 5.767  | 1.00 | 0.00 |

|      |      |      |     |    |         |        |       |      |      |
|------|------|------|-----|----|---------|--------|-------|------|------|
| ATOM | 1430 | HD11 | LEU | 90 | -7.342  | -1.006 | 4.678 | 1.00 | 0.00 |
| ATOM | 1431 | HD12 | LEU | 90 | -7.915  | -0.061 | 6.073 | 1.00 | 0.00 |
| ATOM | 1432 | HD13 | LEU | 90 | -6.345  | -0.896 | 6.149 | 1.00 | 0.00 |
| ATOM | 1433 | CD2  | LEU | 90 | -9.499  | -2.279 | 5.839 | 1.00 | 0.00 |
| ATOM | 1434 | HD21 | LEU | 90 | -9.982  | -3.155 | 6.270 | 1.00 | 0.00 |
| ATOM | 1435 | HD22 | LEU | 90 | -10.037 | -1.381 | 6.144 | 1.00 | 0.00 |
| ATOM | 1436 | HD23 | LEU | 90 | -9.510  | -2.356 | 4.751 | 1.00 | 0.00 |
| ATOM | 1437 | C    | LEU | 90 | -7.511  | -5.978 | 5.908 | 1.00 | 0.00 |
| ATOM | 1438 | O    | LEU | 90 | -8.514  | -6.596 | 5.574 | 1.00 | 0.00 |
| ATOM | 1439 | N    | PRO | 91 | -6.277  | -6.401 | 5.581 | 1.00 | 0.00 |
| ATOM | 1440 | CD   | PRO | 91 | -5.017  | -5.787 | 5.923 | 1.00 | 0.00 |
| ATOM | 1441 | HD2  | PRO | 91 | -4.906  | -5.865 | 7.004 | 1.00 | 0.00 |
| ATOM | 1442 | HD3  | PRO | 91 | -5.086  | -4.736 | 5.641 | 1.00 | 0.00 |
| ATOM | 1443 | CG   | PRO | 91 | -3.928  | -6.511 | 5.176 | 1.00 | 0.00 |
| ATOM | 1444 | HG2  | PRO | 91 | -3.251  | -6.981 | 5.889 | 1.00 | 0.00 |
| ATOM | 1445 | HG3  | PRO | 91 | -3.373  | -5.798 | 4.564 | 1.00 | 0.00 |
| ATOM | 1446 | CB   | PRO | 91 | -4.616  | -7.533 | 4.317 | 1.00 | 0.00 |
| ATOM | 1447 | HB2  | PRO | 91 | -4.117  | -8.490 | 4.464 | 1.00 | 0.00 |
| ATOM | 1448 | HB3  | PRO | 91 | -4.618  | -7.285 | 3.255 | 1.00 | 0.00 |
| ATOM | 1449 | CA   | PRO | 91 | -6.045  | -7.608 | 4.836 | 1.00 | 0.00 |
| ATOM | 1450 | HA   | PRO | 91 | -6.750  | -7.658 | 4.006 | 1.00 | 0.00 |
| ATOM | 1451 | C    | PRO | 91 | -6.232  | -8.811 | 5.728 | 1.00 | 0.00 |

|      |      |      |     |    |        |         |        |      |      |
|------|------|------|-----|----|--------|---------|--------|------|------|
| ATOM | 1452 | O    | PRO | 91 | -6.746 | -9.809  | 5.282  | 1.00 | 0.00 |
| ATOM | 1453 | N    | ILE | 92 | -5.856 | -8.764  | 6.986  | 1.00 | 0.00 |
| ATOM | 1454 | H    | ILE | 92 | -5.369 | -7.949  | 7.331  | 1.00 | 0.00 |
| ATOM | 1455 | CA   | ILE | 92 | -6.063 | -9.874  | 7.890  | 1.00 | 0.00 |
| ATOM | 1456 | HA   | ILE | 92 | -5.704 | -10.833 | 7.516  | 1.00 | 0.00 |
| ATOM | 1457 | CB   | ILE | 92 | -5.375 | -9.555  | 9.211  | 1.00 | 0.00 |
| ATOM | 1458 | HB   | ILE | 92 | -5.408 | -8.477  | 9.369  | 1.00 | 0.00 |
| ATOM | 1459 | CG2  | ILE | 92 | -6.066 | -10.265 | 10.381 | 1.00 | 0.00 |
| ATOM | 1460 | HG21 | ILE | 92 | -6.033 | -11.343 | 10.223 | 1.00 | 0.00 |
| ATOM | 1461 | HG22 | ILE | 92 | -5.553 | -10.018 | 11.310 | 1.00 | 0.00 |
| ATOM | 1462 | HG23 | ILE | 92 | -7.104 | -9.939  | 10.442 | 1.00 | 0.00 |
| ATOM | 1463 | CG1  | ILE | 92 | -3.885 | -9.882  | 9.132  | 1.00 | 0.00 |
| ATOM | 1464 | HG12 | ILE | 92 | -3.759 | -10.624 | 8.344  | 1.00 | 0.00 |
| ATOM | 1465 | HG13 | ILE | 92 | -3.367 | -8.964  | 8.852  | 1.00 | 0.00 |
| ATOM | 1466 | CD1  | ILE | 92 | -3.302 | -10.416 | 10.428 | 1.00 | 0.00 |
| ATOM | 1467 | HD11 | ILE | 92 | -3.818 | -11.333 | 10.708 | 1.00 | 0.00 |
| ATOM | 1468 | HD12 | ILE | 92 | -2.241 | -10.624 | 10.291 | 1.00 | 0.00 |
| ATOM | 1469 | HD13 | ILE | 92 | -3.427 | -9.673  | 11.216 | 1.00 | 0.00 |
| ATOM | 1470 | C    | ILE | 92 | -7.539 | -10.153 | 8.091  | 1.00 | 0.00 |
| ATOM | 1471 | O    | ILE | 92 | -7.925 | -11.311 | 8.035  | 1.00 | 0.00 |
| ATOM | 1472 | N    | GLU | 93 | -8.340 | -9.114  | 8.288  | 1.00 | 0.00 |
| ATOM | 1473 | H    | GLU | 93 | -7.939 | -8.188  | 8.336  | 1.00 | 0.00 |

|      |      |     |     |    |         |         |        |      |      |
|------|------|-----|-----|----|---------|---------|--------|------|------|
| ATOM | 1474 | CA  | GLU | 93 | -9.778  | -9.254  | 8.466  | 1.00 | 0.00 |
| ATOM | 1475 | HA  | GLU | 93 | -9.980  | -9.955  | 9.275  | 1.00 | 0.00 |
| ATOM | 1476 | CB  | GLU | 93 | -10.418 | -7.904  | 8.815  | 1.00 | 0.00 |
| ATOM | 1477 | HB2 | GLU | 93 | -9.893  | -7.117  | 8.272  | 1.00 | 0.00 |
| ATOM | 1478 | HB3 | GLU | 93 | -11.463 | -7.922  | 8.505  | 1.00 | 0.00 |
| ATOM | 1479 | CG  | GLU | 93 | -10.336 | -7.627  | 10.324 | 1.00 | 0.00 |
| ATOM | 1480 | HG2 | GLU | 93 | -9.944  | -8.521  | 10.809 | 1.00 | 0.00 |
| ATOM | 1481 | HG3 | GLU | 93 | -9.664  | -6.789  | 10.509 | 1.00 | 0.00 |
| ATOM | 1482 | CD  | GLU | 93 | -11.720 | -7.305  | 10.890 | 1.00 | 0.00 |
| ATOM | 1483 | OE1 | GLU | 93 | -12.339 | -6.342  | 10.377 | 1.00 | 0.00 |
| ATOM | 1484 | OE2 | GLU | 93 | -12.132 | -8.007  | 11.838 | 1.00 | 0.00 |
| ATOM | 1485 | C   | GLU | 93 | -10.429 | -9.804  | 7.199  | 1.00 | 0.00 |
| ATOM | 1486 | O   | GLU | 93 | -11.528 | -10.343 | 7.247  | 1.00 | 0.00 |
| ATOM | 1487 | N   | CYX | 94 | -9.736  | -9.683  | 6.063  | 1.00 | 0.00 |
| ATOM | 1488 | H   | CYX | 94 | -8.904  | -9.109  | 6.049  | 1.00 | 0.00 |
| ATOM | 1489 | CA  | CYX | 94 | -10.175 | -10.276 | 4.828  | 1.00 | 0.00 |
| ATOM | 1490 | HA  | CYX | 94 | -11.260 | -10.379 | 4.822  | 1.00 | 0.00 |
| ATOM | 1491 | CB  | CYX | 94 | -9.765  | -9.383  | 3.661  | 1.00 | 0.00 |
| ATOM | 1492 | HB2 | CYX | 94 | -8.823  | -8.887  | 3.895  | 1.00 | 0.00 |
| ATOM | 1493 | HB3 | CYX | 94 | -9.642  | -9.990  | 2.764  | 1.00 | 0.00 |
| ATOM | 1494 | SG  | CYX | 94 | -11.027 | -8.133  | 3.264  | 1.00 | 0.00 |
| ATOM | 1495 | C   | CYX | 94 | -9.639  | -11.683 | 4.663  | 1.00 | 0.00 |



|      |      |      |     |    |         |         |       |      |      |
|------|------|------|-----|----|---------|---------|-------|------|------|
| ATOM | 1496 | O    | CYX | 94 | -10.091 | -12.333 | 3.727 | 1.00 | 0.00 |
| ATOM | 1497 | N    | ASN | 95 | -8.677  | -12.108 | 5.497 | 1.00 | 0.00 |
| ATOM | 1498 | H    | ASN | 95 | -8.362  | -11.427 | 6.173 | 1.00 | 0.00 |
| ATOM | 1499 | CA   | ASN | 95 | -8.032  | -13.410 | 5.478 | 1.00 | 0.00 |
| ATOM | 1500 | HA   | ASN | 95 | -7.591  | -13.626 | 6.451 | 1.00 | 0.00 |
| ATOM | 1501 | CB   | ASN | 95 | -9.067  | -14.493 | 5.158 | 1.00 | 0.00 |
| ATOM | 1502 | HB2  | ASN | 95 | -10.012 | -14.182 | 5.602 | 1.00 | 0.00 |
| ATOM | 1503 | HB3  | ASN | 95 | -9.193  | -14.609 | 4.081 | 1.00 | 0.00 |
| ATOM | 1504 | CG   | ASN | 95 | -8.675  | -15.820 | 5.742 | 1.00 | 0.00 |
| ATOM | 1505 | OD1  | ASN | 95 | -9.412  | -16.416 | 6.500 | 1.00 | 0.00 |
| ATOM | 1506 | ND2  | ASN | 95 | -7.488  | -16.287 | 5.438 | 1.00 | 0.00 |
| ATOM | 1507 | HD21 | ASN | 95 | -7.188  | -17.176 | 5.811 | 1.00 | 0.00 |
| ATOM | 1508 | HD22 | ASN | 95 | -6.879  | -15.755 | 4.832 | 1.00 | 0.00 |
| ATOM | 1509 | C    | ASN | 95 | -6.893  | -13.382 | 4.440 | 1.00 | 0.00 |
| ATOM | 1510 | O    | ASN | 95 | -6.534  | -14.360 | 3.808 | 1.00 | 0.00 |
| ATOM | 1511 | N    | LEU | 96 | -6.356  | -12.228 | 4.123 | 1.00 | 0.00 |
| ATOM | 1512 | H    | LEU | 96 | -6.738  | -11.396 | 4.549 | 1.00 | 0.00 |
| ATOM | 1513 | CA   | LEU | 96 | -5.333  | -12.074 | 3.128 | 1.00 | 0.00 |
| ATOM | 1514 | HA   | LEU | 96 | -5.504  | -12.785 | 2.320 | 1.00 | 0.00 |
| ATOM | 1515 | CB   | LEU | 96 | -5.333  | -10.673 | 2.548 | 1.00 | 0.00 |
| ATOM | 1516 | HB2  | LEU | 96 | -4.919  | -10.080 | 3.363 | 1.00 | 0.00 |
| ATOM | 1517 | HB3  | LEU | 96 | -4.675  | -10.606 | 1.681 | 1.00 | 0.00 |

|      |      |      |     |    |        |         |       |      |      |
|------|------|------|-----|----|--------|---------|-------|------|------|
| ATOM | 1518 | CG   | LEU | 96 | -6.717 | -10.137 | 2.180 | 1.00 | 0.00 |
| ATOM | 1519 | HG   | LEU | 96 | -7.366 | -10.206 | 3.052 | 1.00 | 0.00 |
| ATOM | 1520 | CD1  | LEU | 96 | -6.629 | -8.702  | 1.734 | 1.00 | 0.00 |
| ATOM | 1521 | HD11 | LEU | 96 | -5.980 | -8.631  | 0.861 | 1.00 | 0.00 |
| ATOM | 1522 | HD12 | LEU | 96 | -7.624 | -8.339  | 1.476 | 1.00 | 0.00 |
| ATOM | 1523 | HD13 | LEU | 96 | -6.219 | -8.094  | 2.540 | 1.00 | 0.00 |
| ATOM | 1524 | CD2  | LEU | 96 | -7.418 | -10.999 | 1.150 | 1.00 | 0.00 |
| ATOM | 1525 | HD21 | LEU | 96 | -7.543 | -12.007 | 1.543 | 1.00 | 0.00 |
| ATOM | 1526 | HD22 | LEU | 96 | -8.396 | -10.573 | 0.924 | 1.00 | 0.00 |
| ATOM | 1527 | HD23 | LEU | 96 | -6.820 | -11.036 | 0.239 | 1.00 | 0.00 |
| ATOM | 1528 | C    | LEU | 96 | -4.033 | -12.473 | 3.779 | 1.00 | 0.00 |
| ATOM | 1529 | O    | LEU | 96 | -3.480 | -13.489 | 3.410 | 1.00 | 0.00 |
| ATOM | 1530 | N    | MET | 97 | -3.651 | -11.770 | 4.843 | 1.00 | 0.00 |
| ATOM | 1531 | H    | MET | 97 | -4.222 | -10.988 | 5.130 | 1.00 | 0.00 |
| ATOM | 1532 | CA   | MET | 97 | -2.423 | -12.022 | 5.560 | 1.00 | 0.00 |
| ATOM | 1533 | HA   | MET | 97 | -1.912 | -12.889 | 5.143 | 1.00 | 0.00 |
| ATOM | 1534 | CB   | MET | 97 | -1.508 | -10.812 | 5.435 | 1.00 | 0.00 |
| ATOM | 1535 | HB2  | MET | 97 | -0.537 | -11.077 | 5.852 | 1.00 | 0.00 |
| ATOM | 1536 | HB3  | MET | 97 | -1.397 | -10.580 | 4.375 | 1.00 | 0.00 |
| ATOM | 1537 | CG   | MET | 97 | -2.055 | -9.601  | 6.162 | 1.00 | 0.00 |
| ATOM | 1538 | HG2  | MET | 97 | -2.203 | -8.806  | 5.430 | 1.00 | 0.00 |
| ATOM | 1539 | HG3  | MET | 97 | -3.015 | -9.874  | 6.599 | 1.00 | 0.00 |

|      |      |     |     |    |        |         |        |      |      |
|------|------|-----|-----|----|--------|---------|--------|------|------|
| ATOM | 1540 | SD  | MET | 97 | -0.952 | -9.008  | 7.471  | 1.00 | 0.00 |
| ATOM | 1541 | CE  | MET | 97 | 0.521  | -8.726  | 6.466  | 1.00 | 0.00 |
| ATOM | 1542 | HE1 | MET | 97 | 0.298  | -7.992  | 5.691  | 1.00 | 0.00 |
| ATOM | 1543 | HE2 | MET | 97 | 1.327  | -8.352  | 7.098  | 1.00 | 0.00 |
| ATOM | 1544 | HE3 | MET | 97 | 0.829  | -9.662  | 6.000  | 1.00 | 0.00 |
| ATOM | 1545 | C   | MET | 97 | -2.652 | -12.365 | 6.997  | 1.00 | 0.00 |
| ATOM | 1546 | O   | MET | 97 | -1.750 | -12.096 | 7.781  | 1.00 | 0.00 |
| ATOM | 1547 | N   | SER | 98 | -3.853 | -12.871 | 7.318  | 1.00 | 0.00 |
| ATOM | 1548 | H   | SER | 98 | -4.537 | -12.971 | 6.581  | 1.00 | 0.00 |
| ATOM | 1549 | CA  | SER | 98 | -4.250 | -13.209 | 8.682  | 1.00 | 0.00 |
| ATOM | 1550 | HA  | SER | 98 | -4.575 | -12.306 | 9.200  | 1.00 | 0.00 |
| ATOM | 1551 | CB  | SER | 98 | -5.393 | -14.211 | 8.688  | 1.00 | 0.00 |
| ATOM | 1552 | HB2 | SER | 98 | -5.667 | -14.420 | 9.721  | 1.00 | 0.00 |
| ATOM | 1553 | HB3 | SER | 98 | -6.244 | -13.771 | 8.168  | 1.00 | 0.00 |
| ATOM | 1554 | OG  | SER | 98 | -5.019 | -15.418 | 8.045  | 1.00 | 0.00 |
| ATOM | 1555 | HG  | SER | 98 | -5.757 | -16.031 | 8.062  | 1.00 | 0.00 |
| ATOM | 1556 | C   | SER | 98 | -3.088 | -13.748 | 9.533  | 1.00 | 0.00 |
| ATOM | 1557 | O   | SER | 98 | -2.492 | -13.113 | 10.391 | 1.00 | 0.00 |
| ATOM | 1558 | N   | GLN | 99 | -2.632 | -14.934 | 9.218  | 1.00 | 0.00 |
| ATOM | 1559 | H   | GLN | 99 | -3.181 | -15.505 | 8.591  | 1.00 | 0.00 |
| ATOM | 1560 | CA  | GLN | 99 | -1.424 | -15.496 | 9.776  | 1.00 | 0.00 |
| ATOM | 1561 | HA  | GLN | 99 | -0.631 | -14.755 | 9.881  | 1.00 | 0.00 |

|      |      |      |     |     |        |         |        |      |      |
|------|------|------|-----|-----|--------|---------|--------|------|------|
| ATOM | 1562 | CB   | GLN | 99  | -1.818 | -15.986 | 11.161 | 1.00 | 0.00 |
| ATOM | 1563 | HB2  | GLN | 99  | -2.822 | -15.634 | 11.398 | 1.00 | 0.00 |
| ATOM | 1564 | HB3  | GLN | 99  | -1.801 | -17.075 | 11.179 | 1.00 | 0.00 |
| ATOM | 1565 | CG   | GLN | 99  | -0.837 | -15.447 | 12.188 | 1.00 | 0.00 |
| ATOM | 1566 | HG2  | GLN | 99  | 0.010  | -16.130 | 12.242 | 1.00 | 0.00 |
| ATOM | 1567 | HG3  | GLN | 99  | -0.487 | -14.457 | 11.893 | 1.00 | 0.00 |
| ATOM | 1568 | CD   | GLN | 99  | -1.470 | -15.347 | 13.565 | 1.00 | 0.00 |
| ATOM | 1569 | OE1  | GLN | 99  | -2.550 | -15.828 | 13.858 | 1.00 | 0.00 |
| ATOM | 1570 | NE2  | GLN | 99  | -0.794 | -14.672 | 14.467 | 1.00 | 0.00 |
| ATOM | 1571 | HE21 | GLN | 99  | -1.165 | -14.571 | 15.401 | 1.00 | 0.00 |
| ATOM | 1572 | HE22 | GLN | 99  | 0.094  | -14.256 | 14.222 | 1.00 | 0.00 |
| ATOM | 1573 | C    | GLN | 99  | -0.855 | -16.590 | 8.875  | 1.00 | 0.00 |
| ATOM | 1574 | O    | GLN | 99  | -0.669 | -17.736 | 9.282  | 1.00 | 0.00 |
| ATOM | 1575 | N    | PRO | 100 | -0.618 | -16.267 | 7.595  | 1.00 | 0.00 |
| ATOM | 1576 | CD   | PRO | 100 | -0.767 | -14.971 | 6.963  | 1.00 | 0.00 |
| ATOM | 1577 | HD2  | PRO | 100 | -0.024 | -14.305 | 7.402  | 1.00 | 0.00 |
| ATOM | 1578 | HD3  | PRO | 100 | -1.766 | -14.605 | 7.198  | 1.00 | 0.00 |
| ATOM | 1579 | CG   | PRO | 100 | -0.561 | -15.171 | 5.480  | 1.00 | 0.00 |
| ATOM | 1580 | HG2  | PRO | 100 | 0.292  | -14.574 | 5.157  | 1.00 | 0.00 |
| ATOM | 1581 | HG3  | PRO | 100 | -1.455 | -14.840 | 4.950  | 1.00 | 0.00 |
| ATOM | 1582 | CB   | PRO | 100 | -0.317 | -16.649 | 5.259  | 1.00 | 0.00 |
| ATOM | 1583 | HB2  | PRO | 100 | 0.580  | -16.767 | 4.651  | 1.00 | 0.00 |

|      |      |         |     |        |         |        |      |      |
|------|------|---------|-----|--------|---------|--------|------|------|
| ATOM | 1584 | HB3 PRO | 100 | -1.152 | -17.156 | 4.776  | 1.00 | 0.00 |
| ATOM | 1585 | CA PRO  | 100 | -0.082 | -17.241 | 6.657  | 1.00 | 0.00 |
| ATOM | 1586 | HA PRO  | 100 | -0.634 | -18.175 | 6.759  | 1.00 | 0.00 |
| ATOM | 1587 | C PRO   | 100 | 1.400  | -17.492 | 6.938  | 1.00 | 0.00 |
| ATOM | 1588 | O PRO   | 100 | 1.785  | -18.612 | 7.255  | 1.00 | 0.00 |
| ATOM | 1589 | N CYX   | 101 | 2.232  | -16.467 | 6.762  | 1.00 | 0.00 |
| ATOM | 1590 | H CYX   | 101 | 1.880  | -15.593 | 6.397  | 1.00 | 0.00 |
| ATOM | 1591 | CA CYX  | 101 | 3.647  | -16.584 | 7.005  | 1.00 | 0.00 |
| ATOM | 1592 | HA CYX  | 101 | 4.025  | -17.512 | 6.576  | 1.00 | 0.00 |
| ATOM | 1593 | CB CYX  | 101 | 4.385  | -15.412 | 6.360  | 1.00 | 0.00 |
| ATOM | 1594 | HB2 CYX | 101 | 4.400  | -14.567 | 7.049  | 1.00 | 0.00 |
| ATOM | 1595 | HB3 CYX | 101 | 5.408  | -15.709 | 6.127  | 1.00 | 0.00 |
| ATOM | 1596 | SG CYX  | 101 | 3.637  | -14.775 | 4.810  | 1.00 | 0.00 |
| ATOM | 1597 | C CYX   | 101 | 3.869  | -16.662 | 8.508  | 1.00 | 0.00 |
| ATOM | 1598 | O CYX   | 101 | 3.401  | -15.791 | 9.246  | 1.00 | 0.00 |
| ATOM | 1599 | N GLN   | 102 | 4.589  | -17.683 | 8.943  | 1.00 | 0.00 |
| ATOM | 1600 | H GLN   | 102 | 4.887  | -18.387 | 8.283  | 1.00 | 0.00 |
| ATOM | 1601 | CA GLN  | 102 | 4.909  | -17.874 | 10.348 | 1.00 | 0.00 |
| ATOM | 1602 | HA GLN  | 102 | 4.593  | -17.004 | 10.923 | 1.00 | 0.00 |
| ATOM | 1603 | CB GLN  | 102 | 4.187  | -19.107 | 10.890 | 1.00 | 0.00 |
| ATOM | 1604 | HB2 GLN | 102 | 4.508  | -19.981 | 10.323 | 1.00 | 0.00 |
| ATOM | 1605 | HB3 GLN | 102 | 4.452  | -19.238 | 11.939 | 1.00 | 0.00 |

|      |      |      |     |     |        |         |        |      |      |
|------|------|------|-----|-----|--------|---------|--------|------|------|
| ATOM | 1606 | CG   | GLN | 102 | 2.669  | -18.945 | 10.763 | 1.00 | 0.00 |
| ATOM | 1607 | HG2  | GLN | 102 | 2.431  | -17.892 | 10.915 | 1.00 | 0.00 |
| ATOM | 1608 | HG3  | GLN | 102 | 2.329  | -19.254 | 9.774  | 1.00 | 0.00 |
| ATOM | 1609 | CD   | GLN | 102 | 1.936  | -19.763 | 11.805 | 1.00 | 0.00 |
| ATOM | 1610 | OE1  | GLN | 102 | 1.940  | -19.460 | 12.985 | 1.00 | 0.00 |
| ATOM | 1611 | NE2  | GLN | 102 | 1.317  | -20.845 | 11.391 | 1.00 | 0.00 |
| ATOM | 1612 | HE21 | GLN | 102 | 0.816  | -21.420 | 12.052 | 1.00 | 0.00 |
| ATOM | 1613 | HE22 | GLN | 102 | 1.346  | -21.096 | 10.413 | 1.00 | 0.00 |
| ATOM | 1614 | C    | GLN | 102 | 6.413  | -17.983 | 10.539 | 1.00 | 0.00 |
| ATOM | 1615 | O    | GLN | 102 | 7.175  | -17.838 | 9.578  | 1.00 | 0.00 |
| ATOM | 1616 | N    | MET | 103 | 6.827  | -18.160 | 11.792 | 1.00 | 0.00 |
| ATOM | 1617 | H    | MET | 103 | 6.149  | -18.097 | 12.538 | 1.00 | 0.00 |
| ATOM | 1618 | CA   | MET | 103 | 8.227  | -18.360 | 12.145 | 1.00 | 0.00 |
| ATOM | 1619 | HA   | MET | 103 | 8.891  | -17.961 | 11.377 | 1.00 | 0.00 |
| ATOM | 1620 | CB   | MET | 103 | 8.479  | -17.602 | 13.452 | 1.00 | 0.00 |
| ATOM | 1621 | HB2  | MET | 103 | 7.617  | -16.969 | 13.662 | 1.00 | 0.00 |
| ATOM | 1622 | HB3  | MET | 103 | 8.604  | -18.324 | 14.258 | 1.00 | 0.00 |
| ATOM | 1623 | CG   | MET | 103 | 9.734  | -16.735 | 13.347 | 1.00 | 0.00 |
| ATOM | 1624 | HG2  | MET | 103 | 10.068 | -16.727 | 12.309 | 1.00 | 0.00 |
| ATOM | 1625 | HG3  | MET | 103 | 9.485  | -15.719 | 13.655 | 1.00 | 0.00 |
| ATOM | 1626 | SD   | MET | 103 | 11.068 | -17.366 | 14.397 | 1.00 | 0.00 |
| ATOM | 1627 | CE   | MET | 103 | 11.385 | -15.893 | 15.381 | 1.00 | 0.00 |

|      |      |     |     |     |        |         |        |      |      |
|------|------|-----|-----|-----|--------|---------|--------|------|------|
| ATOM | 1628 | HE1 | MET | 103 | 10.481 | -15.616 | 15.923 | 1.00 | 0.00 |
| ATOM | 1629 | HE2 | MET | 103 | 12.186 | -16.095 | 16.091 | 1.00 | 0.00 |
| ATOM | 1630 | HE3 | MET | 103 | 11.680 | -15.073 | 14.725 | 1.00 | 0.00 |
| ATOM | 1631 | C   | MET | 103 | 8.627  | -19.846 | 12.263 | 1.00 | 0.00 |
| ATOM | 1632 | O   | MET | 103 | 7.745  | -20.611 | 12.732 | 1.00 | 0.00 |
| ATOM | 1633 | OXT | MET | 103 | 9.799  | -20.121 | 11.907 | 1.00 | 0.00 |
| TER  |      |     |     |     |        |         |        |      |      |
| ATOM | 1634 | CI1 | LIG | 104 | 18.896 | -14.108 | -2.396 | 1.00 | 0.00 |
| ATOM | 1635 | CI2 | LIG | 104 | 19.906 | -16.805 | -3.021 | 1.00 | 0.00 |
| ATOM | 1636 | P1  | LIG | 104 | 17.759 | -18.153 | 0.825  | 1.00 | 0.00 |
| ATOM | 1637 | O1  | LIG | 104 | 17.279 | -19.620 | 0.423  | 1.00 | 0.00 |
| ATOM | 1638 | O2  | LIG | 104 | 19.075 | -18.445 | 1.659  | 1.00 | 0.00 |
| ATOM | 1639 | O3  | LIG | 104 | 18.288 | -17.603 | -0.635 | 1.00 | 0.00 |
| ATOM | 1640 | O4  | LIG | 104 | 16.806 | -17.241 | 1.473  | 1.00 | 0.00 |
| ATOM | 1641 | C1  | LIG | 104 | 16.084 | -19.834 | -0.363 | 1.00 | 0.00 |
| ATOM | 1642 | H1  | LIG | 104 | 15.922 | -20.910 | -0.370 | 1.00 | 0.00 |
| ATOM | 1643 | H2  | LIG | 104 | 16.239 | -19.473 | -1.381 | 1.00 | 0.00 |
| ATOM | 1644 | H3  | LIG | 104 | 15.234 | -19.330 | 0.098  | 1.00 | 0.00 |
| ATOM | 1645 | C2  | LIG | 104 | 20.136 | -19.316 | 1.203  | 1.00 | 0.00 |
| ATOM | 1646 | H4  | LIG | 104 | 20.517 | -18.976 | 0.239  | 1.00 | 0.00 |
| ATOM | 1647 | H5  | LIG | 104 | 19.769 | -20.340 | 1.127  | 1.00 | 0.00 |
| ATOM | 1648 | H6  | LIG | 104 | 20.916 | -19.249 | 1.958  | 1.00 | 0.00 |

|      |      |     |     |     |         |         |        |      |      |
|------|------|-----|-----|-----|---------|---------|--------|------|------|
| ATOM | 1649 | C3  | LIG | 104 | 18.275  | -16.266 | -0.936 | 1.00 | 0.00 |
| ATOM | 1650 | H7  | LIG | 104 | 17.679  | -15.624 | -0.299 | 1.00 | 0.00 |
| ATOM | 1651 | C4  | LIG | 104 | 18.948  | -15.797 | -1.985 | 1.00 | 0.00 |
| TER  |      |     |     |     |         |         |        |      |      |
| ATOM | 1652 | Cl1 | LIG | 105 | -21.281 | 13.694  | 4.827  | 1.00 | 0.00 |
| ATOM | 1653 | Cl2 | LIG | 105 | -20.821 | 14.356  | 7.662  | 1.00 | 0.00 |
| ATOM | 1654 | P1  | LIG | 105 | -22.621 | 18.476  | 6.660  | 1.00 | 0.00 |
| ATOM | 1655 | O1  | LIG | 105 | -23.385 | 18.827  | 8.016  | 1.00 | 0.00 |
| ATOM | 1656 | O2  | LIG | 105 | -21.271 | 19.292  | 6.813  | 1.00 | 0.00 |
| ATOM | 1657 | O3  | LIG | 105 | -22.211 | 16.907  | 6.948  | 1.00 | 0.00 |
| ATOM | 1658 | O4  | LIG | 105 | -23.316 | 18.664  | 5.379  | 1.00 | 0.00 |
| ATOM | 1659 | C1  | LIG | 105 | -24.693 | 18.285  | 8.307  | 1.00 | 0.00 |
| ATOM | 1660 | H1  | LIG | 105 | -25.030 | 18.787  | 9.211  | 1.00 | 0.00 |
| ATOM | 1661 | H2  | LIG | 105 | -24.621 | 17.210  | 8.482  | 1.00 | 0.00 |
| ATOM | 1662 | H3  | LIG | 105 | -25.380 | 18.493  | 7.486  | 1.00 | 0.00 |
| ATOM | 1663 | C2  | LIG | 105 | -20.438 | 19.250  | 7.995  | 1.00 | 0.00 |
| ATOM | 1664 | H4  | LIG | 105 | -20.140 | 18.222  | 8.211  | 1.00 | 0.00 |
| ATOM | 1665 | H5  | LIG | 105 | -20.975 | 19.676  | 8.843  | 1.00 | 0.00 |
| ATOM | 1666 | H6  | LIG | 105 | -19.564 | 19.851  | 7.760  | 1.00 | 0.00 |
| ATOM | 1667 | C3  | LIG | 105 | -22.046 | 16.017  | 5.918  | 1.00 | 0.00 |
| ATOM | 1668 | H7  | LIG | 105 | -22.436 | 16.307  | 4.950  | 1.00 | 0.00 |
| ATOM | 1669 | C4  | LIG | 105 | -21.452 | 14.843  | 6.121  | 1.00 | 0.00 |



TER

|      |      |     |     |     |        |        |       |      |      |
|------|------|-----|-----|-----|--------|--------|-------|------|------|
| ATOM | 1670 | Cl1 | LIG | 106 | 12.338 | 21.479 | 6.781 | 1.00 | 0.00 |
| ATOM | 1671 | Cl2 | LIG | 106 | 13.902 | 23.854 | 7.555 | 1.00 | 0.00 |
| ATOM | 1672 | P1  | LIG | 106 | 15.880 | 23.507 | 3.410 | 1.00 | 0.00 |
| ATOM | 1673 | O1  | LIG | 106 | 16.114 | 25.042 | 3.041 | 1.00 | 0.00 |
| ATOM | 1674 | O2  | LIG | 106 | 17.307 | 23.066 | 3.940 | 1.00 | 0.00 |
| ATOM | 1675 | O3  | LIG | 106 | 14.949 | 23.665 | 4.760 | 1.00 | 0.00 |
| ATOM | 1676 | O4  | LIG | 106 | 15.290 | 22.612 | 2.405 | 1.00 | 0.00 |
| ATOM | 1677 | C1  | LIG | 106 | 15.050 | 25.860 | 2.505 | 1.00 | 0.00 |
| ATOM | 1678 | H1  | LIG | 106 | 15.513 | 26.802 | 2.220 | 1.00 | 0.00 |
| ATOM | 1679 | H2  | LIG | 106 | 14.292 | 26.033 | 3.271 | 1.00 | 0.00 |
| ATOM | 1680 | H3  | LIG | 106 | 14.608 | 25.380 | 1.631 | 1.00 | 0.00 |
| ATOM | 1681 | C2  | LIG | 106 | 18.060 | 23.809 | 4.927 | 1.00 | 0.00 |
| ATOM | 1682 | H4  | LIG | 106 | 17.475 | 23.926 | 5.840 | 1.00 | 0.00 |
| ATOM | 1683 | H5  | LIG | 106 | 18.337 | 24.784 | 4.526 | 1.00 | 0.00 |
| ATOM | 1684 | H6  | LIG | 106 | 18.949 | 23.216 | 5.126 | 1.00 | 0.00 |
| ATOM | 1685 | C3  | LIG | 106 | 14.053 | 22.693 | 5.120 | 1.00 | 0.00 |
| ATOM | 1686 | H7  | LIG | 106 | 13.797 | 21.957 | 4.369 | 1.00 | 0.00 |
| ATOM | 1687 | C4  | LIG | 106 | 13.510 | 22.685 | 6.336 | 1.00 | 0.00 |

TER

|      |      |     |     |     |        |         |        |      |      |
|------|------|-----|-----|-----|--------|---------|--------|------|------|
| ATOM | 1688 | Cl1 | LIG | 107 | 21.486 | -10.672 | 17.327 | 1.00 | 0.00 |
| ATOM | 1689 | Cl2 | LIG | 107 | 22.779 | -8.035  | 17.081 | 1.00 | 0.00 |

|      |      |     |     |     |        |        |         |      |      |
|------|------|-----|-----|-----|--------|--------|---------|------|------|
| ATOM | 1690 | P1  | LIG | 107 | 22.132 | -7.650 | 21.626  | 1.00 | 0.00 |
| ATOM | 1691 | O1  | LIG | 107 | 23.432 | -6.834 | 22.063  | 1.00 | 0.00 |
| ATOM | 1692 | O2  | LIG | 107 | 21.031 | -6.513 | 21.543  | 1.00 | 0.00 |
| ATOM | 1693 | O3  | LIG | 107 | 22.512 | -7.996 | 20.060  | 1.00 | 0.00 |
| ATOM | 1694 | O4  | LIG | 107 | 21.739 | -8.837 | 22.398  | 1.00 | 0.00 |
| ATOM | 1695 | C1  | LIG | 107 | 24.704 | -7.492 | 22.262  | 1.00 | 0.00 |
| ATOM | 1696 | H1  | LIG | 107 | 25.366 | -6.738 | 22.683  | 1.00 | 0.00 |
| ATOM | 1697 | H2  | LIG | 107 | 25.096 | -7.842 | 21.306  | 1.00 | 0.00 |
| ATOM | 1698 | H3  | LIG | 107 | 24.594 | -8.324 | 22.959  | 1.00 | 0.00 |
| ATOM | 1699 | C2  | LIG | 107 | 21.219 | -5.266 | 20.835  | 1.00 | 0.00 |
| ATOM | 1700 | H4  | LIG | 107 | 21.465 | -5.457 | 19.790  | 1.00 | 0.00 |
| ATOM | 1701 | H5  | LIG | 107 | 22.009 | -4.684 | 21.311  | 1.00 | 0.00 |
| ATOM | 1702 | H6  | LIG | 107 | 20.269 | -4.742 | 20.907  | 1.00 | 0.00 |
| ATOM | 1703 | C3  | LIG | 107 | 22.008 | -9.108 | 19.438  | 1.00 | 0.00 |
| ATOM | 1704 | H7  | LIG | 107 | 21.572 | -9.871 | 20.070  | 1.00 | 0.00 |
| ATOM | 1705 | C4  | LIG | 107 | 22.084 | -9.242 | 18.115  | 1.00 | 0.00 |
| TER  |      |     |     |     |        |        |         |      |      |
| ATOM | 1706 | Cl1 | LIG | 108 | 11.246 | 12.468 | -12.877 | 1.00 | 0.00 |
| ATOM | 1707 | Cl2 | LIG | 108 | 13.738 | 11.751 | -11.476 | 1.00 | 0.00 |
| ATOM | 1708 | P1  | LIG | 108 | 15.645 | 11.504 | -15.661 | 1.00 | 0.00 |
| ATOM | 1709 | O1  | LIG | 108 | 17.124 | 12.025 | -15.367 | 1.00 | 0.00 |
| ATOM | 1710 | O2  | LIG | 108 | 15.836 | 9.930  | -15.667 | 1.00 | 0.00 |

|      |      |     |     |     |        |         |         |      |      |
|------|------|-----|-----|-----|--------|---------|---------|------|------|
| ATOM | 1711 | O3  | LIG | 108 | 14.919 | 11.844  | -14.222 | 1.00 | 0.00 |
| ATOM | 1712 | O4  | LIG | 108 | 14.914 | 12.042  | -16.816 | 1.00 | 0.00 |
| ATOM | 1713 | C1  | LIG | 108 | 17.423 | 13.436  | -15.274 | 1.00 | 0.00 |
| ATOM | 1714 | H1  | LIG | 108 | 18.506 | 13.508  | -15.209 | 1.00 | 0.00 |
| ATOM | 1715 | H2  | LIG | 108 | 16.965 | 13.855  | -14.377 | 1.00 | 0.00 |
| ATOM | 1716 | H3  | LIG | 108 | 17.067 | 13.957  | -16.164 | 1.00 | 0.00 |
| ATOM | 1717 | C2  | LIG | 108 | 16.529 | 9.203   | -14.625 | 1.00 | 0.00 |
| ATOM | 1718 | H4  | LIG | 108 | 16.068 | 9.400   | -13.656 | 1.00 | 0.00 |
| ATOM | 1719 | H5  | LIG | 108 | 17.581 | 9.489   | -14.611 | 1.00 | 0.00 |
| ATOM | 1720 | H6  | LIG | 108 | 16.426 | 8.152   | -14.883 | 1.00 | 0.00 |
| ATOM | 1721 | C3  | LIG | 108 | 13.574 | 12.100  | -14.150 | 1.00 | 0.00 |
| ATOM | 1722 | H7  | LIG | 108 | 13.065 | 12.320  | -15.079 | 1.00 | 0.00 |
| ATOM | 1723 | C4  | LIG | 108 | 12.943 | 12.099  | -12.977 | 1.00 | 0.00 |
| TER  |      |     |     |     |        |         |         |      |      |
| ATOM | 1724 | Cl1 | LIG | 109 | 22.304 | -18.542 | -22.331 | 1.00 | 0.00 |
| ATOM | 1725 | Cl2 | LIG | 109 | 20.576 | -16.227 | -21.746 | 1.00 | 0.00 |
| ATOM | 1726 | P1  | LIG | 109 | 19.199 | -18.596 | -18.043 | 1.00 | 0.00 |
| ATOM | 1727 | O1  | LIG | 109 | 18.971 | -17.425 | -16.984 | 1.00 | 0.00 |
| ATOM | 1728 | O2  | LIG | 109 | 17.727 | -18.876 | -18.559 | 1.00 | 0.00 |
| ATOM | 1729 | O3  | LIG | 109 | 19.930 | -17.759 | -19.259 | 1.00 | 0.00 |
| ATOM | 1730 | O4  | LIG | 109 | 19.950 | -19.792 | -17.636 | 1.00 | 0.00 |
| ATOM | 1731 | C1  | LIG | 109 | 20.074 | -16.846 | -16.250 | 1.00 | 0.00 |

|      |      |    |     |     |        |         |         |      |      |
|------|------|----|-----|-----|--------|---------|---------|------|------|
| ATOM | 1732 | H1 | LIG | 109 | 19.625 | -16.183 | -15.513 | 1.00 | 0.00 |
| ATOM | 1733 | H2 | LIG | 109 | 20.713 | -16.276 | -16.926 | 1.00 | 0.00 |
| ATOM | 1734 | H3 | LIG | 109 | 20.646 | -17.628 | -15.750 | 1.00 | 0.00 |
| ATOM | 1735 | C2 | LIG | 109 | 16.823 | -17.838 | -19.004 | 1.00 | 0.00 |
| ATOM | 1736 | H4 | LIG | 109 | 17.273 | -17.267 | -19.817 | 1.00 | 0.00 |
| ATOM | 1737 | H5 | LIG | 109 | 16.574 | -17.181 | -18.170 | 1.00 | 0.00 |
| ATOM | 1738 | H6 | LIG | 109 | 15.933 | -18.355 | -19.357 | 1.00 | 0.00 |
| ATOM | 1739 | C3 | LIG | 109 | 20.798 | -18.375 | -20.123 | 1.00 | 0.00 |
| ATOM | 1740 | H7 | LIG | 109 | 21.178 | -19.346 | -19.829 | 1.00 | 0.00 |
| ATOM | 1741 | C4 | LIG | 109 | 21.168 | -17.782 | -21.255 | 1.00 | 0.00 |

TER

|      |      |     |     |     |         |       |         |      |      |
|------|------|-----|-----|-----|---------|-------|---------|------|------|
| ATOM | 1742 | Cl1 | LIG | 110 | -10.189 | 7.135 | -13.254 | 1.00 | 0.00 |
| ATOM | 1743 | Cl2 | LIG | 110 | -7.755  | 5.717 | -12.388 | 1.00 | 0.00 |
| ATOM | 1744 | P1  | LIG | 110 | -6.706  | 5.443 | -16.865 | 1.00 | 0.00 |
| ATOM | 1745 | O1  | LIG | 110 | -5.116  | 5.569 | -16.826 | 1.00 | 0.00 |
| ATOM | 1746 | O2  | LIG | 110 | -6.917  | 3.878 | -16.992 | 1.00 | 0.00 |
| ATOM | 1747 | O3  | LIG | 110 | -7.070  | 5.801 | -15.298 | 1.00 | 0.00 |
| ATOM | 1748 | O4  | LIG | 110 | -7.464  | 6.251 | -17.830 | 1.00 | 0.00 |
| ATOM | 1749 | C1  | LIG | 110 | -4.463  | 6.854 | -16.714 | 1.00 | 0.00 |
| ATOM | 1750 | H1  | LIG | 110 | -3.401  | 6.662 | -16.849 | 1.00 | 0.00 |
| ATOM | 1751 | H2  | LIG | 110 | -4.643  | 7.278 | -15.724 | 1.00 | 0.00 |
| ATOM | 1752 | H3  | LIG | 110 | -4.823  | 7.530 | -17.491 | 1.00 | 0.00 |

|      |      |    |     |     |        |       |         |      |      |
|------|------|----|-----|-----|--------|-------|---------|------|------|
| ATOM | 1753 | C2 | LIG | 110 | -6.262 | 2.908 | -16.141 | 1.00 | 0.00 |
| ATOM | 1754 | H4 | LIG | 110 | -6.489 | 3.111 | -15.093 | 1.00 | 0.00 |
| ATOM | 1755 | H5 | LIG | 110 | -5.185 | 2.935 | -16.309 | 1.00 | 0.00 |
| ATOM | 1756 | H6 | LIG | 110 | -6.667 | 1.942 | -16.432 | 1.00 | 0.00 |
| ATOM | 1757 | C3 | LIG | 110 | -8.276 | 6.358 | -14.960 | 1.00 | 0.00 |
| ATOM | 1758 | H7 | LIG | 110 | -8.864 | 6.783 | -15.764 | 1.00 | 0.00 |
| ATOM | 1759 | C4 | LIG | 110 | -8.680 | 6.389 | -13.692 | 1.00 | 0.00 |

TER

|      |      |     |     |     |         |         |         |      |      |
|------|------|-----|-----|-----|---------|---------|---------|------|------|
| ATOM | 1760 | Cl1 | LIG | 111 | -13.456 | -25.378 | -12.460 | 1.00 | 0.00 |
| ATOM | 1761 | Cl2 | LIG | 111 | -14.972 | -23.068 | -13.485 | 1.00 | 0.00 |
| ATOM | 1762 | P1  | LIG | 111 | -18.720 | -25.234 | -11.909 | 1.00 | 0.00 |
| ATOM | 1763 | O1  | LIG | 111 | -19.622 | -24.005 | -11.438 | 1.00 | 0.00 |
| ATOM | 1764 | O2  | LIG | 111 | -19.329 | -25.575 | -13.332 | 1.00 | 0.00 |
| ATOM | 1765 | O3  | LIG | 111 | -17.301 | -24.457 | -12.222 | 1.00 | 0.00 |
| ATOM | 1766 | O4  | LIG | 111 | -18.558 | -26.387 | -11.013 | 1.00 | 0.00 |
| ATOM | 1767 | C1  | LIG | 111 | -19.412 | -23.360 | -10.161 | 1.00 | 0.00 |
| ATOM | 1768 | H1  | LIG | 111 | -20.238 | -22.662 | -10.041 | 1.00 | 0.00 |
| ATOM | 1769 | H2  | LIG | 111 | -18.464 | -22.820 | -10.168 | 1.00 | 0.00 |
| ATOM | 1770 | H3  | LIG | 111 | -19.426 | -24.099 | -9.359  | 1.00 | 0.00 |
| ATOM | 1771 | C2  | LIG | 111 | -19.570 | -24.584 | -14.358 | 1.00 | 0.00 |
| ATOM | 1772 | H4  | LIG | 111 | -18.647 | -24.054 | -14.597 | 1.00 | 0.00 |
| ATOM | 1773 | H5  | LIG | 111 | -20.335 | -23.883 | -14.024 | 1.00 | 0.00 |

|      |      |     |     |     |         |         |         |      |      |
|------|------|-----|-----|-----|---------|---------|---------|------|------|
| ATOM | 1774 | H6  | LIG | 111 | -19.919 | -25.140 | -15.226 | 1.00 | 0.00 |
| ATOM | 1775 | C3  | LIG | 111 | -16.099 | -25.108 | -12.118 | 1.00 | 0.00 |
| ATOM | 1776 | H7  | LIG | 111 | -16.094 | -26.051 | -11.585 | 1.00 | 0.00 |
| ATOM | 1777 | C4  | LIG | 111 | -14.990 | -24.577 | -12.631 | 1.00 | 0.00 |
| TER  |      |     |     |     |         |         |         |      |      |
| ATOM | 1778 | Cl1 | LIG | 112 | -7.156  | 21.658  | 19.353  | 1.00 | 0.00 |
| ATOM | 1779 | Cl2 | LIG | 112 | -5.192  | 19.958  | 20.748  | 1.00 | 0.00 |
| ATOM | 1780 | P1  | LIG | 112 | -7.642  | 16.389  | 19.173  | 1.00 | 0.00 |
| ATOM | 1781 | O1  | LIG | 112 | -6.497  | 15.308  | 18.915  | 1.00 | 0.00 |
| ATOM | 1782 | O2  | LIG | 112 | -8.215  | 15.943  | 20.581  | 1.00 | 0.00 |
| ATOM | 1783 | O3  | LIG | 112 | -6.726  | 17.723  | 19.483  | 1.00 | 0.00 |
| ATOM | 1784 | O4  | LIG | 112 | -8.657  | 16.617  | 18.135  | 1.00 | 0.00 |
| ATOM | 1785 | C1  | LIG | 112 | -5.692  | 15.333  | 17.714  | 1.00 | 0.00 |
| ATOM | 1786 | H1  | LIG | 112 | -5.099  | 14.421  | 17.733  | 1.00 | 0.00 |
| ATOM | 1787 | H2  | LIG | 112 | -5.036  | 16.205  | 17.723  | 1.00 | 0.00 |
| ATOM | 1788 | H3  | LIG | 112 | -6.332  | 15.345  | 16.830  | 1.00 | 0.00 |
| ATOM | 1789 | C2  | LIG | 112 | -7.385  | 15.666  | 21.734  | 1.00 | 0.00 |
| ATOM | 1790 | H4  | LIG | 112 | -6.769  | 16.534  | 21.973  | 1.00 | 0.00 |
| ATOM | 1791 | H5  | LIG | 112 | -6.757  | 14.797  | 21.538  | 1.00 | 0.00 |
| ATOM | 1792 | H6  | LIG | 112 | -8.075  | 15.460  | 22.549  | 1.00 | 0.00 |
| ATOM | 1793 | C3  | LIG | 112 | -7.197  | 18.983  | 19.222  | 1.00 | 0.00 |
| ATOM | 1794 | H7  | LIG | 112 | -8.066  | 19.060  | 18.580  | 1.00 | 0.00 |

ATOM 1795 C4 LIG 112 -6.586 20.056 19.720 1.00 0.00

TER

ATOM 1796 Cl1 LIG 113 18.468 19.675 -6.529 1.00 0.00

ATOM 1797 Cl2 LIG 113 17.233 21.912 -5.060 1.00 0.00

ATOM 1798 P1 LIG 113 15.458 23.178 -9.118 1.00 0.00

ATOM 1799 O1 LIG 113 14.046 23.772 -8.674 1.00 0.00

ATOM 1800 O2 LIG 113 16.337 24.486 -9.286 1.00 0.00

ATOM 1801 O3 LIG 113 15.955 22.504 -7.699 1.00 0.00

ATOM 1802 O4 LIG 113 15.518 22.243 -10.250 1.00 0.00

ATOM 1803 C1 LIG 113 12.915 22.911 -8.407 1.00 0.00

ATOM 1804 H1 LIG 113 12.064 23.573 -8.264 1.00 0.00

ATOM 1805 H2 LIG 113 13.094 22.332 -7.499 1.00 0.00

ATOM 1806 H3 LIG 113 12.736 22.248 -9.254 1.00 0.00

ATOM 1807 C2 LIG 113 16.416 25.532 -8.289 1.00 0.00

ATOM 1808 H4 LIG 113 16.751 25.121 -7.336 1.00 0.00

ATOM 1809 H5 LIG 113 15.442 26.010 -8.176 1.00 0.00

ATOM 1810 H6 LIG 113 17.145 26.243 -8.668 1.00 0.00

ATOM 1811 C3 LIG 113 16.807 21.430 -7.684 1.00 0.00

ATOM 1812 H7 LIG 113 16.934 20.890 -8.614 1.00 0.00

ATOM 1813 C4 LIG 113 17.422 21.064 -6.561 1.00 0.00

TER

END

**Table N:** The number of atoms present in the system of HA-Nap

|      |    |     |     |   |       |        |        |      |      |
|------|----|-----|-----|---|-------|--------|--------|------|------|
| ATOM | 1  | N   | PRO | 1 | 7.123 | -2.899 | 8.478  | 1.00 | 0.00 |
| ATOM | 2  | H2  | PRO | 1 | 7.610 | -2.017 | 8.552  | 1.00 | 0.00 |
| ATOM | 3  | H3  | PRO | 1 | 7.575 | -3.751 | 8.776  | 1.00 | 0.00 |
| ATOM | 4  | CD  | PRO | 1 | 5.857 | -2.854 | 9.272  | 1.00 | 0.00 |
| ATOM | 5  | HD2 | PRO | 1 | 5.791 | -1.838 | 9.663  | 1.00 | 0.00 |
| ATOM | 6  | HD3 | PRO | 1 | 6.002 | -3.551 | 10.096 | 1.00 | 0.00 |
| ATOM | 7  | CG  | PRO | 1 | 4.653 | -3.227 | 8.394  | 1.00 | 0.00 |
| ATOM | 8  | HG2 | PRO | 1 | 3.951 | -2.393 | 8.369  | 1.00 | 0.00 |
| ATOM | 9  | HG3 | PRO | 1 | 4.159 | -4.104 | 8.811  | 1.00 | 0.00 |
| ATOM | 10 | CB  | PRO | 1 | 5.213 | -3.525 | 7.007  | 1.00 | 0.00 |
| ATOM | 11 | HB2 | PRO | 1 | 4.662 | -3.057 | 6.191  | 1.00 | 0.00 |
| ATOM | 12 | HB3 | PRO | 1 | 5.233 | -4.604 | 6.859  | 1.00 | 0.00 |
| ATOM | 13 | CA  | PRO | 1 | 6.652 | -2.973 | 7.051  | 1.00 | 0.00 |
| ATOM | 14 | HA  | PRO | 1 | 7.245 | -3.733 | 6.543  | 1.00 | 0.00 |
| ATOM | 15 | C   | PRO | 1 | 6.792 | -1.632 | 6.306  | 1.00 | 0.00 |
| ATOM | 16 | O   | PRO | 1 | 5.820 | -1.027 | 5.855  | 1.00 | 0.00 |
| ATOM | 17 | N   | TYR | 2 | 8.036 | -1.197 | 6.167  | 1.00 | 0.00 |
| ATOM | 18 | H   | TYR | 2 | 8.798 | -1.747 | 6.536  | 1.00 | 0.00 |
| ATOM | 19 | CA  | TYR | 2 | 8.350 | 0.055  | 5.501  | 1.00 | 0.00 |
| ATOM | 20 | HA  | TYR | 2 | 7.474 | 0.700  | 5.438  | 1.00 | 0.00 |



|      |    |     |     |   |        |        |       |      |      |
|------|----|-----|-----|---|--------|--------|-------|------|------|
| ATOM | 21 | CB  | TYR | 2 | 9.421  | 0.764  | 6.333 | 1.00 | 0.00 |
| ATOM | 22 | HB2 | TYR | 2 | 9.754  | 1.658  | 5.804 | 1.00 | 0.00 |
| ATOM | 23 | HB3 | TYR | 2 | 8.927  | 1.054  | 7.260 | 1.00 | 0.00 |
| ATOM | 24 | CG  | TYR | 2 | 10.624 | -0.114 | 6.652 | 1.00 | 0.00 |
| ATOM | 25 | CD1 | TYR | 2 | 10.611 | -0.940 | 7.796 | 1.00 | 0.00 |
| ATOM | 26 | HD1 | TYR | 2 | 9.745  | -0.937 | 8.457 | 1.00 | 0.00 |
| ATOM | 27 | CE1 | TYR | 2 | 11.714 | -1.767 | 8.084 | 1.00 | 0.00 |
| ATOM | 28 | HE1 | TYR | 2 | 11.730 | -2.357 | 9.000 | 1.00 | 0.00 |
| ATOM | 29 | CZ  | TYR | 2 | 12.837 | -1.755 | 7.234 | 1.00 | 0.00 |
| ATOM | 30 | OH  | TYR | 2 | 13.894 | -2.575 | 7.468 | 1.00 | 0.00 |
| ATOM | 31 | HH  | TYR | 2 | 13.775 | -3.127 | 8.243 | 1.00 | 0.00 |
| ATOM | 32 | CE2 | TYR | 2 | 12.829 | -0.959 | 6.079 | 1.00 | 0.00 |
| ATOM | 33 | HE2 | TYR | 2 | 13.690 | -0.980 | 5.410 | 1.00 | 0.00 |
| ATOM | 34 | CD2 | TYR | 2 | 11.727 | -0.139 | 5.780 | 1.00 | 0.00 |
| ATOM | 35 | HD2 | TYR | 2 | 11.731 | 0.472  | 4.877 | 1.00 | 0.00 |
| ATOM | 36 | C   | TYR | 2 | 8.869  | -0.187 | 4.092 | 1.00 | 0.00 |
| ATOM | 37 | O   | TYR | 2 | 8.660  | 0.662  | 3.243 | 1.00 | 0.00 |
| ATOM | 38 | N   | GLY | 3 | 9.456  | -1.370 | 3.857 | 1.00 | 0.00 |
| ATOM | 39 | H   | GLY | 3 | 9.496  | -2.043 | 4.608 | 1.00 | 0.00 |
| ATOM | 40 | CA  | GLY | 3 | 10.034 | -1.730 | 2.583 | 1.00 | 0.00 |
| ATOM | 41 | HA2 | GLY | 3 | 10.373 | -2.765 | 2.624 | 1.00 | 0.00 |
| ATOM | 42 | HA3 | GLY | 3 | 9.277  | -1.626 | 1.805 | 1.00 | 0.00 |

|      |    |      |     |   |        |        |       |      |      |
|------|----|------|-----|---|--------|--------|-------|------|------|
| ATOM | 43 | C    | GLY | 3 | 11.220 | -0.833 | 2.244 | 1.00 | 0.00 |
| ATOM | 44 | O    | GLY | 3 | 11.169 | 0.392  | 2.248 | 1.00 | 0.00 |
| ATOM | 45 | N    | ARG | 4 | 12.360 | -1.461 | 1.994 | 1.00 | 0.00 |
| ATOM | 46 | H    | ARG | 4 | 12.432 | -2.456 | 2.146 | 1.00 | 0.00 |
| ATOM | 47 | CA   | ARG | 4 | 13.559 | -0.735 | 1.587 | 1.00 | 0.00 |
| ATOM | 48 | HA   | ARG | 4 | 13.388 | 0.341  | 1.641 | 1.00 | 0.00 |
| ATOM | 49 | CB   | ARG | 4 | 14.715 | -1.095 | 2.526 | 1.00 | 0.00 |
| ATOM | 50 | HB2  | ARG | 4 | 14.326 | -1.196 | 3.539 | 1.00 | 0.00 |
| ATOM | 51 | HB3  | ARG | 4 | 15.146 | -2.043 | 2.205 | 1.00 | 0.00 |
| ATOM | 52 | CG   | ARG | 4 | 15.799 | -0.007 | 2.501 | 1.00 | 0.00 |
| ATOM | 53 | HG2  | ARG | 4 | 15.639 | 0.631  | 1.631 | 1.00 | 0.00 |
| ATOM | 54 | HG3  | ARG | 4 | 15.719 | 0.591  | 3.408 | 1.00 | 0.00 |
| ATOM | 55 | CD   | ARG | 4 | 17.193 | -0.633 | 2.424 | 1.00 | 0.00 |
| ATOM | 56 | HD2  | ARG | 4 | 17.350 | -1.277 | 3.288 | 1.00 | 0.00 |
| ATOM | 57 | HD3  | ARG | 4 | 17.276 | -1.223 | 1.511 | 1.00 | 0.00 |
| ATOM | 58 | NE   | ARG | 4 | 18.237 | 0.402  | 2.412 | 1.00 | 0.00 |
| ATOM | 59 | HE   | ARG | 4 | 17.920 | 1.350  | 2.266 | 1.00 | 0.00 |
| ATOM | 60 | CZ   | ARG | 4 | 19.530 | 0.187  | 2.560 | 1.00 | 0.00 |
| ATOM | 61 | NH1  | ARG | 4 | 19.986 | -1.024 | 2.752 | 1.00 | 0.00 |
| ATOM | 62 | HH11 | ARG | 4 | 19.344 | -1.802 | 2.787 | 1.00 | 0.00 |
| ATOM | 63 | HH12 | ARG | 4 | 20.979 | -1.174 | 2.863 | 1.00 | 0.00 |
| ATOM | 64 | NH2  | ARG | 4 | 20.378 | 1.179  | 2.532 | 1.00 | 0.00 |

|      |    |      |     |   |        |        |        |      |      |
|------|----|------|-----|---|--------|--------|--------|------|------|
| ATOM | 65 | HH21 | ARG | 4 | 20.043 | 2.122  | 2.395  | 1.00 | 0.00 |
| ATOM | 66 | HH22 | ARG | 4 | 21.365 | 0.999  | 2.646  | 1.00 | 0.00 |
| ATOM | 67 | C    | ARG | 4 | 13.915 | -1.000 | 0.126  | 1.00 | 0.00 |
| ATOM | 68 | O    | ARG | 4 | 14.999 | -0.631 | -0.305 | 1.00 | 0.00 |
| ATOM | 69 | N    | GLY | 5 | 13.074 | -1.776 | -0.561 | 1.00 | 0.00 |
| ATOM | 70 | H    | GLY | 5 | 12.234 | -2.114 | -0.114 | 1.00 | 0.00 |
| ATOM | 71 | CA   | GLY | 5 | 13.319 | -2.154 | -1.931 | 1.00 | 0.00 |
| ATOM | 72 | HA2  | GLY | 5 | 12.493 | -2.767 | -2.292 | 1.00 | 0.00 |
| ATOM | 73 | HA3  | GLY | 5 | 13.400 | -1.257 | -2.546 | 1.00 | 0.00 |
| ATOM | 74 | C    | GLY | 5 | 14.605 | -2.945 | -2.042 | 1.00 | 0.00 |
| ATOM | 75 | O    | GLY | 5 | 15.349 | -2.761 | -2.990 | 1.00 | 0.00 |
| ATOM | 76 | N    | ARG | 6 | 14.891 | -3.788 | -1.042 | 1.00 | 0.00 |
| ATOM | 77 | H    | ARG | 6 | 14.279 | -3.802 | -0.239 | 1.00 | 0.00 |
| ATOM | 78 | CA   | ARG | 6 | 16.083 | -4.628 | -1.019 | 1.00 | 0.00 |
| ATOM | 79 | HA   | ARG | 6 | 16.944 | -4.052 | -1.358 | 1.00 | 0.00 |
| ATOM | 80 | CB   | ARG | 6 | 16.361 | -5.136 | 0.398  | 1.00 | 0.00 |
| ATOM | 81 | HB2  | ARG | 6 | 17.125 | -5.911 | 0.345  | 1.00 | 0.00 |
| ATOM | 82 | HB3  | ARG | 6 | 16.729 | -4.304 | 0.999  | 1.00 | 0.00 |
| ATOM | 83 | CG   | ARG | 6 | 15.087 | -5.714 | 1.045  | 1.00 | 0.00 |
| ATOM | 84 | HG2  | ARG | 6 | 14.637 | -4.947 | 1.676  | 1.00 | 0.00 |
| ATOM | 85 | HG3  | ARG | 6 | 14.388 | -5.989 | 0.255  | 1.00 | 0.00 |
| ATOM | 86 | CD   | ARG | 6 | 15.411 | -6.945 | 1.891  | 1.00 | 0.00 |

|      |     |          |   |        |         |        |      |      |
|------|-----|----------|---|--------|---------|--------|------|------|
| ATOM | 87  | HD2 ARG  | 6 | 16.489 | -7.009  | 2.040  | 1.00 | 0.00 |
| ATOM | 88  | HD3 ARG  | 6 | 14.915 | -6.861  | 2.858  | 1.00 | 0.00 |
| ATOM | 89  | NE ARG   | 6 | 14.952 | -8.178  | 1.231  | 1.00 | 0.00 |
| ATOM | 90  | HE ARG   | 6 | 14.700 | -8.093  | 0.256  | 1.00 | 0.00 |
| ATOM | 91  | CZ ARG   | 6 | 14.870 | -9.365  | 1.802  | 1.00 | 0.00 |
| ATOM | 92  | NH1 ARG  | 6 | 15.185 | -9.520  | 3.064  | 1.00 | 0.00 |
| ATOM | 93  | HH11 ARG | 6 | 15.493 | -8.725  | 3.605  | 1.00 | 0.00 |
| ATOM | 94  | HH12 ARG | 6 | 15.118 | -10.433 | 3.489  | 1.00 | 0.00 |
| ATOM | 95  | NH2 ARG  | 6 | 14.451 | -10.397 | 1.124  | 1.00 | 0.00 |
| ATOM | 96  | HH21 ARG | 6 | 14.187 | -10.287 | 0.155  | 1.00 | 0.00 |
| ATOM | 97  | HH22 ARG | 6 | 14.392 | -11.300 | 1.570  | 1.00 | 0.00 |
| ATOM | 98  | C ARG    | 6 | 15.982 | -5.795  | -1.988 | 1.00 | 0.00 |
| ATOM | 99  | O ARG    | 6 | 16.126 | -6.937  | -1.554 | 1.00 | 0.00 |
| ATOM | 100 | N THR    | 7 | 15.644 | -5.527  | -3.233 | 1.00 | 0.00 |
| ATOM | 101 | H THR    | 7 | 15.511 | -4.558  | -3.487 | 1.00 | 0.00 |
| ATOM | 102 | CA THR   | 7 | 15.389 | -6.541  | -4.235 | 1.00 | 0.00 |
| ATOM | 103 | HA THR   | 7 | 16.053 | -7.384  | -4.043 | 1.00 | 0.00 |
| ATOM | 104 | CB THR   | 7 | 13.930 | -7.023  | -4.108 | 1.00 | 0.00 |
| ATOM | 105 | HB THR   | 7 | 13.663 | -7.564  | -5.016 | 1.00 | 0.00 |
| ATOM | 106 | CG2 THR  | 7 | 13.749 | -7.943  | -2.892 | 1.00 | 0.00 |
| ATOM | 107 | HG21 THR | 7 | 14.015 | -7.402  | -1.984 | 1.00 | 0.00 |
| ATOM | 108 | HG22 THR | 7 | 12.710 | -8.265  | -2.832 | 1.00 | 0.00 |

|      |     |      |     |   |        |        |         |      |      |
|------|-----|------|-----|---|--------|--------|---------|------|------|
| ATOM | 109 | HG23 | THR | 7 | 14.394 | -8.815 | -2.997  | 1.00 | 0.00 |
| ATOM | 110 | OG1  | THR | 7 | 13.057 | -5.924 | -3.893  | 1.00 | 0.00 |
| ATOM | 111 | HG1  | THR | 7 | 12.155 | -6.242 | -3.817  | 1.00 | 0.00 |
| ATOM | 112 | C    | THR | 7 | 15.688 | -5.985 | -5.612  | 1.00 | 0.00 |
| ATOM | 113 | O    | THR | 7 | 16.154 | -4.857 | -5.731  | 1.00 | 0.00 |
| ATOM | 114 | N    | GLU | 8 | 15.445 | -6.789 | -6.637  | 1.00 | 0.00 |
| ATOM | 115 | H    | GLU | 8 | 15.149 | -7.738 | -6.464  | 1.00 | 0.00 |
| ATOM | 116 | CA   | GLU | 8 | 15.667 | -6.376 | -8.016  | 1.00 | 0.00 |
| ATOM | 117 | HA   | GLU | 8 | 16.253 | -5.457 | -8.046  | 1.00 | 0.00 |
| ATOM | 118 | CB   | GLU | 8 | 16.438 | -7.473 | -8.761  | 1.00 | 0.00 |
| ATOM | 119 | HB2  | GLU | 8 | 15.983 | -8.438 | -8.539  | 1.00 | 0.00 |
| ATOM | 120 | HB3  | GLU | 8 | 16.378 | -7.282 | -9.833  | 1.00 | 0.00 |
| ATOM | 121 | CG   | GLU | 8 | 17.907 | -7.489 | -8.327  | 1.00 | 0.00 |
| ATOM | 122 | HG2  | GLU | 8 | 18.035 | -6.941 | -7.394  | 1.00 | 0.00 |
| ATOM | 123 | HG3  | GLU | 8 | 18.182 | -8.533 | -8.176  | 1.00 | 0.00 |
| ATOM | 124 | CD   | GLU | 8 | 18.804 | -6.877 | -9.404  | 1.00 | 0.00 |
| ATOM | 125 | OE1  | GLU | 8 | 19.110 | -7.608 | -10.373 | 1.00 | 0.00 |
| ATOM | 126 | OE2  | GLU | 8 | 19.136 | -5.679 | -9.268  | 1.00 | 0.00 |
| ATOM | 127 | C    | GLU | 8 | 14.345 | -6.047 | -8.708  | 1.00 | 0.00 |
| ATOM | 128 | O    | GLU | 8 | 13.266 | -6.045 | -8.096  | 1.00 | 0.00 |
| ATOM | 129 | N    | SER | 9 | 14.435 | -5.729 | -9.995  | 1.00 | 0.00 |
| ATOM | 130 | H    | SER | 9 | 15.350 | -5.614 | -10.407 | 1.00 | 0.00 |

|      |     |     |     |    |        |        |         |      |      |
|------|-----|-----|-----|----|--------|--------|---------|------|------|
| ATOM | 131 | CA  | SER | 9  | 13.272 | -5.460 | -10.819 | 1.00 | 0.00 |
| ATOM | 132 | HA  | SER | 9  | 12.650 | -4.709 | -10.332 | 1.00 | 0.00 |
| ATOM | 133 | CB  | SER | 9  | 13.676 | -4.937 | -12.206 | 1.00 | 0.00 |
| ATOM | 134 | HB2 | SER | 9  | 13.065 | -5.448 | -12.950 | 1.00 | 0.00 |
| ATOM | 135 | HB3 | SER | 9  | 13.467 | -3.867 | -12.237 | 1.00 | 0.00 |
| ATOM | 136 | OG  | SER | 9  | 15.043 | -5.157 | -12.489 | 1.00 | 0.00 |
| ATOM | 137 | HG  | SER | 9  | 15.248 | -4.815 | -13.363 | 1.00 | 0.00 |
| ATOM | 138 | C   | SER | 9  | 12.378 | -6.698 | -10.958 | 1.00 | 0.00 |
| ATOM | 139 | O   | SER | 9  | 12.730 | -7.817 | -10.589 | 1.00 | 0.00 |
| ATOM | 140 | N   | GLY | 10 | 11.184 | -6.505 | -11.515 | 1.00 | 0.00 |
| ATOM | 141 | H   | GLY | 10 | 10.896 | -5.575 | -11.787 | 1.00 | 0.00 |
| ATOM | 142 | CA  | GLY | 10 | 10.262 | -7.611 | -11.750 | 1.00 | 0.00 |
| ATOM | 143 | HA2 | GLY | 10 | 10.395 | -7.975 | -12.769 | 1.00 | 0.00 |
| ATOM | 144 | HA3 | GLY | 10 | 10.482 | -8.413 | -11.046 | 1.00 | 0.00 |
| ATOM | 145 | C   | GLY | 10 | 8.834  | -7.178 | -11.568 | 1.00 | 0.00 |
| ATOM | 146 | O   | GLY | 10 | 8.244  | -6.612 | -12.478 | 1.00 | 0.00 |
| ATOM | 147 | N   | CYX | 11 | 8.329  | -7.281 | -10.338 | 1.00 | 0.00 |
| ATOM | 148 | H   | CYX | 11 | 8.856  | -7.747 | -9.613  | 1.00 | 0.00 |
| ATOM | 149 | CA  | CYX | 11 | 7.004  | -6.808 | -10.024 | 1.00 | 0.00 |
| ATOM | 150 | HA  | CYX | 11 | 6.286  | -7.217 | -10.735 | 1.00 | 0.00 |
| ATOM | 151 | CB  | CYX | 11 | 6.606  | -7.245 | -8.624  | 1.00 | 0.00 |
| ATOM | 152 | HB2 | CYX | 11 | 7.224  | -6.725 | -7.892  | 1.00 | 0.00 |

|      |     |     |     |    |        |        |         |      |      |
|------|-----|-----|-----|----|--------|--------|---------|------|------|
| ATOM | 153 | HB3 | CYX | 11 | 5.557  | -7.003 | -8.452  | 1.00 | 0.00 |
| ATOM | 154 | SG  | CYX | 11 | 6.722  | -9.003 | -8.271  | 1.00 | 0.00 |
| ATOM | 155 | C   | CYX | 11 | 6.904  | -5.284 | -10.169 | 1.00 | 0.00 |
| ATOM | 156 | O   | CYX | 11 | 5.817  | -4.723 | -10.139 | 1.00 | 0.00 |
| ATOM | 157 | N   | TYR | 12 | 8.047  | -4.617 | -10.260 | 1.00 | 0.00 |
| ATOM | 158 | H   | TYR | 12 | 8.899  | -5.154 | -10.184 | 1.00 | 0.00 |
| ATOM | 159 | CA  | TYR | 12 | 8.152  | -3.199 | -10.479 | 1.00 | 0.00 |
| ATOM | 160 | HA  | TYR | 12 | 7.406  | -2.644 | -9.910  | 1.00 | 0.00 |
| ATOM | 161 | CB  | TYR | 12 | 9.535  | -2.794 | -9.992  | 1.00 | 0.00 |
| ATOM | 162 | HB2 | TYR | 12 | 9.612  | -3.124 | -8.956  | 1.00 | 0.00 |
| ATOM | 163 | HB3 | TYR | 12 | 10.272 | -3.322 | -10.597 | 1.00 | 0.00 |
| ATOM | 164 | CG  | TYR | 12 | 9.794  | -1.312 | -10.067 | 1.00 | 0.00 |
| ATOM | 165 | CD1 | TYR | 12 | 8.972  | -0.420 | -9.359  | 1.00 | 0.00 |
| ATOM | 166 | HD1 | TYR | 12 | 8.146  | -0.806 | -8.763  | 1.00 | 0.00 |
| ATOM | 167 | CE1 | TYR | 12 | 9.210  | 0.964  | -9.417  | 1.00 | 0.00 |
| ATOM | 168 | HE1 | TYR | 12 | 8.545  | 1.655  | -8.900  | 1.00 | 0.00 |
| ATOM | 169 | CZ  | TYR | 12 | 10.260 | 1.460  | -10.209 | 1.00 | 0.00 |
| ATOM | 170 | OH  | TYR | 12 | 10.525 | 2.794  | -10.225 | 1.00 | 0.00 |
| ATOM | 171 | HH  | TYR | 12 | 9.936  | 3.301  | -9.662  | 1.00 | 0.00 |
| ATOM | 172 | CE2 | TYR | 12 | 11.086 | 0.565  | -10.922 | 1.00 | 0.00 |
| ATOM | 173 | HE2 | TYR | 12 | 11.911 | 0.948  | -11.524 | 1.00 | 0.00 |
| ATOM | 174 | CD2 | TYR | 12 | 10.846 | -0.820 | -10.857 | 1.00 | 0.00 |

|      |     |          |    |        |        |         |      |      |
|------|-----|----------|----|--------|--------|---------|------|------|
| ATOM | 175 | HD2 TYR  | 12 | 11.476 | -1.509 | -11.420 | 1.00 | 0.00 |
| ATOM | 176 | C TYR    | 12 | 8.019  | -2.833 | -11.952 | 1.00 | 0.00 |
| ATOM | 177 | O TYR    | 12 | 7.356  | -1.871 | -12.290 | 1.00 | 0.00 |
| ATOM | 178 | N GLN    | 13 | 8.634  | -3.623 | -12.825 | 1.00 | 0.00 |
| ATOM | 179 | H GLN    | 13 | 9.178  | -4.413 | -12.510 | 1.00 | 0.00 |
| ATOM | 180 | CA GLN   | 13 | 8.563  | -3.362 | -14.247 | 1.00 | 0.00 |
| ATOM | 181 | HA GLN   | 13 | 8.933  | -2.360 | -14.468 | 1.00 | 0.00 |
| ATOM | 182 | CB GLN   | 13 | 9.428  | -4.377 | -14.993 | 1.00 | 0.00 |
| ATOM | 183 | HB2 GLN  | 13 | 10.478 | -4.166 | -14.790 | 1.00 | 0.00 |
| ATOM | 184 | HB3 GLN  | 13 | 9.184  | -5.379 | -14.641 | 1.00 | 0.00 |
| ATOM | 185 | CG GLN   | 13 | 9.173  | -4.290 | -16.503 | 1.00 | 0.00 |
| ATOM | 186 | HG2 GLN  | 13 | 8.137  | -4.542 | -16.729 | 1.00 | 0.00 |
| ATOM | 187 | HG3 GLN  | 13 | 9.369  | -3.260 | -16.802 | 1.00 | 0.00 |
| ATOM | 188 | CD GLN   | 13 | 10.079 | -5.206 | -17.301 | 1.00 | 0.00 |
| ATOM | 189 | OE1 GLN  | 13 | 11.050 | -5.766 | -16.813 | 1.00 | 0.00 |
| ATOM | 190 | NE2 GLN  | 13 | 9.757  | -5.419 | -18.556 | 1.00 | 0.00 |
| ATOM | 191 | HE21 GLN | 13 | 10.332 | -6.022 | -19.127 | 1.00 | 0.00 |
| ATOM | 192 | HE22 GLN | 13 | 8.936  | -4.978 | -18.946 | 1.00 | 0.00 |
| ATOM | 193 | C GLN    | 13 | 7.116  | -3.456 | -14.714 | 1.00 | 0.00 |
| ATOM | 194 | O GLN    | 13 | 6.647  | -2.666 | -15.496 | 1.00 | 0.00 |
| ATOM | 195 | N GLN    | 14 | 6.389  | -4.466 | -14.254 | 1.00 | 0.00 |
| ATOM | 196 | H GLN    | 14 | 6.814  | -5.181 | -13.682 | 1.00 | 0.00 |



|      |     |      |     |    |       |        |         |      |      |
|------|-----|------|-----|----|-------|--------|---------|------|------|
| ATOM | 197 | CA   | GLN | 14 | 4.988 | -4.611 | -14.612 | 1.00 | 0.00 |
| ATOM | 198 | HA   | GLN | 14 | 4.871 | -4.523 | -15.693 | 1.00 | 0.00 |
| ATOM | 199 | CB   | GLN | 14 | 4.464 | -5.980 | -14.173 | 1.00 | 0.00 |
| ATOM | 200 | HB2  | GLN | 14 | 3.375 | -5.942 | -14.152 | 1.00 | 0.00 |
| ATOM | 201 | HB3  | GLN | 14 | 4.787 | -6.723 | -14.902 | 1.00 | 0.00 |
| ATOM | 202 | CG   | GLN | 14 | 4.986 | -6.362 | -12.793 | 1.00 | 0.00 |
| ATOM | 203 | HG2  | GLN | 14 | 5.909 | -6.921 | -12.946 | 1.00 | 0.00 |
| ATOM | 204 | HG3  | GLN | 14 | 5.203 | -5.448 | -12.240 | 1.00 | 0.00 |
| ATOM | 205 | CD   | GLN | 14 | 4.048 | -7.199 | -11.984 | 1.00 | 0.00 |
| ATOM | 206 | OE1  | GLN | 14 | 3.291 | -7.956 | -12.537 | 1.00 | 0.00 |
| ATOM | 207 | NE2  | GLN | 14 | 4.082 | -7.050 | -10.667 | 1.00 | 0.00 |
| ATOM | 208 | HE21 | GLN | 14 | 3.465 | -7.596 | -10.084 | 1.00 | 0.00 |
| ATOM | 209 | HE22 | GLN | 14 | 4.725 | -6.390 | -10.253 | 1.00 | 0.00 |
| ATOM | 210 | C    | GLN | 14 | 4.133 | -3.501 | -14.011 | 1.00 | 0.00 |
| ATOM | 211 | O    | GLN | 14 | 3.114 | -3.144 | -14.571 | 1.00 | 0.00 |
| ATOM | 212 | N    | MET | 15 | 4.527 | -2.993 | -12.849 | 1.00 | 0.00 |
| ATOM | 213 | H    | MET | 15 | 5.368 | -3.370 | -12.437 | 1.00 | 0.00 |
| ATOM | 214 | CA   | MET | 15 | 3.849 | -1.928 | -12.162 | 1.00 | 0.00 |
| ATOM | 215 | HA   | MET | 15 | 2.876 | -2.278 | -11.820 | 1.00 | 0.00 |
| ATOM | 216 | CB   | MET | 15 | 4.645 | -1.458 | -10.961 | 1.00 | 0.00 |
| ATOM | 217 | HB2  | MET | 15 | 5.574 | -2.026 | -10.916 | 1.00 | 0.00 |
| ATOM | 218 | HB3  | MET | 15 | 4.874 | -0.399 | -11.089 | 1.00 | 0.00 |

|      |     |     |     |    |       |        |         |      |      |
|------|-----|-----|-----|----|-------|--------|---------|------|------|
| ATOM | 219 | CG  | MET | 15 | 3.876 | -1.654 | -9.687  | 1.00 | 0.00 |
| ATOM | 220 | HG2 | MET | 15 | 2.867 | -1.259 | -9.804  | 1.00 | 0.00 |
| ATOM | 221 | HG3 | MET | 15 | 3.825 | -2.716 | -9.450  | 1.00 | 0.00 |
| ATOM | 222 | SD  | MET | 15 | 4.696 | -0.789 | -8.347  | 1.00 | 0.00 |
| ATOM | 223 | CE  | MET | 15 | 5.535 | -2.167 | -7.614  | 1.00 | 0.00 |
| ATOM | 224 | HE1 | MET | 15 | 6.209 | -2.613 | -8.345  | 1.00 | 0.00 |
| ATOM | 225 | HE2 | MET | 15 | 6.109 | -1.827 | -6.752  | 1.00 | 0.00 |
| ATOM | 226 | HE3 | MET | 15 | 4.804 | -2.909 | -7.294  | 1.00 | 0.00 |
| ATOM | 227 | C   | MET | 15 | 3.675 | -0.739 | -13.062 | 1.00 | 0.00 |
| ATOM | 228 | O   | MET | 15 | 2.573 | -0.242 | -13.114 | 1.00 | 0.00 |
| ATOM | 229 | N   | GLU | 16 | 4.727 | -0.265 | -13.721 | 1.00 | 0.00 |
| ATOM | 230 | H   | GLU | 16 | 5.638 | -0.667 | -13.551 | 1.00 | 0.00 |
| ATOM | 231 | CA  | GLU | 16 | 4.629 | 0.861  | -14.646 | 1.00 | 0.00 |
| ATOM | 232 | HA  | GLU | 16 | 4.374 | 1.773  | -14.107 | 1.00 | 0.00 |
| ATOM | 233 | CB  | GLU | 16 | 5.981 | 1.067  | -15.346 | 1.00 | 0.00 |
| ATOM | 234 | HB2 | GLU | 16 | 6.082 | 2.125  | -15.592 | 1.00 | 0.00 |
| ATOM | 235 | HB3 | GLU | 16 | 6.773 | 0.778  | -14.655 | 1.00 | 0.00 |
| ATOM | 236 | CG  | GLU | 16 | 6.092 | 0.231  | -16.630 | 1.00 | 0.00 |
| ATOM | 237 | HG2 | GLU | 16 | 5.718 | -0.753 | -16.350 | 1.00 | 0.00 |
| ATOM | 238 | HG3 | GLU | 16 | 5.473 | 0.640  | -17.429 | 1.00 | 0.00 |
| ATOM | 239 | CD  | GLU | 16 | 7.534 | 0.108  | -17.116 | 1.00 | 0.00 |
| ATOM | 240 | OE1 | GLU | 16 | 8.377 | -0.459 | -16.379 | 1.00 | 0.00 |

|      |     |     |     |    |        |        |         |      |      |
|------|-----|-----|-----|----|--------|--------|---------|------|------|
| ATOM | 241 | OE2 | GLU | 16 | 7.834  | 0.654  | -18.198 | 1.00 | 0.00 |
| ATOM | 242 | C   | GLU | 16 | 3.513  | 0.643  | -15.677 | 1.00 | 0.00 |
| ATOM | 243 | O   | GLU | 16 | 2.830  | 1.588  | -16.062 | 1.00 | 0.00 |
| ATOM | 244 | N   | GLU | 17 | 3.299  | -0.622 | -16.055 | 1.00 | 0.00 |
| ATOM | 245 | H   | GLU | 17 | 3.879  | -1.355 | -15.674 | 1.00 | 0.00 |
| ATOM | 246 | CA  | GLU | 17 | 2.286  | -0.981 | -17.015 | 1.00 | 0.00 |
| ATOM | 247 | HA  | GLU | 17 | 2.283  | -0.263 | -17.836 | 1.00 | 0.00 |
| ATOM | 248 | CB  | GLU | 17 | 2.563  | -2.378 | -17.586 | 1.00 | 0.00 |
| ATOM | 249 | HB2 | GLU | 17 | 3.598  | -2.654 | -17.384 | 1.00 | 0.00 |
| ATOM | 250 | HB3 | GLU | 17 | 1.896  | -3.101 | -17.118 | 1.00 | 0.00 |
| ATOM | 251 | CG  | GLU | 17 | 2.324  | -2.369 | -19.099 | 1.00 | 0.00 |
| ATOM | 252 | HG2 | GLU | 17 | 1.734  | -3.245 | -19.367 | 1.00 | 0.00 |
| ATOM | 253 | HG3 | GLU | 17 | 1.771  | -1.466 | -19.359 | 1.00 | 0.00 |
| ATOM | 254 | CD  | GLU | 17 | 3.649  | -2.393 | -19.865 | 1.00 | 0.00 |
| ATOM | 255 | OE1 | GLU | 17 | 4.537  | -1.589 | -19.530 | 1.00 | 0.00 |
| ATOM | 256 | OE2 | GLU | 17 | 3.760  | -3.229 | -20.789 | 1.00 | 0.00 |
| ATOM | 257 | C   | GLU | 17 | 0.912  | -0.951 | -16.354 | 1.00 | 0.00 |
| ATOM | 258 | O   | GLU | 17 | -0.101 | -0.712 | -17.011 | 1.00 | 0.00 |
| ATOM | 259 | N   | ALA | 18 | 0.852  | -1.212 | -15.050 | 1.00 | 0.00 |
| ATOM | 260 | H   | ALA | 18 | 1.694  | -1.526 | -14.589 | 1.00 | 0.00 |
| ATOM | 261 | CA  | ALA | 18 | -0.360 | -1.150 | -14.285 | 1.00 | 0.00 |
| ATOM | 262 | HA  | ALA | 18 | -1.204 | -0.797 | -14.878 | 1.00 | 0.00 |

|      |     |     |     |    |        |        |         |      |      |
|------|-----|-----|-----|----|--------|--------|---------|------|------|
| ATOM | 263 | CB  | ALA | 18 | -0.662 | -2.562 | -13.798 | 1.00 | 0.00 |
| ATOM | 264 | HB1 | ALA | 18 | 0.171  | -2.924 | -13.196 | 1.00 | 0.00 |
| ATOM | 265 | HB2 | ALA | 18 | -1.570 | -2.552 | -13.195 | 1.00 | 0.00 |
| ATOM | 266 | HB3 | ALA | 18 | -0.803 | -3.220 | -14.656 | 1.00 | 0.00 |
| ATOM | 267 | C   | ALA | 18 | -0.191 | -0.139 | -13.176 | 1.00 | 0.00 |
| ATOM | 268 | O   | ALA | 18 | -0.097 | -0.539 | -12.029 | 1.00 | 0.00 |
| ATOM | 269 | N   | GLU | 19 | -0.072 | 1.150  | -13.469 | 1.00 | 0.00 |
| ATOM | 270 | H   | GLU | 19 | -0.017 | 1.406  | -14.445 | 1.00 | 0.00 |
| ATOM | 271 | CA  | GLU | 19 | 0.099  | 2.195  | -12.472 | 1.00 | 0.00 |
| ATOM | 272 | HA  | GLU | 19 | 0.894  | 1.923  | -11.779 | 1.00 | 0.00 |
| ATOM | 273 | CB  | GLU | 19 | 0.475  | 3.514  | -13.153 | 1.00 | 0.00 |
| ATOM | 274 | HB2 | GLU | 19 | 1.522  | 3.465  | -13.454 | 1.00 | 0.00 |
| ATOM | 275 | HB3 | GLU | 19 | -0.150 | 3.640  | -14.037 | 1.00 | 0.00 |
| ATOM | 276 | CG  | GLU | 19 | 0.272  | 4.696  | -12.216 | 1.00 | 0.00 |
| ATOM | 277 | HG2 | GLU | 19 | 0.082  | 4.422  | -11.179 | 1.00 | 0.00 |
| ATOM | 278 | HG3 | GLU | 19 | 1.208  | 5.252  | -12.280 | 1.00 | 0.00 |
| ATOM | 279 | CD  | GLU | 19 | -0.900 | 5.587  | -12.742 | 1.00 | 0.00 |
| ATOM | 280 | OE1 | GLU | 19 | -1.882 | 5.198  | -13.419 | 1.00 | 0.00 |
| ATOM | 281 | OE2 | GLU | 19 | -0.923 | 6.765  | -12.368 | 1.00 | 0.00 |
| ATOM | 282 | C   | GLU | 19 | -1.200 | 2.256  | -11.619 | 1.00 | 0.00 |
| ATOM | 283 | O   | GLU | 19 | -2.042 | 3.147  | -11.602 | 1.00 | 0.00 |
| ATOM | 284 | N   | MET | 20 | -1.424 | 1.300  | -10.763 | 1.00 | 0.00 |

|      |     |     |     |    |        |        |         |      |      |
|------|-----|-----|-----|----|--------|--------|---------|------|------|
| ATOM | 285 | H   | MET | 20 | -0.755 | 0.549  | -10.670 | 1.00 | 0.00 |
| ATOM | 286 | CA  | MET | 20 | -2.616 | 1.259  | -9.953  | 1.00 | 0.00 |
| ATOM | 287 | HA  | MET | 20 | -3.396 | 1.890  | -10.381 | 1.00 | 0.00 |
| ATOM | 288 | CB  | MET | 20 | -3.117 | -0.165 | -9.908  | 1.00 | 0.00 |
| ATOM | 289 | HB2 | MET | 20 | -4.187 | -0.127 | -9.704  | 1.00 | 0.00 |
| ATOM | 290 | HB3 | MET | 20 | -2.950 | -0.600 | -10.894 | 1.00 | 0.00 |
| ATOM | 291 | CG  | MET | 20 | -2.437 | -1.010 | -8.865  | 1.00 | 0.00 |
| ATOM | 292 | HG2 | MET | 20 | -1.451 | -0.574 | -8.701  | 1.00 | 0.00 |
| ATOM | 293 | HG3 | MET | 20 | -3.029 | -0.922 | -7.954  | 1.00 | 0.00 |
| ATOM | 294 | SD  | MET | 20 | -2.256 | -2.717 | -9.277  | 1.00 | 0.00 |
| ATOM | 295 | CE  | MET | 20 | -0.987 | -2.635 | -10.498 | 1.00 | 0.00 |
| ATOM | 296 | HE1 | MET | 20 | -0.090 | -2.195 | -10.062 | 1.00 | 0.00 |
| ATOM | 297 | HE2 | MET | 20 | -0.761 | -3.639 | -10.857 | 1.00 | 0.00 |
| ATOM | 298 | HE3 | MET | 20 | -1.324 | -2.019 | -11.333 | 1.00 | 0.00 |
| ATOM | 299 | C   | MET | 20 | -2.269 | 1.767  | -8.582  | 1.00 | 0.00 |
| ATOM | 300 | O   | MET | 20 | -3.163 | 2.102  | -7.806  | 1.00 | 0.00 |
| ATOM | 301 | N   | LEU | 21 | -0.969 | 1.787  | -8.265  | 1.00 | 0.00 |
| ATOM | 302 | H   | LEU | 21 | -0.297 | 1.406  | -8.916  | 1.00 | 0.00 |
| ATOM | 303 | CA  | LEU | 21 | -0.497 | 2.228  | -6.976  | 1.00 | 0.00 |
| ATOM | 304 | HA  | LEU | 21 | -1.248 | 2.031  | -6.212  | 1.00 | 0.00 |
| ATOM | 305 | CB  | LEU | 21 | 0.773  | 1.476  | -6.615  | 1.00 | 0.00 |
| ATOM | 306 | HB2 | LEU | 21 | 1.440  | 1.832  | -7.401  | 1.00 | 0.00 |

|      |     |          |    |        |        |         |      |      |
|------|-----|----------|----|--------|--------|---------|------|------|
| ATOM | 307 | HB3 LEU  | 21 | 1.158  | 1.787  | -5.644  | 1.00 | 0.00 |
| ATOM | 308 | CG LEU   | 21 | 0.693  | -0.063 | -6.667  | 1.00 | 0.00 |
| ATOM | 309 | HG LEU   | 21 | 1.461  | -0.451 | -5.998  | 1.00 | 0.00 |
| ATOM | 310 | CD1 LEU  | 21 | -0.659 | -0.617 | -6.261  | 1.00 | 0.00 |
| ATOM | 311 | HD11 LEU | 21 | -1.427 | -0.229 | -6.931  | 1.00 | 0.00 |
| ATOM | 312 | HD12 LEU | 21 | -0.639 | -1.705 | -6.323  | 1.00 | 0.00 |
| ATOM | 313 | HD13 LEU | 21 | -0.884 | -0.315 | -5.239  | 1.00 | 0.00 |
| ATOM | 314 | CD2 LEU  | 21 | 1.143  | -0.552 | -8.031  | 1.00 | 0.00 |
| ATOM | 315 | HD21 LEU | 21 | 2.171  | -0.237 | -8.210  | 1.00 | 0.00 |
| ATOM | 316 | HD22 LEU | 21 | 1.086  | -1.640 | -8.065  | 1.00 | 0.00 |
| ATOM | 317 | HD23 LEU | 21 | 0.496  | -0.130 | -8.801  | 1.00 | 0.00 |
| ATOM | 318 | C LEU    | 21 | -0.333 | 3.736  | -6.980  | 1.00 | 0.00 |
| ATOM | 319 | O LEU    | 21 | 0.239  | 4.304  | -6.063  | 1.00 | 0.00 |
| ATOM | 320 | N ASN    | 22 | -0.907 | 4.379  | -7.995  | 1.00 | 0.00 |
| ATOM | 321 | H ASN    | 22 | -1.404 | 3.853  | -8.700  | 1.00 | 0.00 |
| ATOM | 322 | CA ASN   | 22 | -0.878 | 5.811  | -8.108  | 1.00 | 0.00 |
| ATOM | 323 | HA ASN   | 22 | -0.087 | 6.219  | -7.479  | 1.00 | 0.00 |
| ATOM | 324 | CB ASN   | 22 | -0.612 | 6.215  | -9.541  | 1.00 | 0.00 |
| ATOM | 325 | HB2 ASN  | 22 | 0.334  | 5.954  | -10.015 | 1.00 | 0.00 |
| ATOM | 326 | HB3 ASN  | 22 | -1.416 | 5.636  | -9.994  | 1.00 | 0.00 |
| ATOM | 327 | CG ASN   | 22 | -0.885 | 7.698  | -9.781  | 1.00 | 0.00 |
| ATOM | 328 | OD1 ASN  | 22 | -1.972 | 8.133  | -10.145 | 1.00 | 0.00 |

|      |     |      |     |    |        |       |         |      |      |
|------|-----|------|-----|----|--------|-------|---------|------|------|
| ATOM | 329 | ND2  | ASN | 22 | 0.023  | 8.511 | -9.291  | 1.00 | 0.00 |
| ATOM | 330 | HD21 | ASN | 22 | -0.082 | 9.509 | -9.407  | 1.00 | 0.00 |
| ATOM | 331 | HD22 | ASN | 22 | 0.822  | 8.135 | -8.802  | 1.00 | 0.00 |
| ATOM | 332 | C    | ASN | 22 | -2.223 | 6.373 | -7.714  | 1.00 | 0.00 |
| ATOM | 333 | O    | ASN | 22 | -2.277 | 7.390 | -7.051  | 1.00 | 0.00 |
| ATOM | 334 | N    | HIE | 23 | -3.321 | 5.696 | -8.062  | 1.00 | 0.00 |
| ATOM | 335 | H    | HIE | 23 | -3.221 | 4.842 | -8.591  | 1.00 | 0.00 |
| ATOM | 336 | CA   | HIE | 23 | -4.657 | 6.158 | -7.749  | 1.00 | 0.00 |
| ATOM | 337 | HA   | HIE | 23 | -4.763 | 7.212 | -8.008  | 1.00 | 0.00 |
| ATOM | 338 | CB   | HIE | 23 | -5.673 | 5.355 | -8.552  | 1.00 | 0.00 |
| ATOM | 339 | HB2  | HIE | 23 | -5.500 | 4.286 | -8.434  | 1.00 | 0.00 |
| ATOM | 340 | HB3  | HIE | 23 | -6.680 | 5.600 | -8.214  | 1.00 | 0.00 |
| ATOM | 341 | CG   | HIE | 23 | -5.636 | 5.636 | -10.027 | 1.00 | 0.00 |
| ATOM | 342 | ND1  | HIE | 23 | -6.595 | 6.351 | -10.718 | 1.00 | 0.00 |
| ATOM | 343 | CE1  | HIE | 23 | -6.226 | 6.385 | -12.019 | 1.00 | 0.00 |
| ATOM | 344 | HE1  | HIE | 23 | -6.847 | 6.908 | -12.746 | 1.00 | 0.00 |
| ATOM | 345 | NE2  | HIE | 23 | -5.062 | 5.706 | -12.169 | 1.00 | 0.00 |
| ATOM | 346 | HE2  | HIE | 23 | -4.549 | 5.562 | -13.028 | 1.00 | 0.00 |
| ATOM | 347 | CD2  | HIE | 23 | -4.680 | 5.232 | -10.927 | 1.00 | 0.00 |
| ATOM | 348 | HD2  | HIE | 23 | -3.761 | 4.655 | -10.823 | 1.00 | 0.00 |
| ATOM | 349 | C    | HIE | 23 | -4.899 | 6.015 | -6.260  | 1.00 | 0.00 |
| ATOM | 350 | O    | HIE | 23 | -5.156 | 7.022 | -5.605  | 1.00 | 0.00 |

|      |     |     |     |    |        |        |        |      |      |
|------|-----|-----|-----|----|--------|--------|--------|------|------|
| ATOM | 351 | N   | CYX | 24 | -4.831 | 4.777  | -5.746 | 1.00 | 0.00 |
| ATOM | 352 | H   | CYX | 24 | -4.701 | 3.980  | -6.353 | 1.00 | 0.00 |
| ATOM | 353 | CA  | CYX | 24 | -4.974 | 4.540  | -4.315 | 1.00 | 0.00 |
| ATOM | 354 | HA  | CYX | 24 | -5.973 | 4.838  | -3.997 | 1.00 | 0.00 |
| ATOM | 355 | CB  | CYX | 24 | -4.772 | 3.066  | -3.974 | 1.00 | 0.00 |
| ATOM | 356 | HB2 | CYX | 24 | -4.362 | 2.546  | -4.840 | 1.00 | 0.00 |
| ATOM | 357 | HB3 | CYX | 24 | -4.080 | 2.978  | -3.137 | 1.00 | 0.00 |
| ATOM | 358 | SG  | CYX | 24 | -6.271 | 2.197  | -3.512 | 1.00 | 0.00 |
| ATOM | 359 | C   | CYX | 24 | -3.965 | 5.383  | -3.547 | 1.00 | 0.00 |
| ATOM | 360 | O   | CYX | 24 | -4.289 | 5.816  | -2.463 | 1.00 | 0.00 |
| ATOM | 361 | N   | GLY | 25 | -2.822 | 5.710  | -4.153 | 1.00 | 0.00 |
| ATOM | 362 | H   | GLY | 25 | -2.651 | 5.337  | -5.076 | 1.00 | 0.00 |
| ATOM | 363 | CA  | GLY | 25 | -1.823 | 6.562  | -3.566 | 1.00 | 0.00 |
| ATOM | 364 | HA2 | GLY | 25 | -1.633 | 6.233  | -2.545 | 1.00 | 0.00 |
| ATOM | 365 | HA3 | GLY | 25 | -0.905 | 6.484  | -4.149 | 1.00 | 0.00 |
| ATOM | 366 | C   | GLY | 25 | -2.268 | 8.003  | -3.542 | 1.00 | 0.00 |
| ATOM | 367 | O   | GLY | 25 | -2.232 | 8.616  | -2.492 | 1.00 | 0.00 |
| ATOM | 368 | N   | MET | 26 | -2.807 | 8.521  | -4.637 | 1.00 | 0.00 |
| ATOM | 369 | H   | MET | 26 | -2.938 | 7.895  | -5.419 | 1.00 | 0.00 |
| ATOM | 370 | CA  | MET | 26 | -3.252 | 9.885  | -4.772 | 1.00 | 0.00 |
| ATOM | 371 | HA  | MET | 26 | -2.401 | 10.560 | -4.672 | 1.00 | 0.00 |
| ATOM | 372 | CB  | MET | 26 | -3.897 | 10.113 | -6.136 | 1.00 | 0.00 |



|      |     |         |    |        |        |         |      |      |
|------|-----|---------|----|--------|--------|---------|------|------|
| ATOM | 373 | HB2 MET | 26 | -3.829 | 9.192  | -6.714  | 1.00 | 0.00 |
| ATOM | 374 | HB3 MET | 26 | -4.945 | 10.373 | -5.989  | 1.00 | 0.00 |
| ATOM | 375 | CG MET  | 26 | -3.198 | 11.235 | -6.888  | 1.00 | 0.00 |
| ATOM | 376 | HG2 MET | 26 | -3.808 | 12.138 | -6.841  | 1.00 | 0.00 |
| ATOM | 377 | HG3 MET | 26 | -2.228 | 11.428 | -6.430  | 1.00 | 0.00 |
| ATOM | 378 | SD MET  | 26 | -2.957 | 10.775 | -8.610  | 1.00 | 0.00 |
| ATOM | 379 | CE MET  | 26 | -1.621 | 11.910 | -9.040  | 1.00 | 0.00 |
| ATOM | 380 | HE1 MET | 26 | -0.759 | 11.716 | -8.402  | 1.00 | 0.00 |
| ATOM | 381 | HE2 MET | 26 | -1.340 | 11.764 | -10.083 | 1.00 | 0.00 |
| ATOM | 382 | HE3 MET | 26 | -1.955 | 12.938 | -8.896  | 1.00 | 0.00 |
| ATOM | 383 | C MET   | 26 | -4.298 | 10.190 | -3.745  | 1.00 | 0.00 |
| ATOM | 384 | O MET   | 26 | -4.217 | 11.233 | -3.141  | 1.00 | 0.00 |
| ATOM | 385 | N TYR   | 27 | -5.306 | 9.342  | -3.579  | 1.00 | 0.00 |
| ATOM | 386 | H TYR   | 27 | -5.358 | 8.537  | -4.186  | 1.00 | 0.00 |
| ATOM | 387 | CA TYR  | 27 | -6.331 | 9.506  | -2.560  | 1.00 | 0.00 |
| ATOM | 388 | HA TYR  | 27 | -7.051 | 10.278 | -2.833  | 1.00 | 0.00 |
| ATOM | 389 | CB TYR  | 27 | -7.061 | 8.171  | -2.461  | 1.00 | 0.00 |
| ATOM | 390 | HB2 TYR | 27 | -7.496 | 7.980  | -3.442  | 1.00 | 0.00 |
| ATOM | 391 | HB3 TYR | 27 | -6.318 | 7.405  | -2.238  | 1.00 | 0.00 |
| ATOM | 392 | CG TYR  | 27 | -8.149 | 8.138  | -1.413  | 1.00 | 0.00 |
| ATOM | 393 | CD1 TYR | 27 | -9.298 | 8.929  | -1.580  | 1.00 | 0.00 |
| ATOM | 394 | HD1 TYR | 27 | -9.403 | 9.561  | -2.463  | 1.00 | 0.00 |

|      |     |          |    |         |        |        |      |      |
|------|-----|----------|----|---------|--------|--------|------|------|
| ATOM | 395 | CE1 TYR  | 27 | -10.314 | 8.906  | -0.607 | 1.00 | 0.00 |
| ATOM | 396 | HE1 TYR  | 27 | -11.217 | 9.500  | -0.747 | 1.00 | 0.00 |
| ATOM | 397 | CZ TYR   | 27 | -10.179 | 8.083  | 0.531  | 1.00 | 0.00 |
| ATOM | 398 | OH TYR   | 27 | -11.143 | 8.069  | 1.490  | 1.00 | 0.00 |
| ATOM | 399 | HH TYR   | 27 | -11.875 | 8.658  | 1.294  | 1.00 | 0.00 |
| ATOM | 400 | CE2 TYR  | 27 | -9.024  | 7.299  | 0.699  | 1.00 | 0.00 |
| ATOM | 401 | HE2 TYR  | 27 | -8.919  | 6.668  | 1.581  | 1.00 | 0.00 |
| ATOM | 402 | CD2 TYR  | 27 | -8.005  | 7.329  | -0.270 | 1.00 | 0.00 |
| ATOM | 403 | HD2 TYR  | 27 | -7.106  | 6.727  | -0.135 | 1.00 | 0.00 |
| ATOM | 404 | C TYR    | 27 | -5.754  | 9.855  | -1.192 | 1.00 | 0.00 |
| ATOM | 405 | O TYR    | 27 | -6.294  | 10.693 | -0.478 | 1.00 | 0.00 |
| ATOM | 406 | N LEU    | 28 | -4.598  | 9.278  | -0.883 | 1.00 | 0.00 |
| ATOM | 407 | H LEU    | 28 | -4.197  | 8.616  | -1.532 | 1.00 | 0.00 |
| ATOM | 408 | CA LEU   | 28 | -3.918  | 9.507  | 0.369  | 1.00 | 0.00 |
| ATOM | 409 | HA LEU   | 28 | -4.640  | 9.804  | 1.130  | 1.00 | 0.00 |
| ATOM | 410 | CB LEU   | 28 | -3.210  | 8.244  | 0.836  | 1.00 | 0.00 |
| ATOM | 411 | HB2 LEU  | 28 | -2.257  | 8.311  | 0.310  | 1.00 | 0.00 |
| ATOM | 412 | HB3 LEU  | 28 | -3.035  | 8.286  | 1.911  | 1.00 | 0.00 |
| ATOM | 413 | CG LEU   | 28 | -3.901  | 6.915  | 0.480  | 1.00 | 0.00 |
| ATOM | 414 | HG LEU   | 28 | -4.601  | 7.098  | -0.336 | 1.00 | 0.00 |
| ATOM | 415 | CD1 LEU  | 28 | -2.894  | 5.858  | 0.056  | 1.00 | 0.00 |
| ATOM | 416 | HD11 LEU | 28 | -2.194  | 5.675  | 0.871  | 1.00 | 0.00 |

|      |     |      |     |    |        |        |        |      |      |
|------|-----|------|-----|----|--------|--------|--------|------|------|
| ATOM | 417 | HD12 | LEU | 28 | -3.417 | 4.934  | -0.188 | 1.00 | 0.00 |
| ATOM | 418 | HD13 | LEU | 28 | -2.347 | 6.207  | -0.820 | 1.00 | 0.00 |
| ATOM | 419 | CD2  | LEU | 28 | -4.764 | 6.442  | 1.612  | 1.00 | 0.00 |
| ATOM | 420 | HD21 | LEU | 28 | -5.529 | 7.190  | 1.823  | 1.00 | 0.00 |
| ATOM | 421 | HD22 | LEU | 28 | -5.242 | 5.502  | 1.337  | 1.00 | 0.00 |
| ATOM | 422 | HD23 | LEU | 28 | -4.149 | 6.291  | 2.499  | 1.00 | 0.00 |
| ATOM | 423 | C    | LEU | 28 | -2.941 | 10.660 | 0.211  | 1.00 | 0.00 |
| ATOM | 424 | O    | LEU | 28 | -2.725 | 11.394 | 1.158  | 1.00 | 0.00 |
| ATOM | 425 | N    | MET | 29 | -2.451 | 10.918 | -0.998 | 1.00 | 0.00 |
| ATOM | 426 | H    | MET | 29 | -2.643 | 10.211 | -1.693 | 1.00 | 0.00 |
| ATOM | 427 | CA   | MET | 29 | -1.613 | 12.033 | -1.371 | 1.00 | 0.00 |
| ATOM | 428 | HA   | MET | 29 | -0.971 | 12.320 | -0.538 | 1.00 | 0.00 |
| ATOM | 429 | CB   | MET | 29 | -0.732 | 11.635 | -2.550 | 1.00 | 0.00 |
| ATOM | 430 | HB2  | MET | 29 | -0.934 | 10.594 | -2.802 | 1.00 | 0.00 |
| ATOM | 431 | HB3  | MET | 29 | -0.980 | 12.269 | -3.402 | 1.00 | 0.00 |
| ATOM | 432 | CG   | MET | 29 | 0.739  | 11.797 | -2.210 | 1.00 | 0.00 |
| ATOM | 433 | HG2  | MET | 29 | 0.914  | 11.393 | -1.214 | 1.00 | 0.00 |
| ATOM | 434 | HG3  | MET | 29 | 1.329  | 11.239 | -2.937 | 1.00 | 0.00 |
| ATOM | 435 | SD   | MET | 29 | 1.239  | 13.521 | -2.243 | 1.00 | 0.00 |
| ATOM | 436 | CE   | MET | 29 | 1.234  | 13.769 | -4.028 | 1.00 | 0.00 |
| ATOM | 437 | HE1  | MET | 29 | 0.235  | 13.580 | -4.419 | 1.00 | 0.00 |
| ATOM | 438 | HE2  | MET | 29 | 1.523  | 14.796 | -4.254 | 1.00 | 0.00 |

|      |     |     |     |    |        |        |        |      |      |
|------|-----|-----|-----|----|--------|--------|--------|------|------|
| ATOM | 439 | HE3 | MET | 29 | 1.942  | 13.083 | -4.493 | 1.00 | 0.00 |
| ATOM | 440 | C   | MET | 29 | -2.401 | 13.304 | -1.670 | 1.00 | 0.00 |
| ATOM | 441 | O   | MET | 29 | -1.867 | 14.295 | -2.155 | 1.00 | 0.00 |
| ATOM | 442 | N   | LYS | 30 | -3.709 | 13.287 | -1.443 | 1.00 | 0.00 |
| ATOM | 443 | H   | LYS | 30 | -4.132 | 12.428 | -1.124 | 1.00 | 0.00 |
| ATOM | 444 | CA  | LYS | 30 | -4.569 | 14.417 | -1.709 | 1.00 | 0.00 |
| ATOM | 445 | HA  | LYS | 30 | -4.227 | 14.953 | -2.595 | 1.00 | 0.00 |
| ATOM | 446 | CB  | LYS | 30 | -5.999 | 13.923 | -1.957 | 1.00 | 0.00 |
| ATOM | 447 | HB2 | LYS | 30 | -6.068 | 12.869 | -1.691 | 1.00 | 0.00 |
| ATOM | 448 | HB3 | LYS | 30 | -6.691 | 14.499 | -1.343 | 1.00 | 0.00 |
| ATOM | 449 | CG  | LYS | 30 | -6.360 | 14.100 | -3.437 | 1.00 | 0.00 |
| ATOM | 450 | HG2 | LYS | 30 | -5.449 | 14.057 | -4.035 | 1.00 | 0.00 |
| ATOM | 451 | HG3 | LYS | 30 | -7.031 | 13.297 | -3.740 | 1.00 | 0.00 |
| ATOM | 452 | CD  | LYS | 30 | -7.050 | 15.451 | -3.655 | 1.00 | 0.00 |
| ATOM | 453 | HD2 | LYS | 30 | -7.958 | 15.275 | -4.231 | 1.00 | 0.00 |
| ATOM | 454 | HD3 | LYS | 30 | -7.313 | 15.856 | -2.678 | 1.00 | 0.00 |
| ATOM | 455 | CE  | LYS | 30 | -6.165 | 16.447 | -4.395 | 1.00 | 0.00 |
| ATOM | 456 | HE2 | LYS | 30 | -6.589 | 17.446 | -4.287 | 1.00 | 0.00 |
| ATOM | 457 | HE3 | LYS | 30 | -5.167 | 16.427 | -3.957 | 1.00 | 0.00 |
| ATOM | 458 | NZ  | LYS | 30 | -6.079 | 16.100 | -5.837 | 1.00 | 0.00 |
| ATOM | 459 | HZ1 | LYS | 30 | -7.003 | 16.119 | -6.244 | 1.00 | 0.00 |
| ATOM | 460 | HZ2 | LYS | 30 | -5.489 | 16.770 | -6.310 | 1.00 | 0.00 |

|      |     |      |     |    |        |        |        |      |      |
|------|-----|------|-----|----|--------|--------|--------|------|------|
| ATOM | 461 | HZ3  | LYS | 30 | -5.686 | 15.176 | -5.938 | 1.00 | 0.00 |
| ATOM | 462 | C    | LYS | 30 | -4.470 | 15.384 | -0.552 | 1.00 | 0.00 |
| ATOM | 463 | O    | LYS | 30 | -4.775 | 16.548 | -0.763 | 1.00 | 0.00 |
| ATOM | 464 | N    | ASN | 31 | -4.080 | 14.884 | 0.624  | 1.00 | 0.00 |
| ATOM | 465 | H    | ASN | 31 | -3.952 | 13.887 | 0.716  | 1.00 | 0.00 |
| ATOM | 466 | CA   | ASN | 31 | -3.843 | 15.721 | 1.790  | 1.00 | 0.00 |
| ATOM | 467 | HA   | ASN | 31 | -4.258 | 16.718 | 1.642  | 1.00 | 0.00 |
| ATOM | 468 | CB   | ASN | 31 | -4.533 | 15.077 | 2.995  | 1.00 | 0.00 |
| ATOM | 469 | HB2  | ASN | 31 | -4.513 | 13.990 | 2.930  | 1.00 | 0.00 |
| ATOM | 470 | HB3  | ASN | 31 | -3.997 | 15.398 | 3.888  | 1.00 | 0.00 |
| ATOM | 471 | CG   | ASN | 31 | -5.969 | 15.527 | 3.107  | 1.00 | 0.00 |
| ATOM | 472 | OD1  | ASN | 31 | -6.372 | 16.243 | 3.998  | 1.00 | 0.00 |
| ATOM | 473 | ND2  | ASN | 31 | -6.772 | 15.139 | 2.145  | 1.00 | 0.00 |
| ATOM | 474 | HD21 | ASN | 31 | -7.745 | 15.409 | 2.164  | 1.00 | 0.00 |
| ATOM | 475 | HD22 | ASN | 31 | -6.413 | 14.573 | 1.389  | 1.00 | 0.00 |
| ATOM | 476 | C    | ASN | 31 | -2.352 | 15.874 | 2.079  | 1.00 | 0.00 |
| ATOM | 477 | O    | ASN | 31 | -1.988 | 16.623 | 2.974  | 1.00 | 0.00 |
| ATOM | 478 | N    | LEU | 32 | -1.527 | 15.121 | 1.350  | 1.00 | 0.00 |
| ATOM | 479 | H    | LEU | 32 | -1.899 | 14.443 | 0.701  | 1.00 | 0.00 |
| ATOM | 480 | CA   | LEU | 32 | -0.106 | 15.189 | 1.521  | 1.00 | 0.00 |
| ATOM | 481 | HA   | LEU | 32 | 0.131  | 15.429 | 2.557  | 1.00 | 0.00 |
| ATOM | 482 | CB   | LEU | 32 | 0.537  | 13.853 | 1.171  | 1.00 | 0.00 |

|      |     |          |    |        |        |        |      |      |
|------|-----|----------|----|--------|--------|--------|------|------|
| ATOM | 483 | HB2 LEU  | 32 | 0.194  | 13.620 | 0.162  | 1.00 | 0.00 |
| ATOM | 484 | HB3 LEU  | 32 | 1.623  | 13.953 | 1.170  | 1.00 | 0.00 |
| ATOM | 485 | CG LEU   | 32 | 0.131  | 12.731 | 2.117  | 1.00 | 0.00 |
| ATOM | 486 | HG LEU   | 32 | -0.938 | 12.803 | 2.314  | 1.00 | 0.00 |
| ATOM | 487 | CD1 LEU  | 32 | 0.442  | 11.379 | 1.500  | 1.00 | 0.00 |
| ATOM | 488 | HD11 LEU | 32 | 1.512  | 11.307 | 1.302  | 1.00 | 0.00 |
| ATOM | 489 | HD12 LEU | 32 | 0.146  | 10.588 | 2.188  | 1.00 | 0.00 |
| ATOM | 490 | HD13 LEU | 32 | -0.108 | 11.271 | 0.565  | 1.00 | 0.00 |
| ATOM | 491 | CD2 LEU  | 32 | 0.836  | 12.891 | 3.451  | 1.00 | 0.00 |
| ATOM | 492 | HD21 LEU | 32 | 0.563  | 13.849 | 3.894  | 1.00 | 0.00 |
| ATOM | 493 | HD22 LEU | 32 | 0.538  | 12.084 | 4.119  | 1.00 | 0.00 |
| ATOM | 494 | HD23 LEU | 32 | 1.915  | 12.857 | 3.298  | 1.00 | 0.00 |
| ATOM | 495 | C LEU    | 32 | 0.454  | 16.314 | 0.694  | 1.00 | 0.00 |
| ATOM | 496 | O LEU    | 32 | 1.515  | 16.744 | 1.098  | 1.00 | 0.00 |
| ATOM | 497 | N GLY    | 33 | -0.259 | 16.778 | -0.359 | 1.00 | 0.00 |
| ATOM | 498 | H GLY    | 33 | -1.143 | 16.324 | -0.539 | 1.00 | 0.00 |
| ATOM | 499 | CA GLY   | 33 | 0.149  | 17.865 | -1.237 | 1.00 | 0.00 |
| ATOM | 500 | HA2 GLY  | 33 | -0.374 | 17.765 | -2.189 | 1.00 | 0.00 |
| ATOM | 501 | HA3 GLY  | 33 | -0.121 | 18.814 | -0.773 | 1.00 | 0.00 |
| ATOM | 502 | C GLY    | 33 | 1.652  | 17.849 | -1.493 | 1.00 | 0.00 |
| ATOM | 503 | O GLY    | 33 | 2.432  | 18.531 | -0.837 | 1.00 | 0.00 |
| ATOM | 504 | N GLU    | 34 | 2.058  | 17.104 | -2.513 | 1.00 | 0.00 |

|      |     |     |     |    |       |        |        |      |      |
|------|-----|-----|-----|----|-------|--------|--------|------|------|
| ATOM | 505 | H   | GLU | 34 | 1.401 | 16.566 | -3.059 | 1.00 | 0.00 |
| ATOM | 506 | CA  | GLU | 34 | 3.474 | 16.983 | -2.823 | 1.00 | 0.00 |
| ATOM | 507 | HA  | GLU | 34 | 4.052 | 16.984 | -1.899 | 1.00 | 0.00 |
| ATOM | 508 | CB  | GLU | 34 | 3.759 | 15.683 | -3.576 | 1.00 | 0.00 |
| ATOM | 509 | HB2 | GLU | 34 | 3.452 | 14.843 | -2.954 | 1.00 | 0.00 |
| ATOM | 510 | HB3 | GLU | 34 | 3.181 | 15.680 | -4.501 | 1.00 | 0.00 |
| ATOM | 511 | CG  | GLU | 34 | 5.248 | 15.556 | -3.905 | 1.00 | 0.00 |
| ATOM | 512 | HG2 | GLU | 34 | 5.393 | 14.557 | -4.315 | 1.00 | 0.00 |
| ATOM | 513 | HG3 | GLU | 34 | 5.524 | 16.299 | -4.654 | 1.00 | 0.00 |
| ATOM | 514 | CD  | GLU | 34 | 6.127 | 15.731 | -2.666 | 1.00 | 0.00 |
| ATOM | 515 | OE1 | GLU | 34 | 5.643 | 15.476 | -1.546 | 1.00 | 0.00 |
| ATOM | 516 | OE2 | GLU | 34 | 7.285 | 16.159 | -2.831 | 1.00 | 0.00 |
| ATOM | 517 | C   | GLU | 34 | 3.951 | 18.192 | -3.620 | 1.00 | 0.00 |
| ATOM | 518 | O   | GLU | 34 | 4.166 | 18.118 | -4.832 | 1.00 | 0.00 |
| ATOM | 519 | N   | ARG | 35 | 3.960 | 19.363 | -2.987 | 1.00 | 0.00 |
| ATOM | 520 | H   | ARG | 35 | 3.628 | 19.413 | -2.035 | 1.00 | 0.00 |
| ATOM | 521 | CA  | ARG | 35 | 4.400 | 20.588 | -3.626 | 1.00 | 0.00 |
| ATOM | 522 | HA  | ARG | 35 | 5.421 | 20.471 | -3.989 | 1.00 | 0.00 |
| ATOM | 523 | CB  | ARG | 35 | 3.488 | 20.925 | -4.822 | 1.00 | 0.00 |
| ATOM | 524 | HB2 | ARG | 35 | 3.195 | 20.000 | -5.317 | 1.00 | 0.00 |
| ATOM | 525 | HB3 | ARG | 35 | 2.599 | 21.439 | -4.457 | 1.00 | 0.00 |
| ATOM | 526 | CG  | ARG | 35 | 4.220 | 21.821 | -5.814 | 1.00 | 0.00 |

|      |     |      |     |    |       |        |         |      |      |
|------|-----|------|-----|----|-------|--------|---------|------|------|
| ATOM | 527 | HG2  | ARG | 35 | 3.603 | 22.698 | -6.015  | 1.00 | 0.00 |
| ATOM | 528 | HG3  | ARG | 35 | 5.164 | 22.136 | -5.370  | 1.00 | 0.00 |
| ATOM | 529 | CD   | ARG | 35 | 4.496 | 21.079 | -7.128  | 1.00 | 0.00 |
| ATOM | 530 | HD2  | ARG | 35 | 4.507 | 20.005 | -6.943  | 1.00 | 0.00 |
| ATOM | 531 | HD3  | ARG | 35 | 3.714 | 21.316 | -7.850  | 1.00 | 0.00 |
| ATOM | 532 | NE   | ARG | 35 | 5.795 | 21.472 | -7.696  | 1.00 | 0.00 |
| ATOM | 533 | HE   | ARG | 35 | 6.425 | 21.955 | -7.072  | 1.00 | 0.00 |
| ATOM | 534 | CZ   | ARG | 35 | 6.207 | 21.198 | -8.917  | 1.00 | 0.00 |
| ATOM | 535 | NH1  | ARG | 35 | 5.430 | 20.574 | -9.767  | 1.00 | 0.00 |
| ATOM | 536 | HH11 | ARG | 35 | 4.500 | 20.297 | -9.487  | 1.00 | 0.00 |
| ATOM | 537 | HH12 | ARG | 35 | 5.765 | 20.374 | -10.699 | 1.00 | 0.00 |
| ATOM | 538 | NH2  | ARG | 35 | 7.385 | 21.598 | -9.318  | 1.00 | 0.00 |
| ATOM | 539 | HH21 | ARG | 35 | 7.980 | 22.119 | -8.689  | 1.00 | 0.00 |
| ATOM | 540 | HH22 | ARG | 35 | 7.695 | 21.385 | -10.256 | 1.00 | 0.00 |
| ATOM | 541 | C    | ARG | 35 | 4.380 | 21.710 | -2.612  | 1.00 | 0.00 |
| ATOM | 542 | O    | ARG | 35 | 5.433 | 22.225 | -2.276  | 1.00 | 0.00 |
| ATOM | 543 | N    | SER | 36 | 3.175 | 22.141 | -2.228  | 1.00 | 0.00 |
| ATOM | 544 | H    | SER | 36 | 2.357 | 21.709 | -2.633  | 1.00 | 0.00 |
| ATOM | 545 | CA   | SER | 36 | 2.983 | 23.217 | -1.269  | 1.00 | 0.00 |
| ATOM | 546 | HA   | SER | 36 | 3.498 | 22.989 | -0.336  | 1.00 | 0.00 |
| ATOM | 547 | CB   | SER | 36 | 3.557 | 24.517 | -1.839  | 1.00 | 0.00 |
| ATOM | 548 | HB2  | SER | 36 | 4.635 | 24.405 | -1.954  | 1.00 | 0.00 |



|      |     |      |     |    |        |        |        |      |      |
|------|-----|------|-----|----|--------|--------|--------|------|------|
| ATOM | 549 | HB3  | SER | 36 | 3.106  | 24.704 | -2.814 | 1.00 | 0.00 |
| ATOM | 550 | OG   | SER | 36 | 3.288  | 25.598 | -0.985 | 1.00 | 0.00 |
| ATOM | 551 | HG   | SER | 36 | 3.656  | 26.402 | -1.361 | 1.00 | 0.00 |
| ATOM | 552 | C    | SER | 36 | 1.499  | 23.385 | -0.977 | 1.00 | 0.00 |
| ATOM | 553 | O    | SER | 36 | 1.050  | 23.166 | 0.141  | 1.00 | 0.00 |
| ATOM | 554 | N    | GLN | 37 | 0.717  | 23.722 | -2.009 | 1.00 | 0.00 |
| ATOM | 555 | H    | GLN | 37 | 1.132  | 23.891 | -2.915 | 1.00 | 0.00 |
| ATOM | 556 | CA   | GLN | 37 | -0.719 | 23.920 | -1.860 | 1.00 | 0.00 |
| ATOM | 557 | HA   | GLN | 37 | -1.154 | 23.098 | -1.293 | 1.00 | 0.00 |
| ATOM | 558 | CB   | GLN | 37 | -0.989 | 25.226 | -1.112 | 1.00 | 0.00 |
| ATOM | 559 | HB2  | GLN | 37 | -0.265 | 25.340 | -0.305 | 1.00 | 0.00 |
| ATOM | 560 | HB3  | GLN | 37 | -0.898 | 26.066 | -1.802 | 1.00 | 0.00 |
| ATOM | 561 | CG   | GLN | 37 | -2.403 | 25.197 | -0.528 | 1.00 | 0.00 |
| ATOM | 562 | HG2  | GLN | 37 | -3.132 | 25.366 | -1.321 | 1.00 | 0.00 |
| ATOM | 563 | HG3  | GLN | 37 | -2.570 | 24.216 | -0.084 | 1.00 | 0.00 |
| ATOM | 564 | CD   | GLN | 37 | -2.599 | 26.256 | 0.545  | 1.00 | 0.00 |
| ATOM | 565 | OE1  | GLN | 37 | -1.697 | 26.946 | 0.981  | 1.00 | 0.00 |
| ATOM | 566 | NE2  | GLN | 37 | -3.822 | 26.425 | 0.995  | 1.00 | 0.00 |
| ATOM | 567 | HE21 | GLN | 37 | -4.003 | 27.117 | 1.708  | 1.00 | 0.00 |
| ATOM | 568 | HE22 | GLN | 37 | -4.575 | 25.863 | 0.625  | 1.00 | 0.00 |
| ATOM | 569 | C    | GLN | 37 | -1.401 | 23.915 | -3.220 | 1.00 | 0.00 |
| ATOM | 570 | O    | GLN | 37 | -1.788 | 24.942 | -3.772 | 1.00 | 0.00 |

|      |     |      |     |    |        |        |        |      |      |
|------|-----|------|-----|----|--------|--------|--------|------|------|
| ATOM | 571 | N    | VAL | 38 | -1.420 | 22.744 | -3.845 | 1.00 | 0.00 |
| ATOM | 572 | H    | VAL | 38 | -0.910 | 21.956 | -3.473 | 1.00 | 0.00 |
| ATOM | 573 | CA   | VAL | 38 | -2.076 | 22.594 | -5.136 | 1.00 | 0.00 |
| ATOM | 574 | HA   | VAL | 38 | -1.863 | 23.432 | -5.801 | 1.00 | 0.00 |
| ATOM | 575 | CB   | VAL | 38 | -1.612 | 21.303 | -5.813 | 1.00 | 0.00 |
| ATOM | 576 | HB   | VAL | 38 | -2.139 | 21.178 | -6.759 | 1.00 | 0.00 |
| ATOM | 577 | CG1  | VAL | 38 | -0.102 | 21.379 | -6.076 | 1.00 | 0.00 |
| ATOM | 578 | HG11 | VAL | 38 | 0.426  | 21.504 | -5.131 | 1.00 | 0.00 |
| ATOM | 579 | HG12 | VAL | 38 | 0.230  | 20.460 | -6.559 | 1.00 | 0.00 |
| ATOM | 580 | HG13 | VAL | 38 | 0.112  | 22.228 | -6.726 | 1.00 | 0.00 |
| ATOM | 581 | CG2  | VAL | 38 | -1.939 | 20.066 | -4.968 | 1.00 | 0.00 |
| ATOM | 582 | HG21 | VAL | 38 | -3.016 | 20.004 | -4.817 | 1.00 | 0.00 |
| ATOM | 583 | HG22 | VAL | 38 | -1.593 | 19.171 | -5.485 | 1.00 | 0.00 |
| ATOM | 584 | HG23 | VAL | 38 | -1.440 | 20.144 | -4.002 | 1.00 | 0.00 |
| ATOM | 585 | C    | VAL | 38 | -3.587 | 22.665 | -4.983 | 1.00 | 0.00 |
| ATOM | 586 | O    | VAL | 38 | -4.091 | 22.686 | -3.859 | 1.00 | 0.00 |
| ATOM | 587 | N    | SER | 39 | -4.298 | 22.673 | -6.116 | 1.00 | 0.00 |
| ATOM | 588 | H    | SER | 39 | -3.821 | 22.726 | -7.005 | 1.00 | 0.00 |
| ATOM | 589 | CA   | SER | 39 | -5.750 | 22.697 | -6.112 | 1.00 | 0.00 |
| ATOM | 590 | HA   | SER | 39 | -6.099 | 23.650 | -5.714 | 1.00 | 0.00 |
| ATOM | 591 | CB   | SER | 39 | -6.305 | 22.527 | -7.541 | 1.00 | 0.00 |
| ATOM | 592 | HB2  | SER | 39 | -7.139 | 23.219 | -7.661 | 1.00 | 0.00 |

|      |     |     |     |    |         |        |        |      |      |
|------|-----|-----|-----|----|---------|--------|--------|------|------|
| ATOM | 593 | HB3 | SER | 39 | -5.512  | 22.790 | -8.242 | 1.00 | 0.00 |
| ATOM | 594 | OG  | SER | 39 | -6.747  | 21.202 | -7.802 | 1.00 | 0.00 |
| ATOM | 595 | HG  | SER | 39 | -7.082  | 21.148 | -8.700 | 1.00 | 0.00 |
| ATOM | 596 | C   | SER | 39 | -6.328  | 21.631 | -5.168 | 1.00 | 0.00 |
| ATOM | 597 | O   | SER | 39 | -5.693  | 20.622 | -4.821 | 1.00 | 0.00 |
| ATOM | 598 | N   | PRO | 40 | -7.617  | 21.771 | -4.854 | 1.00 | 0.00 |
| ATOM | 599 | CD  | PRO | 40 | -8.516  | 22.821 | -5.304 | 1.00 | 0.00 |
| ATOM | 600 | HD2 | PRO | 40 | -8.661  | 22.700 | -6.378 | 1.00 | 0.00 |
| ATOM | 601 | HD3 | PRO | 40 | -8.035  | 23.780 | -5.110 | 1.00 | 0.00 |
| ATOM | 602 | CG  | PRO | 40 | -9.810  | 22.649 | -4.514 | 1.00 | 0.00 |
| ATOM | 603 | HG2 | PRO | 40 | -10.621 | 22.416 | -5.204 | 1.00 | 0.00 |
| ATOM | 604 | HG3 | PRO | 40 | -10.035 | 23.579 | -3.992 | 1.00 | 0.00 |
| ATOM | 605 | CB  | PRO | 40 | -9.574  | 21.511 | -3.525 | 1.00 | 0.00 |
| ATOM | 606 | HB2 | PRO | 40 | -10.409 | 20.812 | -3.553 | 1.00 | 0.00 |
| ATOM | 607 | HB3 | PRO | 40 | -9.443  | 21.880 | -2.508 | 1.00 | 0.00 |
| ATOM | 608 | CA  | PRO | 40 | -8.291  | 20.811 | -3.998 | 1.00 | 0.00 |
| ATOM | 609 | HA  | PRO | 40 | -7.659  | 20.619 | -3.132 | 1.00 | 0.00 |
| ATOM | 610 | C   | PRO | 40 | -8.564  | 19.495 | -4.732 | 1.00 | 0.00 |
| ATOM | 611 | O   | PRO | 40 | -8.003  | 19.165 | -5.784 | 1.00 | 0.00 |
| ATOM | 612 | N   | ARG | 41 | -9.421  | 18.663 | -4.147 | 1.00 | 0.00 |
| ATOM | 613 | H   | ARG | 41 | -9.757  | 18.885 | -3.221 | 1.00 | 0.00 |
| ATOM | 614 | CA  | ARG | 41 | -9.842  | 17.425 | -4.747 | 1.00 | 0.00 |

|      |     |      |     |    |         |        |        |      |      |
|------|-----|------|-----|----|---------|--------|--------|------|------|
| ATOM | 615 | HA   | ARG | 41 | -8.995  | 16.948 | -5.240 | 1.00 | 0.00 |
| ATOM | 616 | CB   | ARG | 41 | -10.391 | 16.471 | -3.683 | 1.00 | 0.00 |
| ATOM | 617 | HB2  | ARG | 41 | -9.764  | 16.532 | -2.794 | 1.00 | 0.00 |
| ATOM | 618 | HB3  | ARG | 41 | -11.409 | 16.767 | -3.431 | 1.00 | 0.00 |
| ATOM | 619 | CG   | ARG | 41 | -10.393 | 15.025 | -4.211 | 1.00 | 0.00 |
| ATOM | 620 | HG2  | ARG | 41 | -9.811  | 15.005 | -5.133 | 1.00 | 0.00 |
| ATOM | 621 | HG3  | ARG | 41 | -9.911  | 14.395 | -3.464 | 1.00 | 0.00 |
| ATOM | 622 | CD   | ARG | 41 | -11.800 | 14.502 | -4.487 | 1.00 | 0.00 |
| ATOM | 623 | HD2  | ARG | 41 | -12.527 | 15.294 | -4.305 | 1.00 | 0.00 |
| ATOM | 624 | HD3  | ARG | 41 | -11.872 | 14.175 | -5.525 | 1.00 | 0.00 |
| ATOM | 625 | NE   | ARG | 41 | -12.111 | 13.371 | -3.617 | 1.00 | 0.00 |
| ATOM | 626 | HE   | ARG | 41 | -12.039 | 12.453 | -4.030 | 1.00 | 0.00 |
| ATOM | 627 | CZ   | ARG | 41 | -12.571 | 13.473 | -2.383 | 1.00 | 0.00 |
| ATOM | 628 | NH1  | ARG | 41 | -12.721 | 14.644 | -1.811 | 1.00 | 0.00 |
| ATOM | 629 | HH11 | ARG | 41 | -12.482 | 15.485 | -2.318 | 1.00 | 0.00 |
| ATOM | 630 | HH12 | ARG | 41 | -13.074 | 14.700 | -0.867 | 1.00 | 0.00 |
| ATOM | 631 | NH2  | ARG | 41 | -12.779 | 12.394 | -1.682 | 1.00 | 0.00 |
| ATOM | 632 | HH21 | ARG | 41 | -12.587 | 11.489 | -2.086 | 1.00 | 0.00 |
| ATOM | 633 | HH22 | ARG | 41 | -13.131 | 12.469 | -0.739 | 1.00 | 0.00 |
| ATOM | 634 | C    | ARG | 41 | -10.871 | 17.688 | -5.823 | 1.00 | 0.00 |
| ATOM | 635 | O    | ARG | 41 | -11.884 | 17.033 | -5.815 | 1.00 | 0.00 |
| ATOM | 636 | N    | MET | 42 | -10.623 | 18.620 | -6.730 | 1.00 | 0.00 |

|      |     |     |     |    |         |        |         |      |      |
|------|-----|-----|-----|----|---------|--------|---------|------|------|
| ATOM | 637 | H   | MET | 42 | -9.768  | 19.155 | -6.664  | 1.00 | 0.00 |
| ATOM | 638 | CA  | MET | 42 | -11.535 | 18.911 | -7.824  | 1.00 | 0.00 |
| ATOM | 639 | HA  | MET | 42 | -12.410 | 19.451 | -7.462  | 1.00 | 0.00 |
| ATOM | 640 | CB  | MET | 42 | -10.811 | 19.785 | -8.849  | 1.00 | 0.00 |
| ATOM | 641 | HB2 | MET | 42 | -11.431 | 19.858 | -9.743  | 1.00 | 0.00 |
| ATOM | 642 | HB3 | MET | 42 | -10.672 | 20.778 | -8.422  | 1.00 | 0.00 |
| ATOM | 643 | CG  | MET | 42 | -9.443  | 19.193 | -9.223  | 1.00 | 0.00 |
| ATOM | 644 | HG2 | MET | 42 | -8.701  | 19.598 | -8.534  | 1.00 | 0.00 |
| ATOM | 645 | HG3 | MET | 42 | -9.500  | 18.112 | -9.101  | 1.00 | 0.00 |
| ATOM | 646 | SD  | MET | 42 | -8.950  | 19.573 | -10.913 | 1.00 | 0.00 |
| ATOM | 647 | CE  | MET | 42 | -8.477  | 21.305 | -10.661 | 1.00 | 0.00 |
| ATOM | 648 | HE1 | MET | 42 | -7.672  | 21.360 | -9.928  | 1.00 | 0.00 |
| ATOM | 649 | HE2 | MET | 42 | -8.136  | 21.731 | -11.606 | 1.00 | 0.00 |
| ATOM | 650 | HE3 | MET | 42 | -9.337  | 21.868 | -10.299 | 1.00 | 0.00 |
| ATOM | 651 | C   | MET | 42 | -12.023 | 17.638 | -8.527  | 1.00 | 0.00 |
| ATOM | 652 | O   | MET | 42 | -13.119 | 17.633 | -9.060  | 1.00 | 0.00 |
| ATOM | 653 | N   | ARG | 43 | -11.193 | 16.577 | -8.509  | 1.00 | 0.00 |
| ATOM | 654 | H   | ARG | 43 | -10.253 | 16.708 | -8.164  | 1.00 | 0.00 |
| ATOM | 655 | CA  | ARG | 43 | -11.553 | 15.287 | -9.034  | 1.00 | 0.00 |
| ATOM | 656 | HA  | ARG | 43 | -11.691 | 15.354 | -10.114 | 1.00 | 0.00 |
| ATOM | 657 | CB  | ARG | 43 | -10.451 | 14.261 | -8.744  | 1.00 | 0.00 |
| ATOM | 658 | HB2 | ARG | 43 | -9.530  | 14.779 | -8.473  | 1.00 | 0.00 |

|      |     |      |     |    |         |        |         |      |      |
|------|-----|------|-----|----|---------|--------|---------|------|------|
| ATOM | 659 | HB3  | ARG | 43 | -10.759 | 13.615 | -7.923  | 1.00 | 0.00 |
| ATOM | 660 | CG   | ARG | 43 | -10.210 | 13.414 | -9.998  | 1.00 | 0.00 |
| ATOM | 661 | HG2  | ARG | 43 | -9.915  | 12.409 | -9.697  | 1.00 | 0.00 |
| ATOM | 662 | HG3  | ARG | 43 | -11.133 | 13.364 | -10.576 | 1.00 | 0.00 |
| ATOM | 663 | CD   | ARG | 43 | -9.101  | 14.036 | -10.859 | 1.00 | 0.00 |
| ATOM | 664 | HD2  | ARG | 43 | -9.137  | 13.609 | -11.862 | 1.00 | 0.00 |
| ATOM | 665 | HD3  | ARG | 43 | -9.250  | 15.115 | -10.919 | 1.00 | 0.00 |
| ATOM | 666 | NE   | ARG | 43 | -7.765  | 13.773 | -10.279 | 1.00 | 0.00 |
| ATOM | 667 | HE   | ARG | 43 | -7.705  | 12.993 | -9.642  | 1.00 | 0.00 |
| ATOM | 668 | CZ   | ARG | 43 | -6.657  | 14.423 | -10.585 | 1.00 | 0.00 |
| ATOM | 669 | NH1  | ARG | 43 | -6.674  | 15.415 | -11.434 | 1.00 | 0.00 |
| ATOM | 670 | HH11 | ARG | 43 | -7.544  | 15.693 | -11.865 | 1.00 | 0.00 |
| ATOM | 671 | HH12 | ARG | 43 | -5.816  | 15.901 | -11.656 | 1.00 | 0.00 |
| ATOM | 672 | NH2  | ARG | 43 | -5.532  | 14.129 | -9.977  | 1.00 | 0.00 |
| ATOM | 673 | HH21 | ARG | 43 | -5.516  | 13.404 | -9.275  | 1.00 | 0.00 |
| ATOM | 674 | HH22 | ARG | 43 | -4.687  | 14.630 | -10.215 | 1.00 | 0.00 |
| ATOM | 675 | C    | ARG | 43 | -12.894 | 14.842 | -8.471  | 1.00 | 0.00 |
| ATOM | 676 | O    | ARG | 43 | -13.137 | 14.952 | -7.277  | 1.00 | 0.00 |
| ATOM | 677 | N    | GLU | 44 | -13.685 | 14.218 | -9.306  | 1.00 | 0.00 |
| ATOM | 678 | H    | GLU | 44 | -13.422 | 14.137 | -10.278 | 1.00 | 0.00 |
| ATOM | 679 | CA   | GLU | 44 | -14.972 | 13.672 | -8.890  | 1.00 | 0.00 |
| ATOM | 680 | HA   | GLU | 44 | -15.189 | 13.968 | -7.864  | 1.00 | 0.00 |

|      |     |     |     |    |         |        |         |      |      |
|------|-----|-----|-----|----|---------|--------|---------|------|------|
| ATOM | 681 | CB  | GLU | 44 | -16.082 | 14.204 | -9.797  | 1.00 | 0.00 |
| ATOM | 682 | HB2 | GLU | 44 | -17.026 | 13.762 | -9.481  | 1.00 | 0.00 |
| ATOM | 683 | HB3 | GLU | 44 | -16.131 | 15.287 | -9.682  | 1.00 | 0.00 |
| ATOM | 684 | CG  | GLU | 44 | -15.823 | 13.857 | -11.277 | 1.00 | 0.00 |
| ATOM | 685 | HG2 | GLU | 44 | -15.656 | 14.755 | -11.873 | 1.00 | 0.00 |
| ATOM | 686 | HG3 | GLU | 44 | -14.920 | 13.247 | -11.280 | 1.00 | 0.00 |
| ATOM | 687 | CD  | GLU | 44 | -16.982 | 13.056 | -11.875 | 1.00 | 0.00 |
| ATOM | 688 | OE1 | GLU | 44 | -16.992 | 11.826 | -11.645 | 1.00 | 0.00 |
| ATOM | 689 | OE2 | GLU | 44 | -17.861 | 13.709 | -12.484 | 1.00 | 0.00 |
| ATOM | 690 | C   | GLU | 44 | -14.949 | 12.142 | -8.917  | 1.00 | 0.00 |
| ATOM | 691 | O   | GLU | 44 | -15.680 | 11.500 | -8.172  | 1.00 | 0.00 |
| ATOM | 692 | N   | GLU | 45 | -13.997 | 11.569 | -9.662  | 1.00 | 0.00 |
| ATOM | 693 | H   | GLU | 45 | -13.349 | 12.152 | -10.173 | 1.00 | 0.00 |
| ATOM | 694 | CA  | GLU | 45 | -13.890 | 10.136 | -9.808  | 1.00 | 0.00 |
| ATOM | 695 | HA  | GLU | 45 | -14.886 | 9.697  | -9.857  | 1.00 | 0.00 |
| ATOM | 696 | CB  | GLU | 45 | -13.131 | 9.775  | -11.094 | 1.00 | 0.00 |
| ATOM | 697 | HB2 | GLU | 45 | -12.604 | 10.658 | -11.456 | 1.00 | 0.00 |
| ATOM | 698 | HB3 | GLU | 45 | -12.411 | 8.988  | -10.874 | 1.00 | 0.00 |
| ATOM | 699 | CG  | GLU | 45 | -14.112 | 9.285  | -12.174 | 1.00 | 0.00 |
| ATOM | 700 | HG2 | GLU | 45 | -14.357 | 8.224  | -12.195 | 1.00 | 0.00 |
| ATOM | 701 | HG3 | GLU | 45 | -14.987 | 9.854  | -11.860 | 1.00 | 0.00 |
| ATOM | 702 | CD  | GLU | 45 | -13.686 | 9.737  | -13.572 | 1.00 | 0.00 |

|      |     |     |     |    |         |        |         |      |      |
|------|-----|-----|-----|----|---------|--------|---------|------|------|
| ATOM | 703 | OE1 | GLU | 45 | -13.773 | 10.954 | -13.844 | 1.00 | 0.00 |
| ATOM | 704 | OE2 | GLU | 45 | -13.059 | 8.902  | -14.267 | 1.00 | 0.00 |
| ATOM | 705 | C   | GLU | 45 | -13.191 | 9.594  | -8.572  | 1.00 | 0.00 |
| ATOM | 706 | O   | GLU | 45 | -12.013 | 9.898  | -8.311  | 1.00 | 0.00 |
| ATOM | 707 | N   | ASP | 46 | -13.908 | 8.761  | -7.826  | 1.00 | 0.00 |
| ATOM | 708 | H   | ASP | 46 | -14.853 | 8.538  | -8.103  | 1.00 | 0.00 |
| ATOM | 709 | CA  | ASP | 46 | -13.385 | 8.158  | -6.619  | 1.00 | 0.00 |
| ATOM | 710 | HA  | ASP | 46 | -12.984 | 8.934  | -5.967  | 1.00 | 0.00 |
| ATOM | 711 | CB  | ASP | 46 | -14.486 | 7.405  | -5.866  | 1.00 | 0.00 |
| ATOM | 712 | HB2 | ASP | 46 | -15.361 | 8.038  | -6.013  | 1.00 | 0.00 |
| ATOM | 713 | HB3 | ASP | 46 | -14.674 | 6.421  | -6.295  | 1.00 | 0.00 |
| ATOM | 714 | CG  | ASP | 46 | -14.204 | 7.264  | -4.367  | 1.00 | 0.00 |
| ATOM | 715 | OD1 | ASP | 46 | -13.177 | 7.819  | -3.898  | 1.00 | 0.00 |
| ATOM | 716 | OD2 | ASP | 46 | -14.950 | 6.514  | -3.707  | 1.00 | 0.00 |
| ATOM | 717 | C   | ASP | 46 | -12.275 | 7.181  | -6.992  | 1.00 | 0.00 |
| ATOM | 718 | O   | ASP | 46 | -12.340 | 6.440  | -7.985  | 1.00 | 0.00 |
| ATOM | 719 | N   | HID | 47 | -11.197 | 7.162  | -6.220  | 1.00 | 0.00 |
| ATOM | 720 | H   | HID | 47 | -11.115 | 7.822  | -5.460  | 1.00 | 0.00 |
| ATOM | 721 | CA  | HID | 47 | -10.086 | 6.258  | -6.470  | 1.00 | 0.00 |
| ATOM | 722 | HA  | HID | 47 | -10.325 | 5.587  | -7.295  | 1.00 | 0.00 |
| ATOM | 723 | CB  | HID | 47 | -8.844  | 7.060  | -6.840  | 1.00 | 0.00 |
| ATOM | 724 | HB2 | HID | 47 | -8.666  | 7.862  | -6.123  | 1.00 | 0.00 |



|      |     |     |     |    |         |       |         |      |      |
|------|-----|-----|-----|----|---------|-------|---------|------|------|
| ATOM | 725 | HB3 | HID | 47 | -7.967  | 6.415 | -6.889  | 1.00 | 0.00 |
| ATOM | 726 | CG  | HID | 47 | -8.974  | 7.715 | -8.197  | 1.00 | 0.00 |
| ATOM | 727 | ND1 | HID | 47 | -9.953  | 7.415 | -9.136  | 1.00 | 0.00 |
| ATOM | 728 | HD1 | HID | 47 | -10.676 | 6.717 | -9.039  | 1.00 | 0.00 |
| ATOM | 729 | CE1 | HID | 47 | -9.768  | 8.219 | -10.200 | 1.00 | 0.00 |
| ATOM | 730 | HE1 | HID | 47 | -10.450 | 8.173 | -11.050 | 1.00 | 0.00 |
| ATOM | 731 | NE2 | HID | 47 | -8.674  | 8.991 | -9.978  | 1.00 | 0.00 |
| ATOM | 732 | CD2 | HID | 47 | -8.164  | 8.692 | -8.723  | 1.00 | 0.00 |
| ATOM | 733 | HD2 | HID | 47 | -7.281  | 9.215 | -8.355  | 1.00 | 0.00 |
| ATOM | 734 | C   | HID | 47 | -9.868  | 5.410 | -5.253  | 1.00 | 0.00 |
| ATOM | 735 | O   | HID | 47 | -9.645  | 5.965 | -4.187  | 1.00 | 0.00 |
| ATOM | 736 | N   | LYS | 48 | -9.852  | 4.089 | -5.453  | 1.00 | 0.00 |
| ATOM | 737 | H   | LYS | 48 | -10.033 | 3.753 | -6.388  | 1.00 | 0.00 |
| ATOM | 738 | CA  | LYS | 48 | -9.645  | 3.110 | -4.394  | 1.00 | 0.00 |
| ATOM | 739 | HA  | LYS | 48 | -8.612  | 3.149 | -4.047  | 1.00 | 0.00 |
| ATOM | 740 | CB  | LYS | 48 | -10.570 | 3.411 | -3.212  | 1.00 | 0.00 |
| ATOM | 741 | HB2 | LYS | 48 | -11.146 | 4.310 | -3.434  | 1.00 | 0.00 |
| ATOM | 742 | HB3 | LYS | 48 | -11.249 | 2.570 | -3.072  | 1.00 | 0.00 |
| ATOM | 743 | CG  | LYS | 48 | -9.755  | 3.630 | -1.931  | 1.00 | 0.00 |
| ATOM | 744 | HG2 | LYS | 48 | -9.104  | 2.769 | -1.781  | 1.00 | 0.00 |
| ATOM | 745 | HG3 | LYS | 48 | -9.147  | 4.527 | -2.055  | 1.00 | 0.00 |
| ATOM | 746 | CD  | LYS | 48 | -10.671 | 3.797 | -0.712  | 1.00 | 0.00 |

|      |     |     |     |    |         |        |        |      |      |
|------|-----|-----|-----|----|---------|--------|--------|------|------|
| ATOM | 747 | HD2 | LYS | 48 | -10.083 | 4.187  | 0.119  | 1.00 | 0.00 |
| ATOM | 748 | HD3 | LYS | 48 | -11.462 | 4.505  | -0.961 | 1.00 | 0.00 |
| ATOM | 749 | CE  | LYS | 48 | -11.295 | 2.451  | -0.311 | 1.00 | 0.00 |
| ATOM | 750 | HE2 | LYS | 48 | -10.557 | 1.663  | -0.463 | 1.00 | 0.00 |
| ATOM | 751 | HE3 | LYS | 48 | -11.571 | 2.492  | 0.742  | 1.00 | 0.00 |
| ATOM | 752 | NZ  | LYS | 48 | -12.502 | 2.163  | -1.128 | 1.00 | 0.00 |
| ATOM | 753 | HZ1 | LYS | 48 | -12.246 | 2.125  | -2.105 | 1.00 | 0.00 |
| ATOM | 754 | HZ2 | LYS | 48 | -12.894 | 1.276  | -0.848 | 1.00 | 0.00 |
| ATOM | 755 | HZ3 | LYS | 48 | -13.186 | 2.893  | -0.988 | 1.00 | 0.00 |
| ATOM | 756 | C   | LYS | 48 | -9.877  | 1.700  | -4.909 | 1.00 | 0.00 |
| ATOM | 757 | O   | LYS | 48 | -9.168  | 0.777  | -4.548 | 1.00 | 0.00 |
| ATOM | 758 | N   | GLN | 49 | -10.797 | 1.564  | -5.859 | 1.00 | 0.00 |
| ATOM | 759 | H   | GLN | 49 | -11.313 | 2.373  | -6.178 | 1.00 | 0.00 |
| ATOM | 760 | CA  | GLN | 49 | -11.077 | 0.294  | -6.469 | 1.00 | 0.00 |
| ATOM | 761 | HA  | GLN | 49 | -10.873 | -0.502 | -5.754 | 1.00 | 0.00 |
| ATOM | 762 | CB  | GLN | 49 | -12.531 | 0.195  | -6.906 | 1.00 | 0.00 |
| ATOM | 763 | HB2 | GLN | 49 | -12.986 | 1.186  | -6.881 | 1.00 | 0.00 |
| ATOM | 764 | HB3 | GLN | 49 | -12.579 | -0.200 | -7.921 | 1.00 | 0.00 |
| ATOM | 765 | CG  | GLN | 49 | -13.287 | -0.736 | -5.961 | 1.00 | 0.00 |
| ATOM | 766 | HG2 | GLN | 49 | -12.804 | -1.712 | -5.991 | 1.00 | 0.00 |
| ATOM | 767 | HG3 | GLN | 49 | -13.250 | -0.343 | -4.945 | 1.00 | 0.00 |
| ATOM | 768 | CD  | GLN | 49 | -14.743 | -0.901 | -6.365 | 1.00 | 0.00 |

|      |     |      |     |    |         |        |         |      |      |
|------|-----|------|-----|----|---------|--------|---------|------|------|
| ATOM | 769 | OE1  | GLN | 49 | -15.183 | -0.490 | -7.419  | 1.00 | 0.00 |
| ATOM | 770 | NE2  | GLN | 49 | -15.525 | -1.499 | -5.497  | 1.00 | 0.00 |
| ATOM | 771 | HE21 | GLN | 49 | -16.502 | -1.635 | -5.713  | 1.00 | 0.00 |
| ATOM | 772 | HE22 | GLN | 49 | -15.146 | -1.819 | -4.618  | 1.00 | 0.00 |
| ATOM | 773 | C    | GLN | 49 | -10.214 | 0.136  | -7.682  | 1.00 | 0.00 |
| ATOM | 774 | O    | GLN | 49 | -9.864  | -0.976 | -7.936  | 1.00 | 0.00 |
| ATOM | 775 | N    | LEU | 50 | -9.746  | 1.186  | -8.350  | 1.00 | 0.00 |
| ATOM | 776 | H    | LEU | 50 | -10.064 | 2.102  | -8.067  | 1.00 | 0.00 |
| ATOM | 777 | CA   | LEU | 50 | -8.851  | 1.091  | -9.491  | 1.00 | 0.00 |
| ATOM | 778 | HA   | LEU | 50 | -9.265  | 0.433  | -10.255 | 1.00 | 0.00 |
| ATOM | 779 | CB   | LEU | 50 | -8.680  | 2.496  | -10.093 | 1.00 | 0.00 |
| ATOM | 780 | HB2  | LEU | 50 | -8.793  | 3.189  | -9.259  | 1.00 | 0.00 |
| ATOM | 781 | HB3  | LEU | 50 | -7.678  | 2.594  | -10.513 | 1.00 | 0.00 |
| ATOM | 782 | CG   | LEU | 50 | -9.723  | 2.823  | -11.176 | 1.00 | 0.00 |
| ATOM | 783 | HG   | LEU | 50 | -10.662 | 2.323  | -10.939 | 1.00 | 0.00 |
| ATOM | 784 | CD1  | LEU | 50 | -9.951  | 4.338  | -11.229 | 1.00 | 0.00 |
| ATOM | 785 | HD11 | LEU | 50 | -9.013  | 4.839  | -11.467 | 1.00 | 0.00 |
| ATOM | 786 | HD12 | LEU | 50 | -10.690 | 4.569  | -11.997 | 1.00 | 0.00 |
| ATOM | 787 | HD13 | LEU | 50 | -10.313 | 4.686  | -10.262 | 1.00 | 0.00 |
| ATOM | 788 | CD2  | LEU | 50 | -9.273  | 2.294  | -12.540 | 1.00 | 0.00 |
| ATOM | 789 | HD21 | LEU | 50 | -9.148  | 1.213  | -12.488 | 1.00 | 0.00 |
| ATOM | 790 | HD22 | LEU | 50 | -10.025 | 2.537  | -13.291 | 1.00 | 0.00 |

|      |     |      |     |    |        |        |         |      |      |
|------|-----|------|-----|----|--------|--------|---------|------|------|
| ATOM | 791 | HD23 | LEU | 50 | -8.325 | 2.756  | -12.815 | 1.00 | 0.00 |
| ATOM | 792 | C    | LEU | 50 | -7.512 | 0.491  | -9.059  | 1.00 | 0.00 |
| ATOM | 793 | O    | LEU | 50 | -6.828 | -0.103 | -9.871  | 1.00 | 0.00 |
| ATOM | 794 | N    | CYX | 51 | -7.173 | 0.594  | -7.771  | 1.00 | 0.00 |
| ATOM | 795 | H    | CYX | 51 | -7.748 | 1.155  | -7.159  | 1.00 | 0.00 |
| ATOM | 796 | CA   | CYX | 51 | -5.986 | -0.016 | -7.226  | 1.00 | 0.00 |
| ATOM | 797 | HA   | CYX | 51 | -5.213 | -0.077 | -7.992  | 1.00 | 0.00 |
| ATOM | 798 | CB   | CYX | 51 | -5.460 | 0.811  | -6.073  | 1.00 | 0.00 |
| ATOM | 799 | HB2  | CYX | 51 | -4.374 | 0.730  | -6.033  | 1.00 | 0.00 |
| ATOM | 800 | HB3  | CYX | 51 | -5.740 | 1.855  | -6.217  | 1.00 | 0.00 |
| ATOM | 801 | SG   | CYX | 51 | -6.016 | 0.428  | -4.381  | 1.00 | 0.00 |
| ATOM | 802 | C    | CYX | 51 | -6.279 | -1.424 | -6.788  | 1.00 | 0.00 |
| ATOM | 803 | O    | CYX | 51 | -5.571 | -2.303 | -7.235  | 1.00 | 0.00 |
| ATOM | 804 | N    | CYX | 52 | -7.385 | -1.647 | -6.066  | 1.00 | 0.00 |
| ATOM | 805 | H    | CYX | 52 | -7.921 | -0.854 | -5.743  | 1.00 | 0.00 |
| ATOM | 806 | CA   | CYX | 52 | -7.794 | -2.976 | -5.642  | 1.00 | 0.00 |
| ATOM | 807 | HA   | CYX | 52 | -6.933 | -3.526 | -5.262  | 1.00 | 0.00 |
| ATOM | 808 | CB   | CYX | 52 | -8.845 | -2.877 | -4.528  | 1.00 | 0.00 |
| ATOM | 809 | HB2  | CYX | 52 | -9.435 | -1.970 | -4.664  | 1.00 | 0.00 |
| ATOM | 810 | HB3  | CYX | 52 | -9.501 | -3.746 | -4.569  | 1.00 | 0.00 |
| ATOM | 811 | SG   | CYX | 52 | -8.097 | -2.860 | -2.867  | 1.00 | 0.00 |
| ATOM | 812 | C    | CYX | 52 | -8.290 | -3.787 | -6.844  | 1.00 | 0.00 |

|      |     |     |     |    |         |        |         |      |      |
|------|-----|-----|-----|----|---------|--------|---------|------|------|
| ATOM | 813 | O   | CYX | 52 | -8.624  | -4.954 | -6.702  | 1.00 | 0.00 |
| ATOM | 814 | N   | MET | 53 | -8.349  | -3.174 | -8.025  | 1.00 | 0.00 |
| ATOM | 815 | H   | MET | 53 | -8.026  | -2.217 | -8.061  | 1.00 | 0.00 |
| ATOM | 816 | CA  | MET | 53 | -8.850  | -3.770 | -9.234  | 1.00 | 0.00 |
| ATOM | 817 | HA  | MET | 53 | -9.508  | -4.601 | -8.984  | 1.00 | 0.00 |
| ATOM | 818 | CB  | MET | 53 | -9.640  | -2.754 | -10.066 | 1.00 | 0.00 |
| ATOM | 819 | HB2 | MET | 53 | -10.601 | -2.581 | -9.582  | 1.00 | 0.00 |
| ATOM | 820 | HB3 | MET | 53 | -9.077  | -1.820 | -10.099 | 1.00 | 0.00 |
| ATOM | 821 | CG  | MET | 53 | -9.870  | -3.255 | -11.481 | 1.00 | 0.00 |
| ATOM | 822 | HG2 | MET | 53 | -9.631  | -4.317 | -11.529 | 1.00 | 0.00 |
| ATOM | 823 | HG3 | MET | 53 | -10.916 | -3.105 | -11.749 | 1.00 | 0.00 |
| ATOM | 824 | SD  | MET | 53 | -8.824  | -2.359 | -12.651 | 1.00 | 0.00 |
| ATOM | 825 | CE  | MET | 53 | -8.500  | -3.699 | -13.816 | 1.00 | 0.00 |
| ATOM | 826 | HE1 | MET | 53 | -9.442  | -4.054 | -14.233 | 1.00 | 0.00 |
| ATOM | 827 | HE2 | MET | 53 | -7.861  | -3.334 | -14.621 | 1.00 | 0.00 |
| ATOM | 828 | HE3 | MET | 53 | -8.000  | -4.518 | -13.299 | 1.00 | 0.00 |
| ATOM | 829 | C   | MET | 53 | -7.660  | -4.275 | -10.013 | 1.00 | 0.00 |
| ATOM | 830 | O   | MET | 53 | -7.648  | -5.429 | -10.407 | 1.00 | 0.00 |
| ATOM | 831 | N   | GLN | 54 | -6.697  | -3.399 | -10.291 | 1.00 | 0.00 |
| ATOM | 832 | H   | GLN | 54 | -6.753  | -2.445 | -9.963  | 1.00 | 0.00 |
| ATOM | 833 | CA  | GLN | 54 | -5.538  | -3.791 | -11.063 | 1.00 | 0.00 |
| ATOM | 834 | HA  | GLN | 54 | -5.854  | -4.329 | -11.957 | 1.00 | 0.00 |

|      |     |      |     |    |        |        |         |      |      |
|------|-----|------|-----|----|--------|--------|---------|------|------|
| ATOM | 835 | CB   | GLN | 54 | -4.748 | -2.574 | -11.487 | 1.00 | 0.00 |
| ATOM | 836 | HB2  | GLN | 54 | -4.835 | -1.823 | -10.702 | 1.00 | 0.00 |
| ATOM | 837 | HB3  | GLN | 54 | -3.704 | -2.868 | -11.593 | 1.00 | 0.00 |
| ATOM | 838 | CG   | GLN | 54 | -5.244 | -1.994 | -12.797 | 1.00 | 0.00 |
| ATOM | 839 | HG2  | GLN | 54 | -4.496 | -2.181 | -13.568 | 1.00 | 0.00 |
| ATOM | 840 | HG3  | GLN | 54 | -6.169 | -2.509 | -13.056 | 1.00 | 0.00 |
| ATOM | 841 | CD   | GLN | 54 | -5.520 | -0.499 | -12.741 | 1.00 | 0.00 |
| ATOM | 842 | OE1  | GLN | 54 | -4.828 | 0.312  | -12.166 | 1.00 | 0.00 |
| ATOM | 843 | NE2  | GLN | 54 | -6.572 | -0.055 | -13.370 | 1.00 | 0.00 |
| ATOM | 844 | HE21 | GLN | 54 | -6.787 | 0.932  | -13.355 | 1.00 | 0.00 |
| ATOM | 845 | HE22 | GLN | 54 | -7.167 | -0.699 | -13.870 | 1.00 | 0.00 |
| ATOM | 846 | C    | GLN | 54 | -4.637 | -4.673 | -10.238 | 1.00 | 0.00 |
| ATOM | 847 | O    | GLN | 54 | -4.023 | -5.555 | -10.807 | 1.00 | 0.00 |
| ATOM | 848 | N    | LEU | 55 | -4.593 | -4.499 | -8.915  | 1.00 | 0.00 |
| ATOM | 849 | H    | LEU | 55 | -5.147 | -3.769 | -8.490  | 1.00 | 0.00 |
| ATOM | 850 | CA   | LEU | 55 | -3.759 | -5.322 | -8.055  | 1.00 | 0.00 |
| ATOM | 851 | HA   | LEU | 55 | -2.705 | -5.189 | -8.302  | 1.00 | 0.00 |
| ATOM | 852 | CB   | LEU | 55 | -3.976 | -4.902 | -6.611  | 1.00 | 0.00 |
| ATOM | 853 | HB2  | LEU | 55 | -4.949 | -4.413 | -6.650  | 1.00 | 0.00 |
| ATOM | 854 | HB3  | LEU | 55 | -4.037 | -5.782 | -5.971  | 1.00 | 0.00 |
| ATOM | 855 | CG   | LEU | 55 | -2.930 | -3.921 | -6.038  | 1.00 | 0.00 |
| ATOM | 856 | HG   | LEU | 55 | -2.380 | -3.496 | -6.879  | 1.00 | 0.00 |

|      |     |          |    |        |         |         |      |      |
|------|-----|----------|----|--------|---------|---------|------|------|
| ATOM | 857 | CD1 LEU  | 55 | -3.555 | -2.786  | -5.209  | 1.00 | 0.00 |
| ATOM | 858 | HD11 LEU | 55 | -4.104 | -3.209  | -4.369  | 1.00 | 0.00 |
| ATOM | 859 | HD12 LEU | 55 | -2.767 | -2.132  | -4.836  | 1.00 | 0.00 |
| ATOM | 860 | HD13 LEU | 55 | -4.237 | -2.211  | -5.836  | 1.00 | 0.00 |
| ATOM | 861 | CD2 LEU  | 55 | -1.872 | -4.664  | -5.217  | 1.00 | 0.00 |
| ATOM | 862 | HD21 LEU | 55 | -1.361 | -5.387  | -5.852  | 1.00 | 0.00 |
| ATOM | 863 | HD22 LEU | 55 | -1.148 | -3.949  | -4.826  | 1.00 | 0.00 |
| ATOM | 864 | HD23 LEU | 55 | -2.353 | -5.184  | -4.389  | 1.00 | 0.00 |
| ATOM | 865 | C LEU    | 55 | -4.134 | -6.784  | -8.241  | 1.00 | 0.00 |
| ATOM | 866 | O LEU    | 55 | -3.285 | -7.640  | -8.095  | 1.00 | 0.00 |
| ATOM | 867 | N LYS    | 56 | -5.383 | -7.062  | -8.616  | 1.00 | 0.00 |
| ATOM | 868 | H LYS    | 56 | -6.089 | -6.340  | -8.577  | 1.00 | 0.00 |
| ATOM | 869 | CA LYS   | 56 | -5.791 | -8.400  | -8.978  | 1.00 | 0.00 |
| ATOM | 870 | HA LYS   | 56 | -5.473 | -9.117  | -8.222  | 1.00 | 0.00 |
| ATOM | 871 | CB LYS   | 56 | -7.314 | -8.437  | -9.076  | 1.00 | 0.00 |
| ATOM | 872 | HB2 LYS  | 56 | -7.736 | -8.189  | -8.103  | 1.00 | 0.00 |
| ATOM | 873 | HB3 LYS  | 56 | -7.638 | -7.699  | -9.811  | 1.00 | 0.00 |
| ATOM | 874 | CG LYS   | 56 | -7.796 | -9.827  | -9.502  | 1.00 | 0.00 |
| ATOM | 875 | HG2 LYS  | 56 | -8.099 | -9.789  | -10.549 | 1.00 | 0.00 |
| ATOM | 876 | HG3 LYS  | 56 | -6.975 | -10.535 | -9.387  | 1.00 | 0.00 |
| ATOM | 877 | CD LYS   | 56 | -8.980 | -10.276 | -8.645  | 1.00 | 0.00 |
| ATOM | 878 | HD2 LYS  | 56 | -8.604 | -10.741 | -7.735  | 1.00 | 0.00 |

|      |     |          |    |         |         |         |      |      |
|------|-----|----------|----|---------|---------|---------|------|------|
| ATOM | 879 | HD3 LYS  | 56 | -9.582  | -9.405  | -8.386  | 1.00 | 0.00 |
| ATOM | 880 | CE LYS   | 56 | -9.843  | -11.282 | -9.414  | 1.00 | 0.00 |
| ATOM | 881 | HE2 LYS  | 56 | -9.796  | -11.054 | -10.479 | 1.00 | 0.00 |
| ATOM | 882 | HE3 LYS  | 56 | -9.461  | -12.288 | -9.241  | 1.00 | 0.00 |
| ATOM | 883 | NZ LYS   | 56 | -11.250 | -11.202 | -8.954  | 1.00 | 0.00 |
| ATOM | 884 | HZ1 LYS  | 56 | -11.604 | -10.270 | -9.115  | 1.00 | 0.00 |
| ATOM | 885 | HZ2 LYS  | 56 | -11.810 | -11.868 | -9.467  | 1.00 | 0.00 |
| ATOM | 886 | HZ3 LYS  | 56 | -11.294 | -11.413 | -7.968  | 1.00 | 0.00 |
| ATOM | 887 | C LYS    | 56 | -5.113  | -8.889  | -10.255 | 1.00 | 0.00 |
| ATOM | 888 | O LYS    | 56 | -4.727  | -10.044 | -10.307 | 1.00 | 0.00 |
| ATOM | 889 | N ASN    | 57 | -5.077  | -8.052  | -11.292 | 1.00 | 0.00 |
| ATOM | 890 | H ASN    | 57 | -5.601  | -7.189  | -11.261 | 1.00 | 0.00 |
| ATOM | 891 | CA ASN   | 57 | -4.333  | -8.360  | -12.496 | 1.00 | 0.00 |
| ATOM | 892 | HA ASN   | 57 | -4.766  | -9.232  | -12.985 | 1.00 | 0.00 |
| ATOM | 893 | CB ASN   | 57 | -4.379  | -7.172  | -13.478 | 1.00 | 0.00 |
| ATOM | 894 | HB2 ASN  | 57 | -4.683  | -6.252  | -12.979 | 1.00 | 0.00 |
| ATOM | 895 | HB3 ASN  | 57 | -3.362  | -7.061  | -13.854 | 1.00 | 0.00 |
| ATOM | 896 | CG ASN   | 57 | -5.302  | -7.413  | -14.648 | 1.00 | 0.00 |
| ATOM | 897 | OD1 ASN  | 57 | -5.715  | -8.510  | -14.974 | 1.00 | 0.00 |
| ATOM | 898 | ND2 ASN  | 57 | -5.718  | -6.342  | -15.284 | 1.00 | 0.00 |
| ATOM | 899 | HD21 ASN | 57 | -6.338  | -6.437  | -16.076 | 1.00 | 0.00 |
| ATOM | 900 | HD22 ASN | 57 | -5.416  | -5.427  | -14.979 | 1.00 | 0.00 |



|      |     |      |     |    |        |         |         |      |      |
|------|-----|------|-----|----|--------|---------|---------|------|------|
| ATOM | 901 | C    | ASN | 57 | -2.870 | -8.709  | -12.221 | 1.00 | 0.00 |
| ATOM | 902 | O    | ASN | 57 | -2.269 | -9.403  | -13.033 | 1.00 | 0.00 |
| ATOM | 903 | N    | LEU | 58 | -2.293 | -8.096  | -11.181 | 1.00 | 0.00 |
| ATOM | 904 | H    | LEU | 58 | -2.774 | -7.337  | -10.719 | 1.00 | 0.00 |
| ATOM | 905 | CA   | LEU | 58 | -0.943 | -8.399  | -10.772 | 1.00 | 0.00 |
| ATOM | 906 | HA   | LEU | 58 | -0.266 | -8.342  | -11.625 | 1.00 | 0.00 |
| ATOM | 907 | CB   | LEU | 58 | -0.489 | -7.377  | -9.716  | 1.00 | 0.00 |
| ATOM | 908 | HB2  | LEU | 58 | -1.380 | -7.116  | -9.145  | 1.00 | 0.00 |
| ATOM | 909 | HB3  | LEU | 58 | 0.229  | -7.873  | -9.063  | 1.00 | 0.00 |
| ATOM | 910 | CG   | LEU | 58 | 0.134  | -6.115  | -10.285 | 1.00 | 0.00 |
| ATOM | 911 | HG   | LEU | 58 | -0.620 | -5.566  | -10.850 | 1.00 | 0.00 |
| ATOM | 912 | CD1  | LEU | 58 | 0.665  | -5.231  | -9.150  | 1.00 | 0.00 |
| ATOM | 913 | HD11 | LEU | 58 | 1.420  | -5.778  | -8.585  | 1.00 | 0.00 |
| ATOM | 914 | HD12 | LEU | 58 | 1.110  | -4.328  | -9.570  | 1.00 | 0.00 |
| ATOM | 915 | HD13 | LEU | 58 | -0.156 | -4.956  | -8.488  | 1.00 | 0.00 |
| ATOM | 916 | CD2  | LEU | 58 | 1.258  | -6.460  | -11.217 | 1.00 | 0.00 |
| ATOM | 917 | HD21 | LEU | 58 | 0.877  | -7.068  | -12.038 | 1.00 | 0.00 |
| ATOM | 918 | HD22 | LEU | 58 | 1.694  | -5.544  | -11.617 | 1.00 | 0.00 |
| ATOM | 919 | HD23 | LEU | 58 | 2.021  | -7.018  | -10.676 | 1.00 | 0.00 |
| ATOM | 920 | C    | LEU | 58 | -0.809 | -9.853  | -10.300 | 1.00 | 0.00 |
| ATOM | 921 | O    | LEU | 58 | -1.719 | -10.672 | -10.396 | 1.00 | 0.00 |
| ATOM | 922 | N    | ASP | 59 | 0.366  | -10.183 | -9.787  | 1.00 | 0.00 |

|      |     |     |     |    |        |         |         |      |      |
|------|-----|-----|-----|----|--------|---------|---------|------|------|
| ATOM | 923 | H   | ASP | 59 | 1.112  | -9.503  | -9.736  | 1.00 | 0.00 |
| ATOM | 924 | CA  | ASP | 59 | 0.618  | -11.514 | -9.291  | 1.00 | 0.00 |
| ATOM | 925 | HA  | ASP | 59 | -0.059 | -12.222 | -9.767  | 1.00 | 0.00 |
| ATOM | 926 | CB  | ASP | 59 | 2.053  | -11.928 | -9.601  | 1.00 | 0.00 |
| ATOM | 927 | HB2 | ASP | 59 | 2.594  | -11.167 | -9.039  | 1.00 | 0.00 |
| ATOM | 928 | HB3 | ASP | 59 | 2.334  | -12.916 | -9.238  | 1.00 | 0.00 |
| ATOM | 929 | CG  | ASP | 59 | 2.404  | -11.812 | -11.081 | 1.00 | 0.00 |
| ATOM | 930 | OD1 | ASP | 59 | 1.643  | -12.360 | -11.897 | 1.00 | 0.00 |
| ATOM | 931 | OD2 | ASP | 59 | 3.527  | -11.332 | -11.340 | 1.00 | 0.00 |
| ATOM | 932 | C   | ASP | 59 | 0.404  | -11.541 | -7.791  | 1.00 | 0.00 |
| ATOM | 933 | O   | ASP | 59 | 0.734  | -10.577 | -7.097  | 1.00 | 0.00 |
| ATOM | 934 | N   | GLU | 60 | 0.162  | -12.732 | -7.248  | 1.00 | 0.00 |
| ATOM | 935 | H   | GLU | 60 | 0.093  | -13.548 | -7.839  | 1.00 | 0.00 |
| ATOM | 936 | CA  | GLU | 60 | -0.036 | -12.899 | -5.808  | 1.00 | 0.00 |
| ATOM | 937 | HA  | GLU | 60 | -0.699 | -12.119 | -5.434  | 1.00 | 0.00 |
| ATOM | 938 | CB  | GLU | 60 | -0.666 | -14.265 | -5.507  | 1.00 | 0.00 |
| ATOM | 939 | HB2 | GLU | 60 | -1.019 | -14.708 | -6.438  | 1.00 | 0.00 |
| ATOM | 940 | HB3 | GLU | 60 | 0.086  | -14.914 | -5.058  | 1.00 | 0.00 |
| ATOM | 941 | CG  | GLU | 60 | -1.845 | -14.102 | -4.539  | 1.00 | 0.00 |
| ATOM | 942 | HG2 | GLU | 60 | -1.563 | -13.331 | -3.821  | 1.00 | 0.00 |
| ATOM | 943 | HG3 | GLU | 60 | -2.740 | -13.787 | -5.076  | 1.00 | 0.00 |
| ATOM | 944 | CD  | GLU | 60 | -2.128 | -15.413 | -3.797  | 1.00 | 0.00 |

|      |     |     |     |    |        |         |        |      |      |
|------|-----|-----|-----|----|--------|---------|--------|------|------|
| ATOM | 945 | OE1 | GLU | 60 | -1.515 | -15.605 | -2.722 | 1.00 | 0.00 |
| ATOM | 946 | OE2 | GLU | 60 | -2.917 | -16.218 | -4.336 | 1.00 | 0.00 |
| ATOM | 947 | C   | GLU | 60 | 1.298  | -12.780 | -5.071 | 1.00 | 0.00 |
| ATOM | 948 | O   | GLU | 60 | 1.361  | -12.435 | -3.896 | 1.00 | 0.00 |
| ATOM | 949 | N   | LYS | 61 | 2.398  | -13.025 | -5.791 | 1.00 | 0.00 |
| ATOM | 950 | H   | LYS | 61 | 2.304  | -13.402 | -6.723 | 1.00 | 0.00 |
| ATOM | 951 | CA  | LYS | 61 | 3.723  | -12.856 | -5.253 | 1.00 | 0.00 |
| ATOM | 952 | HA  | LYS | 61 | 3.712  | -12.974 | -4.170 | 1.00 | 0.00 |
| ATOM | 953 | CB  | LYS | 61 | 4.649  | -13.916 | -5.851 | 1.00 | 0.00 |
| ATOM | 954 | HB2 | LYS | 61 | 5.555  | -13.957 | -5.246 | 1.00 | 0.00 |
| ATOM | 955 | HB3 | LYS | 61 | 4.139  | -14.878 | -5.807 | 1.00 | 0.00 |
| ATOM | 956 | CG  | LYS | 61 | 5.021  | -13.601 | -7.306 | 1.00 | 0.00 |
| ATOM | 957 | HG2 | LYS | 61 | 4.109  | -13.392 | -7.866 | 1.00 | 0.00 |
| ATOM | 958 | HG3 | LYS | 61 | 5.666  | -12.722 | -7.323 | 1.00 | 0.00 |
| ATOM | 959 | CD  | LYS | 61 | 5.754  | -14.783 | -7.948 | 1.00 | 0.00 |
| ATOM | 960 | HD2 | LYS | 61 | 6.682  | -14.424 | -8.394 | 1.00 | 0.00 |
| ATOM | 961 | HD3 | LYS | 61 | 5.982  | -15.519 | -7.178 | 1.00 | 0.00 |
| ATOM | 962 | CE  | LYS | 61 | 4.883  | -15.431 | -9.032 | 1.00 | 0.00 |
| ATOM | 963 | HE2 | LYS | 61 | 4.226  | -14.672 | -9.458 | 1.00 | 0.00 |
| ATOM | 964 | HE3 | LYS | 61 | 5.530  | -15.830 | -9.814 | 1.00 | 0.00 |
| ATOM | 965 | NZ  | LYS | 61 | 4.065  | -16.528 | -8.458 | 1.00 | 0.00 |
| ATOM | 966 | HZ1 | LYS | 61 | 3.466  | -16.157 | -7.735 | 1.00 | 0.00 |

|      |     |     |     |    |        |         |        |      |      |
|------|-----|-----|-----|----|--------|---------|--------|------|------|
| ATOM | 967 | HZ2 | LYS | 61 | 3.499  | -16.941 | -9.186 | 1.00 | 0.00 |
| ATOM | 968 | HZ3 | LYS | 61 | 4.674  | -17.231 | -8.064 | 1.00 | 0.00 |
| ATOM | 969 | C   | LYS | 61 | 4.210  | -11.452 | -5.501 | 1.00 | 0.00 |
| ATOM | 970 | O   | LYS | 61 | 5.276  | -11.159 | -5.015 | 1.00 | 0.00 |
| ATOM | 971 | N   | CYX | 62 | 3.528  | -10.638 | -6.300 | 1.00 | 0.00 |
| ATOM | 972 | H   | CYX | 62 | 2.744  | -11.032 | -6.800 | 1.00 | 0.00 |
| ATOM | 973 | CA  | CYX | 62 | 3.860  | -9.251  | -6.532 | 1.00 | 0.00 |
| ATOM | 974 | HA  | CYX | 62 | 4.889  | -9.049  | -6.236 | 1.00 | 0.00 |
| ATOM | 975 | CB  | CYX | 62 | 3.714  | -8.949  | -8.009 | 1.00 | 0.00 |
| ATOM | 976 | HB2 | CYX | 62 | 2.763  | -9.342  | -8.369 | 1.00 | 0.00 |
| ATOM | 977 | HB3 | CYX | 62 | 3.743  | -7.870  | -8.165 | 1.00 | 0.00 |
| ATOM | 978 | SG  | CYX | 62 | 5.008  | -9.697  | -9.036 | 1.00 | 0.00 |
| ATOM | 979 | C   | CYX | 62 | 2.951  | -8.357  | -5.686 | 1.00 | 0.00 |
| ATOM | 980 | O   | CYX | 62 | 3.263  | -7.205  | -5.413 | 1.00 | 0.00 |
| ATOM | 981 | N   | MET | 63 | 1.897  | -8.895  | -5.107 | 1.00 | 0.00 |
| ATOM | 982 | H   | MET | 63 | 1.702  | -9.874  | -5.260 | 1.00 | 0.00 |
| ATOM | 983 | CA  | MET | 63 | 0.986  | -8.137  | -4.294 | 1.00 | 0.00 |
| ATOM | 984 | HA  | MET | 63 | 0.895  | -7.116  | -4.665 | 1.00 | 0.00 |
| ATOM | 985 | CB  | MET | 63 | -0.372 | -8.796  | -4.354 | 1.00 | 0.00 |
| ATOM | 986 | HB2 | MET | 63 | -0.230 | -9.868  | -4.218 | 1.00 | 0.00 |
| ATOM | 987 | HB3 | MET | 63 | -0.971 | -8.402  | -3.534 | 1.00 | 0.00 |
| ATOM | 988 | CG  | MET | 63 | -1.088 | -8.544  | -5.669 | 1.00 | 0.00 |

|      |      |         |    |        |         |        |      |      |
|------|------|---------|----|--------|---------|--------|------|------|
| ATOM | 989  | HG2 MET | 63 | -1.731 | -7.673  | -5.543 | 1.00 | 0.00 |
| ATOM | 990  | HG3 MET | 63 | -0.336 | -8.332  | -6.430 | 1.00 | 0.00 |
| ATOM | 991  | SD MET  | 63 | -2.088 | -9.949  | -6.199 | 1.00 | 0.00 |
| ATOM | 992  | CE MET  | 63 | -2.946 | -10.327 | -4.668 | 1.00 | 0.00 |
| ATOM | 993  | HE1 MET | 63 | -3.531 | -9.462  | -4.356 | 1.00 | 0.00 |
| ATOM | 994  | HE2 MET | 63 | -3.610 | -11.177 | -4.824 | 1.00 | 0.00 |
| ATOM | 995  | HE3 MET | 63 | -2.218 | -10.571 | -3.894 | 1.00 | 0.00 |
| ATOM | 996  | C MET   | 63 | 1.522  | -8.085  | -2.888 | 1.00 | 0.00 |
| ATOM | 997  | O MET   | 63 | 0.944  | -8.595  | -1.971 | 1.00 | 0.00 |
| ATOM | 998  | N CYX   | 64 | 2.666  | -7.498  | -2.645 | 1.00 | 0.00 |
| ATOM | 999  | H CYX   | 64 | 3.163  | -7.115  | -3.438 | 1.00 | 0.00 |
| ATOM | 1000 | CA CYX  | 64 | 3.296  | -7.425  | -1.335 | 1.00 | 0.00 |
| ATOM | 1001 | HA CYX  | 64 | 2.722  | -6.733  | -0.719 | 1.00 | 0.00 |
| ATOM | 1002 | CB CYX  | 64 | 3.372  | -8.784  | -0.611 | 1.00 | 0.00 |
| ATOM | 1003 | HB2 CYX | 64 | 2.555  | -8.860  | 0.106  | 1.00 | 0.00 |
| ATOM | 1004 | HB3 CYX | 64 | 3.290  | -9.589  | -1.341 | 1.00 | 0.00 |
| ATOM | 1005 | SG CYX  | 64 | 4.914  | -9.098  | 0.341  | 1.00 | 0.00 |
| ATOM | 1006 | C CYX   | 64 | 4.670  | -6.830  | -1.518 | 1.00 | 0.00 |
| ATOM | 1007 | O CYX   | 64 | 4.932  | -5.754  | -0.979 | 1.00 | 0.00 |
| ATOM | 1008 | N PRO   | 65 | 5.521  | -7.496  | -2.320 | 1.00 | 0.00 |
| ATOM | 1009 | CD PRO  | 65 | 5.262  | -8.745  | -3.024 | 1.00 | 0.00 |
| ATOM | 1010 | HD2 PRO | 65 | 4.523  | -8.538  | -3.798 | 1.00 | 0.00 |

|      |      |         |    |       |         |        |      |      |
|------|------|---------|----|-------|---------|--------|------|------|
| ATOM | 1011 | HD3 PRO | 65 | 4.846 | -9.448  | -2.303 | 1.00 | 0.00 |
| ATOM | 1012 | CG PRO  | 65 | 6.583 | -9.215  | -3.593 | 1.00 | 0.00 |
| ATOM | 1013 | HG2 PRO | 65 | 6.515 | -9.226  | -4.681 | 1.00 | 0.00 |
| ATOM | 1014 | HG3 PRO | 65 | 6.784 | -10.223 | -3.232 | 1.00 | 0.00 |
| ATOM | 1015 | CB PRO  | 65 | 7.645 | -8.249  | -3.116 | 1.00 | 0.00 |
| ATOM | 1016 | HB2 PRO | 65 | 8.246 | -7.943  | -3.973 | 1.00 | 0.00 |
| ATOM | 1017 | HB3 PRO | 65 | 8.295 | -8.666  | -2.347 | 1.00 | 0.00 |
| ATOM | 1018 | CA PRO  | 65 | 6.881 | -7.040  | -2.557 | 1.00 | 0.00 |
| ATOM | 1019 | HA PRO  | 65 | 7.317 | -6.720  | -1.611 | 1.00 | 0.00 |
| ATOM | 1020 | C PRO   | 65 | 6.892 | -5.875  | -3.540 | 1.00 | 0.00 |
| ATOM | 1021 | O PRO   | 65 | 7.697 | -4.965  | -3.400 | 1.00 | 0.00 |
| ATOM | 1022 | N ALA   | 66 | 5.980 | -5.893  | -4.512 | 1.00 | 0.00 |
| ATOM | 1023 | H ALA   | 66 | 5.355 | -6.682  | -4.593 | 1.00 | 0.00 |
| ATOM | 1024 | CA ALA  | 66 | 5.866 | -4.838  | -5.469 | 1.00 | 0.00 |
| ATOM | 1025 | HA ALA  | 66 | 6.836 | -4.564  | -5.886 | 1.00 | 0.00 |
| ATOM | 1026 | CB ALA  | 66 | 4.955 | -5.261  | -6.601 | 1.00 | 0.00 |
| ATOM | 1027 | HB1 ALA | 66 | 3.978 | -5.529  | -6.201 | 1.00 | 0.00 |
| ATOM | 1028 | HB2 ALA | 66 | 4.845 | -4.437  | -7.307 | 1.00 | 0.00 |
| ATOM | 1029 | HB3 ALA | 66 | 5.386 | -6.121  | -7.113 | 1.00 | 0.00 |
| ATOM | 1030 | C ALA   | 66 | 5.319 | -3.625  | -4.777 | 1.00 | 0.00 |
| ATOM | 1031 | O ALA   | 66 | 5.924 | -2.594  | -4.924 | 1.00 | 0.00 |
| ATOM | 1032 | N ILE   | 67 | 4.237 | -3.727  | -4.010 | 1.00 | 0.00 |

|      |      |      |     |    |        |        |        |      |      |
|------|------|------|-----|----|--------|--------|--------|------|------|
| ATOM | 1033 | H    | ILE | 67 | 3.805  | -4.635 | -3.921 | 1.00 | 0.00 |
| ATOM | 1034 | CA   | ILE | 67 | 3.638  | -2.608 | -3.304 | 1.00 | 0.00 |
| ATOM | 1035 | HA   | ILE | 67 | 3.058  | -1.943 | -3.945 | 1.00 | 0.00 |
| ATOM | 1036 | CB   | ILE | 67 | 2.760  | -3.111 | -2.167 | 1.00 | 0.00 |
| ATOM | 1037 | HB   | ILE | 67 | 3.299  | -3.880 | -1.616 | 1.00 | 0.00 |
| ATOM | 1038 | CG2  | ILE | 67 | 2.400  | -1.954 | -1.215 | 1.00 | 0.00 |
| ATOM | 1039 | HG21 | ILE | 67 | 1.861  | -1.183 | -1.767 | 1.00 | 0.00 |
| ATOM | 1040 | HG22 | ILE | 67 | 1.772  | -2.329 | -0.408 | 1.00 | 0.00 |
| ATOM | 1041 | HG23 | ILE | 67 | 3.313  | -1.529 | -0.798 | 1.00 | 0.00 |
| ATOM | 1042 | CG1  | ILE | 67 | 1.530  | -3.841 | -2.740 | 1.00 | 0.00 |
| ATOM | 1043 | HG12 | ILE | 67 | 1.460  | -3.604 | -3.802 | 1.00 | 0.00 |
| ATOM | 1044 | HG13 | ILE | 67 | 1.684  | -4.913 | -2.617 | 1.00 | 0.00 |
| ATOM | 1045 | CD1  | ILE | 67 | 0.238  | -3.430 | -2.041 | 1.00 | 0.00 |
| ATOM | 1046 | HD11 | ILE | 67 | 0.083  | -2.358 | -2.165 | 1.00 | 0.00 |
| ATOM | 1047 | HD12 | ILE | 67 | -0.601 | -3.970 | -2.480 | 1.00 | 0.00 |
| ATOM | 1048 | HD13 | ILE | 67 | 0.308  | -3.666 | -0.980 | 1.00 | 0.00 |
| ATOM | 1049 | C    | ILE | 67 | 4.725  | -1.710 | -2.736 | 1.00 | 0.00 |
| ATOM | 1050 | O    | ILE | 67 | 4.755  | -0.542 | -3.006 | 1.00 | 0.00 |
| ATOM | 1051 | N    | MET | 68 | 5.677  | -2.213 | -1.983 | 1.00 | 0.00 |
| ATOM | 1052 | H    | MET | 68 | 5.648  | -3.193 | -1.741 | 1.00 | 0.00 |
| ATOM | 1053 | CA   | MET | 68 | 6.776  | -1.409 | -1.471 | 1.00 | 0.00 |
| ATOM | 1054 | HA   | MET | 68 | 6.437  | -0.759 | -0.664 | 1.00 | 0.00 |

|      |      |     |     |    |        |        |        |      |      |
|------|------|-----|-----|----|--------|--------|--------|------|------|
| ATOM | 1055 | CB  | MET | 68 | 7.838  | -2.339 | -0.929 | 1.00 | 0.00 |
| ATOM | 1056 | HB2 | MET | 68 | 8.162  | -3.001 | -1.732 | 1.00 | 0.00 |
| ATOM | 1057 | HB3 | MET | 68 | 8.683  | -1.740 | -0.589 | 1.00 | 0.00 |
| ATOM | 1058 | CG  | MET | 68 | 7.306  | -3.171 | 0.231  | 1.00 | 0.00 |
| ATOM | 1059 | HG2 | MET | 68 | 7.515  | -2.654 | 1.167  | 1.00 | 0.00 |
| ATOM | 1060 | HG3 | MET | 68 | 6.229  | -3.296 | 0.117  | 1.00 | 0.00 |
| ATOM | 1061 | SD  | MET | 68 | 8.094  | -4.799 | 0.261  | 1.00 | 0.00 |
| ATOM | 1062 | CE  | MET | 68 | 6.925  | -5.662 | 1.329  | 1.00 | 0.00 |
| ATOM | 1063 | HE1 | MET | 68 | 5.936  | -5.649 | 0.870  | 1.00 | 0.00 |
| ATOM | 1064 | HE2 | MET | 68 | 7.249  | -6.693 | 1.464  | 1.00 | 0.00 |
| ATOM | 1065 | HE3 | MET | 68 | 6.882  | -5.165 | 2.298  | 1.00 | 0.00 |
| ATOM | 1066 | C   | MET | 68 | 7.400  | -0.524 | -2.534 | 1.00 | 0.00 |
| ATOM | 1067 | O   | MET | 68 | 7.289  | 0.694  | -2.388 | 1.00 | 0.00 |
| ATOM | 1068 | N   | MET | 69 | 7.854  | -1.145 | -3.636 | 1.00 | 0.00 |
| ATOM | 1069 | H   | MET | 69 | 7.883  | -2.154 | -3.643 | 1.00 | 0.00 |
| ATOM | 1070 | CA  | MET | 69 | 8.356  | -0.438 | -4.792 | 1.00 | 0.00 |
| ATOM | 1071 | HA  | MET | 69 | 9.230  | 0.155  | -4.523 | 1.00 | 0.00 |
| ATOM | 1072 | CB  | MET | 69 | 8.759  | -1.439 | -5.863 | 1.00 | 0.00 |
| ATOM | 1073 | HB2 | MET | 69 | 8.029  | -2.248 | -5.869 | 1.00 | 0.00 |
| ATOM | 1074 | HB3 | MET | 69 | 8.747  | -0.932 | -6.829 | 1.00 | 0.00 |
| ATOM | 1075 | CG  | MET | 69 | 10.139 | -2.006 | -5.608 | 1.00 | 0.00 |
| ATOM | 1076 | HG2 | MET | 69 | 10.177 | -2.424 | -4.603 | 1.00 | 0.00 |



|      |      |         |    |        |        |        |      |      |
|------|------|---------|----|--------|--------|--------|------|------|
| ATOM | 1077 | HG3 MET | 69 | 10.346 | -2.791 | -6.336 | 1.00 | 0.00 |
| ATOM | 1078 | SD MET  | 69 | 11.391 | -0.709 | -5.760 | 1.00 | 0.00 |
| ATOM | 1079 | CE MET  | 69 | 12.809 | -1.596 | -5.111 | 1.00 | 0.00 |
| ATOM | 1080 | HE1 MET | 69 | 13.000 | -2.476 | -5.725 | 1.00 | 0.00 |
| ATOM | 1081 | HE2 MET | 69 | 13.684 | -0.945 | -5.128 | 1.00 | 0.00 |
| ATOM | 1082 | HE3 MET | 69 | 12.607 | -1.905 | -4.086 | 1.00 | 0.00 |
| ATOM | 1083 | C MET   | 69 | 7.376  | 0.566  | -5.393 | 1.00 | 0.00 |
| ATOM | 1084 | O MET   | 69 | 7.777  | 1.594  | -5.930 | 1.00 | 0.00 |
| ATOM | 1085 | N MET   | 70 | 6.085  | 0.295  | -5.301 | 1.00 | 0.00 |
| ATOM | 1086 | H MET   | 70 | 5.813  | -0.608 | -4.942 | 1.00 | 0.00 |
| ATOM | 1087 | CA MET  | 70 | 5.054  | 1.192  | -5.736 | 1.00 | 0.00 |
| ATOM | 1088 | HA MET  | 70 | 5.100  | 1.338  | -6.816 | 1.00 | 0.00 |
| ATOM | 1089 | CB MET  | 70 | 3.705  | 0.587  | -5.384 | 1.00 | 0.00 |
| ATOM | 1090 | HB2 MET | 70 | 3.086  | 0.664  | -6.278 | 1.00 | 0.00 |
| ATOM | 1091 | HB3 MET | 70 | 3.884  | -0.463 | -5.156 | 1.00 | 0.00 |
| ATOM | 1092 | CG MET  | 70 | 2.988  | 1.246  | -4.212 | 1.00 | 0.00 |
| ATOM | 1093 | HG2 MET | 70 | 3.744  | 1.426  | -3.448 | 1.00 | 0.00 |
| ATOM | 1094 | HG3 MET | 70 | 2.608  | 2.200  | -4.578 | 1.00 | 0.00 |
| ATOM | 1095 | SD MET  | 70 | 1.637  | 0.307  | -3.497 | 1.00 | 0.00 |
| ATOM | 1096 | CE MET  | 70 | 0.731  | 1.619  | -2.711 | 1.00 | 0.00 |
| ATOM | 1097 | HE1 MET | 70 | 0.417  | 2.345  | -3.462 | 1.00 | 0.00 |
| ATOM | 1098 | HE2 MET | 70 | -0.148 | 1.208  | -2.215 | 1.00 | 0.00 |

|      |      |          |    |       |       |        |      |      |
|------|------|----------|----|-------|-------|--------|------|------|
| ATOM | 1099 | HE3 MET  | 70 | 1.367 | 2.111 | -1.975 | 1.00 | 0.00 |
| ATOM | 1100 | C MET    | 70 | 5.205 | 2.568 | -5.121 | 1.00 | 0.00 |
| ATOM | 1101 | O MET    | 70 | 4.869 | 3.555 | -5.757 | 1.00 | 0.00 |
| ATOM | 1102 | N LEU    | 71 | 5.631 | 2.618 | -3.856 | 1.00 | 0.00 |
| ATOM | 1103 | H LEU    | 71 | 5.776 | 1.747 | -3.366 | 1.00 | 0.00 |
| ATOM | 1104 | CA LEU   | 71 | 5.783 | 3.852 | -3.120 | 1.00 | 0.00 |
| ATOM | 1105 | HA LEU   | 71 | 5.326 | 4.670 | -3.677 | 1.00 | 0.00 |
| ATOM | 1106 | CB LEU   | 71 | 5.108 | 3.755 | -1.752 | 1.00 | 0.00 |
| ATOM | 1107 | HB2 LEU  | 71 | 5.581 | 2.883 | -1.301 | 1.00 | 0.00 |
| ATOM | 1108 | HB3 LEU  | 71 | 5.340 | 4.641 | -1.161 | 1.00 | 0.00 |
| ATOM | 1109 | CG LEU   | 71 | 3.602 | 3.551 | -1.790 | 1.00 | 0.00 |
| ATOM | 1110 | HG LEU   | 71 | 3.385 | 2.511 | -2.033 | 1.00 | 0.00 |
| ATOM | 1111 | CD1 LEU  | 71 | 3.009 | 3.887 | -0.449 | 1.00 | 0.00 |
| ATOM | 1112 | HD11 LEU | 71 | 3.226 | 4.928 | -0.206 | 1.00 | 0.00 |
| ATOM | 1113 | HD12 LEU | 71 | 1.930 | 3.740 | -0.482 | 1.00 | 0.00 |
| ATOM | 1114 | HD13 LEU | 71 | 3.442 | 3.239 | 0.312  | 1.00 | 0.00 |
| ATOM | 1115 | CD2 LEU  | 71 | 2.904 | 4.338 | -2.893 | 1.00 | 0.00 |
| ATOM | 1116 | HD21 LEU | 71 | 3.297 | 4.033 | -3.863 | 1.00 | 0.00 |
| ATOM | 1117 | HD22 LEU | 71 | 1.832 | 4.142 | -2.858 | 1.00 | 0.00 |
| ATOM | 1118 | HD23 LEU | 71 | 3.083 | 5.404 | -2.749 | 1.00 | 0.00 |
| ATOM | 1119 | C LEU    | 71 | 7.259 | 4.178 | -3.059 | 1.00 | 0.00 |
| ATOM | 1120 | O LEU    | 71 | 7.739 | 4.722 | -2.073 | 1.00 | 0.00 |

|      |      |      |     |    |        |       |        |      |      |
|------|------|------|-----|----|--------|-------|--------|------|------|
| ATOM | 1121 | N    | ASN | 72 | 8.006  | 3.777 | -4.075 | 1.00 | 0.00 |
| ATOM | 1122 | H    | ASN | 72 | 7.567  | 3.214 | -4.790 | 1.00 | 0.00 |
| ATOM | 1123 | CA   | ASN | 72 | 9.416  | 4.067 | -4.201 | 1.00 | 0.00 |
| ATOM | 1124 | HA   | ASN | 72 | 9.736  | 4.745 | -3.410 | 1.00 | 0.00 |
| ATOM | 1125 | CB   | ASN | 72 | 10.211 | 2.773 | -4.084 | 1.00 | 0.00 |
| ATOM | 1126 | HB2  | ASN | 72 | 9.924  | 1.978 | -4.772 | 1.00 | 0.00 |
| ATOM | 1127 | HB3  | ASN | 72 | 11.224 | 3.104 | -4.314 | 1.00 | 0.00 |
| ATOM | 1128 | CG   | ASN | 72 | 10.190 | 2.226 | -2.679 | 1.00 | 0.00 |
| ATOM | 1129 | OD1  | ASN | 72 | 10.024 | 1.057 | -2.414 | 1.00 | 0.00 |
| ATOM | 1130 | ND2  | ASN | 72 | 10.529 | 3.037 | -1.710 | 1.00 | 0.00 |
| ATOM | 1131 | HD21 | ASN | 72 | 10.527 | 2.707 | -0.756 | 1.00 | 0.00 |
| ATOM | 1132 | HD22 | ASN | 72 | 10.791 | 3.990 | -1.921 | 1.00 | 0.00 |
| ATOM | 1133 | C    | ASN | 72 | 9.717  | 4.746 | -5.523 | 1.00 | 0.00 |
| ATOM | 1134 | O    | ASN | 72 | 10.881 | 4.987 | -5.832 | 1.00 | 0.00 |
| ATOM | 1135 | N    | GLU | 73 | 8.675  | 4.997 | -6.311 | 1.00 | 0.00 |
| ATOM | 1136 | H    | GLU | 73 | 7.756  | 4.678 | -6.040 | 1.00 | 0.00 |
| ATOM | 1137 | CA   | GLU | 73 | 8.825  | 5.629 | -7.587 | 1.00 | 0.00 |
| ATOM | 1138 | HA   | GLU | 73 | 9.595  | 5.124 | -8.171 | 1.00 | 0.00 |
| ATOM | 1139 | CB   | GLU | 73 | 7.496  | 5.556 | -8.359 | 1.00 | 0.00 |
| ATOM | 1140 | HB2  | GLU | 73 | 6.734  | 5.115 | -7.717 | 1.00 | 0.00 |
| ATOM | 1141 | HB3  | GLU | 73 | 7.193  | 6.564 | -8.642 | 1.00 | 0.00 |
| ATOM | 1142 | CG   | GLU | 73 | 7.660  | 4.694 | -9.627 | 1.00 | 0.00 |

|      |      |     |     |    |        |        |         |      |      |
|------|------|-----|-----|----|--------|--------|---------|------|------|
| ATOM | 1143 | HG2 | GLU | 73 | 8.695  | 4.565  | -9.943  | 1.00 | 0.00 |
| ATOM | 1144 | HG3 | GLU | 73 | 7.256  | 3.734  | -9.306  | 1.00 | 0.00 |
| ATOM | 1145 | CD  | GLU | 73 | 6.832  | 5.229  | -10.799 | 1.00 | 0.00 |
| ATOM | 1146 | OE1 | GLU | 73 | 5.698  | 5.690  | -10.533 | 1.00 | 0.00 |
| ATOM | 1147 | OE2 | GLU | 73 | 7.399  | 5.299  | -11.912 | 1.00 | 0.00 |
| ATOM | 1148 | C   | GLU | 73 | 9.322  | 7.066  | -7.431  | 1.00 | 0.00 |
| ATOM | 1149 | O   | GLU | 73 | 9.447  | 7.594  | -6.313  | 1.00 | 0.00 |
| ATOM | 1150 | N   | PRO | 74 | 9.547  | 7.758  | -8.558  | 1.00 | 0.00 |
| ATOM | 1151 | CD  | PRO | 74 | 9.391  | 7.272  | -9.921  | 1.00 | 0.00 |
| ATOM | 1152 | HD2 | PRO | 74 | 8.327  | 7.087  | -10.070 | 1.00 | 0.00 |
| ATOM | 1153 | HD3 | PRO | 74 | 9.936  | 6.331  | -9.984  | 1.00 | 0.00 |
| ATOM | 1154 | CG  | PRO | 74 | 9.935  | 8.317  | -10.868 | 1.00 | 0.00 |
| ATOM | 1155 | HG2 | PRO | 74 | 9.130  | 8.699  | -11.497 | 1.00 | 0.00 |
| ATOM | 1156 | HG3 | PRO | 74 | 10.708 | 7.876  | -11.498 | 1.00 | 0.00 |
| ATOM | 1157 | CB  | PRO | 74 | 10.514 | 9.410  | -9.983  | 1.00 | 0.00 |
| ATOM | 1158 | HB2 | PRO | 74 | 10.198 | 10.394 | -10.330 | 1.00 | 0.00 |
| ATOM | 1159 | HB3 | PRO | 74 | 11.603 | 9.362  | -9.974  | 1.00 | 0.00 |
| ATOM | 1160 | CA  | PRO | 74 | 9.964  | 9.152  | -8.569  | 1.00 | 0.00 |
| ATOM | 1161 | HA  | PRO | 74 | 10.784 | 9.265  | -7.861  | 1.00 | 0.00 |
| ATOM | 1162 | C   | PRO | 74 | 8.825  | 10.104 | -8.187  | 1.00 | 0.00 |
| ATOM | 1163 | O   | PRO | 74 | 8.664  | 11.174 | -8.774  | 1.00 | 0.00 |
| ATOM | 1164 | N   | MET | 75 | 8.050  | 9.735  | -7.175  | 1.00 | 0.00 |

|      |      |     |     |    |       |        |         |      |      |
|------|------|-----|-----|----|-------|--------|---------|------|------|
| ATOM | 1165 | H   | MET | 75 | 8.244 | 8.854  | -6.722  | 1.00 | 0.00 |
| ATOM | 1166 | CA  | MET | 75 | 6.942 | 10.516 | -6.701  | 1.00 | 0.00 |
| ATOM | 1167 | HA  | MET | 75 | 7.263 | 11.526 | -6.445  | 1.00 | 0.00 |
| ATOM | 1168 | CB  | MET | 75 | 5.896 | 10.603 | -7.814  | 1.00 | 0.00 |
| ATOM | 1169 | HB2 | MET | 75 | 6.394 | 10.528 | -8.781  | 1.00 | 0.00 |
| ATOM | 1170 | HB3 | MET | 75 | 5.187 | 9.783  | -7.706  | 1.00 | 0.00 |
| ATOM | 1171 | CG  | MET | 75 | 5.154 | 11.928 | -7.728  | 1.00 | 0.00 |
| ATOM | 1172 | HG2 | MET | 75 | 5.410 | 12.419 | -6.789  | 1.00 | 0.00 |
| ATOM | 1173 | HG3 | MET | 75 | 5.458 | 12.561 | -8.563  | 1.00 | 0.00 |
| ATOM | 1174 | SD  | MET | 75 | 3.359 | 11.672 | -7.797  | 1.00 | 0.00 |
| ATOM | 1175 | CE  | MET | 75 | 2.955 | 12.845 | -9.100  | 1.00 | 0.00 |
| ATOM | 1176 | HE1 | MET | 75 | 3.484 | 12.572 | -10.013 | 1.00 | 0.00 |
| ATOM | 1177 | HE2 | MET | 75 | 1.881 | 12.829 | -9.285  | 1.00 | 0.00 |
| ATOM | 1178 | HE3 | MET | 75 | 3.255 | 13.847 | -8.794  | 1.00 | 0.00 |
| ATOM | 1179 | C   | MET | 75 | 6.336 | 9.872  | -5.462  | 1.00 | 0.00 |
| ATOM | 1180 | O   | MET | 75 | 5.130 | 9.921  | -5.266  | 1.00 | 0.00 |
| ATOM | 1181 | N   | TRP | 76 | 7.147 | 9.209  | -4.647  | 1.00 | 0.00 |
| ATOM | 1182 | H   | TRP | 76 | 8.114 | 9.087  | -4.912  | 1.00 | 0.00 |
| ATOM | 1183 | CA  | TRP | 76 | 6.682 | 8.572  | -3.436  | 1.00 | 0.00 |
| ATOM | 1184 | HA  | TRP | 76 | 5.857 | 9.139  | -3.006  | 1.00 | 0.00 |
| ATOM | 1185 | CB  | TRP | 76 | 6.193 | 7.163  | -3.753  | 1.00 | 0.00 |
| ATOM | 1186 | HB2 | TRP | 76 | 6.868 | 6.731  | -4.493  | 1.00 | 0.00 |

|      |      |         |    |       |        |        |      |      |
|------|------|---------|----|-------|--------|--------|------|------|
| ATOM | 1187 | HB3 TRP | 76 | 6.182 | 6.536  | -2.862 | 1.00 | 0.00 |
| ATOM | 1188 | CG TRP  | 76 | 4.818 | 7.099  | -4.339 | 1.00 | 0.00 |
| ATOM | 1189 | CD1 TRP | 76 | 4.438 | 6.543  | -5.506 | 1.00 | 0.00 |
| ATOM | 1190 | HD1 TRP | 76 | 5.213 | 6.068  | -6.108 | 1.00 | 0.00 |
| ATOM | 1191 | NE1 TRP | 76 | 3.082 | 6.712  | -5.683 | 1.00 | 0.00 |
| ATOM | 1192 | HE1 TRP | 76 | 2.583 | 6.349  | -6.483 | 1.00 | 0.00 |
| ATOM | 1193 | CE2 TRP | 76 | 2.524 | 7.407  | -4.649 | 1.00 | 0.00 |
| ATOM | 1194 | CZ2 TRP | 76 | 1.229 | 7.818  | -4.370 | 1.00 | 0.00 |
| ATOM | 1195 | HZ2 TRP | 76 | 0.443 | 7.588  | -5.089 | 1.00 | 0.00 |
| ATOM | 1196 | CH2 TRP | 76 | 1.017 | 8.507  | -3.175 | 1.00 | 0.00 |
| ATOM | 1197 | HH2 TRP | 76 | 0.007 | 8.833  | -2.928 | 1.00 | 0.00 |
| ATOM | 1198 | CZ3 TRP | 76 | 2.054 | 8.792  | -2.290 | 1.00 | 0.00 |
| ATOM | 1199 | HZ3 TRP | 76 | 1.891 | 9.346  | -1.366 | 1.00 | 0.00 |
| ATOM | 1200 | CE3 TRP | 76 | 3.347 | 8.366  | -2.577 | 1.00 | 0.00 |
| ATOM | 1201 | HE3 TRP | 76 | 4.112 | 8.571  | -1.829 | 1.00 | 0.00 |
| ATOM | 1202 | CD2 TRP | 76 | 3.611 | 7.671  | -3.775 | 1.00 | 0.00 |
| ATOM | 1203 | C TRP   | 76 | 7.786 | 8.597  | -2.402 | 1.00 | 0.00 |
| ATOM | 1204 | O TRP   | 76 | 8.557 | 7.649  | -2.270 | 1.00 | 0.00 |
| ATOM | 1205 | N ILE   | 77 | 7.909 | 9.716  | -1.685 | 1.00 | 0.00 |
| ATOM | 1206 | H ILE   | 77 | 7.254 | 10.467 | -1.850 | 1.00 | 0.00 |
| ATOM | 1207 | CA ILE  | 77 | 9.011 | 9.949  | -0.751 | 1.00 | 0.00 |
| ATOM | 1208 | HA ILE  | 77 | 9.611 | 9.051  | -0.607 | 1.00 | 0.00 |

|      |      |      |     |    |        |        |        |      |      |
|------|------|------|-----|----|--------|--------|--------|------|------|
| ATOM | 1209 | CB   | ILE | 77 | 9.926  | 11.115 | -1.165 | 1.00 | 0.00 |
| ATOM | 1210 | HB   | ILE | 77 | 9.506  | 12.053 | -0.800 | 1.00 | 0.00 |
| ATOM | 1211 | CG2  | ILE | 77 | 11.328 | 10.912 | -0.563 | 1.00 | 0.00 |
| ATOM | 1212 | HG21 | ILE | 77 | 11.749 | 9.976  | -0.929 | 1.00 | 0.00 |
| ATOM | 1213 | HG22 | ILE | 77 | 11.974 | 11.740 | -0.858 | 1.00 | 0.00 |
| ATOM | 1214 | HG23 | ILE | 77 | 11.256 | 10.878 | 0.524  | 1.00 | 0.00 |
| ATOM | 1215 | CG1  | ILE | 77 | 9.978  | 11.308 | -2.682 | 1.00 | 0.00 |
| ATOM | 1216 | HG12 | ILE | 77 | 8.992  | 11.633 | -3.014 | 1.00 | 0.00 |
| ATOM | 1217 | HG13 | ILE | 77 | 10.708 | 12.088 | -2.898 | 1.00 | 0.00 |
| ATOM | 1218 | CD1  | ILE | 77 | 10.368 | 10.027 | -3.421 | 1.00 | 0.00 |
| ATOM | 1219 | HD11 | ILE | 77 | 9.638  | 9.247  | -3.207 | 1.00 | 0.00 |
| ATOM | 1220 | HD12 | ILE | 77 | 10.390 | 10.219 | -4.494 | 1.00 | 0.00 |
| ATOM | 1221 | HD13 | ILE | 77 | 11.354 | 9.702  | -3.090 | 1.00 | 0.00 |
| ATOM | 1222 | C    | ILE | 77 | 8.422  | 10.141 | 0.616  | 1.00 | 0.00 |
| ATOM | 1223 | O    | ILE | 77 | 7.483  | 9.469  | 0.980  | 1.00 | 0.00 |
| ATOM | 1224 | N    | ARG | 78 | 8.919  | 11.053 | 1.421  | 1.00 | 0.00 |
| ATOM | 1225 | H    | ARG | 78 | 9.701  | 11.599 | 1.089  | 1.00 | 0.00 |
| ATOM | 1226 | CA   | ARG | 78 | 8.392  | 11.341 | 2.726  | 1.00 | 0.00 |
| ATOM | 1227 | HA   | ARG | 78 | 8.614  | 10.513 | 3.398  | 1.00 | 0.00 |
| ATOM | 1228 | CB   | ARG | 78 | 9.004  | 12.607 | 3.298  | 1.00 | 0.00 |
| ATOM | 1229 | HB2  | ARG | 78 | 9.264  | 13.279 | 2.479  | 1.00 | 0.00 |
| ATOM | 1230 | HB3  | ARG | 78 | 8.276  | 13.093 | 3.948  | 1.00 | 0.00 |

|      |      |      |     |    |        |        |        |      |      |
|------|------|------|-----|----|--------|--------|--------|------|------|
| ATOM | 1231 | CG   | ARG | 78 | 10.260 | 12.273 | 4.100  | 1.00 | 0.00 |
| ATOM | 1232 | HG2  | ARG | 78 | 10.249 | 12.844 | 5.028  | 1.00 | 0.00 |
| ATOM | 1233 | HG3  | ARG | 78 | 10.260 | 11.208 | 4.328  | 1.00 | 0.00 |
| ATOM | 1234 | CD   | ARG | 78 | 11.517 | 12.623 | 3.303  | 1.00 | 0.00 |
| ATOM | 1235 | HD2  | ARG | 78 | 11.435 | 12.214 | 2.296  | 1.00 | 0.00 |
| ATOM | 1236 | HD3  | ARG | 78 | 11.622 | 13.707 | 3.246  | 1.00 | 0.00 |
| ATOM | 1237 | NE   | ARG | 78 | 12.718 | 12.066 | 3.941  | 1.00 | 0.00 |
| ATOM | 1238 | HE   | ARG | 78 | 12.568 | 11.551 | 4.796  | 1.00 | 0.00 |
| ATOM | 1239 | CZ   | ARG | 78 | 13.954 | 12.218 | 3.506  | 1.00 | 0.00 |
| ATOM | 1240 | NH1  | ARG | 78 | 14.198 | 12.882 | 2.406  | 1.00 | 0.00 |
| ATOM | 1241 | HH11 | ARG | 78 | 13.434 | 13.284 | 1.882  | 1.00 | 0.00 |
| ATOM | 1242 | HH12 | ARG | 78 | 15.150 | 12.990 | 2.085  | 1.00 | 0.00 |
| ATOM | 1243 | NH2  | ARG | 78 | 14.954 | 11.673 | 4.149  | 1.00 | 0.00 |
| ATOM | 1244 | HH21 | ARG | 78 | 14.779 | 11.133 | 4.983  | 1.00 | 0.00 |
| ATOM | 1245 | HH22 | ARG | 78 | 15.897 | 11.796 | 3.807  | 1.00 | 0.00 |
| ATOM | 1246 | C    | ARG | 78 | 6.913  | 11.581 | 2.708  | 1.00 | 0.00 |
| ATOM | 1247 | O    | ARG | 78 | 6.310  | 11.162 | 3.668  | 1.00 | 0.00 |
| ATOM | 1248 | N    | MET | 79 | 6.360  | 12.117 | 1.624  | 1.00 | 0.00 |
| ATOM | 1249 | H    | MET | 79 | 6.989  | 12.425 | 0.896  | 1.00 | 0.00 |
| ATOM | 1250 | CA   | MET | 79 | 4.938  | 12.269 | 1.410  | 1.00 | 0.00 |
| ATOM | 1251 | HA   | MET | 79 | 4.555  | 13.057 | 2.058  | 1.00 | 0.00 |
| ATOM | 1252 | CB   | MET | 79 | 4.637  | 12.640 | -0.038 | 1.00 | 0.00 |



|      |      |         |    |       |        |        |      |      |
|------|------|---------|----|-------|--------|--------|------|------|
| ATOM | 1253 | HB2 MET | 79 | 3.565 | 12.533 | -0.204 | 1.00 | 0.00 |
| ATOM | 1254 | HB3 MET | 79 | 4.926 | 13.680 | -0.193 | 1.00 | 0.00 |
| ATOM | 1255 | CG MET  | 79 | 5.398 | 11.746 | -1.025 | 1.00 | 0.00 |
| ATOM | 1256 | HG2 MET | 79 | 6.120 | 11.176 | -0.441 | 1.00 | 0.00 |
| ATOM | 1257 | HG3 MET | 79 | 4.667 | 11.066 | -1.462 | 1.00 | 0.00 |
| ATOM | 1258 | SD MET  | 79 | 6.250 | 12.606 | -2.330 | 1.00 | 0.00 |
| ATOM | 1259 | CE MET  | 79 | 5.165 | 12.199 | -3.690 | 1.00 | 0.00 |
| ATOM | 1260 | HE1 MET | 79 | 4.164 | 12.576 | -3.482 | 1.00 | 0.00 |
| ATOM | 1261 | HE2 MET | 79 | 5.542 | 12.657 | -4.606 | 1.00 | 0.00 |
| ATOM | 1262 | HE3 MET | 79 | 5.127 | 11.117 | -3.814 | 1.00 | 0.00 |
| ATOM | 1263 | C MET   | 79 | 4.196 | 10.989 | 1.694  | 1.00 | 0.00 |
| ATOM | 1264 | O MET   | 79 | 3.080 | 11.043 | 2.130  | 1.00 | 0.00 |
| ATOM | 1265 | N ARG   | 80 | 4.811 | 9.821  | 1.576  | 1.00 | 0.00 |
| ATOM | 1266 | H ARG   | 80 | 5.707 | 9.822  | 1.109  | 1.00 | 0.00 |
| ATOM | 1267 | CA ARG  | 80 | 4.262 | 8.574  | 1.978  | 1.00 | 0.00 |
| ATOM | 1268 | HA ARG  | 80 | 3.333 | 8.412  | 1.431  | 1.00 | 0.00 |
| ATOM | 1269 | CB ARG  | 80 | 5.184 | 7.413  | 1.714  | 1.00 | 0.00 |
| ATOM | 1270 | HB2 ARG | 80 | 6.102 | 7.557  | 2.284  | 1.00 | 0.00 |
| ATOM | 1271 | HB3 ARG | 80 | 4.695 | 6.495  | 2.039  | 1.00 | 0.00 |
| ATOM | 1272 | CG ARG  | 80 | 5.519 | 7.312  | 0.230  | 1.00 | 0.00 |
| ATOM | 1273 | HG2 ARG | 80 | 4.689 | 6.843  | -0.298 | 1.00 | 0.00 |
| ATOM | 1274 | HG3 ARG | 80 | 5.687 | 8.311  | -0.173 | 1.00 | 0.00 |

|      |      |      |     |    |        |        |        |      |      |
|------|------|------|-----|----|--------|--------|--------|------|------|
| ATOM | 1275 | CD   | ARG | 80 | 6.778  | 6.472  | 0.045  | 1.00 | 0.00 |
| ATOM | 1276 | HD2  | ARG | 80 | 6.509  | 5.432  | 0.223  | 1.00 | 0.00 |
| ATOM | 1277 | HD3  | ARG | 80 | 7.104  | 6.591  | -0.989 | 1.00 | 0.00 |
| ATOM | 1278 | NE   | ARG | 80 | 7.887  | 6.827  | 0.929  | 1.00 | 0.00 |
| ATOM | 1279 | HE   | ARG | 80 | 7.831  | 7.775  | 1.273  | 1.00 | 0.00 |
| ATOM | 1280 | CZ   | ARG | 80 | 8.898  | 6.091  | 1.296  | 1.00 | 0.00 |
| ATOM | 1281 | NH1  | ARG | 80 | 9.013  | 4.880  | 0.842  | 1.00 | 0.00 |
| ATOM | 1282 | HH11 | ARG | 80 | 8.319  | 4.515  | 0.206  | 1.00 | 0.00 |
| ATOM | 1283 | HH12 | ARG | 80 | 9.797  | 4.310  | 1.126  | 1.00 | 0.00 |
| ATOM | 1284 | NH2  | ARG | 80 | 9.788  | 6.569  | 2.129  | 1.00 | 0.00 |
| ATOM | 1285 | HH21 | ARG | 80 | 9.688  | 7.509  | 2.485  | 1.00 | 0.00 |
| ATOM | 1286 | HH22 | ARG | 80 | 10.570 | 5.996  | 2.411  | 1.00 | 0.00 |
| ATOM | 1287 | C    | ARG | 80 | 3.867  | 8.598  | 3.416  | 1.00 | 0.00 |
| ATOM | 1288 | O    | ARG | 80 | 3.149  | 7.712  | 3.732  | 1.00 | 0.00 |
| ATOM | 1289 | N    | ASP | 81 | 4.205  | 9.547  | 4.256  | 1.00 | 0.00 |
| ATOM | 1290 | H    | ASP | 81 | 4.745  | 10.290 | 3.835  | 1.00 | 0.00 |
| ATOM | 1291 | CA   | ASP | 81 | 3.875  | 9.650  | 5.663  | 1.00 | 0.00 |
| ATOM | 1292 | HA   | ASP | 81 | 4.611  | 9.120  | 6.267  | 1.00 | 0.00 |
| ATOM | 1293 | CB   | ASP | 81 | 3.878  | 11.120 | 6.070  | 1.00 | 0.00 |
| ATOM | 1294 | HB2  | ASP | 81 | 4.676  | 11.610 | 5.510  | 1.00 | 0.00 |
| ATOM | 1295 | HB3  | ASP | 81 | 2.920  | 11.564 | 5.799  | 1.00 | 0.00 |
| ATOM | 1296 | CG   | ASP | 81 | 4.119  | 11.304 | 7.565  | 1.00 | 0.00 |

|      |      |      |     |    |        |        |       |      |      |
|------|------|------|-----|----|--------|--------|-------|------|------|
| ATOM | 1297 | OD1  | ASP | 81 | 4.375  | 10.300 | 8.263 | 1.00 | 0.00 |
| ATOM | 1298 | OD2  | ASP | 81 | 4.022  | 12.467 | 7.997 | 1.00 | 0.00 |
| ATOM | 1299 | C    | ASP | 81 | 2.480  | 9.092  | 5.944 | 1.00 | 0.00 |
| ATOM | 1300 | O    | ASP | 81 | 2.304  | 8.122  | 6.675 | 1.00 | 0.00 |
| ATOM | 1301 | N    | GLN | 82 | 1.501  | 9.578  | 5.170 | 1.00 | 0.00 |
| ATOM | 1302 | H    | GLN | 82 | 1.706  | 10.324 | 4.520 | 1.00 | 0.00 |
| ATOM | 1303 | CA   | GLN | 82 | 0.145  | 9.125  | 5.280 | 1.00 | 0.00 |
| ATOM | 1304 | HA   | GLN | 82 | -0.070 | 8.924  | 6.329 | 1.00 | 0.00 |
| ATOM | 1305 | CB   | GLN | 82 | -0.855 | 10.136 | 4.767 | 1.00 | 0.00 |
| ATOM | 1306 | HB2  | GLN | 82 | -0.340 | 10.840 | 4.113 | 1.00 | 0.00 |
| ATOM | 1307 | HB3  | GLN | 82 | -1.626 | 9.613  | 4.201 | 1.00 | 0.00 |
| ATOM | 1308 | CG   | GLN | 82 | -1.496 | 10.891 | 5.918 | 1.00 | 0.00 |
| ATOM | 1309 | HG2  | GLN | 82 | -2.402 | 11.366 | 5.541 | 1.00 | 0.00 |
| ATOM | 1310 | HG3  | GLN | 82 | -1.755 | 10.198 | 6.718 | 1.00 | 0.00 |
| ATOM | 1311 | CD   | GLN | 82 | -0.584 | 11.966 | 6.483 | 1.00 | 0.00 |
| ATOM | 1312 | OE1  | GLN | 82 | -0.825 | 13.149 | 6.346 | 1.00 | 0.00 |
| ATOM | 1313 | NE2  | GLN | 82 | 0.498  | 11.566 | 7.108 | 1.00 | 0.00 |
| ATOM | 1314 | HE21 | GLN | 82 | 1.133  | 12.248 | 7.499 | 1.00 | 0.00 |
| ATOM | 1315 | HE22 | GLN | 82 | 0.692  | 10.579 | 7.194 | 1.00 | 0.00 |
| ATOM | 1316 | C    | GLN | 82 | -0.061 | 7.841  | 4.578 | 1.00 | 0.00 |
| ATOM | 1317 | O    | GLN | 82 | -0.150 | 6.864  | 5.302 | 1.00 | 0.00 |
| ATOM | 1318 | N    | VAL | 83 | -0.245 | 7.859  | 3.251 | 1.00 | 0.00 |

|      |      |      |     |    |        |       |        |      |      |
|------|------|------|-----|----|--------|-------|--------|------|------|
| ATOM | 1319 | H    | VAL | 83 | -0.392 | 8.776 | 2.853  | 1.00 | 0.00 |
| ATOM | 1320 | CA   | VAL | 83 | -0.318 | 6.712 | 2.374  | 1.00 | 0.00 |
| ATOM | 1321 | HA   | VAL | 83 | -1.331 | 6.322 | 2.280  | 1.00 | 0.00 |
| ATOM | 1322 | CB   | VAL | 83 | 0.227  | 6.986 | 0.983  | 1.00 | 0.00 |
| ATOM | 1323 | HB   | VAL | 83 | -0.622 | 7.087 | 0.307  | 1.00 | 0.00 |
| ATOM | 1324 | CG1  | VAL | 83 | 1.065  | 8.224 | 0.918  | 1.00 | 0.00 |
| ATOM | 1325 | HG11 | VAL | 83 | 1.915  | 8.124 | 1.592  | 1.00 | 0.00 |
| ATOM | 1326 | HG12 | VAL | 83 | 1.426  | 8.367 | -0.101 | 1.00 | 0.00 |
| ATOM | 1327 | HG13 | VAL | 83 | 0.466  | 9.085 | 1.214  | 1.00 | 0.00 |
| ATOM | 1328 | CG2  | VAL | 83 | 0.991  | 5.823 | 0.420  | 1.00 | 0.00 |
| ATOM | 1329 | HG21 | VAL | 83 | 0.336  | 4.954 | 0.356  | 1.00 | 0.00 |
| ATOM | 1330 | HG22 | VAL | 83 | 1.357  | 6.076 | -0.576 | 1.00 | 0.00 |
| ATOM | 1331 | HG23 | VAL | 83 | 1.836  | 5.594 | 1.069  | 1.00 | 0.00 |
| ATOM | 1332 | C    | VAL | 83 | 0.403  | 5.522 | 2.963  | 1.00 | 0.00 |
| ATOM | 1333 | O    | VAL | 83 | -0.180 | 4.482 | 3.041  | 1.00 | 0.00 |
| ATOM | 1334 | N    | MET | 84 | 1.633  | 5.610 | 3.410  | 1.00 | 0.00 |
| ATOM | 1335 | H    | MET | 84 | 2.094  | 6.485 | 3.203  | 1.00 | 0.00 |
| ATOM | 1336 | CA   | MET | 84 | 2.372  | 4.600 | 4.125  | 1.00 | 0.00 |
| ATOM | 1337 | HA   | MET | 84 | 2.800  | 3.886 | 3.422  | 1.00 | 0.00 |
| ATOM | 1338 | CB   | MET | 84 | 3.499  | 5.237 | 4.916  | 1.00 | 0.00 |
| ATOM | 1339 | HB2  | MET | 84 | 4.198  | 5.691 | 4.213  | 1.00 | 0.00 |
| ATOM | 1340 | HB3  | MET | 84 | 3.075  | 6.011 | 5.555  | 1.00 | 0.00 |

|      |      |     |     |    |        |       |        |      |      |
|------|------|-----|-----|----|--------|-------|--------|------|------|
| ATOM | 1341 | CG  | MET | 84 | 4.230  | 4.220 | 5.771  | 1.00 | 0.00 |
| ATOM | 1342 | HG2 | MET | 84 | 3.509  | 3.766 | 6.449  | 1.00 | 0.00 |
| ATOM | 1343 | HG3 | MET | 84 | 4.641  | 3.455 | 5.112  | 1.00 | 0.00 |
| ATOM | 1344 | SD  | MET | 84 | 5.568  | 4.956 | 6.733  | 1.00 | 0.00 |
| ATOM | 1345 | CE  | MET | 84 | 4.670  | 6.387 | 7.415  | 1.00 | 0.00 |
| ATOM | 1346 | HE1 | MET | 84 | 3.826  | 6.038 | 8.009  | 1.00 | 0.00 |
| ATOM | 1347 | HE2 | MET | 84 | 5.341  | 6.971 | 8.045  | 1.00 | 0.00 |
| ATOM | 1348 | HE3 | MET | 84 | 4.305  | 7.011 | 6.598  | 1.00 | 0.00 |
| ATOM | 1349 | C   | MET | 84 | 1.499  | 3.808 | 5.085  | 1.00 | 0.00 |
| ATOM | 1350 | O   | MET | 84 | 1.307  | 2.609 | 4.886  | 1.00 | 0.00 |
| ATOM | 1351 | N   | SER | 85 | 0.935  | 4.474 | 6.094  | 1.00 | 0.00 |
| ATOM | 1352 | H   | SER | 85 | 1.229  | 5.426 | 6.261  | 1.00 | 0.00 |
| ATOM | 1353 | CA  | SER | 85 | -0.016 | 3.877 | 7.010  | 1.00 | 0.00 |
| ATOM | 1354 | HA  | SER | 85 | 0.247  | 2.836 | 7.195  | 1.00 | 0.00 |
| ATOM | 1355 | CB  | SER | 85 | -0.002 | 4.624 | 8.333  | 1.00 | 0.00 |
| ATOM | 1356 | HB2 | SER | 85 | 1.024  | 4.850 | 8.623  | 1.00 | 0.00 |
| ATOM | 1357 | HB3 | SER | 85 | -0.566 | 5.553 | 8.243  | 1.00 | 0.00 |
| ATOM | 1358 | OG  | SER | 85 | -0.601 | 3.800 | 9.319  | 1.00 | 0.00 |
| ATOM | 1359 | HG  | SER | 85 | -0.600 | 4.259 | 10.162 | 1.00 | 0.00 |
| ATOM | 1360 | C   | SER | 85 | -1.436 | 3.827 | 6.430  | 1.00 | 0.00 |
| ATOM | 1361 | O   | SER | 85 | -2.426 | 3.932 | 7.141  | 1.00 | 0.00 |
| ATOM | 1362 | N   | MET | 86 | -1.565 | 3.523 | 5.147  | 1.00 | 0.00 |

|      |      |     |     |    |        |       |       |      |      |
|------|------|-----|-----|----|--------|-------|-------|------|------|
| ATOM | 1363 | H   | MET | 86 | -0.720 | 3.352 | 4.621 | 1.00 | 0.00 |
| ATOM | 1364 | CA  | MET | 86 | -2.829 | 3.437 | 4.457 | 1.00 | 0.00 |
| ATOM | 1365 | HA  | MET | 86 | -3.613 | 3.099 | 5.134 | 1.00 | 0.00 |
| ATOM | 1366 | CB  | MET | 86 | -3.199 | 4.807 | 3.936 | 1.00 | 0.00 |
| ATOM | 1367 | HB2 | MET | 86 | -2.279 | 5.313 | 3.641 | 1.00 | 0.00 |
| ATOM | 1368 | HB3 | MET | 86 | -3.835 | 4.672 | 3.061 | 1.00 | 0.00 |
| ATOM | 1369 | CG  | MET | 86 | -3.928 | 5.646 | 4.965 | 1.00 | 0.00 |
| ATOM | 1370 | HG2 | MET | 86 | -3.299 | 5.770 | 5.846 | 1.00 | 0.00 |
| ATOM | 1371 | HG3 | MET | 86 | -4.157 | 6.625 | 4.542 | 1.00 | 0.00 |
| ATOM | 1372 | SD  | MET | 86 | -5.469 | 4.830 | 5.444 | 1.00 | 0.00 |
| ATOM | 1373 | CE  | MET | 86 | -5.907 | 5.868 | 6.849 | 1.00 | 0.00 |
| ATOM | 1374 | HE1 | MET | 86 | -6.026 | 6.900 | 6.516 | 1.00 | 0.00 |
| ATOM | 1375 | HE2 | MET | 86 | -6.843 | 5.517 | 7.283 | 1.00 | 0.00 |
| ATOM | 1376 | HE3 | MET | 86 | -5.117 | 5.818 | 7.598 | 1.00 | 0.00 |
| ATOM | 1377 | C   | MET | 86 | -2.790 | 2.468 | 3.293 | 1.00 | 0.00 |
| ATOM | 1378 | O   | MET | 86 | -3.604 | 1.568 | 3.225 | 1.00 | 0.00 |
| ATOM | 1379 | N   | ALA | 87 | -1.771 | 2.505 | 2.459 | 1.00 | 0.00 |
| ATOM | 1380 | H   | ALA | 87 | -1.137 | 3.279 | 2.595 | 1.00 | 0.00 |
| ATOM | 1381 | CA  | ALA | 87 | -1.519 | 1.607 | 1.380 | 1.00 | 0.00 |
| ATOM | 1382 | HA  | ALA | 87 | -2.445 | 1.347 | 0.867 | 1.00 | 0.00 |
| ATOM | 1383 | CB  | ALA | 87 | -0.575 | 2.264 | 0.377 | 1.00 | 0.00 |
| ATOM | 1384 | HB1 | ALA | 87 | 0.361  | 2.523 | 0.873 | 1.00 | 0.00 |

|      |      |         |    |        |        |        |      |      |
|------|------|---------|----|--------|--------|--------|------|------|
| ATOM | 1385 | HB2 ALA | 87 | -0.373 | 1.572  | -0.441 | 1.00 | 0.00 |
| ATOM | 1386 | HB3 ALA | 87 | -1.037 | 3.168  | -0.020 | 1.00 | 0.00 |
| ATOM | 1387 | C ALA   | 87 | -0.943 | 0.317  | 1.928  | 1.00 | 0.00 |
| ATOM | 1388 | O ALA   | 87 | -0.544 | -0.525 | 1.159  | 1.00 | 0.00 |
| ATOM | 1389 | N HIE   | 88 | -0.820 | 0.152  | 3.237  | 1.00 | 0.00 |
| ATOM | 1390 | H HIE   | 88 | -1.001 | 0.944  | 3.837  | 1.00 | 0.00 |
| ATOM | 1391 | CA HIE  | 88 | -0.373 | -1.072 | 3.841  | 1.00 | 0.00 |
| ATOM | 1392 | HA HIE  | 88 | 0.156  | -1.691 | 3.116  | 1.00 | 0.00 |
| ATOM | 1393 | CB HIE  | 88 | 0.582  | -0.727 | 4.975  | 1.00 | 0.00 |
| ATOM | 1394 | HB2 HIE | 88 | 1.205  | -1.591 | 5.203  | 1.00 | 0.00 |
| ATOM | 1395 | HB3 HIE | 88 | 1.214  | 0.101  | 4.653  | 1.00 | 0.00 |
| ATOM | 1396 | CG HIE  | 88 | -0.060 | -0.302 | 6.275  | 1.00 | 0.00 |
| ATOM | 1397 | ND1 HIE | 88 | 0.214  | -0.857 | 7.506  | 1.00 | 0.00 |
| ATOM | 1398 | CE1 HIE | 88 | -0.519 | -0.196 | 8.431  | 1.00 | 0.00 |
| ATOM | 1399 | HE1 HIE | 88 | -0.424 | -0.460 | 9.484  | 1.00 | 0.00 |
| ATOM | 1400 | NE2 HIE | 88 | -1.286 | 0.738  | 7.813  | 1.00 | 0.00 |
| ATOM | 1401 | HE2 HIE | 88 | -1.944 | 1.377  | 8.235  | 1.00 | 0.00 |
| ATOM | 1402 | CD2 HIE | 88 | -1.007 | 0.667  | 6.462  | 1.00 | 0.00 |
| ATOM | 1403 | HD2 HIE | 88 | -1.522 | 1.327  | 5.763  | 1.00 | 0.00 |
| ATOM | 1404 | C HIE   | 88 | -1.560 | -1.878 | 4.306  | 1.00 | 0.00 |
| ATOM | 1405 | O HIE   | 88 | -1.423 | -3.062 | 4.476  | 1.00 | 0.00 |
| ATOM | 1406 | N ASN   | 89 | -2.691 | -1.238 | 4.583  | 1.00 | 0.00 |

|      |      |      |     |    |        |        |        |      |      |
|------|------|------|-----|----|--------|--------|--------|------|------|
| ATOM | 1407 | H    | ASN | 89 | -2.700 | -0.231 | 4.497  | 1.00 | 0.00 |
| ATOM | 1408 | CA   | ASN | 89 | -3.911 | -1.903 | 4.975  | 1.00 | 0.00 |
| ATOM | 1409 | HA   | ASN | 89 | -3.700 | -2.933 | 5.260  | 1.00 | 0.00 |
| ATOM | 1410 | CB   | ASN | 89 | -4.534 | -1.186 | 6.165  | 1.00 | 0.00 |
| ATOM | 1411 | HB2  | ASN | 89 | -4.299 | -0.122 | 6.118  | 1.00 | 0.00 |
| ATOM | 1412 | HB3  | ASN | 89 | -5.616 | -1.319 | 6.157  | 1.00 | 0.00 |
| ATOM | 1413 | CG   | ASN | 89 | -3.989 | -1.743 | 7.454  | 1.00 | 0.00 |
| ATOM | 1414 | OD1  | ASN | 89 | -4.668 | -2.108 | 8.379  | 1.00 | 0.00 |
| ATOM | 1415 | ND2  | ASN | 89 | -2.687 | -1.817 | 7.541  | 1.00 | 0.00 |
| ATOM | 1416 | HD21 | ASN | 89 | -2.260 | -2.181 | 8.380  | 1.00 | 0.00 |
| ATOM | 1417 | HD22 | ASN | 89 | -2.114 | -1.509 | 6.768  | 1.00 | 0.00 |
| ATOM | 1418 | C    | ASN | 89 | -4.913 | -1.878 | 3.848  | 1.00 | 0.00 |
| ATOM | 1419 | O    | ASN | 89 | -5.771 | -2.717 | 3.828  | 1.00 | 0.00 |
| ATOM | 1420 | N    | LEU | 90 | -4.809 | -0.949 | 2.907  | 1.00 | 0.00 |
| ATOM | 1421 | H    | LEU | 90 | -4.141 | -0.204 | 3.048  | 1.00 | 0.00 |
| ATOM | 1422 | CA   | LEU | 90 | -5.653 | -0.900 | 1.730  | 1.00 | 0.00 |
| ATOM | 1423 | HA   | LEU | 90 | -6.702 | -0.844 | 2.019  | 1.00 | 0.00 |
| ATOM | 1424 | CB   | LEU | 90 | -5.307 | 0.344  | 0.901  | 1.00 | 0.00 |
| ATOM | 1425 | HB2  | LEU | 90 | -4.238 | 0.506  | 1.040  | 1.00 | 0.00 |
| ATOM | 1426 | HB3  | LEU | 90 | -5.508 | 0.134  | -0.150 | 1.00 | 0.00 |
| ATOM | 1427 | CG   | LEU | 90 | -6.070 | 1.598  | 1.324  | 1.00 | 0.00 |
| ATOM | 1428 | HG   | LEU | 90 | -6.093 | 1.655  | 2.412  | 1.00 | 0.00 |



|      |      |          |    |        |        |        |      |      |
|------|------|----------|----|--------|--------|--------|------|------|
| ATOM | 1429 | CD1 LEU  | 90 | -5.379 | 2.846  | 0.762  | 1.00 | 0.00 |
| ATOM | 1430 | HD11 LEU | 90 | -5.356 | 2.791  | -0.327 | 1.00 | 0.00 |
| ATOM | 1431 | HD12 LEU | 90 | -5.929 | 3.736  | 1.068  | 1.00 | 0.00 |
| ATOM | 1432 | HD13 LEU | 90 | -4.359 | 2.901  | 1.144  | 1.00 | 0.00 |
| ATOM | 1433 | CD2 LEU  | 90 | -7.513 | 1.518  | 0.834  | 1.00 | 0.00 |
| ATOM | 1434 | HD21 LEU | 90 | -7.996 | 0.642  | 1.265  | 1.00 | 0.00 |
| ATOM | 1435 | HD22 LEU | 90 | -8.051 | 2.416  | 1.139  | 1.00 | 0.00 |
| ATOM | 1436 | HD23 LEU | 90 | -7.524 | 1.441  | -0.254 | 1.00 | 0.00 |
| ATOM | 1437 | C LEU    | 90 | -5.525 | -2.181 | 0.903  | 1.00 | 0.00 |
| ATOM | 1438 | O LEU    | 90 | -6.528 | -2.799 | 0.569  | 1.00 | 0.00 |
| ATOM | 1439 | N PRO    | 91 | -4.291 | -2.604 | 0.576  | 1.00 | 0.00 |
| ATOM | 1440 | CD PRO   | 91 | -3.031 | -1.990 | 0.918  | 1.00 | 0.00 |
| ATOM | 1441 | HD2 PRO  | 91 | -2.920 | -2.068 | 1.999  | 1.00 | 0.00 |
| ATOM | 1442 | HD3 PRO  | 91 | -3.100 | -0.939 | 0.636  | 1.00 | 0.00 |
| ATOM | 1443 | CG PRO   | 91 | -1.942 | -2.714 | 0.171  | 1.00 | 0.00 |
| ATOM | 1444 | HG2 PRO  | 91 | -1.265 | -3.184 | 0.884  | 1.00 | 0.00 |
| ATOM | 1445 | HG3 PRO  | 91 | -1.387 | -2.001 | -0.441 | 1.00 | 0.00 |
| ATOM | 1446 | CB PRO   | 91 | -2.630 | -3.736 | -0.688 | 1.00 | 0.00 |
| ATOM | 1447 | HB2 PRO  | 91 | -2.131 | -4.693 | -0.541 | 1.00 | 0.00 |
| ATOM | 1448 | HB3 PRO  | 91 | -2.632 | -3.488 | -1.750 | 1.00 | 0.00 |
| ATOM | 1449 | CA PRO   | 91 | -4.059 | -3.811 | -0.169 | 1.00 | 0.00 |
| ATOM | 1450 | HA PRO   | 91 | -4.764 | -3.861 | -0.999 | 1.00 | 0.00 |

|      |      |      |     |    |        |        |       |      |      |
|------|------|------|-----|----|--------|--------|-------|------|------|
| ATOM | 1451 | C    | PRO | 91 | -4.246 | -5.014 | 0.723 | 1.00 | 0.00 |
| ATOM | 1452 | O    | PRO | 91 | -4.760 | -6.012 | 0.277 | 1.00 | 0.00 |
| ATOM | 1453 | N    | ILE | 92 | -3.870 | -4.967 | 1.981 | 1.00 | 0.00 |
| ATOM | 1454 | H    | ILE | 92 | -3.383 | -4.152 | 2.326 | 1.00 | 0.00 |
| ATOM | 1455 | CA   | ILE | 92 | -4.077 | -6.077 | 2.885 | 1.00 | 0.00 |
| ATOM | 1456 | HA   | ILE | 92 | -3.718 | -7.036 | 2.511 | 1.00 | 0.00 |
| ATOM | 1457 | CB   | ILE | 92 | -3.389 | -5.758 | 4.206 | 1.00 | 0.00 |
| ATOM | 1458 | HB   | ILE | 92 | -3.422 | -4.680 | 4.364 | 1.00 | 0.00 |
| ATOM | 1459 | CG2  | ILE | 92 | -4.080 | -6.468 | 5.376 | 1.00 | 0.00 |
| ATOM | 1460 | HG21 | ILE | 92 | -4.047 | -7.546 | 5.218 | 1.00 | 0.00 |
| ATOM | 1461 | HG22 | ILE | 92 | -3.567 | -6.221 | 6.305 | 1.00 | 0.00 |
| ATOM | 1462 | HG23 | ILE | 92 | -5.118 | -6.142 | 5.437 | 1.00 | 0.00 |
| ATOM | 1463 | CG1  | ILE | 92 | -1.899 | -6.085 | 4.127 | 1.00 | 0.00 |
| ATOM | 1464 | HG12 | ILE | 92 | -1.773 | -6.827 | 3.339 | 1.00 | 0.00 |
| ATOM | 1465 | HG13 | ILE | 92 | -1.381 | -5.167 | 3.847 | 1.00 | 0.00 |
| ATOM | 1466 | CD1  | ILE | 92 | -1.316 | -6.619 | 5.423 | 1.00 | 0.00 |
| ATOM | 1467 | HD11 | ILE | 92 | -1.832 | -7.536 | 5.703 | 1.00 | 0.00 |
| ATOM | 1468 | HD12 | ILE | 92 | -0.255 | -6.827 | 5.286 | 1.00 | 0.00 |
| ATOM | 1469 | HD13 | ILE | 92 | -1.441 | -5.876 | 6.211 | 1.00 | 0.00 |
| ATOM | 1470 | C    | ILE | 92 | -5.553 | -6.356 | 3.086 | 1.00 | 0.00 |
| ATOM | 1471 | O    | ILE | 92 | -5.939 | -7.514 | 3.030 | 1.00 | 0.00 |
| ATOM | 1472 | N    | GLU | 93 | -6.354 | -5.317 | 3.283 | 1.00 | 0.00 |

|      |      |     |     |    |         |        |        |      |      |
|------|------|-----|-----|----|---------|--------|--------|------|------|
| ATOM | 1473 | H   | GLU | 93 | -5.953  | -4.391 | 3.331  | 1.00 | 0.00 |
| ATOM | 1474 | CA  | GLU | 93 | -7.792  | -5.457 | 3.461  | 1.00 | 0.00 |
| ATOM | 1475 | HA  | GLU | 93 | -7.994  | -6.158 | 4.270  | 1.00 | 0.00 |
| ATOM | 1476 | CB  | GLU | 93 | -8.432  | -4.107 | 3.810  | 1.00 | 0.00 |
| ATOM | 1477 | HB2 | GLU | 93 | -7.907  | -3.320 | 3.267  | 1.00 | 0.00 |
| ATOM | 1478 | HB3 | GLU | 93 | -9.477  | -4.125 | 3.500  | 1.00 | 0.00 |
| ATOM | 1479 | CG  | GLU | 93 | -8.350  | -3.830 | 5.319  | 1.00 | 0.00 |
| ATOM | 1480 | HG2 | GLU | 93 | -7.958  | -4.724 | 5.804  | 1.00 | 0.00 |
| ATOM | 1481 | HG3 | GLU | 93 | -7.678  | -2.992 | 5.504  | 1.00 | 0.00 |
| ATOM | 1482 | CD  | GLU | 93 | -9.734  | -3.508 | 5.885  | 1.00 | 0.00 |
| ATOM | 1483 | OE1 | GLU | 93 | -10.353 | -2.545 | 5.372  | 1.00 | 0.00 |
| ATOM | 1484 | OE2 | GLU | 93 | -10.146 | -4.210 | 6.833  | 1.00 | 0.00 |
| ATOM | 1485 | C   | GLU | 93 | -8.443  | -6.007 | 2.194  | 1.00 | 0.00 |
| ATOM | 1486 | O   | GLU | 93 | -9.542  | -6.546 | 2.242  | 1.00 | 0.00 |
| ATOM | 1487 | N   | CYX | 94 | -7.750  | -5.886 | 1.058  | 1.00 | 0.00 |
| ATOM | 1488 | H   | CYX | 94 | -6.918  | -5.312 | 1.044  | 1.00 | 0.00 |
| ATOM | 1489 | CA  | CYX | 94 | -8.189  | -6.479 | -0.177 | 1.00 | 0.00 |
| ATOM | 1490 | HA  | CYX | 94 | -9.274  | -6.582 | -0.183 | 1.00 | 0.00 |
| ATOM | 1491 | CB  | CYX | 94 | -7.779  | -5.586 | -1.344 | 1.00 | 0.00 |
| ATOM | 1492 | HB2 | CYX | 94 | -6.837  | -5.090 | -1.110 | 1.00 | 0.00 |
| ATOM | 1493 | HB3 | CYX | 94 | -7.656  | -6.193 | -2.241 | 1.00 | 0.00 |
| ATOM | 1494 | SG  | CYX | 94 | -9.041  | -4.336 | -1.741 | 1.00 | 0.00 |

|      |      |      |     |    |        |         |        |      |      |
|------|------|------|-----|----|--------|---------|--------|------|------|
| ATOM | 1495 | C    | CYX | 94 | -7.653 | -7.886  | -0.342 | 1.00 | 0.00 |
| ATOM | 1496 | O    | CYX | 94 | -8.105 | -8.536  | -1.278 | 1.00 | 0.00 |
| ATOM | 1497 | N    | ASN | 95 | -6.691 | -8.311  | 0.492  | 1.00 | 0.00 |
| ATOM | 1498 | H    | ASN | 95 | -6.376 | -7.630  | 1.168  | 1.00 | 0.00 |
| ATOM | 1499 | CA   | ASN | 95 | -6.046 | -9.613  | 0.473  | 1.00 | 0.00 |
| ATOM | 1500 | HA   | ASN | 95 | -5.605 | -9.829  | 1.446  | 1.00 | 0.00 |
| ATOM | 1501 | CB   | ASN | 95 | -7.081 | -10.696 | 0.153  | 1.00 | 0.00 |
| ATOM | 1502 | HB2  | ASN | 95 | -8.026 | -10.385 | 0.597  | 1.00 | 0.00 |
| ATOM | 1503 | HB3  | ASN | 95 | -7.207 | -10.812 | -0.924 | 1.00 | 0.00 |
| ATOM | 1504 | CG   | ASN | 95 | -6.689 | -12.023 | 0.737  | 1.00 | 0.00 |
| ATOM | 1505 | OD1  | ASN | 95 | -7.426 | -12.619 | 1.495  | 1.00 | 0.00 |
| ATOM | 1506 | ND2  | ASN | 95 | -5.502 | -12.490 | 0.433  | 1.00 | 0.00 |
| ATOM | 1507 | HD21 | ASN | 95 | -5.202 | -13.379 | 0.806  | 1.00 | 0.00 |
| ATOM | 1508 | HD22 | ASN | 95 | -4.893 | -11.958 | -0.173 | 1.00 | 0.00 |
| ATOM | 1509 | C    | ASN | 95 | -4.907 | -9.585  | -0.565 | 1.00 | 0.00 |
| ATOM | 1510 | O    | ASN | 95 | -4.548 | -10.563 | -1.197 | 1.00 | 0.00 |
| ATOM | 1511 | N    | LEU | 96 | -4.370 | -8.431  | -0.882 | 1.00 | 0.00 |
| ATOM | 1512 | H    | LEU | 96 | -4.752 | -7.599  | -0.456 | 1.00 | 0.00 |
| ATOM | 1513 | CA   | LEU | 96 | -3.347 | -8.277  | -1.877 | 1.00 | 0.00 |
| ATOM | 1514 | HA   | LEU | 96 | -3.518 | -8.988  | -2.685 | 1.00 | 0.00 |
| ATOM | 1515 | CB   | LEU | 96 | -3.347 | -6.876  | -2.457 | 1.00 | 0.00 |
| ATOM | 1516 | HB2  | LEU | 96 | -2.933 | -6.283  | -1.642 | 1.00 | 0.00 |

|      |      |      |     |    |        |        |        |      |      |
|------|------|------|-----|----|--------|--------|--------|------|------|
| ATOM | 1517 | HB3  | LEU | 96 | -2.689 | -6.809 | -3.324 | 1.00 | 0.00 |
| ATOM | 1518 | CG   | LEU | 96 | -4.731 | -6.340 | -2.825 | 1.00 | 0.00 |
| ATOM | 1519 | HG   | LEU | 96 | -5.380 | -6.409 | -1.953 | 1.00 | 0.00 |
| ATOM | 1520 | CD1  | LEU | 96 | -4.643 | -4.905 | -3.271 | 1.00 | 0.00 |
| ATOM | 1521 | HD11 | LEU | 96 | -3.994 | -4.834 | -4.144 | 1.00 | 0.00 |
| ATOM | 1522 | HD12 | LEU | 96 | -5.638 | -4.542 | -3.529 | 1.00 | 0.00 |
| ATOM | 1523 | HD13 | LEU | 96 | -4.233 | -4.297 | -2.465 | 1.00 | 0.00 |
| ATOM | 1524 | CD2  | LEU | 96 | -5.432 | -7.202 | -3.855 | 1.00 | 0.00 |
| ATOM | 1525 | HD21 | LEU | 96 | -5.557 | -8.210 | -3.462 | 1.00 | 0.00 |
| ATOM | 1526 | HD22 | LEU | 96 | -6.410 | -6.776 | -4.081 | 1.00 | 0.00 |
| ATOM | 1527 | HD23 | LEU | 96 | -4.834 | -7.239 | -4.766 | 1.00 | 0.00 |
| ATOM | 1528 | C    | LEU | 96 | -2.047 | -8.676 | -1.226 | 1.00 | 0.00 |
| ATOM | 1529 | O    | LEU | 96 | -1.494 | -9.692 | -1.595 | 1.00 | 0.00 |
| ATOM | 1530 | N    | MET | 97 | -1.665 | -7.973 | -0.162 | 1.00 | 0.00 |
| ATOM | 1531 | H    | MET | 97 | -2.236 | -7.191 | 0.125  | 1.00 | 0.00 |
| ATOM | 1532 | CA   | MET | 97 | -0.437 | -8.225 | 0.555  | 1.00 | 0.00 |
| ATOM | 1533 | HA   | MET | 97 | 0.074  | -9.092 | 0.138  | 1.00 | 0.00 |
| ATOM | 1534 | CB   | MET | 97 | 0.478  | -7.015 | 0.430  | 1.00 | 0.00 |
| ATOM | 1535 | HB2  | MET | 97 | 1.449  | -7.280 | 0.847  | 1.00 | 0.00 |
| ATOM | 1536 | HB3  | MET | 97 | 0.589  | -6.783 | -0.630 | 1.00 | 0.00 |
| ATOM | 1537 | CG   | MET | 97 | -0.069 | -5.804 | 1.157  | 1.00 | 0.00 |
| ATOM | 1538 | HG2  | MET | 97 | -0.217 | -5.009 | 0.425  | 1.00 | 0.00 |

|      |      |     |     |    |        |         |       |      |      |
|------|------|-----|-----|----|--------|---------|-------|------|------|
| ATOM | 1539 | HG3 | MET | 97 | -1.029 | -6.077  | 1.594 | 1.00 | 0.00 |
| ATOM | 1540 | SD  | MET | 97 | 1.034  | -5.211  | 2.466 | 1.00 | 0.00 |
| ATOM | 1541 | CE  | MET | 97 | 2.507  | -4.929  | 1.461 | 1.00 | 0.00 |
| ATOM | 1542 | HE1 | MET | 97 | 2.284  | -4.195  | 0.686 | 1.00 | 0.00 |
| ATOM | 1543 | HE2 | MET | 97 | 3.313  | -4.555  | 2.093 | 1.00 | 0.00 |
| ATOM | 1544 | HE3 | MET | 97 | 2.815  | -5.865  | 0.995 | 1.00 | 0.00 |
| ATOM | 1545 | C   | MET | 97 | -0.666 | -8.568  | 1.992 | 1.00 | 0.00 |
| ATOM | 1546 | O   | MET | 97 | 0.236  | -8.299  | 2.776 | 1.00 | 0.00 |
| ATOM | 1547 | N   | SER | 98 | -1.867 | -9.074  | 2.313 | 1.00 | 0.00 |
| ATOM | 1548 | H   | SER | 98 | -2.551 | -9.174  | 1.576 | 1.00 | 0.00 |
| ATOM | 1549 | CA  | SER | 98 | -2.264 | -9.412  | 3.677 | 1.00 | 0.00 |
| ATOM | 1550 | HA  | SER | 98 | -2.589 | -8.509  | 4.195 | 1.00 | 0.00 |
| ATOM | 1551 | CB  | SER | 98 | -3.407 | -10.414 | 3.683 | 1.00 | 0.00 |
| ATOM | 1552 | HB2 | SER | 98 | -3.681 | -10.623 | 4.716 | 1.00 | 0.00 |
| ATOM | 1553 | HB3 | SER | 98 | -4.258 | -9.974  | 3.163 | 1.00 | 0.00 |
| ATOM | 1554 | OG  | SER | 98 | -3.033 | -11.621 | 3.040 | 1.00 | 0.00 |
| ATOM | 1555 | HG  | SER | 98 | -3.771 | -12.234 | 3.057 | 1.00 | 0.00 |
| ATOM | 1556 | C   | SER | 98 | -1.102 | -9.951  | 4.528 | 1.00 | 0.00 |
| ATOM | 1557 | O   | SER | 98 | -0.506 | -9.316  | 5.386 | 1.00 | 0.00 |
| ATOM | 1558 | N   | GLN | 99 | -0.646 | -11.137 | 4.213 | 1.00 | 0.00 |
| ATOM | 1559 | H   | GLN | 99 | -1.195 | -11.708 | 3.586 | 1.00 | 0.00 |
| ATOM | 1560 | CA  | GLN | 99 | 0.562  | -11.699 | 4.771 | 1.00 | 0.00 |

|      |      |      |     |     |        |         |        |      |      |
|------|------|------|-----|-----|--------|---------|--------|------|------|
| ATOM | 1561 | HA   | GLN | 99  | 1.355  | -10.958 | 4.876  | 1.00 | 0.00 |
| ATOM | 1562 | CB   | GLN | 99  | 0.168  | -12.189 | 6.156  | 1.00 | 0.00 |
| ATOM | 1563 | HB2  | GLN | 99  | -0.836 | -11.837 | 6.393  | 1.00 | 0.00 |
| ATOM | 1564 | HB3  | GLN | 99  | 0.185  | -13.278 | 6.174  | 1.00 | 0.00 |
| ATOM | 1565 | CG   | GLN | 99  | 1.149  | -11.650 | 7.183  | 1.00 | 0.00 |
| ATOM | 1566 | HG2  | GLN | 99  | 1.996  | -12.333 | 7.237  | 1.00 | 0.00 |
| ATOM | 1567 | HG3  | GLN | 99  | 1.499  | -10.660 | 6.888  | 1.00 | 0.00 |
| ATOM | 1568 | CD   | GLN | 99  | 0.516  | -11.550 | 8.560  | 1.00 | 0.00 |
| ATOM | 1569 | OE1  | GLN | 99  | -0.564 | -12.031 | 8.853  | 1.00 | 0.00 |
| ATOM | 1570 | NE2  | GLN | 99  | 1.192  | -10.875 | 9.462  | 1.00 | 0.00 |
| ATOM | 1571 | HE21 | GLN | 99  | 0.821  | -10.774 | 10.396 | 1.00 | 0.00 |
| ATOM | 1572 | HE22 | GLN | 99  | 2.080  | -10.459 | 9.217  | 1.00 | 0.00 |
| ATOM | 1573 | C    | GLN | 99  | 1.131  | -12.793 | 3.870  | 1.00 | 0.00 |
| ATOM | 1574 | O    | GLN | 99  | 1.317  | -13.939 | 4.277  | 1.00 | 0.00 |
| ATOM | 1575 | N    | PRO | 100 | 1.368  | -12.470 | 2.590  | 1.00 | 0.00 |
| ATOM | 1576 | CD   | PRO | 100 | 1.219  | -11.174 | 1.958  | 1.00 | 0.00 |
| ATOM | 1577 | HD2  | PRO | 100 | 1.962  | -10.508 | 2.397  | 1.00 | 0.00 |
| ATOM | 1578 | HD3  | PRO | 100 | 0.220  | -10.808 | 2.193  | 1.00 | 0.00 |
| ATOM | 1579 | CG   | PRO | 100 | 1.425  | -11.374 | 0.475  | 1.00 | 0.00 |
| ATOM | 1580 | HG2  | PRO | 100 | 2.278  | -10.777 | 0.152  | 1.00 | 0.00 |
| ATOM | 1581 | HG3  | PRO | 100 | 0.531  | -11.043 | -0.055 | 1.00 | 0.00 |
| ATOM | 1582 | CB   | PRO | 100 | 1.669  | -12.852 | 0.254  | 1.00 | 0.00 |

|      |      |         |     |       |         |        |      |      |
|------|------|---------|-----|-------|---------|--------|------|------|
| ATOM | 1583 | HB2 PRO | 100 | 2.566 | -12.970 | -0.354 | 1.00 | 0.00 |
| ATOM | 1584 | HB3 PRO | 100 | 0.834 | -13.359 | -0.229 | 1.00 | 0.00 |
| ATOM | 1585 | CA PRO  | 100 | 1.904 | -13.444 | 1.652  | 1.00 | 0.00 |
| ATOM | 1586 | HA PRO  | 100 | 1.352 | -14.378 | 1.754  | 1.00 | 0.00 |
| ATOM | 1587 | C PRO   | 100 | 3.386 | -13.695 | 1.933  | 1.00 | 0.00 |
| ATOM | 1588 | O PRO   | 100 | 3.771 | -14.815 | 2.250  | 1.00 | 0.00 |
| ATOM | 1589 | N CYX   | 101 | 4.218 | -12.670 | 1.757  | 1.00 | 0.00 |
| ATOM | 1590 | H CYX   | 101 | 3.866 | -11.796 | 1.392  | 1.00 | 0.00 |
| ATOM | 1591 | CA CYX  | 101 | 5.633 | -12.787 | 2.000  | 1.00 | 0.00 |
| ATOM | 1592 | HA CYX  | 101 | 6.011 | -13.715 | 1.571  | 1.00 | 0.00 |
| ATOM | 1593 | CB CYX  | 101 | 6.371 | -11.615 | 1.355  | 1.00 | 0.00 |
| ATOM | 1594 | HB2 CYX | 101 | 6.386 | -10.770 | 2.044  | 1.00 | 0.00 |
| ATOM | 1595 | HB3 CYX | 101 | 7.394 | -11.912 | 1.122  | 1.00 | 0.00 |
| ATOM | 1596 | SG CYX  | 101 | 5.623 | -10.978 | -0.195 | 1.00 | 0.00 |
| ATOM | 1597 | C CYX   | 101 | 5.855 | -12.865 | 3.503  | 1.00 | 0.00 |
| ATOM | 1598 | O CYX   | 101 | 5.387 | -11.994 | 4.241  | 1.00 | 0.00 |
| ATOM | 1599 | N GLN   | 102 | 6.575 | -13.886 | 3.938  | 1.00 | 0.00 |
| ATOM | 1600 | H GLN   | 102 | 6.873 | -14.590 | 3.278  | 1.00 | 0.00 |
| ATOM | 1601 | CA GLN  | 102 | 6.895 | -14.077 | 5.343  | 1.00 | 0.00 |
| ATOM | 1602 | HA GLN  | 102 | 6.579 | -13.207 | 5.918  | 1.00 | 0.00 |
| ATOM | 1603 | CB GLN  | 102 | 6.173 | -15.310 | 5.885  | 1.00 | 0.00 |
| ATOM | 1604 | HB2 GLN | 102 | 6.494 | -16.184 | 5.318  | 1.00 | 0.00 |



|      |      |      |     |     |        |         |       |      |      |
|------|------|------|-----|-----|--------|---------|-------|------|------|
| ATOM | 1605 | HB3  | GLN | 102 | 6.438  | -15.441 | 6.934 | 1.00 | 0.00 |
| ATOM | 1606 | CG   | GLN | 102 | 4.655  | -15.148 | 5.758 | 1.00 | 0.00 |
| ATOM | 1607 | HG2  | GLN | 102 | 4.417  | -14.095 | 5.910 | 1.00 | 0.00 |
| ATOM | 1608 | HG3  | GLN | 102 | 4.315  | -15.457 | 4.769 | 1.00 | 0.00 |
| ATOM | 1609 | CD   | GLN | 102 | 3.922  | -15.966 | 6.800 | 1.00 | 0.00 |
| ATOM | 1610 | OE1  | GLN | 102 | 3.926  | -15.663 | 7.980 | 1.00 | 0.00 |
| ATOM | 1611 | NE2  | GLN | 102 | 3.303  | -17.048 | 6.386 | 1.00 | 0.00 |
| ATOM | 1612 | HE21 | GLN | 102 | 2.802  | -17.623 | 7.047 | 1.00 | 0.00 |
| ATOM | 1613 | HE22 | GLN | 102 | 3.332  | -17.299 | 5.408 | 1.00 | 0.00 |
| ATOM | 1614 | C    | GLN | 102 | 8.399  | -14.186 | 5.534 | 1.00 | 0.00 |
| ATOM | 1615 | O    | GLN | 102 | 9.161  | -14.041 | 4.573 | 1.00 | 0.00 |
| ATOM | 1616 | N    | MET | 103 | 8.813  | -14.363 | 6.787 | 1.00 | 0.00 |
| ATOM | 1617 | H    | MET | 103 | 8.135  | -14.300 | 7.533 | 1.00 | 0.00 |
| ATOM | 1618 | CA   | MET | 103 | 10.213 | -14.563 | 7.140 | 1.00 | 0.00 |
| ATOM | 1619 | HA   | MET | 103 | 10.877 | -14.164 | 6.372 | 1.00 | 0.00 |
| ATOM | 1620 | CB   | MET | 103 | 10.465 | -13.805 | 8.447 | 1.00 | 0.00 |
| ATOM | 1621 | HB2  | MET | 103 | 9.603  | -13.172 | 8.657 | 1.00 | 0.00 |
| ATOM | 1622 | HB3  | MET | 103 | 10.590 | -14.527 | 9.253 | 1.00 | 0.00 |
| ATOM | 1623 | CG   | MET | 103 | 11.720 | -12.938 | 8.342 | 1.00 | 0.00 |
| ATOM | 1624 | HG2  | MET | 103 | 12.054 | -12.930 | 7.304 | 1.00 | 0.00 |
| ATOM | 1625 | HG3  | MET | 103 | 11.471 | -11.922 | 8.650 | 1.00 | 0.00 |
| ATOM | 1626 | SD   | MET | 103 | 13.054 | -13.569 | 9.392 | 1.00 | 0.00 |

|      |      |     |     |     |        |         |        |      |      |
|------|------|-----|-----|-----|--------|---------|--------|------|------|
| ATOM | 1627 | CE  | MET | 103 | 13.371 | -12.096 | 10.376 | 1.00 | 0.00 |
| ATOM | 1628 | HE1 | MET | 103 | 12.467 | -11.819 | 10.918 | 1.00 | 0.00 |
| ATOM | 1629 | HE2 | MET | 103 | 14.172 | -12.298 | 11.086 | 1.00 | 0.00 |
| ATOM | 1630 | HE3 | MET | 103 | 13.666 | -11.276 | 9.720  | 1.00 | 0.00 |
| ATOM | 1631 | C   | MET | 103 | 10.613 | -16.049 | 7.258  | 1.00 | 0.00 |
| ATOM | 1632 | O   | MET | 103 | 9.731  | -16.814 | 7.727  | 1.00 | 0.00 |
| ATOM | 1633 | OXT | MET | 103 | 11.785 | -16.324 | 6.902  | 1.00 | 0.00 |

TER

|      |      |    |     |     |         |        |        |      |      |
|------|------|----|-----|-----|---------|--------|--------|------|------|
| ATOM | 1634 | S1 | LIG | 104 | -22.814 | 19.563 | -1.364 | 1.00 | 0.00 |
| ATOM | 1635 | S2 | LIG | 104 | -15.364 | 20.212 | 0.727  | 1.00 | 0.00 |
| ATOM | 1636 | O1 | LIG | 104 | -19.086 | 22.179 | 3.832  | 1.00 | 0.00 |
| ATOM | 1637 | H5 | LIG | 104 | -18.236 | 22.318 | 4.302  | 1.00 | 0.00 |
| ATOM | 1638 | O2 | LIG | 104 | -23.592 | 20.813 | -2.001 | 1.00 | 0.00 |
| ATOM | 1639 | H6 | LIG | 104 | -24.067 | 21.219 | -1.214 | 1.00 | 0.00 |
| ATOM | 1640 | O3 | LIG | 104 | -14.788 | 19.276 | 1.899  | 1.00 | 0.00 |
| ATOM | 1641 | H7 | LIG | 104 | -14.846 | 19.849 | 2.717  | 1.00 | 0.00 |
| ATOM | 1642 | O4 | LIG | 104 | -22.000 | 18.994 | -2.418 | 1.00 | 0.00 |
| ATOM | 1643 | O5 | LIG | 104 | -23.740 | 18.735 | -0.604 | 1.00 | 0.00 |
| ATOM | 1644 | O6 | LIG | 104 | -15.412 | 19.402 | -0.473 | 1.00 | 0.00 |
| ATOM | 1645 | O7 | LIG | 104 | -14.680 | 21.496 | 0.743  | 1.00 | 0.00 |
| ATOM | 1646 | O8 | LIG | 104 | -29.863 | 22.614 | 3.357  | 1.00 | 0.00 |
| ATOM | 1647 | O9 | LIG | 104 | -30.392 | 23.078 | 1.304  | 1.00 | 0.00 |

|      |      |     |     |     |         |        |        |      |      |
|------|------|-----|-----|-----|---------|--------|--------|------|------|
| ATOM | 1648 | N1  | LIG | 104 | -21.607 | 22.243 | 3.007  | 1.00 | 0.00 |
| ATOM | 1649 | H3  | LIG | 104 | -20.970 | 22.497 | 3.745  | 1.00 | 0.00 |
| ATOM | 1650 | H4  | LIG | 104 | -22.597 | 22.420 | 3.085  | 1.00 | 0.00 |
| ATOM | 1651 | N2  | LIG | 104 | -23.434 | 21.481 | 1.318  | 1.00 | 0.00 |
| ATOM | 1652 | N3  | LIG | 104 | -16.622 | 21.612 | 3.541  | 1.00 | 0.00 |
| ATOM | 1653 | N4  | LIG | 104 | -24.361 | 21.492 | 0.457  | 1.00 | 0.00 |
| ATOM | 1654 | N5  | LIG | 104 | -15.454 | 21.162 | 3.694  | 1.00 | 0.00 |
| ATOM | 1655 | N6  | LIG | 104 | -29.600 | 22.719 | 2.165  | 1.00 | 0.00 |
| ATOM | 1656 | C1  | LIG | 104 | -19.794 | 21.190 | 1.770  | 1.00 | 0.00 |
| ATOM | 1657 | C2  | LIG | 104 | -19.405 | 20.477 | 0.601  | 1.00 | 0.00 |
| ATOM | 1658 | C3  | LIG | 104 | -21.188 | 21.520 | 1.955  | 1.00 | 0.00 |
| ATOM | 1659 | C4  | LIG | 104 | -21.704 | 20.362 | -0.163 | 1.00 | 0.00 |
| ATOM | 1660 | C5  | LIG | 104 | -20.381 | 20.067 | -0.342 | 1.00 | 0.00 |
| ATOM | 1661 | H1  | LIG | 104 | -20.077 | 19.491 | -1.206 | 1.00 | 0.00 |
| ATOM | 1662 | C6  | LIG | 104 | -18.770 | 21.527 | 2.693  | 1.00 | 0.00 |
| ATOM | 1663 | C7  | LIG | 104 | -17.069 | 20.510 | 1.273  | 1.00 | 0.00 |
| ATOM | 1664 | C8  | LIG | 104 | -18.042 | 20.169 | 0.372  | 1.00 | 0.00 |
| ATOM | 1665 | H2  | LIG | 104 | -17.760 | 19.661 | -0.542 | 1.00 | 0.00 |
| ATOM | 1666 | C9  | LIG | 104 | -22.153 | 21.107 | 0.976  | 1.00 | 0.00 |
| ATOM | 1667 | C10 | LIG | 104 | -17.414 | 21.185 | 2.483  | 1.00 | 0.00 |
| ATOM | 1668 | C11 | LIG | 104 | -25.647 | 21.792 | 0.945  | 1.00 | 0.00 |
| ATOM | 1669 | C12 | LIG | 104 | -14.702 | 21.695 | 4.759  | 1.00 | 0.00 |

|      |      |     |     |     |         |        |        |      |      |
|------|------|-----|-----|-----|---------|--------|--------|------|------|
| ATOM | 1670 | C13 | LIG | 104 | -26.009 | 21.678 | 2.298  | 1.00 | 0.00 |
| ATOM | 1671 | H8  | LIG | 104 | -25.281 | 21.326 | 3.016  | 1.00 | 0.00 |
| ATOM | 1672 | C14 | LIG | 104 | -26.602 | 22.180 | -0.006 | 1.00 | 0.00 |
| ATOM | 1673 | H9  | LIG | 104 | -26.321 | 22.240 | -1.050 | 1.00 | 0.00 |
| ATOM | 1674 | C15 | LIG | 104 | -27.300 | 21.982 | 2.697  | 1.00 | 0.00 |
| ATOM | 1675 | H10 | LIG | 104 | -27.608 | 21.895 | 3.729  | 1.00 | 0.00 |
| ATOM | 1676 | C16 | LIG | 104 | -27.895 | 22.492 | 0.389  | 1.00 | 0.00 |
| ATOM | 1677 | H11 | LIG | 104 | -28.644 | 22.804 | -0.325 | 1.00 | 0.00 |
| ATOM | 1678 | C17 | LIG | 104 | -28.223 | 22.394 | 1.737  | 1.00 | 0.00 |
| ATOM | 1679 | C18 | LIG | 104 | -15.034 | 22.878 | 5.441  | 1.00 | 0.00 |
| ATOM | 1680 | H12 | LIG | 104 | -15.899 | 23.451 | 5.134  | 1.00 | 0.00 |
| ATOM | 1681 | C19 | LIG | 104 | -13.545 | 20.986 | 5.109  | 1.00 | 0.00 |
| ATOM | 1682 | H13 | LIG | 104 | -13.285 | 20.089 | 4.559  | 1.00 | 0.00 |
| ATOM | 1683 | C20 | LIG | 104 | -14.227 | 23.319 | 6.478  | 1.00 | 0.00 |
| ATOM | 1684 | H14 | LIG | 104 | -14.474 | 24.236 | 7.000  | 1.00 | 0.00 |
| ATOM | 1685 | C21 | LIG | 104 | -12.748 | 21.430 | 6.157  | 1.00 | 0.00 |
| ATOM | 1686 | H15 | LIG | 104 | -11.860 | 20.874 | 6.431  | 1.00 | 0.00 |
| ATOM | 1687 | C22 | LIG | 104 | -13.088 | 22.594 | 6.845  | 1.00 | 0.00 |
| ATOM | 1688 | H16 | LIG | 104 | -12.460 | 22.949 | 7.655  | 1.00 | 0.00 |
| TER  |      |     |     |     |         |        |        |      |      |
| ATOM | 1689 | S1  | LIG | 105 | 24.462  | -7.638 | 18.279 | 1.00 | 0.00 |
| ATOM | 1690 | S2  | LIG | 105 | 21.412  | -0.501 | 18.527 | 1.00 | 0.00 |

|      |      |    |     |     |        |         |        |      |      |
|------|------|----|-----|-----|--------|---------|--------|------|------|
| ATOM | 1691 | O1 | LIG | 105 | 24.411 | -1.875  | 14.468 | 1.00 | 0.00 |
| ATOM | 1692 | H5 | LIG | 105 | 24.090 | -0.968  | 14.276 | 1.00 | 0.00 |
| ATOM | 1693 | O2 | LIG | 105 | 26.001 | -7.879  | 18.666 | 1.00 | 0.00 |
| ATOM | 1694 | H6 | LIG | 105 | 26.468 | -7.876  | 17.777 | 1.00 | 0.00 |
| ATOM | 1695 | O3 | LIG | 105 | 20.171 | -0.139  | 17.573 | 1.00 | 0.00 |
| ATOM | 1696 | H7 | LIG | 105 | 20.595 | 0.301   | 16.781 | 1.00 | 0.00 |
| ATOM | 1697 | O4 | LIG | 105 | 23.734 | -7.503  | 19.524 | 1.00 | 0.00 |
| ATOM | 1698 | O5 | LIG | 105 | 24.047 | -8.600  | 17.268 | 1.00 | 0.00 |
| ATOM | 1699 | O6 | LIG | 105 | 20.877 | -1.244  | 19.649 | 1.00 | 0.00 |
| ATOM | 1700 | O7 | LIG | 105 | 22.237 | 0.680   | 18.730 | 1.00 | 0.00 |
| ATOM | 1701 | O8 | LIG | 105 | 29.700 | -10.868 | 11.691 | 1.00 | 0.00 |
| ATOM | 1702 | O9 | LIG | 105 | 30.620 | -11.649 | 13.495 | 1.00 | 0.00 |
| ATOM | 1703 | N1 | LIG | 105 | 25.710 | -4.189  | 14.498 | 1.00 | 0.00 |
| ATOM | 1704 | H3 | LIG | 105 | 25.550 | -3.335  | 13.989 | 1.00 | 0.00 |
| ATOM | 1705 | H4 | LIG | 105 | 26.301 | -4.918  | 14.129 | 1.00 | 0.00 |
| ATOM | 1706 | N2 | LIG | 105 | 26.081 | -6.538  | 15.553 | 1.00 | 0.00 |
| ATOM | 1707 | N3 | LIG | 105 | 22.842 | -0.145  | 15.479 | 1.00 | 0.00 |
| ATOM | 1708 | N4 | LIG | 105 | 26.621 | -7.545  | 16.098 | 1.00 | 0.00 |
| ATOM | 1709 | N5 | LIG | 105 | 21.900 | 0.668   | 15.679 | 1.00 | 0.00 |
| ATOM | 1710 | N6 | LIG | 105 | 29.833 | -10.919 | 12.908 | 1.00 | 0.00 |
| ATOM | 1711 | C1 | LIG | 105 | 24.128 | -3.490  | 16.212 | 1.00 | 0.00 |
| ATOM | 1712 | C2 | LIG | 105 | 23.478 | -3.811  | 17.438 | 1.00 | 0.00 |

|      |      |     |     |     |        |         |        |      |      |
|------|------|-----|-----|-----|--------|---------|--------|------|------|
| ATOM | 1713 | C3  | LIG | 105 | 25.022 | -4.459  | 15.621 | 1.00 | 0.00 |
| ATOM | 1714 | C4  | LIG | 105 | 24.511 | -6.005  | 17.475 | 1.00 | 0.00 |
| ATOM | 1715 | C5  | LIG | 105 | 23.680 | -5.079  | 18.039 | 1.00 | 0.00 |
| ATOM | 1716 | H1  | LIG | 105 | 23.149 | -5.325  | 18.950 | 1.00 | 0.00 |
| ATOM | 1717 | C6  | LIG | 105 | 23.845 | -2.221  | 15.642 | 1.00 | 0.00 |
| ATOM | 1718 | C7  | LIG | 105 | 22.369 | -1.649  | 17.497 | 1.00 | 0.00 |
| ATOM | 1719 | C8  | LIG | 105 | 22.624 | -2.870  | 18.062 | 1.00 | 0.00 |
| ATOM | 1720 | H2  | LIG | 105 | 22.170 | -3.117  | 19.013 | 1.00 | 0.00 |
| ATOM | 1721 | C9  | LIG | 105 | 25.220 | -5.728  | 16.261 | 1.00 | 0.00 |
| ATOM | 1722 | C10 | LIG | 105 | 22.961 | -1.297  | 16.247 | 1.00 | 0.00 |
| ATOM | 1723 | C11 | LIG | 105 | 27.399 | -8.356  | 15.249 | 1.00 | 0.00 |
| ATOM | 1724 | C12 | LIG | 105 | 21.892 | 1.837   | 14.894 | 1.00 | 0.00 |
| ATOM | 1725 | C13 | LIG | 105 | 27.282 | -8.348  | 13.848 | 1.00 | 0.00 |
| ATOM | 1726 | H8  | LIG | 105 | 26.549 | -7.707  | 13.378 | 1.00 | 0.00 |
| ATOM | 1727 | C14 | LIG | 105 | 28.297 | -9.234  | 15.873 | 1.00 | 0.00 |
| ATOM | 1728 | H9  | LIG | 105 | 28.362 | -9.250  | 16.954 | 1.00 | 0.00 |
| ATOM | 1729 | C15 | LIG | 105 | 28.078 | -9.185  | 13.084 | 1.00 | 0.00 |
| ATOM | 1730 | H10 | LIG | 105 | 28.003 | -9.207  | 12.006 | 1.00 | 0.00 |
| ATOM | 1731 | C16 | LIG | 105 | 29.102 | -10.069 | 15.112 | 1.00 | 0.00 |
| ATOM | 1732 | H11 | LIG | 105 | 29.808 | -10.745 | 15.571 | 1.00 | 0.00 |
| ATOM | 1733 | C17 | LIG | 105 | 28.984 | -10.028 | 13.726 | 1.00 | 0.00 |
| ATOM | 1734 | C18 | LIG | 105 | 22.996 | 2.296   | 14.156 | 1.00 | 0.00 |

|      |      |     |     |     |         |         |        |      |      |
|------|------|-----|-----|-----|---------|---------|--------|------|------|
| ATOM | 1735 | H12 | LIG | 105 | 23.931  | 1.753   | 14.195 | 1.00 | 0.00 |
| ATOM | 1736 | C19 | LIG | 105 | 20.699  | 2.573   | 14.901 | 1.00 | 0.00 |
| ATOM | 1737 | H13 | LIG | 105 | 19.863  | 2.224   | 15.495 | 1.00 | 0.00 |
| ATOM | 1738 | C20 | LIG | 105 | 22.886  | 3.461   | 13.413 | 1.00 | 0.00 |
| ATOM | 1739 | H14 | LIG | 105 | 23.738  | 3.823   | 12.850 | 1.00 | 0.00 |
| ATOM | 1740 | C21 | LIG | 105 | 20.595  | 3.734   | 14.144 | 1.00 | 0.00 |
| ATOM | 1741 | H15 | LIG | 105 | 19.669  | 4.296   | 14.144 | 1.00 | 0.00 |
| ATOM | 1742 | C22 | LIG | 105 | 21.685  | 4.179   | 13.398 | 1.00 | 0.00 |
| ATOM | 1743 | H16 | LIG | 105 | 21.609  | 5.091   | 12.817 | 1.00 | 0.00 |
| TER  |      |     |     |     |         |         |        |      |      |
| ATOM | 1744 | S1  | LIG | 106 | -26.829 | -18.788 | -3.361 | 1.00 | 0.00 |
| ATOM | 1745 | S2  | LIG | 106 | -19.973 | -15.141 | -3.362 | 1.00 | 0.00 |
| ATOM | 1746 | O1  | LIG | 106 | -20.417 | -19.782 | -5.734 | 1.00 | 0.00 |
| ATOM | 1747 | H5  | LIG | 106 | -19.499 | -19.477 | -5.898 | 1.00 | 0.00 |
| ATOM | 1748 | O2  | LIG | 106 | -27.103 | -20.005 | -2.351 | 1.00 | 0.00 |
| ATOM | 1749 | H6  | LIG | 106 | -26.908 | -20.818 | -2.908 | 1.00 | 0.00 |
| ATOM | 1750 | O3  | LIG | 106 | -19.458 | -14.428 | -4.707 | 1.00 | 0.00 |
| ATOM | 1751 | H7  | LIG | 106 | -18.856 | -15.108 | -5.126 | 1.00 | 0.00 |
| ATOM | 1752 | O4  | LIG | 106 | -26.968 | -17.567 | -2.593 | 1.00 | 0.00 |
| ATOM | 1753 | O5  | LIG | 106 | -27.577 | -18.986 | -4.594 | 1.00 | 0.00 |
| ATOM | 1754 | O6  | LIG | 106 | -20.942 | -14.250 | -2.758 | 1.00 | 0.00 |
| ATOM | 1755 | O7  | LIG | 106 | -18.837 | -15.642 | -2.605 | 1.00 | 0.00 |

|      |      |     |     |     |         |         |        |      |      |
|------|------|-----|-----|-----|---------|---------|--------|------|------|
| ATOM | 1756 | O8  | LIG | 106 | -28.518 | -26.765 | -7.207 | 1.00 | 0.00 |
| ATOM | 1757 | O9  | LIG | 106 | -29.624 | -26.860 | -5.341 | 1.00 | 0.00 |
| ATOM | 1758 | N1  | LIG | 106 | -22.654 | -21.189 | -5.494 | 1.00 | 0.00 |
| ATOM | 1759 | H3  | LIG | 106 | -21.719 | -21.177 | -5.868 | 1.00 | 0.00 |
| ATOM | 1760 | H4  | LIG | 106 | -23.277 | -21.963 | -5.663 | 1.00 | 0.00 |
| ATOM | 1761 | N2  | LIG | 106 | -25.158 | -21.318 | -4.797 | 1.00 | 0.00 |
| ATOM | 1762 | N3  | LIG | 106 | -18.970 | -17.735 | -5.291 | 1.00 | 0.00 |
| ATOM | 1763 | N4  | LIG | 106 | -26.239 | -21.669 | -4.242 | 1.00 | 0.00 |
| ATOM | 1764 | N5  | LIG | 106 | -18.239 | -16.716 | -5.418 | 1.00 | 0.00 |
| ATOM | 1765 | N6  | LIG | 106 | -28.811 | -26.342 | -6.094 | 1.00 | 0.00 |
| ATOM | 1766 | C1  | LIG | 106 | -22.358 | -18.936 | -4.618 | 1.00 | 0.00 |
| ATOM | 1767 | C2  | LIG | 106 | -22.939 | -17.847 | -3.907 | 1.00 | 0.00 |
| ATOM | 1768 | C3  | LIG | 106 | -23.164 | -20.107 | -4.881 | 1.00 | 0.00 |
| ATOM | 1769 | C4  | LIG | 106 | -25.067 | -19.002 | -3.764 | 1.00 | 0.00 |
| ATOM | 1770 | C5  | LIG | 106 | -24.296 | -17.904 | -3.503 | 1.00 | 0.00 |
| ATOM | 1771 | H1  | LIG | 106 | -24.736 | -17.053 | -2.999 | 1.00 | 0.00 |
| ATOM | 1772 | C6  | LIG | 106 | -21.009 | -18.793 | -5.033 | 1.00 | 0.00 |
| ATOM | 1773 | C7  | LIG | 106 | -20.864 | -16.585 | -4.007 | 1.00 | 0.00 |
| ATOM | 1774 | C8  | LIG | 106 | -22.167 | -16.700 | -3.603 | 1.00 | 0.00 |
| ATOM | 1775 | H2  | LIG | 106 | -22.613 | -15.899 | -3.027 | 1.00 | 0.00 |
| ATOM | 1776 | C9  | LIG | 106 | -24.530 | -20.143 | -4.445 | 1.00 | 0.00 |
| ATOM | 1777 | C10 | LIG | 106 | -20.250 | -17.630 | -4.762 | 1.00 | 0.00 |



|      |      |     |     |     |         |         |        |      |      |
|------|------|-----|-----|-----|---------|---------|--------|------|------|
| ATOM | 1778 | C11 | LIG | 106 | -26.840 | -22.835 | -4.756 | 1.00 | 0.00 |
| ATOM | 1779 | C12 | LIG | 106 | -16.936 | -16.925 | -5.908 | 1.00 | 0.00 |
| ATOM | 1780 | C13 | LIG | 106 | -26.553 | -23.359 | -6.028 | 1.00 | 0.00 |
| ATOM | 1781 | H8  | LIG | 106 | -25.848 | -22.846 | -6.669 | 1.00 | 0.00 |
| ATOM | 1782 | C14 | LIG | 106 | -27.803 | -23.451 | -3.944 | 1.00 | 0.00 |
| ATOM | 1783 | H9  | LIG | 106 | -28.036 | -23.026 | -2.976 | 1.00 | 0.00 |
| ATOM | 1784 | C15 | LIG | 106 | -27.195 | -24.505 | -6.464 | 1.00 | 0.00 |
| ATOM | 1785 | H10 | LIG | 106 | -27.000 | -24.926 | -7.441 | 1.00 | 0.00 |
| ATOM | 1786 | C16 | LIG | 106 | -28.444 | -24.604 | -4.373 | 1.00 | 0.00 |
| ATOM | 1787 | H11 | LIG | 106 | -29.181 | -25.103 | -3.760 | 1.00 | 0.00 |
| ATOM | 1788 | C17 | LIG | 106 | -28.127 | -25.118 | -5.627 | 1.00 | 0.00 |
| ATOM | 1789 | C18 | LIG | 106 | -16.308 | -18.181 | -5.962 | 1.00 | 0.00 |
| ATOM | 1790 | H12 | LIG | 106 | -16.823 | -19.055 | -5.586 | 1.00 | 0.00 |
| ATOM | 1791 | C19 | LIG | 106 | -16.248 | -15.779 | -6.332 | 1.00 | 0.00 |
| ATOM | 1792 | H13 | LIG | 106 | -16.732 | -14.812 | -6.262 | 1.00 | 0.00 |
| ATOM | 1793 | C20 | LIG | 106 | -15.020 | -18.281 | -6.465 | 1.00 | 0.00 |
| ATOM | 1794 | H14 | LIG | 106 | -14.529 | -19.247 | -6.498 | 1.00 | 0.00 |
| ATOM | 1795 | C21 | LIG | 106 | -14.961 | -15.891 | -6.844 | 1.00 | 0.00 |
| ATOM | 1796 | H15 | LIG | 106 | -14.436 | -15.005 | -7.179 | 1.00 | 0.00 |
| ATOM | 1797 | C22 | LIG | 106 | -14.346 | -17.141 | -6.914 | 1.00 | 0.00 |
| ATOM | 1798 | H16 | LIG | 106 | -13.337 | -17.227 | -7.301 | 1.00 | 0.00 |

TER

|      |      |    |     |     |        |        |         |      |      |
|------|------|----|-----|-----|--------|--------|---------|------|------|
| ATOM | 1799 | S1 | LIG | 107 | 16.417 | 11.759 | -22.398 | 1.00 | 0.00 |
| ATOM | 1800 | S2 | LIG | 107 | 22.742 | 14.676 | -18.964 | 1.00 | 0.00 |
| ATOM | 1801 | O1 | LIG | 107 | 18.124 | 17.033 | -18.274 | 1.00 | 0.00 |
| ATOM | 1802 | H5 | LIG | 107 | 18.766 | 17.523 | -17.718 | 1.00 | 0.00 |
| ATOM | 1803 | O2 | LIG | 107 | 15.831 | 12.433 | -23.731 | 1.00 | 0.00 |
| ATOM | 1804 | H6 | LIG | 107 | 15.108 | 13.039 | -23.387 | 1.00 | 0.00 |
| ATOM | 1805 | O3 | LIG | 107 | 22.948 | 14.471 | -17.383 | 1.00 | 0.00 |
| ATOM | 1806 | H7 | LIG | 107 | 22.600 | 15.319 | -16.982 | 1.00 | 0.00 |
| ATOM | 1807 | O4 | LIG | 107 | 17.556 | 10.959 | -22.799 | 1.00 | 0.00 |
| ATOM | 1808 | O5 | LIG | 107 | 15.334 | 11.181 | -21.615 | 1.00 | 0.00 |
| ATOM | 1809 | O6 | LIG | 107 | 23.125 | 13.434 | -19.603 | 1.00 | 0.00 |
| ATOM | 1810 | O7 | LIG | 107 | 23.322 | 15.946 | -19.374 | 1.00 | 0.00 |
| ATOM | 1811 | O8 | LIG | 107 | 8.080  | 15.128 | -21.747 | 1.00 | 0.00 |
| ATOM | 1812 | O9 | LIG | 107 | 8.227  | 14.545 | -23.833 | 1.00 | 0.00 |
| ATOM | 1813 | N1 | LIG | 107 | 16.008 | 16.246 | -19.668 | 1.00 | 0.00 |
| ATOM | 1814 | H3 | LIG | 107 | 16.358 | 16.912 | -18.998 | 1.00 | 0.00 |
| ATOM | 1815 | H4 | LIG | 107 | 15.039 | 16.243 | -19.950 | 1.00 | 0.00 |
| ATOM | 1816 | N2 | LIG | 107 | 14.868 | 14.490 | -21.214 | 1.00 | 0.00 |
| ATOM | 1817 | N3 | LIG | 107 | 20.572 | 16.885 | -17.595 | 1.00 | 0.00 |
| ATOM | 1818 | N4 | LIG | 107 | 14.273 | 13.947 | -22.190 | 1.00 | 0.00 |
| ATOM | 1819 | N5 | LIG | 107 | 21.646 | 16.781 | -16.942 | 1.00 | 0.00 |
| ATOM | 1820 | N6 | LIG | 107 | 8.711  | 14.755 | -22.729 | 1.00 | 0.00 |

|      |      |     |     |     |        |        |         |      |      |
|------|------|-----|-----|-----|--------|--------|---------|------|------|
| ATOM | 1821 | C1  | LIG | 107 | 18.172 | 15.133 | -19.728 | 1.00 | 0.00 |
| ATOM | 1822 | C2  | LIG | 107 | 18.954 | 14.074 | -20.271 | 1.00 | 0.00 |
| ATOM | 1823 | C3  | LIG | 107 | 16.780 | 15.234 | -20.100 | 1.00 | 0.00 |
| ATOM | 1824 | C4  | LIG | 107 | 17.037 | 13.198 | -21.470 | 1.00 | 0.00 |
| ATOM | 1825 | C5  | LIG | 107 | 18.358 | 13.116 | -21.129 | 1.00 | 0.00 |
| ATOM | 1826 | H1  | LIG | 107 | 18.954 | 12.293 | -21.503 | 1.00 | 0.00 |
| ATOM | 1827 | C6  | LIG | 107 | 18.823 | 16.028 | -18.839 | 1.00 | 0.00 |
| ATOM | 1828 | C7  | LIG | 107 | 20.940 | 14.845 | -19.099 | 1.00 | 0.00 |
| ATOM | 1829 | C8  | LIG | 107 | 20.330 | 13.967 | -19.955 | 1.00 | 0.00 |
| ATOM | 1830 | H2  | LIG | 107 | 20.918 | 13.179 | -20.408 | 1.00 | 0.00 |
| ATOM | 1831 | C9  | LIG | 107 | 16.207 | 14.260 | -20.984 | 1.00 | 0.00 |
| ATOM | 1832 | C10 | LIG | 107 | 20.188 | 15.897 | -18.493 | 1.00 | 0.00 |
| ATOM | 1833 | C11 | LIG | 107 | 12.885 | 14.174 | -22.264 | 1.00 | 0.00 |
| ATOM | 1834 | C12 | LIG | 107 | 21.984 | 17.857 | -16.099 | 1.00 | 0.00 |
| ATOM | 1835 | C13 | LIG | 107 | 12.109 | 14.590 | -21.169 | 1.00 | 0.00 |
| ATOM | 1836 | H8  | LIG | 107 | 12.579 | 14.732 | -20.205 | 1.00 | 0.00 |
| ATOM | 1837 | C14 | LIG | 107 | 12.275 | 13.919 | -23.500 | 1.00 | 0.00 |
| ATOM | 1838 | H9  | LIG | 107 | 12.877 | 13.574 | -24.331 | 1.00 | 0.00 |
| ATOM | 1839 | C15 | LIG | 107 | 10.746 | 14.781 | -21.321 | 1.00 | 0.00 |
| ATOM | 1840 | H10 | LIG | 107 | 10.123 | 15.092 | -20.495 | 1.00 | 0.00 |
| ATOM | 1841 | C16 | LIG | 107 | 10.911 | 14.115 | -23.660 | 1.00 | 0.00 |
| ATOM | 1842 | H11 | LIG | 107 | 10.421 | 13.936 | -24.607 | 1.00 | 0.00 |

|      |      |     |     |     |        |        |         |      |      |
|------|------|-----|-----|-----|--------|--------|---------|------|------|
| ATOM | 1843 | C17 | LIG | 107 | 10.166 | 14.549 | -22.568 | 1.00 | 0.00 |
| ATOM | 1844 | C18 | LIG | 107 | 21.393 | 19.129 | -16.173 | 1.00 | 0.00 |
| ATOM | 1845 | H12 | LIG | 107 | 20.649 | 19.333 | -16.931 | 1.00 | 0.00 |
| ATOM | 1846 | C19 | LIG | 107 | 22.996 | 17.607 | -15.162 | 1.00 | 0.00 |
| ATOM | 1847 | H13 | LIG | 107 | 23.463 | 16.630 | -15.132 | 1.00 | 0.00 |
| ATOM | 1848 | C20 | LIG | 107 | 21.796 | 20.122 | -15.294 | 1.00 | 0.00 |
| ATOM | 1849 | H14 | LIG | 107 | 21.350 | 21.108 | -15.354 | 1.00 | 0.00 |
| ATOM | 1850 | C21 | LIG | 107 | 23.387 | 18.607 | -14.278 | 1.00 | 0.00 |
| ATOM | 1851 | H15 | LIG | 107 | 24.162 | 18.408 | -13.550 | 1.00 | 0.00 |
| ATOM | 1852 | C22 | LIG | 107 | 22.787 | 19.864 | -14.340 | 1.00 | 0.00 |
| ATOM | 1853 | H16 | LIG | 107 | 23.099 | 20.648 | -13.660 | 1.00 | 0.00 |
| TER  |      |     |     |     |        |        |         |      |      |
| ATOM | 1854 | S1  | LIG | 108 | -8.830 | 7.305  | -21.659 | 1.00 | 0.00 |
| ATOM | 1855 | S2  | LIG | 108 | -5.888 | 14.435 | -20.756 | 1.00 | 0.00 |
| ATOM | 1856 | O1  | LIG | 108 | -2.707 | 10.291 | -20.501 | 1.00 | 0.00 |
| ATOM | 1857 | H5  | LIG | 108 | -2.133 | 11.082 | -20.418 | 1.00 | 0.00 |
| ATOM | 1858 | O2  | LIG | 108 | -9.094 | 6.367  | -20.384 | 1.00 | 0.00 |
| ATOM | 1859 | H6  | LIG | 108 | -8.270 | 5.793  | -20.342 | 1.00 | 0.00 |
| ATOM | 1860 | O3  | LIG | 108 | -5.040 | 15.096 | -21.950 | 1.00 | 0.00 |
| ATOM | 1861 | H7  | LIG | 108 | -4.089 | 14.904 | -21.707 | 1.00 | 0.00 |
| ATOM | 1862 | O4  | LIG | 108 | -9.923 | 8.253  | -21.714 | 1.00 | 0.00 |
| ATOM | 1863 | O5  | LIG | 108 | -8.486 | 6.489  | -22.815 | 1.00 | 0.00 |

|      |      |    |     |     |        |        |         |      |      |
|------|------|----|-----|-----|--------|--------|---------|------|------|
| ATOM | 1864 | O6 | LIG | 108 | -7.287 | 14.580 | -21.104 | 1.00 | 0.00 |
| ATOM | 1865 | O7 | LIG | 108 | -5.378 | 14.899 | -19.475 | 1.00 | 0.00 |
| ATOM | 1866 | O8 | LIG | 108 | -4.116 | -0.375 | -21.404 | 1.00 | 0.00 |
| ATOM | 1867 | O9 | LIG | 108 | -5.942 | -0.869 | -20.340 | 1.00 | 0.00 |
| ATOM | 1868 | N1 | LIG | 108 | -3.718 | 7.837  | -20.503 | 1.00 | 0.00 |
| ATOM | 1869 | H3 | LIG | 108 | -2.877 | 8.387  | -20.433 | 1.00 | 0.00 |
| ATOM | 1870 | H4 | LIG | 108 | -3.689 | 6.829  | -20.500 | 1.00 | 0.00 |
| ATOM | 1871 | N2 | LIG | 108 | -5.742 | 6.246  | -20.880 | 1.00 | 0.00 |
| ATOM | 1872 | N3 | LIG | 108 | -2.915 | 12.825 | -20.592 | 1.00 | 0.00 |
| ATOM | 1873 | N4 | LIG | 108 | -6.642 | 5.375  | -20.701 | 1.00 | 0.00 |
| ATOM | 1874 | N5 | LIG | 108 | -2.800 | 14.042 | -20.904 | 1.00 | 0.00 |
| ATOM | 1875 | N6 | LIG | 108 | -5.172 | -0.074 | -20.861 | 1.00 | 0.00 |
| ATOM | 1876 | C1 | LIG | 108 | -5.041 | 9.858  | -20.810 | 1.00 | 0.00 |
| ATOM | 1877 | C2 | LIG | 108 | -6.334 | 10.416 | -21.018 | 1.00 | 0.00 |
| ATOM | 1878 | C3 | LIG | 108 | -4.902 | 8.421  | -20.757 | 1.00 | 0.00 |
| ATOM | 1879 | C4 | LIG | 108 | -7.324 | 8.208  | -21.176 | 1.00 | 0.00 |
| ATOM | 1880 | C5 | LIG | 108 | -7.454 | 9.569  | -21.208 | 1.00 | 0.00 |
| ATOM | 1881 | H1 | LIG | 108 | -8.424 | 10.006 | -21.406 | 1.00 | 0.00 |
| ATOM | 1882 | C6 | LIG | 108 | -3.958 | 10.765 | -20.673 | 1.00 | 0.00 |
| ATOM | 1883 | C7 | LIG | 108 | -5.453 | 12.679 | -20.900 | 1.00 | 0.00 |
| ATOM | 1884 | C8 | LIG | 108 | -6.511 | 11.821 | -21.040 | 1.00 | 0.00 |
| ATOM | 1885 | H2 | LIG | 108 | -7.507 | 12.228 | -21.160 | 1.00 | 0.00 |

|      |      |     |     |     |        |        |         |      |      |
|------|------|-----|-----|-----|--------|--------|---------|------|------|
| ATOM | 1886 | C9  | LIG | 108 | -6.056 | 7.587  | -20.936 | 1.00 | 0.00 |
| ATOM | 1887 | C10 | LIG | 108 | -4.130 | 12.168 | -20.734 | 1.00 | 0.00 |
| ATOM | 1888 | C11 | LIG | 108 | -6.217 | 4.034  | -20.765 | 1.00 | 0.00 |
| ATOM | 1889 | C12 | LIG | 108 | -1.547 | 14.642 | -20.671 | 1.00 | 0.00 |
| ATOM | 1890 | C13 | LIG | 108 | -5.023 | 3.628  | -21.385 | 1.00 | 0.00 |
| ATOM | 1891 | H8  | LIG | 108 | -4.391 | 4.367  | -21.859 | 1.00 | 0.00 |
| ATOM | 1892 | C14 | LIG | 108 | -7.079 | 3.078  | -20.208 | 1.00 | 0.00 |
| ATOM | 1893 | H9  | LIG | 108 | -8.009 | 3.397  | -19.756 | 1.00 | 0.00 |
| ATOM | 1894 | C15 | LIG | 108 | -4.681 | 2.287  | -21.415 | 1.00 | 0.00 |
| ATOM | 1895 | H10 | LIG | 108 | -3.773 | 1.945  | -21.892 | 1.00 | 0.00 |
| ATOM | 1896 | C16 | LIG | 108 | -6.738 | 1.733  | -20.229 | 1.00 | 0.00 |
| ATOM | 1897 | H11 | LIG | 108 | -7.381 | 0.980  | -19.797 | 1.00 | 0.00 |
| ATOM | 1898 | C17 | LIG | 108 | -5.539 | 1.357  | -20.829 | 1.00 | 0.00 |
| ATOM | 1899 | C18 | LIG | 108 | -0.550 | 14.088 | -19.851 | 1.00 | 0.00 |
| ATOM | 1900 | H12 | LIG | 108 | -0.737 | 13.157 | -19.332 | 1.00 | 0.00 |
| ATOM | 1901 | C19 | LIG | 108 | -1.335 | 15.881 | -21.293 | 1.00 | 0.00 |
| ATOM | 1902 | H13 | LIG | 108 | -2.121 | 16.311 | -21.902 | 1.00 | 0.00 |
| ATOM | 1903 | C20 | LIG | 108 | 0.652  | 14.759 | -19.688 | 1.00 | 0.00 |
| ATOM | 1904 | H14 | LIG | 108 | 1.420  | 14.339 | -19.048 | 1.00 | 0.00 |
| ATOM | 1905 | C21 | LIG | 108 | -0.123 | 16.541 | -21.131 | 1.00 | 0.00 |
| ATOM | 1906 | H15 | LIG | 108 | 0.041  | 17.493 | -21.620 | 1.00 | 0.00 |
| ATOM | 1907 | C22 | LIG | 108 | 0.873  | 15.981 | -20.331 | 1.00 | 0.00 |

|      |      |     |     |     |       |        |         |      |      |
|------|------|-----|-----|-----|-------|--------|---------|------|------|
| ATOM | 1908 | H16 | LIG | 108 | 1.814 | 16.501 | -20.194 | 1.00 | 0.00 |
|------|------|-----|-----|-----|-------|--------|---------|------|------|

TER

|      |      |    |     |     |        |         |        |      |      |
|------|------|----|-----|-----|--------|---------|--------|------|------|
| ATOM | 1909 | S1 | LIG | 109 | -5.586 | -22.662 | 11.668 | 1.00 | 0.00 |
|------|------|----|-----|-----|--------|---------|--------|------|------|

|      |      |    |     |     |        |         |        |      |      |
|------|------|----|-----|-----|--------|---------|--------|------|------|
| ATOM | 1910 | S2 | LIG | 109 | -2.872 | -23.183 | 18.926 | 1.00 | 0.00 |
|------|------|----|-----|-----|--------|---------|--------|------|------|

|      |      |    |     |     |        |         |        |      |      |
|------|------|----|-----|-----|--------|---------|--------|------|------|
| ATOM | 1911 | O1 | LIG | 109 | -7.437 | -20.784 | 18.055 | 1.00 | 0.00 |
|------|------|----|-----|-----|--------|---------|--------|------|------|

|      |      |    |     |     |        |         |        |      |      |
|------|------|----|-----|-----|--------|---------|--------|------|------|
| ATOM | 1912 | H5 | LIG | 109 | -7.311 | -20.787 | 19.028 | 1.00 | 0.00 |
|------|------|----|-----|-----|--------|---------|--------|------|------|

|      |      |    |     |     |        |         |        |      |      |
|------|------|----|-----|-----|--------|---------|--------|------|------|
| ATOM | 1913 | O2 | LIG | 109 | -5.448 | -21.292 | 10.845 | 1.00 | 0.00 |
|------|------|----|-----|-----|--------|---------|--------|------|------|

|      |      |    |     |     |        |         |        |      |      |
|------|------|----|-----|-----|--------|---------|--------|------|------|
| ATOM | 1914 | H6 | LIG | 109 | -6.336 | -20.845 | 10.985 | 1.00 | 0.00 |
|------|------|----|-----|-----|--------|---------|--------|------|------|

|      |      |    |     |     |        |         |        |      |      |
|------|------|----|-----|-----|--------|---------|--------|------|------|
| ATOM | 1915 | O3 | LIG | 109 | -3.540 | -24.230 | 19.946 | 1.00 | 0.00 |
|------|------|----|-----|-----|--------|---------|--------|------|------|

|      |      |    |     |     |        |         |        |      |      |
|------|------|----|-----|-----|--------|---------|--------|------|------|
| ATOM | 1916 | H7 | LIG | 109 | -4.200 | -23.680 | 20.459 | 1.00 | 0.00 |
|------|------|----|-----|-----|--------|---------|--------|------|------|

|      |      |    |     |     |        |         |        |      |      |
|------|------|----|-----|-----|--------|---------|--------|------|------|
| ATOM | 1917 | O4 | LIG | 109 | -4.292 | -23.312 | 11.620 | 1.00 | 0.00 |
|------|------|----|-----|-----|--------|---------|--------|------|------|

|      |      |    |     |     |        |         |        |      |      |
|------|------|----|-----|-----|--------|---------|--------|------|------|
| ATOM | 1918 | O5 | LIG | 109 | -6.794 | -23.367 | 11.264 | 1.00 | 0.00 |
|------|------|----|-----|-----|--------|---------|--------|------|------|

|      |      |    |     |     |        |         |        |      |      |
|------|------|----|-----|-----|--------|---------|--------|------|------|
| ATOM | 1919 | O6 | LIG | 109 | -1.981 | -23.940 | 18.071 | 1.00 | 0.00 |
|------|------|----|-----|-----|--------|---------|--------|------|------|

|      |      |    |     |     |        |         |        |      |      |
|------|------|----|-----|-----|--------|---------|--------|------|------|
| ATOM | 1920 | O7 | LIG | 109 | -2.404 | -22.016 | 19.657 | 1.00 | 0.00 |
|------|------|----|-----|-----|--------|---------|--------|------|------|

|      |      |    |     |     |         |         |       |      |      |
|------|------|----|-----|-----|---------|---------|-------|------|------|
| ATOM | 1921 | O8 | LIG | 109 | -13.338 | -18.749 | 9.246 | 1.00 | 0.00 |
|------|------|----|-----|-----|---------|---------|-------|------|------|

|      |      |    |     |     |         |         |       |      |      |
|------|------|----|-----|-----|---------|---------|-------|------|------|
| ATOM | 1922 | O9 | LIG | 109 | -11.959 | -18.149 | 7.680 | 1.00 | 0.00 |
|------|------|----|-----|-----|---------|---------|-------|------|------|

|      |      |    |     |     |        |         |        |      |      |
|------|------|----|-----|-----|--------|---------|--------|------|------|
| ATOM | 1923 | N1 | LIG | 109 | -8.244 | -20.324 | 15.569 | 1.00 | 0.00 |
|------|------|----|-----|-----|--------|---------|--------|------|------|

|      |      |    |     |     |        |         |        |      |      |
|------|------|----|-----|-----|--------|---------|--------|------|------|
| ATOM | 1924 | H3 | LIG | 109 | -8.451 | -20.189 | 16.546 | 1.00 | 0.00 |
|------|------|----|-----|-----|--------|---------|--------|------|------|

|      |      |    |     |     |        |         |        |      |      |
|------|------|----|-----|-----|--------|---------|--------|------|------|
| ATOM | 1925 | H4 | LIG | 109 | -8.875 | -20.005 | 14.850 | 1.00 | 0.00 |
|------|------|----|-----|-----|--------|---------|--------|------|------|

|      |      |    |     |     |        |         |        |      |      |
|------|------|----|-----|-----|--------|---------|--------|------|------|
| ATOM | 1926 | N2 | LIG | 109 | -7.996 | -20.756 | 13.015 | 1.00 | 0.00 |
|------|------|----|-----|-----|--------|---------|--------|------|------|

|      |      |    |     |     |        |         |        |      |      |
|------|------|----|-----|-----|--------|---------|--------|------|------|
| ATOM | 1927 | N3 | LIG | 109 | -5.795 | -21.699 | 19.770 | 1.00 | 0.00 |
|------|------|----|-----|-----|--------|---------|--------|------|------|

|      |      |    |     |     |        |         |        |      |      |
|------|------|----|-----|-----|--------|---------|--------|------|------|
| ATOM | 1928 | N4 | LIG | 109 | -7.842 | -20.582 | 11.771 | 1.00 | 0.00 |
|------|------|----|-----|-----|--------|---------|--------|------|------|

|      |      |     |     |     |         |         |        |      |      |
|------|------|-----|-----|-----|---------|---------|--------|------|------|
| ATOM | 1929 | N5  | LIG | 109 | -5.263  | -22.321 | 20.730 | 1.00 | 0.00 |
| ATOM | 1930 | N6  | LIG | 109 | -12.214 | -18.647 | 8.768  | 1.00 | 0.00 |
| ATOM | 1931 | C1  | LIG | 109 | -6.248  | -21.595 | 16.142 | 1.00 | 0.00 |
| ATOM | 1932 | C2  | LIG | 109 | -5.120  | -22.321 | 15.667 | 1.00 | 0.00 |
| ATOM | 1933 | C3  | LIG | 109 | -7.193  | -21.068 | 15.185 | 1.00 | 0.00 |
| ATOM | 1934 | C4  | LIG | 109 | -5.856  | -22.072 | 13.370 | 1.00 | 0.00 |
| ATOM | 1935 | C5  | LIG | 109 | -4.955  | -22.553 | 14.278 | 1.00 | 0.00 |
| ATOM | 1936 | H1  | LIG | 109 | -4.115  | -23.141 | 13.933 | 1.00 | 0.00 |
| ATOM | 1937 | C6  | LIG | 109 | -6.374  | -21.440 | 17.547 | 1.00 | 0.00 |
| ATOM | 1938 | C7  | LIG | 109 | -4.293  | -22.654 | 17.929 | 1.00 | 0.00 |
| ATOM | 1939 | C8  | LIG | 109 | -4.156  | -22.820 | 16.576 | 1.00 | 0.00 |
| ATOM | 1940 | H2  | LIG | 109 | -3.284  | -23.336 | 16.194 | 1.00 | 0.00 |
| ATOM | 1941 | C9  | LIG | 109 | -6.993  | -21.304 | 13.783 | 1.00 | 0.00 |
| ATOM | 1942 | C10 | LIG | 109 | -5.430  | -21.972 | 18.458 | 1.00 | 0.00 |
| ATOM | 1943 | C11 | LIG | 109 | -8.971  | -20.111 | 11.074 | 1.00 | 0.00 |
| ATOM | 1944 | C12 | LIG | 109 | -5.650  | -21.937 | 22.028 | 1.00 | 0.00 |
| ATOM | 1945 | C13 | LIG | 109 | -10.283 | -20.211 | 11.566 | 1.00 | 0.00 |
| ATOM | 1946 | H8  | LIG | 109 | -10.460 | -20.688 | 12.521 | 1.00 | 0.00 |
| ATOM | 1947 | C14 | LIG | 109 | -8.737  | -19.557 | 9.807  | 1.00 | 0.00 |
| ATOM | 1948 | H9  | LIG | 109 | -7.725  | -19.507 | 9.425  | 1.00 | 0.00 |
| ATOM | 1949 | C15 | LIG | 109 | -11.342 | -19.732 | 10.813 | 1.00 | 0.00 |
| ATOM | 1950 | H10 | LIG | 109 | -12.363 | -19.804 | 11.163 | 1.00 | 0.00 |



|      |      |     |     |     |         |         |         |      |      |
|------|------|-----|-----|-----|---------|---------|---------|------|------|
| ATOM | 1951 | C16 | LIG | 109 | -9.794  | -19.069 | 9.052   | 1.00 | 0.00 |
| ATOM | 1952 | H11 | LIG | 109 | -9.636  | -18.629 | 8.077   | 1.00 | 0.00 |
| ATOM | 1953 | C17 | LIG | 109 | -11.082 | -19.159 | 9.569   | 1.00 | 0.00 |
| ATOM | 1954 | C18 | LIG | 109 | -6.322  | -20.740 | 22.326  | 1.00 | 0.00 |
| ATOM | 1955 | H12 | LIG | 109 | -6.544  | -20.037 | 21.535  | 1.00 | 0.00 |
| ATOM | 1956 | C19 | LIG | 109 | -5.300  | -22.821 | 23.059  | 1.00 | 0.00 |
| ATOM | 1957 | H13 | LIG | 109 | -4.759  | -23.729 | 22.820  | 1.00 | 0.00 |
| ATOM | 1958 | C20 | LIG | 109 | -6.660  | -20.455 | 23.640  | 1.00 | 0.00 |
| ATOM | 1959 | H14 | LIG | 109 | -7.169  | -19.528 | 23.876  | 1.00 | 0.00 |
| ATOM | 1960 | C21 | LIG | 109 | -5.653  | -22.531 | 24.372  | 1.00 | 0.00 |
| ATOM | 1961 | H15 | LIG | 109 | -5.388  | -23.220 | 25.164  | 1.00 | 0.00 |
| ATOM | 1962 | C22 | LIG | 109 | -6.335  | -21.351 | 24.665  | 1.00 | 0.00 |
| ATOM | 1963 | H16 | LIG | 109 | -6.599  | -21.118 | 25.690  | 1.00 | 0.00 |
| TER  |      |     |     |     |         |         |         |      |      |
| ATOM | 1964 | S1  | LIG | 110 | 4.203   | -17.880 | -18.986 | 1.00 | 0.00 |
| ATOM | 1965 | S2  | LIG | 110 | 5.490   | -10.582 | -21.307 | 1.00 | 0.00 |
| ATOM | 1966 | O1  | LIG | 110 | 9.337   | -14.107 | -21.660 | 1.00 | 0.00 |
| ATOM | 1967 | H5  | LIG | 110 | 9.689   | -13.279 | -22.051 | 1.00 | 0.00 |
| ATOM | 1968 | O2  | LIG | 110 | 4.745   | -18.388 | -17.564 | 1.00 | 0.00 |
| ATOM | 1969 | H6  | LIG | 110 | 5.614   | -18.837 | -17.792 | 1.00 | 0.00 |
| ATOM | 1970 | O3  | LIG | 110 | 5.557   | -10.253 | -22.879 | 1.00 | 0.00 |
| ATOM | 1971 | H7  | LIG | 110 | 6.535   | -10.266 | -23.087 | 1.00 | 0.00 |

|      |      |    |     |     |        |         |         |      |      |
|------|------|----|-----|-----|--------|---------|---------|------|------|
| ATOM | 1972 | O4 | LIG | 110 | 3.006  | -17.107 | -18.727 | 1.00 | 0.00 |
| ATOM | 1973 | O5 | LIG | 110 | 4.192  | -18.982 | -19.938 | 1.00 | 0.00 |
| ATOM | 1974 | O6 | LIG | 110 | 4.088  | -10.689 | -20.959 | 1.00 | 0.00 |
| ATOM | 1975 | O7 | LIG | 110 | 6.381  | -9.690  | -20.580 | 1.00 | 0.00 |
| ATOM | 1976 | O8 | LIG | 110 | 10.211 | -24.596 | -19.254 | 1.00 | 0.00 |
| ATOM | 1977 | O9 | LIG | 110 | 9.197  | -24.902 | -17.359 | 1.00 | 0.00 |
| ATOM | 1978 | N1 | LIG | 110 | 9.030  | -16.521 | -20.601 | 1.00 | 0.00 |
| ATOM | 1979 | H3 | LIG | 110 | 9.664  | -15.899 | -21.076 | 1.00 | 0.00 |
| ATOM | 1980 | H4 | LIG | 110 | 9.292  | -17.469 | -20.377 | 1.00 | 0.00 |
| ATOM | 1981 | N2 | LIG | 110 | 7.475  | -18.336 | -19.572 | 1.00 | 0.00 |
| ATOM | 1982 | N3 | LIG | 110 | 8.526  | -11.763 | -22.228 | 1.00 | 0.00 |
| ATOM | 1983 | N4 | LIG | 110 | 6.973  | -19.189 | -18.783 | 1.00 | 0.00 |
| ATOM | 1984 | N5 | LIG | 110 | 8.207  | -10.702 | -22.830 | 1.00 | 0.00 |
| ATOM | 1985 | N6 | LIG | 110 | 9.456  | -24.241 | -18.356 | 1.00 | 0.00 |
| ATOM | 1986 | C1 | LIG | 110 | 7.273  | -14.837 | -20.693 | 1.00 | 0.00 |
| ATOM | 1987 | C2 | LIG | 110 | 5.926  | -14.501 | -20.375 | 1.00 | 0.00 |
| ATOM | 1988 | C3 | LIG | 110 | 7.753  | -16.164 | -20.380 | 1.00 | 0.00 |
| ATOM | 1989 | C4 | LIG | 110 | 5.512  | -16.730 | -19.516 | 1.00 | 0.00 |
| ATOM | 1990 | C5 | LIG | 110 | 5.067  | -15.469 | -19.798 | 1.00 | 0.00 |
| ATOM | 1991 | H1 | LIG | 110 | 4.035  | -15.211 | -19.598 | 1.00 | 0.00 |
| ATOM | 1992 | C6 | LIG | 110 | 8.063  | -13.834 | -21.312 | 1.00 | 0.00 |
| ATOM | 1993 | C7 | LIG | 110 | 6.217  | -12.243 | -21.228 | 1.00 | 0.00 |

|      |      |     |     |     |        |         |         |      |      |
|------|------|-----|-----|-----|--------|---------|---------|------|------|
| ATOM | 1994 | C8  | LIG | 110 | 5.435  | -13.198 | -20.636 | 1.00 | 0.00 |
| ATOM | 1995 | H2  | LIG | 110 | 4.421  | -12.948 | -20.352 | 1.00 | 0.00 |
| ATOM | 1996 | C9  | LIG | 110 | 6.866  | -17.119 | -19.780 | 1.00 | 0.00 |
| ATOM | 1997 | C10 | LIG | 110 | 7.560  | -12.545 | -21.608 | 1.00 | 0.00 |
| ATOM | 1998 | C11 | LIG | 110 | 7.628  | -20.434 | -18.729 | 1.00 | 0.00 |
| ATOM | 1999 | C12 | LIG | 110 | 9.258  | -9.942  | -23.378 | 1.00 | 0.00 |
| ATOM | 2000 | C13 | LIG | 110 | 8.495  | -20.898 | -19.734 | 1.00 | 0.00 |
| ATOM | 2001 | H8  | LIG | 110 | 8.667  | -20.289 | -20.611 | 1.00 | 0.00 |
| ATOM | 2002 | C14 | LIG | 110 | 7.343  | -21.244 | -17.621 | 1.00 | 0.00 |
| ATOM | 2003 | H9  | LIG | 110 | 6.654  | -20.889 | -16.864 | 1.00 | 0.00 |
| ATOM | 2004 | C15 | LIG | 110 | 9.093  | -22.141 | -19.611 | 1.00 | 0.00 |
| ATOM | 2005 | H10 | LIG | 110 | 9.756  | -22.526 | -20.373 | 1.00 | 0.00 |
| ATOM | 2006 | C16 | LIG | 110 | 7.945  | -22.487 | -17.489 | 1.00 | 0.00 |
| ATOM | 2007 | H11 | LIG | 110 | 7.748  | -23.123 | -16.638 | 1.00 | 0.00 |
| ATOM | 2008 | C17 | LIG | 110 | 8.816  | -22.915 | -18.486 | 1.00 | 0.00 |
| ATOM | 2009 | C18 | LIG | 110 | 10.610 | -10.110 | -23.037 | 1.00 | 0.00 |
| ATOM | 2010 | H12 | LIG | 110 | 10.889 | -10.842 | -22.291 | 1.00 | 0.00 |
| ATOM | 2011 | C19 | LIG | 110 | 8.884  | -8.949  | -24.294 | 1.00 | 0.00 |
| ATOM | 2012 | H13 | LIG | 110 | 7.835  | -8.810  | -24.529 | 1.00 | 0.00 |
| ATOM | 2013 | C20 | LIG | 110 | 11.571 | -9.310  | -23.636 | 1.00 | 0.00 |
| ATOM | 2014 | H14 | LIG | 110 | 12.614 | -9.430  | -23.368 | 1.00 | 0.00 |
| ATOM | 2015 | C21 | LIG | 110 | 9.855  | -8.158  | -24.896 | 1.00 | 0.00 |

|      |      |     |     |     |        |        |         |      |      |
|------|------|-----|-----|-----|--------|--------|---------|------|------|
| ATOM | 2016 | H15 | LIG | 110 | 9.564  | -7.398 | -25.611 | 1.00 | 0.00 |
| ATOM | 2017 | C22 | LIG | 110 | 11.199 | -8.338 | -24.571 | 1.00 | 0.00 |
| ATOM | 2018 | H16 | LIG | 110 | 11.956 | -7.713 | -25.031 | 1.00 | 0.00 |
| TER  |      |     |     |     |        |        |         |      |      |
| ATOM | 2019 | S1  | LIG | 111 | 19.999 | 7.249  | -11.082 | 1.00 | 0.00 |
| ATOM | 2020 | S2  | LIG | 111 | 22.198 | 0.145  | -13.317 | 1.00 | 0.00 |
| ATOM | 2021 | O1  | LIG | 111 | 22.020 | 1.295  | -8.218  | 1.00 | 0.00 |
| ATOM | 2022 | H5  | LIG | 111 | 22.265 | 0.347  | -8.276  | 1.00 | 0.00 |
| ATOM | 2023 | O2  | LIG | 111 | 21.091 | 8.333  | -10.626 | 1.00 | 0.00 |
| ATOM | 2024 | H6  | LIG | 111 | 21.099 | 8.250  | -9.625  | 1.00 | 0.00 |
| ATOM | 2025 | O3  | LIG | 111 | 21.182 | -1.088 | -13.143 | 1.00 | 0.00 |
| ATOM | 2026 | H7  | LIG | 111 | 21.457 | -1.507 | -12.277 | 1.00 | 0.00 |
| ATOM | 2027 | O4  | LIG | 111 | 20.017 | 7.219  | -12.530 | 1.00 | 0.00 |
| ATOM | 2028 | O5  | LIG | 111 | 18.756 | 7.458  | -10.353 | 1.00 | 0.00 |
| ATOM | 2029 | O6  | LIG | 111 | 21.784 | 0.867  | -14.503 | 1.00 | 0.00 |
| ATOM | 2030 | O7  | LIG | 111 | 23.568 | -0.320 | -13.159 | 1.00 | 0.00 |
| ATOM | 2031 | O8  | LIG | 111 | 19.373 | 10.095 | -2.551  | 1.00 | 0.00 |
| ATOM | 2032 | O9  | LIG | 111 | 20.221 | 11.802 | -3.591  | 1.00 | 0.00 |
| ATOM | 2033 | N1  | LIG | 111 | 21.568 | 3.789  | -7.433  | 1.00 | 0.00 |
| ATOM | 2034 | H3  | LIG | 111 | 21.780 | 2.851  | -7.132  | 1.00 | 0.00 |
| ATOM | 2035 | H4  | LIG | 111 | 21.416 | 4.532  | -6.768  | 1.00 | 0.00 |
| ATOM | 2036 | N2  | LIG | 111 | 20.810 | 6.214  | -7.995  | 1.00 | 0.00 |

|      |      |     |     |     |        |        |         |      |      |
|------|------|-----|-----|-----|--------|--------|---------|------|------|
| ATOM | 2037 | N3  | LIG | 111 | 22.312 | -0.502 | -9.997  | 1.00 | 0.00 |
| ATOM | 2038 | N4  | LIG | 111 | 20.791 | 7.473  | -8.124  | 1.00 | 0.00 |
| ATOM | 2039 | N5  | LIG | 111 | 22.202 | -1.544 | -10.698 | 1.00 | 0.00 |
| ATOM | 2040 | N6  | LIG | 111 | 19.884 | 10.627 | -3.530  | 1.00 | 0.00 |
| ATOM | 2041 | C1  | LIG | 111 | 21.490 | 3.054  | -9.753  | 1.00 | 0.00 |
| ATOM | 2042 | C2  | LIG | 111 | 21.284 | 3.420  | -11.113 | 1.00 | 0.00 |
| ATOM | 2043 | C3  | LIG | 111 | 21.328 | 4.059  | -8.728  | 1.00 | 0.00 |
| ATOM | 2044 | C4  | LIG | 111 | 20.717 | 5.690  | -10.476 | 1.00 | 0.00 |
| ATOM | 2045 | C5  | LIG | 111 | 20.889 | 4.740  | -11.444 | 1.00 | 0.00 |
| ATOM | 2046 | H1  | LIG | 111 | 20.696 | 4.994  | -12.478 | 1.00 | 0.00 |
| ATOM | 2047 | C6  | LIG | 111 | 21.840 | 1.704  | -9.491  | 1.00 | 0.00 |
| ATOM | 2048 | C7  | LIG | 111 | 21.813 | 1.171  | -11.870 | 1.00 | 0.00 |
| ATOM | 2049 | C8  | LIG | 111 | 21.469 | 2.468  | -12.145 | 1.00 | 0.00 |
| ATOM | 2050 | H2  | LIG | 111 | 21.347 | 2.774  | -13.176 | 1.00 | 0.00 |
| ATOM | 2051 | C9  | LIG | 111 | 20.943 | 5.392  | -9.093  | 1.00 | 0.00 |
| ATOM | 2052 | C10 | LIG | 111 | 21.987 | 0.743  | -10.519 | 1.00 | 0.00 |
| ATOM | 2053 | C11 | LIG | 111 | 20.547 | 8.205  | -6.946  | 1.00 | 0.00 |
| ATOM | 2054 | C12 | LIG | 111 | 22.610 | -2.754 | -10.105 | 1.00 | 0.00 |
| ATOM | 2055 | C13 | LIG | 111 | 19.954 | 7.652  | -5.798  | 1.00 | 0.00 |
| ATOM | 2056 | H8  | LIG | 111 | 19.645 | 6.615  | -5.805  | 1.00 | 0.00 |
| ATOM | 2057 | C14 | LIG | 111 | 20.888 | 9.565  | -6.973  | 1.00 | 0.00 |
| ATOM | 2058 | H9  | LIG | 111 | 21.321 | 9.989  | -7.871  | 1.00 | 0.00 |

|      |      |     |     |     |        |        |         |      |      |
|------|------|-----|-----|-----|--------|--------|---------|------|------|
| ATOM | 2059 | C15 | LIG | 111 | 19.739 | 8.443  | -4.682  | 1.00 | 0.00 |
| ATOM | 2060 | H10 | LIG | 111 | 19.277 | 8.046  | -3.789  | 1.00 | 0.00 |
| ATOM | 2061 | C16 | LIG | 111 | 20.681 | 10.360 | -5.855  | 1.00 | 0.00 |
| ATOM | 2062 | H11 | LIG | 111 | 20.946 | 11.408 | -5.850  | 1.00 | 0.00 |
| ATOM | 2063 | C17 | LIG | 111 | 20.113 | 9.785  | -4.722  | 1.00 | 0.00 |
| ATOM | 2064 | C18 | LIG | 111 | 23.399 | -2.835 | -8.946  | 1.00 | 0.00 |
| ATOM | 2065 | H12 | LIG | 111 | 23.753 | -1.929 | -8.473  | 1.00 | 0.00 |
| ATOM | 2066 | C19 | LIG | 111 | 22.204 | -3.926 | -10.761 | 1.00 | 0.00 |
| ATOM | 2067 | H13 | LIG | 111 | 21.618 | -3.851 | -11.669 | 1.00 | 0.00 |
| ATOM | 2068 | C20 | LIG | 111 | 23.746 | -4.079 | -8.441  | 1.00 | 0.00 |
| ATOM | 2069 | H14 | LIG | 111 | 24.364 | -4.145 | -7.552  | 1.00 | 0.00 |
| ATOM | 2070 | C21 | LIG | 111 | 22.549 | -5.168 | -10.241 | 1.00 | 0.00 |
| ATOM | 2071 | H15 | LIG | 111 | 22.226 | -6.070 | -10.744 | 1.00 | 0.00 |
| ATOM | 2072 | C22 | LIG | 111 | 23.318 | -5.247 | -9.080  | 1.00 | 0.00 |
| ATOM | 2073 | H16 | LIG | 111 | 23.598 | -6.215 | -8.680  | 1.00 | 0.00 |

TER

|      |      |    |     |     |        |        |        |      |      |
|------|------|----|-----|-----|--------|--------|--------|------|------|
| ATOM | 2074 | S1 | LIG | 112 | 9.201  | 21.937 | 18.511 | 1.00 | 0.00 |
| ATOM | 2075 | S2 | LIG | 112 | 3.464  | 21.569 | 13.290 | 1.00 | 0.00 |
| ATOM | 2076 | O1 | LIG | 112 | 8.394  | 22.188 | 11.653 | 1.00 | 0.00 |
| ATOM | 2077 | H5 | LIG | 112 | 7.844  | 22.112 | 10.844 | 1.00 | 0.00 |
| ATOM | 2078 | O2 | LIG | 112 | 9.842  | 23.351 | 18.916 | 1.00 | 0.00 |
| ATOM | 2079 | H6 | LIG | 112 | 10.656 | 23.414 | 18.330 | 1.00 | 0.00 |

|      |      |    |     |     |        |        |        |      |      |
|------|------|----|-----|-----|--------|--------|--------|------|------|
| ATOM | 2080 | O3 | LIG | 112 | 3.273  | 20.231 | 12.419 | 1.00 | 0.00 |
| ATOM | 2081 | H7 | LIG | 112 | 3.752  | 20.429 | 11.563 | 1.00 | 0.00 |
| ATOM | 2082 | O4 | LIG | 112 | 7.947  | 21.825 | 19.227 | 1.00 | 0.00 |
| ATOM | 2083 | O5 | LIG | 112 | 10.209 | 20.889 | 18.597 | 1.00 | 0.00 |
| ATOM | 2084 | O6 | LIG | 112 | 2.887  | 21.309 | 14.592 | 1.00 | 0.00 |
| ATOM | 2085 | O7 | LIG | 112 | 3.064  | 22.727 | 12.505 | 1.00 | 0.00 |
| ATOM | 2086 | O8 | LIG | 112 | 17.954 | 22.956 | 16.610 | 1.00 | 0.00 |
| ATOM | 2087 | O9 | LIG | 112 | 17.667 | 24.214 | 18.356 | 1.00 | 0.00 |
| ATOM | 2088 | N1 | LIG | 112 | 10.333 | 22.619 | 13.412 | 1.00 | 0.00 |
| ATOM | 2089 | H3 | LIG | 112 | 10.103 | 22.545 | 12.434 | 1.00 | 0.00 |
| ATOM | 2090 | H4 | LIG | 112 | 11.283 | 22.767 | 13.718 | 1.00 | 0.00 |
| ATOM | 2091 | N2 | LIG | 112 | 11.163 | 22.629 | 15.878 | 1.00 | 0.00 |
| ATOM | 2092 | N3 | LIG | 112 | 5.969  | 21.744 | 11.019 | 1.00 | 0.00 |
| ATOM | 2093 | N4 | LIG | 112 | 11.645 | 23.000 | 16.988 | 1.00 | 0.00 |
| ATOM | 2094 | N5 | LIG | 112 | 4.909  | 21.251 | 10.546 | 1.00 | 0.00 |
| ATOM | 2095 | N6 | LIG | 112 | 17.249 | 23.527 | 17.434 | 1.00 | 0.00 |
| ATOM | 2096 | C1 | LIG | 112 | 8.029  | 22.120 | 14.018 | 1.00 | 0.00 |
| ATOM | 2097 | C2 | LIG | 112 | 7.087  | 21.929 | 15.069 | 1.00 | 0.00 |
| ATOM | 2098 | C3 | LIG | 112 | 9.411  | 22.372 | 14.357 | 1.00 | 0.00 |
| ATOM | 2099 | C4 | LIG | 112 | 8.822  | 22.169 | 16.745 | 1.00 | 0.00 |
| ATOM | 2100 | C5 | LIG | 112 | 7.513  | 21.949 | 16.420 | 1.00 | 0.00 |
| ATOM | 2101 | H1 | LIG | 112 | 6.794  | 21.762 | 17.207 | 1.00 | 0.00 |

|      |      |     |     |     |        |        |        |      |      |
|------|------|-----|-----|-----|--------|--------|--------|------|------|
| ATOM | 2102 | C6  | LIG | 112 | 7.540  | 22.042 | 12.688 | 1.00 | 0.00 |
| ATOM | 2103 | C7  | LIG | 112 | 5.267  | 21.651 | 13.480 | 1.00 | 0.00 |
| ATOM | 2104 | C8  | LIG | 112 | 5.719  | 21.716 | 14.771 | 1.00 | 0.00 |
| ATOM | 2105 | H2  | LIG | 112 | 5.010  | 21.613 | 15.583 | 1.00 | 0.00 |
| ATOM | 2106 | C9  | LIG | 112 | 9.811  | 22.402 | 15.734 | 1.00 | 0.00 |
| ATOM | 2107 | C10 | LIG | 112 | 6.180  | 21.790 | 12.391 | 1.00 | 0.00 |
| ATOM | 2108 | C11 | LIG | 112 | 13.049 | 23.100 | 17.041 | 1.00 | 0.00 |
| ATOM | 2109 | C12 | LIG | 112 | 4.755  | 21.299 | 9.148  | 1.00 | 0.00 |
| ATOM | 2110 | C13 | LIG | 112 | 13.907 | 22.459 | 16.132 | 1.00 | 0.00 |
| ATOM | 2111 | H8  | LIG | 112 | 13.489 | 21.837 | 15.352 | 1.00 | 0.00 |
| ATOM | 2112 | C14 | LIG | 112 | 13.582 | 23.853 | 18.098 | 1.00 | 0.00 |
| ATOM | 2113 | H9  | LIG | 112 | 12.914 | 24.322 | 18.809 | 1.00 | 0.00 |
| ATOM | 2114 | C15 | LIG | 112 | 15.279 | 22.600 | 16.259 | 1.00 | 0.00 |
| ATOM | 2115 | H10 | LIG | 112 | 15.963 | 22.111 | 15.580 | 1.00 | 0.00 |
| ATOM | 2116 | C16 | LIG | 112 | 14.955 | 24.003 | 18.226 | 1.00 | 0.00 |
| ATOM | 2117 | H11 | LIG | 112 | 15.388 | 24.587 | 19.026 | 1.00 | 0.00 |
| ATOM | 2118 | C17 | LIG | 112 | 15.785 | 23.377 | 17.300 | 1.00 | 0.00 |
| ATOM | 2119 | C18 | LIG | 112 | 5.523  | 22.115 | 8.300  | 1.00 | 0.00 |
| ATOM | 2120 | H12 | LIG | 112 | 6.268  | 22.777 | 8.721  | 1.00 | 0.00 |
| ATOM | 2121 | C19 | LIG | 112 | 3.742  | 20.490 | 8.613  | 1.00 | 0.00 |
| ATOM | 2122 | H13 | LIG | 112 | 3.139  | 19.885 | 9.279  | 1.00 | 0.00 |
| ATOM | 2123 | C20 | LIG | 112 | 5.292  | 22.089 | 6.933  | 1.00 | 0.00 |



|      |      |     |     |     |         |        |        |      |      |
|------|------|-----|-----|-----|---------|--------|--------|------|------|
| ATOM | 2124 | H14 | LIG | 112 | 5.876   | 22.724 | 6.277  | 1.00 | 0.00 |
| ATOM | 2125 | C21 | LIG | 112 | 3.526   | 20.463 | 7.241  | 1.00 | 0.00 |
| ATOM | 2126 | H15 | LIG | 112 | 2.750   | 19.829 | 6.831  | 1.00 | 0.00 |
| ATOM | 2127 | C22 | LIG | 112 | 4.301   | 21.259 | 6.398  | 1.00 | 0.00 |
| ATOM | 2128 | H16 | LIG | 112 | 4.125   | 21.249 | 5.329  | 1.00 | 0.00 |
| TER  |      |     |     |     |         |        |        |      |      |
| ATOM | 2129 | S1  | LIG | 113 | -21.474 | 14.187 | 14.974 | 1.00 | 0.00 |
| ATOM | 2130 | S2  | LIG | 113 | -20.512 | 15.272 | 7.345  | 1.00 | 0.00 |
| ATOM | 2131 | O1  | LIG | 113 | -18.262 | 11.156 | 9.660  | 1.00 | 0.00 |
| ATOM | 2132 | H5  | LIG | 113 | -18.063 | 11.075 | 8.703  | 1.00 | 0.00 |
| ATOM | 2133 | O2  | LIG | 113 | -20.310 | 14.584 | 16.005 | 1.00 | 0.00 |
| ATOM | 2134 | H6  | LIG | 113 | -19.826 | 13.716 | 16.156 | 1.00 | 0.00 |
| ATOM | 2135 | O3  | LIG | 113 | -21.309 | 14.337 | 6.307  | 1.00 | 0.00 |
| ATOM | 2136 | H7  | LIG | 113 | -20.650 | 13.621 | 6.073  | 1.00 | 0.00 |
| ATOM | 2137 | O4  | LIG | 113 | -22.145 | 15.417 | 14.606 | 1.00 | 0.00 |
| ATOM | 2138 | O5  | LIG | 113 | -22.225 | 13.048 | 15.484 | 1.00 | 0.00 |
| ATOM | 2139 | O6  | LIG | 113 | -21.449 | 16.272 | 7.813  | 1.00 | 0.00 |
| ATOM | 2140 | O7  | LIG | 113 | -19.226 | 15.649 | 6.779  | 1.00 | 0.00 |
| ATOM | 2141 | O8  | LIG | 113 | -18.009 | 7.389  | 19.774 | 1.00 | 0.00 |
| ATOM | 2142 | O9  | LIG | 113 | -17.777 | 9.102  | 21.087 | 1.00 | 0.00 |
| ATOM | 2143 | N1  | LIG | 113 | -18.318 | 10.923 | 12.302 | 1.00 | 0.00 |
| ATOM | 2144 | H3  | LIG | 113 | -17.978 | 10.524 | 11.442 | 1.00 | 0.00 |

|      |      |     |     |     |         |        |        |      |      |
|------|------|-----|-----|-----|---------|--------|--------|------|------|
| ATOM | 2145 | H4  | LIG | 113 | -18.146 | 10.480 | 13.192 | 1.00 | 0.00 |
| ATOM | 2146 | N2  | LIG | 113 | -19.281 | 11.675 | 14.600 | 1.00 | 0.00 |
| ATOM | 2147 | N3  | LIG | 113 | -18.828 | 12.338 | 7.478  | 1.00 | 0.00 |
| ATOM | 2148 | N4  | LIG | 113 | -19.375 | 12.099 | 15.789 | 1.00 | 0.00 |
| ATOM | 2149 | N5  | LIG | 113 | -19.245 | 12.614 | 6.320  | 1.00 | 0.00 |
| ATOM | 2150 | N6  | LIG | 113 | -18.031 | 8.592  | 20.004 | 1.00 | 0.00 |
| ATOM | 2151 | C1  | LIG | 113 | -19.479 | 12.667 | 11.062 | 1.00 | 0.00 |
| ATOM | 2152 | C2  | LIG | 113 | -20.311 | 13.821 | 11.123 | 1.00 | 0.00 |
| ATOM | 2153 | C3  | LIG | 113 | -19.147 | 11.981 | 12.290 | 1.00 | 0.00 |
| ATOM | 2154 | C4  | LIG | 113 | -20.535 | 13.603 | 13.527 | 1.00 | 0.00 |
| ATOM | 2155 | C5  | LIG | 113 | -20.832 | 14.259 | 12.366 | 1.00 | 0.00 |
| ATOM | 2156 | H1  | LIG | 113 | -21.496 | 15.114 | 12.392 | 1.00 | 0.00 |
| ATOM | 2157 | C6  | LIG | 113 | -19.030 | 12.259 | 9.779  | 1.00 | 0.00 |
| ATOM | 2158 | C7  | LIG | 113 | -20.177 | 14.129 | 8.715  | 1.00 | 0.00 |
| ATOM | 2159 | C8  | LIG | 113 | -20.626 | 14.537 | 9.942  | 1.00 | 0.00 |
| ATOM | 2160 | H2  | LIG | 113 | -21.227 | 15.435 | 10.012 | 1.00 | 0.00 |
| ATOM | 2161 | C9  | LIG | 113 | -19.675 | 12.456 | 13.536 | 1.00 | 0.00 |
| ATOM | 2162 | C10 | LIG | 113 | -19.378 | 12.952 | 8.596  | 1.00 | 0.00 |
| ATOM | 2163 | C11 | LIG | 113 | -19.040 | 11.175 | 16.797 | 1.00 | 0.00 |
| ATOM | 2164 | C12 | LIG | 113 | -18.590 | 11.988 | 5.243  | 1.00 | 0.00 |
| ATOM | 2165 | C13 | LIG | 113 | -19.009 | 9.785  | 16.595 | 1.00 | 0.00 |
| ATOM | 2166 | H8  | LIG | 113 | -19.272 | 9.381  | 15.626 | 1.00 | 0.00 |

|      |      |     |     |     |         |        |        |      |      |
|------|------|-----|-----|-----|---------|--------|--------|------|------|
| ATOM | 2167 | C14 | LIG | 113 | -18.769 | 11.706 | 18.066 | 1.00 | 0.00 |
| ATOM | 2168 | H9  | LIG | 113 | -18.820 | 12.776 | 18.218 | 1.00 | 0.00 |
| ATOM | 2169 | C15 | LIG | 113 | -18.678 | 8.941  | 17.642 | 1.00 | 0.00 |
| ATOM | 2170 | H10 | LIG | 113 | -18.656 | 7.868  | 17.518 | 1.00 | 0.00 |
| ATOM | 2171 | C16 | LIG | 113 | -18.430 | 10.866 | 19.117 | 1.00 | 0.00 |
| ATOM | 2172 | H11 | LIG | 113 | -18.207 | 11.253 | 20.101 | 1.00 | 0.00 |
| ATOM | 2173 | C17 | LIG | 113 | -18.385 | 9.494  | 18.888 | 1.00 | 0.00 |
| ATOM | 2174 | C18 | LIG | 113 | -17.344 | 11.347 | 5.346  | 1.00 | 0.00 |
| ATOM | 2175 | H12 | LIG | 113 | -16.818 | 11.342 | 6.291  | 1.00 | 0.00 |
| ATOM | 2176 | C19 | LIG | 113 | -19.243 | 12.056 | 4.004  | 1.00 | 0.00 |
| ATOM | 2177 | H13 | LIG | 113 | -20.192 | 12.575 | 3.932  | 1.00 | 0.00 |
| ATOM | 2178 | C20 | LIG | 113 | -16.783 | 10.759 | 4.223  | 1.00 | 0.00 |
| ATOM | 2179 | H14 | LIG | 113 | -15.817 | 10.272 | 4.295  | 1.00 | 0.00 |
| ATOM | 2180 | C21 | LIG | 113 | -18.678 | 11.454 | 2.887  | 1.00 | 0.00 |
| ATOM | 2181 | H15 | LIG | 113 | -19.190 | 11.500 | 1.934  | 1.00 | 0.00 |
| ATOM | 2182 | C22 | LIG | 113 | -17.449 | 10.802 | 2.993  | 1.00 | 0.00 |
| ATOM | 2183 | H16 | LIG | 113 | -17.002 | 10.343 | 2.120  | 1.00 | 0.00 |
| TER  |      |     |     |     |         |        |        |      |      |
| END  |      |     |     |     |         |        |        |      |      |

**Table O:** The number of atoms present in the system of HA-SIs

|      |   |   |     |   |       |        |        |      |      |
|------|---|---|-----|---|-------|--------|--------|------|------|
| ATOM | 1 | N | PRO | 1 | 7.519 | -4.379 | 13.831 | 1.00 | 0.00 |
|------|---|---|-----|---|-------|--------|--------|------|------|

|      |    |     |     |   |        |        |        |      |      |
|------|----|-----|-----|---|--------|--------|--------|------|------|
| ATOM | 2  | H2  | PRO | 1 | 8.006  | -3.497 | 13.905 | 1.00 | 0.00 |
| ATOM | 3  | H3  | PRO | 1 | 7.971  | -5.231 | 14.129 | 1.00 | 0.00 |
| ATOM | 4  | CD  | PRO | 1 | 6.253  | -4.334 | 14.625 | 1.00 | 0.00 |
| ATOM | 5  | HD2 | PRO | 1 | 6.187  | -3.318 | 15.016 | 1.00 | 0.00 |
| ATOM | 6  | HD3 | PRO | 1 | 6.398  | -5.031 | 15.449 | 1.00 | 0.00 |
| ATOM | 7  | CG  | PRO | 1 | 5.049  | -4.707 | 13.747 | 1.00 | 0.00 |
| ATOM | 8  | HG2 | PRO | 1 | 4.347  | -3.873 | 13.722 | 1.00 | 0.00 |
| ATOM | 9  | HG3 | PRO | 1 | 4.555  | -5.584 | 14.164 | 1.00 | 0.00 |
| ATOM | 10 | CB  | PRO | 1 | 5.609  | -5.005 | 12.360 | 1.00 | 0.00 |
| ATOM | 11 | HB2 | PRO | 1 | 5.058  | -4.537 | 11.544 | 1.00 | 0.00 |
| ATOM | 12 | HB3 | PRO | 1 | 5.629  | -6.084 | 12.212 | 1.00 | 0.00 |
| ATOM | 13 | CA  | PRO | 1 | 7.048  | -4.453 | 12.404 | 1.00 | 0.00 |
| ATOM | 14 | HA  | PRO | 1 | 7.641  | -5.213 | 11.896 | 1.00 | 0.00 |
| ATOM | 15 | C   | PRO | 1 | 7.188  | -3.112 | 11.659 | 1.00 | 0.00 |
| ATOM | 16 | O   | PRO | 1 | 6.216  | -2.507 | 11.208 | 1.00 | 0.00 |
| ATOM | 17 | N   | TYR | 2 | 8.432  | -2.677 | 11.520 | 1.00 | 0.00 |
| ATOM | 18 | H   | TYR | 2 | 9.194  | -3.227 | 11.889 | 1.00 | 0.00 |
| ATOM | 19 | CA  | TYR | 2 | 8.746  | -1.425 | 10.854 | 1.00 | 0.00 |
| ATOM | 20 | HA  | TYR | 2 | 7.870  | -0.780 | 10.791 | 1.00 | 0.00 |
| ATOM | 21 | CB  | TYR | 2 | 9.817  | -0.716 | 11.686 | 1.00 | 0.00 |
| ATOM | 22 | HB2 | TYR | 2 | 10.150 | 0.178  | 11.157 | 1.00 | 0.00 |
| ATOM | 23 | HB3 | TYR | 2 | 9.323  | -0.426 | 12.613 | 1.00 | 0.00 |

|      |    |     |     |   |        |        |        |      |      |
|------|----|-----|-----|---|--------|--------|--------|------|------|
| ATOM | 24 | CG  | TYR | 2 | 11.020 | -1.594 | 12.005 | 1.00 | 0.00 |
| ATOM | 25 | CD1 | TYR | 2 | 11.007 | -2.420 | 13.149 | 1.00 | 0.00 |
| ATOM | 26 | HD1 | TYR | 2 | 10.141 | -2.417 | 13.810 | 1.00 | 0.00 |
| ATOM | 27 | CE1 | TYR | 2 | 12.110 | -3.247 | 13.437 | 1.00 | 0.00 |
| ATOM | 28 | HE1 | TYR | 2 | 12.126 | -3.837 | 14.353 | 1.00 | 0.00 |
| ATOM | 29 | CZ  | TYR | 2 | 13.233 | -3.235 | 12.587 | 1.00 | 0.00 |
| ATOM | 30 | OH  | TYR | 2 | 14.290 | -4.055 | 12.821 | 1.00 | 0.00 |
| ATOM | 31 | HH  | TYR | 2 | 14.171 | -4.607 | 13.596 | 1.00 | 0.00 |
| ATOM | 32 | CE2 | TYR | 2 | 13.225 | -2.439 | 11.432 | 1.00 | 0.00 |
| ATOM | 33 | HE2 | TYR | 2 | 14.086 | -2.460 | 10.763 | 1.00 | 0.00 |
| ATOM | 34 | CD2 | TYR | 2 | 12.123 | -1.619 | 11.133 | 1.00 | 0.00 |
| ATOM | 35 | HD2 | TYR | 2 | 12.127 | -1.008 | 10.230 | 1.00 | 0.00 |
| ATOM | 36 | C   | TYR | 2 | 9.265  | -1.667 | 9.445  | 1.00 | 0.00 |
| ATOM | 37 | O   | TYR | 2 | 9.056  | -0.818 | 8.596  | 1.00 | 0.00 |
| ATOM | 38 | N   | GLY | 3 | 9.852  | -2.850 | 9.210  | 1.00 | 0.00 |
| ATOM | 39 | H   | GLY | 3 | 9.892  | -3.523 | 9.961  | 1.00 | 0.00 |
| ATOM | 40 | CA  | GLY | 3 | 10.430 | -3.210 | 7.936  | 1.00 | 0.00 |
| ATOM | 41 | HA2 | GLY | 3 | 10.769 | -4.245 | 7.977  | 1.00 | 0.00 |
| ATOM | 42 | HA3 | GLY | 3 | 9.673  | -3.106 | 7.158  | 1.00 | 0.00 |
| ATOM | 43 | C   | GLY | 3 | 11.616 | -2.313 | 7.597  | 1.00 | 0.00 |
| ATOM | 44 | O   | GLY | 3 | 11.565 | -1.088 | 7.601  | 1.00 | 0.00 |
| ATOM | 45 | N   | ARG | 4 | 12.756 | -2.941 | 7.347  | 1.00 | 0.00 |

|      |    |      |     |   |        |        |       |      |      |
|------|----|------|-----|---|--------|--------|-------|------|------|
| ATOM | 46 | H    | ARG | 4 | 12.828 | -3.936 | 7.499 | 1.00 | 0.00 |
| ATOM | 47 | CA   | ARG | 4 | 13.955 | -2.215 | 6.940 | 1.00 | 0.00 |
| ATOM | 48 | HA   | ARG | 4 | 13.784 | -1.139 | 6.994 | 1.00 | 0.00 |
| ATOM | 49 | CB   | ARG | 4 | 15.111 | -2.575 | 7.879 | 1.00 | 0.00 |
| ATOM | 50 | HB2  | ARG | 4 | 14.722 | -2.676 | 8.892 | 1.00 | 0.00 |
| ATOM | 51 | HB3  | ARG | 4 | 15.542 | -3.523 | 7.558 | 1.00 | 0.00 |
| ATOM | 52 | CG   | ARG | 4 | 16.195 | -1.487 | 7.854 | 1.00 | 0.00 |
| ATOM | 53 | HG2  | ARG | 4 | 16.035 | -0.849 | 6.984 | 1.00 | 0.00 |
| ATOM | 54 | HG3  | ARG | 4 | 16.115 | -0.889 | 8.761 | 1.00 | 0.00 |
| ATOM | 55 | CD   | ARG | 4 | 17.589 | -2.113 | 7.777 | 1.00 | 0.00 |
| ATOM | 56 | HD2  | ARG | 4 | 17.746 | -2.757 | 8.641 | 1.00 | 0.00 |
| ATOM | 57 | HD3  | ARG | 4 | 17.672 | -2.703 | 6.864 | 1.00 | 0.00 |
| ATOM | 58 | NE   | ARG | 4 | 18.633 | -1.078 | 7.765 | 1.00 | 0.00 |
| ATOM | 59 | HE   | ARG | 4 | 18.316 | -0.130 | 7.619 | 1.00 | 0.00 |
| ATOM | 60 | CZ   | ARG | 4 | 19.926 | -1.293 | 7.913 | 1.00 | 0.00 |
| ATOM | 61 | NH1  | ARG | 4 | 20.382 | -2.504 | 8.105 | 1.00 | 0.00 |
| ATOM | 62 | HH11 | ARG | 4 | 19.740 | -3.282 | 8.140 | 1.00 | 0.00 |
| ATOM | 63 | HH12 | ARG | 4 | 21.375 | -2.654 | 8.216 | 1.00 | 0.00 |
| ATOM | 64 | NH2  | ARG | 4 | 20.774 | -0.301 | 7.885 | 1.00 | 0.00 |
| ATOM | 65 | HH21 | ARG | 4 | 20.439 | 0.642  | 7.748 | 1.00 | 0.00 |
| ATOM | 66 | HH22 | ARG | 4 | 21.761 | -0.481 | 7.999 | 1.00 | 0.00 |
| ATOM | 67 | C    | ARG | 4 | 14.311 | -2.480 | 5.479 | 1.00 | 0.00 |

|      |    |     |     |   |        |        |       |      |      |
|------|----|-----|-----|---|--------|--------|-------|------|------|
| ATOM | 68 | O   | ARG | 4 | 15.395 | -2.111 | 5.048 | 1.00 | 0.00 |
| ATOM | 69 | N   | GLY | 5 | 13.470 | -3.256 | 4.792 | 1.00 | 0.00 |
| ATOM | 70 | H   | GLY | 5 | 12.630 | -3.594 | 5.239 | 1.00 | 0.00 |
| ATOM | 71 | CA  | GLY | 5 | 13.715 | -3.634 | 3.422 | 1.00 | 0.00 |
| ATOM | 72 | HA2 | GLY | 5 | 12.889 | -4.247 | 3.061 | 1.00 | 0.00 |
| ATOM | 73 | HA3 | GLY | 5 | 13.796 | -2.737 | 2.807 | 1.00 | 0.00 |
| ATOM | 74 | C   | GLY | 5 | 15.001 | -4.425 | 3.311 | 1.00 | 0.00 |
| ATOM | 75 | O   | GLY | 5 | 15.745 | -4.241 | 2.363 | 1.00 | 0.00 |
| ATOM | 76 | N   | ARG | 6 | 15.287 | -5.268 | 4.311 | 1.00 | 0.00 |
| ATOM | 77 | H   | ARG | 6 | 14.675 | -5.282 | 5.114 | 1.00 | 0.00 |
| ATOM | 78 | CA  | ARG | 6 | 16.479 | -6.108 | 4.334 | 1.00 | 0.00 |
| ATOM | 79 | HA  | ARG | 6 | 17.340 | -5.532 | 3.995 | 1.00 | 0.00 |
| ATOM | 80 | CB  | ARG | 6 | 16.757 | -6.616 | 5.751 | 1.00 | 0.00 |
| ATOM | 81 | HB2 | ARG | 6 | 17.521 | -7.391 | 5.698 | 1.00 | 0.00 |
| ATOM | 82 | HB3 | ARG | 6 | 17.125 | -5.784 | 6.352 | 1.00 | 0.00 |
| ATOM | 83 | CG  | ARG | 6 | 15.483 | -7.194 | 6.398 | 1.00 | 0.00 |
| ATOM | 84 | HG2 | ARG | 6 | 15.033 | -6.427 | 7.029 | 1.00 | 0.00 |
| ATOM | 85 | HG3 | ARG | 6 | 14.784 | -7.469 | 5.608 | 1.00 | 0.00 |
| ATOM | 86 | CD  | ARG | 6 | 15.807 | -8.425 | 7.244 | 1.00 | 0.00 |
| ATOM | 87 | HD2 | ARG | 6 | 16.885 | -8.489 | 7.393 | 1.00 | 0.00 |
| ATOM | 88 | HD3 | ARG | 6 | 15.311 | -8.341 | 8.211 | 1.00 | 0.00 |
| ATOM | 89 | NE  | ARG | 6 | 15.348 | -9.658 | 6.584 | 1.00 | 0.00 |

|      |     |      |     |   |        |         |       |      |      |
|------|-----|------|-----|---|--------|---------|-------|------|------|
| ATOM | 90  | HE   | ARG | 6 | 15.096 | -9.573  | 5.609 | 1.00 | 0.00 |
| ATOM | 91  | CZ   | ARG | 6 | 15.266 | -10.845 | 7.155 | 1.00 | 0.00 |
| ATOM | 92  | NH1  | ARG | 6 | 15.581 | -11.000 | 8.417 | 1.00 | 0.00 |
| ATOM | 93  | HH11 | ARG | 6 | 15.889 | -10.205 | 8.958 | 1.00 | 0.00 |
| ATOM | 94  | HH12 | ARG | 6 | 15.514 | -11.913 | 8.842 | 1.00 | 0.00 |
| ATOM | 95  | NH2  | ARG | 6 | 14.847 | -11.877 | 6.477 | 1.00 | 0.00 |
| ATOM | 96  | HH21 | ARG | 6 | 14.583 | -11.767 | 5.508 | 1.00 | 0.00 |
| ATOM | 97  | HH22 | ARG | 6 | 14.788 | -12.780 | 6.923 | 1.00 | 0.00 |
| ATOM | 98  | C    | ARG | 6 | 16.378 | -7.275  | 3.365 | 1.00 | 0.00 |
| ATOM | 99  | O    | ARG | 6 | 16.522 | -8.417  | 3.799 | 1.00 | 0.00 |
| ATOM | 100 | N    | THR | 7 | 16.040 | -7.007  | 2.120 | 1.00 | 0.00 |
| ATOM | 101 | H    | THR | 7 | 15.907 | -6.038  | 1.866 | 1.00 | 0.00 |
| ATOM | 102 | CA   | THR | 7 | 15.785 | -8.021  | 1.118 | 1.00 | 0.00 |
| ATOM | 103 | HA   | THR | 7 | 16.449 | -8.864  | 1.310 | 1.00 | 0.00 |
| ATOM | 104 | CB   | THR | 7 | 14.326 | -8.503  | 1.245 | 1.00 | 0.00 |
| ATOM | 105 | HB   | THR | 7 | 14.059 | -9.044  | 0.337 | 1.00 | 0.00 |
| ATOM | 106 | CG2  | THR | 7 | 14.145 | -9.423  | 2.461 | 1.00 | 0.00 |
| ATOM | 107 | HG21 | THR | 7 | 14.411 | -8.882  | 3.369 | 1.00 | 0.00 |
| ATOM | 108 | HG22 | THR | 7 | 13.106 | -9.745  | 2.521 | 1.00 | 0.00 |
| ATOM | 109 | HG23 | THR | 7 | 14.790 | -10.295 | 2.356 | 1.00 | 0.00 |
| ATOM | 110 | OG1  | THR | 7 | 13.453 | -7.404  | 1.460 | 1.00 | 0.00 |
| ATOM | 111 | HG1  | THR | 7 | 12.551 | -7.722  | 1.536 | 1.00 | 0.00 |



|      |     |     |     |   |        |         |        |      |      |
|------|-----|-----|-----|---|--------|---------|--------|------|------|
| ATOM | 112 | C   | THR | 7 | 16.084 | -7.465  | -0.259 | 1.00 | 0.00 |
| ATOM | 113 | O   | THR | 7 | 16.550 | -6.337  | -0.378 | 1.00 | 0.00 |
| ATOM | 114 | N   | GLU | 8 | 15.841 | -8.269  | -1.284 | 1.00 | 0.00 |
| ATOM | 115 | H   | GLU | 8 | 15.545 | -9.218  | -1.111 | 1.00 | 0.00 |
| ATOM | 116 | CA  | GLU | 8 | 16.063 | -7.856  | -2.663 | 1.00 | 0.00 |
| ATOM | 117 | HA  | GLU | 8 | 16.649 | -6.937  | -2.693 | 1.00 | 0.00 |
| ATOM | 118 | CB  | GLU | 8 | 16.834 | -8.953  | -3.408 | 1.00 | 0.00 |
| ATOM | 119 | HB2 | GLU | 8 | 16.379 | -9.918  | -3.186 | 1.00 | 0.00 |
| ATOM | 120 | HB3 | GLU | 8 | 16.774 | -8.762  | -4.480 | 1.00 | 0.00 |
| ATOM | 121 | CG  | GLU | 8 | 18.303 | -8.969  | -2.974 | 1.00 | 0.00 |
| ATOM | 122 | HG2 | GLU | 8 | 18.431 | -8.421  | -2.041 | 1.00 | 0.00 |
| ATOM | 123 | HG3 | GLU | 8 | 18.578 | -10.013 | -2.823 | 1.00 | 0.00 |
| ATOM | 124 | CD  | GLU | 8 | 19.200 | -8.357  | -4.051 | 1.00 | 0.00 |
| ATOM | 125 | OE1 | GLU | 8 | 19.506 | -9.088  | -5.020 | 1.00 | 0.00 |
| ATOM | 126 | OE2 | GLU | 8 | 19.532 | -7.159  | -3.915 | 1.00 | 0.00 |
| ATOM | 127 | C   | GLU | 8 | 14.741 | -7.527  | -3.355 | 1.00 | 0.00 |
| ATOM | 128 | O   | GLU | 8 | 13.662 | -7.525  | -2.743 | 1.00 | 0.00 |
| ATOM | 129 | N   | SER | 9 | 14.831 | -7.209  | -4.642 | 1.00 | 0.00 |
| ATOM | 130 | H   | SER | 9 | 15.746 | -7.094  | -5.054 | 1.00 | 0.00 |
| ATOM | 131 | CA  | SER | 9 | 13.668 | -6.940  | -5.466 | 1.00 | 0.00 |
| ATOM | 132 | HA  | SER | 9 | 13.046 | -6.189  | -4.979 | 1.00 | 0.00 |
| ATOM | 133 | CB  | SER | 9 | 14.072 | -6.417  | -6.853 | 1.00 | 0.00 |

|      |     |     |     |    |        |         |        |      |      |
|------|-----|-----|-----|----|--------|---------|--------|------|------|
| ATOM | 134 | HB2 | SER | 9  | 13.461 | -6.928  | -7.597 | 1.00 | 0.00 |
| ATOM | 135 | HB3 | SER | 9  | 13.863 | -5.347  | -6.884 | 1.00 | 0.00 |
| ATOM | 136 | OG  | SER | 9  | 15.439 | -6.637  | -7.136 | 1.00 | 0.00 |
| ATOM | 137 | HG  | SER | 9  | 15.644 | -6.295  | -8.010 | 1.00 | 0.00 |
| ATOM | 138 | C   | SER | 9  | 12.774 | -8.178  | -5.605 | 1.00 | 0.00 |
| ATOM | 139 | O   | SER | 9  | 13.126 | -9.297  | -5.236 | 1.00 | 0.00 |
| ATOM | 140 | N   | GLY | 10 | 11.580 | -7.985  | -6.162 | 1.00 | 0.00 |
| ATOM | 141 | H   | GLY | 10 | 11.292 | -7.055  | -6.434 | 1.00 | 0.00 |
| ATOM | 142 | CA  | GLY | 10 | 10.658 | -9.091  | -6.397 | 1.00 | 0.00 |
| ATOM | 143 | HA2 | GLY | 10 | 10.791 | -9.455  | -7.416 | 1.00 | 0.00 |
| ATOM | 144 | HA3 | GLY | 10 | 10.878 | -9.893  | -5.693 | 1.00 | 0.00 |
| ATOM | 145 | C   | GLY | 10 | 9.230  | -8.658  | -6.215 | 1.00 | 0.00 |
| ATOM | 146 | O   | GLY | 10 | 8.640  | -8.092  | -7.125 | 1.00 | 0.00 |
| ATOM | 147 | N   | CYX | 11 | 8.725  | -8.761  | -4.985 | 1.00 | 0.00 |
| ATOM | 148 | H   | CYX | 11 | 9.252  | -9.227  | -4.260 | 1.00 | 0.00 |
| ATOM | 149 | CA  | CYX | 11 | 7.400  | -8.288  | -4.671 | 1.00 | 0.00 |
| ATOM | 150 | HA  | CYX | 11 | 6.682  | -8.697  | -5.382 | 1.00 | 0.00 |
| ATOM | 151 | CB  | CYX | 11 | 7.002  | -8.725  | -3.271 | 1.00 | 0.00 |
| ATOM | 152 | HB2 | CYX | 11 | 7.620  | -8.205  | -2.539 | 1.00 | 0.00 |
| ATOM | 153 | HB3 | CYX | 11 | 5.953  | -8.483  | -3.099 | 1.00 | 0.00 |
| ATOM | 154 | SG  | CYX | 11 | 7.118  | -10.483 | -2.918 | 1.00 | 0.00 |
| ATOM | 155 | C   | CYX | 11 | 7.300  | -6.764  | -4.816 | 1.00 | 0.00 |

|      |     |     |     |    |        |        |        |      |      |
|------|-----|-----|-----|----|--------|--------|--------|------|------|
| ATOM | 156 | O   | CYX | 11 | 6.213  | -6.203 | -4.786 | 1.00 | 0.00 |
| ATOM | 157 | N   | TYR | 12 | 8.443  | -6.097 | -4.907 | 1.00 | 0.00 |
| ATOM | 158 | H   | TYR | 12 | 9.295  | -6.634 | -4.831 | 1.00 | 0.00 |
| ATOM | 159 | CA  | TYR | 12 | 8.548  | -4.679 | -5.126 | 1.00 | 0.00 |
| ATOM | 160 | HA  | TYR | 12 | 7.802  | -4.124 | -4.557 | 1.00 | 0.00 |
| ATOM | 161 | CB  | TYR | 12 | 9.931  | -4.274 | -4.639 | 1.00 | 0.00 |
| ATOM | 162 | HB2 | TYR | 12 | 10.008 | -4.604 | -3.603 | 1.00 | 0.00 |
| ATOM | 163 | HB3 | TYR | 12 | 10.668 | -4.802 | -5.244 | 1.00 | 0.00 |
| ATOM | 164 | CG  | TYR | 12 | 10.190 | -2.792 | -4.714 | 1.00 | 0.00 |
| ATOM | 165 | CD1 | TYR | 12 | 9.368  | -1.900 | -4.006 | 1.00 | 0.00 |
| ATOM | 166 | HD1 | TYR | 12 | 8.542  | -2.286 | -3.410 | 1.00 | 0.00 |
| ATOM | 167 | CE1 | TYR | 12 | 9.606  | -0.516 | -4.064 | 1.00 | 0.00 |
| ATOM | 168 | HE1 | TYR | 12 | 8.941  | 0.175  | -3.547 | 1.00 | 0.00 |
| ATOM | 169 | CZ  | TYR | 12 | 10.656 | -0.020 | -4.856 | 1.00 | 0.00 |
| ATOM | 170 | OH  | TYR | 12 | 10.921 | 1.314  | -4.872 | 1.00 | 0.00 |
| ATOM | 171 | HH  | TYR | 12 | 10.332 | 1.821  | -4.309 | 1.00 | 0.00 |
| ATOM | 172 | CE2 | TYR | 12 | 11.482 | -0.915 | -5.569 | 1.00 | 0.00 |
| ATOM | 173 | HE2 | TYR | 12 | 12.307 | -0.532 | -6.171 | 1.00 | 0.00 |
| ATOM | 174 | CD2 | TYR | 12 | 11.242 | -2.300 | -5.504 | 1.00 | 0.00 |
| ATOM | 175 | HD2 | TYR | 12 | 11.872 | -2.989 | -6.067 | 1.00 | 0.00 |
| ATOM | 176 | C   | TYR | 12 | 8.415  | -4.313 | -6.599 | 1.00 | 0.00 |
| ATOM | 177 | O   | TYR | 12 | 7.752  | -3.351 | -6.937 | 1.00 | 0.00 |

|      |     |      |     |    |        |        |         |      |      |
|------|-----|------|-----|----|--------|--------|---------|------|------|
| ATOM | 178 | N    | GLN | 13 | 9.030  | -5.103 | -7.472  | 1.00 | 0.00 |
| ATOM | 179 | H    | GLN | 13 | 9.574  | -5.893 | -7.157  | 1.00 | 0.00 |
| ATOM | 180 | CA   | GLN | 13 | 8.959  | -4.842 | -8.894  | 1.00 | 0.00 |
| ATOM | 181 | HA   | GLN | 13 | 9.329  | -3.840 | -9.115  | 1.00 | 0.00 |
| ATOM | 182 | CB   | GLN | 13 | 9.824  | -5.857 | -9.640  | 1.00 | 0.00 |
| ATOM | 183 | HB2  | GLN | 13 | 10.874 | -5.646 | -9.437  | 1.00 | 0.00 |
| ATOM | 184 | HB3  | GLN | 13 | 9.580  | -6.859 | -9.288  | 1.00 | 0.00 |
| ATOM | 185 | CG   | GLN | 13 | 9.569  | -5.770 | -11.150 | 1.00 | 0.00 |
| ATOM | 186 | HG2  | GLN | 13 | 8.533  | -6.022 | -11.376 | 1.00 | 0.00 |
| ATOM | 187 | HG3  | GLN | 13 | 9.765  | -4.740 | -11.449 | 1.00 | 0.00 |
| ATOM | 188 | CD   | GLN | 13 | 10.475 | -6.686 | -11.948 | 1.00 | 0.00 |
| ATOM | 189 | OE1  | GLN | 13 | 11.446 | -7.246 | -11.460 | 1.00 | 0.00 |
| ATOM | 190 | NE2  | GLN | 13 | 10.153 | -6.899 | -13.203 | 1.00 | 0.00 |
| ATOM | 191 | HE21 | GLN | 13 | 10.728 | -7.502 | -13.774 | 1.00 | 0.00 |
| ATOM | 192 | HE22 | GLN | 13 | 9.332  | -6.458 | -13.593 | 1.00 | 0.00 |
| ATOM | 193 | C    | GLN | 13 | 7.512  | -4.936 | -9.361  | 1.00 | 0.00 |
| ATOM | 194 | O    | GLN | 13 | 7.043  | -4.146 | -10.143 | 1.00 | 0.00 |
| ATOM | 195 | N    | GLN | 14 | 6.785  | -5.946 | -8.901  | 1.00 | 0.00 |
| ATOM | 196 | H    | GLN | 14 | 7.210  | -6.661 | -8.329  | 1.00 | 0.00 |
| ATOM | 197 | CA   | GLN | 14 | 5.384  | -6.091 | -9.259  | 1.00 | 0.00 |
| ATOM | 198 | HA   | GLN | 14 | 5.267  | -6.003 | -10.340 | 1.00 | 0.00 |
| ATOM | 199 | CB   | GLN | 14 | 4.860  | -7.460 | -8.820  | 1.00 | 0.00 |

|      |     |      |     |    |       |        |        |      |      |
|------|-----|------|-----|----|-------|--------|--------|------|------|
| ATOM | 200 | HB2  | GLN | 14 | 3.771 | -7.422 | -8.799 | 1.00 | 0.00 |
| ATOM | 201 | HB3  | GLN | 14 | 5.183 | -8.203 | -9.549 | 1.00 | 0.00 |
| ATOM | 202 | CG   | GLN | 14 | 5.382 | -7.842 | -7.440 | 1.00 | 0.00 |
| ATOM | 203 | HG2  | GLN | 14 | 6.305 | -8.401 | -7.593 | 1.00 | 0.00 |
| ATOM | 204 | HG3  | GLN | 14 | 5.599 | -6.928 | -6.887 | 1.00 | 0.00 |
| ATOM | 205 | CD   | GLN | 14 | 4.444 | -8.679 | -6.631 | 1.00 | 0.00 |
| ATOM | 206 | OE1  | GLN | 14 | 3.687 | -9.436 | -7.184 | 1.00 | 0.00 |
| ATOM | 207 | NE2  | GLN | 14 | 4.478 | -8.530 | -5.314 | 1.00 | 0.00 |
| ATOM | 208 | HE21 | GLN | 14 | 3.861 | -9.076 | -4.731 | 1.00 | 0.00 |
| ATOM | 209 | HE22 | GLN | 14 | 5.121 | -7.870 | -4.900 | 1.00 | 0.00 |
| ATOM | 210 | C    | GLN | 14 | 4.529 | -4.981 | -8.658 | 1.00 | 0.00 |
| ATOM | 211 | O    | GLN | 14 | 3.510 | -4.624 | -9.218 | 1.00 | 0.00 |
| ATOM | 212 | N    | MET | 15 | 4.923 | -4.473 | -7.496 | 1.00 | 0.00 |
| ATOM | 213 | H    | MET | 15 | 5.764 | -4.850 | -7.084 | 1.00 | 0.00 |
| ATOM | 214 | CA   | MET | 15 | 4.245 | -3.408 | -6.809 | 1.00 | 0.00 |
| ATOM | 215 | HA   | MET | 15 | 3.272 | -3.758 | -6.467 | 1.00 | 0.00 |
| ATOM | 216 | CB   | MET | 15 | 5.041 | -2.938 | -5.608 | 1.00 | 0.00 |
| ATOM | 217 | HB2  | MET | 15 | 5.970 | -3.506 | -5.563 | 1.00 | 0.00 |
| ATOM | 218 | HB3  | MET | 15 | 5.270 | -1.879 | -5.736 | 1.00 | 0.00 |
| ATOM | 219 | CG   | MET | 15 | 4.272 | -3.134 | -4.334 | 1.00 | 0.00 |
| ATOM | 220 | HG2  | MET | 15 | 3.263 | -2.739 | -4.451 | 1.00 | 0.00 |
| ATOM | 221 | HG3  | MET | 15 | 4.221 | -4.196 | -4.097 | 1.00 | 0.00 |

|      |     |     |     |    |       |        |         |      |      |
|------|-----|-----|-----|----|-------|--------|---------|------|------|
| ATOM | 222 | SD  | MET | 15 | 5.092 | -2.269 | -2.994  | 1.00 | 0.00 |
| ATOM | 223 | CE  | MET | 15 | 5.931 | -3.647 | -2.261  | 1.00 | 0.00 |
| ATOM | 224 | HE1 | MET | 15 | 6.605 | -4.093 | -2.992  | 1.00 | 0.00 |
| ATOM | 225 | HE2 | MET | 15 | 6.505 | -3.307 | -1.399  | 1.00 | 0.00 |
| ATOM | 226 | HE3 | MET | 15 | 5.200 | -4.389 | -1.941  | 1.00 | 0.00 |
| ATOM | 227 | C   | MET | 15 | 4.071 | -2.219 | -7.709  | 1.00 | 0.00 |
| ATOM | 228 | O   | MET | 15 | 2.969 | -1.722 | -7.761  | 1.00 | 0.00 |
| ATOM | 229 | N   | GLU | 16 | 5.123 | -1.745 | -8.368  | 1.00 | 0.00 |
| ATOM | 230 | H   | GLU | 16 | 6.034 | -2.147 | -8.198  | 1.00 | 0.00 |
| ATOM | 231 | CA  | GLU | 16 | 5.025 | -0.619 | -9.293  | 1.00 | 0.00 |
| ATOM | 232 | HA  | GLU | 16 | 4.770 | 0.293  | -8.754  | 1.00 | 0.00 |
| ATOM | 233 | CB  | GLU | 16 | 6.377 | -0.413 | -9.993  | 1.00 | 0.00 |
| ATOM | 234 | HB2 | GLU | 16 | 6.478 | 0.645  | -10.239 | 1.00 | 0.00 |
| ATOM | 235 | HB3 | GLU | 16 | 7.169 | -0.702 | -9.302  | 1.00 | 0.00 |
| ATOM | 236 | CG  | GLU | 16 | 6.488 | -1.249 | -11.277 | 1.00 | 0.00 |
| ATOM | 237 | HG2 | GLU | 16 | 6.114 | -2.233 | -10.997 | 1.00 | 0.00 |
| ATOM | 238 | HG3 | GLU | 16 | 5.869 | -0.840 | -12.076 | 1.00 | 0.00 |
| ATOM | 239 | CD  | GLU | 16 | 7.930 | -1.372 | -11.763 | 1.00 | 0.00 |
| ATOM | 240 | OE1 | GLU | 16 | 8.773 | -1.939 | -11.026 | 1.00 | 0.00 |
| ATOM | 241 | OE2 | GLU | 16 | 8.230 | -0.826 | -12.845 | 1.00 | 0.00 |
| ATOM | 242 | C   | GLU | 16 | 3.909 | -0.837 | -10.324 | 1.00 | 0.00 |
| ATOM | 243 | O   | GLU | 16 | 3.226 | 0.108  | -10.709 | 1.00 | 0.00 |

|      |     |     |     |    |        |        |         |      |      |
|------|-----|-----|-----|----|--------|--------|---------|------|------|
| ATOM | 244 | N   | GLU | 17 | 3.695  | -2.102 | -10.702 | 1.00 | 0.00 |
| ATOM | 245 | H   | GLU | 17 | 4.275  | -2.835 | -10.321 | 1.00 | 0.00 |
| ATOM | 246 | CA  | GLU | 17 | 2.682  | -2.461 | -11.662 | 1.00 | 0.00 |
| ATOM | 247 | HA  | GLU | 17 | 2.679  | -1.743 | -12.483 | 1.00 | 0.00 |
| ATOM | 248 | CB  | GLU | 17 | 2.959  | -3.858 | -12.233 | 1.00 | 0.00 |
| ATOM | 249 | HB2 | GLU | 17 | 3.994  | -4.134 | -12.031 | 1.00 | 0.00 |
| ATOM | 250 | HB3 | GLU | 17 | 2.292  | -4.581 | -11.765 | 1.00 | 0.00 |
| ATOM | 251 | CG  | GLU | 17 | 2.720  | -3.849 | -13.746 | 1.00 | 0.00 |
| ATOM | 252 | HG2 | GLU | 17 | 2.130  | -4.725 | -14.014 | 1.00 | 0.00 |
| ATOM | 253 | HG3 | GLU | 17 | 2.167  | -2.946 | -14.006 | 1.00 | 0.00 |
| ATOM | 254 | CD  | GLU | 17 | 4.045  | -3.873 | -14.512 | 1.00 | 0.00 |
| ATOM | 255 | OE1 | GLU | 17 | 4.933  | -3.069 | -14.177 | 1.00 | 0.00 |
| ATOM | 256 | OE2 | GLU | 17 | 4.156  | -4.709 | -15.436 | 1.00 | 0.00 |
| ATOM | 257 | C   | GLU | 17 | 1.308  | -2.431 | -11.001 | 1.00 | 0.00 |
| ATOM | 258 | O   | GLU | 17 | 0.295  | -2.192 | -11.658 | 1.00 | 0.00 |
| ATOM | 259 | N   | ALA | 18 | 1.248  | -2.692 | -9.697  | 1.00 | 0.00 |
| ATOM | 260 | H   | ALA | 18 | 2.090  | -3.006 | -9.236  | 1.00 | 0.00 |
| ATOM | 261 | CA  | ALA | 18 | 0.036  | -2.630 | -8.932  | 1.00 | 0.00 |
| ATOM | 262 | HA  | ALA | 18 | -0.808 | -2.277 | -9.525  | 1.00 | 0.00 |
| ATOM | 263 | CB  | ALA | 18 | -0.266 | -4.042 | -8.445  | 1.00 | 0.00 |
| ATOM | 264 | HB1 | ALA | 18 | 0.567  | -4.404 | -7.843  | 1.00 | 0.00 |
| ATOM | 265 | HB2 | ALA | 18 | -1.174 | -4.032 | -7.842  | 1.00 | 0.00 |

|      |     |     |     |    |        |        |        |      |      |
|------|-----|-----|-----|----|--------|--------|--------|------|------|
| ATOM | 266 | HB3 | ALA | 18 | -0.407 | -4.700 | -9.303 | 1.00 | 0.00 |
| ATOM | 267 | C   | ALA | 18 | 0.205  | -1.619 | -7.823 | 1.00 | 0.00 |
| ATOM | 268 | O   | ALA | 18 | 0.299  | -2.019 | -6.676 | 1.00 | 0.00 |
| ATOM | 269 | N   | GLU | 19 | 0.324  | -0.330 | -8.116 | 1.00 | 0.00 |
| ATOM | 270 | H   | GLU | 19 | 0.379  | -0.074 | -9.092 | 1.00 | 0.00 |
| ATOM | 271 | CA  | GLU | 19 | 0.495  | 0.715  | -7.119 | 1.00 | 0.00 |
| ATOM | 272 | HA  | GLU | 19 | 1.290  | 0.443  | -6.426 | 1.00 | 0.00 |
| ATOM | 273 | CB  | GLU | 19 | 0.871  | 2.034  | -7.800 | 1.00 | 0.00 |
| ATOM | 274 | HB2 | GLU | 19 | 1.918  | 1.985  | -8.101 | 1.00 | 0.00 |
| ATOM | 275 | HB3 | GLU | 19 | 0.246  | 2.160  | -8.684 | 1.00 | 0.00 |
| ATOM | 276 | CG  | GLU | 19 | 0.668  | 3.216  | -6.863 | 1.00 | 0.00 |
| ATOM | 277 | HG2 | GLU | 19 | 0.478  | 2.942  | -5.826 | 1.00 | 0.00 |
| ATOM | 278 | HG3 | GLU | 19 | 1.604  | 3.772  | -6.927 | 1.00 | 0.00 |
| ATOM | 279 | CD  | GLU | 19 | -0.504 | 4.107  | -7.389 | 1.00 | 0.00 |
| ATOM | 280 | OE1 | GLU | 19 | -1.486 | 3.718  | -8.066 | 1.00 | 0.00 |
| ATOM | 281 | OE2 | GLU | 19 | -0.527 | 5.285  | -7.015 | 1.00 | 0.00 |
| ATOM | 282 | C   | GLU | 19 | -0.804 | 0.776  | -6.266 | 1.00 | 0.00 |
| ATOM | 283 | O   | GLU | 19 | -1.646 | 1.667  | -6.249 | 1.00 | 0.00 |
| ATOM | 284 | N   | MET | 20 | -1.028 | -0.180 | -5.410 | 1.00 | 0.00 |
| ATOM | 285 | H   | MET | 20 | -0.359 | -0.931 | -5.317 | 1.00 | 0.00 |
| ATOM | 286 | CA  | MET | 20 | -2.220 | -0.221 | -4.600 | 1.00 | 0.00 |
| ATOM | 287 | HA  | MET | 20 | -3.000 | 0.410  | -5.028 | 1.00 | 0.00 |



|      |     |     |     |    |        |        |        |      |      |
|------|-----|-----|-----|----|--------|--------|--------|------|------|
| ATOM | 288 | CB  | MET | 20 | -2.721 | -1.645 | -4.555 | 1.00 | 0.00 |
| ATOM | 289 | HB2 | MET | 20 | -3.791 | -1.607 | -4.351 | 1.00 | 0.00 |
| ATOM | 290 | HB3 | MET | 20 | -2.554 | -2.080 | -5.541 | 1.00 | 0.00 |
| ATOM | 291 | CG  | MET | 20 | -2.041 | -2.490 | -3.512 | 1.00 | 0.00 |
| ATOM | 292 | HG2 | MET | 20 | -1.055 | -2.054 | -3.348 | 1.00 | 0.00 |
| ATOM | 293 | HG3 | MET | 20 | -2.633 | -2.402 | -2.601 | 1.00 | 0.00 |
| ATOM | 294 | SD  | MET | 20 | -1.860 | -4.197 | -3.924 | 1.00 | 0.00 |
| ATOM | 295 | CE  | MET | 20 | -0.591 | -4.115 | -5.145 | 1.00 | 0.00 |
| ATOM | 296 | HE1 | MET | 20 | 0.306  | -3.675 | -4.709 | 1.00 | 0.00 |
| ATOM | 297 | HE2 | MET | 20 | -0.365 | -5.119 | -5.504 | 1.00 | 0.00 |
| ATOM | 298 | HE3 | MET | 20 | -0.928 | -3.499 | -5.980 | 1.00 | 0.00 |
| ATOM | 299 | C   | MET | 20 | -1.873 | 0.287  | -3.229 | 1.00 | 0.00 |
| ATOM | 300 | O   | MET | 20 | -2.767 | 0.622  | -2.453 | 1.00 | 0.00 |
| ATOM | 301 | N   | LEU | 21 | -0.573 | 0.307  | -2.912 | 1.00 | 0.00 |
| ATOM | 302 | H   | LEU | 21 | 0.099  | -0.074 | -3.563 | 1.00 | 0.00 |
| ATOM | 303 | CA  | LEU | 21 | -0.101 | 0.748  | -1.623 | 1.00 | 0.00 |
| ATOM | 304 | HA  | LEU | 21 | -0.852 | 0.551  | -0.859 | 1.00 | 0.00 |
| ATOM | 305 | CB  | LEU | 21 | 1.169  | -0.004 | -1.262 | 1.00 | 0.00 |
| ATOM | 306 | HB2 | LEU | 21 | 1.836  | 0.352  | -2.048 | 1.00 | 0.00 |
| ATOM | 307 | HB3 | LEU | 21 | 1.554  | 0.307  | -0.291 | 1.00 | 0.00 |
| ATOM | 308 | CG  | LEU | 21 | 1.089  | -1.543 | -1.314 | 1.00 | 0.00 |
| ATOM | 309 | HG  | LEU | 21 | 1.857  | -1.931 | -0.645 | 1.00 | 0.00 |

|      |     |          |    |        |        |        |      |      |
|------|-----|----------|----|--------|--------|--------|------|------|
| ATOM | 310 | CD1 LEU  | 21 | -0.263 | -2.097 | -0.908 | 1.00 | 0.00 |
| ATOM | 311 | HD11 LEU | 21 | -1.031 | -1.709 | -1.578 | 1.00 | 0.00 |
| ATOM | 312 | HD12 LEU | 21 | -0.243 | -3.185 | -0.970 | 1.00 | 0.00 |
| ATOM | 313 | HD13 LEU | 21 | -0.488 | -1.795 | 0.114  | 1.00 | 0.00 |
| ATOM | 314 | CD2 LEU  | 21 | 1.539  | -2.032 | -2.678 | 1.00 | 0.00 |
| ATOM | 315 | HD21 LEU | 21 | 2.567  | -1.717 | -2.857 | 1.00 | 0.00 |
| ATOM | 316 | HD22 LEU | 21 | 1.482  | -3.120 | -2.712 | 1.00 | 0.00 |
| ATOM | 317 | HD23 LEU | 21 | 0.892  | -1.610 | -3.448 | 1.00 | 0.00 |
| ATOM | 318 | C LEU    | 21 | 0.063  | 2.256  | -1.627 | 1.00 | 0.00 |
| ATOM | 319 | O LEU    | 21 | 0.635  | 2.824  | -0.710 | 1.00 | 0.00 |
| ATOM | 320 | N ASN    | 22 | -0.511 | 2.899  | -2.642 | 1.00 | 0.00 |
| ATOM | 321 | H ASN    | 22 | -1.008 | 2.373  | -3.347 | 1.00 | 0.00 |
| ATOM | 322 | CA ASN   | 22 | -0.482 | 4.331  | -2.755 | 1.00 | 0.00 |
| ATOM | 323 | HA ASN   | 22 | 0.309  | 4.739  | -2.126 | 1.00 | 0.00 |
| ATOM | 324 | CB ASN   | 22 | -0.216 | 4.735  | -4.188 | 1.00 | 0.00 |
| ATOM | 325 | HB2 ASN  | 22 | 0.730  | 4.474  | -4.662 | 1.00 | 0.00 |
| ATOM | 326 | HB3 ASN  | 22 | -1.020 | 4.156  | -4.641 | 1.00 | 0.00 |
| ATOM | 327 | CG ASN   | 22 | -0.489 | 6.218  | -4.428 | 1.00 | 0.00 |
| ATOM | 328 | OD1 ASN  | 22 | -1.576 | 6.653  | -4.792 | 1.00 | 0.00 |
| ATOM | 329 | ND2 ASN  | 22 | 0.419  | 7.031  | -3.938 | 1.00 | 0.00 |
| ATOM | 330 | HD21 ASN | 22 | 0.314  | 8.029  | -4.054 | 1.00 | 0.00 |
| ATOM | 331 | HD22 ASN | 22 | 1.218  | 6.655  | -3.449 | 1.00 | 0.00 |

|      |     |     |     |    |        |       |        |      |      |
|------|-----|-----|-----|----|--------|-------|--------|------|------|
| ATOM | 332 | C   | ASN | 22 | -1.827 | 4.893 | -2.361 | 1.00 | 0.00 |
| ATOM | 333 | O   | ASN | 22 | -1.881 | 5.910 | -1.698 | 1.00 | 0.00 |
| ATOM | 334 | N   | HIE | 23 | -2.925 | 4.216 | -2.709 | 1.00 | 0.00 |
| ATOM | 335 | H   | HIE | 23 | -2.825 | 3.362 | -3.238 | 1.00 | 0.00 |
| ATOM | 336 | CA  | HIE | 23 | -4.261 | 4.678 | -2.396 | 1.00 | 0.00 |
| ATOM | 337 | HA  | HIE | 23 | -4.367 | 5.732 | -2.655 | 1.00 | 0.00 |
| ATOM | 338 | CB  | HIE | 23 | -5.277 | 3.875 | -3.199 | 1.00 | 0.00 |
| ATOM | 339 | HB2 | HIE | 23 | -5.104 | 2.806 | -3.081 | 1.00 | 0.00 |
| ATOM | 340 | HB3 | HIE | 23 | -6.284 | 4.120 | -2.861 | 1.00 | 0.00 |
| ATOM | 341 | CG  | HIE | 23 | -5.240 | 4.156 | -4.674 | 1.00 | 0.00 |
| ATOM | 342 | ND1 | HIE | 23 | -6.199 | 4.871 | -5.365 | 1.00 | 0.00 |
| ATOM | 343 | CE1 | HIE | 23 | -5.830 | 4.905 | -6.666 | 1.00 | 0.00 |
| ATOM | 344 | HE1 | HIE | 23 | -6.451 | 5.428 | -7.393 | 1.00 | 0.00 |
| ATOM | 345 | NE2 | HIE | 23 | -4.666 | 4.226 | -6.816 | 1.00 | 0.00 |
| ATOM | 346 | HE2 | HIE | 23 | -4.153 | 4.082 | -7.675 | 1.00 | 0.00 |
| ATOM | 347 | CD2 | HIE | 23 | -4.284 | 3.752 | -5.574 | 1.00 | 0.00 |
| ATOM | 348 | HD2 | HIE | 23 | -3.365 | 3.175 | -5.470 | 1.00 | 0.00 |
| ATOM | 349 | C   | HIE | 23 | -4.503 | 4.535 | -0.907 | 1.00 | 0.00 |
| ATOM | 350 | O   | HIE | 23 | -4.760 | 5.542 | -0.252 | 1.00 | 0.00 |
| ATOM | 351 | N   | CYX | 24 | -4.435 | 3.297 | -0.393 | 1.00 | 0.00 |
| ATOM | 352 | H   | CYX | 24 | -4.305 | 2.500 | -1.000 | 1.00 | 0.00 |
| ATOM | 353 | CA  | CYX | 24 | -4.578 | 3.060 | 1.038  | 1.00 | 0.00 |

|      |     |     |     |    |        |       |        |      |      |
|------|-----|-----|-----|----|--------|-------|--------|------|------|
| ATOM | 354 | HA  | CYX | 24 | -5.577 | 3.358 | 1.356  | 1.00 | 0.00 |
| ATOM | 355 | CB  | CYX | 24 | -4.376 | 1.586 | 1.379  | 1.00 | 0.00 |
| ATOM | 356 | HB2 | CYX | 24 | -3.966 | 1.066 | 0.513  | 1.00 | 0.00 |
| ATOM | 357 | HB3 | CYX | 24 | -3.684 | 1.498 | 2.216  | 1.00 | 0.00 |
| ATOM | 358 | SG  | CYX | 24 | -5.875 | 0.717 | 1.841  | 1.00 | 0.00 |
| ATOM | 359 | C   | CYX | 24 | -3.569 | 3.903 | 1.806  | 1.00 | 0.00 |
| ATOM | 360 | O   | CYX | 24 | -3.893 | 4.336 | 2.890  | 1.00 | 0.00 |
| ATOM | 361 | N   | GLY | 25 | -2.426 | 4.230 | 1.200  | 1.00 | 0.00 |
| ATOM | 362 | H   | GLY | 25 | -2.255 | 3.857 | 0.277  | 1.00 | 0.00 |
| ATOM | 363 | CA  | GLY | 25 | -1.427 | 5.082 | 1.787  | 1.00 | 0.00 |
| ATOM | 364 | HA2 | GLY | 25 | -1.237 | 4.753 | 2.808  | 1.00 | 0.00 |
| ATOM | 365 | HA3 | GLY | 25 | -0.509 | 5.004 | 1.204  | 1.00 | 0.00 |
| ATOM | 366 | C   | GLY | 25 | -1.872 | 6.523 | 1.811  | 1.00 | 0.00 |
| ATOM | 367 | O   | GLY | 25 | -1.836 | 7.136 | 2.861  | 1.00 | 0.00 |
| ATOM | 368 | N   | MET | 26 | -2.411 | 7.041 | 0.716  | 1.00 | 0.00 |
| ATOM | 369 | H   | MET | 26 | -2.542 | 6.415 | -0.066 | 1.00 | 0.00 |
| ATOM | 370 | CA  | MET | 26 | -2.856 | 8.405 | 0.581  | 1.00 | 0.00 |
| ATOM | 371 | HA  | MET | 26 | -2.005 | 9.080 | 0.681  | 1.00 | 0.00 |
| ATOM | 372 | CB  | MET | 26 | -3.501 | 8.633 | -0.783 | 1.00 | 0.00 |
| ATOM | 373 | HB2 | MET | 26 | -3.433 | 7.712 | -1.361 | 1.00 | 0.00 |
| ATOM | 374 | HB3 | MET | 26 | -4.549 | 8.893 | -0.636 | 1.00 | 0.00 |
| ATOM | 375 | CG  | MET | 26 | -2.802 | 9.755 | -1.535 | 1.00 | 0.00 |

|      |     |         |    |         |        |        |      |      |
|------|-----|---------|----|---------|--------|--------|------|------|
| ATOM | 376 | HG2 MET | 26 | -3.412  | 10.658 | -1.488 | 1.00 | 0.00 |
| ATOM | 377 | HG3 MET | 26 | -1.832  | 9.948  | -1.077 | 1.00 | 0.00 |
| ATOM | 378 | SD MET  | 26 | -2.561  | 9.295  | -3.257 | 1.00 | 0.00 |
| ATOM | 379 | CE MET  | 26 | -1.225  | 10.430 | -3.687 | 1.00 | 0.00 |
| ATOM | 380 | HE1 MET | 26 | -0.363  | 10.236 | -3.049 | 1.00 | 0.00 |
| ATOM | 381 | HE2 MET | 26 | -0.944  | 10.284 | -4.730 | 1.00 | 0.00 |
| ATOM | 382 | HE3 MET | 26 | -1.559  | 11.458 | -3.543 | 1.00 | 0.00 |
| ATOM | 383 | C MET   | 26 | -3.902  | 8.710  | 1.608  | 1.00 | 0.00 |
| ATOM | 384 | O MET   | 26 | -3.821  | 9.753  | 2.212  | 1.00 | 0.00 |
| ATOM | 385 | N TYR   | 27 | -4.910  | 7.862  | 1.774  | 1.00 | 0.00 |
| ATOM | 386 | H TYR   | 27 | -4.962  | 7.057  | 1.167  | 1.00 | 0.00 |
| ATOM | 387 | CA TYR  | 27 | -5.935  | 8.026  | 2.793  | 1.00 | 0.00 |
| ATOM | 388 | HA TYR  | 27 | -6.655  | 8.798  | 2.520  | 1.00 | 0.00 |
| ATOM | 389 | CB TYR  | 27 | -6.665  | 6.691  | 2.892  | 1.00 | 0.00 |
| ATOM | 390 | HB2 TYR | 27 | -7.100  | 6.500  | 1.911  | 1.00 | 0.00 |
| ATOM | 391 | HB3 TYR | 27 | -5.922  | 5.925  | 3.115  | 1.00 | 0.00 |
| ATOM | 392 | CG TYR  | 27 | -7.753  | 6.658  | 3.940  | 1.00 | 0.00 |
| ATOM | 393 | CD1 TYR | 27 | -8.902  | 7.449  | 3.773  | 1.00 | 0.00 |
| ATOM | 394 | HD1 TYR | 27 | -9.007  | 8.081  | 2.890  | 1.00 | 0.00 |
| ATOM | 395 | CE1 TYR | 27 | -9.918  | 7.426  | 4.746  | 1.00 | 0.00 |
| ATOM | 396 | HE1 TYR | 27 | -10.821 | 8.020  | 4.606  | 1.00 | 0.00 |
| ATOM | 397 | CZ TYR  | 27 | -9.783  | 6.603  | 5.884  | 1.00 | 0.00 |

|      |     |      |     |    |         |       |       |      |      |
|------|-----|------|-----|----|---------|-------|-------|------|------|
| ATOM | 398 | OH   | TYR | 27 | -10.747 | 6.589 | 6.843 | 1.00 | 0.00 |
| ATOM | 399 | HH   | TYR | 27 | -11.479 | 7.178 | 6.647 | 1.00 | 0.00 |
| ATOM | 400 | CE2  | TYR | 27 | -8.628  | 5.819 | 6.052 | 1.00 | 0.00 |
| ATOM | 401 | HE2  | TYR | 27 | -8.523  | 5.188 | 6.934 | 1.00 | 0.00 |
| ATOM | 402 | CD2  | TYR | 27 | -7.609  | 5.849 | 5.083 | 1.00 | 0.00 |
| ATOM | 403 | HD2  | TYR | 27 | -6.710  | 5.247 | 5.218 | 1.00 | 0.00 |
| ATOM | 404 | C    | TYR | 27 | -5.358  | 8.375 | 4.161 | 1.00 | 0.00 |
| ATOM | 405 | O    | TYR | 27 | -5.898  | 9.213 | 4.875 | 1.00 | 0.00 |
| ATOM | 406 | N    | LEU | 28 | -4.202  | 7.798 | 4.470 | 1.00 | 0.00 |
| ATOM | 407 | H    | LEU | 28 | -3.801  | 7.136 | 3.821 | 1.00 | 0.00 |
| ATOM | 408 | CA   | LEU | 28 | -3.522  | 8.027 | 5.722 | 1.00 | 0.00 |
| ATOM | 409 | HA   | LEU | 28 | -4.244  | 8.324 | 6.483 | 1.00 | 0.00 |
| ATOM | 410 | CB   | LEU | 28 | -2.814  | 6.764 | 6.189 | 1.00 | 0.00 |
| ATOM | 411 | HB2  | LEU | 28 | -1.861  | 6.831 | 5.663 | 1.00 | 0.00 |
| ATOM | 412 | HB3  | LEU | 28 | -2.639  | 6.806 | 7.264 | 1.00 | 0.00 |
| ATOM | 413 | CG   | LEU | 28 | -3.505  | 5.435 | 5.833 | 1.00 | 0.00 |
| ATOM | 414 | HG   | LEU | 28 | -4.205  | 5.618 | 5.017 | 1.00 | 0.00 |
| ATOM | 415 | CD1  | LEU | 28 | -2.498  | 4.378 | 5.409 | 1.00 | 0.00 |
| ATOM | 416 | HD11 | LEU | 28 | -1.798  | 4.195 | 6.224 | 1.00 | 0.00 |
| ATOM | 417 | HD12 | LEU | 28 | -3.021  | 3.454 | 5.165 | 1.00 | 0.00 |
| ATOM | 418 | HD13 | LEU | 28 | -1.951  | 4.727 | 4.533 | 1.00 | 0.00 |
| ATOM | 419 | CD2  | LEU | 28 | -4.368  | 4.962 | 6.965 | 1.00 | 0.00 |

|      |     |      |     |    |        |        |       |      |      |
|------|-----|------|-----|----|--------|--------|-------|------|------|
| ATOM | 420 | HD21 | LEU | 28 | -5.133 | 5.710  | 7.176 | 1.00 | 0.00 |
| ATOM | 421 | HD22 | LEU | 28 | -4.846 | 4.022  | 6.690 | 1.00 | 0.00 |
| ATOM | 422 | HD23 | LEU | 28 | -3.753 | 4.811  | 7.852 | 1.00 | 0.00 |
| ATOM | 423 | C    | LEU | 28 | -2.545 | 9.180  | 5.564 | 1.00 | 0.00 |
| ATOM | 424 | O    | LEU | 28 | -2.329 | 9.914  | 6.511 | 1.00 | 0.00 |
| ATOM | 425 | N    | MET | 29 | -2.055 | 9.438  | 4.355 | 1.00 | 0.00 |
| ATOM | 426 | H    | MET | 29 | -2.247 | 8.731  | 3.660 | 1.00 | 0.00 |
| ATOM | 427 | CA   | MET | 29 | -1.217 | 10.553 | 3.982 | 1.00 | 0.00 |
| ATOM | 428 | HA   | MET | 29 | -0.575 | 10.840 | 4.815 | 1.00 | 0.00 |
| ATOM | 429 | CB   | MET | 29 | -0.336 | 10.155 | 2.803 | 1.00 | 0.00 |
| ATOM | 430 | HB2  | MET | 29 | -0.538 | 9.114  | 2.551 | 1.00 | 0.00 |
| ATOM | 431 | HB3  | MET | 29 | -0.584 | 10.789 | 1.951 | 1.00 | 0.00 |
| ATOM | 432 | CG   | MET | 29 | 1.135  | 10.317 | 3.143 | 1.00 | 0.00 |
| ATOM | 433 | HG2  | MET | 29 | 1.310  | 9.913  | 4.139 | 1.00 | 0.00 |
| ATOM | 434 | HG3  | MET | 29 | 1.725  | 9.759  | 2.416 | 1.00 | 0.00 |
| ATOM | 435 | SD   | MET | 29 | 1.635  | 12.041 | 3.110 | 1.00 | 0.00 |
| ATOM | 436 | CE   | MET | 29 | 1.630  | 12.289 | 1.325 | 1.00 | 0.00 |
| ATOM | 437 | HE1  | MET | 29 | 0.631  | 12.100 | 0.934 | 1.00 | 0.00 |
| ATOM | 438 | HE2  | MET | 29 | 1.919  | 13.316 | 1.099 | 1.00 | 0.00 |
| ATOM | 439 | HE3  | MET | 29 | 2.338  | 11.603 | 0.860 | 1.00 | 0.00 |
| ATOM | 440 | C    | MET | 29 | -2.005 | 11.824 | 3.683 | 1.00 | 0.00 |
| ATOM | 441 | O    | MET | 29 | -1.471 | 12.815 | 3.198 | 1.00 | 0.00 |

|      |     |     |     |    |        |        |        |      |      |
|------|-----|-----|-----|----|--------|--------|--------|------|------|
| ATOM | 442 | N   | LYS | 30 | -3.313 | 11.807 | 3.910  | 1.00 | 0.00 |
| ATOM | 443 | H   | LYS | 30 | -3.736 | 10.948 | 4.229  | 1.00 | 0.00 |
| ATOM | 444 | CA  | LYS | 30 | -4.173 | 12.937 | 3.644  | 1.00 | 0.00 |
| ATOM | 445 | HA  | LYS | 30 | -3.831 | 13.473 | 2.758  | 1.00 | 0.00 |
| ATOM | 446 | CB  | LYS | 30 | -5.603 | 12.443 | 3.396  | 1.00 | 0.00 |
| ATOM | 447 | HB2 | LYS | 30 | -5.672 | 11.389 | 3.662  | 1.00 | 0.00 |
| ATOM | 448 | HB3 | LYS | 30 | -6.295 | 13.019 | 4.010  | 1.00 | 0.00 |
| ATOM | 449 | CG  | LYS | 30 | -5.964 | 12.620 | 1.916  | 1.00 | 0.00 |
| ATOM | 450 | HG2 | LYS | 30 | -5.053 | 12.577 | 1.318  | 1.00 | 0.00 |
| ATOM | 451 | HG3 | LYS | 30 | -6.635 | 11.817 | 1.613  | 1.00 | 0.00 |
| ATOM | 452 | CD  | LYS | 30 | -6.654 | 13.971 | 1.698  | 1.00 | 0.00 |
| ATOM | 453 | HD2 | LYS | 30 | -7.562 | 13.795 | 1.122  | 1.00 | 0.00 |
| ATOM | 454 | HD3 | LYS | 30 | -6.917 | 14.376 | 2.675  | 1.00 | 0.00 |
| ATOM | 455 | CE  | LYS | 30 | -5.769 | 14.967 | 0.958  | 1.00 | 0.00 |
| ATOM | 456 | HE2 | LYS | 30 | -6.193 | 15.966 | 1.066  | 1.00 | 0.00 |
| ATOM | 457 | HE3 | LYS | 30 | -4.771 | 14.947 | 1.396  | 1.00 | 0.00 |
| ATOM | 458 | NZ  | LYS | 30 | -5.683 | 14.620 | -0.484 | 1.00 | 0.00 |
| ATOM | 459 | HZ1 | LYS | 30 | -6.607 | 14.639 | -0.891 | 1.00 | 0.00 |
| ATOM | 460 | HZ2 | LYS | 30 | -5.093 | 15.290 | -0.957 | 1.00 | 0.00 |
| ATOM | 461 | HZ3 | LYS | 30 | -5.290 | 13.696 | -0.585 | 1.00 | 0.00 |
| ATOM | 462 | C   | LYS | 30 | -4.074 | 13.904 | 4.801  | 1.00 | 0.00 |
| ATOM | 463 | O   | LYS | 30 | -4.379 | 15.068 | 4.590  | 1.00 | 0.00 |



|      |     |      |     |    |        |        |       |      |      |
|------|-----|------|-----|----|--------|--------|-------|------|------|
| ATOM | 464 | N    | ASN | 31 | -3.684 | 13.404 | 5.977 | 1.00 | 0.00 |
| ATOM | 465 | H    | ASN | 31 | -3.556 | 12.407 | 6.069 | 1.00 | 0.00 |
| ATOM | 466 | CA   | ASN | 31 | -3.447 | 14.241 | 7.143 | 1.00 | 0.00 |
| ATOM | 467 | HA   | ASN | 31 | -3.862 | 15.238 | 6.995 | 1.00 | 0.00 |
| ATOM | 468 | CB   | ASN | 31 | -4.137 | 13.597 | 8.348 | 1.00 | 0.00 |
| ATOM | 469 | HB2  | ASN | 31 | -4.117 | 12.510 | 8.283 | 1.00 | 0.00 |
| ATOM | 470 | HB3  | ASN | 31 | -3.601 | 13.918 | 9.241 | 1.00 | 0.00 |
| ATOM | 471 | CG   | ASN | 31 | -5.573 | 14.047 | 8.460 | 1.00 | 0.00 |
| ATOM | 472 | OD1  | ASN | 31 | -5.976 | 14.763 | 9.351 | 1.00 | 0.00 |
| ATOM | 473 | ND2  | ASN | 31 | -6.376 | 13.659 | 7.498 | 1.00 | 0.00 |
| ATOM | 474 | HD21 | ASN | 31 | -7.349 | 13.929 | 7.517 | 1.00 | 0.00 |
| ATOM | 475 | HD22 | ASN | 31 | -6.017 | 13.093 | 6.742 | 1.00 | 0.00 |
| ATOM | 476 | C    | ASN | 31 | -1.956 | 14.394 | 7.432 | 1.00 | 0.00 |
| ATOM | 477 | O    | ASN | 31 | -1.592 | 15.143 | 8.327 | 1.00 | 0.00 |
| ATOM | 478 | N    | LEU | 32 | -1.131 | 13.641 | 6.703 | 1.00 | 0.00 |
| ATOM | 479 | H    | LEU | 32 | -1.503 | 12.963 | 6.054 | 1.00 | 0.00 |
| ATOM | 480 | CA   | LEU | 32 | 0.290  | 13.709 | 6.874 | 1.00 | 0.00 |
| ATOM | 481 | HA   | LEU | 32 | 0.527  | 13.949 | 7.910 | 1.00 | 0.00 |
| ATOM | 482 | CB   | LEU | 32 | 0.933  | 12.373 | 6.524 | 1.00 | 0.00 |
| ATOM | 483 | HB2  | LEU | 32 | 0.590  | 12.140 | 5.515 | 1.00 | 0.00 |
| ATOM | 484 | HB3  | LEU | 32 | 2.019  | 12.473 | 6.523 | 1.00 | 0.00 |
| ATOM | 485 | CG   | LEU | 32 | 0.527  | 11.251 | 7.470 | 1.00 | 0.00 |

|      |     |      |     |    |        |        |       |      |      |
|------|-----|------|-----|----|--------|--------|-------|------|------|
| ATOM | 486 | HG   | LEU | 32 | -0.542 | 11.323 | 7.667 | 1.00 | 0.00 |
| ATOM | 487 | CD1  | LEU | 32 | 0.838  | 9.899  | 6.853 | 1.00 | 0.00 |
| ATOM | 488 | HD11 | LEU | 32 | 1.908  | 9.827  | 6.655 | 1.00 | 0.00 |
| ATOM | 489 | HD12 | LEU | 32 | 0.542  | 9.108  | 7.541 | 1.00 | 0.00 |
| ATOM | 490 | HD13 | LEU | 32 | 0.288  | 9.791  | 5.918 | 1.00 | 0.00 |
| ATOM | 491 | CD2  | LEU | 32 | 1.232  | 11.411 | 8.804 | 1.00 | 0.00 |
| ATOM | 492 | HD21 | LEU | 32 | 0.959  | 12.369 | 9.247 | 1.00 | 0.00 |
| ATOM | 493 | HD22 | LEU | 32 | 0.934  | 10.604 | 9.472 | 1.00 | 0.00 |
| ATOM | 494 | HD23 | LEU | 32 | 2.311  | 11.377 | 8.651 | 1.00 | 0.00 |
| ATOM | 495 | C    | LEU | 32 | 0.850  | 14.834 | 6.047 | 1.00 | 0.00 |
| ATOM | 496 | O    | LEU | 32 | 1.911  | 15.264 | 6.451 | 1.00 | 0.00 |
| ATOM | 497 | N    | GLY | 33 | 0.137  | 15.298 | 4.994 | 1.00 | 0.00 |
| ATOM | 498 | H    | GLY | 33 | -0.747 | 14.844 | 4.814 | 1.00 | 0.00 |
| ATOM | 499 | CA   | GLY | 33 | 0.545  | 16.385 | 4.116 | 1.00 | 0.00 |
| ATOM | 500 | HA2  | GLY | 33 | 0.022  | 16.285 | 3.164 | 1.00 | 0.00 |
| ATOM | 501 | HA3  | GLY | 33 | 0.275  | 17.334 | 4.580 | 1.00 | 0.00 |
| ATOM | 502 | C    | GLY | 33 | 2.048  | 16.369 | 3.860 | 1.00 | 0.00 |
| ATOM | 503 | O    | GLY | 33 | 2.828  | 17.051 | 4.516 | 1.00 | 0.00 |
| ATOM | 504 | N    | GLU | 34 | 2.454  | 15.624 | 2.840 | 1.00 | 0.00 |
| ATOM | 505 | H    | GLU | 34 | 1.797  | 15.086 | 2.294 | 1.00 | 0.00 |
| ATOM | 506 | CA   | GLU | 34 | 3.870  | 15.503 | 2.530 | 1.00 | 0.00 |
| ATOM | 507 | HA   | GLU | 34 | 4.448  | 15.504 | 3.454 | 1.00 | 0.00 |

|      |     |     |     |    |       |        |        |      |      |
|------|-----|-----|-----|----|-------|--------|--------|------|------|
| ATOM | 508 | CB  | GLU | 34 | 4.155 | 14.203 | 1.777  | 1.00 | 0.00 |
| ATOM | 509 | HB2 | GLU | 34 | 3.848 | 13.363 | 2.399  | 1.00 | 0.00 |
| ATOM | 510 | HB3 | GLU | 34 | 3.577 | 14.200 | 0.852  | 1.00 | 0.00 |
| ATOM | 511 | CG  | GLU | 34 | 5.644 | 14.076 | 1.448  | 1.00 | 0.00 |
| ATOM | 512 | HG2 | GLU | 34 | 5.789 | 13.077 | 1.038  | 1.00 | 0.00 |
| ATOM | 513 | HG3 | GLU | 34 | 5.920 | 14.819 | 0.699  | 1.00 | 0.00 |
| ATOM | 514 | CD  | GLU | 34 | 6.523 | 14.251 | 2.687  | 1.00 | 0.00 |
| ATOM | 515 | OE1 | GLU | 34 | 6.039 | 13.996 | 3.807  | 1.00 | 0.00 |
| ATOM | 516 | OE2 | GLU | 34 | 7.681 | 14.679 | 2.522  | 1.00 | 0.00 |
| ATOM | 517 | C   | GLU | 34 | 4.347 | 16.712 | 1.733  | 1.00 | 0.00 |
| ATOM | 518 | O   | GLU | 34 | 4.562 | 16.638 | 0.521  | 1.00 | 0.00 |
| ATOM | 519 | N   | ARG | 35 | 4.356 | 17.883 | 2.366  | 1.00 | 0.00 |
| ATOM | 520 | H   | ARG | 35 | 4.024 | 17.933 | 3.318  | 1.00 | 0.00 |
| ATOM | 521 | CA  | ARG | 35 | 4.796 | 19.108 | 1.727  | 1.00 | 0.00 |
| ATOM | 522 | HA  | ARG | 35 | 5.817 | 18.991 | 1.364  | 1.00 | 0.00 |
| ATOM | 523 | CB  | ARG | 35 | 3.884 | 19.445 | 0.531  | 1.00 | 0.00 |
| ATOM | 524 | HB2 | ARG | 35 | 3.591 | 18.520 | 0.036  | 1.00 | 0.00 |
| ATOM | 525 | HB3 | ARG | 35 | 2.995 | 19.959 | 0.896  | 1.00 | 0.00 |
| ATOM | 526 | CG  | ARG | 35 | 4.616 | 20.341 | -0.461 | 1.00 | 0.00 |
| ATOM | 527 | HG2 | ARG | 35 | 3.999 | 21.218 | -0.662 | 1.00 | 0.00 |
| ATOM | 528 | HG3 | ARG | 35 | 5.560 | 20.656 | -0.017 | 1.00 | 0.00 |
| ATOM | 529 | CD  | ARG | 35 | 4.892 | 19.599 | -1.775 | 1.00 | 0.00 |

|      |     |      |     |    |       |        |        |      |      |
|------|-----|------|-----|----|-------|--------|--------|------|------|
| ATOM | 530 | HD2  | ARG | 35 | 4.903 | 18.525 | -1.590 | 1.00 | 0.00 |
| ATOM | 531 | HD3  | ARG | 35 | 4.110 | 19.836 | -2.497 | 1.00 | 0.00 |
| ATOM | 532 | NE   | ARG | 35 | 6.191 | 19.992 | -2.343 | 1.00 | 0.00 |
| ATOM | 533 | HE   | ARG | 35 | 6.821 | 20.475 | -1.719 | 1.00 | 0.00 |
| ATOM | 534 | CZ   | ARG | 35 | 6.603 | 19.718 | -3.564 | 1.00 | 0.00 |
| ATOM | 535 | NH1  | ARG | 35 | 5.826 | 19.094 | -4.414 | 1.00 | 0.00 |
| ATOM | 536 | HH11 | ARG | 35 | 4.896 | 18.817 | -4.134 | 1.00 | 0.00 |
| ATOM | 537 | HH12 | ARG | 35 | 6.161 | 18.894 | -5.346 | 1.00 | 0.00 |
| ATOM | 538 | NH2  | ARG | 35 | 7.781 | 20.118 | -3.965 | 1.00 | 0.00 |
| ATOM | 539 | HH21 | ARG | 35 | 8.376 | 20.639 | -3.336 | 1.00 | 0.00 |
| ATOM | 540 | HH22 | ARG | 35 | 8.091 | 19.905 | -4.903 | 1.00 | 0.00 |
| ATOM | 541 | C    | ARG | 35 | 4.776 | 20.230 | 2.741  | 1.00 | 0.00 |
| ATOM | 542 | O    | ARG | 35 | 5.829 | 20.745 | 3.077  | 1.00 | 0.00 |
| ATOM | 543 | N    | SER | 36 | 3.571 | 20.661 | 3.125  | 1.00 | 0.00 |
| ATOM | 544 | H    | SER | 36 | 2.753 | 20.229 | 2.720  | 1.00 | 0.00 |
| ATOM | 545 | CA   | SER | 36 | 3.379 | 21.737 | 4.084  | 1.00 | 0.00 |
| ATOM | 546 | HA   | SER | 36 | 3.894 | 21.509 | 5.017  | 1.00 | 0.00 |
| ATOM | 547 | CB   | SER | 36 | 3.953 | 23.037 | 3.514  | 1.00 | 0.00 |
| ATOM | 548 | HB2  | SER | 36 | 5.031 | 22.925 | 3.399  | 1.00 | 0.00 |
| ATOM | 549 | HB3  | SER | 36 | 3.502 | 23.224 | 2.539  | 1.00 | 0.00 |
| ATOM | 550 | OG   | SER | 36 | 3.684 | 24.118 | 4.368  | 1.00 | 0.00 |
| ATOM | 551 | HG   | SER | 36 | 4.052 | 24.922 | 3.992  | 1.00 | 0.00 |

|      |     |      |     |    |        |        |       |      |      |
|------|-----|------|-----|----|--------|--------|-------|------|------|
| ATOM | 552 | C    | SER | 36 | 1.895  | 21.905 | 4.376 | 1.00 | 0.00 |
| ATOM | 553 | O    | SER | 36 | 1.446  | 21.686 | 5.494 | 1.00 | 0.00 |
| ATOM | 554 | N    | GLN | 37 | 1.113  | 22.242 | 3.344 | 1.00 | 0.00 |
| ATOM | 555 | H    | GLN | 37 | 1.528  | 22.411 | 2.438 | 1.00 | 0.00 |
| ATOM | 556 | CA   | GLN | 37 | -0.323 | 22.440 | 3.493 | 1.00 | 0.00 |
| ATOM | 557 | HA   | GLN | 37 | -0.758 | 21.618 | 4.060 | 1.00 | 0.00 |
| ATOM | 558 | CB   | GLN | 37 | -0.593 | 23.746 | 4.241 | 1.00 | 0.00 |
| ATOM | 559 | HB2  | GLN | 37 | 0.131  | 23.860 | 5.048 | 1.00 | 0.00 |
| ATOM | 560 | HB3  | GLN | 37 | -0.502 | 24.586 | 3.551 | 1.00 | 0.00 |
| ATOM | 561 | CG   | GLN | 37 | -2.007 | 23.717 | 4.825 | 1.00 | 0.00 |
| ATOM | 562 | HG2  | GLN | 37 | -2.736 | 23.886 | 4.032 | 1.00 | 0.00 |
| ATOM | 563 | HG3  | GLN | 37 | -2.174 | 22.736 | 5.269 | 1.00 | 0.00 |
| ATOM | 564 | CD   | GLN | 37 | -2.203 | 24.776 | 5.898 | 1.00 | 0.00 |
| ATOM | 565 | OE1  | GLN | 37 | -1.301 | 25.466 | 6.334 | 1.00 | 0.00 |
| ATOM | 566 | NE2  | GLN | 37 | -3.426 | 24.945 | 6.348 | 1.00 | 0.00 |
| ATOM | 567 | HE21 | GLN | 37 | -3.607 | 25.637 | 7.061 | 1.00 | 0.00 |
| ATOM | 568 | HE22 | GLN | 37 | -4.179 | 24.383 | 5.978 | 1.00 | 0.00 |
| ATOM | 569 | C    | GLN | 37 | -1.005 | 22.435 | 2.133 | 1.00 | 0.00 |
| ATOM | 570 | O    | GLN | 37 | -1.392 | 23.462 | 1.581 | 1.00 | 0.00 |
| ATOM | 571 | N    | VAL | 38 | -1.024 | 21.264 | 1.508 | 1.00 | 0.00 |
| ATOM | 572 | H    | VAL | 38 | -0.514 | 20.476 | 1.880 | 1.00 | 0.00 |
| ATOM | 573 | CA   | VAL | 38 | -1.680 | 21.114 | 0.217 | 1.00 | 0.00 |

|      |     |      |     |    |        |        |        |      |      |
|------|-----|------|-----|----|--------|--------|--------|------|------|
| ATOM | 574 | HA   | VAL | 38 | -1.467 | 21.952 | -0.448 | 1.00 | 0.00 |
| ATOM | 575 | CB   | VAL | 38 | -1.216 | 19.823 | -0.460 | 1.00 | 0.00 |
| ATOM | 576 | HB   | VAL | 38 | -1.743 | 19.698 | -1.406 | 1.00 | 0.00 |
| ATOM | 577 | CG1  | VAL | 38 | 0.294  | 19.899 | -0.723 | 1.00 | 0.00 |
| ATOM | 578 | HG11 | VAL | 38 | 0.822  | 20.024 | 0.222  | 1.00 | 0.00 |
| ATOM | 579 | HG12 | VAL | 38 | 0.626  | 18.980 | -1.206 | 1.00 | 0.00 |
| ATOM | 580 | HG13 | VAL | 38 | 0.508  | 20.748 | -1.373 | 1.00 | 0.00 |
| ATOM | 581 | CG2  | VAL | 38 | -1.543 | 18.586 | 0.385  | 1.00 | 0.00 |
| ATOM | 582 | HG21 | VAL | 38 | -2.620 | 18.524 | 0.536  | 1.00 | 0.00 |
| ATOM | 583 | HG22 | VAL | 38 | -1.197 | 17.691 | -0.132 | 1.00 | 0.00 |
| ATOM | 584 | HG23 | VAL | 38 | -1.044 | 18.664 | 1.351  | 1.00 | 0.00 |
| ATOM | 585 | C    | VAL | 38 | -3.191 | 21.185 | 0.370  | 1.00 | 0.00 |
| ATOM | 586 | O    | VAL | 38 | -3.695 | 21.206 | 1.494  | 1.00 | 0.00 |
| ATOM | 587 | N    | SER | 39 | -3.902 | 21.193 | -0.763 | 1.00 | 0.00 |
| ATOM | 588 | H    | SER | 39 | -3.425 | 21.246 | -1.652 | 1.00 | 0.00 |
| ATOM | 589 | CA   | SER | 39 | -5.354 | 21.217 | -0.759 | 1.00 | 0.00 |
| ATOM | 590 | HA   | SER | 39 | -5.703 | 22.170 | -0.361 | 1.00 | 0.00 |
| ATOM | 591 | CB   | SER | 39 | -5.909 | 21.047 | -2.188 | 1.00 | 0.00 |
| ATOM | 592 | HB2  | SER | 39 | -6.743 | 21.739 | -2.308 | 1.00 | 0.00 |
| ATOM | 593 | HB3  | SER | 39 | -5.116 | 21.310 | -2.889 | 1.00 | 0.00 |
| ATOM | 594 | OG   | SER | 39 | -6.351 | 19.722 | -2.449 | 1.00 | 0.00 |
| ATOM | 595 | HG   | SER | 39 | -6.686 | 19.668 | -3.347 | 1.00 | 0.00 |

|      |     |     |     |    |         |        |        |      |      |
|------|-----|-----|-----|----|---------|--------|--------|------|------|
| ATOM | 596 | C   | SER | 39 | -5.932  | 20.151 | 0.185  | 1.00 | 0.00 |
| ATOM | 597 | O   | SER | 39 | -5.297  | 19.142 | 0.532  | 1.00 | 0.00 |
| ATOM | 598 | N   | PRO | 40 | -7.221  | 20.291 | 0.499  | 1.00 | 0.00 |
| ATOM | 599 | CD  | PRO | 40 | -8.120  | 21.341 | 0.049  | 1.00 | 0.00 |
| ATOM | 600 | HD2 | PRO | 40 | -8.265  | 21.220 | -1.025 | 1.00 | 0.00 |
| ATOM | 601 | HD3 | PRO | 40 | -7.639  | 22.300 | 0.243  | 1.00 | 0.00 |
| ATOM | 602 | CG  | PRO | 40 | -9.414  | 21.169 | 0.839  | 1.00 | 0.00 |
| ATOM | 603 | HG2 | PRO | 40 | -10.225 | 20.936 | 0.149  | 1.00 | 0.00 |
| ATOM | 604 | HG3 | PRO | 40 | -9.639  | 22.099 | 1.361  | 1.00 | 0.00 |
| ATOM | 605 | CB  | PRO | 40 | -9.178  | 20.031 | 1.828  | 1.00 | 0.00 |
| ATOM | 606 | HB2 | PRO | 40 | -10.013 | 19.332 | 1.800  | 1.00 | 0.00 |
| ATOM | 607 | HB3 | PRO | 40 | -9.047  | 20.400 | 2.845  | 1.00 | 0.00 |
| ATOM | 608 | CA  | PRO | 40 | -7.895  | 19.331 | 1.355  | 1.00 | 0.00 |
| ATOM | 609 | HA  | PRO | 40 | -7.263  | 19.139 | 2.221  | 1.00 | 0.00 |
| ATOM | 610 | C   | PRO | 40 | -8.168  | 18.015 | 0.621  | 1.00 | 0.00 |
| ATOM | 611 | O   | PRO | 40 | -7.607  | 17.685 | -0.431 | 1.00 | 0.00 |
| ATOM | 612 | N   | ARG | 41 | -9.025  | 17.183 | 1.206  | 1.00 | 0.00 |
| ATOM | 613 | H   | ARG | 41 | -9.361  | 17.405 | 2.132  | 1.00 | 0.00 |
| ATOM | 614 | CA  | ARG | 41 | -9.446  | 15.945 | 0.606  | 1.00 | 0.00 |
| ATOM | 615 | HA  | ARG | 41 | -8.599  | 15.468 | 0.113  | 1.00 | 0.00 |
| ATOM | 616 | CB  | ARG | 41 | -9.995  | 14.991 | 1.670  | 1.00 | 0.00 |
| ATOM | 617 | HB2 | ARG | 41 | -9.368  | 15.052 | 2.559  | 1.00 | 0.00 |

|      |     |          |    |         |        |        |      |      |
|------|-----|----------|----|---------|--------|--------|------|------|
| ATOM | 618 | HB3 ARG  | 41 | -11.013 | 15.287 | 1.922  | 1.00 | 0.00 |
| ATOM | 619 | CG ARG   | 41 | -9.997  | 13.545 | 1.142  | 1.00 | 0.00 |
| ATOM | 620 | HG2 ARG  | 41 | -9.415  | 13.525 | 0.220  | 1.00 | 0.00 |
| ATOM | 621 | HG3 ARG  | 41 | -9.515  | 12.915 | 1.889  | 1.00 | 0.00 |
| ATOM | 622 | CD ARG   | 41 | -11.404 | 13.022 | 0.866  | 1.00 | 0.00 |
| ATOM | 623 | HD2 ARG  | 41 | -12.131 | 13.814 | 1.048  | 1.00 | 0.00 |
| ATOM | 624 | HD3 ARG  | 41 | -11.476 | 12.695 | -0.172 | 1.00 | 0.00 |
| ATOM | 625 | NE ARG   | 41 | -11.715 | 11.891 | 1.736  | 1.00 | 0.00 |
| ATOM | 626 | HE ARG   | 41 | -11.643 | 10.973 | 1.323  | 1.00 | 0.00 |
| ATOM | 627 | CZ ARG   | 41 | -12.175 | 11.993 | 2.970  | 1.00 | 0.00 |
| ATOM | 628 | NH1 ARG  | 41 | -12.325 | 13.164 | 3.542  | 1.00 | 0.00 |
| ATOM | 629 | HH11 ARG | 41 | -12.086 | 14.005 | 3.035  | 1.00 | 0.00 |
| ATOM | 630 | HH12 ARG | 41 | -12.678 | 13.220 | 4.486  | 1.00 | 0.00 |
| ATOM | 631 | NH2 ARG  | 41 | -12.383 | 10.914 | 3.671  | 1.00 | 0.00 |
| ATOM | 632 | HH21 ARG | 41 | -12.191 | 10.009 | 3.267  | 1.00 | 0.00 |
| ATOM | 633 | HH22 ARG | 41 | -12.735 | 10.989 | 4.614  | 1.00 | 0.00 |
| ATOM | 634 | C ARG    | 41 | -10.475 | 16.208 | -0.470 | 1.00 | 0.00 |
| ATOM | 635 | O ARG    | 41 | -11.488 | 15.553 | -0.462 | 1.00 | 0.00 |
| ATOM | 636 | N MET    | 42 | -10.227 | 17.140 | -1.377 | 1.00 | 0.00 |
| ATOM | 637 | H MET    | 42 | -9.372  | 17.675 | -1.311 | 1.00 | 0.00 |
| ATOM | 638 | CA MET   | 42 | -11.139 | 17.431 | -2.471 | 1.00 | 0.00 |
| ATOM | 639 | HA MET   | 42 | -12.014 | 17.971 | -2.109 | 1.00 | 0.00 |



|      |     |     |     |    |         |        |        |      |      |
|------|-----|-----|-----|----|---------|--------|--------|------|------|
| ATOM | 640 | CB  | MET | 42 | -10.415 | 18.305 | -3.496 | 1.00 | 0.00 |
| ATOM | 641 | HB2 | MET | 42 | -11.035 | 18.378 | -4.390 | 1.00 | 0.00 |
| ATOM | 642 | HB3 | MET | 42 | -10.276 | 19.298 | -3.069 | 1.00 | 0.00 |
| ATOM | 643 | CG  | MET | 42 | -9.047  | 17.713 | -3.870 | 1.00 | 0.00 |
| ATOM | 644 | HG2 | MET | 42 | -8.305  | 18.118 | -3.181 | 1.00 | 0.00 |
| ATOM | 645 | HG3 | MET | 42 | -9.104  | 16.632 | -3.748 | 1.00 | 0.00 |
| ATOM | 646 | SD  | MET | 42 | -8.554  | 18.093 | -5.560 | 1.00 | 0.00 |
| ATOM | 647 | CE  | MET | 42 | -8.081  | 19.825 | -5.308 | 1.00 | 0.00 |
| ATOM | 648 | HE1 | MET | 42 | -7.276  | 19.880 | -4.575 | 1.00 | 0.00 |
| ATOM | 649 | HE2 | MET | 42 | -7.740  | 20.251 | -6.253 | 1.00 | 0.00 |
| ATOM | 650 | HE3 | MET | 42 | -8.941  | 20.388 | -4.946 | 1.00 | 0.00 |
| ATOM | 651 | C   | MET | 42 | -11.627 | 16.158 | -3.174 | 1.00 | 0.00 |
| ATOM | 652 | O   | MET | 42 | -12.723 | 16.153 | -3.707 | 1.00 | 0.00 |
| ATOM | 653 | N   | ARG | 43 | -10.797 | 15.097 | -3.156 | 1.00 | 0.00 |
| ATOM | 654 | H   | ARG | 43 | -9.857  | 15.228 | -2.811 | 1.00 | 0.00 |
| ATOM | 655 | CA  | ARG | 43 | -11.157 | 13.807 | -3.681 | 1.00 | 0.00 |
| ATOM | 656 | HA  | ARG | 43 | -11.295 | 13.874 | -4.761 | 1.00 | 0.00 |
| ATOM | 657 | CB  | ARG | 43 | -10.055 | 12.781 | -3.391 | 1.00 | 0.00 |
| ATOM | 658 | HB2 | ARG | 43 | -9.134  | 13.299 | -3.120 | 1.00 | 0.00 |
| ATOM | 659 | HB3 | ARG | 43 | -10.363 | 12.135 | -2.570 | 1.00 | 0.00 |
| ATOM | 660 | CG  | ARG | 43 | -9.814  | 11.934 | -4.645 | 1.00 | 0.00 |
| ATOM | 661 | HG2 | ARG | 43 | -9.519  | 10.929 | -4.344 | 1.00 | 0.00 |

|      |     |      |     |    |         |        |        |      |      |
|------|-----|------|-----|----|---------|--------|--------|------|------|
| ATOM | 662 | HG3  | ARG | 43 | -10.737 | 11.884 | -5.223 | 1.00 | 0.00 |
| ATOM | 663 | CD   | ARG | 43 | -8.705  | 12.556 | -5.506 | 1.00 | 0.00 |
| ATOM | 664 | HD2  | ARG | 43 | -8.741  | 12.129 | -6.509 | 1.00 | 0.00 |
| ATOM | 665 | HD3  | ARG | 43 | -8.854  | 13.635 | -5.566 | 1.00 | 0.00 |
| ATOM | 666 | NE   | ARG | 43 | -7.369  | 12.293 | -4.926 | 1.00 | 0.00 |
| ATOM | 667 | HE   | ARG | 43 | -7.309  | 11.513 | -4.289 | 1.00 | 0.00 |
| ATOM | 668 | CZ   | ARG | 43 | -6.261  | 12.943 | -5.232 | 1.00 | 0.00 |
| ATOM | 669 | NH1  | ARG | 43 | -6.278  | 13.935 | -6.081 | 1.00 | 0.00 |
| ATOM | 670 | HH11 | ARG | 43 | -7.148  | 14.213 | -6.512 | 1.00 | 0.00 |
| ATOM | 671 | HH12 | ARG | 43 | -5.420  | 14.421 | -6.303 | 1.00 | 0.00 |
| ATOM | 672 | NH2  | ARG | 43 | -5.136  | 12.649 | -4.624 | 1.00 | 0.00 |
| ATOM | 673 | HH21 | ARG | 43 | -5.120  | 11.924 | -3.922 | 1.00 | 0.00 |
| ATOM | 674 | HH22 | ARG | 43 | -4.291  | 13.150 | -4.862 | 1.00 | 0.00 |
| ATOM | 675 | C    | ARG | 43 | -12.498 | 13.362 | -3.118 | 1.00 | 0.00 |
| ATOM | 676 | O    | ARG | 43 | -12.741 | 13.472 | -1.924 | 1.00 | 0.00 |
| ATOM | 677 | N    | GLU | 44 | -13.289 | 12.738 | -3.953 | 1.00 | 0.00 |
| ATOM | 678 | H    | GLU | 44 | -13.026 | 12.657 | -4.925 | 1.00 | 0.00 |
| ATOM | 679 | CA   | GLU | 44 | -14.576 | 12.192 | -3.537 | 1.00 | 0.00 |
| ATOM | 680 | HA   | GLU | 44 | -14.793 | 12.488 | -2.511 | 1.00 | 0.00 |
| ATOM | 681 | CB   | GLU | 44 | -15.686 | 12.724 | -4.444 | 1.00 | 0.00 |
| ATOM | 682 | HB2  | GLU | 44 | -16.630 | 12.282 | -4.128 | 1.00 | 0.00 |
| ATOM | 683 | HB3  | GLU | 44 | -15.735 | 13.807 | -4.329 | 1.00 | 0.00 |

|      |     |     |     |    |         |        |        |      |      |
|------|-----|-----|-----|----|---------|--------|--------|------|------|
| ATOM | 684 | CG  | GLU | 44 | -15.427 | 12.377 | -5.924 | 1.00 | 0.00 |
| ATOM | 685 | HG2 | GLU | 44 | -15.260 | 13.275 | -6.520 | 1.00 | 0.00 |
| ATOM | 686 | HG3 | GLU | 44 | -14.524 | 11.767 | -5.927 | 1.00 | 0.00 |
| ATOM | 687 | CD  | GLU | 44 | -16.586 | 11.576 | -6.522 | 1.00 | 0.00 |
| ATOM | 688 | OE1 | GLU | 44 | -16.596 | 10.346 | -6.292 | 1.00 | 0.00 |
| ATOM | 689 | OE2 | GLU | 44 | -17.465 | 12.229 | -7.131 | 1.00 | 0.00 |
| ATOM | 690 | C   | GLU | 44 | -14.553 | 10.662 | -3.564 | 1.00 | 0.00 |
| ATOM | 691 | O   | GLU | 44 | -15.284 | 10.020 | -2.819 | 1.00 | 0.00 |
| ATOM | 692 | N   | GLU | 45 | -13.601 | 10.089 | -4.309 | 1.00 | 0.00 |
| ATOM | 693 | H   | GLU | 45 | -12.953 | 10.672 | -4.820 | 1.00 | 0.00 |
| ATOM | 694 | CA  | GLU | 45 | -13.494 | 8.656  | -4.455 | 1.00 | 0.00 |
| ATOM | 695 | HA  | GLU | 45 | -14.490 | 8.217  | -4.504 | 1.00 | 0.00 |
| ATOM | 696 | CB  | GLU | 45 | -12.735 | 8.295  | -5.741 | 1.00 | 0.00 |
| ATOM | 697 | HB2 | GLU | 45 | -12.208 | 9.178  | -6.103 | 1.00 | 0.00 |
| ATOM | 698 | HB3 | GLU | 45 | -12.015 | 7.508  | -5.521 | 1.00 | 0.00 |
| ATOM | 699 | CG  | GLU | 45 | -13.716 | 7.805  | -6.821 | 1.00 | 0.00 |
| ATOM | 700 | HG2 | GLU | 45 | -13.961 | 6.744  | -6.842 | 1.00 | 0.00 |
| ATOM | 701 | HG3 | GLU | 45 | -14.591 | 8.374  | -6.507 | 1.00 | 0.00 |
| ATOM | 702 | CD  | GLU | 45 | -13.290 | 8.257  | -8.219 | 1.00 | 0.00 |
| ATOM | 703 | OE1 | GLU | 45 | -13.377 | 9.474  | -8.491 | 1.00 | 0.00 |
| ATOM | 704 | OE2 | GLU | 45 | -12.663 | 7.422  | -8.914 | 1.00 | 0.00 |
| ATOM | 705 | C   | GLU | 45 | -12.795 | 8.114  | -3.219 | 1.00 | 0.00 |

|      |     |     |     |    |         |       |        |      |      |
|------|-----|-----|-----|----|---------|-------|--------|------|------|
| ATOM | 706 | O   | GLU | 45 | -11.617 | 8.418 | -2.958 | 1.00 | 0.00 |
| ATOM | 707 | N   | ASP | 46 | -13.512 | 7.281 | -2.473 | 1.00 | 0.00 |
| ATOM | 708 | H   | ASP | 46 | -14.457 | 7.058 | -2.750 | 1.00 | 0.00 |
| ATOM | 709 | CA  | ASP | 46 | -12.989 | 6.678 | -1.266 | 1.00 | 0.00 |
| ATOM | 710 | HA  | ASP | 46 | -12.588 | 7.454 | -0.614 | 1.00 | 0.00 |
| ATOM | 711 | CB  | ASP | 46 | -14.090 | 5.925 | -0.513 | 1.00 | 0.00 |
| ATOM | 712 | HB2 | ASP | 46 | -14.965 | 6.558 | -0.660 | 1.00 | 0.00 |
| ATOM | 713 | HB3 | ASP | 46 | -14.278 | 4.941 | -0.942 | 1.00 | 0.00 |
| ATOM | 714 | CG  | ASP | 46 | -13.808 | 5.784 | 0.986  | 1.00 | 0.00 |
| ATOM | 715 | OD1 | ASP | 46 | -12.781 | 6.339 | 1.455  | 1.00 | 0.00 |
| ATOM | 716 | OD2 | ASP | 46 | -14.554 | 5.034 | 1.646  | 1.00 | 0.00 |
| ATOM | 717 | C   | ASP | 46 | -11.879 | 5.701 | -1.639 | 1.00 | 0.00 |
| ATOM | 718 | O   | ASP | 46 | -11.944 | 4.960 | -2.632 | 1.00 | 0.00 |
| ATOM | 719 | N   | HID | 47 | -10.801 | 5.682 | -0.867 | 1.00 | 0.00 |
| ATOM | 720 | H   | HID | 47 | -10.719 | 6.342 | -0.107 | 1.00 | 0.00 |
| ATOM | 721 | CA  | HID | 47 | -9.690  | 4.778 | -1.117 | 1.00 | 0.00 |
| ATOM | 722 | HA  | HID | 47 | -9.929  | 4.107 | -1.942 | 1.00 | 0.00 |
| ATOM | 723 | CB  | HID | 47 | -8.448  | 5.580 | -1.487 | 1.00 | 0.00 |
| ATOM | 724 | HB2 | HID | 47 | -8.270  | 6.382 | -0.770 | 1.00 | 0.00 |
| ATOM | 725 | HB3 | HID | 47 | -7.571  | 4.935 | -1.536 | 1.00 | 0.00 |
| ATOM | 726 | CG  | HID | 47 | -8.578  | 6.235 | -2.844 | 1.00 | 0.00 |
| ATOM | 727 | ND1 | HID | 47 | -9.557  | 5.935 | -3.783 | 1.00 | 0.00 |

|      |     |     |     |    |         |       |        |      |      |
|------|-----|-----|-----|----|---------|-------|--------|------|------|
| ATOM | 728 | HD1 | HID | 47 | -10.280 | 5.237 | -3.686 | 1.00 | 0.00 |
| ATOM | 729 | CE1 | HID | 47 | -9.372  | 6.739 | -4.847 | 1.00 | 0.00 |
| ATOM | 730 | HE1 | HID | 47 | -10.054 | 6.693 | -5.697 | 1.00 | 0.00 |
| ATOM | 731 | NE2 | HID | 47 | -8.278  | 7.511 | -4.625 | 1.00 | 0.00 |
| ATOM | 732 | CD2 | HID | 47 | -7.768  | 7.212 | -3.370 | 1.00 | 0.00 |
| ATOM | 733 | HD2 | HID | 47 | -6.885  | 7.735 | -3.002 | 1.00 | 0.00 |
| ATOM | 734 | C   | HID | 47 | -9.472  | 3.930 | 0.100  | 1.00 | 0.00 |
| ATOM | 735 | O   | HID | 47 | -9.249  | 4.485 | 1.166  | 1.00 | 0.00 |
| ATOM | 736 | N   | LYS | 48 | -9.456  | 2.609 | -0.100 | 1.00 | 0.00 |
| ATOM | 737 | H   | LYS | 48 | -9.637  | 2.273 | -1.035 | 1.00 | 0.00 |
| ATOM | 738 | CA  | LYS | 48 | -9.249  | 1.630 | 0.959  | 1.00 | 0.00 |
| ATOM | 739 | HA  | LYS | 48 | -8.216  | 1.669 | 1.306  | 1.00 | 0.00 |
| ATOM | 740 | CB  | LYS | 48 | -10.174 | 1.931 | 2.141  | 1.00 | 0.00 |
| ATOM | 741 | HB2 | LYS | 48 | -10.750 | 2.830 | 1.919  | 1.00 | 0.00 |
| ATOM | 742 | HB3 | LYS | 48 | -10.853 | 1.090 | 2.281  | 1.00 | 0.00 |
| ATOM | 743 | CG  | LYS | 48 | -9.359  | 2.150 | 3.422  | 1.00 | 0.00 |
| ATOM | 744 | HG2 | LYS | 48 | -8.708  | 1.289 | 3.572  | 1.00 | 0.00 |
| ATOM | 745 | HG3 | LYS | 48 | -8.751  | 3.047 | 3.298  | 1.00 | 0.00 |
| ATOM | 746 | CD  | LYS | 48 | -10.275 | 2.317 | 4.641  | 1.00 | 0.00 |
| ATOM | 747 | HD2 | LYS | 48 | -9.687  | 2.707 | 5.472  | 1.00 | 0.00 |
| ATOM | 748 | HD3 | LYS | 48 | -11.066 | 3.025 | 4.392  | 1.00 | 0.00 |
| ATOM | 749 | CE  | LYS | 48 | -10.899 | 0.971 | 5.042  | 1.00 | 0.00 |

|      |     |      |     |    |         |        |        |      |      |
|------|-----|------|-----|----|---------|--------|--------|------|------|
| ATOM | 750 | HE2  | LYS | 48 | -10.161 | 0.183  | 4.890  | 1.00 | 0.00 |
| ATOM | 751 | HE3  | LYS | 48 | -11.175 | 1.012  | 6.095  | 1.00 | 0.00 |
| ATOM | 752 | NZ   | LYS | 48 | -12.106 | 0.683  | 4.225  | 1.00 | 0.00 |
| ATOM | 753 | HZ1  | LYS | 48 | -11.850 | 0.645  | 3.248  | 1.00 | 0.00 |
| ATOM | 754 | HZ2  | LYS | 48 | -12.498 | -0.204 | 4.505  | 1.00 | 0.00 |
| ATOM | 755 | HZ3  | LYS | 48 | -12.790 | 1.413  | 4.365  | 1.00 | 0.00 |
| ATOM | 756 | C    | LYS | 48 | -9.481  | 0.220  | 0.444  | 1.00 | 0.00 |
| ATOM | 757 | O    | LYS | 48 | -8.772  | -0.703 | 0.805  | 1.00 | 0.00 |
| ATOM | 758 | N    | GLN | 49 | -10.401 | 0.084  | -0.506 | 1.00 | 0.00 |
| ATOM | 759 | H    | GLN | 49 | -10.917 | 0.893  | -0.825 | 1.00 | 0.00 |
| ATOM | 760 | CA   | GLN | 49 | -10.681 | -1.186 | -1.116 | 1.00 | 0.00 |
| ATOM | 761 | HA   | GLN | 49 | -10.477 | -1.982 | -0.401 | 1.00 | 0.00 |
| ATOM | 762 | CB   | GLN | 49 | -12.135 | -1.285 | -1.553 | 1.00 | 0.00 |
| ATOM | 763 | HB2  | GLN | 49 | -12.590 | -0.294 | -1.528 | 1.00 | 0.00 |
| ATOM | 764 | HB3  | GLN | 49 | -12.183 | -1.680 | -2.568 | 1.00 | 0.00 |
| ATOM | 765 | CG   | GLN | 49 | -12.891 | -2.216 | -0.608 | 1.00 | 0.00 |
| ATOM | 766 | HG2  | GLN | 49 | -12.408 | -3.192 | -0.638 | 1.00 | 0.00 |
| ATOM | 767 | HG3  | GLN | 49 | -12.854 | -1.823 | 0.408  | 1.00 | 0.00 |
| ATOM | 768 | CD   | GLN | 49 | -14.347 | -2.381 | -1.012 | 1.00 | 0.00 |
| ATOM | 769 | OE1  | GLN | 49 | -14.787 | -1.970 | -2.066 | 1.00 | 0.00 |
| ATOM | 770 | NE2  | GLN | 49 | -15.129 | -2.979 | -0.144 | 1.00 | 0.00 |
| ATOM | 771 | HE21 | GLN | 49 | -16.106 | -3.115 | -0.360 | 1.00 | 0.00 |

|      |     |      |     |    |         |        |        |      |      |
|------|-----|------|-----|----|---------|--------|--------|------|------|
| ATOM | 772 | HE22 | GLN | 49 | -14.750 | -3.299 | 0.735  | 1.00 | 0.00 |
| ATOM | 773 | C    | GLN | 49 | -9.818  | -1.344 | -2.329 | 1.00 | 0.00 |
| ATOM | 774 | O    | GLN | 49 | -9.468  | -2.456 | -2.583 | 1.00 | 0.00 |
| ATOM | 775 | N    | LEU | 50 | -9.350  | -0.294 | -2.997 | 1.00 | 0.00 |
| ATOM | 776 | H    | LEU | 50 | -9.668  | 0.622  | -2.714 | 1.00 | 0.00 |
| ATOM | 777 | CA   | LEU | 50 | -8.455  | -0.389 | -4.138 | 1.00 | 0.00 |
| ATOM | 778 | HA   | LEU | 50 | -8.869  | -1.047 | -4.902 | 1.00 | 0.00 |
| ATOM | 779 | CB   | LEU | 50 | -8.284  | 1.016  | -4.740 | 1.00 | 0.00 |
| ATOM | 780 | HB2  | LEU | 50 | -8.397  | 1.709  | -3.906 | 1.00 | 0.00 |
| ATOM | 781 | HB3  | LEU | 50 | -7.282  | 1.114  | -5.160 | 1.00 | 0.00 |
| ATOM | 782 | CG   | LEU | 50 | -9.327  | 1.343  | -5.823 | 1.00 | 0.00 |
| ATOM | 783 | HG   | LEU | 50 | -10.266 | 0.843  | -5.586 | 1.00 | 0.00 |
| ATOM | 784 | CD1  | LEU | 50 | -9.555  | 2.858  | -5.876 | 1.00 | 0.00 |
| ATOM | 785 | HD11 | LEU | 50 | -8.617  | 3.359  | -6.114 | 1.00 | 0.00 |
| ATOM | 786 | HD12 | LEU | 50 | -10.294 | 3.089  | -6.644 | 1.00 | 0.00 |
| ATOM | 787 | HD13 | LEU | 50 | -9.917  | 3.206  | -4.909 | 1.00 | 0.00 |
| ATOM | 788 | CD2  | LEU | 50 | -8.877  | 0.814  | -7.187 | 1.00 | 0.00 |
| ATOM | 789 | HD21 | LEU | 50 | -8.752  | -0.267 | -7.135 | 1.00 | 0.00 |
| ATOM | 790 | HD22 | LEU | 50 | -9.629  | 1.057  | -7.938 | 1.00 | 0.00 |
| ATOM | 791 | HD23 | LEU | 50 | -7.929  | 1.276  | -7.462 | 1.00 | 0.00 |
| ATOM | 792 | C    | LEU | 50 | -7.116  | -0.989 | -3.706 | 1.00 | 0.00 |
| ATOM | 793 | O    | LEU | 50 | -6.432  | -1.583 | -4.518 | 1.00 | 0.00 |

|      |     |     |     |    |        |        |        |      |      |
|------|-----|-----|-----|----|--------|--------|--------|------|------|
| ATOM | 794 | N   | CYX | 51 | -6.777 | -0.886 | -2.418 | 1.00 | 0.00 |
| ATOM | 795 | H   | CYX | 51 | -7.352 | -0.325 | -1.806 | 1.00 | 0.00 |
| ATOM | 796 | CA  | CYX | 51 | -5.590 | -1.496 | -1.873 | 1.00 | 0.00 |
| ATOM | 797 | HA  | CYX | 51 | -4.817 | -1.557 | -2.639 | 1.00 | 0.00 |
| ATOM | 798 | CB  | CYX | 51 | -5.064 | -0.669 | -0.720 | 1.00 | 0.00 |
| ATOM | 799 | HB2 | CYX | 51 | -3.978 | -0.750 | -0.680 | 1.00 | 0.00 |
| ATOM | 800 | HB3 | CYX | 51 | -5.344 | 0.375  | -0.864 | 1.00 | 0.00 |
| ATOM | 801 | SG  | CYX | 51 | -5.620 | -1.052 | 0.972  | 1.00 | 0.00 |
| ATOM | 802 | C   | CYX | 51 | -5.883 | -2.904 | -1.435 | 1.00 | 0.00 |
| ATOM | 803 | O   | CYX | 51 | -5.175 | -3.783 | -1.882 | 1.00 | 0.00 |
| ATOM | 804 | N   | CYX | 52 | -6.989 | -3.127 | -0.713 | 1.00 | 0.00 |
| ATOM | 805 | H   | CYX | 52 | -7.525 | -2.334 | -0.390 | 1.00 | 0.00 |
| ATOM | 806 | CA  | CYX | 52 | -7.398 | -4.456 | -0.289 | 1.00 | 0.00 |
| ATOM | 807 | HA  | CYX | 52 | -6.537 | -5.006 | 0.091  | 1.00 | 0.00 |
| ATOM | 808 | CB  | CYX | 52 | -8.449 | -4.357 | 0.825  | 1.00 | 0.00 |
| ATOM | 809 | HB2 | CYX | 52 | -9.039 | -3.450 | 0.689  | 1.00 | 0.00 |
| ATOM | 810 | HB3 | CYX | 52 | -9.105 | -5.226 | 0.784  | 1.00 | 0.00 |
| ATOM | 811 | SG  | CYX | 52 | -7.701 | -4.340 | 2.486  | 1.00 | 0.00 |
| ATOM | 812 | C   | CYX | 52 | -7.894 | -5.267 | -1.491 | 1.00 | 0.00 |
| ATOM | 813 | O   | CYX | 52 | -8.228 | -6.434 | -1.349 | 1.00 | 0.00 |
| ATOM | 814 | N   | MET | 53 | -7.953 | -4.654 | -2.672 | 1.00 | 0.00 |
| ATOM | 815 | H   | MET | 53 | -7.630 | -3.697 | -2.708 | 1.00 | 0.00 |



|      |     |     |     |    |         |        |        |      |      |
|------|-----|-----|-----|----|---------|--------|--------|------|------|
| ATOM | 816 | CA  | MET | 53 | -8.454  | -5.250 | -3.881 | 1.00 | 0.00 |
| ATOM | 817 | HA  | MET | 53 | -9.112  | -6.081 | -3.631 | 1.00 | 0.00 |
| ATOM | 818 | CB  | MET | 53 | -9.244  | -4.234 | -4.713 | 1.00 | 0.00 |
| ATOM | 819 | HB2 | MET | 53 | -10.205 | -4.061 | -4.229 | 1.00 | 0.00 |
| ATOM | 820 | HB3 | MET | 53 | -8.681  | -3.300 | -4.746 | 1.00 | 0.00 |
| ATOM | 821 | CG  | MET | 53 | -9.474  | -4.735 | -6.128 | 1.00 | 0.00 |
| ATOM | 822 | HG2 | MET | 53 | -9.235  | -5.797 | -6.176 | 1.00 | 0.00 |
| ATOM | 823 | HG3 | MET | 53 | -10.520 | -4.585 | -6.396 | 1.00 | 0.00 |
| ATOM | 824 | SD  | MET | 53 | -8.428  | -3.839 | -7.298 | 1.00 | 0.00 |
| ATOM | 825 | CE  | MET | 53 | -8.104  | -5.179 | -8.463 | 1.00 | 0.00 |
| ATOM | 826 | HE1 | MET | 53 | -9.046  | -5.534 | -8.880 | 1.00 | 0.00 |
| ATOM | 827 | HE2 | MET | 53 | -7.465  | -4.814 | -9.268 | 1.00 | 0.00 |
| ATOM | 828 | HE3 | MET | 53 | -7.604  | -5.998 | -7.946 | 1.00 | 0.00 |
| ATOM | 829 | C   | MET | 53 | -7.264  | -5.755 | -4.660 | 1.00 | 0.00 |
| ATOM | 830 | O   | MET | 53 | -7.252  | -6.909 | -5.054 | 1.00 | 0.00 |
| ATOM | 831 | N   | GLN | 54 | -6.301  | -4.879 | -4.938 | 1.00 | 0.00 |
| ATOM | 832 | H   | GLN | 54 | -6.357  | -3.925 | -4.610 | 1.00 | 0.00 |
| ATOM | 833 | CA  | GLN | 54 | -5.142  | -5.271 | -5.710 | 1.00 | 0.00 |
| ATOM | 834 | HA  | GLN | 54 | -5.458  | -5.809 | -6.604 | 1.00 | 0.00 |
| ATOM | 835 | CB  | GLN | 54 | -4.352  | -4.054 | -6.134 | 1.00 | 0.00 |
| ATOM | 836 | HB2 | GLN | 54 | -4.439  | -3.303 | -5.349 | 1.00 | 0.00 |
| ATOM | 837 | HB3 | GLN | 54 | -3.308  | -4.348 | -6.240 | 1.00 | 0.00 |

|      |     |      |     |    |        |        |        |      |      |
|------|-----|------|-----|----|--------|--------|--------|------|------|
| ATOM | 838 | CG   | GLN | 54 | -4.848 | -3.474 | -7.444 | 1.00 | 0.00 |
| ATOM | 839 | HG2  | GLN | 54 | -4.100 | -3.661 | -8.215 | 1.00 | 0.00 |
| ATOM | 840 | HG3  | GLN | 54 | -5.773 | -3.989 | -7.703 | 1.00 | 0.00 |
| ATOM | 841 | CD   | GLN | 54 | -5.124 | -1.979 | -7.388 | 1.00 | 0.00 |
| ATOM | 842 | OE1  | GLN | 54 | -4.432 | -1.168 | -6.813 | 1.00 | 0.00 |
| ATOM | 843 | NE2  | GLN | 54 | -6.176 | -1.535 | -8.017 | 1.00 | 0.00 |
| ATOM | 844 | HE21 | GLN | 54 | -6.391 | -0.548 | -8.002 | 1.00 | 0.00 |
| ATOM | 845 | HE22 | GLN | 54 | -6.771 | -2.179 | -8.517 | 1.00 | 0.00 |
| ATOM | 846 | C    | GLN | 54 | -4.241 | -6.153 | -4.885 | 1.00 | 0.00 |
| ATOM | 847 | O    | GLN | 54 | -3.627 | -7.035 | -5.454 | 1.00 | 0.00 |
| ATOM | 848 | N    | LEU | 55 | -4.197 | -5.979 | -3.562 | 1.00 | 0.00 |
| ATOM | 849 | H    | LEU | 55 | -4.751 | -5.249 | -3.137 | 1.00 | 0.00 |
| ATOM | 850 | CA   | LEU | 55 | -3.363 | -6.802 | -2.702 | 1.00 | 0.00 |
| ATOM | 851 | HA   | LEU | 55 | -2.309 | -6.669 | -2.949 | 1.00 | 0.00 |
| ATOM | 852 | CB   | LEU | 55 | -3.580 | -6.382 | -1.258 | 1.00 | 0.00 |
| ATOM | 853 | HB2  | LEU | 55 | -4.553 | -5.893 | -1.297 | 1.00 | 0.00 |
| ATOM | 854 | HB3  | LEU | 55 | -3.641 | -7.262 | -0.618 | 1.00 | 0.00 |
| ATOM | 855 | CG   | LEU | 55 | -2.534 | -5.401 | -0.685 | 1.00 | 0.00 |
| ATOM | 856 | HG   | LEU | 55 | -1.984 | -4.976 | -1.526 | 1.00 | 0.00 |
| ATOM | 857 | CD1  | LEU | 55 | -3.159 | -4.266 | 0.144  | 1.00 | 0.00 |
| ATOM | 858 | HD11 | LEU | 55 | -3.708 | -4.689 | 0.984  | 1.00 | 0.00 |
| ATOM | 859 | HD12 | LEU | 55 | -2.371 | -3.612 | 0.517  | 1.00 | 0.00 |

|      |     |      |     |    |        |         |        |      |      |
|------|-----|------|-----|----|--------|---------|--------|------|------|
| ATOM | 860 | HD13 | LEU | 55 | -3.841 | -3.691  | -0.483 | 1.00 | 0.00 |
| ATOM | 861 | CD2  | LEU | 55 | -1.476 | -6.144  | 0.136  | 1.00 | 0.00 |
| ATOM | 862 | HD21 | LEU | 55 | -0.965 | -6.867  | -0.499 | 1.00 | 0.00 |
| ATOM | 863 | HD22 | LEU | 55 | -0.752 | -5.429  | 0.527  | 1.00 | 0.00 |
| ATOM | 864 | HD23 | LEU | 55 | -1.957 | -6.664  | 0.964  | 1.00 | 0.00 |
| ATOM | 865 | C    | LEU | 55 | -3.738 | -8.264  | -2.888 | 1.00 | 0.00 |
| ATOM | 866 | O    | LEU | 55 | -2.889 | -9.120  | -2.742 | 1.00 | 0.00 |
| ATOM | 867 | N    | LYS | 56 | -4.987 | -8.542  | -3.263 | 1.00 | 0.00 |
| ATOM | 868 | H    | LYS | 56 | -5.693 | -7.820  | -3.224 | 1.00 | 0.00 |
| ATOM | 869 | CA   | LYS | 56 | -5.395 | -9.880  | -3.625 | 1.00 | 0.00 |
| ATOM | 870 | HA   | LYS | 56 | -5.077 | -10.597 | -2.869 | 1.00 | 0.00 |
| ATOM | 871 | CB   | LYS | 56 | -6.918 | -9.917  | -3.723 | 1.00 | 0.00 |
| ATOM | 872 | HB2  | LYS | 56 | -7.340 | -9.669  | -2.750 | 1.00 | 0.00 |
| ATOM | 873 | HB3  | LYS | 56 | -7.242 | -9.179  | -4.458 | 1.00 | 0.00 |
| ATOM | 874 | CG   | LYS | 56 | -7.400 | -11.307 | -4.149 | 1.00 | 0.00 |
| ATOM | 875 | HG2  | LYS | 56 | -7.703 | -11.269 | -5.196 | 1.00 | 0.00 |
| ATOM | 876 | HG3  | LYS | 56 | -6.579 | -12.015 | -4.034 | 1.00 | 0.00 |
| ATOM | 877 | CD   | LYS | 56 | -8.584 | -11.756 | -3.292 | 1.00 | 0.00 |
| ATOM | 878 | HD2  | LYS | 56 | -8.208 | -12.221 | -2.382 | 1.00 | 0.00 |
| ATOM | 879 | HD3  | LYS | 56 | -9.186 | -10.885 | -3.033 | 1.00 | 0.00 |
| ATOM | 880 | CE   | LYS | 56 | -9.447 | -12.762 | -4.061 | 1.00 | 0.00 |
| ATOM | 881 | HE2  | LYS | 56 | -9.400 | -12.534 | -5.126 | 1.00 | 0.00 |

|      |     |          |    |         |         |         |      |      |
|------|-----|----------|----|---------|---------|---------|------|------|
| ATOM | 882 | HE3 LYS  | 56 | -9.065  | -13.768 | -3.888  | 1.00 | 0.00 |
| ATOM | 883 | NZ LYS   | 56 | -10.854 | -12.682 | -3.601  | 1.00 | 0.00 |
| ATOM | 884 | HZ1 LYS  | 56 | -11.208 | -11.750 | -3.762  | 1.00 | 0.00 |
| ATOM | 885 | HZ2 LYS  | 56 | -11.414 | -13.348 | -4.114  | 1.00 | 0.00 |
| ATOM | 886 | HZ3 LYS  | 56 | -10.898 | -12.893 | -2.615  | 1.00 | 0.00 |
| ATOM | 887 | C LYS    | 56 | -4.717  | -10.369 | -4.902  | 1.00 | 0.00 |
| ATOM | 888 | O LYS    | 56 | -4.331  | -11.524 | -4.954  | 1.00 | 0.00 |
| ATOM | 889 | N ASN    | 57 | -4.681  | -9.532  | -5.939  | 1.00 | 0.00 |
| ATOM | 890 | H ASN    | 57 | -5.205  | -8.669  | -5.908  | 1.00 | 0.00 |
| ATOM | 891 | CA ASN   | 57 | -3.937  | -9.840  | -7.143  | 1.00 | 0.00 |
| ATOM | 892 | HA ASN   | 57 | -4.370  | -10.712 | -7.632  | 1.00 | 0.00 |
| ATOM | 893 | CB ASN   | 57 | -3.983  | -8.652  | -8.125  | 1.00 | 0.00 |
| ATOM | 894 | HB2 ASN  | 57 | -4.287  | -7.732  | -7.626  | 1.00 | 0.00 |
| ATOM | 895 | HB3 ASN  | 57 | -2.966  | -8.541  | -8.501  | 1.00 | 0.00 |
| ATOM | 896 | CG ASN   | 57 | -4.906  | -8.893  | -9.295  | 1.00 | 0.00 |
| ATOM | 897 | OD1 ASN  | 57 | -5.319  | -9.990  | -9.621  | 1.00 | 0.00 |
| ATOM | 898 | ND2 ASN  | 57 | -5.322  | -7.822  | -9.931  | 1.00 | 0.00 |
| ATOM | 899 | HD21 ASN | 57 | -5.942  | -7.917  | -10.723 | 1.00 | 0.00 |
| ATOM | 900 | HD22 ASN | 57 | -5.020  | -6.907  | -9.626  | 1.00 | 0.00 |
| ATOM | 901 | C ASN    | 57 | -2.474  | -10.189 | -6.868  | 1.00 | 0.00 |
| ATOM | 902 | O ASN    | 57 | -1.873  | -10.883 | -7.680  | 1.00 | 0.00 |
| ATOM | 903 | N LEU    | 58 | -1.897  | -9.576  | -5.828  | 1.00 | 0.00 |

|      |     |      |     |    |        |         |        |      |      |
|------|-----|------|-----|----|--------|---------|--------|------|------|
| ATOM | 904 | H    | LEU | 58 | -2.378 | -8.817  | -5.366 | 1.00 | 0.00 |
| ATOM | 905 | CA   | LEU | 58 | -0.547 | -9.879  | -5.419 | 1.00 | 0.00 |
| ATOM | 906 | HA   | LEU | 58 | 0.130  | -9.822  | -6.272 | 1.00 | 0.00 |
| ATOM | 907 | CB   | LEU | 58 | -0.093 | -8.857  | -4.363 | 1.00 | 0.00 |
| ATOM | 908 | HB2  | LEU | 58 | -0.984 | -8.596  | -3.792 | 1.00 | 0.00 |
| ATOM | 909 | HB3  | LEU | 58 | 0.625  | -9.353  | -3.710 | 1.00 | 0.00 |
| ATOM | 910 | CG   | LEU | 58 | 0.530  | -7.595  | -4.932 | 1.00 | 0.00 |
| ATOM | 911 | HG   | LEU | 58 | -0.224 | -7.046  | -5.497 | 1.00 | 0.00 |
| ATOM | 912 | CD1  | LEU | 58 | 1.061  | -6.711  | -3.797 | 1.00 | 0.00 |
| ATOM | 913 | HD11 | LEU | 58 | 1.816  | -7.258  | -3.232 | 1.00 | 0.00 |
| ATOM | 914 | HD12 | LEU | 58 | 1.506  | -5.808  | -4.217 | 1.00 | 0.00 |
| ATOM | 915 | HD13 | LEU | 58 | 0.240  | -6.436  | -3.135 | 1.00 | 0.00 |
| ATOM | 916 | CD2  | LEU | 58 | 1.654  | -7.940  | -5.864 | 1.00 | 0.00 |
| ATOM | 917 | HD21 | LEU | 58 | 1.273  | -8.548  | -6.685 | 1.00 | 0.00 |
| ATOM | 918 | HD22 | LEU | 58 | 2.090  | -7.024  | -6.264 | 1.00 | 0.00 |
| ATOM | 919 | HD23 | LEU | 58 | 2.417  | -8.498  | -5.323 | 1.00 | 0.00 |
| ATOM | 920 | C    | LEU | 58 | -0.413 | -11.333 | -4.947 | 1.00 | 0.00 |
| ATOM | 921 | O    | LEU | 58 | -1.323 | -12.152 | -5.043 | 1.00 | 0.00 |
| ATOM | 922 | N    | ASP | 59 | 0.762  | -11.663 | -4.434 | 1.00 | 0.00 |
| ATOM | 923 | H    | ASP | 59 | 1.508  | -10.983 | -4.383 | 1.00 | 0.00 |
| ATOM | 924 | CA   | ASP | 59 | 1.014  | -12.994 | -3.938 | 1.00 | 0.00 |
| ATOM | 925 | HA   | ASP | 59 | 0.337  | -13.702 | -4.414 | 1.00 | 0.00 |

|      |     |     |     |    |        |         |        |      |      |
|------|-----|-----|-----|----|--------|---------|--------|------|------|
| ATOM | 926 | CB  | ASP | 59 | 2.449  | -13.408 | -4.248 | 1.00 | 0.00 |
| ATOM | 927 | HB2 | ASP | 59 | 2.990  | -12.647 | -3.686 | 1.00 | 0.00 |
| ATOM | 928 | HB3 | ASP | 59 | 2.730  | -14.396 | -3.885 | 1.00 | 0.00 |
| ATOM | 929 | CG  | ASP | 59 | 2.800  | -13.292 | -5.728 | 1.00 | 0.00 |
| ATOM | 930 | OD1 | ASP | 59 | 2.039  | -13.840 | -6.544 | 1.00 | 0.00 |
| ATOM | 931 | OD2 | ASP | 59 | 3.923  | -12.812 | -5.987 | 1.00 | 0.00 |
| ATOM | 932 | C   | ASP | 59 | 0.800  | -13.021 | -2.438 | 1.00 | 0.00 |
| ATOM | 933 | O   | ASP | 59 | 1.130  | -12.057 | -1.744 | 1.00 | 0.00 |
| ATOM | 934 | N   | GLU | 60 | 0.558  | -14.212 | -1.895 | 1.00 | 0.00 |
| ATOM | 935 | H   | GLU | 60 | 0.489  | -15.028 | -2.486 | 1.00 | 0.00 |
| ATOM | 936 | CA  | GLU | 60 | 0.360  | -14.379 | -0.455 | 1.00 | 0.00 |
| ATOM | 937 | HA  | GLU | 60 | -0.303 | -13.599 | -0.081 | 1.00 | 0.00 |
| ATOM | 938 | CB  | GLU | 60 | -0.270 | -15.745 | -0.154 | 1.00 | 0.00 |
| ATOM | 939 | HB2 | GLU | 60 | -0.623 | -16.188 | -1.085 | 1.00 | 0.00 |
| ATOM | 940 | HB3 | GLU | 60 | 0.482  | -16.394 | 0.295  | 1.00 | 0.00 |
| ATOM | 941 | CG  | GLU | 60 | -1.449 | -15.582 | 0.814  | 1.00 | 0.00 |
| ATOM | 942 | HG2 | GLU | 60 | -1.167 | -14.811 | 1.532  | 1.00 | 0.00 |
| ATOM | 943 | HG3 | GLU | 60 | -2.344 | -15.267 | 0.277  | 1.00 | 0.00 |
| ATOM | 944 | CD  | GLU | 60 | -1.732 | -16.893 | 1.556  | 1.00 | 0.00 |
| ATOM | 945 | OE1 | GLU | 60 | -1.119 | -17.085 | 2.631  | 1.00 | 0.00 |
| ATOM | 946 | OE2 | GLU | 60 | -2.521 | -17.698 | 1.017  | 1.00 | 0.00 |
| ATOM | 947 | C   | GLU | 60 | 1.694  | -14.260 | 0.282  | 1.00 | 0.00 |

|      |     |     |     |    |       |         |        |      |      |
|------|-----|-----|-----|----|-------|---------|--------|------|------|
| ATOM | 948 | O   | GLU | 60 | 1.757 | -13.915 | 1.457  | 1.00 | 0.00 |
| ATOM | 949 | N   | LYS | 61 | 2.794 | -14.505 | -0.438 | 1.00 | 0.00 |
| ATOM | 950 | H   | LYS | 61 | 2.700 | -14.882 | -1.370 | 1.00 | 0.00 |
| ATOM | 951 | CA  | LYS | 61 | 4.119 | -14.336 | 0.100  | 1.00 | 0.00 |
| ATOM | 952 | HA  | LYS | 61 | 4.108 | -14.454 | 1.183  | 1.00 | 0.00 |
| ATOM | 953 | CB  | LYS | 61 | 5.045 | -15.396 | -0.498 | 1.00 | 0.00 |
| ATOM | 954 | HB2 | LYS | 61 | 5.951 | -15.437 | 0.107  | 1.00 | 0.00 |
| ATOM | 955 | HB3 | LYS | 61 | 4.535 | -16.358 | -0.454 | 1.00 | 0.00 |
| ATOM | 956 | CG  | LYS | 61 | 5.417 | -15.081 | -1.953 | 1.00 | 0.00 |
| ATOM | 957 | HG2 | LYS | 61 | 4.505 | -14.872 | -2.513 | 1.00 | 0.00 |
| ATOM | 958 | HG3 | LYS | 61 | 6.062 | -14.202 | -1.970 | 1.00 | 0.00 |
| ATOM | 959 | CD  | LYS | 61 | 6.150 | -16.263 | -2.595 | 1.00 | 0.00 |
| ATOM | 960 | HD2 | LYS | 61 | 7.078 | -15.904 | -3.041 | 1.00 | 0.00 |
| ATOM | 961 | HD3 | LYS | 61 | 6.378 | -16.999 | -1.825 | 1.00 | 0.00 |
| ATOM | 962 | CE  | LYS | 61 | 5.279 | -16.911 | -3.679 | 1.00 | 0.00 |
| ATOM | 963 | HE2 | LYS | 61 | 4.622 | -16.152 | -4.105 | 1.00 | 0.00 |
| ATOM | 964 | HE3 | LYS | 61 | 5.926 | -17.310 | -4.461 | 1.00 | 0.00 |
| ATOM | 965 | NZ  | LYS | 61 | 4.461 | -18.008 | -3.105 | 1.00 | 0.00 |
| ATOM | 966 | HZ1 | LYS | 61 | 3.862 | -17.637 | -2.382 | 1.00 | 0.00 |
| ATOM | 967 | HZ2 | LYS | 61 | 3.895 | -18.421 | -3.833 | 1.00 | 0.00 |
| ATOM | 968 | HZ3 | LYS | 61 | 5.070 | -18.711 | -2.711 | 1.00 | 0.00 |
| ATOM | 969 | C   | LYS | 61 | 4.606 | -12.932 | -0.148 | 1.00 | 0.00 |

|      |     |     |     |    |        |         |        |      |      |
|------|-----|-----|-----|----|--------|---------|--------|------|------|
| ATOM | 970 | O   | LYS | 61 | 5.672  | -12.639 | 0.338  | 1.00 | 0.00 |
| ATOM | 971 | N   | CYX | 62 | 3.924  | -12.118 | -0.947 | 1.00 | 0.00 |
| ATOM | 972 | H   | CYX | 62 | 3.140  | -12.512 | -1.447 | 1.00 | 0.00 |
| ATOM | 973 | CA  | CYX | 62 | 4.256  | -10.731 | -1.179 | 1.00 | 0.00 |
| ATOM | 974 | HA  | CYX | 62 | 5.285  | -10.529 | -0.883 | 1.00 | 0.00 |
| ATOM | 975 | CB  | CYX | 62 | 4.110  | -10.429 | -2.656 | 1.00 | 0.00 |
| ATOM | 976 | HB2 | CYX | 62 | 3.159  | -10.822 | -3.016 | 1.00 | 0.00 |
| ATOM | 977 | HB3 | CYX | 62 | 4.139  | -9.350  | -2.812 | 1.00 | 0.00 |
| ATOM | 978 | SG  | CYX | 62 | 5.404  | -11.177 | -3.683 | 1.00 | 0.00 |
| ATOM | 979 | C   | CYX | 62 | 3.347  | -9.837  | -0.333 | 1.00 | 0.00 |
| ATOM | 980 | O   | CYX | 62 | 3.659  | -8.685  | -0.060 | 1.00 | 0.00 |
| ATOM | 981 | N   | MET | 63 | 2.293  | -10.375 | 0.246  | 1.00 | 0.00 |
| ATOM | 982 | H   | MET | 63 | 2.098  | -11.354 | 0.093  | 1.00 | 0.00 |
| ATOM | 983 | CA  | MET | 63 | 1.382  | -9.617  | 1.059  | 1.00 | 0.00 |
| ATOM | 984 | HA  | MET | 63 | 1.291  | -8.596  | 0.688  | 1.00 | 0.00 |
| ATOM | 985 | CB  | MET | 63 | 0.024  | -10.276 | 0.999  | 1.00 | 0.00 |
| ATOM | 986 | HB2 | MET | 63 | 0.166  | -11.348 | 1.135  | 1.00 | 0.00 |
| ATOM | 987 | HB3 | MET | 63 | -0.575 | -9.882  | 1.819  | 1.00 | 0.00 |
| ATOM | 988 | CG  | MET | 63 | -0.692 | -10.024 | -0.316 | 1.00 | 0.00 |
| ATOM | 989 | HG2 | MET | 63 | -1.335 | -9.153  | -0.190 | 1.00 | 0.00 |
| ATOM | 990 | HG3 | MET | 63 | 0.060  | -9.812  | -1.077 | 1.00 | 0.00 |
| ATOM | 991 | SD  | MET | 63 | -1.692 | -11.429 | -0.846 | 1.00 | 0.00 |



|      |      |     |     |    |        |         |       |      |      |
|------|------|-----|-----|----|--------|---------|-------|------|------|
| ATOM | 992  | CE  | MET | 63 | -2.550 | -11.807 | 0.685 | 1.00 | 0.00 |
| ATOM | 993  | HE1 | MET | 63 | -3.135 | -10.942 | 0.997 | 1.00 | 0.00 |
| ATOM | 994  | HE2 | MET | 63 | -3.214 | -12.657 | 0.529 | 1.00 | 0.00 |
| ATOM | 995  | HE3 | MET | 63 | -1.822 | -12.051 | 1.459 | 1.00 | 0.00 |
| ATOM | 996  | C   | MET | 63 | 1.918  | -9.565  | 2.465 | 1.00 | 0.00 |
| ATOM | 997  | O   | MET | 63 | 1.340  | -10.075 | 3.382 | 1.00 | 0.00 |
| ATOM | 998  | N   | CYX | 64 | 3.062  | -8.978  | 2.708 | 1.00 | 0.00 |
| ATOM | 999  | H   | CYX | 64 | 3.559  | -8.595  | 1.915 | 1.00 | 0.00 |
| ATOM | 1000 | CA  | CYX | 64 | 3.692  | -8.905  | 4.018 | 1.00 | 0.00 |
| ATOM | 1001 | HA  | CYX | 64 | 3.118  | -8.213  | 4.634 | 1.00 | 0.00 |
| ATOM | 1002 | CB  | CYX | 64 | 3.768  | -10.264 | 4.742 | 1.00 | 0.00 |
| ATOM | 1003 | HB2 | CYX | 64 | 2.951  | -10.340 | 5.459 | 1.00 | 0.00 |
| ATOM | 1004 | HB3 | CYX | 64 | 3.686  | -11.069 | 4.012 | 1.00 | 0.00 |
| ATOM | 1005 | SG  | CYX | 64 | 5.310  | -10.578 | 5.694 | 1.00 | 0.00 |
| ATOM | 1006 | C   | CYX | 64 | 5.066  | -8.310  | 3.835 | 1.00 | 0.00 |
| ATOM | 1007 | O   | CYX | 64 | 5.328  | -7.234  | 4.374 | 1.00 | 0.00 |
| ATOM | 1008 | N   | PRO | 65 | 5.917  | -8.976  | 3.033 | 1.00 | 0.00 |
| ATOM | 1009 | CD  | PRO | 65 | 5.658  | -10.225 | 2.329 | 1.00 | 0.00 |
| ATOM | 1010 | HD2 | PRO | 65 | 4.919  | -10.018 | 1.555 | 1.00 | 0.00 |
| ATOM | 1011 | HD3 | PRO | 65 | 5.242  | -10.928 | 3.050 | 1.00 | 0.00 |
| ATOM | 1012 | CG  | PRO | 65 | 6.979  | -10.695 | 1.760 | 1.00 | 0.00 |
| ATOM | 1013 | HG2 | PRO | 65 | 6.911  | -10.706 | 0.672 | 1.00 | 0.00 |

|      |      |         |    |       |         |        |      |      |
|------|------|---------|----|-------|---------|--------|------|------|
| ATOM | 1014 | HG3 PRO | 65 | 7.180 | -11.703 | 2.121  | 1.00 | 0.00 |
| ATOM | 1015 | CB PRO  | 65 | 8.041 | -9.729  | 2.237  | 1.00 | 0.00 |
| ATOM | 1016 | HB2 PRO | 65 | 8.642 | -9.423  | 1.380  | 1.00 | 0.00 |
| ATOM | 1017 | HB3 PRO | 65 | 8.691 | -10.146 | 3.006  | 1.00 | 0.00 |
| ATOM | 1018 | CA PRO  | 65 | 7.277 | -8.520  | 2.796  | 1.00 | 0.00 |
| ATOM | 1019 | HA PRO  | 65 | 7.713 | -8.200  | 3.742  | 1.00 | 0.00 |
| ATOM | 1020 | C PRO   | 65 | 7.288 | -7.355  | 1.813  | 1.00 | 0.00 |
| ATOM | 1021 | O PRO   | 65 | 8.093 | -6.445  | 1.953  | 1.00 | 0.00 |
| ATOM | 1022 | N ALA   | 66 | 6.376 | -7.373  | 0.841  | 1.00 | 0.00 |
| ATOM | 1023 | H ALA   | 66 | 5.751 | -8.162  | 0.760  | 1.00 | 0.00 |
| ATOM | 1024 | CA ALA  | 66 | 6.262 | -6.318  | -0.116 | 1.00 | 0.00 |
| ATOM | 1025 | HA ALA  | 66 | 7.232 | -6.044  | -0.533 | 1.00 | 0.00 |
| ATOM | 1026 | CB ALA  | 66 | 5.351 | -6.741  | -1.248 | 1.00 | 0.00 |
| ATOM | 1027 | HB1 ALA | 66 | 4.374 | -7.009  | -0.848 | 1.00 | 0.00 |
| ATOM | 1028 | HB2 ALA | 66 | 5.241 | -5.917  | -1.954 | 1.00 | 0.00 |
| ATOM | 1029 | HB3 ALA | 66 | 5.782 | -7.601  | -1.760 | 1.00 | 0.00 |
| ATOM | 1030 | C ALA   | 66 | 5.715 | -5.105  | 0.576  | 1.00 | 0.00 |
| ATOM | 1031 | O ALA   | 66 | 6.320 | -4.074  | 0.429  | 1.00 | 0.00 |
| ATOM | 1032 | N ILE   | 67 | 4.633 | -5.207  | 1.343  | 1.00 | 0.00 |
| ATOM | 1033 | H ILE   | 67 | 4.201 | -6.115  | 1.432  | 1.00 | 0.00 |
| ATOM | 1034 | CA ILE  | 67 | 4.034 | -4.088  | 2.049  | 1.00 | 0.00 |
| ATOM | 1035 | HA ILE  | 67 | 3.454 | -3.423  | 1.408  | 1.00 | 0.00 |

|      |      |      |     |    |        |        |       |      |      |
|------|------|------|-----|----|--------|--------|-------|------|------|
| ATOM | 1036 | CB   | ILE | 67 | 3.156  | -4.591 | 3.186 | 1.00 | 0.00 |
| ATOM | 1037 | HB   | ILE | 67 | 3.695  | -5.360 | 3.737 | 1.00 | 0.00 |
| ATOM | 1038 | CG2  | ILE | 67 | 2.796  | -3.434 | 4.138 | 1.00 | 0.00 |
| ATOM | 1039 | HG21 | ILE | 67 | 2.257  | -2.663 | 3.586 | 1.00 | 0.00 |
| ATOM | 1040 | HG22 | ILE | 67 | 2.168  | -3.809 | 4.945 | 1.00 | 0.00 |
| ATOM | 1041 | HG23 | ILE | 67 | 3.709  | -3.009 | 4.555 | 1.00 | 0.00 |
| ATOM | 1042 | CG1  | ILE | 67 | 1.926  | -5.321 | 2.613 | 1.00 | 0.00 |
| ATOM | 1043 | HG12 | ILE | 67 | 1.856  | -5.084 | 1.551 | 1.00 | 0.00 |
| ATOM | 1044 | HG13 | ILE | 67 | 2.080  | -6.393 | 2.736 | 1.00 | 0.00 |
| ATOM | 1045 | CD1  | ILE | 67 | 0.634  | -4.910 | 3.312 | 1.00 | 0.00 |
| ATOM | 1046 | HD11 | ILE | 67 | 0.479  | -3.838 | 3.188 | 1.00 | 0.00 |
| ATOM | 1047 | HD12 | ILE | 67 | -0.205 | -5.450 | 2.873 | 1.00 | 0.00 |
| ATOM | 1048 | HD13 | ILE | 67 | 0.704  | -5.146 | 4.373 | 1.00 | 0.00 |
| ATOM | 1049 | C    | ILE | 67 | 5.121  | -3.190 | 2.617 | 1.00 | 0.00 |
| ATOM | 1050 | O    | ILE | 67 | 5.151  | -2.022 | 2.347 | 1.00 | 0.00 |
| ATOM | 1051 | N    | MET | 68 | 6.073  | -3.693 | 3.370 | 1.00 | 0.00 |
| ATOM | 1052 | H    | MET | 68 | 6.044  | -4.673 | 3.612 | 1.00 | 0.00 |
| ATOM | 1053 | CA   | MET | 68 | 7.172  | -2.889 | 3.882 | 1.00 | 0.00 |
| ATOM | 1054 | HA   | MET | 68 | 6.833  | -2.239 | 4.689 | 1.00 | 0.00 |
| ATOM | 1055 | CB   | MET | 68 | 8.234  | -3.819 | 4.424 | 1.00 | 0.00 |
| ATOM | 1056 | HB2  | MET | 68 | 8.558  | -4.481 | 3.621 | 1.00 | 0.00 |
| ATOM | 1057 | HB3  | MET | 68 | 9.079  | -3.220 | 4.764 | 1.00 | 0.00 |

|      |      |     |     |    |        |        |        |      |      |
|------|------|-----|-----|----|--------|--------|--------|------|------|
| ATOM | 1058 | CG  | MET | 68 | 7.702  | -4.651 | 5.584  | 1.00 | 0.00 |
| ATOM | 1059 | HG2 | MET | 68 | 7.911  | -4.134 | 6.520  | 1.00 | 0.00 |
| ATOM | 1060 | HG3 | MET | 68 | 6.625  | -4.776 | 5.470  | 1.00 | 0.00 |
| ATOM | 1061 | SD  | MET | 68 | 8.490  | -6.279 | 5.614  | 1.00 | 0.00 |
| ATOM | 1062 | CE  | MET | 68 | 7.321  | -7.142 | 6.682  | 1.00 | 0.00 |
| ATOM | 1063 | HE1 | MET | 68 | 6.332  | -7.129 | 6.223  | 1.00 | 0.00 |
| ATOM | 1064 | HE2 | MET | 68 | 7.645  | -8.173 | 6.817  | 1.00 | 0.00 |
| ATOM | 1065 | HE3 | MET | 68 | 7.278  | -6.645 | 7.651  | 1.00 | 0.00 |
| ATOM | 1066 | C   | MET | 68 | 7.796  | -2.004 | 2.819  | 1.00 | 0.00 |
| ATOM | 1067 | O   | MET | 68 | 7.685  | -0.786 | 2.965  | 1.00 | 0.00 |
| ATOM | 1068 | N   | MET | 69 | 8.250  | -2.625 | 1.717  | 1.00 | 0.00 |
| ATOM | 1069 | H   | MET | 69 | 8.279  | -3.634 | 1.710  | 1.00 | 0.00 |
| ATOM | 1070 | CA  | MET | 69 | 8.752  | -1.918 | 0.561  | 1.00 | 0.00 |
| ATOM | 1071 | HA  | MET | 69 | 9.626  | -1.325 | 0.830  | 1.00 | 0.00 |
| ATOM | 1072 | CB  | MET | 69 | 9.155  | -2.919 | -0.510 | 1.00 | 0.00 |
| ATOM | 1073 | HB2 | MET | 69 | 8.425  | -3.728 | -0.516 | 1.00 | 0.00 |
| ATOM | 1074 | HB3 | MET | 69 | 9.143  | -2.412 | -1.476 | 1.00 | 0.00 |
| ATOM | 1075 | CG  | MET | 69 | 10.535 | -3.486 | -0.255 | 1.00 | 0.00 |
| ATOM | 1076 | HG2 | MET | 69 | 10.573 | -3.904 | 0.750  | 1.00 | 0.00 |
| ATOM | 1077 | HG3 | MET | 69 | 10.742 | -4.271 | -0.983 | 1.00 | 0.00 |
| ATOM | 1078 | SD  | MET | 69 | 11.787 | -2.189 | -0.407 | 1.00 | 0.00 |
| ATOM | 1079 | CE  | MET | 69 | 13.205 | -3.076 | 0.242  | 1.00 | 0.00 |

|      |      |     |     |    |        |        |        |      |      |
|------|------|-----|-----|----|--------|--------|--------|------|------|
| ATOM | 1080 | HE1 | MET | 69 | 13.396 | -3.956 | -0.372 | 1.00 | 0.00 |
| ATOM | 1081 | HE2 | MET | 69 | 14.080 | -2.425 | 0.225  | 1.00 | 0.00 |
| ATOM | 1082 | HE3 | MET | 69 | 13.003 | -3.385 | 1.267  | 1.00 | 0.00 |
| ATOM | 1083 | C   | MET | 69 | 7.772  | -0.914 | -0.040 | 1.00 | 0.00 |
| ATOM | 1084 | O   | MET | 69 | 8.173  | 0.114  | -0.577 | 1.00 | 0.00 |
| ATOM | 1085 | N   | MET | 70 | 6.481  | -1.185 | 0.052  | 1.00 | 0.00 |
| ATOM | 1086 | H   | MET | 70 | 6.209  | -2.088 | 0.411  | 1.00 | 0.00 |
| ATOM | 1087 | CA  | MET | 70 | 5.450  | -0.288 | -0.383 | 1.00 | 0.00 |
| ATOM | 1088 | HA  | MET | 70 | 5.496  | -0.142 | -1.463 | 1.00 | 0.00 |
| ATOM | 1089 | CB  | MET | 70 | 4.101  | -0.893 | -0.031 | 1.00 | 0.00 |
| ATOM | 1090 | HB2 | MET | 70 | 3.482  | -0.816 | -0.925 | 1.00 | 0.00 |
| ATOM | 1091 | HB3 | MET | 70 | 4.280  | -1.943 | 0.197  | 1.00 | 0.00 |
| ATOM | 1092 | CG  | MET | 70 | 3.384  | -0.234 | 1.141  | 1.00 | 0.00 |
| ATOM | 1093 | HG2 | MET | 70 | 4.140  | -0.054 | 1.905  | 1.00 | 0.00 |
| ATOM | 1094 | HG3 | MET | 70 | 3.004  | 0.720  | 0.775  | 1.00 | 0.00 |
| ATOM | 1095 | SD  | MET | 70 | 2.033  | -1.173 | 1.856  | 1.00 | 0.00 |
| ATOM | 1096 | CE  | MET | 70 | 1.127  | 0.139  | 2.642  | 1.00 | 0.00 |
| ATOM | 1097 | HE1 | MET | 70 | 0.813  | 0.865  | 1.891  | 1.00 | 0.00 |
| ATOM | 1098 | HE2 | MET | 70 | 0.248  | -0.272 | 3.138  | 1.00 | 0.00 |
| ATOM | 1099 | HE3 | MET | 70 | 1.763  | 0.631  | 3.378  | 1.00 | 0.00 |
| ATOM | 1100 | C   | MET | 70 | 5.601  | 1.088  | 0.232  | 1.00 | 0.00 |
| ATOM | 1101 | O   | MET | 70 | 5.265  | 2.075  | -0.404 | 1.00 | 0.00 |

|      |      |      |     |    |       |       |       |      |      |
|------|------|------|-----|----|-------|-------|-------|------|------|
| ATOM | 1102 | N    | LEU | 71 | 6.027 | 1.138 | 1.497 | 1.00 | 0.00 |
| ATOM | 1103 | H    | LEU | 71 | 6.172 | 0.267 | 1.987 | 1.00 | 0.00 |
| ATOM | 1104 | CA   | LEU | 71 | 6.179 | 2.372 | 2.233 | 1.00 | 0.00 |
| ATOM | 1105 | HA   | LEU | 71 | 5.722 | 3.190 | 1.676 | 1.00 | 0.00 |
| ATOM | 1106 | CB   | LEU | 71 | 5.504 | 2.275 | 3.601 | 1.00 | 0.00 |
| ATOM | 1107 | HB2  | LEU | 71 | 5.977 | 1.403 | 4.052 | 1.00 | 0.00 |
| ATOM | 1108 | HB3  | LEU | 71 | 5.736 | 3.161 | 4.192 | 1.00 | 0.00 |
| ATOM | 1109 | CG   | LEU | 71 | 3.998 | 2.071 | 3.563 | 1.00 | 0.00 |
| ATOM | 1110 | HG   | LEU | 71 | 3.781 | 1.031 | 3.320 | 1.00 | 0.00 |
| ATOM | 1111 | CD1  | LEU | 71 | 3.405 | 2.407 | 4.904 | 1.00 | 0.00 |
| ATOM | 1112 | HD11 | LEU | 71 | 3.622 | 3.448 | 5.147 | 1.00 | 0.00 |
| ATOM | 1113 | HD12 | LEU | 71 | 2.326 | 2.260 | 4.871 | 1.00 | 0.00 |
| ATOM | 1114 | HD13 | LEU | 71 | 3.838 | 1.759 | 5.665 | 1.00 | 0.00 |
| ATOM | 1115 | CD2  | LEU | 71 | 3.300 | 2.858 | 2.460 | 1.00 | 0.00 |
| ATOM | 1116 | HD21 | LEU | 71 | 3.693 | 2.553 | 1.490 | 1.00 | 0.00 |
| ATOM | 1117 | HD22 | LEU | 71 | 2.228 | 2.662 | 2.495 | 1.00 | 0.00 |
| ATOM | 1118 | HD23 | LEU | 71 | 3.479 | 3.924 | 2.604 | 1.00 | 0.00 |
| ATOM | 1119 | C    | LEU | 71 | 7.655 | 2.698 | 2.294 | 1.00 | 0.00 |
| ATOM | 1120 | O    | LEU | 71 | 8.135 | 3.242 | 3.280 | 1.00 | 0.00 |
| ATOM | 1121 | N    | ASN | 72 | 8.402 | 2.297 | 1.278 | 1.00 | 0.00 |
| ATOM | 1122 | H    | ASN | 72 | 7.963 | 1.734 | 0.563 | 1.00 | 0.00 |
| ATOM | 1123 | CA   | ASN | 72 | 9.812 | 2.587 | 1.152 | 1.00 | 0.00 |

|      |      |      |     |    |        |        |        |      |      |
|------|------|------|-----|----|--------|--------|--------|------|------|
| ATOM | 1124 | HA   | ASN | 72 | 10.132 | 3.265  | 1.943  | 1.00 | 0.00 |
| ATOM | 1125 | CB   | ASN | 72 | 10.607 | 1.293  | 1.269  | 1.00 | 0.00 |
| ATOM | 1126 | HB2  | ASN | 72 | 10.320 | 0.498  | 0.581  | 1.00 | 0.00 |
| ATOM | 1127 | HB3  | ASN | 72 | 11.620 | 1.624  | 1.039  | 1.00 | 0.00 |
| ATOM | 1128 | CG   | ASN | 72 | 10.586 | 0.746  | 2.674  | 1.00 | 0.00 |
| ATOM | 1129 | OD1  | ASN | 72 | 10.420 | -0.423 | 2.939  | 1.00 | 0.00 |
| ATOM | 1130 | ND2  | ASN | 72 | 10.925 | 1.557  | 3.643  | 1.00 | 0.00 |
| ATOM | 1131 | HD21 | ASN | 72 | 10.923 | 1.227  | 4.597  | 1.00 | 0.00 |
| ATOM | 1132 | HD22 | ASN | 72 | 11.187 | 2.510  | 3.432  | 1.00 | 0.00 |
| ATOM | 1133 | C    | ASN | 72 | 10.113 | 3.266  | -0.170 | 1.00 | 0.00 |
| ATOM | 1134 | O    | ASN | 72 | 11.277 | 3.507  | -0.479 | 1.00 | 0.00 |
| ATOM | 1135 | N    | GLU | 73 | 9.071  | 3.517  | -0.958 | 1.00 | 0.00 |
| ATOM | 1136 | H    | GLU | 73 | 8.152  | 3.198  | -0.687 | 1.00 | 0.00 |
| ATOM | 1137 | CA   | GLU | 73 | 9.221  | 4.149  | -2.234 | 1.00 | 0.00 |
| ATOM | 1138 | HA   | GLU | 73 | 9.991  | 3.644  | -2.818 | 1.00 | 0.00 |
| ATOM | 1139 | CB   | GLU | 73 | 7.892  | 4.076  | -3.006 | 1.00 | 0.00 |
| ATOM | 1140 | HB2  | GLU | 73 | 7.130  | 3.635  | -2.364 | 1.00 | 0.00 |
| ATOM | 1141 | HB3  | GLU | 73 | 7.589  | 5.084  | -3.289 | 1.00 | 0.00 |
| ATOM | 1142 | CG   | GLU | 73 | 8.056  | 3.214  | -4.274 | 1.00 | 0.00 |
| ATOM | 1143 | HG2  | GLU | 73 | 9.091  | 3.085  | -4.590 | 1.00 | 0.00 |
| ATOM | 1144 | HG3  | GLU | 73 | 7.652  | 2.254  | -3.953 | 1.00 | 0.00 |
| ATOM | 1145 | CD   | GLU | 73 | 7.228  | 3.749  | -5.446 | 1.00 | 0.00 |

|      |      |     |     |    |        |        |        |      |      |
|------|------|-----|-----|----|--------|--------|--------|------|------|
| ATOM | 1146 | OE1 | GLU | 73 | 6.094  | 4.210  | -5.180 | 1.00 | 0.00 |
| ATOM | 1147 | OE2 | GLU | 73 | 7.795  | 3.819  | -6.559 | 1.00 | 0.00 |
| ATOM | 1148 | C   | GLU | 73 | 9.718  | 5.586  | -2.078 | 1.00 | 0.00 |
| ATOM | 1149 | O   | GLU | 73 | 9.843  | 6.114  | -0.960 | 1.00 | 0.00 |
| ATOM | 1150 | N   | PRO | 74 | 9.943  | 6.278  | -3.205 | 1.00 | 0.00 |
| ATOM | 1151 | CD  | PRO | 74 | 9.787  | 5.792  | -4.568 | 1.00 | 0.00 |
| ATOM | 1152 | HD2 | PRO | 74 | 8.723  | 5.607  | -4.717 | 1.00 | 0.00 |
| ATOM | 1153 | HD3 | PRO | 74 | 10.332 | 4.851  | -4.631 | 1.00 | 0.00 |
| ATOM | 1154 | CG  | PRO | 74 | 10.331 | 6.837  | -5.515 | 1.00 | 0.00 |
| ATOM | 1155 | HG2 | PRO | 74 | 9.526  | 7.219  | -6.144 | 1.00 | 0.00 |
| ATOM | 1156 | HG3 | PRO | 74 | 11.104 | 6.396  | -6.145 | 1.00 | 0.00 |
| ATOM | 1157 | CB  | PRO | 74 | 10.910 | 7.930  | -4.630 | 1.00 | 0.00 |
| ATOM | 1158 | HB2 | PRO | 74 | 10.594 | 8.914  | -4.977 | 1.00 | 0.00 |
| ATOM | 1159 | HB3 | PRO | 74 | 11.999 | 7.882  | -4.621 | 1.00 | 0.00 |
| ATOM | 1160 | CA  | PRO | 74 | 10.360 | 7.672  | -3.216 | 1.00 | 0.00 |
| ATOM | 1161 | HA  | PRO | 74 | 11.180 | 7.785  | -2.508 | 1.00 | 0.00 |
| ATOM | 1162 | C   | PRO | 74 | 9.221  | 8.624  | -2.834 | 1.00 | 0.00 |
| ATOM | 1163 | O   | PRO | 74 | 9.060  | 9.694  | -3.421 | 1.00 | 0.00 |
| ATOM | 1164 | N   | MET | 75 | 8.446  | 8.255  | -1.822 | 1.00 | 0.00 |
| ATOM | 1165 | H   | MET | 75 | 8.640  | 7.374  | -1.369 | 1.00 | 0.00 |
| ATOM | 1166 | CA  | MET | 75 | 7.338  | 9.036  | -1.348 | 1.00 | 0.00 |
| ATOM | 1167 | HA  | MET | 75 | 7.659  | 10.046 | -1.092 | 1.00 | 0.00 |



|      |      |     |     |    |       |        |        |      |      |
|------|------|-----|-----|----|-------|--------|--------|------|------|
| ATOM | 1168 | CB  | MET | 75 | 6.292 | 9.123  | -2.461 | 1.00 | 0.00 |
| ATOM | 1169 | HB2 | MET | 75 | 6.790 | 9.048  | -3.428 | 1.00 | 0.00 |
| ATOM | 1170 | HB3 | MET | 75 | 5.583 | 8.303  | -2.353 | 1.00 | 0.00 |
| ATOM | 1171 | CG  | MET | 75 | 5.550 | 10.448 | -2.375 | 1.00 | 0.00 |
| ATOM | 1172 | HG2 | MET | 75 | 5.806 | 10.939 | -1.436 | 1.00 | 0.00 |
| ATOM | 1173 | HG3 | MET | 75 | 5.854 | 11.081 | -3.210 | 1.00 | 0.00 |
| ATOM | 1174 | SD  | MET | 75 | 3.755 | 10.192 | -2.444 | 1.00 | 0.00 |
| ATOM | 1175 | CE  | MET | 75 | 3.351 | 11.365 | -3.747 | 1.00 | 0.00 |
| ATOM | 1176 | HE1 | MET | 75 | 3.880 | 11.092 | -4.660 | 1.00 | 0.00 |
| ATOM | 1177 | HE2 | MET | 75 | 2.277 | 11.349 | -3.932 | 1.00 | 0.00 |
| ATOM | 1178 | HE3 | MET | 75 | 3.651 | 12.367 | -3.441 | 1.00 | 0.00 |
| ATOM | 1179 | C   | MET | 75 | 6.732 | 8.392  | -0.109 | 1.00 | 0.00 |
| ATOM | 1180 | O   | MET | 75 | 5.526 | 8.441  | 0.087  | 1.00 | 0.00 |
| ATOM | 1181 | N   | TRP | 76 | 7.543 | 7.729  | 0.706  | 1.00 | 0.00 |
| ATOM | 1182 | H   | TRP | 76 | 8.510 | 7.607  | 0.441  | 1.00 | 0.00 |
| ATOM | 1183 | CA  | TRP | 76 | 7.078 | 7.092  | 1.917  | 1.00 | 0.00 |
| ATOM | 1184 | HA  | TRP | 76 | 6.253 | 7.659  | 2.347  | 1.00 | 0.00 |
| ATOM | 1185 | CB  | TRP | 76 | 6.589 | 5.683  | 1.600  | 1.00 | 0.00 |
| ATOM | 1186 | HB2 | TRP | 76 | 7.264 | 5.251  | 0.860  | 1.00 | 0.00 |
| ATOM | 1187 | HB3 | TRP | 76 | 6.578 | 5.056  | 2.491  | 1.00 | 0.00 |
| ATOM | 1188 | CG  | TRP | 76 | 5.214 | 5.619  | 1.014  | 1.00 | 0.00 |
| ATOM | 1189 | CD1 | TRP | 76 | 4.834 | 5.063  | -0.153 | 1.00 | 0.00 |

|      |      |         |    |        |        |        |      |      |
|------|------|---------|----|--------|--------|--------|------|------|
| ATOM | 1190 | HD1 TRP | 76 | 5.609  | 4.588  | -0.755 | 1.00 | 0.00 |
| ATOM | 1191 | NE1 TRP | 76 | 3.478  | 5.232  | -0.330 | 1.00 | 0.00 |
| ATOM | 1192 | HE1 TRP | 76 | 2.979  | 4.869  | -1.130 | 1.00 | 0.00 |
| ATOM | 1193 | CE2 TRP | 76 | 2.920  | 5.927  | 0.704  | 1.00 | 0.00 |
| ATOM | 1194 | CZ2 TRP | 76 | 1.625  | 6.338  | 0.983  | 1.00 | 0.00 |
| ATOM | 1195 | HZ2 TRP | 76 | 0.839  | 6.108  | 0.264  | 1.00 | 0.00 |
| ATOM | 1196 | CH2 TRP | 76 | 1.413  | 7.027  | 2.178  | 1.00 | 0.00 |
| ATOM | 1197 | HH2 TRP | 76 | 0.403  | 7.353  | 2.425  | 1.00 | 0.00 |
| ATOM | 1198 | CZ3 TRP | 76 | 2.450  | 7.312  | 3.063  | 1.00 | 0.00 |
| ATOM | 1199 | HZ3 TRP | 76 | 2.287  | 7.866  | 3.987  | 1.00 | 0.00 |
| ATOM | 1200 | CE3 TRP | 76 | 3.743  | 6.886  | 2.776  | 1.00 | 0.00 |
| ATOM | 1201 | HE3 TRP | 76 | 4.508  | 7.091  | 3.524  | 1.00 | 0.00 |
| ATOM | 1202 | CD2 TRP | 76 | 4.007  | 6.191  | 1.578  | 1.00 | 0.00 |
| ATOM | 1203 | C TRP   | 76 | 8.182  | 7.117  | 2.951  | 1.00 | 0.00 |
| ATOM | 1204 | O TRP   | 76 | 8.953  | 6.169  | 3.083  | 1.00 | 0.00 |
| ATOM | 1205 | N ILE   | 77 | 8.305  | 8.236  | 3.668  | 1.00 | 0.00 |
| ATOM | 1206 | H ILE   | 77 | 7.650  | 8.987  | 3.503  | 1.00 | 0.00 |
| ATOM | 1207 | CA ILE  | 77 | 9.407  | 8.469  | 4.602  | 1.00 | 0.00 |
| ATOM | 1208 | HA ILE  | 77 | 10.007 | 7.571  | 4.746  | 1.00 | 0.00 |
| ATOM | 1209 | CB ILE  | 77 | 10.322 | 9.635  | 4.188  | 1.00 | 0.00 |
| ATOM | 1210 | HB ILE  | 77 | 9.902  | 10.573 | 4.553  | 1.00 | 0.00 |
| ATOM | 1211 | CG2 ILE | 77 | 11.724 | 9.432  | 4.790  | 1.00 | 0.00 |

|      |      |      |     |    |        |        |        |      |      |
|------|------|------|-----|----|--------|--------|--------|------|------|
| ATOM | 1212 | HG21 | ILE | 77 | 12.145 | 8.496  | 4.424  | 1.00 | 0.00 |
| ATOM | 1213 | HG22 | ILE | 77 | 12.370 | 10.260 | 4.495  | 1.00 | 0.00 |
| ATOM | 1214 | HG23 | ILE | 77 | 11.652 | 9.398  | 5.877  | 1.00 | 0.00 |
| ATOM | 1215 | CG1  | ILE | 77 | 10.374 | 9.828  | 2.671  | 1.00 | 0.00 |
| ATOM | 1216 | HG12 | ILE | 77 | 9.388  | 10.153 | 2.339  | 1.00 | 0.00 |
| ATOM | 1217 | HG13 | ILE | 77 | 11.104 | 10.608 | 2.455  | 1.00 | 0.00 |
| ATOM | 1218 | CD1  | ILE | 77 | 10.764 | 8.547  | 1.932  | 1.00 | 0.00 |
| ATOM | 1219 | HD11 | ILE | 77 | 10.034 | 7.767  | 2.146  | 1.00 | 0.00 |
| ATOM | 1220 | HD12 | ILE | 77 | 10.786 | 8.739  | 0.859  | 1.00 | 0.00 |
| ATOM | 1221 | HD13 | ILE | 77 | 11.750 | 8.222  | 2.263  | 1.00 | 0.00 |
| ATOM | 1222 | C    | ILE | 77 | 8.818  | 8.661  | 5.969  | 1.00 | 0.00 |
| ATOM | 1223 | O    | ILE | 77 | 7.879  | 7.989  | 6.333  | 1.00 | 0.00 |
| ATOM | 1224 | N    | ARG | 78 | 9.315  | 9.573  | 6.774  | 1.00 | 0.00 |
| ATOM | 1225 | H    | ARG | 78 | 10.097 | 10.119 | 6.442  | 1.00 | 0.00 |
| ATOM | 1226 | CA   | ARG | 78 | 8.788  | 9.861  | 8.079  | 1.00 | 0.00 |
| ATOM | 1227 | HA   | ARG | 78 | 9.010  | 9.033  | 8.751  | 1.00 | 0.00 |
| ATOM | 1228 | CB   | ARG | 78 | 9.400  | 11.127 | 8.651  | 1.00 | 0.00 |
| ATOM | 1229 | HB2  | ARG | 78 | 9.660  | 11.799 | 7.832  | 1.00 | 0.00 |
| ATOM | 1230 | HB3  | ARG | 78 | 8.672  | 11.613 | 9.301  | 1.00 | 0.00 |
| ATOM | 1231 | CG   | ARG | 78 | 10.656 | 10.793 | 9.453  | 1.00 | 0.00 |
| ATOM | 1232 | HG2  | ARG | 78 | 10.645 | 11.364 | 10.381 | 1.00 | 0.00 |
| ATOM | 1233 | HG3  | ARG | 78 | 10.656 | 9.728  | 9.681  | 1.00 | 0.00 |

|      |      |      |     |    |        |        |        |      |      |
|------|------|------|-----|----|--------|--------|--------|------|------|
| ATOM | 1234 | CD   | ARG | 78 | 11.913 | 11.143 | 8.656  | 1.00 | 0.00 |
| ATOM | 1235 | HD2  | ARG | 78 | 11.831 | 10.734 | 7.649  | 1.00 | 0.00 |
| ATOM | 1236 | HD3  | ARG | 78 | 12.018 | 12.227 | 8.599  | 1.00 | 0.00 |
| ATOM | 1237 | NE   | ARG | 78 | 13.114 | 10.586 | 9.294  | 1.00 | 0.00 |
| ATOM | 1238 | HE   | ARG | 78 | 12.964 | 10.071 | 10.149 | 1.00 | 0.00 |
| ATOM | 1239 | CZ   | ARG | 78 | 14.350 | 10.738 | 8.859  | 1.00 | 0.00 |
| ATOM | 1240 | NH1  | ARG | 78 | 14.594 | 11.402 | 7.759  | 1.00 | 0.00 |
| ATOM | 1241 | HH11 | ARG | 78 | 13.830 | 11.804 | 7.235  | 1.00 | 0.00 |
| ATOM | 1242 | HH12 | ARG | 78 | 15.546 | 11.510 | 7.438  | 1.00 | 0.00 |
| ATOM | 1243 | NH2  | ARG | 78 | 15.350 | 10.193 | 9.502  | 1.00 | 0.00 |
| ATOM | 1244 | HH21 | ARG | 78 | 15.175 | 9.653  | 10.336 | 1.00 | 0.00 |
| ATOM | 1245 | HH22 | ARG | 78 | 16.293 | 10.316 | 9.160  | 1.00 | 0.00 |
| ATOM | 1246 | C    | ARG | 78 | 7.309  | 10.101 | 8.061  | 1.00 | 0.00 |
| ATOM | 1247 | O    | ARG | 78 | 6.706  | 9.682  | 9.021  | 1.00 | 0.00 |
| ATOM | 1248 | N    | MET | 79 | 6.756  | 10.637 | 6.977  | 1.00 | 0.00 |
| ATOM | 1249 | H    | MET | 79 | 7.385  | 10.945 | 6.249  | 1.00 | 0.00 |
| ATOM | 1250 | CA   | MET | 79 | 5.334  | 10.789 | 6.763  | 1.00 | 0.00 |
| ATOM | 1251 | HA   | MET | 79 | 4.951  | 11.577 | 7.411  | 1.00 | 0.00 |
| ATOM | 1252 | CB   | MET | 79 | 5.033  | 11.160 | 5.315  | 1.00 | 0.00 |
| ATOM | 1253 | HB2  | MET | 79 | 3.961  | 11.053 | 5.149  | 1.00 | 0.00 |
| ATOM | 1254 | HB3  | MET | 79 | 5.322  | 12.200 | 5.160  | 1.00 | 0.00 |
| ATOM | 1255 | CG   | MET | 79 | 5.794  | 10.266 | 4.328  | 1.00 | 0.00 |

|      |      |         |    |       |        |       |      |      |
|------|------|---------|----|-------|--------|-------|------|------|
| ATOM | 1256 | HG2 MET | 79 | 6.516 | 9.696  | 4.912 | 1.00 | 0.00 |
| ATOM | 1257 | HG3 MET | 79 | 5.063 | 9.586  | 3.891 | 1.00 | 0.00 |
| ATOM | 1258 | SD MET  | 79 | 6.646 | 11.126 | 3.023 | 1.00 | 0.00 |
| ATOM | 1259 | CE MET  | 79 | 5.561 | 10.719 | 1.663 | 1.00 | 0.00 |
| ATOM | 1260 | HE1 MET | 79 | 4.560 | 11.096 | 1.871 | 1.00 | 0.00 |
| ATOM | 1261 | HE2 MET | 79 | 5.938 | 11.177 | 0.747 | 1.00 | 0.00 |
| ATOM | 1262 | HE3 MET | 79 | 5.523 | 9.637  | 1.539 | 1.00 | 0.00 |
| ATOM | 1263 | C MET   | 79 | 4.592 | 9.509  | 7.047 | 1.00 | 0.00 |
| ATOM | 1264 | O MET   | 79 | 3.476 | 9.563  | 7.483 | 1.00 | 0.00 |
| ATOM | 1265 | N ARG   | 80 | 5.207 | 8.341  | 6.929 | 1.00 | 0.00 |
| ATOM | 1266 | H ARG   | 80 | 6.103 | 8.342  | 6.462 | 1.00 | 0.00 |
| ATOM | 1267 | CA ARG  | 80 | 4.658 | 7.094  | 7.331 | 1.00 | 0.00 |
| ATOM | 1268 | HA ARG  | 80 | 3.729 | 6.932  | 6.784 | 1.00 | 0.00 |
| ATOM | 1269 | CB ARG  | 80 | 5.580 | 5.933  | 7.067 | 1.00 | 0.00 |
| ATOM | 1270 | HB2 ARG | 80 | 6.498 | 6.077  | 7.637 | 1.00 | 0.00 |
| ATOM | 1271 | HB3 ARG | 80 | 5.091 | 5.015  | 7.392 | 1.00 | 0.00 |
| ATOM | 1272 | CG ARG  | 80 | 5.915 | 5.832  | 5.583 | 1.00 | 0.00 |
| ATOM | 1273 | HG2 ARG | 80 | 5.085 | 5.363  | 5.055 | 1.00 | 0.00 |
| ATOM | 1274 | HG3 ARG | 80 | 6.083 | 6.831  | 5.180 | 1.00 | 0.00 |
| ATOM | 1275 | CD ARG  | 80 | 7.174 | 4.992  | 5.398 | 1.00 | 0.00 |
| ATOM | 1276 | HD2 ARG | 80 | 6.905 | 3.952  | 5.576 | 1.00 | 0.00 |
| ATOM | 1277 | HD3 ARG | 80 | 7.500 | 5.111  | 4.364 | 1.00 | 0.00 |

|      |      |      |     |    |        |        |        |      |      |
|------|------|------|-----|----|--------|--------|--------|------|------|
| ATOM | 1278 | NE   | ARG | 80 | 8.283  | 5.347  | 6.282  | 1.00 | 0.00 |
| ATOM | 1279 | HE   | ARG | 80 | 8.227  | 6.295  | 6.626  | 1.00 | 0.00 |
| ATOM | 1280 | CZ   | ARG | 80 | 9.294  | 4.611  | 6.649  | 1.00 | 0.00 |
| ATOM | 1281 | NH1  | ARG | 80 | 9.409  | 3.400  | 6.195  | 1.00 | 0.00 |
| ATOM | 1282 | HH11 | ARG | 80 | 8.715  | 3.035  | 5.559  | 1.00 | 0.00 |
| ATOM | 1283 | HH12 | ARG | 80 | 10.193 | 2.830  | 6.479  | 1.00 | 0.00 |
| ATOM | 1284 | NH2  | ARG | 80 | 10.184 | 5.089  | 7.482  | 1.00 | 0.00 |
| ATOM | 1285 | HH21 | ARG | 80 | 10.084 | 6.029  | 7.838  | 1.00 | 0.00 |
| ATOM | 1286 | HH22 | ARG | 80 | 10.966 | 4.516  | 7.764  | 1.00 | 0.00 |
| ATOM | 1287 | C    | ARG | 80 | 4.263  | 7.118  | 8.769  | 1.00 | 0.00 |
| ATOM | 1288 | O    | ARG | 80 | 3.545  | 6.232  | 9.085  | 1.00 | 0.00 |
| ATOM | 1289 | N    | ASP | 81 | 4.601  | 8.067  | 9.609  | 1.00 | 0.00 |
| ATOM | 1290 | H    | ASP | 81 | 5.141  | 8.810  | 9.188  | 1.00 | 0.00 |
| ATOM | 1291 | CA   | ASP | 81 | 4.271  | 8.170  | 11.016 | 1.00 | 0.00 |
| ATOM | 1292 | HA   | ASP | 81 | 5.007  | 7.640  | 11.620 | 1.00 | 0.00 |
| ATOM | 1293 | CB   | ASP | 81 | 4.274  | 9.640  | 11.423 | 1.00 | 0.00 |
| ATOM | 1294 | HB2  | ASP | 81 | 5.072  | 10.130 | 10.863 | 1.00 | 0.00 |
| ATOM | 1295 | HB3  | ASP | 81 | 3.316  | 10.084 | 11.152 | 1.00 | 0.00 |
| ATOM | 1296 | CG   | ASP | 81 | 4.515  | 9.824  | 12.918 | 1.00 | 0.00 |
| ATOM | 1297 | OD1  | ASP | 81 | 4.771  | 8.820  | 13.616 | 1.00 | 0.00 |
| ATOM | 1298 | OD2  | ASP | 81 | 4.418  | 10.987 | 13.350 | 1.00 | 0.00 |
| ATOM | 1299 | C    | ASP | 81 | 2.876  | 7.612  | 11.297 | 1.00 | 0.00 |

|      |      |      |     |    |        |        |        |      |      |
|------|------|------|-----|----|--------|--------|--------|------|------|
| ATOM | 1300 | O    | ASP | 81 | 2.700  | 6.642  | 12.028 | 1.00 | 0.00 |
| ATOM | 1301 | N    | GLN | 82 | 1.897  | 8.098  | 10.523 | 1.00 | 0.00 |
| ATOM | 1302 | H    | GLN | 82 | 2.102  | 8.844  | 9.873  | 1.00 | 0.00 |
| ATOM | 1303 | CA   | GLN | 82 | 0.541  | 7.645  | 10.633 | 1.00 | 0.00 |
| ATOM | 1304 | HA   | GLN | 82 | 0.326  | 7.444  | 11.682 | 1.00 | 0.00 |
| ATOM | 1305 | CB   | GLN | 82 | -0.459 | 8.656  | 10.120 | 1.00 | 0.00 |
| ATOM | 1306 | HB2  | GLN | 82 | 0.056  | 9.360  | 9.466  | 1.00 | 0.00 |
| ATOM | 1307 | HB3  | GLN | 82 | -1.230 | 8.133  | 9.554  | 1.00 | 0.00 |
| ATOM | 1308 | CG   | GLN | 82 | -1.100 | 9.411  | 11.271 | 1.00 | 0.00 |
| ATOM | 1309 | HG2  | GLN | 82 | -2.006 | 9.886  | 10.894 | 1.00 | 0.00 |
| ATOM | 1310 | HG3  | GLN | 82 | -1.359 | 8.718  | 12.071 | 1.00 | 0.00 |
| ATOM | 1311 | CD   | GLN | 82 | -0.188 | 10.486 | 11.836 | 1.00 | 0.00 |
| ATOM | 1312 | OE1  | GLN | 82 | -0.429 | 11.669 | 11.699 | 1.00 | 0.00 |
| ATOM | 1313 | NE2  | GLN | 82 | 0.894  | 10.086 | 12.461 | 1.00 | 0.00 |
| ATOM | 1314 | HE21 | GLN | 82 | 1.529  | 10.768 | 12.852 | 1.00 | 0.00 |
| ATOM | 1315 | HE22 | GLN | 82 | 1.088  | 9.099  | 12.547 | 1.00 | 0.00 |
| ATOM | 1316 | C    | GLN | 82 | 0.335  | 6.361  | 9.931  | 1.00 | 0.00 |
| ATOM | 1317 | O    | GLN | 82 | 0.246  | 5.384  | 10.655 | 1.00 | 0.00 |
| ATOM | 1318 | N    | VAL | 83 | 0.151  | 6.379  | 8.604  | 1.00 | 0.00 |
| ATOM | 1319 | H    | VAL | 83 | 0.004  | 7.296  | 8.206  | 1.00 | 0.00 |
| ATOM | 1320 | CA   | VAL | 83 | 0.078  | 5.232  | 7.727  | 1.00 | 0.00 |
| ATOM | 1321 | HA   | VAL | 83 | -0.935 | 4.842  | 7.633  | 1.00 | 0.00 |

|      |      |      |     |    |        |       |        |      |      |
|------|------|------|-----|----|--------|-------|--------|------|------|
| ATOM | 1322 | CB   | VAL | 83 | 0.623  | 5.506 | 6.336  | 1.00 | 0.00 |
| ATOM | 1323 | HB   | VAL | 83 | -0.226 | 5.607 | 5.660  | 1.00 | 0.00 |
| ATOM | 1324 | CG1  | VAL | 83 | 1.461  | 6.744 | 6.271  | 1.00 | 0.00 |
| ATOM | 1325 | HG11 | VAL | 83 | 2.311  | 6.644 | 6.945  | 1.00 | 0.00 |
| ATOM | 1326 | HG12 | VAL | 83 | 1.822  | 6.887 | 5.252  | 1.00 | 0.00 |
| ATOM | 1327 | HG13 | VAL | 83 | 0.862  | 7.605 | 6.567  | 1.00 | 0.00 |
| ATOM | 1328 | CG2  | VAL | 83 | 1.387  | 4.343 | 5.773  | 1.00 | 0.00 |
| ATOM | 1329 | HG21 | VAL | 83 | 0.732  | 3.474 | 5.709  | 1.00 | 0.00 |
| ATOM | 1330 | HG22 | VAL | 83 | 1.753  | 4.596 | 4.777  | 1.00 | 0.00 |
| ATOM | 1331 | HG23 | VAL | 83 | 2.232  | 4.114 | 6.422  | 1.00 | 0.00 |
| ATOM | 1332 | C    | VAL | 83 | 0.799  | 4.042 | 8.316  | 1.00 | 0.00 |
| ATOM | 1333 | O    | VAL | 83 | 0.216  | 3.002 | 8.394  | 1.00 | 0.00 |
| ATOM | 1334 | N    | MET | 84 | 2.029  | 4.130 | 8.763  | 1.00 | 0.00 |
| ATOM | 1335 | H    | MET | 84 | 2.490  | 5.005 | 8.556  | 1.00 | 0.00 |
| ATOM | 1336 | CA   | MET | 84 | 2.768  | 3.120 | 9.478  | 1.00 | 0.00 |
| ATOM | 1337 | HA   | MET | 84 | 3.196  | 2.406 | 8.775  | 1.00 | 0.00 |
| ATOM | 1338 | CB   | MET | 84 | 3.895  | 3.757 | 10.269 | 1.00 | 0.00 |
| ATOM | 1339 | HB2  | MET | 84 | 4.594  | 4.211 | 9.566  | 1.00 | 0.00 |
| ATOM | 1340 | HB3  | MET | 84 | 3.471  | 4.531 | 10.908 | 1.00 | 0.00 |
| ATOM | 1341 | CG   | MET | 84 | 4.626  | 2.740 | 11.124 | 1.00 | 0.00 |
| ATOM | 1342 | HG2  | MET | 84 | 3.905  | 2.286 | 11.802 | 1.00 | 0.00 |
| ATOM | 1343 | HG3  | MET | 84 | 5.037  | 1.975 | 10.465 | 1.00 | 0.00 |



|      |      |     |     |    |        |       |        |      |      |
|------|------|-----|-----|----|--------|-------|--------|------|------|
| ATOM | 1344 | SD  | MET | 84 | 5.964  | 3.476 | 12.086 | 1.00 | 0.00 |
| ATOM | 1345 | CE  | MET | 84 | 5.066  | 4.907 | 12.768 | 1.00 | 0.00 |
| ATOM | 1346 | HE1 | MET | 84 | 4.222  | 4.558 | 13.362 | 1.00 | 0.00 |
| ATOM | 1347 | HE2 | MET | 84 | 5.737  | 5.491 | 13.398 | 1.00 | 0.00 |
| ATOM | 1348 | HE3 | MET | 84 | 4.701  | 5.531 | 11.951 | 1.00 | 0.00 |
| ATOM | 1349 | C   | MET | 84 | 1.895  | 2.328 | 10.438 | 1.00 | 0.00 |
| ATOM | 1350 | O   | MET | 84 | 1.703  | 1.129 | 10.239 | 1.00 | 0.00 |
| ATOM | 1351 | N   | SER | 85 | 1.331  | 2.994 | 11.447 | 1.00 | 0.00 |
| ATOM | 1352 | H   | SER | 85 | 1.625  | 3.946 | 11.614 | 1.00 | 0.00 |
| ATOM | 1353 | CA  | SER | 85 | 0.380  | 2.397 | 12.363 | 1.00 | 0.00 |
| ATOM | 1354 | HA  | SER | 85 | 0.643  | 1.356 | 12.548 | 1.00 | 0.00 |
| ATOM | 1355 | CB  | SER | 85 | 0.394  | 3.144 | 13.686 | 1.00 | 0.00 |
| ATOM | 1356 | HB2 | SER | 85 | 1.420  | 3.370 | 13.976 | 1.00 | 0.00 |
| ATOM | 1357 | HB3 | SER | 85 | -0.170 | 4.073 | 13.596 | 1.00 | 0.00 |
| ATOM | 1358 | OG  | SER | 85 | -0.205 | 2.320 | 14.672 | 1.00 | 0.00 |
| ATOM | 1359 | HG  | SER | 85 | -0.204 | 2.779 | 15.515 | 1.00 | 0.00 |
| ATOM | 1360 | C   | SER | 85 | -1.040 | 2.347 | 11.783 | 1.00 | 0.00 |
| ATOM | 1361 | O   | SER | 85 | -2.030 | 2.452 | 12.494 | 1.00 | 0.00 |
| ATOM | 1362 | N   | MET | 86 | -1.169 | 2.043 | 10.500 | 1.00 | 0.00 |
| ATOM | 1363 | H   | MET | 86 | -0.324 | 1.872 | 9.974  | 1.00 | 0.00 |
| ATOM | 1364 | CA  | MET | 86 | -2.433 | 1.957 | 9.810  | 1.00 | 0.00 |
| ATOM | 1365 | HA  | MET | 86 | -3.217 | 1.619 | 10.487 | 1.00 | 0.00 |

|      |      |     |     |    |        |        |        |      |      |
|------|------|-----|-----|----|--------|--------|--------|------|------|
| ATOM | 1366 | CB  | MET | 86 | -2.803 | 3.327  | 9.289  | 1.00 | 0.00 |
| ATOM | 1367 | HB2 | MET | 86 | -1.883 | 3.833  | 8.994  | 1.00 | 0.00 |
| ATOM | 1368 | HB3 | MET | 86 | -3.439 | 3.192  | 8.414  | 1.00 | 0.00 |
| ATOM | 1369 | CG  | MET | 86 | -3.532 | 4.166  | 10.318 | 1.00 | 0.00 |
| ATOM | 1370 | HG2 | MET | 86 | -2.903 | 4.290  | 11.199 | 1.00 | 0.00 |
| ATOM | 1371 | HG3 | MET | 86 | -3.761 | 5.145  | 9.895  | 1.00 | 0.00 |
| ATOM | 1372 | SD  | MET | 86 | -5.073 | 3.350  | 10.797 | 1.00 | 0.00 |
| ATOM | 1373 | CE  | MET | 86 | -5.511 | 4.388  | 12.202 | 1.00 | 0.00 |
| ATOM | 1374 | HE1 | MET | 86 | -5.630 | 5.420  | 11.869 | 1.00 | 0.00 |
| ATOM | 1375 | HE2 | MET | 86 | -6.447 | 4.037  | 12.636 | 1.00 | 0.00 |
| ATOM | 1376 | HE3 | MET | 86 | -4.721 | 4.338  | 12.951 | 1.00 | 0.00 |
| ATOM | 1377 | C   | MET | 86 | -2.394 | 0.988  | 8.646  | 1.00 | 0.00 |
| ATOM | 1378 | O   | MET | 86 | -3.208 | 0.088  | 8.578  | 1.00 | 0.00 |
| ATOM | 1379 | N   | ALA | 87 | -1.375 | 1.025  | 7.812  | 1.00 | 0.00 |
| ATOM | 1380 | H   | ALA | 87 | -0.741 | 1.799  | 7.948  | 1.00 | 0.00 |
| ATOM | 1381 | CA  | ALA | 87 | -1.123 | 0.127  | 6.733  | 1.00 | 0.00 |
| ATOM | 1382 | HA  | ALA | 87 | -2.049 | -0.133 | 6.220  | 1.00 | 0.00 |
| ATOM | 1383 | CB  | ALA | 87 | -0.179 | 0.784  | 5.730  | 1.00 | 0.00 |
| ATOM | 1384 | HB1 | ALA | 87 | 0.757  | 1.043  | 6.226  | 1.00 | 0.00 |
| ATOM | 1385 | HB2 | ALA | 87 | 0.023  | 0.092  | 4.912  | 1.00 | 0.00 |
| ATOM | 1386 | HB3 | ALA | 87 | -0.641 | 1.688  | 5.333  | 1.00 | 0.00 |
| ATOM | 1387 | C   | ALA | 87 | -0.547 | -1.163 | 7.281  | 1.00 | 0.00 |

|      |      |     |     |    |        |        |        |      |      |
|------|------|-----|-----|----|--------|--------|--------|------|------|
| ATOM | 1388 | O   | ALA | 87 | -0.148 | -2.005 | 6.512  | 1.00 | 0.00 |
| ATOM | 1389 | N   | HIE | 88 | -0.424 | -1.328 | 8.590  | 1.00 | 0.00 |
| ATOM | 1390 | H   | HIE | 88 | -0.605 | -0.536 | 9.190  | 1.00 | 0.00 |
| ATOM | 1391 | CA  | HIE | 88 | 0.023  | -2.552 | 9.194  | 1.00 | 0.00 |
| ATOM | 1392 | HA  | HIE | 88 | 0.552  | -3.171 | 8.469  | 1.00 | 0.00 |
| ATOM | 1393 | CB  | HIE | 88 | 0.978  | -2.207 | 10.328 | 1.00 | 0.00 |
| ATOM | 1394 | HB2 | HIE | 88 | 1.601  | -3.071 | 10.556 | 1.00 | 0.00 |
| ATOM | 1395 | HB3 | HIE | 88 | 1.610  | -1.379 | 10.006 | 1.00 | 0.00 |
| ATOM | 1396 | CG  | HIE | 88 | 0.336  | -1.782 | 11.628 | 1.00 | 0.00 |
| ATOM | 1397 | ND1 | HIE | 88 | 0.610  | -2.337 | 12.859 | 1.00 | 0.00 |
| ATOM | 1398 | CE1 | HIE | 88 | -0.123 | -1.676 | 13.784 | 1.00 | 0.00 |
| ATOM | 1399 | HE1 | HIE | 88 | -0.028 | -1.940 | 14.837 | 1.00 | 0.00 |
| ATOM | 1400 | NE2 | HIE | 88 | -0.890 | -0.742 | 13.166 | 1.00 | 0.00 |
| ATOM | 1401 | HE2 | HIE | 88 | -1.548 | -0.103 | 13.588 | 1.00 | 0.00 |
| ATOM | 1402 | CD2 | HIE | 88 | -0.611 | -0.813 | 11.815 | 1.00 | 0.00 |
| ATOM | 1403 | HD2 | HIE | 88 | -1.126 | -0.153 | 11.116 | 1.00 | 0.00 |
| ATOM | 1404 | C   | HIE | 88 | -1.164 | -3.358 | 9.659  | 1.00 | 0.00 |
| ATOM | 1405 | O   | HIE | 88 | -1.027 | -4.542 | 9.829  | 1.00 | 0.00 |
| ATOM | 1406 | N   | ASN | 89 | -2.295 | -2.718 | 9.936  | 1.00 | 0.00 |
| ATOM | 1407 | H   | ASN | 89 | -2.304 | -1.711 | 9.850  | 1.00 | 0.00 |
| ATOM | 1408 | CA  | ASN | 89 | -3.515 | -3.383 | 10.328 | 1.00 | 0.00 |
| ATOM | 1409 | HA  | ASN | 89 | -3.304 | -4.413 | 10.613 | 1.00 | 0.00 |

|      |      |      |     |    |        |        |        |      |      |
|------|------|------|-----|----|--------|--------|--------|------|------|
| ATOM | 1410 | CB   | ASN | 89 | -4.138 | -2.666 | 11.518 | 1.00 | 0.00 |
| ATOM | 1411 | HB2  | ASN | 89 | -3.903 | -1.602 | 11.471 | 1.00 | 0.00 |
| ATOM | 1412 | HB3  | ASN | 89 | -5.220 | -2.799 | 11.510 | 1.00 | 0.00 |
| ATOM | 1413 | CG   | ASN | 89 | -3.593 | -3.223 | 12.807 | 1.00 | 0.00 |
| ATOM | 1414 | OD1  | ASN | 89 | -4.272 | -3.588 | 13.732 | 1.00 | 0.00 |
| ATOM | 1415 | ND2  | ASN | 89 | -2.291 | -3.297 | 12.894 | 1.00 | 0.00 |
| ATOM | 1416 | HD21 | ASN | 89 | -1.864 | -3.661 | 13.733 | 1.00 | 0.00 |
| ATOM | 1417 | HD22 | ASN | 89 | -1.718 | -2.989 | 12.121 | 1.00 | 0.00 |
| ATOM | 1418 | C    | ASN | 89 | -4.517 | -3.358 | 9.201  | 1.00 | 0.00 |
| ATOM | 1419 | O    | ASN | 89 | -5.375 | -4.197 | 9.181  | 1.00 | 0.00 |
| ATOM | 1420 | N    | LEU | 90 | -4.413 | -2.429 | 8.260  | 1.00 | 0.00 |
| ATOM | 1421 | H    | LEU | 90 | -3.745 | -1.684 | 8.401  | 1.00 | 0.00 |
| ATOM | 1422 | CA   | LEU | 90 | -5.257 | -2.380 | 7.083  | 1.00 | 0.00 |
| ATOM | 1423 | HA   | LEU | 90 | -6.306 | -2.324 | 7.372  | 1.00 | 0.00 |
| ATOM | 1424 | CB   | LEU | 90 | -4.911 | -1.136 | 6.254  | 1.00 | 0.00 |
| ATOM | 1425 | HB2  | LEU | 90 | -3.842 | -0.974 | 6.393  | 1.00 | 0.00 |
| ATOM | 1426 | HB3  | LEU | 90 | -5.112 | -1.346 | 5.203  | 1.00 | 0.00 |
| ATOM | 1427 | CG   | LEU | 90 | -5.674 | 0.118  | 6.677  | 1.00 | 0.00 |
| ATOM | 1428 | HG   | LEU | 90 | -5.697 | 0.175  | 7.765  | 1.00 | 0.00 |
| ATOM | 1429 | CD1  | LEU | 90 | -4.983 | 1.366  | 6.115  | 1.00 | 0.00 |
| ATOM | 1430 | HD11 | LEU | 90 | -4.960 | 1.311  | 5.026  | 1.00 | 0.00 |
| ATOM | 1431 | HD12 | LEU | 90 | -5.533 | 2.256  | 6.421  | 1.00 | 0.00 |

|      |      |      |     |    |        |        |       |      |      |
|------|------|------|-----|----|--------|--------|-------|------|------|
| ATOM | 1432 | HD13 | LEU | 90 | -3.963 | 1.421  | 6.497 | 1.00 | 0.00 |
| ATOM | 1433 | CD2  | LEU | 90 | -7.117 | 0.038  | 6.187 | 1.00 | 0.00 |
| ATOM | 1434 | HD21 | LEU | 90 | -7.600 | -0.838 | 6.618 | 1.00 | 0.00 |
| ATOM | 1435 | HD22 | LEU | 90 | -7.655 | 0.936  | 6.492 | 1.00 | 0.00 |
| ATOM | 1436 | HD23 | LEU | 90 | -7.128 | -0.039 | 5.099 | 1.00 | 0.00 |
| ATOM | 1437 | C    | LEU | 90 | -5.129 | -3.661 | 6.256 | 1.00 | 0.00 |
| ATOM | 1438 | O    | LEU | 90 | -6.132 | -4.279 | 5.922 | 1.00 | 0.00 |
| ATOM | 1439 | N    | PRO | 91 | -3.895 | -4.084 | 5.929 | 1.00 | 0.00 |
| ATOM | 1440 | CD   | PRO | 91 | -2.635 | -3.470 | 6.271 | 1.00 | 0.00 |
| ATOM | 1441 | HD2  | PRO | 91 | -2.524 | -3.548 | 7.352 | 1.00 | 0.00 |
| ATOM | 1442 | HD3  | PRO | 91 | -2.704 | -2.419 | 5.989 | 1.00 | 0.00 |
| ATOM | 1443 | CG   | PRO | 91 | -1.546 | -4.194 | 5.524 | 1.00 | 0.00 |
| ATOM | 1444 | HG2  | PRO | 91 | -0.869 | -4.664 | 6.237 | 1.00 | 0.00 |
| ATOM | 1445 | HG3  | PRO | 91 | -0.991 | -3.481 | 4.912 | 1.00 | 0.00 |
| ATOM | 1446 | CB   | PRO | 91 | -2.234 | -5.216 | 4.665 | 1.00 | 0.00 |
| ATOM | 1447 | HB2  | PRO | 91 | -1.735 | -6.173 | 4.812 | 1.00 | 0.00 |
| ATOM | 1448 | HB3  | PRO | 91 | -2.236 | -4.968 | 3.603 | 1.00 | 0.00 |
| ATOM | 1449 | CA   | PRO | 91 | -3.663 | -5.291 | 5.184 | 1.00 | 0.00 |
| ATOM | 1450 | HA   | PRO | 91 | -4.368 | -5.341 | 4.354 | 1.00 | 0.00 |
| ATOM | 1451 | C    | PRO | 91 | -3.850 | -6.494 | 6.076 | 1.00 | 0.00 |
| ATOM | 1452 | O    | PRO | 91 | -4.364 | -7.492 | 5.630 | 1.00 | 0.00 |
| ATOM | 1453 | N    | ILE | 92 | -3.474 | -6.447 | 7.334 | 1.00 | 0.00 |

|      |      |      |     |    |        |        |        |      |      |
|------|------|------|-----|----|--------|--------|--------|------|------|
| ATOM | 1454 | H    | ILE | 92 | -2.987 | -5.632 | 7.679  | 1.00 | 0.00 |
| ATOM | 1455 | CA   | ILE | 92 | -3.681 | -7.557 | 8.238  | 1.00 | 0.00 |
| ATOM | 1456 | HA   | ILE | 92 | -3.322 | -8.516 | 7.864  | 1.00 | 0.00 |
| ATOM | 1457 | CB   | ILE | 92 | -2.993 | -7.238 | 9.559  | 1.00 | 0.00 |
| ATOM | 1458 | HB   | ILE | 92 | -3.026 | -6.160 | 9.717  | 1.00 | 0.00 |
| ATOM | 1459 | CG2  | ILE | 92 | -3.684 | -7.948 | 10.729 | 1.00 | 0.00 |
| ATOM | 1460 | HG21 | ILE | 92 | -3.651 | -9.026 | 10.571 | 1.00 | 0.00 |
| ATOM | 1461 | HG22 | ILE | 92 | -3.171 | -7.701 | 11.658 | 1.00 | 0.00 |
| ATOM | 1462 | HG23 | ILE | 92 | -4.722 | -7.622 | 10.790 | 1.00 | 0.00 |
| ATOM | 1463 | CG1  | ILE | 92 | -1.503 | -7.565 | 9.480  | 1.00 | 0.00 |
| ATOM | 1464 | HG12 | ILE | 92 | -1.377 | -8.307 | 8.692  | 1.00 | 0.00 |
| ATOM | 1465 | HG13 | ILE | 92 | -0.985 | -6.647 | 9.200  | 1.00 | 0.00 |
| ATOM | 1466 | CD1  | ILE | 92 | -0.920 | -8.099 | 10.776 | 1.00 | 0.00 |
| ATOM | 1467 | HD11 | ILE | 92 | -1.436 | -9.016 | 11.056 | 1.00 | 0.00 |
| ATOM | 1468 | HD12 | ILE | 92 | 0.141  | -8.307 | 10.639 | 1.00 | 0.00 |
| ATOM | 1469 | HD13 | ILE | 92 | -1.045 | -7.356 | 11.564 | 1.00 | 0.00 |
| ATOM | 1470 | C    | ILE | 92 | -5.157 | -7.836 | 8.439  | 1.00 | 0.00 |
| ATOM | 1471 | O    | ILE | 92 | -5.543 | -8.994 | 8.383  | 1.00 | 0.00 |
| ATOM | 1472 | N    | GLU | 93 | -5.958 | -6.797 | 8.636  | 1.00 | 0.00 |
| ATOM | 1473 | H    | GLU | 93 | -5.557 | -5.871 | 8.684  | 1.00 | 0.00 |
| ATOM | 1474 | CA   | GLU | 93 | -7.396 | -6.937 | 8.814  | 1.00 | 0.00 |
| ATOM | 1475 | HA   | GLU | 93 | -7.598 | -7.638 | 9.623  | 1.00 | 0.00 |

|      |      |     |     |    |        |         |        |      |      |
|------|------|-----|-----|----|--------|---------|--------|------|------|
| ATOM | 1476 | CB  | GLU | 93 | -8.036 | -5.587  | 9.163  | 1.00 | 0.00 |
| ATOM | 1477 | HB2 | GLU | 93 | -7.511 | -4.800  | 8.620  | 1.00 | 0.00 |
| ATOM | 1478 | HB3 | GLU | 93 | -9.081 | -5.605  | 8.853  | 1.00 | 0.00 |
| ATOM | 1479 | CG  | GLU | 93 | -7.954 | -5.310  | 10.672 | 1.00 | 0.00 |
| ATOM | 1480 | HG2 | GLU | 93 | -7.562 | -6.204  | 11.157 | 1.00 | 0.00 |
| ATOM | 1481 | HG3 | GLU | 93 | -7.282 | -4.472  | 10.857 | 1.00 | 0.00 |
| ATOM | 1482 | CD  | GLU | 93 | -9.338 | -4.988  | 11.238 | 1.00 | 0.00 |
| ATOM | 1483 | OE1 | GLU | 93 | -9.957 | -4.025  | 10.725 | 1.00 | 0.00 |
| ATOM | 1484 | OE2 | GLU | 93 | -9.750 | -5.690  | 12.186 | 1.00 | 0.00 |
| ATOM | 1485 | C   | GLU | 93 | -8.047 | -7.487  | 7.547  | 1.00 | 0.00 |
| ATOM | 1486 | O   | GLU | 93 | -9.146 | -8.026  | 7.595  | 1.00 | 0.00 |
| ATOM | 1487 | N   | CYX | 94 | -7.354 | -7.366  | 6.411  | 1.00 | 0.00 |
| ATOM | 1488 | H   | CYX | 94 | -6.522 | -6.792  | 6.397  | 1.00 | 0.00 |
| ATOM | 1489 | CA  | CYX | 94 | -7.793 | -7.959  | 5.176  | 1.00 | 0.00 |
| ATOM | 1490 | HA  | CYX | 94 | -8.878 | -8.062  | 5.170  | 1.00 | 0.00 |
| ATOM | 1491 | CB  | CYX | 94 | -7.383 | -7.066  | 4.009  | 1.00 | 0.00 |
| ATOM | 1492 | HB2 | CYX | 94 | -6.441 | -6.570  | 4.243  | 1.00 | 0.00 |
| ATOM | 1493 | HB3 | CYX | 94 | -7.260 | -7.673  | 3.112  | 1.00 | 0.00 |
| ATOM | 1494 | SG  | CYX | 94 | -8.645 | -5.816  | 3.612  | 1.00 | 0.00 |
| ATOM | 1495 | C   | CYX | 94 | -7.257 | -9.366  | 5.011  | 1.00 | 0.00 |
| ATOM | 1496 | O   | CYX | 94 | -7.709 | -10.016 | 4.075  | 1.00 | 0.00 |
| ATOM | 1497 | N   | ASN | 95 | -6.295 | -9.791  | 5.845  | 1.00 | 0.00 |

|      |      |      |     |    |        |         |       |      |      |
|------|------|------|-----|----|--------|---------|-------|------|------|
| ATOM | 1498 | H    | ASN | 95 | -5.980 | -9.110  | 6.521 | 1.00 | 0.00 |
| ATOM | 1499 | CA   | ASN | 95 | -5.650 | -11.093 | 5.826 | 1.00 | 0.00 |
| ATOM | 1500 | HA   | ASN | 95 | -5.209 | -11.309 | 6.799 | 1.00 | 0.00 |
| ATOM | 1501 | CB   | ASN | 95 | -6.685 | -12.176 | 5.506 | 1.00 | 0.00 |
| ATOM | 1502 | HB2  | ASN | 95 | -7.630 | -11.865 | 5.950 | 1.00 | 0.00 |
| ATOM | 1503 | HB3  | ASN | 95 | -6.811 | -12.292 | 4.429 | 1.00 | 0.00 |
| ATOM | 1504 | CG   | ASN | 95 | -6.293 | -13.503 | 6.090 | 1.00 | 0.00 |
| ATOM | 1505 | OD1  | ASN | 95 | -7.030 | -14.099 | 6.848 | 1.00 | 0.00 |
| ATOM | 1506 | ND2  | ASN | 95 | -5.106 | -13.970 | 5.786 | 1.00 | 0.00 |
| ATOM | 1507 | HD21 | ASN | 95 | -4.806 | -14.859 | 6.159 | 1.00 | 0.00 |
| ATOM | 1508 | HD22 | ASN | 95 | -4.497 | -13.438 | 5.180 | 1.00 | 0.00 |
| ATOM | 1509 | C    | ASN | 95 | -4.511 | -11.065 | 4.788 | 1.00 | 0.00 |
| ATOM | 1510 | O    | ASN | 95 | -4.152 | -12.043 | 4.156 | 1.00 | 0.00 |
| ATOM | 1511 | N    | LEU | 96 | -3.974 | -9.911  | 4.471 | 1.00 | 0.00 |
| ATOM | 1512 | H    | LEU | 96 | -4.356 | -9.079  | 4.897 | 1.00 | 0.00 |
| ATOM | 1513 | CA   | LEU | 96 | -2.951 | -9.757  | 3.476 | 1.00 | 0.00 |
| ATOM | 1514 | HA   | LEU | 96 | -3.122 | -10.468 | 2.668 | 1.00 | 0.00 |
| ATOM | 1515 | CB   | LEU | 96 | -2.951 | -8.356  | 2.896 | 1.00 | 0.00 |
| ATOM | 1516 | HB2  | LEU | 96 | -2.537 | -7.763  | 3.711 | 1.00 | 0.00 |
| ATOM | 1517 | HB3  | LEU | 96 | -2.293 | -8.289  | 2.029 | 1.00 | 0.00 |
| ATOM | 1518 | CG   | LEU | 96 | -4.335 | -7.820  | 2.528 | 1.00 | 0.00 |
| ATOM | 1519 | HG   | LEU | 96 | -4.984 | -7.889  | 3.400 | 1.00 | 0.00 |



|      |      |      |     |    |        |         |       |      |      |
|------|------|------|-----|----|--------|---------|-------|------|------|
| ATOM | 1520 | CD1  | LEU | 96 | -4.247 | -6.385  | 2.082 | 1.00 | 0.00 |
| ATOM | 1521 | HD11 | LEU | 96 | -3.598 | -6.314  | 1.209 | 1.00 | 0.00 |
| ATOM | 1522 | HD12 | LEU | 96 | -5.242 | -6.022  | 1.824 | 1.00 | 0.00 |
| ATOM | 1523 | HD13 | LEU | 96 | -3.837 | -5.777  | 2.888 | 1.00 | 0.00 |
| ATOM | 1524 | CD2  | LEU | 96 | -5.036 | -8.682  | 1.498 | 1.00 | 0.00 |
| ATOM | 1525 | HD21 | LEU | 96 | -5.161 | -9.690  | 1.891 | 1.00 | 0.00 |
| ATOM | 1526 | HD22 | LEU | 96 | -6.014 | -8.256  | 1.272 | 1.00 | 0.00 |
| ATOM | 1527 | HD23 | LEU | 96 | -4.438 | -8.719  | 0.587 | 1.00 | 0.00 |
| ATOM | 1528 | C    | LEU | 96 | -1.651 | -10.156 | 4.127 | 1.00 | 0.00 |
| ATOM | 1529 | O    | LEU | 96 | -1.098 | -11.172 | 3.758 | 1.00 | 0.00 |
| ATOM | 1530 | N    | MET | 97 | -1.269 | -9.453  | 5.191 | 1.00 | 0.00 |
| ATOM | 1531 | H    | MET | 97 | -1.840 | -8.671  | 5.478 | 1.00 | 0.00 |
| ATOM | 1532 | CA   | MET | 97 | -0.041 | -9.705  | 5.908 | 1.00 | 0.00 |
| ATOM | 1533 | HA   | MET | 97 | 0.470  | -10.572 | 5.491 | 1.00 | 0.00 |
| ATOM | 1534 | CB   | MET | 97 | 0.874  | -8.495  | 5.783 | 1.00 | 0.00 |
| ATOM | 1535 | HB2  | MET | 97 | 1.845  | -8.760  | 6.200 | 1.00 | 0.00 |
| ATOM | 1536 | HB3  | MET | 97 | 0.985  | -8.263  | 4.723 | 1.00 | 0.00 |
| ATOM | 1537 | CG   | MET | 97 | 0.327  | -7.284  | 6.510 | 1.00 | 0.00 |
| ATOM | 1538 | HG2  | MET | 97 | 0.179  | -6.489  | 5.778 | 1.00 | 0.00 |
| ATOM | 1539 | HG3  | MET | 97 | -0.633 | -7.557  | 6.947 | 1.00 | 0.00 |
| ATOM | 1540 | SD   | MET | 97 | 1.430  | -6.691  | 7.819 | 1.00 | 0.00 |
| ATOM | 1541 | CE   | MET | 97 | 2.903  | -6.409  | 6.814 | 1.00 | 0.00 |

|      |      |     |     |    |        |         |        |      |      |
|------|------|-----|-----|----|--------|---------|--------|------|------|
| ATOM | 1542 | HE1 | MET | 97 | 2.680  | -5.675  | 6.039  | 1.00 | 0.00 |
| ATOM | 1543 | HE2 | MET | 97 | 3.709  | -6.035  | 7.446  | 1.00 | 0.00 |
| ATOM | 1544 | HE3 | MET | 97 | 3.211  | -7.345  | 6.348  | 1.00 | 0.00 |
| ATOM | 1545 | C   | MET | 97 | -0.270 | -10.048 | 7.345  | 1.00 | 0.00 |
| ATOM | 1546 | O   | MET | 97 | 0.632  | -9.779  | 8.129  | 1.00 | 0.00 |
| ATOM | 1547 | N   | SER | 98 | -1.471 | -10.554 | 7.666  | 1.00 | 0.00 |
| ATOM | 1548 | H   | SER | 98 | -2.155 | -10.654 | 6.929  | 1.00 | 0.00 |
| ATOM | 1549 | CA  | SER | 98 | -1.868 | -10.892 | 9.030  | 1.00 | 0.00 |
| ATOM | 1550 | HA  | SER | 98 | -2.193 | -9.989  | 9.548  | 1.00 | 0.00 |
| ATOM | 1551 | CB  | SER | 98 | -3.011 | -11.894 | 9.036  | 1.00 | 0.00 |
| ATOM | 1552 | HB2 | SER | 98 | -3.285 | -12.103 | 10.069 | 1.00 | 0.00 |
| ATOM | 1553 | HB3 | SER | 98 | -3.862 | -11.454 | 8.516  | 1.00 | 0.00 |
| ATOM | 1554 | OG  | SER | 98 | -2.637 | -13.101 | 8.393  | 1.00 | 0.00 |
| ATOM | 1555 | HG  | SER | 98 | -3.375 | -13.714 | 8.410  | 1.00 | 0.00 |
| ATOM | 1556 | C   | SER | 98 | -0.706 | -11.431 | 9.881  | 1.00 | 0.00 |
| ATOM | 1557 | O   | SER | 98 | -0.110 | -10.796 | 10.739 | 1.00 | 0.00 |
| ATOM | 1558 | N   | GLN | 99 | -0.250 | -12.617 | 9.566  | 1.00 | 0.00 |
| ATOM | 1559 | H   | GLN | 99 | -0.799 | -13.188 | 8.939  | 1.00 | 0.00 |
| ATOM | 1560 | CA  | GLN | 99 | 0.958  | -13.179 | 10.124 | 1.00 | 0.00 |
| ATOM | 1561 | HA  | GLN | 99 | 1.751  | -12.438 | 10.229 | 1.00 | 0.00 |
| ATOM | 1562 | CB  | GLN | 99 | 0.564  | -13.669 | 11.509 | 1.00 | 0.00 |
| ATOM | 1563 | HB2 | GLN | 99 | -0.440 | -13.317 | 11.746 | 1.00 | 0.00 |

|      |      |      |     |     |        |         |        |      |      |
|------|------|------|-----|-----|--------|---------|--------|------|------|
| ATOM | 1564 | HB3  | GLN | 99  | 0.581  | -14.758 | 11.527 | 1.00 | 0.00 |
| ATOM | 1565 | CG   | GLN | 99  | 1.545  | -13.130 | 12.536 | 1.00 | 0.00 |
| ATOM | 1566 | HG2  | GLN | 99  | 2.392  | -13.813 | 12.590 | 1.00 | 0.00 |
| ATOM | 1567 | HG3  | GLN | 99  | 1.895  | -12.140 | 12.241 | 1.00 | 0.00 |
| ATOM | 1568 | CD   | GLN | 99  | 0.912  | -13.030 | 13.913 | 1.00 | 0.00 |
| ATOM | 1569 | OE1  | GLN | 99  | -0.168 | -13.511 | 14.206 | 1.00 | 0.00 |
| ATOM | 1570 | NE2  | GLN | 99  | 1.588  | -12.355 | 14.815 | 1.00 | 0.00 |
| ATOM | 1571 | HE21 | GLN | 99  | 1.217  | -12.254 | 15.749 | 1.00 | 0.00 |
| ATOM | 1572 | HE22 | GLN | 99  | 2.476  | -11.939 | 14.570 | 1.00 | 0.00 |
| ATOM | 1573 | C    | GLN | 99  | 1.527  | -14.273 | 9.223  | 1.00 | 0.00 |
| ATOM | 1574 | O    | GLN | 99  | 1.713  | -15.419 | 9.630  | 1.00 | 0.00 |
| ATOM | 1575 | N    | PRO | 100 | 1.764  | -13.950 | 7.943  | 1.00 | 0.00 |
| ATOM | 1576 | CD   | PRO | 100 | 1.615  | -12.654 | 7.311  | 1.00 | 0.00 |
| ATOM | 1577 | HD2  | PRO | 100 | 2.358  | -11.988 | 7.750  | 1.00 | 0.00 |
| ATOM | 1578 | HD3  | PRO | 100 | 0.616  | -12.288 | 7.546  | 1.00 | 0.00 |
| ATOM | 1579 | CG   | PRO | 100 | 1.821  | -12.854 | 5.828  | 1.00 | 0.00 |
| ATOM | 1580 | HG2  | PRO | 100 | 2.674  | -12.257 | 5.505  | 1.00 | 0.00 |
| ATOM | 1581 | HG3  | PRO | 100 | 0.927  | -12.523 | 5.298  | 1.00 | 0.00 |
| ATOM | 1582 | CB   | PRO | 100 | 2.065  | -14.332 | 5.607  | 1.00 | 0.00 |
| ATOM | 1583 | HB2  | PRO | 100 | 2.962  | -14.450 | 4.999  | 1.00 | 0.00 |
| ATOM | 1584 | HB3  | PRO | 100 | 1.230  | -14.839 | 5.124  | 1.00 | 0.00 |
| ATOM | 1585 | CA   | PRO | 100 | 2.300  | -14.924 | 7.005  | 1.00 | 0.00 |

|      |      |     |     |     |       |         |        |      |      |
|------|------|-----|-----|-----|-------|---------|--------|------|------|
| ATOM | 1586 | HA  | PRO | 100 | 1.748 | -15.858 | 7.107  | 1.00 | 0.00 |
| ATOM | 1587 | C   | PRO | 100 | 3.782 | -15.175 | 7.286  | 1.00 | 0.00 |
| ATOM | 1588 | O   | PRO | 100 | 4.167 | -16.295 | 7.603  | 1.00 | 0.00 |
| ATOM | 1589 | N   | CYX | 101 | 4.614 | -14.150 | 7.110  | 1.00 | 0.00 |
| ATOM | 1590 | H   | CYX | 101 | 4.262 | -13.276 | 6.745  | 1.00 | 0.00 |
| ATOM | 1591 | CA  | CYX | 101 | 6.029 | -14.267 | 7.353  | 1.00 | 0.00 |
| ATOM | 1592 | HA  | CYX | 101 | 6.407 | -15.195 | 6.924  | 1.00 | 0.00 |
| ATOM | 1593 | CB  | CYX | 101 | 6.767 | -13.095 | 6.708  | 1.00 | 0.00 |
| ATOM | 1594 | HB2 | CYX | 101 | 6.782 | -12.250 | 7.397  | 1.00 | 0.00 |
| ATOM | 1595 | HB3 | CYX | 101 | 7.790 | -13.392 | 6.475  | 1.00 | 0.00 |
| ATOM | 1596 | SG  | CYX | 101 | 6.019 | -12.458 | 5.158  | 1.00 | 0.00 |
| ATOM | 1597 | C   | CYX | 101 | 6.251 | -14.345 | 8.856  | 1.00 | 0.00 |
| ATOM | 1598 | O   | CYX | 101 | 5.783 | -13.474 | 9.594  | 1.00 | 0.00 |
| ATOM | 1599 | N   | GLN | 102 | 6.971 | -15.366 | 9.291  | 1.00 | 0.00 |
| ATOM | 1600 | H   | GLN | 102 | 7.269 | -16.070 | 8.631  | 1.00 | 0.00 |
| ATOM | 1601 | CA  | GLN | 102 | 7.291 | -15.557 | 10.696 | 1.00 | 0.00 |
| ATOM | 1602 | HA  | GLN | 102 | 6.975 | -14.687 | 11.271 | 1.00 | 0.00 |
| ATOM | 1603 | CB  | GLN | 102 | 6.569 | -16.790 | 11.238 | 1.00 | 0.00 |
| ATOM | 1604 | HB2 | GLN | 102 | 6.890 | -17.664 | 10.671 | 1.00 | 0.00 |
| ATOM | 1605 | HB3 | GLN | 102 | 6.834 | -16.921 | 12.287 | 1.00 | 0.00 |
| ATOM | 1606 | CG  | GLN | 102 | 5.051 | -16.628 | 11.111 | 1.00 | 0.00 |
| ATOM | 1607 | HG2 | GLN | 102 | 4.813 | -15.575 | 11.263 | 1.00 | 0.00 |

|      |      |      |     |     |        |         |        |      |      |
|------|------|------|-----|-----|--------|---------|--------|------|------|
| ATOM | 1608 | HG3  | GLN | 102 | 4.711  | -16.937 | 10.122 | 1.00 | 0.00 |
| ATOM | 1609 | CD   | GLN | 102 | 4.318  | -17.446 | 12.153 | 1.00 | 0.00 |
| ATOM | 1610 | OE1  | GLN | 102 | 4.322  | -17.143 | 13.333 | 1.00 | 0.00 |
| ATOM | 1611 | NE2  | GLN | 102 | 3.699  | -18.528 | 11.739 | 1.00 | 0.00 |
| ATOM | 1612 | HE21 | GLN | 102 | 3.198  | -19.103 | 12.400 | 1.00 | 0.00 |
| ATOM | 1613 | HE22 | GLN | 102 | 3.728  | -18.779 | 10.761 | 1.00 | 0.00 |
| ATOM | 1614 | C    | GLN | 102 | 8.795  | -15.666 | 10.887 | 1.00 | 0.00 |
| ATOM | 1615 | O    | GLN | 102 | 9.557  | -15.521 | 9.926  | 1.00 | 0.00 |
| ATOM | 1616 | N    | MET | 103 | 9.209  | -15.843 | 12.140 | 1.00 | 0.00 |
| ATOM | 1617 | H    | MET | 103 | 8.531  | -15.780 | 12.886 | 1.00 | 0.00 |
| ATOM | 1618 | CA   | MET | 103 | 10.609 | -16.043 | 12.493 | 1.00 | 0.00 |
| ATOM | 1619 | HA   | MET | 103 | 11.273 | -15.644 | 11.725 | 1.00 | 0.00 |
| ATOM | 1620 | CB   | MET | 103 | 10.861 | -15.285 | 13.800 | 1.00 | 0.00 |
| ATOM | 1621 | HB2  | MET | 103 | 9.999  | -14.652 | 14.010 | 1.00 | 0.00 |
| ATOM | 1622 | HB3  | MET | 103 | 10.986 | -16.007 | 14.606 | 1.00 | 0.00 |
| ATOM | 1623 | CG   | MET | 103 | 12.116 | -14.418 | 13.695 | 1.00 | 0.00 |
| ATOM | 1624 | HG2  | MET | 103 | 12.450 | -14.410 | 12.657 | 1.00 | 0.00 |
| ATOM | 1625 | HG3  | MET | 103 | 11.867 | -13.402 | 14.003 | 1.00 | 0.00 |
| ATOM | 1626 | SD   | MET | 103 | 13.450 | -15.049 | 14.745 | 1.00 | 0.00 |
| ATOM | 1627 | CE   | MET | 103 | 13.767 | -13.576 | 15.729 | 1.00 | 0.00 |
| ATOM | 1628 | HE1  | MET | 103 | 12.863 | -13.299 | 16.271 | 1.00 | 0.00 |
| ATOM | 1629 | HE2  | MET | 103 | 14.568 | -13.778 | 16.439 | 1.00 | 0.00 |

|      |      |     |     |     |         |         |        |      |      |
|------|------|-----|-----|-----|---------|---------|--------|------|------|
| ATOM | 1630 | HE3 | MET | 103 | 14.062  | -12.756 | 15.073 | 1.00 | 0.00 |
| ATOM | 1631 | C   | MET | 103 | 11.009  | -17.529 | 12.611 | 1.00 | 0.00 |
| ATOM | 1632 | O   | MET | 103 | 10.127  | -18.294 | 13.080 | 1.00 | 0.00 |
| ATOM | 1633 | OXT | MET | 103 | 12.181  | -17.804 | 12.255 | 1.00 | 0.00 |
| TER  |      |     |     |     |         |         |        |      |      |
| ATOM | 1634 | S1  | LIG | 104 | -28.224 | 20.354  | 5.931  | 1.00 | 0.00 |
| ATOM | 1635 | O1  | LIG | 104 | -26.675 | 19.963  | 5.656  | 1.00 | 0.00 |
| ATOM | 1636 | O2  | LIG | 104 | -28.851 | 19.588  | 4.655  | 1.00 | 0.00 |
| ATOM | 1637 | H26 | LIG | 104 | -28.661 | 20.090  | 3.848  | 1.00 | 0.00 |
| ATOM | 1638 | O3  | LIG | 104 | -28.713 | 19.667  | 7.100  | 1.00 | 0.00 |
| ATOM | 1639 | O4  | LIG | 104 | -28.387 | 21.785  | 5.769  | 1.00 | 0.00 |
| ATOM | 1640 | C1  | LIG | 104 | -19.351 | 19.713  | 7.330  | 1.00 | 0.00 |
| ATOM | 1641 | H1  | LIG | 104 | -19.362 | 18.626  | 7.179  | 1.00 | 0.00 |
| ATOM | 1642 | H2  | LIG | 104 | -19.114 | 20.152  | 6.352  | 1.00 | 0.00 |
| ATOM | 1643 | C2  | LIG | 104 | -18.243 | 20.074  | 8.326  | 1.00 | 0.00 |
| ATOM | 1644 | H3  | LIG | 104 | -18.478 | 19.634  | 9.304  | 1.00 | 0.00 |
| ATOM | 1645 | H4  | LIG | 104 | -18.231 | 21.161  | 8.477  | 1.00 | 0.00 |
| ATOM | 1646 | C3  | LIG | 104 | -20.743 | 20.177  | 7.769  | 1.00 | 0.00 |
| ATOM | 1647 | H5  | LIG | 104 | -20.733 | 21.265  | 7.917  | 1.00 | 0.00 |
| ATOM | 1648 | H6  | LIG | 104 | -20.978 | 19.739  | 8.748  | 1.00 | 0.00 |
| ATOM | 1649 | C4  | LIG | 104 | -16.848 | 19.612  | 7.888  | 1.00 | 0.00 |
| ATOM | 1650 | H7  | LIG | 104 | -16.611 | 20.052  | 6.910  | 1.00 | 0.00 |

|      |      |     |     |     |         |        |        |      |      |
|------|------|-----|-----|-----|---------|--------|--------|------|------|
| ATOM | 1651 | H8  | LIG | 104 | -16.859 | 18.525 | 7.736  | 1.00 | 0.00 |
| ATOM | 1652 | C5  | LIG | 104 | -21.852 | 19.813 | 6.775  | 1.00 | 0.00 |
| ATOM | 1653 | H9  | LIG | 104 | -21.617 | 20.249 | 5.795  | 1.00 | 0.00 |
| ATOM | 1654 | H10 | LIG | 104 | -21.866 | 18.726 | 6.629  | 1.00 | 0.00 |
| ATOM | 1655 | C6  | LIG | 104 | -15.740 | 19.971 | 8.884  | 1.00 | 0.00 |
| ATOM | 1656 | H11 | LIG | 104 | -15.976 | 19.532 | 9.862  | 1.00 | 0.00 |
| ATOM | 1657 | H12 | LIG | 104 | -15.729 | 21.059 | 9.036  | 1.00 | 0.00 |
| ATOM | 1658 | C7  | LIG | 104 | -23.243 | 20.282 | 7.216  | 1.00 | 0.00 |
| ATOM | 1659 | H13 | LIG | 104 | -23.476 | 19.848 | 8.197  | 1.00 | 0.00 |
| ATOM | 1660 | H14 | LIG | 104 | -23.229 | 21.370 | 7.357  | 1.00 | 0.00 |
| ATOM | 1661 | C8  | LIG | 104 | -14.346 | 19.509 | 8.447  | 1.00 | 0.00 |
| ATOM | 1662 | H15 | LIG | 104 | -14.355 | 18.422 | 8.295  | 1.00 | 0.00 |
| ATOM | 1663 | H16 | LIG | 104 | -14.109 | 19.949 | 7.469  | 1.00 | 0.00 |
| ATOM | 1664 | C9  | LIG | 104 | -24.344 | 19.907 | 6.215  | 1.00 | 0.00 |
| ATOM | 1665 | H17 | LIG | 104 | -24.379 | 18.820 | 6.085  | 1.00 | 0.00 |
| ATOM | 1666 | H18 | LIG | 104 | -24.124 | 20.342 | 5.235  | 1.00 | 0.00 |
| ATOM | 1667 | C10 | LIG | 104 | -13.236 | 19.869 | 9.442  | 1.00 | 0.00 |
| ATOM | 1668 | H19 | LIG | 104 | -13.474 | 19.430 | 10.419 | 1.00 | 0.00 |
| ATOM | 1669 | H20 | LIG | 104 | -13.226 | 20.956 | 9.593  | 1.00 | 0.00 |
| ATOM | 1670 | C11 | LIG | 104 | -25.708 | 20.388 | 6.673  | 1.00 | 0.00 |
| ATOM | 1671 | H21 | LIG | 104 | -25.996 | 19.940 | 7.627  | 1.00 | 0.00 |
| ATOM | 1672 | H22 | LIG | 104 | -25.748 | 21.478 | 6.754  | 1.00 | 0.00 |

|      |      |     |     |     |         |         |        |      |      |
|------|------|-----|-----|-----|---------|---------|--------|------|------|
| ATOM | 1673 | C12 | LIG | 104 | -11.847 | 19.402  | 8.997  | 1.00 | 0.00 |
| ATOM | 1674 | H23 | LIG | 104 | -11.568 | 19.852  | 8.038  | 1.00 | 0.00 |
| ATOM | 1675 | H24 | LIG | 104 | -11.081 | 19.675  | 9.726  | 1.00 | 0.00 |
| ATOM | 1676 | H25 | LIG | 104 | -11.816 | 18.315  | 8.873  | 1.00 | 0.00 |
| TER  |      |     |     |     |         |         |        |      |      |
| ATOM | 1677 | S1  | LIG | 105 | 29.217  | -12.416 | 20.059 | 1.00 | 0.00 |
| ATOM | 1678 | O1  | LIG | 105 | 28.212  | -11.370 | 20.783 | 1.00 | 0.00 |
| ATOM | 1679 | O2  | LIG | 105 | 28.991  | -13.646 | 21.081 | 1.00 | 0.00 |
| ATOM | 1680 | H26 | LIG | 105 | 29.455  | -13.469 | 21.913 | 1.00 | 0.00 |
| ATOM | 1681 | O3  | LIG | 105 | 28.675  | -12.834 | 18.791 | 1.00 | 0.00 |
| ATOM | 1682 | O4  | LIG | 105 | 30.576  | -11.927 | 20.180 | 1.00 | 0.00 |
| ATOM | 1683 | C1  | LIG | 105 | 24.478  | -4.873  | 21.383 | 1.00 | 0.00 |
| ATOM | 1684 | H1  | LIG | 105 | 23.543  | -5.432  | 21.512 | 1.00 | 0.00 |
| ATOM | 1685 | H2  | LIG | 105 | 24.890  | -4.731  | 22.390 | 1.00 | 0.00 |
| ATOM | 1686 | C2  | LIG | 105 | 24.168  | -3.503  | 20.768 | 1.00 | 0.00 |
| ATOM | 1687 | H3  | LIG | 105 | 23.756  | -3.643  | 19.761 | 1.00 | 0.00 |
| ATOM | 1688 | H4  | LIG | 105 | 25.104  | -2.943  | 20.638 | 1.00 | 0.00 |
| ATOM | 1689 | C3  | LIG | 105 | 25.456  | -5.709  | 20.550 | 1.00 | 0.00 |
| ATOM | 1690 | H5  | LIG | 105 | 26.393  | -5.150  | 20.422 | 1.00 | 0.00 |
| ATOM | 1691 | H6  | LIG | 105 | 25.045  | -5.848  | 19.541 | 1.00 | 0.00 |
| ATOM | 1692 | C4  | LIG | 105 | 23.191  | -2.664  | 21.600 | 1.00 | 0.00 |
| ATOM | 1693 | H7  | LIG | 105 | 23.603  | -2.522  | 22.608 | 1.00 | 0.00 |



|      |      |     |     |     |        |         |        |      |      |
|------|------|-----|-----|-----|--------|---------|--------|------|------|
| ATOM | 1694 | H8  | LIG | 105 | 22.256 | -3.223  | 21.731 | 1.00 | 0.00 |
| ATOM | 1695 | C5  | LIG | 105 | 25.765 | -7.080  | 21.162 | 1.00 | 0.00 |
| ATOM | 1696 | H9  | LIG | 105 | 26.173 | -6.943  | 22.171 | 1.00 | 0.00 |
| ATOM | 1697 | H10 | LIG | 105 | 24.830 | -7.641  | 21.286 | 1.00 | 0.00 |
| ATOM | 1698 | C6  | LIG | 105 | 22.879 | -1.294  | 20.986 | 1.00 | 0.00 |
| ATOM | 1699 | H11 | LIG | 105 | 22.468 | -1.436  | 19.978 | 1.00 | 0.00 |
| ATOM | 1700 | H12 | LIG | 105 | 23.815 | -0.735  | 20.855 | 1.00 | 0.00 |
| ATOM | 1701 | C7  | LIG | 105 | 26.745 | -7.912  | 20.328 | 1.00 | 0.00 |
| ATOM | 1702 | H13 | LIG | 105 | 26.336 | -8.047  | 19.319 | 1.00 | 0.00 |
| ATOM | 1703 | H14 | LIG | 105 | 27.682 | -7.353  | 20.209 | 1.00 | 0.00 |
| ATOM | 1704 | C8  | LIG | 105 | 21.902 | -0.455  | 21.817 | 1.00 | 0.00 |
| ATOM | 1705 | H15 | LIG | 105 | 20.965 | -1.013  | 21.948 | 1.00 | 0.00 |
| ATOM | 1706 | H16 | LIG | 105 | 22.313 | -0.314  | 22.825 | 1.00 | 0.00 |
| ATOM | 1707 | C9  | LIG | 105 | 27.041 | -9.284  | 20.949 | 1.00 | 0.00 |
| ATOM | 1708 | H17 | LIG | 105 | 26.114 | -9.858  | 21.052 | 1.00 | 0.00 |
| ATOM | 1709 | H18 | LIG | 105 | 27.456 | -9.159  | 21.954 | 1.00 | 0.00 |
| ATOM | 1710 | C10 | LIG | 105 | 21.590 | 0.915   | 21.204 | 1.00 | 0.00 |
| ATOM | 1711 | H19 | LIG | 105 | 21.180 | 0.773   | 20.196 | 1.00 | 0.00 |
| ATOM | 1712 | H20 | LIG | 105 | 22.526 | 1.473   | 21.074 | 1.00 | 0.00 |
| ATOM | 1713 | C11 | LIG | 105 | 28.018 | -10.083 | 20.107 | 1.00 | 0.00 |
| ATOM | 1714 | H21 | LIG | 105 | 27.626 | -10.278 | 19.107 | 1.00 | 0.00 |
| ATOM | 1715 | H22 | LIG | 105 | 28.988 | -9.585  | 20.029 | 1.00 | 0.00 |

|      |      |     |     |     |         |         |        |      |      |
|------|------|-----|-----|-----|---------|---------|--------|------|------|
| ATOM | 1716 | C12 | LIG | 105 | 20.612  | 1.745   | 22.041 | 1.00 | 0.00 |
| ATOM | 1717 | H23 | LIG | 105 | 21.011  | 1.932   | 23.044 | 1.00 | 0.00 |
| ATOM | 1718 | H24 | LIG | 105 | 20.413  | 2.715   | 21.578 | 1.00 | 0.00 |
| ATOM | 1719 | H25 | LIG | 105 | 19.655  | 1.229   | 22.158 | 1.00 | 0.00 |
| TER  |      |     |     |     |         |         |        |      |      |
| ATOM | 1720 | S1  | LIG | 106 | -28.823 | -26.119 | 0.351  | 1.00 | 0.00 |
| ATOM | 1721 | O1  | LIG | 106 | -27.972 | -24.781 | 0.691  | 1.00 | 0.00 |
| ATOM | 1722 | O2  | LIG | 106 | -30.240 | -25.603 | 0.929  | 1.00 | 0.00 |
| ATOM | 1723 | H26 | LIG | 106 | -30.223 | -25.620 | 1.898  | 1.00 | 0.00 |
| ATOM | 1724 | O3  | LIG | 106 | -28.990 | -26.258 | -1.074 | 1.00 | 0.00 |
| ATOM | 1725 | O4  | LIG | 106 | -28.333 | -27.212 | 1.168  | 1.00 | 0.00 |
| ATOM | 1726 | C1  | LIG | 106 | -21.832 | -20.446 | 0.571  | 1.00 | 0.00 |
| ATOM | 1727 | H1  | LIG | 106 | -22.430 | -19.625 | 0.156  | 1.00 | 0.00 |
| ATOM | 1728 | H2  | LIG | 106 | -21.887 | -20.341 | 1.662  | 1.00 | 0.00 |
| ATOM | 1729 | C2  | LIG | 106 | -20.374 | -20.287 | 0.122  | 1.00 | 0.00 |
| ATOM | 1730 | H3  | LIG | 106 | -20.319 | -20.391 | -0.969 | 1.00 | 0.00 |
| ATOM | 1731 | H4  | LIG | 106 | -19.776 | -21.109 | 0.536  | 1.00 | 0.00 |
| ATOM | 1732 | C3  | LIG | 106 | -22.456 | -21.784 | 0.159  | 1.00 | 0.00 |
| ATOM | 1733 | H5  | LIG | 106 | -21.859 | -22.606 | 0.576  | 1.00 | 0.00 |
| ATOM | 1734 | H6  | LIG | 106 | -22.398 | -21.889 | -0.932 | 1.00 | 0.00 |
| ATOM | 1735 | C4  | LIG | 106 | -19.747 | -18.950 | 0.533  | 1.00 | 0.00 |
| ATOM | 1736 | H7  | LIG | 106 | -19.802 | -18.845 | 1.625  | 1.00 | 0.00 |

|      |      |     |     |     |         |         |        |      |      |
|------|------|-----|-----|-----|---------|---------|--------|------|------|
| ATOM | 1737 | H8  | LIG | 106 | -20.346 | -18.128 | 0.121  | 1.00 | 0.00 |
| ATOM | 1738 | C5  | LIG | 106 | -23.914 | -21.942 | 0.605  | 1.00 | 0.00 |
| ATOM | 1739 | H9  | LIG | 106 | -23.973 | -21.835 | 1.696  | 1.00 | 0.00 |
| ATOM | 1740 | H10 | LIG | 106 | -24.512 | -21.124 | 0.186  | 1.00 | 0.00 |
| ATOM | 1741 | C6  | LIG | 106 | -18.291 | -18.790 | 0.084  | 1.00 | 0.00 |
| ATOM | 1742 | H11 | LIG | 106 | -18.236 | -18.895 | -1.007 | 1.00 | 0.00 |
| ATOM | 1743 | H12 | LIG | 106 | -17.692 | -19.612 | 0.498  | 1.00 | 0.00 |
| ATOM | 1744 | C7  | LIG | 106 | -24.534 | -23.282 | 0.194  | 1.00 | 0.00 |
| ATOM | 1745 | H13 | LIG | 106 | -24.472 | -23.390 | -0.896 | 1.00 | 0.00 |
| ATOM | 1746 | H14 | LIG | 106 | -23.938 | -24.101 | 0.618  | 1.00 | 0.00 |
| ATOM | 1747 | C8  | LIG | 106 | -17.663 | -17.453 | 0.495  | 1.00 | 0.00 |
| ATOM | 1748 | H15 | LIG | 106 | -18.261 | -16.629 | 0.082  | 1.00 | 0.00 |
| ATOM | 1749 | H16 | LIG | 106 | -17.719 | -17.348 | 1.587  | 1.00 | 0.00 |
| ATOM | 1750 | C9  | LIG | 106 | -25.995 | -23.426 | 0.641  | 1.00 | 0.00 |
| ATOM | 1751 | H17 | LIG | 106 | -26.602 | -22.626 | 0.205  | 1.00 | 0.00 |
| ATOM | 1752 | H18 | LIG | 106 | -26.065 | -23.328 | 1.729  | 1.00 | 0.00 |
| ATOM | 1753 | C10 | LIG | 106 | -16.206 | -17.292 | 0.047  | 1.00 | 0.00 |
| ATOM | 1754 | H19 | LIG | 106 | -16.152 | -17.398 | -1.044 | 1.00 | 0.00 |
| ATOM | 1755 | H20 | LIG | 106 | -15.609 | -18.113 | 0.461  | 1.00 | 0.00 |
| ATOM | 1756 | C11 | LIG | 106 | -26.580 | -24.763 | 0.229  | 1.00 | 0.00 |
| ATOM | 1757 | H21 | LIG | 106 | -26.579 | -24.888 | -0.857 | 1.00 | 0.00 |
| ATOM | 1758 | H22 | LIG | 106 | -26.051 | -25.599 | 0.694  | 1.00 | 0.00 |

|      |      |     |     |     |         |         |         |      |      |
|------|------|-----|-----|-----|---------|---------|---------|------|------|
| ATOM | 1759 | C12 | LIG | 106 | -15.589 | -15.953 | 0.461   | 1.00 | 0.00 |
| ATOM | 1760 | H23 | LIG | 106 | -15.599 | -15.833 | 1.550   | 1.00 | 0.00 |
| ATOM | 1761 | H24 | LIG | 106 | -14.551 | -15.871 | 0.128   | 1.00 | 0.00 |
| ATOM | 1762 | H25 | LIG | 106 | -16.143 | -15.112 | 0.033   | 1.00 | 0.00 |
| TER  |      |     |     |     |         |         |         |      |      |
| ATOM | 1763 | S1  | LIG | 107 | 10.591  | 11.998  | -18.030 | 1.00 | 0.00 |
| ATOM | 1764 | O1  | LIG | 107 | 12.162  | 11.834  | -17.665 | 1.00 | 0.00 |
| ATOM | 1765 | O2  | LIG | 107 | 10.451  | 10.650  | -18.908 | 1.00 | 0.00 |
| ATOM | 1766 | H26 | LIG | 107 | 10.869  | 10.778  | -19.773 | 1.00 | 0.00 |
| ATOM | 1767 | O3  | LIG | 107 | 9.781   | 11.805  | -16.854 | 1.00 | 0.00 |
| ATOM | 1768 | O4  | LIG | 107 | 10.423  | 13.156  | -18.886 | 1.00 | 0.00 |
| ATOM | 1769 | C1  | LIG | 107 | 18.546  | 13.754  | -14.190 | 1.00 | 0.00 |
| ATOM | 1770 | H1  | LIG | 107 | 18.635  | 12.730  | -13.807 | 1.00 | 0.00 |
| ATOM | 1771 | H2  | LIG | 107 | 19.067  | 13.763  | -15.156 | 1.00 | 0.00 |
| ATOM | 1772 | C2  | LIG | 107 | 19.251  | 14.718  | -13.228 | 1.00 | 0.00 |
| ATOM | 1773 | H3  | LIG | 107 | 18.731  | 14.709  | -12.262 | 1.00 | 0.00 |
| ATOM | 1774 | H4  | LIG | 107 | 19.161  | 15.742  | -13.612 | 1.00 | 0.00 |
| ATOM | 1775 | C3  | LIG | 107 | 17.066  | 14.084  | -14.411 | 1.00 | 0.00 |
| ATOM | 1776 | H5  | LIG | 107 | 16.976  | 15.108  | -14.797 | 1.00 | 0.00 |
| ATOM | 1777 | H6  | LIG | 107 | 16.546  | 14.077  | -13.444 | 1.00 | 0.00 |
| ATOM | 1778 | C4  | LIG | 107 | 20.732  | 14.390  | -13.007 | 1.00 | 0.00 |
| ATOM | 1779 | H7  | LIG | 107 | 21.253  | 14.400  | -13.974 | 1.00 | 0.00 |

|      |      |     |     |     |        |        |         |      |      |
|------|------|-----|-----|-----|--------|--------|---------|------|------|
| ATOM | 1780 | H8  | LIG | 107 | 20.823 | 13.366 | -12.625 | 1.00 | 0.00 |
| ATOM | 1781 | C5  | LIG | 107 | 16.359 | 13.119 | -15.370 | 1.00 | 0.00 |
| ATOM | 1782 | H9  | LIG | 107 | 16.880 | 13.123 | -16.336 | 1.00 | 0.00 |
| ATOM | 1783 | H10 | LIG | 107 | 16.445 | 12.096 | -14.983 | 1.00 | 0.00 |
| ATOM | 1784 | C6  | LIG | 107 | 21.437 | 15.353 | -12.045 | 1.00 | 0.00 |
| ATOM | 1785 | H11 | LIG | 107 | 20.916 | 15.344 | -11.079 | 1.00 | 0.00 |
| ATOM | 1786 | H12 | LIG | 107 | 21.347 | 16.378 | -12.427 | 1.00 | 0.00 |
| ATOM | 1787 | C7  | LIG | 107 | 14.880 | 13.453 | -15.590 | 1.00 | 0.00 |
| ATOM | 1788 | H13 | LIG | 107 | 14.361 | 13.451 | -14.623 | 1.00 | 0.00 |
| ATOM | 1789 | H14 | LIG | 107 | 14.796 | 14.475 | -15.982 | 1.00 | 0.00 |
| ATOM | 1790 | C8  | LIG | 107 | 22.918 | 15.026 | -11.823 | 1.00 | 0.00 |
| ATOM | 1791 | H15 | LIG | 107 | 23.010 | 14.001 | -11.439 | 1.00 | 0.00 |
| ATOM | 1792 | H16 | LIG | 107 | 23.439 | 15.035 | -12.789 | 1.00 | 0.00 |
| ATOM | 1793 | C9  | LIG | 107 | 14.183 | 12.477 | -16.548 | 1.00 | 0.00 |
| ATOM | 1794 | H17 | LIG | 107 | 14.244 | 11.457 | -16.154 | 1.00 | 0.00 |
| ATOM | 1795 | H18 | LIG | 107 | 14.690 | 12.478 | -17.518 | 1.00 | 0.00 |
| ATOM | 1796 | C10 | LIG | 107 | 23.624 | 15.988 | -10.861 | 1.00 | 0.00 |
| ATOM | 1797 | H19 | LIG | 107 | 23.103 | 15.979 | -9.896  | 1.00 | 0.00 |
| ATOM | 1798 | H20 | LIG | 107 | 23.534 | 17.012 | -11.245 | 1.00 | 0.00 |
| ATOM | 1799 | C11 | LIG | 107 | 12.724 | 12.836 | -16.753 | 1.00 | 0.00 |
| ATOM | 1800 | H21 | LIG | 107 | 12.163 | 12.799 | -15.817 | 1.00 | 0.00 |
| ATOM | 1801 | H22 | LIG | 107 | 12.609 | 13.822 | -17.211 | 1.00 | 0.00 |

|      |      |     |     |     |        |        |         |      |      |
|------|------|-----|-----|-----|--------|--------|---------|------|------|
| ATOM | 1802 | C12 | LIG | 107 | 25.103 | 15.653 | -10.645 | 1.00 | 0.00 |
| ATOM | 1803 | H23 | LIG | 107 | 25.658 | 15.687 | -11.589 | 1.00 | 0.00 |
| ATOM | 1804 | H24 | LIG | 107 | 25.577 | 16.358 | -9.957  | 1.00 | 0.00 |
| ATOM | 1805 | H25 | LIG | 107 | 25.224 | 14.648 | -10.228 | 1.00 | 0.00 |
| TER  |      |     |     |     |        |        |         |      |      |
| ATOM | 1806 | S1  | LIG | 108 | 3.172  | -2.043 | -20.546 | 1.00 | 0.00 |
| ATOM | 1807 | O1  | LIG | 108 | 4.571  | -2.177 | -19.737 | 1.00 | 0.00 |
| ATOM | 1808 | O2  | LIG | 108 | 2.833  | -3.620 | -20.618 | 1.00 | 0.00 |
| ATOM | 1809 | H26 | LIG | 108 | 3.402  | -4.047 | -21.276 | 1.00 | 0.00 |
| ATOM | 1810 | O3  | LIG | 108 | 2.164  | -1.446 | -19.706 | 1.00 | 0.00 |
| ATOM | 1811 | O4  | LIG | 108 | 3.444  | -1.542 | -21.879 | 1.00 | 0.00 |
| ATOM | 1812 | C1  | LIG | 108 | 10.599 | 0.505  | -16.134 | 1.00 | 0.00 |
| ATOM | 1813 | H1  | LIG | 108 | 10.361 | -0.137 | -15.276 | 1.00 | 0.00 |
| ATOM | 1814 | H2  | LIG | 108 | 11.251 | -0.089 | -16.787 | 1.00 | 0.00 |
| ATOM | 1815 | C2  | LIG | 108 | 11.365 | 1.740  | -15.645 | 1.00 | 0.00 |
| ATOM | 1816 | H3  | LIG | 108 | 10.713 | 2.334  | -14.992 | 1.00 | 0.00 |
| ATOM | 1817 | H4  | LIG | 108 | 11.602 | 2.383  | -16.503 | 1.00 | 0.00 |
| ATOM | 1818 | C3  | LIG | 108 | 9.306  | 0.845  | -16.884 | 1.00 | 0.00 |
| ATOM | 1819 | H5  | LIG | 108 | 9.544  | 1.485  | -17.744 | 1.00 | 0.00 |
| ATOM | 1820 | H6  | LIG | 108 | 8.655  | 1.441  | -16.232 | 1.00 | 0.00 |
| ATOM | 1821 | C4  | LIG | 108 | 12.659 | 1.403  | -14.895 | 1.00 | 0.00 |
| ATOM | 1822 | H7  | LIG | 108 | 13.311 | 0.809  | -15.549 | 1.00 | 0.00 |

|      |      |     |     |     |        |        |         |      |      |
|------|------|-----|-----|-----|--------|--------|---------|------|------|
| ATOM | 1823 | H8  | LIG | 108 | 12.422 | 0.759  | -14.038 | 1.00 | 0.00 |
| ATOM | 1824 | C5  | LIG | 108 | 8.538  | -0.389 | -17.371 | 1.00 | 0.00 |
| ATOM | 1825 | H9  | LIG | 108 | 9.189  | -0.988 | -18.022 | 1.00 | 0.00 |
| ATOM | 1826 | H10 | LIG | 108 | 8.297  | -1.028 | -16.512 | 1.00 | 0.00 |
| ATOM | 1827 | C6  | LIG | 108 | 13.425 | 2.637  | -14.405 | 1.00 | 0.00 |
| ATOM | 1828 | H11 | LIG | 108 | 12.772 | 3.231  | -13.752 | 1.00 | 0.00 |
| ATOM | 1829 | H12 | LIG | 108 | 13.661 | 3.280  | -15.263 | 1.00 | 0.00 |
| ATOM | 1830 | C7  | LIG | 108 | 7.248  | -0.046 | -18.123 | 1.00 | 0.00 |
| ATOM | 1831 | H13 | LIG | 108 | 6.599  | 0.554  | -17.472 | 1.00 | 0.00 |
| ATOM | 1832 | H14 | LIG | 108 | 7.491  | 0.589  | -18.985 | 1.00 | 0.00 |
| ATOM | 1833 | C8  | LIG | 108 | 14.718 | 2.301  | -13.655 | 1.00 | 0.00 |
| ATOM | 1834 | H15 | LIG | 108 | 14.483 | 1.658  | -12.796 | 1.00 | 0.00 |
| ATOM | 1835 | H16 | LIG | 108 | 15.371 | 1.706  | -14.307 | 1.00 | 0.00 |
| ATOM | 1836 | C9  | LIG | 108 | 6.486  | -1.290 | -18.600 | 1.00 | 0.00 |
| ATOM | 1837 | H17 | LIG | 108 | 6.220  | -1.919 | -17.744 | 1.00 | 0.00 |
| ATOM | 1838 | H18 | LIG | 108 | 7.123  | -1.891 | -19.256 | 1.00 | 0.00 |
| ATOM | 1839 | C10 | LIG | 108 | 15.485 | 3.534  | -13.164 | 1.00 | 0.00 |
| ATOM | 1840 | H19 | LIG | 108 | 14.833 | 4.128  | -12.513 | 1.00 | 0.00 |
| ATOM | 1841 | H20 | LIG | 108 | 15.722 | 4.175  | -14.022 | 1.00 | 0.00 |
| ATOM | 1842 | C11 | LIG | 108 | 5.219  | -0.921 | -19.347 | 1.00 | 0.00 |
| ATOM | 1843 | H21 | LIG | 108 | 4.525  | -0.360 | -18.715 | 1.00 | 0.00 |
| ATOM | 1844 | H22 | LIG | 108 | 5.433  | -0.347 | -20.253 | 1.00 | 0.00 |

|      |      |     |     |     |        |        |         |      |      |
|------|------|-----|-----|-----|--------|--------|---------|------|------|
| ATOM | 1845 | C12 | LIG | 108 | 16.775 | 3.187  | -12.415 | 1.00 | 0.00 |
| ATOM | 1846 | H23 | LIG | 108 | 17.463 | 2.622  | -13.054 | 1.00 | 0.00 |
| ATOM | 1847 | H24 | LIG | 108 | 17.298 | 4.087  | -12.081 | 1.00 | 0.00 |
| ATOM | 1848 | H25 | LIG | 108 | 16.568 | 2.576  | -11.532 | 1.00 | 0.00 |
| TER  |      |     |     |     |        |        |         |      |      |
| ATOM | 1849 | S1  | LIG | 109 | -7.342 | -0.059 | -15.897 | 1.00 | 0.00 |
| ATOM | 1850 | O1  | LIG | 109 | -7.218 | 1.513  | -16.275 | 1.00 | 0.00 |
| ATOM | 1851 | O2  | LIG | 109 | -8.445 | -0.443 | -17.012 | 1.00 | 0.00 |
| ATOM | 1852 | H26 | LIG | 109 | -9.313 | -0.106 | -16.742 | 1.00 | 0.00 |
| ATOM | 1853 | O3  | LIG | 109 | -6.134 | -0.757 | -16.261 | 1.00 | 0.00 |
| ATOM | 1854 | O4  | LIG | 109 | -7.922 | -0.183 | -14.575 | 1.00 | 0.00 |
| ATOM | 1855 | C1  | LIG | 109 | -4.267 | 8.404  | -15.712 | 1.00 | 0.00 |
| ATOM | 1856 | H1  | LIG | 109 | -4.109 | 8.416  | -16.797 | 1.00 | 0.00 |
| ATOM | 1857 | H2  | LIG | 109 | -5.270 | 8.818  | -15.546 | 1.00 | 0.00 |
| ATOM | 1858 | C2  | LIG | 109 | -3.230 | 9.311  | -15.039 | 1.00 | 0.00 |
| ATOM | 1859 | H3  | LIG | 109 | -2.227 | 8.899  | -15.205 | 1.00 | 0.00 |
| ATOM | 1860 | H4  | LIG | 109 | -3.387 | 9.299  | -13.953 | 1.00 | 0.00 |
| ATOM | 1861 | C3  | LIG | 109 | -4.228 | 6.956  | -15.211 | 1.00 | 0.00 |
| ATOM | 1862 | H5  | LIG | 109 | -4.389 | 6.944  | -14.125 | 1.00 | 0.00 |
| ATOM | 1863 | H6  | LIG | 109 | -3.224 | 6.544  | -15.375 | 1.00 | 0.00 |
| ATOM | 1864 | C4  | LIG | 109 | -3.267 | 10.761 | -15.538 | 1.00 | 0.00 |
| ATOM | 1865 | H7  | LIG | 109 | -4.271 | 11.175 | -15.371 | 1.00 | 0.00 |



|      |      |     |     |     |        |        |         |      |      |
|------|------|-----|-----|-----|--------|--------|---------|------|------|
| ATOM | 1866 | H8  | LIG | 109 | -3.111 | 10.774 | -16.624 | 1.00 | 0.00 |
| ATOM | 1867 | C5  | LIG | 109 | -5.263 | 6.048  | -15.885 | 1.00 | 0.00 |
| ATOM | 1868 | H9  | LIG | 109 | -6.267 | 6.460  | -15.724 | 1.00 | 0.00 |
| ATOM | 1869 | H10 | LIG | 109 | -5.101 | 6.056  | -16.970 | 1.00 | 0.00 |
| ATOM | 1870 | C6  | LIG | 109 | -2.230 | 11.668 | -14.867 | 1.00 | 0.00 |
| ATOM | 1871 | H11 | LIG | 109 | -1.227 | 11.255 | -15.033 | 1.00 | 0.00 |
| ATOM | 1872 | H12 | LIG | 109 | -2.386 | 11.656 | -13.780 | 1.00 | 0.00 |
| ATOM | 1873 | C7  | LIG | 109 | -5.224 | 4.601  | -15.380 | 1.00 | 0.00 |
| ATOM | 1874 | H13 | LIG | 109 | -4.219 | 4.190  | -15.539 | 1.00 | 0.00 |
| ATOM | 1875 | H14 | LIG | 109 | -5.391 | 4.593  | -14.295 | 1.00 | 0.00 |
| ATOM | 1876 | C8  | LIG | 109 | -2.266 | 13.118 | -15.365 | 1.00 | 0.00 |
| ATOM | 1877 | H15 | LIG | 109 | -2.109 | 13.132 | -16.451 | 1.00 | 0.00 |
| ATOM | 1878 | H16 | LIG | 109 | -3.270 | 13.532 | -15.199 | 1.00 | 0.00 |
| ATOM | 1879 | C9  | LIG | 109 | -6.260 | 3.701  | -16.066 | 1.00 | 0.00 |
| ATOM | 1880 | H17 | LIG | 109 | -6.088 | 3.686  | -17.147 | 1.00 | 0.00 |
| ATOM | 1881 | H18 | LIG | 109 | -7.267 | 4.099  | -15.906 | 1.00 | 0.00 |
| ATOM | 1882 | C10 | LIG | 109 | -1.229 | 14.026 | -14.694 | 1.00 | 0.00 |
| ATOM | 1883 | H19 | LIG | 109 | -0.228 | 13.612 | -14.860 | 1.00 | 0.00 |
| ATOM | 1884 | H20 | LIG | 109 | -1.388 | 14.013 | -13.609 | 1.00 | 0.00 |
| ATOM | 1885 | C11 | LIG | 109 | -6.204 | 2.279  | -15.542 | 1.00 | 0.00 |
| ATOM | 1886 | H21 | LIG | 109 | -5.230 | 1.818  | -15.726 | 1.00 | 0.00 |
| ATOM | 1887 | H22 | LIG | 109 | -6.438 | 2.229  | -14.476 | 1.00 | 0.00 |

|      |      |     |     |     |         |        |         |      |      |
|------|------|-----|-----|-----|---------|--------|---------|------|------|
| ATOM | 1888 | C12 | LIG | 109 | -1.274  | 15.472 | -15.199 | 1.00 | 0.00 |
| ATOM | 1889 | H23 | LIG | 109 | -2.254  | 15.924 | -15.017 | 1.00 | 0.00 |
| ATOM | 1890 | H24 | LIG | 109 | -0.525  | 16.092 | -14.701 | 1.00 | 0.00 |
| ATOM | 1891 | H25 | LIG | 109 | -1.084  | 15.521 | -16.276 | 1.00 | 0.00 |
| TER  |      |     |     |     |         |        |         |      |      |
| ATOM | 1892 | S1  | LIG | 110 | -12.646 | 17.201 | 19.575  | 1.00 | 0.00 |
| ATOM | 1893 | O1  | LIG | 110 | -11.123 | 17.162 | 20.131  | 1.00 | 0.00 |
| ATOM | 1894 | O2  | LIG | 110 | -13.293 | 16.247 | 20.706  | 1.00 | 0.00 |
| ATOM | 1895 | H26 | LIG | 110 | -13.044 | 15.325 | 20.537  | 1.00 | 0.00 |
| ATOM | 1896 | O3  | LIG | 110 | -13.216 | 18.511 | 19.771  | 1.00 | 0.00 |
| ATOM | 1897 | O4  | LIG | 110 | -12.697 | 16.536 | 18.289  | 1.00 | 0.00 |
| ATOM | 1898 | C1  | LIG | 110 | -3.885  | 19.193 | 20.209  | 1.00 | 0.00 |
| ATOM | 1899 | H1  | LIG | 110 | -3.974  | 19.435 | 21.275  | 1.00 | 0.00 |
| ATOM | 1900 | H2  | LIG | 110 | -3.591  | 18.137 | 20.161  | 1.00 | 0.00 |
| ATOM | 1901 | C2  | LIG | 110 | -2.781  | 20.053 | 19.584  | 1.00 | 0.00 |
| ATOM | 1902 | H3  | LIG | 110 | -3.075  | 21.110 | 19.632  | 1.00 | 0.00 |
| ATOM | 1903 | H4  | LIG | 110 | -2.693  | 19.811 | 18.517  | 1.00 | 0.00 |
| ATOM | 1904 | C3  | LIG | 110 | -5.251  | 19.367 | 19.536  | 1.00 | 0.00 |
| ATOM | 1905 | H5  | LIG | 110 | -5.163  | 19.122 | 18.469  | 1.00 | 0.00 |
| ATOM | 1906 | H6  | LIG | 110 | -5.544  | 20.425 | 19.582  | 1.00 | 0.00 |
| ATOM | 1907 | C4  | LIG | 110 | -1.413  | 19.880 | 20.254  | 1.00 | 0.00 |
| ATOM | 1908 | H7  | LIG | 110 | -1.118  | 18.823 | 20.206  | 1.00 | 0.00 |

|      |      |     |     |     |         |        |        |      |      |
|------|------|-----|-----|-----|---------|--------|--------|------|------|
| ATOM | 1909 | H8  | LIG | 110 | -1.501  | 20.120 | 21.322 | 1.00 | 0.00 |
| ATOM | 1910 | C5  | LIG | 110 | -6.356  | 18.510 | 20.162 | 1.00 | 0.00 |
| ATOM | 1911 | H9  | LIG | 110 | -6.064  | 17.453 | 20.119 | 1.00 | 0.00 |
| ATOM | 1912 | H10 | LIG | 110 | -6.448  | 18.756 | 21.227 | 1.00 | 0.00 |
| ATOM | 1913 | C6  | LIG | 110 | -0.309  | 20.740 | 19.631 | 1.00 | 0.00 |
| ATOM | 1914 | H11 | LIG | 110 | -0.604  | 21.796 | 19.679 | 1.00 | 0.00 |
| ATOM | 1915 | H12 | LIG | 110 | -0.221  | 20.499 | 18.563 | 1.00 | 0.00 |
| ATOM | 1916 | C7  | LIG | 110 | -7.720  | 18.685 | 19.485 | 1.00 | 0.00 |
| ATOM | 1917 | H13 | LIG | 110 | -8.011  | 19.742 | 19.527 | 1.00 | 0.00 |
| ATOM | 1918 | H14 | LIG | 110 | -7.629  | 18.433 | 18.421 | 1.00 | 0.00 |
| ATOM | 1919 | C8  | LIG | 110 | 1.059   | 20.567 | 20.301 | 1.00 | 0.00 |
| ATOM | 1920 | H15 | LIG | 110 | 0.973   | 20.809 | 21.369 | 1.00 | 0.00 |
| ATOM | 1921 | H16 | LIG | 110 | 1.354   | 19.510 | 20.254 | 1.00 | 0.00 |
| ATOM | 1922 | C9  | LIG | 110 | -8.819  | 17.825 | 20.124 | 1.00 | 0.00 |
| ATOM | 1923 | H17 | LIG | 110 | -8.931  | 18.085 | 21.182 | 1.00 | 0.00 |
| ATOM | 1924 | H18 | LIG | 110 | -8.540  | 16.767 | 20.080 | 1.00 | 0.00 |
| ATOM | 1925 | C10 | LIG | 110 | 2.164   | 21.427 | 19.678 | 1.00 | 0.00 |
| ATOM | 1926 | H19 | LIG | 110 | 1.868   | 22.483 | 19.726 | 1.00 | 0.00 |
| ATOM | 1927 | H20 | LIG | 110 | 2.251   | 21.185 | 18.612 | 1.00 | 0.00 |
| ATOM | 1928 | C11 | LIG | 110 | -10.154 | 18.012 | 19.431 | 1.00 | 0.00 |
| ATOM | 1929 | H21 | LIG | 110 | -10.501 | 19.047 | 19.492 | 1.00 | 0.00 |
| ATOM | 1930 | H22 | LIG | 110 | -10.116 | 17.701 | 18.383 | 1.00 | 0.00 |

|      |      |     |     |     |         |        |        |      |      |
|------|------|-----|-----|-----|---------|--------|--------|------|------|
| ATOM | 1931 | C12 | LIG | 110 | 3.526   | 21.248 | 20.355 | 1.00 | 0.00 |
| ATOM | 1932 | H23 | LIG | 110 | 3.863   | 20.208 | 20.294 | 1.00 | 0.00 |
| ATOM | 1933 | H24 | LIG | 110 | 4.291   | 21.872 | 19.887 | 1.00 | 0.00 |
| ATOM | 1934 | H25 | LIG | 110 | 3.480   | 21.517 | 21.415 | 1.00 | 0.00 |
| TER  |      |     |     |     |         |        |        |      |      |
| ATOM | 1935 | S1  | LIG | 111 | -20.193 | -8.510 | 3.035  | 1.00 | 0.00 |
| ATOM | 1936 | O1  | LIG | 111 | -20.335 | -6.989 | 2.491  | 1.00 | 0.00 |
| ATOM | 1937 | O2  | LIG | 111 | -20.761 | -9.246 | 1.713  | 1.00 | 0.00 |
| ATOM | 1938 | H26 | LIG | 111 | -21.723 | -9.140 | 1.669  | 1.00 | 0.00 |
| ATOM | 1939 | O3  | LIG | 111 | -18.803 | -8.876 | 3.140  | 1.00 | 0.00 |
| ATOM | 1940 | O4  | LIG | 111 | -21.116 | -8.707 | 4.135  | 1.00 | 0.00 |
| ATOM | 1941 | C1  | LIG | 111 | -19.449 | 0.464  | 2.907  | 1.00 | 0.00 |
| ATOM | 1942 | H1  | LIG | 111 | -18.962 | 0.453  | 1.924  | 1.00 | 0.00 |
| ATOM | 1943 | H2  | LIG | 111 | -20.520 | 0.600  | 2.714  | 1.00 | 0.00 |
| ATOM | 1944 | C2  | LIG | 111 | -18.926 | 1.657  | 3.716  | 1.00 | 0.00 |
| ATOM | 1945 | H3  | LIG | 111 | -17.854 | 1.522  | 3.909  | 1.00 | 0.00 |
| ATOM | 1946 | H4  | LIG | 111 | -19.412 | 1.668  | 4.700  | 1.00 | 0.00 |
| ATOM | 1947 | C3  | LIG | 111 | -19.227 | -0.887 | 3.596  | 1.00 | 0.00 |
| ATOM | 1948 | H5  | LIG | 111 | -19.715 | -0.876 | 4.580  | 1.00 | 0.00 |
| ATOM | 1949 | H6  | LIG | 111 | -18.154 | -1.021 | 3.791  | 1.00 | 0.00 |
| ATOM | 1950 | C4  | LIG | 111 | -19.148 | 3.010  | 3.029  | 1.00 | 0.00 |
| ATOM | 1951 | H7  | LIG | 111 | -20.221 | 3.146  | 2.837  | 1.00 | 0.00 |

|      |      |     |     |     |         |        |       |      |      |
|------|------|-----|-----|-----|---------|--------|-------|------|------|
| ATOM | 1952 | H8  | LIG | 111 | -18.663 | 2.999  | 2.044 | 1.00 | 0.00 |
| ATOM | 1953 | C5  | LIG | 111 | -19.746 | -2.080 | 2.787 | 1.00 | 0.00 |
| ATOM | 1954 | H9  | LIG | 111 | -20.817 | -1.946 | 2.589 | 1.00 | 0.00 |
| ATOM | 1955 | H10 | LIG | 111 | -19.255 | -2.094 | 1.805 | 1.00 | 0.00 |
| ATOM | 1956 | C6  | LIG | 111 | -18.625 | 4.203  | 3.837 | 1.00 | 0.00 |
| ATOM | 1957 | H11 | LIG | 111 | -17.553 | 4.066  | 4.029 | 1.00 | 0.00 |
| ATOM | 1958 | H12 | LIG | 111 | -19.111 | 4.214  | 4.822 | 1.00 | 0.00 |
| ATOM | 1959 | C7  | LIG | 111 | -19.525 | -3.429 | 3.480 | 1.00 | 0.00 |
| ATOM | 1960 | H13 | LIG | 111 | -18.454 | -3.561 | 3.680 | 1.00 | 0.00 |
| ATOM | 1961 | H14 | LIG | 111 | -20.020 | -3.416 | 4.459 | 1.00 | 0.00 |
| ATOM | 1962 | C8  | LIG | 111 | -18.847 | 5.555  | 3.150 | 1.00 | 0.00 |
| ATOM | 1963 | H15 | LIG | 111 | -18.361 | 5.546  | 2.165 | 1.00 | 0.00 |
| ATOM | 1964 | H16 | LIG | 111 | -19.919 | 5.691  | 2.957 | 1.00 | 0.00 |
| ATOM | 1965 | C9  | LIG | 111 | -20.044 | -4.616 | 2.658 | 1.00 | 0.00 |
| ATOM | 1966 | H17 | LIG | 111 | -19.539 | -4.648 | 1.686 | 1.00 | 0.00 |
| ATOM | 1967 | H18 | LIG | 111 | -21.114 | -4.495 | 2.460 | 1.00 | 0.00 |
| ATOM | 1968 | C10 | LIG | 111 | -18.324 | 6.749  | 3.957 | 1.00 | 0.00 |
| ATOM | 1969 | H19 | LIG | 111 | -17.253 | 6.612  | 4.150 | 1.00 | 0.00 |
| ATOM | 1970 | H20 | LIG | 111 | -18.811 | 6.760  | 4.940 | 1.00 | 0.00 |
| ATOM | 1971 | C11 | LIG | 111 | -19.819 | -5.935 | 3.370 | 1.00 | 0.00 |
| ATOM | 1972 | H21 | LIG | 111 | -18.757 | -6.125 | 3.545 | 1.00 | 0.00 |
| ATOM | 1973 | H22 | LIG | 111 | -20.360 | -5.982 | 4.319 | 1.00 | 0.00 |

|      |      |     |     |     |         |       |       |      |      |
|------|------|-----|-----|-----|---------|-------|-------|------|------|
| ATOM | 1974 | C12 | LIG | 111 | -18.550 | 8.095 | 3.262 | 1.00 | 0.00 |
| ATOM | 1975 | H23 | LIG | 111 | -19.615 | 8.276 | 3.086 | 1.00 | 0.00 |
| ATOM | 1976 | H24 | LIG | 111 | -18.168 | 8.925 | 3.864 | 1.00 | 0.00 |
| ATOM | 1977 | H25 | LIG | 111 | -18.045 | 8.129 | 2.292 | 1.00 | 0.00 |

TER

|      |      |     |     |     |        |        |         |      |      |
|------|------|-----|-----|-----|--------|--------|---------|------|------|
| ATOM | 1978 | S1  | LIG | 112 | 13.262 | 31.030 | -11.893 | 1.00 | 0.00 |
| ATOM | 1979 | O1  | LIG | 112 | 13.926 | 29.581 | -11.594 | 1.00 | 0.00 |
| ATOM | 1980 | O2  | LIG | 112 | 12.336 | 30.570 | -13.133 | 1.00 | 0.00 |
| ATOM | 1981 | H26 | LIG | 112 | 12.885 | 30.438 | -13.920 | 1.00 | 0.00 |
| ATOM | 1982 | O3  | LIG | 112 | 12.365 | 31.398 | -10.827 | 1.00 | 0.00 |
| ATOM | 1983 | O4  | LIG | 112 | 14.293 | 31.934 | -12.364 | 1.00 | 0.00 |
| ATOM | 1984 | C1  | LIG | 112 | 18.174 | 24.747 | -7.707  | 1.00 | 0.00 |
| ATOM | 1985 | H1  | LIG | 112 | 17.321 | 24.060 | -7.647  | 1.00 | 0.00 |
| ATOM | 1986 | H2  | LIG | 112 | 18.712 | 24.484 | -8.627  | 1.00 | 0.00 |
| ATOM | 1987 | C2  | LIG | 112 | 19.094 | 24.520 | -6.502  | 1.00 | 0.00 |
| ATOM | 1988 | H3  | LIG | 112 | 18.556 | 24.783 | -5.582  | 1.00 | 0.00 |
| ATOM | 1989 | H4  | LIG | 112 | 19.947 | 25.208 | -6.562  | 1.00 | 0.00 |
| ATOM | 1990 | C3  | LIG | 112 | 17.656 | 26.186 | -7.819  | 1.00 | 0.00 |
| ATOM | 1991 | H5  | LIG | 112 | 18.510 | 26.874 | -7.882  | 1.00 | 0.00 |
| ATOM | 1992 | H6  | LIG | 112 | 17.121 | 26.450 | -6.897  | 1.00 | 0.00 |
| ATOM | 1993 | C4  | LIG | 112 | 19.613 | 23.082 | -6.389  | 1.00 | 0.00 |
| ATOM | 1994 | H7  | LIG | 112 | 20.152 | 22.819 | -7.309  | 1.00 | 0.00 |

|      |      |     |     |     |        |        |         |      |      |
|------|------|-----|-----|-----|--------|--------|---------|------|------|
| ATOM | 1995 | H8  | LIG | 112 | 18.761 | 22.393 | -6.330  | 1.00 | 0.00 |
| ATOM | 1996 | C5  | LIG | 112 | 16.734 | 26.413 | -9.022  | 1.00 | 0.00 |
| ATOM | 1997 | H9  | LIG | 112 | 17.268 | 26.148 | -9.943  | 1.00 | 0.00 |
| ATOM | 1998 | H10 | LIG | 112 | 15.879 | 25.729 | -8.958  | 1.00 | 0.00 |
| ATOM | 1999 | C6  | LIG | 112 | 20.532 | 22.853 | -5.184  | 1.00 | 0.00 |
| ATOM | 2000 | H11 | LIG | 112 | 19.994 | 23.117 | -4.264  | 1.00 | 0.00 |
| ATOM | 2001 | H12 | LIG | 112 | 21.386 | 23.542 | -5.243  | 1.00 | 0.00 |
| ATOM | 2002 | C7  | LIG | 112 | 16.221 | 27.853 | -9.132  | 1.00 | 0.00 |
| ATOM | 2003 | H13 | LIG | 112 | 15.689 | 28.119 | -8.209  | 1.00 | 0.00 |
| ATOM | 2004 | H14 | LIG | 112 | 17.077 | 28.537 | -9.201  | 1.00 | 0.00 |
| ATOM | 2005 | C8  | LIG | 112 | 21.052 | 21.416 | -5.070  | 1.00 | 0.00 |
| ATOM | 2006 | H15 | LIG | 112 | 20.200 | 20.726 | -5.010  | 1.00 | 0.00 |
| ATOM | 2007 | H16 | LIG | 112 | 21.590 | 21.152 | -5.990  | 1.00 | 0.00 |
| ATOM | 2008 | C9  | LIG | 112 | 15.295 | 28.067 | -10.336 | 1.00 | 0.00 |
| ATOM | 2009 | H17 | LIG | 112 | 14.426 | 27.403 | -10.265 | 1.00 | 0.00 |
| ATOM | 2010 | H18 | LIG | 112 | 15.819 | 27.811 | -11.262 | 1.00 | 0.00 |
| ATOM | 2011 | C10 | LIG | 112 | 21.972 | 21.186 | -3.865  | 1.00 | 0.00 |
| ATOM | 2012 | H19 | LIG | 112 | 21.434 | 21.451 | -2.947  | 1.00 | 0.00 |
| ATOM | 2013 | H20 | LIG | 112 | 22.824 | 21.875 | -3.926  | 1.00 | 0.00 |
| ATOM | 2014 | C11 | LIG | 112 | 14.808 | 29.500 | -10.425 | 1.00 | 0.00 |
| ATOM | 2015 | H21 | LIG | 112 | 14.232 | 29.788 | -9.542  | 1.00 | 0.00 |
| ATOM | 2016 | H22 | LIG | 112 | 15.635 | 30.202 | -10.567 | 1.00 | 0.00 |

|      |      |     |     |     |         |         |         |      |      |
|------|------|-----|-----|-----|---------|---------|---------|------|------|
| ATOM | 2017 | C12 | LIG | 112 | 22.485  | 19.747  | -3.760  | 1.00 | 0.00 |
| ATOM | 2018 | H23 | LIG | 112 | 23.056  | 19.465  | -4.651  | 1.00 | 0.00 |
| ATOM | 2019 | H24 | LIG | 112 | 23.138  | 19.618  | -2.893  | 1.00 | 0.00 |
| ATOM | 2020 | H25 | LIG | 112 | 21.657  | 19.038  | -3.662  | 1.00 | 0.00 |
| TER  |      |     |     |     |         |         |         |      |      |
| ATOM | 2021 | S1  | LIG | 113 | -15.876 | -30.306 | -8.692  | 1.00 | 0.00 |
| ATOM | 2022 | O1  | LIG | 113 | -15.670 | -30.080 | -10.285 | 1.00 | 0.00 |
| ATOM | 2023 | O2  | LIG | 113 | -16.648 | -31.721 | -8.792  | 1.00 | 0.00 |
| ATOM | 2024 | H26 | LIG | 113 | -17.559 | -31.576 | -9.090  | 1.00 | 0.00 |
| ATOM | 2025 | O3  | LIG | 113 | -14.610 | -30.576 | -8.058  | 1.00 | 0.00 |
| ATOM | 2026 | O4  | LIG | 113 | -16.779 | -29.294 | -8.183  | 1.00 | 0.00 |
| ATOM | 2027 | C1  | LIG | 113 | -13.022 | -26.480 | -16.329 | 1.00 | 0.00 |
| ATOM | 2028 | H1  | LIG | 113 | -12.587 | -27.421 | -16.689 | 1.00 | 0.00 |
| ATOM | 2029 | H2  | LIG | 113 | -14.037 | -26.436 | -16.745 | 1.00 | 0.00 |
| ATOM | 2030 | C2  | LIG | 113 | -12.203 | -25.304 | -16.873 | 1.00 | 0.00 |
| ATOM | 2031 | H3  | LIG | 113 | -11.188 | -25.347 | -16.458 | 1.00 | 0.00 |
| ATOM | 2032 | H4  | LIG | 113 | -12.637 | -24.362 | -16.513 | 1.00 | 0.00 |
| ATOM | 2033 | C3  | LIG | 113 | -13.104 | -26.513 | -14.799 | 1.00 | 0.00 |
| ATOM | 2034 | H5  | LIG | 113 | -13.541 | -25.572 | -14.440 | 1.00 | 0.00 |
| ATOM | 2035 | H6  | LIG | 113 | -12.088 | -26.554 | -14.384 | 1.00 | 0.00 |
| ATOM | 2036 | C4  | LIG | 113 | -12.120 | -25.268 | -18.404 | 1.00 | 0.00 |
| ATOM | 2037 | H7  | LIG | 113 | -13.136 | -25.223 | -18.820 | 1.00 | 0.00 |



|      |      |     |     |     |         |         |         |      |      |
|------|------|-----|-----|-----|---------|---------|---------|------|------|
| ATOM | 2038 | H8  | LIG | 113 | -11.687 | -26.210 | -18.764 | 1.00 | 0.00 |
| ATOM | 2039 | C5  | LIG | 113 | -13.920 | -27.690 | -14.255 | 1.00 | 0.00 |
| ATOM | 2040 | H9  | LIG | 113 | -14.935 | -27.651 | -14.671 | 1.00 | 0.00 |
| ATOM | 2041 | H10 | LIG | 113 | -13.481 | -28.631 | -14.610 | 1.00 | 0.00 |
| ATOM | 2042 | C6  | LIG | 113 | -11.301 | -24.093 | -18.948 | 1.00 | 0.00 |
| ATOM | 2043 | H11 | LIG | 113 | -10.286 | -24.137 | -18.532 | 1.00 | 0.00 |
| ATOM | 2044 | H12 | LIG | 113 | -11.735 | -23.151 | -18.588 | 1.00 | 0.00 |
| ATOM | 2045 | C7  | LIG | 113 | -14.002 | -27.718 | -12.725 | 1.00 | 0.00 |
| ATOM | 2046 | H13 | LIG | 113 | -12.987 | -27.755 | -12.309 | 1.00 | 0.00 |
| ATOM | 2047 | H14 | LIG | 113 | -14.446 | -26.779 | -12.370 | 1.00 | 0.00 |
| ATOM | 2048 | C8  | LIG | 113 | -11.218 | -24.057 | -20.478 | 1.00 | 0.00 |
| ATOM | 2049 | H15 | LIG | 113 | -10.783 | -24.998 | -20.840 | 1.00 | 0.00 |
| ATOM | 2050 | H16 | LIG | 113 | -12.233 | -24.013 | -20.895 | 1.00 | 0.00 |
| ATOM | 2051 | C9  | LIG | 113 | -14.817 | -28.904 | -12.192 | 1.00 | 0.00 |
| ATOM | 2052 | H17 | LIG | 113 | -14.369 | -29.847 | -12.523 | 1.00 | 0.00 |
| ATOM | 2053 | H18 | LIG | 113 | -15.834 | -28.872 | -12.596 | 1.00 | 0.00 |
| ATOM | 2054 | C10 | LIG | 113 | -10.398 | -22.882 | -21.024 | 1.00 | 0.00 |
| ATOM | 2055 | H19 | LIG | 113 | -9.385  | -22.926 | -20.607 | 1.00 | 0.00 |
| ATOM | 2056 | H20 | LIG | 113 | -10.834 | -21.941 | -20.664 | 1.00 | 0.00 |
| ATOM | 2057 | C11 | LIG | 113 | -14.888 | -28.903 | -10.677 | 1.00 | 0.00 |
| ATOM | 2058 | H21 | LIG | 113 | -13.896 | -28.986 | -10.226 | 1.00 | 0.00 |
| ATOM | 2059 | H22 | LIG | 113 | -15.391 | -28.011 | -10.295 | 1.00 | 0.00 |

|      |      |     |     |     |         |         |         |      |      |
|------|------|-----|-----|-----|---------|---------|---------|------|------|
| ATOM | 2060 | C12 | LIG | 113 | -10.321 | -22.856 | -22.553 | 1.00 | 0.00 |
| ATOM | 2061 | H23 | LIG | 113 | -11.319 | -22.778 | -22.998 | 1.00 | 0.00 |
| ATOM | 2062 | H24 | LIG | 113 | -9.732  | -22.006 | -22.909 | 1.00 | 0.00 |
| ATOM | 2063 | H25 | LIG | 113 | -9.858  | -23.767 | -22.942 | 1.00 | 0.00 |
| TER  |      |     |     |     |         |         |         |      |      |
| END  |      |     |     |     |         |         |         |      |      |

**Table P:** The number of atoms present in the system of HA-Sum

|      |    |     |     |   |       |        |        |      |      |
|------|----|-----|-----|---|-------|--------|--------|------|------|
| ATOM | 1  | N   | PRO | 1 | 3.730 | -5.775 | 11.978 | 1.00 | 0.00 |
| ATOM | 2  | H2  | PRO | 1 | 4.217 | -4.893 | 12.052 | 1.00 | 0.00 |
| ATOM | 3  | H3  | PRO | 1 | 4.182 | -6.627 | 12.276 | 1.00 | 0.00 |
| ATOM | 4  | CD  | PRO | 1 | 2.464 | -5.730 | 12.772 | 1.00 | 0.00 |
| ATOM | 5  | HD2 | PRO | 1 | 2.398 | -4.714 | 13.163 | 1.00 | 0.00 |
| ATOM | 6  | HD3 | PRO | 1 | 2.609 | -6.427 | 13.596 | 1.00 | 0.00 |
| ATOM | 7  | CG  | PRO | 1 | 1.260 | -6.103 | 11.894 | 1.00 | 0.00 |
| ATOM | 8  | HG2 | PRO | 1 | 0.558 | -5.269 | 11.869 | 1.00 | 0.00 |
| ATOM | 9  | HG3 | PRO | 1 | 0.766 | -6.980 | 12.311 | 1.00 | 0.00 |
| ATOM | 10 | CB  | PRO | 1 | 1.820 | -6.401 | 10.507 | 1.00 | 0.00 |
| ATOM | 11 | HB2 | PRO | 1 | 1.269 | -5.933 | 9.691  | 1.00 | 0.00 |
| ATOM | 12 | HB3 | PRO | 1 | 1.840 | -7.480 | 10.359 | 1.00 | 0.00 |
| ATOM | 13 | CA  | PRO | 1 | 3.259 | -5.849 | 10.551 | 1.00 | 0.00 |
| ATOM | 14 | HA  | PRO | 1 | 3.852 | -6.609 | 10.043 | 1.00 | 0.00 |

|      |    |     |     |   |        |        |        |      |      |
|------|----|-----|-----|---|--------|--------|--------|------|------|
| ATOM | 15 | C   | PRO | 1 | 3.399  | -4.508 | 9.806  | 1.00 | 0.00 |
| ATOM | 16 | O   | PRO | 1 | 2.427  | -3.903 | 9.355  | 1.00 | 0.00 |
| ATOM | 17 | N   | TYR | 2 | 4.643  | -4.073 | 9.667  | 1.00 | 0.00 |
| ATOM | 18 | H   | TYR | 2 | 5.405  | -4.623 | 10.036 | 1.00 | 0.00 |
| ATOM | 19 | CA  | TYR | 2 | 4.957  | -2.821 | 9.001  | 1.00 | 0.00 |
| ATOM | 20 | HA  | TYR | 2 | 4.081  | -2.176 | 8.938  | 1.00 | 0.00 |
| ATOM | 21 | CB  | TYR | 2 | 6.028  | -2.112 | 9.833  | 1.00 | 0.00 |
| ATOM | 22 | HB2 | TYR | 2 | 6.361  | -1.218 | 9.304  | 1.00 | 0.00 |
| ATOM | 23 | HB3 | TYR | 2 | 5.534  | -1.822 | 10.760 | 1.00 | 0.00 |
| ATOM | 24 | CG  | TYR | 2 | 7.231  | -2.990 | 10.152 | 1.00 | 0.00 |
| ATOM | 25 | CD1 | TYR | 2 | 7.218  | -3.816 | 11.296 | 1.00 | 0.00 |
| ATOM | 26 | HD1 | TYR | 2 | 6.352  | -3.813 | 11.957 | 1.00 | 0.00 |
| ATOM | 27 | CE1 | TYR | 2 | 8.321  | -4.643 | 11.584 | 1.00 | 0.00 |
| ATOM | 28 | HE1 | TYR | 2 | 8.337  | -5.233 | 12.500 | 1.00 | 0.00 |
| ATOM | 29 | CZ  | TYR | 2 | 9.444  | -4.631 | 10.734 | 1.00 | 0.00 |
| ATOM | 30 | OH  | TYR | 2 | 10.501 | -5.451 | 10.968 | 1.00 | 0.00 |
| ATOM | 31 | HH  | TYR | 2 | 10.382 | -6.003 | 11.743 | 1.00 | 0.00 |
| ATOM | 32 | CE2 | TYR | 2 | 9.436  | -3.835 | 9.579  | 1.00 | 0.00 |
| ATOM | 33 | HE2 | TYR | 2 | 10.297 | -3.856 | 8.910  | 1.00 | 0.00 |
| ATOM | 34 | CD2 | TYR | 2 | 8.334  | -3.015 | 9.280  | 1.00 | 0.00 |
| ATOM | 35 | HD2 | TYR | 2 | 8.338  | -2.404 | 8.377  | 1.00 | 0.00 |
| ATOM | 36 | C   | TYR | 2 | 5.476  | -3.063 | 7.592  | 1.00 | 0.00 |

|      |    |     |     |   |        |        |       |      |      |
|------|----|-----|-----|---|--------|--------|-------|------|------|
| ATOM | 37 | O   | TYR | 2 | 5.267  | -2.214 | 6.743 | 1.00 | 0.00 |
| ATOM | 38 | N   | GLY | 3 | 6.063  | -4.246 | 7.357 | 1.00 | 0.00 |
| ATOM | 39 | H   | GLY | 3 | 6.103  | -4.919 | 8.108 | 1.00 | 0.00 |
| ATOM | 40 | CA  | GLY | 3 | 6.641  | -4.606 | 6.083 | 1.00 | 0.00 |
| ATOM | 41 | HA2 | GLY | 3 | 6.980  | -5.641 | 6.124 | 1.00 | 0.00 |
| ATOM | 42 | HA3 | GLY | 3 | 5.884  | -4.502 | 5.305 | 1.00 | 0.00 |
| ATOM | 43 | C   | GLY | 3 | 7.827  | -3.709 | 5.744 | 1.00 | 0.00 |
| ATOM | 44 | O   | GLY | 3 | 7.776  | -2.484 | 5.748 | 1.00 | 0.00 |
| ATOM | 45 | N   | ARG | 4 | 8.967  | -4.337 | 5.494 | 1.00 | 0.00 |
| ATOM | 46 | H   | ARG | 4 | 9.039  | -5.332 | 5.646 | 1.00 | 0.00 |
| ATOM | 47 | CA  | ARG | 4 | 10.166 | -3.611 | 5.087 | 1.00 | 0.00 |
| ATOM | 48 | HA  | ARG | 4 | 9.995  | -2.535 | 5.141 | 1.00 | 0.00 |
| ATOM | 49 | CB  | ARG | 4 | 11.322 | -3.971 | 6.026 | 1.00 | 0.00 |
| ATOM | 50 | HB2 | ARG | 4 | 10.933 | -4.072 | 7.039 | 1.00 | 0.00 |
| ATOM | 51 | HB3 | ARG | 4 | 11.753 | -4.919 | 5.705 | 1.00 | 0.00 |
| ATOM | 52 | CG  | ARG | 4 | 12.406 | -2.883 | 6.001 | 1.00 | 0.00 |
| ATOM | 53 | HG2 | ARG | 4 | 12.246 | -2.245 | 5.131 | 1.00 | 0.00 |
| ATOM | 54 | HG3 | ARG | 4 | 12.326 | -2.285 | 6.908 | 1.00 | 0.00 |
| ATOM | 55 | CD  | ARG | 4 | 13.800 | -3.509 | 5.924 | 1.00 | 0.00 |
| ATOM | 56 | HD2 | ARG | 4 | 13.957 | -4.153 | 6.788 | 1.00 | 0.00 |
| ATOM | 57 | HD3 | ARG | 4 | 13.883 | -4.099 | 5.011 | 1.00 | 0.00 |
| ATOM | 58 | NE  | ARG | 4 | 14.844 | -2.474 | 5.912 | 1.00 | 0.00 |

|      |    |      |     |   |        |        |       |      |      |
|------|----|------|-----|---|--------|--------|-------|------|------|
| ATOM | 59 | HE   | ARG | 4 | 14.527 | -1.526 | 5.766 | 1.00 | 0.00 |
| ATOM | 60 | CZ   | ARG | 4 | 16.137 | -2.689 | 6.060 | 1.00 | 0.00 |
| ATOM | 61 | NH1  | ARG | 4 | 16.593 | -3.900 | 6.252 | 1.00 | 0.00 |
| ATOM | 62 | HH11 | ARG | 4 | 15.951 | -4.678 | 6.287 | 1.00 | 0.00 |
| ATOM | 63 | HH12 | ARG | 4 | 17.586 | -4.050 | 6.363 | 1.00 | 0.00 |
| ATOM | 64 | NH2  | ARG | 4 | 16.985 | -1.697 | 6.032 | 1.00 | 0.00 |
| ATOM | 65 | HH21 | ARG | 4 | 16.650 | -0.754 | 5.895 | 1.00 | 0.00 |
| ATOM | 66 | HH22 | ARG | 4 | 17.972 | -1.877 | 6.146 | 1.00 | 0.00 |
| ATOM | 67 | C    | ARG | 4 | 10.522 | -3.876 | 3.626 | 1.00 | 0.00 |
| ATOM | 68 | O    | ARG | 4 | 11.606 | -3.507 | 3.195 | 1.00 | 0.00 |
| ATOM | 69 | N    | GLY | 5 | 9.681  | -4.652 | 2.939 | 1.00 | 0.00 |
| ATOM | 70 | H    | GLY | 5 | 8.841  | -4.990 | 3.386 | 1.00 | 0.00 |
| ATOM | 71 | CA   | GLY | 5 | 9.926  | -5.030 | 1.569 | 1.00 | 0.00 |
| ATOM | 72 | HA2  | GLY | 5 | 9.100  | -5.643 | 1.208 | 1.00 | 0.00 |
| ATOM | 73 | HA3  | GLY | 5 | 10.007 | -4.133 | 0.954 | 1.00 | 0.00 |
| ATOM | 74 | C    | GLY | 5 | 11.212 | -5.821 | 1.458 | 1.00 | 0.00 |
| ATOM | 75 | O    | GLY | 5 | 11.956 | -5.637 | 0.510 | 1.00 | 0.00 |
| ATOM | 76 | N    | ARG | 6 | 11.498 | -6.664 | 2.458 | 1.00 | 0.00 |
| ATOM | 77 | H    | ARG | 6 | 10.886 | -6.678 | 3.261 | 1.00 | 0.00 |
| ATOM | 78 | CA   | ARG | 6 | 12.690 | -7.504 | 2.481 | 1.00 | 0.00 |
| ATOM | 79 | HA   | ARG | 6 | 13.551 | -6.928 | 2.142 | 1.00 | 0.00 |
| ATOM | 80 | CB   | ARG | 6 | 12.968 | -8.012 | 3.898 | 1.00 | 0.00 |

|      |     |          |   |        |         |        |      |      |
|------|-----|----------|---|--------|---------|--------|------|------|
| ATOM | 81  | HB2 ARG  | 6 | 13.732 | -8.787  | 3.845  | 1.00 | 0.00 |
| ATOM | 82  | HB3 ARG  | 6 | 13.336 | -7.180  | 4.499  | 1.00 | 0.00 |
| ATOM | 83  | CG ARG   | 6 | 11.694 | -8.590  | 4.545  | 1.00 | 0.00 |
| ATOM | 84  | HG2 ARG  | 6 | 11.244 | -7.823  | 5.176  | 1.00 | 0.00 |
| ATOM | 85  | HG3 ARG  | 6 | 10.995 | -8.865  | 3.755  | 1.00 | 0.00 |
| ATOM | 86  | CD ARG   | 6 | 12.018 | -9.821  | 5.391  | 1.00 | 0.00 |
| ATOM | 87  | HD2 ARG  | 6 | 13.096 | -9.885  | 5.540  | 1.00 | 0.00 |
| ATOM | 88  | HD3 ARG  | 6 | 11.522 | -9.737  | 6.358  | 1.00 | 0.00 |
| ATOM | 89  | NE ARG   | 6 | 11.559 | -11.054 | 4.731  | 1.00 | 0.00 |
| ATOM | 90  | HE ARG   | 6 | 11.307 | -10.969 | 3.756  | 1.00 | 0.00 |
| ATOM | 91  | CZ ARG   | 6 | 11.477 | -12.241 | 5.302  | 1.00 | 0.00 |
| ATOM | 92  | NH1 ARG  | 6 | 11.792 | -12.396 | 6.564  | 1.00 | 0.00 |
| ATOM | 93  | HH11 ARG | 6 | 12.100 | -11.601 | 7.105  | 1.00 | 0.00 |
| ATOM | 94  | HH12 ARG | 6 | 11.725 | -13.309 | 6.989  | 1.00 | 0.00 |
| ATOM | 95  | NH2 ARG  | 6 | 11.058 | -13.273 | 4.624  | 1.00 | 0.00 |
| ATOM | 96  | HH21 ARG | 6 | 10.794 | -13.163 | 3.655  | 1.00 | 0.00 |
| ATOM | 97  | HH22 ARG | 6 | 10.999 | -14.176 | 5.070  | 1.00 | 0.00 |
| ATOM | 98  | C ARG    | 6 | 12.589 | -8.671  | 1.512  | 1.00 | 0.00 |
| ATOM | 99  | O ARG    | 6 | 12.733 | -9.813  | 1.946  | 1.00 | 0.00 |
| ATOM | 100 | N THR    | 7 | 12.251 | -8.403  | 0.267  | 1.00 | 0.00 |
| ATOM | 101 | H THR    | 7 | 12.118 | -7.434  | 0.013  | 1.00 | 0.00 |
| ATOM | 102 | CA THR   | 7 | 11.996 | -9.417  | -0.735 | 1.00 | 0.00 |

|      |     |      |     |   |        |         |        |      |      |
|------|-----|------|-----|---|--------|---------|--------|------|------|
| ATOM | 103 | HA   | THR | 7 | 12.660 | -10.260 | -0.543 | 1.00 | 0.00 |
| ATOM | 104 | CB   | THR | 7 | 10.537 | -9.899  | -0.608 | 1.00 | 0.00 |
| ATOM | 105 | HB   | THR | 7 | 10.270 | -10.440 | -1.516 | 1.00 | 0.00 |
| ATOM | 106 | CG2  | THR | 7 | 10.356 | -10.819 | 0.608  | 1.00 | 0.00 |
| ATOM | 107 | HG21 | THR | 7 | 10.622 | -10.278 | 1.516  | 1.00 | 0.00 |
| ATOM | 108 | HG22 | THR | 7 | 9.317  | -11.141 | 0.668  | 1.00 | 0.00 |
| ATOM | 109 | HG23 | THR | 7 | 11.001 | -11.691 | 0.503  | 1.00 | 0.00 |
| ATOM | 110 | OG1  | THR | 7 | 9.664  | -8.800  | -0.393 | 1.00 | 0.00 |
| ATOM | 111 | HG1  | THR | 7 | 8.762  | -9.118  | -0.317 | 1.00 | 0.00 |
| ATOM | 112 | C    | THR | 7 | 12.295 | -8.861  | -2.112 | 1.00 | 0.00 |
| ATOM | 113 | O    | THR | 7 | 12.761 | -7.733  | -2.231 | 1.00 | 0.00 |
| ATOM | 114 | N    | GLU | 8 | 12.052 | -9.665  | -3.137 | 1.00 | 0.00 |
| ATOM | 115 | H    | GLU | 8 | 11.756 | -10.614 | -2.964 | 1.00 | 0.00 |
| ATOM | 116 | CA   | GLU | 8 | 12.274 | -9.252  | -4.516 | 1.00 | 0.00 |
| ATOM | 117 | HA   | GLU | 8 | 12.860 | -8.333  | -4.546 | 1.00 | 0.00 |
| ATOM | 118 | CB   | GLU | 8 | 13.045 | -10.349 | -5.261 | 1.00 | 0.00 |
| ATOM | 119 | HB2  | GLU | 8 | 12.590 | -11.314 | -5.039 | 1.00 | 0.00 |
| ATOM | 120 | HB3  | GLU | 8 | 12.985 | -10.158 | -6.333 | 1.00 | 0.00 |
| ATOM | 121 | CG   | GLU | 8 | 14.514 | -10.365 | -4.827 | 1.00 | 0.00 |
| ATOM | 122 | HG2  | GLU | 8 | 14.642 | -9.817  | -3.894 | 1.00 | 0.00 |
| ATOM | 123 | HG3  | GLU | 8 | 14.789 | -11.409 | -4.676 | 1.00 | 0.00 |
| ATOM | 124 | CD   | GLU | 8 | 15.411 | -9.753  | -5.904 | 1.00 | 0.00 |

|      |     |     |     |    |        |         |        |      |      |
|------|-----|-----|-----|----|--------|---------|--------|------|------|
| ATOM | 125 | OE1 | GLU | 8  | 15.717 | -10.484 | -6.873 | 1.00 | 0.00 |
| ATOM | 126 | OE2 | GLU | 8  | 15.743 | -8.555  | -5.768 | 1.00 | 0.00 |
| ATOM | 127 | C   | GLU | 8  | 10.952 | -8.923  | -5.208 | 1.00 | 0.00 |
| ATOM | 128 | O   | GLU | 8  | 9.873  | -8.921  | -4.596 | 1.00 | 0.00 |
| ATOM | 129 | N   | SER | 9  | 11.042 | -8.605  | -6.495 | 1.00 | 0.00 |
| ATOM | 130 | H   | SER | 9  | 11.957 | -8.490  | -6.907 | 1.00 | 0.00 |
| ATOM | 131 | CA  | SER | 9  | 9.879  | -8.336  | -7.319 | 1.00 | 0.00 |
| ATOM | 132 | HA  | SER | 9  | 9.257  | -7.585  | -6.832 | 1.00 | 0.00 |
| ATOM | 133 | CB  | SER | 9  | 10.283 | -7.813  | -8.706 | 1.00 | 0.00 |
| ATOM | 134 | HB2 | SER | 9  | 9.672  | -8.324  | -9.450 | 1.00 | 0.00 |
| ATOM | 135 | HB3 | SER | 9  | 10.074 | -6.743  | -8.737 | 1.00 | 0.00 |
| ATOM | 136 | OG  | SER | 9  | 11.650 | -8.033  | -8.989 | 1.00 | 0.00 |
| ATOM | 137 | HG  | SER | 9  | 11.855 | -7.691  | -9.863 | 1.00 | 0.00 |
| ATOM | 138 | C   | SER | 9  | 8.985  | -9.574  | -7.458 | 1.00 | 0.00 |
| ATOM | 139 | O   | SER | 9  | 9.337  | -10.693 | -7.089 | 1.00 | 0.00 |
| ATOM | 140 | N   | GLY | 10 | 7.791  | -9.381  | -8.015 | 1.00 | 0.00 |
| ATOM | 141 | H   | GLY | 10 | 7.503  | -8.451  | -8.287 | 1.00 | 0.00 |
| ATOM | 142 | CA  | GLY | 10 | 6.869  | -10.487 | -8.250 | 1.00 | 0.00 |
| ATOM | 143 | HA2 | GLY | 10 | 7.002  | -10.851 | -9.269 | 1.00 | 0.00 |
| ATOM | 144 | HA3 | GLY | 10 | 7.089  | -11.289 | -7.546 | 1.00 | 0.00 |
| ATOM | 145 | C   | GLY | 10 | 5.441  | -10.054 | -8.068 | 1.00 | 0.00 |
| ATOM | 146 | O   | GLY | 10 | 4.851  | -9.488  | -8.978 | 1.00 | 0.00 |



|      |     |     |     |    |       |         |        |      |      |
|------|-----|-----|-----|----|-------|---------|--------|------|------|
| ATOM | 147 | N   | CYX | 11 | 4.936 | -10.157 | -6.838 | 1.00 | 0.00 |
| ATOM | 148 | H   | CYX | 11 | 5.463 | -10.623 | -6.113 | 1.00 | 0.00 |
| ATOM | 149 | CA  | CYX | 11 | 3.611 | -9.684  | -6.524 | 1.00 | 0.00 |
| ATOM | 150 | HA  | CYX | 11 | 2.893 | -10.093 | -7.235 | 1.00 | 0.00 |
| ATOM | 151 | CB  | CYX | 11 | 3.213 | -10.121 | -5.124 | 1.00 | 0.00 |
| ATOM | 152 | HB2 | CYX | 11 | 3.831 | -9.601  | -4.392 | 1.00 | 0.00 |
| ATOM | 153 | HB3 | CYX | 11 | 2.164 | -9.879  | -4.952 | 1.00 | 0.00 |
| ATOM | 154 | SG  | CYX | 11 | 3.329 | -11.879 | -4.771 | 1.00 | 0.00 |
| ATOM | 155 | C   | CYX | 11 | 3.511 | -8.160  | -6.669 | 1.00 | 0.00 |
| ATOM | 156 | O   | CYX | 11 | 2.424 | -7.599  | -6.639 | 1.00 | 0.00 |
| ATOM | 157 | N   | TYR | 12 | 4.654 | -7.493  | -6.760 | 1.00 | 0.00 |
| ATOM | 158 | H   | TYR | 12 | 5.506 | -8.030  | -6.684 | 1.00 | 0.00 |
| ATOM | 159 | CA  | TYR | 12 | 4.759 | -6.075  | -6.979 | 1.00 | 0.00 |
| ATOM | 160 | HA  | TYR | 12 | 4.013 | -5.520  | -6.410 | 1.00 | 0.00 |
| ATOM | 161 | CB  | TYR | 12 | 6.142 | -5.670  | -6.492 | 1.00 | 0.00 |
| ATOM | 162 | HB2 | TYR | 12 | 6.219 | -6.000  | -5.456 | 1.00 | 0.00 |
| ATOM | 163 | HB3 | TYR | 12 | 6.879 | -6.198  | -7.097 | 1.00 | 0.00 |
| ATOM | 164 | CG  | TYR | 12 | 6.401 | -4.188  | -6.567 | 1.00 | 0.00 |
| ATOM | 165 | CD1 | TYR | 12 | 5.579 | -3.296  | -5.859 | 1.00 | 0.00 |
| ATOM | 166 | HD1 | TYR | 12 | 4.753 | -3.682  | -5.263 | 1.00 | 0.00 |
| ATOM | 167 | CE1 | TYR | 12 | 5.817 | -1.912  | -5.917 | 1.00 | 0.00 |
| ATOM | 168 | HE1 | TYR | 12 | 5.152 | -1.221  | -5.400 | 1.00 | 0.00 |

|      |     |     |     |    |       |        |         |      |      |
|------|-----|-----|-----|----|-------|--------|---------|------|------|
| ATOM | 169 | CZ  | TYR | 12 | 6.867 | -1.416 | -6.709  | 1.00 | 0.00 |
| ATOM | 170 | OH  | TYR | 12 | 7.132 | -0.082 | -6.725  | 1.00 | 0.00 |
| ATOM | 171 | HH  | TYR | 12 | 6.543 | 0.425  | -6.162  | 1.00 | 0.00 |
| ATOM | 172 | CE2 | TYR | 12 | 7.693 | -2.311 | -7.422  | 1.00 | 0.00 |
| ATOM | 173 | HE2 | TYR | 12 | 8.518 | -1.928 | -8.024  | 1.00 | 0.00 |
| ATOM | 174 | CD2 | TYR | 12 | 7.453 | -3.696 | -7.357  | 1.00 | 0.00 |
| ATOM | 175 | HD2 | TYR | 12 | 8.083 | -4.385 | -7.920  | 1.00 | 0.00 |
| ATOM | 176 | C   | TYR | 12 | 4.626 | -5.709 | -8.452  | 1.00 | 0.00 |
| ATOM | 177 | O   | TYR | 12 | 3.963 | -4.747 | -8.790  | 1.00 | 0.00 |
| ATOM | 178 | N   | GLN | 13 | 5.241 | -6.499 | -9.325  | 1.00 | 0.00 |
| ATOM | 179 | H   | GLN | 13 | 5.785 | -7.289 | -9.010  | 1.00 | 0.00 |
| ATOM | 180 | CA  | GLN | 13 | 5.170 | -6.238 | -10.747 | 1.00 | 0.00 |
| ATOM | 181 | HA  | GLN | 13 | 5.540 | -5.236 | -10.968 | 1.00 | 0.00 |
| ATOM | 182 | CB  | GLN | 13 | 6.035 | -7.253 | -11.493 | 1.00 | 0.00 |
| ATOM | 183 | HB2 | GLN | 13 | 7.085 | -7.042 | -11.290 | 1.00 | 0.00 |
| ATOM | 184 | HB3 | GLN | 13 | 5.791 | -8.255 | -11.141 | 1.00 | 0.00 |
| ATOM | 185 | CG  | GLN | 13 | 5.780 | -7.166 | -13.003 | 1.00 | 0.00 |
| ATOM | 186 | HG2 | GLN | 13 | 4.744 | -7.418 | -13.229 | 1.00 | 0.00 |
| ATOM | 187 | HG3 | GLN | 13 | 5.976 | -6.136 | -13.302 | 1.00 | 0.00 |
| ATOM | 188 | CD  | GLN | 13 | 6.686 | -8.082 | -13.801 | 1.00 | 0.00 |
| ATOM | 189 | OE1 | GLN | 13 | 7.657 | -8.642 | -13.313 | 1.00 | 0.00 |
| ATOM | 190 | NE2 | GLN | 13 | 6.364 | -8.295 | -15.056 | 1.00 | 0.00 |

|      |     |      |     |    |        |         |         |      |      |
|------|-----|------|-----|----|--------|---------|---------|------|------|
| ATOM | 191 | HE21 | GLN | 13 | 6.939  | -8.898  | -15.627 | 1.00 | 0.00 |
| ATOM | 192 | HE22 | GLN | 13 | 5.543  | -7.854  | -15.446 | 1.00 | 0.00 |
| ATOM | 193 | C    | GLN | 13 | 3.723  | -6.332  | -11.214 | 1.00 | 0.00 |
| ATOM | 194 | O    | GLN | 13 | 3.254  | -5.542  | -11.996 | 1.00 | 0.00 |
| ATOM | 195 | N    | GLN | 14 | 2.996  | -7.342  | -10.754 | 1.00 | 0.00 |
| ATOM | 196 | H    | GLN | 14 | 3.421  | -8.057  | -10.182 | 1.00 | 0.00 |
| ATOM | 197 | CA   | GLN | 14 | 1.595  | -7.487  | -11.112 | 1.00 | 0.00 |
| ATOM | 198 | HA   | GLN | 14 | 1.478  | -7.399  | -12.193 | 1.00 | 0.00 |
| ATOM | 199 | CB   | GLN | 14 | 1.071  | -8.856  | -10.673 | 1.00 | 0.00 |
| ATOM | 200 | HB2  | GLN | 14 | -0.018 | -8.818  | -10.652 | 1.00 | 0.00 |
| ATOM | 201 | HB3  | GLN | 14 | 1.394  | -9.599  | -11.402 | 1.00 | 0.00 |
| ATOM | 202 | CG   | GLN | 14 | 1.593  | -9.238  | -9.293  | 1.00 | 0.00 |
| ATOM | 203 | HG2  | GLN | 14 | 2.516  | -9.797  | -9.446  | 1.00 | 0.00 |
| ATOM | 204 | HG3  | GLN | 14 | 1.810  | -8.324  | -8.740  | 1.00 | 0.00 |
| ATOM | 205 | CD   | GLN | 14 | 0.655  | -10.075 | -8.484  | 1.00 | 0.00 |
| ATOM | 206 | OE1  | GLN | 14 | -0.102 | -10.832 | -9.037  | 1.00 | 0.00 |
| ATOM | 207 | NE2  | GLN | 14 | 0.689  | -9.926  | -7.167  | 1.00 | 0.00 |
| ATOM | 208 | HE21 | GLN | 14 | 0.072  | -10.472 | -6.584  | 1.00 | 0.00 |
| ATOM | 209 | HE22 | GLN | 14 | 1.332  | -9.266  | -6.753  | 1.00 | 0.00 |
| ATOM | 210 | C    | GLN | 14 | 0.740  | -6.377  | -10.511 | 1.00 | 0.00 |
| ATOM | 211 | O    | GLN | 14 | -0.279 | -6.020  | -11.071 | 1.00 | 0.00 |
| ATOM | 212 | N    | MET | 15 | 1.134  | -5.869  | -9.349  | 1.00 | 0.00 |

|      |     |     |     |    |        |        |         |      |      |
|------|-----|-----|-----|----|--------|--------|---------|------|------|
| ATOM | 213 | H   | MET | 15 | 1.975  | -6.246 | -8.937  | 1.00 | 0.00 |
| ATOM | 214 | CA  | MET | 15 | 0.456  | -4.804 | -8.662  | 1.00 | 0.00 |
| ATOM | 215 | HA  | MET | 15 | -0.517 | -5.154 | -8.320  | 1.00 | 0.00 |
| ATOM | 216 | CB  | MET | 15 | 1.252  | -4.334 | -7.461  | 1.00 | 0.00 |
| ATOM | 217 | HB2 | MET | 15 | 2.181  | -4.902 | -7.416  | 1.00 | 0.00 |
| ATOM | 218 | HB3 | MET | 15 | 1.481  | -3.275 | -7.589  | 1.00 | 0.00 |
| ATOM | 219 | CG  | MET | 15 | 0.483  | -4.530 | -6.187  | 1.00 | 0.00 |
| ATOM | 220 | HG2 | MET | 15 | -0.526 | -4.135 | -6.304  | 1.00 | 0.00 |
| ATOM | 221 | HG3 | MET | 15 | 0.432  | -5.592 | -5.950  | 1.00 | 0.00 |
| ATOM | 222 | SD  | MET | 15 | 1.303  | -3.665 | -4.847  | 1.00 | 0.00 |
| ATOM | 223 | CE  | MET | 15 | 2.142  | -5.043 | -4.114  | 1.00 | 0.00 |
| ATOM | 224 | HE1 | MET | 15 | 2.816  | -5.489 | -4.845  | 1.00 | 0.00 |
| ATOM | 225 | HE2 | MET | 15 | 2.716  | -4.703 | -3.252  | 1.00 | 0.00 |
| ATOM | 226 | HE3 | MET | 15 | 1.411  | -5.785 | -3.794  | 1.00 | 0.00 |
| ATOM | 227 | C   | MET | 15 | 0.282  | -3.615 | -9.562  | 1.00 | 0.00 |
| ATOM | 228 | O   | MET | 15 | -0.820 | -3.118 | -9.614  | 1.00 | 0.00 |
| ATOM | 229 | N   | GLU | 16 | 1.334  | -3.141 | -10.221 | 1.00 | 0.00 |
| ATOM | 230 | H   | GLU | 16 | 2.245  | -3.543 | -10.051 | 1.00 | 0.00 |
| ATOM | 231 | CA  | GLU | 16 | 1.236  | -2.015 | -11.146 | 1.00 | 0.00 |
| ATOM | 232 | HA  | GLU | 16 | 0.981  | -1.103 | -10.607 | 1.00 | 0.00 |
| ATOM | 233 | CB  | GLU | 16 | 2.588  | -1.809 | -11.846 | 1.00 | 0.00 |
| ATOM | 234 | HB2 | GLU | 16 | 2.689  | -0.751 | -12.092 | 1.00 | 0.00 |

|      |     |     |     |    |        |        |         |      |      |
|------|-----|-----|-----|----|--------|--------|---------|------|------|
| ATOM | 235 | HB3 | GLU | 16 | 3.380  | -2.098 | -11.155 | 1.00 | 0.00 |
| ATOM | 236 | CG  | GLU | 16 | 2.699  | -2.645 | -13.130 | 1.00 | 0.00 |
| ATOM | 237 | HG2 | GLU | 16 | 2.325  | -3.629 | -12.850 | 1.00 | 0.00 |
| ATOM | 238 | HG3 | GLU | 16 | 2.080  | -2.236 | -13.929 | 1.00 | 0.00 |
| ATOM | 239 | CD  | GLU | 16 | 4.141  | -2.768 | -13.616 | 1.00 | 0.00 |
| ATOM | 240 | OE1 | GLU | 16 | 4.984  | -3.335 | -12.879 | 1.00 | 0.00 |
| ATOM | 241 | OE2 | GLU | 16 | 4.441  | -2.222 | -14.698 | 1.00 | 0.00 |
| ATOM | 242 | C   | GLU | 16 | 0.120  | -2.233 | -12.177 | 1.00 | 0.00 |
| ATOM | 243 | O   | GLU | 16 | -0.563 | -1.288 | -12.562 | 1.00 | 0.00 |
| ATOM | 244 | N   | GLU | 17 | -0.094 | -3.498 | -12.555 | 1.00 | 0.00 |
| ATOM | 245 | H   | GLU | 17 | 0.486  | -4.231 | -12.174 | 1.00 | 0.00 |
| ATOM | 246 | CA  | GLU | 17 | -1.107 | -3.857 | -13.515 | 1.00 | 0.00 |
| ATOM | 247 | HA  | GLU | 17 | -1.110 | -3.139 | -14.336 | 1.00 | 0.00 |
| ATOM | 248 | CB  | GLU | 17 | -0.830 | -5.254 | -14.086 | 1.00 | 0.00 |
| ATOM | 249 | HB2 | GLU | 17 | 0.205  | -5.530 | -13.884 | 1.00 | 0.00 |
| ATOM | 250 | HB3 | GLU | 17 | -1.497 | -5.977 | -13.618 | 1.00 | 0.00 |
| ATOM | 251 | CG  | GLU | 17 | -1.069 | -5.245 | -15.599 | 1.00 | 0.00 |
| ATOM | 252 | HG2 | GLU | 17 | -1.659 | -6.121 | -15.867 | 1.00 | 0.00 |
| ATOM | 253 | HG3 | GLU | 17 | -1.622 | -4.342 | -15.859 | 1.00 | 0.00 |
| ATOM | 254 | CD  | GLU | 17 | 0.256  | -5.269 | -16.365 | 1.00 | 0.00 |
| ATOM | 255 | OE1 | GLU | 17 | 1.144  | -4.465 | -16.030 | 1.00 | 0.00 |
| ATOM | 256 | OE2 | GLU | 17 | 0.367  | -6.105 | -17.289 | 1.00 | 0.00 |

|      |     |     |     |    |        |        |         |      |      |
|------|-----|-----|-----|----|--------|--------|---------|------|------|
| ATOM | 257 | C   | GLU | 17 | -2.481 | -3.827 | -12.854 | 1.00 | 0.00 |
| ATOM | 258 | O   | GLU | 17 | -3.494 | -3.588 | -13.511 | 1.00 | 0.00 |
| ATOM | 259 | N   | ALA | 18 | -2.541 | -4.088 | -11.550 | 1.00 | 0.00 |
| ATOM | 260 | H   | ALA | 18 | -1.699 | -4.402 | -11.089 | 1.00 | 0.00 |
| ATOM | 261 | CA  | ALA | 18 | -3.753 | -4.026 | -10.785 | 1.00 | 0.00 |
| ATOM | 262 | HA  | ALA | 18 | -4.597 | -3.673 | -11.378 | 1.00 | 0.00 |
| ATOM | 263 | CB  | ALA | 18 | -4.055 | -5.438 | -10.298 | 1.00 | 0.00 |
| ATOM | 264 | HB1 | ALA | 18 | -3.222 | -5.800 | -9.696  | 1.00 | 0.00 |
| ATOM | 265 | HB2 | ALA | 18 | -4.963 | -5.428 | -9.695  | 1.00 | 0.00 |
| ATOM | 266 | HB3 | ALA | 18 | -4.196 | -6.096 | -11.156 | 1.00 | 0.00 |
| ATOM | 267 | C   | ALA | 18 | -3.584 | -3.015 | -9.676  | 1.00 | 0.00 |
| ATOM | 268 | O   | ALA | 18 | -3.490 | -3.415 | -8.529  | 1.00 | 0.00 |
| ATOM | 269 | N   | GLU | 19 | -3.465 | -1.726 | -9.969  | 1.00 | 0.00 |
| ATOM | 270 | H   | GLU | 19 | -3.410 | -1.470 | -10.945 | 1.00 | 0.00 |
| ATOM | 271 | CA  | GLU | 19 | -3.294 | -0.681 | -8.972  | 1.00 | 0.00 |
| ATOM | 272 | HA  | GLU | 19 | -2.499 | -0.953 | -8.279  | 1.00 | 0.00 |
| ATOM | 273 | CB  | GLU | 19 | -2.918 | 0.638  | -9.653  | 1.00 | 0.00 |
| ATOM | 274 | HB2 | GLU | 19 | -1.871 | 0.589  | -9.954  | 1.00 | 0.00 |
| ATOM | 275 | HB3 | GLU | 19 | -3.543 | 0.764  | -10.537 | 1.00 | 0.00 |
| ATOM | 276 | CG  | GLU | 19 | -3.121 | 1.820  | -8.716  | 1.00 | 0.00 |
| ATOM | 277 | HG2 | GLU | 19 | -3.311 | 1.546  | -7.679  | 1.00 | 0.00 |
| ATOM | 278 | HG3 | GLU | 19 | -2.185 | 2.376  | -8.780  | 1.00 | 0.00 |

|      |     |     |     |    |        |        |        |      |      |
|------|-----|-----|-----|----|--------|--------|--------|------|------|
| ATOM | 279 | CD  | GLU | 19 | -4.293 | 2.711  | -9.242 | 1.00 | 0.00 |
| ATOM | 280 | OE1 | GLU | 19 | -5.275 | 2.322  | -9.919 | 1.00 | 0.00 |
| ATOM | 281 | OE2 | GLU | 19 | -4.316 | 3.889  | -8.868 | 1.00 | 0.00 |
| ATOM | 282 | C   | GLU | 19 | -4.593 | -0.620 | -8.119 | 1.00 | 0.00 |
| ATOM | 283 | O   | GLU | 19 | -5.435 | 0.271  | -8.102 | 1.00 | 0.00 |
| ATOM | 284 | N   | MET | 20 | -4.817 | -1.576 | -7.263 | 1.00 | 0.00 |
| ATOM | 285 | H   | MET | 20 | -4.148 | -2.327 | -7.170 | 1.00 | 0.00 |
| ATOM | 286 | CA  | MET | 20 | -6.009 | -1.617 | -6.453 | 1.00 | 0.00 |
| ATOM | 287 | HA  | MET | 20 | -6.789 | -0.986 | -6.881 | 1.00 | 0.00 |
| ATOM | 288 | CB  | MET | 20 | -6.510 | -3.041 | -6.408 | 1.00 | 0.00 |
| ATOM | 289 | HB2 | MET | 20 | -7.580 | -3.003 | -6.204 | 1.00 | 0.00 |
| ATOM | 290 | HB3 | MET | 20 | -6.343 | -3.476 | -7.394 | 1.00 | 0.00 |
| ATOM | 291 | CG  | MET | 20 | -5.830 | -3.886 | -5.365 | 1.00 | 0.00 |
| ATOM | 292 | HG2 | MET | 20 | -4.844 | -3.450 | -5.201 | 1.00 | 0.00 |
| ATOM | 293 | HG3 | MET | 20 | -6.422 | -3.798 | -4.454 | 1.00 | 0.00 |
| ATOM | 294 | SD  | MET | 20 | -5.649 | -5.593 | -5.777 | 1.00 | 0.00 |
| ATOM | 295 | CE  | MET | 20 | -4.380 | -5.511 | -6.998 | 1.00 | 0.00 |
| ATOM | 296 | HE1 | MET | 20 | -3.483 | -5.071 | -6.562 | 1.00 | 0.00 |
| ATOM | 297 | HE2 | MET | 20 | -4.154 | -6.515 | -7.357 | 1.00 | 0.00 |
| ATOM | 298 | HE3 | MET | 20 | -4.717 | -4.895 | -7.833 | 1.00 | 0.00 |
| ATOM | 299 | C   | MET | 20 | -5.662 | -1.109 | -5.082 | 1.00 | 0.00 |
| ATOM | 300 | O   | MET | 20 | -6.556 | -0.774 | -4.306 | 1.00 | 0.00 |

|      |     |      |     |    |        |        |        |      |      |
|------|-----|------|-----|----|--------|--------|--------|------|------|
| ATOM | 301 | N    | LEU | 21 | -4.362 | -1.089 | -4.765 | 1.00 | 0.00 |
| ATOM | 302 | H    | LEU | 21 | -3.690 | -1.470 | -5.416 | 1.00 | 0.00 |
| ATOM | 303 | CA   | LEU | 21 | -3.890 | -0.648 | -3.476 | 1.00 | 0.00 |
| ATOM | 304 | HA   | LEU | 21 | -4.641 | -0.845 | -2.712 | 1.00 | 0.00 |
| ATOM | 305 | CB   | LEU | 21 | -2.620 | -1.400 | -3.115 | 1.00 | 0.00 |
| ATOM | 306 | HB2  | LEU | 21 | -1.953 | -1.044 | -3.901 | 1.00 | 0.00 |
| ATOM | 307 | HB3  | LEU | 21 | -2.235 | -1.089 | -2.144 | 1.00 | 0.00 |
| ATOM | 308 | CG   | LEU | 21 | -2.700 | -2.939 | -3.167 | 1.00 | 0.00 |
| ATOM | 309 | HG   | LEU | 21 | -1.932 | -3.327 | -2.498 | 1.00 | 0.00 |
| ATOM | 310 | CD1  | LEU | 21 | -4.052 | -3.493 | -2.761 | 1.00 | 0.00 |
| ATOM | 311 | HD11 | LEU | 21 | -4.820 | -3.105 | -3.431 | 1.00 | 0.00 |
| ATOM | 312 | HD12 | LEU | 21 | -4.032 | -4.581 | -2.823 | 1.00 | 0.00 |
| ATOM | 313 | HD13 | LEU | 21 | -4.277 | -3.191 | -1.739 | 1.00 | 0.00 |
| ATOM | 314 | CD2  | LEU | 21 | -2.250 | -3.428 | -4.531 | 1.00 | 0.00 |
| ATOM | 315 | HD21 | LEU | 21 | -1.222 | -3.113 | -4.710 | 1.00 | 0.00 |
| ATOM | 316 | HD22 | LEU | 21 | -2.307 | -4.516 | -4.565 | 1.00 | 0.00 |
| ATOM | 317 | HD23 | LEU | 21 | -2.897 | -3.006 | -5.301 | 1.00 | 0.00 |
| ATOM | 318 | C    | LEU | 21 | -3.726 | 0.860  | -3.480 | 1.00 | 0.00 |
| ATOM | 319 | O    | LEU | 21 | -3.154 | 1.428  | -2.563 | 1.00 | 0.00 |
| ATOM | 320 | N    | ASN | 22 | -4.300 | 1.503  | -4.495 | 1.00 | 0.00 |
| ATOM | 321 | H    | ASN | 22 | -4.797 | 0.977  | -5.200 | 1.00 | 0.00 |
| ATOM | 322 | CA   | ASN | 22 | -4.271 | 2.935  | -4.608 | 1.00 | 0.00 |



|      |     |      |     |    |         |       |        |      |      |
|------|-----|------|-----|----|---------|-------|--------|------|------|
| ATOM | 323 | HA   | ASN | 22 | -3.480  | 3.343 | -3.979 | 1.00 | 0.00 |
| ATOM | 324 | CB   | ASN | 22 | -4.005  | 3.339 | -6.041 | 1.00 | 0.00 |
| ATOM | 325 | HB2  | ASN | 22 | -3.059  | 3.078 | -6.515 | 1.00 | 0.00 |
| ATOM | 326 | HB3  | ASN | 22 | -4.809  | 2.760 | -6.494 | 1.00 | 0.00 |
| ATOM | 327 | CG   | ASN | 22 | -4.278  | 4.822 | -6.281 | 1.00 | 0.00 |
| ATOM | 328 | OD1  | ASN | 22 | -5.365  | 5.257 | -6.645 | 1.00 | 0.00 |
| ATOM | 329 | ND2  | ASN | 22 | -3.370  | 5.635 | -5.791 | 1.00 | 0.00 |
| ATOM | 330 | HD21 | ASN | 22 | -3.475  | 6.633 | -5.907 | 1.00 | 0.00 |
| ATOM | 331 | HD22 | ASN | 22 | -2.571  | 5.259 | -5.302 | 1.00 | 0.00 |
| ATOM | 332 | C    | ASN | 22 | -5.616  | 3.497 | -4.214 | 1.00 | 0.00 |
| ATOM | 333 | O    | ASN | 22 | -5.670  | 4.514 | -3.551 | 1.00 | 0.00 |
| ATOM | 334 | N    | HIE | 23 | -6.714  | 2.820 | -4.562 | 1.00 | 0.00 |
| ATOM | 335 | H    | HIE | 23 | -6.614  | 1.966 | -5.091 | 1.00 | 0.00 |
| ATOM | 336 | CA   | HIE | 23 | -8.050  | 3.282 | -4.249 | 1.00 | 0.00 |
| ATOM | 337 | HA   | HIE | 23 | -8.156  | 4.336 | -4.508 | 1.00 | 0.00 |
| ATOM | 338 | CB   | HIE | 23 | -9.066  | 2.479 | -5.052 | 1.00 | 0.00 |
| ATOM | 339 | HB2  | HIE | 23 | -8.893  | 1.410 | -4.934 | 1.00 | 0.00 |
| ATOM | 340 | HB3  | HIE | 23 | -10.073 | 2.724 | -4.714 | 1.00 | 0.00 |
| ATOM | 341 | CG   | HIE | 23 | -9.029  | 2.760 | -6.527 | 1.00 | 0.00 |
| ATOM | 342 | ND1  | HIE | 23 | -9.988  | 3.475 | -7.218 | 1.00 | 0.00 |
| ATOM | 343 | CE1  | HIE | 23 | -9.619  | 3.509 | -8.519 | 1.00 | 0.00 |
| ATOM | 344 | HE1  | HIE | 23 | -10.240 | 4.032 | -9.246 | 1.00 | 0.00 |

|      |     |         |    |        |        |        |      |      |
|------|-----|---------|----|--------|--------|--------|------|------|
| ATOM | 345 | NE2 HIE | 23 | -8.455 | 2.830  | -8.669 | 1.00 | 0.00 |
| ATOM | 346 | HE2 HIE | 23 | -7.942 | 2.686  | -9.528 | 1.00 | 0.00 |
| ATOM | 347 | CD2 HIE | 23 | -8.073 | 2.356  | -7.427 | 1.00 | 0.00 |
| ATOM | 348 | HD2 HIE | 23 | -7.154 | 1.779  | -7.323 | 1.00 | 0.00 |
| ATOM | 349 | C HIE   | 23 | -8.292 | 3.139  | -2.760 | 1.00 | 0.00 |
| ATOM | 350 | O HIE   | 23 | -8.549 | 4.146  | -2.105 | 1.00 | 0.00 |
| ATOM | 351 | N CYX   | 24 | -8.224 | 1.901  | -2.246 | 1.00 | 0.00 |
| ATOM | 352 | H CYX   | 24 | -8.094 | 1.104  | -2.853 | 1.00 | 0.00 |
| ATOM | 353 | CA CYX  | 24 | -8.367 | 1.664  | -0.815 | 1.00 | 0.00 |
| ATOM | 354 | HA CYX  | 24 | -9.366 | 1.962  | -0.497 | 1.00 | 0.00 |
| ATOM | 355 | CB CYX  | 24 | -8.165 | 0.190  | -0.474 | 1.00 | 0.00 |
| ATOM | 356 | HB2 CYX | 24 | -7.755 | -0.330 | -1.340 | 1.00 | 0.00 |
| ATOM | 357 | HB3 CYX | 24 | -7.473 | 0.102  | 0.363  | 1.00 | 0.00 |
| ATOM | 358 | SG CYX  | 24 | -9.664 | -0.679 | -0.012 | 1.00 | 0.00 |
| ATOM | 359 | C CYX   | 24 | -7.358 | 2.507  | -0.047 | 1.00 | 0.00 |
| ATOM | 360 | O CYX   | 24 | -7.682 | 2.940  | 1.037  | 1.00 | 0.00 |
| ATOM | 361 | N GLY   | 25 | -6.215 | 2.834  | -0.653 | 1.00 | 0.00 |
| ATOM | 362 | H GLY   | 25 | -6.044 | 2.461  | -1.576 | 1.00 | 0.00 |
| ATOM | 363 | CA GLY  | 25 | -5.216 | 3.686  | -0.066 | 1.00 | 0.00 |
| ATOM | 364 | HA2 GLY | 25 | -5.026 | 3.357  | 0.955  | 1.00 | 0.00 |
| ATOM | 365 | HA3 GLY | 25 | -4.298 | 3.608  | -0.649 | 1.00 | 0.00 |
| ATOM | 366 | C GLY   | 25 | -5.661 | 5.127  | -0.042 | 1.00 | 0.00 |

|      |     |     |     |    |         |        |        |      |      |
|------|-----|-----|-----|----|---------|--------|--------|------|------|
| ATOM | 367 | O   | GLY | 25 | -5.625  | 5.740  | 1.008  | 1.00 | 0.00 |
| ATOM | 368 | N   | MET | 26 | -6.200  | 5.645  | -1.137 | 1.00 | 0.00 |
| ATOM | 369 | H   | MET | 26 | -6.331  | 5.019  | -1.919 | 1.00 | 0.00 |
| ATOM | 370 | CA  | MET | 26 | -6.645  | 7.009  | -1.272 | 1.00 | 0.00 |
| ATOM | 371 | HA  | MET | 26 | -5.794  | 7.684  | -1.172 | 1.00 | 0.00 |
| ATOM | 372 | CB  | MET | 26 | -7.290  | 7.237  | -2.636 | 1.00 | 0.00 |
| ATOM | 373 | HB2 | MET | 26 | -7.222  | 6.316  | -3.214 | 1.00 | 0.00 |
| ATOM | 374 | HB3 | MET | 26 | -8.338  | 7.497  | -2.489 | 1.00 | 0.00 |
| ATOM | 375 | CG  | MET | 26 | -6.591  | 8.359  | -3.388 | 1.00 | 0.00 |
| ATOM | 376 | HG2 | MET | 26 | -7.201  | 9.262  | -3.341 | 1.00 | 0.00 |
| ATOM | 377 | HG3 | MET | 26 | -5.621  | 8.552  | -2.930 | 1.00 | 0.00 |
| ATOM | 378 | SD  | MET | 26 | -6.350  | 7.899  | -5.110 | 1.00 | 0.00 |
| ATOM | 379 | CE  | MET | 26 | -5.014  | 9.034  | -5.540 | 1.00 | 0.00 |
| ATOM | 380 | HE1 | MET | 26 | -4.152  | 8.840  | -4.902 | 1.00 | 0.00 |
| ATOM | 381 | HE2 | MET | 26 | -4.733  | 8.888  | -6.583 | 1.00 | 0.00 |
| ATOM | 382 | HE3 | MET | 26 | -5.348  | 10.062 | -5.396 | 1.00 | 0.00 |
| ATOM | 383 | C   | MET | 26 | -7.691  | 7.314  | -0.245 | 1.00 | 0.00 |
| ATOM | 384 | O   | MET | 26 | -7.610  | 8.357  | 0.359  | 1.00 | 0.00 |
| ATOM | 385 | N   | TYR | 27 | -8.699  | 6.466  | -0.079 | 1.00 | 0.00 |
| ATOM | 386 | H   | TYR | 27 | -8.751  | 5.661  | -0.686 | 1.00 | 0.00 |
| ATOM | 387 | CA  | TYR | 27 | -9.724  | 6.630  | 0.940  | 1.00 | 0.00 |
| ATOM | 388 | HA  | TYR | 27 | -10.444 | 7.402  | 0.667  | 1.00 | 0.00 |

|      |     |     |     |    |         |       |       |      |      |
|------|-----|-----|-----|----|---------|-------|-------|------|------|
| ATOM | 389 | CB  | TYR | 27 | -10.454 | 5.295 | 1.039 | 1.00 | 0.00 |
| ATOM | 390 | HB2 | TYR | 27 | -10.889 | 5.104 | 0.058 | 1.00 | 0.00 |
| ATOM | 391 | HB3 | TYR | 27 | -9.711  | 4.529 | 1.262 | 1.00 | 0.00 |
| ATOM | 392 | CG  | TYR | 27 | -11.542 | 5.262 | 2.087 | 1.00 | 0.00 |
| ATOM | 393 | CD1 | TYR | 27 | -12.691 | 6.053 | 1.920 | 1.00 | 0.00 |
| ATOM | 394 | HD1 | TYR | 27 | -12.796 | 6.685 | 1.037 | 1.00 | 0.00 |
| ATOM | 395 | CE1 | TYR | 27 | -13.707 | 6.030 | 2.893 | 1.00 | 0.00 |
| ATOM | 396 | HE1 | TYR | 27 | -14.610 | 6.624 | 2.753 | 1.00 | 0.00 |
| ATOM | 397 | CZ  | TYR | 27 | -13.572 | 5.207 | 4.031 | 1.00 | 0.00 |
| ATOM | 398 | OH  | TYR | 27 | -14.536 | 5.193 | 4.990 | 1.00 | 0.00 |
| ATOM | 399 | HH  | TYR | 27 | -15.268 | 5.782 | 4.794 | 1.00 | 0.00 |
| ATOM | 400 | CE2 | TYR | 27 | -12.417 | 4.423 | 4.199 | 1.00 | 0.00 |
| ATOM | 401 | HE2 | TYR | 27 | -12.312 | 3.792 | 5.081 | 1.00 | 0.00 |
| ATOM | 402 | CD2 | TYR | 27 | -11.398 | 4.453 | 3.230 | 1.00 | 0.00 |
| ATOM | 403 | HD2 | TYR | 27 | -10.499 | 3.851 | 3.365 | 1.00 | 0.00 |
| ATOM | 404 | C   | TYR | 27 | -9.147  | 6.979 | 2.308 | 1.00 | 0.00 |
| ATOM | 405 | O   | TYR | 27 | -9.687  | 7.817 | 3.022 | 1.00 | 0.00 |
| ATOM | 406 | N   | LEU | 28 | -7.991  | 6.402 | 2.617 | 1.00 | 0.00 |
| ATOM | 407 | H   | LEU | 28 | -7.590  | 5.740 | 1.968 | 1.00 | 0.00 |
| ATOM | 408 | CA  | LEU | 28 | -7.311  | 6.631 | 3.869 | 1.00 | 0.00 |
| ATOM | 409 | HA  | LEU | 28 | -8.033  | 6.928 | 4.630 | 1.00 | 0.00 |
| ATOM | 410 | CB  | LEU | 28 | -6.603  | 5.368 | 4.336 | 1.00 | 0.00 |

|      |     |          |    |        |       |       |      |      |
|------|-----|----------|----|--------|-------|-------|------|------|
| ATOM | 411 | HB2 LEU  | 28 | -5.650 | 5.435 | 3.810 | 1.00 | 0.00 |
| ATOM | 412 | HB3 LEU  | 28 | -6.428 | 5.410 | 5.411 | 1.00 | 0.00 |
| ATOM | 413 | CG LEU   | 28 | -7.294 | 4.039 | 3.980 | 1.00 | 0.00 |
| ATOM | 414 | HG LEU   | 28 | -7.994 | 4.222 | 3.164 | 1.00 | 0.00 |
| ATOM | 415 | CD1 LEU  | 28 | -6.287 | 2.982 | 3.556 | 1.00 | 0.00 |
| ATOM | 416 | HD11 LEU | 28 | -5.587 | 2.799 | 4.371 | 1.00 | 0.00 |
| ATOM | 417 | HD12 LEU | 28 | -6.810 | 2.058 | 3.312 | 1.00 | 0.00 |
| ATOM | 418 | HD13 LEU | 28 | -5.740 | 3.331 | 2.680 | 1.00 | 0.00 |
| ATOM | 419 | CD2 LEU  | 28 | -8.157 | 3.566 | 5.112 | 1.00 | 0.00 |
| ATOM | 420 | HD21 LEU | 28 | -8.922 | 4.314 | 5.323 | 1.00 | 0.00 |
| ATOM | 421 | HD22 LEU | 28 | -8.635 | 2.626 | 4.837 | 1.00 | 0.00 |
| ATOM | 422 | HD23 LEU | 28 | -7.542 | 3.415 | 5.999 | 1.00 | 0.00 |
| ATOM | 423 | C LEU    | 28 | -6.334 | 7.784 | 3.711 | 1.00 | 0.00 |
| ATOM | 424 | O LEU    | 28 | -6.118 | 8.518 | 4.658 | 1.00 | 0.00 |
| ATOM | 425 | N MET    | 29 | -5.844 | 8.042 | 2.502 | 1.00 | 0.00 |
| ATOM | 426 | H MET    | 29 | -6.036 | 7.335 | 1.807 | 1.00 | 0.00 |
| ATOM | 427 | CA MET   | 29 | -5.006 | 9.157 | 2.129 | 1.00 | 0.00 |
| ATOM | 428 | HA MET   | 29 | -4.364 | 9.444 | 2.962 | 1.00 | 0.00 |
| ATOM | 429 | CB MET   | 29 | -4.125 | 8.759 | 0.950 | 1.00 | 0.00 |
| ATOM | 430 | HB2 MET  | 29 | -4.327 | 7.718 | 0.698 | 1.00 | 0.00 |
| ATOM | 431 | HB3 MET  | 29 | -4.373 | 9.393 | 0.098 | 1.00 | 0.00 |
| ATOM | 432 | CG MET   | 29 | -2.654 | 8.921 | 1.290 | 1.00 | 0.00 |

|      |     |         |    |         |        |        |      |      |
|------|-----|---------|----|---------|--------|--------|------|------|
| ATOM | 433 | HG2 MET | 29 | -2.479  | 8.517  | 2.286  | 1.00 | 0.00 |
| ATOM | 434 | HG3 MET | 29 | -2.064  | 8.363  | 0.563  | 1.00 | 0.00 |
| ATOM | 435 | SD MET  | 29 | -2.154  | 10.645 | 1.257  | 1.00 | 0.00 |
| ATOM | 436 | CE MET  | 29 | -2.159  | 10.893 | -0.528 | 1.00 | 0.00 |
| ATOM | 437 | HE1 MET | 29 | -3.158  | 10.704 | -0.919 | 1.00 | 0.00 |
| ATOM | 438 | HE2 MET | 29 | -1.870  | 11.920 | -0.754 | 1.00 | 0.00 |
| ATOM | 439 | HE3 MET | 29 | -1.451  | 10.207 | -0.993 | 1.00 | 0.00 |
| ATOM | 440 | C MET   | 29 | -5.794  | 10.428 | 1.830  | 1.00 | 0.00 |
| ATOM | 441 | O MET   | 29 | -5.260  | 11.419 | 1.345  | 1.00 | 0.00 |
| ATOM | 442 | N LYS   | 30 | -7.102  | 10.411 | 2.057  | 1.00 | 0.00 |
| ATOM | 443 | H LYS   | 30 | -7.525  | 9.552  | 2.376  | 1.00 | 0.00 |
| ATOM | 444 | CA LYS  | 30 | -7.962  | 11.541 | 1.791  | 1.00 | 0.00 |
| ATOM | 445 | HA LYS  | 30 | -7.620  | 12.077 | 0.905  | 1.00 | 0.00 |
| ATOM | 446 | CB LYS  | 30 | -9.392  | 11.047 | 1.543  | 1.00 | 0.00 |
| ATOM | 447 | HB2 LYS | 30 | -9.461  | 9.993  | 1.809  | 1.00 | 0.00 |
| ATOM | 448 | HB3 LYS | 30 | -10.084 | 11.623 | 2.157  | 1.00 | 0.00 |
| ATOM | 449 | CG LYS  | 30 | -9.753  | 11.224 | 0.063  | 1.00 | 0.00 |
| ATOM | 450 | HG2 LYS | 30 | -8.842  | 11.181 | -0.535 | 1.00 | 0.00 |
| ATOM | 451 | HG3 LYS | 30 | -10.424 | 10.421 | -0.240 | 1.00 | 0.00 |
| ATOM | 452 | CD LYS  | 30 | -10.443 | 12.575 | -0.155 | 1.00 | 0.00 |
| ATOM | 453 | HD2 LYS | 30 | -11.351 | 12.399 | -0.731 | 1.00 | 0.00 |
| ATOM | 454 | HD3 LYS | 30 | -10.706 | 12.980 | 0.822  | 1.00 | 0.00 |

|      |     |      |     |    |         |        |        |      |      |
|------|-----|------|-----|----|---------|--------|--------|------|------|
| ATOM | 455 | CE   | LYS | 30 | -9.558  | 13.571 | -0.895 | 1.00 | 0.00 |
| ATOM | 456 | HE2  | LYS | 30 | -9.982  | 14.570 | -0.787 | 1.00 | 0.00 |
| ATOM | 457 | HE3  | LYS | 30 | -8.560  | 13.551 | -0.457 | 1.00 | 0.00 |
| ATOM | 458 | NZ   | LYS | 30 | -9.472  | 13.224 | -2.337 | 1.00 | 0.00 |
| ATOM | 459 | HZ1  | LYS | 30 | -10.396 | 13.243 | -2.744 | 1.00 | 0.00 |
| ATOM | 460 | HZ2  | LYS | 30 | -8.882  | 13.894 | -2.810 | 1.00 | 0.00 |
| ATOM | 461 | HZ3  | LYS | 30 | -9.079  | 12.300 | -2.438 | 1.00 | 0.00 |
| ATOM | 462 | C    | LYS | 30 | -7.863  | 12.508 | 2.948  | 1.00 | 0.00 |
| ATOM | 463 | O    | LYS | 30 | -8.168  | 13.672 | 2.737  | 1.00 | 0.00 |
| ATOM | 464 | N    | ASN | 31 | -7.473  | 12.008 | 4.124  | 1.00 | 0.00 |
| ATOM | 465 | H    | ASN | 31 | -7.345  | 11.011 | 4.216  | 1.00 | 0.00 |
| ATOM | 466 | CA   | ASN | 31 | -7.236  | 12.845 | 5.290  | 1.00 | 0.00 |
| ATOM | 467 | HA   | ASN | 31 | -7.651  | 13.842 | 5.142  | 1.00 | 0.00 |
| ATOM | 468 | CB   | ASN | 31 | -7.926  | 12.201 | 6.495  | 1.00 | 0.00 |
| ATOM | 469 | HB2  | ASN | 31 | -7.906  | 11.114 | 6.430  | 1.00 | 0.00 |
| ATOM | 470 | HB3  | ASN | 31 | -7.390  | 12.522 | 7.388  | 1.00 | 0.00 |
| ATOM | 471 | CG   | ASN | 31 | -9.362  | 12.651 | 6.607  | 1.00 | 0.00 |
| ATOM | 472 | OD1  | ASN | 31 | -9.765  | 13.367 | 7.498  | 1.00 | 0.00 |
| ATOM | 473 | ND2  | ASN | 31 | -10.165 | 12.263 | 5.645  | 1.00 | 0.00 |
| ATOM | 474 | HD21 | ASN | 31 | -11.138 | 12.533 | 5.664  | 1.00 | 0.00 |
| ATOM | 475 | HD22 | ASN | 31 | -9.806  | 11.697 | 4.889  | 1.00 | 0.00 |
| ATOM | 476 | C    | ASN | 31 | -5.745  | 12.998 | 5.579  | 1.00 | 0.00 |

|      |     |      |     |    |        |        |       |      |      |
|------|-----|------|-----|----|--------|--------|-------|------|------|
| ATOM | 477 | O    | ASN | 31 | -5.381 | 13.747 | 6.474 | 1.00 | 0.00 |
| ATOM | 478 | N    | LEU | 32 | -4.920 | 12.245 | 4.850 | 1.00 | 0.00 |
| ATOM | 479 | H    | LEU | 32 | -5.292 | 11.567 | 4.201 | 1.00 | 0.00 |
| ATOM | 480 | CA   | LEU | 32 | -3.499 | 12.313 | 5.021 | 1.00 | 0.00 |
| ATOM | 481 | HA   | LEU | 32 | -3.262 | 12.553 | 6.057 | 1.00 | 0.00 |
| ATOM | 482 | CB   | LEU | 32 | -2.856 | 10.977 | 4.671 | 1.00 | 0.00 |
| ATOM | 483 | HB2  | LEU | 32 | -3.199 | 10.744 | 3.662 | 1.00 | 0.00 |
| ATOM | 484 | HB3  | LEU | 32 | -1.770 | 11.077 | 4.670 | 1.00 | 0.00 |
| ATOM | 485 | CG   | LEU | 32 | -3.262 | 9.855  | 5.617 | 1.00 | 0.00 |
| ATOM | 486 | HG   | LEU | 32 | -4.331 | 9.927  | 5.814 | 1.00 | 0.00 |
| ATOM | 487 | CD1  | LEU | 32 | -2.951 | 8.503  | 5.000 | 1.00 | 0.00 |
| ATOM | 488 | HD11 | LEU | 32 | -1.881 | 8.431  | 4.802 | 1.00 | 0.00 |
| ATOM | 489 | HD12 | LEU | 32 | -3.247 | 7.712  | 5.688 | 1.00 | 0.00 |
| ATOM | 490 | HD13 | LEU | 32 | -3.501 | 8.395  | 4.065 | 1.00 | 0.00 |
| ATOM | 491 | CD2  | LEU | 32 | -2.557 | 10.015 | 6.951 | 1.00 | 0.00 |
| ATOM | 492 | HD21 | LEU | 32 | -2.830 | 10.973 | 7.394 | 1.00 | 0.00 |
| ATOM | 493 | HD22 | LEU | 32 | -2.855 | 9.208  | 7.619 | 1.00 | 0.00 |
| ATOM | 494 | HD23 | LEU | 32 | -1.478 | 9.981  | 6.798 | 1.00 | 0.00 |
| ATOM | 495 | C    | LEU | 32 | -2.939 | 13.438 | 4.194 | 1.00 | 0.00 |
| ATOM | 496 | O    | LEU | 32 | -1.878 | 13.868 | 4.598 | 1.00 | 0.00 |
| ATOM | 497 | N    | GLY | 33 | -3.652 | 13.902 | 3.141 | 1.00 | 0.00 |
| ATOM | 498 | H    | GLY | 33 | -4.536 | 13.448 | 2.961 | 1.00 | 0.00 |



|      |     |     |     |    |        |        |        |      |      |
|------|-----|-----|-----|----|--------|--------|--------|------|------|
| ATOM | 499 | CA  | GLY | 33 | -3.244 | 14.989 | 2.263  | 1.00 | 0.00 |
| ATOM | 500 | HA2 | GLY | 33 | -3.767 | 14.889 | 1.311  | 1.00 | 0.00 |
| ATOM | 501 | HA3 | GLY | 33 | -3.514 | 15.938 | 2.727  | 1.00 | 0.00 |
| ATOM | 502 | C   | GLY | 33 | -1.741 | 14.973 | 2.007  | 1.00 | 0.00 |
| ATOM | 503 | O   | GLY | 33 | -0.961 | 15.655 | 2.663  | 1.00 | 0.00 |
| ATOM | 504 | N   | GLU | 34 | -1.335 | 14.228 | 0.987  | 1.00 | 0.00 |
| ATOM | 505 | H   | GLU | 34 | -1.992 | 13.690 | 0.441  | 1.00 | 0.00 |
| ATOM | 506 | CA  | GLU | 34 | 0.081  | 14.107 | 0.677  | 1.00 | 0.00 |
| ATOM | 507 | HA  | GLU | 34 | 0.659  | 14.108 | 1.601  | 1.00 | 0.00 |
| ATOM | 508 | CB  | GLU | 34 | 0.366  | 12.807 | -0.076 | 1.00 | 0.00 |
| ATOM | 509 | HB2 | GLU | 34 | 0.059  | 11.967 | 0.546  | 1.00 | 0.00 |
| ATOM | 510 | HB3 | GLU | 34 | -0.212 | 12.804 | -1.001 | 1.00 | 0.00 |
| ATOM | 511 | CG  | GLU | 34 | 1.855  | 12.680 | -0.405 | 1.00 | 0.00 |
| ATOM | 512 | HG2 | GLU | 34 | 2.000  | 11.681 | -0.815 | 1.00 | 0.00 |
| ATOM | 513 | HG3 | GLU | 34 | 2.131  | 13.423 | -1.154 | 1.00 | 0.00 |
| ATOM | 514 | CD  | GLU | 34 | 2.734  | 12.855 | 0.834  | 1.00 | 0.00 |
| ATOM | 515 | OE1 | GLU | 34 | 2.250  | 12.600 | 1.954  | 1.00 | 0.00 |
| ATOM | 516 | OE2 | GLU | 34 | 3.892  | 13.283 | 0.669  | 1.00 | 0.00 |
| ATOM | 517 | C   | GLU | 34 | 0.558  | 15.316 | -0.120 | 1.00 | 0.00 |
| ATOM | 518 | O   | GLU | 34 | 0.773  | 15.242 | -1.332 | 1.00 | 0.00 |
| ATOM | 519 | N   | ARG | 35 | 0.567  | 16.487 | 0.513  | 1.00 | 0.00 |
| ATOM | 520 | H   | ARG | 35 | 0.235  | 16.537 | 1.465  | 1.00 | 0.00 |

|      |     |      |     |    |        |        |        |      |      |
|------|-----|------|-----|----|--------|--------|--------|------|------|
| ATOM | 521 | CA   | ARG | 35 | 1.007  | 17.712 | -0.126 | 1.00 | 0.00 |
| ATOM | 522 | HA   | ARG | 35 | 2.028  | 17.595 | -0.489 | 1.00 | 0.00 |
| ATOM | 523 | CB   | ARG | 35 | 0.095  | 18.049 | -1.322 | 1.00 | 0.00 |
| ATOM | 524 | HB2  | ARG | 35 | -0.198 | 17.124 | -1.817 | 1.00 | 0.00 |
| ATOM | 525 | HB3  | ARG | 35 | -0.794 | 18.563 | -0.957 | 1.00 | 0.00 |
| ATOM | 526 | CG   | ARG | 35 | 0.827  | 18.945 | -2.314 | 1.00 | 0.00 |
| ATOM | 527 | HG2  | ARG | 35 | 0.210  | 19.822 | -2.515 | 1.00 | 0.00 |
| ATOM | 528 | HG3  | ARG | 35 | 1.771  | 19.260 | -1.870 | 1.00 | 0.00 |
| ATOM | 529 | CD   | ARG | 35 | 1.103  | 18.203 | -3.628 | 1.00 | 0.00 |
| ATOM | 530 | HD2  | ARG | 35 | 1.114  | 17.129 | -3.443 | 1.00 | 0.00 |
| ATOM | 531 | HD3  | ARG | 35 | 0.321  | 18.440 | -4.350 | 1.00 | 0.00 |
| ATOM | 532 | NE   | ARG | 35 | 2.402  | 18.596 | -4.196 | 1.00 | 0.00 |
| ATOM | 533 | HE   | ARG | 35 | 3.032  | 19.079 | -3.572 | 1.00 | 0.00 |
| ATOM | 534 | CZ   | ARG | 35 | 2.814  | 18.322 | -5.417 | 1.00 | 0.00 |
| ATOM | 535 | NH1  | ARG | 35 | 2.037  | 17.698 | -6.267 | 1.00 | 0.00 |
| ATOM | 536 | HH11 | ARG | 35 | 1.107  | 17.421 | -5.987 | 1.00 | 0.00 |
| ATOM | 537 | HH12 | ARG | 35 | 2.372  | 17.498 | -7.199 | 1.00 | 0.00 |
| ATOM | 538 | NH2  | ARG | 35 | 3.992  | 18.722 | -5.818 | 1.00 | 0.00 |
| ATOM | 539 | HH21 | ARG | 35 | 4.587  | 19.243 | -5.189 | 1.00 | 0.00 |
| ATOM | 540 | HH22 | ARG | 35 | 4.302  | 18.509 | -6.756 | 1.00 | 0.00 |
| ATOM | 541 | C    | ARG | 35 | 0.987  | 18.834 | 0.888  | 1.00 | 0.00 |
| ATOM | 542 | O    | ARG | 35 | 2.040  | 19.349 | 1.224  | 1.00 | 0.00 |

|      |     |     |     |    |        |        |       |      |      |
|------|-----|-----|-----|----|--------|--------|-------|------|------|
| ATOM | 543 | N   | SER | 36 | -0.218 | 19.265 | 1.272 | 1.00 | 0.00 |
| ATOM | 544 | H   | SER | 36 | -1.036 | 18.833 | 0.867 | 1.00 | 0.00 |
| ATOM | 545 | CA  | SER | 36 | -0.410 | 20.341 | 2.231 | 1.00 | 0.00 |
| ATOM | 546 | HA  | SER | 36 | 0.105  | 20.113 | 3.164 | 1.00 | 0.00 |
| ATOM | 547 | CB  | SER | 36 | 0.164  | 21.641 | 1.661 | 1.00 | 0.00 |
| ATOM | 548 | HB2 | SER | 36 | 1.242  | 21.529 | 1.546 | 1.00 | 0.00 |
| ATOM | 549 | HB3 | SER | 36 | -0.287 | 21.828 | 0.686 | 1.00 | 0.00 |
| ATOM | 550 | OG  | SER | 36 | -0.105 | 22.722 | 2.515 | 1.00 | 0.00 |
| ATOM | 551 | HG  | SER | 36 | 0.263  | 23.526 | 2.139 | 1.00 | 0.00 |
| ATOM | 552 | C   | SER | 36 | -1.894 | 20.509 | 2.523 | 1.00 | 0.00 |
| ATOM | 553 | O   | SER | 36 | -2.343 | 20.290 | 3.641 | 1.00 | 0.00 |
| ATOM | 554 | N   | GLN | 37 | -2.676 | 20.846 | 1.491 | 1.00 | 0.00 |
| ATOM | 555 | H   | GLN | 37 | -2.261 | 21.015 | 0.585 | 1.00 | 0.00 |
| ATOM | 556 | CA  | GLN | 37 | -4.112 | 21.044 | 1.640 | 1.00 | 0.00 |
| ATOM | 557 | HA  | GLN | 37 | -4.547 | 20.222 | 2.207 | 1.00 | 0.00 |
| ATOM | 558 | CB  | GLN | 37 | -4.382 | 22.350 | 2.388 | 1.00 | 0.00 |
| ATOM | 559 | HB2 | GLN | 37 | -3.658 | 22.464 | 3.195 | 1.00 | 0.00 |
| ATOM | 560 | HB3 | GLN | 37 | -4.291 | 23.190 | 1.698 | 1.00 | 0.00 |
| ATOM | 561 | CG  | GLN | 37 | -5.796 | 22.321 | 2.972 | 1.00 | 0.00 |
| ATOM | 562 | HG2 | GLN | 37 | -6.525 | 22.490 | 2.179 | 1.00 | 0.00 |
| ATOM | 563 | HG3 | GLN | 37 | -5.963 | 21.340 | 3.416 | 1.00 | 0.00 |
| ATOM | 564 | CD  | GLN | 37 | -5.992 | 23.380 | 4.045 | 1.00 | 0.00 |

|      |     |      |     |    |        |        |        |      |      |
|------|-----|------|-----|----|--------|--------|--------|------|------|
| ATOM | 565 | OE1  | GLN | 37 | -5.090 | 24.070 | 4.481  | 1.00 | 0.00 |
| ATOM | 566 | NE2  | GLN | 37 | -7.215 | 23.549 | 4.495  | 1.00 | 0.00 |
| ATOM | 567 | HE21 | GLN | 37 | -7.396 | 24.241 | 5.208  | 1.00 | 0.00 |
| ATOM | 568 | HE22 | GLN | 37 | -7.968 | 22.987 | 4.125  | 1.00 | 0.00 |
| ATOM | 569 | C    | GLN | 37 | -4.794 | 21.039 | 0.280  | 1.00 | 0.00 |
| ATOM | 570 | O    | GLN | 37 | -5.181 | 22.066 | -0.272 | 1.00 | 0.00 |
| ATOM | 571 | N    | VAL | 38 | -4.813 | 19.868 | -0.345 | 1.00 | 0.00 |
| ATOM | 572 | H    | VAL | 38 | -4.303 | 19.080 | 0.027  | 1.00 | 0.00 |
| ATOM | 573 | CA   | VAL | 38 | -5.469 | 19.718 | -1.636 | 1.00 | 0.00 |
| ATOM | 574 | HA   | VAL | 38 | -5.256 | 20.556 | -2.301 | 1.00 | 0.00 |
| ATOM | 575 | CB   | VAL | 38 | -5.005 | 18.427 | -2.313 | 1.00 | 0.00 |
| ATOM | 576 | HB   | VAL | 38 | -5.532 | 18.302 | -3.259 | 1.00 | 0.00 |
| ATOM | 577 | CG1  | VAL | 38 | -3.495 | 18.503 | -2.576 | 1.00 | 0.00 |
| ATOM | 578 | HG11 | VAL | 38 | -2.967 | 18.628 | -1.631 | 1.00 | 0.00 |
| ATOM | 579 | HG12 | VAL | 38 | -3.163 | 17.584 | -3.059 | 1.00 | 0.00 |
| ATOM | 580 | HG13 | VAL | 38 | -3.281 | 19.352 | -3.226 | 1.00 | 0.00 |
| ATOM | 581 | CG2  | VAL | 38 | -5.332 | 17.190 | -1.468 | 1.00 | 0.00 |
| ATOM | 582 | HG21 | VAL | 38 | -6.409 | 17.128 | -1.317 | 1.00 | 0.00 |
| ATOM | 583 | HG22 | VAL | 38 | -4.986 | 16.295 | -1.985 | 1.00 | 0.00 |
| ATOM | 584 | HG23 | VAL | 38 | -4.833 | 17.268 | -0.502 | 1.00 | 0.00 |
| ATOM | 585 | C    | VAL | 38 | -6.980 | 19.789 | -1.483 | 1.00 | 0.00 |
| ATOM | 586 | O    | VAL | 38 | -7.484 | 19.810 | -0.359 | 1.00 | 0.00 |

|      |     |     |     |    |         |        |        |      |      |
|------|-----|-----|-----|----|---------|--------|--------|------|------|
| ATOM | 587 | N   | SER | 39 | -7.691  | 19.797 | -2.616 | 1.00 | 0.00 |
| ATOM | 588 | H   | SER | 39 | -7.214  | 19.850 | -3.505 | 1.00 | 0.00 |
| ATOM | 589 | CA  | SER | 39 | -9.143  | 19.821 | -2.612 | 1.00 | 0.00 |
| ATOM | 590 | HA  | SER | 39 | -9.492  | 20.774 | -2.214 | 1.00 | 0.00 |
| ATOM | 591 | CB  | SER | 39 | -9.698  | 19.651 | -4.041 | 1.00 | 0.00 |
| ATOM | 592 | HB2 | SER | 39 | -10.532 | 20.343 | -4.161 | 1.00 | 0.00 |
| ATOM | 593 | HB3 | SER | 39 | -8.905  | 19.914 | -4.742 | 1.00 | 0.00 |
| ATOM | 594 | OG  | SER | 39 | -10.140 | 18.326 | -4.302 | 1.00 | 0.00 |
| ATOM | 595 | HG  | SER | 39 | -10.475 | 18.272 | -5.200 | 1.00 | 0.00 |
| ATOM | 596 | C   | SER | 39 | -9.721  | 18.755 | -1.668 | 1.00 | 0.00 |
| ATOM | 597 | O   | SER | 39 | -9.086  | 17.746 | -1.321 | 1.00 | 0.00 |
| ATOM | 598 | N   | PRO | 40 | -11.010 | 18.895 | -1.354 | 1.00 | 0.00 |
| ATOM | 599 | CD  | PRO | 40 | -11.909 | 19.945 | -1.804 | 1.00 | 0.00 |
| ATOM | 600 | HD2 | PRO | 40 | -12.054 | 19.824 | -2.878 | 1.00 | 0.00 |
| ATOM | 601 | HD3 | PRO | 40 | -11.428 | 20.904 | -1.610 | 1.00 | 0.00 |
| ATOM | 602 | CG  | PRO | 40 | -13.203 | 19.773 | -1.014 | 1.00 | 0.00 |
| ATOM | 603 | HG2 | PRO | 40 | -14.014 | 19.540 | -1.704 | 1.00 | 0.00 |
| ATOM | 604 | HG3 | PRO | 40 | -13.428 | 20.703 | -0.492 | 1.00 | 0.00 |
| ATOM | 605 | CB  | PRO | 40 | -12.967 | 18.635 | -0.025 | 1.00 | 0.00 |
| ATOM | 606 | HB2 | PRO | 40 | -13.802 | 17.936 | -0.053 | 1.00 | 0.00 |
| ATOM | 607 | HB3 | PRO | 40 | -12.836 | 19.004 | 0.992  | 1.00 | 0.00 |
| ATOM | 608 | CA  | PRO | 40 | -11.684 | 17.935 | -0.498 | 1.00 | 0.00 |

|      |     |      |     |    |         |        |        |      |      |
|------|-----|------|-----|----|---------|--------|--------|------|------|
| ATOM | 609 | HA   | PRO | 40 | -11.052 | 17.743 | 0.368  | 1.00 | 0.00 |
| ATOM | 610 | C    | PRO | 40 | -11.957 | 16.619 | -1.232 | 1.00 | 0.00 |
| ATOM | 611 | O    | PRO | 40 | -11.396 | 16.289 | -2.284 | 1.00 | 0.00 |
| ATOM | 612 | N    | ARG | 41 | -12.814 | 15.787 | -0.647 | 1.00 | 0.00 |
| ATOM | 613 | H    | ARG | 41 | -13.150 | 16.009 | 0.279  | 1.00 | 0.00 |
| ATOM | 614 | CA   | ARG | 41 | -13.235 | 14.549 | -1.247 | 1.00 | 0.00 |
| ATOM | 615 | HA   | ARG | 41 | -12.388 | 14.072 | -1.740 | 1.00 | 0.00 |
| ATOM | 616 | CB   | ARG | 41 | -13.784 | 13.595 | -0.183 | 1.00 | 0.00 |
| ATOM | 617 | HB2  | ARG | 41 | -13.157 | 13.656 | 0.706  | 1.00 | 0.00 |
| ATOM | 618 | HB3  | ARG | 41 | -14.802 | 13.891 | 0.069  | 1.00 | 0.00 |
| ATOM | 619 | CG   | ARG | 41 | -13.786 | 12.149 | -0.711 | 1.00 | 0.00 |
| ATOM | 620 | HG2  | ARG | 41 | -13.204 | 12.129 | -1.633 | 1.00 | 0.00 |
| ATOM | 621 | HG3  | ARG | 41 | -13.304 | 11.519 | 0.036  | 1.00 | 0.00 |
| ATOM | 622 | CD   | ARG | 41 | -15.193 | 11.626 | -0.987 | 1.00 | 0.00 |
| ATOM | 623 | HD2  | ARG | 41 | -15.920 | 12.418 | -0.805 | 1.00 | 0.00 |
| ATOM | 624 | HD3  | ARG | 41 | -15.265 | 11.299 | -2.025 | 1.00 | 0.00 |
| ATOM | 625 | NE   | ARG | 41 | -15.504 | 10.495 | -0.117 | 1.00 | 0.00 |
| ATOM | 626 | HE   | ARG | 41 | -15.432 | 9.577  | -0.530 | 1.00 | 0.00 |
| ATOM | 627 | CZ   | ARG | 41 | -15.964 | 10.597 | 1.117  | 1.00 | 0.00 |
| ATOM | 628 | NH1  | ARG | 41 | -16.114 | 11.768 | 1.689  | 1.00 | 0.00 |
| ATOM | 629 | HH11 | ARG | 41 | -15.875 | 12.609 | 1.182  | 1.00 | 0.00 |
| ATOM | 630 | HH12 | ARG | 41 | -16.467 | 11.824 | 2.633  | 1.00 | 0.00 |

|      |     |          |    |         |        |        |      |      |
|------|-----|----------|----|---------|--------|--------|------|------|
| ATOM | 631 | NH2 ARG  | 41 | -16.172 | 9.518  | 1.818  | 1.00 | 0.00 |
| ATOM | 632 | HH21 ARG | 41 | -15.980 | 8.613  | 1.414  | 1.00 | 0.00 |
| ATOM | 633 | HH22 ARG | 41 | -16.524 | 9.593  | 2.761  | 1.00 | 0.00 |
| ATOM | 634 | C ARG    | 41 | -14.264 | 14.812 | -2.323 | 1.00 | 0.00 |
| ATOM | 635 | O ARG    | 41 | -15.277 | 14.157 | -2.315 | 1.00 | 0.00 |
| ATOM | 636 | N MET    | 42 | -14.016 | 15.744 | -3.230 | 1.00 | 0.00 |
| ATOM | 637 | H MET    | 42 | -13.161 | 16.279 | -3.164 | 1.00 | 0.00 |
| ATOM | 638 | CA MET   | 42 | -14.928 | 16.035 | -4.324 | 1.00 | 0.00 |
| ATOM | 639 | HA MET   | 42 | -15.803 | 16.575 | -3.962 | 1.00 | 0.00 |
| ATOM | 640 | CB MET   | 42 | -14.204 | 16.909 | -5.349 | 1.00 | 0.00 |
| ATOM | 641 | HB2 MET  | 42 | -14.824 | 16.982 | -6.243 | 1.00 | 0.00 |
| ATOM | 642 | HB3 MET  | 42 | -14.065 | 17.902 | -4.922 | 1.00 | 0.00 |
| ATOM | 643 | CG MET   | 42 | -12.836 | 16.317 | -5.723 | 1.00 | 0.00 |
| ATOM | 644 | HG2 MET  | 42 | -12.094 | 16.722 | -5.034 | 1.00 | 0.00 |
| ATOM | 645 | HG3 MET  | 42 | -12.893 | 15.236 | -5.601 | 1.00 | 0.00 |
| ATOM | 646 | SD MET   | 42 | -12.343 | 16.697 | -7.413 | 1.00 | 0.00 |
| ATOM | 647 | CE MET   | 42 | -11.870 | 18.429 | -7.161 | 1.00 | 0.00 |
| ATOM | 648 | HE1 MET  | 42 | -11.065 | 18.484 | -6.428 | 1.00 | 0.00 |
| ATOM | 649 | HE2 MET  | 42 | -11.529 | 18.855 | -8.106 | 1.00 | 0.00 |
| ATOM | 650 | HE3 MET  | 42 | -12.730 | 18.992 | -6.799 | 1.00 | 0.00 |
| ATOM | 651 | C MET    | 42 | -15.416 | 14.762 | -5.027 | 1.00 | 0.00 |
| ATOM | 652 | O MET    | 42 | -16.512 | 14.757 | -5.560 | 1.00 | 0.00 |

|      |     |      |     |    |         |        |        |      |      |
|------|-----|------|-----|----|---------|--------|--------|------|------|
| ATOM | 653 | N    | ARG | 43 | -14.586 | 13.701 | -5.009 | 1.00 | 0.00 |
| ATOM | 654 | H    | ARG | 43 | -13.646 | 13.832 | -4.664 | 1.00 | 0.00 |
| ATOM | 655 | CA   | ARG | 43 | -14.946 | 12.411 | -5.534 | 1.00 | 0.00 |
| ATOM | 656 | HA   | ARG | 43 | -15.084 | 12.478 | -6.614 | 1.00 | 0.00 |
| ATOM | 657 | CB   | ARG | 43 | -13.844 | 11.385 | -5.244 | 1.00 | 0.00 |
| ATOM | 658 | HB2  | ARG | 43 | -12.923 | 11.903 | -4.973 | 1.00 | 0.00 |
| ATOM | 659 | HB3  | ARG | 43 | -14.152 | 10.739 | -4.423 | 1.00 | 0.00 |
| ATOM | 660 | CG   | ARG | 43 | -13.603 | 10.538 | -6.498 | 1.00 | 0.00 |
| ATOM | 661 | HG2  | ARG | 43 | -13.308 | 9.533  | -6.197 | 1.00 | 0.00 |
| ATOM | 662 | HG3  | ARG | 43 | -14.526 | 10.488 | -7.076 | 1.00 | 0.00 |
| ATOM | 663 | CD   | ARG | 43 | -12.494 | 11.160 | -7.359 | 1.00 | 0.00 |
| ATOM | 664 | HD2  | ARG | 43 | -12.530 | 10.733 | -8.362 | 1.00 | 0.00 |
| ATOM | 665 | HD3  | ARG | 43 | -12.643 | 12.239 | -7.419 | 1.00 | 0.00 |
| ATOM | 666 | NE   | ARG | 43 | -11.158 | 10.897 | -6.779 | 1.00 | 0.00 |
| ATOM | 667 | HE   | ARG | 43 | -11.098 | 10.117 | -6.142 | 1.00 | 0.00 |
| ATOM | 668 | CZ   | ARG | 43 | -10.050 | 11.547 | -7.085 | 1.00 | 0.00 |
| ATOM | 669 | NH1  | ARG | 43 | -10.067 | 12.539 | -7.934 | 1.00 | 0.00 |
| ATOM | 670 | HH11 | ARG | 43 | -10.937 | 12.817 | -8.365 | 1.00 | 0.00 |
| ATOM | 671 | HH12 | ARG | 43 | -9.209  | 13.025 | -8.156 | 1.00 | 0.00 |
| ATOM | 672 | NH2  | ARG | 43 | -8.925  | 11.253 | -6.477 | 1.00 | 0.00 |
| ATOM | 673 | HH21 | ARG | 43 | -8.909  | 10.528 | -5.775 | 1.00 | 0.00 |
| ATOM | 674 | HH22 | ARG | 43 | -8.080  | 11.754 | -6.715 | 1.00 | 0.00 |



|      |     |     |     |    |         |        |        |      |      |
|------|-----|-----|-----|----|---------|--------|--------|------|------|
| ATOM | 675 | C   | ARG | 43 | -16.287 | 11.966 | -4.971 | 1.00 | 0.00 |
| ATOM | 676 | O   | ARG | 43 | -16.530 | 12.076 | -3.777 | 1.00 | 0.00 |
| ATOM | 677 | N   | GLU | 44 | -17.078 | 11.342 | -5.806 | 1.00 | 0.00 |
| ATOM | 678 | H   | GLU | 44 | -16.815 | 11.261 | -6.778 | 1.00 | 0.00 |
| ATOM | 679 | CA  | GLU | 44 | -18.365 | 10.796 | -5.390 | 1.00 | 0.00 |
| ATOM | 680 | HA  | GLU | 44 | -18.582 | 11.092 | -4.364 | 1.00 | 0.00 |
| ATOM | 681 | CB  | GLU | 44 | -19.475 | 11.328 | -6.297 | 1.00 | 0.00 |
| ATOM | 682 | HB2 | GLU | 44 | -20.419 | 10.886 | -5.981 | 1.00 | 0.00 |
| ATOM | 683 | HB3 | GLU | 44 | -19.524 | 12.411 | -6.182 | 1.00 | 0.00 |
| ATOM | 684 | CG  | GLU | 44 | -19.216 | 10.981 | -7.777 | 1.00 | 0.00 |
| ATOM | 685 | HG2 | GLU | 44 | -19.049 | 11.879 | -8.373 | 1.00 | 0.00 |
| ATOM | 686 | HG3 | GLU | 44 | -18.313 | 10.371 | -7.780 | 1.00 | 0.00 |
| ATOM | 687 | CD  | GLU | 44 | -20.375 | 10.180 | -8.375 | 1.00 | 0.00 |
| ATOM | 688 | OE1 | GLU | 44 | -20.385 | 8.950  | -8.145 | 1.00 | 0.00 |
| ATOM | 689 | OE2 | GLU | 44 | -21.254 | 10.833 | -8.984 | 1.00 | 0.00 |
| ATOM | 690 | C   | GLU | 44 | -18.342 | 9.266  | -5.417 | 1.00 | 0.00 |
| ATOM | 691 | O   | GLU | 44 | -19.073 | 8.624  | -4.672 | 1.00 | 0.00 |
| ATOM | 692 | N   | GLU | 45 | -17.390 | 8.693  | -6.162 | 1.00 | 0.00 |
| ATOM | 693 | H   | GLU | 45 | -16.742 | 9.276  | -6.673 | 1.00 | 0.00 |
| ATOM | 694 | CA  | GLU | 45 | -17.283 | 7.260  | -6.308 | 1.00 | 0.00 |
| ATOM | 695 | HA  | GLU | 45 | -18.279 | 6.821  | -6.357 | 1.00 | 0.00 |
| ATOM | 696 | CB  | GLU | 45 | -16.524 | 6.899  | -7.594 | 1.00 | 0.00 |

|      |     |     |     |    |         |       |         |      |      |
|------|-----|-----|-----|----|---------|-------|---------|------|------|
| ATOM | 697 | HB2 | GLU | 45 | -15.997 | 7.782 | -7.956  | 1.00 | 0.00 |
| ATOM | 698 | HB3 | GLU | 45 | -15.804 | 6.112 | -7.374  | 1.00 | 0.00 |
| ATOM | 699 | CG  | GLU | 45 | -17.505 | 6.409 | -8.674  | 1.00 | 0.00 |
| ATOM | 700 | HG2 | GLU | 45 | -17.750 | 5.348 | -8.695  | 1.00 | 0.00 |
| ATOM | 701 | HG3 | GLU | 45 | -18.380 | 6.978 | -8.360  | 1.00 | 0.00 |
| ATOM | 702 | CD  | GLU | 45 | -17.079 | 6.861 | -10.072 | 1.00 | 0.00 |
| ATOM | 703 | OE1 | GLU | 45 | -17.166 | 8.078 | -10.344 | 1.00 | 0.00 |
| ATOM | 704 | OE2 | GLU | 45 | -16.452 | 6.026 | -10.767 | 1.00 | 0.00 |
| ATOM | 705 | C   | GLU | 45 | -16.584 | 6.718 | -5.072  | 1.00 | 0.00 |
| ATOM | 706 | O   | GLU | 45 | -15.406 | 7.022 | -4.811  | 1.00 | 0.00 |
| ATOM | 707 | N   | ASP | 46 | -17.301 | 5.885 | -4.326  | 1.00 | 0.00 |
| ATOM | 708 | H   | ASP | 46 | -18.246 | 5.662 | -4.603  | 1.00 | 0.00 |
| ATOM | 709 | CA  | ASP | 46 | -16.778 | 5.282 | -3.119  | 1.00 | 0.00 |
| ATOM | 710 | HA  | ASP | 46 | -16.377 | 6.058 | -2.467  | 1.00 | 0.00 |
| ATOM | 711 | CB  | ASP | 46 | -17.879 | 4.529 | -2.366  | 1.00 | 0.00 |
| ATOM | 712 | HB2 | ASP | 46 | -18.754 | 5.162 | -2.513  | 1.00 | 0.00 |
| ATOM | 713 | HB3 | ASP | 46 | -18.067 | 3.545 | -2.795  | 1.00 | 0.00 |
| ATOM | 714 | CG  | ASP | 46 | -17.597 | 4.388 | -0.867  | 1.00 | 0.00 |
| ATOM | 715 | OD1 | ASP | 46 | -16.570 | 4.943 | -0.398  | 1.00 | 0.00 |
| ATOM | 716 | OD2 | ASP | 46 | -18.343 | 3.638 | -0.207  | 1.00 | 0.00 |
| ATOM | 717 | C   | ASP | 46 | -15.668 | 4.305 | -3.492  | 1.00 | 0.00 |
| ATOM | 718 | O   | ASP | 46 | -15.733 | 3.564 | -4.485  | 1.00 | 0.00 |

|      |     |     |     |    |         |       |        |      |      |
|------|-----|-----|-----|----|---------|-------|--------|------|------|
| ATOM | 719 | N   | HID | 47 | -14.590 | 4.286 | -2.720 | 1.00 | 0.00 |
| ATOM | 720 | H   | HID | 47 | -14.508 | 4.946 | -1.960 | 1.00 | 0.00 |
| ATOM | 721 | CA  | HID | 47 | -13.479 | 3.382 | -2.970 | 1.00 | 0.00 |
| ATOM | 722 | HA  | HID | 47 | -13.718 | 2.711 | -3.795 | 1.00 | 0.00 |
| ATOM | 723 | CB  | HID | 47 | -12.237 | 4.184 | -3.340 | 1.00 | 0.00 |
| ATOM | 724 | HB2 | HID | 47 | -12.059 | 4.986 | -2.623 | 1.00 | 0.00 |
| ATOM | 725 | HB3 | HID | 47 | -11.360 | 3.539 | -3.389 | 1.00 | 0.00 |
| ATOM | 726 | CG  | HID | 47 | -12.367 | 4.839 | -4.697 | 1.00 | 0.00 |
| ATOM | 727 | ND1 | HID | 47 | -13.346 | 4.539 | -5.636 | 1.00 | 0.00 |
| ATOM | 728 | HD1 | HID | 47 | -14.069 | 3.841 | -5.539 | 1.00 | 0.00 |
| ATOM | 729 | CE1 | HID | 47 | -13.161 | 5.343 | -6.700 | 1.00 | 0.00 |
| ATOM | 730 | HE1 | HID | 47 | -13.843 | 5.297 | -7.550 | 1.00 | 0.00 |
| ATOM | 731 | NE2 | HID | 47 | -12.067 | 6.115 | -6.478 | 1.00 | 0.00 |
| ATOM | 732 | CD2 | HID | 47 | -11.557 | 5.816 | -5.223 | 1.00 | 0.00 |
| ATOM | 733 | HD2 | HID | 47 | -10.674 | 6.339 | -4.855 | 1.00 | 0.00 |
| ATOM | 734 | C   | HID | 47 | -13.261 | 2.534 | -1.753 | 1.00 | 0.00 |
| ATOM | 735 | O   | HID | 47 | -13.038 | 3.089 | -0.687 | 1.00 | 0.00 |
| ATOM | 736 | N   | LYS | 48 | -13.245 | 1.213 | -1.953 | 1.00 | 0.00 |
| ATOM | 737 | H   | LYS | 48 | -13.426 | 0.877 | -2.888 | 1.00 | 0.00 |
| ATOM | 738 | CA  | LYS | 48 | -13.038 | 0.234 | -0.894 | 1.00 | 0.00 |
| ATOM | 739 | HA  | LYS | 48 | -12.005 | 0.273 | -0.547 | 1.00 | 0.00 |
| ATOM | 740 | CB  | LYS | 48 | -13.963 | 0.535 | 0.288  | 1.00 | 0.00 |

|      |     |         |    |         |        |        |      |      |
|------|-----|---------|----|---------|--------|--------|------|------|
| ATOM | 741 | HB2 LYS | 48 | -14.539 | 1.434  | 0.066  | 1.00 | 0.00 |
| ATOM | 742 | HB3 LYS | 48 | -14.642 | -0.306 | 0.428  | 1.00 | 0.00 |
| ATOM | 743 | CG LYS  | 48 | -13.148 | 0.754  | 1.569  | 1.00 | 0.00 |
| ATOM | 744 | HG2 LYS | 48 | -12.497 | -0.107 | 1.719  | 1.00 | 0.00 |
| ATOM | 745 | HG3 LYS | 48 | -12.540 | 1.651  | 1.445  | 1.00 | 0.00 |
| ATOM | 746 | CD LYS  | 48 | -14.064 | 0.921  | 2.788  | 1.00 | 0.00 |
| ATOM | 747 | HD2 LYS | 48 | -13.476 | 1.311  | 3.619  | 1.00 | 0.00 |
| ATOM | 748 | HD3 LYS | 48 | -14.855 | 1.629  | 2.539  | 1.00 | 0.00 |
| ATOM | 749 | CE LYS  | 48 | -14.688 | -0.425 | 3.189  | 1.00 | 0.00 |
| ATOM | 750 | HE2 LYS | 48 | -13.950 | -1.213 | 3.037  | 1.00 | 0.00 |
| ATOM | 751 | HE3 LYS | 48 | -14.964 | -0.384 | 4.242  | 1.00 | 0.00 |
| ATOM | 752 | NZ LYS  | 48 | -15.895 | -0.713 | 2.372  | 1.00 | 0.00 |
| ATOM | 753 | HZ1 LYS | 48 | -15.639 | -0.751 | 1.395  | 1.00 | 0.00 |
| ATOM | 754 | HZ2 LYS | 48 | -16.287 | -1.600 | 2.652  | 1.00 | 0.00 |
| ATOM | 755 | HZ3 LYS | 48 | -16.579 | 0.017  | 2.512  | 1.00 | 0.00 |
| ATOM | 756 | C LYS   | 48 | -13.270 | -1.176 | -1.409 | 1.00 | 0.00 |
| ATOM | 757 | O LYS   | 48 | -12.561 | -2.099 | -1.048 | 1.00 | 0.00 |
| ATOM | 758 | N GLN   | 49 | -14.190 | -1.312 | -2.359 | 1.00 | 0.00 |
| ATOM | 759 | H GLN   | 49 | -14.706 | -0.503 | -2.678 | 1.00 | 0.00 |
| ATOM | 760 | CA GLN  | 49 | -14.470 | -2.582 | -2.969 | 1.00 | 0.00 |
| ATOM | 761 | HA GLN  | 49 | -14.266 | -3.378 | -2.254 | 1.00 | 0.00 |
| ATOM | 762 | CB GLN  | 49 | -15.924 | -2.681 | -3.406 | 1.00 | 0.00 |

|      |     |      |     |    |         |        |        |      |      |
|------|-----|------|-----|----|---------|--------|--------|------|------|
| ATOM | 763 | HB2  | GLN | 49 | -16.379 | -1.690 | -3.381 | 1.00 | 0.00 |
| ATOM | 764 | HB3  | GLN | 49 | -15.972 | -3.076 | -4.421 | 1.00 | 0.00 |
| ATOM | 765 | CG   | GLN | 49 | -16.680 | -3.612 | -2.461 | 1.00 | 0.00 |
| ATOM | 766 | HG2  | GLN | 49 | -16.197 | -4.588 | -2.491 | 1.00 | 0.00 |
| ATOM | 767 | HG3  | GLN | 49 | -16.643 | -3.219 | -1.445 | 1.00 | 0.00 |
| ATOM | 768 | CD   | GLN | 49 | -18.136 | -3.777 | -2.865 | 1.00 | 0.00 |
| ATOM | 769 | OE1  | GLN | 49 | -18.576 | -3.366 | -3.919 | 1.00 | 0.00 |
| ATOM | 770 | NE2  | GLN | 49 | -18.918 | -4.375 | -1.997 | 1.00 | 0.00 |
| ATOM | 771 | HE21 | GLN | 49 | -19.895 | -4.511 | -2.213 | 1.00 | 0.00 |
| ATOM | 772 | HE22 | GLN | 49 | -18.539 | -4.695 | -1.118 | 1.00 | 0.00 |
| ATOM | 773 | C    | GLN | 49 | -13.607 | -2.740 | -4.182 | 1.00 | 0.00 |
| ATOM | 774 | O    | GLN | 49 | -13.257 | -3.852 | -4.436 | 1.00 | 0.00 |
| ATOM | 775 | N    | LEU | 50 | -13.139 | -1.690 | -4.850 | 1.00 | 0.00 |
| ATOM | 776 | H    | LEU | 50 | -13.457 | -0.774 | -4.567 | 1.00 | 0.00 |
| ATOM | 777 | CA   | LEU | 50 | -12.244 | -1.785 | -5.991 | 1.00 | 0.00 |
| ATOM | 778 | HA   | LEU | 50 | -12.658 | -2.443 | -6.755 | 1.00 | 0.00 |
| ATOM | 779 | CB   | LEU | 50 | -12.073 | -0.380 | -6.593 | 1.00 | 0.00 |
| ATOM | 780 | HB2  | LEU | 50 | -12.186 | 0.313  | -5.759 | 1.00 | 0.00 |
| ATOM | 781 | HB3  | LEU | 50 | -11.071 | -0.282 | -7.013 | 1.00 | 0.00 |
| ATOM | 782 | CG   | LEU | 50 | -13.116 | -0.053 | -7.676 | 1.00 | 0.00 |
| ATOM | 783 | HG   | LEU | 50 | -14.055 | -0.553 | -7.439 | 1.00 | 0.00 |
| ATOM | 784 | CD1  | LEU | 50 | -13.344 | 1.462  | -7.729 | 1.00 | 0.00 |

|      |     |      |     |    |         |        |        |      |      |
|------|-----|------|-----|----|---------|--------|--------|------|------|
| ATOM | 785 | HD11 | LEU | 50 | -12.406 | 1.963  | -7.967 | 1.00 | 0.00 |
| ATOM | 786 | HD12 | LEU | 50 | -14.083 | 1.693  | -8.497 | 1.00 | 0.00 |
| ATOM | 787 | HD13 | LEU | 50 | -13.706 | 1.810  | -6.762 | 1.00 | 0.00 |
| ATOM | 788 | CD2  | LEU | 50 | -12.666 | -0.582 | -9.040 | 1.00 | 0.00 |
| ATOM | 789 | HD21 | LEU | 50 | -12.541 | -1.663 | -8.988 | 1.00 | 0.00 |
| ATOM | 790 | HD22 | LEU | 50 | -13.418 | -0.339 | -9.791 | 1.00 | 0.00 |
| ATOM | 791 | HD23 | LEU | 50 | -11.718 | -0.120 | -9.315 | 1.00 | 0.00 |
| ATOM | 792 | C    | LEU | 50 | -10.905 | -2.385 | -5.559 | 1.00 | 0.00 |
| ATOM | 793 | O    | LEU | 50 | -10.221 | -2.979 | -6.371 | 1.00 | 0.00 |
| ATOM | 794 | N    | CYX | 51 | -10.566 | -2.282 | -4.271 | 1.00 | 0.00 |
| ATOM | 795 | H    | CYX | 51 | -11.141 | -1.721 | -3.659 | 1.00 | 0.00 |
| ATOM | 796 | CA   | CYX | 51 | -9.379  | -2.892 | -3.726 | 1.00 | 0.00 |
| ATOM | 797 | HA   | CYX | 51 | -8.606  | -2.953 | -4.492 | 1.00 | 0.00 |
| ATOM | 798 | CB   | CYX | 51 | -8.853  | -2.065 | -2.573 | 1.00 | 0.00 |
| ATOM | 799 | HB2  | CYX | 51 | -7.767  | -2.146 | -2.533 | 1.00 | 0.00 |
| ATOM | 800 | HB3  | CYX | 51 | -9.133  | -1.021 | -2.717 | 1.00 | 0.00 |
| ATOM | 801 | SG   | CYX | 51 | -9.409  | -2.448 | -0.881 | 1.00 | 0.00 |
| ATOM | 802 | C    | CYX | 51 | -9.672  | -4.300 | -3.288 | 1.00 | 0.00 |
| ATOM | 803 | O    | CYX | 51 | -8.964  | -5.179 | -3.735 | 1.00 | 0.00 |
| ATOM | 804 | N    | CYX | 52 | -10.778 | -4.523 | -2.566 | 1.00 | 0.00 |
| ATOM | 805 | H    | CYX | 52 | -11.314 | -3.730 | -2.243 | 1.00 | 0.00 |
| ATOM | 806 | CA   | CYX | 52 | -11.187 | -5.852 | -2.142 | 1.00 | 0.00 |

|      |     |     |     |    |         |        |         |      |      |
|------|-----|-----|-----|----|---------|--------|---------|------|------|
| ATOM | 807 | HA  | CYX | 52 | -10.326 | -6.402 | -1.762  | 1.00 | 0.00 |
| ATOM | 808 | CB  | CYX | 52 | -12.238 | -5.753 | -1.028  | 1.00 | 0.00 |
| ATOM | 809 | HB2 | CYX | 52 | -12.828 | -4.846 | -1.164  | 1.00 | 0.00 |
| ATOM | 810 | HB3 | CYX | 52 | -12.894 | -6.622 | -1.069  | 1.00 | 0.00 |
| ATOM | 811 | SG  | CYX | 52 | -11.490 | -5.736 | 0.633   | 1.00 | 0.00 |
| ATOM | 812 | C   | CYX | 52 | -11.683 | -6.663 | -3.344  | 1.00 | 0.00 |
| ATOM | 813 | O   | CYX | 52 | -12.017 | -7.830 | -3.202  | 1.00 | 0.00 |
| ATOM | 814 | N   | MET | 53 | -11.742 | -6.050 | -4.525  | 1.00 | 0.00 |
| ATOM | 815 | H   | MET | 53 | -11.419 | -5.093 | -4.561  | 1.00 | 0.00 |
| ATOM | 816 | CA  | MET | 53 | -12.243 | -6.646 | -5.734  | 1.00 | 0.00 |
| ATOM | 817 | HA  | MET | 53 | -12.901 | -7.477 | -5.484  | 1.00 | 0.00 |
| ATOM | 818 | CB  | MET | 53 | -13.033 | -5.630 | -6.566  | 1.00 | 0.00 |
| ATOM | 819 | HB2 | MET | 53 | -13.994 | -5.457 | -6.082  | 1.00 | 0.00 |
| ATOM | 820 | HB3 | MET | 53 | -12.470 | -4.696 | -6.599  | 1.00 | 0.00 |
| ATOM | 821 | CG  | MET | 53 | -13.263 | -6.131 | -7.981  | 1.00 | 0.00 |
| ATOM | 822 | HG2 | MET | 53 | -13.024 | -7.193 | -8.029  | 1.00 | 0.00 |
| ATOM | 823 | HG3 | MET | 53 | -14.309 | -5.981 | -8.249  | 1.00 | 0.00 |
| ATOM | 824 | SD  | MET | 53 | -12.217 | -5.235 | -9.151  | 1.00 | 0.00 |
| ATOM | 825 | CE  | MET | 53 | -11.893 | -6.575 | -10.316 | 1.00 | 0.00 |
| ATOM | 826 | HE1 | MET | 53 | -12.835 | -6.930 | -10.733 | 1.00 | 0.00 |
| ATOM | 827 | HE2 | MET | 53 | -11.254 | -6.210 | -11.121 | 1.00 | 0.00 |
| ATOM | 828 | HE3 | MET | 53 | -11.393 | -7.394 | -9.799  | 1.00 | 0.00 |

|      |     |      |     |    |         |        |         |      |      |
|------|-----|------|-----|----|---------|--------|---------|------|------|
| ATOM | 829 | C    | MET | 53 | -11.053 | -7.151 | -6.513  | 1.00 | 0.00 |
| ATOM | 830 | O    | MET | 53 | -11.041 | -8.305 | -6.907  | 1.00 | 0.00 |
| ATOM | 831 | N    | GLN | 54 | -10.090 | -6.275 | -6.791  | 1.00 | 0.00 |
| ATOM | 832 | H    | GLN | 54 | -10.146 | -5.321 | -6.463  | 1.00 | 0.00 |
| ATOM | 833 | CA   | GLN | 54 | -8.931  | -6.667 | -7.563  | 1.00 | 0.00 |
| ATOM | 834 | HA   | GLN | 54 | -9.247  | -7.205 | -8.457  | 1.00 | 0.00 |
| ATOM | 835 | CB   | GLN | 54 | -8.141  | -5.450 | -7.987  | 1.00 | 0.00 |
| ATOM | 836 | HB2  | GLN | 54 | -8.228  | -4.699 | -7.202  | 1.00 | 0.00 |
| ATOM | 837 | HB3  | GLN | 54 | -7.097  | -5.744 | -8.093  | 1.00 | 0.00 |
| ATOM | 838 | CG   | GLN | 54 | -8.637  | -4.870 | -9.297  | 1.00 | 0.00 |
| ATOM | 839 | HG2  | GLN | 54 | -7.889  | -5.057 | -10.068 | 1.00 | 0.00 |
| ATOM | 840 | HG3  | GLN | 54 | -9.562  | -5.385 | -9.556  | 1.00 | 0.00 |
| ATOM | 841 | CD   | GLN | 54 | -8.913  | -3.375 | -9.241  | 1.00 | 0.00 |
| ATOM | 842 | OE1  | GLN | 54 | -8.221  | -2.564 | -8.666  | 1.00 | 0.00 |
| ATOM | 843 | NE2  | GLN | 54 | -9.965  | -2.931 | -9.870  | 1.00 | 0.00 |
| ATOM | 844 | HE21 | GLN | 54 | -10.180 | -1.944 | -9.855  | 1.00 | 0.00 |
| ATOM | 845 | HE22 | GLN | 54 | -10.560 | -3.575 | -10.370 | 1.00 | 0.00 |
| ATOM | 846 | C    | GLN | 54 | -8.030  | -7.549 | -6.738  | 1.00 | 0.00 |
| ATOM | 847 | O    | GLN | 54 | -7.416  | -8.431 | -7.307  | 1.00 | 0.00 |
| ATOM | 848 | N    | LEU | 55 | -7.986  | -7.375 | -5.415  | 1.00 | 0.00 |
| ATOM | 849 | H    | LEU | 55 | -8.540  | -6.645 | -4.990  | 1.00 | 0.00 |
| ATOM | 850 | CA   | LEU | 55 | -7.152  | -8.198 | -4.555  | 1.00 | 0.00 |



|      |     |      |     |    |         |         |        |      |      |
|------|-----|------|-----|----|---------|---------|--------|------|------|
| ATOM | 851 | HA   | LEU | 55 | -6.098  | -8.065  | -4.802 | 1.00 | 0.00 |
| ATOM | 852 | CB   | LEU | 55 | -7.369  | -7.778  | -3.111 | 1.00 | 0.00 |
| ATOM | 853 | HB2  | LEU | 55 | -8.342  | -7.289  | -3.150 | 1.00 | 0.00 |
| ATOM | 854 | HB3  | LEU | 55 | -7.430  | -8.658  | -2.471 | 1.00 | 0.00 |
| ATOM | 855 | CG   | LEU | 55 | -6.323  | -6.797  | -2.538 | 1.00 | 0.00 |
| ATOM | 856 | HG   | LEU | 55 | -5.773  | -6.372  | -3.379 | 1.00 | 0.00 |
| ATOM | 857 | CD1  | LEU | 55 | -6.948  | -5.662  | -1.709 | 1.00 | 0.00 |
| ATOM | 858 | HD11 | LEU | 55 | -7.497  | -6.085  | -0.869 | 1.00 | 0.00 |
| ATOM | 859 | HD12 | LEU | 55 | -6.160  | -5.008  | -1.336 | 1.00 | 0.00 |
| ATOM | 860 | HD13 | LEU | 55 | -7.630  | -5.087  | -2.336 | 1.00 | 0.00 |
| ATOM | 861 | CD2  | LEU | 55 | -5.265  | -7.540  | -1.717 | 1.00 | 0.00 |
| ATOM | 862 | HD21 | LEU | 55 | -4.754  | -8.263  | -2.352 | 1.00 | 0.00 |
| ATOM | 863 | HD22 | LEU | 55 | -4.541  | -6.825  | -1.326 | 1.00 | 0.00 |
| ATOM | 864 | HD23 | LEU | 55 | -5.746  | -8.060  | -0.889 | 1.00 | 0.00 |
| ATOM | 865 | C    | LEU | 55 | -7.527  | -9.660  | -4.741 | 1.00 | 0.00 |
| ATOM | 866 | O    | LEU | 55 | -6.678  | -10.516 | -4.595 | 1.00 | 0.00 |
| ATOM | 867 | N    | LYS | 56 | -8.776  | -9.938  | -5.116 | 1.00 | 0.00 |
| ATOM | 868 | H    | LYS | 56 | -9.482  | -9.216  | -5.077 | 1.00 | 0.00 |
| ATOM | 869 | CA   | LYS | 56 | -9.184  | -11.276 | -5.478 | 1.00 | 0.00 |
| ATOM | 870 | HA   | LYS | 56 | -8.866  | -11.993 | -4.722 | 1.00 | 0.00 |
| ATOM | 871 | CB   | LYS | 56 | -10.707 | -11.313 | -5.576 | 1.00 | 0.00 |
| ATOM | 872 | HB2  | LYS | 56 | -11.129 | -11.065 | -4.603 | 1.00 | 0.00 |

|      |     |         |    |         |         |        |      |      |
|------|-----|---------|----|---------|---------|--------|------|------|
| ATOM | 873 | HB3 LYS | 56 | -11.031 | -10.575 | -6.311 | 1.00 | 0.00 |
| ATOM | 874 | CG LYS  | 56 | -11.189 | -12.703 | -6.002 | 1.00 | 0.00 |
| ATOM | 875 | HG2 LYS | 56 | -11.492 | -12.665 | -7.049 | 1.00 | 0.00 |
| ATOM | 876 | HG3 LYS | 56 | -10.368 | -13.411 | -5.887 | 1.00 | 0.00 |
| ATOM | 877 | CD LYS  | 56 | -12.373 | -13.152 | -5.145 | 1.00 | 0.00 |
| ATOM | 878 | HD2 LYS | 56 | -11.997 | -13.617 | -4.235 | 1.00 | 0.00 |
| ATOM | 879 | HD3 LYS | 56 | -12.975 | -12.281 | -4.886 | 1.00 | 0.00 |
| ATOM | 880 | CE LYS  | 56 | -13.236 | -14.158 | -5.914 | 1.00 | 0.00 |
| ATOM | 881 | HE2 LYS | 56 | -13.189 | -13.930 | -6.979 | 1.00 | 0.00 |
| ATOM | 882 | HE3 LYS | 56 | -12.854 | -15.164 | -5.741 | 1.00 | 0.00 |
| ATOM | 883 | NZ LYS  | 56 | -14.643 | -14.078 | -5.454 | 1.00 | 0.00 |
| ATOM | 884 | HZ1 LYS | 56 | -14.997 | -13.146 | -5.615 | 1.00 | 0.00 |
| ATOM | 885 | HZ2 LYS | 56 | -15.203 | -14.744 | -5.967 | 1.00 | 0.00 |
| ATOM | 886 | HZ3 LYS | 56 | -14.687 | -14.289 | -4.468 | 1.00 | 0.00 |
| ATOM | 887 | C LYS   | 56 | -8.506  | -11.765 | -6.755 | 1.00 | 0.00 |
| ATOM | 888 | O LYS   | 56 | -8.120  | -12.920 | -6.807 | 1.00 | 0.00 |
| ATOM | 889 | N ASN   | 57 | -8.470  | -10.928 | -7.792 | 1.00 | 0.00 |
| ATOM | 890 | H ASN   | 57 | -8.994  | -10.065 | -7.761 | 1.00 | 0.00 |
| ATOM | 891 | CA ASN  | 57 | -7.726  | -11.236 | -8.996 | 1.00 | 0.00 |
| ATOM | 892 | HA ASN  | 57 | -8.159  | -12.108 | -9.485 | 1.00 | 0.00 |
| ATOM | 893 | CB ASN  | 57 | -7.772  | -10.048 | -9.978 | 1.00 | 0.00 |
| ATOM | 894 | HB2 ASN | 57 | -8.076  | -9.128  | -9.479 | 1.00 | 0.00 |

|      |     |          |    |        |         |         |      |      |
|------|-----|----------|----|--------|---------|---------|------|------|
| ATOM | 895 | HB3 ASN  | 57 | -6.755 | -9.937  | -10.354 | 1.00 | 0.00 |
| ATOM | 896 | CG ASN   | 57 | -8.695 | -10.289 | -11.148 | 1.00 | 0.00 |
| ATOM | 897 | OD1 ASN  | 57 | -9.108 | -11.386 | -11.474 | 1.00 | 0.00 |
| ATOM | 898 | ND2 ASN  | 57 | -9.111 | -9.218  | -11.784 | 1.00 | 0.00 |
| ATOM | 899 | HD21 ASN | 57 | -9.731 | -9.313  | -12.576 | 1.00 | 0.00 |
| ATOM | 900 | HD22 ASN | 57 | -8.809 | -8.303  | -11.479 | 1.00 | 0.00 |
| ATOM | 901 | C ASN    | 57 | -6.263 | -11.585 | -8.721  | 1.00 | 0.00 |
| ATOM | 902 | O ASN    | 57 | -5.662 | -12.279 | -9.533  | 1.00 | 0.00 |
| ATOM | 903 | N LEU    | 58 | -5.686 | -10.972 | -7.681  | 1.00 | 0.00 |
| ATOM | 904 | H LEU    | 58 | -6.167 | -10.213 | -7.219  | 1.00 | 0.00 |
| ATOM | 905 | CA LEU   | 58 | -4.336 | -11.275 | -7.272  | 1.00 | 0.00 |
| ATOM | 906 | HA LEU   | 58 | -3.659 | -11.218 | -8.125  | 1.00 | 0.00 |
| ATOM | 907 | CB LEU   | 58 | -3.882 | -10.253 | -6.216  | 1.00 | 0.00 |
| ATOM | 908 | HB2 LEU  | 58 | -4.773 | -9.992  | -5.645  | 1.00 | 0.00 |
| ATOM | 909 | HB3 LEU  | 58 | -3.164 | -10.749 | -5.563  | 1.00 | 0.00 |
| ATOM | 910 | CG LEU   | 58 | -3.259 | -8.991  | -6.785  | 1.00 | 0.00 |
| ATOM | 911 | HG LEU   | 58 | -4.013 | -8.442  | -7.350  | 1.00 | 0.00 |
| ATOM | 912 | CD1 LEU  | 58 | -2.728 | -8.107  | -5.650  | 1.00 | 0.00 |
| ATOM | 913 | HD11 LEU | 58 | -1.973 | -8.654  | -5.085  | 1.00 | 0.00 |
| ATOM | 914 | HD12 LEU | 58 | -2.283 | -7.204  | -6.070  | 1.00 | 0.00 |
| ATOM | 915 | HD13 LEU | 58 | -3.549 | -7.832  | -4.988  | 1.00 | 0.00 |
| ATOM | 916 | CD2 LEU  | 58 | -2.135 | -9.336  | -7.717  | 1.00 | 0.00 |

|      |     |      |     |    |        |         |        |      |      |
|------|-----|------|-----|----|--------|---------|--------|------|------|
| ATOM | 917 | HD21 | LEU | 58 | -2.516 | -9.944  | -8.538 | 1.00 | 0.00 |
| ATOM | 918 | HD22 | LEU | 58 | -1.699 | -8.420  | -8.117 | 1.00 | 0.00 |
| ATOM | 919 | HD23 | LEU | 58 | -1.372 | -9.894  | -7.176 | 1.00 | 0.00 |
| ATOM | 920 | C    | LEU | 58 | -4.202 | -12.729 | -6.800 | 1.00 | 0.00 |
| ATOM | 921 | O    | LEU | 58 | -5.112 | -13.548 | -6.896 | 1.00 | 0.00 |
| ATOM | 922 | N    | ASP | 59 | -3.027 | -13.059 | -6.287 | 1.00 | 0.00 |
| ATOM | 923 | H    | ASP | 59 | -2.281 | -12.379 | -6.236 | 1.00 | 0.00 |
| ATOM | 924 | CA   | ASP | 59 | -2.775 | -14.390 | -5.791 | 1.00 | 0.00 |
| ATOM | 925 | HA   | ASP | 59 | -3.452 | -15.098 | -6.267 | 1.00 | 0.00 |
| ATOM | 926 | CB   | ASP | 59 | -1.340 | -14.804 | -6.101 | 1.00 | 0.00 |
| ATOM | 927 | HB2  | ASP | 59 | -0.799 | -14.043 | -5.539 | 1.00 | 0.00 |
| ATOM | 928 | HB3  | ASP | 59 | -1.059 | -15.792 | -5.738 | 1.00 | 0.00 |
| ATOM | 929 | CG   | ASP | 59 | -0.989 | -14.688 | -7.581 | 1.00 | 0.00 |
| ATOM | 930 | OD1  | ASP | 59 | -1.750 | -15.236 | -8.397 | 1.00 | 0.00 |
| ATOM | 931 | OD2  | ASP | 59 | 0.134  | -14.208 | -7.840 | 1.00 | 0.00 |
| ATOM | 932 | C    | ASP | 59 | -2.989 | -14.417 | -4.291 | 1.00 | 0.00 |
| ATOM | 933 | O    | ASP | 59 | -2.659 | -13.453 | -3.597 | 1.00 | 0.00 |
| ATOM | 934 | N    | GLU | 60 | -3.231 | -15.608 | -3.748 | 1.00 | 0.00 |
| ATOM | 935 | H    | GLU | 60 | -3.300 | -16.424 | -4.339 | 1.00 | 0.00 |
| ATOM | 936 | CA   | GLU | 60 | -3.429 | -15.775 | -2.308 | 1.00 | 0.00 |
| ATOM | 937 | HA   | GLU | 60 | -4.092 | -14.995 | -1.934 | 1.00 | 0.00 |
| ATOM | 938 | CB   | GLU | 60 | -4.059 | -17.141 | -2.007 | 1.00 | 0.00 |

|      |     |     |     |    |        |         |        |      |      |
|------|-----|-----|-----|----|--------|---------|--------|------|------|
| ATOM | 939 | HB2 | GLU | 60 | -4.412 | -17.584 | -2.938 | 1.00 | 0.00 |
| ATOM | 940 | HB3 | GLU | 60 | -3.307 | -17.790 | -1.558 | 1.00 | 0.00 |
| ATOM | 941 | CG  | GLU | 60 | -5.238 | -16.978 | -1.039 | 1.00 | 0.00 |
| ATOM | 942 | HG2 | GLU | 60 | -4.956 | -16.207 | -0.321 | 1.00 | 0.00 |
| ATOM | 943 | HG3 | GLU | 60 | -6.133 | -16.663 | -1.576 | 1.00 | 0.00 |
| ATOM | 944 | CD  | GLU | 60 | -5.521 | -18.289 | -0.297 | 1.00 | 0.00 |
| ATOM | 945 | OE1 | GLU | 60 | -4.908 | -18.481 | 0.778  | 1.00 | 0.00 |
| ATOM | 946 | OE2 | GLU | 60 | -6.310 | -19.094 | -0.836 | 1.00 | 0.00 |
| ATOM | 947 | C   | GLU | 60 | -2.095 | -15.656 | -1.571 | 1.00 | 0.00 |
| ATOM | 948 | O   | GLU | 60 | -2.032 | -15.311 | -0.396 | 1.00 | 0.00 |
| ATOM | 949 | N   | LYS | 61 | -0.995 | -15.901 | -2.291 | 1.00 | 0.00 |
| ATOM | 950 | H   | LYS | 61 | -1.089 | -16.278 | -3.223 | 1.00 | 0.00 |
| ATOM | 951 | CA  | LYS | 61 | 0.330  | -15.732 | -1.753 | 1.00 | 0.00 |
| ATOM | 952 | HA  | LYS | 61 | 0.319  | -15.850 | -0.670 | 1.00 | 0.00 |
| ATOM | 953 | CB  | LYS | 61 | 1.256  | -16.792 | -2.351 | 1.00 | 0.00 |
| ATOM | 954 | HB2 | LYS | 61 | 2.162  | -16.833 | -1.746 | 1.00 | 0.00 |
| ATOM | 955 | HB3 | LYS | 61 | 0.746  | -17.754 | -2.307 | 1.00 | 0.00 |
| ATOM | 956 | CG  | LYS | 61 | 1.628  | -16.477 | -3.806 | 1.00 | 0.00 |
| ATOM | 957 | HG2 | LYS | 61 | 0.716  | -16.268 | -4.366 | 1.00 | 0.00 |
| ATOM | 958 | HG3 | LYS | 61 | 2.273  | -15.598 | -3.823 | 1.00 | 0.00 |
| ATOM | 959 | CD  | LYS | 61 | 2.361  | -17.659 | -4.448 | 1.00 | 0.00 |
| ATOM | 960 | HD2 | LYS | 61 | 3.289  | -17.300 | -4.894 | 1.00 | 0.00 |

|      |     |         |    |        |         |        |      |      |
|------|-----|---------|----|--------|---------|--------|------|------|
| ATOM | 961 | HD3 LYS | 61 | 2.589  | -18.395 | -3.678 | 1.00 | 0.00 |
| ATOM | 962 | CE LYS  | 61 | 1.490  | -18.307 | -5.532 | 1.00 | 0.00 |
| ATOM | 963 | HE2 LYS | 61 | 0.833  | -17.548 | -5.958 | 1.00 | 0.00 |
| ATOM | 964 | HE3 LYS | 61 | 2.137  | -18.706 | -6.314 | 1.00 | 0.00 |
| ATOM | 965 | NZ LYS  | 61 | 0.672  | -19.404 | -4.958 | 1.00 | 0.00 |
| ATOM | 966 | HZ1 LYS | 61 | 0.073  | -19.033 | -4.235 | 1.00 | 0.00 |
| ATOM | 967 | HZ2 LYS | 61 | 0.106  | -19.817 | -5.686 | 1.00 | 0.00 |
| ATOM | 968 | HZ3 LYS | 61 | 1.281  | -20.107 | -4.564 | 1.00 | 0.00 |
| ATOM | 969 | C LYS   | 61 | 0.817  | -14.328 | -2.001 | 1.00 | 0.00 |
| ATOM | 970 | O LYS   | 61 | 1.883  | -14.035 | -1.515 | 1.00 | 0.00 |
| ATOM | 971 | N CYX   | 62 | 0.135  | -13.514 | -2.800 | 1.00 | 0.00 |
| ATOM | 972 | H CYX   | 62 | -0.649 | -13.908 | -3.300 | 1.00 | 0.00 |
| ATOM | 973 | CA CYX  | 62 | 0.467  | -12.127 | -3.032 | 1.00 | 0.00 |
| ATOM | 974 | HA CYX  | 62 | 1.496  | -11.925 | -2.736 | 1.00 | 0.00 |
| ATOM | 975 | CB CYX  | 62 | 0.321  | -11.825 | -4.509 | 1.00 | 0.00 |
| ATOM | 976 | HB2 CYX | 62 | -0.630 | -12.218 | -4.869 | 1.00 | 0.00 |
| ATOM | 977 | HB3 CYX | 62 | 0.350  | -10.746 | -4.665 | 1.00 | 0.00 |
| ATOM | 978 | SG CYX  | 62 | 1.615  | -12.573 | -5.536 | 1.00 | 0.00 |
| ATOM | 979 | C CYX   | 62 | -0.442 | -11.233 | -2.186 | 1.00 | 0.00 |
| ATOM | 980 | O CYX   | 62 | -0.130 | -10.081 | -1.913 | 1.00 | 0.00 |
| ATOM | 981 | N MET   | 63 | -1.496 | -11.771 | -1.607 | 1.00 | 0.00 |
| ATOM | 982 | H MET   | 63 | -1.691 | -12.750 | -1.760 | 1.00 | 0.00 |

|      |      |     |     |    |        |         |        |      |      |
|------|------|-----|-----|----|--------|---------|--------|------|------|
| ATOM | 983  | CA  | MET | 63 | -2.407 | -11.013 | -0.794 | 1.00 | 0.00 |
| ATOM | 984  | HA  | MET | 63 | -2.498 | -9.992  | -1.165 | 1.00 | 0.00 |
| ATOM | 985  | CB  | MET | 63 | -3.765 | -11.672 | -0.854 | 1.00 | 0.00 |
| ATOM | 986  | HB2 | MET | 63 | -3.623 | -12.744 | -0.718 | 1.00 | 0.00 |
| ATOM | 987  | HB3 | MET | 63 | -4.364 | -11.278 | -0.034 | 1.00 | 0.00 |
| ATOM | 988  | CG  | MET | 63 | -4.481 | -11.420 | -2.169 | 1.00 | 0.00 |
| ATOM | 989  | HG2 | MET | 63 | -5.124 | -10.549 | -2.043 | 1.00 | 0.00 |
| ATOM | 990  | HG3 | MET | 63 | -3.729 | -11.208 | -2.930 | 1.00 | 0.00 |
| ATOM | 991  | SD  | MET | 63 | -5.481 | -12.825 | -2.699 | 1.00 | 0.00 |
| ATOM | 992  | CE  | MET | 63 | -6.339 | -13.203 | -1.168 | 1.00 | 0.00 |
| ATOM | 993  | HE1 | MET | 63 | -6.924 | -12.338 | -0.856 | 1.00 | 0.00 |
| ATOM | 994  | HE2 | MET | 63 | -7.003 | -14.053 | -1.324 | 1.00 | 0.00 |
| ATOM | 995  | HE3 | MET | 63 | -5.611 | -13.447 | -0.394 | 1.00 | 0.00 |
| ATOM | 996  | C   | MET | 63 | -1.871 | -10.961 | 0.612  | 1.00 | 0.00 |
| ATOM | 997  | O   | MET | 63 | -2.449 | -11.471 | 1.529  | 1.00 | 0.00 |
| ATOM | 998  | N   | CYX | 64 | -0.727 | -10.374 | 0.855  | 1.00 | 0.00 |
| ATOM | 999  | H   | CYX | 64 | -0.230 | -9.991  | 0.062  | 1.00 | 0.00 |
| ATOM | 1000 | CA  | CYX | 64 | -0.097 | -10.301 | 2.165  | 1.00 | 0.00 |
| ATOM | 1001 | HA  | CYX | 64 | -0.671 | -9.609  | 2.781  | 1.00 | 0.00 |
| ATOM | 1002 | CB  | CYX | 64 | -0.021 | -11.660 | 2.889  | 1.00 | 0.00 |
| ATOM | 1003 | HB2 | CYX | 64 | -0.838 | -11.736 | 3.606  | 1.00 | 0.00 |
| ATOM | 1004 | HB3 | CYX | 64 | -0.103 | -12.465 | 2.159  | 1.00 | 0.00 |

|      |      |     |     |    |       |         |        |      |      |
|------|------|-----|-----|----|-------|---------|--------|------|------|
| ATOM | 1005 | SG  | CYX | 64 | 1.521 | -11.974 | 3.841  | 1.00 | 0.00 |
| ATOM | 1006 | C   | CYX | 64 | 1.277 | -9.706  | 1.982  | 1.00 | 0.00 |
| ATOM | 1007 | O   | CYX | 64 | 1.539 | -8.630  | 2.521  | 1.00 | 0.00 |
| ATOM | 1008 | N   | PRO | 65 | 2.128 | -10.372 | 1.180  | 1.00 | 0.00 |
| ATOM | 1009 | CD  | PRO | 65 | 1.869 | -11.621 | 0.476  | 1.00 | 0.00 |
| ATOM | 1010 | HD2 | PRO | 65 | 1.130 | -11.414 | -0.298 | 1.00 | 0.00 |
| ATOM | 1011 | HD3 | PRO | 65 | 1.453 | -12.324 | 1.197  | 1.00 | 0.00 |
| ATOM | 1012 | CG  | PRO | 65 | 3.190 | -12.091 | -0.093 | 1.00 | 0.00 |
| ATOM | 1013 | HG2 | PRO | 65 | 3.122 | -12.102 | -1.181 | 1.00 | 0.00 |
| ATOM | 1014 | HG3 | PRO | 65 | 3.391 | -13.099 | 0.268  | 1.00 | 0.00 |
| ATOM | 1015 | CB  | PRO | 65 | 4.252 | -11.125 | 0.384  | 1.00 | 0.00 |
| ATOM | 1016 | HB2 | PRO | 65 | 4.853 | -10.819 | -0.473 | 1.00 | 0.00 |
| ATOM | 1017 | HB3 | PRO | 65 | 4.902 | -11.542 | 1.153  | 1.00 | 0.00 |
| ATOM | 1018 | CA  | PRO | 65 | 3.488 | -9.916  | 0.943  | 1.00 | 0.00 |
| ATOM | 1019 | HA  | PRO | 65 | 3.924 | -9.596  | 1.889  | 1.00 | 0.00 |
| ATOM | 1020 | C   | PRO | 65 | 3.499 | -8.751  | -0.040 | 1.00 | 0.00 |
| ATOM | 1021 | O   | PRO | 65 | 4.304 | -7.841  | 0.100  | 1.00 | 0.00 |
| ATOM | 1022 | N   | ALA | 66 | 2.587 | -8.769  | -1.012 | 1.00 | 0.00 |
| ATOM | 1023 | H   | ALA | 66 | 1.962 | -9.558  | -1.093 | 1.00 | 0.00 |
| ATOM | 1024 | CA  | ALA | 66 | 2.473 | -7.714  | -1.969 | 1.00 | 0.00 |
| ATOM | 1025 | HA  | ALA | 66 | 3.443 | -7.440  | -2.386 | 1.00 | 0.00 |
| ATOM | 1026 | CB  | ALA | 66 | 1.562 | -8.137  | -3.101 | 1.00 | 0.00 |



|      |      |      |     |    |        |        |        |      |      |
|------|------|------|-----|----|--------|--------|--------|------|------|
| ATOM | 1027 | HB1  | ALA | 66 | 0.585  | -8.405 | -2.701 | 1.00 | 0.00 |
| ATOM | 1028 | HB2  | ALA | 66 | 1.452  | -7.313 | -3.807 | 1.00 | 0.00 |
| ATOM | 1029 | HB3  | ALA | 66 | 1.993  | -8.997 | -3.613 | 1.00 | 0.00 |
| ATOM | 1030 | C    | ALA | 66 | 1.926  | -6.501 | -1.277 | 1.00 | 0.00 |
| ATOM | 1031 | O    | ALA | 66 | 2.531  | -5.470 | -1.424 | 1.00 | 0.00 |
| ATOM | 1032 | N    | ILE | 67 | 0.844  | -6.603 | -0.510 | 1.00 | 0.00 |
| ATOM | 1033 | H    | ILE | 67 | 0.412  | -7.511 | -0.421 | 1.00 | 0.00 |
| ATOM | 1034 | CA   | ILE | 67 | 0.245  | -5.484 | 0.196  | 1.00 | 0.00 |
| ATOM | 1035 | HA   | ILE | 67 | -0.335 | -4.819 | -0.445 | 1.00 | 0.00 |
| ATOM | 1036 | CB   | ILE | 67 | -0.633 | -5.987 | 1.333  | 1.00 | 0.00 |
| ATOM | 1037 | HB   | ILE | 67 | -0.094 | -6.756 | 1.884  | 1.00 | 0.00 |
| ATOM | 1038 | CG2  | ILE | 67 | -0.993 | -4.830 | 2.285  | 1.00 | 0.00 |
| ATOM | 1039 | HG21 | ILE | 67 | -1.532 | -4.059 | 1.733  | 1.00 | 0.00 |
| ATOM | 1040 | HG22 | ILE | 67 | -1.621 | -5.205 | 3.092  | 1.00 | 0.00 |
| ATOM | 1041 | HG23 | ILE | 67 | -0.080 | -4.405 | 2.702  | 1.00 | 0.00 |
| ATOM | 1042 | CG1  | ILE | 67 | -1.863 | -6.717 | 0.760  | 1.00 | 0.00 |
| ATOM | 1043 | HG12 | ILE | 67 | -1.933 | -6.480 | -0.302 | 1.00 | 0.00 |
| ATOM | 1044 | HG13 | ILE | 67 | -1.709 | -7.789 | 0.883  | 1.00 | 0.00 |
| ATOM | 1045 | CD1  | ILE | 67 | -3.155 | -6.306 | 1.459  | 1.00 | 0.00 |
| ATOM | 1046 | HD11 | ILE | 67 | -3.310 | -5.234 | 1.335  | 1.00 | 0.00 |
| ATOM | 1047 | HD12 | ILE | 67 | -3.994 | -6.846 | 1.020  | 1.00 | 0.00 |
| ATOM | 1048 | HD13 | ILE | 67 | -3.085 | -6.542 | 2.520  | 1.00 | 0.00 |

|      |      |     |     |    |       |        |        |      |      |
|------|------|-----|-----|----|-------|--------|--------|------|------|
| ATOM | 1049 | C   | ILE | 67 | 1.332 | -4.586 | 0.764  | 1.00 | 0.00 |
| ATOM | 1050 | O   | ILE | 67 | 1.362 | -3.418 | 0.494  | 1.00 | 0.00 |
| ATOM | 1051 | N   | MET | 68 | 2.284 | -5.089 | 1.517  | 1.00 | 0.00 |
| ATOM | 1052 | H   | MET | 68 | 2.255 | -6.069 | 1.759  | 1.00 | 0.00 |
| ATOM | 1053 | CA  | MET | 68 | 3.383 | -4.285 | 2.029  | 1.00 | 0.00 |
| ATOM | 1054 | HA  | MET | 68 | 3.044 | -3.635 | 2.836  | 1.00 | 0.00 |
| ATOM | 1055 | CB  | MET | 68 | 4.445 | -5.215 | 2.571  | 1.00 | 0.00 |
| ATOM | 1056 | HB2 | MET | 68 | 4.769 | -5.877 | 1.768  | 1.00 | 0.00 |
| ATOM | 1057 | HB3 | MET | 68 | 5.290 | -4.616 | 2.911  | 1.00 | 0.00 |
| ATOM | 1058 | CG  | MET | 68 | 3.913 | -6.047 | 3.731  | 1.00 | 0.00 |
| ATOM | 1059 | HG2 | MET | 68 | 4.122 | -5.530 | 4.667  | 1.00 | 0.00 |
| ATOM | 1060 | HG3 | MET | 68 | 2.836 | -6.172 | 3.617  | 1.00 | 0.00 |
| ATOM | 1061 | SD  | MET | 68 | 4.701 | -7.675 | 3.761  | 1.00 | 0.00 |
| ATOM | 1062 | CE  | MET | 68 | 3.532 | -8.538 | 4.829  | 1.00 | 0.00 |
| ATOM | 1063 | HE1 | MET | 68 | 2.543 | -8.525 | 4.370  | 1.00 | 0.00 |
| ATOM | 1064 | HE2 | MET | 68 | 3.856 | -9.569 | 4.964  | 1.00 | 0.00 |
| ATOM | 1065 | HE3 | MET | 68 | 3.489 | -8.041 | 5.798  | 1.00 | 0.00 |
| ATOM | 1066 | C   | MET | 68 | 4.007 | -3.400 | 0.966  | 1.00 | 0.00 |
| ATOM | 1067 | O   | MET | 68 | 3.896 | -2.182 | 1.112  | 1.00 | 0.00 |
| ATOM | 1068 | N   | MET | 69 | 4.461 | -4.021 | -0.136 | 1.00 | 0.00 |
| ATOM | 1069 | H   | MET | 69 | 4.490 | -5.030 | -0.143 | 1.00 | 0.00 |
| ATOM | 1070 | CA  | MET | 69 | 4.963 | -3.314 | -1.292 | 1.00 | 0.00 |

|      |      |     |     |    |        |        |        |      |      |
|------|------|-----|-----|----|--------|--------|--------|------|------|
| ATOM | 1071 | HA  | MET | 69 | 5.837  | -2.721 | -1.023 | 1.00 | 0.00 |
| ATOM | 1072 | CB  | MET | 69 | 5.366  | -4.315 | -2.363 | 1.00 | 0.00 |
| ATOM | 1073 | HB2 | MET | 69 | 4.636  | -5.124 | -2.369 | 1.00 | 0.00 |
| ATOM | 1074 | HB3 | MET | 69 | 5.354  | -3.808 | -3.329 | 1.00 | 0.00 |
| ATOM | 1075 | CG  | MET | 69 | 6.746  | -4.882 | -2.108 | 1.00 | 0.00 |
| ATOM | 1076 | HG2 | MET | 69 | 6.784  | -5.300 | -1.103 | 1.00 | 0.00 |
| ATOM | 1077 | HG3 | MET | 69 | 6.953  | -5.667 | -2.836 | 1.00 | 0.00 |
| ATOM | 1078 | SD  | MET | 69 | 7.998  | -3.585 | -2.260 | 1.00 | 0.00 |
| ATOM | 1079 | CE  | MET | 69 | 9.416  | -4.472 | -1.611 | 1.00 | 0.00 |
| ATOM | 1080 | HE1 | MET | 69 | 9.607  | -5.352 | -2.225 | 1.00 | 0.00 |
| ATOM | 1081 | HE2 | MET | 69 | 10.291 | -3.821 | -1.628 | 1.00 | 0.00 |
| ATOM | 1082 | HE3 | MET | 69 | 9.214  | -4.781 | -0.586 | 1.00 | 0.00 |
| ATOM | 1083 | C   | MET | 69 | 3.983  | -2.310 | -1.893 | 1.00 | 0.00 |
| ATOM | 1084 | O   | MET | 69 | 4.384  | -1.282 | -2.430 | 1.00 | 0.00 |
| ATOM | 1085 | N   | MET | 70 | 2.692  | -2.581 | -1.801 | 1.00 | 0.00 |
| ATOM | 1086 | H   | MET | 70 | 2.420  | -3.484 | -1.442 | 1.00 | 0.00 |
| ATOM | 1087 | CA  | MET | 70 | 1.661  | -1.684 | -2.236 | 1.00 | 0.00 |
| ATOM | 1088 | HA  | MET | 70 | 1.707  | -1.538 | -3.316 | 1.00 | 0.00 |
| ATOM | 1089 | CB  | MET | 70 | 0.312  | -2.289 | -1.884 | 1.00 | 0.00 |
| ATOM | 1090 | HB2 | MET | 70 | -0.307 | -2.212 | -2.778 | 1.00 | 0.00 |
| ATOM | 1091 | HB3 | MET | 70 | 0.491  | -3.339 | -1.656 | 1.00 | 0.00 |
| ATOM | 1092 | CG  | MET | 70 | -0.405 | -1.630 | -0.712 | 1.00 | 0.00 |

|      |      |          |    |        |        |        |      |      |
|------|------|----------|----|--------|--------|--------|------|------|
| ATOM | 1093 | HG2 MET  | 70 | 0.351  | -1.450 | 0.052  | 1.00 | 0.00 |
| ATOM | 1094 | HG3 MET  | 70 | -0.785 | -0.676 | -1.078 | 1.00 | 0.00 |
| ATOM | 1095 | SD MET   | 70 | -1.756 | -2.569 | 0.003  | 1.00 | 0.00 |
| ATOM | 1096 | CE MET   | 70 | -2.662 | -1.257 | 0.789  | 1.00 | 0.00 |
| ATOM | 1097 | HE1 MET  | 70 | -2.976 | -0.531 | 0.038  | 1.00 | 0.00 |
| ATOM | 1098 | HE2 MET  | 70 | -3.541 | -1.668 | 1.285  | 1.00 | 0.00 |
| ATOM | 1099 | HE3 MET  | 70 | -2.026 | -0.765 | 1.525  | 1.00 | 0.00 |
| ATOM | 1100 | C MET    | 70 | 1.812  | -0.308 | -1.621 | 1.00 | 0.00 |
| ATOM | 1101 | O MET    | 70 | 1.476  | 0.679  | -2.257 | 1.00 | 0.00 |
| ATOM | 1102 | N LEU    | 71 | 2.238  | -0.258 | -0.356 | 1.00 | 0.00 |
| ATOM | 1103 | H LEU    | 71 | 2.383  | -1.129 | 0.134  | 1.00 | 0.00 |
| ATOM | 1104 | CA LEU   | 71 | 2.390  | 0.976  | 0.380  | 1.00 | 0.00 |
| ATOM | 1105 | HA LEU   | 71 | 1.933  | 1.794  | -0.177 | 1.00 | 0.00 |
| ATOM | 1106 | CB LEU   | 71 | 1.715  | 0.879  | 1.748  | 1.00 | 0.00 |
| ATOM | 1107 | HB2 LEU  | 71 | 2.188  | 0.007  | 2.199  | 1.00 | 0.00 |
| ATOM | 1108 | HB3 LEU  | 71 | 1.947  | 1.765  | 2.339  | 1.00 | 0.00 |
| ATOM | 1109 | CG LEU   | 71 | 0.209  | 0.675  | 1.710  | 1.00 | 0.00 |
| ATOM | 1110 | HG LEU   | 71 | -0.008 | -0.365 | 1.467  | 1.00 | 0.00 |
| ATOM | 1111 | CD1 LEU  | 71 | -0.384 | 1.011  | 3.051  | 1.00 | 0.00 |
| ATOM | 1112 | HD11 LEU | 71 | -0.167 | 2.052  | 3.294  | 1.00 | 0.00 |
| ATOM | 1113 | HD12 LEU | 71 | -1.463 | 0.864  | 3.018  | 1.00 | 0.00 |
| ATOM | 1114 | HD13 LEU | 71 | 0.049  | 0.363  | 3.812  | 1.00 | 0.00 |

|      |      |      |     |    |        |        |        |      |      |
|------|------|------|-----|----|--------|--------|--------|------|------|
| ATOM | 1115 | CD2  | LEU | 71 | -0.489 | 1.462  | 0.607  | 1.00 | 0.00 |
| ATOM | 1116 | HD21 | LEU | 71 | -0.096 | 1.157  | -0.363 | 1.00 | 0.00 |
| ATOM | 1117 | HD22 | LEU | 71 | -1.561 | 1.266  | 0.642  | 1.00 | 0.00 |
| ATOM | 1118 | HD23 | LEU | 71 | -0.310 | 2.528  | 0.751  | 1.00 | 0.00 |
| ATOM | 1119 | C    | LEU | 71 | 3.866  | 1.302  | 0.441  | 1.00 | 0.00 |
| ATOM | 1120 | O    | LEU | 71 | 4.346  | 1.846  | 1.427  | 1.00 | 0.00 |
| ATOM | 1121 | N    | ASN | 72 | 4.613  | 0.901  | -0.575 | 1.00 | 0.00 |
| ATOM | 1122 | H    | ASN | 72 | 4.174  | 0.338  | -1.290 | 1.00 | 0.00 |
| ATOM | 1123 | CA   | ASN | 72 | 6.023  | 1.191  | -0.701 | 1.00 | 0.00 |
| ATOM | 1124 | HA   | ASN | 72 | 6.343  | 1.869  | 0.090  | 1.00 | 0.00 |
| ATOM | 1125 | CB   | ASN | 72 | 6.818  | -0.103 | -0.584 | 1.00 | 0.00 |
| ATOM | 1126 | HB2  | ASN | 72 | 6.531  | -0.898 | -1.272 | 1.00 | 0.00 |
| ATOM | 1127 | HB3  | ASN | 72 | 7.831  | 0.228  | -0.814 | 1.00 | 0.00 |
| ATOM | 1128 | CG   | ASN | 72 | 6.797  | -0.650 | 0.821  | 1.00 | 0.00 |
| ATOM | 1129 | OD1  | ASN | 72 | 6.631  | -1.819 | 1.086  | 1.00 | 0.00 |
| ATOM | 1130 | ND2  | ASN | 72 | 7.136  | 0.161  | 1.790  | 1.00 | 0.00 |
| ATOM | 1131 | HD21 | ASN | 72 | 7.134  | -0.169 | 2.744  | 1.00 | 0.00 |
| ATOM | 1132 | HD22 | ASN | 72 | 7.398  | 1.114  | 1.579  | 1.00 | 0.00 |
| ATOM | 1133 | C    | ASN | 72 | 6.324  | 1.870  | -2.023 | 1.00 | 0.00 |
| ATOM | 1134 | O    | ASN | 72 | 7.488  | 2.111  | -2.332 | 1.00 | 0.00 |
| ATOM | 1135 | N    | GLU | 73 | 5.282  | 2.121  | -2.811 | 1.00 | 0.00 |
| ATOM | 1136 | H    | GLU | 73 | 4.363  | 1.802  | -2.540 | 1.00 | 0.00 |

|      |      |     |     |    |       |       |        |      |      |
|------|------|-----|-----|----|-------|-------|--------|------|------|
| ATOM | 1137 | CA  | GLU | 73 | 5.432 | 2.753 | -4.087 | 1.00 | 0.00 |
| ATOM | 1138 | HA  | GLU | 73 | 6.202 | 2.248 | -4.671 | 1.00 | 0.00 |
| ATOM | 1139 | CB  | GLU | 73 | 4.103 | 2.680 | -4.859 | 1.00 | 0.00 |
| ATOM | 1140 | HB2 | GLU | 73 | 3.341 | 2.239 | -4.217 | 1.00 | 0.00 |
| ATOM | 1141 | HB3 | GLU | 73 | 3.800 | 3.688 | -5.142 | 1.00 | 0.00 |
| ATOM | 1142 | CG  | GLU | 73 | 4.267 | 1.818 | -6.127 | 1.00 | 0.00 |
| ATOM | 1143 | HG2 | GLU | 73 | 5.302 | 1.689 | -6.443 | 1.00 | 0.00 |
| ATOM | 1144 | HG3 | GLU | 73 | 3.863 | 0.858 | -5.806 | 1.00 | 0.00 |
| ATOM | 1145 | CD  | GLU | 73 | 3.439 | 2.353 | -7.299 | 1.00 | 0.00 |
| ATOM | 1146 | OE1 | GLU | 73 | 2.305 | 2.814 | -7.033 | 1.00 | 0.00 |
| ATOM | 1147 | OE2 | GLU | 73 | 4.006 | 2.423 | -8.412 | 1.00 | 0.00 |
| ATOM | 1148 | C   | GLU | 73 | 5.929 | 4.190 | -3.931 | 1.00 | 0.00 |
| ATOM | 1149 | O   | GLU | 73 | 6.054 | 4.718 | -2.813 | 1.00 | 0.00 |
| ATOM | 1150 | N   | PRO | 74 | 6.154 | 4.882 | -5.058 | 1.00 | 0.00 |
| ATOM | 1151 | CD  | PRO | 74 | 5.998 | 4.396 | -6.421 | 1.00 | 0.00 |
| ATOM | 1152 | HD2 | PRO | 74 | 4.934 | 4.211 | -6.570 | 1.00 | 0.00 |
| ATOM | 1153 | HD3 | PRO | 74 | 6.543 | 3.455 | -6.484 | 1.00 | 0.00 |
| ATOM | 1154 | CG  | PRO | 74 | 6.542 | 5.441 | -7.368 | 1.00 | 0.00 |
| ATOM | 1155 | HG2 | PRO | 74 | 5.737 | 5.823 | -7.997 | 1.00 | 0.00 |
| ATOM | 1156 | HG3 | PRO | 74 | 7.315 | 5.000 | -7.998 | 1.00 | 0.00 |
| ATOM | 1157 | CB  | PRO | 74 | 7.121 | 6.534 | -6.483 | 1.00 | 0.00 |
| ATOM | 1158 | HB2 | PRO | 74 | 6.805 | 7.518 | -6.830 | 1.00 | 0.00 |

|      |      |         |    |        |        |        |      |      |
|------|------|---------|----|--------|--------|--------|------|------|
| ATOM | 1159 | HB3 PRO | 74 | 8.210  | 6.486  | -6.474 | 1.00 | 0.00 |
| ATOM | 1160 | CA PRO  | 74 | 6.571  | 6.276  | -5.069 | 1.00 | 0.00 |
| ATOM | 1161 | HA PRO  | 74 | 7.391  | 6.389  | -4.361 | 1.00 | 0.00 |
| ATOM | 1162 | C PRO   | 74 | 5.432  | 7.228  | -4.687 | 1.00 | 0.00 |
| ATOM | 1163 | O PRO   | 74 | 5.271  | 8.298  | -5.274 | 1.00 | 0.00 |
| ATOM | 1164 | N MET   | 75 | 4.657  | 6.859  | -3.675 | 1.00 | 0.00 |
| ATOM | 1165 | H MET   | 75 | 4.851  | 5.978  | -3.222 | 1.00 | 0.00 |
| ATOM | 1166 | CA MET  | 75 | 3.549  | 7.640  | -3.201 | 1.00 | 0.00 |
| ATOM | 1167 | HA MET  | 75 | 3.870  | 8.650  | -2.945 | 1.00 | 0.00 |
| ATOM | 1168 | CB MET  | 75 | 2.503  | 7.727  | -4.314 | 1.00 | 0.00 |
| ATOM | 1169 | HB2 MET | 75 | 3.001  | 7.652  | -5.281 | 1.00 | 0.00 |
| ATOM | 1170 | HB3 MET | 75 | 1.794  | 6.907  | -4.206 | 1.00 | 0.00 |
| ATOM | 1171 | CG MET  | 75 | 1.761  | 9.052  | -4.228 | 1.00 | 0.00 |
| ATOM | 1172 | HG2 MET | 75 | 2.017  | 9.543  | -3.289 | 1.00 | 0.00 |
| ATOM | 1173 | HG3 MET | 75 | 2.065  | 9.685  | -5.063 | 1.00 | 0.00 |
| ATOM | 1174 | SD MET  | 75 | -0.034 | 8.796  | -4.297 | 1.00 | 0.00 |
| ATOM | 1175 | CE MET  | 75 | -0.438 | 9.969  | -5.600 | 1.00 | 0.00 |
| ATOM | 1176 | HE1 MET | 75 | 0.091  | 9.696  | -6.513 | 1.00 | 0.00 |
| ATOM | 1177 | HE2 MET | 75 | -1.512 | 9.953  | -5.785 | 1.00 | 0.00 |
| ATOM | 1178 | HE3 MET | 75 | -0.138 | 10.971 | -5.294 | 1.00 | 0.00 |
| ATOM | 1179 | C MET   | 75 | 2.943  | 6.996  | -1.962 | 1.00 | 0.00 |
| ATOM | 1180 | O MET   | 75 | 1.737  | 7.045  | -1.766 | 1.00 | 0.00 |

|      |      |     |     |    |        |       |        |      |      |
|------|------|-----|-----|----|--------|-------|--------|------|------|
| ATOM | 1181 | N   | TRP | 76 | 3.754  | 6.333 | -1.147 | 1.00 | 0.00 |
| ATOM | 1182 | H   | TRP | 76 | 4.721  | 6.211 | -1.412 | 1.00 | 0.00 |
| ATOM | 1183 | CA  | TRP | 76 | 3.289  | 5.696 | 0.064  | 1.00 | 0.00 |
| ATOM | 1184 | HA  | TRP | 76 | 2.464  | 6.263 | 0.494  | 1.00 | 0.00 |
| ATOM | 1185 | CB  | TRP | 76 | 2.800  | 4.287 | -0.253 | 1.00 | 0.00 |
| ATOM | 1186 | HB2 | TRP | 76 | 3.475  | 3.855 | -0.993 | 1.00 | 0.00 |
| ATOM | 1187 | HB3 | TRP | 76 | 2.789  | 3.660 | 0.638  | 1.00 | 0.00 |
| ATOM | 1188 | CG  | TRP | 76 | 1.425  | 4.223 | -0.839 | 1.00 | 0.00 |
| ATOM | 1189 | CD1 | TRP | 76 | 1.045  | 3.667 | -2.006 | 1.00 | 0.00 |
| ATOM | 1190 | HD1 | TRP | 76 | 1.820  | 3.192 | -2.608 | 1.00 | 0.00 |
| ATOM | 1191 | NE1 | TRP | 76 | -0.311 | 3.836 | -2.183 | 1.00 | 0.00 |
| ATOM | 1192 | HE1 | TRP | 76 | -0.810 | 3.473 | -2.983 | 1.00 | 0.00 |
| ATOM | 1193 | CE2 | TRP | 76 | -0.869 | 4.531 | -1.149 | 1.00 | 0.00 |
| ATOM | 1194 | CZ2 | TRP | 76 | -2.164 | 4.942 | -0.870 | 1.00 | 0.00 |
| ATOM | 1195 | HZ2 | TRP | 76 | -2.950 | 4.712 | -1.589 | 1.00 | 0.00 |
| ATOM | 1196 | CH2 | TRP | 76 | -2.376 | 5.631 | 0.325  | 1.00 | 0.00 |
| ATOM | 1197 | HH2 | TRP | 76 | -3.386 | 5.957 | 0.572  | 1.00 | 0.00 |
| ATOM | 1198 | CZ3 | TRP | 76 | -1.339 | 5.916 | 1.210  | 1.00 | 0.00 |
| ATOM | 1199 | HZ3 | TRP | 76 | -1.502 | 6.470 | 2.134  | 1.00 | 0.00 |
| ATOM | 1200 | CE3 | TRP | 76 | -0.046 | 5.490 | 0.923  | 1.00 | 0.00 |
| ATOM | 1201 | HE3 | TRP | 76 | 0.719  | 5.695 | 1.671  | 1.00 | 0.00 |
| ATOM | 1202 | CD2 | TRP | 76 | 0.218  | 4.795 | -0.275 | 1.00 | 0.00 |



|      |      |      |     |    |       |       |        |      |      |
|------|------|------|-----|----|-------|-------|--------|------|------|
| ATOM | 1203 | C    | TRP | 76 | 4.393 | 5.721 | 1.098  | 1.00 | 0.00 |
| ATOM | 1204 | O    | TRP | 76 | 5.164 | 4.773 | 1.230  | 1.00 | 0.00 |
| ATOM | 1205 | N    | ILE | 77 | 4.516 | 6.840 | 1.815  | 1.00 | 0.00 |
| ATOM | 1206 | H    | ILE | 77 | 3.861 | 7.591 | 1.650  | 1.00 | 0.00 |
| ATOM | 1207 | CA   | ILE | 77 | 5.618 | 7.073 | 2.749  | 1.00 | 0.00 |
| ATOM | 1208 | HA   | ILE | 77 | 6.218 | 6.175 | 2.893  | 1.00 | 0.00 |
| ATOM | 1209 | CB   | ILE | 77 | 6.533 | 8.239 | 2.335  | 1.00 | 0.00 |
| ATOM | 1210 | HB   | ILE | 77 | 6.113 | 9.177 | 2.700  | 1.00 | 0.00 |
| ATOM | 1211 | CG2  | ILE | 77 | 7.935 | 8.036 | 2.937  | 1.00 | 0.00 |
| ATOM | 1212 | HG21 | ILE | 77 | 8.356 | 7.100 | 2.571  | 1.00 | 0.00 |
| ATOM | 1213 | HG22 | ILE | 77 | 8.581 | 8.864 | 2.642  | 1.00 | 0.00 |
| ATOM | 1214 | HG23 | ILE | 77 | 7.863 | 8.002 | 4.024  | 1.00 | 0.00 |
| ATOM | 1215 | CG1  | ILE | 77 | 6.585 | 8.432 | 0.818  | 1.00 | 0.00 |
| ATOM | 1216 | HG12 | ILE | 77 | 5.599 | 8.757 | 0.486  | 1.00 | 0.00 |
| ATOM | 1217 | HG13 | ILE | 77 | 7.315 | 9.212 | 0.602  | 1.00 | 0.00 |
| ATOM | 1218 | CD1  | ILE | 77 | 6.975 | 7.151 | 0.079  | 1.00 | 0.00 |
| ATOM | 1219 | HD11 | ILE | 77 | 6.245 | 6.371 | 0.293  | 1.00 | 0.00 |
| ATOM | 1220 | HD12 | ILE | 77 | 6.997 | 7.343 | -0.994 | 1.00 | 0.00 |
| ATOM | 1221 | HD13 | ILE | 77 | 7.961 | 6.826 | 0.410  | 1.00 | 0.00 |
| ATOM | 1222 | C    | ILE | 77 | 5.029 | 7.265 | 4.116  | 1.00 | 0.00 |
| ATOM | 1223 | O    | ILE | 77 | 4.090 | 6.593 | 4.480  | 1.00 | 0.00 |
| ATOM | 1224 | N    | ARG | 78 | 5.526 | 8.177 | 4.921  | 1.00 | 0.00 |

|      |      |      |     |    |        |        |       |      |      |
|------|------|------|-----|----|--------|--------|-------|------|------|
| ATOM | 1225 | H    | ARG | 78 | 6.308  | 8.723  | 4.589 | 1.00 | 0.00 |
| ATOM | 1226 | CA   | ARG | 78 | 4.999  | 8.465  | 6.226 | 1.00 | 0.00 |
| ATOM | 1227 | HA   | ARG | 78 | 5.221  | 7.637  | 6.898 | 1.00 | 0.00 |
| ATOM | 1228 | CB   | ARG | 78 | 5.611  | 9.731  | 6.798 | 1.00 | 0.00 |
| ATOM | 1229 | HB2  | ARG | 78 | 5.871  | 10.403 | 5.979 | 1.00 | 0.00 |
| ATOM | 1230 | HB3  | ARG | 78 | 4.883  | 10.217 | 7.448 | 1.00 | 0.00 |
| ATOM | 1231 | CG   | ARG | 78 | 6.867  | 9.397  | 7.600 | 1.00 | 0.00 |
| ATOM | 1232 | HG2  | ARG | 78 | 6.856  | 9.968  | 8.528 | 1.00 | 0.00 |
| ATOM | 1233 | HG3  | ARG | 78 | 6.867  | 8.332  | 7.828 | 1.00 | 0.00 |
| ATOM | 1234 | CD   | ARG | 78 | 8.124  | 9.747  | 6.803 | 1.00 | 0.00 |
| ATOM | 1235 | HD2  | ARG | 78 | 8.042  | 9.338  | 5.796 | 1.00 | 0.00 |
| ATOM | 1236 | HD3  | ARG | 78 | 8.229  | 10.831 | 6.746 | 1.00 | 0.00 |
| ATOM | 1237 | NE   | ARG | 78 | 9.325  | 9.190  | 7.441 | 1.00 | 0.00 |
| ATOM | 1238 | HE   | ARG | 78 | 9.175  | 8.675  | 8.296 | 1.00 | 0.00 |
| ATOM | 1239 | CZ   | ARG | 78 | 10.561 | 9.342  | 7.006 | 1.00 | 0.00 |
| ATOM | 1240 | NH1  | ARG | 78 | 10.805 | 10.006 | 5.906 | 1.00 | 0.00 |
| ATOM | 1241 | HH11 | ARG | 78 | 10.041 | 10.408 | 5.382 | 1.00 | 0.00 |
| ATOM | 1242 | HH12 | ARG | 78 | 11.757 | 10.114 | 5.585 | 1.00 | 0.00 |
| ATOM | 1243 | NH2  | ARG | 78 | 11.561 | 8.797  | 7.649 | 1.00 | 0.00 |
| ATOM | 1244 | HH21 | ARG | 78 | 11.386 | 8.257  | 8.483 | 1.00 | 0.00 |
| ATOM | 1245 | HH22 | ARG | 78 | 12.504 | 8.920  | 7.307 | 1.00 | 0.00 |
| ATOM | 1246 | C    | ARG | 78 | 3.520  | 8.705  | 6.208 | 1.00 | 0.00 |

|      |      |     |     |    |        |        |        |      |      |
|------|------|-----|-----|----|--------|--------|--------|------|------|
| ATOM | 1247 | O   | ARG | 78 | 2.917  | 8.286  | 7.168  | 1.00 | 0.00 |
| ATOM | 1248 | N   | MET | 79 | 2.967  | 9.241  | 5.124  | 1.00 | 0.00 |
| ATOM | 1249 | H   | MET | 79 | 3.596  | 9.549  | 4.396  | 1.00 | 0.00 |
| ATOM | 1250 | CA  | MET | 79 | 1.545  | 9.393  | 4.910  | 1.00 | 0.00 |
| ATOM | 1251 | HA  | MET | 79 | 1.162  | 10.181 | 5.558  | 1.00 | 0.00 |
| ATOM | 1252 | CB  | MET | 79 | 1.244  | 9.764  | 3.462  | 1.00 | 0.00 |
| ATOM | 1253 | HB2 | MET | 79 | 0.172  | 9.657  | 3.296  | 1.00 | 0.00 |
| ATOM | 1254 | HB3 | MET | 79 | 1.533  | 10.804 | 3.307  | 1.00 | 0.00 |
| ATOM | 1255 | CG  | MET | 79 | 2.005  | 8.870  | 2.475  | 1.00 | 0.00 |
| ATOM | 1256 | HG2 | MET | 79 | 2.727  | 8.300  | 3.059  | 1.00 | 0.00 |
| ATOM | 1257 | HG3 | MET | 79 | 1.274  | 8.190  | 2.038  | 1.00 | 0.00 |
| ATOM | 1258 | SD  | MET | 79 | 2.857  | 9.730  | 1.170  | 1.00 | 0.00 |
| ATOM | 1259 | CE  | MET | 79 | 1.772  | 9.323  | -0.190 | 1.00 | 0.00 |
| ATOM | 1260 | HE1 | MET | 79 | 0.771  | 9.700  | 0.018  | 1.00 | 0.00 |
| ATOM | 1261 | HE2 | MET | 79 | 2.149  | 9.781  | -1.106 | 1.00 | 0.00 |
| ATOM | 1262 | HE3 | MET | 79 | 1.734  | 8.241  | -0.314 | 1.00 | 0.00 |
| ATOM | 1263 | C   | MET | 79 | 0.803  | 8.113  | 5.194  | 1.00 | 0.00 |
| ATOM | 1264 | O   | MET | 79 | -0.313 | 8.167  | 5.630  | 1.00 | 0.00 |
| ATOM | 1265 | N   | ARG | 80 | 1.418  | 6.945  | 5.076  | 1.00 | 0.00 |
| ATOM | 1266 | H   | ARG | 80 | 2.314  | 6.946  | 4.609  | 1.00 | 0.00 |
| ATOM | 1267 | CA  | ARG | 80 | 0.869  | 5.698  | 5.478  | 1.00 | 0.00 |
| ATOM | 1268 | HA  | ARG | 80 | -0.060 | 5.536  | 4.931  | 1.00 | 0.00 |

|      |      |      |     |    |        |       |       |      |      |
|------|------|------|-----|----|--------|-------|-------|------|------|
| ATOM | 1269 | CB   | ARG | 80 | 1.791  | 4.537 | 5.214 | 1.00 | 0.00 |
| ATOM | 1270 | HB2  | ARG | 80 | 2.709  | 4.681 | 5.784 | 1.00 | 0.00 |
| ATOM | 1271 | HB3  | ARG | 80 | 1.302  | 3.619 | 5.539 | 1.00 | 0.00 |
| ATOM | 1272 | CG   | ARG | 80 | 2.126  | 4.436 | 3.730 | 1.00 | 0.00 |
| ATOM | 1273 | HG2  | ARG | 80 | 1.296  | 3.967 | 3.202 | 1.00 | 0.00 |
| ATOM | 1274 | HG3  | ARG | 80 | 2.294  | 5.435 | 3.327 | 1.00 | 0.00 |
| ATOM | 1275 | CD   | ARG | 80 | 3.385  | 3.596 | 3.545 | 1.00 | 0.00 |
| ATOM | 1276 | HD2  | ARG | 80 | 3.116  | 2.556 | 3.723 | 1.00 | 0.00 |
| ATOM | 1277 | HD3  | ARG | 80 | 3.711  | 3.715 | 2.511 | 1.00 | 0.00 |
| ATOM | 1278 | NE   | ARG | 80 | 4.494  | 3.951 | 4.429 | 1.00 | 0.00 |
| ATOM | 1279 | HE   | ARG | 80 | 4.438  | 4.899 | 4.773 | 1.00 | 0.00 |
| ATOM | 1280 | CZ   | ARG | 80 | 5.505  | 3.215 | 4.796 | 1.00 | 0.00 |
| ATOM | 1281 | NH1  | ARG | 80 | 5.620  | 2.004 | 4.342 | 1.00 | 0.00 |
| ATOM | 1282 | HH11 | ARG | 80 | 4.926  | 1.639 | 3.706 | 1.00 | 0.00 |
| ATOM | 1283 | HH12 | ARG | 80 | 6.404  | 1.434 | 4.626 | 1.00 | 0.00 |
| ATOM | 1284 | NH2  | ARG | 80 | 6.395  | 3.693 | 5.629 | 1.00 | 0.00 |
| ATOM | 1285 | HH21 | ARG | 80 | 6.295  | 4.633 | 5.985 | 1.00 | 0.00 |
| ATOM | 1286 | HH22 | ARG | 80 | 7.177  | 3.120 | 5.911 | 1.00 | 0.00 |
| ATOM | 1287 | C    | ARG | 80 | 0.474  | 5.722 | 6.916 | 1.00 | 0.00 |
| ATOM | 1288 | O    | ARG | 80 | -0.244 | 4.836 | 7.232 | 1.00 | 0.00 |
| ATOM | 1289 | N    | ASP | 81 | 0.812  | 6.671 | 7.756 | 1.00 | 0.00 |
| ATOM | 1290 | H    | ASP | 81 | 1.352  | 7.414 | 7.335 | 1.00 | 0.00 |

|      |      |     |     |    |        |        |        |      |      |
|------|------|-----|-----|----|--------|--------|--------|------|------|
| ATOM | 1291 | CA  | ASP | 81 | 0.482  | 6.774  | 9.163  | 1.00 | 0.00 |
| ATOM | 1292 | HA  | ASP | 81 | 1.218  | 6.244  | 9.767  | 1.00 | 0.00 |
| ATOM | 1293 | CB  | ASP | 81 | 0.485  | 8.244  | 9.570  | 1.00 | 0.00 |
| ATOM | 1294 | HB2 | ASP | 81 | 1.283  | 8.734  | 9.010  | 1.00 | 0.00 |
| ATOM | 1295 | HB3 | ASP | 81 | -0.473 | 8.688  | 9.299  | 1.00 | 0.00 |
| ATOM | 1296 | CG  | ASP | 81 | 0.726  | 8.428  | 11.065 | 1.00 | 0.00 |
| ATOM | 1297 | OD1 | ASP | 81 | 0.982  | 7.424  | 11.763 | 1.00 | 0.00 |
| ATOM | 1298 | OD2 | ASP | 81 | 0.629  | 9.591  | 11.497 | 1.00 | 0.00 |
| ATOM | 1299 | C   | ASP | 81 | -0.913 | 6.216  | 9.444  | 1.00 | 0.00 |
| ATOM | 1300 | O   | ASP | 81 | -1.089 | 5.246  | 10.175 | 1.00 | 0.00 |
| ATOM | 1301 | N   | GLN | 82 | -1.892 | 6.702  | 8.670  | 1.00 | 0.00 |
| ATOM | 1302 | H   | GLN | 82 | -1.687 | 7.448  | 8.020  | 1.00 | 0.00 |
| ATOM | 1303 | CA  | GLN | 82 | -3.248 | 6.249  | 8.780  | 1.00 | 0.00 |
| ATOM | 1304 | HA  | GLN | 82 | -3.463 | 6.048  | 9.829  | 1.00 | 0.00 |
| ATOM | 1305 | CB  | GLN | 82 | -4.248 | 7.260  | 8.267  | 1.00 | 0.00 |
| ATOM | 1306 | HB2 | GLN | 82 | -3.733 | 7.964  | 7.613  | 1.00 | 0.00 |
| ATOM | 1307 | HB3 | GLN | 82 | -5.019 | 6.737  | 7.701  | 1.00 | 0.00 |
| ATOM | 1308 | CG  | GLN | 82 | -4.889 | 8.015  | 9.418  | 1.00 | 0.00 |
| ATOM | 1309 | HG2 | GLN | 82 | -5.795 | 8.490  | 9.041  | 1.00 | 0.00 |
| ATOM | 1310 | HG3 | GLN | 82 | -5.148 | 7.322  | 10.218 | 1.00 | 0.00 |
| ATOM | 1311 | CD  | GLN | 82 | -3.977 | 9.090  | 9.983  | 1.00 | 0.00 |
| ATOM | 1312 | OE1 | GLN | 82 | -4.218 | 10.273 | 9.846  | 1.00 | 0.00 |

|      |      |      |     |    |        |       |        |      |      |
|------|------|------|-----|----|--------|-------|--------|------|------|
| ATOM | 1313 | NE2  | GLN | 82 | -2.895 | 8.690 | 10.608 | 1.00 | 0.00 |
| ATOM | 1314 | HE21 | GLN | 82 | -2.260 | 9.372 | 10.999 | 1.00 | 0.00 |
| ATOM | 1315 | HE22 | GLN | 82 | -2.701 | 7.703 | 10.694 | 1.00 | 0.00 |
| ATOM | 1316 | C    | GLN | 82 | -3.454 | 4.965 | 8.078  | 1.00 | 0.00 |
| ATOM | 1317 | O    | GLN | 82 | -3.543 | 3.988 | 8.802  | 1.00 | 0.00 |
| ATOM | 1318 | N    | VAL | 83 | -3.638 | 4.983 | 6.751  | 1.00 | 0.00 |
| ATOM | 1319 | H    | VAL | 83 | -3.785 | 5.900 | 6.353  | 1.00 | 0.00 |
| ATOM | 1320 | CA   | VAL | 83 | -3.711 | 3.836 | 5.874  | 1.00 | 0.00 |
| ATOM | 1321 | HA   | VAL | 83 | -4.724 | 3.446 | 5.780  | 1.00 | 0.00 |
| ATOM | 1322 | CB   | VAL | 83 | -3.166 | 4.110 | 4.483  | 1.00 | 0.00 |
| ATOM | 1323 | HB   | VAL | 83 | -4.015 | 4.211 | 3.807  | 1.00 | 0.00 |
| ATOM | 1324 | CG1  | VAL | 83 | -2.328 | 5.348 | 4.418  | 1.00 | 0.00 |
| ATOM | 1325 | HG11 | VAL | 83 | -1.478 | 5.248 | 5.092  | 1.00 | 0.00 |
| ATOM | 1326 | HG12 | VAL | 83 | -1.967 | 5.491 | 3.399  | 1.00 | 0.00 |
| ATOM | 1327 | HG13 | VAL | 83 | -2.927 | 6.209 | 4.714  | 1.00 | 0.00 |
| ATOM | 1328 | CG2  | VAL | 83 | -2.402 | 2.947 | 3.920  | 1.00 | 0.00 |
| ATOM | 1329 | HG21 | VAL | 83 | -3.057 | 2.078 | 3.856  | 1.00 | 0.00 |
| ATOM | 1330 | HG22 | VAL | 83 | -2.036 | 3.200 | 2.924  | 1.00 | 0.00 |
| ATOM | 1331 | HG23 | VAL | 83 | -1.557 | 2.718 | 4.569  | 1.00 | 0.00 |
| ATOM | 1332 | C    | VAL | 83 | -2.990 | 2.646 | 6.463  | 1.00 | 0.00 |
| ATOM | 1333 | O    | VAL | 83 | -3.573 | 1.606 | 6.541  | 1.00 | 0.00 |
| ATOM | 1334 | N    | MET | 84 | -1.760 | 2.734 | 6.910  | 1.00 | 0.00 |

|      |      |     |     |    |        |        |        |      |      |
|------|------|-----|-----|----|--------|--------|--------|------|------|
| ATOM | 1335 | H   | MET | 84 | -1.299 | 3.609  | 6.703  | 1.00 | 0.00 |
| ATOM | 1336 | CA  | MET | 84 | -1.021 | 1.724  | 7.625  | 1.00 | 0.00 |
| ATOM | 1337 | HA  | MET | 84 | -0.593 | 1.010  | 6.922  | 1.00 | 0.00 |
| ATOM | 1338 | CB  | MET | 84 | 0.106  | 2.361  | 8.416  | 1.00 | 0.00 |
| ATOM | 1339 | HB2 | MET | 84 | 0.805  | 2.815  | 7.713  | 1.00 | 0.00 |
| ATOM | 1340 | HB3 | MET | 84 | -0.318 | 3.135  | 9.055  | 1.00 | 0.00 |
| ATOM | 1341 | CG  | MET | 84 | 0.837  | 1.344  | 9.271  | 1.00 | 0.00 |
| ATOM | 1342 | HG2 | MET | 84 | 0.116  | 0.890  | 9.949  | 1.00 | 0.00 |
| ATOM | 1343 | HG3 | MET | 84 | 1.248  | 0.579  | 8.612  | 1.00 | 0.00 |
| ATOM | 1344 | SD  | MET | 84 | 2.175  | 2.080  | 10.233 | 1.00 | 0.00 |
| ATOM | 1345 | CE  | MET | 84 | 1.277  | 3.511  | 10.915 | 1.00 | 0.00 |
| ATOM | 1346 | HE1 | MET | 84 | 0.433  | 3.162  | 11.509 | 1.00 | 0.00 |
| ATOM | 1347 | HE2 | MET | 84 | 1.948  | 4.095  | 11.545 | 1.00 | 0.00 |
| ATOM | 1348 | HE3 | MET | 84 | 0.912  | 4.135  | 10.098 | 1.00 | 0.00 |
| ATOM | 1349 | C   | MET | 84 | -1.894 | 0.932  | 8.585  | 1.00 | 0.00 |
| ATOM | 1350 | O   | MET | 84 | -2.086 | -0.267 | 8.386  | 1.00 | 0.00 |
| ATOM | 1351 | N   | SER | 85 | -2.458 | 1.598  | 9.594  | 1.00 | 0.00 |
| ATOM | 1352 | H   | SER | 85 | -2.164 | 2.550  | 9.761  | 1.00 | 0.00 |
| ATOM | 1353 | CA  | SER | 85 | -3.409 | 1.001  | 10.510 | 1.00 | 0.00 |
| ATOM | 1354 | HA  | SER | 85 | -3.146 | -0.040 | 10.695 | 1.00 | 0.00 |
| ATOM | 1355 | CB  | SER | 85 | -3.395 | 1.748  | 11.833 | 1.00 | 0.00 |
| ATOM | 1356 | HB2 | SER | 85 | -2.369 | 1.974  | 12.123 | 1.00 | 0.00 |

|      |      |     |     |    |         |        |        |      |      |
|------|------|-----|-----|----|---------|--------|--------|------|------|
| ATOM | 1357 | HB3 | SER | 85 | -3.959  | 2.677  | 11.743 | 1.00 | 0.00 |
| ATOM | 1358 | OG  | SER | 85 | -3.994  | 0.924  | 12.819 | 1.00 | 0.00 |
| ATOM | 1359 | HG  | SER | 85 | -3.993  | 1.383  | 13.662 | 1.00 | 0.00 |
| ATOM | 1360 | C   | SER | 85 | -4.829  | 0.951  | 9.930  | 1.00 | 0.00 |
| ATOM | 1361 | O   | SER | 85 | -5.819  | 1.056  | 10.641 | 1.00 | 0.00 |
| ATOM | 1362 | N   | MET | 86 | -4.958  | 0.647  | 8.647  | 1.00 | 0.00 |
| ATOM | 1363 | H   | MET | 86 | -4.113  | 0.476  | 8.121  | 1.00 | 0.00 |
| ATOM | 1364 | CA  | MET | 86 | -6.222  | 0.561  | 7.957  | 1.00 | 0.00 |
| ATOM | 1365 | HA  | MET | 86 | -7.006  | 0.223  | 8.634  | 1.00 | 0.00 |
| ATOM | 1366 | CB  | MET | 86 | -6.592  | 1.931  | 7.436  | 1.00 | 0.00 |
| ATOM | 1367 | HB2 | MET | 86 | -5.672  | 2.437  | 7.141  | 1.00 | 0.00 |
| ATOM | 1368 | HB3 | MET | 86 | -7.228  | 1.796  | 6.561  | 1.00 | 0.00 |
| ATOM | 1369 | CG  | MET | 86 | -7.321  | 2.770  | 8.465  | 1.00 | 0.00 |
| ATOM | 1370 | HG2 | MET | 86 | -6.692  | 2.894  | 9.346  | 1.00 | 0.00 |
| ATOM | 1371 | HG3 | MET | 86 | -7.550  | 3.749  | 8.042  | 1.00 | 0.00 |
| ATOM | 1372 | SD  | MET | 86 | -8.862  | 1.954  | 8.944  | 1.00 | 0.00 |
| ATOM | 1373 | CE  | MET | 86 | -9.300  | 2.992  | 10.349 | 1.00 | 0.00 |
| ATOM | 1374 | HE1 | MET | 86 | -9.419  | 4.024  | 10.016 | 1.00 | 0.00 |
| ATOM | 1375 | HE2 | MET | 86 | -10.236 | 2.641  | 10.783 | 1.00 | 0.00 |
| ATOM | 1376 | HE3 | MET | 86 | -8.510  | 2.942  | 11.098 | 1.00 | 0.00 |
| ATOM | 1377 | C   | MET | 86 | -6.183  | -0.408 | 6.793  | 1.00 | 0.00 |
| ATOM | 1378 | O   | MET | 86 | -6.997  | -1.308 | 6.725  | 1.00 | 0.00 |



|      |      |     |     |    |        |        |        |      |      |
|------|------|-----|-----|----|--------|--------|--------|------|------|
| ATOM | 1379 | N   | ALA | 87 | -5.164 | -0.371 | 5.959  | 1.00 | 0.00 |
| ATOM | 1380 | H   | ALA | 87 | -4.530 | 0.403  | 6.095  | 1.00 | 0.00 |
| ATOM | 1381 | CA  | ALA | 87 | -4.912 | -1.269 | 4.880  | 1.00 | 0.00 |
| ATOM | 1382 | HA  | ALA | 87 | -5.838 | -1.529 | 4.367  | 1.00 | 0.00 |
| ATOM | 1383 | CB  | ALA | 87 | -3.968 | -0.612 | 3.877  | 1.00 | 0.00 |
| ATOM | 1384 | HB1 | ALA | 87 | -3.032 | -0.353 | 4.373  | 1.00 | 0.00 |
| ATOM | 1385 | HB2 | ALA | 87 | -3.766 | -1.304 | 3.059  | 1.00 | 0.00 |
| ATOM | 1386 | HB3 | ALA | 87 | -4.430 | 0.292  | 3.480  | 1.00 | 0.00 |
| ATOM | 1387 | C   | ALA | 87 | -4.336 | -2.559 | 5.428  | 1.00 | 0.00 |
| ATOM | 1388 | O   | ALA | 87 | -3.937 | -3.401 | 4.659  | 1.00 | 0.00 |
| ATOM | 1389 | N   | HIE | 88 | -4.213 | -2.724 | 6.737  | 1.00 | 0.00 |
| ATOM | 1390 | H   | HIE | 88 | -4.394 | -1.932 | 7.337  | 1.00 | 0.00 |
| ATOM | 1391 | CA  | HIE | 88 | -3.766 | -3.948 | 7.341  | 1.00 | 0.00 |
| ATOM | 1392 | HA  | HIE | 88 | -3.237 | -4.567 | 6.616  | 1.00 | 0.00 |
| ATOM | 1393 | CB  | HIE | 88 | -2.811 | -3.603 | 8.475  | 1.00 | 0.00 |
| ATOM | 1394 | HB2 | HIE | 88 | -2.188 | -4.467 | 8.703  | 1.00 | 0.00 |
| ATOM | 1395 | HB3 | HIE | 88 | -2.179 | -2.775 | 8.153  | 1.00 | 0.00 |
| ATOM | 1396 | CG  | HIE | 88 | -3.453 | -3.178 | 9.775  | 1.00 | 0.00 |
| ATOM | 1397 | ND1 | HIE | 88 | -3.179 | -3.733 | 11.006 | 1.00 | 0.00 |
| ATOM | 1398 | CE1 | HIE | 88 | -3.912 | -3.072 | 11.931 | 1.00 | 0.00 |
| ATOM | 1399 | HE1 | HIE | 88 | -3.817 | -3.336 | 12.984 | 1.00 | 0.00 |
| ATOM | 1400 | NE2 | HIE | 88 | -4.679 | -2.138 | 11.313 | 1.00 | 0.00 |

|      |      |          |    |        |        |        |      |      |
|------|------|----------|----|--------|--------|--------|------|------|
| ATOM | 1401 | HE2 HIE  | 88 | -5.337 | -1.499 | 11.735 | 1.00 | 0.00 |
| ATOM | 1402 | CD2 HIE  | 88 | -4.400 | -2.209 | 9.962  | 1.00 | 0.00 |
| ATOM | 1403 | HD2 HIE  | 88 | -4.915 | -1.549 | 9.263  | 1.00 | 0.00 |
| ATOM | 1404 | C HIE    | 88 | -4.953 | -4.754 | 7.806  | 1.00 | 0.00 |
| ATOM | 1405 | O HIE    | 88 | -4.816 | -5.938 | 7.976  | 1.00 | 0.00 |
| ATOM | 1406 | N ASN    | 89 | -6.084 | -4.114 | 8.083  | 1.00 | 0.00 |
| ATOM | 1407 | H ASN    | 89 | -6.093 | -3.107 | 7.997  | 1.00 | 0.00 |
| ATOM | 1408 | CA ASN   | 89 | -7.304 | -4.779 | 8.475  | 1.00 | 0.00 |
| ATOM | 1409 | HA ASN   | 89 | -7.093 | -5.809 | 8.760  | 1.00 | 0.00 |
| ATOM | 1410 | CB ASN   | 89 | -7.927 | -4.062 | 9.665  | 1.00 | 0.00 |
| ATOM | 1411 | HB2 ASN  | 89 | -7.692 | -2.998 | 9.618  | 1.00 | 0.00 |
| ATOM | 1412 | HB3 ASN  | 89 | -9.009 | -4.195 | 9.657  | 1.00 | 0.00 |
| ATOM | 1413 | CG ASN   | 89 | -7.382 | -4.619 | 10.954 | 1.00 | 0.00 |
| ATOM | 1414 | OD1 ASN  | 89 | -8.061 | -4.984 | 11.879 | 1.00 | 0.00 |
| ATOM | 1415 | ND2 ASN  | 89 | -6.080 | -4.693 | 11.041 | 1.00 | 0.00 |
| ATOM | 1416 | HD21 ASN | 89 | -5.653 | -5.057 | 11.880 | 1.00 | 0.00 |
| ATOM | 1417 | HD22 ASN | 89 | -5.507 | -4.385 | 10.268 | 1.00 | 0.00 |
| ATOM | 1418 | C ASN    | 89 | -8.306 | -4.754 | 7.348  | 1.00 | 0.00 |
| ATOM | 1419 | O ASN    | 89 | -9.164 | -5.593 | 7.328  | 1.00 | 0.00 |
| ATOM | 1420 | N LEU    | 90 | -8.202 | -3.825 | 6.407  | 1.00 | 0.00 |
| ATOM | 1421 | H LEU    | 90 | -7.534 | -3.080 | 6.548  | 1.00 | 0.00 |
| ATOM | 1422 | CA LEU   | 90 | -9.046 | -3.776 | 5.230  | 1.00 | 0.00 |

|      |      |      |     |    |         |        |       |      |      |
|------|------|------|-----|----|---------|--------|-------|------|------|
| ATOM | 1423 | HA   | LEU | 90 | -10.095 | -3.720 | 5.519 | 1.00 | 0.00 |
| ATOM | 1424 | CB   | LEU | 90 | -8.700  | -2.532 | 4.401 | 1.00 | 0.00 |
| ATOM | 1425 | HB2  | LEU | 90 | -7.631  | -2.370 | 4.540 | 1.00 | 0.00 |
| ATOM | 1426 | HB3  | LEU | 90 | -8.901  | -2.742 | 3.350 | 1.00 | 0.00 |
| ATOM | 1427 | CG   | LEU | 90 | -9.463  | -1.278 | 4.824 | 1.00 | 0.00 |
| ATOM | 1428 | HG   | LEU | 90 | -9.486  | -1.221 | 5.912 | 1.00 | 0.00 |
| ATOM | 1429 | CD1  | LEU | 90 | -8.772  | -0.030 | 4.262 | 1.00 | 0.00 |
| ATOM | 1430 | HD11 | LEU | 90 | -8.749  | -0.085 | 3.173 | 1.00 | 0.00 |
| ATOM | 1431 | HD12 | LEU | 90 | -9.322  | 0.860  | 4.568 | 1.00 | 0.00 |
| ATOM | 1432 | HD13 | LEU | 90 | -7.752  | 0.025  | 4.644 | 1.00 | 0.00 |
| ATOM | 1433 | CD2  | LEU | 90 | -10.906 | -1.358 | 4.334 | 1.00 | 0.00 |
| ATOM | 1434 | HD21 | LEU | 90 | -11.389 | -2.234 | 4.765 | 1.00 | 0.00 |
| ATOM | 1435 | HD22 | LEU | 90 | -11.444 | -0.460 | 4.639 | 1.00 | 0.00 |
| ATOM | 1436 | HD23 | LEU | 90 | -10.917 | -1.435 | 3.246 | 1.00 | 0.00 |
| ATOM | 1437 | C    | LEU | 90 | -8.918  | -5.057 | 4.403 | 1.00 | 0.00 |
| ATOM | 1438 | O    | LEU | 90 | -9.921  | -5.675 | 4.069 | 1.00 | 0.00 |
| ATOM | 1439 | N    | PRO | 91 | -7.684  | -5.480 | 4.076 | 1.00 | 0.00 |
| ATOM | 1440 | CD   | PRO | 91 | -6.424  | -4.866 | 4.418 | 1.00 | 0.00 |
| ATOM | 1441 | HD2  | PRO | 91 | -6.313  | -4.944 | 5.499 | 1.00 | 0.00 |
| ATOM | 1442 | HD3  | PRO | 91 | -6.493  | -3.815 | 4.136 | 1.00 | 0.00 |
| ATOM | 1443 | CG   | PRO | 91 | -5.335  | -5.590 | 3.671 | 1.00 | 0.00 |
| ATOM | 1444 | HG2  | PRO | 91 | -4.658  | -6.060 | 4.384 | 1.00 | 0.00 |

|      |      |          |    |        |         |       |      |      |
|------|------|----------|----|--------|---------|-------|------|------|
| ATOM | 1445 | HG3 PRO  | 91 | -4.780 | -4.877  | 3.059 | 1.00 | 0.00 |
| ATOM | 1446 | CB PRO   | 91 | -6.023 | -6.612  | 2.812 | 1.00 | 0.00 |
| ATOM | 1447 | HB2 PRO  | 91 | -5.524 | -7.569  | 2.959 | 1.00 | 0.00 |
| ATOM | 1448 | HB3 PRO  | 91 | -6.025 | -6.364  | 1.750 | 1.00 | 0.00 |
| ATOM | 1449 | CA PRO   | 91 | -7.452 | -6.687  | 3.331 | 1.00 | 0.00 |
| ATOM | 1450 | HA PRO   | 91 | -8.157 | -6.737  | 2.501 | 1.00 | 0.00 |
| ATOM | 1451 | C PRO    | 91 | -7.639 | -7.890  | 4.223 | 1.00 | 0.00 |
| ATOM | 1452 | O PRO    | 91 | -8.153 | -8.888  | 3.777 | 1.00 | 0.00 |
| ATOM | 1453 | N ILE    | 92 | -7.263 | -7.843  | 5.481 | 1.00 | 0.00 |
| ATOM | 1454 | H ILE    | 92 | -6.776 | -7.028  | 5.826 | 1.00 | 0.00 |
| ATOM | 1455 | CA ILE   | 92 | -7.470 | -8.953  | 6.385 | 1.00 | 0.00 |
| ATOM | 1456 | HA ILE   | 92 | -7.111 | -9.912  | 6.011 | 1.00 | 0.00 |
| ATOM | 1457 | CB ILE   | 92 | -6.782 | -8.634  | 7.706 | 1.00 | 0.00 |
| ATOM | 1458 | HB ILE   | 92 | -6.815 | -7.556  | 7.864 | 1.00 | 0.00 |
| ATOM | 1459 | CG2 ILE  | 92 | -7.473 | -9.344  | 8.876 | 1.00 | 0.00 |
| ATOM | 1460 | HG21 ILE | 92 | -7.440 | -10.422 | 8.718 | 1.00 | 0.00 |
| ATOM | 1461 | HG22 ILE | 92 | -6.960 | -9.097  | 9.805 | 1.00 | 0.00 |
| ATOM | 1462 | HG23 ILE | 92 | -8.511 | -9.018  | 8.937 | 1.00 | 0.00 |
| ATOM | 1463 | CG1 ILE  | 92 | -5.292 | -8.961  | 7.627 | 1.00 | 0.00 |
| ATOM | 1464 | HG12 ILE | 92 | -5.166 | -9.703  | 6.839 | 1.00 | 0.00 |
| ATOM | 1465 | HG13 ILE | 92 | -4.774 | -8.043  | 7.347 | 1.00 | 0.00 |
| ATOM | 1466 | CD1 ILE  | 92 | -4.709 | -9.495  | 8.923 | 1.00 | 0.00 |

|      |      |      |     |    |         |         |        |      |      |
|------|------|------|-----|----|---------|---------|--------|------|------|
| ATOM | 1467 | HD11 | ILE | 92 | -5.225  | -10.412 | 9.203  | 1.00 | 0.00 |
| ATOM | 1468 | HD12 | ILE | 92 | -3.648  | -9.703  | 8.786  | 1.00 | 0.00 |
| ATOM | 1469 | HD13 | ILE | 92 | -4.834  | -8.752  | 9.711  | 1.00 | 0.00 |
| ATOM | 1470 | C    | ILE | 92 | -8.946  | -9.232  | 6.586  | 1.00 | 0.00 |
| ATOM | 1471 | O    | ILE | 92 | -9.332  | -10.390 | 6.530  | 1.00 | 0.00 |
| ATOM | 1472 | N    | GLU | 93 | -9.747  | -8.193  | 6.783  | 1.00 | 0.00 |
| ATOM | 1473 | H    | GLU | 93 | -9.346  | -7.267  | 6.831  | 1.00 | 0.00 |
| ATOM | 1474 | CA   | GLU | 93 | -11.185 | -8.333  | 6.961  | 1.00 | 0.00 |
| ATOM | 1475 | HA   | GLU | 93 | -11.387 | -9.034  | 7.770  | 1.00 | 0.00 |
| ATOM | 1476 | CB   | GLU | 93 | -11.825 | -6.983  | 7.310  | 1.00 | 0.00 |
| ATOM | 1477 | HB2  | GLU | 93 | -11.300 | -6.196  | 6.767  | 1.00 | 0.00 |
| ATOM | 1478 | HB3  | GLU | 93 | -12.870 | -7.001  | 7.000  | 1.00 | 0.00 |
| ATOM | 1479 | CG   | GLU | 93 | -11.743 | -6.706  | 8.819  | 1.00 | 0.00 |
| ATOM | 1480 | HG2  | GLU | 93 | -11.351 | -7.600  | 9.304  | 1.00 | 0.00 |
| ATOM | 1481 | HG3  | GLU | 93 | -11.071 | -5.868  | 9.004  | 1.00 | 0.00 |
| ATOM | 1482 | CD   | GLU | 93 | -13.127 | -6.384  | 9.385  | 1.00 | 0.00 |
| ATOM | 1483 | OE1  | GLU | 93 | -13.746 | -5.421  | 8.872  | 1.00 | 0.00 |
| ATOM | 1484 | OE2  | GLU | 93 | -13.539 | -7.086  | 10.333 | 1.00 | 0.00 |
| ATOM | 1485 | C    | GLU | 93 | -11.836 | -8.883  | 5.694  | 1.00 | 0.00 |
| ATOM | 1486 | O    | GLU | 93 | -12.935 | -9.422  | 5.742  | 1.00 | 0.00 |
| ATOM | 1487 | N    | CYX | 94 | -11.143 | -8.762  | 4.558  | 1.00 | 0.00 |
| ATOM | 1488 | H    | CYX | 94 | -10.311 | -8.188  | 4.544  | 1.00 | 0.00 |

|      |      |      |     |    |         |         |       |      |      |
|------|------|------|-----|----|---------|---------|-------|------|------|
| ATOM | 1489 | CA   | CYX | 94 | -11.582 | -9.355  | 3.323 | 1.00 | 0.00 |
| ATOM | 1490 | HA   | CYX | 94 | -12.667 | -9.458  | 3.317 | 1.00 | 0.00 |
| ATOM | 1491 | CB   | CYX | 94 | -11.172 | -8.462  | 2.156 | 1.00 | 0.00 |
| ATOM | 1492 | HB2  | CYX | 94 | -10.230 | -7.966  | 2.390 | 1.00 | 0.00 |
| ATOM | 1493 | HB3  | CYX | 94 | -11.049 | -9.069  | 1.259 | 1.00 | 0.00 |
| ATOM | 1494 | SG   | CYX | 94 | -12.434 | -7.212  | 1.759 | 1.00 | 0.00 |
| ATOM | 1495 | C    | CYX | 94 | -11.046 | -10.762 | 3.158 | 1.00 | 0.00 |
| ATOM | 1496 | O    | CYX | 94 | -11.498 | -11.412 | 2.222 | 1.00 | 0.00 |
| ATOM | 1497 | N    | ASN | 95 | -10.084 | -11.187 | 3.992 | 1.00 | 0.00 |
| ATOM | 1498 | H    | ASN | 95 | -9.769  | -10.506 | 4.668 | 1.00 | 0.00 |
| ATOM | 1499 | CA   | ASN | 95 | -9.439  | -12.489 | 3.973 | 1.00 | 0.00 |
| ATOM | 1500 | HA   | ASN | 95 | -8.998  | -12.705 | 4.946 | 1.00 | 0.00 |
| ATOM | 1501 | CB   | ASN | 95 | -10.474 | -13.572 | 3.653 | 1.00 | 0.00 |
| ATOM | 1502 | HB2  | ASN | 95 | -11.419 | -13.261 | 4.097 | 1.00 | 0.00 |
| ATOM | 1503 | HB3  | ASN | 95 | -10.600 | -13.688 | 2.576 | 1.00 | 0.00 |
| ATOM | 1504 | CG   | ASN | 95 | -10.082 | -14.899 | 4.237 | 1.00 | 0.00 |
| ATOM | 1505 | OD1  | ASN | 95 | -10.819 | -15.495 | 4.995 | 1.00 | 0.00 |
| ATOM | 1506 | ND2  | ASN | 95 | -8.895  | -15.366 | 3.933 | 1.00 | 0.00 |
| ATOM | 1507 | HD21 | ASN | 95 | -8.595  | -16.255 | 4.306 | 1.00 | 0.00 |
| ATOM | 1508 | HD22 | ASN | 95 | -8.286  | -14.834 | 3.327 | 1.00 | 0.00 |
| ATOM | 1509 | C    | ASN | 95 | -8.300  | -12.461 | 2.935 | 1.00 | 0.00 |
| ATOM | 1510 | O    | ASN | 95 | -7.941  | -13.439 | 2.303 | 1.00 | 0.00 |

|      |      |      |     |    |        |         |        |      |      |
|------|------|------|-----|----|--------|---------|--------|------|------|
| ATOM | 1511 | N    | LEU | 96 | -7.763 | -11.307 | 2.618  | 1.00 | 0.00 |
| ATOM | 1512 | H    | LEU | 96 | -8.145 | -10.475 | 3.044  | 1.00 | 0.00 |
| ATOM | 1513 | CA   | LEU | 96 | -6.740 | -11.153 | 1.623  | 1.00 | 0.00 |
| ATOM | 1514 | HA   | LEU | 96 | -6.911 | -11.864 | 0.815  | 1.00 | 0.00 |
| ATOM | 1515 | CB   | LEU | 96 | -6.740 | -9.752  | 1.043  | 1.00 | 0.00 |
| ATOM | 1516 | HB2  | LEU | 96 | -6.326 | -9.159  | 1.858  | 1.00 | 0.00 |
| ATOM | 1517 | HB3  | LEU | 96 | -6.082 | -9.685  | 0.176  | 1.00 | 0.00 |
| ATOM | 1518 | CG   | LEU | 96 | -8.124 | -9.216  | 0.675  | 1.00 | 0.00 |
| ATOM | 1519 | HG   | LEU | 96 | -8.773 | -9.285  | 1.547  | 1.00 | 0.00 |
| ATOM | 1520 | CD1  | LEU | 96 | -8.036 | -7.781  | 0.229  | 1.00 | 0.00 |
| ATOM | 1521 | HD11 | LEU | 96 | -7.387 | -7.710  | -0.644 | 1.00 | 0.00 |
| ATOM | 1522 | HD12 | LEU | 96 | -9.031 | -7.418  | -0.029 | 1.00 | 0.00 |
| ATOM | 1523 | HD13 | LEU | 96 | -7.626 | -7.173  | 1.035  | 1.00 | 0.00 |
| ATOM | 1524 | CD2  | LEU | 96 | -8.825 | -10.078 | -0.355 | 1.00 | 0.00 |
| ATOM | 1525 | HD21 | LEU | 96 | -8.950 | -11.086 | 0.038  | 1.00 | 0.00 |
| ATOM | 1526 | HD22 | LEU | 96 | -9.803 | -9.652  | -0.581 | 1.00 | 0.00 |
| ATOM | 1527 | HD23 | LEU | 96 | -8.227 | -10.115 | -1.266 | 1.00 | 0.00 |
| ATOM | 1528 | C    | LEU | 96 | -5.440 | -11.552 | 2.274  | 1.00 | 0.00 |
| ATOM | 1529 | O    | LEU | 96 | -4.887 | -12.568 | 1.905  | 1.00 | 0.00 |
| ATOM | 1530 | N    | MET | 97 | -5.058 | -10.849 | 3.338  | 1.00 | 0.00 |
| ATOM | 1531 | H    | MET | 97 | -5.629 | -10.067 | 3.625  | 1.00 | 0.00 |
| ATOM | 1532 | CA   | MET | 97 | -3.830 | -11.101 | 4.055  | 1.00 | 0.00 |

|      |      |     |     |    |        |         |       |      |      |
|------|------|-----|-----|----|--------|---------|-------|------|------|
| ATOM | 1533 | HA  | MET | 97 | -3.319 | -11.968 | 3.638 | 1.00 | 0.00 |
| ATOM | 1534 | CB  | MET | 97 | -2.915 | -9.891  | 3.930 | 1.00 | 0.00 |
| ATOM | 1535 | HB2 | MET | 97 | -1.944 | -10.156 | 4.347 | 1.00 | 0.00 |
| ATOM | 1536 | HB3 | MET | 97 | -2.804 | -9.659  | 2.870 | 1.00 | 0.00 |
| ATOM | 1537 | CG  | MET | 97 | -3.462 | -8.680  | 4.657 | 1.00 | 0.00 |
| ATOM | 1538 | HG2 | MET | 97 | -3.610 | -7.885  | 3.925 | 1.00 | 0.00 |
| ATOM | 1539 | HG3 | MET | 97 | -4.422 | -8.953  | 5.094 | 1.00 | 0.00 |
| ATOM | 1540 | SD  | MET | 97 | -2.359 | -8.087  | 5.966 | 1.00 | 0.00 |
| ATOM | 1541 | CE  | MET | 97 | -0.886 | -7.805  | 4.961 | 1.00 | 0.00 |
| ATOM | 1542 | HE1 | MET | 97 | -1.109 | -7.071  | 4.186 | 1.00 | 0.00 |
| ATOM | 1543 | HE2 | MET | 97 | -0.080 | -7.431  | 5.593 | 1.00 | 0.00 |
| ATOM | 1544 | HE3 | MET | 97 | -0.578 | -8.741  | 4.495 | 1.00 | 0.00 |
| ATOM | 1545 | C   | MET | 97 | -4.059 | -11.444 | 5.492 | 1.00 | 0.00 |
| ATOM | 1546 | O   | MET | 97 | -3.157 | -11.175 | 6.276 | 1.00 | 0.00 |
| ATOM | 1547 | N   | SER | 98 | -5.260 | -11.950 | 5.813 | 1.00 | 0.00 |
| ATOM | 1548 | H   | SER | 98 | -5.944 | -12.050 | 5.076 | 1.00 | 0.00 |
| ATOM | 1549 | CA  | SER | 98 | -5.657 | -12.288 | 7.177 | 1.00 | 0.00 |
| ATOM | 1550 | HA  | SER | 98 | -5.982 | -11.385 | 7.695 | 1.00 | 0.00 |
| ATOM | 1551 | CB  | SER | 98 | -6.800 | -13.290 | 7.183 | 1.00 | 0.00 |
| ATOM | 1552 | HB2 | SER | 98 | -7.074 | -13.499 | 8.216 | 1.00 | 0.00 |
| ATOM | 1553 | HB3 | SER | 98 | -7.651 | -12.850 | 6.663 | 1.00 | 0.00 |
| ATOM | 1554 | OG  | SER | 98 | -6.426 | -14.497 | 6.540 | 1.00 | 0.00 |



|      |      |      |     |     |        |         |        |      |      |
|------|------|------|-----|-----|--------|---------|--------|------|------|
| ATOM | 1555 | HG   | SER | 98  | -7.164 | -15.110 | 6.557  | 1.00 | 0.00 |
| ATOM | 1556 | C    | SER | 98  | -4.495 | -12.827 | 8.028  | 1.00 | 0.00 |
| ATOM | 1557 | O    | SER | 98  | -3.899 | -12.192 | 8.886  | 1.00 | 0.00 |
| ATOM | 1558 | N    | GLN | 99  | -4.039 | -14.013 | 7.713  | 1.00 | 0.00 |
| ATOM | 1559 | H    | GLN | 99  | -4.588 | -14.584 | 7.086  | 1.00 | 0.00 |
| ATOM | 1560 | CA   | GLN | 99  | -2.831 | -14.575 | 8.271  | 1.00 | 0.00 |
| ATOM | 1561 | HA   | GLN | 99  | -2.038 | -13.834 | 8.376  | 1.00 | 0.00 |
| ATOM | 1562 | CB   | GLN | 99  | -3.225 | -15.065 | 9.656  | 1.00 | 0.00 |
| ATOM | 1563 | HB2  | GLN | 99  | -4.229 | -14.713 | 9.893  | 1.00 | 0.00 |
| ATOM | 1564 | HB3  | GLN | 99  | -3.208 | -16.154 | 9.674  | 1.00 | 0.00 |
| ATOM | 1565 | CG   | GLN | 99  | -2.244 | -14.526 | 10.683 | 1.00 | 0.00 |
| ATOM | 1566 | HG2  | GLN | 99  | -1.397 | -15.209 | 10.737 | 1.00 | 0.00 |
| ATOM | 1567 | HG3  | GLN | 99  | -1.894 | -13.536 | 10.388 | 1.00 | 0.00 |
| ATOM | 1568 | CD   | GLN | 99  | -2.877 | -14.426 | 12.060 | 1.00 | 0.00 |
| ATOM | 1569 | OE1  | GLN | 99  | -3.957 | -14.907 | 12.353 | 1.00 | 0.00 |
| ATOM | 1570 | NE2  | GLN | 99  | -2.201 | -13.751 | 12.962 | 1.00 | 0.00 |
| ATOM | 1571 | HE21 | GLN | 99  | -2.572 | -13.650 | 13.896 | 1.00 | 0.00 |
| ATOM | 1572 | HE22 | GLN | 99  | -1.313 | -13.335 | 12.717 | 1.00 | 0.00 |
| ATOM | 1573 | C    | GLN | 99  | -2.262 | -15.669 | 7.370  | 1.00 | 0.00 |
| ATOM | 1574 | O    | GLN | 99  | -2.076 | -16.815 | 7.777  | 1.00 | 0.00 |
| ATOM | 1575 | N    | PRO | 100 | -2.025 | -15.346 | 6.090  | 1.00 | 0.00 |
| ATOM | 1576 | CD   | PRO | 100 | -2.174 | -14.050 | 5.458  | 1.00 | 0.00 |

|      |      |         |     |        |         |       |      |      |
|------|------|---------|-----|--------|---------|-------|------|------|
| ATOM | 1577 | HD2 PRO | 100 | -1.431 | -13.384 | 5.897 | 1.00 | 0.00 |
| ATOM | 1578 | HD3 PRO | 100 | -3.173 | -13.684 | 5.693 | 1.00 | 0.00 |
| ATOM | 1579 | CG PRO  | 100 | -1.968 | -14.250 | 3.975 | 1.00 | 0.00 |
| ATOM | 1580 | HG2 PRO | 100 | -1.115 | -13.653 | 3.652 | 1.00 | 0.00 |
| ATOM | 1581 | HG3 PRO | 100 | -2.862 | -13.919 | 3.445 | 1.00 | 0.00 |
| ATOM | 1582 | CB PRO  | 100 | -1.724 | -15.728 | 3.754 | 1.00 | 0.00 |
| ATOM | 1583 | HB2 PRO | 100 | -0.827 | -15.846 | 3.146 | 1.00 | 0.00 |
| ATOM | 1584 | HB3 PRO | 100 | -2.559 | -16.235 | 3.271 | 1.00 | 0.00 |
| ATOM | 1585 | CA PRO  | 100 | -1.489 | -16.320 | 5.152 | 1.00 | 0.00 |
| ATOM | 1586 | HA PRO  | 100 | -2.041 | -17.254 | 5.254 | 1.00 | 0.00 |
| ATOM | 1587 | C PRO   | 100 | -0.007 | -16.571 | 5.433 | 1.00 | 0.00 |
| ATOM | 1588 | O PRO   | 100 | 0.378  | -17.691 | 5.750 | 1.00 | 0.00 |
| ATOM | 1589 | N CYX   | 101 | 0.825  | -15.546 | 5.257 | 1.00 | 0.00 |
| ATOM | 1590 | H CYX   | 101 | 0.473  | -14.672 | 4.892 | 1.00 | 0.00 |
| ATOM | 1591 | CA CYX  | 101 | 2.240  | -15.663 | 5.500 | 1.00 | 0.00 |
| ATOM | 1592 | HA CYX  | 101 | 2.618  | -16.591 | 5.071 | 1.00 | 0.00 |
| ATOM | 1593 | CB CYX  | 101 | 2.978  | -14.491 | 4.855 | 1.00 | 0.00 |
| ATOM | 1594 | HB2 CYX | 101 | 2.993  | -13.646 | 5.544 | 1.00 | 0.00 |
| ATOM | 1595 | HB3 CYX | 101 | 4.001  | -14.788 | 4.622 | 1.00 | 0.00 |
| ATOM | 1596 | SG CYX  | 101 | 2.230  | -13.854 | 3.305 | 1.00 | 0.00 |
| ATOM | 1597 | C CYX   | 101 | 2.462  | -15.741 | 7.003 | 1.00 | 0.00 |
| ATOM | 1598 | O CYX   | 101 | 1.994  | -14.870 | 7.741 | 1.00 | 0.00 |

|      |      |      |     |     |        |         |        |      |      |
|------|------|------|-----|-----|--------|---------|--------|------|------|
| ATOM | 1599 | N    | GLN | 102 | 3.182  | -16.762 | 7.438  | 1.00 | 0.00 |
| ATOM | 1600 | H    | GLN | 102 | 3.480  | -17.466 | 6.778  | 1.00 | 0.00 |
| ATOM | 1601 | CA   | GLN | 102 | 3.502  | -16.953 | 8.843  | 1.00 | 0.00 |
| ATOM | 1602 | HA   | GLN | 102 | 3.186  | -16.083 | 9.418  | 1.00 | 0.00 |
| ATOM | 1603 | CB   | GLN | 102 | 2.780  | -18.186 | 9.385  | 1.00 | 0.00 |
| ATOM | 1604 | HB2  | GLN | 102 | 3.101  | -19.060 | 8.818  | 1.00 | 0.00 |
| ATOM | 1605 | HB3  | GLN | 102 | 3.045  | -18.317 | 10.434 | 1.00 | 0.00 |
| ATOM | 1606 | CG   | GLN | 102 | 1.262  | -18.024 | 9.258  | 1.00 | 0.00 |
| ATOM | 1607 | HG2  | GLN | 102 | 1.024  | -16.971 | 9.410  | 1.00 | 0.00 |
| ATOM | 1608 | HG3  | GLN | 102 | 0.922  | -18.333 | 8.269  | 1.00 | 0.00 |
| ATOM | 1609 | CD   | GLN | 102 | 0.529  | -18.842 | 10.300 | 1.00 | 0.00 |
| ATOM | 1610 | OE1  | GLN | 102 | 0.533  | -18.539 | 11.480 | 1.00 | 0.00 |
| ATOM | 1611 | NE2  | GLN | 102 | -0.090 | -19.924 | 9.886  | 1.00 | 0.00 |
| ATOM | 1612 | HE21 | GLN | 102 | -0.591 | -20.499 | 10.547 | 1.00 | 0.00 |
| ATOM | 1613 | HE22 | GLN | 102 | -0.061 | -20.175 | 8.908  | 1.00 | 0.00 |
| ATOM | 1614 | C    | GLN | 102 | 5.006  | -17.062 | 9.034  | 1.00 | 0.00 |
| ATOM | 1615 | O    | GLN | 102 | 5.768  | -16.917 | 8.073  | 1.00 | 0.00 |
| ATOM | 1616 | N    | MET | 103 | 5.420  | -17.239 | 10.287 | 1.00 | 0.00 |
| ATOM | 1617 | H    | MET | 103 | 4.742  | -17.176 | 11.033 | 1.00 | 0.00 |
| ATOM | 1618 | CA   | MET | 103 | 6.820  | -17.439 | 10.640 | 1.00 | 0.00 |
| ATOM | 1619 | HA   | MET | 103 | 7.484  | -17.040 | 9.872  | 1.00 | 0.00 |
| ATOM | 1620 | CB   | MET | 103 | 7.072  | -16.681 | 11.947 | 1.00 | 0.00 |

|      |      |         |     |        |         |        |      |      |
|------|------|---------|-----|--------|---------|--------|------|------|
| ATOM | 1621 | HB2 MET | 103 | 6.210  | -16.048 | 12.157 | 1.00 | 0.00 |
| ATOM | 1622 | HB3 MET | 103 | 7.197  | -17.403 | 12.753 | 1.00 | 0.00 |
| ATOM | 1623 | CG MET  | 103 | 8.327  | -15.814 | 11.842 | 1.00 | 0.00 |
| ATOM | 1624 | HG2 MET | 103 | 8.661  | -15.806 | 10.804 | 1.00 | 0.00 |
| ATOM | 1625 | HG3 MET | 103 | 8.078  | -14.798 | 12.150 | 1.00 | 0.00 |
| ATOM | 1626 | SD MET  | 103 | 9.661  | -16.445 | 12.892 | 1.00 | 0.00 |
| ATOM | 1627 | CE MET  | 103 | 9.978  | -14.972 | 13.876 | 1.00 | 0.00 |
| ATOM | 1628 | HE1 MET | 103 | 9.074  | -14.695 | 14.418 | 1.00 | 0.00 |
| ATOM | 1629 | HE2 MET | 103 | 10.779 | -15.174 | 14.586 | 1.00 | 0.00 |
| ATOM | 1630 | HE3 MET | 103 | 10.273 | -14.152 | 13.220 | 1.00 | 0.00 |
| ATOM | 1631 | C MET   | 103 | 7.220  | -18.925 | 10.758 | 1.00 | 0.00 |
| ATOM | 1632 | O MET   | 103 | 6.338  | -19.690 | 11.227 | 1.00 | 0.00 |
| ATOM | 1633 | OXT MET | 103 | 8.392  | -19.200 | 10.402 | 1.00 | 0.00 |

TER

|      |      |        |     |        |         |        |      |      |
|------|------|--------|-----|--------|---------|--------|------|------|
| ATOM | 1634 | S1 LIG | 104 | 15.269 | -15.821 | -1.142 | 1.00 | 0.00 |
| ATOM | 1635 | O1 LIG | 104 | 17.293 | -19.613 | 0.485  | 1.00 | 0.00 |
| ATOM | 1636 | O2 LIG | 104 | 13.874 | -15.228 | -1.762 | 1.00 | 0.00 |
| ATOM | 1637 | O3 LIG | 104 | 15.745 | -15.420 | 0.365  | 1.00 | 0.00 |
| ATOM | 1638 | N1 LIG | 104 | 14.898 | -17.641 | -1.214 | 1.00 | 0.00 |
| ATOM | 1639 | H1 LIG | 104 | 13.891 | -17.736 | -1.308 | 1.00 | 0.00 |
| ATOM | 1640 | N2 LIG | 104 | 16.931 | -18.453 | -0.325 | 1.00 | 0.00 |
| ATOM | 1641 | N3 LIG | 104 | 19.678 | -14.778 | -5.075 | 1.00 | 0.00 |

|      |      |     |     |     |         |         |        |      |      |
|------|------|-----|-----|-----|---------|---------|--------|------|------|
| ATOM | 1642 | H10 | LIG | 104 | 19.481  | -14.373 | -5.974 | 1.00 | 0.00 |
| ATOM | 1643 | H11 | LIG | 104 | 20.636  | -14.989 | -4.855 | 1.00 | 0.00 |
| ATOM | 1644 | C1  | LIG | 104 | 16.640  | -15.540 | -2.349 | 1.00 | 0.00 |
| ATOM | 1645 | C2  | LIG | 104 | 16.306  | -14.980 | -3.581 | 1.00 | 0.00 |
| ATOM | 1646 | H2  | LIG | 104 | 15.272  | -14.743 | -3.806 | 1.00 | 0.00 |
| ATOM | 1647 | C3  | LIG | 104 | 17.950  | -15.854 | -1.990 | 1.00 | 0.00 |
| ATOM | 1648 | H3  | LIG | 104 | 18.167  | -16.312 | -1.034 | 1.00 | 0.00 |
| ATOM | 1649 | C4  | LIG | 104 | 15.609  | -18.570 | -0.479 | 1.00 | 0.00 |
| ATOM | 1650 | C5  | LIG | 104 | 18.670  | -15.031 | -4.172 | 1.00 | 0.00 |
| ATOM | 1651 | C6  | LIG | 104 | 17.325  | -14.725 | -4.493 | 1.00 | 0.00 |
| ATOM | 1652 | H4  | LIG | 104 | 17.088  | -14.285 | -5.457 | 1.00 | 0.00 |
| ATOM | 1653 | C7  | LIG | 104 | 18.963  | -15.599 | -2.909 | 1.00 | 0.00 |
| ATOM | 1654 | H5  | LIG | 104 | 19.990  | -15.842 | -2.655 | 1.00 | 0.00 |
| ATOM | 1655 | C8  | LIG | 104 | 15.078  | -19.743 | 0.161  | 1.00 | 0.00 |
| ATOM | 1656 | H6  | LIG | 104 | 14.048  | -20.058 | 0.185  | 1.00 | 0.00 |
| ATOM | 1657 | C9  | LIG | 104 | 16.154  | -20.356 | 0.735  | 1.00 | 0.00 |
| ATOM | 1658 | C10 | LIG | 104 | 16.325  | -21.591 | 1.544  | 1.00 | 0.00 |
| ATOM | 1659 | H7  | LIG | 104 | 15.362  | -22.090 | 1.685  | 1.00 | 0.00 |
| ATOM | 1660 | H8  | LIG | 104 | 17.011  | -22.289 | 1.053  | 1.00 | 0.00 |
| ATOM | 1661 | H9  | LIG | 104 | 16.744  | -21.356 | 2.528  | 1.00 | 0.00 |
| TER  |      |     |     |     |         |         |        |      |      |
| ATOM | 1662 | S1  | LIG | 105 | -24.917 | 18.378  | 3.911  | 1.00 | 0.00 |

|      |      |     |     |     |         |        |       |      |      |
|------|------|-----|-----|-----|---------|--------|-------|------|------|
| ATOM | 1663 | O1  | LIG | 105 | -23.342 | 21.496 | 6.897 | 1.00 | 0.00 |
| ATOM | 1664 | O2  | LIG | 105 | -26.267 | 17.614 | 3.385 | 1.00 | 0.00 |
| ATOM | 1665 | O3  | LIG | 105 | -24.184 | 19.500 | 2.986 | 1.00 | 0.00 |
| ATOM | 1666 | N1  | LIG | 105 | -25.588 | 19.179 | 5.448 | 1.00 | 0.00 |
| ATOM | 1667 | H1  | LIG | 105 | -26.601 | 19.184 | 5.364 | 1.00 | 0.00 |
| ATOM | 1668 | N2  | LIG | 105 | -23.615 | 20.255 | 6.177 | 1.00 | 0.00 |
| ATOM | 1669 | N3  | LIG | 105 | -20.968 | 14.225 | 5.686 | 1.00 | 0.00 |
| ATOM | 1670 | H10 | LIG | 105 | -21.216 | 13.251 | 5.698 | 1.00 | 0.00 |
| ATOM | 1671 | H11 | LIG | 105 | -20.037 | 14.476 | 5.970 | 1.00 | 0.00 |
| ATOM | 1672 | C1  | LIG | 105 | -23.694 | 17.120 | 4.494 | 1.00 | 0.00 |
| ATOM | 1673 | C2  | LIG | 105 | -24.096 | 15.785 | 4.491 | 1.00 | 0.00 |
| ATOM | 1674 | H2  | LIG | 105 | -25.097 | 15.521 | 4.171 | 1.00 | 0.00 |
| ATOM | 1675 | C3  | LIG | 105 | -22.417 | 17.527 | 4.878 | 1.00 | 0.00 |
| ATOM | 1676 | H3  | LIG | 105 | -22.152 | 18.577 | 4.892 | 1.00 | 0.00 |
| ATOM | 1677 | C4  | LIG | 105 | -24.947 | 20.232 | 6.074 | 1.00 | 0.00 |
| ATOM | 1678 | C5  | LIG | 105 | -21.873 | 15.184 | 5.291 | 1.00 | 0.00 |
| ATOM | 1679 | C6  | LIG | 105 | -23.181 | 14.816 | 4.890 | 1.00 | 0.00 |
| ATOM | 1680 | H4  | LIG | 105 | -23.470 | 13.771 | 4.892 | 1.00 | 0.00 |
| ATOM | 1681 | C7  | LIG | 105 | -21.509 | 16.553 | 5.280 | 1.00 | 0.00 |
| ATOM | 1682 | H5  | LIG | 105 | -20.512 | 16.845 | 5.590 | 1.00 | 0.00 |
| ATOM | 1683 | C8  | LIG | 105 | -25.571 | 21.367 | 6.695 | 1.00 | 0.00 |
| ATOM | 1684 | H6  | LIG | 105 | -26.627 | 21.580 | 6.745 | 1.00 | 0.00 |

|      |      |     |     |     |         |        |        |      |      |
|------|------|-----|-----|-----|---------|--------|--------|------|------|
| ATOM | 1685 | C9  | LIG | 105 | -24.543 | 22.113 | 7.194  | 1.00 | 0.00 |
| ATOM | 1686 | C10 | LIG | 105 | -24.470 | 23.398 | 7.940  | 1.00 | 0.00 |
| ATOM | 1687 | H7  | LIG | 105 | -25.473 | 23.797 | 8.110  | 1.00 | 0.00 |
| ATOM | 1688 | H8  | LIG | 105 | -23.980 | 23.259 | 8.910  | 1.00 | 0.00 |
| ATOM | 1689 | H9  | LIG | 105 | -23.889 | 24.139 | 7.380  | 1.00 | 0.00 |
| TER  |      |     |     |     |         |        |        |      |      |
| ATOM | 1690 | S1  | LIG | 106 | 21.749  | -8.158 | 20.490 | 1.00 | 0.00 |
| ATOM | 1691 | O1  | LIG | 106 | 23.402  | -4.567 | 18.145 | 1.00 | 0.00 |
| ATOM | 1692 | O2  | LIG | 106 | 21.750  | -9.793 | 20.579 | 1.00 | 0.00 |
| ATOM | 1693 | O3  | LIG | 106 | 22.534  | -7.265 | 21.604 | 1.00 | 0.00 |
| ATOM | 1694 | N1  | LIG | 106 | 22.555  | -7.933 | 18.830 | 1.00 | 0.00 |
| ATOM | 1695 | H1  | LIG | 106 | 23.026  | -8.805 | 18.607 | 1.00 | 0.00 |
| ATOM | 1696 | N2  | LIG | 106 | 22.523  | -5.572 | 18.738 | 1.00 | 0.00 |
| ATOM | 1697 | N3  | LIG | 106 | 16.071  | -6.301 | 19.941 | 1.00 | 0.00 |
| ATOM | 1698 | H10 | LIG | 106 | 15.320  | -6.962 | 19.846 | 1.00 | 0.00 |
| ATOM | 1699 | H11 | LIG | 106 | 15.837  | -5.323 | 19.952 | 1.00 | 0.00 |
| ATOM | 1700 | C1  | LIG | 106 | 20.012  | -7.561 | 20.289 | 1.00 | 0.00 |
| ATOM | 1701 | C2  | LIG | 106 | 19.013  | -8.524 | 20.158 | 1.00 | 0.00 |
| ATOM | 1702 | H2  | LIG | 106 | 19.271  | -9.577 | 20.160 | 1.00 | 0.00 |
| ATOM | 1703 | C3  | LIG | 106 | 19.746  | -6.192 | 20.310 | 1.00 | 0.00 |
| ATOM | 1704 | H3  | LIG | 106 | 20.553  | -5.473 | 20.386 | 1.00 | 0.00 |
| ATOM | 1705 | C4  | LIG | 106 | 23.114  | -6.732 | 18.436 | 1.00 | 0.00 |

|      |      |     |     |     |        |        |         |      |      |
|------|------|-----|-----|-----|--------|--------|---------|------|------|
| ATOM | 1706 | C5  | LIG | 106 | 17.377 | -6.720 | 20.056  | 1.00 | 0.00 |
| ATOM | 1707 | C6  | LIG | 106 | 17.693 | -8.100 | 20.042  | 1.00 | 0.00 |
| ATOM | 1708 | H4  | LIG | 106 | 16.898 | -8.833 | 19.944  | 1.00 | 0.00 |
| ATOM | 1709 | C7  | LIG | 106 | 18.424 | -5.776 | 20.190  | 1.00 | 0.00 |
| ATOM | 1710 | H5  | LIG | 106 | 18.194 | -4.716 | 20.196  | 1.00 | 0.00 |
| ATOM | 1711 | C8  | LIG | 106 | 24.316 | -6.558 | 17.667  | 1.00 | 0.00 |
| ATOM | 1712 | H6  | LIG | 106 | 24.972 | -7.333 | 17.305  | 1.00 | 0.00 |
| ATOM | 1713 | C9  | LIG | 106 | 24.447 | -5.209 | 17.507  | 1.00 | 0.00 |
| ATOM | 1714 | C10 | LIG | 106 | 25.451 | -4.345 | 16.830  | 1.00 | 0.00 |
| ATOM | 1715 | H7  | LIG | 106 | 26.231 | -4.957 | 16.371  | 1.00 | 0.00 |
| ATOM | 1716 | H8  | LIG | 106 | 24.980 | -3.736 | 16.051  | 1.00 | 0.00 |
| ATOM | 1717 | H9  | LIG | 106 | 25.918 | -3.660 | 17.546  | 1.00 | 0.00 |
| TER  |      |     |     |     |        |        |         |      |      |
| ATOM | 1718 | S1  | LIG | 107 | 13.920 | 14.156 | -17.525 | 1.00 | 0.00 |
| ATOM | 1719 | O1  | LIG | 107 | 16.380 | 12.881 | -13.858 | 1.00 | 0.00 |
| ATOM | 1720 | O2  | LIG | 107 | 12.780 | 15.206 | -18.053 | 1.00 | 0.00 |
| ATOM | 1721 | O3  | LIG | 107 | 15.472 | 14.308 | -17.997 | 1.00 | 0.00 |
| ATOM | 1722 | N1  | LIG | 107 | 13.795 | 14.449 | -15.694 | 1.00 | 0.00 |
| ATOM | 1723 | H1  | LIG | 107 | 13.322 | 15.339 | -15.566 | 1.00 | 0.00 |
| ATOM | 1724 | N2  | LIG | 107 | 15.440 | 12.912 | -14.975 | 1.00 | 0.00 |
| ATOM | 1725 | N3  | LIG | 107 | 11.960 | 8.577  | -18.540 | 1.00 | 0.00 |
| ATOM | 1726 | H10 | LIG | 107 | 11.037 | 8.414  | -18.903 | 1.00 | 0.00 |



|      |      |     |     |     |        |        |         |      |      |
|------|------|-----|-----|-----|--------|--------|---------|------|------|
| ATOM | 1727 | H11 | LIG | 107 | 12.545 | 7.778  | -18.365 | 1.00 | 0.00 |
| ATOM | 1728 | C1  | LIG | 107 | 13.327 | 12.427 | -17.798 | 1.00 | 0.00 |
| ATOM | 1729 | C2  | LIG | 107 | 12.037 | 12.262 | -18.300 | 1.00 | 0.00 |
| ATOM | 1730 | H2  | LIG | 107 | 11.418 | 13.129 | -18.498 | 1.00 | 0.00 |
| ATOM | 1731 | C3  | LIG | 107 | 14.180 | 11.356 | -17.536 | 1.00 | 0.00 |
| ATOM | 1732 | H3  | LIG | 107 | 15.167 | 11.522 | -17.121 | 1.00 | 0.00 |
| ATOM | 1733 | C4  | LIG | 107 | 14.791 | 14.069 | -14.814 | 1.00 | 0.00 |
| ATOM | 1734 | C5  | LIG | 107 | 12.412 | 9.854  | -18.294 | 1.00 | 0.00 |
| ATOM | 1735 | C6  | LIG | 107 | 11.581 | 10.972 | -18.548 | 1.00 | 0.00 |
| ATOM | 1736 | H4  | LIG | 107 | 10.582 | 10.820 | -18.943 | 1.00 | 0.00 |
| ATOM | 1737 | C7  | LIG | 107 | 13.716 | 10.068 | -17.783 | 1.00 | 0.00 |
| ATOM | 1738 | H5  | LIG | 107 | 14.359 | 9.218  | -17.580 | 1.00 | 0.00 |
| ATOM | 1739 | C8  | LIG | 107 | 15.229 | 14.794 | -13.652 | 1.00 | 0.00 |
| ATOM | 1740 | H6  | LIG | 107 | 14.866 | 15.749 | -13.309 | 1.00 | 0.00 |
| ATOM | 1741 | C9  | LIG | 107 | 16.203 | 14.019 | -13.093 | 1.00 | 0.00 |
| ATOM | 1742 | C10 | LIG | 107 | 17.072 | 14.162 | -11.895 | 1.00 | 0.00 |
| ATOM | 1743 | H7  | LIG | 107 | 16.852 | 15.098 | -11.375 | 1.00 | 0.00 |
| ATOM | 1744 | H8  | LIG | 107 | 16.919 | 13.331 | -11.199 | 1.00 | 0.00 |
| ATOM | 1745 | H9  | LIG | 107 | 18.130 | 14.161 | -12.181 | 1.00 | 0.00 |
| TER  |      |     |     |     |        |        |         |      |      |
| ATOM | 1746 | S1  | LIG | 108 | 6.706  | -0.124 | -20.338 | 1.00 | 0.00 |
| ATOM | 1747 | O1  | LIG | 108 | 8.145  | 0.540  | -16.024 | 1.00 | 0.00 |

|      |      |     |     |     |       |        |         |      |      |
|------|------|-----|-----|-----|-------|--------|---------|------|------|
| ATOM | 1748 | O2  | LIG | 108 | 5.971 | 0.595  | -21.613 | 1.00 | 0.00 |
| ATOM | 1749 | O3  | LIG | 108 | 8.300 | -0.460 | -20.379 | 1.00 | 0.00 |
| ATOM | 1750 | N1  | LIG | 108 | 6.372 | 1.147  | -19.024 | 1.00 | 0.00 |
| ATOM | 1751 | H1  | LIG | 108 | 6.128 | 2.011  | -19.500 | 1.00 | 0.00 |
| ATOM | 1752 | N2  | LIG | 108 | 7.433 | 0.069  | -17.209 | 1.00 | 0.00 |
| ATOM | 1753 | N3  | LIG | 108 | 3.572 | -5.024 | -18.870 | 1.00 | 0.00 |
| ATOM | 1754 | H10 | LIG | 108 | 2.708 | -5.241 | -19.336 | 1.00 | 0.00 |
| ATOM | 1755 | H11 | LIG | 108 | 3.897 | -5.661 | -18.163 | 1.00 | 0.00 |
| ATOM | 1756 | C1  | LIG | 108 | 5.742 | -1.622 | -19.845 | 1.00 | 0.00 |
| ATOM | 1757 | C2  | LIG | 108 | 4.549 | -1.869 | -20.523 | 1.00 | 0.00 |
| ATOM | 1758 | H2  | LIG | 108 | 4.212 | -1.186 | -21.294 | 1.00 | 0.00 |
| ATOM | 1759 | C3  | LIG | 108 | 6.240 | -2.468 | -18.855 | 1.00 | 0.00 |
| ATOM | 1760 | H3  | LIG | 108 | 7.158 | -2.227 | -18.333 | 1.00 | 0.00 |
| ATOM | 1761 | C4  | LIG | 108 | 7.085 | 1.193  | -17.841 | 1.00 | 0.00 |
| ATOM | 1762 | C5  | LIG | 108 | 4.290 | -3.896 | -19.194 | 1.00 | 0.00 |
| ATOM | 1763 | C6  | LIG | 108 | 3.824 | -3.010 | -20.196 | 1.00 | 0.00 |
| ATOM | 1764 | H4  | LIG | 108 | 2.894 | -3.225 | -20.713 | 1.00 | 0.00 |
| ATOM | 1765 | C7  | LIG | 108 | 5.507 | -3.604 | -18.531 | 1.00 | 0.00 |
| ATOM | 1766 | H5  | LIG | 108 | 5.871 | -4.274 | -17.758 | 1.00 | 0.00 |
| ATOM | 1767 | C8  | LIG | 108 | 7.504 | 2.376  | -17.140 | 1.00 | 0.00 |
| ATOM | 1768 | H6  | LIG | 108 | 7.347 | 3.399  | -17.442 | 1.00 | 0.00 |
| ATOM | 1769 | C9  | LIG | 108 | 8.145 | 1.923  | -16.024 | 1.00 | 0.00 |

|      |      |     |     |     |         |       |         |      |      |
|------|------|-----|-----|-----|---------|-------|---------|------|------|
| ATOM | 1770 | C10 | LIG | 108 | 8.821   | 2.592 | -14.882 | 1.00 | 0.00 |
| ATOM | 1771 | H7  | LIG | 108 | 8.768   | 3.678 | -14.991 | 1.00 | 0.00 |
| ATOM | 1772 | H8  | LIG | 108 | 8.352   | 2.313 | -13.932 | 1.00 | 0.00 |
| ATOM | 1773 | H9  | LIG | 108 | 9.875   | 2.298 | -14.827 | 1.00 | 0.00 |
| TER  |      |     |     |     |         |       |         |      |      |
| ATOM | 1774 | S1  | LIG | 109 | -9.033  | 6.230 | -15.427 | 1.00 | 0.00 |
| ATOM | 1775 | O1  | LIG | 109 | -6.034  | 8.901 | -17.662 | 1.00 | 0.00 |
| ATOM | 1776 | O2  | LIG | 109 | -9.193  | 5.168 | -14.191 | 1.00 | 0.00 |
| ATOM | 1777 | O3  | LIG | 109 | -9.658  | 7.731 | -15.319 | 1.00 | 0.00 |
| ATOM | 1778 | N1  | LIG | 109 | -7.179  | 6.333 | -15.517 | 1.00 | 0.00 |
| ATOM | 1779 | H1  | LIG | 109 | -6.818  | 5.980 | -14.634 | 1.00 | 0.00 |
| ATOM | 1780 | N2  | LIG | 109 | -6.994  | 7.858 | -17.311 | 1.00 | 0.00 |
| ATOM | 1781 | N3  | LIG | 109 | -10.880 | 3.552 | -20.467 | 1.00 | 0.00 |
| ATOM | 1782 | H10 | LIG | 109 | -11.149 | 2.583 | -20.467 | 1.00 | 0.00 |
| ATOM | 1783 | H11 | LIG | 109 | -10.943 | 4.056 | -21.335 | 1.00 | 0.00 |
| ATOM | 1784 | C1  | LIG | 109 | -9.567  | 5.419 | -17.000 | 1.00 | 0.00 |
| ATOM | 1785 | C2  | LIG | 109 | -9.924  | 4.072 | -16.938 | 1.00 | 0.00 |
| ATOM | 1786 | H2  | LIG | 109 | -9.866  | 3.539 | -15.996 | 1.00 | 0.00 |
| ATOM | 1787 | C3  | LIG | 109 | -9.633  | 6.167 | -18.174 | 1.00 | 0.00 |
| ATOM | 1788 | H3  | LIG | 109 | -9.321  | 7.204 | -18.187 | 1.00 | 0.00 |
| ATOM | 1789 | C4  | LIG | 109 | -6.525  | 7.366 | -16.161 | 1.00 | 0.00 |
| ATOM | 1790 | C5  | LIG | 109 | -10.444 | 4.170 | -19.317 | 1.00 | 0.00 |

|      |      |     |     |     |         |         |         |      |      |
|------|------|-----|-----|-----|---------|---------|---------|------|------|
| ATOM | 1791 | C6  | LIG | 109 | -10.364 | 3.449   | -18.101 | 1.00 | 0.00 |
| ATOM | 1792 | H4  | LIG | 109 | -10.652 | 2.403   | -18.076 | 1.00 | 0.00 |
| ATOM | 1793 | C7  | LIG | 109 | -10.070 | 5.535   | -19.333 | 1.00 | 0.00 |
| ATOM | 1794 | H5  | LIG | 109 | -10.123 | 6.095   | -20.261 | 1.00 | 0.00 |
| ATOM | 1795 | C8  | LIG | 109 | -5.308  | 8.004   | -15.740 | 1.00 | 0.00 |
| ATOM | 1796 | H6  | LIG | 109 | -4.738  | 7.790   | -14.850 | 1.00 | 0.00 |
| ATOM | 1797 | C9  | LIG | 109 | -5.041  | 8.937   | -16.700 | 1.00 | 0.00 |
| ATOM | 1798 | C10 | LIG | 109 | -3.959  | 9.938   | -16.890 | 1.00 | 0.00 |
| ATOM | 1799 | H7  | LIG | 109 | -3.240  | 9.882   | -16.070 | 1.00 | 0.00 |
| ATOM | 1800 | H8  | LIG | 109 | -3.428  | 9.765   | -17.833 | 1.00 | 0.00 |
| ATOM | 1801 | H9  | LIG | 109 | -4.370  | 10.952  | -16.926 | 1.00 | 0.00 |
| TER  |      |     |     |     |         |         |         |      |      |
| ATOM | 1802 | S1  | LIG | 110 | -17.653 | -23.082 | -14.788 | 1.00 | 0.00 |
| ATOM | 1803 | O1  | LIG | 110 | -19.876 | -22.127 | -10.880 | 1.00 | 0.00 |
| ATOM | 1804 | O2  | LIG | 110 | -17.174 | -22.458 | -16.224 | 1.00 | 0.00 |
| ATOM | 1805 | O3  | LIG | 110 | -16.568 | -23.387 | -13.611 | 1.00 | 0.00 |
| ATOM | 1806 | N1  | LIG | 110 | -18.813 | -21.741 | -14.232 | 1.00 | 0.00 |
| ATOM | 1807 | H1  | LIG | 110 | -18.594 | -20.912 | -14.779 | 1.00 | 0.00 |
| ATOM | 1808 | N2  | LIG | 110 | -19.486 | -22.684 | -12.173 | 1.00 | 0.00 |
| ATOM | 1809 | N3  | LIG | 110 | -20.994 | -27.947 | -15.866 | 1.00 | 0.00 |
| ATOM | 1810 | H10 | LIG | 110 | -21.233 | -28.209 | -16.807 | 1.00 | 0.00 |
| ATOM | 1811 | H11 | LIG | 110 | -21.323 | -28.532 | -15.117 | 1.00 | 0.00 |

|      |      |     |     |     |         |         |         |      |      |
|------|------|-----|-----|-----|---------|---------|---------|------|------|
| ATOM | 1812 | C1  | LIG | 110 | -18.711 | -24.566 | -15.093 | 1.00 | 0.00 |
| ATOM | 1813 | C2  | LIG | 110 | -19.013 | -24.879 | -16.417 | 1.00 | 0.00 |
| ATOM | 1814 | H2  | LIG | 110 | -18.644 | -24.251 | -17.220 | 1.00 | 0.00 |
| ATOM | 1815 | C3  | LIG | 110 | -19.141 | -25.340 | -14.015 | 1.00 | 0.00 |
| ATOM | 1816 | H3  | LIG | 110 | -18.908 | -25.050 | -12.998 | 1.00 | 0.00 |
| ATOM | 1817 | C4  | LIG | 110 | -19.214 | -21.607 | -12.916 | 1.00 | 0.00 |
| ATOM | 1818 | C5  | LIG | 110 | -20.238 | -26.825 | -15.611 | 1.00 | 0.00 |
| ATOM | 1819 | C6  | LIG | 110 | -19.777 | -26.012 | -16.675 | 1.00 | 0.00 |
| ATOM | 1820 | H4  | LIG | 110 | -20.021 | -26.277 | -17.698 | 1.00 | 0.00 |
| ATOM | 1821 | C7  | LIG | 110 | -19.908 | -26.469 | -14.280 | 1.00 | 0.00 |
| ATOM | 1822 | H5  | LIG | 110 | -20.260 | -27.083 | -13.458 | 1.00 | 0.00 |
| ATOM | 1823 | C8  | LIG | 110 | -19.417 | -20.376 | -12.203 | 1.00 | 0.00 |
| ATOM | 1824 | H6  | LIG | 110 | -19.265 | -19.377 | -12.578 | 1.00 | 0.00 |
| ATOM | 1825 | C9  | LIG | 110 | -19.832 | -20.747 | -10.957 | 1.00 | 0.00 |
| ATOM | 1826 | C10 | LIG | 110 | -20.208 | -19.996 | -9.731  | 1.00 | 0.00 |
| ATOM | 1827 | H7  | LIG | 110 | -20.127 | -18.920 | -9.904  | 1.00 | 0.00 |
| ATOM | 1828 | H8  | LIG | 110 | -21.236 | -20.226 | -9.431  | 1.00 | 0.00 |
| ATOM | 1829 | H9  | LIG | 110 | -19.554 | -20.265 | -8.895  | 1.00 | 0.00 |
| TER  |      |     |     |     |         |         |         |      |      |
| ATOM | 1830 | S1  | LIG | 111 | -7.665  | 19.718  | 19.014  | 1.00 | 0.00 |
| ATOM | 1831 | O1  | LIG | 111 | -6.581  | 17.085  | 15.406  | 1.00 | 0.00 |
| ATOM | 1832 | O2  | LIG | 111 | -7.147  | 20.231  | 20.480  | 1.00 | 0.00 |

|      |      |     |     |     |         |        |        |      |      |
|------|------|-----|-----|-----|---------|--------|--------|------|------|
| ATOM | 1833 | O3  | LIG | 111 | -7.693  | 20.733 | 17.740 | 1.00 | 0.00 |
| ATOM | 1834 | N1  | LIG | 111 | -6.434  | 18.361 | 18.701 | 1.00 | 0.00 |
| ATOM | 1835 | H1  | LIG | 111 | -5.650  | 18.520 | 19.329 | 1.00 | 0.00 |
| ATOM | 1836 | N2  | LIG | 111 | -7.222  | 17.644 | 16.593 | 1.00 | 0.00 |
| ATOM | 1837 | N3  | LIG | 111 | -13.015 | 17.095 | 19.716 | 1.00 | 0.00 |
| ATOM | 1838 | H10 | LIG | 111 | -13.409 | 16.967 | 20.632 | 1.00 | 0.00 |
| ATOM | 1839 | H11 | LIG | 111 | -13.551 | 16.780 | 18.926 | 1.00 | 0.00 |
| ATOM | 1840 | C1  | LIG | 111 | -9.300  | 18.877 | 19.207 | 1.00 | 0.00 |
| ATOM | 1841 | C2  | LIG | 111 | -9.794  | 18.724 | 20.501 | 1.00 | 0.00 |
| ATOM | 1842 | H2  | LIG | 111 | -9.216  | 19.077 | 21.347 | 1.00 | 0.00 |
| ATOM | 1843 | C3  | LIG | 111 | -9.998  | 18.459 | 18.075 | 1.00 | 0.00 |
| ATOM | 1844 | H3  | LIG | 111 | -9.569  | 18.571 | 17.087 | 1.00 | 0.00 |
| ATOM | 1845 | C4  | LIG | 111 | -6.208  | 17.842 | 17.441 | 1.00 | 0.00 |
| ATOM | 1846 | C5  | LIG | 111 | -11.783 | 17.685 | 19.548 | 1.00 | 0.00 |
| ATOM | 1847 | C6  | LIG | 111 | -11.039 | 18.127 | 20.670 | 1.00 | 0.00 |
| ATOM | 1848 | H4  | LIG | 111 | -11.446 | 18.002 | 21.668 | 1.00 | 0.00 |
| ATOM | 1849 | C7  | LIG | 111 | -11.241 | 17.860 | 18.252 | 1.00 | 0.00 |
| ATOM | 1850 | H5  | LIG | 111 | -11.800 | 17.520 | 17.386 | 1.00 | 0.00 |
| ATOM | 1851 | C8  | LIG | 111 | -4.943  | 17.432 | 16.897 | 1.00 | 0.00 |
| ATOM | 1852 | H6  | LIG | 111 | -3.980  | 17.491 | 17.379 | 1.00 | 0.00 |
| ATOM | 1853 | C9  | LIG | 111 | -5.224  | 16.966 | 15.645 | 1.00 | 0.00 |
| ATOM | 1854 | C10 | LIG | 111 | -4.397  | 16.403 | 14.546 | 1.00 | 0.00 |

|      |      |     |     |     |        |         |        |      |      |
|------|------|-----|-----|-----|--------|---------|--------|------|------|
| ATOM | 1855 | H7  | LIG | 111 | -3.345 | 16.365  | 14.842 | 1.00 | 0.00 |
| ATOM | 1856 | H8  | LIG | 111 | -4.725 | 15.390  | 14.290 | 1.00 | 0.00 |
| ATOM | 1857 | H9  | LIG | 111 | -4.483 | 17.016  | 13.642 | 1.00 | 0.00 |
| TER  |      |     |     |     |        |         |        |      |      |
| ATOM | 1858 | S1  | LIG | 112 | -0.823 | -23.935 | -4.776 | 1.00 | 0.00 |
| ATOM | 1859 | O1  | LIG | 112 | -2.698 | -27.081 | -1.999 | 1.00 | 0.00 |
| ATOM | 1860 | O2  | LIG | 112 | -1.165 | -22.728 | -5.828 | 1.00 | 0.00 |
| ATOM | 1861 | O3  | LIG | 112 | -0.208 | -23.604 | -3.303 | 1.00 | 0.00 |
| ATOM | 1862 | N1  | LIG | 112 | -2.515 | -24.680 | -4.590 | 1.00 | 0.00 |
| ATOM | 1863 | H1  | LIG | 112 | -3.184 | -23.986 | -4.915 | 1.00 | 0.00 |
| ATOM | 1864 | N2  | LIG | 112 | -1.976 | -26.416 | -3.080 | 1.00 | 0.00 |
| ATOM | 1865 | N3  | LIG | 112 | 2.575  | -27.994 | -7.597 | 1.00 | 0.00 |
| ATOM | 1866 | H10 | LIG | 112 | 2.781  | -27.903 | -8.577 | 1.00 | 0.00 |
| ATOM | 1867 | H11 | LIG | 112 | 2.967  | -28.780 | -7.107 | 1.00 | 0.00 |
| ATOM | 1868 | C1  | LIG | 112 | 0.199  | -25.216 | -5.630 | 1.00 | 0.00 |
| ATOM | 1869 | C2  | LIG | 112 | 0.447  | -25.037 | -6.990 | 1.00 | 0.00 |
| ATOM | 1870 | H2  | LIG | 112 | 0.032  | -24.181 | -7.509 | 1.00 | 0.00 |
| ATOM | 1871 | C3  | LIG | 112 | 0.715  | -26.286 | -4.900 | 1.00 | 0.00 |
| ATOM | 1872 | H3  | LIG | 112 | 0.477  | -26.405 | -3.850 | 1.00 | 0.00 |
| ATOM | 1873 | C4  | LIG | 112 | -2.847 | -25.511 | -3.536 | 1.00 | 0.00 |
| ATOM | 1874 | C5  | LIG | 112 | 1.787  | -27.073 | -6.946 | 1.00 | 0.00 |
| ATOM | 1875 | C6  | LIG | 112 | 1.244  | -25.969 | -7.647 | 1.00 | 0.00 |

|      |      |     |     |     |        |         |        |      |      |
|------|------|-----|-----|-----|--------|---------|--------|------|------|
| ATOM | 1876 | H4  | LIG | 112 | 1.454  | -25.848 | -8.705 | 1.00 | 0.00 |
| ATOM | 1877 | C7  | LIG | 112 | 1.507  | -27.216 | -5.565 | 1.00 | 0.00 |
| ATOM | 1878 | H5  | LIG | 112 | 1.914  | -28.061 | -5.020 | 1.00 | 0.00 |
| ATOM | 1879 | C8  | LIG | 112 | -4.103 | -25.549 | -2.839 | 1.00 | 0.00 |
| ATOM | 1880 | H6  | LIG | 112 | -4.962 | -24.923 | -3.016 | 1.00 | 0.00 |
| ATOM | 1881 | C9  | LIG | 112 | -3.966 | -26.537 | -1.908 | 1.00 | 0.00 |
| ATOM | 1882 | C10 | LIG | 112 | -4.861 | -27.097 | -0.861 | 1.00 | 0.00 |
| ATOM | 1883 | H7  | LIG | 112 | -5.827 | -26.587 | -0.874 | 1.00 | 0.00 |
| ATOM | 1884 | H8  | LIG | 112 | -5.028 | -28.168 | -1.021 | 1.00 | 0.00 |
| ATOM | 1885 | H9  | LIG | 112 | -4.417 | -26.979 | 0.134  | 1.00 | 0.00 |

TER

|      |      |     |     |     |        |        |         |      |      |
|------|------|-----|-----|-----|--------|--------|---------|------|------|
| ATOM | 1886 | S1  | LIG | 113 | 15.213 | 22.383 | -8.569  | 1.00 | 0.00 |
| ATOM | 1887 | O1  | LIG | 113 | 15.980 | 26.510 | -10.439 | 1.00 | 0.00 |
| ATOM | 1888 | O2  | LIG | 113 | 15.491 | 20.778 | -8.744  | 1.00 | 0.00 |
| ATOM | 1889 | O3  | LIG | 113 | 15.962 | 23.233 | -7.398  | 1.00 | 0.00 |
| ATOM | 1890 | N1  | LIG | 113 | 15.778 | 22.985 | -10.234 | 1.00 | 0.00 |
| ATOM | 1891 | H1  | LIG | 113 | 16.357 | 22.251 | -10.635 | 1.00 | 0.00 |
| ATOM | 1892 | N2  | LIG | 113 | 15.350 | 25.290 | -9.942  | 1.00 | 0.00 |
| ATOM | 1893 | N3  | LIG | 113 | 9.282  | 23.253 | -8.318  | 1.00 | 0.00 |
| ATOM | 1894 | H10 | LIG | 113 | 8.643  | 22.489 | -8.452  | 1.00 | 0.00 |
| ATOM | 1895 | H11 | LIG | 113 | 8.894  | 24.161 | -8.129  | 1.00 | 0.00 |
| ATOM | 1896 | C1  | LIG | 113 | 13.389 | 22.682 | -8.520  | 1.00 | 0.00 |



|      |      |     |     |     |        |        |         |      |      |
|------|------|-----|-----|-----|--------|--------|---------|------|------|
| ATOM | 1897 | C2  | LIG | 113 | 12.553 | 21.584 | -8.717  | 1.00 | 0.00 |
| ATOM | 1898 | H2  | LIG | 113 | 12.978 | 20.606 | -8.907  | 1.00 | 0.00 |
| ATOM | 1899 | C3  | LIG | 113 | 12.908 | 23.964 | -8.256  | 1.00 | 0.00 |
| ATOM | 1900 | H3  | LIG | 113 | 13.589 | 24.797 | -8.135  | 1.00 | 0.00 |
| ATOM | 1901 | C4  | LIG | 113 | 16.085 | 24.310 | -10.476 | 1.00 | 0.00 |
| ATOM | 1902 | C5  | LIG | 113 | 10.644 | 23.063 | -8.385  | 1.00 | 0.00 |
| ATOM | 1903 | C6  | LIG | 113 | 11.177 | 21.777 | -8.648  | 1.00 | 0.00 |
| ATOM | 1904 | H4  | LIG | 113 | 10.507 | 20.937 | -8.794  | 1.00 | 0.00 |
| ATOM | 1905 | C7  | LIG | 113 | 11.531 | 24.149 | -8.193  | 1.00 | 0.00 |
| ATOM | 1906 | H5  | LIG | 113 | 11.132 | 25.139 | -7.996  | 1.00 | 0.00 |
| ATOM | 1907 | C8  | LIG | 113 | 17.148 | 24.804 | -11.309 | 1.00 | 0.00 |
| ATOM | 1908 | H6  | LIG | 113 | 17.876 | 24.219 | -11.846 | 1.00 | 0.00 |
| ATOM | 1909 | C9  | LIG | 113 | 17.038 | 26.164 | -11.261 | 1.00 | 0.00 |
| ATOM | 1910 | C10 | LIG | 113 | 17.803 | 27.281 | -11.874 | 1.00 | 0.00 |
| ATOM | 1911 | H7  | LIG | 113 | 18.616 | 26.892 | -12.491 | 1.00 | 0.00 |
| ATOM | 1912 | H8  | LIG | 113 | 17.154 | 27.902 | -12.501 | 1.00 | 0.00 |
| ATOM | 1913 | H9  | LIG | 113 | 18.231 | 27.929 | -11.101 | 1.00 | 0.00 |
| TER  |      |     |     |     |        |        |         |      |      |
| END  |      |     |     |     |        |        |         |      |      |

**Table Q:** The number of atoms present in the system of MO-Dic

|      |   |   |     |   |         |       |        |      |      |
|------|---|---|-----|---|---------|-------|--------|------|------|
| ATOM | 1 | N | PRO | 1 | -13.611 | 9.181 | -6.754 | 1.00 | 0.00 |
|------|---|---|-----|---|---------|-------|--------|------|------|

|      |    |     |     |   |         |        |         |      |      |
|------|----|-----|-----|---|---------|--------|---------|------|------|
| ATOM | 2  | H2  | PRO | 1 | -13.966 | 8.251  | -6.582  | 1.00 | 0.00 |
| ATOM | 3  | H3  | PRO | 1 | -14.236 | 9.910  | -7.071  | 1.00 | 0.00 |
| ATOM | 4  | CD  | PRO | 1 | -13.006 | 9.729  | -5.519  | 1.00 | 0.00 |
| ATOM | 5  | HD2 | PRO | 1 | -12.992 | 8.953  | -4.755  | 1.00 | 0.00 |
| ATOM | 6  | HD3 | PRO | 1 | -13.607 | 10.570 | -5.171  | 1.00 | 0.00 |
| ATOM | 7  | CG  | PRO | 1 | -11.620 | 10.149 | -5.945  | 1.00 | 0.00 |
| ATOM | 8  | HG2 | PRO | 1 | -10.902 | 9.616  | -5.322  | 1.00 | 0.00 |
| ATOM | 9  | HG3 | PRO | 1 | -11.526 | 11.221 | -5.771  | 1.00 | 0.00 |
| ATOM | 10 | CB  | PRO | 1 | -11.430 | 9.820  | -7.417  | 1.00 | 0.00 |
| ATOM | 11 | HB2 | PRO | 1 | -10.494 | 9.281  | -7.557  | 1.00 | 0.00 |
| ATOM | 12 | HB3 | PRO | 1 | -11.427 | 10.720 | -8.033  | 1.00 | 0.00 |
| ATOM | 13 | CA  | PRO | 1 | -12.614 | 8.921  | -7.808  | 1.00 | 0.00 |
| ATOM | 14 | HA  | PRO | 1 | -13.052 | 9.229  | -8.758  | 1.00 | 0.00 |
| ATOM | 15 | C   | PRO | 1 | -12.187 | 7.434  | -7.895  | 1.00 | 0.00 |
| ATOM | 16 | O   | PRO | 1 | -12.461 | 6.645  | -6.971  | 1.00 | 0.00 |
| ATOM | 17 | N   | PRO | 2 | -11.561 | 7.046  | -9.011  | 1.00 | 0.00 |
| ATOM | 18 | CD  | PRO | 2 | -11.157 | 7.917  | -10.120 | 1.00 | 0.00 |
| ATOM | 19 | HD2 | PRO | 2 | -10.394 | 8.609  | -9.763  | 1.00 | 0.00 |
| ATOM | 20 | HD3 | PRO | 2 | -12.027 | 8.480  | -10.458 | 1.00 | 0.00 |
| ATOM | 21 | CG  | PRO | 2 | -10.646 | 6.993  | -11.156 | 1.00 | 0.00 |
| ATOM | 22 | HG2 | PRO | 2 | -9.634  | 7.303  | -11.415 | 1.00 | 0.00 |
| ATOM | 23 | HG3 | PRO | 2 | -11.288 | 7.081  | -12.033 | 1.00 | 0.00 |

|      |    |      |     |   |         |       |         |      |      |
|------|----|------|-----|---|---------|-------|---------|------|------|
| ATOM | 24 | CB   | PRO | 2 | -10.669 | 5.622 | -10.624 | 1.00 | 0.00 |
| ATOM | 25 | HB2  | PRO | 2 | -9.655  | 5.226 | -10.672 | 1.00 | 0.00 |
| ATOM | 26 | HB3  | PRO | 2 | -11.338 | 4.977 | -11.193 | 1.00 | 0.00 |
| ATOM | 27 | CA   | PRO | 2 | -11.126 | 5.696 | -9.180  | 1.00 | 0.00 |
| ATOM | 28 | HA   | PRO | 2 | -11.975 | 5.038 | -8.993  | 1.00 | 0.00 |
| ATOM | 29 | C    | PRO | 2 | -9.983  | 5.338 | -8.226  | 1.00 | 0.00 |
| ATOM | 30 | O    | PRO | 2 | -9.240  | 6.158 | -7.776  | 1.00 | 0.00 |
| ATOM | 31 | N    | THR | 3 | -9.834  | 4.056 | -7.999  | 1.00 | 0.00 |
| ATOM | 32 | H    | THR | 3 | -10.346 | 3.363 | -8.526  | 1.00 | 0.00 |
| ATOM | 33 | CA   | THR | 3 | -8.934  | 3.605 | -6.974  | 1.00 | 0.00 |
| ATOM | 34 | HA   | THR | 3 | -9.267  | 4.048 | -6.035  | 1.00 | 0.00 |
| ATOM | 35 | CB   | THR | 3 | -9.045  | 2.078 | -6.862  | 1.00 | 0.00 |
| ATOM | 36 | HB   | THR | 3 | -8.752  | 1.634 | -7.813  | 1.00 | 0.00 |
| ATOM | 37 | CG2  | THR | 3 | -8.173  | 1.568 | -5.793  | 1.00 | 0.00 |
| ATOM | 38 | HG21 | THR | 3 | -8.466  | 2.012 | -4.842  | 1.00 | 0.00 |
| ATOM | 39 | HG22 | THR | 3 | -8.268  | 0.484 | -5.732  | 1.00 | 0.00 |
| ATOM | 40 | HG23 | THR | 3 | -7.138  | 1.830 | -6.012  | 1.00 | 0.00 |
| ATOM | 41 | OG1  | THR | 3 | -10.402 | 1.771 | -6.463  | 1.00 | 0.00 |
| ATOM | 42 | HG1  | THR | 3 | -10.505 | 0.820 | -6.384  | 1.00 | 0.00 |
| ATOM | 43 | C    | THR | 3 | -7.515  | 3.967 | -7.269  | 1.00 | 0.00 |
| ATOM | 44 | O    | THR | 3 | -6.813  | 4.425 | -6.387  | 1.00 | 0.00 |
| ATOM | 45 | N    | LEU | 4 | -7.098  | 3.775 | -8.518  | 1.00 | 0.00 |

|      |    |      |     |   |        |       |         |      |      |
|------|----|------|-----|---|--------|-------|---------|------|------|
| ATOM | 46 | H    | LEU | 4 | -7.653 | 3.389 | -9.269  | 1.00 | 0.00 |
| ATOM | 47 | CA   | LEU | 4 | -5.679 | 4.097 | -8.788  | 1.00 | 0.00 |
| ATOM | 48 | HA   | LEU | 4 | -5.063 | 3.566 | -8.063  | 1.00 | 0.00 |
| ATOM | 49 | CB   | LEU | 4 | -5.225 | 3.706 | -10.196 | 1.00 | 0.00 |
| ATOM | 50 | HB2  | LEU | 4 | -5.397 | 2.630 | -10.221 | 1.00 | 0.00 |
| ATOM | 51 | HB3  | LEU | 4 | -5.881 | 4.195 | -10.916 | 1.00 | 0.00 |
| ATOM | 52 | CG   | LEU | 4 | -3.791 | 3.993 | -10.549 | 1.00 | 0.00 |
| ATOM | 53 | HG   | LEU | 4 | -3.648 | 5.069 | -10.447 | 1.00 | 0.00 |
| ATOM | 54 | CD1  | LEU | 4 | -2.779 | 3.267 | -9.693  | 1.00 | 0.00 |
| ATOM | 55 | HD11 | LEU | 4 | -2.922 | 2.191 | -9.795  | 1.00 | 0.00 |
| ATOM | 56 | HD12 | LEU | 4 | -1.773 | 3.532 | -10.016 | 1.00 | 0.00 |
| ATOM | 57 | HD13 | LEU | 4 | -2.913 | 3.554 | -8.650  | 1.00 | 0.00 |
| ATOM | 58 | CD2  | LEU | 4 | -3.632 | 3.644 | -11.993 | 1.00 | 0.00 |
| ATOM | 59 | HD21 | LEU | 4 | -4.310 | 4.253 | -12.592 | 1.00 | 0.00 |
| ATOM | 60 | HD22 | LEU | 4 | -2.605 | 3.835 | -12.303 | 1.00 | 0.00 |
| ATOM | 61 | HD23 | LEU | 4 | -3.866 | 2.590 | -12.141 | 1.00 | 0.00 |
| ATOM | 62 | C    | LEU | 4 | -5.409 | 5.574 | -8.574  | 1.00 | 0.00 |
| ATOM | 63 | O    | LEU | 4 | -4.402 | 5.928 | -8.052  | 1.00 | 0.00 |
| ATOM | 64 | N    | GLN | 5 | -6.335 | 6.422 | -8.968  | 1.00 | 0.00 |
| ATOM | 65 | H    | GLN | 5 | -7.151 | 6.129 | -9.486  | 1.00 | 0.00 |
| ATOM | 66 | CA   | GLN | 5 | -6.129 | 7.847 | -8.755  | 1.00 | 0.00 |
| ATOM | 67 | HA   | GLN | 5 | -5.146 | 8.149 | -9.115  | 1.00 | 0.00 |

|      |    |      |     |   |        |        |         |      |      |
|------|----|------|-----|---|--------|--------|---------|------|------|
| ATOM | 68 | CB   | GLN | 5 | -7.203 | 8.635  | -9.536  | 1.00 | 0.00 |
| ATOM | 69 | HB2  | GLN | 5 | -7.073 | 8.405  | -10.594 | 1.00 | 0.00 |
| ATOM | 70 | HB3  | GLN | 5 | -8.178 | 8.277  | -9.204  | 1.00 | 0.00 |
| ATOM | 71 | CG   | GLN | 5 | -7.119 | 10.162 | -9.329  | 1.00 | 0.00 |
| ATOM | 72 | HG2  | GLN | 5 | -7.069 | 10.418 | -8.271  | 1.00 | 0.00 |
| ATOM | 73 | HG3  | GLN | 5 | -6.207 | 10.493 | -9.826  | 1.00 | 0.00 |
| ATOM | 74 | CD   | GLN | 5 | -8.300 | 10.890 | -9.949  | 1.00 | 0.00 |
| ATOM | 75 | OE1  | GLN | 5 | -8.934 | 10.385 | -10.916 | 1.00 | 0.00 |
| ATOM | 76 | NE2  | GLN | 5 | -8.651 | 12.052 | -9.364  | 1.00 | 0.00 |
| ATOM | 77 | HE21 | GLN | 5 | -9.429 | 12.584 | -9.730  | 1.00 | 0.00 |
| ATOM | 78 | HE22 | GLN | 5 | -8.136 | 12.387 | -8.563  | 1.00 | 0.00 |
| ATOM | 79 | C    | GLN | 5 | -6.103 | 8.228  | -7.264  | 1.00 | 0.00 |
| ATOM | 80 | O    | GLN | 5 | -5.235 | 9.003  | -6.845  | 1.00 | 0.00 |
| ATOM | 81 | N    | ARG | 6 | -6.894 | 7.516  | -6.427  | 1.00 | 0.00 |
| ATOM | 82 | H    | ARG | 6 | -7.520 | 6.817  | -6.801  | 1.00 | 0.00 |
| ATOM | 83 | CA   | ARG | 6 | -6.900 | 7.744  | -5.028  | 1.00 | 0.00 |
| ATOM | 84 | HA   | ARG | 6 | -7.020 | 8.810  | -4.831  | 1.00 | 0.00 |
| ATOM | 85 | CB   | ARG | 6 | -8.037 | 7.000  | -4.369  | 1.00 | 0.00 |
| ATOM | 86 | HB2  | ARG | 6 | -7.944 | 5.963  | -4.691  | 1.00 | 0.00 |
| ATOM | 87 | HB3  | ARG | 6 | -7.856 | 7.065  | -3.296  | 1.00 | 0.00 |
| ATOM | 88 | CG   | ARG | 6 | -9.434 | 7.500  | -4.676  | 1.00 | 0.00 |
| ATOM | 89 | HG2  | ARG | 6 | -9.403 | 8.590  | -4.701  | 1.00 | 0.00 |

|      |     |          |   |         |       |        |      |      |
|------|-----|----------|---|---------|-------|--------|------|------|
| ATOM | 90  | HG3 ARG  | 6 | -9.718  | 7.123 | -5.659 | 1.00 | 0.00 |
| ATOM | 91  | CD ARG   | 6 | -10.487 | 7.032 | -3.613 | 1.00 | 0.00 |
| ATOM | 92  | HD2 ARG  | 6 | -10.350 | 7.655 | -2.730 | 1.00 | 0.00 |
| ATOM | 93  | HD3 ARG  | 6 | -11.475 | 7.216 | -4.037 | 1.00 | 0.00 |
| ATOM | 94  | NE ARG   | 6 | -10.402 | 5.614 | -3.210 | 1.00 | 0.00 |
| ATOM | 95  | HE ARG   | 6 | -9.875  | 5.421 | -2.371 | 1.00 | 0.00 |
| ATOM | 96  | CZ ARG   | 6 | -10.966 | 4.583 | -3.866 | 1.00 | 0.00 |
| ATOM | 97  | NH1 ARG  | 6 | -11.698 | 4.765 | -4.966 | 1.00 | 0.00 |
| ATOM | 98  | HH11 ARG | 6 | -11.840 | 5.698 | -5.326 | 1.00 | 0.00 |
| ATOM | 99  | HH12 ARG | 6 | -12.107 | 3.969 | -5.434 | 1.00 | 0.00 |
| ATOM | 100 | NH2 ARG  | 6 | -10.800 | 3.323 | -3.421 | 1.00 | 0.00 |
| ATOM | 101 | HH21 ARG | 6 | -10.250 | 3.152 | -2.592 | 1.00 | 0.00 |
| ATOM | 102 | HH22 ARG | 6 | -11.227 | 2.555 | -3.919 | 1.00 | 0.00 |
| ATOM | 103 | C ARG    | 6 | -5.558  | 7.286 | -4.485 | 1.00 | 0.00 |
| ATOM | 104 | O ARG    | 6 | -4.997  | 7.863 | -3.567 | 1.00 | 0.00 |
| ATOM | 105 | N CYX    | 7 | -5.072  | 6.126 | -5.001 | 1.00 | 0.00 |
| ATOM | 106 | H CYX    | 7 | -5.592  | 5.552 | -5.649 | 1.00 | 0.00 |
| ATOM | 107 | CA CYX   | 7 | -3.778  | 5.662 | -4.561 | 1.00 | 0.00 |
| ATOM | 108 | HA CYX   | 7 | -3.787  | 5.516 | -3.481 | 1.00 | 0.00 |
| ATOM | 109 | CB CYX   | 7 | -3.419  | 4.302 | -5.247 | 1.00 | 0.00 |
| ATOM | 110 | HB2 CYX  | 7 | -4.035  | 3.508 | -4.825 | 1.00 | 0.00 |
| ATOM | 111 | HB3 CYX  | 7 | -3.605  | 4.375 | -6.319 | 1.00 | 0.00 |

|      |     |     |     |   |        |        |        |      |      |
|------|-----|-----|-----|---|--------|--------|--------|------|------|
| ATOM | 112 | SG  | CYX | 7 | -1.728 | 3.823  | -5.095 | 1.00 | 0.00 |
| ATOM | 113 | C   | CYX | 7 | -2.679 | 6.694  | -4.846 | 1.00 | 0.00 |
| ATOM | 114 | O   | CYX | 7 | -1.883 | 7.035  | -3.983 | 1.00 | 0.00 |
| ATOM | 115 | N   | CYX | 8 | -2.653 | 7.290  | -6.020 | 1.00 | 0.00 |
| ATOM | 116 | H   | CYX | 8 | -3.397 | 7.152  | -6.689 | 1.00 | 0.00 |
| ATOM | 117 | CA  | CYX | 8 | -1.573 | 8.181  | -6.372 | 1.00 | 0.00 |
| ATOM | 118 | HA  | CYX | 8 | -0.626 | 7.688  | -6.156 | 1.00 | 0.00 |
| ATOM | 119 | CB  | CYX | 8 | -1.594 | 8.562  | -7.817 | 1.00 | 0.00 |
| ATOM | 120 | HB2 | CYX | 8 | -2.576 | 8.960  | -8.074 | 1.00 | 0.00 |
| ATOM | 121 | HB3 | CYX | 8 | -0.835 | 9.321  | -8.004 | 1.00 | 0.00 |
| ATOM | 122 | SG  | CYX | 8 | -1.289 | 7.152  | -8.977 | 1.00 | 0.00 |
| ATOM | 123 | C   | CYX | 8 | -1.684 | 9.498  | -5.567 | 1.00 | 0.00 |
| ATOM | 124 | O   | CYX | 8 | -0.720 | 10.012 | -5.167 | 1.00 | 0.00 |
| ATOM | 125 | N   | ARG | 9 | -2.914 | 9.839  | -5.241 | 1.00 | 0.00 |
| ATOM | 126 | H   | ARG | 9 | -3.702 | 9.354  | -5.646 | 1.00 | 0.00 |
| ATOM | 127 | CA  | ARG | 9 | -3.187 | 11.015 | -4.335 | 1.00 | 0.00 |
| ATOM | 128 | HA  | ARG | 9 | -2.598 | 11.864 | -4.683 | 1.00 | 0.00 |
| ATOM | 129 | CB  | ARG | 9 | -4.640 | 11.417 | -4.307 | 1.00 | 0.00 |
| ATOM | 130 | HB2 | ARG | 9 | -4.943 | 11.735 | -5.305 | 1.00 | 0.00 |
| ATOM | 131 | HB3 | ARG | 9 | -5.242 | 10.562 | -4.001 | 1.00 | 0.00 |
| ATOM | 132 | CG  | ARG | 9 | -4.844 | 12.533 | -3.349 | 1.00 | 0.00 |
| ATOM | 133 | HG2 | ARG | 9 | -4.503 | 12.194 | -2.371 | 1.00 | 0.00 |

|      |     |          |    |        |        |        |      |      |
|------|-----|----------|----|--------|--------|--------|------|------|
| ATOM | 134 | HG3 ARG  | 9  | -4.226 | 13.368 | -3.680 | 1.00 | 0.00 |
| ATOM | 135 | CD ARG   | 9  | -6.313 | 12.990 | -3.250 | 1.00 | 0.00 |
| ATOM | 136 | HD2 ARG  | 9  | -6.373 | 13.678 | -2.407 | 1.00 | 0.00 |
| ATOM | 137 | HD3 ARG  | 9  | -6.539 | 13.527 | -4.172 | 1.00 | 0.00 |
| ATOM | 138 | NE ARG   | 9  | -7.308 | 11.936 | -3.066 | 1.00 | 0.00 |
| ATOM | 139 | HE ARG   | 9  | -7.906 | 11.785 | -3.866 | 1.00 | 0.00 |
| ATOM | 140 | CZ ARG   | 9  | -7.504 | 11.183 | -1.964 | 1.00 | 0.00 |
| ATOM | 141 | NH1 ARG  | 9  | -6.768 | 11.320 | -0.849 | 1.00 | 0.00 |
| ATOM | 142 | HH11 ARG | 9  | -6.032 | 12.011 | -0.815 | 1.00 | 0.00 |
| ATOM | 143 | HH12 ARG | 9  | -6.954 | 10.732 | -0.050 | 1.00 | 0.00 |
| ATOM | 144 | NH2 ARG  | 9  | -8.463 | 10.247 | -1.980 | 1.00 | 0.00 |
| ATOM | 145 | HH21 ARG | 9  | -9.024 | 10.117 | -2.810 | 1.00 | 0.00 |
| ATOM | 146 | HH22 ARG | 9  | -8.621 | 9.676  | -1.162 | 1.00 | 0.00 |
| ATOM | 147 | C ARG    | 9  | -2.698 | 10.737 | -2.926 | 1.00 | 0.00 |
| ATOM | 148 | O ARG    | 9  | -1.922 | 11.475 | -2.333 | 1.00 | 0.00 |
| ATOM | 149 | N GLN    | 10 | -2.969 | 9.531  | -2.365 | 1.00 | 0.00 |
| ATOM | 150 | H GLN    | 10 | -3.563 | 8.829  | -2.784 | 1.00 | 0.00 |
| ATOM | 151 | CA GLN   | 10 | -2.422 | 9.272  | -1.056 | 1.00 | 0.00 |
| ATOM | 152 | HA GLN   | 10 | -2.661 | 10.080 | -0.365 | 1.00 | 0.00 |
| ATOM | 153 | CB GLN   | 10 | -3.061 | 7.954  | -0.522 | 1.00 | 0.00 |
| ATOM | 154 | HB2 GLN  | 10 | -2.748 | 7.174  | -1.216 | 1.00 | 0.00 |
| ATOM | 155 | HB3 GLN  | 10 | -2.603 | 7.780  | 0.451  | 1.00 | 0.00 |



|      |     |      |     |    |        |       |        |      |      |
|------|-----|------|-----|----|--------|-------|--------|------|------|
| ATOM | 156 | CG   | GLN | 10 | -4.559 | 7.929 | -0.383 | 1.00 | 0.00 |
| ATOM | 157 | HG2  | GLN | 10 | -4.675 | 8.523 | 0.524  | 1.00 | 0.00 |
| ATOM | 158 | HG3  | GLN | 10 | -5.045 | 8.439 | -1.215 | 1.00 | 0.00 |
| ATOM | 159 | CD   | GLN | 10 | -5.247 | 6.568 | -0.171 | 1.00 | 0.00 |
| ATOM | 160 | OE1  | GLN | 10 | -4.697 | 5.483 | -0.367 | 1.00 | 0.00 |
| ATOM | 161 | NE2  | GLN | 10 | -6.527 | 6.655 | 0.087  | 1.00 | 0.00 |
| ATOM | 162 | HE21 | GLN | 10 | -7.066 | 5.815 | 0.241  | 1.00 | 0.00 |
| ATOM | 163 | HE22 | GLN | 10 | -6.970 | 7.562 | 0.130  | 1.00 | 0.00 |
| ATOM | 164 | C    | GLN | 10 | -0.987 | 9.168 | -0.959 | 1.00 | 0.00 |
| ATOM | 165 | O    | GLN | 10 | -0.309 | 9.668 | -0.112 | 1.00 | 0.00 |
| ATOM | 166 | N    | LEU | 11 | -0.377 | 8.539 | -2.012 | 1.00 | 0.00 |
| ATOM | 167 | H    | LEU | 11 | -0.954 | 8.051 | -2.683 | 1.00 | 0.00 |
| ATOM | 168 | CA   | LEU | 11 | 1.036  | 8.407 | -2.115 | 1.00 | 0.00 |
| ATOM | 169 | HA   | LEU | 11 | 1.451  | 8.088 | -1.159 | 1.00 | 0.00 |
| ATOM | 170 | CB   | LEU | 11 | 1.394  | 7.355 | -3.183 | 1.00 | 0.00 |
| ATOM | 171 | HB2  | LEU | 11 | 0.775  | 6.490 | -2.945 | 1.00 | 0.00 |
| ATOM | 172 | HB3  | LEU | 11 | 1.107  | 7.749 | -4.158 | 1.00 | 0.00 |
| ATOM | 173 | CG   | LEU | 11 | 2.812  | 6.952 | -3.214 | 1.00 | 0.00 |
| ATOM | 174 | HG   | LEU | 11 | 3.403  | 7.854 | -3.374 | 1.00 | 0.00 |
| ATOM | 175 | CD1  | LEU | 11 | 3.276  | 6.261 | -1.943 | 1.00 | 0.00 |
| ATOM | 176 | HD11 | LEU | 11 | 2.685  | 5.359 | -1.783 | 1.00 | 0.00 |
| ATOM | 177 | HD12 | LEU | 11 | 4.328  | 5.994 | -2.038 | 1.00 | 0.00 |

|      |     |      |     |    |        |        |        |      |      |
|------|-----|------|-----|----|--------|--------|--------|------|------|
| ATOM | 178 | HD13 | LEU | 11 | 3.148  | 6.934  | -1.096 | 1.00 | 0.00 |
| ATOM | 179 | CD2  | LEU | 11 | 3.059  | 6.023  | -4.395 | 1.00 | 0.00 |
| ATOM | 180 | HD21 | LEU | 11 | 2.811  | 6.540  | -5.323 | 1.00 | 0.00 |
| ATOM | 181 | HD22 | LEU | 11 | 4.108  | 5.729  | -4.413 | 1.00 | 0.00 |
| ATOM | 182 | HD23 | LEU | 11 | 2.434  | 5.135  | -4.297 | 1.00 | 0.00 |
| ATOM | 183 | C    | LEU | 11 | 1.765  | 9.713  | -2.321 | 1.00 | 0.00 |
| ATOM | 184 | O    | LEU | 11 | 2.833  | 9.923  | -1.827 | 1.00 | 0.00 |
| ATOM | 185 | N    | ARG | 12 | 1.083  | 10.555 | -3.089 | 1.00 | 0.00 |
| ATOM | 186 | H    | ARG | 12 | 0.185  | 10.333 | -3.495 | 1.00 | 0.00 |
| ATOM | 187 | CA   | ARG | 12 | 1.684  | 11.904 | -3.380 | 1.00 | 0.00 |
| ATOM | 188 | HA   | ARG | 12 | 2.675  | 11.780 | -3.815 | 1.00 | 0.00 |
| ATOM | 189 | CB   | ARG | 12 | 0.836  | 12.658 | -4.340 | 1.00 | 0.00 |
| ATOM | 190 | HB2  | ARG | 12 | 0.873  | 12.152 | -5.305 | 1.00 | 0.00 |
| ATOM | 191 | HB3  | ARG | 12 | -0.189 | 12.658 | -3.970 | 1.00 | 0.00 |
| ATOM | 192 | CG   | ARG | 12 | 1.315  | 14.089 | -4.501 | 1.00 | 0.00 |
| ATOM | 193 | HG2  | ARG | 12 | 1.275  | 14.550 | -3.514 | 1.00 | 0.00 |
| ATOM | 194 | HG3  | ARG | 12 | 2.350  | 14.041 | -4.838 | 1.00 | 0.00 |
| ATOM | 195 | CD   | ARG | 12 | 0.509  | 14.913 | -5.473 | 1.00 | 0.00 |
| ATOM | 196 | HD2  | ARG | 12 | 0.950  | 15.910 | -5.483 | 1.00 | 0.00 |
| ATOM | 197 | HD3  | ARG | 12 | 0.631  | 14.453 | -6.454 | 1.00 | 0.00 |
| ATOM | 198 | NE   | ARG | 12 | -0.866 | 15.032 | -5.199 | 1.00 | 0.00 |
| ATOM | 199 | HE   | ARG | 12 | -1.511 | 14.486 | -5.753 | 1.00 | 0.00 |

|      |     |      |     |    |        |        |        |      |      |
|------|-----|------|-----|----|--------|--------|--------|------|------|
| ATOM | 200 | CZ   | ARG | 12 | -1.339 | 15.735 | -4.207 | 1.00 | 0.00 |
| ATOM | 201 | NH1  | ARG | 12 | -0.533 | 16.428 | -3.446 | 1.00 | 0.00 |
| ATOM | 202 | HH11 | ARG | 12 | 0.460  | 16.419 | -3.628 | 1.00 | 0.00 |
| ATOM | 203 | HH12 | ARG | 12 | -0.908 | 16.970 | -2.680 | 1.00 | 0.00 |
| ATOM | 204 | NH2  | ARG | 12 | -2.577 | 15.828 | -4.035 | 1.00 | 0.00 |
| ATOM | 205 | HH21 | ARG | 12 | -3.209 | 15.357 | -4.667 | 1.00 | 0.00 |
| ATOM | 206 | HH22 | ARG | 12 | -2.938 | 16.374 | -3.265 | 1.00 | 0.00 |
| ATOM | 207 | C    | ARG | 12 | 1.787  | 12.660 | -2.057 | 1.00 | 0.00 |
| ATOM | 208 | O    | ARG | 12 | 2.801  | 13.262 | -1.843 | 1.00 | 0.00 |
| ATOM | 209 | N    | ASN | 13 | 0.819  | 12.452 | -1.179 | 1.00 | 0.00 |
| ATOM | 210 | H    | ASN | 13 | -0.030 | 11.990 | -1.472 | 1.00 | 0.00 |
| ATOM | 211 | CA   | ASN | 13 | 0.832  | 13.149 | 0.183  | 1.00 | 0.00 |
| ATOM | 212 | HA   | ASN | 13 | 1.239  | 14.156 | 0.084  | 1.00 | 0.00 |
| ATOM | 213 | CB   | ASN | 13 | -0.544 | 13.246 | 0.713  | 1.00 | 0.00 |
| ATOM | 214 | HB2  | ASN | 13 | -1.093 | 12.307 | 0.640  | 1.00 | 0.00 |
| ATOM | 215 | HB3  | ASN | 13 | -0.423 | 13.515 | 1.762  | 1.00 | 0.00 |
| ATOM | 216 | CG   | ASN | 13 | -1.335 | 14.314 | 0.036  | 1.00 | 0.00 |
| ATOM | 217 | OD1  | ASN | 13 | -1.117 | 15.472 | 0.294  | 1.00 | 0.00 |
| ATOM | 218 | ND2  | ASN | 13 | -2.155 | 13.957 | -0.871 | 1.00 | 0.00 |
| ATOM | 219 | HD21 | ASN | 13 | -2.708 | 14.654 | -1.351 | 1.00 | 0.00 |
| ATOM | 220 | HD22 | ASN | 13 | -2.249 | 12.980 | -1.106 | 1.00 | 0.00 |
| ATOM | 221 | C    | ASN | 13 | 1.869  | 12.647 | 1.157  | 1.00 | 0.00 |

|      |     |      |     |    |       |        |        |      |      |
|------|-----|------|-----|----|-------|--------|--------|------|------|
| ATOM | 222 | O    | ASN | 13 | 2.125 | 13.222 | 2.243  | 1.00 | 0.00 |
| ATOM | 223 | N    | VAL | 14 | 2.451 | 11.457 | 0.873  | 1.00 | 0.00 |
| ATOM | 224 | H    | VAL | 14 | 1.995 | 10.837 | 0.219  | 1.00 | 0.00 |
| ATOM | 225 | CA   | VAL | 14 | 3.584 | 11.007 | 1.522  | 1.00 | 0.00 |
| ATOM | 226 | HA   | VAL | 14 | 3.723 | 11.345 | 2.549  | 1.00 | 0.00 |
| ATOM | 227 | CB   | VAL | 14 | 3.634 | 9.414  | 1.499  | 1.00 | 0.00 |
| ATOM | 228 | HB   | VAL | 14 | 3.558 | 9.061  | 0.471  | 1.00 | 0.00 |
| ATOM | 229 | CG1  | VAL | 14 | 4.962 | 8.941  | 2.106  | 1.00 | 0.00 |
| ATOM | 230 | HG11 | VAL | 14 | 5.038 | 9.294  | 3.134  | 1.00 | 0.00 |
| ATOM | 231 | HG12 | VAL | 14 | 5.000 | 7.852  | 2.092  | 1.00 | 0.00 |
| ATOM | 232 | HG13 | VAL | 14 | 5.791 | 9.341  | 1.523  | 1.00 | 0.00 |
| ATOM | 233 | CG2  | VAL | 14 | 2.414 | 8.878  | 2.114  | 1.00 | 0.00 |
| ATOM | 234 | HG21 | VAL | 14 | 1.543 | 9.223  | 1.555  | 1.00 | 0.00 |
| ATOM | 235 | HG22 | VAL | 14 | 2.447 | 7.789  | 2.099  | 1.00 | 0.00 |
| ATOM | 236 | HG23 | VAL | 14 | 2.344 | 9.225  | 3.145  | 1.00 | 0.00 |
| ATOM | 237 | C    | VAL | 14 | 4.893 | 11.630 | 0.955  | 1.00 | 0.00 |
| ATOM | 238 | O    | VAL | 14 | 5.059 | 11.754 | -0.261 | 1.00 | 0.00 |
| ATOM | 239 | N    | SER | 15 | 5.838 | 12.013 | 1.825  | 1.00 | 0.00 |
| ATOM | 240 | H    | SER | 15 | 5.732 | 11.836 | 2.813  | 1.00 | 0.00 |
| ATOM | 241 | CA   | SER | 15 | 7.084 | 12.615 | 1.359  | 1.00 | 0.00 |
| ATOM | 242 | HA   | SER | 15 | 6.864 | 13.547 | 0.837  | 1.00 | 0.00 |
| ATOM | 243 | CB   | SER | 15 | 8.009 | 12.915 | 2.514  | 1.00 | 0.00 |

|      |     |     |     |    |        |        |        |      |      |
|------|-----|-----|-----|----|--------|--------|--------|------|------|
| ATOM | 244 | HB2 | SER | 15 | 8.255  | 12.029 | 3.099  | 1.00 | 0.00 |
| ATOM | 245 | HB3 | SER | 15 | 8.928  | 13.410 | 2.201  | 1.00 | 0.00 |
| ATOM | 246 | OG  | SER | 15 | 7.254  | 13.788 | 3.291  | 1.00 | 0.00 |
| ATOM | 247 | HG  | SER | 15 | 7.759  | 14.046 | 4.065  | 1.00 | 0.00 |
| ATOM | 248 | C   | SER | 15 | 7.843  | 11.700 | 0.521  | 1.00 | 0.00 |
| ATOM | 249 | O   | SER | 15 | 7.849  | 10.474 | 0.814  | 1.00 | 0.00 |
| ATOM | 250 | N   | PRO | 16 | 8.475  | 12.183 | -0.543 | 1.00 | 0.00 |
| ATOM | 251 | CD  | PRO | 16 | 8.416  | 13.586 | -1.122 | 1.00 | 0.00 |
| ATOM | 252 | HD2 | PRO | 16 | 8.878  | 14.287 | -0.427 | 1.00 | 0.00 |
| ATOM | 253 | HD3 | PRO | 16 | 7.376  | 13.870 | -1.285 | 1.00 | 0.00 |
| ATOM | 254 | CG  | PRO | 16 | 9.190  | 13.457 | -2.419 | 1.00 | 0.00 |
| ATOM | 255 | HG2 | PRO | 16 | 9.760  | 14.370 | -2.590 | 1.00 | 0.00 |
| ATOM | 256 | HG3 | PRO | 16 | 8.490  | 13.308 | -3.242 | 1.00 | 0.00 |
| ATOM | 257 | CB  | PRO | 16 | 10.078 | 12.288 | -2.263 | 1.00 | 0.00 |
| ATOM | 258 | HB2 | PRO | 16 | 10.996 | 12.522 | -1.725 | 1.00 | 0.00 |
| ATOM | 259 | HB3 | PRO | 16 | 10.325 | 11.849 | -3.230 | 1.00 | 0.00 |
| ATOM | 260 | CA  | PRO | 16 | 9.223  | 11.301 | -1.439 | 1.00 | 0.00 |
| ATOM | 261 | HA  | PRO | 16 | 8.494  | 10.820 | -2.091 | 1.00 | 0.00 |
| ATOM | 262 | C   | PRO | 16 | 10.057 | 10.231 | -0.729 | 1.00 | 0.00 |
| ATOM | 263 | O   | PRO | 16 | 10.001 | 9.028  | -1.053 | 1.00 | 0.00 |
| ATOM | 264 | N   | PHE | 17 | 10.807 | 10.633 | 0.286  | 1.00 | 0.00 |
| ATOM | 265 | H   | PHE | 17 | 10.831 | 11.603 | 0.568  | 1.00 | 0.00 |

|      |     |     |     |    |        |        |       |      |      |
|------|-----|-----|-----|----|--------|--------|-------|------|------|
| ATOM | 266 | CA  | PHE | 17 | 11.704 | 9.683  | 0.969 | 1.00 | 0.00 |
| ATOM | 267 | HA  | PHE | 17 | 12.273 | 9.127  | 0.224 | 1.00 | 0.00 |
| ATOM | 268 | CB  | PHE | 17 | 12.693 | 10.411 | 1.903 | 1.00 | 0.00 |
| ATOM | 269 | HB2 | PHE | 17 | 13.488 | 10.837 | 1.291 | 1.00 | 0.00 |
| ATOM | 270 | HB3 | PHE | 17 | 12.205 | 11.206 | 2.468 | 1.00 | 0.00 |
| ATOM | 271 | CG  | PHE | 17 | 13.370 | 9.497  | 2.927 | 1.00 | 0.00 |
| ATOM | 272 | CD1 | PHE | 17 | 14.351 | 8.565  | 2.522 | 1.00 | 0.00 |
| ATOM | 273 | HD1 | PHE | 17 | 14.647 | 8.519  | 1.474 | 1.00 | 0.00 |
| ATOM | 274 | CE1 | PHE | 17 | 14.943 | 7.703  | 3.457 | 1.00 | 0.00 |
| ATOM | 275 | HE1 | PHE | 17 | 15.700 | 6.988  | 3.136 | 1.00 | 0.00 |
| ATOM | 276 | CZ  | PHE | 17 | 14.560 | 7.761  | 4.805 | 1.00 | 0.00 |
| ATOM | 277 | HZ  | PHE | 17 | 15.026 | 7.091  | 5.527 | 1.00 | 0.00 |
| ATOM | 278 | CE2 | PHE | 17 | 13.588 | 8.671  | 5.224 | 1.00 | 0.00 |
| ATOM | 279 | HE2 | PHE | 17 | 13.290 | 8.713  | 6.272 | 1.00 | 0.00 |
| ATOM | 280 | CD2 | PHE | 17 | 12.996 | 9.530  | 4.295 | 1.00 | 0.00 |
| ATOM | 281 | HD2 | PHE | 17 | 12.234 | 10.240 | 4.617 | 1.00 | 0.00 |
| ATOM | 282 | C   | PHE | 17 | 10.934 | 8.604  | 1.749 | 1.00 | 0.00 |
| ATOM | 283 | O   | PHE | 17 | 11.511 | 7.561  | 2.058 | 1.00 | 0.00 |
| ATOM | 284 | N   | CYX | 18 | 9.677  | 8.866  | 2.074 | 1.00 | 0.00 |
| ATOM | 285 | H   | CYX | 18 | 9.271  | 9.731  | 1.746 | 1.00 | 0.00 |
| ATOM | 286 | CA  | CYX | 18 | 8.856  | 7.980  | 2.851 | 1.00 | 0.00 |
| ATOM | 287 | HA  | CYX | 18 | 9.510  | 7.336  | 3.438 | 1.00 | 0.00 |

|      |     |     |     |    |       |        |        |      |      |
|------|-----|-----|-----|----|-------|--------|--------|------|------|
| ATOM | 288 | CB  | CYX | 18 | 7.933 | 8.681  | 3.771  | 1.00 | 0.00 |
| ATOM | 289 | HB2 | CYX | 18 | 7.425 | 9.483  | 3.235  | 1.00 | 0.00 |
| ATOM | 290 | HB3 | CYX | 18 | 7.195 | 7.976  | 4.153  | 1.00 | 0.00 |
| ATOM | 291 | SG  | CYX | 18 | 8.981 | 9.396  | 5.156  | 1.00 | 0.00 |
| ATOM | 292 | C   | CYX | 18 | 7.958 | 7.108  | 1.897  | 1.00 | 0.00 |
| ATOM | 293 | O   | CYX | 18 | 7.232 | 6.284  | 2.459  | 1.00 | 0.00 |
| ATOM | 294 | N   | ARG | 19 | 8.000 | 7.292  | 0.561  | 1.00 | 0.00 |
| ATOM | 295 | H   | ARG | 19 | 8.698 | 7.858  | 0.101  | 1.00 | 0.00 |
| ATOM | 296 | CA  | ARG | 19 | 6.980 | 6.656  | -0.257 | 1.00 | 0.00 |
| ATOM | 297 | HA  | ARG | 19 | 6.011 | 6.825  | 0.213  | 1.00 | 0.00 |
| ATOM | 298 | CB  | ARG | 19 | 6.927 | 7.177  | -1.663 | 1.00 | 0.00 |
| ATOM | 299 | HB2 | ARG | 19 | 7.938 | 7.279  | -2.058 | 1.00 | 0.00 |
| ATOM | 300 | HB3 | ARG | 19 | 6.359 | 6.490  | -2.291 | 1.00 | 0.00 |
| ATOM | 301 | CG  | ARG | 19 | 6.240 | 8.550  | -1.658 | 1.00 | 0.00 |
| ATOM | 302 | HG2 | ARG | 19 | 5.203 | 8.379  | -1.367 | 1.00 | 0.00 |
| ATOM | 303 | HG3 | ARG | 19 | 6.738 | 9.145  | -0.893 | 1.00 | 0.00 |
| ATOM | 304 | CD  | ARG | 19 | 6.276 | 9.280  | -2.955 | 1.00 | 0.00 |
| ATOM | 305 | HD2 | ARG | 19 | 7.309 | 9.407  | -3.278 | 1.00 | 0.00 |
| ATOM | 306 | HD3 | ARG | 19 | 5.726 | 8.718  | -3.710 | 1.00 | 0.00 |
| ATOM | 307 | NE  | ARG | 19 | 5.667 | 10.591 | -2.817 | 1.00 | 0.00 |
| ATOM | 308 | HE  | ARG | 19 | 4.972 | 10.675 | -2.089 | 1.00 | 0.00 |
| ATOM | 309 | CZ  | ARG | 19 | 5.975 | 11.663 | -3.518 | 1.00 | 0.00 |

|      |     |      |     |    |        |        |        |      |      |
|------|-----|------|-----|----|--------|--------|--------|------|------|
| ATOM | 310 | NH1  | ARG | 19 | 6.923  | 11.633 | -4.442 | 1.00 | 0.00 |
| ATOM | 311 | HH11 | ARG | 19 | 7.424  | 10.775 | -4.619 | 1.00 | 0.00 |
| ATOM | 312 | HH12 | ARG | 19 | 7.140  | 12.469 | -4.966 | 1.00 | 0.00 |
| ATOM | 313 | NH2  | ARG | 19 | 5.265  | 12.795 | -3.314 | 1.00 | 0.00 |
| ATOM | 314 | HH21 | ARG | 19 | 4.517  | 12.803 | -2.635 | 1.00 | 0.00 |
| ATOM | 315 | HH22 | ARG | 19 | 5.485  | 13.628 | -3.842 | 1.00 | 0.00 |
| ATOM | 316 | C    | ARG | 19 | 7.274  | 5.134  | -0.305 | 1.00 | 0.00 |
| ATOM | 317 | O    | ARG | 19 | 6.364  | 4.385  | -0.117 | 1.00 | 0.00 |
| ATOM | 318 | N    | CYX | 20 | 8.542  | 4.819  | -0.475 | 1.00 | 0.00 |
| ATOM | 319 | H    | CYX | 20 | 9.242  | 5.512  | -0.699 | 1.00 | 0.00 |
| ATOM | 320 | CA   | CYX | 20 | 8.922  | 3.344  | -0.585 | 1.00 | 0.00 |
| ATOM | 321 | HA   | CYX | 20 | 8.176  | 2.850  | -1.209 | 1.00 | 0.00 |
| ATOM | 322 | CB   | CYX | 20 | 10.286 | 3.103  | -1.182 | 1.00 | 0.00 |
| ATOM | 323 | HB2  | CYX | 20 | 11.035 | 3.652  | -0.611 | 1.00 | 0.00 |
| ATOM | 324 | HB3  | CYX | 20 | 10.514 | 2.038  | -1.151 | 1.00 | 0.00 |
| ATOM | 325 | SG   | CYX | 20 | 10.304 | 3.470  | -2.944 | 1.00 | 0.00 |
| ATOM | 326 | C    | CYX | 20 | 8.676  | 2.634  | 0.732  | 1.00 | 0.00 |
| ATOM | 327 | O    | CYX | 20 | 8.021  | 1.586  | 0.754  | 1.00 | 0.00 |
| ATOM | 328 | N    | PRO | 21 | 9.112  | 3.189  | 1.863  | 1.00 | 0.00 |
| ATOM | 329 | CD   | PRO | 21 | 10.201 | 4.166  | 2.030  | 1.00 | 0.00 |
| ATOM | 330 | HD2  | PRO | 21 | 9.876  | 5.138  | 1.656  | 1.00 | 0.00 |
| ATOM | 331 | HD3  | PRO | 21 | 11.074 | 3.835  | 1.468  | 1.00 | 0.00 |



|      |     |     |     |    |        |       |       |      |      |
|------|-----|-----|-----|----|--------|-------|-------|------|------|
| ATOM | 332 | CG  | PRO | 21 | 10.437 | 4.169 | 3.488 | 1.00 | 0.00 |
| ATOM | 333 | HG2 | PRO | 21 | 10.661 | 5.193 | 3.788 | 1.00 | 0.00 |
| ATOM | 334 | HG3 | PRO | 21 | 11.300 | 3.535 | 3.688 | 1.00 | 0.00 |
| ATOM | 335 | CB  | PRO | 21 | 9.287  | 3.679 | 4.146 | 1.00 | 0.00 |
| ATOM | 336 | HB2 | PRO | 21 | 8.556  | 4.464 | 4.341 | 1.00 | 0.00 |
| ATOM | 337 | HB3 | PRO | 21 | 9.543  | 3.181 | 5.081 | 1.00 | 0.00 |
| ATOM | 338 | CA  | PRO | 21 | 8.704  | 2.656 | 3.147 | 1.00 | 0.00 |
| ATOM | 339 | HA  | PRO | 21 | 9.176  | 1.678 | 3.239 | 1.00 | 0.00 |
| ATOM | 340 | C   | PRO | 21 | 7.224  | 2.517 | 3.345 | 1.00 | 0.00 |
| ATOM | 341 | O   | PRO | 21 | 6.740  | 1.481 | 3.883 | 1.00 | 0.00 |
| ATOM | 342 | N   | SER | 22 | 6.411  | 3.484 | 2.881 | 1.00 | 0.00 |
| ATOM | 343 | H   | SER | 22 | 6.796  | 4.292 | 2.412 | 1.00 | 0.00 |
| ATOM | 344 | CA  | SER | 22 | 5.046  | 3.443 | 3.103 | 1.00 | 0.00 |
| ATOM | 345 | HA  | SER | 22 | 4.861  | 3.159 | 4.139 | 1.00 | 0.00 |
| ATOM | 346 | CB  | SER | 22 | 4.382  | 4.804 | 2.841 | 1.00 | 0.00 |
| ATOM | 347 | HB2 | SER | 22 | 4.664  | 5.206 | 1.867 | 1.00 | 0.00 |
| ATOM | 348 | HB3 | SER | 22 | 3.296  | 4.738 | 2.905 | 1.00 | 0.00 |
| ATOM | 349 | OG  | SER | 22 | 4.857  | 5.648 | 3.848 | 1.00 | 0.00 |
| ATOM | 350 | HG  | SER | 22 | 4.475  | 6.523 | 3.739 | 1.00 | 0.00 |
| ATOM | 351 | C   | SER | 22 | 4.342  | 2.320 | 2.237 | 1.00 | 0.00 |
| ATOM | 352 | O   | SER | 22 | 3.405  | 1.752 | 2.682 | 1.00 | 0.00 |
| ATOM | 353 | N   | LEU | 23 | 4.858  | 2.187 | 1.039 | 1.00 | 0.00 |

|      |     |      |     |    |       |        |        |      |      |
|------|-----|------|-----|----|-------|--------|--------|------|------|
| ATOM | 354 | H    | LEU | 23 | 5.599 | 2.811  | 0.751  | 1.00 | 0.00 |
| ATOM | 355 | CA   | LEU | 23 | 4.376 | 1.181  | 0.073  | 1.00 | 0.00 |
| ATOM | 356 | HA   | LEU | 23 | 3.297 | 1.304  | -0.022 | 1.00 | 0.00 |
| ATOM | 357 | CB   | LEU | 23 | 4.992 | 1.277  | -1.293 | 1.00 | 0.00 |
| ATOM | 358 | HB2  | LEU | 23 | 5.999 | 1.655  | -1.119 | 1.00 | 0.00 |
| ATOM | 359 | HB3  | LEU | 23 | 5.046 | 0.344  | -1.853 | 1.00 | 0.00 |
| ATOM | 360 | CG   | LEU | 23 | 4.187 | 2.314  | -2.101 | 1.00 | 0.00 |
| ATOM | 361 | HG   | LEU | 23 | 4.038 | 3.227  | -1.524 | 1.00 | 0.00 |
| ATOM | 362 | CD1  | LEU | 23 | 4.986 | 2.621  | -3.314 | 1.00 | 0.00 |
| ATOM | 363 | HD11 | LEU | 23 | 5.134 | 1.709  | -3.892 | 1.00 | 0.00 |
| ATOM | 364 | HD12 | LEU | 23 | 4.456 | 3.354  | -3.923 | 1.00 | 0.00 |
| ATOM | 365 | HD13 | LEU | 23 | 5.954 | 3.026  | -3.019 | 1.00 | 0.00 |
| ATOM | 366 | CD2  | LEU | 23 | 2.807 | 1.883  | -2.374 | 1.00 | 0.00 |
| ATOM | 367 | HD21 | LEU | 23 | 2.284 | 1.719  | -1.432 | 1.00 | 0.00 |
| ATOM | 368 | HD22 | LEU | 23 | 2.291 | 2.655  | -2.946 | 1.00 | 0.00 |
| ATOM | 369 | HD23 | LEU | 23 | 2.822 | 0.956  | -2.947 | 1.00 | 0.00 |
| ATOM | 370 | C    | LEU | 23 | 4.708 | -0.183 | 0.735  | 1.00 | 0.00 |
| ATOM | 371 | O    | LEU | 23 | 3.884 | -1.075 | 0.554  | 1.00 | 0.00 |
| ATOM | 372 | N    | ARG | 24 | 5.869 | -0.344 | 1.299  | 1.00 | 0.00 |
| ATOM | 373 | H    | ARG | 24 | 6.561 | 0.391  | 1.326  | 1.00 | 0.00 |
| ATOM | 374 | CA   | ARG | 24 | 6.171 | -1.643 | 2.018  | 1.00 | 0.00 |
| ATOM | 375 | HA   | ARG | 24 | 6.212 | -2.463 | 1.302  | 1.00 | 0.00 |

|      |     |      |     |    |        |        |       |      |      |
|------|-----|------|-----|----|--------|--------|-------|------|------|
| ATOM | 376 | CB   | ARG | 24 | 7.487  | -1.551 | 2.715 | 1.00 | 0.00 |
| ATOM | 377 | HB2  | ARG | 24 | 8.264  | -1.426 | 1.961 | 1.00 | 0.00 |
| ATOM | 378 | HB3  | ARG | 24 | 7.469  | -0.676 | 3.365 | 1.00 | 0.00 |
| ATOM | 379 | CG   | ARG | 24 | 7.781  | -2.805 | 3.552 | 1.00 | 0.00 |
| ATOM | 380 | HG2  | ARG | 24 | 7.017  | -2.899 | 4.323 | 1.00 | 0.00 |
| ATOM | 381 | HG3  | ARG | 24 | 7.748  | -3.678 | 2.900 | 1.00 | 0.00 |
| ATOM | 382 | CD   | ARG | 24 | 9.150  | -2.712 | 4.204 | 1.00 | 0.00 |
| ATOM | 383 | HD2  | ARG | 24 | 9.136  | -1.849 | 4.870 | 1.00 | 0.00 |
| ATOM | 384 | HD3  | ARG | 24 | 9.295  | -3.620 | 4.789 | 1.00 | 0.00 |
| ATOM | 385 | NE   | ARG | 24 | 10.269 | -2.569 | 3.277 | 1.00 | 0.00 |
| ATOM | 386 | HE   | ARG | 24 | 10.547 | -1.624 | 3.051 | 1.00 | 0.00 |
| ATOM | 387 | CZ   | ARG | 24 | 10.956 | -3.585 | 2.735 | 1.00 | 0.00 |
| ATOM | 388 | NH1  | ARG | 24 | 10.617 | -4.876 | 2.942 | 1.00 | 0.00 |
| ATOM | 389 | HH11 | ARG | 24 | 9.821  | -5.099 | 3.522 | 1.00 | 0.00 |
| ATOM | 390 | HH12 | ARG | 24 | 11.160 | -5.612 | 2.515 | 1.00 | 0.00 |
| ATOM | 391 | NH2  | ARG | 24 | 11.995 | -3.298 | 1.942 | 1.00 | 0.00 |
| ATOM | 392 | HH21 | ARG | 24 | 12.241 | -2.334 | 1.767 | 1.00 | 0.00 |
| ATOM | 393 | HH22 | ARG | 24 | 12.527 | -4.046 | 1.522 | 1.00 | 0.00 |
| ATOM | 394 | C    | ARG | 24 | 5.116  | -1.867 | 3.119 | 1.00 | 0.00 |
| ATOM | 395 | O    | ARG | 24 | 4.544  | -3.004 | 3.290 | 1.00 | 0.00 |
| ATOM | 396 | N    | GLN | 25 | 4.810  | -0.843 | 3.915 | 1.00 | 0.00 |
| ATOM | 397 | H    | GLN | 25 | 5.330  | 0.023  | 3.907 | 1.00 | 0.00 |

|      |     |      |     |    |        |        |       |      |      |
|------|-----|------|-----|----|--------|--------|-------|------|------|
| ATOM | 398 | CA   | GLN | 25 | 3.721  | -0.999 | 4.909 | 1.00 | 0.00 |
| ATOM | 399 | HA   | GLN | 25 | 3.922  | -1.864 | 5.541 | 1.00 | 0.00 |
| ATOM | 400 | CB   | GLN | 25 | 3.613  | 0.261  | 5.812 | 1.00 | 0.00 |
| ATOM | 401 | HB2  | GLN | 25 | 3.395  | 1.124  | 5.182 | 1.00 | 0.00 |
| ATOM | 402 | HB3  | GLN | 25 | 2.797  | 0.114  | 6.519 | 1.00 | 0.00 |
| ATOM | 403 | CG   | GLN | 25 | 4.916  | 0.506  | 6.580 | 1.00 | 0.00 |
| ATOM | 404 | HG2  | GLN | 25 | 5.318  | -0.464 | 6.872 | 1.00 | 0.00 |
| ATOM | 405 | HG3  | GLN | 25 | 5.634  | 1.019  | 5.939 | 1.00 | 0.00 |
| ATOM | 406 | CD   | GLN | 25 | 4.700  | 1.345  | 7.841 | 1.00 | 0.00 |
| ATOM | 407 | OE1  | GLN | 25 | 4.561  | 2.591  | 7.793 | 1.00 | 0.00 |
| ATOM | 408 | NE2  | GLN | 25 | 4.698  | 0.666  | 8.990 | 1.00 | 0.00 |
| ATOM | 409 | HE21 | GLN | 25 | 4.560  | 1.156  | 9.862 | 1.00 | 0.00 |
| ATOM | 410 | HE22 | GLN | 25 | 4.833  | -0.334 | 8.982 | 1.00 | 0.00 |
| ATOM | 411 | C    | GLN | 25 | 2.360  | -1.290 | 4.343 | 1.00 | 0.00 |
| ATOM | 412 | O    | GLN | 25 | 1.552  | -2.057 | 4.861 | 1.00 | 0.00 |
| ATOM | 413 | N    | ALA | 26 | 2.039  | -0.760 | 3.115 | 1.00 | 0.00 |
| ATOM | 414 | H    | ALA | 26 | 2.671  | -0.114 | 2.663 | 1.00 | 0.00 |
| ATOM | 415 | CA   | ALA | 26 | 0.838  | -1.087 | 2.458 | 1.00 | 0.00 |
| ATOM | 416 | HA   | ALA | 26 | 0.010  | -0.858 | 3.129 | 1.00 | 0.00 |
| ATOM | 417 | CB   | ALA | 26 | 0.705  | -0.236 | 1.221 | 1.00 | 0.00 |
| ATOM | 418 | HB1  | ALA | 26 | 1.522  | -0.460 | 0.535 | 1.00 | 0.00 |
| ATOM | 419 | HB2  | ALA | 26 | -0.247 | -0.449 | 0.733 | 1.00 | 0.00 |

|      |     |      |     |    |        |        |        |      |      |
|------|-----|------|-----|----|--------|--------|--------|------|------|
| ATOM | 420 | HB3  | ALA | 26 | 0.743  | 0.818  | 1.498  | 1.00 | 0.00 |
| ATOM | 421 | C    | ALA | 26 | 0.726  | -2.591 | 2.004  | 1.00 | 0.00 |
| ATOM | 422 | O    | ALA | 26 | -0.402 | -3.073 | 2.031  | 1.00 | 0.00 |
| ATOM | 423 | N    | VAL | 27 | 1.825  | -3.087 | 1.556  | 1.00 | 0.00 |
| ATOM | 424 | H    | VAL | 27 | 2.641  | -2.495 | 1.490  | 1.00 | 0.00 |
| ATOM | 425 | CA   | VAL | 27 | 1.945  | -4.549 | 1.096  | 1.00 | 0.00 |
| ATOM | 426 | HA   | VAL | 27 | 1.170  | -4.678 | 0.340  | 1.00 | 0.00 |
| ATOM | 427 | CB   | VAL | 27 | 3.251  | -4.955 | 0.512  | 1.00 | 0.00 |
| ATOM | 428 | HB   | VAL | 27 | 4.054  | -4.696 | 1.201  | 1.00 | 0.00 |
| ATOM | 429 | CG1  | VAL | 27 | 3.253  | -6.473 | 0.270  | 1.00 | 0.00 |
| ATOM | 430 | HG11 | VAL | 27 | 2.450  | -6.732 | -0.420 | 1.00 | 0.00 |
| ATOM | 431 | HG12 | VAL | 27 | 4.209  | -6.772 | -0.158 | 1.00 | 0.00 |
| ATOM | 432 | HG13 | VAL | 27 | 3.100  | -6.992 | 1.216  | 1.00 | 0.00 |
| ATOM | 433 | CG2  | VAL | 27 | 3.530  | -4.294 | -0.866 | 1.00 | 0.00 |
| ATOM | 434 | HG21 | VAL | 27 | 3.540  | -3.209 | -0.754 | 1.00 | 0.00 |
| ATOM | 435 | HG22 | VAL | 27 | 4.497  | -4.629 | -1.241 | 1.00 | 0.00 |
| ATOM | 436 | HG23 | VAL | 27 | 2.749  | -4.579 | -1.571 | 1.00 | 0.00 |
| ATOM | 437 | C    | VAL | 27 | 1.672  | -5.375 | 2.371  | 1.00 | 0.00 |
| ATOM | 438 | O    | VAL | 27 | 0.771  | -6.249 | 2.335  | 1.00 | 0.00 |
| ATOM | 439 | N    | GLN | 28 | 2.304  | -5.014 | 3.490  | 1.00 | 0.00 |
| ATOM | 440 | H    | GLN | 28 | 3.008  | -4.290 | 3.484  | 1.00 | 0.00 |
| ATOM | 441 | CA   | GLN | 28 | 2.068  | -5.751 | 4.748  | 1.00 | 0.00 |

|      |     |      |     |    |        |        |       |      |      |
|------|-----|------|-----|----|--------|--------|-------|------|------|
| ATOM | 442 | HA   | GLN | 28 | 2.262  | -6.814 | 4.610 | 1.00 | 0.00 |
| ATOM | 443 | CB   | GLN | 28 | 2.995  | -5.228 | 5.799 | 1.00 | 0.00 |
| ATOM | 444 | HB2  | GLN | 28 | 2.872  | -4.145 | 5.837 | 1.00 | 0.00 |
| ATOM | 445 | HB3  | GLN | 28 | 2.690  | -5.661 | 6.752 | 1.00 | 0.00 |
| ATOM | 446 | CG   | GLN | 28 | 4.389  | -5.549 | 5.545 | 1.00 | 0.00 |
| ATOM | 447 | HG2  | GLN | 28 | 4.553  | -6.601 | 5.777 | 1.00 | 0.00 |
| ATOM | 448 | HG3  | GLN | 28 | 4.640  | -5.364 | 4.500 | 1.00 | 0.00 |
| ATOM | 449 | CD   | GLN | 28 | 5.311  | -4.704 | 6.426 | 1.00 | 0.00 |
| ATOM | 450 | OE1  | GLN | 28 | 4.846  | -3.922 | 7.239 | 1.00 | 0.00 |
| ATOM | 451 | NE2  | GLN | 28 | 6.606  | -4.850 | 6.243 | 1.00 | 0.00 |
| ATOM | 452 | HE21 | GLN | 28 | 7.255  | -4.314 | 6.800 | 1.00 | 0.00 |
| ATOM | 453 | HE22 | GLN | 28 | 6.944  | -5.497 | 5.545 | 1.00 | 0.00 |
| ATOM | 454 | C    | GLN | 28 | 0.643  | -5.672 | 5.129 | 1.00 | 0.00 |
| ATOM | 455 | O    | GLN | 28 | -0.001 | -6.652 | 5.576 | 1.00 | 0.00 |
| ATOM | 456 | N    | SER | 29 | 0.045  | -4.464 | 5.126 | 1.00 | 0.00 |
| ATOM | 457 | H    | SER | 29 | 0.578  | -3.630 | 4.925 | 1.00 | 0.00 |
| ATOM | 458 | CA   | SER | 29 | -1.337 | -4.320 | 5.458 | 1.00 | 0.00 |
| ATOM | 459 | HA   | SER | 29 | -1.546 | -4.751 | 6.437 | 1.00 | 0.00 |
| ATOM | 460 | CB   | SER | 29 | -1.672 | -2.841 | 5.498 | 1.00 | 0.00 |
| ATOM | 461 | HB2  | SER | 29 | -1.466 | -2.380 | 4.532 | 1.00 | 0.00 |
| ATOM | 462 | HB3  | SER | 29 | -2.723 | -2.697 | 5.752 | 1.00 | 0.00 |
| ATOM | 463 | OG   | SER | 29 | -0.871 | -2.248 | 6.477 | 1.00 | 0.00 |

|      |     |     |     |    |        |         |       |      |      |
|------|-----|-----|-----|----|--------|---------|-------|------|------|
| ATOM | 464 | HG  | SER | 29 | -1.064 | -1.308  | 6.522 | 1.00 | 0.00 |
| ATOM | 465 | C   | SER | 29 | -2.347 | -4.989  | 4.573 | 1.00 | 0.00 |
| ATOM | 466 | O   | SER | 29 | -3.437 | -5.435  | 5.006 | 1.00 | 0.00 |
| ATOM | 467 | N   | ALA | 30 | -2.038 | -5.009  | 3.268 | 1.00 | 0.00 |
| ATOM | 468 | H   | ALA | 30 | -1.252 | -4.486  | 2.910 | 1.00 | 0.00 |
| ATOM | 469 | CA  | ALA | 30 | -2.876 | -5.698  | 2.334 | 1.00 | 0.00 |
| ATOM | 470 | HA  | ALA | 30 | -3.886 | -5.306  | 2.457 | 1.00 | 0.00 |
| ATOM | 471 | CB  | ALA | 30 | -2.421 | -5.426  | 0.917 | 1.00 | 0.00 |
| ATOM | 472 | HB1 | ALA | 30 | -1.415 | -5.821  | 0.776 | 1.00 | 0.00 |
| ATOM | 473 | HB2 | ALA | 30 | -3.103 | -5.909  | 0.217 | 1.00 | 0.00 |
| ATOM | 474 | HB3 | ALA | 30 | -2.418 | -4.351  | 0.736 | 1.00 | 0.00 |
| ATOM | 475 | C   | ALA | 30 | -2.939 | -7.202  | 2.609 | 1.00 | 0.00 |
| ATOM | 476 | O   | ALA | 30 | -3.936 | -7.801  | 2.391 | 1.00 | 0.00 |
| ATOM | 477 | N   | GLN | 31 | -1.881 | -7.740  | 3.102 | 1.00 | 0.00 |
| ATOM | 478 | H   | GLN | 31 | -1.039 | -7.198  | 3.232 | 1.00 | 0.00 |
| ATOM | 479 | CA  | GLN | 31 | -1.866 | -9.197  | 3.503 | 1.00 | 0.00 |
| ATOM | 480 | HA  | GLN | 31 | -2.110 | -9.824  | 2.645 | 1.00 | 0.00 |
| ATOM | 481 | CB  | GLN | 31 | -0.534 | -9.566  | 3.990 | 1.00 | 0.00 |
| ATOM | 482 | HB2 | GLN | 31 | -0.270 | -8.903  | 4.814 | 1.00 | 0.00 |
| ATOM | 483 | HB3 | GLN | 31 | -0.568 | -10.595 | 4.348 | 1.00 | 0.00 |
| ATOM | 484 | CG  | GLN | 31 | 0.477  | -9.450  | 2.922 | 1.00 | 0.00 |
| ATOM | 485 | HG2 | GLN | 31 | 0.148  | -10.099 | 2.110 | 1.00 | 0.00 |

|      |     |      |     |    |        |         |        |      |      |
|------|-----|------|-----|----|--------|---------|--------|------|------|
| ATOM | 486 | HG3  | GLN | 31 | 0.511  | -8.418  | 2.570  | 1.00 | 0.00 |
| ATOM | 487 | CD   | GLN | 31 | 1.845  | -9.858  | 3.331  | 1.00 | 0.00 |
| ATOM | 488 | OE1  | GLN | 31 | 2.803  | -9.117  | 3.231  | 1.00 | 0.00 |
| ATOM | 489 | NE2  | GLN | 31 | 1.944  | -11.088 | 3.774  | 1.00 | 0.00 |
| ATOM | 490 | HE21 | GLN | 31 | 2.841  | -11.443 | 4.072  | 1.00 | 0.00 |
| ATOM | 491 | HE22 | GLN | 31 | 1.122  | -11.674 | 3.815  | 1.00 | 0.00 |
| ATOM | 492 | C    | GLN | 31 | -2.855 | -9.511  | 4.601  | 1.00 | 0.00 |
| ATOM | 493 | O    | GLN | 31 | -3.387 | -10.593 | 4.633  | 1.00 | 0.00 |
| ATOM | 494 | N    | GLN | 32 | -3.144 | -8.564  | 5.476  | 1.00 | 0.00 |
| ATOM | 495 | H    | GLN | 32 | -2.665 | -7.675  | 5.442  | 1.00 | 0.00 |
| ATOM | 496 | CA   | GLN | 32 | -4.126 | -8.773  | 6.514  | 1.00 | 0.00 |
| ATOM | 497 | HA   | GLN | 32 | -3.918 | -9.704  | 7.041  | 1.00 | 0.00 |
| ATOM | 498 | CB   | GLN | 32 | -4.082 | -7.617  | 7.523  | 1.00 | 0.00 |
| ATOM | 499 | HB2  | GLN | 32 | -4.215 | -6.682  | 6.978  | 1.00 | 0.00 |
| ATOM | 500 | HB3  | GLN | 32 | -4.904 | -7.746  | 8.227  | 1.00 | 0.00 |
| ATOM | 501 | CG   | GLN | 32 | -2.777 | -7.578  | 8.276  | 1.00 | 0.00 |
| ATOM | 502 | HG2  | GLN | 32 | -2.251 | -8.529  | 8.202  | 1.00 | 0.00 |
| ATOM | 503 | HG3  | GLN | 32 | -2.156 | -6.786  | 7.857  | 1.00 | 0.00 |
| ATOM | 504 | CD   | GLN | 32 | -3.025 | -7.277  | 9.728  | 1.00 | 0.00 |
| ATOM | 505 | OE1  | GLN | 32 | -3.372 | -6.152  | 10.091 | 1.00 | 0.00 |
| ATOM | 506 | NE2  | GLN | 32 | -2.880 | -8.288  | 10.563 | 1.00 | 0.00 |
| ATOM | 507 | HE21 | GLN | 32 | -3.033 | -8.148  | 11.551 | 1.00 | 0.00 |



|      |     |      |     |    |        |         |        |      |      |
|------|-----|------|-----|----|--------|---------|--------|------|------|
| ATOM | 508 | HE22 | GLN | 32 | -2.617 | -9.197  | 10.210 | 1.00 | 0.00 |
| ATOM | 509 | C    | GLN | 32 | -5.536 | -8.886  | 6.038  | 1.00 | 0.00 |
| ATOM | 510 | O    | GLN | 32 | -6.368 | -9.547  | 6.683  | 1.00 | 0.00 |
| ATOM | 511 | N    | GLN | 33 | -5.825 | -8.256  | 4.912  | 1.00 | 0.00 |
| ATOM | 512 | H    | GLN | 33 | -5.137 | -7.656  | 4.480  | 1.00 | 0.00 |
| ATOM | 513 | CA   | GLN | 33 | -7.131 | -8.348  | 4.303  | 1.00 | 0.00 |
| ATOM | 514 | HA   | GLN | 33 | -7.911 | -8.331  | 5.064  | 1.00 | 0.00 |
| ATOM | 515 | CB   | GLN | 33 | -7.331 | -7.145  | 3.369  | 1.00 | 0.00 |
| ATOM | 516 | HB2  | GLN | 33 | -6.736 | -7.330  | 2.474  | 1.00 | 0.00 |
| ATOM | 517 | HB3  | GLN | 33 | -8.388 | -7.117  | 3.102  | 1.00 | 0.00 |
| ATOM | 518 | CG   | GLN | 33 | -6.921 | -5.791  | 3.989  | 1.00 | 0.00 |
| ATOM | 519 | HG2  | GLN | 33 | -7.324 | -5.705  | 4.998  | 1.00 | 0.00 |
| ATOM | 520 | HG3  | GLN | 33 | -5.832 | -5.763  | 4.029  | 1.00 | 0.00 |
| ATOM | 521 | CD   | GLN | 33 | -7.405 | -4.613  | 3.174  | 1.00 | 0.00 |
| ATOM | 522 | OE1  | GLN | 33 | -6.688 | -4.078  | 2.308  | 1.00 | 0.00 |
| ATOM | 523 | NE2  | GLN | 33 | -8.650 | -4.215  | 3.424  | 1.00 | 0.00 |
| ATOM | 524 | HE21 | GLN | 33 | -9.039 | -3.433  | 2.916  | 1.00 | 0.00 |
| ATOM | 525 | HE22 | GLN | 33 | -9.201 | -4.696  | 4.120  | 1.00 | 0.00 |
| ATOM | 526 | C    | GLN | 33 | -7.284 | -9.685  | 3.547  | 1.00 | 0.00 |
| ATOM | 527 | O    | GLN | 33 | -8.300 | -9.917  | 2.934  | 1.00 | 0.00 |
| ATOM | 528 | N    | GLN | 34 | -6.244 | -10.513 | 3.513  | 1.00 | 0.00 |
| ATOM | 529 | H    | GLN | 34 | -5.387 | -10.244 | 3.974  | 1.00 | 0.00 |

|      |     |      |     |    |        |         |        |      |      |
|------|-----|------|-----|----|--------|---------|--------|------|------|
| ATOM | 530 | CA   | GLN | 34 | -6.282 | -11.802 | 2.813  | 1.00 | 0.00 |
| ATOM | 531 | HA   | GLN | 34 | -7.263 | -11.969 | 2.367  | 1.00 | 0.00 |
| ATOM | 532 | CB   | GLN | 34 | -5.227 | -11.787 | 1.690  | 1.00 | 0.00 |
| ATOM | 533 | HB2  | GLN | 34 | -4.249 | -11.713 | 2.165  | 1.00 | 0.00 |
| ATOM | 534 | HB3  | GLN | 34 | -5.303 | -12.737 | 1.161  | 1.00 | 0.00 |
| ATOM | 535 | CG   | GLN | 34 | -5.397 | -10.650 | 0.710  | 1.00 | 0.00 |
| ATOM | 536 | HG2  | GLN | 34 | -6.402 | -10.673 | 0.288  | 1.00 | 0.00 |
| ATOM | 537 | HG3  | GLN | 34 | -5.260 | -9.724  | 1.269  | 1.00 | 0.00 |
| ATOM | 538 | CD   | GLN | 34 | -4.398 | -10.683 | -0.421 | 1.00 | 0.00 |
| ATOM | 539 | OE1  | GLN | 34 | -4.514 | -11.467 | -1.362 | 1.00 | 0.00 |
| ATOM | 540 | NE2  | GLN | 34 | -3.431 | -9.802  | -0.348 | 1.00 | 0.00 |
| ATOM | 541 | HE21 | GLN | 34 | -2.728 | -9.768  | -1.072 | 1.00 | 0.00 |
| ATOM | 542 | HE22 | GLN | 34 | -3.394 | -9.161  | 0.431  | 1.00 | 0.00 |
| ATOM | 543 | C    | GLN | 34 | -6.016 | -13.035 | 3.651  | 1.00 | 0.00 |
| ATOM | 544 | O    | GLN | 34 | -6.436 | -14.132 | 3.264  | 1.00 | 0.00 |
| ATOM | 545 | N    | GLY | 35 | -5.249 | -12.920 | 4.731  | 1.00 | 0.00 |
| ATOM | 546 | H    | GLY | 35 | -4.996 | -12.017 | 5.106  | 1.00 | 0.00 |
| ATOM | 547 | CA   | GLY | 35 | -4.747 | -14.122 | 5.410  | 1.00 | 0.00 |
| ATOM | 548 | HA2  | GLY | 35 | -4.172 | -13.827 | 6.287  | 1.00 | 0.00 |
| ATOM | 549 | HA3  | GLY | 35 | -5.590 | -14.740 | 5.719  | 1.00 | 0.00 |
| ATOM | 550 | C    | GLY | 35 | -3.849 | -14.936 | 4.477  | 1.00 | 0.00 |
| ATOM | 551 | O    | GLY | 35 | -3.157 | -14.353 | 3.652  | 1.00 | 0.00 |

|      |     |      |     |    |        |         |       |      |      |
|------|-----|------|-----|----|--------|---------|-------|------|------|
| ATOM | 552 | N    | GLN | 36 | -3.895 | -16.266 | 4.577 | 1.00 | 0.00 |
| ATOM | 553 | H    | GLN | 36 | -4.649 | -16.692 | 5.097 | 1.00 | 0.00 |
| ATOM | 554 | CA   | GLN | 36 | -2.818 | -17.136 | 4.066 | 1.00 | 0.00 |
| ATOM | 555 | HA   | GLN | 36 | -1.905 | -16.918 | 4.619 | 1.00 | 0.00 |
| ATOM | 556 | CB   | GLN | 36 | -3.139 | -18.650 | 4.214 | 1.00 | 0.00 |
| ATOM | 557 | HB2  | GLN | 36 | -4.219 | -18.723 | 4.342 | 1.00 | 0.00 |
| ATOM | 558 | HB3  | GLN | 36 | -2.853 | -19.117 | 3.272 | 1.00 | 0.00 |
| ATOM | 559 | CG   | GLN | 36 | -2.438 | -19.366 | 5.373 | 1.00 | 0.00 |
| ATOM | 560 | HG2  | GLN | 36 | -2.704 | -18.879 | 6.311 | 1.00 | 0.00 |
| ATOM | 561 | HG3  | GLN | 36 | -2.782 | -20.400 | 5.390 | 1.00 | 0.00 |
| ATOM | 562 | CD   | GLN | 36 | -0.923 | -19.360 | 5.234 | 1.00 | 0.00 |
| ATOM | 563 | OE1  | GLN | 36 | -0.355 | -20.018 | 4.354 | 1.00 | 0.00 |
| ATOM | 564 | NE2  | GLN | 36 | -0.262 | -18.599 | 6.098 | 1.00 | 0.00 |
| ATOM | 565 | HE21 | GLN | 36 | 0.746  | -18.552 | 6.057 | 1.00 | 0.00 |
| ATOM | 566 | HE22 | GLN | 36 | -0.771 | -18.070 | 6.792 | 1.00 | 0.00 |
| ATOM | 567 | C    | GLN | 36 | -2.438 | -16.811 | 2.627 | 1.00 | 0.00 |
| ATOM | 568 | O    | GLN | 36 | -3.150 | -17.120 | 1.678 | 1.00 | 0.00 |
| ATOM | 569 | N    | VAL | 37 | -1.297 | -16.155 | 2.497 | 1.00 | 0.00 |
| ATOM | 570 | H    | VAL | 37 | -0.829 | -15.828 | 3.329 | 1.00 | 0.00 |
| ATOM | 571 | CA   | VAL | 37 | -0.741 | -15.799 | 1.215 | 1.00 | 0.00 |
| ATOM | 572 | HA   | VAL | 37 | -1.252 | -16.276 | 0.378 | 1.00 | 0.00 |
| ATOM | 573 | CB   | VAL | 37 | -0.751 | -14.240 | 0.988 | 1.00 | 0.00 |

|      |     |      |     |    |        |         |        |      |      |
|------|-----|------|-----|----|--------|---------|--------|------|------|
| ATOM | 574 | HB   | VAL | 37 | -1.780 | -13.940 | 0.789  | 1.00 | 0.00 |
| ATOM | 575 | CG1  | VAL | 37 | -0.217 | -13.460 | 2.184  | 1.00 | 0.00 |
| ATOM | 576 | HG11 | VAL | 37 | 0.812  | -13.758 | 2.383  | 1.00 | 0.00 |
| ATOM | 577 | HG12 | VAL | 37 | -0.250 | -12.392 | 1.966  | 1.00 | 0.00 |
| ATOM | 578 | HG13 | VAL | 37 | -0.832 | -13.670 | 3.059  | 1.00 | 0.00 |
| ATOM | 579 | CG2  | VAL | 37 | -0.006 | -13.851 | -0.259 | 1.00 | 0.00 |
| ATOM | 580 | HG21 | VAL | 37 | -0.471 | -14.324 | -1.124 | 1.00 | 0.00 |
| ATOM | 581 | HG22 | VAL | 37 | -0.037 | -12.768 | -0.379 | 1.00 | 0.00 |
| ATOM | 582 | HG23 | VAL | 37 | 1.031  | -14.178 | -0.181 | 1.00 | 0.00 |
| ATOM | 583 | C    | VAL | 37 | 0.658  | -16.446 | 1.213  | 1.00 | 0.00 |
| ATOM | 584 | O    | VAL | 37 | 1.497  | -16.215 | 2.103  | 1.00 | 0.00 |
| ATOM | 585 | N    | GLY | 38 | 0.877  | -17.267 | 0.217  | 1.00 | 0.00 |
| ATOM | 586 | H    | GLY | 38 | 0.140  | -17.541 | -0.418 | 1.00 | 0.00 |
| ATOM | 587 | CA   | GLY | 38 | 2.217  | -17.812 | 0.001  | 1.00 | 0.00 |
| ATOM | 588 | HA2  | GLY | 38 | 2.456  | -18.374 | 0.904  | 1.00 | 0.00 |
| ATOM | 589 | HA3  | GLY | 38 | 2.124  | -18.499 | -0.840 | 1.00 | 0.00 |
| ATOM | 590 | C    | GLY | 38 | 3.339  | -16.832 | -0.283 | 1.00 | 0.00 |
| ATOM | 591 | O    | GLY | 38 | 3.097  | -15.688 | -0.663 | 1.00 | 0.00 |
| ATOM | 592 | N    | PRO | 39 | 4.582  | -17.266 | -0.120 | 1.00 | 0.00 |
| ATOM | 593 | CD   | PRO | 39 | 4.998  | -18.616 | 0.360  | 1.00 | 0.00 |
| ATOM | 594 | HD2  | PRO | 39 | 4.476  | -19.384 | -0.211 | 1.00 | 0.00 |
| ATOM | 595 | HD3  | PRO | 39 | 4.753  | -18.720 | 1.417  | 1.00 | 0.00 |

|      |     |     |     |    |       |         |        |      |      |
|------|-----|-----|-----|----|-------|---------|--------|------|------|
| ATOM | 596 | CG  | PRO | 39 | 6.450 | -18.620 | 0.117  | 1.00 | 0.00 |
| ATOM | 597 | HG2 | PRO | 39 | 6.642 | -19.090 | -0.848 | 1.00 | 0.00 |
| ATOM | 598 | HG3 | PRO | 39 | 6.935 | -19.196 | 0.904  | 1.00 | 0.00 |
| ATOM | 599 | CB  | PRO | 39 | 6.910 | -17.210 | 0.133  | 1.00 | 0.00 |
| ATOM | 600 | HB2 | PRO | 39 | 7.779 | -17.025 | -0.499 | 1.00 | 0.00 |
| ATOM | 601 | HB3 | PRO | 39 | 7.135 | -16.909 | 1.156  | 1.00 | 0.00 |
| ATOM | 602 | CA  | PRO | 39 | 5.728 | -16.432 | -0.383 | 1.00 | 0.00 |
| ATOM | 603 | HA  | PRO | 39 | 5.638 | -15.550 | 0.251  | 1.00 | 0.00 |
| ATOM | 604 | C   | PRO | 39 | 5.854 | -16.005 | -1.816 | 1.00 | 0.00 |
| ATOM | 605 | O   | PRO | 39 | 6.392 | -14.855 | -2.061 | 1.00 | 0.00 |
| ATOM | 606 | N   | GLN | 40 | 5.347 | -16.760 | -2.803 | 1.00 | 0.00 |
| ATOM | 607 | H   | GLN | 40 | 4.924 | -17.660 | -2.627 | 1.00 | 0.00 |
| ATOM | 608 | CA  | GLN | 40 | 5.476 | -16.333 | -4.138 | 1.00 | 0.00 |
| ATOM | 609 | HA  | GLN | 40 | 6.481 | -15.946 | -4.308 | 1.00 | 0.00 |
| ATOM | 610 | CB  | GLN | 40 | 5.236 | -17.483 | -5.083 | 1.00 | 0.00 |
| ATOM | 611 | HB2 | GLN | 40 | 4.261 | -17.921 | -4.870 | 1.00 | 0.00 |
| ATOM | 612 | HB3 | GLN | 40 | 5.249 | -17.110 | -6.107 | 1.00 | 0.00 |
| ATOM | 613 | CG  | GLN | 40 | 6.314 | -18.541 | -4.915 | 1.00 | 0.00 |
| ATOM | 614 | HG2 | GLN | 40 | 7.295 | -18.183 | -5.227 | 1.00 | 0.00 |
| ATOM | 615 | HG3 | GLN | 40 | 6.323 | -18.735 | -3.843 | 1.00 | 0.00 |
| ATOM | 616 | CD  | GLN | 40 | 6.014 | -19.860 | -5.652 | 1.00 | 0.00 |
| ATOM | 617 | OE1 | GLN | 40 | 5.479 | -20.827 | -5.090 | 1.00 | 0.00 |

|      |     |      |     |    |        |         |        |      |      |
|------|-----|------|-----|----|--------|---------|--------|------|------|
| ATOM | 618 | NE2  | GLN | 40 | 6.253  | -19.848 | -6.882 | 1.00 | 0.00 |
| ATOM | 619 | HE21 | GLN | 40 | 6.082  | -20.676 | -7.435 | 1.00 | 0.00 |
| ATOM | 620 | HE22 | GLN | 40 | 6.615  | -19.010 | -7.315 | 1.00 | 0.00 |
| ATOM | 621 | C    | GLN | 40 | 4.498  | -15.158 | -4.359 | 1.00 | 0.00 |
| ATOM | 622 | O    | GLN | 40 | 4.820  | -14.155 | -5.014 | 1.00 | 0.00 |
| ATOM | 623 | N    | GLN | 41 | 3.271  | -15.324 | -3.871 | 1.00 | 0.00 |
| ATOM | 624 | H    | GLN | 41 | 2.980  | -16.211 | -3.485 | 1.00 | 0.00 |
| ATOM | 625 | CA   | GLN | 41 | 2.282  | -14.237 | -3.944 | 1.00 | 0.00 |
| ATOM | 626 | HA   | GLN | 41 | 2.182  | -13.914 | -4.981 | 1.00 | 0.00 |
| ATOM | 627 | CB   | GLN | 41 | 0.924  | -14.675 | -3.442 | 1.00 | 0.00 |
| ATOM | 628 | HB2  | GLN | 41 | 0.661  | -15.637 | -3.881 | 1.00 | 0.00 |
| ATOM | 629 | HB3  | GLN | 41 | 0.943  | -14.764 | -2.356 | 1.00 | 0.00 |
| ATOM | 630 | CG   | GLN | 41 | -0.112 | -13.632 | -3.848 | 1.00 | 0.00 |
| ATOM | 631 | HG2  | GLN | 41 | 0.095  | -12.739 | -3.258 | 1.00 | 0.00 |
| ATOM | 632 | HG3  | GLN | 41 | 0.034  | -13.410 | -4.905 | 1.00 | 0.00 |
| ATOM | 633 | CD   | GLN | 41 | -1.546 | -14.026 | -3.634 | 1.00 | 0.00 |
| ATOM | 634 | OE1  | GLN | 41 | -1.896 | -15.211 | -3.525 | 1.00 | 0.00 |
| ATOM | 635 | NE2  | GLN | 41 | -2.398 | -13.026 | -3.587 | 1.00 | 0.00 |
| ATOM | 636 | HE21 | GLN | 41 | -3.381 | -13.210 | -3.446 | 1.00 | 0.00 |
| ATOM | 637 | HE22 | GLN | 41 | -2.066 | -12.078 | -3.692 | 1.00 | 0.00 |
| ATOM | 638 | C    | GLN | 41 | 2.708  | -12.995 | -3.177 | 1.00 | 0.00 |
| ATOM | 639 | O    | GLN | 41 | 2.553  | -11.868 | -3.679 | 1.00 | 0.00 |

|      |     |      |     |    |       |         |        |      |      |
|------|-----|------|-----|----|-------|---------|--------|------|------|
| ATOM | 640 | N    | VAL | 42 | 3.315 | -13.197 | -2.040 | 1.00 | 0.00 |
| ATOM | 641 | H    | VAL | 42 | 3.437 | -14.110 | -1.626 | 1.00 | 0.00 |
| ATOM | 642 | CA   | VAL | 42 | 3.856 | -12.005 | -1.306 | 1.00 | 0.00 |
| ATOM | 643 | HA   | VAL | 42 | 3.096 | -11.251 | -1.097 | 1.00 | 0.00 |
| ATOM | 644 | CB   | VAL | 42 | 4.520 | -12.411 | 0.014  | 1.00 | 0.00 |
| ATOM | 645 | HB   | VAL | 42 | 5.182 | -13.253 | -0.187 | 1.00 | 0.00 |
| ATOM | 646 | CG1  | VAL | 42 | 5.327 | -11.264 | 0.639  | 1.00 | 0.00 |
| ATOM | 647 | HG11 | VAL | 42 | 4.665 | -10.421 | 0.840  | 1.00 | 0.00 |
| ATOM | 648 | HG12 | VAL | 42 | 5.777 | -11.602 | 1.572  | 1.00 | 0.00 |
| ATOM | 649 | HG13 | VAL | 42 | 6.111 | -10.953 | -0.051 | 1.00 | 0.00 |
| ATOM | 650 | CG2  | VAL | 42 | 3.441 | -12.929 | 0.926  | 1.00 | 0.00 |
| ATOM | 651 | HG21 | VAL | 42 | 2.956 | -13.789 | 0.464  | 1.00 | 0.00 |
| ATOM | 652 | HG22 | VAL | 42 | 3.881 | -13.227 | 1.877  | 1.00 | 0.00 |
| ATOM | 653 | HG23 | VAL | 42 | 2.702 | -12.145 | 1.097  | 1.00 | 0.00 |
| ATOM | 654 | C    | VAL | 42 | 4.891 | -11.301 | -2.177 | 1.00 | 0.00 |
| ATOM | 655 | O    | VAL | 42 | 4.907 | -10.044 | -2.273 | 1.00 | 0.00 |
| ATOM | 656 | N    | GLY | 43 | 5.846 | -12.013 | -2.766 | 1.00 | 0.00 |
| ATOM | 657 | H    | GLY | 43 | 5.918 | -13.009 | -2.619 | 1.00 | 0.00 |
| ATOM | 658 | CA   | GLY | 43 | 6.782 | -11.395 | -3.612 | 1.00 | 0.00 |
| ATOM | 659 | HA2  | GLY | 43 | 7.343 | -10.671 | -3.022 | 1.00 | 0.00 |
| ATOM | 660 | HA3  | GLY | 43 | 7.459 | -12.163 | -3.984 | 1.00 | 0.00 |
| ATOM | 661 | C    | GLY | 43 | 6.159 | -10.696 | -4.772 | 1.00 | 0.00 |

|      |     |     |     |    |       |         |         |      |      |
|------|-----|-----|-----|----|-------|---------|---------|------|------|
| ATOM | 662 | O   | GLY | 43 | 6.550 | -9.567  | -5.047  | 1.00 | 0.00 |
| ATOM | 663 | N   | HIE | 44 | 5.176 | -11.244 | -5.407  | 1.00 | 0.00 |
| ATOM | 664 | H   | HIE | 44 | 5.000 | -12.229 | -5.271  | 1.00 | 0.00 |
| ATOM | 665 | CA  | HIE | 44 | 4.411 | -10.541 | -6.425  | 1.00 | 0.00 |
| ATOM | 666 | HA  | HIE | 44 | 5.074 | -10.159 | -7.201  | 1.00 | 0.00 |
| ATOM | 667 | CB  | HIE | 44 | 3.406 | -11.510 | -7.071  | 1.00 | 0.00 |
| ATOM | 668 | HB2 | HIE | 44 | 3.816 | -12.408 | -7.534  | 1.00 | 0.00 |
| ATOM | 669 | HB3 | HIE | 44 | 2.760 | -11.792 | -6.239  | 1.00 | 0.00 |
| ATOM | 670 | CG  | HIE | 44 | 2.528 | -10.866 | -8.093  | 1.00 | 0.00 |
| ATOM | 671 | ND1 | HIE | 44 | 3.015 | -10.469 | -9.318  | 1.00 | 0.00 |
| ATOM | 672 | CE1 | HIE | 44 | 2.041 | -9.922  | -10.023 | 1.00 | 0.00 |
| ATOM | 673 | HE1 | HIE | 44 | 2.204 | -9.594  | -11.050 | 1.00 | 0.00 |
| ATOM | 674 | NE2 | HIE | 44 | 0.961 | -9.881  | -9.261  | 1.00 | 0.00 |
| ATOM | 675 | HE2 | HIE | 44 | 0.059 | -9.516  | -9.533  | 1.00 | 0.00 |
| ATOM | 676 | CD2 | HIE | 44 | 1.256 | -10.416 | -8.032  | 1.00 | 0.00 |
| ATOM | 677 | HD2 | HIE | 44 | 0.505 | -10.412 | -7.242  | 1.00 | 0.00 |
| ATOM | 678 | C   | HIE | 44 | 3.756 | -9.249  | -5.921  | 1.00 | 0.00 |
| ATOM | 679 | O   | HIE | 44 | 3.746 | -8.268  | -6.643  | 1.00 | 0.00 |
| ATOM | 680 | N   | MET | 45 | 3.204 | -9.255  | -4.738  | 1.00 | 0.00 |
| ATOM | 681 | H   | MET | 45 | 3.096 | -10.101 | -4.198  | 1.00 | 0.00 |
| ATOM | 682 | CA  | MET | 45 | 2.598 | -8.014  | -4.221  | 1.00 | 0.00 |
| ATOM | 683 | HA  | MET | 45 | 1.893 | -7.613  | -4.950  | 1.00 | 0.00 |



|      |     |     |     |    |        |         |        |      |      |
|------|-----|-----|-----|----|--------|---------|--------|------|------|
| ATOM | 684 | CB  | MET | 45 | 1.854  | -8.291  | -2.928 | 1.00 | 0.00 |
| ATOM | 685 | HB2 | MET | 45 | 2.555  | -8.753  | -2.234 | 1.00 | 0.00 |
| ATOM | 686 | HB3 | MET | 45 | 1.521  | -7.334  | -2.525 | 1.00 | 0.00 |
| ATOM | 687 | CG  | MET | 45 | 0.650  | -9.208  | -3.121 | 1.00 | 0.00 |
| ATOM | 688 | HG2 | MET | 45 | -0.119 | -8.614  | -3.617 | 1.00 | 0.00 |
| ATOM | 689 | HG3 | MET | 45 | 0.971  | -10.011 | -3.784 | 1.00 | 0.00 |
| ATOM | 690 | SD  | MET | 45 | -0.027 | -9.916  | -1.625 | 1.00 | 0.00 |
| ATOM | 691 | CE  | MET | 45 | -0.229 | -8.336  | -0.750 | 1.00 | 0.00 |
| ATOM | 692 | HE1 | MET | 45 | -0.901 | -7.690  | -1.316 | 1.00 | 0.00 |
| ATOM | 693 | HE2 | MET | 45 | -0.649 | -8.519  | 0.239  | 1.00 | 0.00 |
| ATOM | 694 | HE3 | MET | 45 | 0.741  | -7.850  | -0.648 | 1.00 | 0.00 |
| ATOM | 695 | C   | MET | 45 | 3.638  | -6.922  | -4.079 | 1.00 | 0.00 |
| ATOM | 696 | O   | MET | 45 | 3.373  | -5.754  | -4.339 | 1.00 | 0.00 |
| ATOM | 697 | N   | TYR | 46 | 4.831  | -7.247  | -3.625 | 1.00 | 0.00 |
| ATOM | 698 | H   | TYR | 46 | 5.011  | -8.153  | -3.218 | 1.00 | 0.00 |
| ATOM | 699 | CA  | TYR | 46 | 5.887  | -6.268  | -3.606 | 1.00 | 0.00 |
| ATOM | 700 | HA  | TYR | 46 | 5.527  | -5.360  | -3.121 | 1.00 | 0.00 |
| ATOM | 701 | CB  | TYR | 46 | 7.114  | -6.778  | -2.844 | 1.00 | 0.00 |
| ATOM | 702 | HB2 | TYR | 46 | 7.293  | -7.805  | -3.160 | 1.00 | 0.00 |
| ATOM | 703 | HB3 | TYR | 46 | 7.954  | -6.153  | -3.147 | 1.00 | 0.00 |
| ATOM | 704 | CG  | TYR | 46 | 6.970  | -6.732  | -1.361 | 1.00 | 0.00 |
| ATOM | 705 | CD1 | TYR | 46 | 7.181  | -5.569  | -0.639 | 1.00 | 0.00 |

|      |     |         |    |       |        |         |      |      |
|------|-----|---------|----|-------|--------|---------|------|------|
| ATOM | 706 | HD1 TYR | 46 | 7.574 | -4.683 | -1.138  | 1.00 | 0.00 |
| ATOM | 707 | CE1 TYR | 46 | 6.890 | -5.530 | 0.730   | 1.00 | 0.00 |
| ATOM | 708 | HE1 TYR | 46 | 7.032 | -4.586 | 1.257   | 1.00 | 0.00 |
| ATOM | 709 | CZ TYR  | 46 | 6.678 | -6.640 | 1.410   | 1.00 | 0.00 |
| ATOM | 710 | OH TYR  | 46 | 6.416 | -6.641 | 2.810   | 1.00 | 0.00 |
| ATOM | 711 | HH TYR  | 46 | 6.412 | -5.760 | 3.191   | 1.00 | 0.00 |
| ATOM | 712 | CE2 TYR | 46 | 6.464 | -7.817 | 0.722   | 1.00 | 0.00 |
| ATOM | 713 | HE2 TYR | 46 | 6.180 | -8.722 | 1.258   | 1.00 | 0.00 |
| ATOM | 714 | CD2 TYR | 46 | 6.608 | -7.844 | -0.625  | 1.00 | 0.00 |
| ATOM | 715 | HD2 TYR | 46 | 6.436 | -8.770 | -1.173  | 1.00 | 0.00 |
| ATOM | 716 | C TYR   | 46 | 6.305 | -5.790 | -4.980  | 1.00 | 0.00 |
| ATOM | 717 | O TYR   | 46 | 6.645 | -4.597 | -5.213  | 1.00 | 0.00 |
| ATOM | 718 | N ARG   | 47 | 6.326 | -6.686 | -5.957  | 1.00 | 0.00 |
| ATOM | 719 | H ARG   | 47 | 6.295 | -7.669 | -5.729  | 1.00 | 0.00 |
| ATOM | 720 | CA ARG  | 47 | 6.555 | -6.309 | -7.335  | 1.00 | 0.00 |
| ATOM | 721 | HA ARG  | 47 | 7.478 | -5.735 | -7.413  | 1.00 | 0.00 |
| ATOM | 722 | CB ARG  | 47 | 6.677 | -7.555 | -8.219  | 1.00 | 0.00 |
| ATOM | 723 | HB2 ARG | 47 | 7.410 | -8.223 | -7.767  | 1.00 | 0.00 |
| ATOM | 724 | HB3 ARG | 47 | 5.705 | -8.048 | -8.248  | 1.00 | 0.00 |
| ATOM | 725 | CG ARG  | 47 | 7.115 | -7.208 | -9.645  | 1.00 | 0.00 |
| ATOM | 726 | HG2 ARG | 47 | 6.514 | -6.379 | -10.020 | 1.00 | 0.00 |
| ATOM | 727 | HG3 ARG | 47 | 8.166 | -6.922 | -9.644  | 1.00 | 0.00 |

|      |     |      |     |    |        |        |         |      |      |
|------|-----|------|-----|----|--------|--------|---------|------|------|
| ATOM | 728 | CD   | ARG | 47 | 6.919  | -8.431 | -10.549 | 1.00 | 0.00 |
| ATOM | 729 | HD2  | ARG | 47 | 7.699  | -9.133 | -10.255 | 1.00 | 0.00 |
| ATOM | 730 | HD3  | ARG | 47 | 5.944  | -8.836 | -10.277 | 1.00 | 0.00 |
| ATOM | 731 | NE   | ARG | 47 | 6.967  | -8.256 | -12.029 | 1.00 | 0.00 |
| ATOM | 732 | HE   | ARG | 47 | 6.078  | -8.098 | -12.483 | 1.00 | 0.00 |
| ATOM | 733 | CZ   | ARG | 47 | 8.074  | -8.301 | -12.786 | 1.00 | 0.00 |
| ATOM | 734 | NH1  | ARG | 47 | 9.293  | -8.460 | -12.255 | 1.00 | 0.00 |
| ATOM | 735 | HH11 | ARG | 47 | 9.396  | -8.550 | -11.255 | 1.00 | 0.00 |
| ATOM | 736 | HH12 | ARG | 47 | 10.103 | -8.489 | -12.858 | 1.00 | 0.00 |
| ATOM | 737 | NH2  | ARG | 47 | 7.967  | -8.175 | -14.105 | 1.00 | 0.00 |
| ATOM | 738 | HH21 | ARG | 47 | 7.057  | -8.047 | -14.525 | 1.00 | 0.00 |
| ATOM | 739 | HH22 | ARG | 47 | 8.796  | -8.208 | -14.681 | 1.00 | 0.00 |
| ATOM | 740 | C    | ARG | 47 | 5.550  | -5.325 | -7.860  | 1.00 | 0.00 |
| ATOM | 741 | O    | ARG | 47 | 5.917  | -4.327 | -8.503  | 1.00 | 0.00 |
| ATOM | 742 | N    | VAL | 48 | 4.290  | -5.570 | -7.612  | 1.00 | 0.00 |
| ATOM | 743 | H    | VAL | 48 | 4.045  | -6.392 | -7.080  | 1.00 | 0.00 |
| ATOM | 744 | CA   | VAL | 48 | 3.209  | -4.671 | -8.043  | 1.00 | 0.00 |
| ATOM | 745 | HA   | VAL | 48 | 3.233  | -4.586 | -9.130  | 1.00 | 0.00 |
| ATOM | 746 | CB   | VAL | 48 | 1.833  | -5.203 | -7.623  | 1.00 | 0.00 |
| ATOM | 747 | HB   | VAL | 48 | 1.879  | -5.464 | -6.566  | 1.00 | 0.00 |
| ATOM | 748 | CG1  | VAL | 48 | 0.744  | -4.195 | -7.842  | 1.00 | 0.00 |
| ATOM | 749 | HG11 | VAL | 48 | 0.697  | -3.934 | -8.899  | 1.00 | 0.00 |

|      |     |          |    |        |        |        |      |      |
|------|-----|----------|----|--------|--------|--------|------|------|
| ATOM | 750 | HG12 VAL | 48 | -0.211 | -4.617 | -7.530 | 1.00 | 0.00 |
| ATOM | 751 | HG13 VAL | 48 | 0.953  | -3.300 | -7.256 | 1.00 | 0.00 |
| ATOM | 752 | CG2 VAL  | 48 | 1.575  | -6.423 | -8.487 | 1.00 | 0.00 |
| ATOM | 753 | HG21 VAL | 48 | 2.354  | -7.164 | -8.311 | 1.00 | 0.00 |
| ATOM | 754 | HG22 VAL | 48 | 0.604  | -6.849 | -8.234 | 1.00 | 0.00 |
| ATOM | 755 | HG23 VAL | 48 | 1.581  | -6.132 | -9.538 | 1.00 | 0.00 |
| ATOM | 756 | C VAL    | 48 | 3.461  | -3.347 | -7.330 | 1.00 | 0.00 |
| ATOM | 757 | O VAL    | 48 | 3.408  | -2.238 | -7.965 | 1.00 | 0.00 |
| ATOM | 758 | N ALA    | 49 | 3.628  | -3.391 | -6.001 | 1.00 | 0.00 |
| ATOM | 759 | H ALA    | 49 | 3.601  | -4.260 | -5.487 | 1.00 | 0.00 |
| ATOM | 760 | CA ALA   | 49 | 3.802  | -2.151 | -5.254 | 1.00 | 0.00 |
| ATOM | 761 | HA ALA   | 49 | 2.903  | -1.549 | -5.394 | 1.00 | 0.00 |
| ATOM | 762 | CB ALA   | 49 | 3.996  | -2.405 | -3.743 | 1.00 | 0.00 |
| ATOM | 763 | HB1 ALA  | 49 | 4.897  | -2.998 | -3.587 | 1.00 | 0.00 |
| ATOM | 764 | HB2 ALA  | 49 | 4.094  | -1.452 | -3.224 | 1.00 | 0.00 |
| ATOM | 765 | HB3 ALA  | 49 | 3.133  | -2.944 | -3.351 | 1.00 | 0.00 |
| ATOM | 766 | C ALA    | 49 | 4.966  | -1.370 | -5.773 | 1.00 | 0.00 |
| ATOM | 767 | O ALA    | 49 | 4.911  | -0.083 | -5.803 | 1.00 | 0.00 |
| ATOM | 768 | N SER    | 50 | 6.065  | -2.008 | -6.162 | 1.00 | 0.00 |
| ATOM | 769 | H SER    | 50 | 6.120  | -2.978 | -5.886 | 1.00 | 0.00 |
| ATOM | 770 | CA SER   | 50 | 7.236  | -1.392 | -6.735 | 1.00 | 0.00 |
| ATOM | 771 | HA SER   | 50 | 7.585  | -0.595 | -6.079 | 1.00 | 0.00 |

|      |     |     |     |    |       |        |         |      |      |
|------|-----|-----|-----|----|-------|--------|---------|------|------|
| ATOM | 772 | CB  | SER | 50 | 8.386 | -2.427 | -6.916  | 1.00 | 0.00 |
| ATOM | 773 | HB2 | SER | 50 | 9.348 | -1.919 | -6.975  | 1.00 | 0.00 |
| ATOM | 774 | HB3 | SER | 50 | 8.397 | -3.131 | -6.085  | 1.00 | 0.00 |
| ATOM | 775 | OG  | SER | 50 | 8.149 | -3.121 | -8.114  | 1.00 | 0.00 |
| ATOM | 776 | HG  | SER | 50 | 8.844 | -3.768 | -8.252  | 1.00 | 0.00 |
| ATOM | 777 | C   | SER | 50 | 6.998 | -0.537 | -7.988  | 1.00 | 0.00 |
| ATOM | 778 | O   | SER | 50 | 7.750 | 0.393  | -8.229  | 1.00 | 0.00 |
| ATOM | 779 | N   | ARG | 51 | 5.926 | -0.818 | -8.706  | 1.00 | 0.00 |
| ATOM | 780 | H   | ARG | 51 | 5.286 | -1.529 | -8.382  | 1.00 | 0.00 |
| ATOM | 781 | CA  | ARG | 51 | 5.640 | -0.166 | -9.930  | 1.00 | 0.00 |
| ATOM | 782 | HA  | ARG | 51 | 6.580 | 0.134  | -10.393 | 1.00 | 0.00 |
| ATOM | 783 | CB  | ARG | 51 | 4.888 | -1.037 | -10.893 | 1.00 | 0.00 |
| ATOM | 784 | HB2 | ARG | 51 | 4.019 | -1.434 | -10.368 | 1.00 | 0.00 |
| ATOM | 785 | HB3 | ARG | 51 | 4.556 | -0.406 | -11.718 | 1.00 | 0.00 |
| ATOM | 786 | CG  | ARG | 51 | 5.730 | -2.200 | -11.445 | 1.00 | 0.00 |
| ATOM | 787 | HG2 | ARG | 51 | 6.656 | -1.795 | -11.851 | 1.00 | 0.00 |
| ATOM | 788 | HG3 | ARG | 51 | 5.960 | -2.881 | -10.626 | 1.00 | 0.00 |
| ATOM | 789 | CD  | ARG | 51 | 4.993 | -2.946 | -12.525 | 1.00 | 0.00 |
| ATOM | 790 | HD2 | ARG | 51 | 4.021 | -3.255 | -12.140 | 1.00 | 0.00 |
| ATOM | 791 | HD3 | ARG | 51 | 4.850 | -2.282 | -13.378 | 1.00 | 0.00 |
| ATOM | 792 | NE  | ARG | 51 | 5.732 | -4.154 | -12.980 | 1.00 | 0.00 |
| ATOM | 793 | HE  | ARG | 51 | 5.640 | -5.025 | -12.477 | 1.00 | 0.00 |

|      |     |      |     |    |       |        |         |      |      |
|------|-----|------|-----|----|-------|--------|---------|------|------|
| ATOM | 794 | CZ   | ARG | 51 | 6.555 | -4.107 | -14.020 | 1.00 | 0.00 |
| ATOM | 795 | NH1  | ARG | 51 | 6.707 | -3.030 | -14.695 | 1.00 | 0.00 |
| ATOM | 796 | HH11 | ARG | 51 | 6.194 | -2.199 | -14.437 | 1.00 | 0.00 |
| ATOM | 797 | HH12 | ARG | 51 | 7.338 | -3.016 | -15.483 | 1.00 | 0.00 |
| ATOM | 798 | NH2  | ARG | 51 | 7.188 | -5.196 | -14.385 | 1.00 | 0.00 |
| ATOM | 799 | HH21 | ARG | 51 | 7.044 | -6.055 | -13.874 | 1.00 | 0.00 |
| ATOM | 800 | HH22 | ARG | 51 | 7.816 | -5.170 | -15.175 | 1.00 | 0.00 |
| ATOM | 801 | C    | ARG | 51 | 4.807 | 1.077  | -9.685  | 1.00 | 0.00 |
| ATOM | 802 | O    | ARG | 51 | 4.660 | 1.893  | -10.577 | 1.00 | 0.00 |
| ATOM | 803 | N    | ILE | 52 | 4.215 | 1.214  | -8.478  | 1.00 | 0.00 |
| ATOM | 804 | H    | ILE | 52 | 4.343 | 0.529  | -7.748  | 1.00 | 0.00 |
| ATOM | 805 | CA   | ILE | 52 | 3.229 | 2.236  | -8.285  | 1.00 | 0.00 |
| ATOM | 806 | HA   | ILE | 52 | 2.551 | 2.329  | -9.134  | 1.00 | 0.00 |
| ATOM | 807 | CB   | ILE | 52 | 2.413 | 1.963  | -7.002  | 1.00 | 0.00 |
| ATOM | 808 | HB   | ILE | 52 | 3.100 | 1.739  | -6.186  | 1.00 | 0.00 |
| ATOM | 809 | CG2  | ILE | 52 | 1.547 | 3.213  | -6.626  | 1.00 | 0.00 |
| ATOM | 810 | HG21 | ILE | 52 | 0.859 | 3.438  | -7.442  | 1.00 | 0.00 |
| ATOM | 811 | HG22 | ILE | 52 | 0.979 | 3.003  | -5.720  | 1.00 | 0.00 |
| ATOM | 812 | HG23 | ILE | 52 | 2.199 | 4.070  | -6.455  | 1.00 | 0.00 |
| ATOM | 813 | CG1  | ILE | 52 | 1.575 | 0.705  | -7.204  | 1.00 | 0.00 |
| ATOM | 814 | HG12 | ILE | 52 | 0.897 | 0.876  | -8.041  | 1.00 | 0.00 |
| ATOM | 815 | HG13 | ILE | 52 | 2.246 | -0.119 | -7.444  | 1.00 | 0.00 |

|      |     |      |     |    |       |        |         |      |      |
|------|-----|------|-----|----|-------|--------|---------|------|------|
| ATOM | 816 | CD1  | ILE | 52 | 0.766 | 0.356  | -5.956  | 1.00 | 0.00 |
| ATOM | 817 | HD11 | ILE | 52 | 0.093 | 1.180  | -5.716  | 1.00 | 0.00 |
| ATOM | 818 | HD12 | ILE | 52 | 0.182 | -0.546 | -6.141  | 1.00 | 0.00 |
| ATOM | 819 | HD13 | ILE | 52 | 1.443 | 0.185  | -5.120  | 1.00 | 0.00 |
| ATOM | 820 | C    | ILE | 52 | 3.778 | 3.662  | -8.363  | 1.00 | 0.00 |
| ATOM | 821 | O    | ILE | 52 | 3.125 | 4.505  | -8.979  | 1.00 | 0.00 |
| ATOM | 822 | N    | PRO | 53 | 4.929 | 3.891  | -7.824  | 1.00 | 0.00 |
| ATOM | 823 | CD   | PRO | 53 | 5.813 | 3.119  | -6.906  | 1.00 | 0.00 |
| ATOM | 824 | HD2  | PRO | 53 | 6.443 | 2.460  | -7.503  | 1.00 | 0.00 |
| ATOM | 825 | HD3  | PRO | 53 | 5.188 | 2.521  | -6.243  | 1.00 | 0.00 |
| ATOM | 826 | CG   | PRO | 53 | 6.613 | 4.170  | -6.156  | 1.00 | 0.00 |
| ATOM | 827 | HG2  | PRO | 53 | 7.590 | 3.796  | -5.851  | 1.00 | 0.00 |
| ATOM | 828 | HG3  | PRO | 53 | 6.077 | 4.540  | -5.282  | 1.00 | 0.00 |
| ATOM | 829 | CB   | PRO | 53 | 6.737 | 5.230  | -7.190  | 1.00 | 0.00 |
| ATOM | 830 | HB2  | PRO | 53 | 7.537 | 4.925  | -7.864  | 1.00 | 0.00 |
| ATOM | 831 | HB3  | PRO | 53 | 6.968 | 6.210  | -6.773  | 1.00 | 0.00 |
| ATOM | 832 | CA   | PRO | 53 | 5.446 | 5.284  | -7.929  | 1.00 | 0.00 |
| ATOM | 833 | HA   | PRO | 53 | 4.716 | 5.958  | -7.479  | 1.00 | 0.00 |
| ATOM | 834 | C    | PRO | 53 | 5.682 | 5.689  | -9.385  | 1.00 | 0.00 |
| ATOM | 835 | O    | PRO | 53 | 5.219 | 6.768  | -9.763  | 1.00 | 0.00 |
| ATOM | 836 | N    | ALA | 54 | 6.232 | 4.844  | -10.273 | 1.00 | 0.00 |
| ATOM | 837 | H    | ALA | 54 | 6.774 | 4.030  | -10.023 | 1.00 | 0.00 |

|      |     |      |     |    |        |       |         |      |      |
|------|-----|------|-----|----|--------|-------|---------|------|------|
| ATOM | 838 | CA   | ALA | 54 | 6.185  | 5.244 | -11.694 | 1.00 | 0.00 |
| ATOM | 839 | HA   | ALA | 54 | 6.672  | 6.218 | -11.639 | 1.00 | 0.00 |
| ATOM | 840 | CB   | ALA | 54 | 7.023  | 4.335 | -12.550 | 1.00 | 0.00 |
| ATOM | 841 | HB1  | ALA | 54 | 6.543  | 3.359 | -12.622 | 1.00 | 0.00 |
| ATOM | 842 | HB2  | ALA | 54 | 7.123  | 4.765 | -13.547 | 1.00 | 0.00 |
| ATOM | 843 | HB3  | ALA | 54 | 8.010  | 4.222 | -12.103 | 1.00 | 0.00 |
| ATOM | 844 | C    | ALA | 54 | 4.879  | 5.427 | -12.325 | 1.00 | 0.00 |
| ATOM | 845 | O    | ALA | 54 | 4.697  | 6.338 | -13.134 | 1.00 | 0.00 |
| ATOM | 846 | N    | ILE | 55 | 3.897  | 4.600 | -12.039 | 1.00 | 0.00 |
| ATOM | 847 | H    | ILE | 55 | 4.118  | 3.790 | -11.479 | 1.00 | 0.00 |
| ATOM | 848 | CA   | ILE | 55 | 2.564  | 4.708 | -12.593 | 1.00 | 0.00 |
| ATOM | 849 | HA   | ILE | 55 | 2.556  | 4.800 | -13.679 | 1.00 | 0.00 |
| ATOM | 850 | CB   | ILE | 55 | 1.704  | 3.543 | -12.183 | 1.00 | 0.00 |
| ATOM | 851 | HB   | ILE | 55 | 1.861  | 3.374 | -11.118 | 1.00 | 0.00 |
| ATOM | 852 | CG2  | ILE | 55 | 0.218  | 3.775 | -12.447 | 1.00 | 0.00 |
| ATOM | 853 | HG21 | ILE | 55 | 0.059  | 3.944 | -13.512 | 1.00 | 0.00 |
| ATOM | 854 | HG22 | ILE | 55 | -0.349 | 2.900 | -12.130 | 1.00 | 0.00 |
| ATOM | 855 | HG23 | ILE | 55 | -0.119 | 4.648 | -11.888 | 1.00 | 0.00 |
| ATOM | 856 | CG1  | ILE | 55 | 2.253  | 2.331 | -12.867 | 1.00 | 0.00 |
| ATOM | 857 | HG12 | ILE | 55 | 2.051  | 2.421 | -13.935 | 1.00 | 0.00 |
| ATOM | 858 | HG13 | ILE | 55 | 3.330  | 2.304 | -12.702 | 1.00 | 0.00 |
| ATOM | 859 | CD1  | ILE | 55 | 1.649  | 1.094 | -12.357 | 1.00 | 0.00 |



|      |     |      |     |    |       |        |         |      |      |
|------|-----|------|-----|----|-------|--------|---------|------|------|
| ATOM | 860 | HD11 | ILE | 55 | 0.572 | 1.120  | -12.522 | 1.00 | 0.00 |
| ATOM | 861 | HD12 | ILE | 55 | 2.075 | 0.239  | -12.881 | 1.00 | 0.00 |
| ATOM | 862 | HD13 | ILE | 55 | 1.850 | 1.004  | -11.290 | 1.00 | 0.00 |
| ATOM | 863 | C    | ILE | 55 | 1.985 | 6.089  | -12.220 | 1.00 | 0.00 |
| ATOM | 864 | O    | ILE | 55 | 1.374 | 6.748  | -13.061 | 1.00 | 0.00 |
| ATOM | 865 | N    | CYX | 56 | 2.199 | 6.426  | -10.979 | 1.00 | 0.00 |
| ATOM | 866 | H    | CYX | 56 | 2.543 | 5.710  | -10.356 | 1.00 | 0.00 |
| ATOM | 867 | CA   | CYX | 56 | 1.822 | 7.727  | -10.406 | 1.00 | 0.00 |
| ATOM | 868 | HA   | CYX | 56 | 0.841 | 8.030  | -10.773 | 1.00 | 0.00 |
| ATOM | 869 | CB   | CYX | 56 | 1.762 | 7.620  | -8.880  | 1.00 | 0.00 |
| ATOM | 870 | HB2  | CYX | 56 | 2.767 | 7.473  | -8.486  | 1.00 | 0.00 |
| ATOM | 871 | HB3  | CYX | 56 | 1.341 | 8.537  | -8.467  | 1.00 | 0.00 |
| ATOM | 872 | SG   | CYX | 56 | 0.513 | 6.397  | -8.283  | 1.00 | 0.00 |
| ATOM | 873 | C    | CYX | 56 | 2.608 | 8.906  | -10.815 | 1.00 | 0.00 |
| ATOM | 874 | O    | CYX | 56 | 2.293 | 10.010 | -10.391 | 1.00 | 0.00 |
| ATOM | 875 | N    | ASN | 57 | 3.745 | 8.679  | -11.459 | 1.00 | 0.00 |
| ATOM | 876 | H    | ASN | 57 | 4.024 | 7.721  | -11.616 | 1.00 | 0.00 |
| ATOM | 877 | CA   | ASN | 57 | 4.701 | 9.754  | -11.807 | 1.00 | 0.00 |
| ATOM | 878 | HA   | ASN | 57 | 5.567 | 9.354  | -12.335 | 1.00 | 0.00 |
| ATOM | 879 | CB   | ASN | 57 | 3.987 | 10.732 | -12.720 | 1.00 | 0.00 |
| ATOM | 880 | HB2  | ASN | 57 | 2.978 | 10.395 | -12.960 | 1.00 | 0.00 |
| ATOM | 881 | HB3  | ASN | 57 | 3.934 | 11.672 | -12.171 | 1.00 | 0.00 |

|      |     |      |     |    |       |        |         |      |      |
|------|-----|------|-----|----|-------|--------|---------|------|------|
| ATOM | 882 | CG   | ASN | 57 | 4.709 | 10.959 | -13.963 | 1.00 | 0.00 |
| ATOM | 883 | OD1  | ASN | 57 | 5.468 | 10.098 | -14.423 | 1.00 | 0.00 |
| ATOM | 884 | ND2  | ASN | 57 | 4.439 | 12.092 | -14.578 | 1.00 | 0.00 |
| ATOM | 885 | HD21 | ASN | 57 | 4.904 | 12.315 | -15.447 | 1.00 | 0.00 |
| ATOM | 886 | HD22 | ASN | 57 | 3.768 | 12.733 | -14.179 | 1.00 | 0.00 |
| ATOM | 887 | C    | ASN | 57 | 5.323 | 10.348 | -10.599 | 1.00 | 0.00 |
| ATOM | 888 | O    | ASN | 57 | 5.604 | 11.579 | -10.583 | 1.00 | 0.00 |
| ATOM | 889 | N    | LEU | 58 | 5.563 | 9.564  | -9.549  | 1.00 | 0.00 |
| ATOM | 890 | H    | LEU | 58 | 5.310 | 8.590  | -9.636  | 1.00 | 0.00 |
| ATOM | 891 | CA   | LEU | 58 | 6.048 | 10.019 | -8.310  | 1.00 | 0.00 |
| ATOM | 892 | HA   | LEU | 58 | 6.121 | 11.106 | -8.362  | 1.00 | 0.00 |
| ATOM | 893 | CB   | LEU | 58 | 5.182 | 9.646  | -7.114  | 1.00 | 0.00 |
| ATOM | 894 | HB2  | LEU | 58 | 5.124 | 8.558  | -7.137  | 1.00 | 0.00 |
| ATOM | 895 | HB3  | LEU | 58 | 5.718 | 9.963  | -6.220  | 1.00 | 0.00 |
| ATOM | 896 | CG   | LEU | 58 | 3.806 | 10.215 | -7.094  | 1.00 | 0.00 |
| ATOM | 897 | HG   | LEU | 58 | 3.325 | 10.040 | -8.057  | 1.00 | 0.00 |
| ATOM | 898 | CD1  | LEU | 58 | 2.990 | 9.539  | -5.984  | 1.00 | 0.00 |
| ATOM | 899 | HD11 | LEU | 58 | 3.470 | 9.715  | -5.021  | 1.00 | 0.00 |
| ATOM | 900 | HD12 | LEU | 58 | 1.982 | 9.955  | -5.969  | 1.00 | 0.00 |
| ATOM | 901 | HD13 | LEU | 58 | 2.937 | 8.467  | -6.173  | 1.00 | 0.00 |
| ATOM | 902 | CD2  | LEU | 58 | 3.829 | 11.759 | -6.860  | 1.00 | 0.00 |
| ATOM | 903 | HD21 | LEU | 58 | 4.389 | 12.240 | -7.662  | 1.00 | 0.00 |

|      |     |      |     |    |        |        |         |      |      |
|------|-----|------|-----|----|--------|--------|---------|------|------|
| ATOM | 904 | HD22 | LEU | 58 | 2.808  | 12.141 | -6.851  | 1.00 | 0.00 |
| ATOM | 905 | HD23 | LEU | 58 | 4.305  | 11.975 | -5.904  | 1.00 | 0.00 |
| ATOM | 906 | C    | LEU | 58 | 7.456  | 9.540  | -8.103  | 1.00 | 0.00 |
| ATOM | 907 | O    | LEU | 58 | 7.808  | 8.337  | -8.197  | 1.00 | 0.00 |
| ATOM | 908 | N    | GLN | 59 | 8.334  | 10.404 | -7.690  | 1.00 | 0.00 |
| ATOM | 909 | H    | GLN | 59 | 8.092  | 11.384 | -7.639  | 1.00 | 0.00 |
| ATOM | 910 | CA   | GLN | 59 | 9.670  | 9.998  | -7.266  | 1.00 | 0.00 |
| ATOM | 911 | HA   | GLN | 59 | 10.108 | 9.335  | -8.012  | 1.00 | 0.00 |
| ATOM | 912 | CB   | GLN | 59 | 10.587 | 11.235 | -7.104  | 1.00 | 0.00 |
| ATOM | 913 | HB2  | GLN | 59 | 10.137 | 11.894 | -6.361  | 1.00 | 0.00 |
| ATOM | 914 | HB3  | GLN | 59 | 11.557 | 10.892 | -6.745  | 1.00 | 0.00 |
| ATOM | 915 | CG   | GLN | 59 | 10.763 | 11.968 | -8.365  | 1.00 | 0.00 |
| ATOM | 916 | HG2  | GLN | 59 | 9.767  | 12.070 | -8.797  | 1.00 | 0.00 |
| ATOM | 917 | HG3  | GLN | 59 | 11.163 | 12.957 | -8.140  | 1.00 | 0.00 |
| ATOM | 918 | CD   | GLN | 59 | 11.670 | 11.297 | -9.386  | 1.00 | 0.00 |
| ATOM | 919 | OE1  | GLN | 59 | 11.879 | 10.085 | -9.389  | 1.00 | 0.00 |
| ATOM | 920 | NE2  | GLN | 59 | 12.244 | 12.111 | -10.249 | 1.00 | 0.00 |
| ATOM | 921 | HE21 | GLN | 59 | 12.860 | 11.739 | -10.957 | 1.00 | 0.00 |
| ATOM | 922 | HE22 | GLN | 59 | 12.065 | 13.104 | -10.198 | 1.00 | 0.00 |
| ATOM | 923 | C    | GLN | 59 | 9.584  | 9.311  | -5.943  | 1.00 | 0.00 |
| ATOM | 924 | O    | GLN | 59 | 8.753  | 9.636  | -5.127  | 1.00 | 0.00 |
| ATOM | 925 | N    | PRO | 60 | 10.388 | 8.278  | -5.723  | 1.00 | 0.00 |

|      |     |         |    |        |       |         |      |      |
|------|-----|---------|----|--------|-------|---------|------|------|
| ATOM | 926 | CD PRO  | 60 | 10.402 | 7.557 | -4.433  | 1.00 | 0.00 |
| ATOM | 927 | HD2 PRO | 60 | 9.420  | 7.123 | -4.246  | 1.00 | 0.00 |
| ATOM | 928 | HD3 PRO | 60 | 10.652 | 8.250 | -3.629  | 1.00 | 0.00 |
| ATOM | 929 | CG PRO  | 60 | 11.466 | 6.512 | -4.642  | 1.00 | 0.00 |
| ATOM | 930 | HG2 PRO | 60 | 11.009 | 5.582 | -4.979  | 1.00 | 0.00 |
| ATOM | 931 | HG3 PRO | 60 | 12.000 | 6.337 | -3.709  | 1.00 | 0.00 |
| ATOM | 932 | CB PRO  | 60 | 12.371 | 7.075 | -5.672  | 1.00 | 0.00 |
| ATOM | 933 | HB2 PRO | 60 | 12.680 | 6.129 | -6.116  | 1.00 | 0.00 |
| ATOM | 934 | HB3 PRO | 60 | 13.250 | 7.689 | -5.478  | 1.00 | 0.00 |
| ATOM | 935 | CA PRO  | 60 | 11.422 | 7.808 | -6.620  | 1.00 | 0.00 |
| ATOM | 936 | HA PRO  | 60 | 11.827 | 8.586 | -7.268  | 1.00 | 0.00 |
| ATOM | 937 | C PRO   | 60 | 10.648 | 6.824 | -7.446  | 1.00 | 0.00 |
| ATOM | 938 | O PRO   | 60 | 9.632  | 6.295 | -6.992  | 1.00 | 0.00 |
| ATOM | 939 | N MET   | 61 | 11.059 | 6.510 | -8.601  | 1.00 | 0.00 |
| ATOM | 940 | H MET   | 61 | 11.966 | 6.680 | -9.010  | 1.00 | 0.00 |
| ATOM | 941 | CA MET  | 61 | 9.997  | 5.940 | -9.461  | 1.00 | 0.00 |
| ATOM | 942 | HA MET  | 61 | 9.008  | 6.307 | -9.186  | 1.00 | 0.00 |
| ATOM | 943 | CB MET  | 61 | 10.304 | 6.393 | -10.845 | 1.00 | 0.00 |
| ATOM | 944 | HB2 MET | 61 | 11.342 | 6.153 | -11.072 | 1.00 | 0.00 |
| ATOM | 945 | HB3 MET | 61 | 9.649  | 5.868 | -11.541 | 1.00 | 0.00 |
| ATOM | 946 | CG MET  | 61 | 10.090 | 7.892 | -10.982 | 1.00 | 0.00 |
| ATOM | 947 | HG2 MET | 61 | 10.051 | 8.321 | -9.981  | 1.00 | 0.00 |

|      |     |         |    |        |        |         |      |      |
|------|-----|---------|----|--------|--------|---------|------|------|
| ATOM | 948 | HG3 MET | 61 | 10.941 | 8.307  | -11.522 | 1.00 | 0.00 |
| ATOM | 949 | SD MET  | 61 | 8.609  | 8.295  | -11.841 | 1.00 | 0.00 |
| ATOM | 950 | CE MET  | 61 | 8.760  | 7.644  | -13.414 | 1.00 | 0.00 |
| ATOM | 951 | HE1 MET | 61 | 8.888  | 6.564  | -13.350 | 1.00 | 0.00 |
| ATOM | 952 | HE2 MET | 61 | 7.861  | 7.869  | -13.989 | 1.00 | 0.00 |
| ATOM | 953 | HE3 MET | 61 | 9.626  | 8.084  | -13.908 | 1.00 | 0.00 |
| ATOM | 954 | C MET   | 61 | 9.861  | 4.392  | -9.313  | 1.00 | 0.00 |
| ATOM | 955 | O MET   | 61 | 8.920  | 3.760  | -9.801  | 1.00 | 0.00 |
| ATOM | 956 | N ARG   | 62 | 10.734 | 3.835  | -8.514  | 1.00 | 0.00 |
| ATOM | 957 | H ARG   | 62 | 11.450 | 4.396  | -8.075  | 1.00 | 0.00 |
| ATOM | 958 | CA ARG  | 62 | 10.720 | 2.408  | -8.253  | 1.00 | 0.00 |
| ATOM | 959 | HA ARG  | 62 | 9.701  | 2.030  | -8.337  | 1.00 | 0.00 |
| ATOM | 960 | CB ARG  | 62 | 11.606 | 1.661  | -9.264  | 1.00 | 0.00 |
| ATOM | 961 | HB2 ARG | 62 | 11.149 | 1.816  | -10.242 | 1.00 | 0.00 |
| ATOM | 962 | HB3 ARG | 62 | 12.579 | 2.151  | -9.237  | 1.00 | 0.00 |
| ATOM | 963 | CG ARG  | 62 | 11.784 | 0.148  | -9.013  | 1.00 | 0.00 |
| ATOM | 964 | HG2 ARG | 62 | 12.559 | -0.184 | -9.704  | 1.00 | 0.00 |
| ATOM | 965 | HG3 ARG | 62 | 12.145 | 0.052  | -7.989  | 1.00 | 0.00 |
| ATOM | 966 | CD ARG  | 62 | 10.531 | -0.718 | -9.196  | 1.00 | 0.00 |
| ATOM | 967 | HD2 ARG | 62 | 10.767 | -1.739 | -8.896  | 1.00 | 0.00 |
| ATOM | 968 | HD3 ARG | 62 | 9.740  | -0.325 | -8.557  | 1.00 | 0.00 |
| ATOM | 969 | NE ARG  | 62 | 10.046 | -0.735 | -10.593 | 1.00 | 0.00 |

|      |     |      |     |    |        |        |         |      |      |
|------|-----|------|-----|----|--------|--------|---------|------|------|
| ATOM | 970 | HE   | ARG | 62 | 10.136 | 0.149  | -11.074 | 1.00 | 0.00 |
| ATOM | 971 | CZ   | ARG | 62 | 9.506  | -1.773 | -11.255 | 1.00 | 0.00 |
| ATOM | 972 | NH1  | ARG | 62 | 9.320  | -2.983 | -10.695 | 1.00 | 0.00 |
| ATOM | 973 | HH11 | ARG | 62 | 9.591  | -3.139 | -9.735  | 1.00 | 0.00 |
| ATOM | 974 | HH12 | ARG | 62 | 8.909  | -3.729 | -11.238 | 1.00 | 0.00 |
| ATOM | 975 | NH2  | ARG | 62 | 9.151  | -1.589 | -12.535 | 1.00 | 0.00 |
| ATOM | 976 | HH21 | ARG | 62 | 9.293  | -0.689 | -12.971 | 1.00 | 0.00 |
| ATOM | 977 | HH22 | ARG | 62 | 8.743  | -2.351 | -13.057 | 1.00 | 0.00 |
| ATOM | 978 | C    | ARG | 62 | 11.226 | 2.215  | -6.839  | 1.00 | 0.00 |
| ATOM | 979 | O    | ARG | 62 | 12.007 | 3.028  | -6.291  | 1.00 | 0.00 |
| ATOM | 980 | N    | CYX | 63 | 10.701 | 1.192  | -6.200  | 1.00 | 0.00 |
| ATOM | 981 | H    | CYX | 63 | 10.008 | 0.627  | -6.670  | 1.00 | 0.00 |
| ATOM | 982 | CA   | CYX | 63 | 11.113 | 0.806  | -4.896  | 1.00 | 0.00 |
| ATOM | 983 | HA   | CYX | 63 | 11.710 | 1.596  | -4.440  | 1.00 | 0.00 |
| ATOM | 984 | CB   | CYX | 63 | 9.904  | 0.562  | -4.039  | 1.00 | 0.00 |
| ATOM | 985 | HB2  | CYX | 63 | 9.249  | -0.158 | -4.530  | 1.00 | 0.00 |
| ATOM | 986 | HB3  | CYX | 63 | 10.217 | 0.168  | -3.073  | 1.00 | 0.00 |
| ATOM | 987 | SG   | CYX | 63 | 8.973  | 2.112  | -3.917  | 1.00 | 0.00 |
| ATOM | 988 | C    | CYX | 63 | 11.881 | -0.529 | -4.993  | 1.00 | 0.00 |
| ATOM | 989 | O    | CYX | 63 | 11.308 | -1.550 | -5.417  | 1.00 | 0.00 |
| ATOM | 990 | N    | PRO | 64 | 13.147 | -0.529 | -4.576  | 1.00 | 0.00 |
| ATOM | 991 | CD   | PRO | 64 | 13.808 | 0.489  | -3.730  | 1.00 | 0.00 |

|      |      |         |    |        |        |        |      |      |
|------|------|---------|----|--------|--------|--------|------|------|
| ATOM | 992  | HD2 PRO | 64 | 13.086 | 0.886  | -3.015 | 1.00 | 0.00 |
| ATOM | 993  | HD3 PRO | 64 | 14.174 | 1.298  | -4.362 | 1.00 | 0.00 |
| ATOM | 994  | CG PRO  | 64 | 14.918 | -0.266 | -3.068 | 1.00 | 0.00 |
| ATOM | 995  | HG2 PRO | 64 | 14.609 | -0.542 | -2.060 | 1.00 | 0.00 |
| ATOM | 996  | HG3 PRO | 64 | 15.800 | 0.372  | -3.016 | 1.00 | 0.00 |
| ATOM | 997  | CB PRO  | 64 | 15.183 | -1.481 | -3.913 | 1.00 | 0.00 |
| ATOM | 998  | HB2 PRO | 64 | 15.546 | -2.308 | -3.303 | 1.00 | 0.00 |
| ATOM | 999  | HB3 PRO | 64 | 15.908 | -1.262 | -4.697 | 1.00 | 0.00 |
| ATOM | 1000 | CA PRO  | 64 | 13.841 | -1.846 | -4.534 | 1.00 | 0.00 |
| ATOM | 1001 | HA PRO  | 64 | 13.909 | -2.187 | -5.567 | 1.00 | 0.00 |
| ATOM | 1002 | C PRO   | 64 | 13.160 | -2.943 | -3.671 | 1.00 | 0.00 |
| ATOM | 1003 | O PRO   | 64 | 13.052 | -4.132 | -4.076 | 1.00 | 0.00 |
| ATOM | 1004 | N PHE   | 65 | 12.735 | -2.547 | -2.480 | 1.00 | 0.00 |
| ATOM | 1005 | H PHE   | 65 | 12.745 | -1.561 | -2.260 | 1.00 | 0.00 |
| ATOM | 1006 | CA PHE  | 65 | 12.377 | -3.483 | -1.431 | 1.00 | 0.00 |
| ATOM | 1007 | HA PHE  | 65 | 12.283 | -2.960 | -0.479 | 1.00 | 0.00 |
| ATOM | 1008 | CB PHE  | 65 | 11.030 | -4.150 | -1.761 | 1.00 | 0.00 |
| ATOM | 1009 | HB2 PHE | 65 | 11.090 | -4.687 | -2.708 | 1.00 | 0.00 |
| ATOM | 1010 | HB3 PHE | 65 | 10.753 | -4.843 | -0.967 | 1.00 | 0.00 |
| ATOM | 1011 | CG PHE  | 65 | 9.876  | -3.156 | -1.895 | 1.00 | 0.00 |
| ATOM | 1012 | CD1 PHE | 65 | 9.676  | -2.159 | -0.931 | 1.00 | 0.00 |
| ATOM | 1013 | HD1 PHE | 65 | 10.366 | -2.092 | -0.090 | 1.00 | 0.00 |

|      |      |     |     |    |        |        |        |      |      |
|------|------|-----|-----|----|--------|--------|--------|------|------|
| ATOM | 1014 | CE1 | PHE | 65 | 8.635  | -1.278 | -1.033 | 1.00 | 0.00 |
| ATOM | 1015 | HE1 | PHE | 65 | 8.485  | -0.496 | -0.288 | 1.00 | 0.00 |
| ATOM | 1016 | CZ  | PHE | 65 | 7.778  | -1.388 | -2.086 | 1.00 | 0.00 |
| ATOM | 1017 | HZ  | PHE | 65 | 6.937  | -0.698 | -2.157 | 1.00 | 0.00 |
| ATOM | 1018 | CE2 | PHE | 65 | 7.957  | -2.332 | -3.033 | 1.00 | 0.00 |
| ATOM | 1019 | HE2 | PHE | 65 | 7.254  | -2.399 | -3.864 | 1.00 | 0.00 |
| ATOM | 1020 | CD2 | PHE | 65 | 9.014  | -3.204 | -2.957 | 1.00 | 0.00 |
| ATOM | 1021 | HD2 | PHE | 65 | 9.171  | -3.940 | -3.745 | 1.00 | 0.00 |
| ATOM | 1022 | C   | PHE | 65 | 13.492 | -4.528 | -1.139 | 1.00 | 0.00 |
| ATOM | 1023 | O   | PHE | 65 | 13.186 | -5.621 | -0.692 | 1.00 | 0.00 |
| ATOM | 1024 | OXT | PHE | 65 | 14.670 | -4.255 | -1.357 | 1.00 | 0.00 |
| TER  |      |     |     |    |        |        |        |      |      |
| ATOM | 1025 | N   | GLN | 66 | 8.447  | 7.866  | 14.308 | 1.00 | 0.00 |
| ATOM | 1026 | H1  | GLN | 66 | 7.470  | 8.050  | 14.126 | 1.00 | 0.00 |
| ATOM | 1027 | H2  | GLN | 66 | 8.820  | 8.619  | 14.868 | 1.00 | 0.00 |
| ATOM | 1028 | H3  | GLN | 66 | 8.545  | 6.910  | 14.617 | 1.00 | 0.00 |
| ATOM | 1029 | CA  | GLN | 66 | 9.185  | 7.939  | 13.005 | 1.00 | 0.00 |
| ATOM | 1030 | HA  | GLN | 66 | 9.939  | 8.724  | 13.065 | 1.00 | 0.00 |
| ATOM | 1031 | CB  | GLN | 66 | 9.872  | 6.633  | 12.673 | 1.00 | 0.00 |
| ATOM | 1032 | HB2 | GLN | 66 | 10.296 | 6.254  | 13.602 | 1.00 | 0.00 |
| ATOM | 1033 | HB3 | GLN | 66 | 9.099  | 5.950  | 12.322 | 1.00 | 0.00 |
| ATOM | 1034 | CG  | GLN | 66 | 10.959 | 6.741  | 11.631 | 1.00 | 0.00 |



|      |      |      |     |    |        |        |        |      |      |
|------|------|------|-----|----|--------|--------|--------|------|------|
| ATOM | 1035 | HG2  | GLN | 66 | 11.129 | 7.802  | 11.446 | 1.00 | 0.00 |
| ATOM | 1036 | HG3  | GLN | 66 | 11.873 | 6.288  | 12.013 | 1.00 | 0.00 |
| ATOM | 1037 | CD   | GLN | 66 | 10.607 | 6.087  | 10.346 | 1.00 | 0.00 |
| ATOM | 1038 | OE1  | GLN | 66 | 9.328  | 5.957  | 10.089 | 1.00 | 0.00 |
| ATOM | 1039 | NE2  | GLN | 66 | 11.488 | 5.675  | 9.589  | 1.00 | 0.00 |
| ATOM | 1040 | HE21 | GLN | 66 | 11.234 | 5.232  | 8.717  | 1.00 | 0.00 |
| ATOM | 1041 | HE22 | GLN | 66 | 12.459 | 5.783  | 9.844  | 1.00 | 0.00 |
| ATOM | 1042 | C    | GLN | 66 | 8.324  | 8.396  | 11.842 | 1.00 | 0.00 |
| ATOM | 1043 | O    | GLN | 66 | 7.123  | 8.112  | 11.756 | 1.00 | 0.00 |
| ATOM | 1044 | N    | ARG | 67 | 8.985  | 9.145  | 10.964 | 1.00 | 0.00 |
| ATOM | 1045 | H    | ARG | 67 | 9.990  | 9.072  | 10.904 | 1.00 | 0.00 |
| ATOM | 1046 | CA   | ARG | 67 | 8.318  | 10.097 | 10.115 | 1.00 | 0.00 |
| ATOM | 1047 | HA   | ARG | 67 | 7.659  | 10.742 | 10.696 | 1.00 | 0.00 |
| ATOM | 1048 | CB   | ARG | 67 | 9.397  | 10.978 | 9.430  | 1.00 | 0.00 |
| ATOM | 1049 | HB2  | ARG | 67 | 10.002 | 11.386 | 10.239 | 1.00 | 0.00 |
| ATOM | 1050 | HB3  | ARG | 67 | 10.001 | 10.295 | 8.833  | 1.00 | 0.00 |
| ATOM | 1051 | CG   | ARG | 67 | 8.897  | 12.115 | 8.548  | 1.00 | 0.00 |
| ATOM | 1052 | HG2  | ARG | 67 | 9.765  | 12.612 | 8.114  | 1.00 | 0.00 |
| ATOM | 1053 | HG3  | ARG | 67 | 8.291  | 11.683 | 7.752  | 1.00 | 0.00 |
| ATOM | 1054 | CD   | ARG | 67 | 8.065  | 13.132 | 9.325  | 1.00 | 0.00 |
| ATOM | 1055 | HD2  | ARG | 67 | 7.740  | 12.672 | 10.258 | 1.00 | 0.00 |
| ATOM | 1056 | HD3  | ARG | 67 | 8.693  | 13.995 | 9.546  | 1.00 | 0.00 |

|      |      |      |     |    |       |        |        |      |      |
|------|------|------|-----|----|-------|--------|--------|------|------|
| ATOM | 1057 | NE   | ARG | 67 | 6.875 | 13.591 | 8.585  | 1.00 | 0.00 |
| ATOM | 1058 | HE   | ARG | 67 | 6.974 | 13.628 | 7.580  | 1.00 | 0.00 |
| ATOM | 1059 | CZ   | ARG | 67 | 5.702 | 13.960 | 9.127  | 1.00 | 0.00 |
| ATOM | 1060 | NH1  | ARG | 67 | 5.495 | 13.923 | 10.449 | 1.00 | 0.00 |
| ATOM | 1061 | HH11 | ARG | 67 | 6.233 | 13.612 | 11.064 | 1.00 | 0.00 |
| ATOM | 1062 | HH12 | ARG | 67 | 4.601 | 14.207 | 10.825 | 1.00 | 0.00 |
| ATOM | 1063 | NH2  | ARG | 67 | 4.708 | 14.370 | 8.333  | 1.00 | 0.00 |
| ATOM | 1064 | HH21 | ARG | 67 | 4.844 | 14.400 | 7.332  | 1.00 | 0.00 |
| ATOM | 1065 | HH22 | ARG | 67 | 3.825 | 14.648 | 8.737  | 1.00 | 0.00 |
| ATOM | 1066 | C    | ARG | 67 | 7.456 | 9.311  | 9.084  | 1.00 | 0.00 |
| ATOM | 1067 | O    | ARG | 67 | 6.259 | 9.571  | 8.912  | 1.00 | 0.00 |
| ATOM | 1068 | N    | CYX | 68 | 8.111 | 8.345  | 8.477  | 1.00 | 0.00 |
| ATOM | 1069 | H    | CYX | 68 | 9.071 | 8.139  | 8.714  | 1.00 | 0.00 |
| ATOM | 1070 | CA   | CYX | 68 | 7.462 | 7.550  | 7.381  | 1.00 | 0.00 |
| ATOM | 1071 | HA   | CYX | 68 | 7.098 | 8.219  | 6.600  | 1.00 | 0.00 |
| ATOM | 1072 | CB   | CYX | 68 | 8.440 | 6.616  | 6.785  | 1.00 | 0.00 |
| ATOM | 1073 | HB2  | CYX | 68 | 8.854 | 5.977  | 7.564  | 1.00 | 0.00 |
| ATOM | 1074 | HB3  | CYX | 68 | 7.944 | 5.999  | 6.036  | 1.00 | 0.00 |
| ATOM | 1075 | SG   | CYX | 68 | 9.809 | 7.554  | 6.016  | 1.00 | 0.00 |
| ATOM | 1076 | C    | CYX | 68 | 6.286 | 6.808  | 7.939  | 1.00 | 0.00 |
| ATOM | 1077 | O    | CYX | 68 | 5.193 | 6.795  | 7.345  | 1.00 | 0.00 |
| ATOM | 1078 | N    | ARG | 69 | 6.418 | 6.266  | 9.160  | 1.00 | 0.00 |

|      |      |      |     |    |        |       |        |      |      |
|------|------|------|-----|----|--------|-------|--------|------|------|
| ATOM | 1079 | H    | ARG | 69 | 7.272  | 6.273 | 9.699  | 1.00 | 0.00 |
| ATOM | 1080 | CA   | ARG | 69 | 5.243  | 5.535 | 9.708  | 1.00 | 0.00 |
| ATOM | 1081 | HA   | ARG | 69 | 4.873  | 4.832 | 8.961  | 1.00 | 0.00 |
| ATOM | 1082 | CB   | ARG | 69 | 5.618  | 4.748 | 10.985 | 1.00 | 0.00 |
| ATOM | 1083 | HB2  | ARG | 69 | 6.005  | 5.442 | 11.731 | 1.00 | 0.00 |
| ATOM | 1084 | HB3  | ARG | 69 | 4.727  | 4.256 | 11.375 | 1.00 | 0.00 |
| ATOM | 1085 | CG   | ARG | 69 | 6.663  | 3.717 | 10.671 | 1.00 | 0.00 |
| ATOM | 1086 | HG2  | ARG | 69 | 6.341  | 3.176 | 9.781  | 1.00 | 0.00 |
| ATOM | 1087 | HG3  | ARG | 69 | 7.595  | 4.240 | 10.460 | 1.00 | 0.00 |
| ATOM | 1088 | CD   | ARG | 69 | 6.878  | 2.743 | 11.801 | 1.00 | 0.00 |
| ATOM | 1089 | HD2  | ARG | 69 | 5.949  | 2.217 | 12.023 | 1.00 | 0.00 |
| ATOM | 1090 | HD3  | ARG | 69 | 7.648  | 2.021 | 11.531 | 1.00 | 0.00 |
| ATOM | 1091 | NE   | ARG | 69 | 7.310  | 3.463 | 13.004 | 1.00 | 0.00 |
| ATOM | 1092 | HE   | ARG | 69 | 6.568  | 3.791 | 13.606 | 1.00 | 0.00 |
| ATOM | 1093 | CZ   | ARG | 69 | 8.576  | 3.704 | 13.361 | 1.00 | 0.00 |
| ATOM | 1094 | NH1  | ARG | 69 | 9.615  | 3.291 | 12.624 | 1.00 | 0.00 |
| ATOM | 1095 | HH11 | ARG | 69 | 9.451  | 2.780 | 11.768 | 1.00 | 0.00 |
| ATOM | 1096 | HH12 | ARG | 69 | 10.557 | 3.493 | 12.927 | 1.00 | 0.00 |
| ATOM | 1097 | NH2  | ARG | 69 | 8.791  | 4.388 | 14.485 | 1.00 | 0.00 |
| ATOM | 1098 | HH21 | ARG | 69 | 8.007  | 4.706 | 15.036 | 1.00 | 0.00 |
| ATOM | 1099 | HH22 | ARG | 69 | 9.736  | 4.585 | 14.779 | 1.00 | 0.00 |
| ATOM | 1100 | C    | ARG | 69 | 4.126  | 6.429 | 9.978  | 1.00 | 0.00 |

|      |      |     |     |    |       |        |        |      |      |
|------|------|-----|-----|----|-------|--------|--------|------|------|
| ATOM | 1101 | O   | ARG | 69 | 2.972 | 6.115  | 9.749  | 1.00 | 0.00 |
| ATOM | 1102 | N   | HIE | 70 | 4.429 | 7.608  | 10.493 | 1.00 | 0.00 |
| ATOM | 1103 | H   | HIE | 70 | 5.379 | 7.864  | 10.722 | 1.00 | 0.00 |
| ATOM | 1104 | CA  | HIE | 70 | 3.413 | 8.537  | 10.744 | 1.00 | 0.00 |
| ATOM | 1105 | HA  | HIE | 70 | 2.650 | 8.084  | 11.378 | 1.00 | 0.00 |
| ATOM | 1106 | CB  | HIE | 70 | 3.970 | 9.776  | 11.457 | 1.00 | 0.00 |
| ATOM | 1107 | HB2 | HIE | 70 | 4.442 | 9.539  | 12.410 | 1.00 | 0.00 |
| ATOM | 1108 | HB3 | HIE | 70 | 4.696 | 10.255 | 10.801 | 1.00 | 0.00 |
| ATOM | 1109 | CG  | HIE | 70 | 2.912 | 10.800 | 11.746 | 1.00 | 0.00 |
| ATOM | 1110 | ND1 | HIE | 70 | 1.784 | 10.516 | 12.496 | 1.00 | 0.00 |
| ATOM | 1111 | CE1 | HIE | 70 | 1.020 | 11.593 | 12.559 | 1.00 | 0.00 |
| ATOM | 1112 | HE1 | HIE | 70 | 0.081 | 11.576 | 13.112 | 1.00 | 0.00 |
| ATOM | 1113 | NE2 | HIE | 70 | 1.606 | 12.562 | 11.873 | 1.00 | 0.00 |
| ATOM | 1114 | HE2 | HIE | 70 | 1.250 | 13.500 | 11.750 | 1.00 | 0.00 |
| ATOM | 1115 | CD2 | HIE | 70 | 2.785 | 12.091 | 11.348 | 1.00 | 0.00 |
| ATOM | 1116 | HD2 | HIE | 70 | 3.409 | 12.745 | 10.739 | 1.00 | 0.00 |
| ATOM | 1117 | C   | HIE | 70 | 2.731 | 9.004  | 9.445  | 1.00 | 0.00 |
| ATOM | 1118 | O   | HIE | 70 | 1.543 | 9.134  | 9.415  | 1.00 | 0.00 |
| ATOM | 1119 | N   | GLN | 71 | 3.497 | 9.209  | 8.403  | 1.00 | 0.00 |
| ATOM | 1120 | H   | GLN | 71 | 4.498 | 9.078  | 8.421  | 1.00 | 0.00 |
| ATOM | 1121 | CA  | GLN | 71 | 2.879 | 9.664  | 7.157  | 1.00 | 0.00 |
| ATOM | 1122 | HA  | GLN | 71 | 2.267 | 10.552 | 7.318  | 1.00 | 0.00 |

|      |      |      |     |    |       |        |       |      |      |
|------|------|------|-----|----|-------|--------|-------|------|------|
| ATOM | 1123 | CB   | GLN | 71 | 3.984 | 10.010 | 6.214 | 1.00 | 0.00 |
| ATOM | 1124 | HB2  | GLN | 71 | 4.736 | 9.222  | 6.252 | 1.00 | 0.00 |
| ATOM | 1125 | HB3  | GLN | 71 | 3.576 | 10.074 | 5.205 | 1.00 | 0.00 |
| ATOM | 1126 | CG   | GLN | 71 | 4.625 | 11.342 | 6.588 | 1.00 | 0.00 |
| ATOM | 1127 | HG2  | GLN | 71 | 3.827 | 12.083 | 6.651 | 1.00 | 0.00 |
| ATOM | 1128 | HG3  | GLN | 71 | 5.200 | 11.349 | 7.513 | 1.00 | 0.00 |
| ATOM | 1129 | CD   | GLN | 71 | 5.509 | 11.703 | 5.487 | 1.00 | 0.00 |
| ATOM | 1130 | OE1  | GLN | 71 | 5.022 | 11.908 | 4.411 | 1.00 | 0.00 |
| ATOM | 1131 | NE2  | GLN | 71 | 6.781 | 11.691 | 5.694 | 1.00 | 0.00 |
| ATOM | 1132 | HE21 | GLN | 71 | 7.413 | 11.938 | 4.946 | 1.00 | 0.00 |
| ATOM | 1133 | HE22 | GLN | 71 | 7.139 | 11.436 | 6.603 | 1.00 | 0.00 |
| ATOM | 1134 | C    | GLN | 71 | 1.970 | 8.583  | 6.525 | 1.00 | 0.00 |
| ATOM | 1135 | O    | GLN | 71 | 0.898 | 8.884  | 6.023 | 1.00 | 0.00 |
| ATOM | 1136 | N    | PHE | 72 | 2.386 | 7.339  | 6.644 | 1.00 | 0.00 |
| ATOM | 1137 | H    | PHE | 72 | 3.303 | 7.149  | 7.021 | 1.00 | 0.00 |
| ATOM | 1138 | CA   | PHE | 72 | 1.572 | 6.212  | 6.205 | 1.00 | 0.00 |
| ATOM | 1139 | HA   | PHE | 72 | 1.359 | 6.284  | 5.138 | 1.00 | 0.00 |
| ATOM | 1140 | CB   | PHE | 72 | 2.352 | 4.902  | 6.466 | 1.00 | 0.00 |
| ATOM | 1141 | HB2  | PHE | 72 | 3.239 | 4.808  | 5.840 | 1.00 | 0.00 |
| ATOM | 1142 | HB3  | PHE | 72 | 2.644 | 4.883  | 7.516 | 1.00 | 0.00 |
| ATOM | 1143 | CG   | PHE | 72 | 1.531 | 3.680  | 6.229 | 1.00 | 0.00 |
| ATOM | 1144 | CD1  | PHE | 72 | 1.269 | 3.254  | 4.909 | 1.00 | 0.00 |

|      |      |         |    |        |       |        |      |      |
|------|------|---------|----|--------|-------|--------|------|------|
| ATOM | 1145 | HD1 PHE | 72 | 1.684  | 3.808 | 4.067  | 1.00 | 0.00 |
| ATOM | 1146 | CE1 PHE | 72 | 0.486  | 2.136 | 4.683  | 1.00 | 0.00 |
| ATOM | 1147 | HE1 PHE | 72 | 0.248  | 1.860 | 3.655  | 1.00 | 0.00 |
| ATOM | 1148 | CZ PHE  | 72 | 0.007  | 1.374 | 5.731  | 1.00 | 0.00 |
| ATOM | 1149 | HZ PHE  | 72 | -0.568 | 0.467 | 5.546  | 1.00 | 0.00 |
| ATOM | 1150 | CE2 PHE | 72 | 0.273  | 1.788 | 7.065  | 1.00 | 0.00 |
| ATOM | 1151 | HE2 PHE | 72 | -0.138 | 1.230 | 7.906  | 1.00 | 0.00 |
| ATOM | 1152 | CD2 PHE | 72 | 1.058  | 2.906 | 7.293  | 1.00 | 0.00 |
| ATOM | 1153 | HD2 PHE | 72 | 1.315  | 3.193 | 8.312  | 1.00 | 0.00 |
| ATOM | 1154 | C PHE   | 72 | 0.218  | 6.161 | 6.912  | 1.00 | 0.00 |
| ATOM | 1155 | O PHE   | 72 | -0.823 | 6.148 | 6.312  | 1.00 | 0.00 |
| ATOM | 1156 | N GLN   | 73 | 0.259  | 6.304 | 8.256  | 1.00 | 0.00 |
| ATOM | 1157 | H GLN   | 73 | 1.071  | 5.804 | 8.587  | 1.00 | 0.00 |
| ATOM | 1158 | CA GLN  | 73 | -0.943 | 6.278 | 9.066  | 1.00 | 0.00 |
| ATOM | 1159 | HA GLN  | 73 | -0.475 | 6.489 | 10.027 | 1.00 | 0.00 |
| ATOM | 1160 | CB GLN  | 73 | 0.148  | 6.179 | 8.004  | 1.00 | 0.00 |
| ATOM | 1161 | HB2 GLN | 73 | 0.832  | 5.370 | 8.260  | 1.00 | 0.00 |
| ATOM | 1162 | HB3 GLN | 73 | -0.306 | 5.977 | 7.034  | 1.00 | 0.00 |
| ATOM | 1163 | CG GLN  | 73 | 0.917  | 7.494 | 7.941  | 1.00 | 0.00 |
| ATOM | 1164 | HG2 GLN | 73 | 0.234  | 8.303 | 7.685  | 1.00 | 0.00 |
| ATOM | 1165 | HG3 GLN | 73 | 1.372  | 7.696 | 8.911  | 1.00 | 0.00 |
| ATOM | 1166 | CD GLN  | 73 | 2.017  | 7.435 | 6.891  | 1.00 | 0.00 |

|      |      |      |     |    |        |        |       |      |      |
|------|------|------|-----|----|--------|--------|-------|------|------|
| ATOM | 1167 | OE1  | GLN | 73 | 2.191  | 6.417  | 6.226 | 1.00 | 0.00 |
| ATOM | 1168 | NE2  | GLN | 73 | 2.762  | 8.534  | 6.744 | 1.00 | 0.00 |
| ATOM | 1169 | HE21 | GLN | 73 | 3.506  | 8.548  | 6.060 | 1.00 | 0.00 |
| ATOM | 1170 | HE22 | GLN | 73 | 2.578  | 9.345  | 7.316 | 1.00 | 0.00 |
| ATOM | 1171 | C    | GLN | 73 | -1.856 | 7.461  | 8.693 | 1.00 | 0.00 |
| ATOM | 1172 | O    | GLN | 73 | -3.078 | 7.338  | 8.501 | 1.00 | 0.00 |
| ATOM | 1173 | N    | THR | 74 | -1.236 | 8.635  | 8.534 | 1.00 | 0.00 |
| ATOM | 1174 | H    | THR | 74 | -0.241 | 8.708  | 8.687 | 1.00 | 0.00 |
| ATOM | 1175 | CA   | THR | 74 | -1.961 | 9.826  | 8.201 | 1.00 | 0.00 |
| ATOM | 1176 | HA   | THR | 74 | -2.829 | 9.978  | 8.842 | 1.00 | 0.00 |
| ATOM | 1177 | CB   | THR | 74 | -1.052 | 11.062 | 8.303 | 1.00 | 0.00 |
| ATOM | 1178 | HB   | THR | 74 | -0.202 | 10.938 | 7.633 | 1.00 | 0.00 |
| ATOM | 1179 | CG2  | THR | 74 | -1.823 | 12.310 | 7.914 | 1.00 | 0.00 |
| ATOM | 1180 | HG21 | THR | 74 | -2.674 | 12.436 | 8.584 | 1.00 | 0.00 |
| ATOM | 1181 | HG22 | THR | 74 | -1.170 | 13.180 | 7.989 | 1.00 | 0.00 |
| ATOM | 1182 | HG23 | THR | 74 | -2.180 | 12.213 | 6.888 | 1.00 | 0.00 |
| ATOM | 1183 | OG1  | THR | 74 | -0.523 | 11.150 | 9.627 | 1.00 | 0.00 |
| ATOM | 1184 | HG1  | THR | 74 | 0.045  | 11.921 | 9.694 | 1.00 | 0.00 |
| ATOM | 1185 | C    | THR | 74 | -2.594 | 9.819  | 6.818 | 1.00 | 0.00 |
| ATOM | 1186 | O    | THR | 74 | -3.742 | 10.308 | 6.626 | 1.00 | 0.00 |
| ATOM | 1187 | N    | GLN | 75 | -1.911 | 9.174  | 5.851 | 1.00 | 0.00 |
| ATOM | 1188 | H    | GLN | 75 | -0.958 | 8.866  | 5.976 | 1.00 | 0.00 |

|      |      |      |     |    |        |        |       |      |      |
|------|------|------|-----|----|--------|--------|-------|------|------|
| ATOM | 1189 | CA   | GLN | 75 | -2.514 | 9.059  | 4.505 | 1.00 | 0.00 |
| ATOM | 1190 | HA   | GLN | 75 | -3.273 | 9.829  | 4.364 | 1.00 | 0.00 |
| ATOM | 1191 | CB   | GLN | 75 | -1.430 | 9.240  | 3.441 | 1.00 | 0.00 |
| ATOM | 1192 | HB2  | GLN | 75 | -0.710 | 8.435  | 3.583 | 1.00 | 0.00 |
| ATOM | 1193 | HB3  | GLN | 75 | -1.916 | 9.126  | 2.472 | 1.00 | 0.00 |
| ATOM | 1194 | CG   | GLN | 75 | -0.719 | 10.562 | 3.492 | 1.00 | 0.00 |
| ATOM | 1195 | HG2  | GLN | 75 | -0.145 | 10.596 | 4.418 | 1.00 | 0.00 |
| ATOM | 1196 | HG3  | GLN | 75 | -0.042 | 10.642 | 2.641 | 1.00 | 0.00 |
| ATOM | 1197 | CD   | GLN | 75 | -1.679 | 11.757 | 3.467 | 1.00 | 0.00 |
| ATOM | 1198 | OE1  | GLN | 75 | -2.701 | 11.729 | 2.793 | 1.00 | 0.00 |
| ATOM | 1199 | NE2  | GLN | 75 | -1.333 | 12.770 | 4.169 | 1.00 | 0.00 |
| ATOM | 1200 | HE21 | GLN | 75 | -1.924 | 13.589 | 4.194 | 1.00 | 0.00 |
| ATOM | 1201 | HE22 | GLN | 75 | -0.471 | 12.746 | 4.695 | 1.00 | 0.00 |
| ATOM | 1202 | C    | GLN | 75 | -3.338 | 7.766  | 4.328 | 1.00 | 0.00 |
| ATOM | 1203 | O    | GLN | 75 | -3.298 | 7.030  | 3.302 | 1.00 | 0.00 |
| ATOM | 1204 | N    | GLN | 76 | -4.171 | 7.492  | 5.323 | 1.00 | 0.00 |
| ATOM | 1205 | H    | GLN | 76 | -4.031 | 7.929  | 6.223 | 1.00 | 0.00 |
| ATOM | 1206 | CA   | GLN | 76 | -5.203 | 6.484  | 5.202 | 1.00 | 0.00 |
| ATOM | 1207 | HA   | GLN | 76 | -5.737 | 6.409  | 6.149 | 1.00 | 0.00 |
| ATOM | 1208 | CB   | GLN | 76 | -6.216 | 6.819  | 4.092 | 1.00 | 0.00 |
| ATOM | 1209 | HB2  | GLN | 76 | -5.881 | 6.239  | 3.232 | 1.00 | 0.00 |
| ATOM | 1210 | HB3  | GLN | 76 | -7.162 | 6.417  | 4.455 | 1.00 | 0.00 |



|      |      |      |     |    |        |        |       |      |      |
|------|------|------|-----|----|--------|--------|-------|------|------|
| ATOM | 1211 | CG   | GLN | 76 | -6.410 | 8.289  | 3.674 | 1.00 | 0.00 |
| ATOM | 1212 | HG2  | GLN | 76 | -5.475 | 8.653  | 3.249 | 1.00 | 0.00 |
| ATOM | 1213 | HG3  | GLN | 76 | -7.188 | 8.311  | 2.910 | 1.00 | 0.00 |
| ATOM | 1214 | CD   | GLN | 76 | -6.817 | 9.207  | 4.804 | 1.00 | 0.00 |
| ATOM | 1215 | OE1  | GLN | 76 | -6.198 | 10.251 | 5.034 | 1.00 | 0.00 |
| ATOM | 1216 | NE2  | GLN | 76 | -7.875 | 8.830  | 5.512 | 1.00 | 0.00 |
| ATOM | 1217 | HE21 | GLN | 76 | -8.195 | 9.403  | 6.280 | 1.00 | 0.00 |
| ATOM | 1218 | HE22 | GLN | 76 | -8.355 | 7.973  | 5.279 | 1.00 | 0.00 |
| ATOM | 1219 | C    | GLN | 76 | -4.560 | 5.115  | 5.021 | 1.00 | 0.00 |
| ATOM | 1220 | O    | GLN | 76 | -5.147 | 4.229  | 4.396 | 1.00 | 0.00 |
| ATOM | 1221 | N    | ARG | 77 | -3.364 | 4.912  | 5.563 | 1.00 | 0.00 |
| ATOM | 1222 | H    | ARG | 77 | -4.121 | 4.985  | 6.228 | 1.00 | 0.00 |
| ATOM | 1223 | CA   | ARG | 77 | -2.675 | 3.643  | 5.443 | 1.00 | 0.00 |
| ATOM | 1224 | HA   | ARG | 77 | -3.602 | 4.211  | 5.528 | 1.00 | 0.00 |
| ATOM | 1225 | CB   | ARG | 77 | -1.514 | 4.542  | 5.856 | 1.00 | 0.00 |
| ATOM | 1226 | HB2  | ARG | 77 | -1.651 | 4.863  | 6.889 | 1.00 | 0.00 |
| ATOM | 1227 | HB3  | ARG | 77 | -0.578 | 3.991  | 5.768 | 1.00 | 0.00 |
| ATOM | 1228 | CG   | ARG | 77 | -1.471 | 5.766  | 4.946 | 1.00 | 0.00 |
| ATOM | 1229 | HG2  | ARG | 77 | -1.333 | 5.446  | 3.913 | 1.00 | 0.00 |
| ATOM | 1230 | HG3  | ARG | 77 | -2.406 | 6.318  | 5.034 | 1.00 | 0.00 |
| ATOM | 1231 | CD   | ARG | 77 | -0.310 | 6.665  | 5.359 | 1.00 | 0.00 |
| ATOM | 1232 | HD2  | ARG | 77 | -0.447 | 6.985  | 6.392 | 1.00 | 0.00 |

|      |      |      |     |    |        |        |       |      |      |
|------|------|------|-----|----|--------|--------|-------|------|------|
| ATOM | 1233 | HD3  | ARG | 77 | 0.626  | 6.113  | 5.271 | 1.00 | 0.00 |
| ATOM | 1234 | NE   | ARG | 77 | -0.236 | 7.865  | 4.496 | 1.00 | 0.00 |
| ATOM | 1235 | HE   | ARG | 77 | -0.919 | 7.972  | 3.759 | 1.00 | 0.00 |
| ATOM | 1236 | CZ   | ARG | 77 | 0.688  | 8.810  | 4.647 | 1.00 | 0.00 |
| ATOM | 1237 | NH1  | ARG | 77 | 1.620  | 8.740  | 5.593 | 1.00 | 0.00 |
| ATOM | 1238 | HH11 | ARG | 77 | 1.637  | 7.950  | 6.223 | 1.00 | 0.00 |
| ATOM | 1239 | HH12 | ARG | 77 | 2.306  | 9.476  | 5.678 | 1.00 | 0.00 |
| ATOM | 1240 | NH2  | ARG | 77 | 0.662  | 9.847  | 3.815 | 1.00 | 0.00 |
| ATOM | 1241 | HH21 | ARG | 77 | -0.047 | 9.897  | 3.097 | 1.00 | 0.00 |
| ATOM | 1242 | HH22 | ARG | 77 | 1.351  | 10.580 | 3.905 | 1.00 | 0.00 |
| ATOM | 1243 | C    | ARG | 77 | -2.471 | 3.261  | 3.991 | 1.00 | 0.00 |
| ATOM | 1244 | O    | ARG | 77 | -2.389 | 2.088  | 3.649 | 1.00 | 0.00 |
| ATOM | 1245 | N    | LEU | 78 | -2.406 | 4.278  | 3.135 | 1.00 | 0.00 |
| ATOM | 1246 | H    | LEU | 78 | -2.451 | 5.234  | 3.458 | 1.00 | 0.00 |
| ATOM | 1247 | CA   | LEU | 78 | -2.406 | 4.021  | 1.625 | 1.00 | 0.00 |
| ATOM | 1248 | HA   | LEU | 78 | -2.736 | 4.918  | 1.100 | 1.00 | 0.00 |
| ATOM | 1249 | CB   | LEU | 78 | -1.013 | 3.661  | 1.142 | 1.00 | 0.00 |
| ATOM | 1250 | HB2  | LEU | 78 | -0.850 | 2.717  | 1.661 | 1.00 | 0.00 |
| ATOM | 1251 | HB3  | LEU | 78 | -1.057 | 3.481  | 0.068 | 1.00 | 0.00 |
| ATOM | 1252 | CG   | LEU | 78 | 0.134  | 4.615  | 1.450 | 1.00 | 0.00 |
| ATOM | 1253 | HG   | LEU | 78 | 0.243  | 4.700  | 2.531 | 1.00 | 0.00 |
| ATOM | 1254 | CD1  | LEU | 78 | 1.422  | 4.104  | 0.853 | 1.00 | 0.00 |

|      |      |      |     |    |        |       |        |      |      |
|------|------|------|-----|----|--------|-------|--------|------|------|
| ATOM | 1255 | HD11 | LEU | 78 | 1.313  | 4.019 | -0.228 | 1.00 | 0.00 |
| ATOM | 1256 | HD12 | LEU | 78 | 2.230  | 4.798 | 1.083  | 1.00 | 0.00 |
| ATOM | 1257 | HD13 | LEU | 78 | 1.654  | 3.125 | 1.272  | 1.00 | 0.00 |
| ATOM | 1258 | CD2  | LEU | 78 | -0.232 | 6.048 | 0.961  | 1.00 | 0.00 |
| ATOM | 1259 | HD21 | LEU | 78 | -1.133 | 6.388 | 1.472  | 1.00 | 0.00 |
| ATOM | 1260 | HD22 | LEU | 78 | 0.590  | 6.729 | 1.182  | 1.00 | 0.00 |
| ATOM | 1261 | HD23 | LEU | 78 | -0.410 | 6.032 | -0.115 | 1.00 | 0.00 |
| ATOM | 1262 | C    | LEU | 78 | -3.442 | 2.986 | 1.250  | 1.00 | 0.00 |
| ATOM | 1263 | O    | LEU | 78 | -3.226 | 2.070 | 0.396  | 1.00 | 0.00 |
| ATOM | 1264 | N    | ARG | 79 | -4.645 | 3.114 | 1.843  | 1.00 | 0.00 |
| ATOM | 1265 | H    | ARG | 79 | -4.838 | 3.886 | 2.466  | 1.00 | 0.00 |
| ATOM | 1266 | CA   | ARG | 79 | -5.687 | 2.116 | 1.636  | 1.00 | 0.00 |
| ATOM | 1267 | HA   | ARG | 79 | -5.358 | 1.144 | 2.003  | 1.00 | 0.00 |
| ATOM | 1268 | CB   | ARG | 79 | -6.942 | 2.524 | 2.398  | 1.00 | 0.00 |
| ATOM | 1269 | HB2  | ARG | 79 | -6.614 | 2.934 | 3.353  | 1.00 | 0.00 |
| ATOM | 1270 | HB3  | ARG | 79 | -7.427 | 3.307 | 1.814  | 1.00 | 0.00 |
| ATOM | 1271 | CG   | ARG | 79 | -7.917 | 1.405 | 2.642  | 1.00 | 0.00 |
| ATOM | 1272 | HG2  | ARG | 79 | -8.356 | 1.088 | 1.696  | 1.00 | 0.00 |
| ATOM | 1273 | HG3  | ARG | 79 | -7.402 | 0.563 | 3.103  | 1.00 | 0.00 |
| ATOM | 1274 | CD   | ARG | 79 | -9.031 | 1.903 | 3.584  | 1.00 | 0.00 |
| ATOM | 1275 | HD2  | ARG | 79 | -9.743 | 2.510 | 3.024  | 1.00 | 0.00 |
| ATOM | 1276 | HD3  | ARG | 79 | -9.549 | 1.051 | 4.024  | 1.00 | 0.00 |

|      |      |      |     |    |         |       |        |      |      |
|------|------|------|-----|----|---------|-------|--------|------|------|
| ATOM | 1277 | NE   | ARG | 79 | -8.460  | 2.726 | 4.674  | 1.00 | 0.00 |
| ATOM | 1278 | HE   | ARG | 79 | -7.604  | 2.366 | 5.071  | 1.00 | 0.00 |
| ATOM | 1279 | CZ   | ARG | 79 | -8.962  | 3.871 | 5.165  | 1.00 | 0.00 |
| ATOM | 1280 | NH1  | ARG | 79 | -10.102 | 4.397 | 4.702  | 1.00 | 0.00 |
| ATOM | 1281 | HH11 | ARG | 79 | -10.608 | 3.929 | 3.963  | 1.00 | 0.00 |
| ATOM | 1282 | HH12 | ARG | 79 | -10.452 | 5.260 | 5.093  | 1.00 | 0.00 |
| ATOM | 1283 | NH2  | ARG | 79 | -8.310  | 4.508 | 6.144  | 1.00 | 0.00 |
| ATOM | 1284 | HH21 | ARG | 79 | -7.449  | 4.125 | 6.505  | 1.00 | 0.00 |
| ATOM | 1285 | HH22 | ARG | 79 | -8.683  | 5.370 | 6.517  | 1.00 | 0.00 |
| ATOM | 1286 | C    | ARG | 79 | -6.049  | 1.901 | 0.166  | 1.00 | 0.00 |
| ATOM | 1287 | O    | ARG | 79 | -6.205  | 0.817 | -0.269 | 1.00 | 0.00 |
| ATOM | 1288 | N    | ALA | 80 | -6.027  | 2.945 | -0.650 | 1.00 | 0.00 |
| ATOM | 1289 | H    | ALA | 80 | -5.890  | 3.897 | -0.343 | 1.00 | 0.00 |
| ATOM | 1290 | CA   | ALA | 80 | -6.270  | 2.706 | -2.061 | 1.00 | 0.00 |
| ATOM | 1291 | HA   | ALA | 80 | -7.159  | 2.079 | -2.137 | 1.00 | 0.00 |
| ATOM | 1292 | CB   | ALA | 80 | -6.536  | 4.019 | -2.792 | 1.00 | 0.00 |
| ATOM | 1293 | HB1  | ALA | 80 | -5.652  | 4.654 | -2.733 | 1.00 | 0.00 |
| ATOM | 1294 | HB2  | ALA | 80 | -6.766  | 3.814 | -3.838 | 1.00 | 0.00 |
| ATOM | 1295 | HB3  | ALA | 80 | -7.381  | 4.529 | -2.329 | 1.00 | 0.00 |
| ATOM | 1296 | C    | ALA | 80 | -5.132  | 1.989 | -2.740 | 1.00 | 0.00 |
| ATOM | 1297 | O    | ALA | 80 | -5.409  | 1.166 | -3.649 | 1.00 | 0.00 |
| ATOM | 1298 | N    | CYX | 81 | -3.887  | 2.194 | -2.343 | 1.00 | 0.00 |

|      |      |     |     |    |        |        |        |      |      |
|------|------|-----|-----|----|--------|--------|--------|------|------|
| ATOM | 1299 | H   | CYX | 81 | -3.695 | 2.872  | -1.619 | 1.00 | 0.00 |
| ATOM | 1300 | CA  | CYX | 81 | -2.773 | 1.469  | -2.918 | 1.00 | 0.00 |
| ATOM | 1301 | HA  | CYX | 81 | -2.845 | 1.557  | -4.002 | 1.00 | 0.00 |
| ATOM | 1302 | CB  | CYX | 81 | -1.438 | 1.948  | -2.492 | 1.00 | 0.00 |
| ATOM | 1303 | HB2 | CYX | 81 | -1.330 | 1.814  | -1.416 | 1.00 | 0.00 |
| ATOM | 1304 | HB3 | CYX | 81 | -0.666 | 1.379  | -3.009 | 1.00 | 0.00 |
| ATOM | 1305 | SG  | CYX | 81 | -1.294 | 3.777  | -2.910 | 1.00 | 0.00 |
| ATOM | 1306 | C   | CYX | 81 | -2.865 | -0.010 | -2.513 | 1.00 | 0.00 |
| ATOM | 1307 | O   | CYX | 81 | -2.563 | -0.894 | -3.239 | 1.00 | 0.00 |
| ATOM | 1308 | N   | GLN | 82 | -3.353 | -0.209 | -1.268 | 1.00 | 0.00 |
| ATOM | 1309 | H   | GLN | 82 | -3.570 | 0.533  | -0.618 | 1.00 | 0.00 |
| ATOM | 1310 | CA  | GLN | 82 | -3.540 | -1.596 | -0.829 | 1.00 | 0.00 |
| ATOM | 1311 | HA  | GLN | 82 | -2.587 | -2.121 | -0.890 | 1.00 | 0.00 |
| ATOM | 1312 | CB  | GLN | 82 | -4.050 | -1.673 | 0.614  | 1.00 | 0.00 |
| ATOM | 1313 | HB2 | GLN | 82 | -4.970 | -1.089 | 0.644  | 1.00 | 0.00 |
| ATOM | 1314 | HB3 | GLN | 82 | -4.280 | -2.722 | 0.801  | 1.00 | 0.00 |
| ATOM | 1315 | CG  | GLN | 82 | -3.108 | -1.174 | 1.663  | 1.00 | 0.00 |
| ATOM | 1316 | HG2 | GLN | 82 | -2.188 | -1.757 | 1.648  | 1.00 | 0.00 |
| ATOM | 1317 | HG3 | GLN | 82 | -2.872 | -0.119 | 1.518  | 1.00 | 0.00 |
| ATOM | 1318 | CD  | GLN | 82 | -3.769 | -1.342 | 3.025  | 1.00 | 0.00 |
| ATOM | 1319 | OE1 | GLN | 82 | -4.381 | -2.369 | 3.273  | 1.00 | 0.00 |
| ATOM | 1320 | NE2 | GLN | 82 | -3.662 | -0.344 | 3.887  | 1.00 | 0.00 |

|      |      |      |     |    |         |        |        |      |      |
|------|------|------|-----|----|---------|--------|--------|------|------|
| ATOM | 1321 | HE21 | GLN | 82 | -4.088  | -0.421 | 4.799  | 1.00 | 0.00 |
| ATOM | 1322 | HE22 | GLN | 82 | -3.155  | 0.491  | 3.628  | 1.00 | 0.00 |
| ATOM | 1323 | C    | GLN | 82 | -4.510  | -2.287 | -1.742 | 1.00 | 0.00 |
| ATOM | 1324 | O    | GLN | 82 | -4.214  | -3.426 | -2.112 | 1.00 | 0.00 |
| ATOM | 1325 | N    | ARG | 83 | -5.579  | -1.627 | -2.149 | 1.00 | 0.00 |
| ATOM | 1326 | H    | ARG | 83 | -5.754  | -0.744 | -1.690 | 1.00 | 0.00 |
| ATOM | 1327 | CA   | ARG | 83 | -6.559  | -2.116 | -3.082 | 1.00 | 0.00 |
| ATOM | 1328 | HA   | ARG | 83 | -6.898  | -3.099 | -2.757 | 1.00 | 0.00 |
| ATOM | 1329 | CB   | ARG | 83 | -7.750  | -1.208 | -3.182 | 1.00 | 0.00 |
| ATOM | 1330 | HB2  | ARG | 83 | -7.312  | -0.230 | -3.385 | 1.00 | 0.00 |
| ATOM | 1331 | HB3  | ARG | 83 | -8.271  | -1.563 | -4.072 | 1.00 | 0.00 |
| ATOM | 1332 | CG   | ARG | 83 | -8.739  | -1.092 | -2.027 | 1.00 | 0.00 |
| ATOM | 1333 | HG2  | ARG | 83 | -9.081  | -2.092 | -1.761 | 1.00 | 0.00 |
| ATOM | 1334 | HG3  | ARG | 83 | -8.227  | -0.644 | -1.175 | 1.00 | 0.00 |
| ATOM | 1335 | CD   | ARG | 83 | -9.951  | -0.221 | -2.413 | 1.00 | 0.00 |
| ATOM | 1336 | HD2  | ARG | 83 | -9.694  | 0.399  | -3.272 | 1.00 | 0.00 |
| ATOM | 1337 | HD3  | ARG | 83 | -10.794 | -0.863 | -2.669 | 1.00 | 0.00 |
| ATOM | 1338 | NE   | ARG | 83 | -10.348 | 0.658  | -1.298 | 1.00 | 0.00 |
| ATOM | 1339 | HE   | ARG | 83 | -10.155 | 1.643  | -1.415 | 1.00 | 0.00 |
| ATOM | 1340 | CZ   | ARG | 83 | -10.947 | 0.254  | -0.170 | 1.00 | 0.00 |
| ATOM | 1341 | NH1  | ARG | 83 | -11.244 | -1.031 | 0.035  | 1.00 | 0.00 |
| ATOM | 1342 | HH11 | ARG | 83 | -11.016 | -1.717 | -0.670 | 1.00 | 0.00 |

|      |      |      |     |    |         |        |        |      |      |
|------|------|------|-----|----|---------|--------|--------|------|------|
| ATOM | 1343 | HH12 | ARG | 83 | -11.696 | -1.311 | 0.894  | 1.00 | 0.00 |
| ATOM | 1344 | NH2  | ARG | 83 | -11.245 | 1.144  | 0.781  | 1.00 | 0.00 |
| ATOM | 1345 | HH21 | ARG | 83 | -11.018 | 2.119  | 0.645  | 1.00 | 0.00 |
| ATOM | 1346 | HH22 | ARG | 83 | -11.697 | 0.838  | 1.631  | 1.00 | 0.00 |
| ATOM | 1347 | C    | ARG | 83 | -5.947  | -2.404 | -4.486 | 1.00 | 0.00 |
| ATOM | 1348 | O    | ARG | 83 | -6.138  | -3.477 | -5.063 | 1.00 | 0.00 |
| ATOM | 1349 | N    | VAL | 84 | -5.110  | -1.479 | -4.941 | 1.00 | 0.00 |
| ATOM | 1350 | H    | VAL | 84 | -5.074  | -0.565 | -4.512 | 1.00 | 0.00 |
| ATOM | 1351 | CA   | VAL | 84 | -4.363  | -1.694 | -6.167 | 1.00 | 0.00 |
| ATOM | 1352 | HA   | VAL | 84 | -5.038  | -1.961 | -6.981 | 1.00 | 0.00 |
| ATOM | 1353 | CB   | VAL | 84 | -3.565  | -0.447 | -6.580 | 1.00 | 0.00 |
| ATOM | 1354 | HB   | VAL | 84 | -2.959  | -0.147 | -5.726 | 1.00 | 0.00 |
| ATOM | 1355 | CG1  | VAL | 84 | -2.653  | -0.682 | -7.800 | 1.00 | 0.00 |
| ATOM | 1356 | HG11 | VAL | 84 | -3.259  | -0.981 | -8.655 | 1.00 | 0.00 |
| ATOM | 1357 | HG12 | VAL | 84 | -2.119  | 0.238  | -8.038 | 1.00 | 0.00 |
| ATOM | 1358 | HG13 | VAL | 84 | -1.935  | -1.469 | -7.571 | 1.00 | 0.00 |
| ATOM | 1359 | CG2  | VAL | 84 | -4.580  | 0.648  | -6.885 | 1.00 | 0.00 |
| ATOM | 1360 | HG21 | VAL | 84 | -5.177  | 0.849  | -5.995 | 1.00 | 0.00 |
| ATOM | 1361 | HG22 | VAL | 84 | -4.057  | 1.557  | -7.184 | 1.00 | 0.00 |
| ATOM | 1362 | HG23 | VAL | 84 | -5.234  | 0.323  | -7.695 | 1.00 | 0.00 |
| ATOM | 1363 | C    | VAL | 84 | -3.523  | -2.931 | -6.102 | 1.00 | 0.00 |
| ATOM | 1364 | O    | VAL | 84 | -3.403  | -3.742 | -7.050 | 1.00 | 0.00 |

|      |      |      |     |    |        |        |        |      |      |
|------|------|------|-----|----|--------|--------|--------|------|------|
| ATOM | 1365 | N    | ILE | 85 | -2.738 | -3.059 | -5.034 | 1.00 | 0.00 |
| ATOM | 1366 | H    | ILE | 85 | -2.823 | -2.404 | -4.269 | 1.00 | 0.00 |
| ATOM | 1367 | CA   | ILE | 85 | -1.785 | -4.134 | -4.912 | 1.00 | 0.00 |
| ATOM | 1368 | HA   | ILE | 85 | -1.078 | -4.167 | -5.741 | 1.00 | 0.00 |
| ATOM | 1369 | CB   | ILE | 85 | -1.014 | -3.970 | -3.585 | 1.00 | 0.00 |
| ATOM | 1370 | HB   | ILE | 85 | -1.719 | -3.657 | -2.815 | 1.00 | 0.00 |
| ATOM | 1371 | CG2  | ILE | 85 | -0.344 | -5.261 | -3.162 | 1.00 | 0.00 |
| ATOM | 1372 | HG21 | ILE | 85 | 0.361  | -5.574 | -3.932 | 1.00 | 0.00 |
| ATOM | 1373 | HG22 | ILE | 85 | 0.188  | -5.104 | -2.224 | 1.00 | 0.00 |
| ATOM | 1374 | HG23 | ILE | 85 | -1.099 | -6.035 | -3.026 | 1.00 | 0.00 |
| ATOM | 1375 | CG1  | ILE | 85 | -0.015 | -2.876 | -3.684 | 1.00 | 0.00 |
| ATOM | 1376 | HG12 | ILE | 85 | 0.889  | -3.292 | -4.128 | 1.00 | 0.00 |
| ATOM | 1377 | HG13 | ILE | 85 | -0.425 | -2.111 | -4.344 | 1.00 | 0.00 |
| ATOM | 1378 | CD1  | ILE | 85 | 0.316  | -2.264 | -2.356 | 1.00 | 0.00 |
| ATOM | 1379 | HD11 | ILE | 85 | 0.726  | -3.028 | -1.696 | 1.00 | 0.00 |
| ATOM | 1380 | HD12 | ILE | 85 | 1.051  | -1.471 | -2.494 | 1.00 | 0.00 |
| ATOM | 1381 | HD13 | ILE | 85 | -0.588 | -1.847 | -1.912 | 1.00 | 0.00 |
| ATOM | 1382 | C    | ILE | 85 | -2.639 | -5.450 | -4.883 | 1.00 | 0.00 |
| ATOM | 1383 | O    | ILE | 85 | -2.226 | -6.400 | -5.534 | 1.00 | 0.00 |
| ATOM | 1384 | N    | GLN | 86 | -3.740 | -5.485 | -4.187 | 1.00 | 0.00 |
| ATOM | 1385 | H    | GLN | 86 | -4.014 | -4.698 | -3.616 | 1.00 | 0.00 |
| ATOM | 1386 | CA   | GLN | 86 | -4.598 | -6.720 | -4.158 | 1.00 | 0.00 |



|      |      |      |     |    |        |        |        |      |      |
|------|------|------|-----|----|--------|--------|--------|------|------|
| ATOM | 1387 | HA   | GLN | 86 | -4.000 | -7.592 | -3.895 | 1.00 | 0.00 |
| ATOM | 1388 | CB   | GLN | 86 | -5.670 | -6.552 | -3.135 | 1.00 | 0.00 |
| ATOM | 1389 | HB2  | GLN | 86 | -6.147 | -5.583 | -3.288 | 1.00 | 0.00 |
| ATOM | 1390 | HB3  | GLN | 86 | -6.407 | -7.344 | -3.271 | 1.00 | 0.00 |
| ATOM | 1391 | CG   | GLN | 86 | -5.098 | -6.623 | -1.709 | 1.00 | 0.00 |
| ATOM | 1392 | HG2  | GLN | 86 | -4.368 | -7.413 | -1.537 | 1.00 | 0.00 |
| ATOM | 1393 | HG3  | GLN | 86 | -4.632 | -5.653 | -1.536 | 1.00 | 0.00 |
| ATOM | 1394 | CD   | GLN | 86 | -6.244 | -6.795 | -0.720 | 1.00 | 0.00 |
| ATOM | 1395 | OE1  | GLN | 86 | -6.788 | -5.815 | -0.150 | 1.00 | 0.00 |
| ATOM | 1396 | NE2  | GLN | 86 | -6.704 | -8.031 | -0.604 | 1.00 | 0.00 |
| ATOM | 1397 | HE21 | GLN | 86 | -7.464 | -8.226 | 0.032  | 1.00 | 0.00 |
| ATOM | 1398 | HE22 | GLN | 86 | -6.293 | -8.773 | -1.152 | 1.00 | 0.00 |
| ATOM | 1399 | C    | GLN | 86 | -5.193 | -7.006 | -5.553 | 1.00 | 0.00 |
| ATOM | 1400 | O    | GLN | 86 | -5.178 | -8.123 | -6.000 | 1.00 | 0.00 |
| ATOM | 1401 | N    | ARG | 87 | -5.636 | -5.951 | -6.216 | 1.00 | 0.00 |
| ATOM | 1402 | H    | ARG | 87 | -5.555 | -5.035 | -5.797 | 1.00 | 0.00 |
| ATOM | 1403 | CA   | ARG | 87 | -6.259 | -6.058 | -7.594 | 1.00 | 0.00 |
| ATOM | 1404 | HA   | ARG | 87 | -7.225 | -6.562 | -7.555 | 1.00 | 0.00 |
| ATOM | 1405 | CB   | ARG | 87 | -6.470 | -4.648 | -8.105 | 1.00 | 0.00 |
| ATOM | 1406 | HB2  | ARG | 87 | -7.300 | -4.202 | -7.557 | 1.00 | 0.00 |
| ATOM | 1407 | HB3  | ARG | 87 | -5.563 | -4.073 | -7.920 | 1.00 | 0.00 |
| ATOM | 1408 | CG   | ARG | 87 | -6.784 | -4.636 | -9.602 | 1.00 | 0.00 |

|      |      |          |    |         |        |         |      |      |
|------|------|----------|----|---------|--------|---------|------|------|
| ATOM | 1409 | HG2 ARG  | 87 | -5.981  | -5.116 | -10.161 | 1.00 | 0.00 |
| ATOM | 1410 | HG3 ARG  | 87 | -7.722  | -5.156 | -9.796  | 1.00 | 0.00 |
| ATOM | 1411 | CD ARG   | 87 | -6.908  | -3.208 | -10.035 | 1.00 | 0.00 |
| ATOM | 1412 | HD2 ARG  | 87 | -6.092  | -2.617 | -9.619  | 1.00 | 0.00 |
| ATOM | 1413 | HD3 ARG  | 87 | -6.886  | -3.142 | -11.123 | 1.00 | 0.00 |
| ATOM | 1414 | NE ARG   | 87 | -8.163  | -2.661 | -9.563  | 1.00 | 0.00 |
| ATOM | 1415 | HE ARG   | 87 | -8.848  | -3.290 | -9.170  | 1.00 | 0.00 |
| ATOM | 1416 | CZ ARG   | 87 | -8.426  | -1.338 | -9.556  | 1.00 | 0.00 |
| ATOM | 1417 | NH1 ARG  | 87 | -7.546  | -0.458 | -10.015 | 1.00 | 0.00 |
| ATOM | 1418 | HH11 ARG | 87 | -6.660  | -0.777 | -10.379 | 1.00 | 0.00 |
| ATOM | 1419 | HH12 ARG | 87 | -7.767  | 0.528  | -9.999  | 1.00 | 0.00 |
| ATOM | 1420 | NH2 ARG  | 87 | -9.657  | -0.910 | -9.139  | 1.00 | 0.00 |
| ATOM | 1421 | HH21 ARG | 87 | -10.349 | -1.583 | -8.844  | 1.00 | 0.00 |
| ATOM | 1422 | HH22 ARG | 87 | -9.868  | 0.078  | -9.129  | 1.00 | 0.00 |
| ATOM | 1423 | C ARG    | 87 | -5.345  | -6.809 | -8.535  | 1.00 | 0.00 |
| ATOM | 1424 | O ARG    | 87 | -5.783  | -7.702 | -9.224  | 1.00 | 0.00 |
| ATOM | 1425 | N TRP    | 88 | -4.041  | -6.516 | -8.551  | 1.00 | 0.00 |
| ATOM | 1426 | H TRP    | 88 | -3.740  | -5.773 | -7.937  | 1.00 | 0.00 |
| ATOM | 1427 | CA TRP   | 88 | -3.063  | -7.098 | -9.466  | 1.00 | 0.00 |
| ATOM | 1428 | HA TRP   | 88 | -3.563  | -7.489 | -10.352 | 1.00 | 0.00 |
| ATOM | 1429 | CB TRP   | 88 | -2.081  | -6.043 | -9.895  | 1.00 | 0.00 |
| ATOM | 1430 | HB2 TRP  | 88 | -1.796  | -5.504 | -8.992  | 1.00 | 0.00 |

|      |      |         |    |        |         |         |      |      |
|------|------|---------|----|--------|---------|---------|------|------|
| ATOM | 1431 | HB3 TRP | 88 | -1.184 | -6.370  | -10.421 | 1.00 | 0.00 |
| ATOM | 1432 | CG TRP  | 88 | -2.770 | -5.043  | -10.796 | 1.00 | 0.00 |
| ATOM | 1433 | CD1 TRP | 88 | -3.284 | -3.813  | -10.476 | 1.00 | 0.00 |
| ATOM | 1434 | HD1 TRP | 88 | -3.124 | -3.454  | -9.460  | 1.00 | 0.00 |
| ATOM | 1435 | NE1 TRP | 88 | -3.905 | -3.292  | -11.540 | 1.00 | 0.00 |
| ATOM | 1436 | HE1 TRP | 88 | -4.290 | -2.359  | -11.588 | 1.00 | 0.00 |
| ATOM | 1437 | CE2 TRP | 88 | -3.856 | -4.193  | -12.583 | 1.00 | 0.00 |
| ATOM | 1438 | CZ2 TRP | 88 | -4.335 | -4.098  | -13.897 | 1.00 | 0.00 |
| ATOM | 1439 | HZ2 TRP | 88 | -4.835 | -3.185  | -14.223 | 1.00 | 0.00 |
| ATOM | 1440 | CH2 TRP | 88 | -4.141 | -5.158  | -14.676 | 1.00 | 0.00 |
| ATOM | 1441 | HH2 TRP | 88 | -4.583 | -5.148  | -15.673 | 1.00 | 0.00 |
| ATOM | 1442 | CZ3 TRP | 88 | -3.410 | -6.261  | -14.278 | 1.00 | 0.00 |
| ATOM | 1443 | HZ3 TRP | 88 | -3.213 | -7.090  | -14.957 | 1.00 | 0.00 |
| ATOM | 1444 | CE3 TRP | 88 | -2.917 | -6.338  | -13.024 | 1.00 | 0.00 |
| ATOM | 1445 | HE3 TRP | 88 | -2.388 | -7.245  | -12.731 | 1.00 | 0.00 |
| ATOM | 1446 | CD2 TRP | 88 | -3.133 | -5.281  | -12.161 | 1.00 | 0.00 |
| ATOM | 1447 | C TRP   | 88 | -2.351 | -8.311  | -8.961  | 1.00 | 0.00 |
| ATOM | 1448 | O TRP   | 88 | -1.514 | -8.814  | -9.659  | 1.00 | 0.00 |
| ATOM | 1449 | N SER   | 89 | -2.837 | -8.823  | -7.849  | 1.00 | 0.00 |
| ATOM | 1450 | H SER   | 89 | -3.611 | -8.334  | -7.422  | 1.00 | 0.00 |
| ATOM | 1451 | CA SER  | 89 | -2.281 | -9.975  | -7.155  | 1.00 | 0.00 |
| ATOM | 1452 | HA SER  | 89 | -1.432 | -10.387 | -7.700  | 1.00 | 0.00 |

|      |      |      |     |    |        |         |        |      |      |
|------|------|------|-----|----|--------|---------|--------|------|------|
| ATOM | 1453 | CB   | SER | 89 | -1.792 | -9.504  | -5.753 | 1.00 | 0.00 |
| ATOM | 1454 | HB2  | SER | 89 | -2.591 | -8.989  | -5.220 | 1.00 | 0.00 |
| ATOM | 1455 | HB3  | SER | 89 | -1.448 | -10.351 | -5.161 | 1.00 | 0.00 |
| ATOM | 1456 | OG   | SER | 89 | -0.704 | -8.600  | -5.969 | 1.00 | 0.00 |
| ATOM | 1457 | HG   | SER | 89 | -0.375 | -8.287  | -5.123 | 1.00 | 0.00 |
| ATOM | 1458 | C    | SER | 89 | -3.248 | -11.121 | -7.063 | 1.00 | 0.00 |
| ATOM | 1459 | O    | SER | 89 | -2.989 | -12.041 | -6.340 | 1.00 | 0.00 |
| ATOM | 1460 | N    | GLN | 90 | -4.357 | -11.081 | -7.778 | 1.00 | 0.00 |
| ATOM | 1461 | H    | GLN | 90 | -4.569 | -10.285 | -8.363 | 1.00 | 0.00 |
| ATOM | 1462 | CA   | GLN | 90 | -5.355 | -12.171 | -7.688 | 1.00 | 0.00 |
| ATOM | 1463 | HA   | GLN | 90 | -5.613 | -12.338 | -6.642 | 1.00 | 0.00 |
| ATOM | 1464 | CB   | GLN | 90 | -6.643 | -11.823 | -8.464 | 1.00 | 0.00 |
| ATOM | 1465 | HB2  | GLN | 90 | -6.461 | -12.108 | -9.500 | 1.00 | 0.00 |
| ATOM | 1466 | HB3  | GLN | 90 | -7.429 | -12.452 | -8.047 | 1.00 | 0.00 |
| ATOM | 1467 | CG   | GLN | 90 | -7.081 | -10.355 | -8.408 | 1.00 | 0.00 |
| ATOM | 1468 | HG2  | GLN | 90 | -6.779 | -9.969  | -7.434 | 1.00 | 0.00 |
| ATOM | 1469 | HG3  | GLN | 90 | -6.535 | -9.830  | -9.192 | 1.00 | 0.00 |
| ATOM | 1470 | CD   | GLN | 90 | -8.556 | -10.096 | -8.592 | 1.00 | 0.00 |
| ATOM | 1471 | OE1  | GLN | 90 | -9.354 | -11.017 | -8.793 | 1.00 | 0.00 |
| ATOM | 1472 | NE2  | GLN | 90 | -8.935 | -8.812  | -8.523 | 1.00 | 0.00 |
| ATOM | 1473 | HE21 | GLN | 90 | -9.909 | -8.569  | -8.638 | 1.00 | 0.00 |
| ATOM | 1474 | HE22 | GLN | 90 | -8.245 | -8.093  | -8.357 | 1.00 | 0.00 |

|      |      |     |     |    |        |         |        |      |      |
|------|------|-----|-----|----|--------|---------|--------|------|------|
| ATOM | 1475 | C   | GLN | 90 | -4.781 | -13.515 | -8.202 | 1.00 | 0.00 |
| ATOM | 1476 | O   | GLN | 90 | -4.775 | -14.533 | -7.486 | 1.00 | 0.00 |
| ATOM | 1477 | OXT | GLN | 90 | -4.322 | -13.577 | -9.340 | 1.00 | 0.00 |
| TER  |      |     |     |    |        |         |        |      |      |
| ATOM | 1478 | CI1 | LIG | 91 | 18.207 | -9.451  | -5.346 | 1.00 | 0.00 |
| ATOM | 1479 | CI2 | LIG | 91 | 19.217 | -12.149 | -5.971 | 1.00 | 0.00 |
| ATOM | 1480 | P1  | LIG | 91 | 17.070 | -13.496 | -2.125 | 1.00 | 0.00 |
| ATOM | 1481 | O1  | LIG | 91 | 16.590 | -14.964 | -2.527 | 1.00 | 0.00 |
| ATOM | 1482 | O2  | LIG | 91 | 18.386 | -13.788 | -1.291 | 1.00 | 0.00 |
| ATOM | 1483 | O3  | LIG | 91 | 17.599 | -12.947 | -3.585 | 1.00 | 0.00 |
| ATOM | 1484 | O4  | LIG | 91 | 16.117 | -12.584 | -1.478 | 1.00 | 0.00 |
| ATOM | 1485 | C1  | LIG | 91 | 15.396 | -15.178 | -3.313 | 1.00 | 0.00 |
| ATOM | 1486 | H1  | LIG | 91 | 15.233 | -16.254 | -3.320 | 1.00 | 0.00 |
| ATOM | 1487 | H2  | LIG | 91 | 15.550 | -14.817 | -4.331 | 1.00 | 0.00 |
| ATOM | 1488 | H3  | LIG | 91 | 14.545 | -14.674 | -2.852 | 1.00 | 0.00 |
| ATOM | 1489 | C2  | LIG | 91 | 19.447 | -14.659 | -1.747 | 1.00 | 0.00 |
| ATOM | 1490 | H4  | LIG | 91 | 19.828 | -14.319 | -2.711 | 1.00 | 0.00 |
| ATOM | 1491 | H5  | LIG | 91 | 19.080 | -15.683 | -1.823 | 1.00 | 0.00 |
| ATOM | 1492 | H6  | LIG | 91 | 20.227 | -14.593 | -0.992 | 1.00 | 0.00 |
| ATOM | 1493 | C3  | LIG | 91 | 17.586 | -11.609 | -3.886 | 1.00 | 0.00 |
| ATOM | 1494 | H7  | LIG | 91 | 16.990 | -10.967 | -3.249 | 1.00 | 0.00 |
| ATOM | 1495 | C4  | LIG | 91 | 18.259 | -11.141 | -4.935 | 1.00 | 0.00 |

TER

|      |      |     |     |    |         |        |       |      |      |
|------|------|-----|-----|----|---------|--------|-------|------|------|
| ATOM | 1496 | Cl1 | LIG | 92 | -14.663 | 13.998 | 1.545 | 1.00 | 0.00 |
| ATOM | 1497 | Cl2 | LIG | 92 | -14.203 | 14.661 | 4.379 | 1.00 | 0.00 |
| ATOM | 1498 | P1  | LIG | 92 | -16.003 | 18.781 | 3.378 | 1.00 | 0.00 |
| ATOM | 1499 | O1  | LIG | 92 | -16.767 | 19.131 | 4.734 | 1.00 | 0.00 |
| ATOM | 1500 | O2  | LIG | 92 | -14.653 | 19.597 | 3.530 | 1.00 | 0.00 |
| ATOM | 1501 | O3  | LIG | 92 | -15.593 | 17.211 | 3.665 | 1.00 | 0.00 |
| ATOM | 1502 | O4  | LIG | 92 | -16.698 | 18.968 | 2.097 | 1.00 | 0.00 |
| ATOM | 1503 | C1  | LIG | 92 | -18.075 | 18.589 | 5.025 | 1.00 | 0.00 |
| ATOM | 1504 | H1  | LIG | 92 | -18.412 | 19.092 | 5.929 | 1.00 | 0.00 |
| ATOM | 1505 | H2  | LIG | 92 | -18.003 | 17.515 | 5.200 | 1.00 | 0.00 |
| ATOM | 1506 | H3  | LIG | 92 | -18.762 | 18.797 | 4.203 | 1.00 | 0.00 |
| ATOM | 1507 | C2  | LIG | 92 | -13.820 | 19.554 | 4.713 | 1.00 | 0.00 |
| ATOM | 1508 | H4  | LIG | 92 | -13.522 | 18.527 | 4.929 | 1.00 | 0.00 |
| ATOM | 1509 | H5  | LIG | 92 | -14.357 | 19.981 | 5.560 | 1.00 | 0.00 |
| ATOM | 1510 | H6  | LIG | 92 | -12.946 | 20.156 | 4.477 | 1.00 | 0.00 |
| ATOM | 1511 | C3  | LIG | 92 | -15.427 | 16.322 | 2.636 | 1.00 | 0.00 |
| ATOM | 1512 | H7  | LIG | 92 | -15.818 | 16.611 | 1.668 | 1.00 | 0.00 |
| ATOM | 1513 | C4  | LIG | 92 | -14.834 | 15.147 | 2.839 | 1.00 | 0.00 |

TER

|      |      |     |     |    |        |         |        |      |      |
|------|------|-----|-----|----|--------|---------|--------|------|------|
| ATOM | 1514 | Cl1 | LIG | 93 | 9.915  | -10.646 | 17.154 | 1.00 | 0.00 |
| ATOM | 1515 | Cl2 | LIG | 93 | 11.703 | -9.031  | 15.457 | 1.00 | 0.00 |

|      |      |     |     |    |        |         |        |      |      |
|------|------|-----|-----|----|--------|---------|--------|------|------|
| ATOM | 1516 | P1  | LIG | 93 | 15.152 | -10.868 | 17.895 | 1.00 | 0.00 |
| ATOM | 1517 | O1  | LIG | 93 | 16.294 | -10.990 | 16.787 | 1.00 | 0.00 |
| ATOM | 1518 | O2  | LIG | 93 | 15.555 | -9.534  | 18.649 | 1.00 | 0.00 |
| ATOM | 1519 | O3  | LIG | 93 | 13.865 | -10.458 | 16.951 | 1.00 | 0.00 |
| ATOM | 1520 | O4  | LIG | 93 | 14.880 | -12.016 | 18.771 | 1.00 | 0.00 |
| ATOM | 1521 | C1  | LIG | 93 | 16.321 | -12.091 | 15.849 | 1.00 | 0.00 |
| ATOM | 1522 | H1  | LIG | 93 | 17.263 | -12.001 | 15.312 | 1.00 | 0.00 |
| ATOM | 1523 | H2  | LIG | 93 | 15.484 | -12.008 | 15.154 | 1.00 | 0.00 |
| ATOM | 1524 | H3  | LIG | 93 | 16.284 | -13.042 | 16.382 | 1.00 | 0.00 |
| ATOM | 1525 | C2  | LIG | 93 | 15.865 | -8.293  | 17.972 | 1.00 | 0.00 |
| ATOM | 1526 | H4  | LIG | 93 | 15.029 | -7.987  | 17.342 | 1.00 | 0.00 |
| ATOM | 1527 | H5  | LIG | 93 | 16.768 | -8.413  | 17.373 | 1.00 | 0.00 |
| ATOM | 1528 | H6  | LIG | 93 | 16.028 | -7.562  | 18.760 | 1.00 | 0.00 |
| ATOM | 1529 | C3  | LIG | 93 | 12.585 | -10.775 | 17.322 | 1.00 | 0.00 |
| ATOM | 1530 | H7  | LIG | 93 | 12.468 | -11.512 | 18.107 | 1.00 | 0.00 |
| ATOM | 1531 | C4  | LIG | 93 | 11.541 | -10.212 | 16.716 | 1.00 | 0.00 |
| TER  |      |     |     |    |        |         |        |      |      |
| ATOM | 1532 | Cl1 | LIG | 94 | 15.096 | -21.573 | 7.956  | 1.00 | 0.00 |
| ATOM | 1533 | Cl2 | LIG | 94 | 15.208 | -19.432 | 9.979  | 1.00 | 0.00 |
| ATOM | 1534 | P1  | LIG | 94 | 15.546 | -16.525 | 6.422  | 1.00 | 0.00 |
| ATOM | 1535 | O1  | LIG | 94 | 14.742 | -15.260 | 6.969  | 1.00 | 0.00 |
| ATOM | 1536 | O2  | LIG | 94 | 17.051 | -16.109 | 6.687  | 1.00 | 0.00 |

|      |      |     |     |    |        |         |         |      |      |
|------|------|-----|-----|----|--------|---------|---------|------|------|
| ATOM | 1537 | O3  | LIG | 94 | 15.192 | -17.630 | 7.592   | 1.00 | 0.00 |
| ATOM | 1538 | O4  | LIG | 94 | 15.269 | -17.016 | 5.065   | 1.00 | 0.00 |
| ATOM | 1539 | C1  | LIG | 94 | 13.298 | -15.206 | 6.924   | 1.00 | 0.00 |
| ATOM | 1540 | H1  | LIG | 94 | 13.028 | -14.196 | 7.225   | 1.00 | 0.00 |
| ATOM | 1541 | H2  | LIG | 94 | 12.876 | -15.930 | 7.623   | 1.00 | 0.00 |
| ATOM | 1542 | H3  | LIG | 94 | 12.944 | -15.401 | 5.910   | 1.00 | 0.00 |
| ATOM | 1543 | C2  | LIG | 94 | 17.531 | -15.599 | 7.953   | 1.00 | 0.00 |
| ATOM | 1544 | H4  | LIG | 94 | 17.320 | -16.311 | 8.752   | 1.00 | 0.00 |
| ATOM | 1545 | H5  | LIG | 94 | 17.063 | -14.638 | 8.167   | 1.00 | 0.00 |
| ATOM | 1546 | H6  | LIG | 94 | 18.605 | -15.478 | 7.833   | 1.00 | 0.00 |
| ATOM | 1547 | C3  | LIG | 94 | 15.174 | -18.973 | 7.317   | 1.00 | 0.00 |
| ATOM | 1548 | H7  | LIG | 94 | 15.145 | -19.261 | 6.273   | 1.00 | 0.00 |
| ATOM | 1549 | C4  | LIG | 94 | 15.165 | -19.869 | 8.301   | 1.00 | 0.00 |
| TER  |      |     |     |    |        |         |         |      |      |
| ATOM | 1550 | CI1 | LIG | 95 | 12.076 | 15.485  | -18.787 | 1.00 | 0.00 |
| ATOM | 1551 | CI2 | LIG | 95 | 14.560 | 14.428  | -19.969 | 1.00 | 0.00 |
| ATOM | 1552 | P1  | LIG | 95 | 15.291 | 12.452  | -15.873 | 1.00 | 0.00 |
| ATOM | 1553 | O1  | LIG | 95 | 16.008 | 11.092  | -16.300 | 1.00 | 0.00 |
| ATOM | 1554 | O2  | LIG | 95 | 16.518 | 13.366  | -15.461 | 1.00 | 0.00 |
| ATOM | 1555 | O3  | LIG | 95 | 14.813 | 13.011  | -17.347 | 1.00 | 0.00 |
| ATOM | 1556 | O4  | LIG | 95 | 14.197 | 12.406  | -14.892 | 1.00 | 0.00 |
| ATOM | 1557 | C1  | LIG | 95 | 15.249 | 9.950   | -16.757 | 1.00 | 0.00 |



|      |      |     |     |    |         |        |         |      |      |
|------|------|-----|-----|----|---------|--------|---------|------|------|
| ATOM | 1558 | H1  | LIG | 95 | 15.963  | 9.134  | -16.845 | 1.00 | 0.00 |
| ATOM | 1559 | H2  | LIG | 95 | 14.804  | 10.163 | -17.730 | 1.00 | 0.00 |
| ATOM | 1560 | H3  | LIG | 95 | 14.477  | 9.694  | -16.030 | 1.00 | 0.00 |
| ATOM | 1561 | C2  | LIG | 95 | 17.696  | 13.545 | -16.282 | 1.00 | 0.00 |
| ATOM | 1562 | H4  | LIG | 95 | 17.416  | 13.923 | -17.267 | 1.00 | 0.00 |
| ATOM | 1563 | H5  | LIG | 95 | 18.230  | 12.599 | -16.376 | 1.00 | 0.00 |
| ATOM | 1564 | H6  | LIG | 95 | 18.309  | 14.276 | -15.761 | 1.00 | 0.00 |
| ATOM | 1565 | C3  | LIG | 95 | 13.715  | 13.821 | -17.476 | 1.00 | 0.00 |
| ATOM | 1566 | H7  | LIG | 95 | 13.038  | 13.870 | -16.632 | 1.00 | 0.00 |
| ATOM | 1567 | C4  | LIG | 95 | 13.492  | 14.491 | -18.604 | 1.00 | 0.00 |
| TER  |      |     |     |    |         |        |         |      |      |
| ATOM | 1568 | Cl1 | LIG | 96 | -19.927 | -0.113 | 13.122  | 1.00 | 0.00 |
| ATOM | 1569 | Cl2 | LIG | 96 | -18.323 | -2.140 | 14.539  | 1.00 | 0.00 |
| ATOM | 1570 | P1  | LIG | 96 | -17.911 | 0.992  | 17.892  | 1.00 | 0.00 |
| ATOM | 1571 | O1  | LIG | 96 | -17.906 | 0.067  | 19.191  | 1.00 | 0.00 |
| ATOM | 1572 | O2  | LIG | 96 | -16.367 | 1.273  | 17.671  | 1.00 | 0.00 |
| ATOM | 1573 | O3  | LIG | 96 | -18.316 | -0.115 | 16.740  | 1.00 | 0.00 |
| ATOM | 1574 | O4  | LIG | 96 | -18.766 | 2.187  | 17.867  | 1.00 | 0.00 |
| ATOM | 1575 | C1  | LIG | 96 | -19.134 | -0.438 | 19.763  | 1.00 | 0.00 |
| ATOM | 1576 | H1  | LIG | 96 | -18.853 | -0.912 | 20.700  | 1.00 | 0.00 |
| ATOM | 1577 | H2  | LIG | 96 | -19.583 | -1.172 | 19.092  | 1.00 | 0.00 |
| ATOM | 1578 | H3  | LIG | 96 | -19.828 | 0.383  | 19.952  | 1.00 | 0.00 |

|      |      |    |     |    |         |        |        |      |      |
|------|------|----|-----|----|---------|--------|--------|------|------|
| ATOM | 1579 | C2 | LIG | 96 | -15.357 | 0.237  | 17.662 | 1.00 | 0.00 |
| ATOM | 1580 | H4 | LIG | 96 | -15.590 | -0.512 | 16.903 | 1.00 | 0.00 |
| ATOM | 1581 | H5 | LIG | 96 | -15.293 | -0.227 | 18.647 | 1.00 | 0.00 |
| ATOM | 1582 | H6 | LIG | 96 | -14.424 | 0.739  | 17.419 | 1.00 | 0.00 |
| ATOM | 1583 | C3 | LIG | 96 | -18.974 | 0.259  | 15.598 | 1.00 | 0.00 |
| ATOM | 1584 | H7 | LIG | 96 | -19.437 | 1.238  | 15.594 | 1.00 | 0.00 |
| ATOM | 1585 | C4 | LIG | 96 | -19.054 | -0.567 | 14.557 | 1.00 | 0.00 |

TER

|      |      |     |     |    |        |        |        |      |      |
|------|------|-----|-----|----|--------|--------|--------|------|------|
| ATOM | 1586 | Cl1 | LIG | 97 | 13.475 | 16.688 | -4.206 | 1.00 | 0.00 |
| ATOM | 1587 | Cl2 | LIG | 97 | 11.587 | 18.499 | -2.848 | 1.00 | 0.00 |
| ATOM | 1588 | P1  | LIG | 97 | 15.234 | 21.204 | -2.074 | 1.00 | 0.00 |
| ATOM | 1589 | O1  | LIG | 97 | 14.580 | 22.655 | -2.176 | 1.00 | 0.00 |
| ATOM | 1590 | O2  | LIG | 97 | 15.289 | 20.968 | -0.508 | 1.00 | 0.00 |
| ATOM | 1591 | O3  | LIG | 97 | 13.981 | 20.275 | -2.605 | 1.00 | 0.00 |
| ATOM | 1592 | O4  | LIG | 97 | 16.492 | 20.934 | -2.785 | 1.00 | 0.00 |
| ATOM | 1593 | C1  | LIG | 97 | 14.338 | 23.285 | -3.455 | 1.00 | 0.00 |
| ATOM | 1594 | H1  | LIG | 97 | 14.022 | 24.302 | -3.231 | 1.00 | 0.00 |
| ATOM | 1595 | H2  | LIG | 97 | 13.545 | 22.757 | -3.987 | 1.00 | 0.00 |
| ATOM | 1596 | H3  | LIG | 97 | 15.253 | 23.300 | -4.048 | 1.00 | 0.00 |
| ATOM | 1597 | C2  | LIG | 97 | 14.162 | 21.178 | 0.375  | 1.00 | 0.00 |
| ATOM | 1598 | H4  | LIG | 97 | 13.314 | 20.571 | 0.056  | 1.00 | 0.00 |
| ATOM | 1599 | H5  | LIG | 97 | 13.891 | 22.235 | 0.385  | 1.00 | 0.00 |

|      |      |     |     |    |        |        |         |      |      |
|------|------|-----|-----|----|--------|--------|---------|------|------|
| ATOM | 1600 | H6  | LIG | 97 | 14.498 | 20.865 | 1.360   | 1.00 | 0.00 |
| ATOM | 1601 | C3  | LIG | 97 | 14.202 | 19.068 | -3.216  | 1.00 | 0.00 |
| ATOM | 1602 | H7  | LIG | 97 | 15.209 | 18.869 | -3.561  | 1.00 | 0.00 |
| ATOM | 1603 | C4  | LIG | 97 | 13.207 | 18.202 | -3.391  | 1.00 | 0.00 |
| TER  |      |     |     |    |        |        |         |      |      |
| ATOM | 1604 | Cl1 | LIG | 98 | -6.973 | 5.832  | -19.747 | 1.00 | 0.00 |
| ATOM | 1605 | Cl2 | LIG | 98 | -4.355 | 4.479  | -19.795 | 1.00 | 0.00 |
| ATOM | 1606 | P1  | LIG | 98 | -2.720 | 8.258  | -17.731 | 1.00 | 0.00 |
| ATOM | 1607 | O1  | LIG | 98 | -1.599 | 7.639  | -16.779 | 1.00 | 0.00 |
| ATOM | 1608 | O2  | LIG | 98 | -1.869 | 8.770  | -18.966 | 1.00 | 0.00 |
| ATOM | 1609 | O3  | LIG | 98 | -3.456 | 6.881  | -18.257 | 1.00 | 0.00 |
| ATOM | 1610 | O4  | LIG | 98 | -3.664 | 9.240  | -17.180 | 1.00 | 0.00 |
| ATOM | 1611 | C1  | LIG | 98 | -1.936 | 7.044  | -15.505 | 1.00 | 0.00 |
| ATOM | 1612 | H1  | LIG | 98 | -0.988 | 6.835  | -15.014 | 1.00 | 0.00 |
| ATOM | 1613 | H2  | LIG | 98 | -2.488 | 6.116  | -15.661 | 1.00 | 0.00 |
| ATOM | 1614 | H3  | LIG | 98 | -2.522 | 7.742  | -14.905 | 1.00 | 0.00 |
| ATOM | 1615 | C2  | LIG | 98 | -0.884 | 7.961  | -19.651 | 1.00 | 0.00 |
| ATOM | 1616 | H4  | LIG | 98 | -1.340 | 7.042  | -20.020 | 1.00 | 0.00 |
| ATOM | 1617 | H5  | LIG | 98 | -0.058 | 7.732  | -18.976 | 1.00 | 0.00 |
| ATOM | 1618 | H6  | LIG | 98 | -0.534 | 8.567  | -20.483 | 1.00 | 0.00 |
| ATOM | 1619 | C3  | LIG | 98 | -4.774 | 6.880  | -18.631 | 1.00 | 0.00 |
| ATOM | 1620 | H7  | LIG | 98 | -5.371 | 7.733  | -18.333 | 1.00 | 0.00 |

ATOM 1621 C4 LIG 98 -5.289 5.856 -19.309 1.00 0.00

TER

ATOM 1622 CI1 LIG 99 -11.378 -23.368 -16.289 1.00 0.00

ATOM 1623 CI2 LIG 99 -13.591 -21.516 -16.890 1.00 0.00

ATOM 1624 P1 LIG 99 -11.643 -18.696 -13.813 1.00 0.00

ATOM 1625 O1 LIG 99 -11.958 -17.267 -14.449 1.00 0.00

ATOM 1626 O2 LIG 99 -12.777 -18.834 -12.715 1.00 0.00

ATOM 1627 O3 LIG 99 -12.115 -19.680 -15.047 1.00 0.00

ATOM 1628 O4 LIG 99 -10.283 -18.983 -13.337 1.00 0.00

ATOM 1629 C1 LIG 99 -11.149 -16.721 -15.516 1.00 0.00

ATOM 1630 H1 LIG 99 -11.494 -15.699 -15.658 1.00 0.00

ATOM 1631 H2 LIG 99 -11.301 -17.297 -16.430 1.00 0.00

ATOM 1632 H3 LIG 99 -10.096 -16.724 -15.232 1.00 0.00

ATOM 1633 C2 LIG 99 -14.180 -18.593 -12.977 1.00 0.00

ATOM 1634 H4 LIG 99 -14.529 -19.236 -13.786 1.00 0.00

ATOM 1635 H5 LIG 99 -14.335 -17.544 -13.231 1.00 0.00

ATOM 1636 H6 LIG 99 -14.697 -18.839 -12.053 1.00 0.00

ATOM 1637 C3 LIG 99 -11.552 -20.917 -15.222 1.00 0.00

ATOM 1638 H7 LIG 99 -10.629 -21.117 -14.693 1.00 0.00

ATOM 1639 C4 LIG 99 -12.114 -21.813 -16.031 1.00 0.00

TER

ATOM 1640 CI1 LIG 100 -3.097 -13.473 18.003 1.00 0.00

|      |      |     |     |     |        |         |        |      |      |
|------|------|-----|-----|-----|--------|---------|--------|------|------|
| ATOM | 1641 | CI2 | LIG | 100 | -5.165 | -14.767 | 16.348 | 1.00 | 0.00 |
| ATOM | 1642 | P1  | LIG | 100 | -2.935 | -12.984 | 12.733 | 1.00 | 0.00 |
| ATOM | 1643 | O1  | LIG | 100 | -3.146 | -14.124 | 11.637 | 1.00 | 0.00 |
| ATOM | 1644 | O2  | LIG | 100 | -4.055 | -11.932 | 12.347 | 1.00 | 0.00 |
| ATOM | 1645 | O3  | LIG | 100 | -3.510 | -13.751 | 14.074 | 1.00 | 0.00 |
| ATOM | 1646 | O4  | LIG | 100 | -1.594 | -12.417 | 12.926 | 1.00 | 0.00 |
| ATOM | 1647 | C1  | LIG | 100 | -2.318 | -15.308 | 11.611 | 1.00 | 0.00 |
| ATOM | 1648 | H1  | LIG | 100 | -2.582 | -15.836 | 10.697 | 1.00 | 0.00 |
| ATOM | 1649 | H2  | LIG | 100 | -2.534 | -15.933 | 12.479 | 1.00 | 0.00 |
| ATOM | 1650 | H3  | LIG | 100 | -1.263 | -15.031 | 11.591 | 1.00 | 0.00 |
| ATOM | 1651 | C2  | LIG | 100 | -5.439 | -12.284 | 12.111 | 1.00 | 0.00 |
| ATOM | 1652 | H4  | LIG | 100 | -5.855 | -12.789 | 12.984 | 1.00 | 0.00 |
| ATOM | 1653 | H5  | LIG | 100 | -5.514 | -12.923 | 11.230 | 1.00 | 0.00 |
| ATOM | 1654 | H6  | LIG | 100 | -5.956 | -11.343 | 11.940 | 1.00 | 0.00 |
| ATOM | 1655 | C3  | LIG | 100 | -3.052 | -13.431 | 15.325 | 1.00 | 0.00 |
| ATOM | 1656 | H7  | LIG | 100 | -2.137 | -12.854 | 15.382 | 1.00 | 0.00 |
| ATOM | 1657 | C4  | LIG | 100 | -3.700 | -13.841 | 16.413 | 1.00 | 0.00 |
| TER  |      |     |     |     |        |         |        |      |      |
| END  |      |     |     |     |        |         |        |      |      |

**Table R:** The number of atoms present in the system of MO-Nap

|      |   |   |     |   |         |        |        |      |      |
|------|---|---|-----|---|---------|--------|--------|------|------|
| ATOM | 1 | N | PRO | 1 | -12.580 | 11.355 | -7.801 | 1.00 | 0.00 |
|------|---|---|-----|---|---------|--------|--------|------|------|

|      |    |     |     |   |         |        |         |      |      |
|------|----|-----|-----|---|---------|--------|---------|------|------|
| ATOM | 2  | H2  | PRO | 1 | -12.935 | 10.425 | -7.629  | 1.00 | 0.00 |
| ATOM | 3  | H3  | PRO | 1 | -13.205 | 12.084 | -8.118  | 1.00 | 0.00 |
| ATOM | 4  | CD  | PRO | 1 | -11.975 | 11.903 | -6.566  | 1.00 | 0.00 |
| ATOM | 5  | HD2 | PRO | 1 | -11.961 | 11.127 | -5.802  | 1.00 | 0.00 |
| ATOM | 6  | HD3 | PRO | 1 | -12.576 | 12.744 | -6.218  | 1.00 | 0.00 |
| ATOM | 7  | CG  | PRO | 1 | -10.589 | 12.323 | -6.992  | 1.00 | 0.00 |
| ATOM | 8  | HG2 | PRO | 1 | -9.871  | 11.790 | -6.369  | 1.00 | 0.00 |
| ATOM | 9  | HG3 | PRO | 1 | -10.495 | 13.395 | -6.818  | 1.00 | 0.00 |
| ATOM | 10 | CB  | PRO | 1 | -10.399 | 11.994 | -8.464  | 1.00 | 0.00 |
| ATOM | 11 | HB2 | PRO | 1 | -9.463  | 11.455 | -8.604  | 1.00 | 0.00 |
| ATOM | 12 | HB3 | PRO | 1 | -10.396 | 12.894 | -9.080  | 1.00 | 0.00 |
| ATOM | 13 | CA  | PRO | 1 | -11.583 | 11.095 | -8.855  | 1.00 | 0.00 |
| ATOM | 14 | HA  | PRO | 1 | -12.021 | 11.403 | -9.805  | 1.00 | 0.00 |
| ATOM | 15 | C   | PRO | 1 | -11.156 | 9.608  | -8.942  | 1.00 | 0.00 |
| ATOM | 16 | O   | PRO | 1 | -11.430 | 8.819  | -8.018  | 1.00 | 0.00 |
| ATOM | 17 | N   | PRO | 2 | -10.530 | 9.220  | -10.058 | 1.00 | 0.00 |
| ATOM | 18 | CD  | PRO | 2 | -10.126 | 10.091 | -11.167 | 1.00 | 0.00 |
| ATOM | 19 | HD2 | PRO | 2 | -9.363  | 10.783 | -10.810 | 1.00 | 0.00 |
| ATOM | 20 | HD3 | PRO | 2 | -10.996 | 10.654 | -11.505 | 1.00 | 0.00 |
| ATOM | 21 | CG  | PRO | 2 | -9.615  | 9.167  | -12.203 | 1.00 | 0.00 |
| ATOM | 22 | HG2 | PRO | 2 | -8.603  | 9.477  | -12.462 | 1.00 | 0.00 |
| ATOM | 23 | HG3 | PRO | 2 | -10.257 | 9.255  | -13.080 | 1.00 | 0.00 |

|      |    |      |     |   |         |       |         |      |      |
|------|----|------|-----|---|---------|-------|---------|------|------|
| ATOM | 24 | CB   | PRO | 2 | -9.638  | 7.796 | -11.671 | 1.00 | 0.00 |
| ATOM | 25 | HB2  | PRO | 2 | -8.624  | 7.400 | -11.719 | 1.00 | 0.00 |
| ATOM | 26 | HB3  | PRO | 2 | -10.307 | 7.151 | -12.240 | 1.00 | 0.00 |
| ATOM | 27 | CA   | PRO | 2 | -10.095 | 7.870 | -10.227 | 1.00 | 0.00 |
| ATOM | 28 | HA   | PRO | 2 | -10.944 | 7.212 | -10.040 | 1.00 | 0.00 |
| ATOM | 29 | C    | PRO | 2 | -8.952  | 7.512 | -9.273  | 1.00 | 0.00 |
| ATOM | 30 | O    | PRO | 2 | -8.209  | 8.332 | -8.823  | 1.00 | 0.00 |
| ATOM | 31 | N    | THR | 3 | -8.803  | 6.230 | -9.046  | 1.00 | 0.00 |
| ATOM | 32 | H    | THR | 3 | -9.315  | 5.537 | -9.573  | 1.00 | 0.00 |
| ATOM | 33 | CA   | THR | 3 | -7.903  | 5.779 | -8.021  | 1.00 | 0.00 |
| ATOM | 34 | HA   | THR | 3 | -8.236  | 6.222 | -7.082  | 1.00 | 0.00 |
| ATOM | 35 | CB   | THR | 3 | -8.014  | 4.252 | -7.909  | 1.00 | 0.00 |
| ATOM | 36 | HB   | THR | 3 | -7.721  | 3.808 | -8.860  | 1.00 | 0.00 |
| ATOM | 37 | CG2  | THR | 3 | -7.142  | 3.742 | -6.840  | 1.00 | 0.00 |
| ATOM | 38 | HG21 | THR | 3 | -7.435  | 4.186 | -5.889  | 1.00 | 0.00 |
| ATOM | 39 | HG22 | THR | 3 | -7.237  | 2.658 | -6.779  | 1.00 | 0.00 |
| ATOM | 40 | HG23 | THR | 3 | -6.107  | 4.004 | -7.059  | 1.00 | 0.00 |
| ATOM | 41 | OG1  | THR | 3 | -9.371  | 3.945 | -7.510  | 1.00 | 0.00 |
| ATOM | 42 | HG1  | THR | 3 | -9.474  | 2.994 | -7.431  | 1.00 | 0.00 |
| ATOM | 43 | C    | THR | 3 | -6.484  | 6.141 | -8.316  | 1.00 | 0.00 |
| ATOM | 44 | O    | THR | 3 | -5.782  | 6.599 | -7.434  | 1.00 | 0.00 |
| ATOM | 45 | N    | LEU | 4 | -6.067  | 5.949 | -9.565  | 1.00 | 0.00 |

|      |    |      |     |   |        |        |         |      |      |
|------|----|------|-----|---|--------|--------|---------|------|------|
| ATOM | 46 | H    | LEU | 4 | -6.622 | 5.563  | -10.316 | 1.00 | 0.00 |
| ATOM | 47 | CA   | LEU | 4 | -4.648 | 6.271  | -9.835  | 1.00 | 0.00 |
| ATOM | 48 | HA   | LEU | 4 | -4.032 | 5.740  | -9.110  | 1.00 | 0.00 |
| ATOM | 49 | CB   | LEU | 4 | -4.194 | 5.880  | -11.243 | 1.00 | 0.00 |
| ATOM | 50 | HB2  | LEU | 4 | -4.366 | 4.804  | -11.268 | 1.00 | 0.00 |
| ATOM | 51 | HB3  | LEU | 4 | -4.850 | 6.369  | -11.963 | 1.00 | 0.00 |
| ATOM | 52 | CG   | LEU | 4 | -2.760 | 6.167  | -11.596 | 1.00 | 0.00 |
| ATOM | 53 | HG   | LEU | 4 | -2.617 | 7.243  | -11.494 | 1.00 | 0.00 |
| ATOM | 54 | CD1  | LEU | 4 | -1.748 | 5.441  | -10.740 | 1.00 | 0.00 |
| ATOM | 55 | HD11 | LEU | 4 | -1.891 | 4.365  | -10.842 | 1.00 | 0.00 |
| ATOM | 56 | HD12 | LEU | 4 | -0.742 | 5.706  | -11.063 | 1.00 | 0.00 |
| ATOM | 57 | HD13 | LEU | 4 | -1.882 | 5.728  | -9.697  | 1.00 | 0.00 |
| ATOM | 58 | CD2  | LEU | 4 | -2.601 | 5.818  | -13.040 | 1.00 | 0.00 |
| ATOM | 59 | HD21 | LEU | 4 | -3.279 | 6.427  | -13.639 | 1.00 | 0.00 |
| ATOM | 60 | HD22 | LEU | 4 | -1.574 | 6.009  | -13.350 | 1.00 | 0.00 |
| ATOM | 61 | HD23 | LEU | 4 | -2.835 | 4.764  | -13.188 | 1.00 | 0.00 |
| ATOM | 62 | C    | LEU | 4 | -4.378 | 7.748  | -9.621  | 1.00 | 0.00 |
| ATOM | 63 | O    | LEU | 4 | -3.371 | 8.102  | -9.099  | 1.00 | 0.00 |
| ATOM | 64 | N    | GLN | 5 | -5.304 | 8.596  | -10.015 | 1.00 | 0.00 |
| ATOM | 65 | H    | GLN | 5 | -6.120 | 8.303  | -10.533 | 1.00 | 0.00 |
| ATOM | 66 | CA   | GLN | 5 | -5.098 | 10.021 | -9.802  | 1.00 | 0.00 |
| ATOM | 67 | HA   | GLN | 5 | -4.115 | 10.323 | -10.162 | 1.00 | 0.00 |



|      |    |      |     |   |        |        |         |      |      |
|------|----|------|-----|---|--------|--------|---------|------|------|
| ATOM | 68 | CB   | GLN | 5 | -6.172 | 10.809 | -10.583 | 1.00 | 0.00 |
| ATOM | 69 | HB2  | GLN | 5 | -6.042 | 10.579 | -11.641 | 1.00 | 0.00 |
| ATOM | 70 | HB3  | GLN | 5 | -7.147 | 10.451 | -10.251 | 1.00 | 0.00 |
| ATOM | 71 | CG   | GLN | 5 | -6.088 | 12.336 | -10.376 | 1.00 | 0.00 |
| ATOM | 72 | HG2  | GLN | 5 | -6.038 | 12.592 | -9.318  | 1.00 | 0.00 |
| ATOM | 73 | HG3  | GLN | 5 | -5.176 | 12.667 | -10.873 | 1.00 | 0.00 |
| ATOM | 74 | CD   | GLN | 5 | -7.269 | 13.064 | -10.996 | 1.00 | 0.00 |
| ATOM | 75 | OE1  | GLN | 5 | -7.903 | 12.559 | -11.963 | 1.00 | 0.00 |
| ATOM | 76 | NE2  | GLN | 5 | -7.620 | 14.226 | -10.411 | 1.00 | 0.00 |
| ATOM | 77 | HE21 | GLN | 5 | -8.398 | 14.758 | -10.777 | 1.00 | 0.00 |
| ATOM | 78 | HE22 | GLN | 5 | -7.105 | 14.561 | -9.610  | 1.00 | 0.00 |
| ATOM | 79 | C    | GLN | 5 | -5.072 | 10.402 | -8.311  | 1.00 | 0.00 |
| ATOM | 80 | O    | GLN | 5 | -4.204 | 11.177 | -7.892  | 1.00 | 0.00 |
| ATOM | 81 | N    | ARG | 6 | -5.863 | 9.690  | -7.474  | 1.00 | 0.00 |
| ATOM | 82 | H    | ARG | 6 | -6.489 | 8.991  | -7.848  | 1.00 | 0.00 |
| ATOM | 83 | CA   | ARG | 6 | -5.869 | 9.918  | -6.075  | 1.00 | 0.00 |
| ATOM | 84 | HA   | ARG | 6 | -5.989 | 10.984 | -5.878  | 1.00 | 0.00 |
| ATOM | 85 | CB   | ARG | 6 | -7.006 | 9.174  | -5.416  | 1.00 | 0.00 |
| ATOM | 86 | HB2  | ARG | 6 | -6.913 | 8.137  | -5.738  | 1.00 | 0.00 |
| ATOM | 87 | HB3  | ARG | 6 | -6.825 | 9.239  | -4.343  | 1.00 | 0.00 |
| ATOM | 88 | CG   | ARG | 6 | -8.403 | 9.674  | -5.723  | 1.00 | 0.00 |
| ATOM | 89 | HG2  | ARG | 6 | -8.372 | 10.764 | -5.748  | 1.00 | 0.00 |

|      |     |          |   |         |        |        |      |      |
|------|-----|----------|---|---------|--------|--------|------|------|
| ATOM | 90  | HG3 ARG  | 6 | -8.687  | 9.297  | -6.706 | 1.00 | 0.00 |
| ATOM | 91  | CD ARG   | 6 | -9.456  | 9.206  | -4.660 | 1.00 | 0.00 |
| ATOM | 92  | HD2 ARG  | 6 | -9.319  | 9.829  | -3.777 | 1.00 | 0.00 |
| ATOM | 93  | HD3 ARG  | 6 | -10.444 | 9.390  | -5.084 | 1.00 | 0.00 |
| ATOM | 94  | NE ARG   | 6 | -9.371  | 7.788  | -4.257 | 1.00 | 0.00 |
| ATOM | 95  | HE ARG   | 6 | -8.844  | 7.595  | -3.418 | 1.00 | 0.00 |
| ATOM | 96  | CZ ARG   | 6 | -9.935  | 6.757  | -4.913 | 1.00 | 0.00 |
| ATOM | 97  | NH1 ARG  | 6 | -10.667 | 6.939  | -6.013 | 1.00 | 0.00 |
| ATOM | 98  | HH11 ARG | 6 | -10.809 | 7.872  | -6.373 | 1.00 | 0.00 |
| ATOM | 99  | HH12 ARG | 6 | -11.076 | 6.143  | -6.481 | 1.00 | 0.00 |
| ATOM | 100 | NH2 ARG  | 6 | -9.769  | 5.497  | -4.468 | 1.00 | 0.00 |
| ATOM | 101 | HH21 ARG | 6 | -9.219  | 5.326  | -3.639 | 1.00 | 0.00 |
| ATOM | 102 | HH22 ARG | 6 | -10.196 | 4.729  | -4.966 | 1.00 | 0.00 |
| ATOM | 103 | C ARG    | 6 | -4.527  | 9.460  | -5.532 | 1.00 | 0.00 |
| ATOM | 104 | O ARG    | 6 | -3.966  | 10.037 | -4.614 | 1.00 | 0.00 |
| ATOM | 105 | N CYX    | 7 | -4.041  | 8.300  | -6.048 | 1.00 | 0.00 |
| ATOM | 106 | H CYX    | 7 | -4.561  | 7.726  | -6.696 | 1.00 | 0.00 |
| ATOM | 107 | CA CYX   | 7 | -2.747  | 7.836  | -5.608 | 1.00 | 0.00 |
| ATOM | 108 | HA CYX   | 7 | -2.756  | 7.690  | -4.528 | 1.00 | 0.00 |
| ATOM | 109 | CB CYX   | 7 | -2.388  | 6.476  | -6.294 | 1.00 | 0.00 |
| ATOM | 110 | HB2 CYX  | 7 | -3.004  | 5.682  | -5.872 | 1.00 | 0.00 |
| ATOM | 111 | HB3 CYX  | 7 | -2.574  | 6.549  | -7.366 | 1.00 | 0.00 |

|      |     |     |     |   |        |        |         |      |      |
|------|-----|-----|-----|---|--------|--------|---------|------|------|
| ATOM | 112 | SG  | CYX | 7 | -0.697 | 5.997  | -6.142  | 1.00 | 0.00 |
| ATOM | 113 | C   | CYX | 7 | -1.648 | 8.868  | -5.893  | 1.00 | 0.00 |
| ATOM | 114 | O   | CYX | 7 | -0.852 | 9.209  | -5.030  | 1.00 | 0.00 |
| ATOM | 115 | N   | CYX | 8 | -1.622 | 9.464  | -7.067  | 1.00 | 0.00 |
| ATOM | 116 | H   | CYX | 8 | -2.366 | 9.326  | -7.736  | 1.00 | 0.00 |
| ATOM | 117 | CA  | CYX | 8 | -0.542 | 10.355 | -7.419  | 1.00 | 0.00 |
| ATOM | 118 | HA  | CYX | 8 | 0.405  | 9.862  | -7.203  | 1.00 | 0.00 |
| ATOM | 119 | CB  | CYX | 8 | -0.563 | 10.736 | -8.864  | 1.00 | 0.00 |
| ATOM | 120 | HB2 | CYX | 8 | -1.545 | 11.134 | -9.121  | 1.00 | 0.00 |
| ATOM | 121 | HB3 | CYX | 8 | 0.196  | 11.495 | -9.051  | 1.00 | 0.00 |
| ATOM | 122 | SG  | CYX | 8 | -0.258 | 9.326  | -10.024 | 1.00 | 0.00 |
| ATOM | 123 | C   | CYX | 8 | -0.653 | 11.672 | -6.614  | 1.00 | 0.00 |
| ATOM | 124 | O   | CYX | 8 | 0.311  | 12.186 | -6.214  | 1.00 | 0.00 |
| ATOM | 125 | N   | ARG | 9 | -1.883 | 12.013 | -6.288  | 1.00 | 0.00 |
| ATOM | 126 | H   | ARG | 9 | -2.671 | 11.528 | -6.693  | 1.00 | 0.00 |
| ATOM | 127 | CA  | ARG | 9 | -2.156 | 13.189 | -5.382  | 1.00 | 0.00 |
| ATOM | 128 | HA  | ARG | 9 | -1.567 | 14.038 | -5.730  | 1.00 | 0.00 |
| ATOM | 129 | CB  | ARG | 9 | -3.609 | 13.591 | -5.354  | 1.00 | 0.00 |
| ATOM | 130 | HB2 | ARG | 9 | -3.912 | 13.909 | -6.352  | 1.00 | 0.00 |
| ATOM | 131 | HB3 | ARG | 9 | -4.211 | 12.736 | -5.048  | 1.00 | 0.00 |
| ATOM | 132 | CG  | ARG | 9 | -3.813 | 14.707 | -4.396  | 1.00 | 0.00 |
| ATOM | 133 | HG2 | ARG | 9 | -3.472 | 14.368 | -3.418  | 1.00 | 0.00 |

|      |     |          |    |        |        |        |      |      |
|------|-----|----------|----|--------|--------|--------|------|------|
| ATOM | 134 | HG3 ARG  | 9  | -3.195 | 15.542 | -4.727 | 1.00 | 0.00 |
| ATOM | 135 | CD ARG   | 9  | -5.282 | 15.164 | -4.297 | 1.00 | 0.00 |
| ATOM | 136 | HD2 ARG  | 9  | -5.342 | 15.852 | -3.454 | 1.00 | 0.00 |
| ATOM | 137 | HD3 ARG  | 9  | -5.508 | 15.701 | -5.219 | 1.00 | 0.00 |
| ATOM | 138 | NE ARG   | 9  | -6.277 | 14.110 | -4.113 | 1.00 | 0.00 |
| ATOM | 139 | HE ARG   | 9  | -6.875 | 13.959 | -4.913 | 1.00 | 0.00 |
| ATOM | 140 | CZ ARG   | 9  | -6.473 | 13.357 | -3.011 | 1.00 | 0.00 |
| ATOM | 141 | NH1 ARG  | 9  | -5.737 | 13.494 | -1.896 | 1.00 | 0.00 |
| ATOM | 142 | HH11 ARG | 9  | -5.001 | 14.185 | -1.862 | 1.00 | 0.00 |
| ATOM | 143 | HH12 ARG | 9  | -5.923 | 12.906 | -1.097 | 1.00 | 0.00 |
| ATOM | 144 | NH2 ARG  | 9  | -7.432 | 12.421 | -3.027 | 1.00 | 0.00 |
| ATOM | 145 | HH21 ARG | 9  | -7.993 | 12.291 | -3.857 | 1.00 | 0.00 |
| ATOM | 146 | HH22 ARG | 9  | -7.590 | 11.850 | -2.209 | 1.00 | 0.00 |
| ATOM | 147 | C ARG    | 9  | -1.667 | 12.911 | -3.973 | 1.00 | 0.00 |
| ATOM | 148 | O ARG    | 9  | -0.891 | 13.649 | -3.380 | 1.00 | 0.00 |
| ATOM | 149 | N GLN    | 10 | -1.938 | 11.705 | -3.412 | 1.00 | 0.00 |
| ATOM | 150 | H GLN    | 10 | -2.532 | 11.003 | -3.831 | 1.00 | 0.00 |
| ATOM | 151 | CA GLN   | 10 | -1.391 | 11.446 | -2.103 | 1.00 | 0.00 |
| ATOM | 152 | HA GLN   | 10 | -1.630 | 12.254 | -1.412 | 1.00 | 0.00 |
| ATOM | 153 | CB GLN   | 10 | -2.030 | 10.128 | -1.569 | 1.00 | 0.00 |
| ATOM | 154 | HB2 GLN  | 10 | -1.717 | 9.348  | -2.263 | 1.00 | 0.00 |
| ATOM | 155 | HB3 GLN  | 10 | -1.572 | 9.954  | -0.596 | 1.00 | 0.00 |

|      |     |      |     |    |        |        |        |      |      |
|------|-----|------|-----|----|--------|--------|--------|------|------|
| ATOM | 156 | CG   | GLN | 10 | -3.528 | 10.103 | -1.430 | 1.00 | 0.00 |
| ATOM | 157 | HG2  | GLN | 10 | -3.644 | 10.697 | -0.523 | 1.00 | 0.00 |
| ATOM | 158 | HG3  | GLN | 10 | -4.014 | 10.613 | -2.262 | 1.00 | 0.00 |
| ATOM | 159 | CD   | GLN | 10 | -4.216 | 8.742  | -1.218 | 1.00 | 0.00 |
| ATOM | 160 | OE1  | GLN | 10 | -3.666 | 7.657  | -1.414 | 1.00 | 0.00 |
| ATOM | 161 | NE2  | GLN | 10 | -5.496 | 8.829  | -0.960 | 1.00 | 0.00 |
| ATOM | 162 | HE21 | GLN | 10 | -6.035 | 7.989  | -0.806 | 1.00 | 0.00 |
| ATOM | 163 | HE22 | GLN | 10 | -5.939 | 9.736  | -0.917 | 1.00 | 0.00 |
| ATOM | 164 | C    | GLN | 10 | 0.044  | 11.342 | -2.006 | 1.00 | 0.00 |
| ATOM | 165 | O    | GLN | 10 | 0.722  | 11.842 | -1.159 | 1.00 | 0.00 |
| ATOM | 166 | N    | LEU | 11 | 0.654  | 10.713 | -3.059 | 1.00 | 0.00 |
| ATOM | 167 | H    | LEU | 11 | 0.077  | 10.225 | -3.730 | 1.00 | 0.00 |
| ATOM | 168 | CA   | LEU | 11 | 2.067  | 10.581 | -3.162 | 1.00 | 0.00 |
| ATOM | 169 | HA   | LEU | 11 | 2.482  | 10.262 | -2.206 | 1.00 | 0.00 |
| ATOM | 170 | CB   | LEU | 11 | 2.425  | 9.529  | -4.230 | 1.00 | 0.00 |
| ATOM | 171 | HB2  | LEU | 11 | 1.806  | 8.664  | -3.992 | 1.00 | 0.00 |
| ATOM | 172 | HB3  | LEU | 11 | 2.138  | 9.923  | -5.205 | 1.00 | 0.00 |
| ATOM | 173 | CG   | LEU | 11 | 3.843  | 9.126  | -4.261 | 1.00 | 0.00 |
| ATOM | 174 | HG   | LEU | 11 | 4.434  | 10.028 | -4.421 | 1.00 | 0.00 |
| ATOM | 175 | CD1  | LEU | 11 | 4.307  | 8.435  | -2.990 | 1.00 | 0.00 |
| ATOM | 176 | HD11 | LEU | 11 | 3.716  | 7.533  | -2.830 | 1.00 | 0.00 |
| ATOM | 177 | HD12 | LEU | 11 | 5.359  | 8.168  | -3.085 | 1.00 | 0.00 |

|      |     |      |     |    |        |        |        |      |      |
|------|-----|------|-----|----|--------|--------|--------|------|------|
| ATOM | 178 | HD13 | LEU | 11 | 4.179  | 9.108  | -2.143 | 1.00 | 0.00 |
| ATOM | 179 | CD2  | LEU | 11 | 4.090  | 8.197  | -5.442 | 1.00 | 0.00 |
| ATOM | 180 | HD21 | LEU | 11 | 3.842  | 8.714  | -6.370 | 1.00 | 0.00 |
| ATOM | 181 | HD22 | LEU | 11 | 5.139  | 7.903  | -5.460 | 1.00 | 0.00 |
| ATOM | 182 | HD23 | LEU | 11 | 3.465  | 7.309  | -5.344 | 1.00 | 0.00 |
| ATOM | 183 | C    | LEU | 11 | 2.796  | 11.887 | -3.368 | 1.00 | 0.00 |
| ATOM | 184 | O    | LEU | 11 | 3.864  | 12.097 | -2.874 | 1.00 | 0.00 |
| ATOM | 185 | N    | ARG | 12 | 2.114  | 12.729 | -4.136 | 1.00 | 0.00 |
| ATOM | 186 | H    | ARG | 12 | 1.216  | 12.507 | -4.542 | 1.00 | 0.00 |
| ATOM | 187 | CA   | ARG | 12 | 2.715  | 14.078 | -4.427 | 1.00 | 0.00 |
| ATOM | 188 | HA   | ARG | 12 | 3.706  | 13.954 | -4.862 | 1.00 | 0.00 |
| ATOM | 189 | CB   | ARG | 12 | 1.867  | 14.832 | -5.387 | 1.00 | 0.00 |
| ATOM | 190 | HB2  | ARG | 12 | 1.904  | 14.326 | -6.352 | 1.00 | 0.00 |
| ATOM | 191 | HB3  | ARG | 12 | 0.842  | 14.832 | -5.017 | 1.00 | 0.00 |
| ATOM | 192 | CG   | ARG | 12 | 2.346  | 16.263 | -5.548 | 1.00 | 0.00 |
| ATOM | 193 | HG2  | ARG | 12 | 2.306  | 16.724 | -4.561 | 1.00 | 0.00 |
| ATOM | 194 | HG3  | ARG | 12 | 3.381  | 16.215 | -5.885 | 1.00 | 0.00 |
| ATOM | 195 | CD   | ARG | 12 | 1.540  | 17.087 | -6.520 | 1.00 | 0.00 |
| ATOM | 196 | HD2  | ARG | 12 | 1.981  | 18.084 | -6.530 | 1.00 | 0.00 |
| ATOM | 197 | HD3  | ARG | 12 | 1.662  | 16.627 | -7.501 | 1.00 | 0.00 |
| ATOM | 198 | NE   | ARG | 12 | 0.165  | 17.206 | -6.246 | 1.00 | 0.00 |
| ATOM | 199 | HE   | ARG | 12 | -0.480 | 16.660 | -6.800 | 1.00 | 0.00 |

|      |     |      |     |    |        |        |        |      |      |
|------|-----|------|-----|----|--------|--------|--------|------|------|
| ATOM | 200 | CZ   | ARG | 12 | -0.308 | 17.909 | -5.254 | 1.00 | 0.00 |
| ATOM | 201 | NH1  | ARG | 12 | 0.498  | 18.602 | -4.493 | 1.00 | 0.00 |
| ATOM | 202 | HH11 | ARG | 12 | 1.491  | 18.593 | -4.675 | 1.00 | 0.00 |
| ATOM | 203 | HH12 | ARG | 12 | 0.123  | 19.144 | -3.727 | 1.00 | 0.00 |
| ATOM | 204 | NH2  | ARG | 12 | -1.546 | 18.002 | -5.082 | 1.00 | 0.00 |
| ATOM | 205 | HH21 | ARG | 12 | -2.178 | 17.531 | -5.714 | 1.00 | 0.00 |
| ATOM | 206 | HH22 | ARG | 12 | -1.907 | 18.548 | -4.312 | 1.00 | 0.00 |
| ATOM | 207 | C    | ARG | 12 | 2.818  | 14.834 | -3.104 | 1.00 | 0.00 |
| ATOM | 208 | O    | ARG | 12 | 3.832  | 15.436 | -2.890 | 1.00 | 0.00 |
| ATOM | 209 | N    | ASN | 13 | 1.850  | 14.626 | -2.226 | 1.00 | 0.00 |
| ATOM | 210 | H    | ASN | 13 | 1.001  | 14.164 | -2.519 | 1.00 | 0.00 |
| ATOM | 211 | CA   | ASN | 13 | 1.863  | 15.323 | -0.864 | 1.00 | 0.00 |
| ATOM | 212 | HA   | ASN | 13 | 2.270  | 16.330 | -0.963 | 1.00 | 0.00 |
| ATOM | 213 | CB   | ASN | 13 | 0.487  | 15.420 | -0.334 | 1.00 | 0.00 |
| ATOM | 214 | HB2  | ASN | 13 | -0.062 | 14.481 | -0.407 | 1.00 | 0.00 |
| ATOM | 215 | HB3  | ASN | 13 | 0.608  | 15.689 | 0.715  | 1.00 | 0.00 |
| ATOM | 216 | CG   | ASN | 13 | -0.304 | 16.488 | -1.011 | 1.00 | 0.00 |
| ATOM | 217 | OD1  | ASN | 13 | -0.086 | 17.646 | -0.753 | 1.00 | 0.00 |
| ATOM | 218 | ND2  | ASN | 13 | -1.124 | 16.131 | -1.918 | 1.00 | 0.00 |
| ATOM | 219 | HD21 | ASN | 13 | -1.677 | 16.828 | -2.398 | 1.00 | 0.00 |
| ATOM | 220 | HD22 | ASN | 13 | -1.218 | 15.154 | -2.153 | 1.00 | 0.00 |
| ATOM | 221 | C    | ASN | 13 | 2.900  | 14.821 | 0.110  | 1.00 | 0.00 |

|      |     |      |     |    |       |        |        |      |      |
|------|-----|------|-----|----|-------|--------|--------|------|------|
| ATOM | 222 | O    | ASN | 13 | 3.156 | 15.396 | 1.196  | 1.00 | 0.00 |
| ATOM | 223 | N    | VAL | 14 | 3.482 | 13.631 | -0.174 | 1.00 | 0.00 |
| ATOM | 224 | H    | VAL | 14 | 3.026 | 13.011 | -0.828 | 1.00 | 0.00 |
| ATOM | 225 | CA   | VAL | 14 | 4.615 | 13.181 | 0.475  | 1.00 | 0.00 |
| ATOM | 226 | HA   | VAL | 14 | 4.754 | 13.519 | 1.502  | 1.00 | 0.00 |
| ATOM | 227 | CB   | VAL | 14 | 4.665 | 11.588 | 0.452  | 1.00 | 0.00 |
| ATOM | 228 | HB   | VAL | 14 | 4.589 | 11.235 | -0.576 | 1.00 | 0.00 |
| ATOM | 229 | CG1  | VAL | 14 | 5.993 | 11.115 | 1.059  | 1.00 | 0.00 |
| ATOM | 230 | HG11 | VAL | 14 | 6.069 | 11.468 | 2.087  | 1.00 | 0.00 |
| ATOM | 231 | HG12 | VAL | 14 | 6.031 | 10.026 | 1.045  | 1.00 | 0.00 |
| ATOM | 232 | HG13 | VAL | 14 | 6.822 | 11.515 | 0.476  | 1.00 | 0.00 |
| ATOM | 233 | CG2  | VAL | 14 | 3.445 | 11.052 | 1.067  | 1.00 | 0.00 |
| ATOM | 234 | HG21 | VAL | 14 | 2.574 | 11.397 | 0.508  | 1.00 | 0.00 |
| ATOM | 235 | HG22 | VAL | 14 | 3.478 | 9.963  | 1.052  | 1.00 | 0.00 |
| ATOM | 236 | HG23 | VAL | 14 | 3.375 | 11.399 | 2.098  | 1.00 | 0.00 |
| ATOM | 237 | C    | VAL | 14 | 5.924 | 13.804 | -0.092 | 1.00 | 0.00 |
| ATOM | 238 | O    | VAL | 14 | 6.090 | 13.928 | -1.308 | 1.00 | 0.00 |
| ATOM | 239 | N    | SER | 15 | 6.869 | 14.187 | 0.778  | 1.00 | 0.00 |
| ATOM | 240 | H    | SER | 15 | 6.763 | 14.010 | 1.766  | 1.00 | 0.00 |
| ATOM | 241 | CA   | SER | 15 | 8.115 | 14.789 | 0.312  | 1.00 | 0.00 |
| ATOM | 242 | HA   | SER | 15 | 7.895 | 15.721 | -0.210 | 1.00 | 0.00 |
| ATOM | 243 | CB   | SER | 15 | 9.040 | 15.089 | 1.467  | 1.00 | 0.00 |



|      |     |     |     |    |        |        |        |      |      |
|------|-----|-----|-----|----|--------|--------|--------|------|------|
| ATOM | 244 | HB2 | SER | 15 | 9.286  | 14.203 | 2.052  | 1.00 | 0.00 |
| ATOM | 245 | HB3 | SER | 15 | 9.959  | 15.584 | 1.154  | 1.00 | 0.00 |
| ATOM | 246 | OG  | SER | 15 | 8.285  | 15.962 | 2.244  | 1.00 | 0.00 |
| ATOM | 247 | HG  | SER | 15 | 8.790  | 16.220 | 3.018  | 1.00 | 0.00 |
| ATOM | 248 | C   | SER | 15 | 8.874  | 13.874 | -0.526 | 1.00 | 0.00 |
| ATOM | 249 | O   | SER | 15 | 8.880  | 12.648 | -0.233 | 1.00 | 0.00 |
| ATOM | 250 | N   | PRO | 16 | 9.506  | 14.357 | -1.590 | 1.00 | 0.00 |
| ATOM | 251 | CD  | PRO | 16 | 9.447  | 15.760 | -2.169 | 1.00 | 0.00 |
| ATOM | 252 | HD2 | PRO | 16 | 9.909  | 16.461 | -1.474 | 1.00 | 0.00 |
| ATOM | 253 | HD3 | PRO | 16 | 8.407  | 16.044 | -2.332 | 1.00 | 0.00 |
| ATOM | 254 | CG  | PRO | 16 | 10.221 | 15.631 | -3.466 | 1.00 | 0.00 |
| ATOM | 255 | HG2 | PRO | 16 | 10.791 | 16.544 | -3.637 | 1.00 | 0.00 |
| ATOM | 256 | HG3 | PRO | 16 | 9.521  | 15.482 | -4.289 | 1.00 | 0.00 |
| ATOM | 257 | CB  | PRO | 16 | 11.109 | 14.462 | -3.310 | 1.00 | 0.00 |
| ATOM | 258 | HB2 | PRO | 16 | 12.027 | 14.696 | -2.772 | 1.00 | 0.00 |
| ATOM | 259 | HB3 | PRO | 16 | 11.356 | 14.023 | -4.277 | 1.00 | 0.00 |
| ATOM | 260 | CA  | PRO | 16 | 10.254 | 13.475 | -2.486 | 1.00 | 0.00 |
| ATOM | 261 | HA  | PRO | 16 | 9.525  | 12.994 | -3.138 | 1.00 | 0.00 |
| ATOM | 262 | C   | PRO | 16 | 11.088 | 12.405 | -1.776 | 1.00 | 0.00 |
| ATOM | 263 | O   | PRO | 16 | 11.032 | 11.202 | -2.100 | 1.00 | 0.00 |
| ATOM | 264 | N   | PHE | 17 | 11.838 | 12.807 | -0.761 | 1.00 | 0.00 |
| ATOM | 265 | H   | PHE | 17 | 11.862 | 13.777 | -0.479 | 1.00 | 0.00 |

|      |     |     |     |    |        |        |        |      |      |
|------|-----|-----|-----|----|--------|--------|--------|------|------|
| ATOM | 266 | CA  | PHE | 17 | 12.735 | 11.857 | -0.078 | 1.00 | 0.00 |
| ATOM | 267 | HA  | PHE | 17 | 13.304 | 11.301 | -0.823 | 1.00 | 0.00 |
| ATOM | 268 | CB  | PHE | 17 | 13.724 | 12.585 | 0.856  | 1.00 | 0.00 |
| ATOM | 269 | HB2 | PHE | 17 | 14.519 | 13.011 | 0.244  | 1.00 | 0.00 |
| ATOM | 270 | HB3 | PHE | 17 | 13.236 | 13.380 | 1.421  | 1.00 | 0.00 |
| ATOM | 271 | CG  | PHE | 17 | 14.401 | 11.671 | 1.880  | 1.00 | 0.00 |
| ATOM | 272 | CD1 | PHE | 17 | 15.382 | 10.739 | 1.475  | 1.00 | 0.00 |
| ATOM | 273 | HD1 | PHE | 17 | 15.678 | 10.693 | 0.427  | 1.00 | 0.00 |
| ATOM | 274 | CE1 | PHE | 17 | 15.974 | 9.877  | 2.410  | 1.00 | 0.00 |
| ATOM | 275 | HE1 | PHE | 17 | 16.731 | 9.162  | 2.089  | 1.00 | 0.00 |
| ATOM | 276 | CZ  | PHE | 17 | 15.591 | 9.935  | 3.758  | 1.00 | 0.00 |
| ATOM | 277 | HZ  | PHE | 17 | 16.057 | 9.265  | 4.480  | 1.00 | 0.00 |
| ATOM | 278 | CE2 | PHE | 17 | 14.619 | 10.845 | 4.177  | 1.00 | 0.00 |
| ATOM | 279 | HE2 | PHE | 17 | 14.321 | 10.887 | 5.225  | 1.00 | 0.00 |
| ATOM | 280 | CD2 | PHE | 17 | 14.027 | 11.704 | 3.248  | 1.00 | 0.00 |
| ATOM | 281 | HD2 | PHE | 17 | 13.265 | 12.414 | 3.570  | 1.00 | 0.00 |
| ATOM | 282 | C   | PHE | 17 | 11.965 | 10.778 | 0.702  | 1.00 | 0.00 |
| ATOM | 283 | O   | PHE | 17 | 12.542 | 9.735  | 1.011  | 1.00 | 0.00 |
| ATOM | 284 | N   | CYX | 18 | 10.708 | 11.040 | 1.027  | 1.00 | 0.00 |
| ATOM | 285 | H   | CYX | 18 | 10.302 | 11.905 | 0.699  | 1.00 | 0.00 |
| ATOM | 286 | CA  | CYX | 18 | 9.887  | 10.154 | 1.804  | 1.00 | 0.00 |
| ATOM | 287 | HA  | CYX | 18 | 10.541 | 9.510  | 2.391  | 1.00 | 0.00 |

|      |     |     |     |    |        |        |        |      |      |
|------|-----|-----|-----|----|--------|--------|--------|------|------|
| ATOM | 288 | CB  | CYX | 18 | 8.964  | 10.855 | 2.724  | 1.00 | 0.00 |
| ATOM | 289 | HB2 | CYX | 18 | 8.456  | 11.657 | 2.188  | 1.00 | 0.00 |
| ATOM | 290 | HB3 | CYX | 18 | 8.226  | 10.150 | 3.106  | 1.00 | 0.00 |
| ATOM | 291 | SG  | CYX | 18 | 10.012 | 11.570 | 4.109  | 1.00 | 0.00 |
| ATOM | 292 | C   | CYX | 18 | 8.989  | 9.282  | 0.850  | 1.00 | 0.00 |
| ATOM | 293 | O   | CYX | 18 | 8.263  | 8.458  | 1.412  | 1.00 | 0.00 |
| ATOM | 294 | N   | ARG | 19 | 9.031  | 9.466  | -0.486 | 1.00 | 0.00 |
| ATOM | 295 | H   | ARG | 19 | 9.729  | 10.032 | -0.946 | 1.00 | 0.00 |
| ATOM | 296 | CA  | ARG | 19 | 8.011  | 8.830  | -1.304 | 1.00 | 0.00 |
| ATOM | 297 | HA  | ARG | 19 | 7.042  | 8.999  | -0.834 | 1.00 | 0.00 |
| ATOM | 298 | CB  | ARG | 19 | 7.958  | 9.351  | -2.710 | 1.00 | 0.00 |
| ATOM | 299 | HB2 | ARG | 19 | 8.969  | 9.453  | -3.105 | 1.00 | 0.00 |
| ATOM | 300 | HB3 | ARG | 19 | 7.390  | 8.664  | -3.338 | 1.00 | 0.00 |
| ATOM | 301 | CG  | ARG | 19 | 7.271  | 10.724 | -2.705 | 1.00 | 0.00 |
| ATOM | 302 | HG2 | ARG | 19 | 6.234  | 10.553 | -2.414 | 1.00 | 0.00 |
| ATOM | 303 | HG3 | ARG | 19 | 7.769  | 11.319 | -1.940 | 1.00 | 0.00 |
| ATOM | 304 | CD  | ARG | 19 | 7.307  | 11.454 | -4.002 | 1.00 | 0.00 |
| ATOM | 305 | HD2 | ARG | 19 | 8.340  | 11.581 | -4.325 | 1.00 | 0.00 |
| ATOM | 306 | HD3 | ARG | 19 | 6.757  | 10.892 | -4.757 | 1.00 | 0.00 |
| ATOM | 307 | NE  | ARG | 19 | 6.698  | 12.765 | -3.864 | 1.00 | 0.00 |
| ATOM | 308 | HE  | ARG | 19 | 6.003  | 12.849 | -3.136 | 1.00 | 0.00 |
| ATOM | 309 | CZ  | ARG | 19 | 7.006  | 13.837 | -4.565 | 1.00 | 0.00 |

|      |     |      |     |    |        |        |        |      |      |
|------|-----|------|-----|----|--------|--------|--------|------|------|
| ATOM | 310 | NH1  | ARG | 19 | 7.954  | 13.807 | -5.489 | 1.00 | 0.00 |
| ATOM | 311 | HH11 | ARG | 19 | 8.455  | 12.949 | -5.666 | 1.00 | 0.00 |
| ATOM | 312 | HH12 | ARG | 19 | 8.171  | 14.643 | -6.013 | 1.00 | 0.00 |
| ATOM | 313 | NH2  | ARG | 19 | 6.296  | 14.969 | -4.361 | 1.00 | 0.00 |
| ATOM | 314 | HH21 | ARG | 19 | 5.548  | 14.977 | -3.682 | 1.00 | 0.00 |
| ATOM | 315 | HH22 | ARG | 19 | 6.516  | 15.802 | -4.889 | 1.00 | 0.00 |
| ATOM | 316 | C    | ARG | 19 | 8.305  | 7.308  | -1.352 | 1.00 | 0.00 |
| ATOM | 317 | O    | ARG | 19 | 7.395  | 6.559  | -1.164 | 1.00 | 0.00 |
| ATOM | 318 | N    | CYX | 20 | 9.573  | 6.993  | -1.522 | 1.00 | 0.00 |
| ATOM | 319 | H    | CYX | 20 | 10.273 | 7.686  | -1.746 | 1.00 | 0.00 |
| ATOM | 320 | CA   | CYX | 20 | 9.953  | 5.518  | -1.632 | 1.00 | 0.00 |
| ATOM | 321 | HA   | CYX | 20 | 9.207  | 5.024  | -2.256 | 1.00 | 0.00 |
| ATOM | 322 | CB   | CYX | 20 | 11.317 | 5.277  | -2.229 | 1.00 | 0.00 |
| ATOM | 323 | HB2  | CYX | 20 | 12.066 | 5.826  | -1.658 | 1.00 | 0.00 |
| ATOM | 324 | HB3  | CYX | 20 | 11.545 | 4.212  | -2.198 | 1.00 | 0.00 |
| ATOM | 325 | SG   | CYX | 20 | 11.335 | 5.644  | -3.991 | 1.00 | 0.00 |
| ATOM | 326 | C    | CYX | 20 | 9.707  | 4.808  | -0.315 | 1.00 | 0.00 |
| ATOM | 327 | O    | CYX | 20 | 9.052  | 3.760  | -0.293 | 1.00 | 0.00 |
| ATOM | 328 | N    | PRO | 21 | 10.143 | 5.363  | 0.816  | 1.00 | 0.00 |
| ATOM | 329 | CD   | PRO | 21 | 11.232 | 6.340  | 0.983  | 1.00 | 0.00 |
| ATOM | 330 | HD2  | PRO | 21 | 10.907 | 7.312  | 0.609  | 1.00 | 0.00 |
| ATOM | 331 | HD3  | PRO | 21 | 12.105 | 6.009  | 0.421  | 1.00 | 0.00 |

|      |     |     |     |    |        |       |        |      |      |
|------|-----|-----|-----|----|--------|-------|--------|------|------|
| ATOM | 332 | CG  | PRO | 21 | 11.468 | 6.343 | 2.441  | 1.00 | 0.00 |
| ATOM | 333 | HG2 | PRO | 21 | 11.692 | 7.367 | 2.741  | 1.00 | 0.00 |
| ATOM | 334 | HG3 | PRO | 21 | 12.331 | 5.709 | 2.641  | 1.00 | 0.00 |
| ATOM | 335 | CB  | PRO | 21 | 10.318 | 5.853 | 3.099  | 1.00 | 0.00 |
| ATOM | 336 | HB2 | PRO | 21 | 9.587  | 6.638 | 3.294  | 1.00 | 0.00 |
| ATOM | 337 | HB3 | PRO | 21 | 10.574 | 5.355 | 4.034  | 1.00 | 0.00 |
| ATOM | 338 | CA  | PRO | 21 | 9.735  | 4.830 | 2.100  | 1.00 | 0.00 |
| ATOM | 339 | HA  | PRO | 21 | 10.207 | 3.852 | 2.192  | 1.00 | 0.00 |
| ATOM | 340 | C   | PRO | 21 | 8.255  | 4.691 | 2.298  | 1.00 | 0.00 |
| ATOM | 341 | O   | PRO | 21 | 7.771  | 3.655 | 2.836  | 1.00 | 0.00 |
| ATOM | 342 | N   | SER | 22 | 7.442  | 5.658 | 1.834  | 1.00 | 0.00 |
| ATOM | 343 | H   | SER | 22 | 7.827  | 6.466 | 1.365  | 1.00 | 0.00 |
| ATOM | 344 | CA  | SER | 22 | 6.077  | 5.617 | 2.056  | 1.00 | 0.00 |
| ATOM | 345 | HA  | SER | 22 | 5.892  | 5.333 | 3.092  | 1.00 | 0.00 |
| ATOM | 346 | CB  | SER | 22 | 5.413  | 6.978 | 1.794  | 1.00 | 0.00 |
| ATOM | 347 | HB2 | SER | 22 | 5.695  | 7.380 | 0.820  | 1.00 | 0.00 |
| ATOM | 348 | HB3 | SER | 22 | 4.327  | 6.912 | 1.858  | 1.00 | 0.00 |
| ATOM | 349 | OG  | SER | 22 | 5.888  | 7.822 | 2.801  | 1.00 | 0.00 |
| ATOM | 350 | HG  | SER | 22 | 5.506  | 8.697 | 2.692  | 1.00 | 0.00 |
| ATOM | 351 | C   | SER | 22 | 5.373  | 4.494 | 1.190  | 1.00 | 0.00 |
| ATOM | 352 | O   | SER | 22 | 4.436  | 3.926 | 1.635  | 1.00 | 0.00 |
| ATOM | 353 | N   | LEU | 23 | 5.889  | 4.361 | -0.008 | 1.00 | 0.00 |

|      |     |      |     |    |       |        |        |      |      |
|------|-----|------|-----|----|-------|--------|--------|------|------|
| ATOM | 354 | H    | LEU | 23 | 6.630 | 4.985  | -0.296 | 1.00 | 0.00 |
| ATOM | 355 | CA   | LEU | 23 | 5.407 | 3.355  | -0.974 | 1.00 | 0.00 |
| ATOM | 356 | HA   | LEU | 23 | 4.328 | 3.478  | -1.069 | 1.00 | 0.00 |
| ATOM | 357 | CB   | LEU | 23 | 6.023 | 3.451  | -2.340 | 1.00 | 0.00 |
| ATOM | 358 | HB2  | LEU | 23 | 7.030 | 3.829  | -2.166 | 1.00 | 0.00 |
| ATOM | 359 | HB3  | LEU | 23 | 6.077 | 2.518  | -2.900 | 1.00 | 0.00 |
| ATOM | 360 | CG   | LEU | 23 | 5.218 | 4.488  | -3.148 | 1.00 | 0.00 |
| ATOM | 361 | HG   | LEU | 23 | 5.069 | 5.401  | -2.571 | 1.00 | 0.00 |
| ATOM | 362 | CD1  | LEU | 23 | 6.017 | 4.795  | -4.361 | 1.00 | 0.00 |
| ATOM | 363 | HD11 | LEU | 23 | 6.165 | 3.883  | -4.939 | 1.00 | 0.00 |
| ATOM | 364 | HD12 | LEU | 23 | 5.487 | 5.528  | -4.970 | 1.00 | 0.00 |
| ATOM | 365 | HD13 | LEU | 23 | 6.985 | 5.200  | -4.066 | 1.00 | 0.00 |
| ATOM | 366 | CD2  | LEU | 23 | 3.838 | 4.057  | -3.421 | 1.00 | 0.00 |
| ATOM | 367 | HD21 | LEU | 23 | 3.315 | 3.893  | -2.479 | 1.00 | 0.00 |
| ATOM | 368 | HD22 | LEU | 23 | 3.322 | 4.829  | -3.993 | 1.00 | 0.00 |
| ATOM | 369 | HD23 | LEU | 23 | 3.853 | 3.130  | -3.994 | 1.00 | 0.00 |
| ATOM | 370 | C    | LEU | 23 | 5.739 | 1.991  | -0.312 | 1.00 | 0.00 |
| ATOM | 371 | O    | LEU | 23 | 4.915 | 1.099  | -0.493 | 1.00 | 0.00 |
| ATOM | 372 | N    | ARG | 24 | 6.900 | 1.830  | 0.252  | 1.00 | 0.00 |
| ATOM | 373 | H    | ARG | 24 | 7.592 | 2.565  | 0.279  | 1.00 | 0.00 |
| ATOM | 374 | CA   | ARG | 24 | 7.202 | 0.531  | 0.971  | 1.00 | 0.00 |
| ATOM | 375 | HA   | ARG | 24 | 7.243 | -0.289 | 0.255  | 1.00 | 0.00 |

|      |     |      |     |    |        |        |       |      |      |
|------|-----|------|-----|----|--------|--------|-------|------|------|
| ATOM | 376 | CB   | ARG | 24 | 8.518  | 0.623  | 1.668 | 1.00 | 0.00 |
| ATOM | 377 | HB2  | ARG | 24 | 9.295  | 0.748  | 0.914 | 1.00 | 0.00 |
| ATOM | 378 | HB3  | ARG | 24 | 8.500  | 1.498  | 2.318 | 1.00 | 0.00 |
| ATOM | 379 | CG   | ARG | 24 | 8.812  | -0.631 | 2.505 | 1.00 | 0.00 |
| ATOM | 380 | HG2  | ARG | 24 | 8.048  | -0.725 | 3.276 | 1.00 | 0.00 |
| ATOM | 381 | HG3  | ARG | 24 | 8.779  | -1.504 | 1.853 | 1.00 | 0.00 |
| ATOM | 382 | CD   | ARG | 24 | 10.181 | -0.538 | 3.157 | 1.00 | 0.00 |
| ATOM | 383 | HD2  | ARG | 24 | 10.167 | 0.325  | 3.823 | 1.00 | 0.00 |
| ATOM | 384 | HD3  | ARG | 24 | 10.326 | -1.446 | 3.742 | 1.00 | 0.00 |
| ATOM | 385 | NE   | ARG | 24 | 11.300 | -0.395 | 2.230 | 1.00 | 0.00 |
| ATOM | 386 | HE   | ARG | 24 | 11.578 | 0.550  | 2.004 | 1.00 | 0.00 |
| ATOM | 387 | CZ   | ARG | 24 | 11.987 | -1.411 | 1.688 | 1.00 | 0.00 |
| ATOM | 388 | NH1  | ARG | 24 | 11.648 | -2.702 | 1.895 | 1.00 | 0.00 |
| ATOM | 389 | HH11 | ARG | 24 | 10.852 | -2.925 | 2.475 | 1.00 | 0.00 |
| ATOM | 390 | HH12 | ARG | 24 | 12.191 | -3.438 | 1.468 | 1.00 | 0.00 |
| ATOM | 391 | NH2  | ARG | 24 | 13.026 | -1.124 | 0.895 | 1.00 | 0.00 |
| ATOM | 392 | HH21 | ARG | 24 | 13.272 | -0.160 | 0.720 | 1.00 | 0.00 |
| ATOM | 393 | HH22 | ARG | 24 | 13.558 | -1.872 | 0.475 | 1.00 | 0.00 |
| ATOM | 394 | C    | ARG | 24 | 6.147  | 0.307  | 2.072 | 1.00 | 0.00 |
| ATOM | 395 | O    | ARG | 24 | 5.575  | -0.830 | 2.243 | 1.00 | 0.00 |
| ATOM | 396 | N    | GLN | 25 | 5.841  | 1.331  | 2.868 | 1.00 | 0.00 |
| ATOM | 397 | H    | GLN | 25 | 6.361  | 2.197  | 2.860 | 1.00 | 0.00 |

|      |     |      |     |    |       |       |        |      |      |
|------|-----|------|-----|----|-------|-------|--------|------|------|
| ATOM | 398 | CA   | GLN | 25 | 4.752 | 1.175 | 3.862  | 1.00 | 0.00 |
| ATOM | 399 | HA   | GLN | 25 | 4.953 | 0.310 | 4.494  | 1.00 | 0.00 |
| ATOM | 400 | CB   | GLN | 25 | 4.644 | 2.435 | 4.765  | 1.00 | 0.00 |
| ATOM | 401 | HB2  | GLN | 25 | 4.426 | 3.298 | 4.135  | 1.00 | 0.00 |
| ATOM | 402 | HB3  | GLN | 25 | 3.828 | 2.288 | 5.472  | 1.00 | 0.00 |
| ATOM | 403 | CG   | GLN | 25 | 5.947 | 2.680 | 5.533  | 1.00 | 0.00 |
| ATOM | 404 | HG2  | GLN | 25 | 6.349 | 1.710 | 5.825  | 1.00 | 0.00 |
| ATOM | 405 | HG3  | GLN | 25 | 6.665 | 3.193 | 4.892  | 1.00 | 0.00 |
| ATOM | 406 | CD   | GLN | 25 | 5.731 | 3.519 | 6.794  | 1.00 | 0.00 |
| ATOM | 407 | OE1  | GLN | 25 | 5.592 | 4.765 | 6.746  | 1.00 | 0.00 |
| ATOM | 408 | NE2  | GLN | 25 | 5.729 | 2.840 | 7.943  | 1.00 | 0.00 |
| ATOM | 409 | HE21 | GLN | 25 | 5.591 | 3.330 | 8.815  | 1.00 | 0.00 |
| ATOM | 410 | HE22 | GLN | 25 | 5.864 | 1.840 | 7.935  | 1.00 | 0.00 |
| ATOM | 411 | C    | GLN | 25 | 3.391 | 0.884 | 3.296  | 1.00 | 0.00 |
| ATOM | 412 | O    | GLN | 25 | 2.583 | 0.117 | 3.814  | 1.00 | 0.00 |
| ATOM | 413 | N    | ALA | 26 | 3.070 | 1.414 | 2.068  | 1.00 | 0.00 |
| ATOM | 414 | H    | ALA | 26 | 3.702 | 2.060 | 1.616  | 1.00 | 0.00 |
| ATOM | 415 | CA   | ALA | 26 | 1.869 | 1.087 | 1.411  | 1.00 | 0.00 |
| ATOM | 416 | HA   | ALA | 26 | 1.041 | 1.316 | 2.082  | 1.00 | 0.00 |
| ATOM | 417 | CB   | ALA | 26 | 1.736 | 1.938 | 0.174  | 1.00 | 0.00 |
| ATOM | 418 | HB1  | ALA | 26 | 2.553 | 1.714 | -0.512 | 1.00 | 0.00 |
| ATOM | 419 | HB2  | ALA | 26 | 0.784 | 1.725 | -0.314 | 1.00 | 0.00 |



|      |     |      |     |    |       |        |        |      |      |
|------|-----|------|-----|----|-------|--------|--------|------|------|
| ATOM | 420 | HB3  | ALA | 26 | 1.774 | 2.992  | 0.451  | 1.00 | 0.00 |
| ATOM | 421 | C    | ALA | 26 | 1.757 | -0.417 | 0.957  | 1.00 | 0.00 |
| ATOM | 422 | O    | ALA | 26 | 0.629 | -0.899 | 0.984  | 1.00 | 0.00 |
| ATOM | 423 | N    | VAL | 27 | 2.856 | -0.913 | 0.509  | 1.00 | 0.00 |
| ATOM | 424 | H    | VAL | 27 | 3.672 | -0.321 | 0.443  | 1.00 | 0.00 |
| ATOM | 425 | CA   | VAL | 27 | 2.976 | -2.375 | 0.049  | 1.00 | 0.00 |
| ATOM | 426 | HA   | VAL | 27 | 2.201 | -2.504 | -0.707 | 1.00 | 0.00 |
| ATOM | 427 | CB   | VAL | 27 | 4.282 | -2.781 | -0.535 | 1.00 | 0.00 |
| ATOM | 428 | HB   | VAL | 27 | 5.085 | -2.522 | 0.154  | 1.00 | 0.00 |
| ATOM | 429 | CG1  | VAL | 27 | 4.284 | -4.299 | -0.777 | 1.00 | 0.00 |
| ATOM | 430 | HG11 | VAL | 27 | 3.481 | -4.558 | -1.467 | 1.00 | 0.00 |
| ATOM | 431 | HG12 | VAL | 27 | 5.240 | -4.598 | -1.205 | 1.00 | 0.00 |
| ATOM | 432 | HG13 | VAL | 27 | 4.131 | -4.818 | 0.169  | 1.00 | 0.00 |
| ATOM | 433 | CG2  | VAL | 27 | 4.561 | -2.120 | -1.913 | 1.00 | 0.00 |
| ATOM | 434 | HG21 | VAL | 27 | 4.571 | -1.035 | -1.801 | 1.00 | 0.00 |
| ATOM | 435 | HG22 | VAL | 27 | 5.528 | -2.455 | -2.288 | 1.00 | 0.00 |
| ATOM | 436 | HG23 | VAL | 27 | 3.780 | -2.405 | -2.618 | 1.00 | 0.00 |
| ATOM | 437 | C    | VAL | 27 | 2.703 | -3.201 | 1.324  | 1.00 | 0.00 |
| ATOM | 438 | O    | VAL | 27 | 1.802 | -4.075 | 1.288  | 1.00 | 0.00 |
| ATOM | 439 | N    | GLN | 28 | 3.335 | -2.840 | 2.443  | 1.00 | 0.00 |
| ATOM | 440 | H    | GLN | 28 | 4.039 | -2.116 | 2.437  | 1.00 | 0.00 |
| ATOM | 441 | CA   | GLN | 28 | 3.099 | -3.577 | 3.701  | 1.00 | 0.00 |

|      |     |      |     |    |        |        |       |      |      |
|------|-----|------|-----|----|--------|--------|-------|------|------|
| ATOM | 442 | HA   | GLN | 28 | 3.293  | -4.640 | 3.563 | 1.00 | 0.00 |
| ATOM | 443 | CB   | GLN | 28 | 4.026  | -3.054 | 4.752 | 1.00 | 0.00 |
| ATOM | 444 | HB2  | GLN | 28 | 3.903  | -1.971 | 4.790 | 1.00 | 0.00 |
| ATOM | 445 | HB3  | GLN | 28 | 3.721  | -3.487 | 5.705 | 1.00 | 0.00 |
| ATOM | 446 | CG   | GLN | 28 | 5.420  | -3.375 | 4.498 | 1.00 | 0.00 |
| ATOM | 447 | HG2  | GLN | 28 | 5.584  | -4.427 | 4.730 | 1.00 | 0.00 |
| ATOM | 448 | HG3  | GLN | 28 | 5.671  | -3.190 | 3.453 | 1.00 | 0.00 |
| ATOM | 449 | CD   | GLN | 28 | 6.342  | -2.530 | 5.379 | 1.00 | 0.00 |
| ATOM | 450 | OE1  | GLN | 28 | 5.877  | -1.748 | 6.192 | 1.00 | 0.00 |
| ATOM | 451 | NE2  | GLN | 28 | 7.637  | -2.676 | 5.196 | 1.00 | 0.00 |
| ATOM | 452 | HE21 | GLN | 28 | 8.286  | -2.140 | 5.753 | 1.00 | 0.00 |
| ATOM | 453 | HE22 | GLN | 28 | 7.975  | -3.323 | 4.498 | 1.00 | 0.00 |
| ATOM | 454 | C    | GLN | 28 | 1.674  | -3.498 | 4.082 | 1.00 | 0.00 |
| ATOM | 455 | O    | GLN | 28 | 1.030  | -4.478 | 4.529 | 1.00 | 0.00 |
| ATOM | 456 | N    | SER | 29 | 1.076  | -2.290 | 4.079 | 1.00 | 0.00 |
| ATOM | 457 | H    | SER | 29 | 1.609  | -1.456 | 3.878 | 1.00 | 0.00 |
| ATOM | 458 | CA   | SER | 29 | -0.306 | -2.146 | 4.411 | 1.00 | 0.00 |
| ATOM | 459 | HA   | SER | 29 | -0.515 | -2.577 | 5.390 | 1.00 | 0.00 |
| ATOM | 460 | CB   | SER | 29 | -0.641 | -0.667 | 4.451 | 1.00 | 0.00 |
| ATOM | 461 | HB2  | SER | 29 | -0.435 | -0.206 | 3.485 | 1.00 | 0.00 |
| ATOM | 462 | HB3  | SER | 29 | -1.692 | -0.523 | 4.705 | 1.00 | 0.00 |
| ATOM | 463 | OG   | SER | 29 | 0.160  | -0.074 | 5.430 | 1.00 | 0.00 |

|      |     |     |     |    |        |        |        |      |      |
|------|-----|-----|-----|----|--------|--------|--------|------|------|
| ATOM | 464 | HG  | SER | 29 | -0.033 | 0.866  | 5.475  | 1.00 | 0.00 |
| ATOM | 465 | C   | SER | 29 | -1.316 | -2.815 | 3.526  | 1.00 | 0.00 |
| ATOM | 466 | O   | SER | 29 | -2.406 | -3.261 | 3.959  | 1.00 | 0.00 |
| ATOM | 467 | N   | ALA | 30 | -1.007 | -2.835 | 2.221  | 1.00 | 0.00 |
| ATOM | 468 | H   | ALA | 30 | -0.221 | -2.312 | 1.863  | 1.00 | 0.00 |
| ATOM | 469 | CA  | ALA | 30 | -1.845 | -3.524 | 1.287  | 1.00 | 0.00 |
| ATOM | 470 | HA  | ALA | 30 | -2.855 | -3.132 | 1.410  | 1.00 | 0.00 |
| ATOM | 471 | CB  | ALA | 30 | -1.390 | -3.252 | -0.130 | 1.00 | 0.00 |
| ATOM | 472 | HB1 | ALA | 30 | -0.384 | -3.647 | -0.271 | 1.00 | 0.00 |
| ATOM | 473 | HB2 | ALA | 30 | -2.072 | -3.735 | -0.830 | 1.00 | 0.00 |
| ATOM | 474 | HB3 | ALA | 30 | -1.387 | -2.177 | -0.311 | 1.00 | 0.00 |
| ATOM | 475 | C   | ALA | 30 | -1.908 | -5.028 | 1.562  | 1.00 | 0.00 |
| ATOM | 476 | O   | ALA | 30 | -2.905 | -5.627 | 1.344  | 1.00 | 0.00 |
| ATOM | 477 | N   | GLN | 31 | -0.850 | -5.566 | 2.055  | 1.00 | 0.00 |
| ATOM | 478 | H   | GLN | 31 | -0.008 | -5.024 | 2.185  | 1.00 | 0.00 |
| ATOM | 479 | CA  | GLN | 31 | -0.835 | -7.023 | 2.456  | 1.00 | 0.00 |
| ATOM | 480 | HA  | GLN | 31 | -1.079 | -7.650 | 1.598  | 1.00 | 0.00 |
| ATOM | 481 | CB  | GLN | 31 | 0.497  | -7.392 | 2.943  | 1.00 | 0.00 |
| ATOM | 482 | HB2 | GLN | 31 | 0.761  | -6.729 | 3.767  | 1.00 | 0.00 |
| ATOM | 483 | HB3 | GLN | 31 | 0.463  | -8.421 | 3.301  | 1.00 | 0.00 |
| ATOM | 484 | CG  | GLN | 31 | 1.508  | -7.276 | 1.875  | 1.00 | 0.00 |
| ATOM | 485 | HG2 | GLN | 31 | 1.179  | -7.925 | 1.063  | 1.00 | 0.00 |

|      |     |      |     |    |        |        |        |      |      |
|------|-----|------|-----|----|--------|--------|--------|------|------|
| ATOM | 486 | HG3  | GLN | 31 | 1.542  | -6.244 | 1.523  | 1.00 | 0.00 |
| ATOM | 487 | CD   | GLN | 31 | 2.876  | -7.684 | 2.284  | 1.00 | 0.00 |
| ATOM | 488 | OE1  | GLN | 31 | 3.834  | -6.943 | 2.184  | 1.00 | 0.00 |
| ATOM | 489 | NE2  | GLN | 31 | 2.975  | -8.914 | 2.727  | 1.00 | 0.00 |
| ATOM | 490 | HE21 | GLN | 31 | 3.872  | -9.269 | 3.025  | 1.00 | 0.00 |
| ATOM | 491 | HE22 | GLN | 31 | 2.153  | -9.500 | 2.768  | 1.00 | 0.00 |
| ATOM | 492 | C    | GLN | 31 | -1.824 | -7.337 | 3.554  | 1.00 | 0.00 |
| ATOM | 493 | O    | GLN | 31 | -2.356 | -8.419 | 3.586  | 1.00 | 0.00 |
| ATOM | 494 | N    | GLN | 32 | -2.113 | -6.390 | 4.429  | 1.00 | 0.00 |
| ATOM | 495 | H    | GLN | 32 | -1.634 | -5.501 | 4.395  | 1.00 | 0.00 |
| ATOM | 496 | CA   | GLN | 32 | -3.095 | -6.599 | 5.467  | 1.00 | 0.00 |
| ATOM | 497 | HA   | GLN | 32 | -2.887 | -7.530 | 5.994  | 1.00 | 0.00 |
| ATOM | 498 | CB   | GLN | 32 | -3.051 | -5.443 | 6.476  | 1.00 | 0.00 |
| ATOM | 499 | HB2  | GLN | 32 | -3.184 | -4.508 | 5.931  | 1.00 | 0.00 |
| ATOM | 500 | HB3  | GLN | 32 | -3.873 | -5.572 | 7.180  | 1.00 | 0.00 |
| ATOM | 501 | CG   | GLN | 32 | -1.746 | -5.404 | 7.229  | 1.00 | 0.00 |
| ATOM | 502 | HG2  | GLN | 32 | -1.220 | -6.355 | 7.155  | 1.00 | 0.00 |
| ATOM | 503 | HG3  | GLN | 32 | -1.125 | -4.612 | 6.810  | 1.00 | 0.00 |
| ATOM | 504 | CD   | GLN | 32 | -1.994 | -5.103 | 8.681  | 1.00 | 0.00 |
| ATOM | 505 | OE1  | GLN | 32 | -2.341 | -3.978 | 9.044  | 1.00 | 0.00 |
| ATOM | 506 | NE2  | GLN | 32 | -1.849 | -6.114 | 9.516  | 1.00 | 0.00 |
| ATOM | 507 | HE21 | GLN | 32 | -2.002 | -5.974 | 10.504 | 1.00 | 0.00 |

|      |     |      |     |    |        |        |       |      |      |
|------|-----|------|-----|----|--------|--------|-------|------|------|
| ATOM | 508 | HE22 | GLN | 32 | -1.586 | -7.023 | 9.163 | 1.00 | 0.00 |
| ATOM | 509 | C    | GLN | 32 | -4.505 | -6.712 | 4.991 | 1.00 | 0.00 |
| ATOM | 510 | O    | GLN | 32 | -5.337 | -7.373 | 5.636 | 1.00 | 0.00 |
| ATOM | 511 | N    | GLN | 33 | -4.794 | -6.082 | 3.865 | 1.00 | 0.00 |
| ATOM | 512 | H    | GLN | 33 | -4.106 | -5.482 | 3.433 | 1.00 | 0.00 |
| ATOM | 513 | CA   | GLN | 33 | -6.100 | -6.174 | 3.256 | 1.00 | 0.00 |
| ATOM | 514 | HA   | GLN | 33 | -6.880 | -6.157 | 4.017 | 1.00 | 0.00 |
| ATOM | 515 | CB   | GLN | 33 | -6.300 | -4.971 | 2.322 | 1.00 | 0.00 |
| ATOM | 516 | HB2  | GLN | 33 | -5.705 | -5.156 | 1.427 | 1.00 | 0.00 |
| ATOM | 517 | HB3  | GLN | 33 | -7.357 | -4.943 | 2.055 | 1.00 | 0.00 |
| ATOM | 518 | CG   | GLN | 33 | -5.890 | -3.617 | 2.942 | 1.00 | 0.00 |
| ATOM | 519 | HG2  | GLN | 33 | -6.293 | -3.531 | 3.951 | 1.00 | 0.00 |
| ATOM | 520 | HG3  | GLN | 33 | -4.801 | -3.589 | 2.982 | 1.00 | 0.00 |
| ATOM | 521 | CD   | GLN | 33 | -6.374 | -2.439 | 2.127 | 1.00 | 0.00 |
| ATOM | 522 | OE1  | GLN | 33 | -5.657 | -1.904 | 1.261 | 1.00 | 0.00 |
| ATOM | 523 | NE2  | GLN | 33 | -7.619 | -2.041 | 2.377 | 1.00 | 0.00 |
| ATOM | 524 | HE21 | GLN | 33 | -8.008 | -1.259 | 1.869 | 1.00 | 0.00 |
| ATOM | 525 | HE22 | GLN | 33 | -8.170 | -2.522 | 3.073 | 1.00 | 0.00 |
| ATOM | 526 | C    | GLN | 33 | -6.253 | -7.511 | 2.500 | 1.00 | 0.00 |
| ATOM | 527 | O    | GLN | 33 | -7.269 | -7.743 | 1.887 | 1.00 | 0.00 |
| ATOM | 528 | N    | GLN | 34 | -5.213 | -8.339 | 2.466 | 1.00 | 0.00 |
| ATOM | 529 | H    | GLN | 34 | -4.356 | -8.070 | 2.927 | 1.00 | 0.00 |

|      |     |      |     |    |        |         |        |      |      |
|------|-----|------|-----|----|--------|---------|--------|------|------|
| ATOM | 530 | CA   | GLN | 34 | -5.251 | -9.628  | 1.766  | 1.00 | 0.00 |
| ATOM | 531 | HA   | GLN | 34 | -6.232 | -9.795  | 1.320  | 1.00 | 0.00 |
| ATOM | 532 | CB   | GLN | 34 | -4.196 | -9.613  | 0.643  | 1.00 | 0.00 |
| ATOM | 533 | HB2  | GLN | 34 | -3.218 | -9.539  | 1.118  | 1.00 | 0.00 |
| ATOM | 534 | HB3  | GLN | 34 | -4.272 | -10.563 | 0.114  | 1.00 | 0.00 |
| ATOM | 535 | CG   | GLN | 34 | -4.366 | -8.476  | -0.337 | 1.00 | 0.00 |
| ATOM | 536 | HG2  | GLN | 34 | -5.371 | -8.499  | -0.759 | 1.00 | 0.00 |
| ATOM | 537 | HG3  | GLN | 34 | -4.229 | -7.550  | 0.222  | 1.00 | 0.00 |
| ATOM | 538 | CD   | GLN | 34 | -3.367 | -8.509  | -1.468 | 1.00 | 0.00 |
| ATOM | 539 | OE1  | GLN | 34 | -3.483 | -9.293  | -2.409 | 1.00 | 0.00 |
| ATOM | 540 | NE2  | GLN | 34 | -2.400 | -7.628  | -1.395 | 1.00 | 0.00 |
| ATOM | 541 | HE21 | GLN | 34 | -1.697 | -7.594  | -2.119 | 1.00 | 0.00 |
| ATOM | 542 | HE22 | GLN | 34 | -2.363 | -6.987  | -0.616 | 1.00 | 0.00 |
| ATOM | 543 | C    | GLN | 34 | -4.985 | -10.861 | 2.604  | 1.00 | 0.00 |
| ATOM | 544 | O    | GLN | 34 | -5.405 | -11.958 | 2.217  | 1.00 | 0.00 |
| ATOM | 545 | N    | GLY | 35 | -4.218 | -10.746 | 3.684  | 1.00 | 0.00 |
| ATOM | 546 | H    | GLY | 35 | -3.965 | -9.843  | 4.059  | 1.00 | 0.00 |
| ATOM | 547 | CA   | GLY | 35 | -3.716 | -11.948 | 4.363  | 1.00 | 0.00 |
| ATOM | 548 | HA2  | GLY | 35 | -3.141 | -11.653 | 5.240  | 1.00 | 0.00 |
| ATOM | 549 | HA3  | GLY | 35 | -4.559 | -12.566 | 4.672  | 1.00 | 0.00 |
| ATOM | 550 | C    | GLY | 35 | -2.818 | -12.762 | 3.430  | 1.00 | 0.00 |
| ATOM | 551 | O    | GLY | 35 | -2.126 | -12.179 | 2.605  | 1.00 | 0.00 |

|      |     |      |     |    |        |         |        |      |      |
|------|-----|------|-----|----|--------|---------|--------|------|------|
| ATOM | 552 | N    | GLN | 36 | -2.864 | -14.092 | 3.530  | 1.00 | 0.00 |
| ATOM | 553 | H    | GLN | 36 | -3.618 | -14.518 | 4.050  | 1.00 | 0.00 |
| ATOM | 554 | CA   | GLN | 36 | -1.787 | -14.962 | 3.019  | 1.00 | 0.00 |
| ATOM | 555 | HA   | GLN | 36 | -0.874 | -14.744 | 3.572  | 1.00 | 0.00 |
| ATOM | 556 | CB   | GLN | 36 | -2.108 | -16.476 | 3.167  | 1.00 | 0.00 |
| ATOM | 557 | HB2  | GLN | 36 | -3.188 | -16.549 | 3.295  | 1.00 | 0.00 |
| ATOM | 558 | HB3  | GLN | 36 | -1.822 | -16.943 | 2.225  | 1.00 | 0.00 |
| ATOM | 559 | CG   | GLN | 36 | -1.407 | -17.192 | 4.326  | 1.00 | 0.00 |
| ATOM | 560 | HG2  | GLN | 36 | -1.673 | -16.705 | 5.264  | 1.00 | 0.00 |
| ATOM | 561 | HG3  | GLN | 36 | -1.751 | -18.226 | 4.343  | 1.00 | 0.00 |
| ATOM | 562 | CD   | GLN | 36 | 0.108  | -17.186 | 4.187  | 1.00 | 0.00 |
| ATOM | 563 | OE1  | GLN | 36 | 0.676  | -17.844 | 3.307  | 1.00 | 0.00 |
| ATOM | 564 | NE2  | GLN | 36 | 0.769  | -16.425 | 5.051  | 1.00 | 0.00 |
| ATOM | 565 | HE21 | GLN | 36 | 1.777  | -16.378 | 5.010  | 1.00 | 0.00 |
| ATOM | 566 | HE22 | GLN | 36 | 0.260  | -15.896 | 5.745  | 1.00 | 0.00 |
| ATOM | 567 | C    | GLN | 36 | -1.407 | -14.637 | 1.580  | 1.00 | 0.00 |
| ATOM | 568 | O    | GLN | 36 | -2.119 | -14.946 | 0.631  | 1.00 | 0.00 |
| ATOM | 569 | N    | VAL | 37 | -0.266 | -13.981 | 1.450  | 1.00 | 0.00 |
| ATOM | 570 | H    | VAL | 37 | 0.202  | -13.654 | 2.282  | 1.00 | 0.00 |
| ATOM | 571 | CA   | VAL | 37 | 0.290  | -13.625 | 0.168  | 1.00 | 0.00 |
| ATOM | 572 | HA   | VAL | 37 | -0.221 | -14.102 | -0.669 | 1.00 | 0.00 |
| ATOM | 573 | CB   | VAL | 37 | 0.280  | -12.066 | -0.059 | 1.00 | 0.00 |

|      |     |      |     |    |        |         |        |      |      |
|------|-----|------|-----|----|--------|---------|--------|------|------|
| ATOM | 574 | HB   | VAL | 37 | -0.749 | -11.766 | -0.258 | 1.00 | 0.00 |
| ATOM | 575 | CG1  | VAL | 37 | 0.814  | -11.286 | 1.137  | 1.00 | 0.00 |
| ATOM | 576 | HG11 | VAL | 37 | 1.843  | -11.584 | 1.336  | 1.00 | 0.00 |
| ATOM | 577 | HG12 | VAL | 37 | 0.781  | -10.218 | 0.919  | 1.00 | 0.00 |
| ATOM | 578 | HG13 | VAL | 37 | 0.199  | -11.496 | 2.012  | 1.00 | 0.00 |
| ATOM | 579 | CG2  | VAL | 37 | 1.025  | -11.677 | -1.306 | 1.00 | 0.00 |
| ATOM | 580 | HG21 | VAL | 37 | 0.560  | -12.150 | -2.171 | 1.00 | 0.00 |
| ATOM | 581 | HG22 | VAL | 37 | 0.994  | -10.594 | -1.426 | 1.00 | 0.00 |
| ATOM | 582 | HG23 | VAL | 37 | 2.062  | -12.004 | -1.228 | 1.00 | 0.00 |
| ATOM | 583 | C    | VAL | 37 | 1.689  | -14.272 | 0.166  | 1.00 | 0.00 |
| ATOM | 584 | O    | VAL | 37 | 2.528  | -14.041 | 1.056  | 1.00 | 0.00 |
| ATOM | 585 | N    | GLY | 38 | 1.908  | -15.093 | -0.830 | 1.00 | 0.00 |
| ATOM | 586 | H    | GLY | 38 | 1.171  | -15.367 | -1.465 | 1.00 | 0.00 |
| ATOM | 587 | CA   | GLY | 38 | 3.248  | -15.638 | -1.046 | 1.00 | 0.00 |
| ATOM | 588 | HA2  | GLY | 38 | 3.487  | -16.200 | -0.143 | 1.00 | 0.00 |
| ATOM | 589 | HA3  | GLY | 38 | 3.155  | -16.325 | -1.887 | 1.00 | 0.00 |
| ATOM | 590 | C    | GLY | 38 | 4.370  | -14.658 | -1.330 | 1.00 | 0.00 |
| ATOM | 591 | O    | GLY | 38 | 4.128  | -13.514 | -1.710 | 1.00 | 0.00 |
| ATOM | 592 | N    | PRO | 39 | 5.613  | -15.092 | -1.167 | 1.00 | 0.00 |
| ATOM | 593 | CD   | PRO | 39 | 6.029  | -16.442 | -0.687 | 1.00 | 0.00 |
| ATOM | 594 | HD2  | PRO | 39 | 5.507  | -17.210 | -1.258 | 1.00 | 0.00 |
| ATOM | 595 | HD3  | PRO | 39 | 5.784  | -16.546 | 0.370  | 1.00 | 0.00 |



|      |     |     |     |    |       |         |        |      |      |
|------|-----|-----|-----|----|-------|---------|--------|------|------|
| ATOM | 596 | CG  | PRO | 39 | 7.481 | -16.446 | -0.930 | 1.00 | 0.00 |
| ATOM | 597 | HG2 | PRO | 39 | 7.673 | -16.916 | -1.895 | 1.00 | 0.00 |
| ATOM | 598 | HG3 | PRO | 39 | 7.966 | -17.022 | -0.143 | 1.00 | 0.00 |
| ATOM | 599 | CB  | PRO | 39 | 7.941 | -15.036 | -0.914 | 1.00 | 0.00 |
| ATOM | 600 | HB2 | PRO | 39 | 8.810 | -14.851 | -1.546 | 1.00 | 0.00 |
| ATOM | 601 | HB3 | PRO | 39 | 8.166 | -14.735 | 0.109  | 1.00 | 0.00 |
| ATOM | 602 | CA  | PRO | 39 | 6.759 | -14.258 | -1.430 | 1.00 | 0.00 |
| ATOM | 603 | HA  | PRO | 39 | 6.669 | -13.376 | -0.796 | 1.00 | 0.00 |
| ATOM | 604 | C   | PRO | 39 | 6.885 | -13.831 | -2.863 | 1.00 | 0.00 |
| ATOM | 605 | O   | PRO | 39 | 7.423 | -12.681 | -3.108 | 1.00 | 0.00 |
| ATOM | 606 | N   | GLN | 40 | 6.378 | -14.586 | -3.850 | 1.00 | 0.00 |
| ATOM | 607 | H   | GLN | 40 | 5.955 | -15.486 | -3.674 | 1.00 | 0.00 |
| ATOM | 608 | CA  | GLN | 40 | 6.507 | -14.159 | -5.185 | 1.00 | 0.00 |
| ATOM | 609 | HA  | GLN | 40 | 7.512 | -13.772 | -5.355 | 1.00 | 0.00 |
| ATOM | 610 | CB  | GLN | 40 | 6.267 | -15.309 | -6.130 | 1.00 | 0.00 |
| ATOM | 611 | HB2 | GLN | 40 | 5.292 | -15.747 | -5.917 | 1.00 | 0.00 |
| ATOM | 612 | HB3 | GLN | 40 | 6.280 | -14.936 | -7.154 | 1.00 | 0.00 |
| ATOM | 613 | CG  | GLN | 40 | 7.345 | -16.367 | -5.962 | 1.00 | 0.00 |
| ATOM | 614 | HG2 | GLN | 40 | 8.326 | -16.009 | -6.274 | 1.00 | 0.00 |
| ATOM | 615 | HG3 | GLN | 40 | 7.354 | -16.561 | -4.890 | 1.00 | 0.00 |
| ATOM | 616 | CD  | GLN | 40 | 7.045 | -17.686 | -6.699 | 1.00 | 0.00 |
| ATOM | 617 | OE1 | GLN | 40 | 6.510 | -18.653 | -6.137 | 1.00 | 0.00 |

|      |     |      |     |    |        |         |        |      |      |
|------|-----|------|-----|----|--------|---------|--------|------|------|
| ATOM | 618 | NE2  | GLN | 40 | 7.284  | -17.674 | -7.929 | 1.00 | 0.00 |
| ATOM | 619 | HE21 | GLN | 40 | 7.113  | -18.502 | -8.482 | 1.00 | 0.00 |
| ATOM | 620 | HE22 | GLN | 40 | 7.646  | -16.836 | -8.362 | 1.00 | 0.00 |
| ATOM | 621 | C    | GLN | 40 | 5.529  | -12.984 | -5.406 | 1.00 | 0.00 |
| ATOM | 622 | O    | GLN | 40 | 5.851  | -11.981 | -6.061 | 1.00 | 0.00 |
| ATOM | 623 | N    | GLN | 41 | 4.302  | -13.150 | -4.918 | 1.00 | 0.00 |
| ATOM | 624 | H    | GLN | 41 | 4.011  | -14.037 | -4.532 | 1.00 | 0.00 |
| ATOM | 625 | CA   | GLN | 41 | 3.313  | -12.063 | -4.991 | 1.00 | 0.00 |
| ATOM | 626 | HA   | GLN | 41 | 3.213  | -11.740 | -6.028 | 1.00 | 0.00 |
| ATOM | 627 | CB   | GLN | 41 | 1.955  | -12.501 | -4.489 | 1.00 | 0.00 |
| ATOM | 628 | HB2  | GLN | 41 | 1.692  | -13.463 | -4.928 | 1.00 | 0.00 |
| ATOM | 629 | HB3  | GLN | 41 | 1.974  | -12.590 | -3.403 | 1.00 | 0.00 |
| ATOM | 630 | CG   | GLN | 41 | 0.919  | -11.458 | -4.895 | 1.00 | 0.00 |
| ATOM | 631 | HG2  | GLN | 41 | 1.126  | -10.565 | -4.305 | 1.00 | 0.00 |
| ATOM | 632 | HG3  | GLN | 41 | 1.065  | -11.236 | -5.952 | 1.00 | 0.00 |
| ATOM | 633 | CD   | GLN | 41 | -0.515 | -11.852 | -4.681 | 1.00 | 0.00 |
| ATOM | 634 | OE1  | GLN | 41 | -0.865 | -13.037 | -4.572 | 1.00 | 0.00 |
| ATOM | 635 | NE2  | GLN | 41 | -1.367 | -10.852 | -4.634 | 1.00 | 0.00 |
| ATOM | 636 | HE21 | GLN | 41 | -2.350 | -11.036 | -4.493 | 1.00 | 0.00 |
| ATOM | 637 | HE22 | GLN | 41 | -1.035 | -9.904  | -4.739 | 1.00 | 0.00 |
| ATOM | 638 | C    | GLN | 41 | 3.739  | -10.821 | -4.224 | 1.00 | 0.00 |
| ATOM | 639 | O    | GLN | 41 | 3.584  | -9.694  | -4.726 | 1.00 | 0.00 |

|      |     |      |     |    |       |         |        |      |      |
|------|-----|------|-----|----|-------|---------|--------|------|------|
| ATOM | 640 | N    | VAL | 42 | 4.346 | -11.023 | -3.087 | 1.00 | 0.00 |
| ATOM | 641 | H    | VAL | 42 | 4.468 | -11.936 | -2.673 | 1.00 | 0.00 |
| ATOM | 642 | CA   | VAL | 42 | 4.887 | -9.831  | -2.353 | 1.00 | 0.00 |
| ATOM | 643 | HA   | VAL | 42 | 4.127 | -9.077  | -2.144 | 1.00 | 0.00 |
| ATOM | 644 | CB   | VAL | 42 | 5.551 | -10.237 | -1.033 | 1.00 | 0.00 |
| ATOM | 645 | HB   | VAL | 42 | 6.213 | -11.079 | -1.234 | 1.00 | 0.00 |
| ATOM | 646 | CG1  | VAL | 42 | 6.358 | -9.090  | -0.408 | 1.00 | 0.00 |
| ATOM | 647 | HG11 | VAL | 42 | 5.696 | -8.247  | -0.207 | 1.00 | 0.00 |
| ATOM | 648 | HG12 | VAL | 42 | 6.808 | -9.428  | 0.525  | 1.00 | 0.00 |
| ATOM | 649 | HG13 | VAL | 42 | 7.142 | -8.779  | -1.098 | 1.00 | 0.00 |
| ATOM | 650 | CG2  | VAL | 42 | 4.472 | -10.755 | -0.121 | 1.00 | 0.00 |
| ATOM | 651 | HG21 | VAL | 42 | 3.987 | -11.615 | -0.583 | 1.00 | 0.00 |
| ATOM | 652 | HG22 | VAL | 42 | 4.912 | -11.053 | 0.830  | 1.00 | 0.00 |
| ATOM | 653 | HG23 | VAL | 42 | 3.733 | -9.971  | 0.050  | 1.00 | 0.00 |
| ATOM | 654 | C    | VAL | 42 | 5.922 | -9.127  | -3.224 | 1.00 | 0.00 |
| ATOM | 655 | O    | VAL | 42 | 5.938 | -7.870  | -3.320 | 1.00 | 0.00 |
| ATOM | 656 | N    | GLY | 43 | 6.877 | -9.839  | -3.813 | 1.00 | 0.00 |
| ATOM | 657 | H    | GLY | 43 | 6.949 | -10.835 | -3.666 | 1.00 | 0.00 |
| ATOM | 658 | CA   | GLY | 43 | 7.813 | -9.221  | -4.659 | 1.00 | 0.00 |
| ATOM | 659 | HA2  | GLY | 43 | 8.374 | -8.497  | -4.069 | 1.00 | 0.00 |
| ATOM | 660 | HA3  | GLY | 43 | 8.490 | -9.989  | -5.031 | 1.00 | 0.00 |
| ATOM | 661 | C    | GLY | 43 | 7.190 | -8.522  | -5.819 | 1.00 | 0.00 |

|      |     |     |     |    |       |         |         |      |      |
|------|-----|-----|-----|----|-------|---------|---------|------|------|
| ATOM | 662 | O   | GLY | 43 | 7.581 | -7.393  | -6.094  | 1.00 | 0.00 |
| ATOM | 663 | N   | HIE | 44 | 6.207 | -9.070  | -6.454  | 1.00 | 0.00 |
| ATOM | 664 | H   | HIE | 44 | 6.031 | -10.055 | -6.318  | 1.00 | 0.00 |
| ATOM | 665 | CA  | HIE | 44 | 5.442 | -8.367  | -7.472  | 1.00 | 0.00 |
| ATOM | 666 | HA  | HIE | 44 | 6.105 | -7.985  | -8.248  | 1.00 | 0.00 |
| ATOM | 667 | CB  | HIE | 44 | 4.437 | -9.336  | -8.118  | 1.00 | 0.00 |
| ATOM | 668 | HB2 | HIE | 44 | 4.847 | -10.234 | -8.581  | 1.00 | 0.00 |
| ATOM | 669 | HB3 | HIE | 44 | 3.791 | -9.618  | -7.286  | 1.00 | 0.00 |
| ATOM | 670 | CG  | HIE | 44 | 3.559 | -8.692  | -9.140  | 1.00 | 0.00 |
| ATOM | 671 | ND1 | HIE | 44 | 4.046 | -8.295  | -10.365 | 1.00 | 0.00 |
| ATOM | 672 | CE1 | HIE | 44 | 3.072 | -7.748  | -11.070 | 1.00 | 0.00 |
| ATOM | 673 | HE1 | HIE | 44 | 3.235 | -7.420  | -12.097 | 1.00 | 0.00 |
| ATOM | 674 | NE2 | HIE | 44 | 1.992 | -7.707  | -10.308 | 1.00 | 0.00 |
| ATOM | 675 | HE2 | HIE | 44 | 1.090 | -7.342  | -10.580 | 1.00 | 0.00 |
| ATOM | 676 | CD2 | HIE | 44 | 2.287 | -8.242  | -9.079  | 1.00 | 0.00 |
| ATOM | 677 | HD2 | HIE | 44 | 1.536 | -8.238  | -8.289  | 1.00 | 0.00 |
| ATOM | 678 | C   | HIE | 44 | 4.787 | -7.075  | -6.968  | 1.00 | 0.00 |
| ATOM | 679 | O   | HIE | 44 | 4.777 | -6.094  | -7.690  | 1.00 | 0.00 |
| ATOM | 680 | N   | MET | 45 | 4.235 | -7.081  | -5.785  | 1.00 | 0.00 |
| ATOM | 681 | H   | MET | 45 | 4.127 | -7.927  | -5.245  | 1.00 | 0.00 |
| ATOM | 682 | CA  | MET | 45 | 3.629 | -5.840  | -5.268  | 1.00 | 0.00 |
| ATOM | 683 | HA  | MET | 45 | 2.924 | -5.439  | -5.997  | 1.00 | 0.00 |

|      |     |     |     |    |       |        |        |      |      |
|------|-----|-----|-----|----|-------|--------|--------|------|------|
| ATOM | 684 | CB  | MET | 45 | 2.885 | -6.117 | -3.975 | 1.00 | 0.00 |
| ATOM | 685 | HB2 | MET | 45 | 3.586 | -6.579 | -3.281 | 1.00 | 0.00 |
| ATOM | 686 | HB3 | MET | 45 | 2.552 | -5.160 | -3.572 | 1.00 | 0.00 |
| ATOM | 687 | CG  | MET | 45 | 1.681 | -7.034 | -4.168 | 1.00 | 0.00 |
| ATOM | 688 | HG2 | MET | 45 | 0.912 | -6.440 | -4.664 | 1.00 | 0.00 |
| ATOM | 689 | HG3 | MET | 45 | 2.002 | -7.837 | -4.831 | 1.00 | 0.00 |
| ATOM | 690 | SD  | MET | 45 | 1.004 | -7.742 | -2.672 | 1.00 | 0.00 |
| ATOM | 691 | CE  | MET | 45 | 0.802 | -6.162 | -1.797 | 1.00 | 0.00 |
| ATOM | 692 | HE1 | MET | 45 | 0.130 | -5.516 | -2.363 | 1.00 | 0.00 |
| ATOM | 693 | HE2 | MET | 45 | 0.382 | -6.345 | -0.808 | 1.00 | 0.00 |
| ATOM | 694 | HE3 | MET | 45 | 1.772 | -5.676 | -1.695 | 1.00 | 0.00 |
| ATOM | 695 | C   | MET | 45 | 4.669 | -4.748 | -5.126 | 1.00 | 0.00 |
| ATOM | 696 | O   | MET | 45 | 4.404 | -3.580 | -5.386 | 1.00 | 0.00 |
| ATOM | 697 | N   | TYR | 46 | 5.862 | -5.073 | -4.672 | 1.00 | 0.00 |
| ATOM | 698 | H   | TYR | 46 | 6.042 | -5.979 | -4.265 | 1.00 | 0.00 |
| ATOM | 699 | CA  | TYR | 46 | 6.918 | -4.094 | -4.653 | 1.00 | 0.00 |
| ATOM | 700 | HA  | TYR | 46 | 6.558 | -3.186 | -4.168 | 1.00 | 0.00 |
| ATOM | 701 | CB  | TYR | 46 | 8.145 | -4.604 | -3.891 | 1.00 | 0.00 |
| ATOM | 702 | HB2 | TYR | 46 | 8.324 | -5.631 | -4.207 | 1.00 | 0.00 |
| ATOM | 703 | HB3 | TYR | 46 | 8.985 | -3.979 | -4.194 | 1.00 | 0.00 |
| ATOM | 704 | CG  | TYR | 46 | 8.001 | -4.558 | -2.408 | 1.00 | 0.00 |
| ATOM | 705 | CD1 | TYR | 46 | 8.212 | -3.395 | -1.686 | 1.00 | 0.00 |

|      |     |         |    |       |        |         |      |      |
|------|-----|---------|----|-------|--------|---------|------|------|
| ATOM | 706 | HD1 TYR | 46 | 8.605 | -2.509 | -2.185  | 1.00 | 0.00 |
| ATOM | 707 | CE1 TYR | 46 | 7.921 | -3.356 | -0.317  | 1.00 | 0.00 |
| ATOM | 708 | HE1 TYR | 46 | 8.063 | -2.412 | 0.210   | 1.00 | 0.00 |
| ATOM | 709 | CZ TYR  | 46 | 7.709 | -4.466 | 0.363   | 1.00 | 0.00 |
| ATOM | 710 | OH TYR  | 46 | 7.447 | -4.467 | 1.763   | 1.00 | 0.00 |
| ATOM | 711 | HH TYR  | 46 | 7.443 | -3.586 | 2.144   | 1.00 | 0.00 |
| ATOM | 712 | CE2 TYR | 46 | 7.495 | -5.643 | -0.325  | 1.00 | 0.00 |
| ATOM | 713 | HE2 TYR | 46 | 7.211 | -6.548 | 0.211   | 1.00 | 0.00 |
| ATOM | 714 | CD2 TYR | 46 | 7.639 | -5.670 | -1.672  | 1.00 | 0.00 |
| ATOM | 715 | HD2 TYR | 46 | 7.467 | -6.596 | -2.220  | 1.00 | 0.00 |
| ATOM | 716 | C TYR   | 46 | 7.336 | -3.616 | -6.027  | 1.00 | 0.00 |
| ATOM | 717 | O TYR   | 46 | 7.676 | -2.423 | -6.260  | 1.00 | 0.00 |
| ATOM | 718 | N ARG   | 47 | 7.357 | -4.512 | -7.004  | 1.00 | 0.00 |
| ATOM | 719 | H ARG   | 47 | 7.326 | -5.495 | -6.776  | 1.00 | 0.00 |
| ATOM | 720 | CA ARG  | 47 | 7.586 | -4.135 | -8.382  | 1.00 | 0.00 |
| ATOM | 721 | HA ARG  | 47 | 8.509 | -3.561 | -8.460  | 1.00 | 0.00 |
| ATOM | 722 | CB ARG  | 47 | 7.708 | -5.381 | -9.266  | 1.00 | 0.00 |
| ATOM | 723 | HB2 ARG | 47 | 8.441 | -6.049 | -8.814  | 1.00 | 0.00 |
| ATOM | 724 | HB3 ARG | 47 | 6.736 | -5.874 | -9.295  | 1.00 | 0.00 |
| ATOM | 725 | CG ARG  | 47 | 8.146 | -5.034 | -10.692 | 1.00 | 0.00 |
| ATOM | 726 | HG2 ARG | 47 | 7.545 | -4.205 | -11.067 | 1.00 | 0.00 |
| ATOM | 727 | HG3 ARG | 47 | 9.197 | -4.748 | -10.691 | 1.00 | 0.00 |

|      |     |      |     |    |        |        |         |      |      |
|------|-----|------|-----|----|--------|--------|---------|------|------|
| ATOM | 728 | CD   | ARG | 47 | 7.950  | -6.257 | -11.596 | 1.00 | 0.00 |
| ATOM | 729 | HD2  | ARG | 47 | 8.730  | -6.959 | -11.302 | 1.00 | 0.00 |
| ATOM | 730 | HD3  | ARG | 47 | 6.975  | -6.662 | -11.324 | 1.00 | 0.00 |
| ATOM | 731 | NE   | ARG | 47 | 7.998  | -6.082 | -13.076 | 1.00 | 0.00 |
| ATOM | 732 | HE   | ARG | 47 | 7.109  | -5.924 | -13.530 | 1.00 | 0.00 |
| ATOM | 733 | CZ   | ARG | 47 | 9.105  | -6.127 | -13.833 | 1.00 | 0.00 |
| ATOM | 734 | NH1  | ARG | 47 | 10.324 | -6.286 | -13.302 | 1.00 | 0.00 |
| ATOM | 735 | HH11 | ARG | 47 | 10.427 | -6.376 | -12.302 | 1.00 | 0.00 |
| ATOM | 736 | HH12 | ARG | 47 | 11.134 | -6.315 | -13.905 | 1.00 | 0.00 |
| ATOM | 737 | NH2  | ARG | 47 | 8.998  | -6.001 | -15.152 | 1.00 | 0.00 |
| ATOM | 738 | HH21 | ARG | 47 | 8.088  | -5.873 | -15.572 | 1.00 | 0.00 |
| ATOM | 739 | HH22 | ARG | 47 | 9.827  | -6.034 | -15.728 | 1.00 | 0.00 |
| ATOM | 740 | C    | ARG | 47 | 6.581  | -3.151 | -8.907  | 1.00 | 0.00 |
| ATOM | 741 | O    | ARG | 47 | 6.948  | -2.153 | -9.550  | 1.00 | 0.00 |
| ATOM | 742 | N    | VAL | 48 | 5.321  | -3.396 | -8.659  | 1.00 | 0.00 |
| ATOM | 743 | H    | VAL | 48 | 5.076  | -4.218 | -8.127  | 1.00 | 0.00 |
| ATOM | 744 | CA   | VAL | 48 | 4.240  | -2.497 | -9.090  | 1.00 | 0.00 |
| ATOM | 745 | HA   | VAL | 48 | 4.264  | -2.412 | -10.177 | 1.00 | 0.00 |
| ATOM | 746 | CB   | VAL | 48 | 2.864  | -3.029 | -8.670  | 1.00 | 0.00 |
| ATOM | 747 | HB   | VAL | 48 | 2.910  | -3.290 | -7.613  | 1.00 | 0.00 |
| ATOM | 748 | CG1  | VAL | 48 | 1.775  | -2.021 | -8.889  | 1.00 | 0.00 |
| ATOM | 749 | HG11 | VAL | 48 | 1.728  | -1.760 | -9.946  | 1.00 | 0.00 |

|      |     |          |    |       |        |         |      |      |
|------|-----|----------|----|-------|--------|---------|------|------|
| ATOM | 750 | HG12 VAL | 48 | 0.820 | -2.443 | -8.577  | 1.00 | 0.00 |
| ATOM | 751 | HG13 VAL | 48 | 1.984 | -1.126 | -8.303  | 1.00 | 0.00 |
| ATOM | 752 | CG2 VAL  | 48 | 2.606 | -4.249 | -9.534  | 1.00 | 0.00 |
| ATOM | 753 | HG21 VAL | 48 | 3.385 | -4.990 | -9.358  | 1.00 | 0.00 |
| ATOM | 754 | HG22 VAL | 48 | 1.635 | -4.675 | -9.281  | 1.00 | 0.00 |
| ATOM | 755 | HG23 VAL | 48 | 2.612 | -3.958 | -10.585 | 1.00 | 0.00 |
| ATOM | 756 | C VAL    | 48 | 4.492 | -1.173 | -8.377  | 1.00 | 0.00 |
| ATOM | 757 | O VAL    | 48 | 4.439 | -0.064 | -9.012  | 1.00 | 0.00 |
| ATOM | 758 | N ALA    | 49 | 4.659 | -1.217 | -7.048  | 1.00 | 0.00 |
| ATOM | 759 | H ALA    | 49 | 4.632 | -2.086 | -6.534  | 1.00 | 0.00 |
| ATOM | 760 | CA ALA   | 49 | 4.833 | 0.023  | -6.301  | 1.00 | 0.00 |
| ATOM | 761 | HA ALA   | 49 | 3.934 | 0.625  | -6.441  | 1.00 | 0.00 |
| ATOM | 762 | CB ALA   | 49 | 5.027 | -0.231 | -4.790  | 1.00 | 0.00 |
| ATOM | 763 | HB1 ALA  | 49 | 5.928 | -0.824 | -4.634  | 1.00 | 0.00 |
| ATOM | 764 | HB2 ALA  | 49 | 5.125 | 0.722  | -4.271  | 1.00 | 0.00 |
| ATOM | 765 | HB3 ALA  | 49 | 4.164 | -0.770 | -4.398  | 1.00 | 0.00 |
| ATOM | 766 | C ALA    | 49 | 5.997 | 0.804  | -6.820  | 1.00 | 0.00 |
| ATOM | 767 | O ALA    | 49 | 5.942 | 2.091  | -6.850  | 1.00 | 0.00 |
| ATOM | 768 | N SER    | 50 | 7.096 | 0.166  | -7.209  | 1.00 | 0.00 |
| ATOM | 769 | H SER    | 50 | 7.151 | -0.804 | -6.933  | 1.00 | 0.00 |
| ATOM | 770 | CA SER   | 50 | 8.267 | 0.782  | -7.782  | 1.00 | 0.00 |
| ATOM | 771 | HA SER   | 50 | 8.616 | 1.579  | -7.126  | 1.00 | 0.00 |



|      |     |     |     |    |        |        |         |      |      |
|------|-----|-----|-----|----|--------|--------|---------|------|------|
| ATOM | 772 | CB  | SER | 50 | 9.417  | -0.253 | -7.963  | 1.00 | 0.00 |
| ATOM | 773 | HB2 | SER | 50 | 10.379 | 0.255  | -8.022  | 1.00 | 0.00 |
| ATOM | 774 | HB3 | SER | 50 | 9.428  | -0.957 | -7.132  | 1.00 | 0.00 |
| ATOM | 775 | OG  | SER | 50 | 9.180  | -0.947 | -9.161  | 1.00 | 0.00 |
| ATOM | 776 | HG  | SER | 50 | 9.875  | -1.594 | -9.299  | 1.00 | 0.00 |
| ATOM | 777 | C   | SER | 50 | 8.029  | 1.637  | -9.035  | 1.00 | 0.00 |
| ATOM | 778 | O   | SER | 50 | 8.781  | 2.567  | -9.276  | 1.00 | 0.00 |
| ATOM | 779 | N   | ARG | 51 | 6.957  | 1.356  | -9.753  | 1.00 | 0.00 |
| ATOM | 780 | H   | ARG | 51 | 6.317  | 0.645  | -9.429  | 1.00 | 0.00 |
| ATOM | 781 | CA  | ARG | 51 | 6.671  | 2.008  | -10.977 | 1.00 | 0.00 |
| ATOM | 782 | HA  | ARG | 51 | 7.611  | 2.308  | -11.440 | 1.00 | 0.00 |
| ATOM | 783 | CB  | ARG | 51 | 5.919  | 1.137  | -11.940 | 1.00 | 0.00 |
| ATOM | 784 | HB2 | ARG | 51 | 5.050  | 0.740  | -11.415 | 1.00 | 0.00 |
| ATOM | 785 | HB3 | ARG | 51 | 5.587  | 1.768  | -12.765 | 1.00 | 0.00 |
| ATOM | 786 | CG  | ARG | 51 | 6.761  | -0.026 | -12.492 | 1.00 | 0.00 |
| ATOM | 787 | HG2 | ARG | 51 | 7.687  | 0.379  | -12.898 | 1.00 | 0.00 |
| ATOM | 788 | HG3 | ARG | 51 | 6.991  | -0.707 | -11.673 | 1.00 | 0.00 |
| ATOM | 789 | CD  | ARG | 51 | 6.024  | -0.772 | -13.572 | 1.00 | 0.00 |
| ATOM | 790 | HD2 | ARG | 51 | 5.052  | -1.081 | -13.187 | 1.00 | 0.00 |
| ATOM | 791 | HD3 | ARG | 51 | 5.881  | -0.108 | -14.425 | 1.00 | 0.00 |
| ATOM | 792 | NE  | ARG | 51 | 6.763  | -1.980 | -14.027 | 1.00 | 0.00 |
| ATOM | 793 | HE  | ARG | 51 | 6.671  | -2.851 | -13.524 | 1.00 | 0.00 |

|      |     |      |     |    |       |        |         |      |      |
|------|-----|------|-----|----|-------|--------|---------|------|------|
| ATOM | 794 | CZ   | ARG | 51 | 7.586 | -1.933 | -15.067 | 1.00 | 0.00 |
| ATOM | 795 | NH1  | ARG | 51 | 7.738 | -0.856 | -15.742 | 1.00 | 0.00 |
| ATOM | 796 | HH11 | ARG | 51 | 7.225 | -0.025 | -15.484 | 1.00 | 0.00 |
| ATOM | 797 | HH12 | ARG | 51 | 8.369 | -0.842 | -16.530 | 1.00 | 0.00 |
| ATOM | 798 | NH2  | ARG | 51 | 8.219 | -3.022 | -15.432 | 1.00 | 0.00 |
| ATOM | 799 | HH21 | ARG | 51 | 8.075 | -3.881 | -14.921 | 1.00 | 0.00 |
| ATOM | 800 | HH22 | ARG | 51 | 8.847 | -2.996 | -16.222 | 1.00 | 0.00 |
| ATOM | 801 | C    | ARG | 51 | 5.838 | 3.251  | -10.732 | 1.00 | 0.00 |
| ATOM | 802 | O    | ARG | 51 | 5.691 | 4.067  | -11.624 | 1.00 | 0.00 |
| ATOM | 803 | N    | ILE | 52 | 5.246 | 3.388  | -9.525  | 1.00 | 0.00 |
| ATOM | 804 | H    | ILE | 52 | 5.374 | 2.703  | -8.795  | 1.00 | 0.00 |
| ATOM | 805 | CA   | ILE | 52 | 4.260 | 4.410  | -9.332  | 1.00 | 0.00 |
| ATOM | 806 | HA   | ILE | 52 | 3.582 | 4.503  | -10.181 | 1.00 | 0.00 |
| ATOM | 807 | CB   | ILE | 52 | 3.444 | 4.137  | -8.049  | 1.00 | 0.00 |
| ATOM | 808 | HB   | ILE | 52 | 4.131 | 3.913  | -7.233  | 1.00 | 0.00 |
| ATOM | 809 | CG2  | ILE | 52 | 2.578 | 5.387  | -7.673  | 1.00 | 0.00 |
| ATOM | 810 | HG21 | ILE | 52 | 1.890 | 5.612  | -8.489  | 1.00 | 0.00 |
| ATOM | 811 | HG22 | ILE | 52 | 2.010 | 5.177  | -6.767  | 1.00 | 0.00 |
| ATOM | 812 | HG23 | ILE | 52 | 3.230 | 6.244  | -7.502  | 1.00 | 0.00 |
| ATOM | 813 | CG1  | ILE | 52 | 2.606 | 2.879  | -8.251  | 1.00 | 0.00 |
| ATOM | 814 | HG12 | ILE | 52 | 1.928 | 3.050  | -9.088  | 1.00 | 0.00 |
| ATOM | 815 | HG13 | ILE | 52 | 3.277 | 2.055  | -8.491  | 1.00 | 0.00 |

|      |     |      |     |    |       |       |         |      |      |
|------|-----|------|-----|----|-------|-------|---------|------|------|
| ATOM | 816 | CD1  | ILE | 52 | 1.797 | 2.530 | -7.003  | 1.00 | 0.00 |
| ATOM | 817 | HD11 | ILE | 52 | 1.124 | 3.354 | -6.763  | 1.00 | 0.00 |
| ATOM | 818 | HD12 | ILE | 52 | 1.213 | 1.628 | -7.188  | 1.00 | 0.00 |
| ATOM | 819 | HD13 | ILE | 52 | 2.474 | 2.359 | -6.167  | 1.00 | 0.00 |
| ATOM | 820 | C    | ILE | 52 | 4.809 | 5.836 | -9.410  | 1.00 | 0.00 |
| ATOM | 821 | O    | ILE | 52 | 4.156 | 6.679 | -10.026 | 1.00 | 0.00 |
| ATOM | 822 | N    | PRO | 53 | 5.960 | 6.065 | -8.871  | 1.00 | 0.00 |
| ATOM | 823 | CD   | PRO | 53 | 6.844 | 5.293 | -7.953  | 1.00 | 0.00 |
| ATOM | 824 | HD2  | PRO | 53 | 7.474 | 4.634 | -8.550  | 1.00 | 0.00 |
| ATOM | 825 | HD3  | PRO | 53 | 6.219 | 4.695 | -7.290  | 1.00 | 0.00 |
| ATOM | 826 | CG   | PRO | 53 | 7.644 | 6.344 | -7.203  | 1.00 | 0.00 |
| ATOM | 827 | HG2  | PRO | 53 | 8.621 | 5.970 | -6.898  | 1.00 | 0.00 |
| ATOM | 828 | HG3  | PRO | 53 | 7.108 | 6.714 | -6.329  | 1.00 | 0.00 |
| ATOM | 829 | CB   | PRO | 53 | 7.768 | 7.404 | -8.237  | 1.00 | 0.00 |
| ATOM | 830 | HB2  | PRO | 53 | 8.568 | 7.099 | -8.911  | 1.00 | 0.00 |
| ATOM | 831 | HB3  | PRO | 53 | 7.999 | 8.384 | -7.820  | 1.00 | 0.00 |
| ATOM | 832 | CA   | PRO | 53 | 6.477 | 7.458 | -8.976  | 1.00 | 0.00 |
| ATOM | 833 | HA   | PRO | 53 | 5.747 | 8.132 | -8.526  | 1.00 | 0.00 |
| ATOM | 834 | C    | PRO | 53 | 6.713 | 7.863 | -10.432 | 1.00 | 0.00 |
| ATOM | 835 | O    | PRO | 53 | 6.250 | 8.942 | -10.810 | 1.00 | 0.00 |
| ATOM | 836 | N    | ALA | 54 | 7.263 | 7.018 | -11.320 | 1.00 | 0.00 |
| ATOM | 837 | H    | ALA | 54 | 7.805 | 6.204 | -11.070 | 1.00 | 0.00 |

|      |     |      |     |    |       |       |         |      |      |
|------|-----|------|-----|----|-------|-------|---------|------|------|
| ATOM | 838 | CA   | ALA | 54 | 7.216 | 7.418 | -12.741 | 1.00 | 0.00 |
| ATOM | 839 | HA   | ALA | 54 | 7.703 | 8.392 | -12.686 | 1.00 | 0.00 |
| ATOM | 840 | CB   | ALA | 54 | 8.054 | 6.509 | -13.597 | 1.00 | 0.00 |
| ATOM | 841 | HB1  | ALA | 54 | 7.574 | 5.533 | -13.669 | 1.00 | 0.00 |
| ATOM | 842 | HB2  | ALA | 54 | 8.154 | 6.939 | -14.594 | 1.00 | 0.00 |
| ATOM | 843 | HB3  | ALA | 54 | 9.041 | 6.396 | -13.150 | 1.00 | 0.00 |
| ATOM | 844 | C    | ALA | 54 | 5.910 | 7.601 | -13.372 | 1.00 | 0.00 |
| ATOM | 845 | O    | ALA | 54 | 5.728 | 8.512 | -14.181 | 1.00 | 0.00 |
| ATOM | 846 | N    | ILE | 55 | 4.928 | 6.774 | -13.086 | 1.00 | 0.00 |
| ATOM | 847 | H    | ILE | 55 | 5.149 | 5.964 | -12.526 | 1.00 | 0.00 |
| ATOM | 848 | CA   | ILE | 55 | 3.595 | 6.882 | -13.640 | 1.00 | 0.00 |
| ATOM | 849 | HA   | ILE | 55 | 3.587 | 6.974 | -14.726 | 1.00 | 0.00 |
| ATOM | 850 | CB   | ILE | 55 | 2.735 | 5.717 | -13.230 | 1.00 | 0.00 |
| ATOM | 851 | HB   | ILE | 55 | 2.892 | 5.548 | -12.165 | 1.00 | 0.00 |
| ATOM | 852 | CG2  | ILE | 55 | 1.249 | 5.949 | -13.494 | 1.00 | 0.00 |
| ATOM | 853 | HG21 | ILE | 55 | 1.090 | 6.118 | -14.559 | 1.00 | 0.00 |
| ATOM | 854 | HG22 | ILE | 55 | 0.682 | 5.074 | -13.177 | 1.00 | 0.00 |
| ATOM | 855 | HG23 | ILE | 55 | 0.912 | 6.822 | -12.935 | 1.00 | 0.00 |
| ATOM | 856 | CG1  | ILE | 55 | 3.284 | 4.505 | -13.914 | 1.00 | 0.00 |
| ATOM | 857 | HG12 | ILE | 55 | 3.082 | 4.595 | -14.982 | 1.00 | 0.00 |
| ATOM | 858 | HG13 | ILE | 55 | 4.361 | 4.478 | -13.749 | 1.00 | 0.00 |
| ATOM | 859 | CD1  | ILE | 55 | 2.680 | 3.268 | -13.404 | 1.00 | 0.00 |

|      |     |      |     |    |       |        |         |      |      |
|------|-----|------|-----|----|-------|--------|---------|------|------|
| ATOM | 860 | HD11 | ILE | 55 | 1.603 | 3.294  | -13.569 | 1.00 | 0.00 |
| ATOM | 861 | HD12 | ILE | 55 | 3.106 | 2.413  | -13.928 | 1.00 | 0.00 |
| ATOM | 862 | HD13 | ILE | 55 | 2.881 | 3.178  | -12.337 | 1.00 | 0.00 |
| ATOM | 863 | C    | ILE | 55 | 3.016 | 8.263  | -13.267 | 1.00 | 0.00 |
| ATOM | 864 | O    | ILE | 55 | 2.405 | 8.922  | -14.108 | 1.00 | 0.00 |
| ATOM | 865 | N    | CYX | 56 | 3.230 | 8.600  | -12.026 | 1.00 | 0.00 |
| ATOM | 866 | H    | CYX | 56 | 3.574 | 7.884  | -11.403 | 1.00 | 0.00 |
| ATOM | 867 | CA   | CYX | 56 | 2.853 | 9.901  | -11.453 | 1.00 | 0.00 |
| ATOM | 868 | HA   | CYX | 56 | 1.872 | 10.204 | -11.820 | 1.00 | 0.00 |
| ATOM | 869 | CB   | CYX | 56 | 2.793 | 9.794  | -9.927  | 1.00 | 0.00 |
| ATOM | 870 | HB2  | CYX | 56 | 3.798 | 9.647  | -9.533  | 1.00 | 0.00 |
| ATOM | 871 | HB3  | CYX | 56 | 2.372 | 10.711 | -9.514  | 1.00 | 0.00 |
| ATOM | 872 | SG   | CYX | 56 | 1.544 | 8.571  | -9.330  | 1.00 | 0.00 |
| ATOM | 873 | C    | CYX | 56 | 3.639 | 11.080 | -11.862 | 1.00 | 0.00 |
| ATOM | 874 | O    | CYX | 56 | 3.324 | 12.184 | -11.438 | 1.00 | 0.00 |
| ATOM | 875 | N    | ASN | 57 | 4.776 | 10.853 | -12.506 | 1.00 | 0.00 |
| ATOM | 876 | H    | ASN | 57 | 5.055 | 9.895  | -12.663 | 1.00 | 0.00 |
| ATOM | 877 | CA   | ASN | 57 | 5.732 | 11.928 | -12.854 | 1.00 | 0.00 |
| ATOM | 878 | HA   | ASN | 57 | 6.598 | 11.528 | -13.382 | 1.00 | 0.00 |
| ATOM | 879 | CB   | ASN | 57 | 5.018 | 12.906 | -13.767 | 1.00 | 0.00 |
| ATOM | 880 | HB2  | ASN | 57 | 4.009 | 12.569 | -14.007 | 1.00 | 0.00 |
| ATOM | 881 | HB3  | ASN | 57 | 4.965 | 13.846 | -13.218 | 1.00 | 0.00 |

|      |     |      |     |    |       |        |         |      |      |
|------|-----|------|-----|----|-------|--------|---------|------|------|
| ATOM | 882 | CG   | ASN | 57 | 5.740 | 13.133 | -15.010 | 1.00 | 0.00 |
| ATOM | 883 | OD1  | ASN | 57 | 6.499 | 12.272 | -15.470 | 1.00 | 0.00 |
| ATOM | 884 | ND2  | ASN | 57 | 5.470 | 14.266 | -15.625 | 1.00 | 0.00 |
| ATOM | 885 | HD21 | ASN | 57 | 5.935 | 14.489 | -16.494 | 1.00 | 0.00 |
| ATOM | 886 | HD22 | ASN | 57 | 4.799 | 14.907 | -15.226 | 1.00 | 0.00 |
| ATOM | 887 | C    | ASN | 57 | 6.354 | 12.522 | -11.646 | 1.00 | 0.00 |
| ATOM | 888 | O    | ASN | 57 | 6.635 | 13.753 | -11.630 | 1.00 | 0.00 |
| ATOM | 889 | N    | LEU | 58 | 6.594 | 11.738 | -10.596 | 1.00 | 0.00 |
| ATOM | 890 | H    | LEU | 58 | 6.341 | 10.764 | -10.683 | 1.00 | 0.00 |
| ATOM | 891 | CA   | LEU | 58 | 7.079 | 12.193 | -9.357  | 1.00 | 0.00 |
| ATOM | 892 | HA   | LEU | 58 | 7.152 | 13.280 | -9.409  | 1.00 | 0.00 |
| ATOM | 893 | CB   | LEU | 58 | 6.213 | 11.820 | -8.161  | 1.00 | 0.00 |
| ATOM | 894 | HB2  | LEU | 58 | 6.155 | 10.732 | -8.184  | 1.00 | 0.00 |
| ATOM | 895 | HB3  | LEU | 58 | 6.749 | 12.137 | -7.267  | 1.00 | 0.00 |
| ATOM | 896 | CG   | LEU | 58 | 4.837 | 12.389 | -8.141  | 1.00 | 0.00 |
| ATOM | 897 | HG   | LEU | 58 | 4.356 | 12.214 | -9.104  | 1.00 | 0.00 |
| ATOM | 898 | CD1  | LEU | 58 | 4.021 | 11.713 | -7.031  | 1.00 | 0.00 |
| ATOM | 899 | HD11 | LEU | 58 | 4.501 | 11.889 | -6.068  | 1.00 | 0.00 |
| ATOM | 900 | HD12 | LEU | 58 | 3.013 | 12.129 | -7.016  | 1.00 | 0.00 |
| ATOM | 901 | HD13 | LEU | 58 | 3.968 | 10.641 | -7.220  | 1.00 | 0.00 |
| ATOM | 902 | CD2  | LEU | 58 | 4.860 | 13.933 | -7.907  | 1.00 | 0.00 |
| ATOM | 903 | HD21 | LEU | 58 | 5.420 | 14.414 | -8.709  | 1.00 | 0.00 |

|      |     |      |     |    |        |        |         |      |      |
|------|-----|------|-----|----|--------|--------|---------|------|------|
| ATOM | 904 | HD22 | LEU | 58 | 3.839  | 14.315 | -7.898  | 1.00 | 0.00 |
| ATOM | 905 | HD23 | LEU | 58 | 5.336  | 14.149 | -6.951  | 1.00 | 0.00 |
| ATOM | 906 | C    | LEU | 58 | 8.487  | 11.714 | -9.150  | 1.00 | 0.00 |
| ATOM | 907 | O    | LEU | 58 | 8.839  | 10.511 | -9.244  | 1.00 | 0.00 |
| ATOM | 908 | N    | GLN | 59 | 9.365  | 12.578 | -8.737  | 1.00 | 0.00 |
| ATOM | 909 | H    | GLN | 59 | 9.123  | 13.558 | -8.686  | 1.00 | 0.00 |
| ATOM | 910 | CA   | GLN | 59 | 10.701 | 12.172 | -8.313  | 1.00 | 0.00 |
| ATOM | 911 | HA   | GLN | 59 | 11.139 | 11.509 | -9.059  | 1.00 | 0.00 |
| ATOM | 912 | CB   | GLN | 59 | 11.618 | 13.409 | -8.151  | 1.00 | 0.00 |
| ATOM | 913 | HB2  | GLN | 59 | 11.168 | 14.068 | -7.408  | 1.00 | 0.00 |
| ATOM | 914 | HB3  | GLN | 59 | 12.588 | 13.066 | -7.792  | 1.00 | 0.00 |
| ATOM | 915 | CG   | GLN | 59 | 11.794 | 14.142 | -9.412  | 1.00 | 0.00 |
| ATOM | 916 | HG2  | GLN | 59 | 10.798 | 14.244 | -9.844  | 1.00 | 0.00 |
| ATOM | 917 | HG3  | GLN | 59 | 12.194 | 15.131 | -9.187  | 1.00 | 0.00 |
| ATOM | 918 | CD   | GLN | 59 | 12.701 | 13.471 | -10.433 | 1.00 | 0.00 |
| ATOM | 919 | OE1  | GLN | 59 | 12.910 | 12.259 | -10.436 | 1.00 | 0.00 |
| ATOM | 920 | NE2  | GLN | 59 | 13.275 | 14.285 | -11.296 | 1.00 | 0.00 |
| ATOM | 921 | HE21 | GLN | 59 | 13.891 | 13.913 | -12.004 | 1.00 | 0.00 |
| ATOM | 922 | HE22 | GLN | 59 | 13.096 | 15.278 | -11.245 | 1.00 | 0.00 |
| ATOM | 923 | C    | GLN | 59 | 10.615 | 11.485 | -6.990  | 1.00 | 0.00 |
| ATOM | 924 | O    | GLN | 59 | 9.784  | 11.810 | -6.174  | 1.00 | 0.00 |
| ATOM | 925 | N    | PRO | 60 | 11.419 | 10.452 | -6.770  | 1.00 | 0.00 |

|      |     |         |    |        |        |         |      |      |
|------|-----|---------|----|--------|--------|---------|------|------|
| ATOM | 926 | CD PRO  | 60 | 11.433 | 9.731  | -5.480  | 1.00 | 0.00 |
| ATOM | 927 | HD2 PRO | 60 | 10.451 | 9.297  | -5.293  | 1.00 | 0.00 |
| ATOM | 928 | HD3 PRO | 60 | 11.683 | 10.424 | -4.676  | 1.00 | 0.00 |
| ATOM | 929 | CG PRO  | 60 | 12.497 | 8.686  | -5.689  | 1.00 | 0.00 |
| ATOM | 930 | HG2 PRO | 60 | 12.040 | 7.756  | -6.026  | 1.00 | 0.00 |
| ATOM | 931 | HG3 PRO | 60 | 13.031 | 8.511  | -4.756  | 1.00 | 0.00 |
| ATOM | 932 | CB PRO  | 60 | 13.402 | 9.249  | -6.719  | 1.00 | 0.00 |
| ATOM | 933 | HB2 PRO | 60 | 13.711 | 8.303  | -7.163  | 1.00 | 0.00 |
| ATOM | 934 | HB3 PRO | 60 | 14.281 | 9.863  | -6.525  | 1.00 | 0.00 |
| ATOM | 935 | CA PRO  | 60 | 12.453 | 9.982  | -7.667  | 1.00 | 0.00 |
| ATOM | 936 | HA PRO  | 60 | 12.858 | 10.760 | -8.315  | 1.00 | 0.00 |
| ATOM | 937 | C PRO   | 60 | 11.679 | 8.998  | -8.493  | 1.00 | 0.00 |
| ATOM | 938 | O PRO   | 60 | 10.663 | 8.469  | -8.039  | 1.00 | 0.00 |
| ATOM | 939 | N MET   | 61 | 12.090 | 8.684  | -9.648  | 1.00 | 0.00 |
| ATOM | 940 | H MET   | 61 | 12.997 | 8.854  | -10.057 | 1.00 | 0.00 |
| ATOM | 941 | CA MET  | 61 | 11.028 | 8.114  | -10.508 | 1.00 | 0.00 |
| ATOM | 942 | HA MET  | 61 | 10.039 | 8.481  | -10.233 | 1.00 | 0.00 |
| ATOM | 943 | CB MET  | 61 | 11.335 | 8.567  | -11.892 | 1.00 | 0.00 |
| ATOM | 944 | HB2 MET | 61 | 12.373 | 8.327  | -12.119 | 1.00 | 0.00 |
| ATOM | 945 | HB3 MET | 61 | 10.680 | 8.042  | -12.588 | 1.00 | 0.00 |
| ATOM | 946 | CG MET  | 61 | 11.121 | 10.066 | -12.029 | 1.00 | 0.00 |
| ATOM | 947 | HG2 MET | 61 | 11.082 | 10.495 | -11.028 | 1.00 | 0.00 |



|      |     |         |    |        |        |         |      |      |
|------|-----|---------|----|--------|--------|---------|------|------|
| ATOM | 948 | HG3 MET | 61 | 11.972 | 10.481 | -12.569 | 1.00 | 0.00 |
| ATOM | 949 | SD MET  | 61 | 9.640  | 10.469 | -12.888 | 1.00 | 0.00 |
| ATOM | 950 | CE MET  | 61 | 9.791  | 9.818  | -14.461 | 1.00 | 0.00 |
| ATOM | 951 | HE1 MET | 61 | 9.919  | 8.738  | -14.397 | 1.00 | 0.00 |
| ATOM | 952 | HE2 MET | 61 | 8.892  | 10.043 | -15.036 | 1.00 | 0.00 |
| ATOM | 953 | HE3 MET | 61 | 10.657 | 10.258 | -14.955 | 1.00 | 0.00 |
| ATOM | 954 | C MET   | 61 | 10.892 | 6.566  | -10.360 | 1.00 | 0.00 |
| ATOM | 955 | O MET   | 61 | 9.951  | 5.934  | -10.848 | 1.00 | 0.00 |
| ATOM | 956 | N ARG   | 62 | 11.765 | 6.009  | -9.561  | 1.00 | 0.00 |
| ATOM | 957 | H ARG   | 62 | 12.481 | 6.570  | -9.122  | 1.00 | 0.00 |
| ATOM | 958 | CA ARG  | 62 | 11.751 | 4.582  | -9.300  | 1.00 | 0.00 |
| ATOM | 959 | HA ARG  | 62 | 10.732 | 4.204  | -9.384  | 1.00 | 0.00 |
| ATOM | 960 | CB ARG  | 62 | 12.637 | 3.835  | -10.311 | 1.00 | 0.00 |
| ATOM | 961 | HB2 ARG | 62 | 12.180 | 3.990  | -11.289 | 1.00 | 0.00 |
| ATOM | 962 | HB3 ARG | 62 | 13.610 | 4.325  | -10.284 | 1.00 | 0.00 |
| ATOM | 963 | CG ARG  | 62 | 12.815 | 2.322  | -10.060 | 1.00 | 0.00 |
| ATOM | 964 | HG2 ARG | 62 | 13.590 | 1.990  | -10.751 | 1.00 | 0.00 |
| ATOM | 965 | HG3 ARG | 62 | 13.176 | 2.226  | -9.036  | 1.00 | 0.00 |
| ATOM | 966 | CD ARG  | 62 | 11.562 | 1.456  | -10.243 | 1.00 | 0.00 |
| ATOM | 967 | HD2 ARG | 62 | 11.798 | 0.435  | -9.943  | 1.00 | 0.00 |
| ATOM | 968 | HD3 ARG | 62 | 10.771 | 1.849  | -9.604  | 1.00 | 0.00 |
| ATOM | 969 | NE ARG  | 62 | 11.077 | 1.439  | -11.640 | 1.00 | 0.00 |

|      |     |      |     |    |        |        |         |      |      |
|------|-----|------|-----|----|--------|--------|---------|------|------|
| ATOM | 970 | HE   | ARG | 62 | 11.167 | 2.323  | -12.121 | 1.00 | 0.00 |
| ATOM | 971 | CZ   | ARG | 62 | 10.537 | 0.401  | -12.302 | 1.00 | 0.00 |
| ATOM | 972 | NH1  | ARG | 62 | 10.351 | -0.809 | -11.742 | 1.00 | 0.00 |
| ATOM | 973 | HH11 | ARG | 62 | 10.622 | -0.965 | -10.782 | 1.00 | 0.00 |
| ATOM | 974 | HH12 | ARG | 62 | 9.940  | -1.555 | -12.285 | 1.00 | 0.00 |
| ATOM | 975 | NH2  | ARG | 62 | 10.182 | 0.585  | -13.582 | 1.00 | 0.00 |
| ATOM | 976 | HH21 | ARG | 62 | 10.324 | 1.485  | -14.018 | 1.00 | 0.00 |
| ATOM | 977 | HH22 | ARG | 62 | 9.774  | -0.177 | -14.104 | 1.00 | 0.00 |
| ATOM | 978 | C    | ARG | 62 | 12.257 | 4.389  | -7.886  | 1.00 | 0.00 |
| ATOM | 979 | O    | ARG | 62 | 13.038 | 5.202  | -7.338  | 1.00 | 0.00 |
| ATOM | 980 | N    | CYX | 63 | 11.732 | 3.366  | -7.247  | 1.00 | 0.00 |
| ATOM | 981 | H    | CYX | 63 | 11.039 | 2.801  | -7.717  | 1.00 | 0.00 |
| ATOM | 982 | CA   | CYX | 63 | 12.144 | 2.980  | -5.943  | 1.00 | 0.00 |
| ATOM | 983 | HA   | CYX | 63 | 12.741 | 3.770  | -5.487  | 1.00 | 0.00 |
| ATOM | 984 | CB   | CYX | 63 | 10.935 | 2.736  | -5.086  | 1.00 | 0.00 |
| ATOM | 985 | HB2  | CYX | 63 | 10.280 | 2.016  | -5.577  | 1.00 | 0.00 |
| ATOM | 986 | HB3  | CYX | 63 | 11.248 | 2.342  | -4.120  | 1.00 | 0.00 |
| ATOM | 987 | SG   | CYX | 63 | 10.004 | 4.286  | -4.964  | 1.00 | 0.00 |
| ATOM | 988 | C    | CYX | 63 | 12.912 | 1.645  | -6.040  | 1.00 | 0.00 |
| ATOM | 989 | O    | CYX | 63 | 12.339 | 0.624  | -6.464  | 1.00 | 0.00 |
| ATOM | 990 | N    | PRO | 64 | 14.178 | 1.645  | -5.623  | 1.00 | 0.00 |
| ATOM | 991 | CD   | PRO | 64 | 14.839 | 2.663  | -4.777  | 1.00 | 0.00 |

|      |      |         |    |        |        |        |      |      |
|------|------|---------|----|--------|--------|--------|------|------|
| ATOM | 992  | HD2 PRO | 64 | 14.117 | 3.060  | -4.062 | 1.00 | 0.00 |
| ATOM | 993  | HD3 PRO | 64 | 15.205 | 3.472  | -5.409 | 1.00 | 0.00 |
| ATOM | 994  | CG PRO  | 64 | 15.949 | 1.908  | -4.115 | 1.00 | 0.00 |
| ATOM | 995  | HG2 PRO | 64 | 15.640 | 1.632  | -3.107 | 1.00 | 0.00 |
| ATOM | 996  | HG3 PRO | 64 | 16.831 | 2.546  | -4.063 | 1.00 | 0.00 |
| ATOM | 997  | CB PRO  | 64 | 16.214 | 0.693  | -4.960 | 1.00 | 0.00 |
| ATOM | 998  | HB2 PRO | 64 | 16.577 | -0.134 | -4.350 | 1.00 | 0.00 |
| ATOM | 999  | HB3 PRO | 64 | 16.939 | 0.912  | -5.744 | 1.00 | 0.00 |
| ATOM | 1000 | CA PRO  | 64 | 14.872 | 0.328  | -5.581 | 1.00 | 0.00 |
| ATOM | 1001 | HA PRO  | 64 | 14.940 | -0.013 | -6.614 | 1.00 | 0.00 |
| ATOM | 1002 | C PRO   | 64 | 14.191 | -0.769 | -4.718 | 1.00 | 0.00 |
| ATOM | 1003 | O PRO   | 64 | 14.083 | -1.958 | -5.123 | 1.00 | 0.00 |
| ATOM | 1004 | N PHE   | 65 | 13.766 | -0.373 | -3.527 | 1.00 | 0.00 |
| ATOM | 1005 | H PHE   | 65 | 13.776 | 0.613  | -3.307 | 1.00 | 0.00 |
| ATOM | 1006 | CA PHE  | 65 | 13.408 | -1.309 | -2.478 | 1.00 | 0.00 |
| ATOM | 1007 | HA PHE  | 65 | 13.314 | -0.786 | -1.526 | 1.00 | 0.00 |
| ATOM | 1008 | CB PHE  | 65 | 12.061 | -1.976 | -2.808 | 1.00 | 0.00 |
| ATOM | 1009 | HB2 PHE | 65 | 12.121 | -2.513 | -3.755 | 1.00 | 0.00 |
| ATOM | 1010 | HB3 PHE | 65 | 11.784 | -2.669 | -2.014 | 1.00 | 0.00 |
| ATOM | 1011 | CG PHE  | 65 | 10.907 | -0.982 | -2.942 | 1.00 | 0.00 |
| ATOM | 1012 | CD1 PHE | 65 | 10.707 | 0.015  | -1.978 | 1.00 | 0.00 |
| ATOM | 1013 | HD1 PHE | 65 | 11.397 | 0.082  | -1.137 | 1.00 | 0.00 |

|      |      |     |     |    |        |        |        |      |      |
|------|------|-----|-----|----|--------|--------|--------|------|------|
| ATOM | 1014 | CE1 | PHE | 65 | 9.666  | 0.896  | -2.080 | 1.00 | 0.00 |
| ATOM | 1015 | HE1 | PHE | 65 | 9.516  | 1.678  | -1.335 | 1.00 | 0.00 |
| ATOM | 1016 | CZ  | PHE | 65 | 8.809  | 0.786  | -3.133 | 1.00 | 0.00 |
| ATOM | 1017 | HZ  | PHE | 65 | 7.968  | 1.476  | -3.204 | 1.00 | 0.00 |
| ATOM | 1018 | CE2 | PHE | 65 | 8.988  | -0.158 | -4.080 | 1.00 | 0.00 |
| ATOM | 1019 | HE2 | PHE | 65 | 8.285  | -0.225 | -4.911 | 1.00 | 0.00 |
| ATOM | 1020 | CD2 | PHE | 65 | 10.045 | -1.030 | -4.004 | 1.00 | 0.00 |
| ATOM | 1021 | HD2 | PHE | 65 | 10.202 | -1.766 | -4.792 | 1.00 | 0.00 |
| ATOM | 1022 | C   | PHE | 65 | 14.523 | -2.354 | -2.186 | 1.00 | 0.00 |
| ATOM | 1023 | O   | PHE | 65 | 14.217 | -3.447 | -1.739 | 1.00 | 0.00 |
| ATOM | 1024 | OXT | PHE | 65 | 15.701 | -2.081 | -2.404 | 1.00 | 0.00 |
| TER  |      |     |     |    |        |        |        |      |      |
| ATOM | 1025 | N   | GLN | 66 | 9.478  | 10.040 | 13.261 | 1.00 | 0.00 |
| ATOM | 1026 | H1  | GLN | 66 | 8.501  | 10.224 | 13.079 | 1.00 | 0.00 |
| ATOM | 1027 | H2  | GLN | 66 | 9.851  | 10.793 | 13.821 | 1.00 | 0.00 |
| ATOM | 1028 | H3  | GLN | 66 | 9.576  | 9.084  | 13.570 | 1.00 | 0.00 |
| ATOM | 1029 | CA  | GLN | 66 | 10.216 | 10.113 | 11.958 | 1.00 | 0.00 |
| ATOM | 1030 | HA  | GLN | 66 | 10.970 | 10.898 | 12.018 | 1.00 | 0.00 |
| ATOM | 1031 | CB  | GLN | 66 | 10.903 | 8.807  | 11.626 | 1.00 | 0.00 |
| ATOM | 1032 | HB2 | GLN | 66 | 11.327 | 8.428  | 12.555 | 1.00 | 0.00 |
| ATOM | 1033 | HB3 | GLN | 66 | 10.130 | 8.124  | 11.275 | 1.00 | 0.00 |
| ATOM | 1034 | CG  | GLN | 66 | 11.990 | 8.915  | 10.584 | 1.00 | 0.00 |

|      |      |      |     |    |        |        |        |      |      |
|------|------|------|-----|----|--------|--------|--------|------|------|
| ATOM | 1035 | HG2  | GLN | 66 | 12.160 | 9.976  | 10.399 | 1.00 | 0.00 |
| ATOM | 1036 | HG3  | GLN | 66 | 12.904 | 8.462  | 10.966 | 1.00 | 0.00 |
| ATOM | 1037 | CD   | GLN | 66 | 11.638 | 8.261  | 9.299  | 1.00 | 0.00 |
| ATOM | 1038 | OE1  | GLN | 66 | 10.359 | 8.131  | 9.042  | 1.00 | 0.00 |
| ATOM | 1039 | NE2  | GLN | 66 | 12.519 | 7.849  | 8.542  | 1.00 | 0.00 |
| ATOM | 1040 | HE21 | GLN | 66 | 12.265 | 7.406  | 7.670  | 1.00 | 0.00 |
| ATOM | 1041 | HE22 | GLN | 66 | 13.490 | 7.957  | 8.797  | 1.00 | 0.00 |
| ATOM | 1042 | C    | GLN | 66 | 9.355  | 10.570 | 10.795 | 1.00 | 0.00 |
| ATOM | 1043 | O    | GLN | 66 | 8.154  | 10.286 | 10.709 | 1.00 | 0.00 |
| ATOM | 1044 | N    | ARG | 67 | 10.016 | 11.319 | 9.917  | 1.00 | 0.00 |
| ATOM | 1045 | H    | ARG | 67 | 11.021 | 11.246 | 9.857  | 1.00 | 0.00 |
| ATOM | 1046 | CA   | ARG | 67 | 9.349  | 12.271 | 9.068  | 1.00 | 0.00 |
| ATOM | 1047 | HA   | ARG | 67 | 8.690  | 12.916 | 9.649  | 1.00 | 0.00 |
| ATOM | 1048 | CB   | ARG | 67 | 10.428 | 13.152 | 8.383  | 1.00 | 0.00 |
| ATOM | 1049 | HB2  | ARG | 67 | 11.033 | 13.560 | 9.192  | 1.00 | 0.00 |
| ATOM | 1050 | HB3  | ARG | 67 | 11.032 | 12.469 | 7.786  | 1.00 | 0.00 |
| ATOM | 1051 | CG   | ARG | 67 | 9.928  | 14.289 | 7.501  | 1.00 | 0.00 |
| ATOM | 1052 | HG2  | ARG | 67 | 10.796 | 14.786 | 7.067  | 1.00 | 0.00 |
| ATOM | 1053 | HG3  | ARG | 67 | 9.322  | 13.857 | 6.705  | 1.00 | 0.00 |
| ATOM | 1054 | CD   | ARG | 67 | 9.096  | 15.306 | 8.278  | 1.00 | 0.00 |
| ATOM | 1055 | HD2  | ARG | 67 | 8.771  | 14.846 | 9.211  | 1.00 | 0.00 |
| ATOM | 1056 | HD3  | ARG | 67 | 9.724  | 16.169 | 8.499  | 1.00 | 0.00 |

|      |      |      |     |    |        |        |        |      |      |
|------|------|------|-----|----|--------|--------|--------|------|------|
| ATOM | 1057 | NE   | ARG | 67 | 7.906  | 15.765 | 7.538  | 1.00 | 0.00 |
| ATOM | 1058 | HE   | ARG | 67 | 8.005  | 15.802 | 6.533  | 1.00 | 0.00 |
| ATOM | 1059 | CZ   | ARG | 67 | 6.733  | 16.134 | 8.080  | 1.00 | 0.00 |
| ATOM | 1060 | NH1  | ARG | 67 | 6.526  | 16.097 | 9.402  | 1.00 | 0.00 |
| ATOM | 1061 | HH11 | ARG | 67 | 7.264  | 15.786 | 10.017 | 1.00 | 0.00 |
| ATOM | 1062 | HH12 | ARG | 67 | 5.632  | 16.381 | 9.778  | 1.00 | 0.00 |
| ATOM | 1063 | NH2  | ARG | 67 | 5.739  | 16.544 | 7.286  | 1.00 | 0.00 |
| ATOM | 1064 | HH21 | ARG | 67 | 5.875  | 16.574 | 6.285  | 1.00 | 0.00 |
| ATOM | 1065 | HH22 | ARG | 67 | 4.856  | 16.822 | 7.690  | 1.00 | 0.00 |
| ATOM | 1066 | C    | ARG | 67 | 8.487  | 11.485 | 8.037  | 1.00 | 0.00 |
| ATOM | 1067 | O    | ARG | 67 | 7.290  | 11.745 | 7.865  | 1.00 | 0.00 |
| ATOM | 1068 | N    | CYX | 68 | 9.142  | 10.519 | 7.430  | 1.00 | 0.00 |
| ATOM | 1069 | H    | CYX | 68 | 10.102 | 10.313 | 7.667  | 1.00 | 0.00 |
| ATOM | 1070 | CA   | CYX | 68 | 8.493  | 9.724  | 6.334  | 1.00 | 0.00 |
| ATOM | 1071 | HA   | CYX | 68 | 8.129  | 10.393 | 5.553  | 1.00 | 0.00 |
| ATOM | 1072 | CB   | CYX | 68 | 9.471  | 8.790  | 5.738  | 1.00 | 0.00 |
| ATOM | 1073 | HB2  | CYX | 68 | 9.885  | 8.151  | 6.517  | 1.00 | 0.00 |
| ATOM | 1074 | HB3  | CYX | 68 | 8.975  | 8.173  | 4.989  | 1.00 | 0.00 |
| ATOM | 1075 | SG   | CYX | 68 | 10.840 | 9.728  | 4.969  | 1.00 | 0.00 |
| ATOM | 1076 | C    | CYX | 68 | 7.317  | 8.982  | 6.892  | 1.00 | 0.00 |
| ATOM | 1077 | O    | CYX | 68 | 6.224  | 8.969  | 6.298  | 1.00 | 0.00 |
| ATOM | 1078 | N    | ARG | 69 | 7.449  | 8.440  | 8.113  | 1.00 | 0.00 |

|      |      |      |     |    |        |       |        |      |      |
|------|------|------|-----|----|--------|-------|--------|------|------|
| ATOM | 1079 | H    | ARG | 69 | 8.303  | 8.447 | 8.652  | 1.00 | 0.00 |
| ATOM | 1080 | CA   | ARG | 69 | 6.274  | 7.709 | 8.661  | 1.00 | 0.00 |
| ATOM | 1081 | HA   | ARG | 69 | 5.904  | 7.006 | 7.914  | 1.00 | 0.00 |
| ATOM | 1082 | CB   | ARG | 69 | 6.649  | 6.922 | 9.938  | 1.00 | 0.00 |
| ATOM | 1083 | HB2  | ARG | 69 | 7.036  | 7.616 | 10.684 | 1.00 | 0.00 |
| ATOM | 1084 | HB3  | ARG | 69 | 5.758  | 6.430 | 10.328 | 1.00 | 0.00 |
| ATOM | 1085 | CG   | ARG | 69 | 7.694  | 5.891 | 9.624  | 1.00 | 0.00 |
| ATOM | 1086 | HG2  | ARG | 69 | 7.372  | 5.350 | 8.734  | 1.00 | 0.00 |
| ATOM | 1087 | HG3  | ARG | 69 | 8.626  | 6.414 | 9.413  | 1.00 | 0.00 |
| ATOM | 1088 | CD   | ARG | 69 | 7.909  | 4.917 | 10.754 | 1.00 | 0.00 |
| ATOM | 1089 | HD2  | ARG | 69 | 6.980  | 4.391 | 10.976 | 1.00 | 0.00 |
| ATOM | 1090 | HD3  | ARG | 69 | 8.679  | 4.195 | 10.484 | 1.00 | 0.00 |
| ATOM | 1091 | NE   | ARG | 69 | 8.341  | 5.637 | 11.957 | 1.00 | 0.00 |
| ATOM | 1092 | HE   | ARG | 69 | 7.599  | 5.965 | 12.559 | 1.00 | 0.00 |
| ATOM | 1093 | CZ   | ARG | 69 | 9.607  | 5.878 | 12.314 | 1.00 | 0.00 |
| ATOM | 1094 | NH1  | ARG | 69 | 10.646 | 5.465 | 11.577 | 1.00 | 0.00 |
| ATOM | 1095 | HH11 | ARG | 69 | 10.482 | 4.954 | 10.721 | 1.00 | 0.00 |
| ATOM | 1096 | HH12 | ARG | 69 | 11.588 | 5.667 | 11.880 | 1.00 | 0.00 |
| ATOM | 1097 | NH2  | ARG | 69 | 9.822  | 6.562 | 13.438 | 1.00 | 0.00 |
| ATOM | 1098 | HH21 | ARG | 69 | 9.038  | 6.880 | 13.989 | 1.00 | 0.00 |
| ATOM | 1099 | HH22 | ARG | 69 | 10.767 | 6.759 | 13.732 | 1.00 | 0.00 |
| ATOM | 1100 | C    | ARG | 69 | 5.157  | 8.603 | 8.931  | 1.00 | 0.00 |

|      |      |     |     |    |       |        |        |      |      |
|------|------|-----|-----|----|-------|--------|--------|------|------|
| ATOM | 1101 | O   | ARG | 69 | 4.003 | 8.289  | 8.702  | 1.00 | 0.00 |
| ATOM | 1102 | N   | HIE | 70 | 5.460 | 9.782  | 9.446  | 1.00 | 0.00 |
| ATOM | 1103 | H   | HIE | 70 | 6.410 | 10.038 | 9.675  | 1.00 | 0.00 |
| ATOM | 1104 | CA  | HIE | 70 | 4.444 | 10.711 | 9.697  | 1.00 | 0.00 |
| ATOM | 1105 | HA  | HIE | 70 | 3.681 | 10.258 | 10.331 | 1.00 | 0.00 |
| ATOM | 1106 | CB  | HIE | 70 | 5.001 | 11.950 | 10.410 | 1.00 | 0.00 |
| ATOM | 1107 | HB2 | HIE | 70 | 5.473 | 11.713 | 11.363 | 1.00 | 0.00 |
| ATOM | 1108 | HB3 | HIE | 70 | 5.727 | 12.429 | 9.754  | 1.00 | 0.00 |
| ATOM | 1109 | CG  | HIE | 70 | 3.943 | 12.974 | 10.699 | 1.00 | 0.00 |
| ATOM | 1110 | ND1 | HIE | 70 | 2.815 | 12.690 | 11.449 | 1.00 | 0.00 |
| ATOM | 1111 | CE1 | HIE | 70 | 2.051 | 13.767 | 11.512 | 1.00 | 0.00 |
| ATOM | 1112 | HE1 | HIE | 70 | 1.112 | 13.750 | 12.065 | 1.00 | 0.00 |
| ATOM | 1113 | NE2 | HIE | 70 | 2.637 | 14.736 | 10.826 | 1.00 | 0.00 |
| ATOM | 1114 | HE2 | HIE | 70 | 2.281 | 15.674 | 10.703 | 1.00 | 0.00 |
| ATOM | 1115 | CD2 | HIE | 70 | 3.816 | 14.265 | 10.301 | 1.00 | 0.00 |
| ATOM | 1116 | HD2 | HIE | 70 | 4.440 | 14.919 | 9.692  | 1.00 | 0.00 |
| ATOM | 1117 | C   | HIE | 70 | 3.762 | 11.178 | 8.398  | 1.00 | 0.00 |
| ATOM | 1118 | O   | HIE | 70 | 2.574 | 11.308 | 8.368  | 1.00 | 0.00 |
| ATOM | 1119 | N   | GLN | 71 | 4.528 | 11.383 | 7.356  | 1.00 | 0.00 |
| ATOM | 1120 | H   | GLN | 71 | 5.529 | 11.252 | 7.374  | 1.00 | 0.00 |
| ATOM | 1121 | CA  | GLN | 71 | 3.910 | 11.838 | 6.110  | 1.00 | 0.00 |
| ATOM | 1122 | HA  | GLN | 71 | 3.298 | 12.726 | 6.271  | 1.00 | 0.00 |



|      |      |      |     |    |       |        |       |      |      |
|------|------|------|-----|----|-------|--------|-------|------|------|
| ATOM | 1123 | CB   | GLN | 71 | 5.015 | 12.184 | 5.167 | 1.00 | 0.00 |
| ATOM | 1124 | HB2  | GLN | 71 | 5.767 | 11.396 | 5.205 | 1.00 | 0.00 |
| ATOM | 1125 | HB3  | GLN | 71 | 4.607 | 12.248 | 4.158 | 1.00 | 0.00 |
| ATOM | 1126 | CG   | GLN | 71 | 5.656 | 13.516 | 5.541 | 1.00 | 0.00 |
| ATOM | 1127 | HG2  | GLN | 71 | 4.858 | 14.257 | 5.604 | 1.00 | 0.00 |
| ATOM | 1128 | HG3  | GLN | 71 | 6.231 | 13.523 | 6.466 | 1.00 | 0.00 |
| ATOM | 1129 | CD   | GLN | 71 | 6.540 | 13.877 | 4.440 | 1.00 | 0.00 |
| ATOM | 1130 | OE1  | GLN | 71 | 6.053 | 14.082 | 3.364 | 1.00 | 0.00 |
| ATOM | 1131 | NE2  | GLN | 71 | 7.812 | 13.865 | 4.647 | 1.00 | 0.00 |
| ATOM | 1132 | HE21 | GLN | 71 | 8.444 | 14.112 | 3.899 | 1.00 | 0.00 |
| ATOM | 1133 | HE22 | GLN | 71 | 8.170 | 13.610 | 5.556 | 1.00 | 0.00 |
| ATOM | 1134 | C    | GLN | 71 | 3.001 | 10.757 | 5.478 | 1.00 | 0.00 |
| ATOM | 1135 | O    | GLN | 71 | 1.929 | 11.058 | 4.976 | 1.00 | 0.00 |
| ATOM | 1136 | N    | PHE | 72 | 3.417 | 9.513  | 5.597 | 1.00 | 0.00 |
| ATOM | 1137 | H    | PHE | 72 | 4.334 | 9.323  | 5.974 | 1.00 | 0.00 |
| ATOM | 1138 | CA   | PHE | 72 | 2.603 | 8.386  | 5.158 | 1.00 | 0.00 |
| ATOM | 1139 | HA   | PHE | 72 | 2.390 | 8.458  | 4.091 | 1.00 | 0.00 |
| ATOM | 1140 | CB   | PHE | 72 | 3.383 | 7.076  | 5.419 | 1.00 | 0.00 |
| ATOM | 1141 | HB2  | PHE | 72 | 4.270 | 6.982  | 4.793 | 1.00 | 0.00 |
| ATOM | 1142 | HB3  | PHE | 72 | 3.675 | 7.057  | 6.469 | 1.00 | 0.00 |
| ATOM | 1143 | CG   | PHE | 72 | 2.562 | 5.854  | 5.182 | 1.00 | 0.00 |
| ATOM | 1144 | CD1  | PHE | 72 | 2.300 | 5.428  | 3.862 | 1.00 | 0.00 |

|      |      |         |    |       |        |       |      |      |
|------|------|---------|----|-------|--------|-------|------|------|
| ATOM | 1145 | HD1 PHE | 72 | 2.715 | 5.982  | 3.020 | 1.00 | 0.00 |
| ATOM | 1146 | CE1 PHE | 72 | 1.517 | 4.310  | 3.636 | 1.00 | 0.00 |
| ATOM | 1147 | HE1 PHE | 72 | 1.279 | 4.034  | 2.608 | 1.00 | 0.00 |
| ATOM | 1148 | CZ PHE  | 72 | 1.038 | 3.548  | 4.684 | 1.00 | 0.00 |
| ATOM | 1149 | HZ PHE  | 72 | 0.463 | 2.641  | 4.499 | 1.00 | 0.00 |
| ATOM | 1150 | CE2 PHE | 72 | 1.304 | 3.962  | 6.018 | 1.00 | 0.00 |
| ATOM | 1151 | HE2 PHE | 72 | 0.893 | 3.404  | 6.859 | 1.00 | 0.00 |
| ATOM | 1152 | CD2 PHE | 72 | 2.089 | 5.080  | 6.246 | 1.00 | 0.00 |
| ATOM | 1153 | HD2 PHE | 72 | 2.346 | 5.367  | 7.265 | 1.00 | 0.00 |
| ATOM | 1154 | C PHE   | 72 | 1.249 | 8.335  | 5.865 | 1.00 | 0.00 |
| ATOM | 1155 | O PHE   | 72 | 0.208 | 8.322  | 5.265 | 1.00 | 0.00 |
| ATOM | 1156 | N GLN   | 73 | 1.290 | 8.478  | 7.209 | 1.00 | 0.00 |
| ATOM | 1157 | H GLN   | 73 | 2.102 | 7.978  | 7.540 | 1.00 | 0.00 |
| ATOM | 1158 | CA GLN  | 73 | 0.088 | 8.452  | 8.019 | 1.00 | 0.00 |
| ATOM | 1159 | HA GLN  | 73 | 0.556 | 8.663  | 8.980 | 1.00 | 0.00 |
| ATOM | 1160 | CB GLN  | 73 | 1.179 | 8.353  | 6.957 | 1.00 | 0.00 |
| ATOM | 1161 | HB2 GLN | 73 | 1.863 | 7.544  | 7.213 | 1.00 | 0.00 |
| ATOM | 1162 | HB3 GLN | 73 | 0.725 | 8.151  | 5.987 | 1.00 | 0.00 |
| ATOM | 1163 | CG GLN  | 73 | 1.948 | 9.668  | 6.894 | 1.00 | 0.00 |
| ATOM | 1164 | HG2 GLN | 73 | 1.265 | 10.477 | 6.638 | 1.00 | 0.00 |
| ATOM | 1165 | HG3 GLN | 73 | 2.403 | 9.870  | 7.864 | 1.00 | 0.00 |
| ATOM | 1166 | CD GLN  | 73 | 3.048 | 9.609  | 5.844 | 1.00 | 0.00 |

|      |      |      |     |    |        |        |       |      |      |
|------|------|------|-----|----|--------|--------|-------|------|------|
| ATOM | 1167 | OE1  | GLN | 73 | 3.222  | 8.591  | 5.179 | 1.00 | 0.00 |
| ATOM | 1168 | NE2  | GLN | 73 | 3.793  | 10.708 | 5.697 | 1.00 | 0.00 |
| ATOM | 1169 | HE21 | GLN | 73 | 4.537  | 10.722 | 5.013 | 1.00 | 0.00 |
| ATOM | 1170 | HE22 | GLN | 73 | 3.609  | 11.519 | 6.269 | 1.00 | 0.00 |
| ATOM | 1171 | C    | GLN | 73 | -0.825 | 9.635  | 7.646 | 1.00 | 0.00 |
| ATOM | 1172 | O    | GLN | 73 | -2.047 | 9.512  | 7.454 | 1.00 | 0.00 |
| ATOM | 1173 | N    | THR | 74 | -0.205 | 10.809 | 7.487 | 1.00 | 0.00 |
| ATOM | 1174 | H    | THR | 74 | 0.790  | 10.882 | 7.640 | 1.00 | 0.00 |
| ATOM | 1175 | CA   | THR | 74 | -0.930 | 12.000 | 7.154 | 1.00 | 0.00 |
| ATOM | 1176 | HA   | THR | 74 | -1.798 | 12.152 | 7.795 | 1.00 | 0.00 |
| ATOM | 1177 | CB   | THR | 74 | -0.021 | 13.236 | 7.256 | 1.00 | 0.00 |
| ATOM | 1178 | HB   | THR | 74 | 0.829  | 13.112 | 6.586 | 1.00 | 0.00 |
| ATOM | 1179 | CG2  | THR | 74 | -0.792 | 14.484 | 6.867 | 1.00 | 0.00 |
| ATOM | 1180 | HG21 | THR | 74 | -1.643 | 14.610 | 7.537 | 1.00 | 0.00 |
| ATOM | 1181 | HG22 | THR | 74 | -0.139 | 15.354 | 6.942 | 1.00 | 0.00 |
| ATOM | 1182 | HG23 | THR | 74 | -1.149 | 14.387 | 5.841 | 1.00 | 0.00 |
| ATOM | 1183 | OG1  | THR | 74 | 0.508  | 13.324 | 8.580 | 1.00 | 0.00 |
| ATOM | 1184 | HG1  | THR | 74 | 1.076  | 14.095 | 8.647 | 1.00 | 0.00 |
| ATOM | 1185 | C    | THR | 74 | -1.563 | 11.993 | 5.771 | 1.00 | 0.00 |
| ATOM | 1186 | O    | THR | 74 | -2.711 | 12.482 | 5.579 | 1.00 | 0.00 |
| ATOM | 1187 | N    | GLN | 75 | -0.880 | 11.348 | 4.804 | 1.00 | 0.00 |
| ATOM | 1188 | H    | GLN | 75 | 0.073  | 11.040 | 4.929 | 1.00 | 0.00 |

|      |      |      |     |    |        |        |       |      |      |
|------|------|------|-----|----|--------|--------|-------|------|------|
| ATOM | 1189 | CA   | GLN | 75 | -1.483 | 11.233 | 3.458 | 1.00 | 0.00 |
| ATOM | 1190 | HA   | GLN | 75 | -2.242 | 12.003 | 3.317 | 1.00 | 0.00 |
| ATOM | 1191 | CB   | GLN | 75 | -0.399 | 11.414 | 2.394 | 1.00 | 0.00 |
| ATOM | 1192 | HB2  | GLN | 75 | 0.321  | 10.609 | 2.536 | 1.00 | 0.00 |
| ATOM | 1193 | HB3  | GLN | 75 | -0.885 | 11.300 | 1.425 | 1.00 | 0.00 |
| ATOM | 1194 | CG   | GLN | 75 | 0.312  | 12.736 | 2.445 | 1.00 | 0.00 |
| ATOM | 1195 | HG2  | GLN | 75 | 0.886  | 12.770 | 3.371 | 1.00 | 0.00 |
| ATOM | 1196 | HG3  | GLN | 75 | 0.989  | 12.816 | 1.594 | 1.00 | 0.00 |
| ATOM | 1197 | CD   | GLN | 75 | -0.648 | 13.931 | 2.420 | 1.00 | 0.00 |
| ATOM | 1198 | OE1  | GLN | 75 | -1.670 | 13.903 | 1.746 | 1.00 | 0.00 |
| ATOM | 1199 | NE2  | GLN | 75 | -0.302 | 14.944 | 3.122 | 1.00 | 0.00 |
| ATOM | 1200 | HE21 | GLN | 75 | -0.893 | 15.763 | 3.147 | 1.00 | 0.00 |
| ATOM | 1201 | HE22 | GLN | 75 | 0.560  | 14.920 | 3.648 | 1.00 | 0.00 |
| ATOM | 1202 | C    | GLN | 75 | -2.307 | 9.940  | 3.281 | 1.00 | 0.00 |
| ATOM | 1203 | O    | GLN | 75 | -2.267 | 9.204  | 2.255 | 1.00 | 0.00 |
| ATOM | 1204 | N    | GLN | 76 | -3.140 | 9.666  | 4.276 | 1.00 | 0.00 |
| ATOM | 1205 | H    | GLN | 76 | -3.000 | 10.103 | 5.176 | 1.00 | 0.00 |
| ATOM | 1206 | CA   | GLN | 76 | -4.172 | 8.658  | 4.155 | 1.00 | 0.00 |
| ATOM | 1207 | HA   | GLN | 76 | -4.706 | 8.583  | 5.102 | 1.00 | 0.00 |
| ATOM | 1208 | CB   | GLN | 76 | -5.185 | 8.993  | 3.045 | 1.00 | 0.00 |
| ATOM | 1209 | HB2  | GLN | 76 | -4.850 | 8.413  | 2.185 | 1.00 | 0.00 |
| ATOM | 1210 | HB3  | GLN | 76 | -6.131 | 8.591  | 3.408 | 1.00 | 0.00 |

|      |      |      |     |    |        |        |       |      |      |
|------|------|------|-----|----|--------|--------|-------|------|------|
| ATOM | 1211 | CG   | GLN | 76 | -5.379 | 10.463 | 2.627 | 1.00 | 0.00 |
| ATOM | 1212 | HG2  | GLN | 76 | -4.444 | 10.827 | 2.202 | 1.00 | 0.00 |
| ATOM | 1213 | HG3  | GLN | 76 | -6.157 | 10.485 | 1.863 | 1.00 | 0.00 |
| ATOM | 1214 | CD   | GLN | 76 | -5.786 | 11.381 | 3.757 | 1.00 | 0.00 |
| ATOM | 1215 | OE1  | GLN | 76 | -5.167 | 12.425 | 3.987 | 1.00 | 0.00 |
| ATOM | 1216 | NE2  | GLN | 76 | -6.844 | 11.004 | 4.465 | 1.00 | 0.00 |
| ATOM | 1217 | HE21 | GLN | 76 | -7.164 | 11.577 | 5.233 | 1.00 | 0.00 |
| ATOM | 1218 | HE22 | GLN | 76 | -7.324 | 10.147 | 4.232 | 1.00 | 0.00 |
| ATOM | 1219 | C    | GLN | 76 | -3.529 | 7.289  | 3.974 | 1.00 | 0.00 |
| ATOM | 1220 | O    | GLN | 76 | -4.116 | 6.403  | 3.349 | 1.00 | 0.00 |
| ATOM | 1221 | N    | ARG | 77 | -2.333 | 7.086  | 4.516 | 1.00 | 0.00 |
| ATOM | 1222 | H    | ARG | 77 | -3.090 | 7.159  | 5.181 | 1.00 | 0.00 |
| ATOM | 1223 | CA   | ARG | 77 | -1.644 | 5.817  | 4.396 | 1.00 | 0.00 |
| ATOM | 1224 | HA   | ARG | 77 | -2.571 | 6.385  | 4.481 | 1.00 | 0.00 |
| ATOM | 1225 | CB   | ARG | 77 | -0.483 | 6.716  | 4.809 | 1.00 | 0.00 |
| ATOM | 1226 | HB2  | ARG | 77 | -0.620 | 7.037  | 5.842 | 1.00 | 0.00 |
| ATOM | 1227 | HB3  | ARG | 77 | 0.453  | 6.165  | 4.721 | 1.00 | 0.00 |
| ATOM | 1228 | CG   | ARG | 77 | -0.440 | 7.940  | 3.899 | 1.00 | 0.00 |
| ATOM | 1229 | HG2  | ARG | 77 | -0.302 | 7.620  | 2.866 | 1.00 | 0.00 |
| ATOM | 1230 | HG3  | ARG | 77 | -1.375 | 8.492  | 3.987 | 1.00 | 0.00 |
| ATOM | 1231 | CD   | ARG | 77 | 0.721  | 8.839  | 4.312 | 1.00 | 0.00 |
| ATOM | 1232 | HD2  | ARG | 77 | 0.584  | 9.159  | 5.345 | 1.00 | 0.00 |

|      |      |      |     |    |        |        |        |      |      |
|------|------|------|-----|----|--------|--------|--------|------|------|
| ATOM | 1233 | HD3  | ARG | 77 | 1.657  | 8.287  | 4.224  | 1.00 | 0.00 |
| ATOM | 1234 | NE   | ARG | 77 | 0.795  | 10.039 | 3.449  | 1.00 | 0.00 |
| ATOM | 1235 | HE   | ARG | 77 | 0.112  | 10.146 | 2.712  | 1.00 | 0.00 |
| ATOM | 1236 | CZ   | ARG | 77 | 1.719  | 10.984 | 3.600  | 1.00 | 0.00 |
| ATOM | 1237 | NH1  | ARG | 77 | 2.651  | 10.914 | 4.546  | 1.00 | 0.00 |
| ATOM | 1238 | HH11 | ARG | 77 | 2.668  | 10.124 | 5.176  | 1.00 | 0.00 |
| ATOM | 1239 | HH12 | ARG | 77 | 3.337  | 11.650 | 4.631  | 1.00 | 0.00 |
| ATOM | 1240 | NH2  | ARG | 77 | 1.693  | 12.021 | 2.768  | 1.00 | 0.00 |
| ATOM | 1241 | HH21 | ARG | 77 | 0.984  | 12.071 | 2.050  | 1.00 | 0.00 |
| ATOM | 1242 | HH22 | ARG | 77 | 2.382  | 12.754 | 2.858  | 1.00 | 0.00 |
| ATOM | 1243 | C    | ARG | 77 | -1.440 | 5.435  | 2.944  | 1.00 | 0.00 |
| ATOM | 1244 | O    | ARG | 77 | -1.358 | 4.262  | 2.602  | 1.00 | 0.00 |
| ATOM | 1245 | N    | LEU | 78 | -1.375 | 6.452  | 2.088  | 1.00 | 0.00 |
| ATOM | 1246 | H    | LEU | 78 | -1.420 | 7.408  | 2.411  | 1.00 | 0.00 |
| ATOM | 1247 | CA   | LEU | 78 | -1.375 | 6.195  | 0.578  | 1.00 | 0.00 |
| ATOM | 1248 | HA   | LEU | 78 | -1.705 | 7.092  | 0.053  | 1.00 | 0.00 |
| ATOM | 1249 | CB   | LEU | 78 | 0.018  | 5.835  | 0.095  | 1.00 | 0.00 |
| ATOM | 1250 | HB2  | LEU | 78 | 0.181  | 4.891  | 0.614  | 1.00 | 0.00 |
| ATOM | 1251 | HB3  | LEU | 78 | -0.026 | 5.655  | -0.979 | 1.00 | 0.00 |
| ATOM | 1252 | CG   | LEU | 78 | 1.165  | 6.789  | 0.403  | 1.00 | 0.00 |
| ATOM | 1253 | HG   | LEU | 78 | 1.274  | 6.874  | 1.484  | 1.00 | 0.00 |
| ATOM | 1254 | CD1  | LEU | 78 | 2.453  | 6.278  | -0.194 | 1.00 | 0.00 |

|      |      |      |     |    |        |       |        |      |      |
|------|------|------|-----|----|--------|-------|--------|------|------|
| ATOM | 1255 | HD11 | LEU | 78 | 2.344  | 6.193 | -1.275 | 1.00 | 0.00 |
| ATOM | 1256 | HD12 | LEU | 78 | 3.261  | 6.972 | 0.036  | 1.00 | 0.00 |
| ATOM | 1257 | HD13 | LEU | 78 | 2.685  | 5.299 | 0.225  | 1.00 | 0.00 |
| ATOM | 1258 | CD2  | LEU | 78 | 0.799  | 8.222 | -0.086 | 1.00 | 0.00 |
| ATOM | 1259 | HD21 | LEU | 78 | -0.102 | 8.562 | 0.425  | 1.00 | 0.00 |
| ATOM | 1260 | HD22 | LEU | 78 | 1.621  | 8.903 | 0.135  | 1.00 | 0.00 |
| ATOM | 1261 | HD23 | LEU | 78 | 0.621  | 8.206 | -1.162 | 1.00 | 0.00 |
| ATOM | 1262 | C    | LEU | 78 | -2.411 | 5.160 | 0.203  | 1.00 | 0.00 |
| ATOM | 1263 | O    | LEU | 78 | -2.195 | 4.244 | -0.651 | 1.00 | 0.00 |
| ATOM | 1264 | N    | ARG | 79 | -3.614 | 5.288 | 0.796  | 1.00 | 0.00 |
| ATOM | 1265 | H    | ARG | 79 | -3.807 | 6.060 | 1.419  | 1.00 | 0.00 |
| ATOM | 1266 | CA   | ARG | 79 | -4.656 | 4.290 | 0.589  | 1.00 | 0.00 |
| ATOM | 1267 | HA   | ARG | 79 | -4.327 | 3.318 | 0.956  | 1.00 | 0.00 |
| ATOM | 1268 | CB   | ARG | 79 | -5.911 | 4.698 | 1.351  | 1.00 | 0.00 |
| ATOM | 1269 | HB2  | ARG | 79 | -5.583 | 5.108 | 2.306  | 1.00 | 0.00 |
| ATOM | 1270 | HB3  | ARG | 79 | -6.396 | 5.481 | 0.767  | 1.00 | 0.00 |
| ATOM | 1271 | CG   | ARG | 79 | -6.886 | 3.579 | 1.595  | 1.00 | 0.00 |
| ATOM | 1272 | HG2  | ARG | 79 | -7.325 | 3.262 | 0.649  | 1.00 | 0.00 |
| ATOM | 1273 | HG3  | ARG | 79 | -6.371 | 2.737 | 2.056  | 1.00 | 0.00 |
| ATOM | 1274 | CD   | ARG | 79 | -8.000 | 4.077 | 2.537  | 1.00 | 0.00 |
| ATOM | 1275 | HD2  | ARG | 79 | -8.712 | 4.684 | 1.977  | 1.00 | 0.00 |
| ATOM | 1276 | HD3  | ARG | 79 | -8.518 | 3.225 | 2.977  | 1.00 | 0.00 |

|      |      |      |     |    |        |       |        |      |      |
|------|------|------|-----|----|--------|-------|--------|------|------|
| ATOM | 1277 | NE   | ARG | 79 | -7.429 | 4.900 | 3.627  | 1.00 | 0.00 |
| ATOM | 1278 | HE   | ARG | 79 | -6.573 | 4.540 | 4.024  | 1.00 | 0.00 |
| ATOM | 1279 | CZ   | ARG | 79 | -7.931 | 6.045 | 4.118  | 1.00 | 0.00 |
| ATOM | 1280 | NH1  | ARG | 79 | -9.071 | 6.571 | 3.655  | 1.00 | 0.00 |
| ATOM | 1281 | HH11 | ARG | 79 | -9.577 | 6.103 | 2.916  | 1.00 | 0.00 |
| ATOM | 1282 | HH12 | ARG | 79 | -9.421 | 7.434 | 4.046  | 1.00 | 0.00 |
| ATOM | 1283 | NH2  | ARG | 79 | -7.279 | 6.682 | 5.097  | 1.00 | 0.00 |
| ATOM | 1284 | HH21 | ARG | 79 | -6.418 | 6.299 | 5.458  | 1.00 | 0.00 |
| ATOM | 1285 | HH22 | ARG | 79 | -7.652 | 7.544 | 5.470  | 1.00 | 0.00 |
| ATOM | 1286 | C    | ARG | 79 | -5.018 | 4.075 | -0.881 | 1.00 | 0.00 |
| ATOM | 1287 | O    | ARG | 79 | -5.174 | 2.991 | -1.316 | 1.00 | 0.00 |
| ATOM | 1288 | N    | ALA | 80 | -4.996 | 5.119 | -1.697 | 1.00 | 0.00 |
| ATOM | 1289 | H    | ALA | 80 | -4.859 | 6.071 | -1.390 | 1.00 | 0.00 |
| ATOM | 1290 | CA   | ALA | 80 | -5.239 | 4.880 | -3.108 | 1.00 | 0.00 |
| ATOM | 1291 | HA   | ALA | 80 | -6.128 | 4.253 | -3.184 | 1.00 | 0.00 |
| ATOM | 1292 | CB   | ALA | 80 | -5.505 | 6.193 | -3.839 | 1.00 | 0.00 |
| ATOM | 1293 | HB1  | ALA | 80 | -4.621 | 6.828 | -3.780 | 1.00 | 0.00 |
| ATOM | 1294 | HB2  | ALA | 80 | -5.735 | 5.988 | -4.885 | 1.00 | 0.00 |
| ATOM | 1295 | HB3  | ALA | 80 | -6.350 | 6.703 | -3.376 | 1.00 | 0.00 |
| ATOM | 1296 | C    | ALA | 80 | -4.101 | 4.163 | -3.787 | 1.00 | 0.00 |
| ATOM | 1297 | O    | ALA | 80 | -4.378 | 3.340 | -4.696 | 1.00 | 0.00 |
| ATOM | 1298 | N    | CYX | 81 | -2.856 | 4.368 | -3.390 | 1.00 | 0.00 |



|      |      |     |     |    |        |        |        |      |      |
|------|------|-----|-----|----|--------|--------|--------|------|------|
| ATOM | 1299 | H   | CYX | 81 | -2.664 | 5.046  | -2.666 | 1.00 | 0.00 |
| ATOM | 1300 | CA  | CYX | 81 | -1.742 | 3.643  | -3.965 | 1.00 | 0.00 |
| ATOM | 1301 | HA  | CYX | 81 | -1.814 | 3.731  | -5.049 | 1.00 | 0.00 |
| ATOM | 1302 | CB  | CYX | 81 | -0.407 | 4.122  | -3.539 | 1.00 | 0.00 |
| ATOM | 1303 | HB2 | CYX | 81 | -0.299 | 3.988  | -2.463 | 1.00 | 0.00 |
| ATOM | 1304 | HB3 | CYX | 81 | 0.365  | 3.553  | -4.056 | 1.00 | 0.00 |
| ATOM | 1305 | SG  | CYX | 81 | -0.263 | 5.951  | -3.957 | 1.00 | 0.00 |
| ATOM | 1306 | C   | CYX | 81 | -1.834 | 2.164  | -3.560 | 1.00 | 0.00 |
| ATOM | 1307 | O   | CYX | 81 | -1.532 | 1.280  | -4.286 | 1.00 | 0.00 |
| ATOM | 1308 | N   | GLN | 82 | -2.322 | 1.965  | -2.315 | 1.00 | 0.00 |
| ATOM | 1309 | H   | GLN | 82 | -2.539 | 2.707  | -1.665 | 1.00 | 0.00 |
| ATOM | 1310 | CA  | GLN | 82 | -2.509 | 0.578  | -1.876 | 1.00 | 0.00 |
| ATOM | 1311 | HA  | GLN | 82 | -1.556 | 0.053  | -1.937 | 1.00 | 0.00 |
| ATOM | 1312 | CB  | GLN | 82 | -3.019 | 0.501  | -0.433 | 1.00 | 0.00 |
| ATOM | 1313 | HB2 | GLN | 82 | -3.939 | 1.085  | -0.403 | 1.00 | 0.00 |
| ATOM | 1314 | HB3 | GLN | 82 | -3.249 | -0.548 | -0.246 | 1.00 | 0.00 |
| ATOM | 1315 | CG  | GLN | 82 | -2.077 | 1.000  | 0.616  | 1.00 | 0.00 |
| ATOM | 1316 | HG2 | GLN | 82 | -1.157 | 0.417  | 0.601  | 1.00 | 0.00 |
| ATOM | 1317 | HG3 | GLN | 82 | -1.841 | 2.055  | 0.471  | 1.00 | 0.00 |
| ATOM | 1318 | CD  | GLN | 82 | -2.738 | 0.832  | 1.978  | 1.00 | 0.00 |
| ATOM | 1319 | OE1 | GLN | 82 | -3.350 | -0.195 | 2.226  | 1.00 | 0.00 |
| ATOM | 1320 | NE2 | GLN | 82 | -2.631 | 1.830  | 2.840  | 1.00 | 0.00 |

|      |      |      |     |    |         |        |        |      |      |
|------|------|------|-----|----|---------|--------|--------|------|------|
| ATOM | 1321 | HE21 | GLN | 82 | -3.057  | 1.753  | 3.752  | 1.00 | 0.00 |
| ATOM | 1322 | HE22 | GLN | 82 | -2.124  | 2.665  | 2.581  | 1.00 | 0.00 |
| ATOM | 1323 | C    | GLN | 82 | -3.479  | -0.113 | -2.789 | 1.00 | 0.00 |
| ATOM | 1324 | O    | GLN | 82 | -3.183  | -1.252 | -3.159 | 1.00 | 0.00 |
| ATOM | 1325 | N    | ARG | 83 | -4.548  | 0.547  | -3.196 | 1.00 | 0.00 |
| ATOM | 1326 | H    | ARG | 83 | -4.723  | 1.430  | -2.737 | 1.00 | 0.00 |
| ATOM | 1327 | CA   | ARG | 83 | -5.528  | 0.058  | -4.129 | 1.00 | 0.00 |
| ATOM | 1328 | HA   | ARG | 83 | -5.867  | -0.925 | -3.804 | 1.00 | 0.00 |
| ATOM | 1329 | CB   | ARG | 83 | -6.719  | 0.966  | -4.229 | 1.00 | 0.00 |
| ATOM | 1330 | HB2  | ARG | 83 | -6.281  | 1.944  | -4.432 | 1.00 | 0.00 |
| ATOM | 1331 | HB3  | ARG | 83 | -7.240  | 0.611  | -5.119 | 1.00 | 0.00 |
| ATOM | 1332 | CG   | ARG | 83 | -7.708  | 1.082  | -3.074 | 1.00 | 0.00 |
| ATOM | 1333 | HG2  | ARG | 83 | -8.050  | 0.082  | -2.808 | 1.00 | 0.00 |
| ATOM | 1334 | HG3  | ARG | 83 | -7.196  | 1.530  | -2.222 | 1.00 | 0.00 |
| ATOM | 1335 | CD   | ARG | 83 | -8.920  | 1.953  | -3.460 | 1.00 | 0.00 |
| ATOM | 1336 | HD2  | ARG | 83 | -8.663  | 2.573  | -4.319 | 1.00 | 0.00 |
| ATOM | 1337 | HD3  | ARG | 83 | -9.763  | 1.311  | -3.716 | 1.00 | 0.00 |
| ATOM | 1338 | NE   | ARG | 83 | -9.317  | 2.832  | -2.345 | 1.00 | 0.00 |
| ATOM | 1339 | HE   | ARG | 83 | -9.124  | 3.817  | -2.462 | 1.00 | 0.00 |
| ATOM | 1340 | CZ   | ARG | 83 | -9.916  | 2.428  | -1.217 | 1.00 | 0.00 |
| ATOM | 1341 | NH1  | ARG | 83 | -10.213 | 1.143  | -1.012 | 1.00 | 0.00 |
| ATOM | 1342 | HH11 | ARG | 83 | -9.985  | 0.457  | -1.717 | 1.00 | 0.00 |

|      |      |      |     |    |         |        |        |      |      |
|------|------|------|-----|----|---------|--------|--------|------|------|
| ATOM | 1343 | HH12 | ARG | 83 | -10.665 | 0.863  | -0.153 | 1.00 | 0.00 |
| ATOM | 1344 | NH2  | ARG | 83 | -10.214 | 3.318  | -0.266 | 1.00 | 0.00 |
| ATOM | 1345 | HH21 | ARG | 83 | -9.987  | 4.293  | -0.402 | 1.00 | 0.00 |
| ATOM | 1346 | HH22 | ARG | 83 | -10.666 | 3.012  | 0.584  | 1.00 | 0.00 |
| ATOM | 1347 | C    | ARG | 83 | -4.916  | -0.230 | -5.533 | 1.00 | 0.00 |
| ATOM | 1348 | O    | ARG | 83 | -5.107  | -1.303 | -6.110 | 1.00 | 0.00 |
| ATOM | 1349 | N    | VAL | 84 | -4.079  | 0.695  | -5.988 | 1.00 | 0.00 |
| ATOM | 1350 | H    | VAL | 84 | -4.043  | 1.609  | -5.559 | 1.00 | 0.00 |
| ATOM | 1351 | CA   | VAL | 84 | -3.332  | 0.480  | -7.214 | 1.00 | 0.00 |
| ATOM | 1352 | HA   | VAL | 84 | -4.007  | 0.213  | -8.028 | 1.00 | 0.00 |
| ATOM | 1353 | CB   | VAL | 84 | -2.534  | 1.727  | -7.627 | 1.00 | 0.00 |
| ATOM | 1354 | HB   | VAL | 84 | -1.928  | 2.027  | -6.773 | 1.00 | 0.00 |
| ATOM | 1355 | CG1  | VAL | 84 | -1.622  | 1.492  | -8.847 | 1.00 | 0.00 |
| ATOM | 1356 | HG11 | VAL | 84 | -2.228  | 1.193  | -9.702 | 1.00 | 0.00 |
| ATOM | 1357 | HG12 | VAL | 84 | -1.088  | 2.412  | -9.085 | 1.00 | 0.00 |
| ATOM | 1358 | HG13 | VAL | 84 | -0.904  | 0.705  | -8.618 | 1.00 | 0.00 |
| ATOM | 1359 | CG2  | VAL | 84 | -3.549  | 2.822  | -7.932 | 1.00 | 0.00 |
| ATOM | 1360 | HG21 | VAL | 84 | -4.146  | 3.023  | -7.042 | 1.00 | 0.00 |
| ATOM | 1361 | HG22 | VAL | 84 | -3.026  | 3.731  | -8.231 | 1.00 | 0.00 |
| ATOM | 1362 | HG23 | VAL | 84 | -4.203  | 2.497  | -8.742 | 1.00 | 0.00 |
| ATOM | 1363 | C    | VAL | 84 | -2.492  | -0.757 | -7.149 | 1.00 | 0.00 |
| ATOM | 1364 | O    | VAL | 84 | -2.372  | -1.568 | -8.097 | 1.00 | 0.00 |

|      |      |      |     |    |        |        |        |      |      |
|------|------|------|-----|----|--------|--------|--------|------|------|
| ATOM | 1365 | N    | ILE | 85 | -1.707 | -0.885 | -6.081 | 1.00 | 0.00 |
| ATOM | 1366 | H    | ILE | 85 | -1.792 | -0.230 | -5.316 | 1.00 | 0.00 |
| ATOM | 1367 | CA   | ILE | 85 | -0.754 | -1.960 | -5.959 | 1.00 | 0.00 |
| ATOM | 1368 | HA   | ILE | 85 | -0.047 | -1.993 | -6.788 | 1.00 | 0.00 |
| ATOM | 1369 | CB   | ILE | 85 | 0.017  | -1.796 | -4.632 | 1.00 | 0.00 |
| ATOM | 1370 | HB   | ILE | 85 | -0.688 | -1.483 | -3.862 | 1.00 | 0.00 |
| ATOM | 1371 | CG2  | ILE | 85 | 0.687  | -3.087 | -4.209 | 1.00 | 0.00 |
| ATOM | 1372 | HG21 | ILE | 85 | 1.392  | -3.400 | -4.979 | 1.00 | 0.00 |
| ATOM | 1373 | HG22 | ILE | 85 | 1.219  | -2.930 | -3.271 | 1.00 | 0.00 |
| ATOM | 1374 | HG23 | ILE | 85 | -0.068 | -3.861 | -4.073 | 1.00 | 0.00 |
| ATOM | 1375 | CG1  | ILE | 85 | 1.016  | -0.702 | -4.731 | 1.00 | 0.00 |
| ATOM | 1376 | HG12 | ILE | 85 | 1.920  | -1.118 | -5.175 | 1.00 | 0.00 |
| ATOM | 1377 | HG13 | ILE | 85 | 0.606  | 0.063  | -5.391 | 1.00 | 0.00 |
| ATOM | 1378 | CD1  | ILE | 85 | 1.347  | -0.090 | -3.403 | 1.00 | 0.00 |
| ATOM | 1379 | HD11 | ILE | 85 | 1.757  | -0.854 | -2.743 | 1.00 | 0.00 |
| ATOM | 1380 | HD12 | ILE | 85 | 2.082  | 0.703  | -3.541 | 1.00 | 0.00 |
| ATOM | 1381 | HD13 | ILE | 85 | 0.443  | 0.327  | -2.959 | 1.00 | 0.00 |
| ATOM | 1382 | C    | ILE | 85 | -1.608 | -3.276 | -5.930 | 1.00 | 0.00 |
| ATOM | 1383 | O    | ILE | 85 | -1.195 | -4.226 | -6.581 | 1.00 | 0.00 |
| ATOM | 1384 | N    | GLN | 86 | -2.709 | -3.311 | -5.234 | 1.00 | 0.00 |
| ATOM | 1385 | H    | GLN | 86 | -2.983 | -2.524 | -4.663 | 1.00 | 0.00 |
| ATOM | 1386 | CA   | GLN | 86 | -3.567 | -4.546 | -5.205 | 1.00 | 0.00 |

|      |      |      |     |    |        |        |         |      |      |
|------|------|------|-----|----|--------|--------|---------|------|------|
| ATOM | 1387 | HA   | GLN | 86 | -2.969 | -5.418 | -4.942  | 1.00 | 0.00 |
| ATOM | 1388 | CB   | GLN | 86 | -4.639 | -4.378 | -4.182  | 1.00 | 0.00 |
| ATOM | 1389 | HB2  | GLN | 86 | -5.116 | -3.409 | -4.335  | 1.00 | 0.00 |
| ATOM | 1390 | HB3  | GLN | 86 | -5.376 | -5.170 | -4.318  | 1.00 | 0.00 |
| ATOM | 1391 | CG   | GLN | 86 | -4.067 | -4.449 | -2.756  | 1.00 | 0.00 |
| ATOM | 1392 | HG2  | GLN | 86 | -3.337 | -5.239 | -2.584  | 1.00 | 0.00 |
| ATOM | 1393 | HG3  | GLN | 86 | -3.601 | -3.479 | -2.583  | 1.00 | 0.00 |
| ATOM | 1394 | CD   | GLN | 86 | -5.213 | -4.621 | -1.767  | 1.00 | 0.00 |
| ATOM | 1395 | OE1  | GLN | 86 | -5.757 | -3.641 | -1.197  | 1.00 | 0.00 |
| ATOM | 1396 | NE2  | GLN | 86 | -5.673 | -5.857 | -1.651  | 1.00 | 0.00 |
| ATOM | 1397 | HE21 | GLN | 86 | -6.433 | -6.052 | -1.015  | 1.00 | 0.00 |
| ATOM | 1398 | HE22 | GLN | 86 | -5.262 | -6.599 | -2.199  | 1.00 | 0.00 |
| ATOM | 1399 | C    | GLN | 86 | -4.162 | -4.832 | -6.600  | 1.00 | 0.00 |
| ATOM | 1400 | O    | GLN | 86 | -4.147 | -5.949 | -7.047  | 1.00 | 0.00 |
| ATOM | 1401 | N    | ARG | 87 | -4.605 | -3.777 | -7.263  | 1.00 | 0.00 |
| ATOM | 1402 | H    | ARG | 87 | -4.524 | -2.861 | -6.844  | 1.00 | 0.00 |
| ATOM | 1403 | CA   | ARG | 87 | -5.228 | -3.884 | -8.641  | 1.00 | 0.00 |
| ATOM | 1404 | HA   | ARG | 87 | -6.194 | -4.388 | -8.602  | 1.00 | 0.00 |
| ATOM | 1405 | CB   | ARG | 87 | -5.439 | -2.474 | -9.152  | 1.00 | 0.00 |
| ATOM | 1406 | HB2  | ARG | 87 | -6.269 | -2.028 | -8.604  | 1.00 | 0.00 |
| ATOM | 1407 | HB3  | ARG | 87 | -4.532 | -1.899 | -8.967  | 1.00 | 0.00 |
| ATOM | 1408 | CG   | ARG | 87 | -5.753 | -2.462 | -10.649 | 1.00 | 0.00 |

|      |      |          |    |        |        |         |      |      |
|------|------|----------|----|--------|--------|---------|------|------|
| ATOM | 1409 | HG2 ARG  | 87 | -4.950 | -2.942 | -11.208 | 1.00 | 0.00 |
| ATOM | 1410 | HG3 ARG  | 87 | -6.691 | -2.982 | -10.843 | 1.00 | 0.00 |
| ATOM | 1411 | CD ARG   | 87 | -5.877 | -1.034 | -11.082 | 1.00 | 0.00 |
| ATOM | 1412 | HD2 ARG  | 87 | -5.061 | -0.443 | -10.666 | 1.00 | 0.00 |
| ATOM | 1413 | HD3 ARG  | 87 | -5.855 | -0.968 | -12.170 | 1.00 | 0.00 |
| ATOM | 1414 | NE ARG   | 87 | -7.132 | -0.487 | -10.610 | 1.00 | 0.00 |
| ATOM | 1415 | HE ARG   | 87 | -7.817 | -1.116 | -10.217 | 1.00 | 0.00 |
| ATOM | 1416 | CZ ARG   | 87 | -7.395 | 0.836  | -10.603 | 1.00 | 0.00 |
| ATOM | 1417 | NH1 ARG  | 87 | -6.515 | 1.716  | -11.062 | 1.00 | 0.00 |
| ATOM | 1418 | HH11 ARG | 87 | -5.629 | 1.397  | -11.426 | 1.00 | 0.00 |
| ATOM | 1419 | HH12 ARG | 87 | -6.736 | 2.702  | -11.046 | 1.00 | 0.00 |
| ATOM | 1420 | NH2 ARG  | 87 | -8.626 | 1.264  | -10.186 | 1.00 | 0.00 |
| ATOM | 1421 | HH21 ARG | 87 | -9.318 | 0.591  | -9.891  | 1.00 | 0.00 |
| ATOM | 1422 | HH22 ARG | 87 | -8.837 | 2.252  | -10.176 | 1.00 | 0.00 |
| ATOM | 1423 | C ARG    | 87 | -4.314 | -4.635 | -9.582  | 1.00 | 0.00 |
| ATOM | 1424 | O ARG    | 87 | -4.752 | -5.528 | -10.271 | 1.00 | 0.00 |
| ATOM | 1425 | N TRP    | 88 | -3.010 | -4.342 | -9.598  | 1.00 | 0.00 |
| ATOM | 1426 | H TRP    | 88 | -2.709 | -3.599 | -8.984  | 1.00 | 0.00 |
| ATOM | 1427 | CA TRP   | 88 | -2.032 | -4.924 | -10.513 | 1.00 | 0.00 |
| ATOM | 1428 | HA TRP   | 88 | -2.532 | -5.315 | -11.399 | 1.00 | 0.00 |
| ATOM | 1429 | CB TRP   | 88 | -1.050 | -3.869 | -10.942 | 1.00 | 0.00 |
| ATOM | 1430 | HB2 TRP  | 88 | -0.765 | -3.330 | -10.039 | 1.00 | 0.00 |

|      |      |         |    |        |        |         |      |      |
|------|------|---------|----|--------|--------|---------|------|------|
| ATOM | 1431 | HB3 TRP | 88 | -0.153 | -4.196 | -11.468 | 1.00 | 0.00 |
| ATOM | 1432 | CG TRP  | 88 | -1.739 | -2.869 | -11.843 | 1.00 | 0.00 |
| ATOM | 1433 | CD1 TRP | 88 | -2.253 | -1.639 | -11.523 | 1.00 | 0.00 |
| ATOM | 1434 | HD1 TRP | 88 | -2.093 | -1.280 | -10.507 | 1.00 | 0.00 |
| ATOM | 1435 | NE1 TRP | 88 | -2.874 | -1.118 | -12.587 | 1.00 | 0.00 |
| ATOM | 1436 | HE1 TRP | 88 | -3.259 | -0.185 | -12.635 | 1.00 | 0.00 |
| ATOM | 1437 | CE2 TRP | 88 | -2.825 | -2.019 | -13.630 | 1.00 | 0.00 |
| ATOM | 1438 | CZ2 TRP | 88 | -3.304 | -1.924 | -14.944 | 1.00 | 0.00 |
| ATOM | 1439 | HZ2 TRP | 88 | -3.804 | -1.011 | -15.270 | 1.00 | 0.00 |
| ATOM | 1440 | CH2 TRP | 88 | -3.110 | -2.984 | -15.723 | 1.00 | 0.00 |
| ATOM | 1441 | HH2 TRP | 88 | -3.552 | -2.974 | -16.720 | 1.00 | 0.00 |
| ATOM | 1442 | CZ3 TRP | 88 | -2.379 | -4.087 | -15.325 | 1.00 | 0.00 |
| ATOM | 1443 | HZ3 TRP | 88 | -2.182 | -4.916 | -16.004 | 1.00 | 0.00 |
| ATOM | 1444 | CE3 TRP | 88 | -1.886 | -4.164 | -14.071 | 1.00 | 0.00 |
| ATOM | 1445 | HE3 TRP | 88 | -1.357 | -5.071 | -13.778 | 1.00 | 0.00 |
| ATOM | 1446 | CD2 TRP | 88 | -2.102 | -3.107 | -13.208 | 1.00 | 0.00 |
| ATOM | 1447 | C TRP   | 88 | -1.320 | -6.137 | -10.008 | 1.00 | 0.00 |
| ATOM | 1448 | O TRP   | 88 | -0.483 | -6.640 | -10.706 | 1.00 | 0.00 |
| ATOM | 1449 | N SER   | 89 | -1.806 | -6.649 | -8.896  | 1.00 | 0.00 |
| ATOM | 1450 | H SER   | 89 | -2.580 | -6.160 | -8.469  | 1.00 | 0.00 |
| ATOM | 1451 | CA SER  | 89 | -1.250 | -7.801 | -8.202  | 1.00 | 0.00 |
| ATOM | 1452 | HA SER  | 89 | -0.401 | -8.213 | -8.747  | 1.00 | 0.00 |

|      |      |      |     |    |        |         |         |      |      |
|------|------|------|-----|----|--------|---------|---------|------|------|
| ATOM | 1453 | CB   | SER | 89 | -0.761 | -7.330  | -6.800  | 1.00 | 0.00 |
| ATOM | 1454 | HB2  | SER | 89 | -1.560 | -6.815  | -6.267  | 1.00 | 0.00 |
| ATOM | 1455 | HB3  | SER | 89 | -0.417 | -8.177  | -6.208  | 1.00 | 0.00 |
| ATOM | 1456 | OG   | SER | 89 | 0.327  | -6.426  | -7.016  | 1.00 | 0.00 |
| ATOM | 1457 | HG   | SER | 89 | 0.656  | -6.113  | -6.170  | 1.00 | 0.00 |
| ATOM | 1458 | C    | SER | 89 | -2.217 | -8.947  | -8.110  | 1.00 | 0.00 |
| ATOM | 1459 | O    | SER | 89 | -1.958 | -9.867  | -7.387  | 1.00 | 0.00 |
| ATOM | 1460 | N    | GLN | 90 | -3.326 | -8.907  | -8.825  | 1.00 | 0.00 |
| ATOM | 1461 | H    | GLN | 90 | -3.538 | -8.111  | -9.410  | 1.00 | 0.00 |
| ATOM | 1462 | CA   | GLN | 90 | -4.324 | -9.997  | -8.735  | 1.00 | 0.00 |
| ATOM | 1463 | HA   | GLN | 90 | -4.582 | -10.164 | -7.689  | 1.00 | 0.00 |
| ATOM | 1464 | CB   | GLN | 90 | -5.612 | -9.649  | -9.511  | 1.00 | 0.00 |
| ATOM | 1465 | HB2  | GLN | 90 | -5.430 | -9.934  | -10.547 | 1.00 | 0.00 |
| ATOM | 1466 | HB3  | GLN | 90 | -6.398 | -10.278 | -9.094  | 1.00 | 0.00 |
| ATOM | 1467 | CG   | GLN | 90 | -6.050 | -8.181  | -9.455  | 1.00 | 0.00 |
| ATOM | 1468 | HG2  | GLN | 90 | -5.748 | -7.795  | -8.481  | 1.00 | 0.00 |
| ATOM | 1469 | HG3  | GLN | 90 | -5.504 | -7.656  | -10.239 | 1.00 | 0.00 |
| ATOM | 1470 | CD   | GLN | 90 | -7.525 | -7.922  | -9.639  | 1.00 | 0.00 |
| ATOM | 1471 | OE1  | GLN | 90 | -8.323 | -8.843  | -9.840  | 1.00 | 0.00 |
| ATOM | 1472 | NE2  | GLN | 90 | -7.904 | -6.638  | -9.570  | 1.00 | 0.00 |
| ATOM | 1473 | HE21 | GLN | 90 | -8.878 | -6.395  | -9.685  | 1.00 | 0.00 |
| ATOM | 1474 | HE22 | GLN | 90 | -7.214 | -5.919  | -9.404  | 1.00 | 0.00 |



|      |      |     |     |    |        |         |         |      |      |
|------|------|-----|-----|----|--------|---------|---------|------|------|
| ATOM | 1475 | C   | GLN | 90 | -3.750 | -11.341 | -9.249  | 1.00 | 0.00 |
| ATOM | 1476 | O   | GLN | 90 | -3.744 | -12.359 | -8.533  | 1.00 | 0.00 |
| ATOM | 1477 | OXT | GLN | 90 | -3.291 | -11.403 | -10.387 | 1.00 | 0.00 |
| TER  |      |     |     |    |        |         |         |      |      |
| ATOM | 1478 | S1  | LIG | 91 | 22.364 | -10.998 | -6.886  | 1.00 | 0.00 |
| ATOM | 1479 | S2  | LIG | 91 | 19.678 | -15.724 | -1.340  | 1.00 | 0.00 |
| ATOM | 1480 | O1  | LIG | 91 | 16.789 | -11.635 | -2.854  | 1.00 | 0.00 |
| ATOM | 1481 | H5  | LIG | 91 | 16.250 | -12.122 | -2.196  | 1.00 | 0.00 |
| ATOM | 1482 | O2  | LIG | 91 | 23.006 | -9.578  | -6.503  | 1.00 | 0.00 |
| ATOM | 1483 | H6  | LIG | 91 | 22.242 | -8.937  | -6.621  | 1.00 | 0.00 |
| ATOM | 1484 | O3  | LIG | 91 | 18.506 | -16.766 | -1.690  | 1.00 | 0.00 |
| ATOM | 1485 | H7  | LIG | 91 | 17.671 | -16.298 | -1.398  | 1.00 | 0.00 |
| ATOM | 1486 | O4  | LIG | 91 | 23.376 | -12.000 | -6.619  | 1.00 | 0.00 |
| ATOM | 1487 | O5  | LIG | 91 | 21.714 | -10.917 | -8.186  | 1.00 | 0.00 |
| ATOM | 1488 | O6  | LIG | 91 | 20.912 | -16.295 | -1.840  | 1.00 | 0.00 |
| ATOM | 1489 | O7  | LIG | 91 | 19.554 | -15.292 | 0.044   | 1.00 | 0.00 |
| ATOM | 1490 | O8  | LIG | 91 | 18.077 | -3.761  | -10.127 | 1.00 | 0.00 |
| ATOM | 1491 | O9  | LIG | 91 | 20.143 | -3.108  | -10.001 | 1.00 | 0.00 |
| ATOM | 1492 | N1  | LIG | 91 | 17.803 | -9.836  | -4.521  | 1.00 | 0.00 |
| ATOM | 1493 | H3  | LIG | 91 | 17.008 | -10.086 | -3.955  | 1.00 | 0.00 |
| ATOM | 1494 | H4  | LIG | 91 | 17.795 | -9.013  | -5.104  | 1.00 | 0.00 |
| ATOM | 1495 | N2  | LIG | 91 | 19.659 | -9.134  | -6.205  | 1.00 | 0.00 |

|      |      |     |     |    |        |         |        |      |      |
|------|------|-----|-----|----|--------|---------|--------|------|------|
| ATOM | 1496 | N3  | LIG | 91 | 16.913 | -13.776 | -1.485 | 1.00 | 0.00 |
| ATOM | 1497 | N4  | LIG | 91 | 20.589 | -8.496  | -6.779 | 1.00 | 0.00 |
| ATOM | 1498 | N5  | LIG | 91 | 16.689 | -14.914 | -0.988 | 1.00 | 0.00 |
| ATOM | 1499 | N6  | LIG | 91 | 19.240 | -3.899  | -9.767 | 1.00 | 0.00 |
| ATOM | 1500 | C1  | LIG | 91 | 18.940 | -11.890 | -3.874 | 1.00 | 0.00 |
| ATOM | 1501 | C2  | LIG | 91 | 20.105 | -12.698 | -4.000 | 1.00 | 0.00 |
| ATOM | 1502 | C3  | LIG | 91 | 18.850 | -10.670 | -4.644 | 1.00 | 0.00 |
| ATOM | 1503 | C4  | LIG | 91 | 21.048 | -11.181 | -5.641 | 1.00 | 0.00 |
| ATOM | 1504 | C5  | LIG | 91 | 21.137 | -12.325 | -4.898 | 1.00 | 0.00 |
| ATOM | 1505 | H1  | LIG | 91 | 21.999 | -12.970 | -5.014 | 1.00 | 0.00 |
| ATOM | 1506 | C6  | LIG | 91 | 17.927 | -12.347 | -2.992 | 1.00 | 0.00 |
| ATOM | 1507 | C7  | LIG | 91 | 19.253 | -14.300 | -2.383 | 1.00 | 0.00 |
| ATOM | 1508 | C8  | LIG | 91 | 20.241 | -13.881 | -3.234 | 1.00 | 0.00 |
| ATOM | 1509 | H2  | LIG | 91 | 21.150 | -14.462 | -3.313 | 1.00 | 0.00 |
| ATOM | 1510 | C9  | LIG | 91 | 19.917 | -10.309 | -5.532 | 1.00 | 0.00 |
| ATOM | 1511 | C10 | LIG | 91 | 18.046 | -13.549 | -2.255 | 1.00 | 0.00 |
| ATOM | 1512 | C11 | LIG | 91 | 20.189 | -7.366  | -7.519 | 1.00 | 0.00 |
| ATOM | 1513 | C12 | LIG | 91 | 15.547 | -15.037 | -0.173 | 1.00 | 0.00 |
| ATOM | 1514 | C13 | LIG | 91 | 18.874 | -7.161  | -7.970 | 1.00 | 0.00 |
| ATOM | 1515 | H8  | LIG | 91 | 18.117 | -7.905  | -7.763 | 1.00 | 0.00 |
| ATOM | 1516 | C14 | LIG | 91 | 21.193 | -6.443  | -7.841 | 1.00 | 0.00 |
| ATOM | 1517 | H9  | LIG | 91 | 22.209 | -6.622  | -7.511 | 1.00 | 0.00 |

|      |      |     |     |    |        |         |        |      |      |
|------|------|-----|-----|----|--------|---------|--------|------|------|
| ATOM | 1518 | C15 | LIG | 91 | 18.564 | -6.028  | -8.703 | 1.00 | 0.00 |
| ATOM | 1519 | H10 | LIG | 91 | 17.563 | -5.848  | -9.069 | 1.00 | 0.00 |
| ATOM | 1520 | C16 | LIG | 91 | 20.887 | -5.302  | -8.569 | 1.00 | 0.00 |
| ATOM | 1521 | H11 | LIG | 91 | 21.642 | -4.571  | -8.819 | 1.00 | 0.00 |
| ATOM | 1522 | C17 | LIG | 91 | 19.573 | -5.108  | -8.985 | 1.00 | 0.00 |
| ATOM | 1523 | C18 | LIG | 91 | 14.843 | -13.947 | 0.365  | 1.00 | 0.00 |
| ATOM | 1524 | H12 | LIG | 91 | 15.192 | -12.939 | 0.181  | 1.00 | 0.00 |
| ATOM | 1525 | C19 | LIG | 91 | 15.140 | -16.347 | 0.117  | 1.00 | 0.00 |
| ATOM | 1526 | H13 | LIG | 91 | 15.706 | -17.181 | -0.282 | 1.00 | 0.00 |
| ATOM | 1527 | C20 | LIG | 91 | 13.729 | -14.176 | 1.156  | 1.00 | 0.00 |
| ATOM | 1528 | H14 | LIG | 91 | 13.189 | -13.338 | 1.582  | 1.00 | 0.00 |
| ATOM | 1529 | C21 | LIG | 91 | 14.015 | -16.566 | 0.903  | 1.00 | 0.00 |
| ATOM | 1530 | H15 | LIG | 91 | 13.697 | -17.579 | 1.118  | 1.00 | 0.00 |
| ATOM | 1531 | C22 | LIG | 91 | 13.306 | -15.483 | 1.422  | 1.00 | 0.00 |
| ATOM | 1532 | H16 | LIG | 91 | 12.436 | -15.653 | 2.046  | 1.00 | 0.00 |
| TER  |      |     |     |    |        |         |        |      |      |
| ATOM | 1533 | S1  | LIG | 92 | 13.614 | -5.876  | 19.607 | 1.00 | 0.00 |
| ATOM | 1534 | S2  | LIG | 92 | 13.002 | -6.295  | 11.877 | 1.00 | 0.00 |
| ATOM | 1535 | O1  | LIG | 92 | 16.466 | -9.335  | 14.350 | 1.00 | 0.00 |
| ATOM | 1536 | H5  | LIG | 92 | 16.513 | -9.582  | 13.402 | 1.00 | 0.00 |
| ATOM | 1537 | O2  | LIG | 92 | 14.819 | -5.061  | 20.284 | 1.00 | 0.00 |
| ATOM | 1538 | H6  | LIG | 92 | 15.501 | -5.772  | 20.480 | 1.00 | 0.00 |

|      |      |    |     |    |        |         |        |      |      |
|------|------|----|-----|----|--------|---------|--------|------|------|
| ATOM | 1539 | O3 | LIG | 92 | 12.268 | -7.560  | 11.210 | 1.00 | 0.00 |
| ATOM | 1540 | H7 | LIG | 92 | 13.018 | -8.177  | 10.971 | 1.00 | 0.00 |
| ATOM | 1541 | O4 | LIG | 92 | 12.635 | -4.897  | 19.179 | 1.00 | 0.00 |
| ATOM | 1542 | O5 | LIG | 92 | 13.231 | -6.996  | 20.454 | 1.00 | 0.00 |
| ATOM | 1543 | O6 | LIG | 92 | 11.960 | -5.406  | 12.350 | 1.00 | 0.00 |
| ATOM | 1544 | O7 | LIG | 92 | 14.057 | -5.819  | 10.996 | 1.00 | 0.00 |
| ATOM | 1545 | O8 | LIG | 92 | 19.261 | -10.734 | 24.684 | 1.00 | 0.00 |
| ATOM | 1546 | O9 | LIG | 92 | 19.327 | -8.766  | 25.598 | 1.00 | 0.00 |
| ATOM | 1547 | N1 | LIG | 92 | 16.913 | -9.002  | 16.944 | 1.00 | 0.00 |
| ATOM | 1548 | H3 | LIG | 92 | 17.182 | -9.507  | 16.115 | 1.00 | 0.00 |
| ATOM | 1549 | H4 | LIG | 92 | 17.328 | -9.205  | 17.841 | 1.00 | 0.00 |
| ATOM | 1550 | N2 | LIG | 92 | 16.212 | -7.964  | 19.225 | 1.00 | 0.00 |
| ATOM | 1551 | N3 | LIG | 92 | 15.291 | -8.773  | 12.164 | 1.00 | 0.00 |
| ATOM | 1552 | N4 | LIG | 92 | 16.229 | -7.320  | 20.314 | 1.00 | 0.00 |
| ATOM | 1553 | N5 | LIG | 92 | 14.633 | -8.832  | 11.090 | 1.00 | 0.00 |
| ATOM | 1554 | N6 | LIG | 92 | 19.012 | -9.534  | 24.699 | 1.00 | 0.00 |
| ATOM | 1555 | C1 | LIG | 92 | 15.201 | -7.808  | 15.690 | 1.00 | 0.00 |
| ATOM | 1556 | C2 | LIG | 92 | 14.158 | -6.839  | 15.722 | 1.00 | 0.00 |
| ATOM | 1557 | C3 | LIG | 92 | 15.881 | -8.142  | 16.921 | 1.00 | 0.00 |
| ATOM | 1558 | C4 | LIG | 92 | 14.399 | -6.574  | 18.120 | 1.00 | 0.00 |
| ATOM | 1559 | C5 | LIG | 92 | 13.771 | -6.248  | 16.951 | 1.00 | 0.00 |
| ATOM | 1560 | H1 | LIG | 92 | 12.949 | -5.544  | 16.966 | 1.00 | 0.00 |

|      |      |     |     |    |        |         |        |      |      |
|------|------|-----|-----|----|--------|---------|--------|------|------|
| ATOM | 1561 | C6  | LIG | 92 | 15.505 | -8.392  | 14.434 | 1.00 | 0.00 |
| ATOM | 1562 | C7  | LIG | 92 | 13.809 | -7.036  | 13.324 | 1.00 | 0.00 |
| ATOM | 1563 | C8  | LIG | 92 | 13.496 | -6.463  | 14.528 | 1.00 | 0.00 |
| ATOM | 1564 | H2  | LIG | 92 | 12.732 | -5.697  | 14.564 | 1.00 | 0.00 |
| ATOM | 1565 | C9  | LIG | 92 | 15.480 | -7.515  | 18.148 | 1.00 | 0.00 |
| ATOM | 1566 | C10 | LIG | 92 | 14.817 | -8.044  | 13.247 | 1.00 | 0.00 |
| ATOM | 1567 | C11 | LIG | 92 | 16.928 | -7.929  | 21.375 | 1.00 | 0.00 |
| ATOM | 1568 | C12 | LIG | 92 | 15.218 | -9.544  | 10.025 | 1.00 | 0.00 |
| ATOM | 1569 | C13 | LIG | 92 | 17.230 | -9.300  | 21.417 | 1.00 | 0.00 |
| ATOM | 1570 | H8  | LIG | 92 | 16.903 | -9.944  | 20.611 | 1.00 | 0.00 |
| ATOM | 1571 | C14 | LIG | 92 | 17.285 | -7.098  | 22.446 | 1.00 | 0.00 |
| ATOM | 1572 | H9  | LIG | 92 | 17.026 | -6.047  | 22.416 | 1.00 | 0.00 |
| ATOM | 1573 | C15 | LIG | 92 | 17.912 | -9.824  | 22.502 | 1.00 | 0.00 |
| ATOM | 1574 | H10 | LIG | 92 | 18.150 | -10.877 | 22.566 | 1.00 | 0.00 |
| ATOM | 1575 | C16 | LIG | 92 | 17.975 | -7.616  | 23.532 | 1.00 | 0.00 |
| ATOM | 1576 | H11 | LIG | 92 | 18.271 | -6.993  | 24.364 | 1.00 | 0.00 |
| ATOM | 1577 | C17 | LIG | 92 | 18.283 | -8.973  | 23.542 | 1.00 | 0.00 |
| ATOM | 1578 | C18 | LIG | 92 | 16.574 | -9.909  | 9.973  | 1.00 | 0.00 |
| ATOM | 1579 | H12 | LIG | 92 | 17.240 | -9.614  | 10.773 | 1.00 | 0.00 |
| ATOM | 1580 | C19 | LIG | 92 | 14.365 | -9.864  | 8.959  | 1.00 | 0.00 |
| ATOM | 1581 | H13 | LIG | 92 | 13.327 | -9.555  | 8.998  | 1.00 | 0.00 |
| ATOM | 1582 | C20 | LIG | 92 | 17.052 | -10.611 | 8.878  | 1.00 | 0.00 |

|      |      |     |     |    |         |         |        |      |      |
|------|------|-----|-----|----|---------|---------|--------|------|------|
| ATOM | 1583 | H14 | LIG | 92 | 18.099  | -10.885 | 8.830  | 1.00 | 0.00 |
| ATOM | 1584 | C21 | LIG | 92 | 14.851  | -10.578 | 7.870  | 1.00 | 0.00 |
| ATOM | 1585 | H15 | LIG | 92 | 14.187  | -10.832 | 7.053  | 1.00 | 0.00 |
| ATOM | 1586 | C22 | LIG | 92 | 16.193  | -10.955 | 7.828  | 1.00 | 0.00 |
| ATOM | 1587 | H16 | LIG | 92 | 16.576  | -11.501 | 6.974  | 1.00 | 0.00 |
| TER  |      |     |     |    |         |         |        |      |      |
| ATOM | 1588 | S1  | LIG | 93 | -12.964 | 17.469  | 10.138 | 1.00 | 0.00 |
| ATOM | 1589 | S2  | LIG | 93 | -19.249 | 20.536  | 13.514 | 1.00 | 0.00 |
| ATOM | 1590 | O1  | LIG | 93 | -18.270 | 21.573  | 8.482  | 1.00 | 0.00 |
| ATOM | 1591 | H5  | LIG | 93 | -19.125 | 22.007  | 8.689  | 1.00 | 0.00 |
| ATOM | 1592 | O2  | LIG | 93 | -11.649 | 18.359  | 9.906  | 1.00 | 0.00 |
| ATOM | 1593 | H6  | LIG | 93 | -11.745 | 18.676  | 8.958  | 1.00 | 0.00 |
| ATOM | 1594 | O3  | LIG | 93 | -20.700 | 19.933  | 13.176 | 1.00 | 0.00 |
| ATOM | 1595 | H7  | LIG | 93 | -21.052 | 20.537  | 12.461 | 1.00 | 0.00 |
| ATOM | 1596 | O4  | LIG | 93 | -12.963 | 17.076  | 11.532 | 1.00 | 0.00 |
| ATOM | 1597 | O5  | LIG | 93 | -13.086 | 16.477  | 9.079  | 1.00 | 0.00 |
| ATOM | 1598 | O6  | LIG | 93 | -18.633 | 19.638  | 14.470 | 1.00 | 0.00 |
| ATOM | 1599 | O7  | LIG | 93 | -19.359 | 21.962  | 13.781 | 1.00 | 0.00 |
| ATOM | 1600 | O8  | LIG | 93 | -10.516 | 18.685  | 1.547  | 1.00 | 0.00 |
| ATOM | 1601 | O9  | LIG | 93 | -8.633  | 18.770  | 2.624  | 1.00 | 0.00 |
| ATOM | 1602 | N1  | LIG | 93 | -15.983 | 20.794  | 7.384  | 1.00 | 0.00 |
| ATOM | 1603 | H3  | LIG | 93 | -16.843 | 21.298  | 7.238  | 1.00 | 0.00 |

|      |      |     |     |    |         |        |        |      |      |
|------|------|-----|-----|----|---------|--------|--------|------|------|
| ATOM | 1604 | H4  | LIG | 93 | -15.314 | 20.670 | 6.640  | 1.00 | 0.00 |
| ATOM | 1605 | N2  | LIG | 93 | -13.816 | 19.358 | 7.498  | 1.00 | 0.00 |
| ATOM | 1606 | N3  | LIG | 93 | -19.905 | 21.752 | 10.424 | 1.00 | 0.00 |
| ATOM | 1607 | N4  | LIG | 93 | -12.600 | 19.006 | 7.505  | 1.00 | 0.00 |
| ATOM | 1608 | N5  | LIG | 93 | -20.929 | 21.693 | 11.157 | 1.00 | 0.00 |
| ATOM | 1609 | N6  | LIG | 93 | -9.856  | 18.751 | 2.577  | 1.00 | 0.00 |
| ATOM | 1610 | C1  | LIG | 93 | -16.674 | 20.224 | 9.649  | 1.00 | 0.00 |
| ATOM | 1611 | C2  | LIG | 93 | -16.347 | 19.554 | 10.862 | 1.00 | 0.00 |
| ATOM | 1612 | C3  | LIG | 93 | -15.759 | 20.134 | 8.534  | 1.00 | 0.00 |
| ATOM | 1613 | C4  | LIG | 93 | -14.304 | 18.678 | 9.894  | 1.00 | 0.00 |
| ATOM | 1614 | C5  | LIG | 93 | -15.163 | 18.781 | 10.952 | 1.00 | 0.00 |
| ATOM | 1615 | H1  | LIG | 93 | -14.947 | 18.244 | 11.867 | 1.00 | 0.00 |
| ATOM | 1616 | C6  | LIG | 93 | -17.897 | 20.942 | 9.614  | 1.00 | 0.00 |
| ATOM | 1617 | C7  | LIG | 93 | -18.378 | 20.355 | 11.932 | 1.00 | 0.00 |
| ATOM | 1618 | C8  | LIG | 93 | -17.205 | 19.651 | 11.985 | 1.00 | 0.00 |
| ATOM | 1619 | H2  | LIG | 93 | -16.921 | 19.168 | 12.911 | 1.00 | 0.00 |
| ATOM | 1620 | C9  | LIG | 93 | -14.559 | 19.358 | 8.659  | 1.00 | 0.00 |
| ATOM | 1621 | C10 | LIG | 93 | -18.772 | 21.007 | 10.724 | 1.00 | 0.00 |
| ATOM | 1622 | C11 | LIG | 93 | -11.973 | 18.948 | 6.245  | 1.00 | 0.00 |
| ATOM | 1623 | C12 | LIG | 93 | -22.008 | 22.527 | 10.810 | 1.00 | 0.00 |
| ATOM | 1624 | C13 | LIG | 93 | -12.678 | 18.860 | 5.032  | 1.00 | 0.00 |
| ATOM | 1625 | H8  | LIG | 93 | -13.759 | 18.815 | 5.045  | 1.00 | 0.00 |

|      |      |     |     |    |         |        |         |      |      |
|------|------|-----|-----|----|---------|--------|---------|------|------|
| ATOM | 1626 | C14 | LIG | 93 | -10.572 | 18.937 | 6.244   | 1.00 | 0.00 |
| ATOM | 1627 | H9  | LIG | 93 | -10.037 | 18.980 | 7.185   | 1.00 | 0.00 |
| ATOM | 1628 | C15 | LIG | 93 | -11.986 | 18.797 | 3.834   | 1.00 | 0.00 |
| ATOM | 1629 | H10 | LIG | 93 | -12.502 | 18.720 | 2.887   | 1.00 | 0.00 |
| ATOM | 1630 | C16 | LIG | 93 | -9.873  | 18.881 | 5.047   | 1.00 | 0.00 |
| ATOM | 1631 | H11 | LIG | 93 | -8.793  | 18.883 | 5.021   | 1.00 | 0.00 |
| ATOM | 1632 | C17 | LIG | 93 | -10.592 | 18.817 | 3.857   | 1.00 | 0.00 |
| ATOM | 1633 | C18 | LIG | 93 | -21.909 | 23.614 | 9.925   | 1.00 | 0.00 |
| ATOM | 1634 | H12 | LIG | 93 | -20.952 | 23.867 | 9.489   | 1.00 | 0.00 |
| ATOM | 1635 | C19 | LIG | 93 | -23.232 | 22.237 | 11.430  | 1.00 | 0.00 |
| ATOM | 1636 | H13 | LIG | 93 | -23.291 | 21.413 | 12.130  | 1.00 | 0.00 |
| ATOM | 1637 | C20 | LIG | 93 | -23.035 | 24.375 | 9.647   | 1.00 | 0.00 |
| ATOM | 1638 | H14 | LIG | 93 | -22.960 | 25.220 | 8.973   | 1.00 | 0.00 |
| ATOM | 1639 | C21 | LIG | 93 | -24.357 | 23.000 | 11.137  | 1.00 | 0.00 |
| ATOM | 1640 | H15 | LIG | 93 | -25.303 | 22.767 | 11.610  | 1.00 | 0.00 |
| ATOM | 1641 | C22 | LIG | 93 | -24.262 | 24.067 | 10.245  | 1.00 | 0.00 |
| ATOM | 1642 | H16 | LIG | 93 | -25.135 | 24.670 | 10.025  | 1.00 | 0.00 |
| TER  |      |     |     |    |         |        |         |      |      |
| ATOM | 1643 | S1  | LIG | 94 | 12.930  | 18.003 | -16.681 | 1.00 | 0.00 |
| ATOM | 1644 | S2  | LIG | 94 | 20.122  | 15.357 | -15.426 | 1.00 | 0.00 |
| ATOM | 1645 | O1  | LIG | 94 | 17.566  | 13.902 | -19.751 | 1.00 | 0.00 |
| ATOM | 1646 | H5  | LIG | 94 | 18.461  | 13.506 | -19.816 | 1.00 | 0.00 |



|      |      |    |     |    |        |        |         |      |      |
|------|------|----|-----|----|--------|--------|---------|------|------|
| ATOM | 1647 | O2 | LIG | 94 | 11.657 | 17.068 | -16.395 | 1.00 | 0.00 |
| ATOM | 1648 | H6 | LIG | 94 | 11.446 | 16.680 | -17.297 | 1.00 | 0.00 |
| ATOM | 1649 | O3 | LIG | 94 | 21.346 | 15.964 | -16.273 | 1.00 | 0.00 |
| ATOM | 1650 | H7 | LIG | 94 | 21.466 | 15.313 | -17.023 | 1.00 | 0.00 |
| ATOM | 1651 | O4 | LIG | 94 | 13.377 | 18.506 | -15.398 | 1.00 | 0.00 |
| ATOM | 1652 | O5 | LIG | 94 | 12.643 | 18.911 | -17.783 | 1.00 | 0.00 |
| ATOM | 1653 | O6 | LIG | 94 | 19.819 | 16.313 | -14.381 | 1.00 | 0.00 |
| ATOM | 1654 | O7 | LIG | 94 | 20.383 | 13.960 | -15.117 | 1.00 | 0.00 |
| ATOM | 1655 | O8 | LIG | 94 | 7.809  | 16.055 | -23.840 | 1.00 | 0.00 |
| ATOM | 1656 | O9 | LIG | 94 | 6.402  | 16.014 | -22.188 | 1.00 | 0.00 |
| ATOM | 1657 | N1 | LIG | 94 | 15.009 | 14.540 | -20.062 | 1.00 | 0.00 |
| ATOM | 1658 | H3 | LIG | 94 | 15.794 | 14.046 | -20.456 | 1.00 | 0.00 |
| ATOM | 1659 | H4 | LIG | 94 | 14.124 | 14.590 | -20.544 | 1.00 | 0.00 |
| ATOM | 1660 | N2 | LIG | 94 | 12.939 | 15.931 | -19.320 | 1.00 | 0.00 |
| ATOM | 1661 | N3 | LIG | 94 | 19.763 | 13.915 | -18.467 | 1.00 | 0.00 |
| ATOM | 1662 | N4 | LIG | 94 | 11.780 | 16.254 | -18.928 | 1.00 | 0.00 |
| ATOM | 1663 | N5 | LIG | 94 | 20.970 | 14.055 | -18.128 | 1.00 | 0.00 |
| ATOM | 1664 | N6 | LIG | 94 | 7.536  | 16.057 | -22.646 | 1.00 | 0.00 |
| ATOM | 1665 | C1 | LIG | 94 | 16.390 | 15.303 | -18.208 | 1.00 | 0.00 |
| ATOM | 1666 | C2 | LIG | 94 | 16.456 | 16.060 | -17.003 | 1.00 | 0.00 |
| ATOM | 1667 | C3 | LIG | 94 | 15.151 | 15.284 | -18.952 | 1.00 | 0.00 |
| ATOM | 1668 | C4 | LIG | 94 | 14.167 | 16.810 | -17.281 | 1.00 | 0.00 |

|      |      |     |     |    |        |        |         |      |      |
|------|------|-----|-----|----|--------|--------|---------|------|------|
| ATOM | 1669 | C5  | LIG | 94 | 15.335 | 16.811 | -16.571 | 1.00 | 0.00 |
| ATOM | 1670 | H1  | LIG | 94 | 15.412 | 17.414 | -15.675 | 1.00 | 0.00 |
| ATOM | 1671 | C6  | LIG | 94 | 17.564 | 14.613 | -18.605 | 1.00 | 0.00 |
| ATOM | 1672 | C7  | LIG | 94 | 18.764 | 15.392 | -16.630 | 1.00 | 0.00 |
| ATOM | 1673 | C8  | LIG | 94 | 17.644 | 16.071 | -16.231 | 1.00 | 0.00 |
| ATOM | 1674 | H2  | LIG | 94 | 17.664 | 16.620 | -15.298 | 1.00 | 0.00 |
| ATOM | 1675 | C9  | LIG | 94 | 14.027 | 16.040 | -18.482 | 1.00 | 0.00 |
| ATOM | 1676 | C10 | LIG | 94 | 18.762 | 14.656 | -17.853 | 1.00 | 0.00 |
| ATOM | 1677 | C11 | LIG | 94 | 10.766 | 16.198 | -19.903 | 1.00 | 0.00 |
| ATOM | 1678 | C12 | LIG | 94 | 21.909 | 13.221 | -18.763 | 1.00 | 0.00 |
| ATOM | 1679 | C13 | LIG | 94 | 11.019 | 16.206 | -21.286 | 1.00 | 0.00 |
| ATOM | 1680 | H8  | LIG | 94 | 12.038 | 16.276 | -21.641 | 1.00 | 0.00 |
| ATOM | 1681 | C14 | LIG | 94 | 9.446  | 16.178 | -19.431 | 1.00 | 0.00 |
| ATOM | 1682 | H9  | LIG | 94 | 9.260  | 16.198 | -18.365 | 1.00 | 0.00 |
| ATOM | 1683 | C15 | LIG | 94 | 9.963  | 16.158 | -22.181 | 1.00 | 0.00 |
| ATOM | 1684 | H10 | LIG | 94 | 10.128 | 16.172 | -23.249 | 1.00 | 0.00 |
| ATOM | 1685 | C16 | LIG | 94 | 8.385  | 16.123 | -20.324 | 1.00 | 0.00 |
| ATOM | 1686 | H11 | LIG | 94 | 7.360  | 16.095 | -19.983 | 1.00 | 0.00 |
| ATOM | 1687 | C17 | LIG | 94 | 8.660  | 16.109 | -21.688 | 1.00 | 0.00 |
| ATOM | 1688 | C18 | LIG | 94 | 21.572 | 12.065 | -19.487 | 1.00 | 0.00 |
| ATOM | 1689 | H12 | LIG | 94 | 20.537 | 11.757 | -19.557 | 1.00 | 0.00 |
| ATOM | 1690 | C19 | LIG | 94 | 23.255 | 13.586 | -18.613 | 1.00 | 0.00 |

|      |      |     |     |    |         |         |         |      |      |
|------|------|-----|-----|----|---------|---------|---------|------|------|
| ATOM | 1691 | H13 | LIG | 94 | 23.505  | 14.465  | -18.030 | 1.00 | 0.00 |
| ATOM | 1692 | C20 | LIG | 94 | 22.575  | 11.310  | -20.077 | 1.00 | 0.00 |
| ATOM | 1693 | H14 | LIG | 94 | 22.319  | 10.413  | -20.628 | 1.00 | 0.00 |
| ATOM | 1694 | C21 | LIG | 94 | 24.252  | 12.829  | -19.217 | 1.00 | 0.00 |
| ATOM | 1695 | H15 | LIG | 94 | 25.289  | 13.120  | -19.107 | 1.00 | 0.00 |
| ATOM | 1696 | C22 | LIG | 94 | 23.915  | 11.692  | -19.951 | 1.00 | 0.00 |
| ATOM | 1697 | H16 | LIG | 94 | 24.692  | 11.094  | -20.411 | 1.00 | 0.00 |
| TER  |      |     |     |    |         |         |         |      |      |
| ATOM | 1698 | S1  | LIG | 95 | -6.265  | -21.654 | -15.594 | 1.00 | 0.00 |
| ATOM | 1699 | S2  | LIG | 95 | -7.347  | -15.762 | -20.537 | 1.00 | 0.00 |
| ATOM | 1700 | O1  | LIG | 95 | -10.296 | -20.060 | -20.975 | 1.00 | 0.00 |
| ATOM | 1701 | H5  | LIG | 95 | -10.629 | -19.430 | -21.649 | 1.00 | 0.00 |
| ATOM | 1702 | O2  | LIG | 95 | -5.444  | -22.956 | -16.048 | 1.00 | 0.00 |
| ATOM | 1703 | H6  | LIG | 95 | -6.163  | -23.599 | -16.328 | 1.00 | 0.00 |
| ATOM | 1704 | O3  | LIG | 95 | -8.634  | -14.815 | -20.367 | 1.00 | 0.00 |
| ATOM | 1705 | H7  | LIG | 95 | -9.301  | -15.196 | -21.009 | 1.00 | 0.00 |
| ATOM | 1706 | O4  | LIG | 95 | -5.288  | -20.627 | -15.292 | 1.00 | 0.00 |
| ATOM | 1707 | O5  | LIG | 95 | -7.288  | -22.022 | -14.627 | 1.00 | 0.00 |
| ATOM | 1708 | O6  | LIG | 95 | -6.376  | -15.333 | -19.551 | 1.00 | 0.00 |
| ATOM | 1709 | O7  | LIG | 95 | -6.995  | -15.866 | -21.945 | 1.00 | 0.00 |
| ATOM | 1710 | O8  | LIG | 95 | -10.883 | -29.396 | -15.585 | 1.00 | 0.00 |
| ATOM | 1711 | O9  | LIG | 95 | -8.846  | -30.023 | -15.173 | 1.00 | 0.00 |

|      |      |     |     |    |         |         |         |      |      |
|------|------|-----|-----|----|---------|---------|---------|------|------|
| ATOM | 1712 | N1  | LIG | 95 | -9.752  | -22.201 | -19.505 | 1.00 | 0.00 |
| ATOM | 1713 | H3  | LIG | 95 | -10.340 | -21.820 | -20.229 | 1.00 | 0.00 |
| ATOM | 1714 | H4  | LIG | 95 | -9.892  | -23.135 | -19.152 | 1.00 | 0.00 |
| ATOM | 1715 | N2  | LIG | 95 | -8.487  | -23.286 | -17.507 | 1.00 | 0.00 |
| ATOM | 1716 | N3  | LIG | 95 | -9.882  | -17.664 | -21.726 | 1.00 | 0.00 |
| ATOM | 1717 | N4  | LIG | 95 | -7.749  | -24.048 | -16.816 | 1.00 | 0.00 |
| ATOM | 1718 | N5  | LIG | 95 | -10.010 | -16.441 | -22.008 | 1.00 | 0.00 |
| ATOM | 1719 | N6  | LIG | 95 | -9.678  | -29.191 | -15.510 | 1.00 | 0.00 |
| ATOM | 1720 | C1  | LIG | 95 | -8.603  | -20.065 | -19.283 | 1.00 | 0.00 |
| ATOM | 1721 | C2  | LIG | 95 | -7.594  | -19.319 | -18.611 | 1.00 | 0.00 |
| ATOM | 1722 | C3  | LIG | 95 | -8.855  | -21.427 | -18.870 | 1.00 | 0.00 |
| ATOM | 1723 | C4  | LIG | 95 | -7.126  | -21.178 | -17.127 | 1.00 | 0.00 |
| ATOM | 1724 | C5  | LIG | 95 | -6.879  | -19.896 | -17.532 | 1.00 | 0.00 |
| ATOM | 1725 | H1  | LIG | 95 | -6.143  | -19.304 | -17.005 | 1.00 | 0.00 |
| ATOM | 1726 | C6  | LIG | 95 | -9.310  | -19.409 | -20.323 | 1.00 | 0.00 |
| ATOM | 1727 | C7  | LIG | 95 | -7.988  | -17.382 | -20.026 | 1.00 | 0.00 |
| ATOM | 1728 | C8  | LIG | 95 | -7.298  | -17.994 | -19.014 | 1.00 | 0.00 |
| ATOM | 1729 | H2  | LIG | 95 | -6.500  | -17.455 | -18.519 | 1.00 | 0.00 |
| ATOM | 1730 | C9  | LIG | 95 | -8.105  | -21.992 | -17.785 | 1.00 | 0.00 |
| ATOM | 1731 | C10 | LIG | 95 | -9.041  | -18.072 | -20.700 | 1.00 | 0.00 |
| ATOM | 1732 | C11 | LIG | 95 | -8.289  | -25.312 | -16.511 | 1.00 | 0.00 |
| ATOM | 1733 | C12 | LIG | 95 | -10.838 | -16.124 | -23.101 | 1.00 | 0.00 |

|      |      |     |     |    |         |         |         |      |      |
|------|------|-----|-----|----|---------|---------|---------|------|------|
| ATOM | 1734 | C13 | LIG | 95 | -9.663  | -25.602 | -16.569 | 1.00 | 0.00 |
| ATOM | 1735 | H8  | LIG | 95 | -10.361 | -24.822 | -16.842 | 1.00 | 0.00 |
| ATOM | 1736 | C14 | LIG | 95 | -7.382  | -26.295 | -16.091 | 1.00 | 0.00 |
| ATOM | 1737 | H9  | LIG | 95 | -6.328  | -26.055 | -16.026 | 1.00 | 0.00 |
| ATOM | 1738 | C15 | LIG | 95 | -10.116 | -26.869 | -16.243 | 1.00 | 0.00 |
| ATOM | 1739 | H10 | LIG | 95 | -11.168 | -27.117 | -16.269 | 1.00 | 0.00 |
| ATOM | 1740 | C16 | LIG | 95 | -7.829  | -27.568 | -15.770 | 1.00 | 0.00 |
| ATOM | 1741 | H11 | LIG | 95 | -7.147  | -28.345 | -15.455 | 1.00 | 0.00 |
| ATOM | 1742 | C17 | LIG | 95 | -9.192  | -27.838 | -15.856 | 1.00 | 0.00 |
| ATOM | 1743 | C18 | LIG | 95 | -11.262 | -17.056 | -24.063 | 1.00 | 0.00 |
| ATOM | 1744 | H12 | LIG | 95 | -10.926 | -18.082 | -24.001 | 1.00 | 0.00 |
| ATOM | 1745 | C19 | LIG | 95 | -11.216 | -14.778 | -23.214 | 1.00 | 0.00 |
| ATOM | 1746 | H13 | LIG | 95 | -10.861 | -14.063 | -22.481 | 1.00 | 0.00 |
| ATOM | 1747 | C20 | LIG | 95 | -12.079 | -16.641 | -25.103 | 1.00 | 0.00 |
| ATOM | 1748 | H14 | LIG | 95 | -12.400 | -17.355 | -25.853 | 1.00 | 0.00 |
| ATOM | 1749 | C21 | LIG | 95 | -12.044 | -14.374 | -24.255 | 1.00 | 0.00 |
| ATOM | 1750 | H15 | LIG | 95 | -12.342 | -13.336 | -24.334 | 1.00 | 0.00 |
| ATOM | 1751 | C22 | LIG | 95 | -12.479 | -15.304 | -25.199 | 1.00 | 0.00 |
| ATOM | 1752 | H16 | LIG | 95 | -13.114 | -14.987 | -26.018 | 1.00 | 0.00 |
| TER  |      |     |     |    |         |         |         |      |      |
| ATOM | 1753 | S1  | LIG | 96 | 3.175   | 28.045  | -9.482  | 1.00 | 0.00 |
| ATOM | 1754 | S2  | LIG | 96 | -2.899  | 26.873  | -4.788  | 1.00 | 0.00 |

|      |      |    |     |    |        |        |         |      |      |
|------|------|----|-----|----|--------|--------|---------|------|------|
| ATOM | 1755 | O1 | LIG | 96 | -2.076 | 23.609 | -8.791  | 1.00 | 0.00 |
| ATOM | 1756 | H5 | LIG | 96 | -2.849 | 23.253 | -8.303  | 1.00 | 0.00 |
| ATOM | 1757 | O2 | LIG | 96 | 2.971  | 28.725 | -10.921 | 1.00 | 0.00 |
| ATOM | 1758 | H6 | LIG | 96 | 2.910  | 27.939 | -11.544 | 1.00 | 0.00 |
| ATOM | 1759 | O3 | LIG | 96 | -2.850 | 25.677 | -3.715  | 1.00 | 0.00 |
| ATOM | 1760 | H7 | LIG | 96 | -3.327 | 24.924 | -4.170  | 1.00 | 0.00 |
| ATOM | 1761 | O4 | LIG | 96 | 3.147  | 29.115 | -8.505  | 1.00 | 0.00 |
| ATOM | 1762 | O5 | LIG | 96 | 4.283  | 27.103 | -9.529  | 1.00 | 0.00 |
| ATOM | 1763 | O6 | LIG | 96 | -2.125 | 27.965 | -4.235  | 1.00 | 0.00 |
| ATOM | 1764 | O7 | LIG | 96 | -4.268 | 27.072 | -5.239  | 1.00 | 0.00 |
| ATOM | 1765 | O8 | LIG | 96 | 5.374  | 22.935 | -16.575 | 1.00 | 0.00 |
| ATOM | 1766 | O9 | LIG | 96 | 5.751  | 24.956 | -17.274 | 1.00 | 0.00 |
| ATOM | 1767 | N1 | LIG | 96 | -0.197 | 24.151 | -10.584 | 1.00 | 0.00 |
| ATOM | 1768 | H3 | LIG | 96 | -0.939 | 23.521 | -10.326 | 1.00 | 0.00 |
| ATOM | 1769 | H4 | LIG | 96 | 0.375  | 23.985 | -11.398 | 1.00 | 0.00 |
| ATOM | 1770 | N2 | LIG | 96 | 1.887  | 25.536 | -11.299 | 1.00 | 0.00 |
| ATOM | 1771 | N3 | LIG | 96 | -3.398 | 24.106 | -6.674  | 1.00 | 0.00 |
| ATOM | 1772 | N4 | LIG | 96 | 2.673  | 26.286 | -11.948 | 1.00 | 0.00 |
| ATOM | 1773 | N5 | LIG | 96 | -3.945 | 24.035 | -5.540  | 1.00 | 0.00 |
| ATOM | 1774 | N6 | LIG | 96 | 5.299  | 24.153 | -16.468 | 1.00 | 0.00 |
| ATOM | 1775 | C1 | LIG | 96 | -0.575 | 25.459 | -8.565  | 1.00 | 0.00 |
| ATOM | 1776 | C2 | LIG | 96 | -0.183 | 26.580 | -7.780  | 1.00 | 0.00 |

|      |      |     |     |    |        |        |         |      |      |
|------|------|-----|-----|----|--------|--------|---------|------|------|
| ATOM | 1777 | C3  | LIG | 96 | 0.163  | 25.159 | -9.771  | 1.00 | 0.00 |
| ATOM | 1778 | C4  | LIG | 96 | 1.650  | 27.068 | -9.290  | 1.00 | 0.00 |
| ATOM | 1779 | C5  | LIG | 96 | 0.938  | 27.359 | -8.160  | 1.00 | 0.00 |
| ATOM | 1780 | H1  | LIG | 96 | 1.250  | 28.184 | -7.533  | 1.00 | 0.00 |
| ATOM | 1781 | C6  | LIG | 96 | -1.678 | 24.697 | -8.101  | 1.00 | 0.00 |
| ATOM | 1782 | C7  | LIG | 96 | -1.973 | 26.177 | -6.186  | 1.00 | 0.00 |
| ATOM | 1783 | C8  | LIG | 96 | -0.907 | 26.923 | -6.612  | 1.00 | 0.00 |
| ATOM | 1784 | H2  | LIG | 96 | -0.619 | 27.802 | -6.050  | 1.00 | 0.00 |
| ATOM | 1785 | C9  | LIG | 96 | 1.284  | 25.975 | -10.140 | 1.00 | 0.00 |
| ATOM | 1786 | C10 | LIG | 96 | -2.378 | 25.018 | -6.913  | 1.00 | 0.00 |
| ATOM | 1787 | C11 | LIG | 96 | 3.308  | 25.694 | -13.056 | 1.00 | 0.00 |
| ATOM | 1788 | C12 | LIG | 96 | -5.010 | 23.123 | -5.405  | 1.00 | 0.00 |
| ATOM | 1789 | C13 | LIG | 96 | 3.434  | 24.305 | -13.227 | 1.00 | 0.00 |
| ATOM | 1790 | H8  | LIG | 96 | 3.045  | 23.637 | -12.470 | 1.00 | 0.00 |
| ATOM | 1791 | C14 | LIG | 96 | 3.870  | 26.570 | -13.996 | 1.00 | 0.00 |
| ATOM | 1792 | H9  | LIG | 96 | 3.790  | 27.639 | -13.843 | 1.00 | 0.00 |
| ATOM | 1793 | C15 | LIG | 96 | 4.083  | 23.802 | -14.342 | 1.00 | 0.00 |
| ATOM | 1794 | H10 | LIG | 96 | 4.203  | 22.739 | -14.495 | 1.00 | 0.00 |
| ATOM | 1795 | C16 | LIG | 96 | 4.515  | 26.072 | -15.118 | 1.00 | 0.00 |
| ATOM | 1796 | H11 | LIG | 96 | 4.945  | 26.728 | -15.861 | 1.00 | 0.00 |
| ATOM | 1797 | C17 | LIG | 96 | 4.608  | 24.692 | -15.278 | 1.00 | 0.00 |
| ATOM | 1798 | C18 | LIG | 96 | -5.689 | 22.542 | -6.489  | 1.00 | 0.00 |

|      |      |     |     |    |        |        |        |      |      |
|------|------|-----|-----|----|--------|--------|--------|------|------|
| ATOM | 1799 | H12 | LIG | 96 | -5.418 | 22.812 | -7.500 | 1.00 | 0.00 |
| ATOM | 1800 | C19 | LIG | 96 | -5.403 | 22.829 | -4.092 | 1.00 | 0.00 |
| ATOM | 1801 | H13 | LIG | 96 | -4.889 | 23.303 | -3.264 | 1.00 | 0.00 |
| ATOM | 1802 | C20 | LIG | 96 | -6.726 | 21.654 | -6.248 | 1.00 | 0.00 |
| ATOM | 1803 | H14 | LIG | 96 | -7.260 | 21.211 | -7.082 | 1.00 | 0.00 |
| ATOM | 1804 | C21 | LIG | 96 | -6.437 | 21.929 | -3.861 | 1.00 | 0.00 |
| ATOM | 1805 | H15 | LIG | 96 | -6.731 | 21.696 | -2.845 | 1.00 | 0.00 |
| ATOM | 1806 | C22 | LIG | 96 | -7.099 | 21.338 | -4.937 | 1.00 | 0.00 |
| ATOM | 1807 | H16 | LIG | 96 | -7.913 | 20.646 | -4.759 | 1.00 | 0.00 |

TER

|      |      |    |     |    |        |        |         |      |      |
|------|------|----|-----|----|--------|--------|---------|------|------|
| ATOM | 1808 | S1 | LIG | 97 | 20.133 | 21.560 | -9.079  | 1.00 | 0.00 |
| ATOM | 1809 | S2 | LIG | 97 | 22.157 | 24.667 | -15.903 | 1.00 | 0.00 |
| ATOM | 1810 | O1 | LIG | 97 | 17.607 | 26.025 | -13.708 | 1.00 | 0.00 |
| ATOM | 1811 | H5 | LIG | 97 | 17.690 | 26.566 | -14.522 | 1.00 | 0.00 |
| ATOM | 1812 | O2 | LIG | 97 | 19.065 | 20.364 | -9.015  | 1.00 | 0.00 |
| ATOM | 1813 | H6 | LIG | 97 | 18.200 | 20.834 | -8.819  | 1.00 | 0.00 |
| ATOM | 1814 | O3 | LIG | 97 | 22.662 | 26.192 | -15.958 | 1.00 | 0.00 |
| ATOM | 1815 | H7 | LIG | 97 | 21.842 | 26.709 | -16.206 | 1.00 | 0.00 |
| ATOM | 1816 | O4 | LIG | 97 | 21.394 | 20.974 | -9.485  | 1.00 | 0.00 |
| ATOM | 1817 | O5 | LIG | 97 | 20.038 | 22.377 | -7.878  | 1.00 | 0.00 |
| ATOM | 1818 | O6 | LIG | 97 | 23.273 | 23.871 | -15.437 | 1.00 | 0.00 |
| ATOM | 1819 | O7 | LIG | 97 | 21.457 | 24.336 | -17.135 | 1.00 | 0.00 |



|      |      |     |     |    |        |        |         |      |      |
|------|------|-----|-----|----|--------|--------|---------|------|------|
| ATOM | 1820 | O8  | LIG | 97 | 12.533 | 23.332 | -4.567  | 1.00 | 0.00 |
| ATOM | 1821 | O9  | LIG | 97 | 12.789 | 21.192 | -4.302  | 1.00 | 0.00 |
| ATOM | 1822 | N1  | LIG | 97 | 16.749 | 24.762 | -11.538 | 1.00 | 0.00 |
| ATOM | 1823 | H3  | LIG | 97 | 16.532 | 25.461 | -12.230 | 1.00 | 0.00 |
| ATOM | 1824 | H4  | LIG | 97 | 16.125 | 24.573 | -10.768 | 1.00 | 0.00 |
| ATOM | 1825 | N2  | LIG | 97 | 17.219 | 23.157 | -9.544  | 1.00 | 0.00 |
| ATOM | 1826 | N3  | LIG | 97 | 19.301 | 26.453 | -15.558 | 1.00 | 0.00 |
| ATOM | 1827 | N4  | LIG | 97 | 17.149 | 22.191 | -8.730  | 1.00 | 0.00 |
| ATOM | 1828 | N5  | LIG | 97 | 20.124 | 26.987 | -16.350 | 1.00 | 0.00 |
| ATOM | 1829 | N6  | LIG | 97 | 13.071 | 22.262 | -4.826  | 1.00 | 0.00 |
| ATOM | 1830 | C1  | LIG | 97 | 18.924 | 24.386 | -12.565 | 1.00 | 0.00 |
| ATOM | 1831 | C2  | LIG | 97 | 20.152 | 23.666 | -12.527 | 1.00 | 0.00 |
| ATOM | 1832 | C3  | LIG | 97 | 17.950 | 24.158 | -11.522 | 1.00 | 0.00 |
| ATOM | 1833 | C4  | LIG | 97 | 19.510 | 22.568 | -10.462 | 1.00 | 0.00 |
| ATOM | 1834 | C5  | LIG | 97 | 20.422 | 22.773 | -11.459 | 1.00 | 0.00 |
| ATOM | 1835 | H1  | LIG | 97 | 21.376 | 22.263 | -11.421 | 1.00 | 0.00 |
| ATOM | 1836 | C6  | LIG | 97 | 18.740 | 25.297 | -13.637 | 1.00 | 0.00 |
| ATOM | 1837 | C7  | LIG | 97 | 20.913 | 24.719 | -14.581 | 1.00 | 0.00 |
| ATOM | 1838 | C8  | LIG | 97 | 21.114 | 23.839 | -13.552 | 1.00 | 0.00 |
| ATOM | 1839 | H2  | LIG | 97 | 22.024 | 23.254 | -13.528 | 1.00 | 0.00 |
| ATOM | 1840 | C9  | LIG | 97 | 18.243 | 23.236 | -10.463 | 1.00 | 0.00 |
| ATOM | 1841 | C10 | LIG | 97 | 19.718 | 25.498 | -14.640 | 1.00 | 0.00 |

|      |      |     |     |    |        |        |         |      |      |
|------|------|-----|-----|----|--------|--------|---------|------|------|
| ATOM | 1842 | C11 | LIG | 97 | 16.120 | 22.271 | -7.772  | 1.00 | 0.00 |
| ATOM | 1843 | C12 | LIG | 97 | 19.603 | 27.901 | -17.286 | 1.00 | 0.00 |
| ATOM | 1844 | C13 | LIG | 97 | 15.475 | 23.471 | -7.426  | 1.00 | 0.00 |
| ATOM | 1845 | H8  | LIG | 97 | 15.782 | 24.396 | -7.895  | 1.00 | 0.00 |
| ATOM | 1846 | C14 | LIG | 97 | 15.779 | 21.078 | -7.120  | 1.00 | 0.00 |
| ATOM | 1847 | H9  | LIG | 97 | 16.298 | 20.163 | -7.375  | 1.00 | 0.00 |
| ATOM | 1848 | C15 | LIG | 97 | 14.478 | 23.467 | -6.464  | 1.00 | 0.00 |
| ATOM | 1849 | H10 | LIG | 97 | 13.972 | 24.376 | -6.172  | 1.00 | 0.00 |
| ATOM | 1850 | C16 | LIG | 97 | 14.776 | 21.067 | -6.161  | 1.00 | 0.00 |
| ATOM | 1851 | H11 | LIG | 97 | 14.488 | 20.157 | -5.653  | 1.00 | 0.00 |
| ATOM | 1852 | C17 | LIG | 97 | 14.136 | 22.264 | -5.851  | 1.00 | 0.00 |
| ATOM | 1853 | C18 | LIG | 97 | 18.238 | 28.015 | -17.598 | 1.00 | 0.00 |
| ATOM | 1854 | H12 | LIG | 97 | 17.522 | 27.354 | -17.127 | 1.00 | 0.00 |
| ATOM | 1855 | C19 | LIG | 97 | 20.542 | 28.709 | -17.943 | 1.00 | 0.00 |
| ATOM | 1856 | H13 | LIG | 97 | 21.595 | 28.595 | -17.713 | 1.00 | 0.00 |
| ATOM | 1857 | C20 | LIG | 97 | 17.826 | 28.949 | -18.536 | 1.00 | 0.00 |
| ATOM | 1858 | H14 | LIG | 97 | 16.775 | 29.032 | -18.787 | 1.00 | 0.00 |
| ATOM | 1859 | C21 | LIG | 97 | 20.118 | 29.650 | -18.874 | 1.00 | 0.00 |
| ATOM | 1860 | H15 | LIG | 97 | 20.845 | 30.279 | -19.373 | 1.00 | 0.00 |
| ATOM | 1861 | C22 | LIG | 97 | 18.761 | 29.774 | -19.171 | 1.00 | 0.00 |
| ATOM | 1862 | H16 | LIG | 97 | 18.431 | 30.499 | -19.906 | 1.00 | 0.00 |

TER

|      |      |    |     |    |        |        |        |      |      |
|------|------|----|-----|----|--------|--------|--------|------|------|
| ATOM | 1863 | S1 | LIG | 98 | 22.311 | 12.596 | 2.389  | 1.00 | 0.00 |
| ATOM | 1864 | S2 | LIG | 98 | 21.313 | 7.267  | 7.948  | 1.00 | 0.00 |
| ATOM | 1865 | O1 | LIG | 98 | 22.133 | 5.718  | 3.020  | 1.00 | 0.00 |
| ATOM | 1866 | H5 | LIG | 98 | 22.089 | 4.900  | 3.560  | 1.00 | 0.00 |
| ATOM | 1867 | O2 | LIG | 98 | 21.110 | 12.963 | 1.389  | 1.00 | 0.00 |
| ATOM | 1868 | H6 | LIG | 98 | 21.295 | 12.393 | 0.583  | 1.00 | 0.00 |
| ATOM | 1869 | O3 | LIG | 98 | 22.582 | 6.442  | 8.489  | 1.00 | 0.00 |
| ATOM | 1870 | H7 | LIG | 98 | 22.558 | 5.590  | 7.965  | 1.00 | 0.00 |
| ATOM | 1871 | O4 | LIG | 98 | 22.045 | 13.288 | 3.634  | 1.00 | 0.00 |
| ATOM | 1872 | O5 | LIG | 98 | 23.589 | 12.743 | 1.708  | 1.00 | 0.00 |
| ATOM | 1873 | O6 | LIG | 98 | 21.351 | 8.565  | 8.589  | 1.00 | 0.00 |
| ATOM | 1874 | O7 | LIG | 98 | 20.123 | 6.431  | 8.007  | 1.00 | 0.00 |
| ATOM | 1875 | O8 | LIG | 98 | 23.801 | 10.853 | -6.329 | 1.00 | 0.00 |
| ATOM | 1876 | O9 | LIG | 98 | 22.442 | 12.544 | -6.379 | 1.00 | 0.00 |
| ATOM | 1877 | N1 | LIG | 98 | 22.175 | 7.502  | 1.056  | 1.00 | 0.00 |
| ATOM | 1878 | H3 | LIG | 98 | 22.224 | 6.522  | 1.287  | 1.00 | 0.00 |
| ATOM | 1879 | H4 | LIG | 98 | 22.281 | 7.823  | 0.106  | 1.00 | 0.00 |
| ATOM | 1880 | N2 | LIG | 98 | 22.290 | 9.984  | 0.283  | 1.00 | 0.00 |
| ATOM | 1881 | N3 | LIG | 98 | 21.923 | 5.047  | 5.466  | 1.00 | 0.00 |
| ATOM | 1882 | N4 | LIG | 98 | 22.020 | 11.089 | -0.270 | 1.00 | 0.00 |
| ATOM | 1883 | N5 | LIG | 98 | 22.127 | 4.569  | 6.615  | 1.00 | 0.00 |
| ATOM | 1884 | N6 | LIG | 98 | 23.026 | 11.640 | -5.799 | 1.00 | 0.00 |

|      |      |     |     |    |        |        |        |      |      |
|------|------|-----|-----|----|--------|--------|--------|------|------|
| ATOM | 1885 | C1  | LIG | 98 | 22.000 | 8.075  | 3.416  | 1.00 | 0.00 |
| ATOM | 1886 | C2  | LIG | 98 | 21.882 | 9.111  | 4.386  | 1.00 | 0.00 |
| ATOM | 1887 | C3  | LIG | 98 | 22.122 | 8.435  | 2.022  | 1.00 | 0.00 |
| ATOM | 1888 | C4  | LIG | 98 | 22.057 | 10.815 | 2.670  | 1.00 | 0.00 |
| ATOM | 1889 | C5  | LIG | 98 | 21.924 | 10.470 | 3.985  | 1.00 | 0.00 |
| ATOM | 1890 | H1  | LIG | 98 | 21.874 | 11.247 | 4.737  | 1.00 | 0.00 |
| ATOM | 1891 | C6  | LIG | 98 | 21.997 | 6.738  | 3.892  | 1.00 | 0.00 |
| ATOM | 1892 | C7  | LIG | 98 | 21.719 | 7.494  | 6.194  | 1.00 | 0.00 |
| ATOM | 1893 | C8  | LIG | 98 | 21.726 | 8.792  | 5.756  | 1.00 | 0.00 |
| ATOM | 1894 | H2  | LIG | 98 | 21.598 | 9.591  | 6.475  | 1.00 | 0.00 |
| ATOM | 1895 | C9  | LIG | 98 | 22.145 | 9.819  | 1.643  | 1.00 | 0.00 |
| ATOM | 1896 | C10 | LIG | 98 | 21.879 | 6.421  | 5.266  | 1.00 | 0.00 |
| ATOM | 1897 | C11 | LIG | 98 | 22.305 | 11.170 | -1.647 | 1.00 | 0.00 |
| ATOM | 1898 | C12 | LIG | 98 | 22.096 | 3.167  | 6.734  | 1.00 | 0.00 |
| ATOM | 1899 | C13 | LIG | 98 | 23.193 | 10.304 | -2.307 | 1.00 | 0.00 |
| ATOM | 1900 | H8  | LIG | 98 | 23.709 | 9.539  | -1.743 | 1.00 | 0.00 |
| ATOM | 1901 | C14 | LIG | 98 | 21.683 | 12.210 | -2.354 | 1.00 | 0.00 |
| ATOM | 1902 | H9  | LIG | 98 | 21.020 | 12.888 | -1.832 | 1.00 | 0.00 |
| ATOM | 1903 | C15 | LIG | 98 | 23.427 | 10.456 | -3.663 | 1.00 | 0.00 |
| ATOM | 1904 | H10 | LIG | 98 | 24.112 | 9.811  | -4.195 | 1.00 | 0.00 |
| ATOM | 1905 | C16 | LIG | 98 | 21.909 | 12.363 | -3.714 | 1.00 | 0.00 |
| ATOM | 1906 | H11 | LIG | 98 | 21.433 | 13.150 | -4.281 | 1.00 | 0.00 |

|      |      |     |     |    |        |        |        |      |      |
|------|------|-----|-----|----|--------|--------|--------|------|------|
| ATOM | 1907 | C17 | LIG | 98 | 22.775 | 11.479 | -4.351 | 1.00 | 0.00 |
| ATOM | 1908 | C18 | LIG | 98 | 21.557 | 2.307  | 5.763  | 1.00 | 0.00 |
| ATOM | 1909 | H12 | LIG | 98 | 21.107 | 2.720  | 4.870  | 1.00 | 0.00 |
| ATOM | 1910 | C19 | LIG | 98 | 22.619 | 2.641  | 7.924  | 1.00 | 0.00 |
| ATOM | 1911 | H13 | LIG | 98 | 23.008 | 3.315  | 8.678  | 1.00 | 0.00 |
| ATOM | 1912 | C20 | LIG | 98 | 21.576 | 0.937  | 5.977  | 1.00 | 0.00 |
| ATOM | 1913 | H14 | LIG | 98 | 21.152 | 0.271  | 5.234  | 1.00 | 0.00 |
| ATOM | 1914 | C21 | LIG | 98 | 22.643 | 1.265  | 8.124  | 1.00 | 0.00 |
| ATOM | 1915 | H15 | LIG | 98 | 23.057 | 0.862  | 9.040  | 1.00 | 0.00 |
| ATOM | 1916 | C22 | LIG | 98 | 22.124 | 0.411  | 7.151  | 1.00 | 0.00 |
| ATOM | 1917 | H16 | LIG | 98 | 22.130 | -0.660 | 7.312  | 1.00 | 0.00 |

TER

|      |      |    |     |    |        |        |        |      |      |
|------|------|----|-----|----|--------|--------|--------|------|------|
| ATOM | 1918 | S1 | LIG | 99 | 3.476  | 0.375  | 18.444 | 1.00 | 0.00 |
| ATOM | 1919 | S2 | LIG | 99 | 0.580  | 7.563  | 17.944 | 1.00 | 0.00 |
| ATOM | 1920 | O1 | LIG | 99 | -1.780 | 3.657  | 15.388 | 1.00 | 0.00 |
| ATOM | 1921 | H5 | LIG | 99 | -2.331 | 4.455  | 15.237 | 1.00 | 0.00 |
| ATOM | 1922 | O2 | LIG | 99 | 4.352  | -0.234 | 17.246 | 1.00 | 0.00 |
| ATOM | 1923 | H6 | LIG | 99 | 3.685  | -0.766 | 16.716 | 1.00 | 0.00 |
| ATOM | 1924 | O3 | LIG | 99 | -0.759 | 7.933  | 18.751 | 1.00 | 0.00 |
| ATOM | 1925 | H7 | LIG | 99 | -1.488 | 7.822  | 18.075 | 1.00 | 0.00 |
| ATOM | 1926 | O4 | LIG | 99 | 4.345  | 1.264  | 19.189 | 1.00 | 0.00 |
| ATOM | 1927 | O5 | LIG | 99 | 2.740  | -0.688 | 19.114 | 1.00 | 0.00 |

|      |      |    |     |    |        |        |        |      |      |
|------|------|----|-----|----|--------|--------|--------|------|------|
| ATOM | 1928 | O6 | LIG | 99 | 1.669  | 7.596  | 18.898 | 1.00 | 0.00 |
| ATOM | 1929 | O7 | LIG | 99 | 0.637  | 8.330  | 16.709 | 1.00 | 0.00 |
| ATOM | 1930 | O8 | LIG | 99 | 0.065  | -6.936 | 14.421 | 1.00 | 0.00 |
| ATOM | 1931 | O9 | LIG | 99 | 2.209  | -7.192 | 14.198 | 1.00 | 0.00 |
| ATOM | 1932 | N1 | LIG | 99 | -0.651 | 1.258  | 15.291 | 1.00 | 0.00 |
| ATOM | 1933 | H3 | LIG | 99 | -1.424 | 1.823  | 14.980 | 1.00 | 0.00 |
| ATOM | 1934 | H4 | LIG | 99 | -0.584 | 0.281  | 15.052 | 1.00 | 0.00 |
| ATOM | 1935 | N2 | LIG | 99 | 1.145  | -0.412 | 16.163 | 1.00 | 0.00 |
| ATOM | 1936 | N3 | LIG | 99 | -1.866 | 6.092  | 16.124 | 1.00 | 0.00 |
| ATOM | 1937 | N4 | LIG | 99 | 2.109  | -1.230 | 16.212 | 1.00 | 0.00 |
| ATOM | 1938 | N5 | LIG | 99 | -2.216 | 7.200  | 16.614 | 1.00 | 0.00 |
| ATOM | 1939 | N6 | LIG | 99 | 1.220  | -6.532 | 14.486 | 1.00 | 0.00 |
| ATOM | 1940 | C1 | LIG | 99 | 0.216  | 3.123  | 16.595 | 1.00 | 0.00 |
| ATOM | 1941 | C2 | LIG | 99 | 1.234  | 3.592  | 17.474 | 1.00 | 0.00 |
| ATOM | 1942 | C3 | LIG | 99 | 0.246  | 1.743  | 16.167 | 1.00 | 0.00 |
| ATOM | 1943 | C4 | LIG | 99 | 2.254  | 1.394  | 17.559 | 1.00 | 0.00 |
| ATOM | 1944 | C5 | LIG | 99 | 2.232  | 2.704  | 17.947 | 1.00 | 0.00 |
| ATOM | 1945 | H1 | LIG | 99 | 2.975  | 3.064  | 18.646 | 1.00 | 0.00 |
| ATOM | 1946 | C6 | LIG | 99 | -0.777 | 4.054  | 16.198 | 1.00 | 0.00 |
| ATOM | 1947 | C7 | LIG | 99 | 0.288  | 5.832  | 17.484 | 1.00 | 0.00 |
| ATOM | 1948 | C8 | LIG | 99 | 1.254  | 4.947  | 17.884 | 1.00 | 0.00 |
| ATOM | 1949 | H2 | LIG | 99 | 2.057  | 5.296  | 18.521 | 1.00 | 0.00 |

|      |      |     |     |    |        |        |        |      |      |
|------|------|-----|-----|----|--------|--------|--------|------|------|
| ATOM | 1950 | C9  | LIG | 99 | 1.279  | 0.870  | 16.649 | 1.00 | 0.00 |
| ATOM | 1951 | C10 | LIG | 99 | -0.779 | 5.399  | 16.639 | 1.00 | 0.00 |
| ATOM | 1952 | C11 | LIG | 99 | 1.823  | -2.540 | 15.781 | 1.00 | 0.00 |
| ATOM | 1953 | C12 | LIG | 99 | -3.292 | 7.860  | 15.990 | 1.00 | 0.00 |
| ATOM | 1954 | C13 | LIG | 99 | 0.520  | -3.061 | 15.699 | 1.00 | 0.00 |
| ATOM | 1955 | H8  | LIG | 99 | -0.320 | -2.447 | 15.994 | 1.00 | 0.00 |
| ATOM | 1956 | C14 | LIG | 99 | 2.924  | -3.349 | 15.467 | 1.00 | 0.00 |
| ATOM | 1957 | H9  | LIG | 99 | 3.925  | -2.946 | 15.558 | 1.00 | 0.00 |
| ATOM | 1958 | C15 | LIG | 99 | 0.324  | -4.365 | 15.274 | 1.00 | 0.00 |
| ATOM | 1959 | H10 | LIG | 99 | -0.666 | -4.795 | 15.210 | 1.00 | 0.00 |
| ATOM | 1960 | C16 | LIG | 99 | 2.732  | -4.653 | 15.035 | 1.00 | 0.00 |
| ATOM | 1961 | H11 | LIG | 99 | 3.565  | -5.292 | 14.777 | 1.00 | 0.00 |
| ATOM | 1962 | C17 | LIG | 99 | 1.432  | -5.141 | 14.940 | 1.00 | 0.00 |
| ATOM | 1963 | C18 | LIG | 99 | -3.778 | 7.536  | 14.712 | 1.00 | 0.00 |
| ATOM | 1964 | H12 | LIG | 99 | -3.299 | 6.755  | 14.137 | 1.00 | 0.00 |
| ATOM | 1965 | C19 | LIG | 99 | -3.865 | 8.917  | 16.712 | 1.00 | 0.00 |
| ATOM | 1966 | H13 | LIG | 99 | -3.465 | 9.174  | 17.685 | 1.00 | 0.00 |
| ATOM | 1967 | C20 | LIG | 99 | -4.846 | 8.247  | 14.187 | 1.00 | 0.00 |
| ATOM | 1968 | H14 | LIG | 99 | -5.217 | 8.007  | 13.197 | 1.00 | 0.00 |
| ATOM | 1969 | C21 | LIG | 99 | -4.942 | 9.617  | 16.180 | 1.00 | 0.00 |
| ATOM | 1970 | H15 | LIG | 99 | -5.388 | 10.426 | 16.744 | 1.00 | 0.00 |
| ATOM | 1971 | C22 | LIG | 99 | -5.435 | 9.283  | 14.919 | 1.00 | 0.00 |

|      |      |     |     |    |        |       |        |      |      |
|------|------|-----|-----|----|--------|-------|--------|------|------|
| ATOM | 1972 | H16 | LIG | 99 | -6.266 | 9.837 | 14.499 | 1.00 | 0.00 |
|------|------|-----|-----|----|--------|-------|--------|------|------|

TER

|      |      |    |     |     |       |        |       |      |      |
|------|------|----|-----|-----|-------|--------|-------|------|------|
| ATOM | 1973 | S1 | LIG | 100 | 6.446 | 26.926 | 8.406 | 1.00 | 0.00 |
|------|------|----|-----|-----|-------|--------|-------|------|------|

|      |      |    |     |     |       |        |        |      |      |
|------|------|----|-----|-----|-------|--------|--------|------|------|
| ATOM | 1974 | S2 | LIG | 100 | 2.893 | 25.995 | 15.248 | 1.00 | 0.00 |
|------|------|----|-----|-----|-------|--------|--------|------|------|

|      |      |    |     |     |       |        |        |      |      |
|------|------|----|-----|-----|-------|--------|--------|------|------|
| ATOM | 1975 | O1 | LIG | 100 | 1.036 | 23.522 | 11.030 | 1.00 | 0.00 |
|------|------|----|-----|-----|-------|--------|--------|------|------|

|      |      |    |     |     |       |        |        |      |      |
|------|------|----|-----|-----|-------|--------|--------|------|------|
| ATOM | 1976 | H5 | LIG | 100 | 0.483 | 23.228 | 11.785 | 1.00 | 0.00 |
|------|------|----|-----|-----|-------|--------|--------|------|------|

|      |      |    |     |     |       |        |       |      |      |
|------|------|----|-----|-----|-------|--------|-------|------|------|
| ATOM | 1977 | O2 | LIG | 100 | 5.832 | 27.911 | 7.298 | 1.00 | 0.00 |
|------|------|----|-----|-----|-------|--------|-------|------|------|

|      |      |    |     |     |       |        |       |      |      |
|------|------|----|-----|-----|-------|--------|-------|------|------|
| ATOM | 1978 | H6 | LIG | 100 | 5.307 | 27.296 | 6.704 | 1.00 | 0.00 |
|------|------|----|-----|-----|-------|--------|-------|------|------|

|      |      |    |     |     |       |        |        |      |      |
|------|------|----|-----|-----|-------|--------|--------|------|------|
| ATOM | 1979 | O3 | LIG | 100 | 3.081 | 24.618 | 16.055 | 1.00 | 0.00 |
|------|------|----|-----|-----|-------|--------|--------|------|------|

|      |      |    |     |     |       |        |        |      |      |
|------|------|----|-----|-----|-------|--------|--------|------|------|
| ATOM | 1980 | H7 | LIG | 100 | 2.276 | 24.079 | 15.804 | 1.00 | 0.00 |
|------|------|----|-----|-----|-------|--------|--------|------|------|

|      |      |    |     |     |       |        |       |      |      |
|------|------|----|-----|-----|-------|--------|-------|------|------|
| ATOM | 1981 | O4 | LIG | 100 | 7.120 | 27.759 | 9.381 | 1.00 | 0.00 |
|------|------|----|-----|-----|-------|--------|-------|------|------|

|      |      |    |     |     |       |        |       |      |      |
|------|------|----|-----|-----|-------|--------|-------|------|------|
| ATOM | 1982 | O5 | LIG | 100 | 7.137 | 25.819 | 7.760 | 1.00 | 0.00 |
|------|------|----|-----|-----|-------|--------|-------|------|------|

|      |      |    |     |     |       |        |        |      |      |
|------|------|----|-----|-----|-------|--------|--------|------|------|
| ATOM | 1983 | O6 | LIG | 100 | 4.086 | 26.784 | 15.479 | 1.00 | 0.00 |
|------|------|----|-----|-----|-------|--------|--------|------|------|

|      |      |    |     |     |       |        |        |      |      |
|------|------|----|-----|-----|-------|--------|--------|------|------|
| ATOM | 1984 | O7 | LIG | 100 | 1.568 | 26.538 | 15.506 | 1.00 | 0.00 |
|------|------|----|-----|-----|-------|--------|--------|------|------|

|      |      |    |     |     |       |        |       |      |      |
|------|------|----|-----|-----|-------|--------|-------|------|------|
| ATOM | 1985 | O8 | LIG | 100 | 3.973 | 23.050 | 0.651 | 1.00 | 0.00 |
|------|------|----|-----|-----|-------|--------|-------|------|------|

|      |      |    |     |     |       |        |       |      |      |
|------|------|----|-----|-----|-------|--------|-------|------|------|
| ATOM | 1986 | O9 | LIG | 100 | 4.530 | 25.062 | 0.054 | 1.00 | 0.00 |
|------|------|----|-----|-----|-------|--------|-------|------|------|

|      |      |    |     |     |       |        |       |      |      |
|------|------|----|-----|-----|-------|--------|-------|------|------|
| ATOM | 1987 | N1 | LIG | 100 | 2.036 | 24.053 | 8.630 | 1.00 | 0.00 |
|------|------|----|-----|-----|-------|--------|-------|------|------|

|      |      |    |     |     |       |        |       |      |      |
|------|------|----|-----|-----|-------|--------|-------|------|------|
| ATOM | 1988 | H3 | LIG | 100 | 1.340 | 23.535 | 9.141 | 1.00 | 0.00 |
|------|------|----|-----|-----|-------|--------|-------|------|------|

|      |      |    |     |     |       |        |       |      |      |
|------|------|----|-----|-----|-------|--------|-------|------|------|
| ATOM | 1989 | H4 | LIG | 100 | 2.139 | 23.950 | 7.632 | 1.00 | 0.00 |
|------|------|----|-----|-----|-------|--------|-------|------|------|

|      |      |    |     |     |       |        |       |      |      |
|------|------|----|-----|-----|-------|--------|-------|------|------|
| ATOM | 1990 | N2 | LIG | 100 | 3.897 | 25.132 | 7.165 | 1.00 | 0.00 |
|------|------|----|-----|-----|-------|--------|-------|------|------|

|      |      |    |     |     |       |        |        |      |      |
|------|------|----|-----|-----|-------|--------|--------|------|------|
| ATOM | 1991 | N3 | LIG | 100 | 0.929 | 23.818 | 13.555 | 1.00 | 0.00 |
|------|------|----|-----|-----|-------|--------|--------|------|------|

|      |      |    |     |     |       |        |       |      |      |
|------|------|----|-----|-----|-------|--------|-------|------|------|
| ATOM | 1992 | N4 | LIG | 100 | 4.495 | 25.836 | 6.300 | 1.00 | 0.00 |
|------|------|----|-----|-----|-------|--------|-------|------|------|



|      |      |     |     |     |        |        |        |      |      |
|------|------|-----|-----|-----|--------|--------|--------|------|------|
| ATOM | 1993 | N5  | LIG | 100 | 0.922  | 23.622 | 14.801 | 1.00 | 0.00 |
| ATOM | 1994 | N6  | LIG | 100 | 4.274  | 24.212 | 0.897  | 1.00 | 0.00 |
| ATOM | 1995 | C1  | LIG | 100 | 2.916  | 24.968 | 10.708 | 1.00 | 0.00 |
| ATOM | 1996 | C2  | LIG | 100 | 3.885  | 25.809 | 11.324 | 1.00 | 0.00 |
| ATOM | 1997 | C3  | LIG | 100 | 2.960  | 24.785 | 9.275  | 1.00 | 0.00 |
| ATOM | 1998 | C4  | LIG | 100 | 4.953  | 26.238 | 9.189  | 1.00 | 0.00 |
| ATOM | 1999 | C5  | LIG | 100 | 4.897  | 26.422 | 10.543 | 1.00 | 0.00 |
| ATOM | 2000 | H1  | LIG | 100 | 5.651  | 27.026 | 11.029 | 1.00 | 0.00 |
| ATOM | 2001 | C6  | LIG | 100 | 1.961  | 24.351 | 11.556 | 1.00 | 0.00 |
| ATOM | 2002 | C7  | LIG | 100 | 2.913  | 25.437 | 13.521 | 1.00 | 0.00 |
| ATOM | 2003 | C8  | LIG | 100 | 3.848  | 26.038 | 12.721 | 1.00 | 0.00 |
| ATOM | 2004 | H2  | LIG | 100 | 4.569  | 26.711 | 13.167 | 1.00 | 0.00 |
| ATOM | 2005 | C9  | LIG | 100 | 3.986  | 25.431 | 8.507  | 1.00 | 0.00 |
| ATOM | 2006 | C10 | LIG | 100 | 1.948  | 24.549 | 12.957 | 1.00 | 0.00 |
| ATOM | 2007 | C11 | LIG | 100 | 4.415  | 25.373 | 4.972  | 1.00 | 0.00 |
| ATOM | 2008 | C12 | LIG | 100 | -0.181 | 22.922 | 15.327 | 1.00 | 0.00 |
| ATOM | 2009 | C13 | LIG | 100 | 4.087  | 24.050 | 4.631  | 1.00 | 0.00 |
| ATOM | 2010 | H8  | LIG | 100 | 3.899  | 23.328 | 5.414  | 1.00 | 0.00 |
| ATOM | 2011 | C14 | LIG | 100 | 4.729  | 26.300 | 3.968  | 1.00 | 0.00 |
| ATOM | 2012 | H9  | LIG | 100 | 5.005  | 27.310 | 4.242  | 1.00 | 0.00 |
| ATOM | 2013 | C15 | LIG | 100 | 4.039  | 23.672 | 3.300  | 1.00 | 0.00 |
| ATOM | 2014 | H10 | LIG | 100 | 3.798  | 22.659 | 3.008  | 1.00 | 0.00 |

|      |      |     |     |     |        |        |        |      |      |
|------|------|-----|-----|-----|--------|--------|--------|------|------|
| ATOM | 2015 | C16 | LIG | 100 | 4.676  | 25.928 | 2.632  | 1.00 | 0.00 |
| ATOM | 2016 | H11 | LIG | 100 | 4.902  | 26.628 | 1.841  | 1.00 | 0.00 |
| ATOM | 2017 | C17 | LIG | 100 | 4.326  | 24.618 | 2.317  | 1.00 | 0.00 |
| ATOM | 2018 | C18 | LIG | 100 | -1.384 | 22.714 | 14.633 | 1.00 | 0.00 |
| ATOM | 2019 | H12 | LIG | 100 | -1.511 | 23.128 | 13.642 | 1.00 | 0.00 |
| ATOM | 2020 | C19 | LIG | 100 | -0.035 | 22.445 | 16.638 | 1.00 | 0.00 |
| ATOM | 2021 | H13 | LIG | 100 | 0.887  | 22.634 | 17.173 | 1.00 | 0.00 |
| ATOM | 2022 | C20 | LIG | 100 | -2.411 | 22.009 | 15.241 | 1.00 | 0.00 |
| ATOM | 2023 | H14 | LIG | 100 | -3.345 | 21.855 | 14.713 | 1.00 | 0.00 |
| ATOM | 2024 | C21 | LIG | 100 | -1.067 | 21.730 | 17.235 | 1.00 | 0.00 |
| ATOM | 2025 | H15 | LIG | 100 | -0.948 | 21.355 | 18.244 | 1.00 | 0.00 |
| ATOM | 2026 | C22 | LIG | 100 | -2.255 | 21.509 | 16.538 | 1.00 | 0.00 |
| ATOM | 2027 | H16 | LIG | 100 | -3.065 | 20.963 | 17.008 | 1.00 | 0.00 |
| TER  |      |     |     |     |        |        |        |      |      |
| END  |      |     |     |     |        |        |        |      |      |

**Table S:** The number of atoms present in the system of MO-SIs

|      |   |     |     |   |         |        |        |      |      |
|------|---|-----|-----|---|---------|--------|--------|------|------|
| ATOM | 1 | N   | PRO | 1 | -17.359 | 10.010 | -6.715 | 1.00 | 0.00 |
| ATOM | 2 | H2  | PRO | 1 | -17.714 | 9.080  | -6.543 | 1.00 | 0.00 |
| ATOM | 3 | H3  | PRO | 1 | -17.984 | 10.739 | -7.032 | 1.00 | 0.00 |
| ATOM | 4 | CD  | PRO | 1 | -16.754 | 10.558 | -5.480 | 1.00 | 0.00 |
| ATOM | 5 | HD2 | PRO | 1 | -16.740 | 9.782  | -4.716 | 1.00 | 0.00 |

|      |    |         |   |         |        |         |      |      |
|------|----|---------|---|---------|--------|---------|------|------|
| ATOM | 6  | HD3 PRO | 1 | -17.355 | 11.399 | -5.132  | 1.00 | 0.00 |
| ATOM | 7  | CG PRO  | 1 | -15.368 | 10.978 | -5.906  | 1.00 | 0.00 |
| ATOM | 8  | HG2 PRO | 1 | -14.650 | 10.445 | -5.283  | 1.00 | 0.00 |
| ATOM | 9  | HG3 PRO | 1 | -15.274 | 12.050 | -5.732  | 1.00 | 0.00 |
| ATOM | 10 | CB PRO  | 1 | -15.178 | 10.649 | -7.378  | 1.00 | 0.00 |
| ATOM | 11 | HB2 PRO | 1 | -14.242 | 10.110 | -7.518  | 1.00 | 0.00 |
| ATOM | 12 | HB3 PRO | 1 | -15.175 | 11.549 | -7.994  | 1.00 | 0.00 |
| ATOM | 13 | CA PRO  | 1 | -16.362 | 9.750  | -7.769  | 1.00 | 0.00 |
| ATOM | 14 | HA PRO  | 1 | -16.800 | 10.058 | -8.719  | 1.00 | 0.00 |
| ATOM | 15 | C PRO   | 1 | -15.935 | 8.263  | -7.856  | 1.00 | 0.00 |
| ATOM | 16 | O PRO   | 1 | -16.209 | 7.474  | -6.932  | 1.00 | 0.00 |
| ATOM | 17 | N PRO   | 2 | -15.309 | 7.875  | -8.972  | 1.00 | 0.00 |
| ATOM | 18 | CD PRO  | 2 | -14.905 | 8.746  | -10.081 | 1.00 | 0.00 |
| ATOM | 19 | HD2 PRO | 2 | -14.142 | 9.438  | -9.724  | 1.00 | 0.00 |
| ATOM | 20 | HD3 PRO | 2 | -15.775 | 9.309  | -10.419 | 1.00 | 0.00 |
| ATOM | 21 | CG PRO  | 2 | -14.394 | 7.822  | -11.117 | 1.00 | 0.00 |
| ATOM | 22 | HG2 PRO | 2 | -13.382 | 8.132  | -11.376 | 1.00 | 0.00 |
| ATOM | 23 | HG3 PRO | 2 | -15.036 | 7.910  | -11.994 | 1.00 | 0.00 |
| ATOM | 24 | CB PRO  | 2 | -14.417 | 6.451  | -10.585 | 1.00 | 0.00 |
| ATOM | 25 | HB2 PRO | 2 | -13.403 | 6.055  | -10.633 | 1.00 | 0.00 |
| ATOM | 26 | HB3 PRO | 2 | -15.086 | 5.806  | -11.154 | 1.00 | 0.00 |
| ATOM | 27 | CA PRO  | 2 | -14.874 | 6.525  | -9.141  | 1.00 | 0.00 |

|      |    |      |     |   |         |       |         |      |      |
|------|----|------|-----|---|---------|-------|---------|------|------|
| ATOM | 28 | HA   | PRO | 2 | -15.723 | 5.867 | -8.954  | 1.00 | 0.00 |
| ATOM | 29 | C    | PRO | 2 | -13.731 | 6.167 | -8.187  | 1.00 | 0.00 |
| ATOM | 30 | O    | PRO | 2 | -12.988 | 6.987 | -7.737  | 1.00 | 0.00 |
| ATOM | 31 | N    | THR | 3 | -13.582 | 4.885 | -7.960  | 1.00 | 0.00 |
| ATOM | 32 | H    | THR | 3 | -14.094 | 4.192 | -8.487  | 1.00 | 0.00 |
| ATOM | 33 | CA   | THR | 3 | -12.682 | 4.434 | -6.935  | 1.00 | 0.00 |
| ATOM | 34 | HA   | THR | 3 | -13.015 | 4.877 | -5.996  | 1.00 | 0.00 |
| ATOM | 35 | CB   | THR | 3 | -12.793 | 2.907 | -6.823  | 1.00 | 0.00 |
| ATOM | 36 | HB   | THR | 3 | -12.500 | 2.463 | -7.774  | 1.00 | 0.00 |
| ATOM | 37 | CG2  | THR | 3 | -11.921 | 2.397 | -5.754  | 1.00 | 0.00 |
| ATOM | 38 | HG21 | THR | 3 | -12.214 | 2.841 | -4.803  | 1.00 | 0.00 |
| ATOM | 39 | HG22 | THR | 3 | -12.016 | 1.313 | -5.693  | 1.00 | 0.00 |
| ATOM | 40 | HG23 | THR | 3 | -10.886 | 2.659 | -5.973  | 1.00 | 0.00 |
| ATOM | 41 | OG1  | THR | 3 | -14.150 | 2.600 | -6.424  | 1.00 | 0.00 |
| ATOM | 42 | HG1  | THR | 3 | -14.253 | 1.649 | -6.345  | 1.00 | 0.00 |
| ATOM | 43 | C    | THR | 3 | -11.263 | 4.796 | -7.230  | 1.00 | 0.00 |
| ATOM | 44 | O    | THR | 3 | -10.561 | 5.254 | -6.348  | 1.00 | 0.00 |
| ATOM | 45 | N    | LEU | 4 | -10.846 | 4.604 | -8.479  | 1.00 | 0.00 |
| ATOM | 46 | H    | LEU | 4 | -11.401 | 4.218 | -9.230  | 1.00 | 0.00 |
| ATOM | 47 | CA   | LEU | 4 | -9.427  | 4.926 | -8.749  | 1.00 | 0.00 |
| ATOM | 48 | HA   | LEU | 4 | -8.811  | 4.395 | -8.024  | 1.00 | 0.00 |
| ATOM | 49 | CB   | LEU | 4 | -8.973  | 4.535 | -10.157 | 1.00 | 0.00 |

|      |    |          |   |         |        |         |      |      |
|------|----|----------|---|---------|--------|---------|------|------|
| ATOM | 50 | HB2 LEU  | 4 | -9.145  | 3.459  | -10.182 | 1.00 | 0.00 |
| ATOM | 51 | HB3 LEU  | 4 | -9.629  | 5.024  | -10.877 | 1.00 | 0.00 |
| ATOM | 52 | CG LEU   | 4 | -7.539  | 4.822  | -10.510 | 1.00 | 0.00 |
| ATOM | 53 | HG LEU   | 4 | -7.396  | 5.898  | -10.408 | 1.00 | 0.00 |
| ATOM | 54 | CD1 LEU  | 4 | -6.527  | 4.096  | -9.654  | 1.00 | 0.00 |
| ATOM | 55 | HD11 LEU | 4 | -6.670  | 3.020  | -9.756  | 1.00 | 0.00 |
| ATOM | 56 | HD12 LEU | 4 | -5.521  | 4.361  | -9.977  | 1.00 | 0.00 |
| ATOM | 57 | HD13 LEU | 4 | -6.661  | 4.383  | -8.611  | 1.00 | 0.00 |
| ATOM | 58 | CD2 LEU  | 4 | -7.380  | 4.473  | -11.954 | 1.00 | 0.00 |
| ATOM | 59 | HD21 LEU | 4 | -8.058  | 5.082  | -12.553 | 1.00 | 0.00 |
| ATOM | 60 | HD22 LEU | 4 | -6.353  | 4.664  | -12.264 | 1.00 | 0.00 |
| ATOM | 61 | HD23 LEU | 4 | -7.614  | 3.419  | -12.102 | 1.00 | 0.00 |
| ATOM | 62 | C LEU    | 4 | -9.157  | 6.403  | -8.535  | 1.00 | 0.00 |
| ATOM | 63 | O LEU    | 4 | -8.150  | 6.757  | -8.013  | 1.00 | 0.00 |
| ATOM | 64 | N GLN    | 5 | -10.083 | 7.251  | -8.929  | 1.00 | 0.00 |
| ATOM | 65 | H GLN    | 5 | -10.899 | 6.958  | -9.447  | 1.00 | 0.00 |
| ATOM | 66 | CA GLN   | 5 | -9.877  | 8.676  | -8.716  | 1.00 | 0.00 |
| ATOM | 67 | HA GLN   | 5 | -8.894  | 8.978  | -9.076  | 1.00 | 0.00 |
| ATOM | 68 | CB GLN   | 5 | -10.951 | 9.464  | -9.497  | 1.00 | 0.00 |
| ATOM | 69 | HB2 GLN  | 5 | -10.821 | 9.234  | -10.555 | 1.00 | 0.00 |
| ATOM | 70 | HB3 GLN  | 5 | -11.926 | 9.106  | -9.165  | 1.00 | 0.00 |
| ATOM | 71 | CG GLN   | 5 | -10.867 | 10.991 | -9.290  | 1.00 | 0.00 |

|      |    |          |   |         |        |         |      |      |
|------|----|----------|---|---------|--------|---------|------|------|
| ATOM | 72 | HG2 GLN  | 5 | -10.817 | 11.247 | -8.232  | 1.00 | 0.00 |
| ATOM | 73 | HG3 GLN  | 5 | -9.955  | 11.322 | -9.787  | 1.00 | 0.00 |
| ATOM | 74 | CD GLN   | 5 | -12.048 | 11.719 | -9.910  | 1.00 | 0.00 |
| ATOM | 75 | OE1 GLN  | 5 | -12.682 | 11.214 | -10.877 | 1.00 | 0.00 |
| ATOM | 76 | NE2 GLN  | 5 | -12.399 | 12.881 | -9.325  | 1.00 | 0.00 |
| ATOM | 77 | HE21 GLN | 5 | -13.177 | 13.413 | -9.691  | 1.00 | 0.00 |
| ATOM | 78 | HE22 GLN | 5 | -11.884 | 13.216 | -8.524  | 1.00 | 0.00 |
| ATOM | 79 | C GLN    | 5 | -9.851  | 9.057  | -7.225  | 1.00 | 0.00 |
| ATOM | 80 | O GLN    | 5 | -8.983  | 9.832  | -6.806  | 1.00 | 0.00 |
| ATOM | 81 | N ARG    | 6 | -10.642 | 8.345  | -6.388  | 1.00 | 0.00 |
| ATOM | 82 | H ARG    | 6 | -11.268 | 7.646  | -6.762  | 1.00 | 0.00 |
| ATOM | 83 | CA ARG   | 6 | -10.648 | 8.573  | -4.989  | 1.00 | 0.00 |
| ATOM | 84 | HA ARG   | 6 | -10.768 | 9.639  | -4.792  | 1.00 | 0.00 |
| ATOM | 85 | CB ARG   | 6 | -11.785 | 7.829  | -4.330  | 1.00 | 0.00 |
| ATOM | 86 | HB2 ARG  | 6 | -11.692 | 6.792  | -4.652  | 1.00 | 0.00 |
| ATOM | 87 | HB3 ARG  | 6 | -11.604 | 7.894  | -3.257  | 1.00 | 0.00 |
| ATOM | 88 | CG ARG   | 6 | -13.182 | 8.329  | -4.637  | 1.00 | 0.00 |
| ATOM | 89 | HG2 ARG  | 6 | -13.151 | 9.419  | -4.662  | 1.00 | 0.00 |
| ATOM | 90 | HG3 ARG  | 6 | -13.466 | 7.952  | -5.620  | 1.00 | 0.00 |
| ATOM | 91 | CD ARG   | 6 | -14.235 | 7.861  | -3.574  | 1.00 | 0.00 |
| ATOM | 92 | HD2 ARG  | 6 | -14.098 | 8.484  | -2.691  | 1.00 | 0.00 |
| ATOM | 93 | HD3 ARG  | 6 | -15.223 | 8.045  | -3.998  | 1.00 | 0.00 |

|      |     |      |     |   |         |       |        |      |      |
|------|-----|------|-----|---|---------|-------|--------|------|------|
| ATOM | 94  | NE   | ARG | 6 | -14.150 | 6.443 | -3.171 | 1.00 | 0.00 |
| ATOM | 95  | HE   | ARG | 6 | -13.623 | 6.250 | -2.332 | 1.00 | 0.00 |
| ATOM | 96  | CZ   | ARG | 6 | -14.714 | 5.412 | -3.827 | 1.00 | 0.00 |
| ATOM | 97  | NH1  | ARG | 6 | -15.446 | 5.594 | -4.927 | 1.00 | 0.00 |
| ATOM | 98  | HH11 | ARG | 6 | -15.588 | 6.527 | -5.287 | 1.00 | 0.00 |
| ATOM | 99  | HH12 | ARG | 6 | -15.855 | 4.798 | -5.395 | 1.00 | 0.00 |
| ATOM | 100 | NH2  | ARG | 6 | -14.548 | 4.152 | -3.382 | 1.00 | 0.00 |
| ATOM | 101 | HH21 | ARG | 6 | -13.998 | 3.981 | -2.553 | 1.00 | 0.00 |
| ATOM | 102 | HH22 | ARG | 6 | -14.975 | 3.384 | -3.880 | 1.00 | 0.00 |
| ATOM | 103 | C    | ARG | 6 | -9.306  | 8.115 | -4.446 | 1.00 | 0.00 |
| ATOM | 104 | O    | ARG | 6 | -8.745  | 8.692 | -3.528 | 1.00 | 0.00 |
| ATOM | 105 | N    | CYX | 7 | -8.820  | 6.955 | -4.962 | 1.00 | 0.00 |
| ATOM | 106 | H    | CYX | 7 | -9.340  | 6.381 | -5.610 | 1.00 | 0.00 |
| ATOM | 107 | CA   | CYX | 7 | -7.526  | 6.491 | -4.522 | 1.00 | 0.00 |
| ATOM | 108 | HA   | CYX | 7 | -7.535  | 6.345 | -3.442 | 1.00 | 0.00 |
| ATOM | 109 | CB   | CYX | 7 | -7.167  | 5.131 | -5.208 | 1.00 | 0.00 |
| ATOM | 110 | HB2  | CYX | 7 | -7.783  | 4.337 | -4.786 | 1.00 | 0.00 |
| ATOM | 111 | HB3  | CYX | 7 | -7.353  | 5.204 | -6.280 | 1.00 | 0.00 |
| ATOM | 112 | SG   | CYX | 7 | -5.476  | 4.652 | -5.056 | 1.00 | 0.00 |
| ATOM | 113 | C    | CYX | 7 | -6.427  | 7.523 | -4.807 | 1.00 | 0.00 |
| ATOM | 114 | O    | CYX | 7 | -5.631  | 7.864 | -3.944 | 1.00 | 0.00 |
| ATOM | 115 | N    | CYX | 8 | -6.401  | 8.119 | -5.981 | 1.00 | 0.00 |

|      |     |     |     |   |         |        |        |      |      |
|------|-----|-----|-----|---|---------|--------|--------|------|------|
| ATOM | 116 | H   | CYX | 8 | -7.145  | 7.981  | -6.650 | 1.00 | 0.00 |
| ATOM | 117 | CA  | CYX | 8 | -5.321  | 9.010  | -6.333 | 1.00 | 0.00 |
| ATOM | 118 | HA  | CYX | 8 | -4.374  | 8.517  | -6.117 | 1.00 | 0.00 |
| ATOM | 119 | CB  | CYX | 8 | -5.342  | 9.391  | -7.778 | 1.00 | 0.00 |
| ATOM | 120 | HB2 | CYX | 8 | -6.324  | 9.789  | -8.035 | 1.00 | 0.00 |
| ATOM | 121 | HB3 | CYX | 8 | -4.583  | 10.150 | -7.965 | 1.00 | 0.00 |
| ATOM | 122 | SG  | CYX | 8 | -5.037  | 7.981  | -8.938 | 1.00 | 0.00 |
| ATOM | 123 | C   | CYX | 8 | -5.432  | 10.327 | -5.528 | 1.00 | 0.00 |
| ATOM | 124 | O   | CYX | 8 | -4.468  | 10.841 | -5.128 | 1.00 | 0.00 |
| ATOM | 125 | N   | ARG | 9 | -6.662  | 10.668 | -5.202 | 1.00 | 0.00 |
| ATOM | 126 | H   | ARG | 9 | -7.450  | 10.183 | -5.607 | 1.00 | 0.00 |
| ATOM | 127 | CA  | ARG | 9 | -6.935  | 11.844 | -4.296 | 1.00 | 0.00 |
| ATOM | 128 | HA  | ARG | 9 | -6.346  | 12.693 | -4.644 | 1.00 | 0.00 |
| ATOM | 129 | CB  | ARG | 9 | -8.388  | 12.246 | -4.268 | 1.00 | 0.00 |
| ATOM | 130 | HB2 | ARG | 9 | -8.691  | 12.564 | -5.266 | 1.00 | 0.00 |
| ATOM | 131 | HB3 | ARG | 9 | -8.990  | 11.391 | -3.962 | 1.00 | 0.00 |
| ATOM | 132 | CG  | ARG | 9 | -8.592  | 13.362 | -3.310 | 1.00 | 0.00 |
| ATOM | 133 | HG2 | ARG | 9 | -8.251  | 13.023 | -2.332 | 1.00 | 0.00 |
| ATOM | 134 | HG3 | ARG | 9 | -7.974  | 14.197 | -3.641 | 1.00 | 0.00 |
| ATOM | 135 | CD  | ARG | 9 | -10.061 | 13.819 | -3.211 | 1.00 | 0.00 |
| ATOM | 136 | HD2 | ARG | 9 | -10.121 | 14.507 | -2.368 | 1.00 | 0.00 |
| ATOM | 137 | HD3 | ARG | 9 | -10.287 | 14.356 | -4.133 | 1.00 | 0.00 |



|      |     |      |     |    |         |        |        |      |      |
|------|-----|------|-----|----|---------|--------|--------|------|------|
| ATOM | 138 | NE   | ARG | 9  | -11.056 | 12.765 | -3.027 | 1.00 | 0.00 |
| ATOM | 139 | HE   | ARG | 9  | -11.654 | 12.614 | -3.827 | 1.00 | 0.00 |
| ATOM | 140 | CZ   | ARG | 9  | -11.252 | 12.012 | -1.925 | 1.00 | 0.00 |
| ATOM | 141 | NH1  | ARG | 9  | -10.516 | 12.149 | -0.810 | 1.00 | 0.00 |
| ATOM | 142 | HH11 | ARG | 9  | -9.780  | 12.840 | -0.776 | 1.00 | 0.00 |
| ATOM | 143 | HH12 | ARG | 9  | -10.702 | 11.561 | -0.011 | 1.00 | 0.00 |
| ATOM | 144 | NH2  | ARG | 9  | -12.211 | 11.076 | -1.941 | 1.00 | 0.00 |
| ATOM | 145 | HH21 | ARG | 9  | -12.772 | 10.946 | -2.771 | 1.00 | 0.00 |
| ATOM | 146 | HH22 | ARG | 9  | -12.369 | 10.505 | -1.123 | 1.00 | 0.00 |
| ATOM | 147 | C    | ARG | 9  | -6.446  | 11.566 | -2.887 | 1.00 | 0.00 |
| ATOM | 148 | O    | ARG | 9  | -5.670  | 12.304 | -2.294 | 1.00 | 0.00 |
| ATOM | 149 | N    | GLN | 10 | -6.717  | 10.360 | -2.326 | 1.00 | 0.00 |
| ATOM | 150 | H    | GLN | 10 | -7.311  | 9.658  | -2.745 | 1.00 | 0.00 |
| ATOM | 151 | CA   | GLN | 10 | -6.170  | 10.101 | -1.017 | 1.00 | 0.00 |
| ATOM | 152 | HA   | GLN | 10 | -6.409  | 10.909 | -0.326 | 1.00 | 0.00 |
| ATOM | 153 | CB   | GLN | 10 | -6.809  | 8.783  | -0.483 | 1.00 | 0.00 |
| ATOM | 154 | HB2  | GLN | 10 | -6.496  | 8.003  | -1.177 | 1.00 | 0.00 |
| ATOM | 155 | HB3  | GLN | 10 | -6.351  | 8.609  | 0.490  | 1.00 | 0.00 |
| ATOM | 156 | CG   | GLN | 10 | -8.307  | 8.758  | -0.344 | 1.00 | 0.00 |
| ATOM | 157 | HG2  | GLN | 10 | -8.423  | 9.352  | 0.563  | 1.00 | 0.00 |
| ATOM | 158 | HG3  | GLN | 10 | -8.793  | 9.268  | -1.176 | 1.00 | 0.00 |
| ATOM | 159 | CD   | GLN | 10 | -8.995  | 7.397  | -0.132 | 1.00 | 0.00 |

|      |     |      |     |    |         |        |        |      |      |
|------|-----|------|-----|----|---------|--------|--------|------|------|
| ATOM | 160 | OE1  | GLN | 10 | -8.445  | 6.312  | -0.328 | 1.00 | 0.00 |
| ATOM | 161 | NE2  | GLN | 10 | -10.275 | 7.484  | 0.126  | 1.00 | 0.00 |
| ATOM | 162 | HE21 | GLN | 10 | -10.814 | 6.644  | 0.280  | 1.00 | 0.00 |
| ATOM | 163 | HE22 | GLN | 10 | -10.718 | 8.391  | 0.169  | 1.00 | 0.00 |
| ATOM | 164 | C    | GLN | 10 | -4.735  | 9.997  | -0.920 | 1.00 | 0.00 |
| ATOM | 165 | O    | GLN | 10 | -4.057  | 10.497 | -0.073 | 1.00 | 0.00 |
| ATOM | 166 | N    | LEU | 11 | -4.125  | 9.368  | -1.973 | 1.00 | 0.00 |
| ATOM | 167 | H    | LEU | 11 | -4.702  | 8.880  | -2.644 | 1.00 | 0.00 |
| ATOM | 168 | CA   | LEU | 11 | -2.712  | 9.236  | -2.076 | 1.00 | 0.00 |
| ATOM | 169 | HA   | LEU | 11 | -2.297  | 8.917  | -1.120 | 1.00 | 0.00 |
| ATOM | 170 | CB   | LEU | 11 | -2.354  | 8.184  | -3.144 | 1.00 | 0.00 |
| ATOM | 171 | HB2  | LEU | 11 | -2.973  | 7.319  | -2.906 | 1.00 | 0.00 |
| ATOM | 172 | HB3  | LEU | 11 | -2.641  | 8.578  | -4.119 | 1.00 | 0.00 |
| ATOM | 173 | CG   | LEU | 11 | -0.936  | 7.781  | -3.175 | 1.00 | 0.00 |
| ATOM | 174 | HG   | LEU | 11 | -0.345  | 8.683  | -3.335 | 1.00 | 0.00 |
| ATOM | 175 | CD1  | LEU | 11 | -0.472  | 7.090  | -1.904 | 1.00 | 0.00 |
| ATOM | 176 | HD11 | LEU | 11 | -1.063  | 6.188  | -1.744 | 1.00 | 0.00 |
| ATOM | 177 | HD12 | LEU | 11 | 0.580   | 6.823  | -1.999 | 1.00 | 0.00 |
| ATOM | 178 | HD13 | LEU | 11 | -0.600  | 7.763  | -1.057 | 1.00 | 0.00 |
| ATOM | 179 | CD2  | LEU | 11 | -0.689  | 6.852  | -4.356 | 1.00 | 0.00 |
| ATOM | 180 | HD21 | LEU | 11 | -0.937  | 7.369  | -5.284 | 1.00 | 0.00 |
| ATOM | 181 | HD22 | LEU | 11 | 0.360   | 6.558  | -4.374 | 1.00 | 0.00 |

|      |     |      |     |    |        |        |        |      |      |
|------|-----|------|-----|----|--------|--------|--------|------|------|
| ATOM | 182 | HD23 | LEU | 11 | -1.314 | 5.964  | -4.258 | 1.00 | 0.00 |
| ATOM | 183 | C    | LEU | 11 | -1.983 | 10.542 | -2.282 | 1.00 | 0.00 |
| ATOM | 184 | O    | LEU | 11 | -0.915 | 10.752 | -1.788 | 1.00 | 0.00 |
| ATOM | 185 | N    | ARG | 12 | -2.665 | 11.384 | -3.050 | 1.00 | 0.00 |
| ATOM | 186 | H    | ARG | 12 | -3.563 | 11.162 | -3.456 | 1.00 | 0.00 |
| ATOM | 187 | CA   | ARG | 12 | -2.064 | 12.733 | -3.341 | 1.00 | 0.00 |
| ATOM | 188 | HA   | ARG | 12 | -1.073 | 12.609 | -3.776 | 1.00 | 0.00 |
| ATOM | 189 | CB   | ARG | 12 | -2.912 | 13.487 | -4.301 | 1.00 | 0.00 |
| ATOM | 190 | HB2  | ARG | 12 | -2.875 | 12.981 | -5.266 | 1.00 | 0.00 |
| ATOM | 191 | HB3  | ARG | 12 | -3.937 | 13.487 | -3.931 | 1.00 | 0.00 |
| ATOM | 192 | CG   | ARG | 12 | -2.433 | 14.918 | -4.462 | 1.00 | 0.00 |
| ATOM | 193 | HG2  | ARG | 12 | -2.473 | 15.379 | -3.475 | 1.00 | 0.00 |
| ATOM | 194 | HG3  | ARG | 12 | -1.398 | 14.870 | -4.799 | 1.00 | 0.00 |
| ATOM | 195 | CD   | ARG | 12 | -3.239 | 15.742 | -5.434 | 1.00 | 0.00 |
| ATOM | 196 | HD2  | ARG | 12 | -2.798 | 16.739 | -5.444 | 1.00 | 0.00 |
| ATOM | 197 | HD3  | ARG | 12 | -3.117 | 15.282 | -6.415 | 1.00 | 0.00 |
| ATOM | 198 | NE   | ARG | 12 | -4.614 | 15.861 | -5.160 | 1.00 | 0.00 |
| ATOM | 199 | HE   | ARG | 12 | -5.259 | 15.315 | -5.714 | 1.00 | 0.00 |
| ATOM | 200 | CZ   | ARG | 12 | -5.087 | 16.564 | -4.168 | 1.00 | 0.00 |
| ATOM | 201 | NH1  | ARG | 12 | -4.281 | 17.257 | -3.407 | 1.00 | 0.00 |
| ATOM | 202 | HH11 | ARG | 12 | -3.288 | 17.248 | -3.589 | 1.00 | 0.00 |
| ATOM | 203 | HH12 | ARG | 12 | -4.656 | 17.799 | -2.641 | 1.00 | 0.00 |

|      |     |      |     |    |        |        |        |      |      |
|------|-----|------|-----|----|--------|--------|--------|------|------|
| ATOM | 204 | NH2  | ARG | 12 | -6.325 | 16.657 | -3.996 | 1.00 | 0.00 |
| ATOM | 205 | HH21 | ARG | 12 | -6.957 | 16.186 | -4.628 | 1.00 | 0.00 |
| ATOM | 206 | HH22 | ARG | 12 | -6.686 | 17.203 | -3.226 | 1.00 | 0.00 |
| ATOM | 207 | C    | ARG | 12 | -1.961 | 13.489 | -2.018 | 1.00 | 0.00 |
| ATOM | 208 | O    | ARG | 12 | -0.947 | 14.091 | -1.804 | 1.00 | 0.00 |
| ATOM | 209 | N    | ASN | 13 | -2.929 | 13.281 | -1.140 | 1.00 | 0.00 |
| ATOM | 210 | H    | ASN | 13 | -3.778 | 12.819 | -1.433 | 1.00 | 0.00 |
| ATOM | 211 | CA   | ASN | 13 | -2.916 | 13.978 | 0.222  | 1.00 | 0.00 |
| ATOM | 212 | HA   | ASN | 13 | -2.509 | 14.985 | 0.123  | 1.00 | 0.00 |
| ATOM | 213 | CB   | ASN | 13 | -4.292 | 14.075 | 0.752  | 1.00 | 0.00 |
| ATOM | 214 | HB2  | ASN | 13 | -4.841 | 13.136 | 0.679  | 1.00 | 0.00 |
| ATOM | 215 | HB3  | ASN | 13 | -4.171 | 14.344 | 1.801  | 1.00 | 0.00 |
| ATOM | 216 | CG   | ASN | 13 | -5.083 | 15.143 | 0.075  | 1.00 | 0.00 |
| ATOM | 217 | OD1  | ASN | 13 | -4.865 | 16.301 | 0.333  | 1.00 | 0.00 |
| ATOM | 218 | ND2  | ASN | 13 | -5.903 | 14.786 | -0.832 | 1.00 | 0.00 |
| ATOM | 219 | HD21 | ASN | 13 | -6.456 | 15.483 | -1.312 | 1.00 | 0.00 |
| ATOM | 220 | HD22 | ASN | 13 | -5.997 | 13.809 | -1.067 | 1.00 | 0.00 |
| ATOM | 221 | C    | ASN | 13 | -1.879 | 13.476 | 1.196  | 1.00 | 0.00 |
| ATOM | 222 | O    | ASN | 13 | -1.623 | 14.051 | 2.282  | 1.00 | 0.00 |
| ATOM | 223 | N    | VAL | 14 | -1.297 | 12.286 | 0.912  | 1.00 | 0.00 |
| ATOM | 224 | H    | VAL | 14 | -1.753 | 11.666 | 0.258  | 1.00 | 0.00 |
| ATOM | 225 | CA   | VAL | 14 | -0.164 | 11.836 | 1.561  | 1.00 | 0.00 |

|      |     |      |     |    |        |        |        |      |      |
|------|-----|------|-----|----|--------|--------|--------|------|------|
| ATOM | 226 | HA   | VAL | 14 | -0.025 | 12.174 | 2.588  | 1.00 | 0.00 |
| ATOM | 227 | CB   | VAL | 14 | -0.114 | 10.243 | 1.538  | 1.00 | 0.00 |
| ATOM | 228 | HB   | VAL | 14 | -0.190 | 9.890  | 0.510  | 1.00 | 0.00 |
| ATOM | 229 | CG1  | VAL | 14 | 1.214  | 9.770  | 2.145  | 1.00 | 0.00 |
| ATOM | 230 | HG11 | VAL | 14 | 1.290  | 10.123 | 3.173  | 1.00 | 0.00 |
| ATOM | 231 | HG12 | VAL | 14 | 1.252  | 8.681  | 2.131  | 1.00 | 0.00 |
| ATOM | 232 | HG13 | VAL | 14 | 2.043  | 10.170 | 1.562  | 1.00 | 0.00 |
| ATOM | 233 | CG2  | VAL | 14 | -1.334 | 9.707  | 2.153  | 1.00 | 0.00 |
| ATOM | 234 | HG21 | VAL | 14 | -2.205 | 10.052 | 1.594  | 1.00 | 0.00 |
| ATOM | 235 | HG22 | VAL | 14 | -1.301 | 8.618  | 2.138  | 1.00 | 0.00 |
| ATOM | 236 | HG23 | VAL | 14 | -1.404 | 10.054 | 3.184  | 1.00 | 0.00 |
| ATOM | 237 | C    | VAL | 14 | 1.145  | 12.459 | 0.994  | 1.00 | 0.00 |
| ATOM | 238 | O    | VAL | 14 | 1.311  | 12.583 | -0.222 | 1.00 | 0.00 |
| ATOM | 239 | N    | SER | 15 | 2.090  | 12.842 | 1.864  | 1.00 | 0.00 |
| ATOM | 240 | H    | SER | 15 | 1.984  | 12.665 | 2.852  | 1.00 | 0.00 |
| ATOM | 241 | CA   | SER | 15 | 3.336  | 13.444 | 1.398  | 1.00 | 0.00 |
| ATOM | 242 | HA   | SER | 15 | 3.116  | 14.376 | 0.876  | 1.00 | 0.00 |
| ATOM | 243 | CB   | SER | 15 | 4.261  | 13.744 | 2.553  | 1.00 | 0.00 |
| ATOM | 244 | HB2  | SER | 15 | 4.507  | 12.858 | 3.138  | 1.00 | 0.00 |
| ATOM | 245 | HB3  | SER | 15 | 5.180  | 14.239 | 2.240  | 1.00 | 0.00 |
| ATOM | 246 | OG   | SER | 15 | 3.506  | 14.617 | 3.330  | 1.00 | 0.00 |
| ATOM | 247 | HG   | SER | 15 | 4.011  | 14.875 | 4.104  | 1.00 | 0.00 |

|      |     |     |     |    |       |        |        |      |      |
|------|-----|-----|-----|----|-------|--------|--------|------|------|
| ATOM | 248 | C   | SER | 15 | 4.095 | 12.529 | 0.560  | 1.00 | 0.00 |
| ATOM | 249 | O   | SER | 15 | 4.101 | 11.303 | 0.853  | 1.00 | 0.00 |
| ATOM | 250 | N   | PRO | 16 | 4.727 | 13.012 | -0.504 | 1.00 | 0.00 |
| ATOM | 251 | CD  | PRO | 16 | 4.668 | 14.415 | -1.083 | 1.00 | 0.00 |
| ATOM | 252 | HD2 | PRO | 16 | 5.130 | 15.116 | -0.388 | 1.00 | 0.00 |
| ATOM | 253 | HD3 | PRO | 16 | 3.628 | 14.699 | -1.246 | 1.00 | 0.00 |
| ATOM | 254 | CG  | PRO | 16 | 5.442 | 14.286 | -2.380 | 1.00 | 0.00 |
| ATOM | 255 | HG2 | PRO | 16 | 6.012 | 15.199 | -2.551 | 1.00 | 0.00 |
| ATOM | 256 | HG3 | PRO | 16 | 4.742 | 14.137 | -3.203 | 1.00 | 0.00 |
| ATOM | 257 | CB  | PRO | 16 | 6.330 | 13.117 | -2.224 | 1.00 | 0.00 |
| ATOM | 258 | HB2 | PRO | 16 | 7.248 | 13.351 | -1.686 | 1.00 | 0.00 |
| ATOM | 259 | HB3 | PRO | 16 | 6.577 | 12.678 | -3.191 | 1.00 | 0.00 |
| ATOM | 260 | CA  | PRO | 16 | 5.475 | 12.130 | -1.400 | 1.00 | 0.00 |
| ATOM | 261 | HA  | PRO | 16 | 4.746 | 11.649 | -2.052 | 1.00 | 0.00 |
| ATOM | 262 | C   | PRO | 16 | 6.309 | 11.060 | -0.690 | 1.00 | 0.00 |
| ATOM | 263 | O   | PRO | 16 | 6.253 | 9.857  | -1.014 | 1.00 | 0.00 |
| ATOM | 264 | N   | PHE | 17 | 7.059 | 11.462 | 0.325  | 1.00 | 0.00 |
| ATOM | 265 | H   | PHE | 17 | 7.083 | 12.432 | 0.607  | 1.00 | 0.00 |
| ATOM | 266 | CA  | PHE | 17 | 7.956 | 10.512 | 1.008  | 1.00 | 0.00 |
| ATOM | 267 | HA  | PHE | 17 | 8.525 | 9.956  | 0.263  | 1.00 | 0.00 |
| ATOM | 268 | CB  | PHE | 17 | 8.945 | 11.240 | 1.942  | 1.00 | 0.00 |
| ATOM | 269 | HB2 | PHE | 17 | 9.740 | 11.666 | 1.330  | 1.00 | 0.00 |

|      |     |         |    |        |        |       |      |      |
|------|-----|---------|----|--------|--------|-------|------|------|
| ATOM | 270 | HB3 PHE | 17 | 8.457  | 12.035 | 2.507 | 1.00 | 0.00 |
| ATOM | 271 | CG PHE  | 17 | 9.622  | 10.326 | 2.966 | 1.00 | 0.00 |
| ATOM | 272 | CD1 PHE | 17 | 10.603 | 9.394  | 2.561 | 1.00 | 0.00 |
| ATOM | 273 | HD1 PHE | 17 | 10.899 | 9.348  | 1.513 | 1.00 | 0.00 |
| ATOM | 274 | CE1 PHE | 17 | 11.195 | 8.532  | 3.496 | 1.00 | 0.00 |
| ATOM | 275 | HE1 PHE | 17 | 11.952 | 7.817  | 3.175 | 1.00 | 0.00 |
| ATOM | 276 | CZ PHE  | 17 | 10.812 | 8.590  | 4.844 | 1.00 | 0.00 |
| ATOM | 277 | HZ PHE  | 17 | 11.278 | 7.920  | 5.566 | 1.00 | 0.00 |
| ATOM | 278 | CE2 PHE | 17 | 9.840  | 9.500  | 5.263 | 1.00 | 0.00 |
| ATOM | 279 | HE2 PHE | 17 | 9.542  | 9.542  | 6.311 | 1.00 | 0.00 |
| ATOM | 280 | CD2 PHE | 17 | 9.248  | 10.359 | 4.334 | 1.00 | 0.00 |
| ATOM | 281 | HD2 PHE | 17 | 8.486  | 11.069 | 4.656 | 1.00 | 0.00 |
| ATOM | 282 | C PHE   | 17 | 7.186  | 9.433  | 1.788 | 1.00 | 0.00 |
| ATOM | 283 | O PHE   | 17 | 7.763  | 8.390  | 2.097 | 1.00 | 0.00 |
| ATOM | 284 | N CYX   | 18 | 5.929  | 9.695  | 2.113 | 1.00 | 0.00 |
| ATOM | 285 | H CYX   | 18 | 5.523  | 10.560 | 1.785 | 1.00 | 0.00 |
| ATOM | 286 | CA CYX  | 18 | 5.108  | 8.809  | 2.890 | 1.00 | 0.00 |
| ATOM | 287 | HA CYX  | 18 | 5.762  | 8.165  | 3.477 | 1.00 | 0.00 |
| ATOM | 288 | CB CYX  | 18 | 4.185  | 9.510  | 3.810 | 1.00 | 0.00 |
| ATOM | 289 | HB2 CYX | 18 | 3.677  | 10.312 | 3.274 | 1.00 | 0.00 |
| ATOM | 290 | HB3 CYX | 18 | 3.447  | 8.805  | 4.192 | 1.00 | 0.00 |
| ATOM | 291 | SG CYX  | 18 | 5.233  | 10.225 | 5.195 | 1.00 | 0.00 |

|      |     |      |     |    |       |        |        |      |      |
|------|-----|------|-----|----|-------|--------|--------|------|------|
| ATOM | 292 | C    | CYX | 18 | 4.210 | 7.937  | 1.936  | 1.00 | 0.00 |
| ATOM | 293 | O    | CYX | 18 | 3.484 | 7.113  | 2.498  | 1.00 | 0.00 |
| ATOM | 294 | N    | ARG | 19 | 4.252 | 8.121  | 0.600  | 1.00 | 0.00 |
| ATOM | 295 | H    | ARG | 19 | 4.950 | 8.687  | 0.140  | 1.00 | 0.00 |
| ATOM | 296 | CA   | ARG | 19 | 3.232 | 7.485  | -0.218 | 1.00 | 0.00 |
| ATOM | 297 | HA   | ARG | 19 | 2.263 | 7.654  | 0.252  | 1.00 | 0.00 |
| ATOM | 298 | CB   | ARG | 19 | 3.179 | 8.006  | -1.624 | 1.00 | 0.00 |
| ATOM | 299 | HB2  | ARG | 19 | 4.190 | 8.108  | -2.019 | 1.00 | 0.00 |
| ATOM | 300 | HB3  | ARG | 19 | 2.611 | 7.319  | -2.252 | 1.00 | 0.00 |
| ATOM | 301 | CG   | ARG | 19 | 2.492 | 9.379  | -1.619 | 1.00 | 0.00 |
| ATOM | 302 | HG2  | ARG | 19 | 1.455 | 9.208  | -1.328 | 1.00 | 0.00 |
| ATOM | 303 | HG3  | ARG | 19 | 2.990 | 9.974  | -0.854 | 1.00 | 0.00 |
| ATOM | 304 | CD   | ARG | 19 | 2.528 | 10.109 | -2.916 | 1.00 | 0.00 |
| ATOM | 305 | HD2  | ARG | 19 | 3.561 | 10.236 | -3.239 | 1.00 | 0.00 |
| ATOM | 306 | HD3  | ARG | 19 | 1.978 | 9.547  | -3.671 | 1.00 | 0.00 |
| ATOM | 307 | NE   | ARG | 19 | 1.919 | 11.420 | -2.778 | 1.00 | 0.00 |
| ATOM | 308 | HE   | ARG | 19 | 1.224 | 11.504 | -2.050 | 1.00 | 0.00 |
| ATOM | 309 | CZ   | ARG | 19 | 2.227 | 12.492 | -3.479 | 1.00 | 0.00 |
| ATOM | 310 | NH1  | ARG | 19 | 3.175 | 12.462 | -4.403 | 1.00 | 0.00 |
| ATOM | 311 | HH11 | ARG | 19 | 3.676 | 11.604 | -4.580 | 1.00 | 0.00 |
| ATOM | 312 | HH12 | ARG | 19 | 3.392 | 13.298 | -4.927 | 1.00 | 0.00 |
| ATOM | 313 | NH2  | ARG | 19 | 1.517 | 13.624 | -3.275 | 1.00 | 0.00 |



|      |     |      |     |    |       |        |        |      |      |
|------|-----|------|-----|----|-------|--------|--------|------|------|
| ATOM | 314 | HH21 | ARG | 19 | 0.769 | 13.632 | -2.596 | 1.00 | 0.00 |
| ATOM | 315 | HH22 | ARG | 19 | 1.737 | 14.457 | -3.803 | 1.00 | 0.00 |
| ATOM | 316 | C    | ARG | 19 | 3.526 | 5.963  | -0.266 | 1.00 | 0.00 |
| ATOM | 317 | O    | ARG | 19 | 2.616 | 5.214  | -0.078 | 1.00 | 0.00 |
| ATOM | 318 | N    | CYX | 20 | 4.794 | 5.648  | -0.436 | 1.00 | 0.00 |
| ATOM | 319 | H    | CYX | 20 | 5.494 | 6.341  | -0.660 | 1.00 | 0.00 |
| ATOM | 320 | CA   | CYX | 20 | 5.174 | 4.173  | -0.546 | 1.00 | 0.00 |
| ATOM | 321 | HA   | CYX | 20 | 4.428 | 3.679  | -1.170 | 1.00 | 0.00 |
| ATOM | 322 | CB   | CYX | 20 | 6.538 | 3.932  | -1.143 | 1.00 | 0.00 |
| ATOM | 323 | HB2  | CYX | 20 | 7.287 | 4.481  | -0.572 | 1.00 | 0.00 |
| ATOM | 324 | HB3  | CYX | 20 | 6.766 | 2.867  | -1.112 | 1.00 | 0.00 |
| ATOM | 325 | SG   | CYX | 20 | 6.556 | 4.299  | -2.905 | 1.00 | 0.00 |
| ATOM | 326 | C    | CYX | 20 | 4.928 | 3.463  | 0.771  | 1.00 | 0.00 |
| ATOM | 327 | O    | CYX | 20 | 4.273 | 2.415  | 0.793  | 1.00 | 0.00 |
| ATOM | 328 | N    | PRO | 21 | 5.364 | 4.018  | 1.902  | 1.00 | 0.00 |
| ATOM | 329 | CD   | PRO | 21 | 6.453 | 4.995  | 2.069  | 1.00 | 0.00 |
| ATOM | 330 | HD2  | PRO | 21 | 6.128 | 5.967  | 1.695  | 1.00 | 0.00 |
| ATOM | 331 | HD3  | PRO | 21 | 7.326 | 4.664  | 1.507  | 1.00 | 0.00 |
| ATOM | 332 | CG   | PRO | 21 | 6.689 | 4.998  | 3.527  | 1.00 | 0.00 |
| ATOM | 333 | HG2  | PRO | 21 | 6.913 | 6.022  | 3.827  | 1.00 | 0.00 |
| ATOM | 334 | HG3  | PRO | 21 | 7.552 | 4.364  | 3.727  | 1.00 | 0.00 |
| ATOM | 335 | CB   | PRO | 21 | 5.539 | 4.508  | 4.185  | 1.00 | 0.00 |

|      |     |         |    |        |       |        |      |      |
|------|-----|---------|----|--------|-------|--------|------|------|
| ATOM | 336 | HB2 PRO | 21 | 4.808  | 5.293 | 4.380  | 1.00 | 0.00 |
| ATOM | 337 | HB3 PRO | 21 | 5.795  | 4.010 | 5.120  | 1.00 | 0.00 |
| ATOM | 338 | CA PRO  | 21 | 4.956  | 3.485 | 3.186  | 1.00 | 0.00 |
| ATOM | 339 | HA PRO  | 21 | 5.428  | 2.507 | 3.278  | 1.00 | 0.00 |
| ATOM | 340 | C PRO   | 21 | 3.476  | 3.346 | 3.384  | 1.00 | 0.00 |
| ATOM | 341 | O PRO   | 21 | 2.992  | 2.310 | 3.922  | 1.00 | 0.00 |
| ATOM | 342 | N SER   | 22 | 2.663  | 4.313 | 2.920  | 1.00 | 0.00 |
| ATOM | 343 | H SER   | 22 | 3.048  | 5.121 | 2.451  | 1.00 | 0.00 |
| ATOM | 344 | CA SER  | 22 | 1.298  | 4.272 | 3.142  | 1.00 | 0.00 |
| ATOM | 345 | HA SER  | 22 | 1.113  | 3.988 | 4.178  | 1.00 | 0.00 |
| ATOM | 346 | CB SER  | 22 | 0.634  | 5.633 | 2.880  | 1.00 | 0.00 |
| ATOM | 347 | HB2 SER | 22 | 0.916  | 6.035 | 1.906  | 1.00 | 0.00 |
| ATOM | 348 | HB3 SER | 22 | -0.452 | 5.567 | 2.944  | 1.00 | 0.00 |
| ATOM | 349 | OG SER  | 22 | 1.109  | 6.477 | 3.887  | 1.00 | 0.00 |
| ATOM | 350 | HG SER  | 22 | 0.727  | 7.352 | 3.778  | 1.00 | 0.00 |
| ATOM | 351 | C SER   | 22 | 0.594  | 3.149 | 2.276  | 1.00 | 0.00 |
| ATOM | 352 | O SER   | 22 | -0.343 | 2.581 | 2.721  | 1.00 | 0.00 |
| ATOM | 353 | N LEU   | 23 | 1.110  | 3.016 | 1.078  | 1.00 | 0.00 |
| ATOM | 354 | H LEU   | 23 | 1.851  | 3.640 | 0.790  | 1.00 | 0.00 |
| ATOM | 355 | CA LEU  | 23 | 0.628  | 2.010 | 0.112  | 1.00 | 0.00 |
| ATOM | 356 | HA LEU  | 23 | -0.451 | 2.133 | 0.017  | 1.00 | 0.00 |
| ATOM | 357 | CB LEU  | 23 | 1.244  | 2.106 | -1.254 | 1.00 | 0.00 |

|      |     |          |    |        |        |        |      |      |
|------|-----|----------|----|--------|--------|--------|------|------|
| ATOM | 358 | HB2 LEU  | 23 | 2.251  | 2.484  | -1.080 | 1.00 | 0.00 |
| ATOM | 359 | HB3 LEU  | 23 | 1.298  | 1.173  | -1.814 | 1.00 | 0.00 |
| ATOM | 360 | CG LEU   | 23 | 0.439  | 3.143  | -2.062 | 1.00 | 0.00 |
| ATOM | 361 | HG LEU   | 23 | 0.290  | 4.056  | -1.485 | 1.00 | 0.00 |
| ATOM | 362 | CD1 LEU  | 23 | 1.238  | 3.450  | -3.275 | 1.00 | 0.00 |
| ATOM | 363 | HD11 LEU | 23 | 1.386  | 2.538  | -3.853 | 1.00 | 0.00 |
| ATOM | 364 | HD12 LEU | 23 | 0.708  | 4.183  | -3.884 | 1.00 | 0.00 |
| ATOM | 365 | HD13 LEU | 23 | 2.206  | 3.855  | -2.980 | 1.00 | 0.00 |
| ATOM | 366 | CD2 LEU  | 23 | -0.941 | 2.712  | -2.335 | 1.00 | 0.00 |
| ATOM | 367 | HD21 LEU | 23 | -1.464 | 2.548  | -1.393 | 1.00 | 0.00 |
| ATOM | 368 | HD22 LEU | 23 | -1.457 | 3.484  | -2.907 | 1.00 | 0.00 |
| ATOM | 369 | HD23 LEU | 23 | -0.926 | 1.785  | -2.908 | 1.00 | 0.00 |
| ATOM | 370 | C LEU    | 23 | 0.960  | 0.646  | 0.774  | 1.00 | 0.00 |
| ATOM | 371 | O LEU    | 23 | 0.136  | -0.246 | 0.593  | 1.00 | 0.00 |
| ATOM | 372 | N ARG    | 24 | 2.121  | 0.485  | 1.338  | 1.00 | 0.00 |
| ATOM | 373 | H ARG    | 24 | 2.813  | 1.220  | 1.365  | 1.00 | 0.00 |
| ATOM | 374 | CA ARG   | 24 | 2.423  | -0.814 | 2.057  | 1.00 | 0.00 |
| ATOM | 375 | HA ARG   | 24 | 2.464  | -1.634 | 1.341  | 1.00 | 0.00 |
| ATOM | 376 | CB ARG   | 24 | 3.739  | -0.722 | 2.754  | 1.00 | 0.00 |
| ATOM | 377 | HB2 ARG  | 24 | 4.516  | -0.597 | 2.000  | 1.00 | 0.00 |
| ATOM | 378 | HB3 ARG  | 24 | 3.721  | 0.153  | 3.404  | 1.00 | 0.00 |
| ATOM | 379 | CG ARG   | 24 | 4.033  | -1.976 | 3.591  | 1.00 | 0.00 |

|      |     |          |    |        |        |       |      |      |
|------|-----|----------|----|--------|--------|-------|------|------|
| ATOM | 380 | HG2 ARG  | 24 | 3.269  | -2.070 | 4.362 | 1.00 | 0.00 |
| ATOM | 381 | HG3 ARG  | 24 | 4.000  | -2.849 | 2.939 | 1.00 | 0.00 |
| ATOM | 382 | CD ARG   | 24 | 5.402  | -1.883 | 4.243 | 1.00 | 0.00 |
| ATOM | 383 | HD2 ARG  | 24 | 5.388  | -1.020 | 4.909 | 1.00 | 0.00 |
| ATOM | 384 | HD3 ARG  | 24 | 5.547  | -2.791 | 4.828 | 1.00 | 0.00 |
| ATOM | 385 | NE ARG   | 24 | 6.521  | -1.740 | 3.316 | 1.00 | 0.00 |
| ATOM | 386 | HE ARG   | 24 | 6.799  | -0.795 | 3.090 | 1.00 | 0.00 |
| ATOM | 387 | CZ ARG   | 24 | 7.208  | -2.756 | 2.774 | 1.00 | 0.00 |
| ATOM | 388 | NH1 ARG  | 24 | 6.869  | -4.047 | 2.981 | 1.00 | 0.00 |
| ATOM | 389 | HH11 ARG | 24 | 6.073  | -4.270 | 3.561 | 1.00 | 0.00 |
| ATOM | 390 | HH12 ARG | 24 | 7.412  | -4.783 | 2.554 | 1.00 | 0.00 |
| ATOM | 391 | NH2 ARG  | 24 | 8.247  | -2.469 | 1.981 | 1.00 | 0.00 |
| ATOM | 392 | HH21 ARG | 24 | 8.493  | -1.505 | 1.806 | 1.00 | 0.00 |
| ATOM | 393 | HH22 ARG | 24 | 8.779  | -3.217 | 1.561 | 1.00 | 0.00 |
| ATOM | 394 | C ARG    | 24 | 1.368  | -1.038 | 3.158 | 1.00 | 0.00 |
| ATOM | 395 | O ARG    | 24 | 0.796  | -2.175 | 3.329 | 1.00 | 0.00 |
| ATOM | 396 | N GLN    | 25 | 1.062  | -0.014 | 3.954 | 1.00 | 0.00 |
| ATOM | 397 | H GLN    | 25 | 1.582  | 0.852  | 3.946 | 1.00 | 0.00 |
| ATOM | 398 | CA GLN   | 25 | -0.027 | -0.170 | 4.948 | 1.00 | 0.00 |
| ATOM | 399 | HA GLN   | 25 | 0.174  | -1.035 | 5.580 | 1.00 | 0.00 |
| ATOM | 400 | CB GLN   | 25 | -0.135 | 1.090  | 5.851 | 1.00 | 0.00 |
| ATOM | 401 | HB2 GLN  | 25 | -0.353 | 1.953  | 5.221 | 1.00 | 0.00 |

|      |     |      |     |    |        |        |       |      |      |
|------|-----|------|-----|----|--------|--------|-------|------|------|
| ATOM | 402 | HB3  | GLN | 25 | -0.951 | 0.943  | 6.558 | 1.00 | 0.00 |
| ATOM | 403 | CG   | GLN | 25 | 1.168  | 1.335  | 6.619 | 1.00 | 0.00 |
| ATOM | 404 | HG2  | GLN | 25 | 1.570  | 0.365  | 6.911 | 1.00 | 0.00 |
| ATOM | 405 | HG3  | GLN | 25 | 1.886  | 1.848  | 5.978 | 1.00 | 0.00 |
| ATOM | 406 | CD   | GLN | 25 | 0.952  | 2.174  | 7.880 | 1.00 | 0.00 |
| ATOM | 407 | OE1  | GLN | 25 | 0.813  | 3.420  | 7.832 | 1.00 | 0.00 |
| ATOM | 408 | NE2  | GLN | 25 | 0.950  | 1.495  | 9.029 | 1.00 | 0.00 |
| ATOM | 409 | HE21 | GLN | 25 | 0.812  | 1.985  | 9.901 | 1.00 | 0.00 |
| ATOM | 410 | HE22 | GLN | 25 | 1.085  | 0.495  | 9.021 | 1.00 | 0.00 |
| ATOM | 411 | C    | GLN | 25 | -1.388 | -0.461 | 4.382 | 1.00 | 0.00 |
| ATOM | 412 | O    | GLN | 25 | -2.196 | -1.228 | 4.900 | 1.00 | 0.00 |
| ATOM | 413 | N    | ALA | 26 | -1.709 | 0.069  | 3.154 | 1.00 | 0.00 |
| ATOM | 414 | H    | ALA | 26 | -1.077 | 0.715  | 2.702 | 1.00 | 0.00 |
| ATOM | 415 | CA   | ALA | 26 | -2.910 | -0.258 | 2.497 | 1.00 | 0.00 |
| ATOM | 416 | HA   | ALA | 26 | -3.738 | -0.029 | 3.168 | 1.00 | 0.00 |
| ATOM | 417 | CB   | ALA | 26 | -3.043 | 0.593  | 1.260 | 1.00 | 0.00 |
| ATOM | 418 | HB1  | ALA | 26 | -2.226 | 0.369  | 0.574 | 1.00 | 0.00 |
| ATOM | 419 | HB2  | ALA | 26 | -3.995 | 0.380  | 0.772 | 1.00 | 0.00 |
| ATOM | 420 | HB3  | ALA | 26 | -3.005 | 1.647  | 1.537 | 1.00 | 0.00 |
| ATOM | 421 | C    | ALA | 26 | -3.022 | -1.762 | 2.043 | 1.00 | 0.00 |
| ATOM | 422 | O    | ALA | 26 | -4.150 | -2.244 | 2.070 | 1.00 | 0.00 |
| ATOM | 423 | N    | VAL | 27 | -1.923 | -2.258 | 1.595 | 1.00 | 0.00 |

|      |     |      |     |    |        |        |        |      |      |
|------|-----|------|-----|----|--------|--------|--------|------|------|
| ATOM | 424 | H    | VAL | 27 | -1.107 | -1.666 | 1.529  | 1.00 | 0.00 |
| ATOM | 425 | CA   | VAL | 27 | -1.803 | -3.720 | 1.135  | 1.00 | 0.00 |
| ATOM | 426 | HA   | VAL | 27 | -2.578 | -3.849 | 0.379  | 1.00 | 0.00 |
| ATOM | 427 | CB   | VAL | 27 | -0.497 | -4.126 | 0.551  | 1.00 | 0.00 |
| ATOM | 428 | HB   | VAL | 27 | 0.306  | -3.867 | 1.240  | 1.00 | 0.00 |
| ATOM | 429 | CG1  | VAL | 27 | -0.495 | -5.644 | 0.309  | 1.00 | 0.00 |
| ATOM | 430 | HG11 | VAL | 27 | -1.298 | -5.903 | -0.381 | 1.00 | 0.00 |
| ATOM | 431 | HG12 | VAL | 27 | 0.461  | -5.943 | -0.119 | 1.00 | 0.00 |
| ATOM | 432 | HG13 | VAL | 27 | -0.648 | -6.163 | 1.255  | 1.00 | 0.00 |
| ATOM | 433 | CG2  | VAL | 27 | -0.218 | -3.465 | -0.827 | 1.00 | 0.00 |
| ATOM | 434 | HG21 | VAL | 27 | -0.208 | -2.380 | -0.715 | 1.00 | 0.00 |
| ATOM | 435 | HG22 | VAL | 27 | 0.749  | -3.800 | -1.202 | 1.00 | 0.00 |
| ATOM | 436 | HG23 | VAL | 27 | -0.999 | -3.750 | -1.532 | 1.00 | 0.00 |
| ATOM | 437 | C    | VAL | 27 | -2.076 | -4.546 | 2.410  | 1.00 | 0.00 |
| ATOM | 438 | O    | VAL | 27 | -2.977 | -5.420 | 2.374  | 1.00 | 0.00 |
| ATOM | 439 | N    | GLN | 28 | -1.444 | -4.185 | 3.529  | 1.00 | 0.00 |
| ATOM | 440 | H    | GLN | 28 | -0.740 | -3.461 | 3.523  | 1.00 | 0.00 |
| ATOM | 441 | CA   | GLN | 28 | -1.680 | -4.922 | 4.787  | 1.00 | 0.00 |
| ATOM | 442 | HA   | GLN | 28 | -1.486 | -5.985 | 4.649  | 1.00 | 0.00 |
| ATOM | 443 | CB   | GLN | 28 | -0.753 | -4.399 | 5.838  | 1.00 | 0.00 |
| ATOM | 444 | HB2  | GLN | 28 | -0.876 | -3.316 | 5.876  | 1.00 | 0.00 |
| ATOM | 445 | HB3  | GLN | 28 | -1.058 | -4.832 | 6.791  | 1.00 | 0.00 |

|      |     |      |     |    |        |        |       |      |      |
|------|-----|------|-----|----|--------|--------|-------|------|------|
| ATOM | 446 | CG   | GLN | 28 | 0.641  | -4.720 | 5.584 | 1.00 | 0.00 |
| ATOM | 447 | HG2  | GLN | 28 | 0.805  | -5.772 | 5.816 | 1.00 | 0.00 |
| ATOM | 448 | HG3  | GLN | 28 | 0.892  | -4.535 | 4.539 | 1.00 | 0.00 |
| ATOM | 449 | CD   | GLN | 28 | 1.563  | -3.875 | 6.465 | 1.00 | 0.00 |
| ATOM | 450 | OE1  | GLN | 28 | 1.098  | -3.093 | 7.278 | 1.00 | 0.00 |
| ATOM | 451 | NE2  | GLN | 28 | 2.858  | -4.021 | 6.282 | 1.00 | 0.00 |
| ATOM | 452 | HE21 | GLN | 28 | 3.507  | -3.485 | 6.839 | 1.00 | 0.00 |
| ATOM | 453 | HE22 | GLN | 28 | 3.196  | -4.668 | 5.584 | 1.00 | 0.00 |
| ATOM | 454 | C    | GLN | 28 | -3.105 | -4.843 | 5.168 | 1.00 | 0.00 |
| ATOM | 455 | O    | GLN | 28 | -3.749 | -5.823 | 5.615 | 1.00 | 0.00 |
| ATOM | 456 | N    | SER | 29 | -3.703 | -3.635 | 5.165 | 1.00 | 0.00 |
| ATOM | 457 | H    | SER | 29 | -3.170 | -2.801 | 4.964 | 1.00 | 0.00 |
| ATOM | 458 | CA   | SER | 29 | -5.085 | -3.491 | 5.497 | 1.00 | 0.00 |
| ATOM | 459 | HA   | SER | 29 | -5.294 | -3.922 | 6.476 | 1.00 | 0.00 |
| ATOM | 460 | CB   | SER | 29 | -5.420 | -2.012 | 5.537 | 1.00 | 0.00 |
| ATOM | 461 | HB2  | SER | 29 | -5.214 | -1.551 | 4.571 | 1.00 | 0.00 |
| ATOM | 462 | HB3  | SER | 29 | -6.471 | -1.868 | 5.791 | 1.00 | 0.00 |
| ATOM | 463 | OG   | SER | 29 | -4.619 | -1.419 | 6.516 | 1.00 | 0.00 |
| ATOM | 464 | HG   | SER | 29 | -4.812 | -0.479 | 6.561 | 1.00 | 0.00 |
| ATOM | 465 | C    | SER | 29 | -6.095 | -4.160 | 4.612 | 1.00 | 0.00 |
| ATOM | 466 | O    | SER | 29 | -7.185 | -4.606 | 5.045 | 1.00 | 0.00 |
| ATOM | 467 | N    | ALA | 30 | -5.786 | -4.180 | 3.307 | 1.00 | 0.00 |

|      |     |     |     |    |        |         |       |      |      |
|------|-----|-----|-----|----|--------|---------|-------|------|------|
| ATOM | 468 | H   | ALA | 30 | -5.000 | -3.657  | 2.949 | 1.00 | 0.00 |
| ATOM | 469 | CA  | ALA | 30 | -6.624 | -4.869  | 2.373 | 1.00 | 0.00 |
| ATOM | 470 | HA  | ALA | 30 | -7.634 | -4.477  | 2.496 | 1.00 | 0.00 |
| ATOM | 471 | CB  | ALA | 30 | -6.169 | -4.597  | 0.956 | 1.00 | 0.00 |
| ATOM | 472 | HB1 | ALA | 30 | -5.163 | -4.992  | 0.815 | 1.00 | 0.00 |
| ATOM | 473 | HB2 | ALA | 30 | -6.851 | -5.080  | 0.256 | 1.00 | 0.00 |
| ATOM | 474 | HB3 | ALA | 30 | -6.166 | -3.522  | 0.775 | 1.00 | 0.00 |
| ATOM | 475 | C   | ALA | 30 | -6.687 | -6.373  | 2.648 | 1.00 | 0.00 |
| ATOM | 476 | O   | ALA | 30 | -7.684 | -6.972  | 2.430 | 1.00 | 0.00 |
| ATOM | 477 | N   | GLN | 31 | -5.629 | -6.911  | 3.141 | 1.00 | 0.00 |
| ATOM | 478 | H   | GLN | 31 | -4.787 | -6.369  | 3.271 | 1.00 | 0.00 |
| ATOM | 479 | CA  | GLN | 31 | -5.614 | -8.368  | 3.542 | 1.00 | 0.00 |
| ATOM | 480 | HA  | GLN | 31 | -5.858 | -8.995  | 2.684 | 1.00 | 0.00 |
| ATOM | 481 | CB  | GLN | 31 | -4.282 | -8.737  | 4.029 | 1.00 | 0.00 |
| ATOM | 482 | HB2 | GLN | 31 | -4.018 | -8.074  | 4.853 | 1.00 | 0.00 |
| ATOM | 483 | HB3 | GLN | 31 | -4.316 | -9.766  | 4.387 | 1.00 | 0.00 |
| ATOM | 484 | CG  | GLN | 31 | -3.271 | -8.621  | 2.961 | 1.00 | 0.00 |
| ATOM | 485 | HG2 | GLN | 31 | -3.600 | -9.270  | 2.149 | 1.00 | 0.00 |
| ATOM | 486 | HG3 | GLN | 31 | -3.237 | -7.589  | 2.609 | 1.00 | 0.00 |
| ATOM | 487 | CD  | GLN | 31 | -1.903 | -9.029  | 3.370 | 1.00 | 0.00 |
| ATOM | 488 | OE1 | GLN | 31 | -0.945 | -8.288  | 3.270 | 1.00 | 0.00 |
| ATOM | 489 | NE2 | GLN | 31 | -1.804 | -10.259 | 3.813 | 1.00 | 0.00 |



|      |     |      |     |    |         |         |        |      |      |
|------|-----|------|-----|----|---------|---------|--------|------|------|
| ATOM | 490 | HE21 | GLN | 31 | -0.907  | -10.614 | 4.111  | 1.00 | 0.00 |
| ATOM | 491 | HE22 | GLN | 31 | -2.626  | -10.845 | 3.854  | 1.00 | 0.00 |
| ATOM | 492 | C    | GLN | 31 | -6.603  | -8.682  | 4.640  | 1.00 | 0.00 |
| ATOM | 493 | O    | GLN | 31 | -7.135  | -9.764  | 4.672  | 1.00 | 0.00 |
| ATOM | 494 | N    | GLN | 32 | -6.892  | -7.735  | 5.515  | 1.00 | 0.00 |
| ATOM | 495 | H    | GLN | 32 | -6.413  | -6.846  | 5.481  | 1.00 | 0.00 |
| ATOM | 496 | CA   | GLN | 32 | -7.874  | -7.944  | 6.553  | 1.00 | 0.00 |
| ATOM | 497 | HA   | GLN | 32 | -7.666  | -8.875  | 7.080  | 1.00 | 0.00 |
| ATOM | 498 | CB   | GLN | 32 | -7.830  | -6.788  | 7.562  | 1.00 | 0.00 |
| ATOM | 499 | HB2  | GLN | 32 | -7.963  | -5.853  | 7.017  | 1.00 | 0.00 |
| ATOM | 500 | HB3  | GLN | 32 | -8.652  | -6.917  | 8.266  | 1.00 | 0.00 |
| ATOM | 501 | CG   | GLN | 32 | -6.525  | -6.749  | 8.315  | 1.00 | 0.00 |
| ATOM | 502 | HG2  | GLN | 32 | -5.999  | -7.700  | 8.241  | 1.00 | 0.00 |
| ATOM | 503 | HG3  | GLN | 32 | -5.904  | -5.957  | 7.896  | 1.00 | 0.00 |
| ATOM | 504 | CD   | GLN | 32 | -6.773  | -6.448  | 9.767  | 1.00 | 0.00 |
| ATOM | 505 | OE1  | GLN | 32 | -7.120  | -5.323  | 10.130 | 1.00 | 0.00 |
| ATOM | 506 | NE2  | GLN | 32 | -6.628  | -7.459  | 10.602 | 1.00 | 0.00 |
| ATOM | 507 | HE21 | GLN | 32 | -6.781  | -7.319  | 11.590 | 1.00 | 0.00 |
| ATOM | 508 | HE22 | GLN | 32 | -6.365  | -8.368  | 10.249 | 1.00 | 0.00 |
| ATOM | 509 | C    | GLN | 32 | -9.284  | -8.057  | 6.077  | 1.00 | 0.00 |
| ATOM | 510 | O    | GLN | 32 | -10.116 | -8.718  | 6.722  | 1.00 | 0.00 |
| ATOM | 511 | N    | GLN | 33 | -9.573  | -7.427  | 4.951  | 1.00 | 0.00 |

|      |     |      |     |    |         |         |       |      |      |
|------|-----|------|-----|----|---------|---------|-------|------|------|
| ATOM | 512 | H    | GLN | 33 | -8.885  | -6.827  | 4.519 | 1.00 | 0.00 |
| ATOM | 513 | CA   | GLN | 33 | -10.879 | -7.519  | 4.342 | 1.00 | 0.00 |
| ATOM | 514 | HA   | GLN | 33 | -11.659 | -7.502  | 5.103 | 1.00 | 0.00 |
| ATOM | 515 | CB   | GLN | 33 | -11.079 | -6.316  | 3.408 | 1.00 | 0.00 |
| ATOM | 516 | HB2  | GLN | 33 | -10.484 | -6.501  | 2.513 | 1.00 | 0.00 |
| ATOM | 517 | HB3  | GLN | 33 | -12.136 | -6.288  | 3.141 | 1.00 | 0.00 |
| ATOM | 518 | CG   | GLN | 33 | -10.669 | -4.962  | 4.028 | 1.00 | 0.00 |
| ATOM | 519 | HG2  | GLN | 33 | -11.072 | -4.876  | 5.037 | 1.00 | 0.00 |
| ATOM | 520 | HG3  | GLN | 33 | -9.580  | -4.934  | 4.068 | 1.00 | 0.00 |
| ATOM | 521 | CD   | GLN | 33 | -11.153 | -3.784  | 3.213 | 1.00 | 0.00 |
| ATOM | 522 | OE1  | GLN | 33 | -10.436 | -3.249  | 2.347 | 1.00 | 0.00 |
| ATOM | 523 | NE2  | GLN | 33 | -12.398 | -3.386  | 3.463 | 1.00 | 0.00 |
| ATOM | 524 | HE21 | GLN | 33 | -12.787 | -2.604  | 2.955 | 1.00 | 0.00 |
| ATOM | 525 | HE22 | GLN | 33 | -12.949 | -3.867  | 4.159 | 1.00 | 0.00 |
| ATOM | 526 | C    | GLN | 33 | -11.032 | -8.856  | 3.586 | 1.00 | 0.00 |
| ATOM | 527 | O    | GLN | 33 | -12.048 | -9.088  | 2.973 | 1.00 | 0.00 |
| ATOM | 528 | N    | GLN | 34 | -9.992  | -9.684  | 3.552 | 1.00 | 0.00 |
| ATOM | 529 | H    | GLN | 34 | -9.135  | -9.415  | 4.013 | 1.00 | 0.00 |
| ATOM | 530 | CA   | GLN | 34 | -10.030 | -10.973 | 2.852 | 1.00 | 0.00 |
| ATOM | 531 | HA   | GLN | 34 | -11.011 | -11.140 | 2.406 | 1.00 | 0.00 |
| ATOM | 532 | CB   | GLN | 34 | -8.975  | -10.958 | 1.729 | 1.00 | 0.00 |
| ATOM | 533 | HB2  | GLN | 34 | -7.997  | -10.884 | 2.204 | 1.00 | 0.00 |

|      |     |      |     |    |         |         |        |      |      |
|------|-----|------|-----|----|---------|---------|--------|------|------|
| ATOM | 534 | HB3  | GLN | 34 | -9.051  | -11.908 | 1.200  | 1.00 | 0.00 |
| ATOM | 535 | CG   | GLN | 34 | -9.145  | -9.821  | 0.749  | 1.00 | 0.00 |
| ATOM | 536 | HG2  | GLN | 34 | -10.150 | -9.844  | 0.327  | 1.00 | 0.00 |
| ATOM | 537 | HG3  | GLN | 34 | -9.008  | -8.895  | 1.308  | 1.00 | 0.00 |
| ATOM | 538 | CD   | GLN | 34 | -8.146  | -9.854  | -0.382 | 1.00 | 0.00 |
| ATOM | 539 | OE1  | GLN | 34 | -8.262  | -10.638 | -1.323 | 1.00 | 0.00 |
| ATOM | 540 | NE2  | GLN | 34 | -7.179  | -8.973  | -0.309 | 1.00 | 0.00 |
| ATOM | 541 | HE21 | GLN | 34 | -6.476  | -8.939  | -1.033 | 1.00 | 0.00 |
| ATOM | 542 | HE22 | GLN | 34 | -7.142  | -8.332  | 0.470  | 1.00 | 0.00 |
| ATOM | 543 | C    | GLN | 34 | -9.764  | -12.206 | 3.690  | 1.00 | 0.00 |
| ATOM | 544 | O    | GLN | 34 | -10.184 | -13.303 | 3.303  | 1.00 | 0.00 |
| ATOM | 545 | N    | GLY | 35 | -8.997  | -12.091 | 4.770  | 1.00 | 0.00 |
| ATOM | 546 | H    | GLY | 35 | -8.744  | -11.188 | 5.145  | 1.00 | 0.00 |
| ATOM | 547 | CA   | GLY | 35 | -8.495  | -13.293 | 5.449  | 1.00 | 0.00 |
| ATOM | 548 | HA2  | GLY | 35 | -7.920  | -12.998 | 6.326  | 1.00 | 0.00 |
| ATOM | 549 | HA3  | GLY | 35 | -9.338  | -13.911 | 5.758  | 1.00 | 0.00 |
| ATOM | 550 | C    | GLY | 35 | -7.597  | -14.107 | 4.516  | 1.00 | 0.00 |
| ATOM | 551 | O    | GLY | 35 | -6.905  | -13.524 | 3.691  | 1.00 | 0.00 |
| ATOM | 552 | N    | GLN | 36 | -7.643  | -15.437 | 4.616  | 1.00 | 0.00 |
| ATOM | 553 | H    | GLN | 36 | -8.397  | -15.863 | 5.136  | 1.00 | 0.00 |
| ATOM | 554 | CA   | GLN | 36 | -6.566  | -16.307 | 4.105  | 1.00 | 0.00 |
| ATOM | 555 | HA   | GLN | 36 | -5.653  | -16.089 | 4.658  | 1.00 | 0.00 |

|      |     |      |     |    |        |         |       |      |      |
|------|-----|------|-----|----|--------|---------|-------|------|------|
| ATOM | 556 | CB   | GLN | 36 | -6.887 | -17.821 | 4.253 | 1.00 | 0.00 |
| ATOM | 557 | HB2  | GLN | 36 | -7.967 | -17.894 | 4.381 | 1.00 | 0.00 |
| ATOM | 558 | HB3  | GLN | 36 | -6.601 | -18.288 | 3.311 | 1.00 | 0.00 |
| ATOM | 559 | CG   | GLN | 36 | -6.186 | -18.537 | 5.412 | 1.00 | 0.00 |
| ATOM | 560 | HG2  | GLN | 36 | -6.452 | -18.050 | 6.350 | 1.00 | 0.00 |
| ATOM | 561 | HG3  | GLN | 36 | -6.530 | -19.571 | 5.429 | 1.00 | 0.00 |
| ATOM | 562 | CD   | GLN | 36 | -4.671 | -18.531 | 5.273 | 1.00 | 0.00 |
| ATOM | 563 | OE1  | GLN | 36 | -4.103 | -19.189 | 4.393 | 1.00 | 0.00 |
| ATOM | 564 | NE2  | GLN | 36 | -4.010 | -17.770 | 6.137 | 1.00 | 0.00 |
| ATOM | 565 | HE21 | GLN | 36 | -3.002 | -17.723 | 6.096 | 1.00 | 0.00 |
| ATOM | 566 | HE22 | GLN | 36 | -4.519 | -17.241 | 6.831 | 1.00 | 0.00 |
| ATOM | 567 | C    | GLN | 36 | -6.186 | -15.982 | 2.666 | 1.00 | 0.00 |
| ATOM | 568 | O    | GLN | 36 | -6.898 | -16.291 | 1.717 | 1.00 | 0.00 |
| ATOM | 569 | N    | VAL | 37 | -5.045 | -15.326 | 2.536 | 1.00 | 0.00 |
| ATOM | 570 | H    | VAL | 37 | -4.577 | -14.999 | 3.368 | 1.00 | 0.00 |
| ATOM | 571 | CA   | VAL | 37 | -4.489 | -14.970 | 1.254 | 1.00 | 0.00 |
| ATOM | 572 | HA   | VAL | 37 | -5.000 | -15.447 | 0.417 | 1.00 | 0.00 |
| ATOM | 573 | CB   | VAL | 37 | -4.499 | -13.411 | 1.027 | 1.00 | 0.00 |
| ATOM | 574 | HB   | VAL | 37 | -5.528 | -13.111 | 0.828 | 1.00 | 0.00 |
| ATOM | 575 | CG1  | VAL | 37 | -3.965 | -12.631 | 2.223 | 1.00 | 0.00 |
| ATOM | 576 | HG11 | VAL | 37 | -2.936 | -12.929 | 2.422 | 1.00 | 0.00 |
| ATOM | 577 | HG12 | VAL | 37 | -3.998 | -11.563 | 2.005 | 1.00 | 0.00 |

|      |     |          |    |        |         |        |      |      |
|------|-----|----------|----|--------|---------|--------|------|------|
| ATOM | 578 | HG13 VAL | 37 | -4.580 | -12.841 | 3.098  | 1.00 | 0.00 |
| ATOM | 579 | CG2 VAL  | 37 | -3.754 | -13.022 | -0.220 | 1.00 | 0.00 |
| ATOM | 580 | HG21 VAL | 37 | -4.219 | -13.495 | -1.085 | 1.00 | 0.00 |
| ATOM | 581 | HG22 VAL | 37 | -3.785 | -11.939 | -0.340 | 1.00 | 0.00 |
| ATOM | 582 | HG23 VAL | 37 | -2.717 | -13.349 | -0.142 | 1.00 | 0.00 |
| ATOM | 583 | C VAL    | 37 | -3.090 | -15.617 | 1.252  | 1.00 | 0.00 |
| ATOM | 584 | O VAL    | 37 | -2.251 | -15.386 | 2.142  | 1.00 | 0.00 |
| ATOM | 585 | N GLY    | 38 | -2.871 | -16.438 | 0.256  | 1.00 | 0.00 |
| ATOM | 586 | H GLY    | 38 | -3.608 | -16.712 | -0.379 | 1.00 | 0.00 |
| ATOM | 587 | CA GLY   | 38 | -1.531 | -16.983 | 0.040  | 1.00 | 0.00 |
| ATOM | 588 | HA2 GLY  | 38 | -1.292 | -17.545 | 0.943  | 1.00 | 0.00 |
| ATOM | 589 | HA3 GLY  | 38 | -1.624 | -17.670 | -0.801 | 1.00 | 0.00 |
| ATOM | 590 | C GLY    | 38 | -0.409 | -16.003 | -0.244 | 1.00 | 0.00 |
| ATOM | 591 | O GLY    | 38 | -0.651 | -14.859 | -0.624 | 1.00 | 0.00 |
| ATOM | 592 | N PRO    | 39 | 0.834  | -16.437 | -0.081 | 1.00 | 0.00 |
| ATOM | 593 | CD PRO   | 39 | 1.250  | -17.787 | 0.399  | 1.00 | 0.00 |
| ATOM | 594 | HD2 PRO  | 39 | 0.728  | -18.555 | -0.172 | 1.00 | 0.00 |
| ATOM | 595 | HD3 PRO  | 39 | 1.005  | -17.891 | 1.456  | 1.00 | 0.00 |
| ATOM | 596 | CG PRO   | 39 | 2.702  | -17.791 | 0.156  | 1.00 | 0.00 |
| ATOM | 597 | HG2 PRO  | 39 | 2.894  | -18.261 | -0.809 | 1.00 | 0.00 |
| ATOM | 598 | HG3 PRO  | 39 | 3.187  | -18.367 | 0.943  | 1.00 | 0.00 |
| ATOM | 599 | CB PRO   | 39 | 3.162  | -16.381 | 0.172  | 1.00 | 0.00 |

|      |     |          |    |       |         |        |      |      |
|------|-----|----------|----|-------|---------|--------|------|------|
| ATOM | 600 | HB2 PRO  | 39 | 4.031 | -16.196 | -0.460 | 1.00 | 0.00 |
| ATOM | 601 | HB3 PRO  | 39 | 3.387 | -16.080 | 1.195  | 1.00 | 0.00 |
| ATOM | 602 | CA PRO   | 39 | 1.980 | -15.603 | -0.344 | 1.00 | 0.00 |
| ATOM | 603 | HA PRO   | 39 | 1.890 | -14.721 | 0.290  | 1.00 | 0.00 |
| ATOM | 604 | C PRO    | 39 | 2.106 | -15.176 | -1.777 | 1.00 | 0.00 |
| ATOM | 605 | O PRO    | 39 | 2.644 | -14.026 | -2.022 | 1.00 | 0.00 |
| ATOM | 606 | N GLN    | 40 | 1.599 | -15.931 | -2.764 | 1.00 | 0.00 |
| ATOM | 607 | H GLN    | 40 | 1.176 | -16.831 | -2.588 | 1.00 | 0.00 |
| ATOM | 608 | CA GLN   | 40 | 1.728 | -15.504 | -4.099 | 1.00 | 0.00 |
| ATOM | 609 | HA GLN   | 40 | 2.733 | -15.117 | -4.269 | 1.00 | 0.00 |
| ATOM | 610 | CB GLN   | 40 | 1.488 | -16.654 | -5.044 | 1.00 | 0.00 |
| ATOM | 611 | HB2 GLN  | 40 | 0.513 | -17.092 | -4.831 | 1.00 | 0.00 |
| ATOM | 612 | HB3 GLN  | 40 | 1.501 | -16.281 | -6.068 | 1.00 | 0.00 |
| ATOM | 613 | CG GLN   | 40 | 2.566 | -17.712 | -4.876 | 1.00 | 0.00 |
| ATOM | 614 | HG2 GLN  | 40 | 3.547 | -17.354 | -5.188 | 1.00 | 0.00 |
| ATOM | 615 | HG3 GLN  | 40 | 2.575 | -17.906 | -3.804 | 1.00 | 0.00 |
| ATOM | 616 | CD GLN   | 40 | 2.266 | -19.031 | -5.613 | 1.00 | 0.00 |
| ATOM | 617 | OE1 GLN  | 40 | 1.731 | -19.998 | -5.051 | 1.00 | 0.00 |
| ATOM | 618 | NE2 GLN  | 40 | 2.505 | -19.019 | -6.843 | 1.00 | 0.00 |
| ATOM | 619 | HE21 GLN | 40 | 2.334 | -19.847 | -7.396 | 1.00 | 0.00 |
| ATOM | 620 | HE22 GLN | 40 | 2.867 | -18.181 | -7.276 | 1.00 | 0.00 |
| ATOM | 621 | C GLN    | 40 | 0.750 | -14.329 | -4.320 | 1.00 | 0.00 |

|      |     |      |     |    |        |         |        |      |      |
|------|-----|------|-----|----|--------|---------|--------|------|------|
| ATOM | 622 | O    | GLN | 40 | 1.072  | -13.326 | -4.975 | 1.00 | 0.00 |
| ATOM | 623 | N    | GLN | 41 | -0.477 | -14.495 | -3.832 | 1.00 | 0.00 |
| ATOM | 624 | H    | GLN | 41 | -0.768 | -15.382 | -3.446 | 1.00 | 0.00 |
| ATOM | 625 | CA   | GLN | 41 | -1.466 | -13.408 | -3.905 | 1.00 | 0.00 |
| ATOM | 626 | HA   | GLN | 41 | -1.566 | -13.085 | -4.942 | 1.00 | 0.00 |
| ATOM | 627 | CB   | GLN | 41 | -2.824 | -13.846 | -3.403 | 1.00 | 0.00 |
| ATOM | 628 | HB2  | GLN | 41 | -3.087 | -14.808 | -3.842 | 1.00 | 0.00 |
| ATOM | 629 | HB3  | GLN | 41 | -2.805 | -13.935 | -2.317 | 1.00 | 0.00 |
| ATOM | 630 | CG   | GLN | 41 | -3.860 | -12.803 | -3.809 | 1.00 | 0.00 |
| ATOM | 631 | HG2  | GLN | 41 | -3.653 | -11.910 | -3.219 | 1.00 | 0.00 |
| ATOM | 632 | HG3  | GLN | 41 | -3.714 | -12.581 | -4.866 | 1.00 | 0.00 |
| ATOM | 633 | CD   | GLN | 41 | -5.294 | -13.197 | -3.595 | 1.00 | 0.00 |
| ATOM | 634 | OE1  | GLN | 41 | -5.644 | -14.382 | -3.486 | 1.00 | 0.00 |
| ATOM | 635 | NE2  | GLN | 41 | -6.146 | -12.197 | -3.548 | 1.00 | 0.00 |
| ATOM | 636 | HE21 | GLN | 41 | -7.129 | -12.381 | -3.407 | 1.00 | 0.00 |
| ATOM | 637 | HE22 | GLN | 41 | -5.814 | -11.249 | -3.653 | 1.00 | 0.00 |
| ATOM | 638 | C    | GLN | 41 | -1.040 | -12.166 | -3.138 | 1.00 | 0.00 |
| ATOM | 639 | O    | GLN | 41 | -1.195 | -11.039 | -3.640 | 1.00 | 0.00 |
| ATOM | 640 | N    | VAL | 42 | -0.433 | -12.368 | -2.001 | 1.00 | 0.00 |
| ATOM | 641 | H    | VAL | 42 | -0.311 | -13.281 | -1.587 | 1.00 | 0.00 |
| ATOM | 642 | CA   | VAL | 42 | 0.108  | -11.176 | -1.267 | 1.00 | 0.00 |
| ATOM | 643 | HA   | VAL | 42 | -0.652 | -10.422 | -1.058 | 1.00 | 0.00 |

|      |     |      |     |    |        |         |        |      |      |
|------|-----|------|-----|----|--------|---------|--------|------|------|
| ATOM | 644 | CB   | VAL | 42 | 0.772  | -11.582 | 0.053  | 1.00 | 0.00 |
| ATOM | 645 | HB   | VAL | 42 | 1.434  | -12.424 | -0.148 | 1.00 | 0.00 |
| ATOM | 646 | CG1  | VAL | 42 | 1.579  | -10.435 | 0.678  | 1.00 | 0.00 |
| ATOM | 647 | HG11 | VAL | 42 | 0.917  | -9.592  | 0.879  | 1.00 | 0.00 |
| ATOM | 648 | HG12 | VAL | 42 | 2.029  | -10.773 | 1.611  | 1.00 | 0.00 |
| ATOM | 649 | HG13 | VAL | 42 | 2.363  | -10.124 | -0.012 | 1.00 | 0.00 |
| ATOM | 650 | CG2  | VAL | 42 | -0.307 | -12.100 | 0.965  | 1.00 | 0.00 |
| ATOM | 651 | HG21 | VAL | 42 | -0.792 | -12.960 | 0.503  | 1.00 | 0.00 |
| ATOM | 652 | HG22 | VAL | 42 | 0.133  | -12.398 | 1.916  | 1.00 | 0.00 |
| ATOM | 653 | HG23 | VAL | 42 | -1.046 | -11.316 | 1.136  | 1.00 | 0.00 |
| ATOM | 654 | C    | VAL | 42 | 1.143  | -10.472 | -2.138 | 1.00 | 0.00 |
| ATOM | 655 | O    | VAL | 42 | 1.159  | -9.215  | -2.234 | 1.00 | 0.00 |
| ATOM | 656 | N    | GLY | 43 | 2.098  | -11.184 | -2.727 | 1.00 | 0.00 |
| ATOM | 657 | H    | GLY | 43 | 2.170  | -12.180 | -2.580 | 1.00 | 0.00 |
| ATOM | 658 | CA   | GLY | 43 | 3.034  | -10.566 | -3.573 | 1.00 | 0.00 |
| ATOM | 659 | HA2  | GLY | 43 | 3.595  | -9.842  | -2.983 | 1.00 | 0.00 |
| ATOM | 660 | HA3  | GLY | 43 | 3.711  | -11.334 | -3.945 | 1.00 | 0.00 |
| ATOM | 661 | C    | GLY | 43 | 2.411  | -9.867  | -4.733 | 1.00 | 0.00 |
| ATOM | 662 | O    | GLY | 43 | 2.802  | -8.738  | -5.008 | 1.00 | 0.00 |
| ATOM | 663 | N    | HIE | 44 | 1.428  | -10.415 | -5.368 | 1.00 | 0.00 |
| ATOM | 664 | H    | HIE | 44 | 1.252  | -11.400 | -5.232 | 1.00 | 0.00 |
| ATOM | 665 | CA   | HIE | 44 | 0.663  | -9.712  | -6.386 | 1.00 | 0.00 |



|      |     |     |     |    |        |         |         |      |      |
|------|-----|-----|-----|----|--------|---------|---------|------|------|
| ATOM | 666 | HA  | HIE | 44 | 1.326  | -9.330  | -7.162  | 1.00 | 0.00 |
| ATOM | 667 | CB  | HIE | 44 | -0.342 | -10.681 | -7.032  | 1.00 | 0.00 |
| ATOM | 668 | HB2 | HIE | 44 | 0.068  | -11.579 | -7.495  | 1.00 | 0.00 |
| ATOM | 669 | HB3 | HIE | 44 | -0.988 | -10.963 | -6.200  | 1.00 | 0.00 |
| ATOM | 670 | CG  | HIE | 44 | -1.220 | -10.037 | -8.054  | 1.00 | 0.00 |
| ATOM | 671 | ND1 | HIE | 44 | -0.733 | -9.640  | -9.279  | 1.00 | 0.00 |
| ATOM | 672 | CE1 | HIE | 44 | -1.707 | -9.093  | -9.984  | 1.00 | 0.00 |
| ATOM | 673 | HE1 | HIE | 44 | -1.544 | -8.765  | -11.011 | 1.00 | 0.00 |
| ATOM | 674 | NE2 | HIE | 44 | -2.787 | -9.052  | -9.222  | 1.00 | 0.00 |
| ATOM | 675 | HE2 | HIE | 44 | -3.689 | -8.687  | -9.494  | 1.00 | 0.00 |
| ATOM | 676 | CD2 | HIE | 44 | -2.492 | -9.587  | -7.993  | 1.00 | 0.00 |
| ATOM | 677 | HD2 | HIE | 44 | -3.243 | -9.583  | -7.203  | 1.00 | 0.00 |
| ATOM | 678 | C   | HIE | 44 | 0.008  | -8.420  | -5.882  | 1.00 | 0.00 |
| ATOM | 679 | O   | HIE | 44 | -0.002 | -7.439  | -6.604  | 1.00 | 0.00 |
| ATOM | 680 | N   | MET | 45 | -0.544 | -8.426  | -4.699  | 1.00 | 0.00 |
| ATOM | 681 | H   | MET | 45 | -0.652 | -9.272  | -4.159  | 1.00 | 0.00 |
| ATOM | 682 | CA  | MET | 45 | -1.150 | -7.185  | -4.182  | 1.00 | 0.00 |
| ATOM | 683 | HA  | MET | 45 | -1.855 | -6.784  | -4.911  | 1.00 | 0.00 |
| ATOM | 684 | CB  | MET | 45 | -1.894 | -7.462  | -2.889  | 1.00 | 0.00 |
| ATOM | 685 | HB2 | MET | 45 | -1.193 | -7.924  | -2.195  | 1.00 | 0.00 |
| ATOM | 686 | HB3 | MET | 45 | -2.227 | -6.505  | -2.486  | 1.00 | 0.00 |
| ATOM | 687 | CG  | MET | 45 | -3.098 | -8.379  | -3.082  | 1.00 | 0.00 |

|      |     |         |    |        |        |        |      |      |
|------|-----|---------|----|--------|--------|--------|------|------|
| ATOM | 688 | HG2 MET | 45 | -3.867 | -7.785 | -3.578 | 1.00 | 0.00 |
| ATOM | 689 | HG3 MET | 45 | -2.777 | -9.182 | -3.745 | 1.00 | 0.00 |
| ATOM | 690 | SD MET  | 45 | -3.775 | -9.087 | -1.586 | 1.00 | 0.00 |
| ATOM | 691 | CE MET  | 45 | -3.977 | -7.507 | -0.711 | 1.00 | 0.00 |
| ATOM | 692 | HE1 MET | 45 | -4.649 | -6.861 | -1.277 | 1.00 | 0.00 |
| ATOM | 693 | HE2 MET | 45 | -4.397 | -7.690 | 0.278  | 1.00 | 0.00 |
| ATOM | 694 | HE3 MET | 45 | -3.007 | -7.021 | -0.609 | 1.00 | 0.00 |
| ATOM | 695 | C MET   | 45 | -0.110 | -6.093 | -4.040 | 1.00 | 0.00 |
| ATOM | 696 | O MET   | 45 | -0.375 | -4.925 | -4.300 | 1.00 | 0.00 |
| ATOM | 697 | N TYR   | 46 | 1.083  | -6.418 | -3.586 | 1.00 | 0.00 |
| ATOM | 698 | H TYR   | 46 | 1.263  | -7.324 | -3.179 | 1.00 | 0.00 |
| ATOM | 699 | CA TYR  | 46 | 2.139  | -5.439 | -3.567 | 1.00 | 0.00 |
| ATOM | 700 | HA TYR  | 46 | 1.779  | -4.531 | -3.082 | 1.00 | 0.00 |
| ATOM | 701 | CB TYR  | 46 | 3.366  | -5.949 | -2.805 | 1.00 | 0.00 |
| ATOM | 702 | HB2 TYR | 46 | 3.545  | -6.976 | -3.121 | 1.00 | 0.00 |
| ATOM | 703 | HB3 TYR | 46 | 4.206  | -5.324 | -3.108 | 1.00 | 0.00 |
| ATOM | 704 | CG TYR  | 46 | 3.222  | -5.903 | -1.322 | 1.00 | 0.00 |
| ATOM | 705 | CD1 TYR | 46 | 3.433  | -4.740 | -0.600 | 1.00 | 0.00 |
| ATOM | 706 | HD1 TYR | 46 | 3.826  | -3.854 | -1.099 | 1.00 | 0.00 |
| ATOM | 707 | CE1 TYR | 46 | 3.142  | -4.701 | 0.769  | 1.00 | 0.00 |
| ATOM | 708 | HE1 TYR | 46 | 3.284  | -3.757 | 1.296  | 1.00 | 0.00 |
| ATOM | 709 | CZ TYR  | 46 | 2.930  | -5.811 | 1.449  | 1.00 | 0.00 |

|      |     |     |     |    |       |        |         |      |      |
|------|-----|-----|-----|----|-------|--------|---------|------|------|
| ATOM | 710 | OH  | TYR | 46 | 2.668 | -5.812 | 2.849   | 1.00 | 0.00 |
| ATOM | 711 | HH  | TYR | 46 | 2.664 | -4.931 | 3.230   | 1.00 | 0.00 |
| ATOM | 712 | CE2 | TYR | 46 | 2.716 | -6.988 | 0.761   | 1.00 | 0.00 |
| ATOM | 713 | HE2 | TYR | 46 | 2.432 | -7.893 | 1.297   | 1.00 | 0.00 |
| ATOM | 714 | CD2 | TYR | 46 | 2.860 | -7.015 | -0.586  | 1.00 | 0.00 |
| ATOM | 715 | HD2 | TYR | 46 | 2.688 | -7.941 | -1.134  | 1.00 | 0.00 |
| ATOM | 716 | C   | TYR | 46 | 2.557 | -4.961 | -4.941  | 1.00 | 0.00 |
| ATOM | 717 | O   | TYR | 46 | 2.897 | -3.768 | -5.174  | 1.00 | 0.00 |
| ATOM | 718 | N   | ARG | 47 | 2.578 | -5.857 | -5.918  | 1.00 | 0.00 |
| ATOM | 719 | H   | ARG | 47 | 2.547 | -6.840 | -5.690  | 1.00 | 0.00 |
| ATOM | 720 | CA  | ARG | 47 | 2.807 | -5.480 | -7.296  | 1.00 | 0.00 |
| ATOM | 721 | HA  | ARG | 47 | 3.730 | -4.906 | -7.374  | 1.00 | 0.00 |
| ATOM | 722 | CB  | ARG | 47 | 2.929 | -6.726 | -8.180  | 1.00 | 0.00 |
| ATOM | 723 | HB2 | ARG | 47 | 3.662 | -7.394 | -7.728  | 1.00 | 0.00 |
| ATOM | 724 | HB3 | ARG | 47 | 1.957 | -7.219 | -8.209  | 1.00 | 0.00 |
| ATOM | 725 | CG  | ARG | 47 | 3.367 | -6.379 | -9.606  | 1.00 | 0.00 |
| ATOM | 726 | HG2 | ARG | 47 | 2.766 | -5.550 | -9.981  | 1.00 | 0.00 |
| ATOM | 727 | HG3 | ARG | 47 | 4.418 | -6.093 | -9.605  | 1.00 | 0.00 |
| ATOM | 728 | CD  | ARG | 47 | 3.171 | -7.602 | -10.510 | 1.00 | 0.00 |
| ATOM | 729 | HD2 | ARG | 47 | 3.951 | -8.304 | -10.216 | 1.00 | 0.00 |
| ATOM | 730 | HD3 | ARG | 47 | 2.196 | -8.007 | -10.238 | 1.00 | 0.00 |
| ATOM | 731 | NE  | ARG | 47 | 3.219 | -7.427 | -11.990 | 1.00 | 0.00 |

|      |     |      |     |    |        |        |         |      |      |
|------|-----|------|-----|----|--------|--------|---------|------|------|
| ATOM | 732 | HE   | ARG | 47 | 2.330  | -7.269 | -12.444 | 1.00 | 0.00 |
| ATOM | 733 | CZ   | ARG | 47 | 4.326  | -7.472 | -12.747 | 1.00 | 0.00 |
| ATOM | 734 | NH1  | ARG | 47 | 5.545  | -7.631 | -12.216 | 1.00 | 0.00 |
| ATOM | 735 | HH11 | ARG | 47 | 5.648  | -7.721 | -11.216 | 1.00 | 0.00 |
| ATOM | 736 | HH12 | ARG | 47 | 6.355  | -7.660 | -12.819 | 1.00 | 0.00 |
| ATOM | 737 | NH2  | ARG | 47 | 4.219  | -7.346 | -14.066 | 1.00 | 0.00 |
| ATOM | 738 | HH21 | ARG | 47 | 3.309  | -7.218 | -14.486 | 1.00 | 0.00 |
| ATOM | 739 | HH22 | ARG | 47 | 5.048  | -7.379 | -14.642 | 1.00 | 0.00 |
| ATOM | 740 | C    | ARG | 47 | 1.802  | -4.496 | -7.821  | 1.00 | 0.00 |
| ATOM | 741 | O    | ARG | 47 | 2.169  | -3.498 | -8.464  | 1.00 | 0.00 |
| ATOM | 742 | N    | VAL | 48 | 0.542  | -4.741 | -7.573  | 1.00 | 0.00 |
| ATOM | 743 | H    | VAL | 48 | 0.297  | -5.563 | -7.041  | 1.00 | 0.00 |
| ATOM | 744 | CA   | VAL | 48 | -0.539 | -3.842 | -8.004  | 1.00 | 0.00 |
| ATOM | 745 | HA   | VAL | 48 | -0.515 | -3.757 | -9.091  | 1.00 | 0.00 |
| ATOM | 746 | CB   | VAL | 48 | -1.915 | -4.374 | -7.584  | 1.00 | 0.00 |
| ATOM | 747 | HB   | VAL | 48 | -1.869 | -4.635 | -6.527  | 1.00 | 0.00 |
| ATOM | 748 | CG1  | VAL | 48 | -3.004 | -3.366 | -7.803  | 1.00 | 0.00 |
| ATOM | 749 | HG11 | VAL | 48 | -3.051 | -3.105 | -8.860  | 1.00 | 0.00 |
| ATOM | 750 | HG12 | VAL | 48 | -3.959 | -3.788 | -7.491  | 1.00 | 0.00 |
| ATOM | 751 | HG13 | VAL | 48 | -2.795 | -2.471 | -7.217  | 1.00 | 0.00 |
| ATOM | 752 | CG2  | VAL | 48 | -2.173 | -5.594 | -8.448  | 1.00 | 0.00 |
| ATOM | 753 | HG21 | VAL | 48 | -1.394 | -6.335 | -8.272  | 1.00 | 0.00 |

|      |     |      |     |    |        |        |        |      |      |
|------|-----|------|-----|----|--------|--------|--------|------|------|
| ATOM | 754 | HG22 | VAL | 48 | -3.144 | -6.020 | -8.195 | 1.00 | 0.00 |
| ATOM | 755 | HG23 | VAL | 48 | -2.167 | -5.303 | -9.499 | 1.00 | 0.00 |
| ATOM | 756 | C    | VAL | 48 | -0.287 | -2.518 | -7.291 | 1.00 | 0.00 |
| ATOM | 757 | O    | VAL | 48 | -0.340 | -1.409 | -7.926 | 1.00 | 0.00 |
| ATOM | 758 | N    | ALA | 49 | -0.120 | -2.562 | -5.962 | 1.00 | 0.00 |
| ATOM | 759 | H    | ALA | 49 | -0.147 | -3.431 | -5.448 | 1.00 | 0.00 |
| ATOM | 760 | CA   | ALA | 49 | 0.054  | -1.322 | -5.215 | 1.00 | 0.00 |
| ATOM | 761 | HA   | ALA | 49 | -0.845 | -0.720 | -5.355 | 1.00 | 0.00 |
| ATOM | 762 | CB   | ALA | 49 | 0.248  | -1.576 | -3.704 | 1.00 | 0.00 |
| ATOM | 763 | HB1  | ALA | 49 | 1.149  | -2.169 | -3.548 | 1.00 | 0.00 |
| ATOM | 764 | HB2  | ALA | 49 | 0.346  | -0.623 | -3.185 | 1.00 | 0.00 |
| ATOM | 765 | HB3  | ALA | 49 | -0.615 | -2.115 | -3.312 | 1.00 | 0.00 |
| ATOM | 766 | C    | ALA | 49 | 1.218  | -0.541 | -5.734 | 1.00 | 0.00 |
| ATOM | 767 | O    | ALA | 49 | 1.163  | 0.746  | -5.764 | 1.00 | 0.00 |
| ATOM | 768 | N    | SER | 50 | 2.317  | -1.179 | -6.123 | 1.00 | 0.00 |
| ATOM | 769 | H    | SER | 50 | 2.372  | -2.149 | -5.847 | 1.00 | 0.00 |
| ATOM | 770 | CA   | SER | 50 | 3.488  | -0.563 | -6.696 | 1.00 | 0.00 |
| ATOM | 771 | HA   | SER | 50 | 3.837  | 0.234  | -6.040 | 1.00 | 0.00 |
| ATOM | 772 | CB   | SER | 50 | 4.638  | -1.598 | -6.877 | 1.00 | 0.00 |
| ATOM | 773 | HB2  | SER | 50 | 5.600  | -1.090 | -6.936 | 1.00 | 0.00 |
| ATOM | 774 | HB3  | SER | 50 | 4.649  | -2.302 | -6.046 | 1.00 | 0.00 |
| ATOM | 775 | OG   | SER | 50 | 4.401  | -2.292 | -8.075 | 1.00 | 0.00 |

|      |     |      |     |    |       |        |         |      |      |
|------|-----|------|-----|----|-------|--------|---------|------|------|
| ATOM | 776 | HG   | SER | 50 | 5.096 | -2.939 | -8.213  | 1.00 | 0.00 |
| ATOM | 777 | C    | SER | 50 | 3.250 | 0.292  | -7.949  | 1.00 | 0.00 |
| ATOM | 778 | O    | SER | 50 | 4.002 | 1.222  | -8.190  | 1.00 | 0.00 |
| ATOM | 779 | N    | ARG | 51 | 2.178 | 0.011  | -8.667  | 1.00 | 0.00 |
| ATOM | 780 | H    | ARG | 51 | 1.538 | -0.700 | -8.343  | 1.00 | 0.00 |
| ATOM | 781 | CA   | ARG | 51 | 1.892 | 0.663  | -9.891  | 1.00 | 0.00 |
| ATOM | 782 | HA   | ARG | 51 | 2.832 | 0.963  | -10.354 | 1.00 | 0.00 |
| ATOM | 783 | CB   | ARG | 51 | 1.140 | -0.208 | -10.854 | 1.00 | 0.00 |
| ATOM | 784 | HB2  | ARG | 51 | 0.271 | -0.605 | -10.329 | 1.00 | 0.00 |
| ATOM | 785 | HB3  | ARG | 51 | 0.808 | 0.423  | -11.679 | 1.00 | 0.00 |
| ATOM | 786 | CG   | ARG | 51 | 1.982 | -1.371 | -11.406 | 1.00 | 0.00 |
| ATOM | 787 | HG2  | ARG | 51 | 2.908 | -0.966 | -11.812 | 1.00 | 0.00 |
| ATOM | 788 | HG3  | ARG | 51 | 2.212 | -2.052 | -10.587 | 1.00 | 0.00 |
| ATOM | 789 | CD   | ARG | 51 | 1.245 | -2.117 | -12.486 | 1.00 | 0.00 |
| ATOM | 790 | HD2  | ARG | 51 | 0.273 | -2.426 | -12.101 | 1.00 | 0.00 |
| ATOM | 791 | HD3  | ARG | 51 | 1.102 | -1.453 | -13.339 | 1.00 | 0.00 |
| ATOM | 792 | NE   | ARG | 51 | 1.984 | -3.325 | -12.941 | 1.00 | 0.00 |
| ATOM | 793 | HE   | ARG | 51 | 1.892 | -4.196 | -12.438 | 1.00 | 0.00 |
| ATOM | 794 | CZ   | ARG | 51 | 2.807 | -3.278 | -13.981 | 1.00 | 0.00 |
| ATOM | 795 | NH1  | ARG | 51 | 2.959 | -2.201 | -14.656 | 1.00 | 0.00 |
| ATOM | 796 | HH11 | ARG | 51 | 2.446 | -1.370 | -14.398 | 1.00 | 0.00 |
| ATOM | 797 | HH12 | ARG | 51 | 3.590 | -2.187 | -15.444 | 1.00 | 0.00 |

|      |     |      |     |    |        |        |         |      |      |
|------|-----|------|-----|----|--------|--------|---------|------|------|
| ATOM | 798 | NH2  | ARG | 51 | 3.440  | -4.367 | -14.346 | 1.00 | 0.00 |
| ATOM | 799 | HH21 | ARG | 51 | 3.296  | -5.226 | -13.835 | 1.00 | 0.00 |
| ATOM | 800 | HH22 | ARG | 51 | 4.068  | -4.341 | -15.136 | 1.00 | 0.00 |
| ATOM | 801 | C    | ARG | 51 | 1.059  | 1.906  | -9.646  | 1.00 | 0.00 |
| ATOM | 802 | O    | ARG | 51 | 0.912  | 2.722  | -10.538 | 1.00 | 0.00 |
| ATOM | 803 | N    | ILE | 52 | 0.467  | 2.043  | -8.439  | 1.00 | 0.00 |
| ATOM | 804 | H    | ILE | 52 | 0.595  | 1.358  | -7.709  | 1.00 | 0.00 |
| ATOM | 805 | CA   | ILE | 52 | -0.519 | 3.065  | -8.246  | 1.00 | 0.00 |
| ATOM | 806 | HA   | ILE | 52 | -1.197 | 3.158  | -9.095  | 1.00 | 0.00 |
| ATOM | 807 | CB   | ILE | 52 | -1.335 | 2.792  | -6.963  | 1.00 | 0.00 |
| ATOM | 808 | HB   | ILE | 52 | -0.648 | 2.568  | -6.147  | 1.00 | 0.00 |
| ATOM | 809 | CG2  | ILE | 52 | -2.201 | 4.042  | -6.587  | 1.00 | 0.00 |
| ATOM | 810 | HG21 | ILE | 52 | -2.889 | 4.267  | -7.403  | 1.00 | 0.00 |
| ATOM | 811 | HG22 | ILE | 52 | -2.769 | 3.832  | -5.681  | 1.00 | 0.00 |
| ATOM | 812 | HG23 | ILE | 52 | -1.549 | 4.899  | -6.416  | 1.00 | 0.00 |
| ATOM | 813 | CG1  | ILE | 52 | -2.173 | 1.534  | -7.165  | 1.00 | 0.00 |
| ATOM | 814 | HG12 | ILE | 52 | -2.851 | 1.705  | -8.002  | 1.00 | 0.00 |
| ATOM | 815 | HG13 | ILE | 52 | -1.502 | 0.710  | -7.405  | 1.00 | 0.00 |
| ATOM | 816 | CD1  | ILE | 52 | -2.982 | 1.185  | -5.917  | 1.00 | 0.00 |
| ATOM | 817 | HD11 | ILE | 52 | -3.655 | 2.009  | -5.677  | 1.00 | 0.00 |
| ATOM | 818 | HD12 | ILE | 52 | -3.566 | 0.283  | -6.102  | 1.00 | 0.00 |
| ATOM | 819 | HD13 | ILE | 52 | -2.305 | 1.014  | -5.081  | 1.00 | 0.00 |

|      |     |     |     |    |        |       |         |      |      |
|------|-----|-----|-----|----|--------|-------|---------|------|------|
| ATOM | 820 | C   | ILE | 52 | 0.030  | 4.491 | -8.324  | 1.00 | 0.00 |
| ATOM | 821 | O   | ILE | 52 | -0.623 | 5.334 | -8.940  | 1.00 | 0.00 |
| ATOM | 822 | N   | PRO | 53 | 1.181  | 4.720 | -7.785  | 1.00 | 0.00 |
| ATOM | 823 | CD  | PRO | 53 | 2.065  | 3.948 | -6.867  | 1.00 | 0.00 |
| ATOM | 824 | HD2 | PRO | 53 | 2.695  | 3.289 | -7.464  | 1.00 | 0.00 |
| ATOM | 825 | HD3 | PRO | 53 | 1.440  | 3.350 | -6.204  | 1.00 | 0.00 |
| ATOM | 826 | CG  | PRO | 53 | 2.865  | 4.999 | -6.117  | 1.00 | 0.00 |
| ATOM | 827 | HG2 | PRO | 53 | 3.842  | 4.625 | -5.812  | 1.00 | 0.00 |
| ATOM | 828 | HG3 | PRO | 53 | 2.329  | 5.369 | -5.243  | 1.00 | 0.00 |
| ATOM | 829 | CB  | PRO | 53 | 2.989  | 6.059 | -7.151  | 1.00 | 0.00 |
| ATOM | 830 | HB2 | PRO | 53 | 3.789  | 5.754 | -7.825  | 1.00 | 0.00 |
| ATOM | 831 | HB3 | PRO | 53 | 3.220  | 7.039 | -6.734  | 1.00 | 0.00 |
| ATOM | 832 | CA  | PRO | 53 | 1.698  | 6.113 | -7.890  | 1.00 | 0.00 |
| ATOM | 833 | HA  | PRO | 53 | 0.968  | 6.787 | -7.440  | 1.00 | 0.00 |
| ATOM | 834 | C   | PRO | 53 | 1.934  | 6.518 | -9.346  | 1.00 | 0.00 |
| ATOM | 835 | O   | PRO | 53 | 1.471  | 7.597 | -9.724  | 1.00 | 0.00 |
| ATOM | 836 | N   | ALA | 54 | 2.484  | 5.673 | -10.234 | 1.00 | 0.00 |
| ATOM | 837 | H   | ALA | 54 | 3.026  | 4.859 | -9.984  | 1.00 | 0.00 |
| ATOM | 838 | CA  | ALA | 54 | 2.437  | 6.073 | -11.655 | 1.00 | 0.00 |
| ATOM | 839 | HA  | ALA | 54 | 2.924  | 7.047 | -11.600 | 1.00 | 0.00 |
| ATOM | 840 | CB  | ALA | 54 | 3.275  | 5.164 | -12.511 | 1.00 | 0.00 |
| ATOM | 841 | HB1 | ALA | 54 | 2.795  | 4.188 | -12.583 | 1.00 | 0.00 |



|      |     |      |     |    |        |       |         |      |      |
|------|-----|------|-----|----|--------|-------|---------|------|------|
| ATOM | 842 | HB2  | ALA | 54 | 3.375  | 5.594 | -13.508 | 1.00 | 0.00 |
| ATOM | 843 | HB3  | ALA | 54 | 4.262  | 5.051 | -12.064 | 1.00 | 0.00 |
| ATOM | 844 | C    | ALA | 54 | 1.131  | 6.256 | -12.286 | 1.00 | 0.00 |
| ATOM | 845 | O    | ALA | 54 | 0.949  | 7.167 | -13.095 | 1.00 | 0.00 |
| ATOM | 846 | N    | ILE | 55 | 0.149  | 5.429 | -12.000 | 1.00 | 0.00 |
| ATOM | 847 | H    | ILE | 55 | 0.370  | 4.619 | -11.440 | 1.00 | 0.00 |
| ATOM | 848 | CA   | ILE | 55 | -1.184 | 5.537 | -12.554 | 1.00 | 0.00 |
| ATOM | 849 | HA   | ILE | 55 | -1.192 | 5.629 | -13.640 | 1.00 | 0.00 |
| ATOM | 850 | CB   | ILE | 55 | -2.044 | 4.372 | -12.144 | 1.00 | 0.00 |
| ATOM | 851 | HB   | ILE | 55 | -1.887 | 4.203 | -11.079 | 1.00 | 0.00 |
| ATOM | 852 | CG2  | ILE | 55 | -3.530 | 4.604 | -12.408 | 1.00 | 0.00 |
| ATOM | 853 | HG21 | ILE | 55 | -3.689 | 4.773 | -13.473 | 1.00 | 0.00 |
| ATOM | 854 | HG22 | ILE | 55 | -4.097 | 3.729 | -12.091 | 1.00 | 0.00 |
| ATOM | 855 | HG23 | ILE | 55 | -3.867 | 5.477 | -11.849 | 1.00 | 0.00 |
| ATOM | 856 | CG1  | ILE | 55 | -1.495 | 3.160 | -12.828 | 1.00 | 0.00 |
| ATOM | 857 | HG12 | ILE | 55 | -1.697 | 3.250 | -13.896 | 1.00 | 0.00 |
| ATOM | 858 | HG13 | ILE | 55 | -0.418 | 3.133 | -12.663 | 1.00 | 0.00 |
| ATOM | 859 | CD1  | ILE | 55 | -2.099 | 1.923 | -12.318 | 1.00 | 0.00 |
| ATOM | 860 | HD11 | ILE | 55 | -3.176 | 1.949 | -12.483 | 1.00 | 0.00 |
| ATOM | 861 | HD12 | ILE | 55 | -1.673 | 1.068 | -12.842 | 1.00 | 0.00 |
| ATOM | 862 | HD13 | ILE | 55 | -1.898 | 1.833 | -11.251 | 1.00 | 0.00 |
| ATOM | 863 | C    | ILE | 55 | -1.763 | 6.918 | -12.181 | 1.00 | 0.00 |

|      |     |      |     |    |        |        |         |      |      |
|------|-----|------|-----|----|--------|--------|---------|------|------|
| ATOM | 864 | O    | ILE | 55 | -2.374 | 7.577  | -13.022 | 1.00 | 0.00 |
| ATOM | 865 | N    | CYX | 56 | -1.549 | 7.255  | -10.940 | 1.00 | 0.00 |
| ATOM | 866 | H    | CYX | 56 | -1.205 | 6.539  | -10.317 | 1.00 | 0.00 |
| ATOM | 867 | CA   | CYX | 56 | -1.926 | 8.556  | -10.367 | 1.00 | 0.00 |
| ATOM | 868 | HA   | CYX | 56 | -2.907 | 8.859  | -10.734 | 1.00 | 0.00 |
| ATOM | 869 | CB   | CYX | 56 | -1.986 | 8.449  | -8.841  | 1.00 | 0.00 |
| ATOM | 870 | HB2  | CYX | 56 | -0.981 | 8.302  | -8.447  | 1.00 | 0.00 |
| ATOM | 871 | HB3  | CYX | 56 | -2.407 | 9.366  | -8.428  | 1.00 | 0.00 |
| ATOM | 872 | SG   | CYX | 56 | -3.235 | 7.226  | -8.244  | 1.00 | 0.00 |
| ATOM | 873 | C    | CYX | 56 | -1.140 | 9.735  | -10.776 | 1.00 | 0.00 |
| ATOM | 874 | O    | CYX | 56 | -1.455 | 10.839 | -10.352 | 1.00 | 0.00 |
| ATOM | 875 | N    | ASN | 57 | -0.003 | 9.508  | -11.420 | 1.00 | 0.00 |
| ATOM | 876 | H    | ASN | 57 | 0.276  | 8.550  | -11.577 | 1.00 | 0.00 |
| ATOM | 877 | CA   | ASN | 57 | 0.953  | 10.583 | -11.768 | 1.00 | 0.00 |
| ATOM | 878 | HA   | ASN | 57 | 1.819  | 10.183 | -12.296 | 1.00 | 0.00 |
| ATOM | 879 | CB   | ASN | 57 | 0.239  | 11.561 | -12.681 | 1.00 | 0.00 |
| ATOM | 880 | HB2  | ASN | 57 | -0.770 | 11.224 | -12.921 | 1.00 | 0.00 |
| ATOM | 881 | HB3  | ASN | 57 | 0.186  | 12.501 | -12.132 | 1.00 | 0.00 |
| ATOM | 882 | CG   | ASN | 57 | 0.961  | 11.788 | -13.924 | 1.00 | 0.00 |
| ATOM | 883 | OD1  | ASN | 57 | 1.720  | 10.927 | -14.384 | 1.00 | 0.00 |
| ATOM | 884 | ND2  | ASN | 57 | 0.691  | 12.921 | -14.539 | 1.00 | 0.00 |
| ATOM | 885 | HD21 | ASN | 57 | 1.156  | 13.144 | -15.408 | 1.00 | 0.00 |

|      |     |      |     |    |        |        |         |      |      |
|------|-----|------|-----|----|--------|--------|---------|------|------|
| ATOM | 886 | HD22 | ASN | 57 | 0.020  | 13.562 | -14.140 | 1.00 | 0.00 |
| ATOM | 887 | C    | ASN | 57 | 1.575  | 11.177 | -10.560 | 1.00 | 0.00 |
| ATOM | 888 | O    | ASN | 57 | 1.856  | 12.408 | -10.544 | 1.00 | 0.00 |
| ATOM | 889 | N    | LEU | 58 | 1.815  | 10.393 | -9.510  | 1.00 | 0.00 |
| ATOM | 890 | H    | LEU | 58 | 1.562  | 9.419  | -9.597  | 1.00 | 0.00 |
| ATOM | 891 | CA   | LEU | 58 | 2.300  | 10.848 | -8.271  | 1.00 | 0.00 |
| ATOM | 892 | HA   | LEU | 58 | 2.373  | 11.935 | -8.323  | 1.00 | 0.00 |
| ATOM | 893 | CB   | LEU | 58 | 1.434  | 10.475 | -7.075  | 1.00 | 0.00 |
| ATOM | 894 | HB2  | LEU | 58 | 1.376  | 9.387  | -7.098  | 1.00 | 0.00 |
| ATOM | 895 | HB3  | LEU | 58 | 1.970  | 10.792 | -6.181  | 1.00 | 0.00 |
| ATOM | 896 | CG   | LEU | 58 | 0.058  | 11.044 | -7.055  | 1.00 | 0.00 |
| ATOM | 897 | HG   | LEU | 58 | -0.423 | 10.869 | -8.018  | 1.00 | 0.00 |
| ATOM | 898 | CD1  | LEU | 58 | -0.758 | 10.368 | -5.945  | 1.00 | 0.00 |
| ATOM | 899 | HD11 | LEU | 58 | -0.278 | 10.544 | -4.982  | 1.00 | 0.00 |
| ATOM | 900 | HD12 | LEU | 58 | -1.766 | 10.784 | -5.930  | 1.00 | 0.00 |
| ATOM | 901 | HD13 | LEU | 58 | -0.811 | 9.296  | -6.134  | 1.00 | 0.00 |
| ATOM | 902 | CD2  | LEU | 58 | 0.081  | 12.588 | -6.821  | 1.00 | 0.00 |
| ATOM | 903 | HD21 | LEU | 58 | 0.641  | 13.069 | -7.623  | 1.00 | 0.00 |
| ATOM | 904 | HD22 | LEU | 58 | -0.940 | 12.970 | -6.812  | 1.00 | 0.00 |
| ATOM | 905 | HD23 | LEU | 58 | 0.557  | 12.804 | -5.865  | 1.00 | 0.00 |
| ATOM | 906 | C    | LEU | 58 | 3.708  | 10.369 | -8.064  | 1.00 | 0.00 |
| ATOM | 907 | O    | LEU | 58 | 4.060  | 9.166  | -8.158  | 1.00 | 0.00 |

|      |     |      |     |    |       |        |         |      |      |
|------|-----|------|-----|----|-------|--------|---------|------|------|
| ATOM | 908 | N    | GLN | 59 | 4.586 | 11.233 | -7.651  | 1.00 | 0.00 |
| ATOM | 909 | H    | GLN | 59 | 4.344 | 12.213 | -7.600  | 1.00 | 0.00 |
| ATOM | 910 | CA   | GLN | 59 | 5.922 | 10.827 | -7.227  | 1.00 | 0.00 |
| ATOM | 911 | HA   | GLN | 59 | 6.360 | 10.164 | -7.973  | 1.00 | 0.00 |
| ATOM | 912 | CB   | GLN | 59 | 6.839 | 12.064 | -7.065  | 1.00 | 0.00 |
| ATOM | 913 | HB2  | GLN | 59 | 6.389 | 12.723 | -6.322  | 1.00 | 0.00 |
| ATOM | 914 | HB3  | GLN | 59 | 7.809 | 11.721 | -6.706  | 1.00 | 0.00 |
| ATOM | 915 | CG   | GLN | 59 | 7.015 | 12.797 | -8.326  | 1.00 | 0.00 |
| ATOM | 916 | HG2  | GLN | 59 | 6.019 | 12.899 | -8.758  | 1.00 | 0.00 |
| ATOM | 917 | HG3  | GLN | 59 | 7.415 | 13.786 | -8.101  | 1.00 | 0.00 |
| ATOM | 918 | CD   | GLN | 59 | 7.922 | 12.126 | -9.347  | 1.00 | 0.00 |
| ATOM | 919 | OE1  | GLN | 59 | 8.131 | 10.914 | -9.350  | 1.00 | 0.00 |
| ATOM | 920 | NE2  | GLN | 59 | 8.496 | 12.940 | -10.210 | 1.00 | 0.00 |
| ATOM | 921 | HE21 | GLN | 59 | 9.112 | 12.568 | -10.918 | 1.00 | 0.00 |
| ATOM | 922 | HE22 | GLN | 59 | 8.317 | 13.933 | -10.159 | 1.00 | 0.00 |
| ATOM | 923 | C    | GLN | 59 | 5.836 | 10.140 | -5.904  | 1.00 | 0.00 |
| ATOM | 924 | O    | GLN | 59 | 5.005 | 10.465 | -5.088  | 1.00 | 0.00 |
| ATOM | 925 | N    | PRO | 60 | 6.640 | 9.107  | -5.684  | 1.00 | 0.00 |
| ATOM | 926 | CD   | PRO | 60 | 6.654 | 8.386  | -4.394  | 1.00 | 0.00 |
| ATOM | 927 | HD2  | PRO | 60 | 5.672 | 7.952  | -4.207  | 1.00 | 0.00 |
| ATOM | 928 | HD3  | PRO | 60 | 6.904 | 9.079  | -3.590  | 1.00 | 0.00 |
| ATOM | 929 | CG   | PRO | 60 | 7.718 | 7.341  | -4.603  | 1.00 | 0.00 |

|      |     |         |    |       |       |         |      |      |
|------|-----|---------|----|-------|-------|---------|------|------|
| ATOM | 930 | HG2 PRO | 60 | 7.261 | 6.411 | -4.940  | 1.00 | 0.00 |
| ATOM | 931 | HG3 PRO | 60 | 8.252 | 7.166 | -3.670  | 1.00 | 0.00 |
| ATOM | 932 | CB PRO  | 60 | 8.623 | 7.904 | -5.633  | 1.00 | 0.00 |
| ATOM | 933 | HB2 PRO | 60 | 8.932 | 6.958 | -6.077  | 1.00 | 0.00 |
| ATOM | 934 | HB3 PRO | 60 | 9.502 | 8.518 | -5.439  | 1.00 | 0.00 |
| ATOM | 935 | CA PRO  | 60 | 7.674 | 8.637 | -6.581  | 1.00 | 0.00 |
| ATOM | 936 | HA PRO  | 60 | 8.079 | 9.415 | -7.229  | 1.00 | 0.00 |
| ATOM | 937 | C PRO   | 60 | 6.900 | 7.653 | -7.407  | 1.00 | 0.00 |
| ATOM | 938 | O PRO   | 60 | 5.884 | 7.124 | -6.953  | 1.00 | 0.00 |
| ATOM | 939 | N MET   | 61 | 7.311 | 7.339 | -8.562  | 1.00 | 0.00 |
| ATOM | 940 | H MET   | 61 | 8.218 | 7.509 | -8.971  | 1.00 | 0.00 |
| ATOM | 941 | CA MET  | 61 | 6.249 | 6.769 | -9.422  | 1.00 | 0.00 |
| ATOM | 942 | HA MET  | 61 | 5.260 | 7.136 | -9.147  | 1.00 | 0.00 |
| ATOM | 943 | CB MET  | 61 | 6.556 | 7.222 | -10.806 | 1.00 | 0.00 |
| ATOM | 944 | HB2 MET | 61 | 7.594 | 6.982 | -11.033 | 1.00 | 0.00 |
| ATOM | 945 | HB3 MET | 61 | 5.901 | 6.697 | -11.502 | 1.00 | 0.00 |
| ATOM | 946 | CG MET  | 61 | 6.342 | 8.721 | -10.943 | 1.00 | 0.00 |
| ATOM | 947 | HG2 MET | 61 | 6.303 | 9.150 | -9.942  | 1.00 | 0.00 |
| ATOM | 948 | HG3 MET | 61 | 7.193 | 9.136 | -11.483 | 1.00 | 0.00 |
| ATOM | 949 | SD MET  | 61 | 4.861 | 9.124 | -11.802 | 1.00 | 0.00 |
| ATOM | 950 | CE MET  | 61 | 5.012 | 8.473 | -13.375 | 1.00 | 0.00 |
| ATOM | 951 | HE1 MET | 61 | 5.140 | 7.393 | -13.311 | 1.00 | 0.00 |

|      |     |          |    |       |        |         |      |      |
|------|-----|----------|----|-------|--------|---------|------|------|
| ATOM | 952 | HE2 MET  | 61 | 4.113 | 8.698  | -13.950 | 1.00 | 0.00 |
| ATOM | 953 | HE3 MET  | 61 | 5.878 | 8.913  | -13.869 | 1.00 | 0.00 |
| ATOM | 954 | C MET    | 61 | 6.113 | 5.221  | -9.274  | 1.00 | 0.00 |
| ATOM | 955 | O MET    | 61 | 5.172 | 4.589  | -9.762  | 1.00 | 0.00 |
| ATOM | 956 | N ARG    | 62 | 6.986 | 4.664  | -8.475  | 1.00 | 0.00 |
| ATOM | 957 | H ARG    | 62 | 7.702 | 5.225  | -8.036  | 1.00 | 0.00 |
| ATOM | 958 | CA ARG   | 62 | 6.972 | 3.237  | -8.214  | 1.00 | 0.00 |
| ATOM | 959 | HA ARG   | 62 | 5.953 | 2.859  | -8.298  | 1.00 | 0.00 |
| ATOM | 960 | CB ARG   | 62 | 7.858 | 2.490  | -9.225  | 1.00 | 0.00 |
| ATOM | 961 | HB2 ARG  | 62 | 7.401 | 2.645  | -10.203 | 1.00 | 0.00 |
| ATOM | 962 | HB3 ARG  | 62 | 8.831 | 2.980  | -9.198  | 1.00 | 0.00 |
| ATOM | 963 | CG ARG   | 62 | 8.036 | 0.977  | -8.974  | 1.00 | 0.00 |
| ATOM | 964 | HG2 ARG  | 62 | 8.811 | 0.645  | -9.665  | 1.00 | 0.00 |
| ATOM | 965 | HG3 ARG  | 62 | 8.397 | 0.881  | -7.950  | 1.00 | 0.00 |
| ATOM | 966 | CD ARG   | 62 | 6.783 | 0.111  | -9.157  | 1.00 | 0.00 |
| ATOM | 967 | HD2 ARG  | 62 | 7.019 | -0.910 | -8.857  | 1.00 | 0.00 |
| ATOM | 968 | HD3 ARG  | 62 | 5.992 | 0.504  | -8.518  | 1.00 | 0.00 |
| ATOM | 969 | NE ARG   | 62 | 6.298 | 0.094  | -10.554 | 1.00 | 0.00 |
| ATOM | 970 | HE ARG   | 62 | 6.388 | 0.978  | -11.035 | 1.00 | 0.00 |
| ATOM | 971 | CZ ARG   | 62 | 5.758 | -0.944 | -11.216 | 1.00 | 0.00 |
| ATOM | 972 | NH1 ARG  | 62 | 5.572 | -2.154 | -10.656 | 1.00 | 0.00 |
| ATOM | 973 | HH11 ARG | 62 | 5.843 | -2.310 | -9.696  | 1.00 | 0.00 |

|      |     |      |     |    |        |        |         |      |      |
|------|-----|------|-----|----|--------|--------|---------|------|------|
| ATOM | 974 | HH12 | ARG | 62 | 5.161  | -2.900 | -11.199 | 1.00 | 0.00 |
| ATOM | 975 | NH2  | ARG | 62 | 5.403  | -0.760 | -12.496 | 1.00 | 0.00 |
| ATOM | 976 | HH21 | ARG | 62 | 5.545  | 0.140  | -12.932 | 1.00 | 0.00 |
| ATOM | 977 | HH22 | ARG | 62 | 4.995  | -1.522 | -13.018 | 1.00 | 0.00 |
| ATOM | 978 | C    | ARG | 62 | 7.478  | 3.044  | -6.800  | 1.00 | 0.00 |
| ATOM | 979 | O    | ARG | 62 | 8.259  | 3.857  | -6.252  | 1.00 | 0.00 |
| ATOM | 980 | N    | CYX | 63 | 6.953  | 2.021  | -6.161  | 1.00 | 0.00 |
| ATOM | 981 | H    | CYX | 63 | 6.260  | 1.456  | -6.631  | 1.00 | 0.00 |
| ATOM | 982 | CA   | CYX | 63 | 7.365  | 1.635  | -4.857  | 1.00 | 0.00 |
| ATOM | 983 | HA   | CYX | 63 | 7.962  | 2.425  | -4.401  | 1.00 | 0.00 |
| ATOM | 984 | CB   | CYX | 63 | 6.156  | 1.391  | -4.000  | 1.00 | 0.00 |
| ATOM | 985 | HB2  | CYX | 63 | 5.501  | 0.671  | -4.491  | 1.00 | 0.00 |
| ATOM | 986 | HB3  | CYX | 63 | 6.469  | 0.997  | -3.034  | 1.00 | 0.00 |
| ATOM | 987 | SG   | CYX | 63 | 5.225  | 2.941  | -3.878  | 1.00 | 0.00 |
| ATOM | 988 | C    | CYX | 63 | 8.133  | 0.300  | -4.954  | 1.00 | 0.00 |
| ATOM | 989 | O    | CYX | 63 | 7.560  | -0.721 | -5.378  | 1.00 | 0.00 |
| ATOM | 990 | N    | PRO | 64 | 9.399  | 0.300  | -4.537  | 1.00 | 0.00 |
| ATOM | 991 | CD   | PRO | 64 | 10.060 | 1.318  | -3.691  | 1.00 | 0.00 |
| ATOM | 992 | HD2  | PRO | 64 | 9.338  | 1.715  | -2.976  | 1.00 | 0.00 |
| ATOM | 993 | HD3  | PRO | 64 | 10.426 | 2.127  | -4.323  | 1.00 | 0.00 |
| ATOM | 994 | CG   | PRO | 64 | 11.170 | 0.563  | -3.029  | 1.00 | 0.00 |
| ATOM | 995 | HG2  | PRO | 64 | 10.861 | 0.287  | -2.021  | 1.00 | 0.00 |

|      |      |     |     |    |        |        |        |      |      |
|------|------|-----|-----|----|--------|--------|--------|------|------|
| ATOM | 996  | HG3 | PRO | 64 | 12.052 | 1.201  | -2.977 | 1.00 | 0.00 |
| ATOM | 997  | CB  | PRO | 64 | 11.435 | -0.652 | -3.874 | 1.00 | 0.00 |
| ATOM | 998  | HB2 | PRO | 64 | 11.798 | -1.479 | -3.264 | 1.00 | 0.00 |
| ATOM | 999  | HB3 | PRO | 64 | 12.160 | -0.433 | -4.658 | 1.00 | 0.00 |
| ATOM | 1000 | CA  | PRO | 64 | 10.093 | -1.017 | -4.495 | 1.00 | 0.00 |
| ATOM | 1001 | HA  | PRO | 64 | 10.161 | -1.358 | -5.528 | 1.00 | 0.00 |
| ATOM | 1002 | C   | PRO | 64 | 9.412  | -2.114 | -3.632 | 1.00 | 0.00 |
| ATOM | 1003 | O   | PRO | 64 | 9.304  | -3.303 | -4.037 | 1.00 | 0.00 |
| ATOM | 1004 | N   | PHE | 65 | 8.987  | -1.718 | -2.441 | 1.00 | 0.00 |
| ATOM | 1005 | H   | PHE | 65 | 8.997  | -0.732 | -2.221 | 1.00 | 0.00 |
| ATOM | 1006 | CA  | PHE | 65 | 8.629  | -2.654 | -1.392 | 1.00 | 0.00 |
| ATOM | 1007 | HA  | PHE | 65 | 8.535  | -2.131 | -0.440 | 1.00 | 0.00 |
| ATOM | 1008 | CB  | PHE | 65 | 7.282  | -3.321 | -1.722 | 1.00 | 0.00 |
| ATOM | 1009 | HB2 | PHE | 65 | 7.342  | -3.858 | -2.669 | 1.00 | 0.00 |
| ATOM | 1010 | HB3 | PHE | 65 | 7.005  | -4.014 | -0.928 | 1.00 | 0.00 |
| ATOM | 1011 | CG  | PHE | 65 | 6.128  | -2.327 | -1.856 | 1.00 | 0.00 |
| ATOM | 1012 | CD1 | PHE | 65 | 5.928  | -1.330 | -0.892 | 1.00 | 0.00 |
| ATOM | 1013 | HD1 | PHE | 65 | 6.618  | -1.263 | -0.051 | 1.00 | 0.00 |
| ATOM | 1014 | CE1 | PHE | 65 | 4.887  | -0.449 | -0.994 | 1.00 | 0.00 |
| ATOM | 1015 | HE1 | PHE | 65 | 4.737  | 0.333  | -0.249 | 1.00 | 0.00 |
| ATOM | 1016 | CZ  | PHE | 65 | 4.030  | -0.559 | -2.047 | 1.00 | 0.00 |
| ATOM | 1017 | HZ  | PHE | 65 | 3.189  | 0.131  | -2.118 | 1.00 | 0.00 |



|      |      |         |    |        |        |        |      |      |
|------|------|---------|----|--------|--------|--------|------|------|
| ATOM | 1018 | CE2 PHE | 65 | 4.209  | -1.503 | -2.994 | 1.00 | 0.00 |
| ATOM | 1019 | HE2 PHE | 65 | 3.506  | -1.570 | -3.825 | 1.00 | 0.00 |
| ATOM | 1020 | CD2 PHE | 65 | 5.266  | -2.375 | -2.918 | 1.00 | 0.00 |
| ATOM | 1021 | HD2 PHE | 65 | 5.423  | -3.111 | -3.706 | 1.00 | 0.00 |
| ATOM | 1022 | C PHE   | 65 | 9.744  | -3.699 | -1.100 | 1.00 | 0.00 |
| ATOM | 1023 | O PHE   | 65 | 9.438  | -4.792 | -0.653 | 1.00 | 0.00 |
| ATOM | 1024 | OXT PHE | 65 | 10.922 | -3.426 | -1.318 | 1.00 | 0.00 |

TER

|      |      |         |    |       |       |        |      |      |
|------|------|---------|----|-------|-------|--------|------|------|
| ATOM | 1025 | N GLN   | 66 | 4.699 | 8.695 | 14.347 | 1.00 | 0.00 |
| ATOM | 1026 | H1 GLN  | 66 | 3.722 | 8.879 | 14.165 | 1.00 | 0.00 |
| ATOM | 1027 | H2 GLN  | 66 | 5.072 | 9.448 | 14.907 | 1.00 | 0.00 |
| ATOM | 1028 | H3 GLN  | 66 | 4.797 | 7.739 | 14.656 | 1.00 | 0.00 |
| ATOM | 1029 | CA GLN  | 66 | 5.437 | 8.768 | 13.044 | 1.00 | 0.00 |
| ATOM | 1030 | HA GLN  | 66 | 6.191 | 9.553 | 13.104 | 1.00 | 0.00 |
| ATOM | 1031 | CB GLN  | 66 | 6.124 | 7.462 | 12.712 | 1.00 | 0.00 |
| ATOM | 1032 | HB2 GLN | 66 | 6.548 | 7.083 | 13.641 | 1.00 | 0.00 |
| ATOM | 1033 | HB3 GLN | 66 | 5.351 | 6.779 | 12.361 | 1.00 | 0.00 |
| ATOM | 1034 | CG GLN  | 66 | 7.211 | 7.570 | 11.670 | 1.00 | 0.00 |
| ATOM | 1035 | HG2 GLN | 66 | 7.381 | 8.631 | 11.485 | 1.00 | 0.00 |
| ATOM | 1036 | HG3 GLN | 66 | 8.125 | 7.117 | 12.052 | 1.00 | 0.00 |
| ATOM | 1037 | CD GLN  | 66 | 6.859 | 6.916 | 10.385 | 1.00 | 0.00 |
| ATOM | 1038 | OE1 GLN | 66 | 5.580 | 6.786 | 10.128 | 1.00 | 0.00 |

|      |      |      |     |    |       |        |        |      |      |
|------|------|------|-----|----|-------|--------|--------|------|------|
| ATOM | 1039 | NE2  | GLN | 66 | 7.740 | 6.504  | 9.628  | 1.00 | 0.00 |
| ATOM | 1040 | HE21 | GLN | 66 | 7.486 | 6.061  | 8.756  | 1.00 | 0.00 |
| ATOM | 1041 | HE22 | GLN | 66 | 8.711 | 6.612  | 9.883  | 1.00 | 0.00 |
| ATOM | 1042 | C    | GLN | 66 | 4.576 | 9.225  | 11.881 | 1.00 | 0.00 |
| ATOM | 1043 | O    | GLN | 66 | 3.375 | 8.941  | 11.795 | 1.00 | 0.00 |
| ATOM | 1044 | N    | ARG | 67 | 5.237 | 9.974  | 11.003 | 1.00 | 0.00 |
| ATOM | 1045 | H    | ARG | 67 | 6.242 | 9.901  | 10.943 | 1.00 | 0.00 |
| ATOM | 1046 | CA   | ARG | 67 | 4.570 | 10.926 | 10.154 | 1.00 | 0.00 |
| ATOM | 1047 | HA   | ARG | 67 | 3.911 | 11.571 | 10.735 | 1.00 | 0.00 |
| ATOM | 1048 | CB   | ARG | 67 | 5.649 | 11.807 | 9.469  | 1.00 | 0.00 |
| ATOM | 1049 | HB2  | ARG | 67 | 6.254 | 12.215 | 10.278 | 1.00 | 0.00 |
| ATOM | 1050 | HB3  | ARG | 67 | 6.253 | 11.124 | 8.872  | 1.00 | 0.00 |
| ATOM | 1051 | CG   | ARG | 67 | 5.149 | 12.944 | 8.587  | 1.00 | 0.00 |
| ATOM | 1052 | HG2  | ARG | 67 | 6.017 | 13.441 | 8.153  | 1.00 | 0.00 |
| ATOM | 1053 | HG3  | ARG | 67 | 4.543 | 12.512 | 7.791  | 1.00 | 0.00 |
| ATOM | 1054 | CD   | ARG | 67 | 4.317 | 13.961 | 9.364  | 1.00 | 0.00 |
| ATOM | 1055 | HD2  | ARG | 67 | 3.992 | 13.501 | 10.297 | 1.00 | 0.00 |
| ATOM | 1056 | HD3  | ARG | 67 | 4.945 | 14.824 | 9.585  | 1.00 | 0.00 |
| ATOM | 1057 | NE   | ARG | 67 | 3.127 | 14.420 | 8.624  | 1.00 | 0.00 |
| ATOM | 1058 | HE   | ARG | 67 | 3.226 | 14.457 | 7.619  | 1.00 | 0.00 |
| ATOM | 1059 | CZ   | ARG | 67 | 1.954 | 14.789 | 9.166  | 1.00 | 0.00 |
| ATOM | 1060 | NH1  | ARG | 67 | 1.747 | 14.752 | 10.488 | 1.00 | 0.00 |

|      |      |      |     |    |       |        |        |      |      |
|------|------|------|-----|----|-------|--------|--------|------|------|
| ATOM | 1061 | HH11 | ARG | 67 | 2.485 | 14.441 | 11.103 | 1.00 | 0.00 |
| ATOM | 1062 | HH12 | ARG | 67 | 0.853 | 15.036 | 10.864 | 1.00 | 0.00 |
| ATOM | 1063 | NH2  | ARG | 67 | 0.960 | 15.199 | 8.372  | 1.00 | 0.00 |
| ATOM | 1064 | HH21 | ARG | 67 | 1.096 | 15.229 | 7.371  | 1.00 | 0.00 |
| ATOM | 1065 | HH22 | ARG | 67 | 0.077 | 15.477 | 8.776  | 1.00 | 0.00 |
| ATOM | 1066 | C    | ARG | 67 | 3.708 | 10.140 | 9.123  | 1.00 | 0.00 |
| ATOM | 1067 | O    | ARG | 67 | 2.511 | 10.400 | 8.951  | 1.00 | 0.00 |
| ATOM | 1068 | N    | CYX | 68 | 4.363 | 9.174  | 8.516  | 1.00 | 0.00 |
| ATOM | 1069 | H    | CYX | 68 | 5.323 | 8.968  | 8.753  | 1.00 | 0.00 |
| ATOM | 1070 | CA   | CYX | 68 | 3.714 | 8.379  | 7.420  | 1.00 | 0.00 |
| ATOM | 1071 | HA   | CYX | 68 | 3.350 | 9.048  | 6.639  | 1.00 | 0.00 |
| ATOM | 1072 | CB   | CYX | 68 | 4.692 | 7.445  | 6.824  | 1.00 | 0.00 |
| ATOM | 1073 | HB2  | CYX | 68 | 5.106 | 6.806  | 7.603  | 1.00 | 0.00 |
| ATOM | 1074 | HB3  | CYX | 68 | 4.196 | 6.828  | 6.075  | 1.00 | 0.00 |
| ATOM | 1075 | SG   | CYX | 68 | 6.061 | 8.383  | 6.055  | 1.00 | 0.00 |
| ATOM | 1076 | C    | CYX | 68 | 2.538 | 7.637  | 7.978  | 1.00 | 0.00 |
| ATOM | 1077 | O    | CYX | 68 | 1.445 | 7.624  | 7.384  | 1.00 | 0.00 |
| ATOM | 1078 | N    | ARG | 69 | 2.670 | 7.095  | 9.199  | 1.00 | 0.00 |
| ATOM | 1079 | H    | ARG | 69 | 3.524 | 7.102  | 9.738  | 1.00 | 0.00 |
| ATOM | 1080 | CA   | ARG | 69 | 1.495 | 6.364  | 9.747  | 1.00 | 0.00 |
| ATOM | 1081 | HA   | ARG | 69 | 1.125 | 5.661  | 9.000  | 1.00 | 0.00 |
| ATOM | 1082 | CB   | ARG | 69 | 1.870 | 5.577  | 11.024 | 1.00 | 0.00 |

|      |      |      |     |    |        |       |        |      |      |
|------|------|------|-----|----|--------|-------|--------|------|------|
| ATOM | 1083 | HB2  | ARG | 69 | 2.257  | 6.271 | 11.770 | 1.00 | 0.00 |
| ATOM | 1084 | HB3  | ARG | 69 | 0.979  | 5.085 | 11.414 | 1.00 | 0.00 |
| ATOM | 1085 | CG   | ARG | 69 | 2.915  | 4.546 | 10.710 | 1.00 | 0.00 |
| ATOM | 1086 | HG2  | ARG | 69 | 2.593  | 4.005 | 9.820  | 1.00 | 0.00 |
| ATOM | 1087 | HG3  | ARG | 69 | 3.847  | 5.069 | 10.499 | 1.00 | 0.00 |
| ATOM | 1088 | CD   | ARG | 69 | 3.130  | 3.572 | 11.840 | 1.00 | 0.00 |
| ATOM | 1089 | HD2  | ARG | 69 | 2.201  | 3.046 | 12.062 | 1.00 | 0.00 |
| ATOM | 1090 | HD3  | ARG | 69 | 3.900  | 2.850 | 11.570 | 1.00 | 0.00 |
| ATOM | 1091 | NE   | ARG | 69 | 3.562  | 4.292 | 13.043 | 1.00 | 0.00 |
| ATOM | 1092 | HE   | ARG | 69 | 2.820  | 4.620 | 13.645 | 1.00 | 0.00 |
| ATOM | 1093 | CZ   | ARG | 69 | 4.828  | 4.533 | 13.400 | 1.00 | 0.00 |
| ATOM | 1094 | NH1  | ARG | 69 | 5.867  | 4.120 | 12.663 | 1.00 | 0.00 |
| ATOM | 1095 | HH11 | ARG | 69 | 5.703  | 3.609 | 11.807 | 1.00 | 0.00 |
| ATOM | 1096 | HH12 | ARG | 69 | 6.809  | 4.322 | 12.966 | 1.00 | 0.00 |
| ATOM | 1097 | NH2  | ARG | 69 | 5.043  | 5.217 | 14.524 | 1.00 | 0.00 |
| ATOM | 1098 | HH21 | ARG | 69 | 4.259  | 5.535 | 15.075 | 1.00 | 0.00 |
| ATOM | 1099 | HH22 | ARG | 69 | 5.988  | 5.414 | 14.818 | 1.00 | 0.00 |
| ATOM | 1100 | C    | ARG | 69 | 0.378  | 7.258 | 10.017 | 1.00 | 0.00 |
| ATOM | 1101 | O    | ARG | 69 | -0.776 | 6.944 | 9.788  | 1.00 | 0.00 |
| ATOM | 1102 | N    | HIE | 70 | 0.681  | 8.437 | 10.532 | 1.00 | 0.00 |
| ATOM | 1103 | H    | HIE | 70 | 1.631  | 8.693 | 10.761 | 1.00 | 0.00 |
| ATOM | 1104 | CA   | HIE | 70 | -0.335 | 9.366 | 10.783 | 1.00 | 0.00 |

|      |      |     |     |    |        |        |        |      |      |
|------|------|-----|-----|----|--------|--------|--------|------|------|
| ATOM | 1105 | HA  | HIE | 70 | -1.098 | 8.913  | 11.417 | 1.00 | 0.00 |
| ATOM | 1106 | CB  | HIE | 70 | 0.222  | 10.605 | 11.496 | 1.00 | 0.00 |
| ATOM | 1107 | HB2 | HIE | 70 | 0.694  | 10.368 | 12.449 | 1.00 | 0.00 |
| ATOM | 1108 | HB3 | HIE | 70 | 0.948  | 11.084 | 10.840 | 1.00 | 0.00 |
| ATOM | 1109 | CG  | HIE | 70 | -0.836 | 11.629 | 11.785 | 1.00 | 0.00 |
| ATOM | 1110 | ND1 | HIE | 70 | -1.964 | 11.345 | 12.535 | 1.00 | 0.00 |
| ATOM | 1111 | CE1 | HIE | 70 | -2.728 | 12.422 | 12.598 | 1.00 | 0.00 |
| ATOM | 1112 | HE1 | HIE | 70 | -3.667 | 12.405 | 13.151 | 1.00 | 0.00 |
| ATOM | 1113 | NE2 | HIE | 70 | -2.142 | 13.391 | 11.912 | 1.00 | 0.00 |
| ATOM | 1114 | HE2 | HIE | 70 | -2.498 | 14.329 | 11.789 | 1.00 | 0.00 |
| ATOM | 1115 | CD2 | HIE | 70 | -0.963 | 12.920 | 11.387 | 1.00 | 0.00 |
| ATOM | 1116 | HD2 | HIE | 70 | -0.339 | 13.574 | 10.778 | 1.00 | 0.00 |
| ATOM | 1117 | C   | HIE | 70 | -1.017 | 9.833  | 9.484  | 1.00 | 0.00 |
| ATOM | 1118 | O   | HIE | 70 | -2.205 | 9.963  | 9.454  | 1.00 | 0.00 |
| ATOM | 1119 | N   | GLN | 71 | -0.251 | 10.038 | 8.442  | 1.00 | 0.00 |
| ATOM | 1120 | H   | GLN | 71 | 0.750  | 9.907  | 8.460  | 1.00 | 0.00 |
| ATOM | 1121 | CA  | GLN | 71 | -0.869 | 10.493 | 7.196  | 1.00 | 0.00 |
| ATOM | 1122 | HA  | GLN | 71 | -1.481 | 11.381 | 7.357  | 1.00 | 0.00 |
| ATOM | 1123 | CB  | GLN | 71 | 0.236  | 10.839 | 6.253  | 1.00 | 0.00 |
| ATOM | 1124 | HB2 | GLN | 71 | 0.988  | 10.051 | 6.291  | 1.00 | 0.00 |
| ATOM | 1125 | HB3 | GLN | 71 | -0.172 | 10.903 | 5.244  | 1.00 | 0.00 |
| ATOM | 1126 | CG  | GLN | 71 | 0.877  | 12.171 | 6.627  | 1.00 | 0.00 |

|      |      |      |     |    |        |        |       |      |      |
|------|------|------|-----|----|--------|--------|-------|------|------|
| ATOM | 1127 | HG2  | GLN | 71 | 0.079  | 12.912 | 6.690 | 1.00 | 0.00 |
| ATOM | 1128 | HG3  | GLN | 71 | 1.452  | 12.178 | 7.552 | 1.00 | 0.00 |
| ATOM | 1129 | CD   | GLN | 71 | 1.761  | 12.532 | 5.526 | 1.00 | 0.00 |
| ATOM | 1130 | OE1  | GLN | 71 | 1.274  | 12.737 | 4.450 | 1.00 | 0.00 |
| ATOM | 1131 | NE2  | GLN | 71 | 3.033  | 12.520 | 5.733 | 1.00 | 0.00 |
| ATOM | 1132 | HE21 | GLN | 71 | 3.665  | 12.767 | 4.985 | 1.00 | 0.00 |
| ATOM | 1133 | HE22 | GLN | 71 | 3.391  | 12.265 | 6.642 | 1.00 | 0.00 |
| ATOM | 1134 | C    | GLN | 71 | -1.778 | 9.412  | 6.564 | 1.00 | 0.00 |
| ATOM | 1135 | O    | GLN | 71 | -2.850 | 9.713  | 6.062 | 1.00 | 0.00 |
| ATOM | 1136 | N    | PHE | 72 | -1.362 | 8.168  | 6.683 | 1.00 | 0.00 |
| ATOM | 1137 | H    | PHE | 72 | -0.445 | 7.978  | 7.060 | 1.00 | 0.00 |
| ATOM | 1138 | CA   | PHE | 72 | -2.176 | 7.041  | 6.244 | 1.00 | 0.00 |
| ATOM | 1139 | HA   | PHE | 72 | -2.389 | 7.113  | 5.177 | 1.00 | 0.00 |
| ATOM | 1140 | CB   | PHE | 72 | -1.396 | 5.731  | 6.505 | 1.00 | 0.00 |
| ATOM | 1141 | HB2  | PHE | 72 | -0.509 | 5.637  | 5.879 | 1.00 | 0.00 |
| ATOM | 1142 | HB3  | PHE | 72 | -1.104 | 5.712  | 7.555 | 1.00 | 0.00 |
| ATOM | 1143 | CG   | PHE | 72 | -2.217 | 4.509  | 6.268 | 1.00 | 0.00 |
| ATOM | 1144 | CD1  | PHE | 72 | -2.479 | 4.083  | 4.948 | 1.00 | 0.00 |
| ATOM | 1145 | HD1  | PHE | 72 | -2.064 | 4.637  | 4.106 | 1.00 | 0.00 |
| ATOM | 1146 | CE1  | PHE | 72 | -3.262 | 2.965  | 4.722 | 1.00 | 0.00 |
| ATOM | 1147 | HE1  | PHE | 72 | -3.500 | 2.689  | 3.694 | 1.00 | 0.00 |
| ATOM | 1148 | CZ   | PHE | 72 | -3.741 | 2.203  | 5.770 | 1.00 | 0.00 |

|      |      |          |    |        |        |        |      |      |
|------|------|----------|----|--------|--------|--------|------|------|
| ATOM | 1149 | HZ PHE   | 72 | -4.316 | 1.296  | 5.585  | 1.00 | 0.00 |
| ATOM | 1150 | CE2 PHE  | 72 | -3.475 | 2.617  | 7.104  | 1.00 | 0.00 |
| ATOM | 1151 | HE2 PHE  | 72 | -3.886 | 2.059  | 7.945  | 1.00 | 0.00 |
| ATOM | 1152 | CD2 PHE  | 72 | -2.690 | 3.735  | 7.332  | 1.00 | 0.00 |
| ATOM | 1153 | HD2 PHE  | 72 | -2.433 | 4.022  | 8.351  | 1.00 | 0.00 |
| ATOM | 1154 | C PHE    | 72 | -3.530 | 6.990  | 6.951  | 1.00 | 0.00 |
| ATOM | 1155 | O PHE    | 72 | -4.571 | 6.977  | 6.351  | 1.00 | 0.00 |
| ATOM | 1156 | N GLN    | 73 | -3.489 | 7.133  | 8.295  | 1.00 | 0.00 |
| ATOM | 1157 | H GLN    | 73 | -2.677 | 6.633  | 8.626  | 1.00 | 0.00 |
| ATOM | 1158 | CA GLN   | 73 | -4.691 | 7.107  | 9.105  | 1.00 | 0.00 |
| ATOM | 1159 | HA GLN   | 73 | -4.223 | 7.318  | 10.066 | 1.00 | 0.00 |
| ATOM | 1160 | CB GLN   | 73 | -3.600 | 7.008  | 8.043  | 1.00 | 0.00 |
| ATOM | 1161 | HB2 GLN  | 73 | -2.916 | 6.199  | 8.299  | 1.00 | 0.00 |
| ATOM | 1162 | HB3 GLN  | 73 | -4.054 | 6.806  | 7.073  | 1.00 | 0.00 |
| ATOM | 1163 | CG GLN   | 73 | -2.831 | 8.323  | 7.980  | 1.00 | 0.00 |
| ATOM | 1164 | HG2 GLN  | 73 | -3.514 | 9.132  | 7.724  | 1.00 | 0.00 |
| ATOM | 1165 | HG3 GLN  | 73 | -2.376 | 8.525  | 8.950  | 1.00 | 0.00 |
| ATOM | 1166 | CD GLN   | 73 | -1.731 | 8.264  | 6.930  | 1.00 | 0.00 |
| ATOM | 1167 | OE1 GLN  | 73 | -1.557 | 7.246  | 6.265  | 1.00 | 0.00 |
| ATOM | 1168 | NE2 GLN  | 73 | -0.986 | 9.363  | 6.783  | 1.00 | 0.00 |
| ATOM | 1169 | HE21 GLN | 73 | -0.242 | 9.377  | 6.099  | 1.00 | 0.00 |
| ATOM | 1170 | HE22 GLN | 73 | -1.170 | 10.174 | 7.355  | 1.00 | 0.00 |

|      |      |      |     |    |        |        |       |      |      |
|------|------|------|-----|----|--------|--------|-------|------|------|
| ATOM | 1171 | C    | GLN | 73 | -5.604 | 8.290  | 8.732 | 1.00 | 0.00 |
| ATOM | 1172 | O    | GLN | 73 | -6.826 | 8.167  | 8.540 | 1.00 | 0.00 |
| ATOM | 1173 | N    | THR | 74 | -4.984 | 9.464  | 8.573 | 1.00 | 0.00 |
| ATOM | 1174 | H    | THR | 74 | -3.989 | 9.537  | 8.726 | 1.00 | 0.00 |
| ATOM | 1175 | CA   | THR | 74 | -5.709 | 10.655 | 8.240 | 1.00 | 0.00 |
| ATOM | 1176 | HA   | THR | 74 | -6.577 | 10.807 | 8.881 | 1.00 | 0.00 |
| ATOM | 1177 | CB   | THR | 74 | -4.800 | 11.891 | 8.342 | 1.00 | 0.00 |
| ATOM | 1178 | HB   | THR | 74 | -3.950 | 11.767 | 7.672 | 1.00 | 0.00 |
| ATOM | 1179 | CG2  | THR | 74 | -5.571 | 13.139 | 7.953 | 1.00 | 0.00 |
| ATOM | 1180 | HG21 | THR | 74 | -6.422 | 13.265 | 8.623 | 1.00 | 0.00 |
| ATOM | 1181 | HG22 | THR | 74 | -4.918 | 14.009 | 8.028 | 1.00 | 0.00 |
| ATOM | 1182 | HG23 | THR | 74 | -5.928 | 13.042 | 6.927 | 1.00 | 0.00 |
| ATOM | 1183 | OG1  | THR | 74 | -4.271 | 11.979 | 9.666 | 1.00 | 0.00 |
| ATOM | 1184 | HG1  | THR | 74 | -3.703 | 12.750 | 9.733 | 1.00 | 0.00 |
| ATOM | 1185 | C    | THR | 74 | -6.342 | 10.648 | 6.857 | 1.00 | 0.00 |
| ATOM | 1186 | O    | THR | 74 | -7.490 | 11.137 | 6.665 | 1.00 | 0.00 |
| ATOM | 1187 | N    | GLN | 75 | -5.659 | 10.003 | 5.890 | 1.00 | 0.00 |
| ATOM | 1188 | H    | GLN | 75 | -4.706 | 9.695  | 6.015 | 1.00 | 0.00 |
| ATOM | 1189 | CA   | GLN | 75 | -6.262 | 9.888  | 4.544 | 1.00 | 0.00 |
| ATOM | 1190 | HA   | GLN | 75 | -7.021 | 10.658 | 4.403 | 1.00 | 0.00 |
| ATOM | 1191 | CB   | GLN | 75 | -5.178 | 10.069 | 3.480 | 1.00 | 0.00 |
| ATOM | 1192 | HB2  | GLN | 75 | -4.458 | 9.264  | 3.622 | 1.00 | 0.00 |



|      |      |      |     |    |         |        |       |      |      |
|------|------|------|-----|----|---------|--------|-------|------|------|
| ATOM | 1193 | HB3  | GLN | 75 | -5.664  | 9.955  | 2.511 | 1.00 | 0.00 |
| ATOM | 1194 | CG   | GLN | 75 | -4.467  | 11.391 | 3.531 | 1.00 | 0.00 |
| ATOM | 1195 | HG2  | GLN | 75 | -3.893  | 11.425 | 4.457 | 1.00 | 0.00 |
| ATOM | 1196 | HG3  | GLN | 75 | -3.790  | 11.471 | 2.680 | 1.00 | 0.00 |
| ATOM | 1197 | CD   | GLN | 75 | -5.427  | 12.586 | 3.506 | 1.00 | 0.00 |
| ATOM | 1198 | OE1  | GLN | 75 | -6.449  | 12.558 | 2.832 | 1.00 | 0.00 |
| ATOM | 1199 | NE2  | GLN | 75 | -5.081  | 13.599 | 4.208 | 1.00 | 0.00 |
| ATOM | 1200 | HE21 | GLN | 75 | -5.672  | 14.418 | 4.233 | 1.00 | 0.00 |
| ATOM | 1201 | HE22 | GLN | 75 | -4.219  | 13.575 | 4.734 | 1.00 | 0.00 |
| ATOM | 1202 | C    | GLN | 75 | -7.086  | 8.595  | 4.367 | 1.00 | 0.00 |
| ATOM | 1203 | O    | GLN | 75 | -7.046  | 7.859  | 3.341 | 1.00 | 0.00 |
| ATOM | 1204 | N    | GLN | 76 | -7.919  | 8.321  | 5.362 | 1.00 | 0.00 |
| ATOM | 1205 | H    | GLN | 76 | -7.779  | 8.758  | 6.262 | 1.00 | 0.00 |
| ATOM | 1206 | CA   | GLN | 76 | -8.951  | 7.313  | 5.241 | 1.00 | 0.00 |
| ATOM | 1207 | HA   | GLN | 76 | -9.485  | 7.238  | 6.188 | 1.00 | 0.00 |
| ATOM | 1208 | CB   | GLN | 76 | -9.964  | 7.648  | 4.131 | 1.00 | 0.00 |
| ATOM | 1209 | HB2  | GLN | 76 | -9.629  | 7.068  | 3.271 | 1.00 | 0.00 |
| ATOM | 1210 | HB3  | GLN | 76 | -10.910 | 7.246  | 4.494 | 1.00 | 0.00 |
| ATOM | 1211 | CG   | GLN | 76 | -10.158 | 9.118  | 3.713 | 1.00 | 0.00 |
| ATOM | 1212 | HG2  | GLN | 76 | -9.223  | 9.482  | 3.288 | 1.00 | 0.00 |
| ATOM | 1213 | HG3  | GLN | 76 | -10.936 | 9.140  | 2.949 | 1.00 | 0.00 |
| ATOM | 1214 | CD   | GLN | 76 | -10.565 | 10.036 | 4.843 | 1.00 | 0.00 |

|      |      |      |     |    |         |        |       |      |      |
|------|------|------|-----|----|---------|--------|-------|------|------|
| ATOM | 1215 | OE1  | GLN | 76 | -9.946  | 11.080 | 5.073 | 1.00 | 0.00 |
| ATOM | 1216 | NE2  | GLN | 76 | -11.623 | 9.659  | 5.551 | 1.00 | 0.00 |
| ATOM | 1217 | HE21 | GLN | 76 | -11.943 | 10.232 | 6.319 | 1.00 | 0.00 |
| ATOM | 1218 | HE22 | GLN | 76 | -12.103 | 8.802  | 5.318 | 1.00 | 0.00 |
| ATOM | 1219 | C    | GLN | 76 | -8.308  | 5.944  | 5.060 | 1.00 | 0.00 |
| ATOM | 1220 | O    | GLN | 76 | -8.895  | 5.058  | 4.435 | 1.00 | 0.00 |
| ATOM | 1221 | N    | ARG | 77 | -7.112  | 5.741  | 5.602 | 1.00 | 0.00 |
| ATOM | 1222 | H    | ARG | 77 | -7.869  | 5.814  | 6.267 | 1.00 | 0.00 |
| ATOM | 1223 | CA   | ARG | 77 | -6.423  | 4.472  | 5.482 | 1.00 | 0.00 |
| ATOM | 1224 | HA   | ARG | 77 | -7.350  | 5.040  | 5.567 | 1.00 | 0.00 |
| ATOM | 1225 | CB   | ARG | 77 | -5.262  | 5.371  | 5.895 | 1.00 | 0.00 |
| ATOM | 1226 | HB2  | ARG | 77 | -5.399  | 5.692  | 6.928 | 1.00 | 0.00 |
| ATOM | 1227 | HB3  | ARG | 77 | -4.326  | 4.820  | 5.807 | 1.00 | 0.00 |
| ATOM | 1228 | CG   | ARG | 77 | -5.219  | 6.595  | 4.985 | 1.00 | 0.00 |
| ATOM | 1229 | HG2  | ARG | 77 | -5.081  | 6.275  | 3.952 | 1.00 | 0.00 |
| ATOM | 1230 | HG3  | ARG | 77 | -6.154  | 7.147  | 5.073 | 1.00 | 0.00 |
| ATOM | 1231 | CD   | ARG | 77 | -4.058  | 7.494  | 5.398 | 1.00 | 0.00 |
| ATOM | 1232 | HD2  | ARG | 77 | -4.195  | 7.814  | 6.431 | 1.00 | 0.00 |
| ATOM | 1233 | HD3  | ARG | 77 | -3.122  | 6.942  | 5.310 | 1.00 | 0.00 |
| ATOM | 1234 | NE   | ARG | 77 | -3.984  | 8.694  | 4.535 | 1.00 | 0.00 |
| ATOM | 1235 | HE   | ARG | 77 | -4.667  | 8.801  | 3.798 | 1.00 | 0.00 |
| ATOM | 1236 | CZ   | ARG | 77 | -3.060  | 9.639  | 4.686 | 1.00 | 0.00 |

|      |      |      |     |    |        |        |        |      |      |
|------|------|------|-----|----|--------|--------|--------|------|------|
| ATOM | 1237 | NH1  | ARG | 77 | -2.128 | 9.569  | 5.632  | 1.00 | 0.00 |
| ATOM | 1238 | HH11 | ARG | 77 | -2.111 | 8.779  | 6.262  | 1.00 | 0.00 |
| ATOM | 1239 | HH12 | ARG | 77 | -1.442 | 10.305 | 5.717  | 1.00 | 0.00 |
| ATOM | 1240 | NH2  | ARG | 77 | -3.086 | 10.676 | 3.854  | 1.00 | 0.00 |
| ATOM | 1241 | HH21 | ARG | 77 | -3.795 | 10.726 | 3.136  | 1.00 | 0.00 |
| ATOM | 1242 | HH22 | ARG | 77 | -2.397 | 11.409 | 3.944  | 1.00 | 0.00 |
| ATOM | 1243 | C    | ARG | 77 | -6.219 | 4.090  | 4.030  | 1.00 | 0.00 |
| ATOM | 1244 | O    | ARG | 77 | -6.137 | 2.917  | 3.688  | 1.00 | 0.00 |
| ATOM | 1245 | N    | LEU | 78 | -6.154 | 5.107  | 3.174  | 1.00 | 0.00 |
| ATOM | 1246 | H    | LEU | 78 | -6.199 | 6.063  | 3.497  | 1.00 | 0.00 |
| ATOM | 1247 | CA   | LEU | 78 | -6.154 | 4.850  | 1.664  | 1.00 | 0.00 |
| ATOM | 1248 | HA   | LEU | 78 | -6.484 | 5.747  | 1.139  | 1.00 | 0.00 |
| ATOM | 1249 | CB   | LEU | 78 | -4.761 | 4.490  | 1.181  | 1.00 | 0.00 |
| ATOM | 1250 | HB2  | LEU | 78 | -4.598 | 3.546  | 1.700  | 1.00 | 0.00 |
| ATOM | 1251 | HB3  | LEU | 78 | -4.805 | 4.310  | 0.107  | 1.00 | 0.00 |
| ATOM | 1252 | CG   | LEU | 78 | -3.614 | 5.444  | 1.489  | 1.00 | 0.00 |
| ATOM | 1253 | HG   | LEU | 78 | -3.505 | 5.529  | 2.570  | 1.00 | 0.00 |
| ATOM | 1254 | CD1  | LEU | 78 | -2.326 | 4.933  | 0.892  | 1.00 | 0.00 |
| ATOM | 1255 | HD11 | LEU | 78 | -2.435 | 4.848  | -0.189 | 1.00 | 0.00 |
| ATOM | 1256 | HD12 | LEU | 78 | -1.518 | 5.627  | 1.122  | 1.00 | 0.00 |
| ATOM | 1257 | HD13 | LEU | 78 | -2.094 | 3.954  | 1.311  | 1.00 | 0.00 |
| ATOM | 1258 | CD2  | LEU | 78 | -3.980 | 6.877  | 1.000  | 1.00 | 0.00 |

|      |      |      |     |    |         |       |        |      |      |
|------|------|------|-----|----|---------|-------|--------|------|------|
| ATOM | 1259 | HD21 | LEU | 78 | -4.881  | 7.217 | 1.511  | 1.00 | 0.00 |
| ATOM | 1260 | HD22 | LEU | 78 | -3.158  | 7.558 | 1.221  | 1.00 | 0.00 |
| ATOM | 1261 | HD23 | LEU | 78 | -4.158  | 6.861 | -0.076 | 1.00 | 0.00 |
| ATOM | 1262 | C    | LEU | 78 | -7.190  | 3.815 | 1.289  | 1.00 | 0.00 |
| ATOM | 1263 | O    | LEU | 78 | -6.974  | 2.899 | 0.435  | 1.00 | 0.00 |
| ATOM | 1264 | N    | ARG | 79 | -8.393  | 3.943 | 1.882  | 1.00 | 0.00 |
| ATOM | 1265 | H    | ARG | 79 | -8.586  | 4.715 | 2.505  | 1.00 | 0.00 |
| ATOM | 1266 | CA   | ARG | 79 | -9.435  | 2.945 | 1.675  | 1.00 | 0.00 |
| ATOM | 1267 | HA   | ARG | 79 | -9.106  | 1.973 | 2.042  | 1.00 | 0.00 |
| ATOM | 1268 | CB   | ARG | 79 | -10.690 | 3.353 | 2.437  | 1.00 | 0.00 |
| ATOM | 1269 | HB2  | ARG | 79 | -10.362 | 3.763 | 3.392  | 1.00 | 0.00 |
| ATOM | 1270 | HB3  | ARG | 79 | -11.175 | 4.136 | 1.853  | 1.00 | 0.00 |
| ATOM | 1271 | CG   | ARG | 79 | -11.665 | 2.234 | 2.681  | 1.00 | 0.00 |
| ATOM | 1272 | HG2  | ARG | 79 | -12.104 | 1.917 | 1.735  | 1.00 | 0.00 |
| ATOM | 1273 | HG3  | ARG | 79 | -11.150 | 1.392 | 3.142  | 1.00 | 0.00 |
| ATOM | 1274 | CD   | ARG | 79 | -12.779 | 2.732 | 3.623  | 1.00 | 0.00 |
| ATOM | 1275 | HD2  | ARG | 79 | -13.491 | 3.339 | 3.063  | 1.00 | 0.00 |
| ATOM | 1276 | HD3  | ARG | 79 | -13.297 | 1.880 | 4.063  | 1.00 | 0.00 |
| ATOM | 1277 | NE   | ARG | 79 | -12.208 | 3.555 | 4.713  | 1.00 | 0.00 |
| ATOM | 1278 | HE   | ARG | 79 | -11.352 | 3.195 | 5.110  | 1.00 | 0.00 |
| ATOM | 1279 | CZ   | ARG | 79 | -12.710 | 4.700 | 5.204  | 1.00 | 0.00 |
| ATOM | 1280 | NH1  | ARG | 79 | -13.850 | 5.226 | 4.741  | 1.00 | 0.00 |

|      |      |      |     |    |         |       |        |      |      |
|------|------|------|-----|----|---------|-------|--------|------|------|
| ATOM | 1281 | HH11 | ARG | 79 | -14.356 | 4.758 | 4.002  | 1.00 | 0.00 |
| ATOM | 1282 | HH12 | ARG | 79 | -14.200 | 6.089 | 5.132  | 1.00 | 0.00 |
| ATOM | 1283 | NH2  | ARG | 79 | -12.058 | 5.337 | 6.183  | 1.00 | 0.00 |
| ATOM | 1284 | HH21 | ARG | 79 | -11.197 | 4.954 | 6.544  | 1.00 | 0.00 |
| ATOM | 1285 | HH22 | ARG | 79 | -12.431 | 6.199 | 6.556  | 1.00 | 0.00 |
| ATOM | 1286 | C    | ARG | 79 | -9.797  | 2.730 | 0.205  | 1.00 | 0.00 |
| ATOM | 1287 | O    | ARG | 79 | -9.953  | 1.646 | -0.230 | 1.00 | 0.00 |
| ATOM | 1288 | N    | ALA | 80 | -9.775  | 3.774 | -0.611 | 1.00 | 0.00 |
| ATOM | 1289 | H    | ALA | 80 | -9.638  | 4.726 | -0.304 | 1.00 | 0.00 |
| ATOM | 1290 | CA   | ALA | 80 | -10.018 | 3.535 | -2.022 | 1.00 | 0.00 |
| ATOM | 1291 | HA   | ALA | 80 | -10.907 | 2.908 | -2.098 | 1.00 | 0.00 |
| ATOM | 1292 | CB   | ALA | 80 | -10.284 | 4.848 | -2.753 | 1.00 | 0.00 |
| ATOM | 1293 | HB1  | ALA | 80 | -9.400  | 5.483 | -2.694 | 1.00 | 0.00 |
| ATOM | 1294 | HB2  | ALA | 80 | -10.514 | 4.643 | -3.799 | 1.00 | 0.00 |
| ATOM | 1295 | HB3  | ALA | 80 | -11.129 | 5.358 | -2.290 | 1.00 | 0.00 |
| ATOM | 1296 | C    | ALA | 80 | -8.880  | 2.818 | -2.701 | 1.00 | 0.00 |
| ATOM | 1297 | O    | ALA | 80 | -9.157  | 1.995 | -3.610 | 1.00 | 0.00 |
| ATOM | 1298 | N    | CYX | 81 | -7.635  | 3.023 | -2.304 | 1.00 | 0.00 |
| ATOM | 1299 | H    | CYX | 81 | -7.443  | 3.701 | -1.580 | 1.00 | 0.00 |
| ATOM | 1300 | CA   | CYX | 81 | -6.521  | 2.298 | -2.879 | 1.00 | 0.00 |
| ATOM | 1301 | HA   | CYX | 81 | -6.593  | 2.386 | -3.963 | 1.00 | 0.00 |
| ATOM | 1302 | CB   | CYX | 81 | -5.186  | 2.777 | -2.453 | 1.00 | 0.00 |

|      |      |      |     |    |        |        |        |      |      |
|------|------|------|-----|----|--------|--------|--------|------|------|
| ATOM | 1303 | HB2  | CYX | 81 | -5.078 | 2.643  | -1.377 | 1.00 | 0.00 |
| ATOM | 1304 | HB3  | CYX | 81 | -4.414 | 2.208  | -2.970 | 1.00 | 0.00 |
| ATOM | 1305 | SG   | CYX | 81 | -5.042 | 4.606  | -2.871 | 1.00 | 0.00 |
| ATOM | 1306 | C    | CYX | 81 | -6.613 | 0.819  | -2.474 | 1.00 | 0.00 |
| ATOM | 1307 | O    | CYX | 81 | -6.311 | -0.065 | -3.200 | 1.00 | 0.00 |
| ATOM | 1308 | N    | GLN | 82 | -7.101 | 0.620  | -1.229 | 1.00 | 0.00 |
| ATOM | 1309 | H    | GLN | 82 | -7.318 | 1.362  | -0.579 | 1.00 | 0.00 |
| ATOM | 1310 | CA   | GLN | 82 | -7.288 | -0.767 | -0.790 | 1.00 | 0.00 |
| ATOM | 1311 | HA   | GLN | 82 | -6.335 | -1.292 | -0.851 | 1.00 | 0.00 |
| ATOM | 1312 | CB   | GLN | 82 | -7.798 | -0.844 | 0.653  | 1.00 | 0.00 |
| ATOM | 1313 | HB2  | GLN | 82 | -8.718 | -0.260 | 0.683  | 1.00 | 0.00 |
| ATOM | 1314 | HB3  | GLN | 82 | -8.028 | -1.893 | 0.840  | 1.00 | 0.00 |
| ATOM | 1315 | CG   | GLN | 82 | -6.856 | -0.345 | 1.702  | 1.00 | 0.00 |
| ATOM | 1316 | HG2  | GLN | 82 | -5.936 | -0.928 | 1.687  | 1.00 | 0.00 |
| ATOM | 1317 | HG3  | GLN | 82 | -6.620 | 0.710  | 1.557  | 1.00 | 0.00 |
| ATOM | 1318 | CD   | GLN | 82 | -7.517 | -0.513 | 3.064  | 1.00 | 0.00 |
| ATOM | 1319 | OE1  | GLN | 82 | -8.129 | -1.540 | 3.312  | 1.00 | 0.00 |
| ATOM | 1320 | NE2  | GLN | 82 | -7.410 | 0.485  | 3.926  | 1.00 | 0.00 |
| ATOM | 1321 | HE21 | GLN | 82 | -7.836 | 0.408  | 4.838  | 1.00 | 0.00 |
| ATOM | 1322 | HE22 | GLN | 82 | -6.903 | 1.320  | 3.667  | 1.00 | 0.00 |
| ATOM | 1323 | C    | GLN | 82 | -8.258 | -1.458 | -1.703 | 1.00 | 0.00 |
| ATOM | 1324 | O    | GLN | 82 | -7.962 | -2.597 | -2.073 | 1.00 | 0.00 |

|      |      |      |     |    |         |        |        |      |      |
|------|------|------|-----|----|---------|--------|--------|------|------|
| ATOM | 1325 | N    | ARG | 83 | -9.327  | -0.798 | -2.110 | 1.00 | 0.00 |
| ATOM | 1326 | H    | ARG | 83 | -9.502  | 0.085  | -1.651 | 1.00 | 0.00 |
| ATOM | 1327 | CA   | ARG | 83 | -10.307 | -1.287 | -3.043 | 1.00 | 0.00 |
| ATOM | 1328 | HA   | ARG | 83 | -10.646 | -2.270 | -2.718 | 1.00 | 0.00 |
| ATOM | 1329 | CB   | ARG | 83 | -11.498 | -0.379 | -3.143 | 1.00 | 0.00 |
| ATOM | 1330 | HB2  | ARG | 83 | -11.060 | 0.599  | -3.346 | 1.00 | 0.00 |
| ATOM | 1331 | HB3  | ARG | 83 | -12.019 | -0.734 | -4.033 | 1.00 | 0.00 |
| ATOM | 1332 | CG   | ARG | 83 | -12.487 | -0.263 | -1.988 | 1.00 | 0.00 |
| ATOM | 1333 | HG2  | ARG | 83 | -12.829 | -1.263 | -1.722 | 1.00 | 0.00 |
| ATOM | 1334 | HG3  | ARG | 83 | -11.975 | 0.185  | -1.136 | 1.00 | 0.00 |
| ATOM | 1335 | CD   | ARG | 83 | -13.699 | 0.608  | -2.374 | 1.00 | 0.00 |
| ATOM | 1336 | HD2  | ARG | 83 | -13.442 | 1.228  | -3.233 | 1.00 | 0.00 |
| ATOM | 1337 | HD3  | ARG | 83 | -14.542 | -0.034 | -2.630 | 1.00 | 0.00 |
| ATOM | 1338 | NE   | ARG | 83 | -14.096 | 1.487  | -1.259 | 1.00 | 0.00 |
| ATOM | 1339 | HE   | ARG | 83 | -13.903 | 2.472  | -1.376 | 1.00 | 0.00 |
| ATOM | 1340 | CZ   | ARG | 83 | -14.695 | 1.083  | -0.131 | 1.00 | 0.00 |
| ATOM | 1341 | NH1  | ARG | 83 | -14.992 | -0.202 | 0.074  | 1.00 | 0.00 |
| ATOM | 1342 | HH11 | ARG | 83 | -14.764 | -0.888 | -0.631 | 1.00 | 0.00 |
| ATOM | 1343 | HH12 | ARG | 83 | -15.444 | -0.482 | 0.933  | 1.00 | 0.00 |
| ATOM | 1344 | NH2  | ARG | 83 | -14.993 | 1.973  | 0.820  | 1.00 | 0.00 |
| ATOM | 1345 | HH21 | ARG | 83 | -14.766 | 2.948  | 0.684  | 1.00 | 0.00 |
| ATOM | 1346 | HH22 | ARG | 83 | -15.445 | 1.667  | 1.670  | 1.00 | 0.00 |

|      |      |      |     |    |        |        |        |      |      |
|------|------|------|-----|----|--------|--------|--------|------|------|
| ATOM | 1347 | C    | ARG | 83 | -9.695 | -1.575 | -4.447 | 1.00 | 0.00 |
| ATOM | 1348 | O    | ARG | 83 | -9.886 | -2.648 | -5.024 | 1.00 | 0.00 |
| ATOM | 1349 | N    | VAL | 84 | -8.858 | -0.650 | -4.902 | 1.00 | 0.00 |
| ATOM | 1350 | H    | VAL | 84 | -8.822 | 0.264  | -4.473 | 1.00 | 0.00 |
| ATOM | 1351 | CA   | VAL | 84 | -8.111 | -0.865 | -6.128 | 1.00 | 0.00 |
| ATOM | 1352 | HA   | VAL | 84 | -8.786 | -1.132 | -6.942 | 1.00 | 0.00 |
| ATOM | 1353 | CB   | VAL | 84 | -7.313 | 0.382  | -6.541 | 1.00 | 0.00 |
| ATOM | 1354 | HB   | VAL | 84 | -6.707 | 0.682  | -5.687 | 1.00 | 0.00 |
| ATOM | 1355 | CG1  | VAL | 84 | -6.401 | 0.147  | -7.761 | 1.00 | 0.00 |
| ATOM | 1356 | HG11 | VAL | 84 | -7.007 | -0.152 | -8.616 | 1.00 | 0.00 |
| ATOM | 1357 | HG12 | VAL | 84 | -5.867 | 1.067  | -7.999 | 1.00 | 0.00 |
| ATOM | 1358 | HG13 | VAL | 84 | -5.683 | -0.640 | -7.532 | 1.00 | 0.00 |
| ATOM | 1359 | CG2  | VAL | 84 | -8.328 | 1.477  | -6.846 | 1.00 | 0.00 |
| ATOM | 1360 | HG21 | VAL | 84 | -8.925 | 1.678  | -5.956 | 1.00 | 0.00 |
| ATOM | 1361 | HG22 | VAL | 84 | -7.805 | 2.386  | -7.145 | 1.00 | 0.00 |
| ATOM | 1362 | HG23 | VAL | 84 | -8.982 | 1.152  | -7.656 | 1.00 | 0.00 |
| ATOM | 1363 | C    | VAL | 84 | -7.271 | -2.102 | -6.063 | 1.00 | 0.00 |
| ATOM | 1364 | O    | VAL | 84 | -7.151 | -2.913 | -7.011 | 1.00 | 0.00 |
| ATOM | 1365 | N    | ILE | 85 | -6.486 | -2.230 | -4.995 | 1.00 | 0.00 |
| ATOM | 1366 | H    | ILE | 85 | -6.571 | -1.575 | -4.230 | 1.00 | 0.00 |
| ATOM | 1367 | CA   | ILE | 85 | -5.533 | -3.305 | -4.873 | 1.00 | 0.00 |
| ATOM | 1368 | HA   | ILE | 85 | -4.826 | -3.338 | -5.702 | 1.00 | 0.00 |



|      |      |      |     |    |         |        |        |      |      |
|------|------|------|-----|----|---------|--------|--------|------|------|
| ATOM | 1369 | CB   | ILE | 85 | -4.762  | -3.141 | -3.546 | 1.00 | 0.00 |
| ATOM | 1370 | HB   | ILE | 85 | -5.467  | -2.828 | -2.776 | 1.00 | 0.00 |
| ATOM | 1371 | CG2  | ILE | 85 | -4.092  | -4.432 | -3.123 | 1.00 | 0.00 |
| ATOM | 1372 | HG21 | ILE | 85 | -3.387  | -4.745 | -3.893 | 1.00 | 0.00 |
| ATOM | 1373 | HG22 | ILE | 85 | -3.560  | -4.275 | -2.185 | 1.00 | 0.00 |
| ATOM | 1374 | HG23 | ILE | 85 | -4.847  | -5.206 | -2.987 | 1.00 | 0.00 |
| ATOM | 1375 | CG1  | ILE | 85 | -3.763  | -2.047 | -3.645 | 1.00 | 0.00 |
| ATOM | 1376 | HG12 | ILE | 85 | -2.859  | -2.463 | -4.089 | 1.00 | 0.00 |
| ATOM | 1377 | HG13 | ILE | 85 | -4.173  | -1.282 | -4.305 | 1.00 | 0.00 |
| ATOM | 1378 | CD1  | ILE | 85 | -3.432  | -1.435 | -2.317 | 1.00 | 0.00 |
| ATOM | 1379 | HD11 | ILE | 85 | -3.022  | -2.199 | -1.657 | 1.00 | 0.00 |
| ATOM | 1380 | HD12 | ILE | 85 | -2.697  | -0.642 | -2.455 | 1.00 | 0.00 |
| ATOM | 1381 | HD13 | ILE | 85 | -4.336  | -1.018 | -1.873 | 1.00 | 0.00 |
| ATOM | 1382 | C    | ILE | 85 | -6.387  | -4.621 | -4.844 | 1.00 | 0.00 |
| ATOM | 1383 | O    | ILE | 85 | -5.974  | -5.571 | -5.495 | 1.00 | 0.00 |
| ATOM | 1384 | N    | GLN | 86 | -7.488  | -4.656 | -4.148 | 1.00 | 0.00 |
| ATOM | 1385 | H    | GLN | 86 | -7.762  | -3.869 | -3.577 | 1.00 | 0.00 |
| ATOM | 1386 | CA   | GLN | 86 | -8.346  | -5.891 | -4.119 | 1.00 | 0.00 |
| ATOM | 1387 | HA   | GLN | 86 | -7.748  | -6.763 | -3.856 | 1.00 | 0.00 |
| ATOM | 1388 | CB   | GLN | 86 | -9.418  | -5.723 | -3.096 | 1.00 | 0.00 |
| ATOM | 1389 | HB2  | GLN | 86 | -9.895  | -4.754 | -3.249 | 1.00 | 0.00 |
| ATOM | 1390 | HB3  | GLN | 86 | -10.155 | -6.515 | -3.232 | 1.00 | 0.00 |

|      |      |      |     |    |         |        |         |      |      |
|------|------|------|-----|----|---------|--------|---------|------|------|
| ATOM | 1391 | CG   | GLN | 86 | -8.846  | -5.794 | -1.670  | 1.00 | 0.00 |
| ATOM | 1392 | HG2  | GLN | 86 | -8.116  | -6.584 | -1.498  | 1.00 | 0.00 |
| ATOM | 1393 | HG3  | GLN | 86 | -8.380  | -4.824 | -1.497  | 1.00 | 0.00 |
| ATOM | 1394 | CD   | GLN | 86 | -9.992  | -5.966 | -0.681  | 1.00 | 0.00 |
| ATOM | 1395 | OE1  | GLN | 86 | -10.536 | -4.986 | -0.111  | 1.00 | 0.00 |
| ATOM | 1396 | NE2  | GLN | 86 | -10.452 | -7.202 | -0.565  | 1.00 | 0.00 |
| ATOM | 1397 | HE21 | GLN | 86 | -11.212 | -7.397 | 0.071   | 1.00 | 0.00 |
| ATOM | 1398 | HE22 | GLN | 86 | -10.041 | -7.944 | -1.113  | 1.00 | 0.00 |
| ATOM | 1399 | C    | GLN | 86 | -8.941  | -6.177 | -5.514  | 1.00 | 0.00 |
| ATOM | 1400 | O    | GLN | 86 | -8.926  | -7.294 | -5.961  | 1.00 | 0.00 |
| ATOM | 1401 | N    | ARG | 87 | -9.384  | -5.122 | -6.177  | 1.00 | 0.00 |
| ATOM | 1402 | H    | ARG | 87 | -9.303  | -4.206 | -5.758  | 1.00 | 0.00 |
| ATOM | 1403 | CA   | ARG | 87 | -10.007 | -5.229 | -7.555  | 1.00 | 0.00 |
| ATOM | 1404 | HA   | ARG | 87 | -10.973 | -5.733 | -7.516  | 1.00 | 0.00 |
| ATOM | 1405 | CB   | ARG | 87 | -10.218 | -3.819 | -8.066  | 1.00 | 0.00 |
| ATOM | 1406 | HB2  | ARG | 87 | -11.048 | -3.373 | -7.518  | 1.00 | 0.00 |
| ATOM | 1407 | HB3  | ARG | 87 | -9.311  | -3.244 | -7.881  | 1.00 | 0.00 |
| ATOM | 1408 | CG   | ARG | 87 | -10.532 | -3.807 | -9.563  | 1.00 | 0.00 |
| ATOM | 1409 | HG2  | ARG | 87 | -9.729  | -4.287 | -10.122 | 1.00 | 0.00 |
| ATOM | 1410 | HG3  | ARG | 87 | -11.470 | -4.327 | -9.757  | 1.00 | 0.00 |
| ATOM | 1411 | CD   | ARG | 87 | -10.656 | -2.379 | -9.996  | 1.00 | 0.00 |
| ATOM | 1412 | HD2  | ARG | 87 | -9.840  | -1.788 | -9.580  | 1.00 | 0.00 |

|      |      |      |     |    |         |        |         |      |      |
|------|------|------|-----|----|---------|--------|---------|------|------|
| ATOM | 1413 | HD3  | ARG | 87 | -10.634 | -2.313 | -11.084 | 1.00 | 0.00 |
| ATOM | 1414 | NE   | ARG | 87 | -11.911 | -1.832 | -9.524  | 1.00 | 0.00 |
| ATOM | 1415 | HE   | ARG | 87 | -12.596 | -2.461 | -9.131  | 1.00 | 0.00 |
| ATOM | 1416 | CZ   | ARG | 87 | -12.174 | -0.509 | -9.517  | 1.00 | 0.00 |
| ATOM | 1417 | NH1  | ARG | 87 | -11.294 | 0.371  | -9.976  | 1.00 | 0.00 |
| ATOM | 1418 | HH11 | ARG | 87 | -10.408 | 0.052  | -10.340 | 1.00 | 0.00 |
| ATOM | 1419 | HH12 | ARG | 87 | -11.515 | 1.357  | -9.960  | 1.00 | 0.00 |
| ATOM | 1420 | NH2  | ARG | 87 | -13.405 | -0.081 | -9.100  | 1.00 | 0.00 |
| ATOM | 1421 | HH21 | ARG | 87 | -14.097 | -0.754 | -8.805  | 1.00 | 0.00 |
| ATOM | 1422 | HH22 | ARG | 87 | -13.616 | 0.907  | -9.090  | 1.00 | 0.00 |
| ATOM | 1423 | C    | ARG | 87 | -9.093  | -5.980 | -8.496  | 1.00 | 0.00 |
| ATOM | 1424 | O    | ARG | 87 | -9.531  | -6.873 | -9.185  | 1.00 | 0.00 |
| ATOM | 1425 | N    | TRP | 88 | -7.789  | -5.687 | -8.512  | 1.00 | 0.00 |
| ATOM | 1426 | H    | TRP | 88 | -7.488  | -4.944 | -7.898  | 1.00 | 0.00 |
| ATOM | 1427 | CA   | TRP | 88 | -6.811  | -6.269 | -9.427  | 1.00 | 0.00 |
| ATOM | 1428 | HA   | TRP | 88 | -7.311  | -6.660 | -10.313 | 1.00 | 0.00 |
| ATOM | 1429 | CB   | TRP | 88 | -5.829  | -5.214 | -9.856  | 1.00 | 0.00 |
| ATOM | 1430 | HB2  | TRP | 88 | -5.544  | -4.675 | -8.953  | 1.00 | 0.00 |
| ATOM | 1431 | HB3  | TRP | 88 | -4.932  | -5.541 | -10.382 | 1.00 | 0.00 |
| ATOM | 1432 | CG   | TRP | 88 | -6.518  | -4.214 | -10.757 | 1.00 | 0.00 |
| ATOM | 1433 | CD1  | TRP | 88 | -7.032  | -2.984 | -10.437 | 1.00 | 0.00 |
| ATOM | 1434 | HD1  | TRP | 88 | -6.872  | -2.625 | -9.421  | 1.00 | 0.00 |

|      |      |         |    |        |        |         |      |      |
|------|------|---------|----|--------|--------|---------|------|------|
| ATOM | 1435 | NE1 TRP | 88 | -7.653 | -2.463 | -11.501 | 1.00 | 0.00 |
| ATOM | 1436 | HE1 TRP | 88 | -8.038 | -1.530 | -11.549 | 1.00 | 0.00 |
| ATOM | 1437 | CE2 TRP | 88 | -7.604 | -3.364 | -12.544 | 1.00 | 0.00 |
| ATOM | 1438 | CZ2 TRP | 88 | -8.083 | -3.269 | -13.858 | 1.00 | 0.00 |
| ATOM | 1439 | HZ2 TRP | 88 | -8.583 | -2.356 | -14.184 | 1.00 | 0.00 |
| ATOM | 1440 | CH2 TRP | 88 | -7.889 | -4.329 | -14.637 | 1.00 | 0.00 |
| ATOM | 1441 | HH2 TRP | 88 | -8.331 | -4.319 | -15.634 | 1.00 | 0.00 |
| ATOM | 1442 | CZ3 TRP | 88 | -7.158 | -5.432 | -14.239 | 1.00 | 0.00 |
| ATOM | 1443 | HZ3 TRP | 88 | -6.961 | -6.261 | -14.918 | 1.00 | 0.00 |
| ATOM | 1444 | CE3 TRP | 88 | -6.665 | -5.509 | -12.985 | 1.00 | 0.00 |
| ATOM | 1445 | HE3 TRP | 88 | -6.136 | -6.416 | -12.692 | 1.00 | 0.00 |
| ATOM | 1446 | CD2 TRP | 88 | -6.881 | -4.452 | -12.122 | 1.00 | 0.00 |
| ATOM | 1447 | C TRP   | 88 | -6.099 | -7.482 | -8.922  | 1.00 | 0.00 |
| ATOM | 1448 | O TRP   | 88 | -5.262 | -7.985 | -9.620  | 1.00 | 0.00 |
| ATOM | 1449 | N SER   | 89 | -6.585 | -7.994 | -7.810  | 1.00 | 0.00 |
| ATOM | 1450 | H SER   | 89 | -7.359 | -7.505 | -7.383  | 1.00 | 0.00 |
| ATOM | 1451 | CA SER  | 89 | -6.029 | -9.146 | -7.116  | 1.00 | 0.00 |
| ATOM | 1452 | HA SER  | 89 | -5.180 | -9.558 | -7.661  | 1.00 | 0.00 |
| ATOM | 1453 | CB SER  | 89 | -5.540 | -8.675 | -5.714  | 1.00 | 0.00 |
| ATOM | 1454 | HB2 SER | 89 | -6.339 | -8.160 | -5.181  | 1.00 | 0.00 |
| ATOM | 1455 | HB3 SER | 89 | -5.196 | -9.522 | -5.122  | 1.00 | 0.00 |
| ATOM | 1456 | OG SER  | 89 | -4.452 | -7.771 | -5.930  | 1.00 | 0.00 |



|      |      |     |     |    |        |         |        |      |      |
|------|------|-----|-----|----|--------|---------|--------|------|------|
| ATOM | 1478 | S1  | LIG | 91 | 16.003 | -6.600  | -8.474 | 1.00 | 0.00 |
| ATOM | 1479 | O1  | LIG | 91 | 16.174 | -7.974  | -7.630 | 1.00 | 0.00 |
| ATOM | 1480 | O2  | LIG | 91 | 17.355 | -6.735  | -9.346 | 1.00 | 0.00 |
| ATOM | 1481 | H26 | LIG | 91 | 18.124 | -6.531  | -8.792 | 1.00 | 0.00 |
| ATOM | 1482 | O3  | LIG | 91 | 14.906 | -6.717  | -9.402 | 1.00 | 0.00 |
| ATOM | 1483 | O4  | LIG | 91 | 16.116 | -5.473  | -7.571 | 1.00 | 0.00 |
| ATOM | 1484 | C1  | LIG | 91 | 13.951 | -13.261 | -2.770 | 1.00 | 0.00 |
| ATOM | 1485 | H1  | LIG | 91 | 14.148 | -14.029 | -3.528 | 1.00 | 0.00 |
| ATOM | 1486 | H2  | LIG | 91 | 14.888 | -13.138 | -2.211 | 1.00 | 0.00 |
| ATOM | 1487 | C2  | LIG | 91 | 12.858 | -13.759 | -1.818 | 1.00 | 0.00 |
| ATOM | 1488 | H3  | LIG | 91 | 11.921 | -13.882 | -2.376 | 1.00 | 0.00 |
| ATOM | 1489 | H4  | LIG | 91 | 12.660 | -12.990 | -1.059 | 1.00 | 0.00 |
| ATOM | 1490 | C3  | LIG | 91 | 13.601 | -11.941 | -3.466 | 1.00 | 0.00 |
| ATOM | 1491 | H5  | LIG | 91 | 13.406 | -11.172 | -2.707 | 1.00 | 0.00 |
| ATOM | 1492 | H6  | LIG | 91 | 12.663 | -12.064 | -4.023 | 1.00 | 0.00 |
| ATOM | 1493 | C4  | LIG | 91 | 13.206 | -15.078 | -1.119 | 1.00 | 0.00 |
| ATOM | 1494 | H7  | LIG | 91 | 14.143 | -14.955 | -0.560 | 1.00 | 0.00 |
| ATOM | 1495 | H8  | LIG | 91 | 13.405 | -15.847 | -1.877 | 1.00 | 0.00 |
| ATOM | 1496 | C5  | LIG | 91 | 14.693 | -11.444 | -4.420 | 1.00 | 0.00 |
| ATOM | 1497 | H9  | LIG | 91 | 15.632 | -11.323 | -3.866 | 1.00 | 0.00 |
| ATOM | 1498 | H10 | LIG | 91 | 14.886 | -12.210 | -5.182 | 1.00 | 0.00 |
| ATOM | 1499 | C6  | LIG | 91 | 12.113 | -15.578 | -0.168 | 1.00 | 0.00 |

|      |      |     |     |    |        |         |        |      |      |
|------|------|-----|-----|----|--------|---------|--------|------|------|
| ATOM | 1500 | H11 | LIG | 91 | 11.176 | -15.700 | -0.727 | 1.00 | 0.00 |
| ATOM | 1501 | H12 | LIG | 91 | 11.914 | -14.809 | 0.591  | 1.00 | 0.00 |
| ATOM | 1502 | C7  | LIG | 91 | 14.341 | -10.123 | -5.113 | 1.00 | 0.00 |
| ATOM | 1503 | H13 | LIG | 91 | 13.401 | -10.244 | -5.665 | 1.00 | 0.00 |
| ATOM | 1504 | H14 | LIG | 91 | 14.153 | -9.355  | -4.351 | 1.00 | 0.00 |
| ATOM | 1505 | C8  | LIG | 91 | 12.460 | -16.897 | 0.531  | 1.00 | 0.00 |
| ATOM | 1506 | H15 | LIG | 91 | 12.658 | -17.667 | -0.226 | 1.00 | 0.00 |
| ATOM | 1507 | H16 | LIG | 91 | 13.397 | -16.775 | 1.090  | 1.00 | 0.00 |
| ATOM | 1508 | C9  | LIG | 91 | 15.439 | -9.639  | -6.069 | 1.00 | 0.00 |
| ATOM | 1509 | H17 | LIG | 91 | 15.618 | -10.390 | -6.846 | 1.00 | 0.00 |
| ATOM | 1510 | H18 | LIG | 91 | 16.380 | -9.508  | -5.525 | 1.00 | 0.00 |
| ATOM | 1511 | C10 | LIG | 91 | 11.367 | -17.397 | 1.483  | 1.00 | 0.00 |
| ATOM | 1512 | H19 | LIG | 91 | 10.432 | -17.518 | 0.924  | 1.00 | 0.00 |
| ATOM | 1513 | H20 | LIG | 91 | 11.171 | -16.628 | 2.240  | 1.00 | 0.00 |
| ATOM | 1514 | C11 | LIG | 91 | 15.068 | -8.327  | -6.734 | 1.00 | 0.00 |
| ATOM | 1515 | H21 | LIG | 91 | 14.159 | -8.420  | -7.334 | 1.00 | 0.00 |
| ATOM | 1516 | H22 | LIG | 91 | 14.944 | -7.523  | -6.004 | 1.00 | 0.00 |
| ATOM | 1517 | C12 | LIG | 91 | 11.724 | -18.716 | 2.175  | 1.00 | 0.00 |
| ATOM | 1518 | H23 | LIG | 91 | 12.638 | -18.616 | 2.769  | 1.00 | 0.00 |
| ATOM | 1519 | H24 | LIG | 91 | 10.926 | -19.043 | 2.847  | 1.00 | 0.00 |
| ATOM | 1520 | H25 | LIG | 91 | 11.891 | -19.513 | 1.444  | 1.00 | 0.00 |

TER

|      |      |     |     |    |         |        |        |      |      |
|------|------|-----|-----|----|---------|--------|--------|------|------|
| ATOM | 1521 | S1  | LIG | 92 | -19.614 | 20.405 | 3.602  | 1.00 | 0.00 |
| ATOM | 1522 | O1  | LIG | 92 | -18.256 | 21.244 | 3.317  | 1.00 | 0.00 |
| ATOM | 1523 | O2  | LIG | 92 | -20.434 | 21.596 | 4.322  | 1.00 | 0.00 |
| ATOM | 1524 | H26 | LIG | 92 | -20.093 | 21.732 | 5.219  | 1.00 | 0.00 |
| ATOM | 1525 | O3  | LIG | 92 | -20.300 | 20.128 | 2.364  | 1.00 | 0.00 |
| ATOM | 1526 | O4  | LIG | 92 | -19.331 | 19.359 | 4.564  | 1.00 | 0.00 |
| ATOM | 1527 | C1  | LIG | 92 | -11.373 | 22.222 | 0.458  | 1.00 | 0.00 |
| ATOM | 1528 | H1  | LIG | 92 | -11.714 | 23.146 | -0.026 | 1.00 | 0.00 |
| ATOM | 1529 | H2  | LIG | 92 | -11.005 | 22.517 | 1.449  | 1.00 | 0.00 |
| ATOM | 1530 | C2  | LIG | 92 | -10.216 | 21.625 | -0.352 | 1.00 | 0.00 |
| ATOM | 1531 | H3  | LIG | 92 | -10.583 | 21.330 | -1.343 | 1.00 | 0.00 |
| ATOM | 1532 | H4  | LIG | 92 | -9.875  | 20.700 | 0.132  | 1.00 | 0.00 |
| ATOM | 1533 | C3  | LIG | 92 | -12.561 | 21.269 | 0.622  | 1.00 | 0.00 |
| ATOM | 1534 | H5  | LIG | 92 | -12.220 | 20.345 | 1.109  | 1.00 | 0.00 |
| ATOM | 1535 | H6  | LIG | 92 | -12.927 | 20.972 | -0.370 | 1.00 | 0.00 |
| ATOM | 1536 | C4  | LIG | 92 | -9.026  | 22.576 | -0.517 | 1.00 | 0.00 |
| ATOM | 1537 | H7  | LIG | 92 | -8.657  | 22.870 | 0.475  | 1.00 | 0.00 |
| ATOM | 1538 | H8  | LIG | 92 | -9.366  | 23.501 | -0.999 | 1.00 | 0.00 |
| ATOM | 1539 | C5  | LIG | 92 | -13.719 | 21.866 | 1.429  | 1.00 | 0.00 |
| ATOM | 1540 | H9  | LIG | 92 | -13.354 | 22.165 | 2.420  | 1.00 | 0.00 |
| ATOM | 1541 | H10 | LIG | 92 | -14.064 | 22.787 | 0.942  | 1.00 | 0.00 |
| ATOM | 1542 | C6  | LIG | 92 | -7.869  | 21.980 | -1.327 | 1.00 | 0.00 |



|      |      |     |     |    |         |        |        |      |      |
|------|------|-----|-----|----|---------|--------|--------|------|------|
| ATOM | 1543 | H11 | LIG | 92 | -8.237  | 21.686 | -2.318 | 1.00 | 0.00 |
| ATOM | 1544 | H12 | LIG | 92 | -7.528  | 21.055 | -0.844 | 1.00 | 0.00 |
| ATOM | 1545 | C7  | LIG | 92 | -14.904 | 20.909 | 1.594  | 1.00 | 0.00 |
| ATOM | 1546 | H13 | LIG | 92 | -15.267 | 20.609 | 0.602  | 1.00 | 0.00 |
| ATOM | 1547 | H14 | LIG | 92 | -14.561 | 19.991 | 2.086  | 1.00 | 0.00 |
| ATOM | 1548 | C8  | LIG | 92 | -6.679  | 22.931 | -1.492 | 1.00 | 0.00 |
| ATOM | 1549 | H15 | LIG | 92 | -7.018  | 23.857 | -1.976 | 1.00 | 0.00 |
| ATOM | 1550 | H16 | LIG | 92 | -6.311  | 23.226 | -0.501 | 1.00 | 0.00 |
| ATOM | 1551 | C9  | LIG | 92 | -16.059 | 21.521 | 2.398  | 1.00 | 0.00 |
| ATOM | 1552 | H17 | LIG | 92 | -16.423 | 22.427 | 1.903  | 1.00 | 0.00 |
| ATOM | 1553 | H18 | LIG | 92 | -15.708 | 21.817 | 3.392  | 1.00 | 0.00 |
| ATOM | 1554 | C10 | LIG | 92 | -5.521  | 22.336 | -2.302 | 1.00 | 0.00 |
| ATOM | 1555 | H19 | LIG | 92 | -5.890  | 22.041 | -3.292 | 1.00 | 0.00 |
| ATOM | 1556 | H20 | LIG | 92 | -5.181  | 21.412 | -1.818 | 1.00 | 0.00 |
| ATOM | 1557 | C11 | LIG | 92 | -17.214 | 20.551 | 2.552  | 1.00 | 0.00 |
| ATOM | 1558 | H21 | LIG | 92 | -17.634 | 20.264 | 1.585  | 1.00 | 0.00 |
| ATOM | 1559 | H22 | LIG | 92 | -16.920 | 19.654 | 3.104  | 1.00 | 0.00 |
| ATOM | 1560 | C12 | LIG | 92 | -4.338  | 23.294 | -2.462 | 1.00 | 0.00 |
| ATOM | 1561 | H23 | LIG | 92 | -3.926  | 23.580 | -1.489 | 1.00 | 0.00 |
| ATOM | 1562 | H24 | LIG | 92 | -3.530  | 22.839 | -3.042 | 1.00 | 0.00 |
| ATOM | 1563 | H25 | LIG | 92 | -4.639  | 24.212 | -2.976 | 1.00 | 0.00 |

TER

|      |      |     |     |    |        |         |        |      |      |
|------|------|-----|-----|----|--------|---------|--------|------|------|
| ATOM | 1564 | S1  | LIG | 93 | 19.172 | -9.663  | 11.518 | 1.00 | 0.00 |
| ATOM | 1565 | O1  | LIG | 93 | 19.340 | -8.204  | 12.206 | 1.00 | 0.00 |
| ATOM | 1566 | O2  | LIG | 93 | 20.497 | -9.601  | 10.597 | 1.00 | 0.00 |
| ATOM | 1567 | H26 | LIG | 93 | 20.345 | -9.009  | 9.845  | 1.00 | 0.00 |
| ATOM | 1568 | O3  | LIG | 93 | 19.399 | -10.703 | 12.490 | 1.00 | 0.00 |
| ATOM | 1569 | O4  | LIG | 93 | 17.993 | -9.655  | 10.675 | 1.00 | 0.00 |
| ATOM | 1570 | C1  | LIG | 93 | 17.490 | -2.724  | 17.008 | 1.00 | 0.00 |
| ATOM | 1571 | H1  | LIG | 93 | 18.524 | -2.710  | 17.376 | 1.00 | 0.00 |
| ATOM | 1572 | H2  | LIG | 93 | 17.454 | -2.010  | 16.176 | 1.00 | 0.00 |
| ATOM | 1573 | C2  | LIG | 93 | 16.550 | -2.249  | 18.122 | 1.00 | 0.00 |
| ATOM | 1574 | H3  | LIG | 93 | 16.586 | -2.963  | 18.954 | 1.00 | 0.00 |
| ATOM | 1575 | H4  | LIG | 93 | 15.515 | -2.264  | 17.754 | 1.00 | 0.00 |
| ATOM | 1576 | C3  | LIG | 93 | 17.160 | -4.127  | 16.485 | 1.00 | 0.00 |
| ATOM | 1577 | H5  | LIG | 93 | 16.126 | -4.141  | 16.115 | 1.00 | 0.00 |
| ATOM | 1578 | H6  | LIG | 93 | 17.194 | -4.840  | 17.319 | 1.00 | 0.00 |
| ATOM | 1579 | C4  | LIG | 93 | 16.878 | -0.846  | 18.646 | 1.00 | 0.00 |
| ATOM | 1580 | H7  | LIG | 93 | 16.841 | -0.131  | 17.813 | 1.00 | 0.00 |
| ATOM | 1581 | H8  | LIG | 93 | 17.912 | -0.830  | 19.012 | 1.00 | 0.00 |
| ATOM | 1582 | C5  | LIG | 93 | 18.102 | -4.604  | 15.374 | 1.00 | 0.00 |
| ATOM | 1583 | H9  | LIG | 93 | 18.071 | -3.889  | 14.541 | 1.00 | 0.00 |
| ATOM | 1584 | H10 | LIG | 93 | 19.134 | -4.594  | 15.745 | 1.00 | 0.00 |
| ATOM | 1585 | C6  | LIG | 93 | 15.938 | -0.371  | 19.760 | 1.00 | 0.00 |

|      |      |     |     |    |        |        |        |      |      |
|------|------|-----|-----|----|--------|--------|--------|------|------|
| ATOM | 1586 | H11 | LIG | 93 | 15.975 | -1.085 | 20.592 | 1.00 | 0.00 |
| ATOM | 1587 | H12 | LIG | 93 | 14.903 | -0.387 | 19.392 | 1.00 | 0.00 |
| ATOM | 1588 | C7  | LIG | 93 | 17.766 | -6.005 | 14.852 | 1.00 | 0.00 |
| ATOM | 1589 | H13 | LIG | 93 | 17.796 | -6.718 | 15.686 | 1.00 | 0.00 |
| ATOM | 1590 | H14 | LIG | 93 | 16.735 | -6.013 | 14.476 | 1.00 | 0.00 |
| ATOM | 1591 | C8  | LIG | 93 | 16.265 | 1.032  | 20.284 | 1.00 | 0.00 |
| ATOM | 1592 | H15 | LIG | 93 | 17.300 | 1.049  | 20.653 | 1.00 | 0.00 |
| ATOM | 1593 | H16 | LIG | 93 | 16.230 | 1.747  | 19.451 | 1.00 | 0.00 |
| ATOM | 1594 | C9  | LIG | 93 | 18.720 | -6.473 | 13.744 | 1.00 | 0.00 |
| ATOM | 1595 | H17 | LIG | 93 | 19.749 | -6.489 | 14.116 | 1.00 | 0.00 |
| ATOM | 1596 | H18 | LIG | 93 | 18.692 | -5.771 | 12.904 | 1.00 | 0.00 |
| ATOM | 1597 | C10 | LIG | 93 | 15.327 | 1.508  | 21.398 | 1.00 | 0.00 |
| ATOM | 1598 | H19 | LIG | 93 | 15.363 | 0.794  | 22.229 | 1.00 | 0.00 |
| ATOM | 1599 | H20 | LIG | 93 | 14.294 | 1.493  | 21.029 | 1.00 | 0.00 |
| ATOM | 1600 | C11 | LIG | 93 | 18.361 | -7.858 | 13.241 | 1.00 | 0.00 |
| ATOM | 1601 | H21 | LIG | 93 | 18.424 | -8.606 | 14.035 | 1.00 | 0.00 |
| ATOM | 1602 | H22 | LIG | 93 | 17.363 | -7.882 | 12.794 | 1.00 | 0.00 |
| ATOM | 1603 | C12 | LIG | 93 | 15.663 | 2.910  | 21.915 | 1.00 | 0.00 |
| ATOM | 1604 | H23 | LIG | 93 | 15.602 | 3.653  | 21.113 | 1.00 | 0.00 |
| ATOM | 1605 | H24 | LIG | 93 | 14.975 | 3.220  | 22.706 | 1.00 | 0.00 |
| ATOM | 1606 | H25 | LIG | 93 | 16.677 | 2.949  | 22.323 | 1.00 | 0.00 |

TER

|      |      |     |     |    |        |        |         |      |      |
|------|------|-----|-----|----|--------|--------|---------|------|------|
| ATOM | 1607 | S1  | LIG | 94 | 8.330  | 24.193 | -16.087 | 1.00 | 0.00 |
| ATOM | 1608 | O1  | LIG | 94 | 8.570  | 23.633 | -14.584 | 1.00 | 0.00 |
| ATOM | 1609 | O2  | LIG | 94 | 7.414  | 25.459 | -15.682 | 1.00 | 0.00 |
| ATOM | 1610 | H26 | LIG | 94 | 6.525  | 25.156 | -15.440 | 1.00 | 0.00 |
| ATOM | 1611 | O3  | LIG | 94 | 9.556  | 24.731 | -16.621 | 1.00 | 0.00 |
| ATOM | 1612 | O4  | LIG | 94 | 7.536  | 23.233 | -16.827 | 1.00 | 0.00 |
| ATOM | 1613 | C1  | LIG | 94 | 11.626 | 19.052 | -9.467  | 1.00 | 0.00 |
| ATOM | 1614 | H1  | LIG | 94 | 11.961 | 19.927 | -8.896  | 1.00 | 0.00 |
| ATOM | 1615 | H2  | LIG | 94 | 10.624 | 18.809 | -9.089  | 1.00 | 0.00 |
| ATOM | 1616 | C2  | LIG | 94 | 12.568 | 17.875 | -9.189  | 1.00 | 0.00 |
| ATOM | 1617 | H3  | LIG | 94 | 13.570 | 18.118 | -9.566  | 1.00 | 0.00 |
| ATOM | 1618 | H4  | LIG | 94 | 12.233 | 17.000 | -9.761  | 1.00 | 0.00 |
| ATOM | 1619 | C3  | LIG | 94 | 11.530 | 19.423 | -10.951 | 1.00 | 0.00 |
| ATOM | 1620 | H5  | LIG | 94 | 11.192 | 18.548 | -11.522 | 1.00 | 0.00 |
| ATOM | 1621 | H6  | LIG | 94 | 12.533 | 19.663 | -11.328 | 1.00 | 0.00 |
| ATOM | 1622 | C4  | LIG | 94 | 12.665 | 17.502 | -7.705  | 1.00 | 0.00 |
| ATOM | 1623 | H7  | LIG | 94 | 11.663 | 17.258 | -7.328  | 1.00 | 0.00 |
| ATOM | 1624 | H8  | LIG | 94 | 12.999 | 18.377 | -7.133  | 1.00 | 0.00 |
| ATOM | 1625 | C5  | LIG | 94 | 10.590 | 20.601 | -11.228 | 1.00 | 0.00 |
| ATOM | 1626 | H9  | LIG | 94 | 9.588  | 20.363 | -10.849 | 1.00 | 0.00 |
| ATOM | 1627 | H10 | LIG | 94 | 10.930 | 21.477 | -10.662 | 1.00 | 0.00 |
| ATOM | 1628 | C6  | LIG | 94 | 13.608 | 16.326 | -7.427  | 1.00 | 0.00 |

|      |      |     |     |    |        |        |         |      |      |
|------|------|-----|-----|----|--------|--------|---------|------|------|
| ATOM | 1629 | H11 | LIG | 94 | 14.609 | 16.569 | -7.805  | 1.00 | 0.00 |
| ATOM | 1630 | H12 | LIG | 94 | 13.273 | 15.450 | -7.999  | 1.00 | 0.00 |
| ATOM | 1631 | C7  | LIG | 94 | 10.495 | 20.967 | -12.714 | 1.00 | 0.00 |
| ATOM | 1632 | H13 | LIG | 94 | 11.498 | 21.203 | -13.092 | 1.00 | 0.00 |
| ATOM | 1633 | H14 | LIG | 94 | 10.151 | 20.092 | -13.279 | 1.00 | 0.00 |
| ATOM | 1634 | C8  | LIG | 94 | 13.705 | 15.952 | -5.944  | 1.00 | 0.00 |
| ATOM | 1635 | H15 | LIG | 94 | 14.040 | 16.827 | -5.371  | 1.00 | 0.00 |
| ATOM | 1636 | H16 | LIG | 94 | 12.703 | 15.710 | -5.566  | 1.00 | 0.00 |
| ATOM | 1637 | C9  | LIG | 94 | 9.556  | 22.151 | -12.978 | 1.00 | 0.00 |
| ATOM | 1638 | H17 | LIG | 94 | 9.904  | 23.036 | -12.434 | 1.00 | 0.00 |
| ATOM | 1639 | H18 | LIG | 94 | 8.551  | 21.922 | -12.609 | 1.00 | 0.00 |
| ATOM | 1640 | C10 | LIG | 94 | 14.648 | 14.776 | -5.664  | 1.00 | 0.00 |
| ATOM | 1641 | H19 | LIG | 94 | 15.648 | 15.020 | -6.043  | 1.00 | 0.00 |
| ATOM | 1642 | H20 | LIG | 94 | 14.312 | 13.902 | -6.236  | 1.00 | 0.00 |
| ATOM | 1643 | C11 | LIG | 94 | 9.475  | 22.487 | -14.454 | 1.00 | 0.00 |
| ATOM | 1644 | H21 | LIG | 94 | 10.449 | 22.773 | -14.858 | 1.00 | 0.00 |
| ATOM | 1645 | H22 | LIG | 94 | 9.066  | 21.657 | -15.038 | 1.00 | 0.00 |
| ATOM | 1646 | C12 | LIG | 94 | 14.738 | 14.412 | -4.180  | 1.00 | 0.00 |
| ATOM | 1647 | H23 | LIG | 94 | 13.757 | 14.131 | -3.782  | 1.00 | 0.00 |
| ATOM | 1648 | H24 | LIG | 94 | 15.416 | 13.570 | -4.015  | 1.00 | 0.00 |
| ATOM | 1649 | H25 | LIG | 94 | 15.105 | 15.255 | -3.587  | 1.00 | 0.00 |

TER

|      |      |     |     |    |         |         |         |      |      |
|------|------|-----|-----|----|---------|---------|---------|------|------|
| ATOM | 1650 | S1  | LIG | 95 | -15.826 | -24.283 | -8.701  | 1.00 | 0.00 |
| ATOM | 1651 | O1  | LIG | 95 | -15.205 | -23.152 | -9.682  | 1.00 | 0.00 |
| ATOM | 1652 | O2  | LIG | 95 | -14.461 | -24.628 | -7.909  | 1.00 | 0.00 |
| ATOM | 1653 | H26 | LIG | 95 | -13.879 | -25.156 | -8.476  | 1.00 | 0.00 |
| ATOM | 1654 | O3  | LIG | 95 | -16.714 | -23.678 | -7.739  | 1.00 | 0.00 |
| ATOM | 1655 | O4  | LIG | 95 | -16.231 | -25.427 | -9.494  | 1.00 | 0.00 |
| ATOM | 1656 | C1  | LIG | 95 | -15.594 | -17.782 | -14.929 | 1.00 | 0.00 |
| ATOM | 1657 | H1  | LIG | 95 | -15.054 | -17.101 | -14.260 | 1.00 | 0.00 |
| ATOM | 1658 | H2  | LIG | 95 | -14.826 | -18.303 | -15.516 | 1.00 | 0.00 |
| ATOM | 1659 | C2  | LIG | 95 | -16.482 | -16.965 | -15.874 | 1.00 | 0.00 |
| ATOM | 1660 | H3  | LIG | 95 | -17.250 | -16.444 | -15.288 | 1.00 | 0.00 |
| ATOM | 1661 | H4  | LIG | 95 | -17.023 | -17.647 | -16.544 | 1.00 | 0.00 |
| ATOM | 1662 | C3  | LIG | 95 | -16.370 | -18.805 | -14.092 | 1.00 | 0.00 |
| ATOM | 1663 | H5  | LIG | 95 | -16.908 | -19.488 | -14.762 | 1.00 | 0.00 |
| ATOM | 1664 | H6  | LIG | 95 | -17.139 | -18.284 | -13.507 | 1.00 | 0.00 |
| ATOM | 1665 | C4  | LIG | 95 | -15.708 | -15.942 | -16.714 | 1.00 | 0.00 |
| ATOM | 1666 | H7  | LIG | 95 | -14.940 | -16.463 | -17.301 | 1.00 | 0.00 |
| ATOM | 1667 | H8  | LIG | 95 | -15.167 | -15.261 | -16.045 | 1.00 | 0.00 |
| ATOM | 1668 | C5  | LIG | 95 | -15.482 | -19.620 | -13.144 | 1.00 | 0.00 |
| ATOM | 1669 | H9  | LIG | 95 | -14.711 | -20.139 | -13.727 | 1.00 | 0.00 |
| ATOM | 1670 | H10 | LIG | 95 | -14.947 | -18.938 | -12.472 | 1.00 | 0.00 |
| ATOM | 1671 | C6  | LIG | 95 | -16.596 | -15.124 | -17.658 | 1.00 | 0.00 |

|      |      |     |     |    |         |         |         |      |      |
|------|------|-----|-----|----|---------|---------|---------|------|------|
| ATOM | 1672 | H11 | LIG | 95 | -17.364 | -14.603 | -17.071 | 1.00 | 0.00 |
| ATOM | 1673 | H12 | LIG | 95 | -17.137 | -15.806 | -18.328 | 1.00 | 0.00 |
| ATOM | 1674 | C7  | LIG | 95 | -16.261 | -20.643 | -12.311 | 1.00 | 0.00 |
| ATOM | 1675 | H13 | LIG | 95 | -17.033 | -20.123 | -11.730 | 1.00 | 0.00 |
| ATOM | 1676 | H14 | LIG | 95 | -16.792 | -21.328 | -12.984 | 1.00 | 0.00 |
| ATOM | 1677 | C8  | LIG | 95 | -15.823 | -14.101 | -18.498 | 1.00 | 0.00 |
| ATOM | 1678 | H15 | LIG | 95 | -15.282 | -13.418 | -17.830 | 1.00 | 0.00 |
| ATOM | 1679 | H16 | LIG | 95 | -15.054 | -14.621 | -19.084 | 1.00 | 0.00 |
| ATOM | 1680 | C9  | LIG | 95 | -15.362 | -21.449 | -11.363 | 1.00 | 0.00 |
| ATOM | 1681 | H17 | LIG | 95 | -14.845 | -20.775 | -10.673 | 1.00 | 0.00 |
| ATOM | 1682 | H18 | LIG | 95 | -14.593 | -21.977 | -11.935 | 1.00 | 0.00 |
| ATOM | 1683 | C10 | LIG | 95 | -16.710 | -13.282 | -19.443 | 1.00 | 0.00 |
| ATOM | 1684 | H19 | LIG | 95 | -17.477 | -12.763 | -18.856 | 1.00 | 0.00 |
| ATOM | 1685 | H20 | LIG | 95 | -17.249 | -13.964 | -20.112 | 1.00 | 0.00 |
| ATOM | 1686 | C11 | LIG | 95 | -16.157 | -22.458 | -10.557 | 1.00 | 0.00 |
| ATOM | 1687 | H21 | LIG | 95 | -16.908 | -21.973 | -9.928  | 1.00 | 0.00 |
| ATOM | 1688 | H22 | LIG | 95 | -16.641 | -23.200 | -11.198 | 1.00 | 0.00 |
| ATOM | 1689 | C12 | LIG | 95 | -15.928 | -12.262 | -20.276 | 1.00 | 0.00 |
| ATOM | 1690 | H23 | LIG | 95 | -15.175 | -12.756 | -20.899 | 1.00 | 0.00 |
| ATOM | 1691 | H24 | LIG | 95 | -16.588 | -11.698 | -20.940 | 1.00 | 0.00 |
| ATOM | 1692 | H25 | LIG | 95 | -15.407 | -11.545 | -19.636 | 1.00 | 0.00 |

TER

|      |      |     |     |    |        |        |         |      |      |
|------|------|-----|-----|----|--------|--------|---------|------|------|
| ATOM | 1693 | S1  | LIG | 96 | -7.309 | 17.526 | -21.485 | 1.00 | 0.00 |
| ATOM | 1694 | O1  | LIG | 96 | -6.791 | 18.191 | -20.099 | 1.00 | 0.00 |
| ATOM | 1695 | O2  | LIG | 96 | -8.182 | 18.786 | -21.994 | 1.00 | 0.00 |
| ATOM | 1696 | H26 | LIG | 96 | -9.003 | 18.843 | -21.482 | 1.00 | 0.00 |
| ATOM | 1697 | O3  | LIG | 96 | -6.215 | 17.387 | -22.412 | 1.00 | 0.00 |
| ATOM | 1698 | O4  | LIG | 96 | -8.190 | 16.417 | -21.177 | 1.00 | 0.00 |
| ATOM | 1699 | C1  | LIG | 96 | -2.734 | 18.369 | -13.773 | 1.00 | 0.00 |
| ATOM | 1700 | H1  | LIG | 96 | -2.333 | 19.346 | -14.068 | 1.00 | 0.00 |
| ATOM | 1701 | H2  | LIG | 96 | -3.645 | 18.576 | -13.197 | 1.00 | 0.00 |
| ATOM | 1702 | C2  | LIG | 96 | -1.719 | 17.656 | -12.872 | 1.00 | 0.00 |
| ATOM | 1703 | H3  | LIG | 96 | -0.808 | 17.449 | -13.447 | 1.00 | 0.00 |
| ATOM | 1704 | H4  | LIG | 96 | -2.121 | 16.678 | -12.577 | 1.00 | 0.00 |
| ATOM | 1705 | C3  | LIG | 96 | -3.101 | 17.573 | -15.030 | 1.00 | 0.00 |
| ATOM | 1706 | H5  | LIG | 96 | -3.505 | 16.595 | -14.735 | 1.00 | 0.00 |
| ATOM | 1707 | H6  | LIG | 96 | -2.189 | 17.364 | -15.605 | 1.00 | 0.00 |
| ATOM | 1708 | C4  | LIG | 96 | -1.351 | 18.450 | -11.613 | 1.00 | 0.00 |
| ATOM | 1709 | H7  | LIG | 96 | -2.263 | 18.657 | -11.037 | 1.00 | 0.00 |
| ATOM | 1710 | H8  | LIG | 96 | -0.951 | 19.429 | -11.907 | 1.00 | 0.00 |
| ATOM | 1711 | C5  | LIG | 96 | -4.114 | 18.286 | -15.933 | 1.00 | 0.00 |
| ATOM | 1712 | H9  | LIG | 96 | -5.025 | 18.498 | -15.359 | 1.00 | 0.00 |
| ATOM | 1713 | H10 | LIG | 96 | -3.709 | 19.261 | -16.232 | 1.00 | 0.00 |
| ATOM | 1714 | C6  | LIG | 96 | -0.336 | 17.739 | -10.712 | 1.00 | 0.00 |



|      |      |     |     |    |        |        |         |      |      |
|------|------|-----|-----|----|--------|--------|---------|------|------|
| ATOM | 1715 | H11 | LIG | 96 | 0.575  | 17.532 | -11.288 | 1.00 | 0.00 |
| ATOM | 1716 | H12 | LIG | 96 | -0.737 | 16.759 | -10.418 | 1.00 | 0.00 |
| ATOM | 1717 | C7  | LIG | 96 | -4.480 | 17.486 | -17.188 | 1.00 | 0.00 |
| ATOM | 1718 | H13 | LIG | 96 | -3.568 | 17.273 | -17.760 | 1.00 | 0.00 |
| ATOM | 1719 | H14 | LIG | 96 | -4.890 | 16.513 | -16.888 | 1.00 | 0.00 |
| ATOM | 1720 | C8  | LIG | 96 | 0.032  | 18.532 | -9.454  | 1.00 | 0.00 |
| ATOM | 1721 | H15 | LIG | 96 | 0.434  | 19.511 | -9.747  | 1.00 | 0.00 |
| ATOM | 1722 | H16 | LIG | 96 | -0.879 | 18.740 | -8.877  | 1.00 | 0.00 |
| ATOM | 1723 | C9  | LIG | 96 | -5.490 | 18.213 | -18.086 | 1.00 | 0.00 |
| ATOM | 1724 | H17 | LIG | 96 | -5.081 | 19.177 | -18.408 | 1.00 | 0.00 |
| ATOM | 1725 | H18 | LIG | 96 | -6.407 | 18.424 | -17.525 | 1.00 | 0.00 |
| ATOM | 1726 | C10 | LIG | 96 | 1.048  | 17.821 | -8.552  | 1.00 | 0.00 |
| ATOM | 1727 | H19 | LIG | 96 | 1.957  | 17.614 | -9.128  | 1.00 | 0.00 |
| ATOM | 1728 | H20 | LIG | 96 | 0.646  | 16.844 | -8.257  | 1.00 | 0.00 |
| ATOM | 1729 | C11 | LIG | 96 | -5.840 | 17.396 | -19.315 | 1.00 | 0.00 |
| ATOM | 1730 | H21 | LIG | 96 | -4.962 | 17.203 | -19.936 | 1.00 | 0.00 |
| ATOM | 1731 | H22 | LIG | 96 | -6.317 | 16.449 | -19.050 | 1.00 | 0.00 |
| ATOM | 1732 | C12 | LIG | 96 | 1.409  | 18.623 | -7.297  | 1.00 | 0.00 |
| ATOM | 1733 | H23 | LIG | 96 | 0.524  | 18.816 | -6.683  | 1.00 | 0.00 |
| ATOM | 1734 | H24 | LIG | 96 | 2.133  | 18.088 | -6.676  | 1.00 | 0.00 |
| ATOM | 1735 | H25 | LIG | 96 | 1.847  | 19.590 | -7.559  | 1.00 | 0.00 |

TER

|      |      |     |     |    |        |        |        |      |      |
|------|------|-----|-----|----|--------|--------|--------|------|------|
| ATOM | 1736 | S1  | LIG | 97 | 8.307  | 20.084 | 13.957 | 1.00 | 0.00 |
| ATOM | 1737 | O1  | LIG | 97 | 9.842  | 20.053 | 14.477 | 1.00 | 0.00 |
| ATOM | 1738 | O2  | LIG | 97 | 7.680  | 19.177 | 15.136 | 1.00 | 0.00 |
| ATOM | 1739 | H26 | LIG | 97 | 7.918  | 18.248 | 14.995 | 1.00 | 0.00 |
| ATOM | 1740 | O3  | LIG | 97 | 7.751  | 21.405 | 14.119 | 1.00 | 0.00 |
| ATOM | 1741 | O4  | LIG | 97 | 8.220  | 19.374 | 12.697 | 1.00 | 0.00 |
| ATOM | 1742 | C1  | LIG | 97 | 17.094 | 22.025 | 14.310 | 1.00 | 0.00 |
| ATOM | 1743 | H1  | LIG | 97 | 17.034 | 22.307 | 15.369 | 1.00 | 0.00 |
| ATOM | 1744 | H2  | LIG | 97 | 17.380 | 20.966 | 14.293 | 1.00 | 0.00 |
| ATOM | 1745 | C2  | LIG | 97 | 18.190 | 22.854 | 13.629 | 1.00 | 0.00 |
| ATOM | 1746 | H3  | LIG | 97 | 17.905 | 23.914 | 13.646 | 1.00 | 0.00 |
| ATOM | 1747 | H4  | LIG | 97 | 18.250 | 22.573 | 12.569 | 1.00 | 0.00 |
| ATOM | 1748 | C3  | LIG | 97 | 15.714 | 22.187 | 13.664 | 1.00 | 0.00 |
| ATOM | 1749 | H5  | LIG | 97 | 15.775 | 21.903 | 12.605 | 1.00 | 0.00 |
| ATOM | 1750 | H6  | LIG | 97 | 15.430 | 23.247 | 13.679 | 1.00 | 0.00 |
| ATOM | 1751 | C4  | LIG | 97 | 19.572 | 22.693 | 14.273 | 1.00 | 0.00 |
| ATOM | 1752 | H7  | LIG | 97 | 19.858 | 21.633 | 14.255 | 1.00 | 0.00 |
| ATOM | 1753 | H8  | LIG | 97 | 19.512 | 22.972 | 15.333 | 1.00 | 0.00 |
| ATOM | 1754 | C5  | LIG | 97 | 14.618 | 21.361 | 14.347 | 1.00 | 0.00 |
| ATOM | 1755 | H9  | LIG | 97 | 14.902 | 20.301 | 14.335 | 1.00 | 0.00 |
| ATOM | 1756 | H10 | LIG | 97 | 14.554 | 21.647 | 15.405 | 1.00 | 0.00 |
| ATOM | 1757 | C6  | LIG | 97 | 20.667 | 23.522 | 13.593 | 1.00 | 0.00 |

|      |      |     |     |    |        |        |        |      |      |
|------|------|-----|-----|----|--------|--------|--------|------|------|
| ATOM | 1758 | H11 | LIG | 97 | 20.381 | 24.581 | 13.610 | 1.00 | 0.00 |
| ATOM | 1759 | H12 | LIG | 97 | 20.728 | 23.242 | 12.533 | 1.00 | 0.00 |
| ATOM | 1760 | C7  | LIG | 97 | 13.240 | 21.523 | 13.697 | 1.00 | 0.00 |
| ATOM | 1761 | H13 | LIG | 97 | 12.958 | 22.584 | 13.707 | 1.00 | 0.00 |
| ATOM | 1762 | H14 | LIG | 97 | 13.303 | 21.232 | 12.640 | 1.00 | 0.00 |
| ATOM | 1763 | C8  | LIG | 97 | 22.049 | 23.362 | 14.236 | 1.00 | 0.00 |
| ATOM | 1764 | H15 | LIG | 97 | 21.991 | 23.642 | 15.296 | 1.00 | 0.00 |
| ATOM | 1765 | H16 | LIG | 97 | 22.335 | 22.301 | 14.220 | 1.00 | 0.00 |
| ATOM | 1766 | C9  | LIG | 97 | 12.150 | 20.696 | 14.392 | 1.00 | 0.00 |
| ATOM | 1767 | H17 | LIG | 97 | 12.065 | 20.995 | 15.442 | 1.00 | 0.00 |
| ATOM | 1768 | H18 | LIG | 97 | 12.420 | 19.635 | 14.380 | 1.00 | 0.00 |
| ATOM | 1769 | C10 | LIG | 97 | 23.146 | 24.190 | 13.557 | 1.00 | 0.00 |
| ATOM | 1770 | H19 | LIG | 97 | 22.859 | 25.248 | 13.573 | 1.00 | 0.00 |
| ATOM | 1771 | H20 | LIG | 97 | 23.205 | 23.908 | 12.498 | 1.00 | 0.00 |
| ATOM | 1772 | C11 | LIG | 97 | 10.800 | 20.869 | 13.724 | 1.00 | 0.00 |
| ATOM | 1773 | H21 | LIG | 97 | 10.463 | 21.908 | 13.756 | 1.00 | 0.00 |
| ATOM | 1774 | H22 | LIG | 97 | 10.811 | 20.520 | 12.688 | 1.00 | 0.00 |
| ATOM | 1775 | C12 | LIG | 97 | 24.522 | 24.023 | 14.208 | 1.00 | 0.00 |
| ATOM | 1776 | H23 | LIG | 97 | 24.850 | 22.979 | 14.176 | 1.00 | 0.00 |
| ATOM | 1777 | H24 | LIG | 97 | 25.280 | 24.625 | 13.699 | 1.00 | 0.00 |
| ATOM | 1778 | H25 | LIG | 97 | 24.503 | 24.331 | 15.257 | 1.00 | 0.00 |

TER

|      |      |     |     |    |        |         |       |      |      |
|------|------|-----|-----|----|--------|---------|-------|------|------|
| ATOM | 1779 | S1  | LIG | 98 | 5.571  | -25.030 | 4.415 | 1.00 | 0.00 |
| ATOM | 1780 | O1  | LIG | 98 | 5.121  | -23.477 | 4.282 | 1.00 | 0.00 |
| ATOM | 1781 | O2  | LIG | 98 | 6.558  | -25.059 | 3.138 | 1.00 | 0.00 |
| ATOM | 1782 | H26 | LIG | 98 | 6.036  | -25.074 | 2.321 | 1.00 | 0.00 |
| ATOM | 1783 | O3  | LIG | 98 | 6.403  | -25.211 | 5.578 | 1.00 | 0.00 |
| ATOM | 1784 | O4  | LIG | 98 | 4.423  | -25.878 | 4.163 | 1.00 | 0.00 |
| ATOM | 1785 | C1  | LIG | 98 | 1.598  | -17.229 | 6.530 | 1.00 | 0.00 |
| ATOM | 1786 | H1  | LIG | 98 | 2.540  | -16.674 | 6.438 | 1.00 | 0.00 |
| ATOM | 1787 | H2  | LIG | 98 | 1.106  | -17.156 | 5.551 | 1.00 | 0.00 |
| ATOM | 1788 | C2  | LIG | 98 | 0.716  | -16.555 | 7.588 | 1.00 | 0.00 |
| ATOM | 1789 | H3  | LIG | 98 | 1.207  | -16.627 | 8.567 | 1.00 | 0.00 |
| ATOM | 1790 | H4  | LIG | 98 | -0.227 | -17.110 | 7.680 | 1.00 | 0.00 |
| ATOM | 1791 | C3  | LIG | 98 | 1.904  | -18.699 | 6.834 | 1.00 | 0.00 |
| ATOM | 1792 | H5  | LIG | 98 | 0.961  | -19.254 | 6.924 | 1.00 | 0.00 |
| ATOM | 1793 | H6  | LIG | 98 | 2.393  | -18.771 | 7.815 | 1.00 | 0.00 |
| ATOM | 1794 | C4  | LIG | 98 | 0.408  | -15.084 | 7.285 | 1.00 | 0.00 |
| ATOM | 1795 | H7  | LIG | 98 | -0.085 | -15.012 | 6.306 | 1.00 | 0.00 |
| ATOM | 1796 | H8  | LIG | 98 | 1.350  | -14.529 | 7.192 | 1.00 | 0.00 |
| ATOM | 1797 | C5  | LIG | 98 | 2.788  | -19.372 | 5.778 | 1.00 | 0.00 |
| ATOM | 1798 | H9  | LIG | 98 | 2.301  | -19.298 | 4.797 | 1.00 | 0.00 |
| ATOM | 1799 | H10 | LIG | 98 | 3.733  | -18.820 | 5.691 | 1.00 | 0.00 |
| ATOM | 1800 | C6  | LIG | 98 | -0.473 | -14.410 | 8.343 | 1.00 | 0.00 |

|      |      |     |     |    |        |         |        |      |      |
|------|------|-----|-----|----|--------|---------|--------|------|------|
| ATOM | 1801 | H11 | LIG | 98 | 0.018  | -14.483 | 9.322  | 1.00 | 0.00 |
| ATOM | 1802 | H12 | LIG | 98 | -1.416 | -14.966 | 8.436  | 1.00 | 0.00 |
| ATOM | 1803 | C7  | LIG | 98 | 3.089  | -20.843 | 6.084  | 1.00 | 0.00 |
| ATOM | 1804 | H13 | LIG | 98 | 3.574  | -20.916 | 7.066  | 1.00 | 0.00 |
| ATOM | 1805 | H14 | LIG | 98 | 2.145  | -21.395 | 6.166  | 1.00 | 0.00 |
| ATOM | 1806 | C8  | LIG | 98 | -0.782 | -12.940 | 8.041  | 1.00 | 0.00 |
| ATOM | 1807 | H15 | LIG | 98 | 0.160  | -12.383 | 7.949  | 1.00 | 0.00 |
| ATOM | 1808 | H16 | LIG | 98 | -1.273 | -12.867 | 7.062  | 1.00 | 0.00 |
| ATOM | 1809 | C9  | LIG | 98 | 3.980  | -21.504 | 5.023  | 1.00 | 0.00 |
| ATOM | 1810 | H17 | LIG | 98 | 4.934  | -20.971 | 4.949  | 1.00 | 0.00 |
| ATOM | 1811 | H18 | LIG | 98 | 3.500  | -21.442 | 4.041  | 1.00 | 0.00 |
| ATOM | 1812 | C10 | LIG | 98 | -1.663 | -12.265 | 9.099  | 1.00 | 0.00 |
| ATOM | 1813 | H19 | LIG | 98 | -1.172 | -12.338 | 10.077 | 1.00 | 0.00 |
| ATOM | 1814 | H20 | LIG | 98 | -2.605 | -12.820 | 9.190  | 1.00 | 0.00 |
| ATOM | 1815 | C11 | LIG | 98 | 4.256  | -22.959 | 5.347  | 1.00 | 0.00 |
| ATOM | 1816 | H21 | LIG | 98 | 4.781  | -23.069 | 6.299  | 1.00 | 0.00 |
| ATOM | 1817 | H22 | LIG | 98 | 3.337  | -23.552 | 5.365  | 1.00 | 0.00 |
| ATOM | 1818 | C12 | LIG | 98 | -1.964 | -10.796 | 8.788  | 1.00 | 0.00 |
| ATOM | 1819 | H23 | LIG | 98 | -2.486 | -10.693 | 7.831  | 1.00 | 0.00 |
| ATOM | 1820 | H24 | LIG | 98 | -2.595 | -10.345 | 9.559  | 1.00 | 0.00 |
| ATOM | 1821 | H25 | LIG | 98 | -1.044 | -10.207 | 8.726  | 1.00 | 0.00 |

TER

|      |      |     |     |    |         |        |        |      |      |
|------|------|-----|-----|----|---------|--------|--------|------|------|
| ATOM | 1822 | S1  | LIG | 99 | -23.498 | 13.100 | 8.915  | 1.00 | 0.00 |
| ATOM | 1823 | O1  | LIG | 99 | -23.309 | 12.620 | 10.453 | 1.00 | 0.00 |
| ATOM | 1824 | O2  | LIG | 99 | -24.934 | 13.813 | 9.107  | 1.00 | 0.00 |
| ATOM | 1825 | H26 | LIG | 99 | -25.625 | 13.139 | 9.191  | 1.00 | 0.00 |
| ATOM | 1826 | O3  | LIG | 99 | -22.560 | 14.148 | 8.600  | 1.00 | 0.00 |
| ATOM | 1827 | O4  | LIG | 99 | -23.644 | 11.932 | 8.070  | 1.00 | 0.00 |
| ATOM | 1828 | C1  | LIG | 99 | -19.514 | 9.563  | 16.177 | 1.00 | 0.00 |
| ATOM | 1829 | H1  | LIG | 99 | -19.704 | 10.464 | 16.774 | 1.00 | 0.00 |
| ATOM | 1830 | H2  | LIG | 99 | -20.355 | 8.886  | 16.371 | 1.00 | 0.00 |
| ATOM | 1831 | C2  | LIG | 99 | -18.215 | 8.904  | 16.658 | 1.00 | 0.00 |
| ATOM | 1832 | H3  | LIG | 99 | -17.373 | 9.581  | 16.464 | 1.00 | 0.00 |
| ATOM | 1833 | H4  | LIG | 99 | -18.024 | 8.003  | 16.060 | 1.00 | 0.00 |
| ATOM | 1834 | C3  | LIG | 99 | -19.496 | 9.936  | 14.691 | 1.00 | 0.00 |
| ATOM | 1835 | H5  | LIG | 99 | -19.308 | 9.034  | 14.093 | 1.00 | 0.00 |
| ATOM | 1836 | H6  | LIG | 99 | -18.653 | 10.611 | 14.497 | 1.00 | 0.00 |
| ATOM | 1837 | C4  | LIG | 99 | -18.230 | 8.530  | 18.144 | 1.00 | 0.00 |
| ATOM | 1838 | H7  | LIG | 99 | -19.072 | 7.852  | 18.338 | 1.00 | 0.00 |
| ATOM | 1839 | H8  | LIG | 99 | -18.423 | 9.430  | 18.742 | 1.00 | 0.00 |
| ATOM | 1840 | C5  | LIG | 99 | -20.793 | 10.598 | 14.210 | 1.00 | 0.00 |
| ATOM | 1841 | H9  | LIG | 99 | -21.638 | 9.925  | 14.406 | 1.00 | 0.00 |
| ATOM | 1842 | H10 | LIG | 99 | -20.980 | 11.501 | 14.804 | 1.00 | 0.00 |
| ATOM | 1843 | C6  | LIG | 99 | -16.932 | 7.871  | 18.626 | 1.00 | 0.00 |

|      |      |     |     |    |         |        |        |      |      |
|------|------|-----|-----|----|---------|--------|--------|------|------|
| ATOM | 1844 | H11 | LIG | 99 | -16.091 | 8.549  | 18.431 | 1.00 | 0.00 |
| ATOM | 1845 | H12 | LIG | 99 | -16.740 | 6.970  | 18.028 | 1.00 | 0.00 |
| ATOM | 1846 | C7  | LIG | 99 | -20.773 | 10.966 | 12.723 | 1.00 | 0.00 |
| ATOM | 1847 | H13 | LIG | 99 | -19.927 | 11.637 | 12.528 | 1.00 | 0.00 |
| ATOM | 1848 | H14 | LIG | 99 | -20.591 | 10.061 | 12.129 | 1.00 | 0.00 |
| ATOM | 1849 | C8  | LIG | 99 | -16.947 | 7.497  | 20.112 | 1.00 | 0.00 |
| ATOM | 1850 | H15 | LIG | 99 | -17.138 | 8.397  | 20.711 | 1.00 | 0.00 |
| ATOM | 1851 | H16 | LIG | 99 | -17.789 | 6.820  | 20.306 | 1.00 | 0.00 |
| ATOM | 1852 | C9  | LIG | 99 | -22.074 | 11.633 | 12.255 | 1.00 | 0.00 |
| ATOM | 1853 | H17 | LIG | 99 | -22.254 | 12.549 | 12.828 | 1.00 | 0.00 |
| ATOM | 1854 | H18 | LIG | 99 | -22.924 | 10.967 | 12.440 | 1.00 | 0.00 |
| ATOM | 1855 | C10 | LIG | 99 | -15.649 | 6.839  | 20.594 | 1.00 | 0.00 |
| ATOM | 1856 | H19 | LIG | 99 | -14.808 | 7.515  | 20.399 | 1.00 | 0.00 |
| ATOM | 1857 | H20 | LIG | 99 | -15.459 | 5.938  | 19.997 | 1.00 | 0.00 |
| ATOM | 1858 | C11 | LIG | 99 | -22.030 | 11.979 | 10.780 | 1.00 | 0.00 |
| ATOM | 1859 | H21 | LIG | 99 | -21.227 | 12.684 | 10.554 | 1.00 | 0.00 |
| ATOM | 1860 | H22 | LIG | 99 | -21.921 | 11.088 | 10.156 | 1.00 | 0.00 |
| ATOM | 1861 | C12 | LIG | 99 | -15.673 | 6.469  | 22.080 | 1.00 | 0.00 |
| ATOM | 1862 | H23 | LIG | 99 | -16.484 | 5.766  | 22.300 | 1.00 | 0.00 |
| ATOM | 1863 | H24 | LIG | 99 | -14.736 | 6.001  | 22.391 | 1.00 | 0.00 |
| ATOM | 1864 | H25 | LIG | 99 | -15.826 | 7.354  | 22.706 | 1.00 | 0.00 |

TER

|      |      |     |     |     |        |         |         |      |      |
|------|------|-----|-----|-----|--------|---------|---------|------|------|
| ATOM | 1865 | S1  | LIG | 100 | -7.086 | -20.723 | -11.396 | 1.00 | 0.00 |
| ATOM | 1866 | O1  | LIG | 100 | -5.565 | -20.355 | -11.821 | 1.00 | 0.00 |
| ATOM | 1867 | O2  | LIG | 100 | -6.758 | -22.143 | -10.701 | 1.00 | 0.00 |
| ATOM | 1868 | H26 | LIG | 100 | -6.577 | -22.807 | -11.384 | 1.00 | 0.00 |
| ATOM | 1869 | O3  | LIG | 100 | -7.536 | -19.847 | -10.344 | 1.00 | 0.00 |
| ATOM | 1870 | O4  | LIG | 100 | -7.873 | -20.937 | -12.594 | 1.00 | 0.00 |
| ATOM | 1871 | C1  | LIG | 100 | -0.205 | -15.888 | -14.619 | 1.00 | 0.00 |
| ATOM | 1872 | H1  | LIG | 100 | 0.381  | -16.030 | -13.703 | 1.00 | 0.00 |
| ATOM | 1873 | H2  | LIG | 100 | 0.103  | -16.689 | -15.304 | 1.00 | 0.00 |
| ATOM | 1874 | C2  | LIG | 100 | 0.149  | -14.532 | -15.240 | 1.00 | 0.00 |
| ATOM | 1875 | H3  | LIG | 100 | -0.158 | -13.730 | -14.556 | 1.00 | 0.00 |
| ATOM | 1876 | H4  | LIG | 100 | -0.437 | -14.389 | -16.157 | 1.00 | 0.00 |
| ATOM | 1877 | C3  | LIG | 100 | -1.695 | -16.043 | -14.297 | 1.00 | 0.00 |
| ATOM | 1878 | H5  | LIG | 100 | -2.281 | -15.903 | -15.215 | 1.00 | 0.00 |
| ATOM | 1879 | H6  | LIG | 100 | -2.002 | -15.240 | -13.614 | 1.00 | 0.00 |
| ATOM | 1880 | C4  | LIG | 100 | 1.639  | -14.374 | -15.565 | 1.00 | 0.00 |
| ATOM | 1881 | H7  | LIG | 100 | 1.946  | -15.176 | -16.250 | 1.00 | 0.00 |
| ATOM | 1882 | H8  | LIG | 100 | 2.226  | -14.518 | -14.648 | 1.00 | 0.00 |
| ATOM | 1883 | C5  | LIG | 100 | -2.049 | -17.398 | -13.674 | 1.00 | 0.00 |
| ATOM | 1884 | H9  | LIG | 100 | -1.739 | -18.202 | -14.354 | 1.00 | 0.00 |
| ATOM | 1885 | H10 | LIG | 100 | -1.467 | -17.538 | -12.754 | 1.00 | 0.00 |
| ATOM | 1886 | C6  | LIG | 100 | 1.994  | -13.018 | -16.184 | 1.00 | 0.00 |



|      |      |     |     |     |        |         |         |      |      |
|------|------|-----|-----|-----|--------|---------|---------|------|------|
| ATOM | 1887 | H11 | LIG | 100 | 1.686  | -12.217 | -15.500 | 1.00 | 0.00 |
| ATOM | 1888 | H12 | LIG | 100 | 1.407  | -12.874 | -17.101 | 1.00 | 0.00 |
| ATOM | 1889 | C7  | LIG | 100 | -3.540 | -17.551 | -13.355 | 1.00 | 0.00 |
| ATOM | 1890 | H13 | LIG | 100 | -3.849 | -16.745 | -12.676 | 1.00 | 0.00 |
| ATOM | 1891 | H14 | LIG | 100 | -4.121 | -17.417 | -14.276 | 1.00 | 0.00 |
| ATOM | 1892 | C8  | LIG | 100 | 3.483  | -12.860 | -16.509 | 1.00 | 0.00 |
| ATOM | 1893 | H15 | LIG | 100 | 4.071  | -13.003 | -15.593 | 1.00 | 0.00 |
| ATOM | 1894 | H16 | LIG | 100 | 3.791  | -13.662 | -17.193 | 1.00 | 0.00 |
| ATOM | 1895 | C9  | LIG | 100 | -3.880 | -18.909 | -12.726 | 1.00 | 0.00 |
| ATOM | 1896 | H17 | LIG | 100 | -3.320 | -19.043 | -11.795 | 1.00 | 0.00 |
| ATOM | 1897 | H18 | LIG | 100 | -3.582 | -19.719 | -13.400 | 1.00 | 0.00 |
| ATOM | 1898 | C10 | LIG | 100 | 3.839  | -11.504 | -17.129 | 1.00 | 0.00 |
| ATOM | 1899 | H19 | LIG | 100 | 3.531  | -10.704 | -16.445 | 1.00 | 0.00 |
| ATOM | 1900 | H20 | LIG | 100 | 3.253  | -11.362 | -18.045 | 1.00 | 0.00 |
| ATOM | 1901 | C11 | LIG | 100 | -5.362 | -19.035 | -12.429 | 1.00 | 0.00 |
| ATOM | 1902 | H21 | LIG | 100 | -5.698 | -18.277 | -11.718 | 1.00 | 0.00 |
| ATOM | 1903 | H22 | LIG | 100 | -5.966 | -18.978 | -13.338 | 1.00 | 0.00 |
| ATOM | 1904 | C12 | LIG | 100 | 5.330  | -11.356 | -17.449 | 1.00 | 0.00 |
| ATOM | 1905 | H23 | LIG | 100 | 5.659  | -12.123 | -18.157 | 1.00 | 0.00 |
| ATOM | 1906 | H24 | LIG | 100 | 5.549  | -10.380 | -17.890 | 1.00 | 0.00 |
| ATOM | 1907 | H25 | LIG | 100 | 5.940  | -11.457 | -16.546 | 1.00 | 0.00 |

TER

END

**Table T:** The number of atoms present in the system of MO-Sum

|      |    |     |     |   |         |        |        |      |      |
|------|----|-----|-----|---|---------|--------|--------|------|------|
| ATOM | 1  | N   | PRO | 1 | -12.882 | 10.175 | -6.544 | 1.00 | 0.00 |
| ATOM | 2  | H2  | PRO | 1 | -13.237 | 9.245  | -6.372 | 1.00 | 0.00 |
| ATOM | 3  | H3  | PRO | 1 | -13.507 | 10.904 | -6.861 | 1.00 | 0.00 |
| ATOM | 4  | CD  | PRO | 1 | -12.277 | 10.723 | -5.309 | 1.00 | 0.00 |
| ATOM | 5  | HD2 | PRO | 1 | -12.263 | 9.947  | -4.545 | 1.00 | 0.00 |
| ATOM | 6  | HD3 | PRO | 1 | -12.878 | 11.564 | -4.961 | 1.00 | 0.00 |
| ATOM | 7  | CG  | PRO | 1 | -10.891 | 11.143 | -5.735 | 1.00 | 0.00 |
| ATOM | 8  | HG2 | PRO | 1 | -10.173 | 10.610 | -5.112 | 1.00 | 0.00 |
| ATOM | 9  | HG3 | PRO | 1 | -10.797 | 12.215 | -5.561 | 1.00 | 0.00 |
| ATOM | 10 | CB  | PRO | 1 | -10.701 | 10.814 | -7.207 | 1.00 | 0.00 |
| ATOM | 11 | HB2 | PRO | 1 | -9.765  | 10.275 | -7.347 | 1.00 | 0.00 |
| ATOM | 12 | HB3 | PRO | 1 | -10.698 | 11.714 | -7.823 | 1.00 | 0.00 |
| ATOM | 13 | CA  | PRO | 1 | -11.885 | 9.915  | -7.598 | 1.00 | 0.00 |
| ATOM | 14 | HA  | PRO | 1 | -12.323 | 10.223 | -8.548 | 1.00 | 0.00 |
| ATOM | 15 | C   | PRO | 1 | -11.458 | 8.428  | -7.685 | 1.00 | 0.00 |
| ATOM | 16 | O   | PRO | 1 | -11.732 | 7.639  | -6.761 | 1.00 | 0.00 |
| ATOM | 17 | N   | PRO | 2 | -10.832 | 8.040  | -8.801 | 1.00 | 0.00 |
| ATOM | 18 | CD  | PRO | 2 | -10.428 | 8.911  | -9.910 | 1.00 | 0.00 |
| ATOM | 19 | HD2 | PRO | 2 | -9.665  | 9.603  | -9.553 | 1.00 | 0.00 |

|      |    |          |   |         |       |         |      |      |
|------|----|----------|---|---------|-------|---------|------|------|
| ATOM | 20 | HD3 PRO  | 2 | -11.298 | 9.474 | -10.248 | 1.00 | 0.00 |
| ATOM | 21 | CG PRO   | 2 | -9.917  | 7.987 | -10.946 | 1.00 | 0.00 |
| ATOM | 22 | HG2 PRO  | 2 | -8.905  | 8.297 | -11.205 | 1.00 | 0.00 |
| ATOM | 23 | HG3 PRO  | 2 | -10.559 | 8.075 | -11.823 | 1.00 | 0.00 |
| ATOM | 24 | CB PRO   | 2 | -9.940  | 6.616 | -10.414 | 1.00 | 0.00 |
| ATOM | 25 | HB2 PRO  | 2 | -8.926  | 6.220 | -10.462 | 1.00 | 0.00 |
| ATOM | 26 | HB3 PRO  | 2 | -10.609 | 5.971 | -10.983 | 1.00 | 0.00 |
| ATOM | 27 | CA PRO   | 2 | -10.397 | 6.690 | -8.970  | 1.00 | 0.00 |
| ATOM | 28 | HA PRO   | 2 | -11.246 | 6.032 | -8.783  | 1.00 | 0.00 |
| ATOM | 29 | C PRO    | 2 | -9.254  | 6.332 | -8.016  | 1.00 | 0.00 |
| ATOM | 30 | O PRO    | 2 | -8.511  | 7.152 | -7.566  | 1.00 | 0.00 |
| ATOM | 31 | N THR    | 3 | -9.105  | 5.050 | -7.789  | 1.00 | 0.00 |
| ATOM | 32 | H THR    | 3 | -9.617  | 4.357 | -8.316  | 1.00 | 0.00 |
| ATOM | 33 | CA THR   | 3 | -8.205  | 4.599 | -6.764  | 1.00 | 0.00 |
| ATOM | 34 | HA THR   | 3 | -8.538  | 5.042 | -5.825  | 1.00 | 0.00 |
| ATOM | 35 | CB THR   | 3 | -8.316  | 3.072 | -6.652  | 1.00 | 0.00 |
| ATOM | 36 | HB THR   | 3 | -8.023  | 2.628 | -7.603  | 1.00 | 0.00 |
| ATOM | 37 | CG2 THR  | 3 | -7.444  | 2.562 | -5.583  | 1.00 | 0.00 |
| ATOM | 38 | HG21 THR | 3 | -7.737  | 3.006 | -4.632  | 1.00 | 0.00 |
| ATOM | 39 | HG22 THR | 3 | -7.539  | 1.478 | -5.522  | 1.00 | 0.00 |
| ATOM | 40 | HG23 THR | 3 | -6.409  | 2.824 | -5.802  | 1.00 | 0.00 |
| ATOM | 41 | OG1 THR  | 3 | -9.673  | 2.765 | -6.253  | 1.00 | 0.00 |

|      |    |          |   |        |       |         |      |      |
|------|----|----------|---|--------|-------|---------|------|------|
| ATOM | 42 | HG1 THR  | 3 | -9.776 | 1.814 | -6.174  | 1.00 | 0.00 |
| ATOM | 43 | C THR    | 3 | -6.786 | 4.961 | -7.059  | 1.00 | 0.00 |
| ATOM | 44 | O THR    | 3 | -6.084 | 5.419 | -6.177  | 1.00 | 0.00 |
| ATOM | 45 | N LEU    | 4 | -6.369 | 4.769 | -8.308  | 1.00 | 0.00 |
| ATOM | 46 | H LEU    | 4 | -6.924 | 4.383 | -9.059  | 1.00 | 0.00 |
| ATOM | 47 | CA LEU   | 4 | -4.950 | 5.091 | -8.578  | 1.00 | 0.00 |
| ATOM | 48 | HA LEU   | 4 | -4.334 | 4.560 | -7.853  | 1.00 | 0.00 |
| ATOM | 49 | CB LEU   | 4 | -4.496 | 4.700 | -9.986  | 1.00 | 0.00 |
| ATOM | 50 | HB2 LEU  | 4 | -4.668 | 3.624 | -10.011 | 1.00 | 0.00 |
| ATOM | 51 | HB3 LEU  | 4 | -5.152 | 5.189 | -10.706 | 1.00 | 0.00 |
| ATOM | 52 | CG LEU   | 4 | -3.062 | 4.987 | -10.339 | 1.00 | 0.00 |
| ATOM | 53 | HG LEU   | 4 | -2.919 | 6.063 | -10.237 | 1.00 | 0.00 |
| ATOM | 54 | CD1 LEU  | 4 | -2.050 | 4.261 | -9.483  | 1.00 | 0.00 |
| ATOM | 55 | HD11 LEU | 4 | -2.193 | 3.185 | -9.585  | 1.00 | 0.00 |
| ATOM | 56 | HD12 LEU | 4 | -1.044 | 4.526 | -9.806  | 1.00 | 0.00 |
| ATOM | 57 | HD13 LEU | 4 | -2.184 | 4.548 | -8.440  | 1.00 | 0.00 |
| ATOM | 58 | CD2 LEU  | 4 | -2.903 | 4.638 | -11.783 | 1.00 | 0.00 |
| ATOM | 59 | HD21 LEU | 4 | -3.581 | 5.247 | -12.382 | 1.00 | 0.00 |
| ATOM | 60 | HD22 LEU | 4 | -1.876 | 4.829 | -12.093 | 1.00 | 0.00 |
| ATOM | 61 | HD23 LEU | 4 | -3.137 | 3.584 | -11.931 | 1.00 | 0.00 |
| ATOM | 62 | C LEU    | 4 | -4.680 | 6.568 | -8.364  | 1.00 | 0.00 |
| ATOM | 63 | O LEU    | 4 | -3.673 | 6.922 | -7.842  | 1.00 | 0.00 |

|      |    |      |     |   |        |        |         |      |      |
|------|----|------|-----|---|--------|--------|---------|------|------|
| ATOM | 64 | N    | GLN | 5 | -5.606 | 7.416  | -8.758  | 1.00 | 0.00 |
| ATOM | 65 | H    | GLN | 5 | -6.422 | 7.123  | -9.276  | 1.00 | 0.00 |
| ATOM | 66 | CA   | GLN | 5 | -5.400 | 8.841  | -8.545  | 1.00 | 0.00 |
| ATOM | 67 | HA   | GLN | 5 | -4.417 | 9.143  | -8.905  | 1.00 | 0.00 |
| ATOM | 68 | CB   | GLN | 5 | -6.474 | 9.629  | -9.326  | 1.00 | 0.00 |
| ATOM | 69 | HB2  | GLN | 5 | -6.344 | 9.399  | -10.384 | 1.00 | 0.00 |
| ATOM | 70 | HB3  | GLN | 5 | -7.449 | 9.271  | -8.994  | 1.00 | 0.00 |
| ATOM | 71 | CG   | GLN | 5 | -6.390 | 11.156 | -9.119  | 1.00 | 0.00 |
| ATOM | 72 | HG2  | GLN | 5 | -6.340 | 11.412 | -8.061  | 1.00 | 0.00 |
| ATOM | 73 | HG3  | GLN | 5 | -5.478 | 11.487 | -9.616  | 1.00 | 0.00 |
| ATOM | 74 | CD   | GLN | 5 | -7.571 | 11.884 | -9.739  | 1.00 | 0.00 |
| ATOM | 75 | OE1  | GLN | 5 | -8.205 | 11.379 | -10.706 | 1.00 | 0.00 |
| ATOM | 76 | NE2  | GLN | 5 | -7.922 | 13.046 | -9.154  | 1.00 | 0.00 |
| ATOM | 77 | HE21 | GLN | 5 | -8.700 | 13.578 | -9.520  | 1.00 | 0.00 |
| ATOM | 78 | HE22 | GLN | 5 | -7.407 | 13.381 | -8.353  | 1.00 | 0.00 |
| ATOM | 79 | C    | GLN | 5 | -5.374 | 9.222  | -7.054  | 1.00 | 0.00 |
| ATOM | 80 | O    | GLN | 5 | -4.506 | 9.997  | -6.635  | 1.00 | 0.00 |
| ATOM | 81 | N    | ARG | 6 | -6.165 | 8.510  | -6.217  | 1.00 | 0.00 |
| ATOM | 82 | H    | ARG | 6 | -6.791 | 7.811  | -6.591  | 1.00 | 0.00 |
| ATOM | 83 | CA   | ARG | 6 | -6.171 | 8.738  | -4.818  | 1.00 | 0.00 |
| ATOM | 84 | HA   | ARG | 6 | -6.291 | 9.804  | -4.621  | 1.00 | 0.00 |
| ATOM | 85 | CB   | ARG | 6 | -7.308 | 7.994  | -4.159  | 1.00 | 0.00 |

|      |     |          |   |         |       |        |      |      |
|------|-----|----------|---|---------|-------|--------|------|------|
| ATOM | 86  | HB2 ARG  | 6 | -7.215  | 6.957 | -4.481 | 1.00 | 0.00 |
| ATOM | 87  | HB3 ARG  | 6 | -7.127  | 8.059 | -3.086 | 1.00 | 0.00 |
| ATOM | 88  | CG ARG   | 6 | -8.705  | 8.494 | -4.466 | 1.00 | 0.00 |
| ATOM | 89  | HG2 ARG  | 6 | -8.674  | 9.584 | -4.491 | 1.00 | 0.00 |
| ATOM | 90  | HG3 ARG  | 6 | -8.989  | 8.117 | -5.449 | 1.00 | 0.00 |
| ATOM | 91  | CD ARG   | 6 | -9.758  | 8.026 | -3.403 | 1.00 | 0.00 |
| ATOM | 92  | HD2 ARG  | 6 | -9.621  | 8.649 | -2.520 | 1.00 | 0.00 |
| ATOM | 93  | HD3 ARG  | 6 | -10.746 | 8.210 | -3.827 | 1.00 | 0.00 |
| ATOM | 94  | NE ARG   | 6 | -9.673  | 6.608 | -3.000 | 1.00 | 0.00 |
| ATOM | 95  | HE ARG   | 6 | -9.146  | 6.415 | -2.161 | 1.00 | 0.00 |
| ATOM | 96  | CZ ARG   | 6 | -10.237 | 5.577 | -3.656 | 1.00 | 0.00 |
| ATOM | 97  | NH1 ARG  | 6 | -10.969 | 5.759 | -4.756 | 1.00 | 0.00 |
| ATOM | 98  | HH11 ARG | 6 | -11.111 | 6.692 | -5.116 | 1.00 | 0.00 |
| ATOM | 99  | HH12 ARG | 6 | -11.378 | 4.963 | -5.224 | 1.00 | 0.00 |
| ATOM | 100 | NH2 ARG  | 6 | -10.071 | 4.317 | -3.211 | 1.00 | 0.00 |
| ATOM | 101 | HH21 ARG | 6 | -9.521  | 4.146 | -2.382 | 1.00 | 0.00 |
| ATOM | 102 | HH22 ARG | 6 | -10.498 | 3.549 | -3.709 | 1.00 | 0.00 |
| ATOM | 103 | C ARG    | 6 | -4.829  | 8.280 | -4.275 | 1.00 | 0.00 |
| ATOM | 104 | O ARG    | 6 | -4.268  | 8.857 | -3.357 | 1.00 | 0.00 |
| ATOM | 105 | N CYX    | 7 | -4.343  | 7.120 | -4.791 | 1.00 | 0.00 |
| ATOM | 106 | H CYX    | 7 | -4.863  | 6.546 | -5.439 | 1.00 | 0.00 |
| ATOM | 107 | CA CYX   | 7 | -3.049  | 6.656 | -4.351 | 1.00 | 0.00 |

|      |     |     |     |   |        |        |        |      |      |
|------|-----|-----|-----|---|--------|--------|--------|------|------|
| ATOM | 108 | HA  | CYX | 7 | -3.058 | 6.510  | -3.271 | 1.00 | 0.00 |
| ATOM | 109 | CB  | CYX | 7 | -2.690 | 5.296  | -5.037 | 1.00 | 0.00 |
| ATOM | 110 | HB2 | CYX | 7 | -3.306 | 4.502  | -4.615 | 1.00 | 0.00 |
| ATOM | 111 | HB3 | CYX | 7 | -2.876 | 5.369  | -6.109 | 1.00 | 0.00 |
| ATOM | 112 | SG  | CYX | 7 | -0.999 | 4.817  | -4.885 | 1.00 | 0.00 |
| ATOM | 113 | C   | CYX | 7 | -1.950 | 7.688  | -4.636 | 1.00 | 0.00 |
| ATOM | 114 | O   | CYX | 7 | -1.154 | 8.029  | -3.773 | 1.00 | 0.00 |
| ATOM | 115 | N   | CYX | 8 | -1.924 | 8.284  | -5.810 | 1.00 | 0.00 |
| ATOM | 116 | H   | CYX | 8 | -2.668 | 8.146  | -6.479 | 1.00 | 0.00 |
| ATOM | 117 | CA  | CYX | 8 | -0.844 | 9.175  | -6.162 | 1.00 | 0.00 |
| ATOM | 118 | HA  | CYX | 8 | 0.103  | 8.682  | -5.946 | 1.00 | 0.00 |
| ATOM | 119 | CB  | CYX | 8 | -0.865 | 9.556  | -7.607 | 1.00 | 0.00 |
| ATOM | 120 | HB2 | CYX | 8 | -1.847 | 9.954  | -7.864 | 1.00 | 0.00 |
| ATOM | 121 | HB3 | CYX | 8 | -0.106 | 10.315 | -7.794 | 1.00 | 0.00 |
| ATOM | 122 | SG  | CYX | 8 | -0.560 | 8.146  | -8.767 | 1.00 | 0.00 |
| ATOM | 123 | C   | CYX | 8 | -0.955 | 10.492 | -5.357 | 1.00 | 0.00 |
| ATOM | 124 | O   | CYX | 8 | 0.009  | 11.006 | -4.957 | 1.00 | 0.00 |
| ATOM | 125 | N   | ARG | 9 | -2.185 | 10.833 | -5.031 | 1.00 | 0.00 |
| ATOM | 126 | H   | ARG | 9 | -2.973 | 10.348 | -5.436 | 1.00 | 0.00 |
| ATOM | 127 | CA  | ARG | 9 | -2.458 | 12.009 | -4.125 | 1.00 | 0.00 |
| ATOM | 128 | HA  | ARG | 9 | -1.869 | 12.858 | -4.473 | 1.00 | 0.00 |
| ATOM | 129 | CB  | ARG | 9 | -3.911 | 12.411 | -4.097 | 1.00 | 0.00 |

|      |     |      |     |    |        |        |        |      |      |
|------|-----|------|-----|----|--------|--------|--------|------|------|
| ATOM | 130 | HB2  | ARG | 9  | -4.214 | 12.729 | -5.095 | 1.00 | 0.00 |
| ATOM | 131 | HB3  | ARG | 9  | -4.513 | 11.556 | -3.791 | 1.00 | 0.00 |
| ATOM | 132 | CG   | ARG | 9  | -4.115 | 13.527 | -3.139 | 1.00 | 0.00 |
| ATOM | 133 | HG2  | ARG | 9  | -3.774 | 13.188 | -2.161 | 1.00 | 0.00 |
| ATOM | 134 | HG3  | ARG | 9  | -3.497 | 14.362 | -3.470 | 1.00 | 0.00 |
| ATOM | 135 | CD   | ARG | 9  | -5.584 | 13.984 | -3.040 | 1.00 | 0.00 |
| ATOM | 136 | HD2  | ARG | 9  | -5.644 | 14.672 | -2.197 | 1.00 | 0.00 |
| ATOM | 137 | HD3  | ARG | 9  | -5.810 | 14.521 | -3.962 | 1.00 | 0.00 |
| ATOM | 138 | NE   | ARG | 9  | -6.579 | 12.930 | -2.856 | 1.00 | 0.00 |
| ATOM | 139 | HE   | ARG | 9  | -7.177 | 12.779 | -3.656 | 1.00 | 0.00 |
| ATOM | 140 | CZ   | ARG | 9  | -6.775 | 12.177 | -1.754 | 1.00 | 0.00 |
| ATOM | 141 | NH1  | ARG | 9  | -6.039 | 12.314 | -0.639 | 1.00 | 0.00 |
| ATOM | 142 | HH11 | ARG | 9  | -5.303 | 13.005 | -0.605 | 1.00 | 0.00 |
| ATOM | 143 | HH12 | ARG | 9  | -6.225 | 11.726 | 0.160  | 1.00 | 0.00 |
| ATOM | 144 | NH2  | ARG | 9  | -7.734 | 11.241 | -1.770 | 1.00 | 0.00 |
| ATOM | 145 | HH21 | ARG | 9  | -8.295 | 11.111 | -2.600 | 1.00 | 0.00 |
| ATOM | 146 | HH22 | ARG | 9  | -7.892 | 10.670 | -0.952 | 1.00 | 0.00 |
| ATOM | 147 | C    | ARG | 9  | -1.969 | 11.731 | -2.716 | 1.00 | 0.00 |
| ATOM | 148 | O    | ARG | 9  | -1.193 | 12.469 | -2.123 | 1.00 | 0.00 |
| ATOM | 149 | N    | GLN | 10 | -2.240 | 10.525 | -2.155 | 1.00 | 0.00 |
| ATOM | 150 | H    | GLN | 10 | -2.834 | 9.823  | -2.574 | 1.00 | 0.00 |
| ATOM | 151 | CA   | GLN | 10 | -1.693 | 10.266 | -0.846 | 1.00 | 0.00 |



|      |     |      |     |    |        |        |        |      |      |
|------|-----|------|-----|----|--------|--------|--------|------|------|
| ATOM | 152 | HA   | GLN | 10 | -1.932 | 11.074 | -0.155 | 1.00 | 0.00 |
| ATOM | 153 | CB   | GLN | 10 | -2.332 | 8.948  | -0.312 | 1.00 | 0.00 |
| ATOM | 154 | HB2  | GLN | 10 | -2.019 | 8.168  | -1.006 | 1.00 | 0.00 |
| ATOM | 155 | HB3  | GLN | 10 | -1.874 | 8.774  | 0.661  | 1.00 | 0.00 |
| ATOM | 156 | CG   | GLN | 10 | -3.830 | 8.923  | -0.173 | 1.00 | 0.00 |
| ATOM | 157 | HG2  | GLN | 10 | -3.946 | 9.517  | 0.734  | 1.00 | 0.00 |
| ATOM | 158 | HG3  | GLN | 10 | -4.316 | 9.433  | -1.005 | 1.00 | 0.00 |
| ATOM | 159 | CD   | GLN | 10 | -4.518 | 7.562  | 0.039  | 1.00 | 0.00 |
| ATOM | 160 | OE1  | GLN | 10 | -3.968 | 6.477  | -0.157 | 1.00 | 0.00 |
| ATOM | 161 | NE2  | GLN | 10 | -5.798 | 7.649  | 0.297  | 1.00 | 0.00 |
| ATOM | 162 | HE21 | GLN | 10 | -6.337 | 6.809  | 0.451  | 1.00 | 0.00 |
| ATOM | 163 | HE22 | GLN | 10 | -6.241 | 8.556  | 0.340  | 1.00 | 0.00 |
| ATOM | 164 | C    | GLN | 10 | -0.258 | 10.162 | -0.749 | 1.00 | 0.00 |
| ATOM | 165 | O    | GLN | 10 | 0.420  | 10.662 | 0.098  | 1.00 | 0.00 |
| ATOM | 166 | N    | LEU | 11 | 0.352  | 9.533  | -1.802 | 1.00 | 0.00 |
| ATOM | 167 | H    | LEU | 11 | -0.225 | 9.045  | -2.473 | 1.00 | 0.00 |
| ATOM | 168 | CA   | LEU | 11 | 1.765  | 9.401  | -1.905 | 1.00 | 0.00 |
| ATOM | 169 | HA   | LEU | 11 | 2.180  | 9.082  | -0.949 | 1.00 | 0.00 |
| ATOM | 170 | CB   | LEU | 11 | 2.123  | 8.349  | -2.973 | 1.00 | 0.00 |
| ATOM | 171 | HB2  | LEU | 11 | 1.504  | 7.484  | -2.735 | 1.00 | 0.00 |
| ATOM | 172 | HB3  | LEU | 11 | 1.836  | 8.743  | -3.948 | 1.00 | 0.00 |
| ATOM | 173 | CG   | LEU | 11 | 3.541  | 7.946  | -3.004 | 1.00 | 0.00 |

|      |     |      |     |    |       |        |        |      |      |
|------|-----|------|-----|----|-------|--------|--------|------|------|
| ATOM | 174 | HG   | LEU | 11 | 4.132 | 8.848  | -3.164 | 1.00 | 0.00 |
| ATOM | 175 | CD1  | LEU | 11 | 4.005 | 7.255  | -1.733 | 1.00 | 0.00 |
| ATOM | 176 | HD11 | LEU | 11 | 3.414 | 6.353  | -1.573 | 1.00 | 0.00 |
| ATOM | 177 | HD12 | LEU | 11 | 5.057 | 6.988  | -1.828 | 1.00 | 0.00 |
| ATOM | 178 | HD13 | LEU | 11 | 3.877 | 7.928  | -0.886 | 1.00 | 0.00 |
| ATOM | 179 | CD2  | LEU | 11 | 3.788 | 7.017  | -4.185 | 1.00 | 0.00 |
| ATOM | 180 | HD21 | LEU | 11 | 3.540 | 7.534  | -5.113 | 1.00 | 0.00 |
| ATOM | 181 | HD22 | LEU | 11 | 4.837 | 6.723  | -4.203 | 1.00 | 0.00 |
| ATOM | 182 | HD23 | LEU | 11 | 3.163 | 6.129  | -4.087 | 1.00 | 0.00 |
| ATOM | 183 | C    | LEU | 11 | 2.494 | 10.707 | -2.111 | 1.00 | 0.00 |
| ATOM | 184 | O    | LEU | 11 | 3.562 | 10.917 | -1.617 | 1.00 | 0.00 |
| ATOM | 185 | N    | ARG | 12 | 1.812 | 11.549 | -2.879 | 1.00 | 0.00 |
| ATOM | 186 | H    | ARG | 12 | 0.914 | 11.327 | -3.285 | 1.00 | 0.00 |
| ATOM | 187 | CA   | ARG | 12 | 2.413 | 12.898 | -3.170 | 1.00 | 0.00 |
| ATOM | 188 | HA   | ARG | 12 | 3.404 | 12.774 | -3.605 | 1.00 | 0.00 |
| ATOM | 189 | CB   | ARG | 12 | 1.565 | 13.652 | -4.130 | 1.00 | 0.00 |
| ATOM | 190 | HB2  | ARG | 12 | 1.602 | 13.146 | -5.095 | 1.00 | 0.00 |
| ATOM | 191 | HB3  | ARG | 12 | 0.540 | 13.652 | -3.760 | 1.00 | 0.00 |
| ATOM | 192 | CG   | ARG | 12 | 2.044 | 15.083 | -4.291 | 1.00 | 0.00 |
| ATOM | 193 | HG2  | ARG | 12 | 2.004 | 15.544 | -3.304 | 1.00 | 0.00 |
| ATOM | 194 | HG3  | ARG | 12 | 3.079 | 15.035 | -4.628 | 1.00 | 0.00 |
| ATOM | 195 | CD   | ARG | 12 | 1.238 | 15.907 | -5.263 | 1.00 | 0.00 |

|      |     |          |    |        |        |        |      |      |
|------|-----|----------|----|--------|--------|--------|------|------|
| ATOM | 196 | HD2 ARG  | 12 | 1.679  | 16.904 | -5.273 | 1.00 | 0.00 |
| ATOM | 197 | HD3 ARG  | 12 | 1.360  | 15.447 | -6.244 | 1.00 | 0.00 |
| ATOM | 198 | NE ARG   | 12 | -0.137 | 16.026 | -4.989 | 1.00 | 0.00 |
| ATOM | 199 | HE ARG   | 12 | -0.782 | 15.480 | -5.543 | 1.00 | 0.00 |
| ATOM | 200 | CZ ARG   | 12 | -0.610 | 16.729 | -3.997 | 1.00 | 0.00 |
| ATOM | 201 | NH1 ARG  | 12 | 0.196  | 17.422 | -3.236 | 1.00 | 0.00 |
| ATOM | 202 | HH11 ARG | 12 | 1.189  | 17.413 | -3.418 | 1.00 | 0.00 |
| ATOM | 203 | HH12 ARG | 12 | -0.179 | 17.964 | -2.470 | 1.00 | 0.00 |
| ATOM | 204 | NH2 ARG  | 12 | -1.848 | 16.822 | -3.825 | 1.00 | 0.00 |
| ATOM | 205 | HH21 ARG | 12 | -2.480 | 16.351 | -4.457 | 1.00 | 0.00 |
| ATOM | 206 | HH22 ARG | 12 | -2.209 | 17.368 | -3.055 | 1.00 | 0.00 |
| ATOM | 207 | C ARG    | 12 | 2.516  | 13.654 | -1.847 | 1.00 | 0.00 |
| ATOM | 208 | O ARG    | 12 | 3.530  | 14.256 | -1.633 | 1.00 | 0.00 |
| ATOM | 209 | N ASN    | 13 | 1.548  | 13.446 | -0.969 | 1.00 | 0.00 |
| ATOM | 210 | H ASN    | 13 | 0.699  | 12.984 | -1.262 | 1.00 | 0.00 |
| ATOM | 211 | CA ASN   | 13 | 1.561  | 14.143 | 0.393  | 1.00 | 0.00 |
| ATOM | 212 | HA ASN   | 13 | 1.968  | 15.150 | 0.294  | 1.00 | 0.00 |
| ATOM | 213 | CB ASN   | 13 | 0.185  | 14.240 | 0.923  | 1.00 | 0.00 |
| ATOM | 214 | HB2 ASN  | 13 | -0.364 | 13.301 | 0.850  | 1.00 | 0.00 |
| ATOM | 215 | HB3 ASN  | 13 | 0.306  | 14.509 | 1.972  | 1.00 | 0.00 |
| ATOM | 216 | CG ASN   | 13 | -0.606 | 15.308 | 0.246  | 1.00 | 0.00 |
| ATOM | 217 | OD1 ASN  | 13 | -0.388 | 16.466 | 0.504  | 1.00 | 0.00 |

|      |     |      |     |    |        |        |        |      |      |
|------|-----|------|-----|----|--------|--------|--------|------|------|
| ATOM | 218 | ND2  | ASN | 13 | -1.426 | 14.951 | -0.661 | 1.00 | 0.00 |
| ATOM | 219 | HD21 | ASN | 13 | -1.979 | 15.648 | -1.141 | 1.00 | 0.00 |
| ATOM | 220 | HD22 | ASN | 13 | -1.520 | 13.974 | -0.896 | 1.00 | 0.00 |
| ATOM | 221 | C    | ASN | 13 | 2.598  | 13.641 | 1.367  | 1.00 | 0.00 |
| ATOM | 222 | O    | ASN | 13 | 2.854  | 14.216 | 2.453  | 1.00 | 0.00 |
| ATOM | 223 | N    | VAL | 14 | 3.180  | 12.451 | 1.083  | 1.00 | 0.00 |
| ATOM | 224 | H    | VAL | 14 | 2.724  | 11.831 | 0.429  | 1.00 | 0.00 |
| ATOM | 225 | CA   | VAL | 14 | 4.313  | 12.001 | 1.732  | 1.00 | 0.00 |
| ATOM | 226 | HA   | VAL | 14 | 4.452  | 12.339 | 2.759  | 1.00 | 0.00 |
| ATOM | 227 | CB   | VAL | 14 | 4.363  | 10.408 | 1.709  | 1.00 | 0.00 |
| ATOM | 228 | HB   | VAL | 14 | 4.287  | 10.055 | 0.681  | 1.00 | 0.00 |
| ATOM | 229 | CG1  | VAL | 14 | 5.691  | 9.935  | 2.316  | 1.00 | 0.00 |
| ATOM | 230 | HG11 | VAL | 14 | 5.767  | 10.288 | 3.344  | 1.00 | 0.00 |
| ATOM | 231 | HG12 | VAL | 14 | 5.729  | 8.846  | 2.302  | 1.00 | 0.00 |
| ATOM | 232 | HG13 | VAL | 14 | 6.520  | 10.335 | 1.733  | 1.00 | 0.00 |
| ATOM | 233 | CG2  | VAL | 14 | 3.143  | 9.872  | 2.324  | 1.00 | 0.00 |
| ATOM | 234 | HG21 | VAL | 14 | 2.272  | 10.217 | 1.765  | 1.00 | 0.00 |
| ATOM | 235 | HG22 | VAL | 14 | 3.176  | 8.783  | 2.309  | 1.00 | 0.00 |
| ATOM | 236 | HG23 | VAL | 14 | 3.073  | 10.219 | 3.355  | 1.00 | 0.00 |
| ATOM | 237 | C    | VAL | 14 | 5.622  | 12.624 | 1.165  | 1.00 | 0.00 |
| ATOM | 238 | O    | VAL | 14 | 5.788  | 12.748 | -0.051 | 1.00 | 0.00 |
| ATOM | 239 | N    | SER | 15 | 6.567  | 13.007 | 2.035  | 1.00 | 0.00 |

|      |     |     |     |    |        |        |        |      |      |
|------|-----|-----|-----|----|--------|--------|--------|------|------|
| ATOM | 240 | H   | SER | 15 | 6.461  | 12.830 | 3.023  | 1.00 | 0.00 |
| ATOM | 241 | CA  | SER | 15 | 7.813  | 13.609 | 1.569  | 1.00 | 0.00 |
| ATOM | 242 | HA  | SER | 15 | 7.593  | 14.541 | 1.047  | 1.00 | 0.00 |
| ATOM | 243 | CB  | SER | 15 | 8.738  | 13.909 | 2.724  | 1.00 | 0.00 |
| ATOM | 244 | HB2 | SER | 15 | 8.984  | 13.023 | 3.309  | 1.00 | 0.00 |
| ATOM | 245 | HB3 | SER | 15 | 9.657  | 14.404 | 2.411  | 1.00 | 0.00 |
| ATOM | 246 | OG  | SER | 15 | 7.983  | 14.782 | 3.501  | 1.00 | 0.00 |
| ATOM | 247 | HG  | SER | 15 | 8.488  | 15.040 | 4.275  | 1.00 | 0.00 |
| ATOM | 248 | C   | SER | 15 | 8.572  | 12.694 | 0.731  | 1.00 | 0.00 |
| ATOM | 249 | O   | SER | 15 | 8.578  | 11.468 | 1.024  | 1.00 | 0.00 |
| ATOM | 250 | N   | PRO | 16 | 9.204  | 13.177 | -0.333 | 1.00 | 0.00 |
| ATOM | 251 | CD  | PRO | 16 | 9.145  | 14.580 | -0.912 | 1.00 | 0.00 |
| ATOM | 252 | HD2 | PRO | 16 | 9.607  | 15.281 | -0.217 | 1.00 | 0.00 |
| ATOM | 253 | HD3 | PRO | 16 | 8.105  | 14.864 | -1.075 | 1.00 | 0.00 |
| ATOM | 254 | CG  | PRO | 16 | 9.919  | 14.451 | -2.209 | 1.00 | 0.00 |
| ATOM | 255 | HG2 | PRO | 16 | 10.489 | 15.364 | -2.380 | 1.00 | 0.00 |
| ATOM | 256 | HG3 | PRO | 16 | 9.219  | 14.302 | -3.032 | 1.00 | 0.00 |
| ATOM | 257 | CB  | PRO | 16 | 10.807 | 13.282 | -2.053 | 1.00 | 0.00 |
| ATOM | 258 | HB2 | PRO | 16 | 11.725 | 13.516 | -1.515 | 1.00 | 0.00 |
| ATOM | 259 | HB3 | PRO | 16 | 11.054 | 12.843 | -3.020 | 1.00 | 0.00 |
| ATOM | 260 | CA  | PRO | 16 | 9.952  | 12.295 | -1.229 | 1.00 | 0.00 |
| ATOM | 261 | HA  | PRO | 16 | 9.223  | 11.814 | -1.881 | 1.00 | 0.00 |

|      |     |     |     |    |        |        |        |      |      |
|------|-----|-----|-----|----|--------|--------|--------|------|------|
| ATOM | 262 | C   | PRO | 16 | 10.786 | 11.225 | -0.519 | 1.00 | 0.00 |
| ATOM | 263 | O   | PRO | 16 | 10.730 | 10.022 | -0.843 | 1.00 | 0.00 |
| ATOM | 264 | N   | PHE | 17 | 11.536 | 11.627 | 0.496  | 1.00 | 0.00 |
| ATOM | 265 | H   | PHE | 17 | 11.560 | 12.597 | 0.778  | 1.00 | 0.00 |
| ATOM | 266 | CA  | PHE | 17 | 12.433 | 10.677 | 1.179  | 1.00 | 0.00 |
| ATOM | 267 | HA  | PHE | 17 | 13.002 | 10.121 | 0.434  | 1.00 | 0.00 |
| ATOM | 268 | CB  | PHE | 17 | 13.422 | 11.405 | 2.113  | 1.00 | 0.00 |
| ATOM | 269 | HB2 | PHE | 17 | 14.217 | 11.831 | 1.501  | 1.00 | 0.00 |
| ATOM | 270 | HB3 | PHE | 17 | 12.934 | 12.200 | 2.678  | 1.00 | 0.00 |
| ATOM | 271 | CG  | PHE | 17 | 14.099 | 10.491 | 3.137  | 1.00 | 0.00 |
| ATOM | 272 | CD1 | PHE | 17 | 15.080 | 9.559  | 2.732  | 1.00 | 0.00 |
| ATOM | 273 | HD1 | PHE | 17 | 15.376 | 9.513  | 1.684  | 1.00 | 0.00 |
| ATOM | 274 | CE1 | PHE | 17 | 15.672 | 8.697  | 3.667  | 1.00 | 0.00 |
| ATOM | 275 | HE1 | PHE | 17 | 16.429 | 7.982  | 3.346  | 1.00 | 0.00 |
| ATOM | 276 | CZ  | PHE | 17 | 15.289 | 8.755  | 5.015  | 1.00 | 0.00 |
| ATOM | 277 | HZ  | PHE | 17 | 15.755 | 8.085  | 5.737  | 1.00 | 0.00 |
| ATOM | 278 | CE2 | PHE | 17 | 14.317 | 9.665  | 5.434  | 1.00 | 0.00 |
| ATOM | 279 | HE2 | PHE | 17 | 14.019 | 9.707  | 6.482  | 1.00 | 0.00 |
| ATOM | 280 | CD2 | PHE | 17 | 13.725 | 10.524 | 4.505  | 1.00 | 0.00 |
| ATOM | 281 | HD2 | PHE | 17 | 12.963 | 11.234 | 4.827  | 1.00 | 0.00 |
| ATOM | 282 | C   | PHE | 17 | 11.663 | 9.598  | 1.959  | 1.00 | 0.00 |
| ATOM | 283 | O   | PHE | 17 | 12.240 | 8.555  | 2.268  | 1.00 | 0.00 |

|      |     |     |     |    |        |        |        |      |      |
|------|-----|-----|-----|----|--------|--------|--------|------|------|
| ATOM | 284 | N   | CYX | 18 | 10.406 | 9.860  | 2.284  | 1.00 | 0.00 |
| ATOM | 285 | H   | CYX | 18 | 10.000 | 10.725 | 1.956  | 1.00 | 0.00 |
| ATOM | 286 | CA  | CYX | 18 | 9.585  | 8.974  | 3.061  | 1.00 | 0.00 |
| ATOM | 287 | HA  | CYX | 18 | 10.239 | 8.330  | 3.648  | 1.00 | 0.00 |
| ATOM | 288 | CB  | CYX | 18 | 8.662  | 9.675  | 3.981  | 1.00 | 0.00 |
| ATOM | 289 | HB2 | CYX | 18 | 8.154  | 10.477 | 3.445  | 1.00 | 0.00 |
| ATOM | 290 | HB3 | CYX | 18 | 7.924  | 8.970  | 4.363  | 1.00 | 0.00 |
| ATOM | 291 | SG  | CYX | 18 | 9.710  | 10.390 | 5.366  | 1.00 | 0.00 |
| ATOM | 292 | C   | CYX | 18 | 8.687  | 8.102  | 2.107  | 1.00 | 0.00 |
| ATOM | 293 | O   | CYX | 18 | 7.961  | 7.278  | 2.669  | 1.00 | 0.00 |
| ATOM | 294 | N   | ARG | 19 | 8.729  | 8.286  | 0.771  | 1.00 | 0.00 |
| ATOM | 295 | H   | ARG | 19 | 9.427  | 8.852  | 0.311  | 1.00 | 0.00 |
| ATOM | 296 | CA  | ARG | 19 | 7.709  | 7.650  | -0.047 | 1.00 | 0.00 |
| ATOM | 297 | HA  | ARG | 19 | 6.740  | 7.819  | 0.423  | 1.00 | 0.00 |
| ATOM | 298 | CB  | ARG | 19 | 7.656  | 8.171  | -1.453 | 1.00 | 0.00 |
| ATOM | 299 | HB2 | ARG | 19 | 8.667  | 8.273  | -1.848 | 1.00 | 0.00 |
| ATOM | 300 | HB3 | ARG | 19 | 7.088  | 7.484  | -2.081 | 1.00 | 0.00 |
| ATOM | 301 | CG  | ARG | 19 | 6.969  | 9.544  | -1.448 | 1.00 | 0.00 |
| ATOM | 302 | HG2 | ARG | 19 | 5.932  | 9.373  | -1.157 | 1.00 | 0.00 |
| ATOM | 303 | HG3 | ARG | 19 | 7.467  | 10.139 | -0.683 | 1.00 | 0.00 |
| ATOM | 304 | CD  | ARG | 19 | 7.005  | 10.274 | -2.745 | 1.00 | 0.00 |
| ATOM | 305 | HD2 | ARG | 19 | 8.038  | 10.401 | -3.068 | 1.00 | 0.00 |

|      |     |      |     |    |        |        |        |      |      |
|------|-----|------|-----|----|--------|--------|--------|------|------|
| ATOM | 306 | HD3  | ARG | 19 | 6.455  | 9.712  | -3.500 | 1.00 | 0.00 |
| ATOM | 307 | NE   | ARG | 19 | 6.396  | 11.585 | -2.607 | 1.00 | 0.00 |
| ATOM | 308 | HE   | ARG | 19 | 5.701  | 11.669 | -1.879 | 1.00 | 0.00 |
| ATOM | 309 | CZ   | ARG | 19 | 6.704  | 12.657 | -3.308 | 1.00 | 0.00 |
| ATOM | 310 | NH1  | ARG | 19 | 7.652  | 12.627 | -4.232 | 1.00 | 0.00 |
| ATOM | 311 | HH11 | ARG | 19 | 8.153  | 11.769 | -4.409 | 1.00 | 0.00 |
| ATOM | 312 | HH12 | ARG | 19 | 7.869  | 13.463 | -4.756 | 1.00 | 0.00 |
| ATOM | 313 | NH2  | ARG | 19 | 5.994  | 13.789 | -3.104 | 1.00 | 0.00 |
| ATOM | 314 | HH21 | ARG | 19 | 5.246  | 13.797 | -2.425 | 1.00 | 0.00 |
| ATOM | 315 | HH22 | ARG | 19 | 6.214  | 14.622 | -3.632 | 1.00 | 0.00 |
| ATOM | 316 | C    | ARG | 19 | 8.003  | 6.128  | -0.095 | 1.00 | 0.00 |
| ATOM | 317 | O    | ARG | 19 | 7.093  | 5.379  | 0.093  | 1.00 | 0.00 |
| ATOM | 318 | N    | CYX | 20 | 9.271  | 5.813  | -0.265 | 1.00 | 0.00 |
| ATOM | 319 | H    | CYX | 20 | 9.971  | 6.506  | -0.489 | 1.00 | 0.00 |
| ATOM | 320 | CA   | CYX | 20 | 9.651  | 4.338  | -0.375 | 1.00 | 0.00 |
| ATOM | 321 | HA   | CYX | 20 | 8.905  | 3.844  | -0.999 | 1.00 | 0.00 |
| ATOM | 322 | CB   | CYX | 20 | 11.015 | 4.097  | -0.972 | 1.00 | 0.00 |
| ATOM | 323 | HB2  | CYX | 20 | 11.764 | 4.646  | -0.401 | 1.00 | 0.00 |
| ATOM | 324 | HB3  | CYX | 20 | 11.243 | 3.032  | -0.941 | 1.00 | 0.00 |
| ATOM | 325 | SG   | CYX | 20 | 11.033 | 4.464  | -2.734 | 1.00 | 0.00 |
| ATOM | 326 | C    | CYX | 20 | 9.405  | 3.628  | 0.942  | 1.00 | 0.00 |
| ATOM | 327 | O    | CYX | 20 | 8.750  | 2.580  | 0.964  | 1.00 | 0.00 |



|      |     |     |     |    |        |       |       |      |      |
|------|-----|-----|-----|----|--------|-------|-------|------|------|
| ATOM | 328 | N   | PRO | 21 | 9.841  | 4.183 | 2.073 | 1.00 | 0.00 |
| ATOM | 329 | CD  | PRO | 21 | 10.930 | 5.160 | 2.240 | 1.00 | 0.00 |
| ATOM | 330 | HD2 | PRO | 21 | 10.605 | 6.132 | 1.866 | 1.00 | 0.00 |
| ATOM | 331 | HD3 | PRO | 21 | 11.803 | 4.829 | 1.678 | 1.00 | 0.00 |
| ATOM | 332 | CG  | PRO | 21 | 11.166 | 5.163 | 3.698 | 1.00 | 0.00 |
| ATOM | 333 | HG2 | PRO | 21 | 11.390 | 6.187 | 3.998 | 1.00 | 0.00 |
| ATOM | 334 | HG3 | PRO | 21 | 12.029 | 4.529 | 3.898 | 1.00 | 0.00 |
| ATOM | 335 | CB  | PRO | 21 | 10.016 | 4.673 | 4.356 | 1.00 | 0.00 |
| ATOM | 336 | HB2 | PRO | 21 | 9.285  | 5.458 | 4.551 | 1.00 | 0.00 |
| ATOM | 337 | HB3 | PRO | 21 | 10.272 | 4.175 | 5.291 | 1.00 | 0.00 |
| ATOM | 338 | CA  | PRO | 21 | 9.433  | 3.650 | 3.357 | 1.00 | 0.00 |
| ATOM | 339 | HA  | PRO | 21 | 9.905  | 2.672 | 3.449 | 1.00 | 0.00 |
| ATOM | 340 | C   | PRO | 21 | 7.953  | 3.511 | 3.555 | 1.00 | 0.00 |
| ATOM | 341 | O   | PRO | 21 | 7.469  | 2.475 | 4.093 | 1.00 | 0.00 |
| ATOM | 342 | N   | SER | 22 | 7.140  | 4.478 | 3.091 | 1.00 | 0.00 |
| ATOM | 343 | H   | SER | 22 | 7.525  | 5.286 | 2.622 | 1.00 | 0.00 |
| ATOM | 344 | CA  | SER | 22 | 5.775  | 4.437 | 3.313 | 1.00 | 0.00 |
| ATOM | 345 | HA  | SER | 22 | 5.590  | 4.153 | 4.349 | 1.00 | 0.00 |
| ATOM | 346 | CB  | SER | 22 | 5.111  | 5.798 | 3.051 | 1.00 | 0.00 |
| ATOM | 347 | HB2 | SER | 22 | 5.393  | 6.200 | 2.077 | 1.00 | 0.00 |
| ATOM | 348 | HB3 | SER | 22 | 4.025  | 5.732 | 3.115 | 1.00 | 0.00 |
| ATOM | 349 | OG  | SER | 22 | 5.586  | 6.642 | 4.058 | 1.00 | 0.00 |

|      |     |      |     |    |       |        |        |      |      |
|------|-----|------|-----|----|-------|--------|--------|------|------|
| ATOM | 350 | HG   | SER | 22 | 5.204 | 7.517  | 3.949  | 1.00 | 0.00 |
| ATOM | 351 | C    | SER | 22 | 5.071 | 3.314  | 2.447  | 1.00 | 0.00 |
| ATOM | 352 | O    | SER | 22 | 4.134 | 2.746  | 2.892  | 1.00 | 0.00 |
| ATOM | 353 | N    | LEU | 23 | 5.587 | 3.181  | 1.249  | 1.00 | 0.00 |
| ATOM | 354 | H    | LEU | 23 | 6.328 | 3.805  | 0.961  | 1.00 | 0.00 |
| ATOM | 355 | CA   | LEU | 23 | 5.105 | 2.175  | 0.283  | 1.00 | 0.00 |
| ATOM | 356 | HA   | LEU | 23 | 4.026 | 2.298  | 0.188  | 1.00 | 0.00 |
| ATOM | 357 | CB   | LEU | 23 | 5.721 | 2.271  | -1.083 | 1.00 | 0.00 |
| ATOM | 358 | HB2  | LEU | 23 | 6.728 | 2.649  | -0.909 | 1.00 | 0.00 |
| ATOM | 359 | HB3  | LEU | 23 | 5.775 | 1.338  | -1.643 | 1.00 | 0.00 |
| ATOM | 360 | CG   | LEU | 23 | 4.916 | 3.308  | -1.891 | 1.00 | 0.00 |
| ATOM | 361 | HG   | LEU | 23 | 4.767 | 4.221  | -1.314 | 1.00 | 0.00 |
| ATOM | 362 | CD1  | LEU | 23 | 5.715 | 3.615  | -3.104 | 1.00 | 0.00 |
| ATOM | 363 | HD11 | LEU | 23 | 5.863 | 2.703  | -3.682 | 1.00 | 0.00 |
| ATOM | 364 | HD12 | LEU | 23 | 5.185 | 4.348  | -3.713 | 1.00 | 0.00 |
| ATOM | 365 | HD13 | LEU | 23 | 6.683 | 4.020  | -2.809 | 1.00 | 0.00 |
| ATOM | 366 | CD2  | LEU | 23 | 3.536 | 2.877  | -2.164 | 1.00 | 0.00 |
| ATOM | 367 | HD21 | LEU | 23 | 3.013 | 2.713  | -1.222 | 1.00 | 0.00 |
| ATOM | 368 | HD22 | LEU | 23 | 3.020 | 3.649  | -2.736 | 1.00 | 0.00 |
| ATOM | 369 | HD23 | LEU | 23 | 3.551 | 1.950  | -2.737 | 1.00 | 0.00 |
| ATOM | 370 | C    | LEU | 23 | 5.437 | 0.811  | 0.945  | 1.00 | 0.00 |
| ATOM | 371 | O    | LEU | 23 | 4.613 | -0.081 | 0.764  | 1.00 | 0.00 |

|      |     |      |     |    |        |        |       |      |      |
|------|-----|------|-----|----|--------|--------|-------|------|------|
| ATOM | 372 | N    | ARG | 24 | 6.598  | 0.650  | 1.509 | 1.00 | 0.00 |
| ATOM | 373 | H    | ARG | 24 | 7.290  | 1.385  | 1.536 | 1.00 | 0.00 |
| ATOM | 374 | CA   | ARG | 24 | 6.900  | -0.649 | 2.228 | 1.00 | 0.00 |
| ATOM | 375 | HA   | ARG | 24 | 6.941  | -1.469 | 1.512 | 1.00 | 0.00 |
| ATOM | 376 | CB   | ARG | 24 | 8.216  | -0.557 | 2.925 | 1.00 | 0.00 |
| ATOM | 377 | HB2  | ARG | 24 | 8.993  | -0.432 | 2.171 | 1.00 | 0.00 |
| ATOM | 378 | HB3  | ARG | 24 | 8.198  | 0.318  | 3.575 | 1.00 | 0.00 |
| ATOM | 379 | CG   | ARG | 24 | 8.510  | -1.811 | 3.762 | 1.00 | 0.00 |
| ATOM | 380 | HG2  | ARG | 24 | 7.746  | -1.905 | 4.533 | 1.00 | 0.00 |
| ATOM | 381 | HG3  | ARG | 24 | 8.477  | -2.684 | 3.110 | 1.00 | 0.00 |
| ATOM | 382 | CD   | ARG | 24 | 9.879  | -1.718 | 4.414 | 1.00 | 0.00 |
| ATOM | 383 | HD2  | ARG | 24 | 9.865  | -0.855 | 5.080 | 1.00 | 0.00 |
| ATOM | 384 | HD3  | ARG | 24 | 10.024 | -2.626 | 4.999 | 1.00 | 0.00 |
| ATOM | 385 | NE   | ARG | 24 | 10.998 | -1.575 | 3.487 | 1.00 | 0.00 |
| ATOM | 386 | HE   | ARG | 24 | 11.276 | -0.630 | 3.261 | 1.00 | 0.00 |
| ATOM | 387 | CZ   | ARG | 24 | 11.685 | -2.591 | 2.945 | 1.00 | 0.00 |
| ATOM | 388 | NH1  | ARG | 24 | 11.346 | -3.882 | 3.152 | 1.00 | 0.00 |
| ATOM | 389 | HH11 | ARG | 24 | 10.550 | -4.105 | 3.732 | 1.00 | 0.00 |
| ATOM | 390 | HH12 | ARG | 24 | 11.889 | -4.618 | 2.725 | 1.00 | 0.00 |
| ATOM | 391 | NH2  | ARG | 24 | 12.724 | -2.304 | 2.152 | 1.00 | 0.00 |
| ATOM | 392 | HH21 | ARG | 24 | 12.970 | -1.340 | 1.977 | 1.00 | 0.00 |
| ATOM | 393 | HH22 | ARG | 24 | 13.256 | -3.052 | 1.732 | 1.00 | 0.00 |

|      |     |      |     |    |       |        |        |      |      |
|------|-----|------|-----|----|-------|--------|--------|------|------|
| ATOM | 394 | C    | ARG | 24 | 5.845 | -0.873 | 3.329  | 1.00 | 0.00 |
| ATOM | 395 | O    | ARG | 24 | 5.273 | -2.010 | 3.500  | 1.00 | 0.00 |
| ATOM | 396 | N    | GLN | 25 | 5.539 | 0.151  | 4.125  | 1.00 | 0.00 |
| ATOM | 397 | H    | GLN | 25 | 6.059 | 1.017  | 4.117  | 1.00 | 0.00 |
| ATOM | 398 | CA   | GLN | 25 | 4.450 | -0.005 | 5.119  | 1.00 | 0.00 |
| ATOM | 399 | HA   | GLN | 25 | 4.651 | -0.870 | 5.751  | 1.00 | 0.00 |
| ATOM | 400 | CB   | GLN | 25 | 4.342 | 1.255  | 6.022  | 1.00 | 0.00 |
| ATOM | 401 | HB2  | GLN | 25 | 4.124 | 2.118  | 5.392  | 1.00 | 0.00 |
| ATOM | 402 | HB3  | GLN | 25 | 3.526 | 1.108  | 6.729  | 1.00 | 0.00 |
| ATOM | 403 | CG   | GLN | 25 | 5.645 | 1.500  | 6.790  | 1.00 | 0.00 |
| ATOM | 404 | HG2  | GLN | 25 | 6.047 | 0.530  | 7.082  | 1.00 | 0.00 |
| ATOM | 405 | HG3  | GLN | 25 | 6.363 | 2.013  | 6.149  | 1.00 | 0.00 |
| ATOM | 406 | CD   | GLN | 25 | 5.429 | 2.339  | 8.051  | 1.00 | 0.00 |
| ATOM | 407 | OE1  | GLN | 25 | 5.290 | 3.585  | 8.003  | 1.00 | 0.00 |
| ATOM | 408 | NE2  | GLN | 25 | 5.427 | 1.660  | 9.200  | 1.00 | 0.00 |
| ATOM | 409 | HE21 | GLN | 25 | 5.289 | 2.150  | 10.072 | 1.00 | 0.00 |
| ATOM | 410 | HE22 | GLN | 25 | 5.562 | 0.660  | 9.192  | 1.00 | 0.00 |
| ATOM | 411 | C    | GLN | 25 | 3.089 | -0.296 | 4.553  | 1.00 | 0.00 |
| ATOM | 412 | O    | GLN | 25 | 2.281 | -1.063 | 5.071  | 1.00 | 0.00 |
| ATOM | 413 | N    | ALA | 26 | 2.768 | 0.234  | 3.325  | 1.00 | 0.00 |
| ATOM | 414 | H    | ALA | 26 | 3.400 | 0.880  | 2.873  | 1.00 | 0.00 |
| ATOM | 415 | CA   | ALA | 26 | 1.567 | -0.093 | 2.668  | 1.00 | 0.00 |

|      |     |      |     |    |       |        |        |      |      |
|------|-----|------|-----|----|-------|--------|--------|------|------|
| ATOM | 416 | HA   | ALA | 26 | 0.739 | 0.136  | 3.339  | 1.00 | 0.00 |
| ATOM | 417 | CB   | ALA | 26 | 1.434 | 0.758  | 1.431  | 1.00 | 0.00 |
| ATOM | 418 | HB1  | ALA | 26 | 2.251 | 0.534  | 0.745  | 1.00 | 0.00 |
| ATOM | 419 | HB2  | ALA | 26 | 0.482 | 0.545  | 0.943  | 1.00 | 0.00 |
| ATOM | 420 | HB3  | ALA | 26 | 1.472 | 1.812  | 1.708  | 1.00 | 0.00 |
| ATOM | 421 | C    | ALA | 26 | 1.455 | -1.597 | 2.214  | 1.00 | 0.00 |
| ATOM | 422 | O    | ALA | 26 | 0.327 | -2.079 | 2.241  | 1.00 | 0.00 |
| ATOM | 423 | N    | VAL | 27 | 2.554 | -2.093 | 1.766  | 1.00 | 0.00 |
| ATOM | 424 | H    | VAL | 27 | 3.370 | -1.501 | 1.700  | 1.00 | 0.00 |
| ATOM | 425 | CA   | VAL | 27 | 2.674 | -3.555 | 1.306  | 1.00 | 0.00 |
| ATOM | 426 | HA   | VAL | 27 | 1.899 | -3.684 | 0.550  | 1.00 | 0.00 |
| ATOM | 427 | CB   | VAL | 27 | 3.980 | -3.961 | 0.722  | 1.00 | 0.00 |
| ATOM | 428 | HB   | VAL | 27 | 4.783 | -3.702 | 1.411  | 1.00 | 0.00 |
| ATOM | 429 | CG1  | VAL | 27 | 3.982 | -5.479 | 0.480  | 1.00 | 0.00 |
| ATOM | 430 | HG11 | VAL | 27 | 3.179 | -5.738 | -0.210 | 1.00 | 0.00 |
| ATOM | 431 | HG12 | VAL | 27 | 4.938 | -5.778 | 0.052  | 1.00 | 0.00 |
| ATOM | 432 | HG13 | VAL | 27 | 3.829 | -5.998 | 1.426  | 1.00 | 0.00 |
| ATOM | 433 | CG2  | VAL | 27 | 4.259 | -3.300 | -0.656 | 1.00 | 0.00 |
| ATOM | 434 | HG21 | VAL | 27 | 4.269 | -2.215 | -0.544 | 1.00 | 0.00 |
| ATOM | 435 | HG22 | VAL | 27 | 5.226 | -3.635 | -1.031 | 1.00 | 0.00 |
| ATOM | 436 | HG23 | VAL | 27 | 3.478 | -3.585 | -1.361 | 1.00 | 0.00 |
| ATOM | 437 | C    | VAL | 27 | 2.401 | -4.381 | 2.581  | 1.00 | 0.00 |

|      |     |      |     |    |        |        |       |      |      |
|------|-----|------|-----|----|--------|--------|-------|------|------|
| ATOM | 438 | O    | VAL | 27 | 1.500  | -5.255 | 2.545 | 1.00 | 0.00 |
| ATOM | 439 | N    | GLN | 28 | 3.033  | -4.020 | 3.700 | 1.00 | 0.00 |
| ATOM | 440 | H    | GLN | 28 | 3.737  | -3.296 | 3.694 | 1.00 | 0.00 |
| ATOM | 441 | CA   | GLN | 28 | 2.797  | -4.757 | 4.958 | 1.00 | 0.00 |
| ATOM | 442 | HA   | GLN | 28 | 2.991  | -5.820 | 4.820 | 1.00 | 0.00 |
| ATOM | 443 | CB   | GLN | 28 | 3.724  | -4.234 | 6.009 | 1.00 | 0.00 |
| ATOM | 444 | HB2  | GLN | 28 | 3.601  | -3.151 | 6.047 | 1.00 | 0.00 |
| ATOM | 445 | HB3  | GLN | 28 | 3.419  | -4.667 | 6.962 | 1.00 | 0.00 |
| ATOM | 446 | CG   | GLN | 28 | 5.118  | -4.555 | 5.755 | 1.00 | 0.00 |
| ATOM | 447 | HG2  | GLN | 28 | 5.282  | -5.607 | 5.987 | 1.00 | 0.00 |
| ATOM | 448 | HG3  | GLN | 28 | 5.369  | -4.370 | 4.710 | 1.00 | 0.00 |
| ATOM | 449 | CD   | GLN | 28 | 6.040  | -3.710 | 6.636 | 1.00 | 0.00 |
| ATOM | 450 | OE1  | GLN | 28 | 5.575  | -2.928 | 7.449 | 1.00 | 0.00 |
| ATOM | 451 | NE2  | GLN | 28 | 7.335  | -3.856 | 6.453 | 1.00 | 0.00 |
| ATOM | 452 | HE21 | GLN | 28 | 7.984  | -3.320 | 7.010 | 1.00 | 0.00 |
| ATOM | 453 | HE22 | GLN | 28 | 7.673  | -4.503 | 5.755 | 1.00 | 0.00 |
| ATOM | 454 | C    | GLN | 28 | 1.372  | -4.678 | 5.339 | 1.00 | 0.00 |
| ATOM | 455 | O    | GLN | 28 | 0.728  | -5.658 | 5.786 | 1.00 | 0.00 |
| ATOM | 456 | N    | SER | 29 | 0.774  | -3.470 | 5.336 | 1.00 | 0.00 |
| ATOM | 457 | H    | SER | 29 | 1.307  | -2.636 | 5.135 | 1.00 | 0.00 |
| ATOM | 458 | CA   | SER | 29 | -0.608 | -3.326 | 5.668 | 1.00 | 0.00 |
| ATOM | 459 | HA   | SER | 29 | -0.817 | -3.757 | 6.647 | 1.00 | 0.00 |

|      |     |     |     |    |        |        |       |      |      |
|------|-----|-----|-----|----|--------|--------|-------|------|------|
| ATOM | 460 | CB  | SER | 29 | -0.943 | -1.847 | 5.708 | 1.00 | 0.00 |
| ATOM | 461 | HB2 | SER | 29 | -0.737 | -1.386 | 4.742 | 1.00 | 0.00 |
| ATOM | 462 | HB3 | SER | 29 | -1.994 | -1.703 | 5.962 | 1.00 | 0.00 |
| ATOM | 463 | OG  | SER | 29 | -0.142 | -1.254 | 6.687 | 1.00 | 0.00 |
| ATOM | 464 | HG  | SER | 29 | -0.335 | -0.314 | 6.732 | 1.00 | 0.00 |
| ATOM | 465 | C   | SER | 29 | -1.618 | -3.995 | 4.783 | 1.00 | 0.00 |
| ATOM | 466 | O   | SER | 29 | -2.708 | -4.441 | 5.216 | 1.00 | 0.00 |
| ATOM | 467 | N   | ALA | 30 | -1.309 | -4.015 | 3.478 | 1.00 | 0.00 |
| ATOM | 468 | H   | ALA | 30 | -0.523 | -3.492 | 3.120 | 1.00 | 0.00 |
| ATOM | 469 | CA  | ALA | 30 | -2.147 | -4.704 | 2.544 | 1.00 | 0.00 |
| ATOM | 470 | HA  | ALA | 30 | -3.157 | -4.312 | 2.667 | 1.00 | 0.00 |
| ATOM | 471 | CB  | ALA | 30 | -1.692 | -4.432 | 1.127 | 1.00 | 0.00 |
| ATOM | 472 | HB1 | ALA | 30 | -0.686 | -4.827 | 0.986 | 1.00 | 0.00 |
| ATOM | 473 | HB2 | ALA | 30 | -2.374 | -4.915 | 0.427 | 1.00 | 0.00 |
| ATOM | 474 | HB3 | ALA | 30 | -1.689 | -3.357 | 0.946 | 1.00 | 0.00 |
| ATOM | 475 | C   | ALA | 30 | -2.210 | -6.208 | 2.819 | 1.00 | 0.00 |
| ATOM | 476 | O   | ALA | 30 | -3.207 | -6.807 | 2.601 | 1.00 | 0.00 |
| ATOM | 477 | N   | GLN | 31 | -1.152 | -6.746 | 3.312 | 1.00 | 0.00 |
| ATOM | 478 | H   | GLN | 31 | -0.310 | -6.204 | 3.442 | 1.00 | 0.00 |
| ATOM | 479 | CA  | GLN | 31 | -1.137 | -8.203 | 3.713 | 1.00 | 0.00 |
| ATOM | 480 | HA  | GLN | 31 | -1.381 | -8.830 | 2.855 | 1.00 | 0.00 |
| ATOM | 481 | CB  | GLN | 31 | 0.195  | -8.572 | 4.200 | 1.00 | 0.00 |

|      |     |      |     |    |        |         |       |      |      |
|------|-----|------|-----|----|--------|---------|-------|------|------|
| ATOM | 482 | HB2  | GLN | 31 | 0.459  | -7.909  | 5.024 | 1.00 | 0.00 |
| ATOM | 483 | HB3  | GLN | 31 | 0.161  | -9.601  | 4.558 | 1.00 | 0.00 |
| ATOM | 484 | CG   | GLN | 31 | 1.206  | -8.456  | 3.132 | 1.00 | 0.00 |
| ATOM | 485 | HG2  | GLN | 31 | 0.877  | -9.105  | 2.320 | 1.00 | 0.00 |
| ATOM | 486 | HG3  | GLN | 31 | 1.240  | -7.424  | 2.780 | 1.00 | 0.00 |
| ATOM | 487 | CD   | GLN | 31 | 2.574  | -8.864  | 3.541 | 1.00 | 0.00 |
| ATOM | 488 | OE1  | GLN | 31 | 3.532  | -8.123  | 3.441 | 1.00 | 0.00 |
| ATOM | 489 | NE2  | GLN | 31 | 2.673  | -10.094 | 3.984 | 1.00 | 0.00 |
| ATOM | 490 | HE21 | GLN | 31 | 3.570  | -10.449 | 4.282 | 1.00 | 0.00 |
| ATOM | 491 | HE22 | GLN | 31 | 1.851  | -10.680 | 4.025 | 1.00 | 0.00 |
| ATOM | 492 | C    | GLN | 31 | -2.126 | -8.517  | 4.811 | 1.00 | 0.00 |
| ATOM | 493 | O    | GLN | 31 | -2.658 | -9.599  | 4.843 | 1.00 | 0.00 |
| ATOM | 494 | N    | GLN | 32 | -2.415 | -7.570  | 5.686 | 1.00 | 0.00 |
| ATOM | 495 | H    | GLN | 32 | -1.936 | -6.681  | 5.652 | 1.00 | 0.00 |
| ATOM | 496 | CA   | GLN | 32 | -3.397 | -7.779  | 6.724 | 1.00 | 0.00 |
| ATOM | 497 | HA   | GLN | 32 | -3.189 | -8.710  | 7.251 | 1.00 | 0.00 |
| ATOM | 498 | CB   | GLN | 32 | -3.353 | -6.623  | 7.733 | 1.00 | 0.00 |
| ATOM | 499 | HB2  | GLN | 32 | -3.486 | -5.688  | 7.188 | 1.00 | 0.00 |
| ATOM | 500 | HB3  | GLN | 32 | -4.175 | -6.752  | 8.437 | 1.00 | 0.00 |
| ATOM | 501 | CG   | GLN | 32 | -2.048 | -6.584  | 8.486 | 1.00 | 0.00 |
| ATOM | 502 | HG2  | GLN | 32 | -1.522 | -7.535  | 8.412 | 1.00 | 0.00 |
| ATOM | 503 | HG3  | GLN | 32 | -1.427 | -5.792  | 8.067 | 1.00 | 0.00 |



|      |     |      |     |    |        |        |        |      |      |
|------|-----|------|-----|----|--------|--------|--------|------|------|
| ATOM | 504 | CD   | GLN | 32 | -2.296 | -6.283 | 9.938  | 1.00 | 0.00 |
| ATOM | 505 | OE1  | GLN | 32 | -2.643 | -5.158 | 10.301 | 1.00 | 0.00 |
| ATOM | 506 | NE2  | GLN | 32 | -2.151 | -7.294 | 10.773 | 1.00 | 0.00 |
| ATOM | 507 | HE21 | GLN | 32 | -2.304 | -7.154 | 11.761 | 1.00 | 0.00 |
| ATOM | 508 | HE22 | GLN | 32 | -1.888 | -8.203 | 10.420 | 1.00 | 0.00 |
| ATOM | 509 | C    | GLN | 32 | -4.807 | -7.892 | 6.248  | 1.00 | 0.00 |
| ATOM | 510 | O    | GLN | 32 | -5.639 | -8.553 | 6.893  | 1.00 | 0.00 |
| ATOM | 511 | N    | GLN | 33 | -5.096 | -7.262 | 5.122  | 1.00 | 0.00 |
| ATOM | 512 | H    | GLN | 33 | -4.408 | -6.662 | 4.690  | 1.00 | 0.00 |
| ATOM | 513 | CA   | GLN | 33 | -6.402 | -7.354 | 4.513  | 1.00 | 0.00 |
| ATOM | 514 | HA   | GLN | 33 | -7.182 | -7.337 | 5.274  | 1.00 | 0.00 |
| ATOM | 515 | CB   | GLN | 33 | -6.602 | -6.151 | 3.579  | 1.00 | 0.00 |
| ATOM | 516 | HB2  | GLN | 33 | -6.007 | -6.336 | 2.684  | 1.00 | 0.00 |
| ATOM | 517 | HB3  | GLN | 33 | -7.659 | -6.123 | 3.312  | 1.00 | 0.00 |
| ATOM | 518 | CG   | GLN | 33 | -6.192 | -4.797 | 4.199  | 1.00 | 0.00 |
| ATOM | 519 | HG2  | GLN | 33 | -6.595 | -4.711 | 5.208  | 1.00 | 0.00 |
| ATOM | 520 | HG3  | GLN | 33 | -5.103 | -4.769 | 4.239  | 1.00 | 0.00 |
| ATOM | 521 | CD   | GLN | 33 | -6.676 | -3.619 | 3.384  | 1.00 | 0.00 |
| ATOM | 522 | OE1  | GLN | 33 | -5.959 | -3.084 | 2.518  | 1.00 | 0.00 |
| ATOM | 523 | NE2  | GLN | 33 | -7.921 | -3.221 | 3.634  | 1.00 | 0.00 |
| ATOM | 524 | HE21 | GLN | 33 | -8.310 | -2.439 | 3.126  | 1.00 | 0.00 |
| ATOM | 525 | HE22 | GLN | 33 | -8.472 | -3.702 | 4.330  | 1.00 | 0.00 |

|      |     |      |     |    |        |         |        |      |      |
|------|-----|------|-----|----|--------|---------|--------|------|------|
| ATOM | 526 | C    | GLN | 33 | -6.555 | -8.691  | 3.757  | 1.00 | 0.00 |
| ATOM | 527 | O    | GLN | 33 | -7.571 | -8.923  | 3.144  | 1.00 | 0.00 |
| ATOM | 528 | N    | GLN | 34 | -5.515 | -9.519  | 3.723  | 1.00 | 0.00 |
| ATOM | 529 | H    | GLN | 34 | -4.658 | -9.250  | 4.184  | 1.00 | 0.00 |
| ATOM | 530 | CA   | GLN | 34 | -5.553 | -10.808 | 3.023  | 1.00 | 0.00 |
| ATOM | 531 | HA   | GLN | 34 | -6.534 | -10.975 | 2.577  | 1.00 | 0.00 |
| ATOM | 532 | CB   | GLN | 34 | -4.498 | -10.793 | 1.900  | 1.00 | 0.00 |
| ATOM | 533 | HB2  | GLN | 34 | -3.520 | -10.719 | 2.375  | 1.00 | 0.00 |
| ATOM | 534 | HB3  | GLN | 34 | -4.574 | -11.743 | 1.371  | 1.00 | 0.00 |
| ATOM | 535 | CG   | GLN | 34 | -4.668 | -9.656  | 0.920  | 1.00 | 0.00 |
| ATOM | 536 | HG2  | GLN | 34 | -5.673 | -9.679  | 0.498  | 1.00 | 0.00 |
| ATOM | 537 | HG3  | GLN | 34 | -4.531 | -8.730  | 1.479  | 1.00 | 0.00 |
| ATOM | 538 | CD   | GLN | 34 | -3.669 | -9.689  | -0.211 | 1.00 | 0.00 |
| ATOM | 539 | OE1  | GLN | 34 | -3.785 | -10.473 | -1.152 | 1.00 | 0.00 |
| ATOM | 540 | NE2  | GLN | 34 | -2.702 | -8.808  | -0.138 | 1.00 | 0.00 |
| ATOM | 541 | HE21 | GLN | 34 | -1.999 | -8.774  | -0.862 | 1.00 | 0.00 |
| ATOM | 542 | HE22 | GLN | 34 | -2.665 | -8.167  | 0.641  | 1.00 | 0.00 |
| ATOM | 543 | C    | GLN | 34 | -5.287 | -12.041 | 3.861  | 1.00 | 0.00 |
| ATOM | 544 | O    | GLN | 34 | -5.707 | -13.138 | 3.474  | 1.00 | 0.00 |
| ATOM | 545 | N    | GLY | 35 | -4.520 | -11.926 | 4.941  | 1.00 | 0.00 |
| ATOM | 546 | H    | GLY | 35 | -4.267 | -11.023 | 5.316  | 1.00 | 0.00 |
| ATOM | 547 | CA   | GLY | 35 | -4.018 | -13.128 | 5.620  | 1.00 | 0.00 |

|      |     |      |     |    |        |         |       |      |      |
|------|-----|------|-----|----|--------|---------|-------|------|------|
| ATOM | 548 | HA2  | GLY | 35 | -3.443 | -12.833 | 6.497 | 1.00 | 0.00 |
| ATOM | 549 | HA3  | GLY | 35 | -4.861 | -13.746 | 5.929 | 1.00 | 0.00 |
| ATOM | 550 | C    | GLY | 35 | -3.120 | -13.942 | 4.687 | 1.00 | 0.00 |
| ATOM | 551 | O    | GLY | 35 | -2.428 | -13.359 | 3.862 | 1.00 | 0.00 |
| ATOM | 552 | N    | GLN | 36 | -3.166 | -15.272 | 4.787 | 1.00 | 0.00 |
| ATOM | 553 | H    | GLN | 36 | -3.920 | -15.698 | 5.307 | 1.00 | 0.00 |
| ATOM | 554 | CA   | GLN | 36 | -2.089 | -16.142 | 4.276 | 1.00 | 0.00 |
| ATOM | 555 | HA   | GLN | 36 | -1.176 | -15.924 | 4.829 | 1.00 | 0.00 |
| ATOM | 556 | CB   | GLN | 36 | -2.410 | -17.656 | 4.424 | 1.00 | 0.00 |
| ATOM | 557 | HB2  | GLN | 36 | -3.490 | -17.729 | 4.552 | 1.00 | 0.00 |
| ATOM | 558 | HB3  | GLN | 36 | -2.124 | -18.123 | 3.482 | 1.00 | 0.00 |
| ATOM | 559 | CG   | GLN | 36 | -1.709 | -18.372 | 5.583 | 1.00 | 0.00 |
| ATOM | 560 | HG2  | GLN | 36 | -1.975 | -17.885 | 6.521 | 1.00 | 0.00 |
| ATOM | 561 | HG3  | GLN | 36 | -2.053 | -19.406 | 5.600 | 1.00 | 0.00 |
| ATOM | 562 | CD   | GLN | 36 | -0.194 | -18.366 | 5.444 | 1.00 | 0.00 |
| ATOM | 563 | OE1  | GLN | 36 | 0.374  | -19.024 | 4.564 | 1.00 | 0.00 |
| ATOM | 564 | NE2  | GLN | 36 | 0.467  | -17.605 | 6.308 | 1.00 | 0.00 |
| ATOM | 565 | HE21 | GLN | 36 | 1.475  | -17.558 | 6.267 | 1.00 | 0.00 |
| ATOM | 566 | HE22 | GLN | 36 | -0.042 | -17.076 | 7.002 | 1.00 | 0.00 |
| ATOM | 567 | C    | GLN | 36 | -1.709 | -15.817 | 2.837 | 1.00 | 0.00 |
| ATOM | 568 | O    | GLN | 36 | -2.421 | -16.126 | 1.888 | 1.00 | 0.00 |
| ATOM | 569 | N    | VAL | 37 | -0.568 | -15.161 | 2.707 | 1.00 | 0.00 |

|      |     |      |     |    |        |         |        |      |      |
|------|-----|------|-----|----|--------|---------|--------|------|------|
| ATOM | 570 | H    | VAL | 37 | -0.100 | -14.834 | 3.539  | 1.00 | 0.00 |
| ATOM | 571 | CA   | VAL | 37 | -0.012 | -14.805 | 1.425  | 1.00 | 0.00 |
| ATOM | 572 | HA   | VAL | 37 | -0.523 | -15.282 | 0.588  | 1.00 | 0.00 |
| ATOM | 573 | CB   | VAL | 37 | -0.022 | -13.246 | 1.198  | 1.00 | 0.00 |
| ATOM | 574 | HB   | VAL | 37 | -1.051 | -12.946 | 0.999  | 1.00 | 0.00 |
| ATOM | 575 | CG1  | VAL | 37 | 0.512  | -12.466 | 2.394  | 1.00 | 0.00 |
| ATOM | 576 | HG11 | VAL | 37 | 1.541  | -12.764 | 2.593  | 1.00 | 0.00 |
| ATOM | 577 | HG12 | VAL | 37 | 0.479  | -11.398 | 2.176  | 1.00 | 0.00 |
| ATOM | 578 | HG13 | VAL | 37 | -0.103 | -12.676 | 3.269  | 1.00 | 0.00 |
| ATOM | 579 | CG2  | VAL | 37 | 0.723  | -12.857 | -0.049 | 1.00 | 0.00 |
| ATOM | 580 | HG21 | VAL | 37 | 0.258  | -13.330 | -0.914 | 1.00 | 0.00 |
| ATOM | 581 | HG22 | VAL | 37 | 0.692  | -11.774 | -0.169 | 1.00 | 0.00 |
| ATOM | 582 | HG23 | VAL | 37 | 1.760  | -13.184 | 0.029  | 1.00 | 0.00 |
| ATOM | 583 | C    | VAL | 37 | 1.387  | -15.452 | 1.423  | 1.00 | 0.00 |
| ATOM | 584 | O    | VAL | 37 | 2.226  | -15.221 | 2.313  | 1.00 | 0.00 |
| ATOM | 585 | N    | GLY | 38 | 1.606  | -16.273 | 0.427  | 1.00 | 0.00 |
| ATOM | 586 | H    | GLY | 38 | 0.869  | -16.547 | -0.208 | 1.00 | 0.00 |
| ATOM | 587 | CA   | GLY | 38 | 2.946  | -16.818 | 0.211  | 1.00 | 0.00 |
| ATOM | 588 | HA2  | GLY | 38 | 3.185  | -17.380 | 1.114  | 1.00 | 0.00 |
| ATOM | 589 | HA3  | GLY | 38 | 2.853  | -17.505 | -0.630 | 1.00 | 0.00 |
| ATOM | 590 | C    | GLY | 38 | 4.068  | -15.838 | -0.073 | 1.00 | 0.00 |
| ATOM | 591 | O    | GLY | 38 | 3.826  | -14.694 | -0.453 | 1.00 | 0.00 |

|      |     |     |     |    |       |         |        |      |      |
|------|-----|-----|-----|----|-------|---------|--------|------|------|
| ATOM | 592 | N   | PRO | 39 | 5.311 | -16.272 | 0.090  | 1.00 | 0.00 |
| ATOM | 593 | CD  | PRO | 39 | 5.727 | -17.622 | 0.570  | 1.00 | 0.00 |
| ATOM | 594 | HD2 | PRO | 39 | 5.205 | -18.390 | -0.001 | 1.00 | 0.00 |
| ATOM | 595 | HD3 | PRO | 39 | 5.482 | -17.726 | 1.627  | 1.00 | 0.00 |
| ATOM | 596 | CG  | PRO | 39 | 7.179 | -17.626 | 0.327  | 1.00 | 0.00 |
| ATOM | 597 | HG2 | PRO | 39 | 7.371 | -18.096 | -0.638 | 1.00 | 0.00 |
| ATOM | 598 | HG3 | PRO | 39 | 7.664 | -18.202 | 1.114  | 1.00 | 0.00 |
| ATOM | 599 | CB  | PRO | 39 | 7.639 | -16.216 | 0.343  | 1.00 | 0.00 |
| ATOM | 600 | HB2 | PRO | 39 | 8.508 | -16.031 | -0.289 | 1.00 | 0.00 |
| ATOM | 601 | HB3 | PRO | 39 | 7.864 | -15.915 | 1.366  | 1.00 | 0.00 |
| ATOM | 602 | CA  | PRO | 39 | 6.457 | -15.438 | -0.173 | 1.00 | 0.00 |
| ATOM | 603 | HA  | PRO | 39 | 6.367 | -14.556 | 0.461  | 1.00 | 0.00 |
| ATOM | 604 | C   | PRO | 39 | 6.583 | -15.011 | -1.606 | 1.00 | 0.00 |
| ATOM | 605 | O   | PRO | 39 | 7.121 | -13.861 | -1.851 | 1.00 | 0.00 |
| ATOM | 606 | N   | GLN | 40 | 6.076 | -15.766 | -2.593 | 1.00 | 0.00 |
| ATOM | 607 | H   | GLN | 40 | 5.653 | -16.666 | -2.417 | 1.00 | 0.00 |
| ATOM | 608 | CA  | GLN | 40 | 6.205 | -15.339 | -3.928 | 1.00 | 0.00 |
| ATOM | 609 | HA  | GLN | 40 | 7.210 | -14.952 | -4.098 | 1.00 | 0.00 |
| ATOM | 610 | CB  | GLN | 40 | 5.965 | -16.489 | -4.873 | 1.00 | 0.00 |
| ATOM | 611 | HB2 | GLN | 40 | 4.990 | -16.927 | -4.660 | 1.00 | 0.00 |
| ATOM | 612 | HB3 | GLN | 40 | 5.978 | -16.116 | -5.897 | 1.00 | 0.00 |
| ATOM | 613 | CG  | GLN | 40 | 7.043 | -17.547 | -4.705 | 1.00 | 0.00 |

|      |     |      |     |    |        |         |        |      |      |
|------|-----|------|-----|----|--------|---------|--------|------|------|
| ATOM | 614 | HG2  | GLN | 40 | 8.024  | -17.189 | -5.017 | 1.00 | 0.00 |
| ATOM | 615 | HG3  | GLN | 40 | 7.052  | -17.741 | -3.633 | 1.00 | 0.00 |
| ATOM | 616 | CD   | GLN | 40 | 6.743  | -18.866 | -5.442 | 1.00 | 0.00 |
| ATOM | 617 | OE1  | GLN | 40 | 6.208  | -19.833 | -4.880 | 1.00 | 0.00 |
| ATOM | 618 | NE2  | GLN | 40 | 6.982  | -18.854 | -6.672 | 1.00 | 0.00 |
| ATOM | 619 | HE21 | GLN | 40 | 6.811  | -19.682 | -7.225 | 1.00 | 0.00 |
| ATOM | 620 | HE22 | GLN | 40 | 7.344  | -18.016 | -7.105 | 1.00 | 0.00 |
| ATOM | 621 | C    | GLN | 40 | 5.227  | -14.164 | -4.149 | 1.00 | 0.00 |
| ATOM | 622 | O    | GLN | 40 | 5.549  | -13.161 | -4.804 | 1.00 | 0.00 |
| ATOM | 623 | N    | GLN | 41 | 4.000  | -14.330 | -3.661 | 1.00 | 0.00 |
| ATOM | 624 | H    | GLN | 41 | 3.709  | -15.217 | -3.275 | 1.00 | 0.00 |
| ATOM | 625 | CA   | GLN | 41 | 3.011  | -13.243 | -3.734 | 1.00 | 0.00 |
| ATOM | 626 | HA   | GLN | 41 | 2.911  | -12.920 | -4.771 | 1.00 | 0.00 |
| ATOM | 627 | CB   | GLN | 41 | 1.653  | -13.681 | -3.232 | 1.00 | 0.00 |
| ATOM | 628 | HB2  | GLN | 41 | 1.390  | -14.643 | -3.671 | 1.00 | 0.00 |
| ATOM | 629 | HB3  | GLN | 41 | 1.672  | -13.770 | -2.146 | 1.00 | 0.00 |
| ATOM | 630 | CG   | GLN | 41 | 0.617  | -12.638 | -3.638 | 1.00 | 0.00 |
| ATOM | 631 | HG2  | GLN | 41 | 0.824  | -11.745 | -3.048 | 1.00 | 0.00 |
| ATOM | 632 | HG3  | GLN | 41 | 0.763  | -12.416 | -4.695 | 1.00 | 0.00 |
| ATOM | 633 | CD   | GLN | 41 | -0.817 | -13.032 | -3.424 | 1.00 | 0.00 |
| ATOM | 634 | OE1  | GLN | 41 | -1.167 | -14.217 | -3.315 | 1.00 | 0.00 |
| ATOM | 635 | NE2  | GLN | 41 | -1.669 | -12.032 | -3.377 | 1.00 | 0.00 |

|      |     |      |     |    |        |         |        |      |      |
|------|-----|------|-----|----|--------|---------|--------|------|------|
| ATOM | 636 | HE21 | GLN | 41 | -2.652 | -12.216 | -3.236 | 1.00 | 0.00 |
| ATOM | 637 | HE22 | GLN | 41 | -1.337 | -11.084 | -3.482 | 1.00 | 0.00 |
| ATOM | 638 | C    | GLN | 41 | 3.437  | -12.001 | -2.967 | 1.00 | 0.00 |
| ATOM | 639 | O    | GLN | 41 | 3.282  | -10.874 | -3.469 | 1.00 | 0.00 |
| ATOM | 640 | N    | VAL | 42 | 4.044  | -12.203 | -1.830 | 1.00 | 0.00 |
| ATOM | 641 | H    | VAL | 42 | 4.166  | -13.116 | -1.416 | 1.00 | 0.00 |
| ATOM | 642 | CA   | VAL | 42 | 4.585  | -11.011 | -1.096 | 1.00 | 0.00 |
| ATOM | 643 | HA   | VAL | 42 | 3.825  | -10.257 | -0.887 | 1.00 | 0.00 |
| ATOM | 644 | CB   | VAL | 42 | 5.249  | -11.417 | 0.224  | 1.00 | 0.00 |
| ATOM | 645 | HB   | VAL | 42 | 5.911  | -12.259 | 0.023  | 1.00 | 0.00 |
| ATOM | 646 | CG1  | VAL | 42 | 6.056  | -10.270 | 0.849  | 1.00 | 0.00 |
| ATOM | 647 | HG11 | VAL | 42 | 5.394  | -9.427  | 1.050  | 1.00 | 0.00 |
| ATOM | 648 | HG12 | VAL | 42 | 6.506  | -10.608 | 1.782  | 1.00 | 0.00 |
| ATOM | 649 | HG13 | VAL | 42 | 6.840  | -9.959  | 0.159  | 1.00 | 0.00 |
| ATOM | 650 | CG2  | VAL | 42 | 4.170  | -11.935 | 1.136  | 1.00 | 0.00 |
| ATOM | 651 | HG21 | VAL | 42 | 3.685  | -12.795 | 0.674  | 1.00 | 0.00 |
| ATOM | 652 | HG22 | VAL | 42 | 4.610  | -12.233 | 2.087  | 1.00 | 0.00 |
| ATOM | 653 | HG23 | VAL | 42 | 3.431  | -11.151 | 1.307  | 1.00 | 0.00 |
| ATOM | 654 | C    | VAL | 42 | 5.620  | -10.307 | -1.967 | 1.00 | 0.00 |
| ATOM | 655 | O    | VAL | 42 | 5.636  | -9.050  | -2.063 | 1.00 | 0.00 |
| ATOM | 656 | N    | GLY | 43 | 6.575  | -11.019 | -2.556 | 1.00 | 0.00 |
| ATOM | 657 | H    | GLY | 43 | 6.647  | -12.015 | -2.409 | 1.00 | 0.00 |

|      |     |     |     |    |       |         |         |      |      |
|------|-----|-----|-----|----|-------|---------|---------|------|------|
| ATOM | 658 | CA  | GLY | 43 | 7.511 | -10.401 | -3.402  | 1.00 | 0.00 |
| ATOM | 659 | HA2 | GLY | 43 | 8.072 | -9.677  | -2.812  | 1.00 | 0.00 |
| ATOM | 660 | HA3 | GLY | 43 | 8.188 | -11.169 | -3.774  | 1.00 | 0.00 |
| ATOM | 661 | C   | GLY | 43 | 6.888 | -9.702  | -4.562  | 1.00 | 0.00 |
| ATOM | 662 | O   | GLY | 43 | 7.279 | -8.573  | -4.837  | 1.00 | 0.00 |
| ATOM | 663 | N   | HIE | 44 | 5.905 | -10.250 | -5.197  | 1.00 | 0.00 |
| ATOM | 664 | H   | HIE | 44 | 5.729 | -11.235 | -5.061  | 1.00 | 0.00 |
| ATOM | 665 | CA  | HIE | 44 | 5.140 | -9.547  | -6.215  | 1.00 | 0.00 |
| ATOM | 666 | HA  | HIE | 44 | 5.803 | -9.165  | -6.991  | 1.00 | 0.00 |
| ATOM | 667 | CB  | HIE | 44 | 4.135 | -10.516 | -6.861  | 1.00 | 0.00 |
| ATOM | 668 | HB2 | HIE | 44 | 4.545 | -11.414 | -7.324  | 1.00 | 0.00 |
| ATOM | 669 | HB3 | HIE | 44 | 3.489 | -10.798 | -6.029  | 1.00 | 0.00 |
| ATOM | 670 | CG  | HIE | 44 | 3.257 | -9.872  | -7.883  | 1.00 | 0.00 |
| ATOM | 671 | ND1 | HIE | 44 | 3.744 | -9.475  | -9.108  | 1.00 | 0.00 |
| ATOM | 672 | CE1 | HIE | 44 | 2.770 | -8.928  | -9.813  | 1.00 | 0.00 |
| ATOM | 673 | HE1 | HIE | 44 | 2.933 | -8.600  | -10.840 | 1.00 | 0.00 |
| ATOM | 674 | NE2 | HIE | 44 | 1.690 | -8.887  | -9.051  | 1.00 | 0.00 |
| ATOM | 675 | HE2 | HIE | 44 | 0.788 | -8.522  | -9.323  | 1.00 | 0.00 |
| ATOM | 676 | CD2 | HIE | 44 | 1.985 | -9.422  | -7.822  | 1.00 | 0.00 |
| ATOM | 677 | HD2 | HIE | 44 | 1.234 | -9.418  | -7.032  | 1.00 | 0.00 |
| ATOM | 678 | C   | HIE | 44 | 4.485 | -8.255  | -5.711  | 1.00 | 0.00 |
| ATOM | 679 | O   | HIE | 44 | 4.475 | -7.274  | -6.433  | 1.00 | 0.00 |



|      |     |     |     |    |        |        |        |      |      |
|------|-----|-----|-----|----|--------|--------|--------|------|------|
| ATOM | 680 | N   | MET | 45 | 3.933  | -8.261 | -4.528 | 1.00 | 0.00 |
| ATOM | 681 | H   | MET | 45 | 3.825  | -9.107 | -3.988 | 1.00 | 0.00 |
| ATOM | 682 | CA  | MET | 45 | 3.327  | -7.020 | -4.011 | 1.00 | 0.00 |
| ATOM | 683 | HA  | MET | 45 | 2.622  | -6.619 | -4.740 | 1.00 | 0.00 |
| ATOM | 684 | CB  | MET | 45 | 2.583  | -7.297 | -2.718 | 1.00 | 0.00 |
| ATOM | 685 | HB2 | MET | 45 | 3.284  | -7.759 | -2.024 | 1.00 | 0.00 |
| ATOM | 686 | HB3 | MET | 45 | 2.250  | -6.340 | -2.315 | 1.00 | 0.00 |
| ATOM | 687 | CG  | MET | 45 | 1.379  | -8.214 | -2.911 | 1.00 | 0.00 |
| ATOM | 688 | HG2 | MET | 45 | 0.610  | -7.620 | -3.407 | 1.00 | 0.00 |
| ATOM | 689 | HG3 | MET | 45 | 1.700  | -9.017 | -3.574 | 1.00 | 0.00 |
| ATOM | 690 | SD  | MET | 45 | 0.702  | -8.922 | -1.415 | 1.00 | 0.00 |
| ATOM | 691 | CE  | MET | 45 | 0.500  | -7.342 | -0.540 | 1.00 | 0.00 |
| ATOM | 692 | HE1 | MET | 45 | -0.172 | -6.696 | -1.106 | 1.00 | 0.00 |
| ATOM | 693 | HE2 | MET | 45 | 0.080  | -7.525 | 0.449  | 1.00 | 0.00 |
| ATOM | 694 | HE3 | MET | 45 | 1.470  | -6.856 | -0.438 | 1.00 | 0.00 |
| ATOM | 695 | C   | MET | 45 | 4.367  | -5.928 | -3.869 | 1.00 | 0.00 |
| ATOM | 696 | O   | MET | 45 | 4.102  | -4.760 | -4.129 | 1.00 | 0.00 |
| ATOM | 697 | N   | TYR | 46 | 5.560  | -6.253 | -3.415 | 1.00 | 0.00 |
| ATOM | 698 | H   | TYR | 46 | 5.740  | -7.159 | -3.008 | 1.00 | 0.00 |
| ATOM | 699 | CA  | TYR | 46 | 6.616  | -5.274 | -3.396 | 1.00 | 0.00 |
| ATOM | 700 | HA  | TYR | 46 | 6.256  | -4.366 | -2.911 | 1.00 | 0.00 |
| ATOM | 701 | CB  | TYR | 46 | 7.843  | -5.784 | -2.634 | 1.00 | 0.00 |

|      |     |     |     |    |       |        |        |      |      |
|------|-----|-----|-----|----|-------|--------|--------|------|------|
| ATOM | 702 | HB2 | TYR | 46 | 8.022 | -6.811 | -2.950 | 1.00 | 0.00 |
| ATOM | 703 | HB3 | TYR | 46 | 8.683 | -5.159 | -2.937 | 1.00 | 0.00 |
| ATOM | 704 | CG  | TYR | 46 | 7.699 | -5.738 | -1.151 | 1.00 | 0.00 |
| ATOM | 705 | CD1 | TYR | 46 | 7.910 | -4.575 | -0.429 | 1.00 | 0.00 |
| ATOM | 706 | HD1 | TYR | 46 | 8.303 | -3.689 | -0.928 | 1.00 | 0.00 |
| ATOM | 707 | CE1 | TYR | 46 | 7.619 | -4.536 | 0.940  | 1.00 | 0.00 |
| ATOM | 708 | HE1 | TYR | 46 | 7.761 | -3.592 | 1.467  | 1.00 | 0.00 |
| ATOM | 709 | CZ  | TYR | 46 | 7.407 | -5.646 | 1.620  | 1.00 | 0.00 |
| ATOM | 710 | OH  | TYR | 46 | 7.145 | -5.647 | 3.020  | 1.00 | 0.00 |
| ATOM | 711 | HH  | TYR | 46 | 7.141 | -4.766 | 3.401  | 1.00 | 0.00 |
| ATOM | 712 | CE2 | TYR | 46 | 7.193 | -6.823 | 0.932  | 1.00 | 0.00 |
| ATOM | 713 | HE2 | TYR | 46 | 6.909 | -7.728 | 1.468  | 1.00 | 0.00 |
| ATOM | 714 | CD2 | TYR | 46 | 7.337 | -6.850 | -0.415 | 1.00 | 0.00 |
| ATOM | 715 | HD2 | TYR | 46 | 7.165 | -7.776 | -0.963 | 1.00 | 0.00 |
| ATOM | 716 | C   | TYR | 46 | 7.034 | -4.796 | -4.770 | 1.00 | 0.00 |
| ATOM | 717 | O   | TYR | 46 | 7.374 | -3.603 | -5.003 | 1.00 | 0.00 |
| ATOM | 718 | N   | ARG | 47 | 7.055 | -5.692 | -5.747 | 1.00 | 0.00 |
| ATOM | 719 | H   | ARG | 47 | 7.024 | -6.675 | -5.519 | 1.00 | 0.00 |
| ATOM | 720 | CA  | ARG | 47 | 7.284 | -5.315 | -7.125 | 1.00 | 0.00 |
| ATOM | 721 | HA  | ARG | 47 | 8.207 | -4.741 | -7.203 | 1.00 | 0.00 |
| ATOM | 722 | CB  | ARG | 47 | 7.406 | -6.561 | -8.009 | 1.00 | 0.00 |
| ATOM | 723 | HB2 | ARG | 47 | 8.139 | -7.229 | -7.557 | 1.00 | 0.00 |

|      |     |      |     |    |        |        |         |      |      |
|------|-----|------|-----|----|--------|--------|---------|------|------|
| ATOM | 724 | HB3  | ARG | 47 | 6.434  | -7.054 | -8.038  | 1.00 | 0.00 |
| ATOM | 725 | CG   | ARG | 47 | 7.844  | -6.214 | -9.435  | 1.00 | 0.00 |
| ATOM | 726 | HG2  | ARG | 47 | 7.243  | -5.385 | -9.810  | 1.00 | 0.00 |
| ATOM | 727 | HG3  | ARG | 47 | 8.895  | -5.928 | -9.434  | 1.00 | 0.00 |
| ATOM | 728 | CD   | ARG | 47 | 7.648  | -7.437 | -10.339 | 1.00 | 0.00 |
| ATOM | 729 | HD2  | ARG | 47 | 8.428  | -8.139 | -10.045 | 1.00 | 0.00 |
| ATOM | 730 | HD3  | ARG | 47 | 6.673  | -7.842 | -10.067 | 1.00 | 0.00 |
| ATOM | 731 | NE   | ARG | 47 | 7.696  | -7.262 | -11.819 | 1.00 | 0.00 |
| ATOM | 732 | HE   | ARG | 47 | 6.807  | -7.104 | -12.273 | 1.00 | 0.00 |
| ATOM | 733 | CZ   | ARG | 47 | 8.803  | -7.307 | -12.576 | 1.00 | 0.00 |
| ATOM | 734 | NH1  | ARG | 47 | 10.022 | -7.466 | -12.045 | 1.00 | 0.00 |
| ATOM | 735 | HH11 | ARG | 47 | 10.125 | -7.556 | -11.045 | 1.00 | 0.00 |
| ATOM | 736 | HH12 | ARG | 47 | 10.832 | -7.495 | -12.648 | 1.00 | 0.00 |
| ATOM | 737 | NH2  | ARG | 47 | 8.696  | -7.181 | -13.895 | 1.00 | 0.00 |
| ATOM | 738 | HH21 | ARG | 47 | 7.786  | -7.053 | -14.315 | 1.00 | 0.00 |
| ATOM | 739 | HH22 | ARG | 47 | 9.525  | -7.214 | -14.471 | 1.00 | 0.00 |
| ATOM | 740 | C    | ARG | 47 | 6.279  | -4.331 | -7.650  | 1.00 | 0.00 |
| ATOM | 741 | O    | ARG | 47 | 6.646  | -3.333 | -8.293  | 1.00 | 0.00 |
| ATOM | 742 | N    | VAL | 48 | 5.019  | -4.576 | -7.402  | 1.00 | 0.00 |
| ATOM | 743 | H    | VAL | 48 | 4.774  | -5.398 | -6.870  | 1.00 | 0.00 |
| ATOM | 744 | CA   | VAL | 48 | 3.938  | -3.677 | -7.833  | 1.00 | 0.00 |
| ATOM | 745 | HA   | VAL | 48 | 3.962  | -3.592 | -8.920  | 1.00 | 0.00 |

|      |     |      |     |    |       |        |        |      |      |
|------|-----|------|-----|----|-------|--------|--------|------|------|
| ATOM | 746 | CB   | VAL | 48 | 2.562 | -4.209 | -7.413 | 1.00 | 0.00 |
| ATOM | 747 | HB   | VAL | 48 | 2.608 | -4.470 | -6.356 | 1.00 | 0.00 |
| ATOM | 748 | CG1  | VAL | 48 | 1.473 | -3.201 | -7.632 | 1.00 | 0.00 |
| ATOM | 749 | HG11 | VAL | 48 | 1.426 | -2.940 | -8.689 | 1.00 | 0.00 |
| ATOM | 750 | HG12 | VAL | 48 | 0.518 | -3.623 | -7.320 | 1.00 | 0.00 |
| ATOM | 751 | HG13 | VAL | 48 | 1.682 | -2.306 | -7.046 | 1.00 | 0.00 |
| ATOM | 752 | CG2  | VAL | 48 | 2.304 | -5.429 | -8.277 | 1.00 | 0.00 |
| ATOM | 753 | HG21 | VAL | 48 | 3.083 | -6.170 | -8.101 | 1.00 | 0.00 |
| ATOM | 754 | HG22 | VAL | 48 | 1.333 | -5.855 | -8.024 | 1.00 | 0.00 |
| ATOM | 755 | HG23 | VAL | 48 | 2.310 | -5.138 | -9.328 | 1.00 | 0.00 |
| ATOM | 756 | C    | VAL | 48 | 4.190 | -2.353 | -7.120 | 1.00 | 0.00 |
| ATOM | 757 | O    | VAL | 48 | 4.137 | -1.244 | -7.755 | 1.00 | 0.00 |
| ATOM | 758 | N    | ALA | 49 | 4.357 | -2.397 | -5.791 | 1.00 | 0.00 |
| ATOM | 759 | H    | ALA | 49 | 4.330 | -3.266 | -5.277 | 1.00 | 0.00 |
| ATOM | 760 | CA   | ALA | 49 | 4.531 | -1.157 | -5.044 | 1.00 | 0.00 |
| ATOM | 761 | HA   | ALA | 49 | 3.632 | -0.555 | -5.184 | 1.00 | 0.00 |
| ATOM | 762 | CB   | ALA | 49 | 4.725 | -1.411 | -3.533 | 1.00 | 0.00 |
| ATOM | 763 | HB1  | ALA | 49 | 5.626 | -2.004 | -3.377 | 1.00 | 0.00 |
| ATOM | 764 | HB2  | ALA | 49 | 4.823 | -0.458 | -3.014 | 1.00 | 0.00 |
| ATOM | 765 | HB3  | ALA | 49 | 3.862 | -1.950 | -3.141 | 1.00 | 0.00 |
| ATOM | 766 | C    | ALA | 49 | 5.695 | -0.376 | -5.563 | 1.00 | 0.00 |
| ATOM | 767 | O    | ALA | 49 | 5.640 | 0.911  | -5.593 | 1.00 | 0.00 |

|      |     |     |     |    |        |        |         |      |      |
|------|-----|-----|-----|----|--------|--------|---------|------|------|
| ATOM | 768 | N   | SER | 50 | 6.794  | -1.014 | -5.952  | 1.00 | 0.00 |
| ATOM | 769 | H   | SER | 50 | 6.849  | -1.984 | -5.676  | 1.00 | 0.00 |
| ATOM | 770 | CA  | SER | 50 | 7.965  | -0.398 | -6.525  | 1.00 | 0.00 |
| ATOM | 771 | HA  | SER | 50 | 8.314  | 0.399  | -5.869  | 1.00 | 0.00 |
| ATOM | 772 | CB  | SER | 50 | 9.115  | -1.433 | -6.706  | 1.00 | 0.00 |
| ATOM | 773 | HB2 | SER | 50 | 10.077 | -0.925 | -6.765  | 1.00 | 0.00 |
| ATOM | 774 | HB3 | SER | 50 | 9.126  | -2.137 | -5.875  | 1.00 | 0.00 |
| ATOM | 775 | OG  | SER | 50 | 8.878  | -2.127 | -7.904  | 1.00 | 0.00 |
| ATOM | 776 | HG  | SER | 50 | 9.573  | -2.774 | -8.042  | 1.00 | 0.00 |
| ATOM | 777 | C   | SER | 50 | 7.727  | 0.457  | -7.778  | 1.00 | 0.00 |
| ATOM | 778 | O   | SER | 50 | 8.479  | 1.387  | -8.019  | 1.00 | 0.00 |
| ATOM | 779 | N   | ARG | 51 | 6.655  | 0.176  | -8.496  | 1.00 | 0.00 |
| ATOM | 780 | H   | ARG | 51 | 6.015  | -0.535 | -8.172  | 1.00 | 0.00 |
| ATOM | 781 | CA  | ARG | 51 | 6.369  | 0.828  | -9.720  | 1.00 | 0.00 |
| ATOM | 782 | HA  | ARG | 51 | 7.309  | 1.128  | -10.183 | 1.00 | 0.00 |
| ATOM | 783 | CB  | ARG | 51 | 5.617  | -0.043 | -10.683 | 1.00 | 0.00 |
| ATOM | 784 | HB2 | ARG | 51 | 4.748  | -0.440 | -10.158 | 1.00 | 0.00 |
| ATOM | 785 | HB3 | ARG | 51 | 5.285  | 0.588  | -11.508 | 1.00 | 0.00 |
| ATOM | 786 | CG  | ARG | 51 | 6.459  | -1.206 | -11.235 | 1.00 | 0.00 |
| ATOM | 787 | HG2 | ARG | 51 | 7.385  | -0.801 | -11.641 | 1.00 | 0.00 |
| ATOM | 788 | HG3 | ARG | 51 | 6.689  | -1.887 | -10.416 | 1.00 | 0.00 |
| ATOM | 789 | CD  | ARG | 51 | 5.722  | -1.952 | -12.315 | 1.00 | 0.00 |

|      |     |      |     |    |       |        |         |      |      |
|------|-----|------|-----|----|-------|--------|---------|------|------|
| ATOM | 790 | HD2  | ARG | 51 | 4.750 | -2.261 | -11.930 | 1.00 | 0.00 |
| ATOM | 791 | HD3  | ARG | 51 | 5.579 | -1.288 | -13.168 | 1.00 | 0.00 |
| ATOM | 792 | NE   | ARG | 51 | 6.461 | -3.160 | -12.770 | 1.00 | 0.00 |
| ATOM | 793 | HE   | ARG | 51 | 6.369 | -4.031 | -12.267 | 1.00 | 0.00 |
| ATOM | 794 | CZ   | ARG | 51 | 7.284 | -3.113 | -13.810 | 1.00 | 0.00 |
| ATOM | 795 | NH1  | ARG | 51 | 7.436 | -2.036 | -14.485 | 1.00 | 0.00 |
| ATOM | 796 | HH11 | ARG | 51 | 6.923 | -1.205 | -14.227 | 1.00 | 0.00 |
| ATOM | 797 | HH12 | ARG | 51 | 8.067 | -2.022 | -15.273 | 1.00 | 0.00 |
| ATOM | 798 | NH2  | ARG | 51 | 7.917 | -4.202 | -14.175 | 1.00 | 0.00 |
| ATOM | 799 | HH21 | ARG | 51 | 7.773 | -5.061 | -13.664 | 1.00 | 0.00 |
| ATOM | 800 | HH22 | ARG | 51 | 8.545 | -4.176 | -14.965 | 1.00 | 0.00 |
| ATOM | 801 | C    | ARG | 51 | 5.536 | 2.071  | -9.475  | 1.00 | 0.00 |
| ATOM | 802 | O    | ARG | 51 | 5.389 | 2.887  | -10.367 | 1.00 | 0.00 |
| ATOM | 803 | N    | ILE | 52 | 4.944 | 2.208  | -8.268  | 1.00 | 0.00 |
| ATOM | 804 | H    | ILE | 52 | 5.072 | 1.523  | -7.538  | 1.00 | 0.00 |
| ATOM | 805 | CA   | ILE | 52 | 3.958 | 3.230  | -8.075  | 1.00 | 0.00 |
| ATOM | 806 | HA   | ILE | 52 | 3.280 | 3.323  | -8.924  | 1.00 | 0.00 |
| ATOM | 807 | CB   | ILE | 52 | 3.142 | 2.957  | -6.792  | 1.00 | 0.00 |
| ATOM | 808 | HB   | ILE | 52 | 3.829 | 2.733  | -5.976  | 1.00 | 0.00 |
| ATOM | 809 | CG2  | ILE | 52 | 2.276 | 4.207  | -6.416  | 1.00 | 0.00 |
| ATOM | 810 | HG21 | ILE | 52 | 1.588 | 4.432  | -7.232  | 1.00 | 0.00 |
| ATOM | 811 | HG22 | ILE | 52 | 1.708 | 3.997  | -5.510  | 1.00 | 0.00 |

|      |     |      |     |    |       |       |        |      |      |
|------|-----|------|-----|----|-------|-------|--------|------|------|
| ATOM | 812 | HG23 | ILE | 52 | 2.928 | 5.064 | -6.245 | 1.00 | 0.00 |
| ATOM | 813 | CG1  | ILE | 52 | 2.304 | 1.699 | -6.994 | 1.00 | 0.00 |
| ATOM | 814 | HG12 | ILE | 52 | 1.626 | 1.870 | -7.831 | 1.00 | 0.00 |
| ATOM | 815 | HG13 | ILE | 52 | 2.975 | 0.875 | -7.234 | 1.00 | 0.00 |
| ATOM | 816 | CD1  | ILE | 52 | 1.495 | 1.350 | -5.746 | 1.00 | 0.00 |
| ATOM | 817 | HD11 | ILE | 52 | 0.822 | 2.174 | -5.506 | 1.00 | 0.00 |
| ATOM | 818 | HD12 | ILE | 52 | 0.911 | 0.448 | -5.931 | 1.00 | 0.00 |
| ATOM | 819 | HD13 | ILE | 52 | 2.172 | 1.179 | -4.910 | 1.00 | 0.00 |
| ATOM | 820 | C    | ILE | 52 | 4.507 | 4.656 | -8.153 | 1.00 | 0.00 |
| ATOM | 821 | O    | ILE | 52 | 3.854 | 5.499 | -8.769 | 1.00 | 0.00 |
| ATOM | 822 | N    | PRO | 53 | 5.658 | 4.885 | -7.614 | 1.00 | 0.00 |
| ATOM | 823 | CD   | PRO | 53 | 6.542 | 4.113 | -6.696 | 1.00 | 0.00 |
| ATOM | 824 | HD2  | PRO | 53 | 7.172 | 3.454 | -7.293 | 1.00 | 0.00 |
| ATOM | 825 | HD3  | PRO | 53 | 5.917 | 3.515 | -6.033 | 1.00 | 0.00 |
| ATOM | 826 | CG   | PRO | 53 | 7.342 | 5.164 | -5.946 | 1.00 | 0.00 |
| ATOM | 827 | HG2  | PRO | 53 | 8.319 | 4.790 | -5.641 | 1.00 | 0.00 |
| ATOM | 828 | HG3  | PRO | 53 | 6.806 | 5.534 | -5.072 | 1.00 | 0.00 |
| ATOM | 829 | CB   | PRO | 53 | 7.466 | 6.224 | -6.980 | 1.00 | 0.00 |
| ATOM | 830 | HB2  | PRO | 53 | 8.266 | 5.919 | -7.654 | 1.00 | 0.00 |
| ATOM | 831 | HB3  | PRO | 53 | 7.697 | 7.204 | -6.563 | 1.00 | 0.00 |
| ATOM | 832 | CA   | PRO | 53 | 6.175 | 6.278 | -7.719 | 1.00 | 0.00 |
| ATOM | 833 | HA   | PRO | 53 | 5.445 | 6.952 | -7.269 | 1.00 | 0.00 |

|      |     |      |     |    |       |       |         |      |      |
|------|-----|------|-----|----|-------|-------|---------|------|------|
| ATOM | 834 | C    | PRO | 53 | 6.411 | 6.683 | -9.175  | 1.00 | 0.00 |
| ATOM | 835 | O    | PRO | 53 | 5.948 | 7.762 | -9.553  | 1.00 | 0.00 |
| ATOM | 836 | N    | ALA | 54 | 6.961 | 5.838 | -10.063 | 1.00 | 0.00 |
| ATOM | 837 | H    | ALA | 54 | 7.503 | 5.024 | -9.813  | 1.00 | 0.00 |
| ATOM | 838 | CA   | ALA | 54 | 6.914 | 6.238 | -11.484 | 1.00 | 0.00 |
| ATOM | 839 | HA   | ALA | 54 | 7.401 | 7.212 | -11.429 | 1.00 | 0.00 |
| ATOM | 840 | CB   | ALA | 54 | 7.752 | 5.329 | -12.340 | 1.00 | 0.00 |
| ATOM | 841 | HB1  | ALA | 54 | 7.272 | 4.353 | -12.412 | 1.00 | 0.00 |
| ATOM | 842 | HB2  | ALA | 54 | 7.852 | 5.759 | -13.337 | 1.00 | 0.00 |
| ATOM | 843 | HB3  | ALA | 54 | 8.739 | 5.216 | -11.893 | 1.00 | 0.00 |
| ATOM | 844 | C    | ALA | 54 | 5.608 | 6.421 | -12.115 | 1.00 | 0.00 |
| ATOM | 845 | O    | ALA | 54 | 5.426 | 7.332 | -12.924 | 1.00 | 0.00 |
| ATOM | 846 | N    | ILE | 55 | 4.626 | 5.594 | -11.829 | 1.00 | 0.00 |
| ATOM | 847 | H    | ILE | 55 | 4.847 | 4.784 | -11.269 | 1.00 | 0.00 |
| ATOM | 848 | CA   | ILE | 55 | 3.293 | 5.702 | -12.383 | 1.00 | 0.00 |
| ATOM | 849 | HA   | ILE | 55 | 3.285 | 5.794 | -13.469 | 1.00 | 0.00 |
| ATOM | 850 | CB   | ILE | 55 | 2.433 | 4.537 | -11.973 | 1.00 | 0.00 |
| ATOM | 851 | HB   | ILE | 55 | 2.590 | 4.368 | -10.908 | 1.00 | 0.00 |
| ATOM | 852 | CG2  | ILE | 55 | 0.947 | 4.769 | -12.237 | 1.00 | 0.00 |
| ATOM | 853 | HG21 | ILE | 55 | 0.788 | 4.938 | -13.302 | 1.00 | 0.00 |
| ATOM | 854 | HG22 | ILE | 55 | 0.380 | 3.894 | -11.920 | 1.00 | 0.00 |
| ATOM | 855 | HG23 | ILE | 55 | 0.610 | 5.642 | -11.678 | 1.00 | 0.00 |



|      |     |      |     |    |       |        |         |      |      |
|------|-----|------|-----|----|-------|--------|---------|------|------|
| ATOM | 856 | CG1  | ILE | 55 | 2.982 | 3.325  | -12.657 | 1.00 | 0.00 |
| ATOM | 857 | HG12 | ILE | 55 | 2.780 | 3.415  | -13.725 | 1.00 | 0.00 |
| ATOM | 858 | HG13 | ILE | 55 | 4.059 | 3.298  | -12.492 | 1.00 | 0.00 |
| ATOM | 859 | CD1  | ILE | 55 | 2.378 | 2.088  | -12.147 | 1.00 | 0.00 |
| ATOM | 860 | HD11 | ILE | 55 | 1.301 | 2.114  | -12.312 | 1.00 | 0.00 |
| ATOM | 861 | HD12 | ILE | 55 | 2.804 | 1.233  | -12.671 | 1.00 | 0.00 |
| ATOM | 862 | HD13 | ILE | 55 | 2.579 | 1.998  | -11.080 | 1.00 | 0.00 |
| ATOM | 863 | C    | ILE | 55 | 2.714 | 7.083  | -12.010 | 1.00 | 0.00 |
| ATOM | 864 | O    | ILE | 55 | 2.103 | 7.742  | -12.851 | 1.00 | 0.00 |
| ATOM | 865 | N    | CYX | 56 | 2.928 | 7.420  | -10.769 | 1.00 | 0.00 |
| ATOM | 866 | H    | CYX | 56 | 3.272 | 6.704  | -10.146 | 1.00 | 0.00 |
| ATOM | 867 | CA   | CYX | 56 | 2.551 | 8.721  | -10.196 | 1.00 | 0.00 |
| ATOM | 868 | HA   | CYX | 56 | 1.570 | 9.024  | -10.563 | 1.00 | 0.00 |
| ATOM | 869 | CB   | CYX | 56 | 2.491 | 8.614  | -8.670  | 1.00 | 0.00 |
| ATOM | 870 | HB2  | CYX | 56 | 3.496 | 8.467  | -8.276  | 1.00 | 0.00 |
| ATOM | 871 | HB3  | CYX | 56 | 2.070 | 9.531  | -8.257  | 1.00 | 0.00 |
| ATOM | 872 | SG   | CYX | 56 | 1.242 | 7.391  | -8.073  | 1.00 | 0.00 |
| ATOM | 873 | C    | CYX | 56 | 3.337 | 9.900  | -10.605 | 1.00 | 0.00 |
| ATOM | 874 | O    | CYX | 56 | 3.022 | 11.004 | -10.181 | 1.00 | 0.00 |
| ATOM | 875 | N    | ASN | 57 | 4.474 | 9.673  | -11.249 | 1.00 | 0.00 |
| ATOM | 876 | H    | ASN | 57 | 4.753 | 8.715  | -11.406 | 1.00 | 0.00 |
| ATOM | 877 | CA   | ASN | 57 | 5.430 | 10.748 | -11.597 | 1.00 | 0.00 |

|      |     |      |     |    |       |        |         |      |      |
|------|-----|------|-----|----|-------|--------|---------|------|------|
| ATOM | 878 | HA   | ASN | 57 | 6.296 | 10.348 | -12.125 | 1.00 | 0.00 |
| ATOM | 879 | CB   | ASN | 57 | 4.716 | 11.726 | -12.510 | 1.00 | 0.00 |
| ATOM | 880 | HB2  | ASN | 57 | 3.707 | 11.389 | -12.750 | 1.00 | 0.00 |
| ATOM | 881 | HB3  | ASN | 57 | 4.663 | 12.666 | -11.961 | 1.00 | 0.00 |
| ATOM | 882 | CG   | ASN | 57 | 5.438 | 11.953 | -13.753 | 1.00 | 0.00 |
| ATOM | 883 | OD1  | ASN | 57 | 6.197 | 11.092 | -14.213 | 1.00 | 0.00 |
| ATOM | 884 | ND2  | ASN | 57 | 5.168 | 13.086 | -14.368 | 1.00 | 0.00 |
| ATOM | 885 | HD21 | ASN | 57 | 5.633 | 13.309 | -15.237 | 1.00 | 0.00 |
| ATOM | 886 | HD22 | ASN | 57 | 4.497 | 13.727 | -13.969 | 1.00 | 0.00 |
| ATOM | 887 | C    | ASN | 57 | 6.052 | 11.342 | -10.389 | 1.00 | 0.00 |
| ATOM | 888 | O    | ASN | 57 | 6.333 | 12.573 | -10.373 | 1.00 | 0.00 |
| ATOM | 889 | N    | LEU | 58 | 6.292 | 10.558 | -9.339  | 1.00 | 0.00 |
| ATOM | 890 | H    | LEU | 58 | 6.039 | 9.584  | -9.426  | 1.00 | 0.00 |
| ATOM | 891 | CA   | LEU | 58 | 6.777 | 11.013 | -8.100  | 1.00 | 0.00 |
| ATOM | 892 | HA   | LEU | 58 | 6.850 | 12.100 | -8.152  | 1.00 | 0.00 |
| ATOM | 893 | CB   | LEU | 58 | 5.911 | 10.640 | -6.904  | 1.00 | 0.00 |
| ATOM | 894 | HB2  | LEU | 58 | 5.853 | 9.552  | -6.927  | 1.00 | 0.00 |
| ATOM | 895 | HB3  | LEU | 58 | 6.447 | 10.957 | -6.010  | 1.00 | 0.00 |
| ATOM | 896 | CG   | LEU | 58 | 4.535 | 11.209 | -6.884  | 1.00 | 0.00 |
| ATOM | 897 | HG   | LEU | 58 | 4.054 | 11.034 | -7.847  | 1.00 | 0.00 |
| ATOM | 898 | CD1  | LEU | 58 | 3.719 | 10.533 | -5.774  | 1.00 | 0.00 |
| ATOM | 899 | HD11 | LEU | 58 | 4.199 | 10.709 | -4.811  | 1.00 | 0.00 |

|      |     |      |     |    |        |        |         |      |      |
|------|-----|------|-----|----|--------|--------|---------|------|------|
| ATOM | 900 | HD12 | LEU | 58 | 2.711  | 10.949 | -5.759  | 1.00 | 0.00 |
| ATOM | 901 | HD13 | LEU | 58 | 3.666  | 9.461  | -5.963  | 1.00 | 0.00 |
| ATOM | 902 | CD2  | LEU | 58 | 4.558  | 12.753 | -6.650  | 1.00 | 0.00 |
| ATOM | 903 | HD21 | LEU | 58 | 5.118  | 13.234 | -7.452  | 1.00 | 0.00 |
| ATOM | 904 | HD22 | LEU | 58 | 3.537  | 13.135 | -6.641  | 1.00 | 0.00 |
| ATOM | 905 | HD23 | LEU | 58 | 5.034  | 12.969 | -5.694  | 1.00 | 0.00 |
| ATOM | 906 | C    | LEU | 58 | 8.185  | 10.534 | -7.893  | 1.00 | 0.00 |
| ATOM | 907 | O    | LEU | 58 | 8.537  | 9.331  | -7.987  | 1.00 | 0.00 |
| ATOM | 908 | N    | GLN | 59 | 9.063  | 11.398 | -7.480  | 1.00 | 0.00 |
| ATOM | 909 | H    | GLN | 59 | 8.821  | 12.378 | -7.429  | 1.00 | 0.00 |
| ATOM | 910 | CA   | GLN | 59 | 10.399 | 10.992 | -7.056  | 1.00 | 0.00 |
| ATOM | 911 | HA   | GLN | 59 | 10.837 | 10.329 | -7.802  | 1.00 | 0.00 |
| ATOM | 912 | CB   | GLN | 59 | 11.316 | 12.229 | -6.894  | 1.00 | 0.00 |
| ATOM | 913 | HB2  | GLN | 59 | 10.866 | 12.888 | -6.151  | 1.00 | 0.00 |
| ATOM | 914 | HB3  | GLN | 59 | 12.286 | 11.886 | -6.535  | 1.00 | 0.00 |
| ATOM | 915 | CG   | GLN | 59 | 11.492 | 12.962 | -8.155  | 1.00 | 0.00 |
| ATOM | 916 | HG2  | GLN | 59 | 10.496 | 13.064 | -8.587  | 1.00 | 0.00 |
| ATOM | 917 | HG3  | GLN | 59 | 11.892 | 13.951 | -7.930  | 1.00 | 0.00 |
| ATOM | 918 | CD   | GLN | 59 | 12.399 | 12.291 | -9.176  | 1.00 | 0.00 |
| ATOM | 919 | OE1  | GLN | 59 | 12.608 | 11.079 | -9.179  | 1.00 | 0.00 |
| ATOM | 920 | NE2  | GLN | 59 | 12.973 | 13.105 | -10.039 | 1.00 | 0.00 |
| ATOM | 921 | HE21 | GLN | 59 | 13.589 | 12.733 | -10.747 | 1.00 | 0.00 |

|      |     |      |     |    |        |        |         |      |      |
|------|-----|------|-----|----|--------|--------|---------|------|------|
| ATOM | 922 | HE22 | GLN | 59 | 12.794 | 14.098 | -9.988  | 1.00 | 0.00 |
| ATOM | 923 | C    | GLN | 59 | 10.313 | 10.305 | -5.733  | 1.00 | 0.00 |
| ATOM | 924 | O    | GLN | 59 | 9.482  | 10.630 | -4.917  | 1.00 | 0.00 |
| ATOM | 925 | N    | PRO | 60 | 11.117 | 9.272  | -5.513  | 1.00 | 0.00 |
| ATOM | 926 | CD   | PRO | 60 | 11.131 | 8.551  | -4.223  | 1.00 | 0.00 |
| ATOM | 927 | HD2  | PRO | 60 | 10.149 | 8.117  | -4.036  | 1.00 | 0.00 |
| ATOM | 928 | HD3  | PRO | 60 | 11.381 | 9.244  | -3.419  | 1.00 | 0.00 |
| ATOM | 929 | CG   | PRO | 60 | 12.195 | 7.506  | -4.432  | 1.00 | 0.00 |
| ATOM | 930 | HG2  | PRO | 60 | 11.738 | 6.576  | -4.769  | 1.00 | 0.00 |
| ATOM | 931 | HG3  | PRO | 60 | 12.729 | 7.331  | -3.499  | 1.00 | 0.00 |
| ATOM | 932 | CB   | PRO | 60 | 13.100 | 8.069  | -5.462  | 1.00 | 0.00 |
| ATOM | 933 | HB2  | PRO | 60 | 13.409 | 7.123  | -5.906  | 1.00 | 0.00 |
| ATOM | 934 | HB3  | PRO | 60 | 13.979 | 8.683  | -5.268  | 1.00 | 0.00 |
| ATOM | 935 | CA   | PRO | 60 | 12.151 | 8.802  | -6.410  | 1.00 | 0.00 |
| ATOM | 936 | HA   | PRO | 60 | 12.556 | 9.580  | -7.058  | 1.00 | 0.00 |
| ATOM | 937 | C    | PRO | 60 | 11.377 | 7.818  | -7.236  | 1.00 | 0.00 |
| ATOM | 938 | O    | PRO | 60 | 10.361 | 7.289  | -6.782  | 1.00 | 0.00 |
| ATOM | 939 | N    | MET | 61 | 11.788 | 7.504  | -8.391  | 1.00 | 0.00 |
| ATOM | 940 | H    | MET | 61 | 12.695 | 7.674  | -8.800  | 1.00 | 0.00 |
| ATOM | 941 | CA   | MET | 61 | 10.726 | 6.934  | -9.251  | 1.00 | 0.00 |
| ATOM | 942 | HA   | MET | 61 | 9.737  | 7.301  | -8.976  | 1.00 | 0.00 |
| ATOM | 943 | CB   | MET | 61 | 11.033 | 7.387  | -10.635 | 1.00 | 0.00 |

|      |     |         |    |        |       |         |      |      |
|------|-----|---------|----|--------|-------|---------|------|------|
| ATOM | 944 | HB2 MET | 61 | 12.071 | 7.147 | -10.862 | 1.00 | 0.00 |
| ATOM | 945 | HB3 MET | 61 | 10.378 | 6.862 | -11.331 | 1.00 | 0.00 |
| ATOM | 946 | CG MET  | 61 | 10.819 | 8.886 | -10.772 | 1.00 | 0.00 |
| ATOM | 947 | HG2 MET | 61 | 10.780 | 9.315 | -9.771  | 1.00 | 0.00 |
| ATOM | 948 | HG3 MET | 61 | 11.670 | 9.301 | -11.312 | 1.00 | 0.00 |
| ATOM | 949 | SD MET  | 61 | 9.338  | 9.289 | -11.631 | 1.00 | 0.00 |
| ATOM | 950 | CE MET  | 61 | 9.489  | 8.638 | -13.204 | 1.00 | 0.00 |
| ATOM | 951 | HE1 MET | 61 | 9.617  | 7.558 | -13.140 | 1.00 | 0.00 |
| ATOM | 952 | HE2 MET | 61 | 8.590  | 8.863 | -13.779 | 1.00 | 0.00 |
| ATOM | 953 | HE3 MET | 61 | 10.355 | 9.078 | -13.698 | 1.00 | 0.00 |
| ATOM | 954 | C MET   | 61 | 10.590 | 5.386 | -9.103  | 1.00 | 0.00 |
| ATOM | 955 | O MET   | 61 | 9.649  | 4.754 | -9.591  | 1.00 | 0.00 |
| ATOM | 956 | N ARG   | 62 | 11.463 | 4.829 | -8.304  | 1.00 | 0.00 |
| ATOM | 957 | H ARG   | 62 | 12.179 | 5.390 | -7.865  | 1.00 | 0.00 |
| ATOM | 958 | CA ARG  | 62 | 11.449 | 3.402 | -8.043  | 1.00 | 0.00 |
| ATOM | 959 | HA ARG  | 62 | 10.430 | 3.024 | -8.127  | 1.00 | 0.00 |
| ATOM | 960 | CB ARG  | 62 | 12.335 | 2.655 | -9.054  | 1.00 | 0.00 |
| ATOM | 961 | HB2 ARG | 62 | 11.878 | 2.810 | -10.032 | 1.00 | 0.00 |
| ATOM | 962 | HB3 ARG | 62 | 13.308 | 3.145 | -9.027  | 1.00 | 0.00 |
| ATOM | 963 | CG ARG  | 62 | 12.513 | 1.142 | -8.803  | 1.00 | 0.00 |
| ATOM | 964 | HG2 ARG | 62 | 13.288 | 0.810 | -9.494  | 1.00 | 0.00 |
| ATOM | 965 | HG3 ARG | 62 | 12.874 | 1.046 | -7.779  | 1.00 | 0.00 |

|      |     |      |     |    |        |        |         |      |      |
|------|-----|------|-----|----|--------|--------|---------|------|------|
| ATOM | 966 | CD   | ARG | 62 | 11.260 | 0.276  | -8.986  | 1.00 | 0.00 |
| ATOM | 967 | HD2  | ARG | 62 | 11.496 | -0.745 | -8.686  | 1.00 | 0.00 |
| ATOM | 968 | HD3  | ARG | 62 | 10.469 | 0.669  | -8.347  | 1.00 | 0.00 |
| ATOM | 969 | NE   | ARG | 62 | 10.775 | 0.259  | -10.383 | 1.00 | 0.00 |
| ATOM | 970 | HE   | ARG | 62 | 10.865 | 1.143  | -10.864 | 1.00 | 0.00 |
| ATOM | 971 | CZ   | ARG | 62 | 10.235 | -0.779 | -11.045 | 1.00 | 0.00 |
| ATOM | 972 | NH1  | ARG | 62 | 10.049 | -1.989 | -10.485 | 1.00 | 0.00 |
| ATOM | 973 | HH11 | ARG | 62 | 10.320 | -2.145 | -9.525  | 1.00 | 0.00 |
| ATOM | 974 | HH12 | ARG | 62 | 9.638  | -2.735 | -11.028 | 1.00 | 0.00 |
| ATOM | 975 | NH2  | ARG | 62 | 9.880  | -0.595 | -12.325 | 1.00 | 0.00 |
| ATOM | 976 | HH21 | ARG | 62 | 10.022 | 0.305  | -12.761 | 1.00 | 0.00 |
| ATOM | 977 | HH22 | ARG | 62 | 9.472  | -1.357 | -12.847 | 1.00 | 0.00 |
| ATOM | 978 | C    | ARG | 62 | 11.955 | 3.209  | -6.629  | 1.00 | 0.00 |
| ATOM | 979 | O    | ARG | 62 | 12.736 | 4.022  | -6.081  | 1.00 | 0.00 |
| ATOM | 980 | N    | CYX | 63 | 11.430 | 2.186  | -5.990  | 1.00 | 0.00 |
| ATOM | 981 | H    | CYX | 63 | 10.737 | 1.621  | -6.460  | 1.00 | 0.00 |
| ATOM | 982 | CA   | CYX | 63 | 11.842 | 1.800  | -4.686  | 1.00 | 0.00 |
| ATOM | 983 | HA   | CYX | 63 | 12.439 | 2.590  | -4.230  | 1.00 | 0.00 |
| ATOM | 984 | CB   | CYX | 63 | 10.633 | 1.556  | -3.829  | 1.00 | 0.00 |
| ATOM | 985 | HB2  | CYX | 63 | 9.978  | 0.836  | -4.320  | 1.00 | 0.00 |
| ATOM | 986 | HB3  | CYX | 63 | 10.946 | 1.162  | -2.863  | 1.00 | 0.00 |
| ATOM | 987 | SG   | CYX | 63 | 9.702  | 3.106  | -3.707  | 1.00 | 0.00 |

|      |      |     |     |    |        |        |        |      |      |
|------|------|-----|-----|----|--------|--------|--------|------|------|
| ATOM | 988  | C   | CYX | 63 | 12.610 | 0.465  | -4.783 | 1.00 | 0.00 |
| ATOM | 989  | O   | CYX | 63 | 12.037 | -0.556 | -5.207 | 1.00 | 0.00 |
| ATOM | 990  | N   | PRO | 64 | 13.876 | 0.465  | -4.366 | 1.00 | 0.00 |
| ATOM | 991  | CD  | PRO | 64 | 14.537 | 1.483  | -3.520 | 1.00 | 0.00 |
| ATOM | 992  | HD2 | PRO | 64 | 13.815 | 1.880  | -2.805 | 1.00 | 0.00 |
| ATOM | 993  | HD3 | PRO | 64 | 14.903 | 2.292  | -4.152 | 1.00 | 0.00 |
| ATOM | 994  | CG  | PRO | 64 | 15.647 | 0.728  | -2.858 | 1.00 | 0.00 |
| ATOM | 995  | HG2 | PRO | 64 | 15.338 | 0.452  | -1.850 | 1.00 | 0.00 |
| ATOM | 996  | HG3 | PRO | 64 | 16.529 | 1.366  | -2.806 | 1.00 | 0.00 |
| ATOM | 997  | CB  | PRO | 64 | 15.912 | -0.487 | -3.703 | 1.00 | 0.00 |
| ATOM | 998  | HB2 | PRO | 64 | 16.275 | -1.314 | -3.093 | 1.00 | 0.00 |
| ATOM | 999  | HB3 | PRO | 64 | 16.637 | -0.268 | -4.487 | 1.00 | 0.00 |
| ATOM | 1000 | CA  | PRO | 64 | 14.570 | -0.852 | -4.324 | 1.00 | 0.00 |
| ATOM | 1001 | HA  | PRO | 64 | 14.638 | -1.193 | -5.357 | 1.00 | 0.00 |
| ATOM | 1002 | C   | PRO | 64 | 13.889 | -1.949 | -3.461 | 1.00 | 0.00 |
| ATOM | 1003 | O   | PRO | 64 | 13.781 | -3.138 | -3.866 | 1.00 | 0.00 |
| ATOM | 1004 | N   | PHE | 65 | 13.464 | -1.553 | -2.270 | 1.00 | 0.00 |
| ATOM | 1005 | H   | PHE | 65 | 13.474 | -0.567 | -2.050 | 1.00 | 0.00 |
| ATOM | 1006 | CA  | PHE | 65 | 13.106 | -2.489 | -1.221 | 1.00 | 0.00 |
| ATOM | 1007 | HA  | PHE | 65 | 13.012 | -1.966 | -0.269 | 1.00 | 0.00 |
| ATOM | 1008 | CB  | PHE | 65 | 11.759 | -3.156 | -1.551 | 1.00 | 0.00 |
| ATOM | 1009 | HB2 | PHE | 65 | 11.819 | -3.693 | -2.498 | 1.00 | 0.00 |

|      |      |         |    |        |        |        |      |      |
|------|------|---------|----|--------|--------|--------|------|------|
| ATOM | 1010 | HB3 PHE | 65 | 11.482 | -3.849 | -0.757 | 1.00 | 0.00 |
| ATOM | 1011 | CG PHE  | 65 | 10.605 | -2.162 | -1.685 | 1.00 | 0.00 |
| ATOM | 1012 | CD1 PHE | 65 | 10.405 | -1.165 | -0.721 | 1.00 | 0.00 |
| ATOM | 1013 | HD1 PHE | 65 | 11.095 | -1.098 | 0.120  | 1.00 | 0.00 |
| ATOM | 1014 | CE1 PHE | 65 | 9.364  | -0.284 | -0.823 | 1.00 | 0.00 |
| ATOM | 1015 | HE1 PHE | 65 | 9.214  | 0.498  | -0.078 | 1.00 | 0.00 |
| ATOM | 1016 | CZ PHE  | 65 | 8.507  | -0.394 | -1.876 | 1.00 | 0.00 |
| ATOM | 1017 | HZ PHE  | 65 | 7.666  | 0.296  | -1.947 | 1.00 | 0.00 |
| ATOM | 1018 | CE2 PHE | 65 | 8.686  | -1.338 | -2.823 | 1.00 | 0.00 |
| ATOM | 1019 | HE2 PHE | 65 | 7.983  | -1.405 | -3.654 | 1.00 | 0.00 |
| ATOM | 1020 | CD2 PHE | 65 | 9.743  | -2.210 | -2.747 | 1.00 | 0.00 |
| ATOM | 1021 | HD2 PHE | 65 | 9.900  | -2.946 | -3.535 | 1.00 | 0.00 |
| ATOM | 1022 | C PHE   | 65 | 14.221 | -3.534 | -0.929 | 1.00 | 0.00 |
| ATOM | 1023 | O PHE   | 65 | 13.915 | -4.627 | -0.482 | 1.00 | 0.00 |
| ATOM | 1024 | OXT PHE | 65 | 15.399 | -3.261 | -1.147 | 1.00 | 0.00 |
| TER  |      |         |    |        |        |        |      |      |
| ATOM | 1025 | N GLN   | 66 | 9.176  | 8.860  | 14.518 | 1.00 | 0.00 |
| ATOM | 1026 | H1 GLN  | 66 | 8.199  | 9.044  | 14.336 | 1.00 | 0.00 |
| ATOM | 1027 | H2 GLN  | 66 | 9.549  | 9.613  | 15.078 | 1.00 | 0.00 |
| ATOM | 1028 | H3 GLN  | 66 | 9.274  | 7.904  | 14.827 | 1.00 | 0.00 |
| ATOM | 1029 | CA GLN  | 66 | 9.914  | 8.933  | 13.215 | 1.00 | 0.00 |
| ATOM | 1030 | HA GLN  | 66 | 10.668 | 9.718  | 13.275 | 1.00 | 0.00 |



|      |      |      |     |    |        |        |        |      |      |
|------|------|------|-----|----|--------|--------|--------|------|------|
| ATOM | 1031 | CB   | GLN | 66 | 10.601 | 7.627  | 12.883 | 1.00 | 0.00 |
| ATOM | 1032 | HB2  | GLN | 66 | 11.025 | 7.248  | 13.812 | 1.00 | 0.00 |
| ATOM | 1033 | HB3  | GLN | 66 | 9.828  | 6.944  | 12.532 | 1.00 | 0.00 |
| ATOM | 1034 | CG   | GLN | 66 | 11.688 | 7.735  | 11.841 | 1.00 | 0.00 |
| ATOM | 1035 | HG2  | GLN | 66 | 11.858 | 8.796  | 11.656 | 1.00 | 0.00 |
| ATOM | 1036 | HG3  | GLN | 66 | 12.602 | 7.282  | 12.223 | 1.00 | 0.00 |
| ATOM | 1037 | CD   | GLN | 66 | 11.336 | 7.081  | 10.556 | 1.00 | 0.00 |
| ATOM | 1038 | OE1  | GLN | 66 | 10.057 | 6.951  | 10.299 | 1.00 | 0.00 |
| ATOM | 1039 | NE2  | GLN | 66 | 12.217 | 6.669  | 9.799  | 1.00 | 0.00 |
| ATOM | 1040 | HE21 | GLN | 66 | 11.963 | 6.226  | 8.927  | 1.00 | 0.00 |
| ATOM | 1041 | HE22 | GLN | 66 | 13.188 | 6.777  | 10.054 | 1.00 | 0.00 |
| ATOM | 1042 | C    | GLN | 66 | 9.053  | 9.390  | 12.052 | 1.00 | 0.00 |
| ATOM | 1043 | O    | GLN | 66 | 7.852  | 9.106  | 11.966 | 1.00 | 0.00 |
| ATOM | 1044 | N    | ARG | 67 | 9.714  | 10.139 | 11.174 | 1.00 | 0.00 |
| ATOM | 1045 | H    | ARG | 67 | 10.719 | 10.066 | 11.114 | 1.00 | 0.00 |
| ATOM | 1046 | CA   | ARG | 67 | 9.047  | 11.091 | 10.325 | 1.00 | 0.00 |
| ATOM | 1047 | HA   | ARG | 67 | 8.388  | 11.736 | 10.906 | 1.00 | 0.00 |
| ATOM | 1048 | CB   | ARG | 67 | 10.126 | 11.972 | 9.640  | 1.00 | 0.00 |
| ATOM | 1049 | HB2  | ARG | 67 | 10.731 | 12.380 | 10.449 | 1.00 | 0.00 |
| ATOM | 1050 | HB3  | ARG | 67 | 10.730 | 11.289 | 9.043  | 1.00 | 0.00 |
| ATOM | 1051 | CG   | ARG | 67 | 9.626  | 13.109 | 8.758  | 1.00 | 0.00 |
| ATOM | 1052 | HG2  | ARG | 67 | 10.494 | 13.606 | 8.324  | 1.00 | 0.00 |

|      |      |          |    |       |        |        |      |      |
|------|------|----------|----|-------|--------|--------|------|------|
| ATOM | 1053 | HG3 ARG  | 67 | 9.020 | 12.677 | 7.962  | 1.00 | 0.00 |
| ATOM | 1054 | CD ARG   | 67 | 8.794 | 14.126 | 9.535  | 1.00 | 0.00 |
| ATOM | 1055 | HD2 ARG  | 67 | 8.469 | 13.666 | 10.468 | 1.00 | 0.00 |
| ATOM | 1056 | HD3 ARG  | 67 | 9.422 | 14.989 | 9.756  | 1.00 | 0.00 |
| ATOM | 1057 | NE ARG   | 67 | 7.604 | 14.585 | 8.795  | 1.00 | 0.00 |
| ATOM | 1058 | HE ARG   | 67 | 7.703 | 14.622 | 7.790  | 1.00 | 0.00 |
| ATOM | 1059 | CZ ARG   | 67 | 6.431 | 14.954 | 9.337  | 1.00 | 0.00 |
| ATOM | 1060 | NH1 ARG  | 67 | 6.224 | 14.917 | 10.659 | 1.00 | 0.00 |
| ATOM | 1061 | HH11 ARG | 67 | 6.962 | 14.606 | 11.274 | 1.00 | 0.00 |
| ATOM | 1062 | HH12 ARG | 67 | 5.330 | 15.201 | 11.035 | 1.00 | 0.00 |
| ATOM | 1063 | NH2 ARG  | 67 | 5.437 | 15.364 | 8.543  | 1.00 | 0.00 |
| ATOM | 1064 | HH21 ARG | 67 | 5.573 | 15.394 | 7.542  | 1.00 | 0.00 |
| ATOM | 1065 | HH22 ARG | 67 | 4.554 | 15.642 | 8.947  | 1.00 | 0.00 |
| ATOM | 1066 | C ARG    | 67 | 8.185 | 10.305 | 9.294  | 1.00 | 0.00 |
| ATOM | 1067 | O ARG    | 67 | 6.988 | 10.565 | 9.122  | 1.00 | 0.00 |
| ATOM | 1068 | N CYX    | 68 | 8.840 | 9.339  | 8.687  | 1.00 | 0.00 |
| ATOM | 1069 | H CYX    | 68 | 9.800 | 9.133  | 8.924  | 1.00 | 0.00 |
| ATOM | 1070 | CA CYX   | 68 | 8.191 | 8.544  | 7.591  | 1.00 | 0.00 |
| ATOM | 1071 | HA CYX   | 68 | 7.827 | 9.213  | 6.810  | 1.00 | 0.00 |
| ATOM | 1072 | CB CYX   | 68 | 9.169 | 7.610  | 6.995  | 1.00 | 0.00 |
| ATOM | 1073 | HB2 CYX  | 68 | 9.583 | 6.971  | 7.774  | 1.00 | 0.00 |
| ATOM | 1074 | HB3 CYX  | 68 | 8.673 | 6.993  | 6.246  | 1.00 | 0.00 |

|      |      |      |     |    |        |       |        |      |      |
|------|------|------|-----|----|--------|-------|--------|------|------|
| ATOM | 1075 | SG   | CYX | 68 | 10.538 | 8.548 | 6.226  | 1.00 | 0.00 |
| ATOM | 1076 | C    | CYX | 68 | 7.015  | 7.802 | 8.149  | 1.00 | 0.00 |
| ATOM | 1077 | O    | CYX | 68 | 5.922  | 7.789 | 7.555  | 1.00 | 0.00 |
| ATOM | 1078 | N    | ARG | 69 | 7.147  | 7.260 | 9.370  | 1.00 | 0.00 |
| ATOM | 1079 | H    | ARG | 69 | 8.001  | 7.267 | 9.909  | 1.00 | 0.00 |
| ATOM | 1080 | CA   | ARG | 69 | 5.972  | 6.529 | 9.918  | 1.00 | 0.00 |
| ATOM | 1081 | HA   | ARG | 69 | 5.602  | 5.826 | 9.171  | 1.00 | 0.00 |
| ATOM | 1082 | CB   | ARG | 69 | 6.347  | 5.742 | 11.195 | 1.00 | 0.00 |
| ATOM | 1083 | HB2  | ARG | 69 | 6.734  | 6.436 | 11.941 | 1.00 | 0.00 |
| ATOM | 1084 | HB3  | ARG | 69 | 5.456  | 5.250 | 11.585 | 1.00 | 0.00 |
| ATOM | 1085 | CG   | ARG | 69 | 7.392  | 4.711 | 10.881 | 1.00 | 0.00 |
| ATOM | 1086 | HG2  | ARG | 69 | 7.070  | 4.170 | 9.991  | 1.00 | 0.00 |
| ATOM | 1087 | HG3  | ARG | 69 | 8.324  | 5.234 | 10.670 | 1.00 | 0.00 |
| ATOM | 1088 | CD   | ARG | 69 | 7.607  | 3.737 | 12.011 | 1.00 | 0.00 |
| ATOM | 1089 | HD2  | ARG | 69 | 6.678  | 3.211 | 12.233 | 1.00 | 0.00 |
| ATOM | 1090 | HD3  | ARG | 69 | 8.377  | 3.015 | 11.741 | 1.00 | 0.00 |
| ATOM | 1091 | NE   | ARG | 69 | 8.039  | 4.457 | 13.214 | 1.00 | 0.00 |
| ATOM | 1092 | HE   | ARG | 69 | 7.297  | 4.785 | 13.816 | 1.00 | 0.00 |
| ATOM | 1093 | CZ   | ARG | 69 | 9.305  | 4.698 | 13.571 | 1.00 | 0.00 |
| ATOM | 1094 | NH1  | ARG | 69 | 10.344 | 4.285 | 12.834 | 1.00 | 0.00 |
| ATOM | 1095 | HH11 | ARG | 69 | 10.180 | 3.774 | 11.978 | 1.00 | 0.00 |
| ATOM | 1096 | HH12 | ARG | 69 | 11.286 | 4.487 | 13.137 | 1.00 | 0.00 |

|      |      |      |     |    |        |        |        |      |      |
|------|------|------|-----|----|--------|--------|--------|------|------|
| ATOM | 1097 | NH2  | ARG | 69 | 9.520  | 5.382  | 14.695 | 1.00 | 0.00 |
| ATOM | 1098 | HH21 | ARG | 69 | 8.736  | 5.700  | 15.246 | 1.00 | 0.00 |
| ATOM | 1099 | HH22 | ARG | 69 | 10.465 | 5.579  | 14.989 | 1.00 | 0.00 |
| ATOM | 1100 | C    | ARG | 69 | 4.855  | 7.423  | 10.188 | 1.00 | 0.00 |
| ATOM | 1101 | O    | ARG | 69 | 3.701  | 7.109  | 9.959  | 1.00 | 0.00 |
| ATOM | 1102 | N    | HIE | 70 | 5.158  | 8.602  | 10.703 | 1.00 | 0.00 |
| ATOM | 1103 | H    | HIE | 70 | 6.108  | 8.858  | 10.932 | 1.00 | 0.00 |
| ATOM | 1104 | CA   | HIE | 70 | 4.142  | 9.531  | 10.954 | 1.00 | 0.00 |
| ATOM | 1105 | HA   | HIE | 70 | 3.379  | 9.078  | 11.588 | 1.00 | 0.00 |
| ATOM | 1106 | CB   | HIE | 70 | 4.699  | 10.770 | 11.667 | 1.00 | 0.00 |
| ATOM | 1107 | HB2  | HIE | 70 | 5.171  | 10.533 | 12.620 | 1.00 | 0.00 |
| ATOM | 1108 | HB3  | HIE | 70 | 5.425  | 11.249 | 11.011 | 1.00 | 0.00 |
| ATOM | 1109 | CG   | HIE | 70 | 3.641  | 11.794 | 11.956 | 1.00 | 0.00 |
| ATOM | 1110 | ND1  | HIE | 70 | 2.513  | 11.510 | 12.706 | 1.00 | 0.00 |
| ATOM | 1111 | CE1  | HIE | 70 | 1.749  | 12.587 | 12.769 | 1.00 | 0.00 |
| ATOM | 1112 | HE1  | HIE | 70 | 0.810  | 12.570 | 13.322 | 1.00 | 0.00 |
| ATOM | 1113 | NE2  | HIE | 70 | 2.335  | 13.556 | 12.083 | 1.00 | 0.00 |
| ATOM | 1114 | HE2  | HIE | 70 | 1.979  | 14.494 | 11.960 | 1.00 | 0.00 |
| ATOM | 1115 | CD2  | HIE | 70 | 3.514  | 13.085 | 11.558 | 1.00 | 0.00 |
| ATOM | 1116 | HD2  | HIE | 70 | 4.138  | 13.739 | 10.949 | 1.00 | 0.00 |
| ATOM | 1117 | C    | HIE | 70 | 3.460  | 9.998  | 9.655  | 1.00 | 0.00 |
| ATOM | 1118 | O    | HIE | 70 | 2.272  | 10.128 | 9.625  | 1.00 | 0.00 |

|      |      |      |     |    |       |        |       |      |      |
|------|------|------|-----|----|-------|--------|-------|------|------|
| ATOM | 1119 | N    | GLN | 71 | 4.226 | 10.203 | 8.613 | 1.00 | 0.00 |
| ATOM | 1120 | H    | GLN | 71 | 5.227 | 10.072 | 8.631 | 1.00 | 0.00 |
| ATOM | 1121 | CA   | GLN | 71 | 3.608 | 10.658 | 7.367 | 1.00 | 0.00 |
| ATOM | 1122 | HA   | GLN | 71 | 2.996 | 11.546 | 7.528 | 1.00 | 0.00 |
| ATOM | 1123 | CB   | GLN | 71 | 4.713 | 11.004 | 6.424 | 1.00 | 0.00 |
| ATOM | 1124 | HB2  | GLN | 71 | 5.465 | 10.216 | 6.462 | 1.00 | 0.00 |
| ATOM | 1125 | HB3  | GLN | 71 | 4.305 | 11.068 | 5.415 | 1.00 | 0.00 |
| ATOM | 1126 | CG   | GLN | 71 | 5.354 | 12.336 | 6.798 | 1.00 | 0.00 |
| ATOM | 1127 | HG2  | GLN | 71 | 4.556 | 13.077 | 6.861 | 1.00 | 0.00 |
| ATOM | 1128 | HG3  | GLN | 71 | 5.929 | 12.343 | 7.723 | 1.00 | 0.00 |
| ATOM | 1129 | CD   | GLN | 71 | 6.238 | 12.697 | 5.697 | 1.00 | 0.00 |
| ATOM | 1130 | OE1  | GLN | 71 | 5.751 | 12.902 | 4.621 | 1.00 | 0.00 |
| ATOM | 1131 | NE2  | GLN | 71 | 7.510 | 12.685 | 5.904 | 1.00 | 0.00 |
| ATOM | 1132 | HE21 | GLN | 71 | 8.142 | 12.932 | 5.156 | 1.00 | 0.00 |
| ATOM | 1133 | HE22 | GLN | 71 | 7.868 | 12.430 | 6.813 | 1.00 | 0.00 |
| ATOM | 1134 | C    | GLN | 71 | 2.699 | 9.577  | 6.735 | 1.00 | 0.00 |
| ATOM | 1135 | O    | GLN | 71 | 1.627 | 9.878  | 6.233 | 1.00 | 0.00 |
| ATOM | 1136 | N    | PHE | 72 | 3.115 | 8.333  | 6.854 | 1.00 | 0.00 |
| ATOM | 1137 | H    | PHE | 72 | 4.032 | 8.143  | 7.231 | 1.00 | 0.00 |
| ATOM | 1138 | CA   | PHE | 72 | 2.301 | 7.206  | 6.415 | 1.00 | 0.00 |
| ATOM | 1139 | HA   | PHE | 72 | 2.088 | 7.278  | 5.348 | 1.00 | 0.00 |
| ATOM | 1140 | CB   | PHE | 72 | 3.081 | 5.896  | 6.676 | 1.00 | 0.00 |

|      |      |         |    |        |       |        |      |      |
|------|------|---------|----|--------|-------|--------|------|------|
| ATOM | 1141 | HB2 PHE | 72 | 3.968  | 5.802 | 6.050  | 1.00 | 0.00 |
| ATOM | 1142 | HB3 PHE | 72 | 3.373  | 5.877 | 7.726  | 1.00 | 0.00 |
| ATOM | 1143 | CG PHE  | 72 | 2.260  | 4.674 | 6.439  | 1.00 | 0.00 |
| ATOM | 1144 | CD1 PHE | 72 | 1.998  | 4.248 | 5.119  | 1.00 | 0.00 |
| ATOM | 1145 | HD1 PHE | 72 | 2.413  | 4.802 | 4.277  | 1.00 | 0.00 |
| ATOM | 1146 | CE1 PHE | 72 | 1.215  | 3.130 | 4.893  | 1.00 | 0.00 |
| ATOM | 1147 | HE1 PHE | 72 | 0.977  | 2.854 | 3.865  | 1.00 | 0.00 |
| ATOM | 1148 | CZ PHE  | 72 | 0.736  | 2.368 | 5.941  | 1.00 | 0.00 |
| ATOM | 1149 | HZ PHE  | 72 | 0.161  | 1.461 | 5.756  | 1.00 | 0.00 |
| ATOM | 1150 | CE2 PHE | 72 | 1.002  | 2.782 | 7.275  | 1.00 | 0.00 |
| ATOM | 1151 | HE2 PHE | 72 | 0.591  | 2.224 | 8.116  | 1.00 | 0.00 |
| ATOM | 1152 | CD2 PHE | 72 | 1.787  | 3.900 | 7.503  | 1.00 | 0.00 |
| ATOM | 1153 | HD2 PHE | 72 | 2.044  | 4.187 | 8.522  | 1.00 | 0.00 |
| ATOM | 1154 | C PHE   | 72 | 0.947  | 7.155 | 7.122  | 1.00 | 0.00 |
| ATOM | 1155 | O PHE   | 72 | -0.094 | 7.142 | 6.522  | 1.00 | 0.00 |
| ATOM | 1156 | N GLN   | 73 | 0.988  | 7.298 | 8.466  | 1.00 | 0.00 |
| ATOM | 1157 | H GLN   | 73 | 1.800  | 6.798 | 8.797  | 1.00 | 0.00 |
| ATOM | 1158 | CA GLN  | 73 | -0.214 | 7.272 | 9.276  | 1.00 | 0.00 |
| ATOM | 1159 | HA GLN  | 73 | 0.254  | 7.483 | 10.237 | 1.00 | 0.00 |
| ATOM | 1160 | CB GLN  | 73 | 0.877  | 7.173 | 8.214  | 1.00 | 0.00 |
| ATOM | 1161 | HB2 GLN | 73 | 1.561  | 6.364 | 8.470  | 1.00 | 0.00 |
| ATOM | 1162 | HB3 GLN | 73 | 0.423  | 6.971 | 7.244  | 1.00 | 0.00 |

|      |      |      |     |    |        |        |       |      |      |
|------|------|------|-----|----|--------|--------|-------|------|------|
| ATOM | 1163 | CG   | GLN | 73 | 1.646  | 8.488  | 8.151 | 1.00 | 0.00 |
| ATOM | 1164 | HG2  | GLN | 73 | 0.963  | 9.297  | 7.895 | 1.00 | 0.00 |
| ATOM | 1165 | HG3  | GLN | 73 | 2.101  | 8.690  | 9.121 | 1.00 | 0.00 |
| ATOM | 1166 | CD   | GLN | 73 | 2.746  | 8.429  | 7.101 | 1.00 | 0.00 |
| ATOM | 1167 | OE1  | GLN | 73 | 2.920  | 7.411  | 6.436 | 1.00 | 0.00 |
| ATOM | 1168 | NE2  | GLN | 73 | 3.491  | 9.528  | 6.954 | 1.00 | 0.00 |
| ATOM | 1169 | HE21 | GLN | 73 | 4.235  | 9.542  | 6.270 | 1.00 | 0.00 |
| ATOM | 1170 | HE22 | GLN | 73 | 3.307  | 10.339 | 7.526 | 1.00 | 0.00 |
| ATOM | 1171 | C    | GLN | 73 | -1.127 | 8.455  | 8.903 | 1.00 | 0.00 |
| ATOM | 1172 | O    | GLN | 73 | -2.349 | 8.332  | 8.711 | 1.00 | 0.00 |
| ATOM | 1173 | N    | THR | 74 | -0.507 | 9.629  | 8.744 | 1.00 | 0.00 |
| ATOM | 1174 | H    | THR | 74 | 0.488  | 9.702  | 8.897 | 1.00 | 0.00 |
| ATOM | 1175 | CA   | THR | 74 | -1.232 | 10.820 | 8.411 | 1.00 | 0.00 |
| ATOM | 1176 | HA   | THR | 74 | -2.100 | 10.972 | 9.052 | 1.00 | 0.00 |
| ATOM | 1177 | CB   | THR | 74 | -0.323 | 12.056 | 8.513 | 1.00 | 0.00 |
| ATOM | 1178 | HB   | THR | 74 | 0.527  | 11.932 | 7.843 | 1.00 | 0.00 |
| ATOM | 1179 | CG2  | THR | 74 | -1.094 | 13.304 | 8.124 | 1.00 | 0.00 |
| ATOM | 1180 | HG21 | THR | 74 | -1.945 | 13.430 | 8.794 | 1.00 | 0.00 |
| ATOM | 1181 | HG22 | THR | 74 | -0.441 | 14.174 | 8.199 | 1.00 | 0.00 |
| ATOM | 1182 | HG23 | THR | 74 | -1.451 | 13.207 | 7.098 | 1.00 | 0.00 |
| ATOM | 1183 | OG1  | THR | 74 | 0.206  | 12.144 | 9.837 | 1.00 | 0.00 |
| ATOM | 1184 | HG1  | THR | 74 | 0.774  | 12.915 | 9.904 | 1.00 | 0.00 |

|      |      |      |     |    |        |        |       |      |      |
|------|------|------|-----|----|--------|--------|-------|------|------|
| ATOM | 1185 | C    | THR | 74 | -1.865 | 10.813 | 7.028 | 1.00 | 0.00 |
| ATOM | 1186 | O    | THR | 74 | -3.013 | 11.302 | 6.836 | 1.00 | 0.00 |
| ATOM | 1187 | N    | GLN | 75 | -1.182 | 10.168 | 6.061 | 1.00 | 0.00 |
| ATOM | 1188 | H    | GLN | 75 | -0.229 | 9.860  | 6.186 | 1.00 | 0.00 |
| ATOM | 1189 | CA   | GLN | 75 | -1.785 | 10.053 | 4.715 | 1.00 | 0.00 |
| ATOM | 1190 | HA   | GLN | 75 | -2.544 | 10.823 | 4.574 | 1.00 | 0.00 |
| ATOM | 1191 | CB   | GLN | 75 | -0.701 | 10.234 | 3.651 | 1.00 | 0.00 |
| ATOM | 1192 | HB2  | GLN | 75 | 0.019  | 9.429  | 3.793 | 1.00 | 0.00 |
| ATOM | 1193 | HB3  | GLN | 75 | -1.187 | 10.120 | 2.682 | 1.00 | 0.00 |
| ATOM | 1194 | CG   | GLN | 75 | 0.010  | 11.556 | 3.702 | 1.00 | 0.00 |
| ATOM | 1195 | HG2  | GLN | 75 | 0.584  | 11.590 | 4.628 | 1.00 | 0.00 |
| ATOM | 1196 | HG3  | GLN | 75 | 0.687  | 11.636 | 2.851 | 1.00 | 0.00 |
| ATOM | 1197 | CD   | GLN | 75 | -0.950 | 12.751 | 3.677 | 1.00 | 0.00 |
| ATOM | 1198 | OE1  | GLN | 75 | -1.972 | 12.723 | 3.003 | 1.00 | 0.00 |
| ATOM | 1199 | NE2  | GLN | 75 | -0.604 | 13.764 | 4.379 | 1.00 | 0.00 |
| ATOM | 1200 | HE21 | GLN | 75 | -1.195 | 14.583 | 4.404 | 1.00 | 0.00 |
| ATOM | 1201 | HE22 | GLN | 75 | 0.258  | 13.740 | 4.905 | 1.00 | 0.00 |
| ATOM | 1202 | C    | GLN | 75 | -2.609 | 8.760  | 4.538 | 1.00 | 0.00 |
| ATOM | 1203 | O    | GLN | 75 | -2.569 | 8.024  | 3.512 | 1.00 | 0.00 |
| ATOM | 1204 | N    | GLN | 76 | -3.442 | 8.486  | 5.533 | 1.00 | 0.00 |
| ATOM | 1205 | H    | GLN | 76 | -3.302 | 8.923  | 6.433 | 1.00 | 0.00 |
| ATOM | 1206 | CA   | GLN | 76 | -4.474 | 7.478  | 5.412 | 1.00 | 0.00 |



|      |      |      |     |    |        |        |       |      |      |
|------|------|------|-----|----|--------|--------|-------|------|------|
| ATOM | 1207 | HA   | GLN | 76 | -5.008 | 7.403  | 6.359 | 1.00 | 0.00 |
| ATOM | 1208 | CB   | GLN | 76 | -5.487 | 7.813  | 4.302 | 1.00 | 0.00 |
| ATOM | 1209 | HB2  | GLN | 76 | -5.152 | 7.233  | 3.442 | 1.00 | 0.00 |
| ATOM | 1210 | HB3  | GLN | 76 | -6.433 | 7.411  | 4.665 | 1.00 | 0.00 |
| ATOM | 1211 | CG   | GLN | 76 | -5.681 | 9.283  | 3.884 | 1.00 | 0.00 |
| ATOM | 1212 | HG2  | GLN | 76 | -4.746 | 9.647  | 3.459 | 1.00 | 0.00 |
| ATOM | 1213 | HG3  | GLN | 76 | -6.459 | 9.305  | 3.120 | 1.00 | 0.00 |
| ATOM | 1214 | CD   | GLN | 76 | -6.088 | 10.201 | 5.014 | 1.00 | 0.00 |
| ATOM | 1215 | OE1  | GLN | 76 | -5.469 | 11.245 | 5.244 | 1.00 | 0.00 |
| ATOM | 1216 | NE2  | GLN | 76 | -7.146 | 9.824  | 5.722 | 1.00 | 0.00 |
| ATOM | 1217 | HE21 | GLN | 76 | -7.466 | 10.397 | 6.490 | 1.00 | 0.00 |
| ATOM | 1218 | HE22 | GLN | 76 | -7.626 | 8.967  | 5.489 | 1.00 | 0.00 |
| ATOM | 1219 | C    | GLN | 76 | -3.831 | 6.109  | 5.231 | 1.00 | 0.00 |
| ATOM | 1220 | O    | GLN | 76 | -4.418 | 5.223  | 4.606 | 1.00 | 0.00 |
| ATOM | 1221 | N    | ARG | 77 | -2.635 | 5.906  | 5.773 | 1.00 | 0.00 |
| ATOM | 1222 | H    | ARG | 77 | -3.392 | 5.979  | 6.438 | 1.00 | 0.00 |
| ATOM | 1223 | CA   | ARG | 77 | -1.946 | 4.637  | 5.653 | 1.00 | 0.00 |
| ATOM | 1224 | HA   | ARG | 77 | -2.873 | 5.205  | 5.738 | 1.00 | 0.00 |
| ATOM | 1225 | CB   | ARG | 77 | -0.785 | 5.536  | 6.066 | 1.00 | 0.00 |
| ATOM | 1226 | HB2  | ARG | 77 | -0.922 | 5.857  | 7.099 | 1.00 | 0.00 |
| ATOM | 1227 | HB3  | ARG | 77 | 0.151  | 4.985  | 5.978 | 1.00 | 0.00 |
| ATOM | 1228 | CG   | ARG | 77 | -0.742 | 6.760  | 5.156 | 1.00 | 0.00 |

|      |      |          |    |        |        |       |      |      |
|------|------|----------|----|--------|--------|-------|------|------|
| ATOM | 1229 | HG2 ARG  | 77 | -0.604 | 6.440  | 4.123 | 1.00 | 0.00 |
| ATOM | 1230 | HG3 ARG  | 77 | -1.677 | 7.312  | 5.244 | 1.00 | 0.00 |
| ATOM | 1231 | CD ARG   | 77 | 0.419  | 7.659  | 5.569 | 1.00 | 0.00 |
| ATOM | 1232 | HD2 ARG  | 77 | 0.282  | 7.979  | 6.602 | 1.00 | 0.00 |
| ATOM | 1233 | HD3 ARG  | 77 | 1.355  | 7.107  | 5.481 | 1.00 | 0.00 |
| ATOM | 1234 | NE ARG   | 77 | 0.493  | 8.859  | 4.706 | 1.00 | 0.00 |
| ATOM | 1235 | HE ARG   | 77 | -0.190 | 8.966  | 3.969 | 1.00 | 0.00 |
| ATOM | 1236 | CZ ARG   | 77 | 1.417  | 9.804  | 4.857 | 1.00 | 0.00 |
| ATOM | 1237 | NH1 ARG  | 77 | 2.349  | 9.734  | 5.803 | 1.00 | 0.00 |
| ATOM | 1238 | HH11 ARG | 77 | 2.366  | 8.944  | 6.433 | 1.00 | 0.00 |
| ATOM | 1239 | HH12 ARG | 77 | 3.035  | 10.470 | 5.888 | 1.00 | 0.00 |
| ATOM | 1240 | NH2 ARG  | 77 | 1.391  | 10.841 | 4.025 | 1.00 | 0.00 |
| ATOM | 1241 | HH21 ARG | 77 | 0.682  | 10.891 | 3.307 | 1.00 | 0.00 |
| ATOM | 1242 | HH22 ARG | 77 | 2.080  | 11.574 | 4.115 | 1.00 | 0.00 |
| ATOM | 1243 | C ARG    | 77 | -1.742 | 4.255  | 4.201 | 1.00 | 0.00 |
| ATOM | 1244 | O ARG    | 77 | -1.660 | 3.082  | 3.859 | 1.00 | 0.00 |
| ATOM | 1245 | N LEU    | 78 | -1.677 | 5.272  | 3.345 | 1.00 | 0.00 |
| ATOM | 1246 | H LEU    | 78 | -1.722 | 6.228  | 3.668 | 1.00 | 0.00 |
| ATOM | 1247 | CA LEU   | 78 | -1.677 | 5.015  | 1.835 | 1.00 | 0.00 |
| ATOM | 1248 | HA LEU   | 78 | -2.007 | 5.912  | 1.310 | 1.00 | 0.00 |
| ATOM | 1249 | CB LEU   | 78 | -0.284 | 4.655  | 1.352 | 1.00 | 0.00 |
| ATOM | 1250 | HB2 LEU  | 78 | -0.121 | 3.711  | 1.871 | 1.00 | 0.00 |

|      |      |      |     |    |        |       |        |      |      |
|------|------|------|-----|----|--------|-------|--------|------|------|
| ATOM | 1251 | HB3  | LEU | 78 | -0.328 | 4.475 | 0.278  | 1.00 | 0.00 |
| ATOM | 1252 | CG   | LEU | 78 | 0.863  | 5.609 | 1.660  | 1.00 | 0.00 |
| ATOM | 1253 | HG   | LEU | 78 | 0.972  | 5.694 | 2.741  | 1.00 | 0.00 |
| ATOM | 1254 | CD1  | LEU | 78 | 2.151  | 5.098 | 1.063  | 1.00 | 0.00 |
| ATOM | 1255 | HD11 | LEU | 78 | 2.042  | 5.013 | -0.018 | 1.00 | 0.00 |
| ATOM | 1256 | HD12 | LEU | 78 | 2.959  | 5.792 | 1.293  | 1.00 | 0.00 |
| ATOM | 1257 | HD13 | LEU | 78 | 2.383  | 4.119 | 1.482  | 1.00 | 0.00 |
| ATOM | 1258 | CD2  | LEU | 78 | 0.497  | 7.042 | 1.171  | 1.00 | 0.00 |
| ATOM | 1259 | HD21 | LEU | 78 | -0.404 | 7.382 | 1.682  | 1.00 | 0.00 |
| ATOM | 1260 | HD22 | LEU | 78 | 1.319  | 7.723 | 1.392  | 1.00 | 0.00 |
| ATOM | 1261 | HD23 | LEU | 78 | 0.319  | 7.026 | 0.095  | 1.00 | 0.00 |
| ATOM | 1262 | C    | LEU | 78 | -2.713 | 3.980 | 1.460  | 1.00 | 0.00 |
| ATOM | 1263 | O    | LEU | 78 | -2.497 | 3.064 | 0.606  | 1.00 | 0.00 |
| ATOM | 1264 | N    | ARG | 79 | -3.916 | 4.108 | 2.053  | 1.00 | 0.00 |
| ATOM | 1265 | H    | ARG | 79 | -4.109 | 4.880 | 2.676  | 1.00 | 0.00 |
| ATOM | 1266 | CA   | ARG | 79 | -4.958 | 3.110 | 1.846  | 1.00 | 0.00 |
| ATOM | 1267 | HA   | ARG | 79 | -4.629 | 2.138 | 2.213  | 1.00 | 0.00 |
| ATOM | 1268 | CB   | ARG | 79 | -6.213 | 3.518 | 2.608  | 1.00 | 0.00 |
| ATOM | 1269 | HB2  | ARG | 79 | -5.885 | 3.928 | 3.563  | 1.00 | 0.00 |
| ATOM | 1270 | HB3  | ARG | 79 | -6.698 | 4.301 | 2.024  | 1.00 | 0.00 |
| ATOM | 1271 | CG   | ARG | 79 | -7.188 | 2.399 | 2.852  | 1.00 | 0.00 |
| ATOM | 1272 | HG2  | ARG | 79 | -7.627 | 2.082 | 1.906  | 1.00 | 0.00 |

|      |      |          |    |        |       |        |      |      |
|------|------|----------|----|--------|-------|--------|------|------|
| ATOM | 1273 | HG3 ARG  | 79 | -6.673 | 1.557 | 3.313  | 1.00 | 0.00 |
| ATOM | 1274 | CD ARG   | 79 | -8.302 | 2.897 | 3.794  | 1.00 | 0.00 |
| ATOM | 1275 | HD2 ARG  | 79 | -9.014 | 3.504 | 3.234  | 1.00 | 0.00 |
| ATOM | 1276 | HD3 ARG  | 79 | -8.820 | 2.045 | 4.234  | 1.00 | 0.00 |
| ATOM | 1277 | NE ARG   | 79 | -7.731 | 3.720 | 4.884  | 1.00 | 0.00 |
| ATOM | 1278 | HE ARG   | 79 | -6.875 | 3.360 | 5.281  | 1.00 | 0.00 |
| ATOM | 1279 | CZ ARG   | 79 | -8.233 | 4.865 | 5.375  | 1.00 | 0.00 |
| ATOM | 1280 | NH1 ARG  | 79 | -9.373 | 5.391 | 4.912  | 1.00 | 0.00 |
| ATOM | 1281 | HH11 ARG | 79 | -9.879 | 4.923 | 4.173  | 1.00 | 0.00 |
| ATOM | 1282 | HH12 ARG | 79 | -9.723 | 6.254 | 5.303  | 1.00 | 0.00 |
| ATOM | 1283 | NH2 ARG  | 79 | -7.581 | 5.502 | 6.354  | 1.00 | 0.00 |
| ATOM | 1284 | HH21 ARG | 79 | -6.720 | 5.119 | 6.715  | 1.00 | 0.00 |
| ATOM | 1285 | HH22 ARG | 79 | -7.954 | 6.364 | 6.727  | 1.00 | 0.00 |
| ATOM | 1286 | C ARG    | 79 | -5.320 | 2.895 | 0.376  | 1.00 | 0.00 |
| ATOM | 1287 | O ARG    | 79 | -5.476 | 1.811 | -0.059 | 1.00 | 0.00 |
| ATOM | 1288 | N ALA    | 80 | -5.298 | 3.939 | -0.440 | 1.00 | 0.00 |
| ATOM | 1289 | H ALA    | 80 | -5.161 | 4.891 | -0.133 | 1.00 | 0.00 |
| ATOM | 1290 | CA ALA   | 80 | -5.541 | 3.700 | -1.851 | 1.00 | 0.00 |
| ATOM | 1291 | HA ALA   | 80 | -6.430 | 3.073 | -1.927 | 1.00 | 0.00 |
| ATOM | 1292 | CB ALA   | 80 | -5.807 | 5.013 | -2.582 | 1.00 | 0.00 |
| ATOM | 1293 | HB1 ALA  | 80 | -4.923 | 5.648 | -2.523 | 1.00 | 0.00 |
| ATOM | 1294 | HB2 ALA  | 80 | -6.037 | 4.808 | -3.628 | 1.00 | 0.00 |

|      |      |     |     |    |        |        |        |      |      |
|------|------|-----|-----|----|--------|--------|--------|------|------|
| ATOM | 1295 | HB3 | ALA | 80 | -6.652 | 5.523  | -2.119 | 1.00 | 0.00 |
| ATOM | 1296 | C   | ALA | 80 | -4.403 | 2.983  | -2.530 | 1.00 | 0.00 |
| ATOM | 1297 | O   | ALA | 80 | -4.680 | 2.160  | -3.439 | 1.00 | 0.00 |
| ATOM | 1298 | N   | CYX | 81 | -3.158 | 3.188  | -2.133 | 1.00 | 0.00 |
| ATOM | 1299 | H   | CYX | 81 | -2.966 | 3.866  | -1.409 | 1.00 | 0.00 |
| ATOM | 1300 | CA  | CYX | 81 | -2.044 | 2.463  | -2.708 | 1.00 | 0.00 |
| ATOM | 1301 | HA  | CYX | 81 | -2.116 | 2.551  | -3.792 | 1.00 | 0.00 |
| ATOM | 1302 | CB  | CYX | 81 | -0.709 | 2.942  | -2.282 | 1.00 | 0.00 |
| ATOM | 1303 | HB2 | CYX | 81 | -0.601 | 2.808  | -1.206 | 1.00 | 0.00 |
| ATOM | 1304 | HB3 | CYX | 81 | 0.063  | 2.373  | -2.799 | 1.00 | 0.00 |
| ATOM | 1305 | SG  | CYX | 81 | -0.565 | 4.771  | -2.700 | 1.00 | 0.00 |
| ATOM | 1306 | C   | CYX | 81 | -2.136 | 0.984  | -2.303 | 1.00 | 0.00 |
| ATOM | 1307 | O   | CYX | 81 | -1.834 | 0.100  | -3.029 | 1.00 | 0.00 |
| ATOM | 1308 | N   | GLN | 82 | -2.624 | 0.785  | -1.058 | 1.00 | 0.00 |
| ATOM | 1309 | H   | GLN | 82 | -2.841 | 1.527  | -0.408 | 1.00 | 0.00 |
| ATOM | 1310 | CA  | GLN | 82 | -2.811 | -0.602 | -0.619 | 1.00 | 0.00 |
| ATOM | 1311 | HA  | GLN | 82 | -1.858 | -1.127 | -0.680 | 1.00 | 0.00 |
| ATOM | 1312 | CB  | GLN | 82 | -3.321 | -0.679 | 0.824  | 1.00 | 0.00 |
| ATOM | 1313 | HB2 | GLN | 82 | -4.241 | -0.095 | 0.854  | 1.00 | 0.00 |
| ATOM | 1314 | HB3 | GLN | 82 | -3.551 | -1.728 | 1.011  | 1.00 | 0.00 |
| ATOM | 1315 | CG  | GLN | 82 | -2.379 | -0.180 | 1.873  | 1.00 | 0.00 |
| ATOM | 1316 | HG2 | GLN | 82 | -1.459 | -0.763 | 1.858  | 1.00 | 0.00 |

|      |      |      |     |    |         |        |        |      |      |
|------|------|------|-----|----|---------|--------|--------|------|------|
| ATOM | 1317 | HG3  | GLN | 82 | -2.143  | 0.875  | 1.728  | 1.00 | 0.00 |
| ATOM | 1318 | CD   | GLN | 82 | -3.040  | -0.348 | 3.235  | 1.00 | 0.00 |
| ATOM | 1319 | OE1  | GLN | 82 | -3.652  | -1.375 | 3.483  | 1.00 | 0.00 |
| ATOM | 1320 | NE2  | GLN | 82 | -2.933  | 0.650  | 4.097  | 1.00 | 0.00 |
| ATOM | 1321 | HE21 | GLN | 82 | -3.359  | 0.573  | 5.009  | 1.00 | 0.00 |
| ATOM | 1322 | HE22 | GLN | 82 | -2.426  | 1.485  | 3.838  | 1.00 | 0.00 |
| ATOM | 1323 | C    | GLN | 82 | -3.781  | -1.293 | -1.532 | 1.00 | 0.00 |
| ATOM | 1324 | O    | GLN | 82 | -3.485  | -2.432 | -1.902 | 1.00 | 0.00 |
| ATOM | 1325 | N    | ARG | 83 | -4.850  | -0.633 | -1.939 | 1.00 | 0.00 |
| ATOM | 1326 | H    | ARG | 83 | -5.025  | 0.250  | -1.480 | 1.00 | 0.00 |
| ATOM | 1327 | CA   | ARG | 83 | -5.830  | -1.122 | -2.872 | 1.00 | 0.00 |
| ATOM | 1328 | HA   | ARG | 83 | -6.169  | -2.105 | -2.547 | 1.00 | 0.00 |
| ATOM | 1329 | CB   | ARG | 83 | -7.021  | -0.214 | -2.972 | 1.00 | 0.00 |
| ATOM | 1330 | HB2  | ARG | 83 | -6.583  | 0.764  | -3.175 | 1.00 | 0.00 |
| ATOM | 1331 | HB3  | ARG | 83 | -7.542  | -0.569 | -3.862 | 1.00 | 0.00 |
| ATOM | 1332 | CG   | ARG | 83 | -8.010  | -0.098 | -1.817 | 1.00 | 0.00 |
| ATOM | 1333 | HG2  | ARG | 83 | -8.352  | -1.098 | -1.551 | 1.00 | 0.00 |
| ATOM | 1334 | HG3  | ARG | 83 | -7.498  | 0.350  | -0.965 | 1.00 | 0.00 |
| ATOM | 1335 | CD   | ARG | 83 | -9.222  | 0.773  | -2.203 | 1.00 | 0.00 |
| ATOM | 1336 | HD2  | ARG | 83 | -8.965  | 1.393  | -3.062 | 1.00 | 0.00 |
| ATOM | 1337 | HD3  | ARG | 83 | -10.065 | 0.131  | -2.459 | 1.00 | 0.00 |
| ATOM | 1338 | NE   | ARG | 83 | -9.619  | 1.652  | -1.088 | 1.00 | 0.00 |

|      |      |      |     |    |         |        |        |      |      |
|------|------|------|-----|----|---------|--------|--------|------|------|
| ATOM | 1339 | HE   | ARG | 83 | -9.426  | 2.637  | -1.205 | 1.00 | 0.00 |
| ATOM | 1340 | CZ   | ARG | 83 | -10.218 | 1.248  | 0.040  | 1.00 | 0.00 |
| ATOM | 1341 | NH1  | ARG | 83 | -10.515 | -0.037 | 0.245  | 1.00 | 0.00 |
| ATOM | 1342 | HH11 | ARG | 83 | -10.287 | -0.723 | -0.460 | 1.00 | 0.00 |
| ATOM | 1343 | HH12 | ARG | 83 | -10.967 | -0.317 | 1.104  | 1.00 | 0.00 |
| ATOM | 1344 | NH2  | ARG | 83 | -10.516 | 2.138  | 0.991  | 1.00 | 0.00 |
| ATOM | 1345 | HH21 | ARG | 83 | -10.289 | 3.113  | 0.855  | 1.00 | 0.00 |
| ATOM | 1346 | HH22 | ARG | 83 | -10.968 | 1.832  | 1.841  | 1.00 | 0.00 |
| ATOM | 1347 | C    | ARG | 83 | -5.218  | -1.410 | -4.276 | 1.00 | 0.00 |
| ATOM | 1348 | O    | ARG | 83 | -5.409  | -2.483 | -4.853 | 1.00 | 0.00 |
| ATOM | 1349 | N    | VAL | 84 | -4.381  | -0.485 | -4.731 | 1.00 | 0.00 |
| ATOM | 1350 | H    | VAL | 84 | -4.345  | 0.429  | -4.302 | 1.00 | 0.00 |
| ATOM | 1351 | CA   | VAL | 84 | -3.634  | -0.700 | -5.957 | 1.00 | 0.00 |
| ATOM | 1352 | HA   | VAL | 84 | -4.309  | -0.967 | -6.771 | 1.00 | 0.00 |
| ATOM | 1353 | CB   | VAL | 84 | -2.836  | 0.547  | -6.370 | 1.00 | 0.00 |
| ATOM | 1354 | HB   | VAL | 84 | -2.230  | 0.847  | -5.516 | 1.00 | 0.00 |
| ATOM | 1355 | CG1  | VAL | 84 | -1.924  | 0.312  | -7.590 | 1.00 | 0.00 |
| ATOM | 1356 | HG11 | VAL | 84 | -2.530  | 0.013  | -8.445 | 1.00 | 0.00 |
| ATOM | 1357 | HG12 | VAL | 84 | -1.390  | 1.232  | -7.828 | 1.00 | 0.00 |
| ATOM | 1358 | HG13 | VAL | 84 | -1.206  | -0.475 | -7.361 | 1.00 | 0.00 |
| ATOM | 1359 | CG2  | VAL | 84 | -3.851  | 1.642  | -6.675 | 1.00 | 0.00 |
| ATOM | 1360 | HG21 | VAL | 84 | -4.448  | 1.843  | -5.785 | 1.00 | 0.00 |

|      |      |      |     |    |        |        |        |      |      |
|------|------|------|-----|----|--------|--------|--------|------|------|
| ATOM | 1361 | HG22 | VAL | 84 | -3.328 | 2.551  | -6.974 | 1.00 | 0.00 |
| ATOM | 1362 | HG23 | VAL | 84 | -4.505 | 1.317  | -7.485 | 1.00 | 0.00 |
| ATOM | 1363 | C    | VAL | 84 | -2.794 | -1.937 | -5.892 | 1.00 | 0.00 |
| ATOM | 1364 | O    | VAL | 84 | -2.674 | -2.748 | -6.840 | 1.00 | 0.00 |
| ATOM | 1365 | N    | ILE | 85 | -2.009 | -2.065 | -4.824 | 1.00 | 0.00 |
| ATOM | 1366 | H    | ILE | 85 | -2.094 | -1.410 | -4.059 | 1.00 | 0.00 |
| ATOM | 1367 | CA   | ILE | 85 | -1.056 | -3.140 | -4.702 | 1.00 | 0.00 |
| ATOM | 1368 | HA   | ILE | 85 | -0.349 | -3.173 | -5.531 | 1.00 | 0.00 |
| ATOM | 1369 | CB   | ILE | 85 | -0.285 | -2.976 | -3.375 | 1.00 | 0.00 |
| ATOM | 1370 | HB   | ILE | 85 | -0.990 | -2.663 | -2.605 | 1.00 | 0.00 |
| ATOM | 1371 | CG2  | ILE | 85 | 0.385  | -4.267 | -2.952 | 1.00 | 0.00 |
| ATOM | 1372 | HG21 | ILE | 85 | 1.090  | -4.580 | -3.722 | 1.00 | 0.00 |
| ATOM | 1373 | HG22 | ILE | 85 | 0.917  | -4.110 | -2.014 | 1.00 | 0.00 |
| ATOM | 1374 | HG23 | ILE | 85 | -0.370 | -5.041 | -2.816 | 1.00 | 0.00 |
| ATOM | 1375 | CG1  | ILE | 85 | 0.714  | -1.882 | -3.474 | 1.00 | 0.00 |
| ATOM | 1376 | HG12 | ILE | 85 | 1.618  | -2.298 | -3.918 | 1.00 | 0.00 |
| ATOM | 1377 | HG13 | ILE | 85 | 0.304  | -1.117 | -4.134 | 1.00 | 0.00 |
| ATOM | 1378 | CD1  | ILE | 85 | 1.045  | -1.270 | -2.146 | 1.00 | 0.00 |
| ATOM | 1379 | HD11 | ILE | 85 | 1.455  | -2.034 | -1.486 | 1.00 | 0.00 |
| ATOM | 1380 | HD12 | ILE | 85 | 1.780  | -0.477 | -2.284 | 1.00 | 0.00 |
| ATOM | 1381 | HD13 | ILE | 85 | 0.141  | -0.853 | -1.702 | 1.00 | 0.00 |
| ATOM | 1382 | C    | ILE | 85 | -1.910 | -4.456 | -4.673 | 1.00 | 0.00 |



|      |      |      |     |    |        |        |        |      |      |
|------|------|------|-----|----|--------|--------|--------|------|------|
| ATOM | 1383 | O    | ILE | 85 | -1.497 | -5.406 | -5.324 | 1.00 | 0.00 |
| ATOM | 1384 | N    | GLN | 86 | -3.011 | -4.491 | -3.977 | 1.00 | 0.00 |
| ATOM | 1385 | H    | GLN | 86 | -3.285 | -3.704 | -3.406 | 1.00 | 0.00 |
| ATOM | 1386 | CA   | GLN | 86 | -3.869 | -5.726 | -3.948 | 1.00 | 0.00 |
| ATOM | 1387 | HA   | GLN | 86 | -3.271 | -6.598 | -3.685 | 1.00 | 0.00 |
| ATOM | 1388 | CB   | GLN | 86 | -4.941 | -5.558 | -2.925 | 1.00 | 0.00 |
| ATOM | 1389 | HB2  | GLN | 86 | -5.418 | -4.589 | -3.078 | 1.00 | 0.00 |
| ATOM | 1390 | HB3  | GLN | 86 | -5.678 | -6.350 | -3.061 | 1.00 | 0.00 |
| ATOM | 1391 | CG   | GLN | 86 | -4.369 | -5.629 | -1.499 | 1.00 | 0.00 |
| ATOM | 1392 | HG2  | GLN | 86 | -3.639 | -6.419 | -1.327 | 1.00 | 0.00 |
| ATOM | 1393 | HG3  | GLN | 86 | -3.903 | -4.659 | -1.326 | 1.00 | 0.00 |
| ATOM | 1394 | CD   | GLN | 86 | -5.515 | -5.801 | -0.510 | 1.00 | 0.00 |
| ATOM | 1395 | OE1  | GLN | 86 | -6.059 | -4.821 | 0.060  | 1.00 | 0.00 |
| ATOM | 1396 | NE2  | GLN | 86 | -5.975 | -7.037 | -0.394 | 1.00 | 0.00 |
| ATOM | 1397 | HE21 | GLN | 86 | -6.735 | -7.232 | 0.242  | 1.00 | 0.00 |
| ATOM | 1398 | HE22 | GLN | 86 | -5.564 | -7.779 | -0.942 | 1.00 | 0.00 |
| ATOM | 1399 | C    | GLN | 86 | -4.464 | -6.012 | -5.343 | 1.00 | 0.00 |
| ATOM | 1400 | O    | GLN | 86 | -4.449 | -7.129 | -5.790 | 1.00 | 0.00 |
| ATOM | 1401 | N    | ARG | 87 | -4.907 | -4.957 | -6.006 | 1.00 | 0.00 |
| ATOM | 1402 | H    | ARG | 87 | -4.826 | -4.041 | -5.587 | 1.00 | 0.00 |
| ATOM | 1403 | CA   | ARG | 87 | -5.530 | -5.064 | -7.384 | 1.00 | 0.00 |
| ATOM | 1404 | HA   | ARG | 87 | -6.496 | -5.568 | -7.345 | 1.00 | 0.00 |

|      |      |      |     |    |        |        |         |      |      |
|------|------|------|-----|----|--------|--------|---------|------|------|
| ATOM | 1405 | CB   | ARG | 87 | -5.741 | -3.654 | -7.895  | 1.00 | 0.00 |
| ATOM | 1406 | HB2  | ARG | 87 | -6.571 | -3.208 | -7.347  | 1.00 | 0.00 |
| ATOM | 1407 | HB3  | ARG | 87 | -4.834 | -3.079 | -7.710  | 1.00 | 0.00 |
| ATOM | 1408 | CG   | ARG | 87 | -6.055 | -3.642 | -9.392  | 1.00 | 0.00 |
| ATOM | 1409 | HG2  | ARG | 87 | -5.252 | -4.122 | -9.951  | 1.00 | 0.00 |
| ATOM | 1410 | HG3  | ARG | 87 | -6.993 | -4.162 | -9.586  | 1.00 | 0.00 |
| ATOM | 1411 | CD   | ARG | 87 | -6.179 | -2.214 | -9.825  | 1.00 | 0.00 |
| ATOM | 1412 | HD2  | ARG | 87 | -5.363 | -1.623 | -9.409  | 1.00 | 0.00 |
| ATOM | 1413 | HD3  | ARG | 87 | -6.157 | -2.148 | -10.913 | 1.00 | 0.00 |
| ATOM | 1414 | NE   | ARG | 87 | -7.434 | -1.667 | -9.353  | 1.00 | 0.00 |
| ATOM | 1415 | HE   | ARG | 87 | -8.119 | -2.296 | -8.960  | 1.00 | 0.00 |
| ATOM | 1416 | CZ   | ARG | 87 | -7.697 | -0.344 | -9.346  | 1.00 | 0.00 |
| ATOM | 1417 | NH1  | ARG | 87 | -6.817 | 0.536  | -9.805  | 1.00 | 0.00 |
| ATOM | 1418 | HH11 | ARG | 87 | -5.931 | 0.217  | -10.169 | 1.00 | 0.00 |
| ATOM | 1419 | HH12 | ARG | 87 | -7.038 | 1.522  | -9.789  | 1.00 | 0.00 |
| ATOM | 1420 | NH2  | ARG | 87 | -8.928 | 0.084  | -8.929  | 1.00 | 0.00 |
| ATOM | 1421 | HH21 | ARG | 87 | -9.620 | -0.589 | -8.634  | 1.00 | 0.00 |
| ATOM | 1422 | HH22 | ARG | 87 | -9.139 | 1.072  | -8.919  | 1.00 | 0.00 |
| ATOM | 1423 | C    | ARG | 87 | -4.616 | -5.815 | -8.325  | 1.00 | 0.00 |
| ATOM | 1424 | O    | ARG | 87 | -5.054 | -6.708 | -9.014  | 1.00 | 0.00 |
| ATOM | 1425 | N    | TRP | 88 | -3.312 | -5.522 | -8.341  | 1.00 | 0.00 |
| ATOM | 1426 | H    | TRP | 88 | -3.011 | -4.779 | -7.727  | 1.00 | 0.00 |

|      |      |     |     |    |        |        |         |      |      |
|------|------|-----|-----|----|--------|--------|---------|------|------|
| ATOM | 1427 | CA  | TRP | 88 | -2.334 | -6.104 | -9.256  | 1.00 | 0.00 |
| ATOM | 1428 | HA  | TRP | 88 | -2.834 | -6.495 | -10.142 | 1.00 | 0.00 |
| ATOM | 1429 | CB  | TRP | 88 | -1.352 | -5.049 | -9.685  | 1.00 | 0.00 |
| ATOM | 1430 | HB2 | TRP | 88 | -1.067 | -4.510 | -8.782  | 1.00 | 0.00 |
| ATOM | 1431 | HB3 | TRP | 88 | -0.455 | -5.376 | -10.211 | 1.00 | 0.00 |
| ATOM | 1432 | CG  | TRP | 88 | -2.041 | -4.049 | -10.586 | 1.00 | 0.00 |
| ATOM | 1433 | CD1 | TRP | 88 | -2.555 | -2.819 | -10.266 | 1.00 | 0.00 |
| ATOM | 1434 | HD1 | TRP | 88 | -2.395 | -2.460 | -9.250  | 1.00 | 0.00 |
| ATOM | 1435 | NE1 | TRP | 88 | -3.176 | -2.298 | -11.330 | 1.00 | 0.00 |
| ATOM | 1436 | HE1 | TRP | 88 | -3.561 | -1.365 | -11.378 | 1.00 | 0.00 |
| ATOM | 1437 | CE2 | TRP | 88 | -3.127 | -3.199 | -12.373 | 1.00 | 0.00 |
| ATOM | 1438 | CZ2 | TRP | 88 | -3.606 | -3.104 | -13.687 | 1.00 | 0.00 |
| ATOM | 1439 | HZ2 | TRP | 88 | -4.106 | -2.191 | -14.013 | 1.00 | 0.00 |
| ATOM | 1440 | CH2 | TRP | 88 | -3.412 | -4.164 | -14.466 | 1.00 | 0.00 |
| ATOM | 1441 | HH2 | TRP | 88 | -3.854 | -4.154 | -15.463 | 1.00 | 0.00 |
| ATOM | 1442 | CZ3 | TRP | 88 | -2.681 | -5.267 | -14.068 | 1.00 | 0.00 |
| ATOM | 1443 | HZ3 | TRP | 88 | -2.484 | -6.096 | -14.747 | 1.00 | 0.00 |
| ATOM | 1444 | CE3 | TRP | 88 | -2.188 | -5.344 | -12.814 | 1.00 | 0.00 |
| ATOM | 1445 | HE3 | TRP | 88 | -1.659 | -6.251 | -12.521 | 1.00 | 0.00 |
| ATOM | 1446 | CD2 | TRP | 88 | -2.404 | -4.287 | -11.951 | 1.00 | 0.00 |
| ATOM | 1447 | C   | TRP | 88 | -1.622 | -7.317 | -8.751  | 1.00 | 0.00 |
| ATOM | 1448 | O   | TRP | 88 | -0.785 | -7.820 | -9.449  | 1.00 | 0.00 |

|      |      |     |     |    |        |         |        |      |      |
|------|------|-----|-----|----|--------|---------|--------|------|------|
| ATOM | 1449 | N   | SER | 89 | -2.108 | -7.829  | -7.639 | 1.00 | 0.00 |
| ATOM | 1450 | H   | SER | 89 | -2.882 | -7.340  | -7.212 | 1.00 | 0.00 |
| ATOM | 1451 | CA  | SER | 89 | -1.552 | -8.981  | -6.945 | 1.00 | 0.00 |
| ATOM | 1452 | HA  | SER | 89 | -0.703 | -9.393  | -7.490 | 1.00 | 0.00 |
| ATOM | 1453 | CB  | SER | 89 | -1.063 | -8.510  | -5.543 | 1.00 | 0.00 |
| ATOM | 1454 | HB2 | SER | 89 | -1.862 | -7.995  | -5.010 | 1.00 | 0.00 |
| ATOM | 1455 | HB3 | SER | 89 | -0.719 | -9.357  | -4.951 | 1.00 | 0.00 |
| ATOM | 1456 | OG  | SER | 89 | 0.025  | -7.606  | -5.759 | 1.00 | 0.00 |
| ATOM | 1457 | HG  | SER | 89 | 0.354  | -7.293  | -4.913 | 1.00 | 0.00 |
| ATOM | 1458 | C   | SER | 89 | -2.519 | -10.127 | -6.853 | 1.00 | 0.00 |
| ATOM | 1459 | O   | SER | 89 | -2.260 | -11.047 | -6.130 | 1.00 | 0.00 |
| ATOM | 1460 | N   | GLN | 90 | -3.628 | -10.087 | -7.568 | 1.00 | 0.00 |
| ATOM | 1461 | H   | GLN | 90 | -3.840 | -9.291  | -8.153 | 1.00 | 0.00 |
| ATOM | 1462 | CA  | GLN | 90 | -4.626 | -11.177 | -7.478 | 1.00 | 0.00 |
| ATOM | 1463 | HA  | GLN | 90 | -4.884 | -11.344 | -6.432 | 1.00 | 0.00 |
| ATOM | 1464 | CB  | GLN | 90 | -5.914 | -10.829 | -8.254 | 1.00 | 0.00 |
| ATOM | 1465 | HB2 | GLN | 90 | -5.732 | -11.114 | -9.290 | 1.00 | 0.00 |
| ATOM | 1466 | HB3 | GLN | 90 | -6.700 | -11.458 | -7.837 | 1.00 | 0.00 |
| ATOM | 1467 | CG  | GLN | 90 | -6.352 | -9.361  | -8.198 | 1.00 | 0.00 |
| ATOM | 1468 | HG2 | GLN | 90 | -6.050 | -8.975  | -7.224 | 1.00 | 0.00 |
| ATOM | 1469 | HG3 | GLN | 90 | -5.806 | -8.836  | -8.982 | 1.00 | 0.00 |
| ATOM | 1470 | CD  | GLN | 90 | -7.827 | -9.102  | -8.382 | 1.00 | 0.00 |

|      |      |      |     |    |        |         |        |      |      |
|------|------|------|-----|----|--------|---------|--------|------|------|
| ATOM | 1471 | OE1  | GLN | 90 | -8.625 | -10.023 | -8.583 | 1.00 | 0.00 |
| ATOM | 1472 | NE2  | GLN | 90 | -8.206 | -7.818  | -8.313 | 1.00 | 0.00 |
| ATOM | 1473 | HE21 | GLN | 90 | -9.180 | -7.575  | -8.428 | 1.00 | 0.00 |
| ATOM | 1474 | HE22 | GLN | 90 | -7.516 | -7.099  | -8.147 | 1.00 | 0.00 |
| ATOM | 1475 | C    | GLN | 90 | -4.052 | -12.521 | -7.992 | 1.00 | 0.00 |
| ATOM | 1476 | O    | GLN | 90 | -4.046 | -13.539 | -7.276 | 1.00 | 0.00 |
| ATOM | 1477 | OXT  | GLN | 90 | -3.593 | -12.583 | -9.130 | 1.00 | 0.00 |

TER

|      |      |     |     |    |        |         |        |      |      |
|------|------|-----|-----|----|--------|---------|--------|------|------|
| ATOM | 1478 | S1  | LIG | 91 | 16.716 | -11.091 | -2.377 | 1.00 | 0.00 |
| ATOM | 1479 | O1  | LIG | 91 | 18.740 | -14.883 | -0.750 | 1.00 | 0.00 |
| ATOM | 1480 | O2  | LIG | 91 | 15.322 | -10.499 | -2.998 | 1.00 | 0.00 |
| ATOM | 1481 | O3  | LIG | 91 | 17.192 | -10.691 | -0.871 | 1.00 | 0.00 |
| ATOM | 1482 | N1  | LIG | 91 | 16.346 | -12.911 | -2.449 | 1.00 | 0.00 |
| ATOM | 1483 | H1  | LIG | 91 | 15.338 | -13.006 | -2.543 | 1.00 | 0.00 |
| ATOM | 1484 | N2  | LIG | 91 | 18.378 | -13.723 | -1.560 | 1.00 | 0.00 |
| ATOM | 1485 | N3  | LIG | 91 | 21.125 | -10.049 | -6.310 | 1.00 | 0.00 |
| ATOM | 1486 | H10 | LIG | 91 | 20.928 | -9.644  | -7.209 | 1.00 | 0.00 |
| ATOM | 1487 | H11 | LIG | 91 | 22.083 | -10.260 | -6.090 | 1.00 | 0.00 |
| ATOM | 1488 | C1  | LIG | 91 | 18.087 | -10.810 | -3.584 | 1.00 | 0.00 |
| ATOM | 1489 | C2  | LIG | 91 | 17.753 | -10.251 | -4.817 | 1.00 | 0.00 |
| ATOM | 1490 | H2  | LIG | 91 | 16.719 | -10.013 | -5.042 | 1.00 | 0.00 |
| ATOM | 1491 | C3  | LIG | 91 | 19.397 | -11.124 | -3.226 | 1.00 | 0.00 |

|      |      |     |     |    |         |         |        |      |      |
|------|------|-----|-----|----|---------|---------|--------|------|------|
| ATOM | 1492 | H3  | LIG | 91 | 19.614  | -11.583 | -2.269 | 1.00 | 0.00 |
| ATOM | 1493 | C4  | LIG | 91 | 17.056  | -13.841 | -1.714 | 1.00 | 0.00 |
| ATOM | 1494 | C5  | LIG | 91 | 20.117  | -10.301 | -5.407 | 1.00 | 0.00 |
| ATOM | 1495 | C6  | LIG | 91 | 18.772  | -9.995  | -5.728 | 1.00 | 0.00 |
| ATOM | 1496 | H4  | LIG | 91 | 18.535  | -9.556  | -6.692 | 1.00 | 0.00 |
| ATOM | 1497 | C7  | LIG | 91 | 20.410  | -10.870 | -4.144 | 1.00 | 0.00 |
| ATOM | 1498 | H5  | LIG | 91 | 21.437  | -11.113 | -3.891 | 1.00 | 0.00 |
| ATOM | 1499 | C8  | LIG | 91 | 16.525  | -15.013 | -1.074 | 1.00 | 0.00 |
| ATOM | 1500 | H6  | LIG | 91 | 15.495  | -15.329 | -1.050 | 1.00 | 0.00 |
| ATOM | 1501 | C9  | LIG | 91 | 17.601  | -15.627 | -0.501 | 1.00 | 0.00 |
| ATOM | 1502 | C10 | LIG | 91 | 17.772  | -16.862 | 0.309  | 1.00 | 0.00 |
| ATOM | 1503 | H7  | LIG | 91 | 16.810  | -17.361 | 0.450  | 1.00 | 0.00 |
| ATOM | 1504 | H8  | LIG | 91 | 18.458  | -17.560 | -0.183 | 1.00 | 0.00 |
| ATOM | 1505 | H9  | LIG | 91 | 18.191  | -16.627 | 1.293  | 1.00 | 0.00 |
| TER  |      |     |     |    |         |         |        |      |      |
| ATOM | 1506 | S1  | LIG | 92 | -16.163 | 18.755  | 2.344  | 1.00 | 0.00 |
| ATOM | 1507 | O1  | LIG | 92 | -14.588 | 21.874  | 5.330  | 1.00 | 0.00 |
| ATOM | 1508 | O2  | LIG | 92 | -17.513 | 17.991  | 1.818  | 1.00 | 0.00 |
| ATOM | 1509 | O3  | LIG | 92 | -15.430 | 19.878  | 1.418  | 1.00 | 0.00 |
| ATOM | 1510 | N1  | LIG | 92 | -16.834 | 19.557  | 3.881  | 1.00 | 0.00 |
| ATOM | 1511 | H1  | LIG | 92 | -17.847 | 19.562  | 3.797  | 1.00 | 0.00 |
| ATOM | 1512 | N2  | LIG | 92 | -14.860 | 20.633  | 4.610  | 1.00 | 0.00 |

|      |      |     |     |    |         |        |       |      |      |
|------|------|-----|-----|----|---------|--------|-------|------|------|
| ATOM | 1513 | N3  | LIG | 92 | -12.214 | 14.603 | 4.119 | 1.00 | 0.00 |
| ATOM | 1514 | H10 | LIG | 92 | -12.461 | 13.628 | 4.130 | 1.00 | 0.00 |
| ATOM | 1515 | H11 | LIG | 92 | -11.283 | 14.854 | 4.403 | 1.00 | 0.00 |
| ATOM | 1516 | C1  | LIG | 92 | -14.940 | 17.498 | 2.927 | 1.00 | 0.00 |
| ATOM | 1517 | C2  | LIG | 92 | -15.341 | 16.163 | 2.924 | 1.00 | 0.00 |
| ATOM | 1518 | H2  | LIG | 92 | -16.343 | 15.898 | 2.604 | 1.00 | 0.00 |
| ATOM | 1519 | C3  | LIG | 92 | -13.663 | 17.904 | 3.311 | 1.00 | 0.00 |
| ATOM | 1520 | H3  | LIG | 92 | -13.397 | 18.954 | 3.325 | 1.00 | 0.00 |
| ATOM | 1521 | C4  | LIG | 92 | -16.192 | 20.610 | 4.507 | 1.00 | 0.00 |
| ATOM | 1522 | C5  | LIG | 92 | -13.119 | 15.562 | 3.724 | 1.00 | 0.00 |
| ATOM | 1523 | C6  | LIG | 92 | -14.426 | 15.194 | 3.323 | 1.00 | 0.00 |
| ATOM | 1524 | H4  | LIG | 92 | -14.715 | 14.148 | 3.325 | 1.00 | 0.00 |
| ATOM | 1525 | C7  | LIG | 92 | -12.755 | 16.930 | 3.712 | 1.00 | 0.00 |
| ATOM | 1526 | H5  | LIG | 92 | -11.757 | 17.223 | 4.023 | 1.00 | 0.00 |
| ATOM | 1527 | C8  | LIG | 92 | -16.817 | 21.745 | 5.128 | 1.00 | 0.00 |
| ATOM | 1528 | H6  | LIG | 92 | -17.872 | 21.958 | 5.178 | 1.00 | 0.00 |
| ATOM | 1529 | C9  | LIG | 92 | -15.789 | 22.491 | 5.627 | 1.00 | 0.00 |
| ATOM | 1530 | C10 | LIG | 92 | -15.716 | 23.775 | 6.372 | 1.00 | 0.00 |
| ATOM | 1531 | H7  | LIG | 92 | -16.719 | 24.174 | 6.543 | 1.00 | 0.00 |
| ATOM | 1532 | H8  | LIG | 92 | -15.226 | 23.637 | 7.343 | 1.00 | 0.00 |
| ATOM | 1533 | H9  | LIG | 92 | -15.135 | 24.516 | 5.813 | 1.00 | 0.00 |

TER

|      |      |     |     |    |        |         |        |      |      |
|------|------|-----|-----|----|--------|---------|--------|------|------|
| ATOM | 1534 | S1  | LIG | 93 | 14.666 | -11.246 | 18.235 | 1.00 | 0.00 |
| ATOM | 1535 | O1  | LIG | 93 | 18.293 | -8.427  | 18.107 | 1.00 | 0.00 |
| ATOM | 1536 | O2  | LIG | 93 | 14.128 | -12.730 | 17.800 | 1.00 | 0.00 |
| ATOM | 1537 | O3  | LIG | 93 | 14.973 | -10.900 | 19.797 | 1.00 | 0.00 |
| ATOM | 1538 | N1  | LIG | 93 | 16.248 | -11.186 | 17.261 | 1.00 | 0.00 |
| ATOM | 1539 | H1  | LIG | 93 | 16.477 | -12.143 | 17.006 | 1.00 | 0.00 |
| ATOM | 1540 | N2  | LIG | 93 | 16.980 | -9.034  | 17.907 | 1.00 | 0.00 |
| ATOM | 1541 | N3  | LIG | 93 | 10.994 | -7.138  | 15.863 | 1.00 | 0.00 |
| ATOM | 1542 | H10 | LIG | 93 | 10.247 | -7.408  | 15.247 | 1.00 | 0.00 |
| ATOM | 1543 | H11 | LIG | 93 | 11.096 | -6.160  | 16.076 | 1.00 | 0.00 |
| ATOM | 1544 | C1  | LIG | 93 | 13.568 | -9.959  | 17.491 | 1.00 | 0.00 |
| ATOM | 1545 | C2  | LIG | 93 | 12.553 | -10.395 | 16.641 | 1.00 | 0.00 |
| ATOM | 1546 | H2  | LIG | 93 | 12.441 | -11.451 | 16.427 | 1.00 | 0.00 |
| ATOM | 1547 | C3  | LIG | 93 | 13.758 | -8.617  | 17.820 | 1.00 | 0.00 |
| ATOM | 1548 | H3  | LIG | 93 | 14.575 | -8.315  | 18.463 | 1.00 | 0.00 |
| ATOM | 1549 | C4  | LIG | 93 | 17.261 | -10.291 | 17.550 | 1.00 | 0.00 |
| ATOM | 1550 | C5  | LIG | 93 | 11.847 | -8.074  | 16.402 | 1.00 | 0.00 |
| ATOM | 1551 | C6  | LIG | 93 | 11.690 | -9.448  | 16.097 | 1.00 | 0.00 |
| ATOM | 1552 | H4  | LIG | 93 | 10.890 | -9.764  | 15.437 | 1.00 | 0.00 |
| ATOM | 1553 | C7  | LIG | 93 | 12.894 | -7.676  | 17.269 | 1.00 | 0.00 |
| ATOM | 1554 | H5  | LIG | 93 | 13.026 | -6.625  | 17.504 | 1.00 | 0.00 |
| ATOM | 1555 | C8  | LIG | 93 | 18.673 | -10.547 | 17.483 | 1.00 | 0.00 |



|      |      |     |     |    |        |         |         |      |      |
|------|------|-----|-----|----|--------|---------|---------|------|------|
| ATOM | 1556 | H6  | LIG | 93 | 19.152 | -11.477 | 17.224  | 1.00 | 0.00 |
| ATOM | 1557 | C9  | LIG | 93 | 19.268 | -9.367  | 17.827  | 1.00 | 0.00 |
| ATOM | 1558 | C10 | LIG | 93 | 20.681 | -8.929  | 17.967  | 1.00 | 0.00 |
| ATOM | 1559 | H7  | LIG | 93 | 21.360 | -9.752  | 17.732  | 1.00 | 0.00 |
| ATOM | 1560 | H8  | LIG | 93 | 20.899 | -8.092  | 17.295  | 1.00 | 0.00 |
| ATOM | 1561 | H9  | LIG | 93 | 20.883 | -8.591  | 18.989  | 1.00 | 0.00 |
| TER  |      |     |     |    |        |         |         |      |      |
| ATOM | 1562 | S1  | LIG | 94 | 14.772 | 14.391  | -18.260 | 1.00 | 0.00 |
| ATOM | 1563 | O1  | LIG | 94 | 18.705 | 15.354  | -16.086 | 1.00 | 0.00 |
| ATOM | 1564 | O2  | LIG | 94 | 13.222 | 14.877  | -18.469 | 1.00 | 0.00 |
| ATOM | 1565 | O3  | LIG | 94 | 15.868 | 14.574  | -19.452 | 1.00 | 0.00 |
| ATOM | 1566 | N1  | LIG | 94 | 15.244 | 15.455  | -16.812 | 1.00 | 0.00 |
| ATOM | 1567 | H1  | LIG | 94 | 14.567 | 16.212  | -16.765 | 1.00 | 0.00 |
| ATOM | 1568 | N2  | LIG | 94 | 17.472 | 14.716  | -16.539 | 1.00 | 0.00 |
| ATOM | 1569 | N3  | LIG | 94 | 14.724 | 8.715   | -16.316 | 1.00 | 0.00 |
| ATOM | 1570 | H10 | LIG | 94 | 13.858 | 8.250   | -16.105 | 1.00 | 0.00 |
| ATOM | 1571 | H11 | LIG | 94 | 15.577 | 8.194   | -16.202 | 1.00 | 0.00 |
| ATOM | 1572 | C1  | LIG | 94 | 14.785 | 12.653  | -17.631 | 1.00 | 0.00 |
| ATOM | 1573 | C2  | LIG | 94 | 13.554 | 12.062  | -17.351 | 1.00 | 0.00 |
| ATOM | 1574 | H2  | LIG | 94 | 12.638 | 12.625  | -17.490 | 1.00 | 0.00 |
| ATOM | 1575 | C3  | LIG | 94 | 15.998 | 11.979  | -17.490 | 1.00 | 0.00 |
| ATOM | 1576 | H3  | LIG | 94 | 16.936 | 12.481  | -17.692 | 1.00 | 0.00 |

|      |      |     |     |    |        |        |         |      |      |
|------|------|-----|-----|----|--------|--------|---------|------|------|
| ATOM | 1577 | C4  | LIG | 94 | 16.561 | 15.691 | -16.465 | 1.00 | 0.00 |
| ATOM | 1578 | C5  | LIG | 94 | 14.743 | 10.021 | -16.751 | 1.00 | 0.00 |
| ATOM | 1579 | C6  | LIG | 94 | 13.535 | 10.742 | -16.912 | 1.00 | 0.00 |
| ATOM | 1580 | H4  | LIG | 94 | 12.588 | 10.261 | -16.692 | 1.00 | 0.00 |
| ATOM | 1581 | C7  | LIG | 94 | 15.971 | 10.662 | -17.046 | 1.00 | 0.00 |
| ATOM | 1582 | H5  | LIG | 94 | 16.903 | 10.119 | -16.922 | 1.00 | 0.00 |
| ATOM | 1583 | C8  | LIG | 94 | 17.109 | 16.926 | -15.974 | 1.00 | 0.00 |
| ATOM | 1584 | H6  | LIG | 94 | 16.584 | 17.855 | -15.827 | 1.00 | 0.00 |
| ATOM | 1585 | C9  | LIG | 94 | 18.430 | 16.667 | -15.747 | 1.00 | 0.00 |
| ATOM | 1586 | C10 | LIG | 94 | 19.569 | 17.483 | -15.251 | 1.00 | 0.00 |
| ATOM | 1587 | H7  | LIG | 94 | 19.239 | 18.500 | -15.025 | 1.00 | 0.00 |
| ATOM | 1588 | H8  | LIG | 94 | 19.997 | 17.045 | -14.343 | 1.00 | 0.00 |
| ATOM | 1589 | H9  | LIG | 94 | 20.366 | 17.533 | -16.000 | 1.00 | 0.00 |

TER

|      |      |    |     |    |         |        |        |      |      |
|------|------|----|-----|----|---------|--------|--------|------|------|
| ATOM | 1590 | S1 | LIG | 95 | -18.275 | 0.134  | 15.963 | 1.00 | 0.00 |
| ATOM | 1591 | O1 | LIG | 95 | -14.035 | 1.345  | 17.257 | 1.00 | 0.00 |
| ATOM | 1592 | O2 | LIG | 95 | -19.487 | 0.475  | 14.915 | 1.00 | 0.00 |
| ATOM | 1593 | O3 | LIG | 95 | -17.391 | -1.224 | 15.798 | 1.00 | 0.00 |
| ATOM | 1594 | N1 | LIG | 95 | -17.193 | 1.620  | 15.688 | 1.00 | 0.00 |
| ATOM | 1595 | H1 | LIG | 95 | -17.472 | 2.031  | 14.801 | 1.00 | 0.00 |
| ATOM | 1596 | N2 | LIG | 95 | -15.473 | 1.095  | 17.221 | 1.00 | 0.00 |
| ATOM | 1597 | N3 | LIG | 95 | -20.435 | 0.557  | 21.544 | 1.00 | 0.00 |

|      |      |     |     |    |         |        |         |      |      |
|------|------|-----|-----|----|---------|--------|---------|------|------|
| ATOM | 1598 | H10 | LIG | 95 | -21.376 | 0.870  | 21.710  | 1.00 | 0.00 |
| ATOM | 1599 | H11 | LIG | 95 | -19.877 | 0.306  | 22.342  | 1.00 | 0.00 |
| ATOM | 1600 | C1  | LIG | 95 | -18.907 | 0.288  | 17.694  | 1.00 | 0.00 |
| ATOM | 1601 | C2  | LIG | 95 | -20.218 | 0.732  | 17.861  | 1.00 | 0.00 |
| ATOM | 1602 | H2  | LIG | 95 | -20.819 | 0.987  | 16.996  | 1.00 | 0.00 |
| ATOM | 1603 | C3  | LIG | 95 | -18.086 | -0.072 | 18.762  | 1.00 | 0.00 |
| ATOM | 1604 | H3  | LIG | 95 | -17.064 | -0.387 | 18.593  | 1.00 | 0.00 |
| ATOM | 1605 | C4  | LIG | 95 | -15.865 | 1.649  | 16.069  | 1.00 | 0.00 |
| ATOM | 1606 | C5  | LIG | 95 | -19.930 | 0.469  | 20.267  | 1.00 | 0.00 |
| ATOM | 1607 | C6  | LIG | 95 | -20.729 | 0.821  | 19.152  | 1.00 | 0.00 |
| ATOM | 1608 | H4  | LIG | 95 | -21.748 | 1.160  | 19.307  | 1.00 | 0.00 |
| ATOM | 1609 | C7  | LIG | 95 | -18.603 | 0.024  | 20.050  | 1.00 | 0.00 |
| ATOM | 1610 | H5  | LIG | 95 | -17.981 | -0.244 | 20.898  | 1.00 | 0.00 |
| ATOM | 1611 | C8  | LIG | 95 | -14.781 | 2.264  | 15.353  | 1.00 | 0.00 |
| ATOM | 1612 | H6  | LIG | 95 | -14.837 | 2.771  | 14.403  | 1.00 | 0.00 |
| ATOM | 1613 | C9  | LIG | 95 | -13.677 | 2.058  | 16.127  | 1.00 | 0.00 |
| ATOM | 1614 | C10 | LIG | 95 | -12.241 | 2.417  | 15.989  | 1.00 | 0.00 |
| ATOM | 1615 | H7  | LIG | 95 | -12.074 | 2.967  | 15.059  | 1.00 | 0.00 |
| ATOM | 1616 | H8  | LIG | 95 | -11.911 | 3.040  | 16.828  | 1.00 | 0.00 |
| ATOM | 1617 | H9  | LIG | 95 | -11.615 | 1.518  | 15.981  | 1.00 | 0.00 |
| TER  |      |     |     |    |         |        |         |      |      |
| ATOM | 1618 | S1  | LIG | 96 | -3.597  | 6.733  | -17.568 | 1.00 | 0.00 |

|      |      |     |     |    |        |        |         |      |      |
|------|------|-----|-----|----|--------|--------|---------|------|------|
| ATOM | 1619 | O1  | LIG | 96 | -2.824 | 11.196 | -16.785 | 1.00 | 0.00 |
| ATOM | 1620 | O2  | LIG | 96 | -3.772 | 5.274  | -16.845 | 1.00 | 0.00 |
| ATOM | 1621 | O3  | LIG | 96 | -4.879 | 7.495  | -18.225 | 1.00 | 0.00 |
| ATOM | 1622 | N1  | LIG | 96 | -2.954 | 7.722  | -16.131 | 1.00 | 0.00 |
| ATOM | 1623 | H1  | LIG | 96 | -3.181 | 7.202  | -15.287 | 1.00 | 0.00 |
| ATOM | 1624 | N2  | LIG | 96 | -2.705 | 9.806  | -17.217 | 1.00 | 0.00 |
| ATOM | 1625 | N3  | LIG | 96 | 0.870  | 6.339  | -21.554 | 1.00 | 0.00 |
| ATOM | 1626 | H10 | LIG | 96 | 1.415  | 5.498  | -21.635 | 1.00 | 0.00 |
| ATOM | 1627 | H11 | LIG | 96 | 1.091  | 7.103  | -22.169 | 1.00 | 0.00 |
| ATOM | 1628 | C1  | LIG | 96 | -2.204 | 6.648  | -18.781 | 1.00 | 0.00 |
| ATOM | 1629 | C2  | LIG | 96 | -1.481 | 5.457  | -18.845 | 1.00 | 0.00 |
| ATOM | 1630 | H2  | LIG | 96 | -1.734 | 4.633  | -18.188 | 1.00 | 0.00 |
| ATOM | 1631 | C3  | LIG | 96 | -1.942 | 7.739  | -19.607 | 1.00 | 0.00 |
| ATOM | 1632 | H3  | LIG | 96 | -2.508 | 8.657  | -19.509 | 1.00 | 0.00 |
| ATOM | 1633 | C4  | LIG | 96 | -2.980 | 9.103  | -16.113 | 1.00 | 0.00 |
| ATOM | 1634 | C5  | LIG | 96 | -0.149 | 6.441  | -20.634 | 1.00 | 0.00 |
| ATOM | 1635 | C6  | LIG | 96 | -0.452 | 5.356  | -19.776 | 1.00 | 0.00 |
| ATOM | 1636 | H4  | LIG | 96 | 0.121  | 4.437  | -19.847 | 1.00 | 0.00 |
| ATOM | 1637 | C7  | LIG | 96 | -0.909 | 7.631  | -20.532 | 1.00 | 0.00 |
| ATOM | 1638 | H5  | LIG | 96 | -0.680 | 8.470  | -21.181 | 1.00 | 0.00 |
| ATOM | 1639 | C8  | LIG | 96 | -3.253 | 9.940  | -14.977 | 1.00 | 0.00 |
| ATOM | 1640 | H6  | LIG | 96 | -3.503 | 9.618  | -13.980 | 1.00 | 0.00 |

|      |      |     |     |    |        |        |         |      |      |
|------|------|-----|-----|----|--------|--------|---------|------|------|
| ATOM | 1641 | C9  | LIG | 96 | -3.138 | 11.219 | -15.438 | 1.00 | 0.00 |
| ATOM | 1642 | C10 | LIG | 96 | -3.293 | 12.558 | -14.810 | 1.00 | 0.00 |
| ATOM | 1643 | H7  | LIG | 96 | -3.549 | 12.455 | -13.753 | 1.00 | 0.00 |
| ATOM | 1644 | H8  | LIG | 96 | -2.366 | 13.137 | -14.891 | 1.00 | 0.00 |
| ATOM | 1645 | H9  | LIG | 96 | -4.084 | 13.131 | -15.307 | 1.00 | 0.00 |
| TER  |      |     |     |    |        |        |         |      |      |
| ATOM | 1646 | S1  | LIG | 97 | 16.162 | 24.905 | -12.239 | 1.00 | 0.00 |
| ATOM | 1647 | O1  | LIG | 97 | 18.895 | 22.403 | -9.520  | 1.00 | 0.00 |
| ATOM | 1648 | O2  | LIG | 97 | 15.811 | 26.431 | -12.718 | 1.00 | 0.00 |
| ATOM | 1649 | O3  | LIG | 97 | 16.910 | 23.868 | -13.249 | 1.00 | 0.00 |
| ATOM | 1650 | N1  | LIG | 97 | 17.270 | 25.275 | -10.793 | 1.00 | 0.00 |
| ATOM | 1651 | H1  | LIG | 97 | 17.582 | 26.237 | -10.896 | 1.00 | 0.00 |
| ATOM | 1652 | N2  | LIG | 97 | 17.740 | 23.057 | -10.129 | 1.00 | 0.00 |
| ATOM | 1653 | N3  | LIG | 97 | 11.167 | 22.428 | -10.023 | 1.00 | 0.00 |
| ATOM | 1654 | H10 | LIG | 97 | 10.323 | 22.967 | -9.928  | 1.00 | 0.00 |
| ATOM | 1655 | H11 | LIG | 97 | 11.140 | 21.462 | -9.747  | 1.00 | 0.00 |
| ATOM | 1656 | C1  | LIG | 97 | 14.645 | 24.128 | -11.523 | 1.00 | 0.00 |
| ATOM | 1657 | C2  | LIG | 97 | 13.507 | 24.926 | -11.412 | 1.00 | 0.00 |
| ATOM | 1658 | H2  | LIG | 97 | 13.539 | 25.963 | -11.724 | 1.00 | 0.00 |
| ATOM | 1659 | C3  | LIG | 97 | 14.667 | 22.784 | -11.154 | 1.00 | 0.00 |
| ATOM | 1660 | H3  | LIG | 97 | 15.578 | 22.204 | -11.230 | 1.00 | 0.00 |
| ATOM | 1661 | C4  | LIG | 97 | 18.123 | 24.331 | -10.254 | 1.00 | 0.00 |

|      |      |     |     |    |        |         |         |      |      |
|------|------|-----|-----|----|--------|---------|---------|------|------|
| ATOM | 1662 | C5  | LIG | 97 | 12.320 | 22.993  | -10.520 | 1.00 | 0.00 |
| ATOM | 1663 | C6  | LIG | 97 | 12.342 | 24.354  | -10.910 | 1.00 | 0.00 |
| ATOM | 1664 | H4  | LIG | 97 | 11.443 | 24.955  | -10.819 | 1.00 | 0.00 |
| ATOM | 1665 | C7  | LIG | 97 | 13.500 | 22.221  | -10.649 | 1.00 | 0.00 |
| ATOM | 1666 | H5  | LIG | 97 | 13.494 | 21.178  | -10.348 | 1.00 | 0.00 |
| ATOM | 1667 | C8  | LIG | 97 | 19.449 | 24.563  | -9.750  | 1.00 | 0.00 |
| ATOM | 1668 | H6  | LIG | 97 | 19.983 | 25.499  | -9.739  | 1.00 | 0.00 |
| ATOM | 1669 | C9  | LIG | 97 | 19.880 | 23.349  | -9.301  | 1.00 | 0.00 |
| ATOM | 1670 | C10 | LIG | 97 | 21.140 | 22.870  | -8.674  | 1.00 | 0.00 |
| ATOM | 1671 | H7  | LIG | 97 | 21.845 | 23.697  | -8.559  | 1.00 | 0.00 |
| ATOM | 1672 | H8  | LIG | 97 | 20.945 | 22.437  | -7.687  | 1.00 | 0.00 |
| ATOM | 1673 | H9  | LIG | 97 | 21.609 | 22.094  | -9.288  | 1.00 | 0.00 |
| TER  |      |     |     |    |        |         |         |      |      |
| ATOM | 1674 | S1  | LIG | 98 | -2.702 | -14.726 | 13.113  | 1.00 | 0.00 |
| ATOM | 1675 | O1  | LIG | 98 | -0.127 | -11.220 | 14.596  | 1.00 | 0.00 |
| ATOM | 1676 | O2  | LIG | 98 | -2.938 | -15.759 | 11.865  | 1.00 | 0.00 |
| ATOM | 1677 | O3  | LIG | 98 | -2.060 | -15.251 | 14.516  | 1.00 | 0.00 |
| ATOM | 1678 | N1  | LIG | 98 | -1.540 | -13.519 | 12.309  | 1.00 | 0.00 |
| ATOM | 1679 | H1  | LIG | 98 | -1.153 | -13.979 | 11.490  | 1.00 | 0.00 |
| ATOM | 1680 | N2  | LIG | 98 | -1.237 | -12.048 | 14.133  | 1.00 | 0.00 |
| ATOM | 1681 | N3  | LIG | 98 | -7.836 | -11.794 | 14.132  | 1.00 | 0.00 |
| ATOM | 1682 | H10 | LIG | 98 | -8.631 | -11.923 | 13.531  | 1.00 | 0.00 |

|      |      |     |     |    |        |         |         |      |      |
|------|------|-----|-----|----|--------|---------|---------|------|------|
| ATOM | 1683 | H11 | LIG | 98 | -7.935 | -11.167 | 14.912  | 1.00 | 0.00 |
| ATOM | 1684 | C1  | LIG | 98 | -4.262 | -13.786 | 13.428  | 1.00 | 0.00 |
| ATOM | 1685 | C2  | LIG | 98 | -5.330 | -14.004 | 12.559  | 1.00 | 0.00 |
| ATOM | 1686 | H2  | LIG | 98 | -5.220 | -14.691 | 11.727  | 1.00 | 0.00 |
| ATOM | 1687 | C3  | LIG | 98 | -4.341 | -12.929 | 14.525  | 1.00 | 0.00 |
| ATOM | 1688 | H3  | LIG | 98 | -3.481 | -12.765 | 15.163  | 1.00 | 0.00 |
| ATOM | 1689 | C4  | LIG | 98 | -0.755 | -12.648 | 13.041  | 1.00 | 0.00 |
| ATOM | 1690 | C5  | LIG | 98 | -6.651 | -12.454 | 13.897  | 1.00 | 0.00 |
| ATOM | 1691 | C6  | LIG | 98 | -6.527 | -13.337 | 12.796  | 1.00 | 0.00 |
| ATOM | 1692 | H4  | LIG | 98 | -7.372 | -13.494 | 12.135  | 1.00 | 0.00 |
| ATOM | 1693 | C7  | LIG | 98 | -5.540 | -12.262 | 14.754  | 1.00 | 0.00 |
| ATOM | 1694 | H5  | LIG | 98 | -5.624 | -11.584 | 15.597  | 1.00 | 0.00 |
| ATOM | 1695 | C8  | LIG | 98 | 0.595  | -12.255 | 12.742  | 1.00 | 0.00 |
| ATOM | 1696 | H6  | LIG | 98 | 1.203  | -12.597 | 11.921  | 1.00 | 0.00 |
| ATOM | 1697 | C9  | LIG | 98 | 0.935  | -11.369 | 13.723  | 1.00 | 0.00 |
| ATOM | 1698 | C10 | LIG | 98 | 2.165  | -10.590 | 14.025  | 1.00 | 0.00 |
| ATOM | 1699 | H7  | LIG | 98 | 2.937  | -10.792 | 13.279  | 1.00 | 0.00 |
| ATOM | 1700 | H8  | LIG | 98 | 1.956  | -9.515  | 14.029  | 1.00 | 0.00 |
| ATOM | 1701 | H9  | LIG | 98 | 2.557  | -10.852 | 15.014  | 1.00 | 0.00 |
| TER  |      |     |     |    |        |         |         |      |      |
| ATOM | 1702 | S1  | LIG | 99 | -9.516 | -22.562 | -20.054 | 1.00 | 0.00 |
| ATOM | 1703 | O1  | LIG | 99 | -9.443 | -18.646 | -17.649 | 1.00 | 0.00 |

|      |      |     |     |    |         |         |         |      |      |
|------|------|-----|-----|----|---------|---------|---------|------|------|
| ATOM | 1704 | O2  | LIG | 99 | -10.476 | -23.561 | -20.926 | 1.00 | 0.00 |
| ATOM | 1705 | O3  | LIG | 99 | -8.382  | -21.649 | -20.786 | 1.00 | 0.00 |
| ATOM | 1706 | N1  | LIG | 99 | -10.809 | -21.460 | -19.299 | 1.00 | 0.00 |
| ATOM | 1707 | H1  | LIG | 99 | -11.656 | -21.574 | -19.850 | 1.00 | 0.00 |
| ATOM | 1708 | N2  | LIG | 99 | -9.387  | -20.050 | -18.045 | 1.00 | 0.00 |
| ATOM | 1709 | N3  | LIG | 99 | -7.083  | -25.724 | -15.573 | 1.00 | 0.00 |
| ATOM | 1710 | H10 | LIG | 99 | -7.346  | -26.682 | -15.417 | 1.00 | 0.00 |
| ATOM | 1711 | H11 | LIG | 99 | -6.394  | -25.320 | -14.962 | 1.00 | 0.00 |
| ATOM | 1712 | C1  | LIG | 99 | -8.777  | -23.505 | -18.646 | 1.00 | 0.00 |
| ATOM | 1713 | C2  | LIG | 99 | -9.183  | -24.828 | -18.477 | 1.00 | 0.00 |
| ATOM | 1714 | H2  | LIG | 99 | -9.916  | -25.260 | -19.147 | 1.00 | 0.00 |
| ATOM | 1715 | C3  | LIG | 99 | -7.827  | -22.894 | -17.830 | 1.00 | 0.00 |
| ATOM | 1716 | H3  | LIG | 99 | -7.557  | -21.855 | -17.976 | 1.00 | 0.00 |
| ATOM | 1717 | C4  | LIG | 99 | -10.505 | -20.226 | -18.756 | 1.00 | 0.00 |
| ATOM | 1718 | C5  | LIG | 99 | -7.646  | -24.989 | -16.592 | 1.00 | 0.00 |
| ATOM | 1719 | C6  | LIG | 99 | -8.613  | -25.570 | -17.447 | 1.00 | 0.00 |
| ATOM | 1720 | H4  | LIG | 99 | -8.910  | -26.603 | -17.299 | 1.00 | 0.00 |
| ATOM | 1721 | C7  | LIG | 99 | -7.265  | -23.641 | -16.800 | 1.00 | 0.00 |
| ATOM | 1722 | H5  | LIG | 99 | -6.529  | -23.185 | -16.146 | 1.00 | 0.00 |
| ATOM | 1723 | C8  | LIG | 99 | -11.304 | -19.034 | -18.838 | 1.00 | 0.00 |
| ATOM | 1724 | H6  | LIG | 99 | -12.243 | -18.918 | -19.353 | 1.00 | 0.00 |
| ATOM | 1725 | C9  | LIG | 99 | -10.613 | -18.091 | -18.135 | 1.00 | 0.00 |



|      |      |     |     |     |         |         |         |      |      |
|------|------|-----|-----|-----|---------|---------|---------|------|------|
| ATOM | 1726 | C10 | LIG | 99  | -10.854 | -16.658 | -17.823 | 1.00 | 0.00 |
| ATOM | 1727 | H7  | LIG | 99  | -11.798 | -16.326 | -18.263 | 1.00 | 0.00 |
| ATOM | 1728 | H8  | LIG | 99  | -10.897 | -16.495 | -16.740 | 1.00 | 0.00 |
| ATOM | 1729 | H9  | LIG | 99  | -10.046 | -16.033 | -18.217 | 1.00 | 0.00 |
| TER  |      |     |     |     |         |         |         |      |      |
| ATOM | 1730 | S1  | LIG | 100 | 12.376  | 20.911  | 6.837   | 1.00 | 0.00 |
| ATOM | 1731 | O1  | LIG | 100 | 13.939  | 24.578  | 9.125   | 1.00 | 0.00 |
| ATOM | 1732 | O2  | LIG | 100 | 12.829  | 19.523  | 6.095   | 1.00 | 0.00 |
| ATOM | 1733 | O3  | LIG | 100 | 11.590  | 20.872  | 8.264   | 1.00 | 0.00 |
| ATOM | 1734 | N1  | LIG | 100 | 14.041  | 21.704  | 7.065   | 1.00 | 0.00 |
| ATOM | 1735 | H1  | LIG | 100 | 14.737  | 20.969  | 6.967   | 1.00 | 0.00 |
| ATOM | 1736 | N2  | LIG | 100 | 13.343  | 23.698  | 8.123   | 1.00 | 0.00 |
| ATOM | 1737 | N3  | LIG | 100 | 9.368   | 24.271  | 2.881   | 1.00 | 0.00 |
| ATOM | 1738 | H10 | LIG | 100 | 9.278   | 23.982  | 1.922   | 1.00 | 0.00 |
| ATOM | 1739 | H11 | LIG | 100 | 8.928   | 25.133  | 3.154   | 1.00 | 0.00 |
| ATOM | 1740 | C1  | LIG | 100 | 11.473  | 21.980  | 5.630   | 1.00 | 0.00 |
| ATOM | 1741 | C2  | LIG | 100 | 11.385  | 21.528  | 4.313   | 1.00 | 0.00 |
| ATOM | 1742 | H2  | LIG | 100 | 11.850  | 20.592  | 4.029   | 1.00 | 0.00 |
| ATOM | 1743 | C3  | LIG | 100 | 10.884  | 23.166  | 6.065   | 1.00 | 0.00 |
| ATOM | 1744 | H3  | LIG | 100 | 10.998  | 23.497  | 7.090   | 1.00 | 0.00 |
| ATOM | 1745 | C4  | LIG | 100 | 14.254  | 22.733  | 7.963   | 1.00 | 0.00 |
| ATOM | 1746 | C5  | LIG | 100 | 10.066  | 23.511  | 3.791   | 1.00 | 0.00 |

|      |      |     |     |     |        |        |        |      |      |
|------|------|-----|-----|-----|--------|--------|--------|------|------|
| ATOM | 1747 | C6  | LIG | 100 | 10.678 | 22.297 | 3.394  | 1.00 | 0.00 |
| ATOM | 1748 | H4  | LIG | 100 | 10.593 | 21.963 | 2.365  | 1.00 | 0.00 |
| ATOM | 1749 | C7  | LIG | 100 | 10.183 | 23.931 | 5.139  | 1.00 | 0.00 |
| ATOM | 1750 | H5  | LIG | 100 | 9.722  | 24.863 | 5.452  | 1.00 | 0.00 |
| ATOM | 1751 | C8  | LIG | 100 | 15.420 | 22.930 | 8.780  | 1.00 | 0.00 |
| ATOM | 1752 | H6  | LIG | 100 | 16.288 | 22.294 | 8.834  | 1.00 | 0.00 |
| ATOM | 1753 | C9  | LIG | 100 | 15.182 | 24.082 | 9.472  | 1.00 | 0.00 |
| ATOM | 1754 | C10 | LIG | 100 | 15.953 | 24.854 | 10.482 | 1.00 | 0.00 |
| ATOM | 1755 | H7  | LIG | 100 | 16.910 | 24.367 | 10.684 | 1.00 | 0.00 |
| ATOM | 1756 | H8  | LIG | 100 | 16.147 | 25.873 | 10.131 | 1.00 | 0.00 |
| ATOM | 1757 | H9  | LIG | 100 | 15.394 | 24.930 | 11.421 | 1.00 | 0.00 |
| TER  |      |     |     |     |        |        |        |      |      |
| END  |      |     |     |     |        |        |        |      |      |
